# Supplementary material for: Multiphoton imaging of neural structure and activity in Drosophila through the intact cuticle
Source: eLife. 2022 Jan 24;11:e69094. doi: 10.7554/eLife.69094 (PMC8846588; doi:10.7554/eLife.69094)
Supplement: Figure 1—source data 1. [file elife-69094-fig1-data1.xlsx]

## Sheet: Ballistic transmission
Sample number	852	911	980	1056	1300	1552	1624			852	911	980	1056	1300	1552	1624
1	0.711538	0.884593	0.799449	0.920354	0.993774	0.983051	0.964607		1	0.751442	0.863052	0.82089	0.880752	0.952866	0.937288	0.9472
1	0.692308	0.782806	0.639789	0.831858	0.957854	0.930508	0.995068		2	0.866133	0.881008	#DIV/0!	0.917622	0.95468	0.917729	0.945774
1	0.75	0.842121	0.862623	0.820354	0.933908	0.886441	0.953003		3	0.797397	0.838095	0.821183	0.909643	0.947861	0.862831	0.956577
1	0.788462	0.916813	0.862623	0.885841	0.97342	0.957627	0.970409		4	0.795147	0.847281	0.812704	0.847894	0.922084	0.90992	0.95209
1	0.782692	0.912419	0.840799	0.884956	0.966236	0.90339	0.951552		5	0.704131	0.853965	0.78113	0.819491	0.944505	0.922097	0.863714
1	0.826923	0.871412	0.876407	0.902655	0.985393	0.933898	0.883377
1	0.75	0.890451	0.878704	0.954867	0.965038	0.99322	0.966057
1	0.821154	0.937317	0.92465	0.966372	0.974617	0.977966	0.984914
1	0.782692	0.890451	0.777625	0.893805	0.945881	0.916949	0.834059
1	0.584615	0.732279	0.769584	0.769912	0.87045	0.869492	0.929794
1	0.798077	0.790861	0.827016	0.840708	0.921935	0.923729	0.954453
1	0.728846	0.905097	0.791408	0.897345	0.945881	0.971186	0.979112
2	0.923341	0.890251	NaN	0.910491	0.997459	1.00035	0.995215
2	0.966819	0.914575	NaN	0.970392	0.911055	0.963173	0.808612
2	0.840961	0.836739	NaN	0.830909	0.939009	0.842776	0.958533
2	0.83524	0.914575	NaN	0.961835	0.963151	0.931303	0.963317
2	0.76087	0.805604	NaN	0.877118	0.926302	0.879958	0.985646
2	0.869565	0.924304	NaN	0.954989	0.991105	0.88881	0.963317
3	0.564317	0.694809	0.567546	0.883915	0.890374	0.637681	0.939583
3	0.774449	0.879839	0.729702	0.974203	0.97861	0.933977	0.998103
3	0.798238	0.642386	0.741284	0.904401	0.995989	0.919485	0.985099
3	0.881498	0.952108	0.886066	0.986343	0.979947	0.954911	0.976971
3	0.823348	0.814454	0.946296	0.929439	0.919786	0.853462	0.97372
3	0.859031	0.940637	0.920235	1.00531	0.963904	0.908213	0.978597
3	0.713656	0.776599	0.873557	0.883156	0.941176	0.925926	0.963966
3	0.753304	0.765128	0.731786	0.884674	0.899733	0.795491	0.924953
3	0.845815	0.963579	0.926605	0.92868	0.938503	0.795491	0.963966
3	0.92511	0.917694	0.827574	0.786039	0.971925	0.94847	0.910322
3	0.832599	0.87181	0.88236	0.839909	0.946524	0.818035	0.907071
4	0.560859	0.787234	0.455024	0.831653	0.893398	0.859296	0.947291
4	0.644391	0.648936	0.736617	0.751008	0.80103	0.869347	0.884334
4	0.739857	0.5	0.493638	0.829637	0.710176	0.824121	0.830161
4	0.501193	0.617021	0.623958	0.540323	0.826772	0.819095	0.82284
4	0.804296	0.882979	0.899517	0.846774	0.96911	0.911223	0.97511
4	0.71599	0.829787	0.66663	0.887097	0.94791	0.969849	0.966325
4	0.826969	0.911702	0.805178	0.836694	0.949425	0.921273	0.937042
4	0.890215	0.97234	0.924419	0.845766	0.984252	0.901173	0.989751
4	0.912888	0.808511	0.943396	0.931452	0.964567	0.944724	0.989751
4	0.930788	0.861702	0.970821	0.888105	0.993337	1.00838	0.983895
4	0.853222	0.914894	0.89842	0.877016	0.984252	0.865997	0.97511
4	0.799523	0.87234	0.808469	0.774194	0.937311	0.946399	0.954612
4	0.73031	0.914894	0.864195	0.921371	0.699576	0.916248	0.976574
4	0.854415	0.925532	0.864524	0.882056	0.978195	0.879397	0.978038
4	0.893795	0.989362	0.926942	0.936492	0.98728	0.998325	0.979502
4	0.930788	0.962766	0.921457	0.844758	0.993337	0.924623	0.97511
4	0.942721	0.968085	0.926942	0.975806	1.00091	0.892797	0.992679
4	0.78043	0.882979	0.89853	0.861895	0.976681	0.926298	0.979502
5	0.521405	0.921162	0.950344	0.864804	1.00981	0.993538	0.991946
5	0.876326	0.95332	0.617724	0.651397	0.990185	0.948304	0.943624
5	0.622942	0.951245	0.936089	0.996648	0.950927	0.843296	0.965101
5	0.836078	0.928423	0.497743	0.927374	0.839695	0.894992	0.856376
5	0.756952	0.872407	0.612972	0.814525	0.964013	0.907916	0.345235
5	0.678833	0.674274	0.887384	0.805587	0.944384	0.930533	0.939597
5	0.732711	0.736515	0.7579	0.707263	0.89422	0.92084	0.805369
5	0.591566	0.826763	0.873129	0.813408	0.964013	0.928918	0.978523
5	0.720362	0.821577	0.896888	0.794413	0.943293	0.930533	0.947651
	852	911	980	1056	1300	1552	1624
	0.779202	0.853544	0.810851	0.86997	0.940839	0.909329	0.937044
	0.0147	0.0135339	0.0185031	0.0113348	0.00844585	0.00848792	0.0126488
	56	56	50	56	56	56	56

## Sheet: Total transmission
Sample number	514	630	852	911	980	1056	1300	1552	1624		Sample number	514	630	852	911	980	1056	1300	1552	1624
1	0.505376	0.840272	0.782077	0.677428	0.882634	0.893048	0.824437	0.865316	0.97474		1	0.660932	0.783673	0.874406	0.797036	0.843193	0.941889	0.931594	0.895908	0.971273
1	0.713978	0.786939	0.928717	0.858428	0.957061	0.991444	0.98102	0.97497	0.965825		2	0.611611	0.702345	0.785457	0.789081	0.851293	0.880015	0.854054	0.948444	0.950265
1	0.763441	0.72381	0.912424	0.855253	0.689885	0.941176	0.989324	0.847437	0.973254		3	0.666136	0.736434	0.872443	0.861709	0.915798	0.845614	0.930147	0.919035	0.959429
2	0.552699	0.626886	0.831037	0.812162	0.939655	0.933056	0.84024	0.982002	0.898946		4	0.615749	0.81675	0.934947	0.941084	0.900359	0.914428	0.978916	0.930522	0.98609
2	0.517352	0.73485	0.890396	0.940233	0.889655	0.931322	0.890969	1	0.99194
2	0.703728	0.704667	0.882976	0.930862	0.886207	0.932189	0.878823	0.938133	0.961976
2	0.65874	0.671001	0.915836	0.89546	0.992241	0.927853	0.88954	0.951631	0.988841
2	0.616967	0.70931	0.720797	0.718451	0.744828	0.849809	0.738068	0.901012	0.981608
2	0.62018	0.767355	0.471698	0.437318	0.655172	0.705862	0.886682	0.917885	0.878281
3	0.711253	0.629845	0.920578	0.93377	0.988589	0.95614	0.991236	0.939791	1.00361
3	0.705945	0.791344	0.946901	0.991529	0.90301	0.937719	0.982925	0.958115	0.969916
3	0.717887	0.768734	0.970217	0.924143	0.963998	0.921053	0.981414	0.929319	0.977136
3	0.683386	0.872093	0.970217	0.949172	0.976785	0.815789	0.99728	1.00262	0.997593
3	0.403397	0.726744	0.704723	0.731613	0.675782	0.903509	0.899063	0.934555	0.916968
3	0.676752	0.515181	0.724278	0.606469	0.98072	0.814912	0.807646	0.680628	0.895307
3	0.764331	0.851098	0.870187	0.895264	0.9217	0.570175	0.851466	0.98822	0.955475
4	0.543478	0.794883	0.944185	0.983553	0.886571	0.921144	0.991423	0.958738	0.982998
4	0.622109	0.798163	0.927168	0.985717	0.881226	0.857886	0.959771	0.95267	0.984544
4	0.733117	0.880166	0.963147	0.941355	0.955932	0.938475	0.998571	0.893204	1.00618
4	0.564292	0.79379	0.90529	0.853711	0.877705	0.940208	0.965897	0.917476	0.970634
	514	630	852	911	980	1056	1300	1552	1624
	0.63892	0.749357	0.859142	0.846095	0.882468	0.884138	0.91729	0.926686	0.963789
	0.0218255	0.020283	0.0276982	0.0323522	0.0237987	0.0219228	0.0172483	0.0159387	0.00827329
	20	20	20	20	20	20	20	20	20

## Sheet: Ballistic transmission_stats
Number of families	1
Number of comparisons per family	21
Alpha	0.05
Tukey's multiple comparisons test	Mean Diff.	95.00% CI of diff.	Below threshold?	Summary	Adjusted P Value
852 vs. 911	-0.07434	-0.1274 to -0.02129	Yes	***	0.0008	A-B
852 vs. 980	-0.03165	-0.08627 to 0.02297	No	ns	0.6046	A-C
852 vs. 1056	-0.09077	-0.1438 to -0.03772	Yes	****	<0.0001	A-D
852 vs. 1300	-0.1616	-0.2147 to -0.1086	Yes	****	<0.0001	A-E
852 vs. 1552	-0.1301	-0.1832 to -0.07708	Yes	****	<0.0001	A-F
852 vs. 1624	-0.1578	-0.2109 to -0.1048	Yes	****	<0.0001	A-G
911 vs. 980	0.04269	-0.01192 to 0.09731	No	ns	0.2385	B-C
911 vs. 1056	-0.01643	-0.06947 to 0.03662	No	ns	0.9696	B-D
911 vs. 1300	-0.0873	-0.1403 to -0.03425	Yes	****	<0.0001	B-E
911 vs. 1552	-0.05578	-0.1088 to -0.002737	Yes	*	0.032	B-F
911 vs. 1624	-0.0835	-0.1365 to -0.03045	Yes	****	<0.0001	B-G
980 vs. 1056	-0.05912	-0.1137 to -0.004504	Yes	*	0.0242	C-D
980 vs. 1300	-0.13	-0.1846 to -0.07537	Yes	****	<0.0001	C-E
980 vs. 1552	-0.09848	-0.1531 to -0.04386	Yes	****	<0.0001	C-F
980 vs. 1624	-0.1262	-0.1808 to -0.07158	Yes	****	<0.0001	C-G
1056 vs. 1300	-0.07087	-0.1239 to -0.01782	Yes	**	0.0017	D-E
1056 vs. 1552	-0.03936	-0.09241 to 0.01369	No	ns	0.2983	D-F
1056 vs. 1624	-0.06707	-0.1201 to -0.01403	Yes	**	0.0039	D-G
1300 vs. 1552	0.03151	-0.02154 to 0.08456	No	ns	0.5755	E-F
1300 vs. 1624	0.003796	-0.04925 to 0.05684	No	ns	>0.9999	E-G
1552 vs. 1624	-0.02772	-0.08076 to 0.02533	No	ns	0.715	F-G
Test details	Mean 1	Mean 2	Mean Diff.	SE of diff.	n1	n2	q	DF
852 vs. 911	0.7792	0.8535	-0.07434	0.0179	56	56	5.875	379
852 vs. 980	0.7792	0.8109	-0.03165	0.01842	56	50	2.429	379
852 vs. 1056	0.7792	0.87	-0.09077	0.0179	56	56	7.173	379
852 vs. 1300	0.7792	0.9408	-0.1616	0.0179	56	56	12.77	379
852 vs. 1552	0.7792	0.9093	-0.1301	0.0179	56	56	10.28	379
852 vs. 1624	0.7792	0.937	-0.1578	0.0179	56	56	12.47	379
911 vs. 980	0.8535	0.8109	0.04269	0.01842	56	50	3.277	379
911 vs. 1056	0.8535	0.87	-0.01643	0.0179	56	56	1.298	379
911 vs. 1300	0.8535	0.9408	-0.0873	0.0179	56	56	6.899	379
911 vs. 1552	0.8535	0.9093	-0.05578	0.0179	56	56	4.408	379
911 vs. 1624	0.8535	0.937	-0.0835	0.0179	56	56	6.599	379
980 vs. 1056	0.8109	0.87	-0.05912	0.01842	50	56	4.538	379
980 vs. 1300	0.8109	0.9408	-0.13	0.01842	50	56	9.977	379
980 vs. 1552	0.8109	0.9093	-0.09848	0.01842	50	56	7.559	379
980 vs. 1624	0.8109	0.937	-0.1262	0.01842	50	56	9.686	379
1056 vs. 1300	0.87	0.9408	-0.07087	0.0179	56	56	5.6	379
1056 vs. 1552	0.87	0.9093	-0.03936	0.0179	56	56	3.11	379
1056 vs. 1624	0.87	0.937	-0.06707	0.0179	56	56	5.3	379
1300 vs. 1552	0.9408	0.9093	0.03151	0.0179	56	56	2.49	379
1300 vs. 1624	0.9408	0.937	0.003796	0.0179	56	56	0.2999	379
1552 vs. 1624	0.9093	0.937	-0.02772	0.0179	56	56	2.19	379

## Sheet: Total transmission_stats
Number of families	1
Number of comparisons per family	36
Alpha	0.05
Tukey's multiple comparisons test	Mean Diff.	95.00% CI of diff.	Below threshold?	Summary	Adjusted P Value
514 vs. 630	-0.1104	-0.2083 to -0.01254	Yes	*	0.0146	A-B
514 vs. 852	-0.2202	-0.3181 to -0.1223	Yes	****	<0.0001	A-C
514 vs. 911	-0.2072	-0.3051 to -0.1093	Yes	****	<0.0001	A-D
514 vs. 980	-0.2435	-0.3414 to -0.1457	Yes	****	<0.0001	A-E
514 vs. 1056	-0.2452	-0.3431 to -0.1473	Yes	****	<0.0001	A-F
514 vs. 1300	-0.2784	-0.3763 to -0.1805	Yes	****	<0.0001	A-G
514 vs. 1552	-0.2878	-0.3857 to -0.1899	Yes	****	<0.0001	A-H
514 vs. 1624	-0.3249	-0.4228 to -0.2270	Yes	****	<0.0001	A-I
630 vs. 852	-0.1098	-0.2077 to -0.01189	Yes	*	0.0156	B-C
630 vs. 911	-0.09674	-0.1946 to 0.001158	No	ns	0.0555	B-D
630 vs. 980	-0.1331	-0.2310 to -0.03522	Yes	**	0.0011	B-E
630 vs. 1056	-0.1348	-0.2327 to -0.03689	Yes	***	0.0008	B-F
630 vs. 1300	-0.1679	-0.2658 to -0.07004	Yes	****	<0.0001	B-G
630 vs. 1552	-0.1773	-0.2752 to -0.07943	Yes	****	<0.0001	B-H
630 vs. 1624	-0.2144	-0.3123 to -0.1165	Yes	****	<0.0001	B-I
852 vs. 911	0.01305	-0.08485 to 0.1109	No	ns	>0.9999	C-D
852 vs. 980	-0.02333	-0.1212 to 0.07457	No	ns	0.998	C-E
852 vs. 1056	-0.025	-0.1229 to 0.07290	No	ns	0.9967	C-F
852 vs. 1300	-0.05815	-0.1560 to 0.03975	No	ns	0.6378	C-G
852 vs. 1552	-0.06754	-0.1654 to 0.03035	No	ns	0.4314	C-H
852 vs. 1624	-0.1046	-0.2025 to -0.006750	Yes	*	0.0263	C-I
911 vs. 980	-0.03637	-0.1343 to 0.06152	No	ns	0.9622	D-E
911 vs. 1056	-0.03804	-0.1359 to 0.05985	No	ns	0.9509	D-F
911 vs. 1300	-0.0712	-0.1691 to 0.02670	No	ns	0.3571	D-G
911 vs. 1552	-0.08059	-0.1785 to 0.01730	No	ns	0.2001	D-H
911 vs. 1624	-0.1177	-0.2156 to -0.01980	Yes	**	0.0066	D-I
980 vs. 1056	-0.001671	-0.09957 to 0.09623	No	ns	>0.9999	E-F
980 vs. 1300	-0.03482	-0.1327 to 0.06307	No	ns	0.9709	E-G
980 vs. 1552	-0.04422	-0.1421 to 0.05368	No	ns	0.8891	E-H
980 vs. 1624	-0.08132	-0.1792 to 0.01658	No	ns	0.1902	E-I
1056 vs. 1300	-0.03315	-0.1310 to 0.06474	No	ns	0.9785	F-G
1056 vs. 1552	-0.04255	-0.1404 to 0.05535	No	ns	0.9091	F-H
1056 vs. 1624	-0.07965	-0.1775 to 0.01825	No	ns	0.2132	F-I
1300 vs. 1552	-0.009396	-0.1073 to 0.08850	No	ns	>0.9999	G-H
1300 vs. 1624	-0.0465	-0.1444 to 0.05140	No	ns	0.8578	G-I
1552 vs. 1624	-0.0371	-0.1350 to 0.06079	No	ns	0.9575	H-I
Test details	Mean 1	Mean 2	Mean Diff.	SE of diff.	n1	n2	q	DF
514 vs. 630	0.6389	0.7494	-0.1104	0.03116	20	20	5.013	171
514 vs. 852	0.6389	0.8591	-0.2202	0.03116	20	20	9.996	171
514 vs. 911	0.6389	0.8461	-0.2072	0.03116	20	20	9.403	171
514 vs. 980	0.6389	0.8825	-0.2435	0.03116	20	20	11.05	171
514 vs. 1056	0.6389	0.8841	-0.2452	0.03116	20	20	11.13	171
514 vs. 1300	0.6389	0.9173	-0.2784	0.03116	20	20	12.63	171
514 vs. 1552	0.6389	0.9267	-0.2878	0.03116	20	20	13.06	171
514 vs. 1624	0.6389	0.9638	-0.3249	0.03116	20	20	14.75	171
630 vs. 852	0.7494	0.8591	-0.1098	0.03116	20	20	4.983	171
630 vs. 911	0.7494	0.8461	-0.09674	0.03116	20	20	4.391	171
630 vs. 980	0.7494	0.8825	-0.1331	0.03116	20	20	6.042	171
630 vs. 1056	0.7494	0.8841	-0.1348	0.03116	20	20	6.118	171
630 vs. 1300	0.7494	0.9173	-0.1679	0.03116	20	20	7.622	171
630 vs. 1552	0.7494	0.9267	-0.1773	0.03116	20	20	8.049	171
630 vs. 1624	0.7494	0.9638	-0.2144	0.03116	20	20	9.733	171
852 vs. 911	0.8591	0.8461	0.01305	0.03116	20	20	0.5922	171
852 vs. 980	0.8591	0.8825	-0.02333	0.03116	20	20	1.059	171
852 vs. 1056	0.8591	0.8841	-0.025	0.03116	20	20	1.135	171
852 vs. 1300	0.8591	0.9173	-0.05815	0.03116	20	20	2.639	171
852 vs. 1552	0.8591	0.9267	-0.06754	0.03116	20	20	3.066	171
852 vs. 1624	0.8591	0.9638	-0.1046	0.03116	20	20	4.75	171
911 vs. 980	0.8461	0.8825	-0.03637	0.03116	20	20	1.651	171
911 vs. 1056	0.8461	0.8841	-0.03804	0.03116	20	20	1.727	171
911 vs. 1300	0.8461	0.9173	-0.0712	0.03116	20	20	3.231	171
911 vs. 1552	0.8461	0.9267	-0.08059	0.03116	20	20	3.658	171
911 vs. 1624	0.8461	0.9638	-0.1177	0.03116	20	20	5.342	171
980 vs. 1056	0.8825	0.8841	-0.001671	0.03116	20	20	0.07583	171
980 vs. 1300	0.8825	0.9173	-0.03482	0.03116	20	20	1.581	171
980 vs. 1552	0.8825	0.9267	-0.04422	0.03116	20	20	2.007	171
980 vs. 1624	0.8825	0.9638	-0.08132	0.03116	20	20	3.691	171
1056 vs. 1300	0.8841	0.9173	-0.03315	0.03116	20	20	1.505	171
1056 vs. 1552	0.8841	0.9267	-0.04255	0.03116	20	20	1.931	171
1056 vs. 1624	0.8841	0.9638	-0.07965	0.03116	20	20	3.615	171
1300 vs. 1552	0.9173	0.9267	-0.009396	0.03116	20	20	0.4265	171
1300 vs. 1624	0.9173	0.9638	-0.0465	0.03116	20	20	2.111	171
1552 vs. 1624	0.9267	0.9638	-0.0371	0.03116	20	20	1.684	171
