# Supplementary material for: Multiphoton imaging of neural structure and activity in Drosophila through the intact cuticle
Source: eLife. 2022 Jan 24;11:e69094. doi: 10.7554/eLife.69094 (PMC8846588; doi:10.7554/eLife.69094)
Supplement: Figure 3—figure supplement 1—source data 1. [file elife-69094-fig3-figsupp1-data1.xlsx]

## Sheet: Sheet1
Depth	cuticle intact 2P	depth	cuticle intact 3P	depth	cuticle removed 2P	depth	cuticle removed 3P
40	-1.75517	40	-1.72103	80	-2.30762	80	-2.41114
45	-1.96806	45	-1.9534	90	-2.55245	90	-2.68383
50	-2.20715	50	-2.29491	100	-2.76783	100	-3.09549
55	-2.42659	55	-2.64469	110	-3.00281	110	-3.38113
60	-2.6893	60	-3.02588	120	-3.24067	120	-3.6703
65	-2.99757	65	-3.46774	130	-3.51325	130	-3.97842
70	-3.21468	70	-3.83645	140	-3.87149	140	-4.20965
75	-3.43859	75	-4.04039	150	-4.08701	150	-4.47917
80	-3.6262	80	-4.09996	160	-4.52913	160	-4.90741
85	-3.81535	85	-4.28734	170	-4.80321	170	-5.30698
90	-3.97874	90	-4.41587	180	-5.05531	180	-5.55412
95	-4.13568	95	-4.5206	190	-5.16102	190	-5.75696
100	-4.2846	100	-4.8047	200	-5.26662	200	-5.96251
105	-4.38114	105	-5.05797	210	-5.30113	210	-6.31454
110	-4.48763	110	-5.32218	220	-5.44573	220	-6.65826
115	-4.59782	115	-5.56865	230	-5.40899	230	-7.03733
120	-4.68562	120	-5.8441	240	-5.58051	240	-7.33879
125	-4.77695	125	-6.16741	250	-5.61395	250	-7.6284
130	-4.85741	130	-6.38117
135	-4.93134	135	-6.65267
140	-5.00193	140	-6.9027
145	-5.06696	145	-7.13002
150	-5.13839	150	-7.25846
155	-5.18857	155	-7.35577
160	-5.26278	160	-7.4664
165	-5.30953	165	-7.60768
170	-5.37339	170	-7.74799
175	-5.42134	175	-7.87647
180	-5.47774	180	-8.04366
185	-5.51742	185	-8.21334
190	-5.56821	190	-8.31848
195	-5.62848	195	-8.45931
