# Supplementary material for: Multiphoton imaging of neural structure and activity in Drosophila through the intact cuticle
Source: eLife. 2022 Jan 24;11:e69094. doi: 10.7554/eLife.69094 (PMC8846588; doi:10.7554/eLife.69094)
Supplement: Figure 3—figure supplement 2—source data 1. [file elife-69094-fig3-figsupp2-data1.xlsx]

## Sheet: Sheet1
z position	2P beads	z position	3P beads	z position	Cuticle Intact 3P	z position	Cuticle Removed 3P	z position	Cuticle Intact 2P	z position	Cuticle Removed 2P
-4.40106	0.0547246	-4.18279	0.0632679	-21.9893	0.0263762	-20.5583	-0.000479811	-11.8554	0.0963243	-20.0205	-0.0110704
-4.20106	0.0672215	-3.98279	0.0570782	-20.9893	0.00224405	-19.5583	-0.0039852	-10.8554	0.069611	-19.0205	-0.0120743
-4.00106	0.059975	-3.78279	0.0100335	-19.9893	-0.0138507	-18.5583	-0.000616407	-9.85538	0.0585156	-18.0205	-0.0109328
-3.80106	0.0720075	-3.58279	0.0555416	-18.9893	0.119935	-17.5583	0.00418664	-8.85538	0.128718	-17.0205	-0.00816769
-3.60106	0.0932825	-3.38279	-0.0313188	-17.9893	-0.0866628	-16.5583	-0.00768353	-7.85538	0.177192	-16.0205	-0.00725556
-3.40106	0.101574	-3.18279	0.045355	-16.9893	-0.0286883	-15.5583	-0.00841944	-6.85538	0.297157	-15.0205	0.00220991
-3.20106	0.105304	-2.98279	0.0178171	-15.9893	0.0458363	-14.5583	0.00741884	-5.85538	0.377149	-14.0205	0.00972492
-3.00106	0.102574	-2.78279	0.0223924	-14.9893	0.124122	-13.5583	0.00241602	-4.85538	0.609825	-13.0205	0.0175554
-2.80106	0.130316	-2.58279	0.114844	-13.9893	-0.0314301	-12.5583	-0.00679907	-3.85538	0.767578	-12.0205	0.0212326
-2.60106	0.185854	-2.38279	0.187075	-12.9893	-0.0424668	-11.5583	-0.00819235	-2.85538	0.870765	-11.0205	0.0416781
-2.40106	0.183753	-2.18279	0.189865	-11.9893	0.0499145	-10.5583	0.0124302	-1.85538	0.929592	-10.0205	0.0632593
-2.20106	0.200253	-1.98279	0.188479	-10.9893	0.017735	-9.55829	-0.000846912	-0.855382	1.02686	-9.02047	0.0922753
-2.00106	0.247394	-1.78279	0.305235	-9.9893	-0.0051896	-8.55829	0.00610923	0.144618	0.931706	-8.02047	0.135667
-1.80106	0.405479	-1.58279	0.396063	-8.9893	-0.0133755	-7.55829	0.00759983	1.14462	0.955506	-7.02047	0.200428
-1.60106	0.349901	-1.38279	0.534641	-7.9893	0.185739	-6.55829	0.0250858	2.14462	0.872349	-6.02047	0.262464
-1.40106	0.489939	-1.18279	0.540251	-6.9893	0.0756204	-5.55829	0.0839722	3.14462	0.748496	-5.02047	0.341057
-1.20106	0.616113	-0.982786	0.649921	-5.9893	0.278685	-4.55829	0.0705415	4.14462	0.646296	-4.02047	0.463786
-1.00106	0.696708	-0.782786	0.799241	-4.9893	0.205358	-3.55829	0.121454	5.14462	0.572219	-3.02047	0.635961
-0.80106	0.803761	-0.582786	0.841234	-3.9893	0.467624	-2.55829	0.324101	6.14462	0.465837	-2.02047	0.843157
-0.60106	0.9449	-0.382786	0.93372	-2.9893	0.529964	-1.55829	0.718373	7.14462	0.315056	-1.02047	1.00654
-0.40106	0.948806	-0.182786	0.953173	-1.9893	0.827627	-0.55829	0.973385			-0.0204692	1.0393
-0.20106	1.04254	0.0172143	0.983768	-0.989299	0.777739	0.44171	0.951513			0.979531	0.988862
-0.00106022	1.01972	0.217214	0.931983	0.0107015	0.913366	1.44171	0.639374			1.97953	0.876665
0.19894	0.962767	0.417214	0.904661	1.0107	1.13001	2.44171	0.467052			2.97953	0.667667
0.39894	0.892561	0.617214	0.854565	2.0107	0.784559	3.44171	0.229344			3.97953	0.467406
0.59894	0.834589	0.817214	0.861444	3.0107	0.512137	4.44171	0.137489			4.97953	0.331918
0.79894	0.727813	1.01721	0.707379	4.0107	0.413876	5.44171	0.0544197			5.97953	0.250773
0.99894	0.666382	1.21721	0.566738	5.0107	0.142969	6.44171	0.0263237			6.97953	0.174912
1.19894	0.581124	1.41721	0.350046	6.0107	0.0128254	7.44171	0.0277631			7.97953	0.134078
1.39894	0.506694	1.61721	0.262952	7.0107	0.0732151	8.44171	0.0162668			8.97953	0.102785
1.59894	0.479723	1.81721	0.278177	8.0107	0.0905669	9.44171	0.0125446			9.97953	0.0825574
1.79894	0.398484	2.01721	0.188003	9.0107	0.00566887	10.4417	0.000887855			10.9795	0.0605918
1.99894	0.364817	2.21721	0.173431	10.0107	0.0161809	11.4417	0.00599654			11.9795	0.0381558
2.19894	0.285855	2.41721	0.097594	11.0107	-0.0512664	12.4417	-0.00439328			12.9795	0.0309849
2.39894	0.262393	2.61721	0.168429			13.4417	-0.00175698			13.9795	0.026757
2.59894	0.227385	2.81721	0.12848			14.4417	0.00366075			14.9795	0.0196551
2.79894	0.174151	3.01721	0.108586			15.4417	-0.00876093			15.9795	0.00350066
2.99894	0.132646	3.21721	0.0929865			16.4417	-0.0020831			16.9795	0.00208944
3.19894	0.151685	3.41721	0.10089			17.4417	0.0108628			17.9795	-0.00384799
3.39894	0.119707					18.4417	-0.00645929			18.9795	-0.00442165
3.59894	0.0998249					19.4417	0.00199599			19.9795	-0.0107205
3.79894	0.0901143					20.4417	-0.0038469			20.9795	-0.011254
3.99894	0.0614693
4.19894	0.0490286
4.39894	0.0357191
4.59894	0.0323711
4.79894	-0.00174152
4.99894	-0.00017988
5.19894	0.0136839
5.39894	-0.00017239
5.59894	-0.0201254
5.79894	-0.0132984
