# Supplementary material for: Multiphoton imaging of neural structure and activity in Drosophila through the intact cuticle
Source: eLife. 2022 Jan 24;11:e69094. doi: 10.7554/eLife.69094 (PMC8846588; doi:10.7554/eLife.69094)
Supplement: Figure 3—figure supplement 3—source data 1. [file elife-69094-fig3-figsupp3-data1.xlsx]

## Sheet: Sheet1
z position	2P beads	z position	3P beads	z position	Cuticle Intact 3P	z position	Cuticle Removed 3P	z position	Cuticle Intact 2P	z position	Cuticle Removed 2P
-4.40106	0.0547246	-4.18279	0.0632679	-14.6231	0.0318006	-20.7299	0.0121084	-13.4573	-0.0612567	-6.92874	0.0792394
-4.20106	0.0672215	-3.98279	0.0570782	-13.6231	0.017352	-19.7299	0.00356498	-12.4573	-0.00944641	-5.92874	0.115126
-4.00106	0.059975	-3.78279	0.0100335	-12.6231	0.0290085	-18.7299	0.0072991	-11.4573	0.0241063	-4.92874	0.193732
-3.80106	0.0720075	-3.58279	0.0555416	-11.6231	0.0357555	-17.7299	0.000422651	-10.4573	0.0270786	-3.92874	0.371868
-3.60106	0.0932825	-3.38279	-0.0313188	-10.6231	0.0214402	-16.7299	-0.00236349	-9.45727	0.0231877	-2.92874	0.536465
-3.40106	0.101574	-3.18279	0.045355	-9.62313	0.0781056	-15.7299	0.0120746	-8.45727	0.076611	-1.92874	0.764972
-3.20106	0.105304	-2.98279	0.0178171	-8.62313	0.0652741	-14.7299	0.0014951	-7.45727	0.219069	-0.928742	0.996906
-3.00106	0.102574	-2.78279	0.0223924	-7.62313	0.0843475	-13.7299	-0.00398883	-6.45727	0.345678	0.0712582	1.00776
-2.80106	0.130316	-2.58279	0.114844	-6.62313	0.149383	-12.7299	-0.00433113	-5.45727	0.502655	1.07126	0.90893
-2.60106	0.185854	-2.38279	0.187075	-5.62313	0.203655	-11.7299	-0.00190728	-4.45727	0.640646	2.07126	0.777193
-2.40106	0.183753	-2.18279	0.189865	-4.62313	0.283511	-10.7299	0.000449324	-3.45727	0.797124	3.07126	0.513176
-2.20106	0.200253	-1.98279	0.188479	-3.62313	0.434893	-9.72994	0.000711045	-2.45727	0.94691	4.07126	0.286081
-2.00106	0.247394	-1.78279	0.305235	-2.62313	0.629579	-8.72994	0.0239598	-1.45727	1.01915	5.07126	0.202705
-1.80106	0.405479	-1.58279	0.396063	-1.62313	0.854411	-7.72994	0.0317365	-0.457271	1.01486	6.07126	0.152795
-1.60106	0.349901	-1.38279	0.534641	-0.623126	0.982035	-6.72994	0.0481594	0.542729	0.974735	7.07126	0.106129
-1.40106	0.489939	-1.18279	0.540251	0.376874	0.996027	-5.72994	0.115696	1.54273	0.918068	8.07126	0.074365
-1.20106	0.616113	-0.982786	0.649921	1.37687	0.874425	-4.72994	0.122741	2.54273	0.796722	9.07126	0.0563232
-1.00106	0.696708	-0.782786	0.799241	2.37687	0.704193	-3.72994	0.227317	3.54273	0.646842	10.0713	0.0439384
-0.80106	0.803761	-0.582786	0.841234	3.37687	0.475494	-2.72994	0.372811	4.54273	0.534366	11.0713	0.0476539
-0.60106	0.9449	-0.382786	0.93372	4.37687	0.306442	-1.72994	0.623773	5.54273	0.471001	12.0713	0.0423747
-0.40106	0.948806	-0.182786	0.953173	5.37687	0.243198	-0.729941	0.847964	6.54273	0.397569	13.0713	0.0371371
-0.20106	1.04254	0.0172143	0.983768	6.37687	0.164331	0.270059	0.993402	7.54273	0.352081	14.0713	0.0230289
-0.00106022	1.01972	0.217214	0.931983	7.37687	0.116604	1.27006	0.919779	8.54273	0.27414	15.0713	0.010486
0.19894	0.962767	0.417214	0.904661	8.37687	0.04004	2.27006	0.280178	9.54273	0.233032	16.0713	0.000736454
0.39894	0.892561	0.617214	0.854565	9.37687	0.0605318	3.27006	0.323225	10.5427	0.145041	17.0713	-0.00491068
0.59894	0.834589	0.817214	0.861444	10.3769	0.0175785	4.27006	0.0641428	11.5427	0.0974765	18.0713	-0.00980538
0.79894	0.727813	1.01721	0.707379	11.3769	0.0122778	5.27006	0.023797	12.5427	0.062296	19.0713	-0.0127364
0.99894	0.666382	1.21721	0.566738	12.3769	0.00265146	6.27006	0.0248723	13.5427	0.0334247	20.0713	-0.0134542
1.19894	0.581124	1.41721	0.350046	13.3769	0.000995585	7.27006	-0.00132938	14.5427	0.012968
1.39894	0.506694	1.61721	0.262952	14.3769	0.0142619	8.27006	-0.00104821	15.5427	-0.0308389
1.59894	0.479723	1.81721	0.278177	15.3769	0.0208527	9.27006	4.36825e-05
1.79894	0.398484	2.01721	0.188003	16.3769	0.00221054	10.2701	-0.00539858
1.99894	0.364817	2.21721	0.173431	17.3769	0.0134564	11.2701	-0.000904851
2.19894	0.285855	2.41721	0.097594	18.3769	-0.000499179	12.2701	-0.00381435
2.39894	0.262393	2.61721	0.168429	19.3769	0.0248924	13.2701	-0.00706837
2.59894	0.227385	2.81721	0.12848	20.3769	0.0115643	14.2701	-0.0078741
2.79894	0.174151	3.01721	0.108586			15.2701	-0.00630155
2.99894	0.132646	3.21721	0.0929865			16.2701	-0.00750235
3.19894	0.151685	3.41721	0.10089			17.2701	-0.00803636
3.39894	0.119707					18.2701	-0.00942943
3.59894	0.0998249					19.2701	-0.00536468
3.79894	0.0901143					20.2701	-0.00732565
3.99894	0.0614693
4.19894	0.0490286
4.39894	0.0357191
4.59894	0.0323711
4.79894	-0.00174152
4.99894	-0.00017988
5.19894	0.0136839
5.39894	-0.00017239
5.59894	-0.0201254
5.79894	-0.0132984
