# Supplementary material for: Multiphoton imaging of neural structure and activity in Drosophila through the intact cuticle
Source: eLife. 2022 Jan 24;11:e69094. doi: 10.7554/eLife.69094 (PMC8846588; doi:10.7554/eLife.69094)
Supplement: Figure 3—figure supplement 4—source data 1. [file elife-69094-fig3-figsupp4-data1.xlsx]

## Sheet: Sheet1
time	distance	time	Intensity change
1	0	1	0.166266
1.15225	0.199306	1.15225	0.143755
1.30449	0.523265	1.30449	0.103391
1.45674	0.388322	1.45674	0.0730039
1.60899	0.276938	1.60899	0.0883123
1.76123	0.367977	1.76123	0.0767465
1.91348	0.307838	1.91348	-0.0654301
2.06573	0.544891	2.06573	0.0487063
2.21797	0.598768	2.21797	0.0818353
2.37022	0.519863	2.37022	0.0644597
2.52247	0.207619	2.52247	0.0281315
2.67471	0.423381	2.67471	0.0788683
2.82696	0.687449	2.82696	-0.0300493
2.97921	0.965978	2.97921	-0.212155
3.13145	0.564645	3.13145	-0.263918
3.2837	1.20624	3.2837	0.00928358
3.43595	0.789114	3.43595	0.0171975
3.58819	0.689969	3.58819	0.0646239
3.74044	1.12825	3.74044	-0.0250575
3.89268	0.652375	3.89268	-0.113089
4.04493	0.620351	4.04493	-0.0250057
4.19718	0.93848	4.19718	-0.0686274
4.34942	1.07682	4.34942	-0.0808648
4.50167	1.03747	4.50167	-0.084048
4.65392	0.531919	4.65392	-0.0725973
4.80616	0.871487	4.80616	-0.0831181
4.95841	0.810086	4.95841	-0.109577
5.11066	0.974107	5.11066	-0.356444
5.2629	1.40001	5.2629	-0.0721639
5.41515	1.23954	5.41515	-0.302863
5.5674	1.22206	5.5674	-0.25092
5.71964	1.53572	5.71964	-0.0582538
5.87189	1.27392	5.87189	-0.0469349
6.02414	1.17674	6.02414	-0.223391
6.17638	1.61653	6.17638	-0.0617245
6.32863	1.53993	6.32863	-0.2695
6.48088	1.52812	6.48088	-0.194771
6.63312	1.37931	6.63312	-0.267216
6.78537	1.6807	6.78537	-0.065853
6.93762	1.64143	6.93762	-0.322365
7.08986	1.32446	7.08986	-0.209415
7.24211	1.77098	7.24211	-0.401532
7.39436	1.5097	7.39436	-0.355891
7.5466	1.5073	7.5466	-0.222978
7.69885	2.09271	7.69885	-0.278809
7.8511	1.69063	7.8511	-0.40023
8.00334	1.72885	8.00334	-0.468407
8.15559	1.90461	8.15559	-0.297605
8.30784	1.54529	8.30784	-0.443677
8.46008	1.33577	8.46008	-0.416927
8.61233	1.65977	8.61233	-0.186233
8.76457	1.56808	8.76457	-0.381251
8.91682	1.68982	8.91682	-0.321072
9.06907	1.84308	9.06907	-0.238559
9.22131	1.96343	9.22131	-0.376973
9.37356	1.8544	9.37356	-0.319517
9.52581	1.57963	9.52581	-0.325351
9.67805	1.49284	9.67805	-0.315283
9.8303	1.70901	9.8303	-0.351282
9.98255	1.70591	9.98255	-0.380939
10.1348	2.13096	10.1348	-0.342558
10.287	1.82713	10.287	-0.578487
10.4393	1.78045	10.4393	-0.532096
10.5915	1.98308	10.5915	-0.00687159
10.7438	1.517	10.7438	-0.383194
10.896	1.66806	10.896	-0.298607
11.0483	2.16525	11.0483	-0.223898
11.2005	1.85722	11.2005	-0.337601
11.3528	1.3084	11.3528	-0.41323
11.505	1.38785	11.505	-0.196689
11.6573	1.14223	11.6573	-0.337036
11.8095	1.16743	11.8095	-0.3797
11.9618	1.41734	11.9618	-0.270647
12.114	1.36838	12.114	-0.354031
12.2662	1.17865	12.2662	-0.0936403
12.4185	0.761908	12.4185	0.0274153
12.5707	0.874363	12.5707	-0.118203
12.723	0.632203	12.723	-0.11461
12.8752	0.584493	12.8752	0.0417911
13.0275	0.925802	13.0275	-0.0242319
13.1797	0.729256	13.1797	-0.0255031
13.332	0.958064	13.332	-0.0881581
13.4842	0.877508	13.4842	-0.262837
13.6365	0.765199	13.6365	-0.0563005
13.7887	1.07498	13.7887	-0.0788931
13.941	0.776577	13.941	-0.0810372
14.0932	0.723307	14.0932	0.0166049
14.2455	0.688693	14.2455	-0.238564
14.3977	1.12333	14.3977	0.0464947
14.5499	0.731507	14.5499	-0.121725
14.7022	0.670754	14.7022	-0.322466
14.8544	1.174	14.8544	-0.0174472
15.0067	0.472826	15.0067	-0.0192437
15.1589	0.181892	15.1589	-0.0148997
15.3112	0.728923	15.3112	0.048441
15.4634	0.583507	15.4634	0.0888799
15.6157	0.726528	15.6157	-0.0608883
15.7679	0.832799	15.7679	0.069402
15.9202	0.797898	15.9202	-0.0320831
16.0724	0.709324	16.0724	-0.124607
16.2247	0.739184	16.2247	-0.249981
16.3769	0.690424	16.3769	0.0556782
16.5291	0.698436	16.5291	-0.193921
16.6814	0.43521	16.6814	-0.0199093
16.8336	0.625695	16.8336	-0.112172
16.9859	0.0933909	16.9859	-0.198221
17.1381	0.238054	17.1381	-0.0677095
17.2904	0.918991	17.2904	0.0622435
17.4426	0.691449	17.4426	-0.104728
17.5949	0.371741	17.5949	-0.0444224
17.7471	0.585477	17.7471	-0.0371466
17.8994	0.310998	17.8994	-0.134433
18.0516	0.376263	18.0516	-0.194601
18.2039	0.740859	18.2039	-0.0692396
18.3561	0.586297	18.3561	-0.0903866
18.5084	0.463606	18.5084	-0.178052
18.6606	0.179982	18.6606	0.020491
18.8128	0.291755	18.8128	0.108109
18.9651	0.296893	18.9651	-0.0230186
19.1173	0.397398	19.1173	-0.144211
19.2696	0.391095	19.2696	-0.237588
19.4218	0.488984	19.4218	-0.0715125
19.5741	0.592315	19.5741	0.0287238
19.7263	0.0470652	19.7263	-0.280176
19.8786	0.178876	19.8786	-0.0540783
20.0308	0.154531	20.0308	-0.257578
20.1831	0.44988	20.1831	-0.181137
20.3353	0.569322	20.3353	0.0423671
20.4876	0.519665	20.4876	0.0324375
20.6398	0.479089	20.6398	-0.111553
20.7921	0.507957	20.7921	0.12855
20.9443	0.409581	20.9443	-0.253913
21.0965	0.739513	21.0965	-0.0505096
21.2488	0.265868	21.2488	-0.232284
21.401	0.0992571	21.401	-0.249318
21.5533	0.213964	21.5533	-0.243056
21.7055	0.294739	21.7055	-0.0348804
21.8578	0.479004	21.8578	0.0655533
22.01	0.265206	22.01	-0.199803
22.1623	0.411898	22.1623	-0.021276
22.3145	0.501783	22.3145	-0.0904035
22.4668	0.503058	22.4668	-0.145365
22.619	0.116843	22.619	-0.235997
22.7713	0.269459	22.7713	-0.0328952
22.9235	0.341296	22.9235	-0.0132756
23.0758	0.323431	23.0758	-0.0407346
23.228	0.7577	23.228	0.00487899
23.3802	0.886489	23.3802	0.0318425
23.5325	0.973748	23.5325	-0.165875
23.6847	1.04088	23.6847	-0.0186776
23.837	1.45704	23.837	-0.0507221
23.9892	1.18812	23.9892	-0.135576
24.1415	0.860857	24.1415	-0.0738447
24.2937	1.27636	24.2937	-0.00125553
24.446	1.31892	24.446	0.007673
24.5982	1.07644	24.5982	0.0408711
24.7505	1.44168	24.7505	0.107557
24.9027	1.58407	24.9027	-0.0802185
25.055	1.29467	25.055	-0.0183253
25.2072	1.63737	25.2072	0.104632
25.3595	1.30961	25.3595	-0.169476
25.5117	1.26336	25.5117	-0.0493771
25.6639	1.50133	25.6639	-0.199371
25.8162	1.90385	25.8162	-0.374481
25.9684	1.19597	25.9684	-0.26453
26.1207	1.35748	26.1207	-0.161628
26.2729	1.54394	26.2729	-0.0899206
26.4252	1.41503	26.4252	-0.234886
26.5774	1.41869	26.5774	-0.17073
26.7297	1.35917	26.7297	-0.0346598
26.8819	1.47559	26.8819	-0.20553
27.0342	1.5757	27.0342	-0.103986
27.1864	1.90237	27.1864	-0.120221
27.3387	1.43713	27.3387	-0.133755
27.4909	1.64918	27.4909	-0.330396
27.6431	1.64585	27.6431	-0.164712
27.7954	1.89996	27.7954	-0.327787
27.9476	2.12295	27.9476	-0.20517
28.0999	1.91321	28.0999	-0.249525
28.2521	1.53488	28.2521	-0.276261
28.4044	1.339	28.4044	-0.345451
28.5566	1.42155	28.5566	-0.300492
28.7089	1.24705	28.7089	-0.334363
28.8611	1.34757	28.8611	-0.390369
29.0134	1.84574	29.0134	-0.205781
29.1656	1.68199	29.1656	-0.509485
29.3179	1.5238	29.3179	-0.279801
29.4701	2.02332	29.4701	-0.282272
29.6224	1.85498	29.6224	-0.35893
29.7746	1.57352	29.7746	-0.266421
29.9268	2.10244	29.9268	-0.252565
30.0791	1.88495	30.0791	-0.41528
30.2313	1.77188	30.2313	-0.491241
30.3836	2.2645	30.3836	-0.347326
30.5358	1.62711	30.5358	-0.343372
30.6881	0.979132	30.6881	-0.573566
30.8403	1.49573	30.8403	-0.333744
30.9926	1.27711	30.9926	-0.238316
31.1448	1.12343	31.1448	-0.357561
31.2971	1.42673	31.2971	-0.265059
31.4493	0.807739	31.4493	-0.243979
31.6016	0.952325	31.6016	-0.259779
31.7538	1.0896	31.7538	-0.302926
31.9061	0.94008	31.9061	-0.285511
32.0583	0.667637	32.0583	-0.424663
32.2105	0.994204	32.2105	-0.204822
32.3628	0.705291	32.3628	-0.35586
32.515	0.705822	32.515	-0.194233
32.6673	1.15942	32.6673	-0.058523
32.8195	0.761149	32.8195	-0.228008
32.9718	0.692078	32.9718	-0.136739
33.124	1.21741	33.124	-0.054683
33.2763	1.02403	33.2763	-0.0633025
33.4285	1.12278	33.4285	-0.137624
33.5808	1.27422	33.5808	-0.409962
33.733	1.3967	33.733	-0.137691
33.8853	1.5095	33.8853	-0.250101
34.0375	1.88837	34.0375	-0.337505
34.1898	1.83359	34.1898	-0.0517
34.342	1.41248	34.342	-0.198009
34.4942	1.50175	34.4942	-0.269633
34.6465	0.77009	34.6465	-0.273086
34.7987	1.75152	34.7987	-0.219493
34.951	2.44334	34.951	-0.385202
35.1032	2.63213	35.1032	-0.375939
35.2555	0.763073	35.2555	-0.205901
35.4077	1.15541	35.4077	0.0350642
35.56	1.54457	35.56	-0.192264
35.7122	1.6714	35.7122	-0.0911438
35.8645	1.54146	35.8645	0.0607448
36.0167	1.63115	36.0167	-0.19989
36.169	1.53778	36.169	-0.169138
36.3212	1.53008	36.3212	-0.00967012
36.4735	0.911988	36.4735	0.152192
36.6257	0.780651	36.6257	0.0697812
36.7779	0.401384	36.7779	-0.212959
36.9302	0.356304	36.9302	-0.0247784
37.0824	0.820445	37.0824	-0.030846
37.2347	0.641408	37.2347	-0.0825309
37.3869	0.578993	37.3869	-0.023793
37.5392	0.71052	37.5392	0.0194001
37.6914	0.965306	37.6914	0.0678017
37.8437	1.11254	37.8437	-0.0767837
37.9959	1.31481	37.9959	-0.0080276
38.1482	1.45871	38.1482	-0.169998
38.3004	1.43954	38.3004	-0.0562776
38.4527	1.3139	38.4527	-0.121557
38.6049	1.20888	38.6049	0.0275805
38.7571	1.34509	38.7571	-0.0613553
38.9094	1.34275	38.9094	-0.219942
39.0616	1.63781	39.0616	0.0737906
39.2139	1.29803	39.2139	-0.0860549
39.3661	1.17189	39.3661	-0.0733895
39.5184	1.77646	39.5184	0.0617962
39.6706	1.19055	39.6706	-0.0975556
39.8229	1.41776	39.8229	0.02262
39.9751	1.76641	39.9751	0.0196213
40.1274	1.8114	40.1274	0.0207828
40.2796	1.71883	40.2796	-0.118743
40.4319	2.17207	40.4319	-0.0212136
40.5841	2.198	40.5841	-0.0988256
40.7364	1.65117	40.7364	-0.250185
40.8886	1.86775	40.8886	-0.110863
41.0408	1.86557	41.0408	-0.241018
41.1931	1.7852	41.1931	0.00577697
41.3453	1.76837	41.3453	-0.239278
41.4976	1.4202	41.4976	-0.301976
41.6498	1.19544	41.6498	-0.319121
41.8021	1.83582	41.8021	-0.221449
41.9543	1.64908	41.9543	-0.156086
42.1066	1.8327	42.1066	-0.265981
42.2588	2.15546	42.2588	-0.154696
42.4111	1.78235	42.4111	-0.299687
42.5633	1.77283	42.5633	-0.329957
42.7156	2.00249	42.7156	-0.0696418
42.8678	1.97145	42.8678	-0.201812
43.0201	1.88055	43.0201	-0.203845
43.1723	1.15855	43.1723	-0.081648
43.3245	1.54815	43.3245	-0.058482
43.4768	1.08612	43.4768	-0.110143
43.629	1.16824	43.629	0.131602
43.7813	1.60024	43.7813	0.00154752
43.9335	0.925505	43.9335	-0.0908553
44.0858	0.918707	44.0858	-0.175346
44.238	1.28134	44.238	0.106518
44.3903	1.1415	44.3903	-0.0112264
44.5425	1.00064	44.5425	-0.0826343
44.6948	1.1207	44.6948	0.109153
44.847	0.820574	44.847	-0.0622225
44.9993	0.835766	44.9993	-0.0104053
45.1515	0.809486	45.1515	0.0039575
45.3038	1.03351	45.3038	0.136023
45.456	0.906581	45.456	-0.146314
45.6082	0.911357	45.6082	0.0703793
45.7605	0.707103	45.7605	0.401851
45.9127	0.605589	45.9127	0.20486
46.065	0.458789	46.065	-0.0890615
46.2172	1.0733	46.2172	0.0026143
46.3695	0.780621	46.3695	0.0209763
46.5217	0.80963	46.5217	-0.0358541
46.674	1.10684	46.674	0.226307
46.8262	1.013	46.8262	0.245396
46.9785	1.09623	46.9785	0.0851713
47.1307	0.998395	47.1307	0.0547968
47.283	1.02567	47.283	-0.0116882
47.4352	1.13204	47.4352	0.135292
47.5874	1.01499	47.5874	-0.0411777
47.7397	1.03292	47.7397	0.291316
47.8919	0.976591	47.8919	0.14796
48.0442	1.08653	48.0442	0.0844066
48.1964	1.21163	48.1964	-0.038274
48.3487	1.2065	48.3487	0.182085
48.5009	1.21071	48.5009	0.0564469
48.6532	1.44058	48.6532	0.172737
48.8054	1.32349	48.8054	0.0524351
48.9577	1.16089	48.9577	-0.0883829
49.1099	1.12956	49.1099	0.21995
49.2622	1.12004	49.2622	0.102133
49.4144	0.896926	49.4144	0.0362003
49.5667	0.73097	49.5667	0.124087
49.7189	0.590682	49.7189	0.201049
49.8711	0.565947	49.8711	0.0285511
50.0234	0.878461	50.0234	0.336508
50.1756	0.918127	50.1756	0.307799
50.3279	0.763429	50.3279	0.197991
50.4801	1.14997	50.4801	-0.0108011
50.6324	1.08952	50.6324	-0.208085
50.7846	0.895285	50.7846	-0.016309
50.9369	0.729652	50.9369	-0.0569832
51.0891	0.531648	51.0891	-0.0711405
51.2414	0.768293	51.2414	-0.0773302
51.3936	1.08472	51.3936	0.127446
51.5459	1.07662	51.5459	-0.00633926
51.6981	1.31089	51.6981	-0.200574
51.8504	1.30231	51.8504	-0.0111393
52.0026	0.755329	52.0026	0.10295
52.1548	0.486216	52.1548	0.00412811
52.3071	0.745954	52.3071	0.0475232
52.4593	1.06982	52.4593	0.0506503
52.6116	1.06772	52.6116	-0.00471723
52.7638	1.2409	52.7638	0.00813239
52.9161	1.39919	52.9161	-0.0300611
53.0683	1.37143	53.0683	0.248727
53.2206	0.827524	53.2206	-0.0838524
53.3728	0.831741	53.3728	-0.0357251
53.5251	0.754702	53.5251	0.250516
53.6773	0.949491	53.6773	0.169482
53.8296	1.16734	53.8296	0.0580412
53.9818	0.955908	53.9818	0.0400554
54.1341	1.12694	54.1341	-0.0175096
54.2863	1.17061	54.2863	0.0313719
54.4385	1.11819	54.4385	0.208056
54.5908	0.855535	54.5908	-0.111748
54.743	1.25037	54.743	0.116367
54.8953	1.08789	54.8953	0.0128824
55.0475	0.979688	55.0475	-0.00720739
55.1998	0.839628	55.1998	0.049109
55.352	0.802316	55.352	0.0208738
55.5043	0.756294	55.5043	-0.103856
55.6565	1.00677	55.6565	0.0777925
55.8088	0.777656	55.8088	-0.0341847
55.961	0.801958	55.961	0.0939443
56.1133	0.763596	56.1133	0.00890678
56.2655	0.663866	56.2655	0.146649
56.4178	0.662	56.4178	0.258727
56.57	0.564629	56.57	0.171407
56.7222	0.286206	56.7222	0.306262
56.8745	0.226404	56.8745	-0.258076
57.0267	0.337542	57.0267	0.0660175
57.179	0.711945	57.179	-0.194261
57.3312	0.438597	57.3312	0.236809
57.4835	0.23698	57.4835	-0.00755555
57.6357	0.540883	57.6357	-0.134128
57.788	0.434286	57.788	0.0402791
57.9402	0.649397	57.9402	-0.0638551
58.0925	1.05037	58.0925	-0.000869395
58.2447	0.870013	58.2447	0.0596017
58.397	0.894346	58.397	-0.0694717
58.5492	1.50674	58.5492	-0.0773875
58.7014	1.18775	58.7014	-0.102092
58.8537	1.16817	58.8537	-0.0333588
59.0059	1.68833	59.0059	-0.148992
59.1582	1.48585	59.1582	-0.235987
59.3104	1.47876	59.3104	0.0470813
59.4627	1.79424	59.4627	-0.0746525
59.6149	1.66573	59.6149	-0.238334
59.7672	1.34593	59.7672	-0.335987
59.9194	2.10082	59.9194	-0.0262992
60.0717	1.62169	60.0717	-0.0806556
60.2239	1.45564	60.2239	-0.279322
60.3762	1.67716	60.3762	-0.21004
60.5284	1.38883	60.5284	-0.229989
60.6807	1.24569	60.6807	-0.19485
60.8329	1.52691	60.8329	-0.136514
60.9851	1.06609	60.9851	-0.402309
61.1374	1.16375	61.1374	-0.336833
61.2896	1.51411	61.2896	-0.15538
61.4419	1.55105	61.4419	-0.182407
61.5941	1.62652	61.5941	-0.521493
61.7464	1.2999	61.7464	-0.224287
61.8986	1.51152	61.8986	-0.320858
62.0509	1.42401	62.0509	-0.325521
62.2031	1.5757	62.2031	-0.360797
62.3554	1.88931	62.3554	-0.254337
62.5076	0.921168	62.5076	-0.240721
62.6599	1.16567	62.6599	-0.272806
62.8121	1.53076	62.8121	-0.432097
62.9644	1.31701	62.9644	-0.198625
63.1166	1.50685	63.1166	-0.028534
63.2688	1.95441	63.2688	-0.247139
63.4211	1.63691	63.4211	-0.443981
63.5733	1.68328	63.5733	-0.498938
63.7256	2.01249	63.7256	-0.374083
63.8778	1.65529	63.8778	-0.420655
64.0301	1.41894	64.0301	-0.43369
64.1823	1.98926	64.1823	-0.17895
64.3346	1.78159	64.3346	-0.155817
64.4868	1.604	64.4868	-0.370086
64.6391	1.93235	64.6391	-0.280908
64.7913	1.56325	64.7913	-0.297565
64.9436	1.00986	64.9436	-0.327851
65.0958	1.18518	65.0958	-0.226239
65.2481	1.0439	65.2481	-0.278193
65.4003	1.01917	65.4003	-0.353896
65.5525	1.50654	65.5525	-0.268424
65.7048	0.800322	65.7048	-0.119152
65.857	0.502948	65.857	-0.176756
66.0093	1.26544	66.0093	0.279058
66.1615	1.01658	66.1615	-0.192355
66.3138	0.996552	66.3138	-0.266556
66.466	1.62718	66.466	-0.0281123
66.6183	0.968848	66.6183	-0.0844507
66.7705	0.822647	66.7705	-0.024848
66.9228	1.02391	66.9228	0.0791369
67.075	1.28872	67.075	-0.0516285
67.2273	1.45441	67.2273	-0.153016
67.3795	1.56617	67.3795	-0.109292
67.5317	1.38377	67.5317	-0.00693218
67.684	0.894539	67.684	-0.108405
67.8362	0.596517	67.8362	0.0721312
67.9885	0.720598	67.9885	0.120828
68.1407	0.60772	68.1407	0.0892374
68.293	0.813807	68.293	-0.120936
68.4452	0.637407	68.4452	-0.0211931
68.5975	0.902716	68.5975	-0.103726
68.7497	0.875195	68.7497	0.0276181
68.902	0.88326	68.902	-0.294518
69.0542	0.944944	69.0542	-0.241518
69.2065	1.26578	69.2065	0.00855892
69.3587	0.662936	69.3587	-0.123131
69.511	0.298099	69.511	-0.0270413
69.6632	0.251325	69.6632	-0.138118
69.8154	0.527451	69.8154	-0.114613
69.9677	0.620878	69.9677	-0.123643
70.1199	0.555052	70.1199	0.0109819
70.2722	0.754286	70.2722	-0.164462
70.4244	0.586333	70.4244	-0.0343502
70.5767	0.739294	70.5767	0.102121
70.7289	0.557588	70.7289	-0.0856049
70.8812	0.370681	70.8812	-0.160373
71.0334	0.789332	71.0334	-0.0812009
71.1857	1.4093	71.1857	-0.0116038
71.3379	1.45549	71.3379	0.0756963
71.4902	1.23071	71.4902	-0.0651708
71.6424	1.13211	71.6424	0.00207172
71.7947	1.15416	71.7947	-0.0961106
71.9469	1.02625	71.9469	-0.0100903
72.0991	1.08187	72.0991	-0.0618517
72.2514	0.692843	72.2514	-0.0695139
72.4036	0.753073	72.4036	-0.0696677
72.5559	0.641189	72.5559	0.0346359
72.7081	0.803759	72.7081	0.152271
72.8604	0.961443	72.8604	0.101308
73.0126	0.763636	73.0126	-0.0164612
73.1649	0.859433	73.1649	-0.182427
73.3171	0.974469	73.3171	-0.00421443
73.4694	0.67123	73.4694	-0.141991
73.6216	0.735841	73.6216	0.0513984
73.7739	0.66846	73.7739	-0.107945
73.9261	0.429937	73.9261	-0.0376307
74.0784	0.675432	74.0784	-0.170961
74.2306	0.983869	74.2306	-0.0732111
74.3828	1.03942	74.3828	-0.126874
74.5351	0.993387	74.5351	-0.0762746
74.6873	0.820695	74.6873	-0.101425
74.8396	0.540432	74.8396	-0.0859344
74.9918	0.351839	74.9918	-0.0980976
75.1441	0.593462	75.1441	-0.0585709
75.2963	0.785591	75.2963	0.10647
75.4486	1.0096	75.4486	0.193268
75.6008	1.27881	75.6008	0.0633905
75.7531	1.11399	75.7531	0.0356502
75.9053	1.15538	75.9053	0.0123483
76.0576	0.999939	76.0576	-0.121794
76.2098	1.04921	76.2098	0.0797214
76.3621	1.05865	76.3621	-0.035555
76.5143	1.03083	76.5143	0.129005
76.6665	1.045	76.6665	0.164682
76.8188	1.0274	76.8188	0.0707443
76.971	1.19976	76.971	0.0602206
77.1233	1.04576	77.1233	-0.186777
77.2755	1.01556	77.2755	-0.120598
77.4278	1.66483	77.4278	-0.145727
77.58	1.06982	77.58	0.000810207
77.7323	0.931258	77.7323	-0.220854
77.8845	0.855487	77.8845	-0.173586
78.0368	0.722151	78.0368	0.138066
78.189	0.549605	78.189	0.0551836
78.3413	0.436032	78.3413	-0.0136988
78.4935	0.793222	78.4935	0.238617
78.6457	0.548107	78.6457	0.0439777
78.798	0.668108	78.798	-0.102414
78.9502	0.814538	78.9502	0.28105
79.1025	0.777177	79.1025	0.0514455
79.2547	0.686734	79.2547	0.0291823
79.407	0.339884	79.407	-0.345073
79.5592	0.794196	79.5592	-0.331392
79.7115	0.533403	79.7115	0.0207276
79.8637	0.420164	79.8637	-0.166919
80.016	0.505752	80.016	-0.233239
80.1682	1.1198	80.1682	-0.330205
80.3205	1.32095	80.3205	-0.290349
80.4727	1.40325	80.4727	-0.33158
80.625	1.14898	80.625	-0.147076
80.7772	0.918775	80.7772	-0.236525
80.9294	0.89864	80.9294	-0.0845864
81.0817	0.989921	81.0817	-0.24558
81.2339	0.444338	81.2339	-0.238835
81.3862	1.00641	81.3862	-0.0712849
81.5384	0.983939	81.5384	-0.224702
81.6907	1.14599	81.6907	-0.154392
81.8429	1.11828	81.8429	-0.222795
81.9952	1.15252	81.9952	-0.124696
82.1474	0.920256	82.1474	-0.157635
82.2997	1.3146	82.2997	-0.206726
82.4519	1.23201	82.4519	-0.087541
82.6042	1.34048	82.6042	-0.328967
82.7564	1.64187	82.7564	-0.376934
82.9087	1.74124	82.9087	-0.154259
83.0609	1.31832	83.0609	-0.16611
83.2131	1.32411	83.2131	-0.245702
83.3654	1.63146	83.3654	-0.180147
83.5176	1.59406	83.5176	-0.293914
83.6699	1.66986	83.6699	-0.335285
83.8221	1.90359	83.8221	-0.298292
83.9744	1.59893	83.9744	-0.268598
84.1266	1.76734	84.1266	-0.42863
84.2789	1.62704	84.2789	-0.0480246
84.4311	1.77735	84.4311	-0.242001
84.5834	2.13044	84.5834	-0.224478
84.7356	1.71687	84.7356	-0.12067
84.8879	1.33553	84.8879	-0.237402
85.0401	1.27225	85.0401	-0.230244
85.1924	1.3741	85.1924	-0.229229
85.3446	1.15569	85.3446	-0.100909
85.4968	1.1378	85.4968	-0.182573
85.6491	1.19965	85.6491	-0.191527
85.8013	1.14211	85.8013	-0.261309
85.9536	1.13104	85.9536	-0.0978296
86.1058	1.04811	86.1058	-0.181456
86.2581	1.12595	86.2581	-0.0532301
86.4103	1.04157	86.4103	-0.302222
86.5626	1.50379	86.5626	0.0538262
86.7148	1.24485	86.7148	-0.169842
86.8671	1.24752	86.8671	-0.120641
87.0193	1.44239	87.0193	0.0321936
87.1716	1.32447	87.1716	-0.19423
87.3238	1.20491	87.3238	-0.323919
87.4761	0.982556	87.4761	-0.259857
87.6283	0.622754	87.6283	0.0260543
87.7805	0.627468	87.7805	-0.273527
87.9328	1.38917	87.9328	-0.135599
88.085	1.09205	88.085	-0.0396476
88.2373	1.09539	88.2373	-0.283251
88.3895	1.17344	88.3895	-0.142942
88.5418	1.03411	88.5418	-0.18233
88.694	1.11793	88.694	-0.126072
88.8463	1.2954	88.8463	-0.0571719
88.9985	0.981229	88.9985	0.0263207
89.1508	0.680421	89.1508	-0.0520424
89.303	1.01862	89.303	0.128897
89.4553	0.994217	89.4553	-0.0735598
89.6075	0.82583	89.6075	0.145355
89.7597	0.900165	89.7597	0.0417513
89.912	0.985885	89.912	0.0355549
90.0642	1.02318	90.0642	0.0614628
90.2165	1.2495	90.2165	0.0583694
90.3687	1.02763	90.3687	0.0586362
90.521	0.860758	90.521	-0.00291283
90.6732	0.95532	90.6732	0.10744
90.8255	1.14961	90.8255	0.292341
90.9777	1.01167	90.9777	0.0322738
91.13	1.09548	91.13	-0.10167
91.2822	1.35533	91.2822	0.172352
91.4345	1.34681	91.4345	-0.0859507
91.5867	1.33473	91.5867	-0.0501693
91.739	1.51238	91.739	0.000282694
91.8912	1.34422	91.8912	0.00977673
92.0434	1.49458	92.0434	0.110581
92.1957	1.51626	92.1957	0.26805
92.3479	1.25952	92.3479	0.167337
92.5002	1.54231	92.5002	-0.0671887
92.6524	1.2449	92.6524	0.141612
92.8047	0.95402	92.8047	-0.0723915
92.9569	2.45815	92.9569	0.000549766
93.1092	3.01609	93.1092	-0.262331
93.2614	3.31743	93.2614	-0.0963396
93.4137	1.79872	93.4137	0.0889408
93.5659	2.07601	93.5659	-0.0114977
93.7182	1.58002	93.7182	0.154609
93.8704	2.36047	93.8704	0.0359453
94.0227	3.63181	94.0227	-0.0269394
94.1749	3.09955	94.1749	-0.202722
94.3271	2.26864	94.3271	-0.066694
94.4794	2.20878	94.4794	0.0140978
94.6316	1.95487	94.6316	-0.0580859
94.7839	1.56786	94.7839	-0.000433217
94.9361	1.59612	94.9361	0.116369
95.0884	1.56879	95.0884	0.232088
95.2406	1.45586	95.2406	0.00646334
95.3929	1.50824	95.3929	-0.0604368
95.5451	1.517	95.5451	0.0219846
95.6974	1.59467	95.6974	-0.0437737
95.8496	1.50323	95.8496	0.262087
96.0019	1.61738	96.0019	0.160454
96.1541	1.81653	96.1541	0.313706
96.3064	1.57557	96.3064	0.220096
96.4586	1.51706	96.4586	0.265506
96.6108	1.60435	96.6108	0.187873
96.7631	1.47248	96.7631	0.164203
96.9153	1.63414	96.9153	0.333178
97.0676	1.65307	97.0676	0.132719
97.2198	1.62202	97.2198	0.300701
97.3721	1.69887	97.3721	0.344852
97.5243	1.83987	97.5243	0.191266
97.6766	1.43198	97.6766	0.158296
97.8288	1.1043	97.8288	0.188215
97.9811	1.40026	97.9811	0.234101
98.1333	2.9106	98.1333	-0.117579
98.2856	4.23346	98.2856	-0.161378
98.4378	4.33105	98.4378	-0.0802267
98.59	4.18504	98.59	-0.0382264
98.7423	2.17	98.7423	-0.104909
98.8945	2.25572	98.8945	-0.0196238
99.0468	3.1714	99.0468	0.114336
99.199	2.62641	99.199	-0.0616148
99.3513	2.25402	99.3513	-0.0185266
99.5035	1.69114	99.5035	0.0171125
99.6558	0.860214	99.6558	0.273947
99.808	0.662117	99.808	0.0985081
99.9603	0.915984	99.9603	0.167526
100.113	0.526816	100.113	0.271099
100.265	0.758476	100.265	0.335229
100.417	0.879886	100.417	0.287599
100.569	0.974309	100.569	0.187652
100.722	1.04958	100.722	0.311361
100.874	1.33439	100.874	0.355922
101.026	1.40261	101.026	0.130479
101.178	1.25753	101.178	0.2017
101.33	1.43247	101.33	0.173071
101.483	1.51879	101.483	0.174008
101.635	1.50997	101.635	0.125922
101.787	1.76476	101.787	0.349285
101.939	1.60517	101.939	0.182076
102.092	1.44099	102.092	0.219337
102.244	1.7015	102.244	0.046567
102.396	1.71006	102.396	0.263883
102.548	1.72859	102.548	-0.128176
102.701	1.62742	102.701	-0.0868577
102.853	1.82499	102.853	0.0125807
103.005	1.66319	103.005	0.0157072
103.157	1.87547	103.157	0.0637537
103.31	1.65663	103.31	0.384768
103.462	1.3184	103.462	0.0487922
103.614	1.02856	103.614	0.133081
103.766	1.49523	103.766	0.218555
103.919	1.17515	103.919	0.101359
104.071	1.19823	104.071	0.170691
104.223	1.2926	104.223	0.222966
104.375	1.02994	104.375	-0.00798269
104.528	1.24914	104.528	0.241118
104.68	1.75529	104.68	0.0576149
104.832	1.43938	104.832	0.0453317
104.984	1.44927	104.984	0.0590157
105.137	1.99854	105.137	0.201602
105.289	1.74708	105.289	0.113967
105.441	1.58091	105.441	0.0830893
105.593	1.82933	105.593	0.225236
105.746	1.44164	105.746	-0.0327173
105.898	1.21815	105.898	-0.188923
106.05	1.82409	106.05	0.0352312
106.202	1.10804	106.202	-0.137259
106.355	1.21423	106.355	-0.0522829
106.507	1.34125	106.507	-0.172317
106.659	1.23125	106.659	-0.250118
106.811	1.36573	106.811	-0.211535
106.964	1.42925	106.964	0.0160186
107.116	1.50735	107.116	-0.0627003
107.268	1.15376	107.268	-0.17822
107.42	1.8138	107.42	0.016134
107.573	1.47105	107.573	-0.237104
107.725	1.34526	107.725	-0.358806
107.877	1.77583	107.877	-0.216446
108.029	1.24957	108.029	-0.119879
108.182	0.911322	108.182	-0.360902
108.334	1.1957	108.334	0.0951603
108.486	1.13774	108.486	-0.11195
108.638	0.952543	108.638	0.0822257
108.791	1.41911	108.791	0.137313
108.943	1.46481	108.943	-0.0814755
109.095	1.4665	109.095	-0.0402825
109.247	1.27378	109.247	-0.110789
109.4	1.27978	109.4	-0.076967
109.552	1.3079	109.552	-0.0801893
109.704	0.696807	109.704	0.00132024
109.856	0.980553	109.856	0.169079
110.009	0.437178	110.009	-0.170409
110.161	1.06262	110.161	0.0289532
110.313	1.17879	110.313	0.022333
110.465	0.570849	110.465	0.073403
110.618	0.723668	110.618	-0.0826704
110.77	1.09368	110.77	0.148769
110.922	1.13539	110.922	0.00155837
111.074	0.921071	111.074	0.021492
111.227	1.36402	111.227	-0.0921253
111.379	0.917144	111.379	0.119214
111.531	1.03921	111.531	0.27013
111.683	0.614872	111.683	0.237021
111.836	0.708704	111.836	0.338941
111.988	0.73736	111.988	0.108824
112.14	1.01433	112.14	0.130276
112.292	0.747529	112.292	0.0674674
112.444	0.795468	112.444	0.263026
112.597	0.61306	112.597	0.10802
112.749	0.894559	112.749	0.337359
112.901	0.743255	112.901	0.173395
113.053	0.935196	113.053	0.254626
113.206	1.05994	113.206	0.183151
113.358	0.925172	113.358	0.0830004
113.51	0.975041	113.51	0.223735
113.662	0.717628	113.662	0.049534
113.815	0.625898	113.815	-0.0579493
113.967	1.39382	113.967	0.211024
114.119	0.976524	114.119	0.242629
114.271	1.3218	114.271	0.187598
114.424	1.52335	114.424	0.518105
114.576	1.26907	114.576	0.303001
114.728	1.32468	114.728	0.0478915
114.88	1.68469	114.88	0.499713
115.033	1.05166	115.033	-0.0270268
115.185	1.22996	115.185	0.34001
115.337	1.79957	115.337	0.452712
115.489	1.13393	115.489	0.408585
115.642	1.47513	115.642	0.387962
115.794	1.36488	115.794	0.161235
115.946	1.08779	115.946	0.422749
116.098	1.2886	116.098	0.45613
116.251	1.39287	116.251	0.301294
116.403	1.26219	116.403	0.307765
116.555	1.33554	116.555	0.221732
116.707	1.17481	116.707	0.279614
116.86	1.22688	116.86	0.242854
117.012	1.28464	117.012	0.363448
117.164	1.30387	117.164	0.362663
117.316	1.2331	117.316	0.202883
117.469	1.34604	117.469	0.228712
117.621	1.09061	117.621	0.177215
117.773	0.585603	117.773	0.424094
117.925	0.807731	117.925	0.165741
118.078	1.38931	118.078	0.128002
118.23	1.18685	118.23	0.34438
118.382	1.01565	118.382	0.225638
118.534	0.959091	118.534	0.390525
118.687	0.984867	118.687	0.241254
118.839	1.09606	118.839	0.386704
118.991	1.46909	118.991	0.358643
119.143	0.969152	119.143	0.303541
119.296	1.13165	119.296	0.39622
119.448	0.952186	119.448	0.289736
119.6	0.785419	119.6	0.239685
119.752	0.76739	119.752	0.280519
119.905	0.955024	119.905	0.325977
120.057	0.918317	120.057	0.238504
120.209	0.873226	120.209	0.294493
120.361	0.93465	120.361	0.431913
120.514	0.752141	120.514	0.0703895
120.666	0.224057	120.666	0.0511645
120.818	0.0672659	120.818	0.188781
120.97	0.487726	120.97	0.130773
121.123	0.574139	121.123	0.133429
121.275	0.746941	121.275	0.0155938
121.427	0.624853	121.427	0.117823
121.579	0.533652	121.579	0.04514
121.732	0.807456	121.732	0.0912631
121.884	1.23997	121.884	0.3847
122.036	1.14031	122.036	-0.0348871
122.188	1.27485	122.188	-0.000104049
122.341	1.15026	122.341	-0.0175129
122.493	0.550821	122.493	0.046958
122.645	0.608017	122.645	0.11995
122.797	1.13571	122.797	-0.0797399
122.95	1.17112	122.95	0.0471913
123.102	1.32002	123.102	-0.0809685
123.254	1.67424	123.254	-0.0387982
123.406	1.2582	123.406	-0.0536901
123.558	1.36383	123.558	0.118073
123.711	1.29264	123.711	0.183513
123.863	1.3163	123.863	0.00526996
124.015	1.25176	124.015	-0.0423063
124.167	2.02379	124.167	0.120032
124.32	1.60118	124.32	-0.0140563
124.472	1.48896	124.472	0.0593184
124.624	2.14814	124.624	-0.0271034
124.776	1.79181	124.776	-0.105675
124.929	0.927695	124.929	-0.186141
125.081	1.44484	125.081	-0.0175415
125.233	1.24508	125.233	-0.212683
125.385	1.16057	125.385	-0.06923
125.538	1.60683	125.538	-0.0141893
125.69	1.0346	125.69	-0.372444
125.842	1.10077	125.842	-0.222404
125.994	1.58508	125.994	0.0761554
126.147	1.52132	126.147	-0.126801
126.299	1.616	126.299	-0.157975
126.451	1.60735	126.451	-0.07519
126.603	1.48473	126.603	-0.0993016
126.756	1.21757	126.756	-0.0946184
126.908	1.49564	126.908	0.0274563
127.06	1.19152	127.06	-0.160715
127.212	0.943727	127.212	-0.0524937
127.365	1.73274	127.365	0.178697
127.517	1.40299	127.517	-0.11827
127.669	1.50189	127.669	-0.229945
127.821	1.99989	127.821	-0.215591
127.974	1.78619	127.974	-0.168904
128.126	1.66588	128.126	-0.156216
128.278	1.91617	128.278	0.0447222
128.43	1.82158	128.43	-0.27229
128.583	1.64453	128.583	-0.160568
128.735	2.21292	128.735	-0.208235
128.887	1.85209	128.887	-0.209143
129.039	1.88081	129.039	-0.0348828
129.192	1.97612	129.192	0.0631125
129.344	1.8078	129.344	-0.1048
129.496	1.66253	129.496	-0.317839
129.648	2.04397	129.648	0.127692
129.801	1.81445	129.801	-0.199858
129.953	0.785691	129.953	-0.095445
130.105	1.34264	130.105	0.117721
130.257	0.696439	130.257	-0.0941132
130.41	1.16703	130.41	-0.080504
130.562	1.62103	130.562	-0.123199
130.714	1.40398	130.714	0.152581
130.866	1.10242	130.866	0.230034
131.019	1.44419	131.019	0.0180445
131.171	1.26458	131.171	-0.0606614
131.323	1.19172	131.323	0.0500561
131.475	1.3229	131.475	0.14424
131.628	0.770896	131.628	0.183736
131.78	0.684245	131.78	0.186268
131.932	1.13526	131.932	0.215697
132.084	1.11975	132.084	0.0432208
132.237	0.904316	132.237	0.210297
132.389	1.28978	132.389	0.0695434
132.541	1.25256	132.541	-0.0467823
132.693	1.21967	132.693	0.0492097
132.846	1.27105	132.846	0.151258
132.998	1.26846	132.998	-0.0702274
133.15	1.12398	133.15	0.0531703
133.302	0.862294	133.302	0.363375
133.455	0.819103	133.455	0.161266
133.607	0.81781	133.607	-0.00742322
133.759	0.966557	133.759	0.169114
133.911	1.06513	133.911	0.253743
134.063	1.083	134.063	0.151921
134.216	0.427094	134.216	0.108963
134.368	0.4287	134.368	0.117224
134.52	0.694799	134.52	0.0578021
134.672	1.16779	134.672	0.207411
134.825	1.20624	134.825	-0.0226183
134.977	0.963573	134.977	0.187428
135.129	0.692652	135.129	-0.051076
135.281	0.299989	135.281	0.0906867
135.434	0.633712	135.434	0.338235
135.586	0.591497	135.586	0.0781473
135.738	0.915237	135.738	0.0916899
135.89	1.16202	135.89	0.1707
136.043	1.06576	136.043	0.251492
136.195	0.817077	136.195	0.265211
136.347	0.812391	136.347	0.227327
136.499	0.77181	136.499	0.238127
136.652	0.863018	136.652	0.133278
136.804	1.0054	136.804	0.0897544
136.956	0.797866	136.956	0.155439
137.108	0.998983	137.108	0.15361
137.261	0.982924	137.261	-0.0187859
137.413	0.906491	137.413	0.116302
137.565	0.610463	137.565	-0.037512
137.717	0.507296	137.717	-0.0580937
137.87	0.621705	137.87	0.210655
138.022	0.632586	138.022	0.0697601
138.174	0.683375	138.174	0.103179
138.326	0.603514	138.326	0.212496
138.479	0.636508	138.479	0.0149066
138.631	0.802971	138.631	0.225401
138.783	0.295604	138.783	0.157671
138.935	0.182781	138.935	-0.016211
139.088	0.569387	139.088	0.0921888
139.24	0.28322	139.24	0.236619
139.392	0.352197	139.392	-0.0819319
139.544	0.502407	139.544	0.0335781
139.697	0.726532	139.697	0.0467852
139.849	0.821702	139.849	-0.0533084
140.001	0.808617	140.001	0.0518732
140.153	0.727705	140.153	0.216314
140.306	0.725213	140.306	0.110367
140.458	0.545587	140.458	0.0150344
140.61	0.948809	140.61	0.239791
140.762	0.693566	140.762	-0.0609703
140.915	0.657999	140.915	0.143084
141.067	0.840823	141.067	0.092111
141.219	0.794564	141.219	-0.0277066
141.371	0.85327	141.371	0.0176514
141.524	1.20643	141.524	0.100032
141.676	1.26715	141.676	0.192923
141.828	1.19993	141.828	0.0149524
141.98	1.34307	141.98	0.175993
142.133	1.37396	142.133	-0.0444649
142.285	1.15163	142.285	-0.0569811
142.437	1.33401	142.437	0.172833
142.589	1.29697	142.589	-0.068146
142.742	0.942445	142.742	-0.0514585
142.894	0.997489	142.894	-0.0649321
143.046	2.42472	143.046	0.00163464
143.198	1.01359	143.198	0.163369
143.351	0.786737	143.351	0.0413184
143.503	1.11785	143.503	-0.0321802
143.655	0.887827	143.655	-0.129885
143.807	1.41642	143.807	-0.109291
143.96	1.45168	143.96	-0.00265209
144.112	1.44842	144.112	-0.026026
144.264	2.04098	144.264	-0.0380154
144.416	1.84856	144.416	-0.156401
144.569	1.62366	144.569	-0.256882
144.721	1.98541	144.721	0.0657079
144.873	1.57574	144.873	-0.0941741
145.025	0.439388	145.025	-0.120868
145.177	1.01045	145.177	-0.0969039
145.33	0.69536	145.33	-0.0691691
145.482	0.628539	145.482	-0.0128877
145.634	1.33735	145.634	-0.116678
145.786	1.23487	145.786	-0.23831
145.939	1.29023	145.939	-0.187945
146.091	1.4601	146.091	0.225074
146.243	0.577664	146.243	-0.0534248
146.395	0.307995	146.395	0.0960294
146.548	0.666317	146.548	0.0149943
146.7	0.547852	146.7	-0.0922434
146.852	0.764752	146.852	0.0231813
147.004	0.805911	147.004	0.0351064
147.157	0.881204	147.157	0.132808
147.309	1.11321	147.309	0.0427529
147.461	1.13257	147.461	0.124442
147.613	1.0768	147.613	0.0843484
147.766	1.19322	147.766	-0.109096
147.918	0.717755	147.918	0.00329404
148.07	0.947	148.07	0.255929
148.222	1.0631	148.222	0.0869393
148.375	0.983778	148.375	0.125129
148.527	0.866804	148.527	0.0196349
148.679	1.01505	148.679	-0.0761094
148.831	1.15956	148.831	0.136641
148.984	1.16051	148.984	0.230198
149.136	1.25417	149.136	0.208702
149.288	0.800572	149.288	-0.0222723
149.44	0.6281	149.44	0.149277
149.593	0.604729	149.593	-0.0511574
149.745	0.890194	149.745	0.144964
149.897	0.963965	149.897	0.101215
150.049	0.941139	150.049	0.0903805
150.202	1.34385	150.202	0.166217
150.354	1.03275	150.354	0.237696
150.506	0.993816	150.506	-0.0529371
150.658	1.13518	150.658	0.284277
150.811	0.756775	150.811	0.141298
150.963	0.732625	150.963	0.09677
151.115	0.682491	151.115	0.160236
151.267	1.024	151.267	0.163297
151.42	1.21221	151.42	0.0217311
151.572	1.25912	151.572	0.199277
151.724	1.32647	151.724	0.444369
151.876	1.07229	151.876	0.134298
152.029	0.7655	152.029	0.203583
152.181	0.691196	152.181	0.331669
152.333	0.857044	152.333	0.115006
152.485	1.11178	152.485	0.154434
152.638	1.40086	152.638	-0.0222469
152.79	1.35954	152.79	0.317549
152.942	1.47587	152.942	0.329935
153.094	1.59521	153.094	0.32647
153.247	1.36698	153.247	0.172981
153.399	1.65919	153.399	0.288529
153.551	1.55108	153.551	0.146222
153.703	1.55259	153.703	0.222137
153.856	1.46419	153.856	0.0105029
154.008	1.72466	154.008	0.252731
154.16	1.57603	154.16	0.0980586
154.312	1.44262	154.312	0.174526
154.465	1.73838	154.465	0.130653
154.617	1.39882	154.617	0.393577
154.769	1.48413	154.769	0.213636
154.921	1.6293	154.921	0.209079
155.074	1.30214	155.074	0.214931
155.226	1.23984	155.226	0.220266
155.378	1.8251	155.378	0.0382802
155.53	3.19442	155.53	-0.127798
155.683	3.75529	155.683	-0.19162
155.835	3.8058	155.835	-0.332521
155.987	3.94342	155.987	-0.0283477
156.139	2.39442	156.139	-0.151023
156.291	2.22918	156.291	0.0974937
156.444	2.72513	156.444	-0.0547014
156.596	3.06413	156.596	-0.0309301
156.748	3.29159	156.748	-0.00334419
156.9	2.8203	156.9	-0.158899
157.053	2.22175	157.053	-0.0738881
157.205	2.21647	157.205	0.024044
157.357	1.95776	157.357	0.125291
157.509	1.71143	157.509	-0.0738588
157.662	1.83661	157.662	-0.0908827
157.814	1.74967	157.814	-0.0773847
157.966	2.01392	157.966	0.0235765
158.118	2.13689	158.118	0.0588207
158.271	1.93691	158.271	0.070552
158.423	1.8184	158.423	0.096067
158.575	1.73239	158.575	-0.144731
158.727	1.12474	158.727	-0.113838
158.88	1.23842	158.88	0.111618
159.032	1.1158	159.032	0.114199
159.184	1.09146	159.184	-0.134445
159.336	0.827429	159.336	-0.161207
159.489	1.12388	159.489	0.0111769
159.641	1.22238	159.641	-0.120893
159.793	1.12298	159.793	-0.0197294
159.945	1.13924	159.945	0.0291946
160.098	1.24628	160.098	-0.045453
160.25	1.27613	160.25	0.114785
160.402	1.46114	160.402	0.175067
160.554	1.44422	160.554	0.0593358
160.707	1.52667	160.707	0.132974
160.859	1.61753	160.859	0.274041
161.011	1.67246	161.011	0.0295576
161.163	1.75738	161.163	0.0354181
161.316	1.95081	161.316	0.0170507
161.468	1.84927	161.468	0.196078
161.62	1.68222	161.62	0.0914273
161.772	2.07513	161.772	0.243184
161.925	1.91981	161.925	0.0588954
162.077	2.0714	162.077	0.0142356
162.229	2.24169	162.229	0.0673149
162.381	2.08939	162.381	0.0202574
162.534	1.96376	162.534	-0.0878244
162.686	2.38157	162.686	-0.0454313
162.838	2.10586	162.838	-0.240518
162.99	2.09116	162.99	-0.265623
163.143	2.23893	163.143	-0.287858
163.295	2.23152	163.295	-0.113286
163.447	2.1851	163.447	-0.215771
163.599	2.35525	163.599	-0.301238
163.752	2.44393	163.752	-0.0929919
163.904	2.16612	163.904	-0.222095
164.056	2.196	164.056	-0.268986
164.208	2.01926	164.208	-0.141938
164.361	1.99654	164.361	-0.303977
164.513	1.63791	164.513	-0.174483
164.665	1.93641	164.665	-0.0658632
164.817	2.21934	164.817	-0.152534
164.97	1.99519	164.97	-0.3107
165.122	2.26932	165.122	-0.0443868
165.274	1.93047	165.274	-0.157324
165.426	2.24851	165.426	0.0988635
165.579	2.38105	165.579	0.123961
165.731	1.99883	165.731	-0.0865035
165.883	2.05936	165.883	0.148767
166.035	2.33435	166.035	0.042434
166.188	2.30639	166.188	-0.0340126
166.34	2.17731	166.34	-0.0211512
166.492	2.50748	166.492	-0.0939884
166.644	2.20779	166.644	-0.173912
166.797	2.41477	166.797	0.0803713
166.949	2.34451	166.949	0.0447074
167.101	2.23267	167.101	-0.111437
167.253	2.18829	167.253	-0.19496
167.405	2.44373	167.405	-0.106895
167.558	2.07692	167.558	-0.0882072
167.71	2.20523	167.71	-0.0167123
167.862	2.56374	167.862	-0.175647
168.014	2.07863	168.014	-0.174254
168.167	2.20045	168.167	-0.343298
168.319	2.50832	168.319	-0.29897
168.471	2.02937	168.471	-0.311694
168.623	2.03661	168.623	-0.343963
168.776	2.63657	168.776	-0.175973
168.928	2.03867	168.928	-0.328453
169.08	2.15624	169.08	-0.387887
169.232	2.64871	169.232	-0.257401
169.385	2.00543	169.385	-0.283237
169.537	2.09651	169.537	-0.275155
169.689	2.61059	169.689	-0.279682
169.841	2.27968	169.841	-0.312598
169.994	2.22838	169.994	-0.368876
170.146	2.56486	170.146	-0.203777
170.298	1.95174	170.298	-0.379366
170.45	2.29587	170.45	-0.187882
170.603	2.42355	170.603	-0.34689
170.755	1.51363	170.755	-0.403198
170.907	1.10556	170.907	-0.588355
171.059	2.18546	171.059	-0.224351
171.212	2.10133	171.212	-0.207526
171.364	1.89368	171.364	-0.317185
171.516	1.74912	171.516	-0.450823
171.668	1.9047	171.668	-0.335221
171.821	1.10471	171.821	-0.458568
171.973	1.38925	171.973	-0.316519
172.125	2.14586	172.125	-0.180915
172.277	1.91329	172.277	-0.301336
172.43	1.69193	172.43	-0.345992
172.582	1.98693	172.582	-0.285818
172.734	1.70677	172.734	-0.336835
172.886	1.83981	172.886	-0.249641
173.039	2.24472	173.039	-0.128721
173.191	1.65943	173.191	-0.408054
173.343	1.72646	173.343	-0.232829
173.495	2.32857	173.495	-0.309771
173.648	2.0434	173.648	-0.488492
173.8	1.06563	173.8	-0.360445
173.952	2.02297	173.952	-0.094207
174.104	1.65009	174.104	-0.201595
174.257	1.56971	174.257	-0.352742
174.409	2.12846	174.409	-0.246351
174.561	0.93819	174.561	-0.408696
174.713	0.886339	174.713	-0.305833
174.866	1.79649	174.866	-0.194822
175.018	1.37704	175.018	-0.26432
175.17	1.42016	175.17	-0.207595
175.322	2.0097	175.322	-0.0783701
175.475	1.04984	175.475	-0.152776
175.627	1.30978	175.627	-0.206217
175.779	1.71048	175.779	-0.121216
175.931	1.39051	175.931	-0.16471
176.084	0.960661	176.084	-0.130096
176.236	0.952997	176.236	0.00865358
176.388	1.56597	176.388	0.153896
176.54	1.526	176.54	0.042069
176.693	1.53676	176.693	-0.0760578
176.845	1.68355	176.845	0.144971
176.997	1.67936	176.997	-0.109663
177.149	1.71423	177.149	-0.102062
177.302	1.72574	177.302	-0.0229191
177.454	1.81223	177.454	-0.0241779
177.606	1.78156	177.606	-0.110132
177.758	1.7965	177.758	-0.0111725
177.911	1.6417	177.911	-0.270748
178.063	2.00678	178.063	0.0288833
178.215	1.99158	178.215	0.086753
178.367	1.56165	178.367	-0.00779338
178.519	1.7776	178.519	0.0607577
178.672	1.75818	178.672	0.217604
178.824	1.5832	178.824	0.0693137
178.976	1.75627	178.976	0.00584118
179.128	1.54027	179.128	0.29282
179.281	1.24556	179.281	0.268329
179.433	1.56404	179.433	0.112175
179.585	1.81637	179.585	0.221784
179.737	1.58032	179.737	0.25081
179.89	1.38173	179.89	0.141224
180.042	1.65987	180.042	0.0579128
180.194	1.38896	180.194	0.203621
180.346	0.994222	180.346	-0.0444794
180.499	1.40527	180.499	-0.0174243
180.651	1.45729	180.651	0.16693
180.803	1.27798	180.803	-0.103041
180.955	1.39313	180.955	0.2333
181.108	1.53663	181.108	0.215353
181.26	1.4744	181.26	0.241448
181.412	1.54436	181.412	0.116415
181.564	1.51011	181.564	0.234462
181.717	1.4624	181.717	0.256424
181.869	1.78327	181.869	0.161867
182.021	1.60754	182.021	0.208012
182.173	1.82069	182.173	0.198666
182.326	1.70142	182.326	0.28501
182.478	1.60287	182.478	0.256584
182.63	1.6928	182.63	0.143972
182.782	1.66779	182.782	0.00164097
182.935	1.66447	182.935	0.242258
183.087	1.61692	183.087	0.0660319
183.239	1.74861	183.239	0.117789
183.391	1.85026	183.391	0.268245
183.544	1.69205	183.544	0.267014
183.696	0.78	183.696	0.0296703
183.848	0.498088	183.848	0.0550995
184	0.85537	184	0.0700052
184.153	2.13285	184.153	-0.295029
184.305	2.54952	184.305	-0.151421
184.457	2.65296	184.457	-0.356194
184.609	2.23889	184.609	-0.0710543
184.762	3.16781	184.762	-0.209854
184.914	3.21366	184.914	-0.239031
185.066	0.557711	185.066	-0.164268
185.218	0.700005	185.218	-0.244776
185.371	0.777024	185.371	-0.0979499
185.523	0.708889	185.523	0.0464012
185.675	1.28154	185.675	0.178483
185.827	1.273	185.827	-0.138297
185.98	0.85349	185.98	-0.221003
186.132	0.486349	186.132	-0.0333006
186.284	0.502634	186.284	-0.109831
186.436	0.754632	186.436	-0.0785025
186.589	0.945821	186.589	0.0858903
186.741	0.844676	186.741	-0.280564
186.893	1.15474	186.893	-0.150696
187.045	1.6803	187.045	-0.0604799
187.198	1.81775	187.198	-0.148124
187.35	1.81648	187.35	-0.181616
187.502	1.89916	187.502	-0.114908
187.654	1.89143	187.654	-0.194261
187.807	2.03618	187.807	-0.114444
187.959	2.05775	187.959	-0.194527
188.111	1.78501	188.111	-0.256795
188.263	2.23194	188.263	-0.222288
188.416	1.76534	188.416	-0.159003
188.568	1.94898	188.568	-0.157606
188.72	2.10341	188.72	-0.0820455
188.872	2.43106	188.872	-0.110159
189.025	2.11858	189.025	-0.312602
189.177	2.40641	189.177	0.0468437
189.329	2.24531	189.329	-0.00977563
189.481	1.96952	189.481	-0.359909
189.633	2.47908	189.633	-0.0943698
189.786	2.25554	189.786	-0.248532
189.938	2.06881	189.938	-0.30578
190.09	2.31157	190.09	-0.0938368
190.242	1.9832	190.242	-0.23279
190.395	1.41644	190.395	-0.234413
190.547	1.55507	190.547	-0.220525
190.699	1.25225	190.699	-0.32478
190.851	1.38415	190.851	-0.0812609
191.004	1.94636	191.004	0.0694469
191.156	0.79061	191.156	-0.216842
191.308	0.705504	191.308	-0.100994
191.46	1.77685	191.46	0.133473
191.613	1.50156	191.613	-0.0186722
191.765	1.33433	191.765	-0.11071
191.917	1.09618	191.917	-0.0645327
192.069	0.853302	192.069	-0.168043
192.222	1.29786	192.222	0.0690572
192.374	1.45441	192.374	0.0559576
192.526	1.36958	192.526	-0.122244
192.678	1.42014	192.678	-0.274956
192.831	1.51792	192.831	-0.0398773
192.983	0.929872	192.983	0.0895904
193.135	0.6641	193.135	-0.11668
193.287	0.892898	193.287	-0.0273873
193.44	1.24312	193.44	-0.0443844
193.592	1.21365	193.592	-0.0913663
193.744	1.21479	193.744	-0.00367938
193.896	1.00685	193.896	-0.181143
194.049	0.98894	194.049	-0.00441519
194.201	1.25294	194.201	0.188143
194.353	1.02273	194.353	-0.0244079
194.505	1.19296	194.505	-0.210483
194.658	1.07755	194.658	-0.100626
194.81	0.894365	194.81	-0.0477964
194.962	1.37113	194.962	0.196345
195.114	1.08753	195.114	-0.0313398
195.267	1.24609	195.267	-0.124399
195.419	1.38848	195.419	-0.0152277
195.571	1.43198	195.571	-0.106563
195.723	1.27423	195.723	0.0263292
195.876	1.21125	195.876	0.140528
196.028	0.809374	196.028	-0.0604247
196.18	1.28346	196.18	0.0295817
196.332	1.55448	196.332	0.0210721
196.485	1.50651	196.485	0.1587
196.637	1.38632	196.637	0.196722
196.789	1.32419	196.789	-0.0390309
196.941	1.58014	196.941	0.174964
197.094	1.25133	197.094	0.0920393
197.246	1.68417	197.246	0.0412641
197.398	1.15121	197.398	0.184046
197.55	1.22803	197.55	0.166184
197.703	1.42211	197.703	0.105336
197.855	1.69176	197.855	0.175713
198.007	1.37006	198.007	-0.0837077
198.159	1.17583	198.159	0.0342895
198.312	1.03848	198.312	0.352353
198.464	1.25289	198.464	0.0878785
198.616	1.35196	198.616	0.314688
198.768	1.38858	198.768	0.242987
198.921	1.32531	198.921	0.17661
199.073	0.821889	199.073	0.163469
199.225	1.42726	199.225	0.154147
199.377	1.13009	199.377	0.170453
199.53	1.34068	199.53	0.0622203
199.682	1.34385	199.682	0.0818384
199.834	1.08261	199.834	0.152374
199.986	0.995241	199.986	-0.00545575
200.139	0.926677	200.139	0.165637
200.291	1.08179	200.291	0.115609
200.443	0.804772	200.443	0.023071
200.595	0.743385	200.595	0.210387
200.747	0.45041	200.747	-0.0775343
200.9	0.47997	200.9	0.239645
201.052	0.673845	201.052	0.256375
201.204	0.629277	201.204	0.0768152
201.356	0.369942	201.356	0.161663
201.509	0.918962	201.509	-0.285811
201.661	2.33752	201.661	-0.0132801
201.813	2.60278	201.813	-0.0396467
201.965	2.78128	201.965	-0.15116
202.118	2.70012	202.118	-0.272581
202.27	3.06153	202.27	-0.174062
202.422	3.04643	202.422	-0.178427
202.574	2.05448	202.574	-0.20778
202.727	0.613463	202.727	-0.210881
202.879	0.368654	202.879	-0.190257
203.031	0.648892	203.031	-0.162399
203.183	1.13696	203.183	-0.118027
203.336	2.08244	203.336	-0.128094
203.488	1.94544	203.488	0.00995367
203.64	0.910102	203.64	-0.132135
203.792	0.870989	203.792	-0.122596
203.945	1.27592	203.945	-0.190964
204.097	1.09831	204.097	-0.00398504
204.249	0.904818	204.249	-0.40658
204.401	1.27745	204.401	-0.0785293
204.554	1.34922	204.554	-0.0466886
204.706	0.531396	204.706	-0.266774
204.858	0.448069	204.858	-0.181803
205.01	0.658376	205.01	-0.0125962
205.163	0.32124	205.163	-0.308646
205.315	0.852808	205.315	-0.0704011
205.467	0.24083	205.467	-0.20118
205.619	0.182191	205.619	-0.278413
205.772	0.658028	205.772	-0.247583
205.924	0.493817	205.924	-0.3661
206.076	0.622224	206.076	-0.32836
206.228	1.11656	206.228	-0.103516
206.381	1.04461	206.381	-0.173338
206.533	0.73307	206.533	-0.286415
206.685	1.11799	206.685	-0.235949
206.837	0.851926	206.837	-0.108041
206.99	0.950256	206.99	-0.121781
207.142	1.71757	207.142	-0.104186
207.294	1.12546	207.294	-0.267678
207.446	1.21561	207.446	-0.336831
207.599	1.68109	207.599	-0.0732918
207.751	0.596801	207.751	-0.312008
207.903	0.367794	207.903	-0.378708
208.055	0.994567	208.055	-0.155916
208.208	1.24422	208.208	-0.186915
208.36	1.08319	208.36	-0.291744
208.512	0.780861	208.512	-0.260989
208.664	0.581873	208.664	-0.124414
208.817	0.363816	208.817	0.012244
208.969	1.17998	208.969	-0.0697687
209.121	1.08457	209.121	-0.0350688
209.273	1.07453	209.273	-0.181381
209.426	0.425518	209.426	-0.158803
209.578	1.77943	209.578	-0.404063
209.73	2.3531	209.73	-0.486708
209.882	2.75815	209.882	-0.480461
210.035	2.61489	210.035	-0.277508
210.187	1.44375	210.187	-0.180637
210.339	1.09359	210.339	0.00436022
210.491	1.33242	210.491	0.0855147
210.644	2.20953	210.644	-0.189143
210.796	2.18237	210.796	-0.195709
210.948	1.39085	210.948	-0.200183
211.1	1.19333	211.1	0.093214
211.253	1.33348	211.253	-0.24957
211.405	1.267	211.405	0.0660151
211.557	1.40485	211.557	-0.18149
211.709	1.59528	211.709	-0.227379
211.861	1.67298	211.861	0.0308604
212.014	1.77918	212.014	0.0317345
212.166	1.77569	212.166	0.104458
212.318	1.687	212.318	0.0711567
212.47	1.83601	212.47	0.167123
212.623	1.92554	212.623	0.197541
212.775	1.59423	212.775	0.338068
212.927	1.95372	212.927	0.157032
213.079	2.09565	213.079	0.145247
213.232	1.87131	213.232	0.321522
213.384	1.93516	213.384	0.31386
213.536	1.68623	213.536	0.260145
213.688	1.37624	213.688	0.242563
213.841	1.44069	213.841	0.252593
213.993	1.38486	213.993	0.250659
214.145	0.98408	214.145	0.175923
214.297	1.04067	214.297	-0.011454
214.45	1.11778	214.45	0.197095
214.602	0.984291	214.602	0.24886
214.754	0.733732	214.754	0.127768
214.906	0.882029	214.906	0.158459
215.059	0.988657	215.059	0.218855
215.211	1.04302	215.211	0.186378
215.363	0.991964	215.363	0.35275
215.515	1.02873	215.515	0.177031
215.668	0.861929	215.668	0.109837
215.82	0.940623	215.82	0.317257
215.972	0.919778	215.972	0.252597
216.124	1.02688	216.124	0.233823
216.277	0.892739	216.277	0.212239
216.429	0.837896	216.429	0.215387
216.581	0.80888	216.581	0.309126
216.733	0.764008	216.733	0.516085
216.886	1.00791	216.886	0.363711
217.038	0.686836	217.038	0.439492
217.19	1.26065	217.19	0.748547
217.342	1.22194	217.342	0.447894
217.495	1.2107	217.495	0.656608
217.647	1.73374	217.647	0.3901
217.799	1.68624	217.799	0.402111
217.951	1.76054	217.951	0.232501
218.104	1.93112	218.104	0.385452
218.256	1.84301	218.256	0.327955
218.408	1.71802	218.408	0.32606
218.56	2.05698	218.56	0.218268
218.713	2.35561	218.713	0.231744
218.865	2.07629	218.865	0.158136
219.017	1.66909	219.017	-0.118031
219.169	2.02728	219.169	0.300099
219.322	1.51365	219.322	0.0335591
219.474	1.51003	219.474	0.0449172
219.626	1.93524	219.626	0.285204
219.778	2.30006	219.778	-0.185171
219.931	2.294	219.931	-0.304639
220.083	2.03801	220.083	-0.181496
220.235	1.9388	220.235	-0.277372
220.387	1.70031	220.387	-0.229624
220.54	1.61486	220.54	0.0432994
220.692	1.5366	220.692	-0.184717
220.844	1.60834	220.844	-0.350293
220.996	1.94106	220.996	0.0687455
221.149	1.57447	221.149	-0.119044
221.301	1.54357	221.301	-0.0722862
221.453	1.68573	221.453	0.271749
221.605	0.427783	221.605	0.00186282
221.758	0.573354	221.758	0.0720534
221.91	0.831226	221.91	0.0793937
222.062	0.697719	222.062	0.159748
222.214	1.10265	222.214	0.115442
222.367	0.974567	222.367	0.170702
222.519	1.26383	222.519	0.0666288
222.671	1.20986	222.671	0.221307
222.823	0.807889	222.823	-0.0557109
222.975	1.59483	222.975	-0.0469105
223.128	1.24758	223.128	-0.233825
223.28	1.19333	223.28	-0.163925
223.432	1.93492	223.432	0.0530952
223.584	1.60221	223.584	0.0570338
223.737	1.60357	223.737	-0.0365305
223.889	1.42479	223.889	0.145239
224.041	1.27956	224.041	0.0414562
224.193	1.26833	224.193	-0.238481
224.346	1.48232	224.346	0.0730554
224.498	0.813842	224.498	-0.112237
224.65	0.480262	224.65	-0.346684
224.802	1.74004	224.802	-0.239021
224.955	1.49852	224.955	-0.0331065
225.107	1.22211	225.107	-0.398994
225.259	1.74067	225.259	-0.281354
225.411	1.3777	225.411	-0.173315
225.564	1.57437	225.564	0.000720982
225.716	1.51896	225.716	0.0214037
225.868	1.51729	225.868	-0.216218
226.02	1.60449	226.02	-0.128985
226.173	1.23578	226.173	-0.0312141
226.325	1.64241	226.325	-0.350757
226.477	1.14349	226.477	-0.156958
226.629	1.46099	226.629	-0.137929
226.782	2.01917	226.782	-0.266331
226.934	1.93434	226.934	-0.314565
227.086	1.76863	227.086	-0.292272
227.238	2.0735	227.238	-0.405874
227.391	2.05167	227.391	-0.454339
227.543	1.9804	227.543	-0.475518
227.695	2.26282	227.695	-0.204817
227.847	1.89401	227.847	-0.559643
228	1.69024	228	-0.137266
228.152	2.52246	228.152	-0.175944
228.304	2.19051	228.304	-0.366354
228.456	1.91518	228.456	-0.309527
228.609	2.1951	228.609	-0.226477
228.761	1.26255	228.761	-0.303581
228.913	1.38868	228.913	-0.272843
229.065	1.92122	229.065	-0.0903583
229.218	1.73476	229.218	-0.178498
