# Supplementary material for: Multiphoton imaging of neural structure and activity in Drosophila through the intact cuticle
Source: eLife. 2022 Jan 24;11:e69094. doi: 10.7554/eLife.69094 (PMC8846588; doi:10.7554/eLife.69094)
Supplement: Figure 3—source data 1. [file elife-69094-fig3-data1.xlsx]

## Sheet: 2P_Fluo
depth	ln(signal)
0	0
5	0.0354141
10	0.0160812
15	-0.110782
20	-0.249107
25	-0.39401
30	-0.520932
35	-0.701665
40	-0.897145
45	-1.09038
50	-1.30022
55	-1.75687
60	-2.13127
65	-2.40759
70	-2.64645
75	-2.83742
80	-2.98437
85	-3.18897
90	-3.41334
95	-3.50696

## Sheet: 3P_Fluo
depth	ln(signal)
0	0
5	-0.166831
10	-0.26453
15	-0.486387
20	-0.761448
25	-1.05622
30	-1.29837
35	-1.55973
40	-1.8249
45	-2.06284
50	-2.35333
55	-2.73112
60	-3.18261
65	-3.46881
70	-3.69944
75	-3.91971
80	-4.20386
85	-4.61156
90	-5.00196
95	-5.49791
100	-5.70081
105	-5.88499
110	-6.08012
115	-6.27729
120	-6.42771
125	-6.59346
130	-6.74262
135	-6.90978
140	-7.07709
145	-7.23561
150	-7.39565
155	-7.52902
160	-7.71348
165	-7.86475
170	-8.07666

## Sheet: 3P_THG
depth	ln(signal)
-35	2.1846
-30	2.09806
-25	2.03461
-20	1.96767
-15	1.91831
-10	1.64641
-5	0.859708
0	0
5	-0.430856
10	-0.551293
15	-1.00503
20	-1.29443
25	-1.61714
30	-1.70775
35	-1.72935
40	-2.38722
45	-2.4678
50	-2.87596
55	-3.2183
60	-3.11392
65	-3.1749
70	-3.61987
75	-4.00862
80	-4.50322
85	-4.3149
90	-4.61386
95	-5.00471
100	-5.62145
105	-5.97535
110	-6.06737
115	-6.23039
120	-6.4369
125	-6.4593
130	-6.53058
135	-6.76894
140	-6.93118
145	-7.10206
150	-7.17317
155	-7.39843
160	-7.65946
165	-7.89709
170	-8.15657
