# Supplementary material for: Multiphoton imaging of neural structure and activity in Drosophila through the intact cuticle
Source: eLife. 2022 Jan 24;11:e69094. doi: 10.7554/eLife.69094 (PMC8846588; doi:10.7554/eLife.69094)
Supplement: Figure 4—source data 1. [file elife-69094-fig4-data1.xlsx]

## Sheet: Sheet1
time	3P_cuticleIntact_65um			time	3P_cuticleIntact_85um			time	3P_cuticleIntact_120um			time	3P_cuticleRemoved_55um			time	3P_cuticleRemoved_80um			time	3P_cuticleRemoved_120um			time	3P_cuticleRemoved_200um			time	3P_cuticleRemoved_250um			time	2P_cuticleIntact_65um			time	2P_cuticleRemoved_55um			time	2P_cuticleRemoved_80um			time	2P_cuticleRemoved_120um
-5	-0.0360453	-0.0271352	0.00223696	-5	-0.0205096	-0.00295352	-0.0578113	-5	-0.0366462	0.0186899	-0.0214438	-5	-0.0558775	-0.00756448	-0.0996092	-7	0.0385779	-0.00797911	0.0177701	-4	0.0272764	0.0173002	0.0323558	-5	-0.00591435	-0.0187087	0.0227056	-5	0.0621972	0.016153	-0.0335986	-6	-0.0174989	-0.0144213	-0.0116442	-5	-0.0270516	0.0344843	-0.00157271	-5	-0.00964829	0.00590755	N/A	-5	0.00843781	0.00717581	0.0218865
-4.23594	-0.0043231	0.0275583	0.0118403	-4.23594	-0.00241916	-0.0177137	-0.0266864	-4.23594	0.000844447	-0.0203941	0.00356911	-4.23594	-0.00408167	-0.0305511	-0.0377951	-6.23594	0.0283847	-0.0292953	-0.0529178	-3.23594	-0.000932873	-0.0463587	0.0168873	-4.23594	0.00423227	-0.0120205	-0.0280759	-4.23594	-0.0206316	-0.00868432	0.0246602	-5.11723	0.00486793	-0.0033373	-0.0307721	-4.23594	-0.00994145	0.0368281	-0.0181479	-4.11723	0.00728891	0.0077127		-4.11723	-0.00111366	0.00185202	0.0131364
-3.47188	0.00627627	0.0538584	-0.0198265	-3.47188	-0.00681583	-0.0222945	0.0464997	-3.47188	-0.057433	-0.0276388	0.0355239	-3.47188	0.0381464	-0.0236368	-0.00166254	-5.47188	-0.000756442	0.0134758	-0.0326204	-2.47188	-0.00214655	-0.014157	0.0281475	-3.47188	0.0285615	-0.0332908	-0.0173562	-3.47188	-0.0262411	0.0239788	-0.0623983	-4.23446	-0.00234166	-0.0113597	-0.00508941	-3.47188	0.0133125	-0.00146794	0.023048	-3.23446	0.00772148	0.000302468		-3.23446	-0.00398312	-0.00132455	0.00306731
-2.70782	0.052862	-0.000747729	-0.0100343	-2.70782	0.0364972	-0.005028	0.0468331	-2.70782	-0.0229664	0.0166638	0.00687681	-2.70782	0.0829753	0.0671992	0.0363071	-4.70782	-0.0259384	0.0443529	-0.0118291	-1.70782	0.0293324	0.0277907	-0.00406465	-2.70782	0.0476612	0.0119998	0.0325273	-2.70782	-0.0253018	-0.018195	0.054383	-3.35169	0.0098301	-0.0163731	-0.0185274	-2.70782	0.00181236	-0.000642033	0.0047665	-2.35169	-0.000651313	-0.0095791		-2.35169	-0.00408632	-0.00574454	-0.0130618
-1.94377	-0.00264253	-0.00580237	-0.00326104	-1.94377	-0.0114118	-0.0678844	0.0405736	-1.94377	-0.0187841	0.0218966	0.0447601	-1.94377	0.0538182	0.0113852	0.075319	-3.94377	-0.0195951	0.0137475	0.0472495	-0.943765	0.0156334	-0.0169959	-0.0670082	-1.94377	0.0467372	0.00528183	0.0153529	-1.94377	0.0121074	0.0291756	-0.0194213	-2.46893	0.0082713	-0.0294231	-0.0472818	-1.94377	0.000475524	-0.0282273	-0.00475401	-1.46893	-0.0034174	-0.00796534		-1.46893	-0.0135083	0.0316339	-0.0162707
-1.17971	-0.0146276	-0.0472216	0.0189077	-1.17971	0.00436433	-0.104952	0.0521207	-1.17971	0.00097052	-0.0332966	-0.0550661	-1.17971	0.0347732	-0.101242	0.0137215	-3.17971	-0.0164976	0.035889	0.0316325	-0.179707	-0.0366107	-0.0504487	-0.00357725	-1.17971	-0.0304411	0.0473255	-0.0254772	-1.17971	0.000803376	-0.0427595	-0.0315232	-1.58616	-0.00313296	-0.017794	-0.0322093	-1.17971	0.0223465	-0.0408866	-0.00355008	-0.586158	-0.00135042	0.000232423		-0.586158	0.0152966	0.0648541	-0.00952
-0.415648	-0.0212258	-0.00500041	-0.00303228	-0.415648	-0.0144144	-0.118954	0.0575874	-0.415648	-0.00218786	0.0277267	0.188558	-0.415648	0.0229731	0.225564	0.0479693	-2.41565	-0.0311656	0.0114587	0.138628	0.584352	0.0349525	-0.0580658	0.101048	-0.415648	-0.0356938	0.00170856	0.0591637	-0.415648	0.00327597	-0.0699471	0.0373263	-0.70339	-0.0409236	-0.0303523	-0.0223973	-0.415648	0.0677921	-0.0192837	-0.00947175	0.29661	0.0593449	0.00199267		0.29661	0.121576	0.143321	0.115288
0.348411	-0.00281326	0.0304606	-0.0299381	0.348411	0.0340392	-0.0719374	0.126774	0.348411	0.198365	0.345622	0.558273	0.348411	0.45875	0.434395	-0.00539186	-1.65159	0.0760606	-0.0431855	0.0720207	1.34841	0.130111	0.0738917	0.225779	0.348411	0.064437	0.0489496	0.0736077	0.348411	-0.0248035	-0.0717411	0.0288437	0.179379	-0.0269546	-0.0451596	-0.0220089	0.348411	0.0329318	-0.024603	-0.00215525	1.17938	0.0655021	0.0385641		1.17938	0.259808	0.172786	0.209541
1.11247	-0.0348908	0.0203885	-0.0226098	1.11247	0.0494405	-0.0511971	0.143984	1.11247	0.385309	0.389271	0.38417	1.11247	0.722898	0.419686	0.254835	-0.887531	-0.00107341	0.0340114	0.0910685	2.11247	0.424263	0.0802174	0.285538	1.11247	0.261312	0.202368	0.292707	1.11247	0.144865	0.160634	0.263946	1.06215	0.00892582	0.0356181	0.0509513	1.11247	0.161696	0.158814	0.426295	2.06215	0.11254	0.101914		2.06215	0.304918	0.191757	0.236845
1.87653	-0.0177348	0.118386	0.0120793	1.87653	0.138562	-0.0213676	0.151478	1.87653	0.406624	0.444098	0.410828	1.87653	0.637884	0.311272	0.511103	-0.123472	0.0214077	-0.15933	0.132888	2.87653	0.670295	0.199952	0.282835	1.87653	0.321869	0.321517	0.328639	1.87653	0.362288	0.372361	0.44621	1.94492	0.157636	0.148163	0.151174	1.87653	0.407277	0.18196	0.431665	2.94492	0.143811	0.196893		2.94492	0.307936	0.234588	0.227108
2.64059	0.0586123	0.181625	-0.0305555	2.64059	0.179602	0.0217502	0.163968	2.64059	0.423737	0.410135	0.455212	2.64059	0.589764	0.213775	0.598965	0.640587	0.136074	0.086618	0.20255	3.64059	0.549697	0.197068	0.355562	2.64059	0.468362	0.396867	0.305502	2.64059	0.380174	0.362761	0.521125	2.82768	0.166675	0.245913	0.240401	2.64059	0.345923	0.177624	0.40614	3.82768	0.159546	0.254762		3.82768	0.283133	0.220712	0.231758
3.40465	0.107928	0.171093	0.105757	3.40465	0.205607	0.113223	0.167594	3.40465	0.402642	0.309857	0.408737	3.40465	0.514913	0.166099	0.502902	1.40465	0.167034	0.232513	0.235284	4.40465	0.495287	0.123925	0.334588	3.40465	0.500425	0.323372	0.3118	3.40465	0.386458	0.387651	0.445149	3.71045	0.190827	0.27221	0.255577	3.40465	0.291325	0.178785	0.403685	4.71045	0.177084	0.249034		4.71045	0.286969	0.185167	0.237274
4.1687	0.205489	0.202798	0.24171	4.1687	0.22755	0.140907	0.228432	4.1687	0.31736	0.422893	0.35872	4.1687	0.395005	0.0672779	0.357123	2.1687	0.212291	0.25152	0.278215	5.1687	0.539445	0.232478	0.320229	4.1687	0.421702	0.251597	0.322501	4.1687	0.372445	0.327428	0.463679	4.59322	0.205427	0.311529	0.297257	4.1687	0.235595	0.16548	0.366334	5.59322	0.174054	0.236157		5.59322	0.289204	0.183701	0.209584
4.93276	0.194858	0.193661	0.270058	4.93276	0.315625	0.110294	0.212457	4.93276	0.426336	0.372519	0.284311	4.93276	0.25767	0.128803	0.368279	2.93276	0.0920851	0.222881	0.19268	5.93276	0.484131	0.168135	0.249397	4.93276	0.459179	0.275284	0.261485	4.93276	0.348407	0.281657	0.450596	5.47599	0.1914	0.300682	0.283151	4.93276	0.170798	0.141375	0.291383	6.47599	0.164215	0.225794		6.47599	0.27552	0.19243	0.160255
5.69682	0.224125	0.197306	0.185959	5.69682	0.243766	0.154116	0.209275	5.69682	0.3592	0.330766	0.30834	5.69682	0.238764	0.0277066	0.29366	3.69682	0.0857267	0.253894	0.125769	6.69682	0.393622	0.240835	0.187027	5.69682	0.427697	0.308825	0.230973	5.69682	0.242867	0.285174	0.262584	6.35876	0.156456	0.268436	0.268202	5.69682	0.110957	0.1094	0.297009	7.35876	0.135532	0.18901		7.35876	0.23395	0.16974	0.144862
6.46088	0.227374	0.170439	0.176834	6.46088	0.257899	0.173979	0.142361	6.46088	0.289455	0.31863	0.276008	6.46088	0.338559	0.0264767	0.262279	4.46088	0.0132589	0.247158	0.130489	7.46088	0.359536	0.231105	0.218087	6.46088	0.405373	0.300397	0.214914	6.46088	0.281997	0.160027	0.27325	7.24153	0.137567	0.229964	0.235174	6.46088	0.0579241	0.117694	0.2906	8.24153	0.132965	0.169483		8.24153	0.209678	0.148926	0.139188
7.22494	0.183613	0.191771	0.0968891	7.22494	0.274211	0.118578	0.184992	7.22494	0.30796	0.178604	0.286313	7.22494	0.217505	-0.00312748	0.208853	5.22494	0.00459871	0.197363	0.122915	8.22494	0.365141	0.111396	0.239572	7.22494	0.521286	0.24345	0.203022	7.22494	0.282027	0.157354	0.200549	8.12429	0.111929	0.214283	0.221306	7.22494	0.0171718	0.138104	0.292643	9.12429	0.112614	0.149413		9.12429	0.192206	0.129202	0.134421
7.989	0.161478	0.185694	0.0691177	7.989	0.307702	0.0953578	0.176043	7.989	0.335679	0.243113	0.246473	7.989	0.197028	0.0493277	0.155659	5.989	0.0457823	0.171409	0.0981837	8.989	0.297339	0.130163	0.255714	7.989	0.478379	0.204262	0.196192	7.989	0.17819	0.121061	0.11776	9.00706	0.0976733	0.191117	0.161892	7.989	-0.00112065	0.119235	0.261989	10.0071	0.101156	0.142089		10.0071	0.209051	0.0975795	0.111894
8.75306	0.136485	0.145361	0.0691087	8.75306	0.140786	0.125724	0.17579	8.75306	0.229346	0.223854	0.227844	8.75306	0.246491	0.0300578	0.0926647	6.75306	0.017677	0.102126	0.132612	9.75306	0.280919	0.0774009	0.255087	8.75306	0.465161	0.158995	0.201941	8.75306	0.20562	0.146933	0.242469	9.88983	0.0779615	0.173271	0.138239	8.75306	0.00800104	0.0899334	0.220178	10.8898	0.110911	0.117152		10.8898	0.201165	0.0984728	0.0812624
9.51711	0.138215	0.106947	0.035117	9.51711	0.0849475	0.106549	0.153901	9.51711	0.189639	0.197269	0.165995	9.51711	0.196509	-0.0566121	0.0843044	7.51711	0.0344391	0.0611494	0.127383	10.5171	0.30881	0.0680588	0.234114	9.51711	0.385322	0.141374	0.223646	9.51711	0.223214	0.0993288	0.347932	10.7726	0.0665785	0.163197	0.11645	9.51711	-0.0053658	0.109426	0.178018	11.7726	0.117443	0.113261		11.7726	0.180019	0.0889013	0.0722729
10.2812	0.121891	0.145159	0.0670852	10.2812	0.0921076	0.053597	0.155226	10.2812	0.195507	0.155143	0.190167	10.2812	0.139742	-0.0380447	0.149606	8.28117	-0.0162544	0.0974051	0.0704595	11.2812	0.29366	-0.063623	0.179196	10.2812	0.245567	0.160397	0.170368	10.2812	0.230212	0.123497	0.253291	11.6554	0.062436	0.132554	0.119139	10.2812	-0.00317517	0.109061	0.166725	12.6554	0.116251	0.118542		12.6554	0.180981	0.108373	0.0640395
11.0452	0.117098	0.184295	0.0854134	11.0452	0.114406	0.0722731	0.160057	11.0452	0.185876	0.195309	0.181177	11.0452	0.0802647	-0.103	0.204982	9.04523	0.0616587	0.0835642	0.0747599	12.0452	0.294531	-0.0633111	0.159158	11.0452	0.186903	0.103855	0.103386	11.0452	0.172136	0.0766654	0.108554	12.5381	0.0538734	0.122748	0.0997172	11.0452	-0.00231265	0.137741	0.177536	13.5381	0.113077	0.123412		13.5381	0.16903	0.0978427	0.0590635
11.8093	0.167677	0.171571	0.0489155	11.8093	0.0921018	0.0404224	0.148915	11.8093	0.210567	0.214855	0.110011	11.8093	0.218989	-0.047887	0.0744409	9.80929	0.110095	0.0431551	0.0349759	12.8093	0.213149	-0.0745233	0.153149	11.8093	0.241581	0.149405	0.0659884	11.8093	0.0495091	0.0970868	0.203207	13.4209	0.0177605	0.111638	0.0730115	11.8093	-0.0144461	0.128217	0.148178	14.4209	0.0932646	0.0875879		14.4209	0.16709	0.0872831	0.0280848
12.5733	0.157148	0.17282	0.0961129	12.5733	0.107084	0.0539282	0.168559	12.5733	0.204059	0.17015	0.146257	12.5733	0.132586	-0.0525885	0.0354346	10.5733	0.0846884	0.0151599	-0.00897512	13.5733	0.172883	-0.026913	0.1165	12.5733	0.196072	0.0788817	0.0298535	12.5733	0.0285939	0.00525531	0.176835	14.3037	0.0236842	0.0939657	0.0754385	12.5733	-0.0174672	0.102983	0.116684	15.3037	0.0891746	0.079912		15.3037	0.153983	0.0820604	0.0164469
13.3374	0.15499	0.160742	0.0412147	13.3374	0.141996	-0.0201759	0.131832	13.3374	0.126417	0.178815	0.0839889	13.3374	0.115562	-0.0127908	-0.0342752	11.3374	0.0380247	0.0757718	0.0407948	14.3374	0.173243	-0.0250785	0.0659866	13.3374	0.146327	0.0932965	0.0195587	13.3374	0.0906512	-0.0721004	0.132733	15.1864	0.0156361	0.0916581	0.0617172	13.3374	-0.00761188	0.0846748	0.137668	16.1864	0.106767	0.0868273		16.1864	0.133352	0.0733952	0.0280869
14.1015	0.139885	0.137326	0.0156323	14.1015	0.137146	-0.00485347	0.103419	14.1015	0.172753	0.101136	0.0567082	14.1015	0.0665605	0.0182789	-0.0552943	12.1015	-0.0749674	0.0702902	-0.00585032	15.1015	0.18954	0.0441249	0.0339147	14.1015	0.0413143	0.113631	0.101624	14.1015	-0.0791335	-0.0187053	0.0865931	16.0692	0.0182309	0.090028	0.0469567	14.1015	0.0105823	0.0709278	0.136953	17.0692	0.0931893	0.101476		17.0692	0.125868	0.0646432	0.0358193
14.8655	0.13603	0.148292	0.0543229	14.8655	0.141088	-0.0359464	0.146044	14.8655	0.126555	0.119087	0.00601265	14.8655	0.0622017	0.017381	-0.0791209	12.8655	-0.0165174	0.0932146	0.00523903	15.8655	0.160978	0.0249902	0.0999012	14.8655	0.0594538	0.0907269	0.136752	14.8655	0.0329891	0.0556956	0.108304	16.952	0.0283837	0.0918958	0.0395539	14.8655	0.0391075	0.0739389	0.16833	17.952	0.089895	0.104615		17.952	0.116812	0.0714062	0.0313532
15.6296	0.11979	0.103471	0.0356663	15.6296	0.165226	-0.0447925	0.124015	15.6296	0.0904859	0.0193245	0.0498537	15.6296	0.0511888	0.0241848	-0.120424	13.6296	-0.0611119	0.090531	0.0637776	16.6296	0.177544	0.010422	0.111331	15.6296	0.0498473	0.0607112	0.132456	15.6296	0.107116	-0.02538	0.122192	17.8347	0.017168	0.0861688	0.0286013	15.6296	0.0515086	0.0678486	0.171357	18.8347	0.0751166	0.0967274		18.8347	0.131246	0.0621069	-0.00329875
16.3936	0.0888174	0.142745	0.0477883	16.3936	0.160669	0.0180978	0.0857682	16.3936	0.0676042	-0.0218982	-0.0200183	16.3936	0.0342423	0.0432622	-0.173064	14.3936	-0.0393963	0.0203962	0.0648287	17.3936	0.0997233	-0.014941	0.141697	16.3936	0.0942945	0.136058	0.166319	16.3936	0.134662	0.00446157	-0.0267881	18.7175	0.00278962	0.0705826	0.0254413	16.3936	0.0515468	0.061455	0.121935	19.7175	0.0593261	0.0926307		19.7175	0.0871867	0.0426296	-0.00867895
17.1577	0.114943	0.167555	0.0587624	17.1577	0.114639	0.0299773	0.0232173	17.1577	0.0666405	0.0365239	-0.00457413	17.1577	0.0578571	0.0783749	-0.167092	15.1577	-0.183716	0.0764861	-0.00581541	18.1577	0.0414921	0.00372077	0.117742	17.1577	0.149417	0.0670528	0.122663	17.1577	0.059825	-0.0130899	0.0834467	19.6003	-0.00232778	0.0513242	0.0220433	17.1577	0.0227157	0.0337665	0.0785762	20.6003	0.0691356	0.088705		20.6003	0.0865528	0.0666225	-0.00374983
17.9218	0.090082	0.165217	0.0584839	17.9218	0.128232	-0.0566064	0.0822441	17.9218	0.00598517	0.0237153	0.0327959	17.9218	-0.0123386	0.0334725	-0.157284	15.9218	-0.0506786	0.0921734	-0.0265482	18.9218	0.029921	-0.00997679	0.0933489	17.9218	0.185473	-0.00204208	0.0843522	17.9218	-0.0054705	-0.00133556	0.0998824	20.4831	-0.0154391	0.0484616	0.0388383	17.9218	0.0326425	0.00978485	0.0494072	21.4831	0.0706412	0.0942638		21.4831	0.0807253	0.107178	-0.00360863
18.6858	0.0907311	0.11002	0.0736164	18.6858	0.12634	-0.0484211	0.0636661	18.6858	0.0778617	0.0679722	0.00439214	18.6858	-0.0350988	-0.0852537	-0.12985	16.6858	-0.0472778	0.100744	0.00525799	19.6858	0.0649945	-0.015753	0.125176	18.6858	0.117874	0.0160148	0.124632	18.6858	0.0986485	-0.0268085	0.0228628	21.3658	-0.0287102	0.073939	0.0619174	18.6858	0.029311	-0.0175749	0.0517012	22.3658	0.0672871	0.089567		22.3658	0.0705866	0.110167	-0.0315288
19.4499	0.0732045	0.0425	0.0740295	19.4499	0.0583385	0.0112294	0.0450144	19.4499	0.0497124	0.0671237	0.0701796	19.4499	-0.0678661	-0.107955	-0.0812661	17.4499	-0.031244	0.144442	-0.0457321	20.4499	0.0969986	-0.0433032	0.0729437	19.4499	0.0851346	0.00188369	0.109924	19.4499	0.115457	-0.0161335	0.019006	22.2486	-0.0196661	0.0864497	0.0369598	19.4499	0.0299532	-0.0377535	0.0579512	23.2486	0.0479804	0.0864651		23.2486	0.0638821	0.102038	-0.0325895
20.2139	0.0896998	-0.00126348	0.0725549	20.2139	0.119445	0.04532	0.0368133	20.2139	0.0434404	0.0206174	0.047142	20.2139	-0.0327438	-0.104211	-0.0342027	18.2139	-0.028831	0.0869457	-0.0360707	21.2139	0.0765557	0.000110193	0.0434085	20.2139	0.103364	0.073557	0.121931	20.2139	0.0608217	0.0149747	0.0347211	23.1314	-0.0100775	0.0647727	0.0169744	20.2139	0.0519517	-0.00996518	0.0418805	24.1314	0.0424879	0.102497		24.1314	0.0709359	0.0848125	-0.0036146
20.978	0.0579855	-0.00921223	0.0536593	20.978	0.0905163	0.0404767	0.1131	20.978	0.0468521	-0.0139994	0.0361415	20.978	-0.0204328	-0.152016	-0.00263574	18.978	-0.0121554	0.0689944	0.00583542	21.978	0.0461892	0.0315191	0.032163	20.978	0.0263729	0.100879	0.0838366	20.978	0.0223297	-0.125496	0.0236377	24.0141	-0.00783132	0.0516386	0.059416	20.978	0.0746469	0.00216186	0.0329373	25.0141	0.021954	0.0889876		25.0141	0.0714493	0.0910269	-0.0235407
21.7421	0.0233891	0.018179	0.0447119	21.7421	0.0850664	0.127721	0.142663	21.7421	0.0477438	-0.0290779	-0.0257599	21.7421	0.0151759	-0.117314	-0.0293211	19.7421	-0.0384891	0.0391938	0.0193179	22.7421	0.0744106	-0.0430345	0.103356	21.7421	0.0276562	0.0303713	0.0391064	21.7421	-0.00940683	-0.029636	-0.0305983	24.8969	-0.0237479	0.0334898	0.0451562	21.7421	0.0600559	0.00366713	0.017578	25.8969	0.034983	0.0823473		25.8969	0.0499097	0.0911571	-0.012215
22.5061	0.00797346	0.0637297	0.0573824	22.5061	0.117967	0.0428271	0.100512	22.5061	0.0171762	0.0267948	-3.69538e-05	22.5061	0.0751533	-0.139297	0.0138675	20.5061	-0.105407	0.0597605	-0.0126607	23.5061	0.0820901	-0.0424696	0.0759099	22.5061	0.0828785	0.00891462	0.039347	22.5061	-0.0311139	-0.00304256	-0.0396252	25.7797	-0.0325653	0.0381099	0.0200225	22.5061	0.0537538	0.0160765	0.0353714	26.7797	0.0415606	0.0810409		26.7797	0.0372622	0.0889512	-0.00655418
23.2702	-0.0024904	0.0378811	0.0134255	23.2702	0.0572569	0.0434787	0.13395	23.2702	0.0514163	-0.0704831	-0.0389303	23.2702	0.10011	-0.146941	0.0648914	21.2702	-0.136038	-0.0131095	0.00716955	24.2702	0.0403342	-0.0148755	0.109287						0.00260145	-0.0675388	-0.0270804	26.6624	-0.0682578	0.0241741	0.0333621					27.6624	0.0317197	0.0651506		27.6624	0.0151932	0.0880296	-0.0197874
24.0342	0.0558197	0.0369255	0.00284405	24.0342	0.0781505	0.039877	0.17469	24.0342	0.0509647	-0.0120807	0.0657195	24.0342	0.0319571	-0.0422572	0.0405512																	27.5452	-0.0603985	0.0142665	0.0540571					28.5452	0.0307324	0.0732806
24.7983	0.0408387	0.0391549	-0.0208309	24.7983	0.0718022	0.0872452	0.181346	24.7983	-0.0470998	0.0154957	0.0536011																					28.428	-0.0562512	0.0227122	0.0488627
25.5623	0.0525288	0.0230771	-0.016293	25.5623	0.13497	0.0063263	0.164935	25.5623	-0.022613	-0.041176	-0.00173417																					29.3107	-0.0778356	0.0282688	0.0417125
26.3264	0.0422824	0.0261871	-0.046701	26.3264	0.0351539	-0.0297685	0.144605	26.3264	0.00979742	-0.0632042	-0.0773341																					30.1935	-0.0531687	0.00128704	0.0242087
27.0905	-0.00272068	0.0188689	-0.0337649	27.0905	0.0963664	-0.0537721	0.0933544	27.0905	0.0264477	-0.0544404	-0.0638589																					31.0763	-0.0652538	-0.0107674	0.0133129
27.8545	0.00723457	0.0399519	-0.0462955	27.8545	0.116794	-0.0445178	0.0985097	27.8545	-0.0112486	-0.0136334	-0.0953918																					31.959	-0.0719183	0.00595732	-0.00738577
28.6186	0.0709313	0.048995	-0.0477199	28.6186	0.0936477	0.0590289	0.0474494	28.6186	-0.013016	-0.0522912	0.0143958																					32.8418	-0.0594812	0.000301931	0.013705
29.3826	0.0487706	0.0606074	-0.027916	29.3826	0.15522	0.0055846	0.10347	29.3826	-0.0320288	-0.033425	-0.0719291																					33.7246	-0.0752762	0.00315718	0.00859634
30.1467	0.0708065	0.0220698	0.00296653	30.1467	0.191297	0.0803882	0.0633381	30.1467	0.0564548	-0.102112	-0.0500316																					34.6073	-0.0656769	-0.0122229	0.00795506
30.9108	0.0680067	0.0435843	0.00176963	30.9108	0.101605	0.0157094	0.0535655	30.9108	0.0484836	-0.123726	0.0235426																					35.4901	-0.104596	-0.0226124	0.019221
31.6748	0.05088	0.0772996	-0.0310412	31.6748	0.167998	0.0267888	0.150779	31.6748	-0.00131385	-0.0906648	-0.033521
32.4389	0.0949351	0.0628294	0.00316122	32.4389	0.135155	-0.00894023	0.0830323	32.4389	0.0184894	-0.0342189	0.0192799
33.2029	0.0566216	0.025202	0.00280668	33.2029	0.183769	-0.0217754	0.0575624	33.2029	-0.0333074	-0.0317913	-0.0386729
33.967	0.0511067	0.00864012	0.014889	33.967	0.0701622	0.0273206	0.0393846	33.967	0.0543595	-0.106182	-0.0418048
34.7311	0.0672452	0.00419248	-0.0213897	34.7311	0.0266321	-0.0232301	0.0540125	34.7311	0.00655758	-0.119887	-0.123971
35.4951	0.0538099	-0.000329483	0.00704275	35.4951	0.0892117	-0.0525561	0.0565686	35.4951	-0.0469676	-0.100574	-0.0438621
