# Supplementary material for: Multiphoton imaging of neural structure and activity in Drosophila through the intact cuticle
Source: eLife. 2022 Jan 24;11:e69094. doi: 10.7554/eLife.69094 (PMC8846588; doi:10.7554/eLife.69094)
Supplement: Figure 5—source data 1. [file elife-69094-fig5-data1.xlsx]

## Sheet: gamma2
time	stimulus	2P_fly1	2P_fly2	2P_fly3	2P average	sem		3P_fly1	3P_fly2	3P_fly3	3P average	sem
-47.9412	0	0.450984	-0.0700602	0.0626248	0.14785	0.156332		0.482917	-0.016675	0.0203024	0.162182	0.160723
-47.7941	0	0.499833	-0.064423	0.0606923	0.165367	0.171088		0.511375	-0.00835308	0.080219	0.194414	0.16053
-47.6471	0	0.747702	-0.38137	0.0611584	0.142497	0.328462		1.4571	-1.39544	0.0826759	0.0481096	0.823638
-47.5	0	1.13835	0.441761	0.0831573	0.554424	0.309774		2.1976	-0.727028	0.0862774	0.518949	0.871543
-47.3529	0	0.450984	-0.0700602	0.0626248	0.14785	0.156332		0.482917	-0.016675	0.0203024	0.162182	0.160723
-47.2059	0	0.499833	-0.064423	0.0606923	0.165367	0.171088		0.511375	-0.00835308	0.080219	0.194414	0.16053
-47.0588	0	0.747702	-0.38137	0.0611584	0.142497	0.328462		1.4571	-1.39544	0.0826759	0.0481096	0.823638
-46.9118	0	1.13835	0.441761	0.0831573	0.554424	0.309774		2.1976	-0.727028	0.0862774	0.518949	0.871543
-46.7647	0	1.23812	0.676449	0.103767	0.672778	0.327464		3.40183	-0.284276	0.123073	1.08021	1.16675
-46.6176	0	0.86432	1.57686	0.100488	0.847221	0.426277		2.0287	1.14849	0.143028	1.10674	0.544747
-46.4706	0	0.83981	1.56879	0.0896136	0.832736	0.427015		2.00842	1.22109	0.164091	1.1312	0.534306
-46.3235	0	0.879715	1.64725	0.0947693	0.87391	0.448171		1.92412	1.21596	0.1696	1.10323	0.509613
-46.1765	0	0.702442	1.61117	0.0860437	0.799885	0.442953		1.87027	1.13673	0.163026	1.05667	0.494461
-46.0294	0	0.593482	1.6503	0.0802477	0.774678	0.462203		1.99091	1.12691	0.144689	1.0875	0.533323
-45.8824	0	0.200567	1.958	0.0811598	0.746575	0.606691		0.876889	2.54471	0.116	1.1792	0.717216
-45.7353	0	-0.193584	1.24848	0.0489328	0.367944	0.445801		0.0960115	1.87043	0.0921699	0.686203	0.592114
-45.5882	0	-0.340157	0.965083	0.00924906	0.211392	0.390111		-1.01061	1.41344	0.0468428	0.14989	0.701658
-45.4412	0	0.0576106	0.169903	0.00157574	0.0763631	0.0494882		0.265489	0.0243075	0.0212543	0.103684	0.0809076
-45.2941	0	0.0328419	0.186842	-0.00463106	0.0716842	0.0585862		0.183787	0.0128644	-0.00479726	0.0639512	0.0601342
-45.1471	0	-0.0154084	0.108801	0.000320396	0.0312378	0.0390467		0.135741	-0.0100951	-0.0140193	0.0372089	0.0492791
-45	0	0.0529719	0.076522	0.00302884	0.0441743	0.0216669		0.122058	0.0736404	-0.0339042	0.0539314	0.0460882
-44.8529	0	0.0454148	0.0552747	-0.0144548	0.0287449	0.0217866		0.0906561	0.143664	-0.0296745	0.0682151	0.051281
-44.7059	0	0.0946271	0.0483196	-0.0220925	0.0402847	0.0339327		0.152513	0.197049	-0.0170601	0.110834	0.0652265
-44.5588	0	0.102625	0.0202821	-0.00774574	0.0383872	0.0331224		0.170043	0.253862	-0.0102871	0.137873	0.0779314
-44.4118	0	0.0351528	0.0197208	0.00096182	0.0186118	0.00988564		0.152233	0.320049	-0.011408	0.153625	0.0956859
-44.2647	0	0.0323766	-0.107245	0.00378754	-0.0236935	0.042583		0.300191	0.250255	-0.0153177	0.178376	0.0979139
-44.1176	0	0.0739775	-0.0629787	0.00520994	0.00540292	0.039536		0.415757	0.255144	-0.00377263	0.222376	0.122211
-43.9706	0	0.116162	-0.0631797	-0.00469308	0.0160963	0.0528046		0.504342	0.243595	0.0311821	0.259706	0.136827
-43.8235	0	0.155183	-0.0224058	-0.00615301	0.0422082	0.0566821		0.523012	0.208751	0.0410673	0.25761	0.141254
-43.6765	0	0.205775	-0.00898478	-0.000709974	0.0653602	0.0702482		0.361859	0.227475	0.0419343	0.210423	0.0927471
-43.5294	0	0.222363	-0.022033	0.00706481	0.0691315	0.0770747		0.360912	0.157227	0.0403744	0.186171	0.093656
-43.3824	0	0.213633	-0.0472896	-0.00704224	0.0531004	0.0811028		0.42859	0.190325	0.0333457	0.21742	0.114899
-43.2353	0	0.254795	0.00922263	-0.0124809	0.0838457	0.0857042		0.418246	0.161871	0.0193385	0.199819	0.116707
-43.0882	0	0.210048	0.0351977	-0.0181368	0.0757029	0.0689143		0.410797	0.149009	0.00832673	0.189377	0.117923
-42.9412	0	0.202204	0.00633662	-0.022011	0.0621765	0.0704903		0.355935	0.109491	0.0158257	0.160417	0.101429
-42.7941	0	0.157962	0.0503875	-0.0175535	0.0635985	0.0510956		0.271531	0.142503	-0.0336488	0.126795	0.0884472
-42.6471	0	0.15178	0.0463563	-0.0149389	0.0610658	0.0486863		0.357757	0.125368	-0.0215347	0.153863	0.110415
-42.5	0	0.238189	0.029233	-0.00885547	0.0861888	0.0767913		0.493966	0.145067	-0.0131919	0.208614	0.149812
-42.3529	0	0.218948	0.0916805	-0.0369333	0.0912319	0.0738671		0.425063	0.224605	-0.0325789	0.205697	0.132448
-42.2059	0	0.278961	0.0750235	-0.040909	0.104358	0.0934961		0.362999	0.145857	-0.0314803	0.159125	0.114069
-42.0588	0	0.321584	0.00452591	-0.0371544	0.0963186	0.113274		0.262599	0.138366	-0.0238915	0.125691	0.0829452
-41.9118	0	0.405246	0.00615963	-0.0410733	0.123444	0.141559		0.175821	0.190006	-0.035535	0.110097	0.0729313
-41.7647	0	0.352242	0.0095232	-0.0209024	0.113621	0.119633		0.248874	0.208972	-0.0556832	0.134054	0.0955653
-41.6176	0	0.329495	0.021484	-0.0233285	0.109217	0.110896		0.27497	0.249949	-0.0257117	0.166402	0.0963282
-41.4706	0	0.312976	0.0160629	-0.0351383	0.097967	0.108516		0.258528	0.297563	-0.0389329	0.172386	0.106259
-41.3235	0	0.23965	0.045226	-0.0372827	0.082531	0.0820907		0.272279	0.21351	-0.035277	0.150171	0.0942632
-41.1765	0	0.264017	0.0592727	-0.0143556	0.102978	0.0832774		0.308756	0.170688	0.0127081	0.164051	0.085526
-41.0294	0	0.158158	0.0441758	0.00289155	0.0684085	0.0464304		0.262947	0.143318	0.026134	0.144133	0.0683632
-40.8824	0	0.124758	0.0767411	-0.0152889	0.0620699	0.0410881		0.276031	0.123512	0.0188681	0.13947	0.074664
-40.7353	0	0.0913892	0.0731874	-0.0214017	0.047725	0.0349604		0.315765	0.177216	0.0236832	0.172221	0.0843537
-40.5882	0	0.0817732	0.0220552	-0.0452445	0.019528	0.0366886		0.233638	0.132269	0.045829	0.137245	0.0542728
-40.4412	0	0.0666555	-0.0298198	-0.0437073	-0.00229055	0.0347053		0.30219	0.171232	0.0515571	0.174993	0.072376
-40.2941	0	0.0203619	-0.0420683	-0.0476997	-0.0231354	0.0218093		0.24306	0.113082	0.058221	0.138121	0.0548076
-40.1471	0	0.00444266	-0.00141817	-0.0502849	-0.0157535	0.0173484		0.169027	0.108339	0.0546238	0.110663	0.0330457
-40	0	-0.0535488	-0.0571729	-0.0539065	-0.0548761	0.00115306		0.207431	0.068717	0.0347444	0.103631	0.0528186
-39.8529	0	0.0213487	-0.0304661	-0.0676076	-0.025575	0.0257957		0.217251	0.0710237	0.0325148	0.10693	0.0562695
-39.7059	0	-0.00814344	0.0529077	-0.0463432	-0.000526334	0.0289033		0.260055	0.0852691	0.0637438	0.136356	0.0621608
-39.5588	0	0.00130219	0.09159	-0.036915	0.0186591	0.0380978		0.366475	0.0283058	0.0571017	0.150628	0.108243
-39.4118	0	0.028727	0.150935	-0.0196726	0.0533299	0.0507633		0.341103	0.133584	0.0334707	0.169386	0.0905919
-39.2647	0	0.0491713	0.187089	-0.023884	0.070792	0.0618546		0.406085	0.0436284	0.0349376	0.16155	0.122293
-39.1176	0	0.106186	0.215785	-0.0103594	0.10387	0.0652925		0.430189	0.0395305	0.0285808	0.1661	0.132082
-38.9706	0	0.120172	0.117155	-0.0120976	0.0750762	0.0435956		0.459902	0.0550876	0.0209873	0.178659	0.140966
-38.8235	0	0.172099	0.0937076	-0.0157808	0.083342	0.0544834		0.574375	0.00544921	0.00698851	0.195604	0.189386
-38.6765	0	0.166383	0.173468	-0.0107841	0.109689	0.0602713		0.621652	0.0382361	0.0234796	0.227789	0.196977
-38.5294	0	0.19487	0.144445	-0.0155457	0.107923	0.0634273		0.525053	0.0618655	0.0151783	0.200699	0.162736
-38.3824	0	0.182166	0.121506	-0.0217427	0.0939765	0.0604514		0.478101	0.0303279	0.0385413	0.182323	0.147908
-38.2353	0	0.176834	0.0892854	-0.0339329	0.0773955	0.0611329		0.626745	-0.0109181	0.0482202	0.221349	0.203415
-38.0882	0	0.187984	0.0803549	-0.0327302	0.0785362	0.0637212		0.511813	0.0314709	0.00986832	0.184384	0.163833
-37.9412	0	0.212681	0.0651642	-0.0353809	0.0808213	0.0720358		0.501971	0.136665	0.014065	0.217567	0.14654
-37.7941	0	0.275988	0.113289	-0.0249356	0.121447	0.086965		0.53661	0.133993	0.0128398	0.227814	0.158309
-37.6471	0	0.320763	0.182858	-0.012368	0.163751	0.0966401		0.272403	0.173724	-0.00259392	0.147844	0.0804324
-37.5	0	0.363606	0.125562	-0.0206922	0.156159	0.111987		0.237988	0.166433	-0.0276284	0.125598	0.0793488
-37.3529	0	0.403388	0.0525544	-0.0255373	0.143468	0.1319		0.371433	0.114183	-0.0477611	0.145952	0.122049
-37.2059	0	0.399923	0.0955673	-0.0375942	0.152632	0.129483		0.343008	0.143506	-0.0871466	0.133122	0.124284
-37.0588	0	0.421184	0.0777025	-0.041815	0.152357	0.138771		0.179939	0.13966	-0.0822177	0.0791271	0.081506
-36.9118	0	0.444259	0.00976722	-0.0355142	0.139504	0.152937		0.215395	0.133995	-0.0580655	0.0971082	0.0810672
-36.7647	0	0.382919	0.0707885	-0.0297211	0.141329	0.124231		0.290334	0.0678469	-0.0646735	0.0978359	0.103573
-36.6176	0	0.369569	0.0840705	-0.0345084	0.13971	0.119919		0.172858	0.0757205	-0.0500402	0.0661793	0.0645217
-36.4706	0	0.304072	0.0517518	-0.0537158	0.100703	0.106145		0.31353	0.0902628	-0.0551217	0.116224	0.107209
-36.3235	0	0.214753	0.0305353	-0.0502018	0.065029	0.0784064		0.339955	0.0621185	-0.0436779	0.119465	0.114397
-36.1765	0	0.184951	0.101697	-0.046943	0.0799017	0.0678232		0.305211	0.154311	-0.0227173	0.145602	0.0947648
-36.0294	0	0.174824	0.0742524	-0.0334393	0.0718791	0.0601322		0.2705	0.22701	0.0241963	0.173902	0.0758985
-35.8824	0	0.219091	0.0682549	-0.0137637	0.091194	0.0681908		0.305706	0.205039	0.017472	0.176072	0.084457
-35.7353	0	0.30035	0.173829	-0.0144645	0.153238	0.0914605		0.375192	0.150792	0.0135856	0.179857	0.105394
-35.5882	0	0.292533	0.1141	-0.0155266	0.130369	0.0893004		0.207937	0.129671	0.0239962	0.120535	0.0532952
-35.4412	0	0.235114	0.115578	-0.012961	0.112577	0.0716287		0.232283	0.128407	0.00260211	0.121097	0.0664038
-35.2941	0	0.25976	0.127651	-0.00174227	0.128556	0.0754905		0.22358	0.0995611	0.00774245	0.110295	0.0625378
-35.1471	0	0.320989	0.158174	0.0174811	0.165548	0.0876928		0.202801	0.122311	0.0129119	0.112675	0.0550277
-35	0	0.300359	0.0560205	0.0233973	0.126592	0.0873921		0.208271	0.0306827	0.00831585	0.0824233	0.0632544
-34.8529	0	0.347898	0.0621471	0.0234588	0.144501	0.10231		0.185213	0.0150641	-0.00456221	0.0652381	0.0602542
-34.7059	0	0.307118	0.115693	0.0242057	0.149006	0.083351		0.143725	-0.0181107	0.000652362	0.0420888	0.0511058
-34.5588	0	0.30703	0.0677689	0.0205292	0.131776	0.0886817		0.147644	0.00332829	0.00314746	0.0513731	0.0481352
-34.4118	0	0.368347	0.0541419	0.0135143	0.145335	0.112122		0.257898	0.0526708	-0.00196742	0.102867	0.0791037
-34.2647	0	0.322558	0.015621	0.0189958	0.119058	0.101755		0.36168	0.101131	0.00825374	0.157021	0.105783
-34.1176	0	0.351762	0.0681623	0.00617212	0.142032	0.106381		0.390211	0.140716	0.0294692	0.186799	0.106656
-33.9706	0	0.302765	0.0494839	-0.0187343	0.111171	0.0977998		0.298067	0.125594	0.00767496	0.143779	0.0843207
-33.8235	0	0.335523	0.0796334	-0.0103186	0.134946	0.103596		0.267704	0.121558	-0.0256782	0.121195	0.0846924
-33.6765	0	0.299898	0.0690025	-0.0191025	0.116599	0.0951128		0.377408	0.0546422	-0.0337939	0.132752	0.124963
-33.5294	0	0.320675	0.0236699	-0.0201607	0.108061	0.107057		0.440811	0.122593	-0.00574959	0.185885	0.132739
-33.3824	0	0.207368	0.0475504	-0.022634	0.0774282	0.0680558		0.418403	0.165332	0.0044069	0.196047	0.120493
-33.2353	0	0.170412	0.0419495	-0.0240235	0.0627794	0.0570868		0.475037	0.0777438	0.016025	0.189602	0.143825
-33.0882	0	0.238883	0.0283503	-0.0234145	0.0812729	0.0802093		0.457707	0.0302321	0.0111903	0.166377	0.145769
-32.9412	0	0.183096	-0.0822973	-0.0201911	0.0268691	0.0801444		0.45741	0.0414152	-0.0147029	0.161374	0.148902
-32.7941	0	0.317166	-0.126114	-0.00558915	0.0618211	0.132328		0.475185	0.0346712	0.00614905	0.172002	0.151815
-32.6471	0	0.357445	-0.0467999	-0.0053448	0.101767	0.128398		0.467526	0.027861	0.0400761	0.178488	0.144562
-32.5	0	0.36386	-0.0535741	0.0130142	0.107767	0.129481		0.460867	-0.00849526	0.0420177	0.164797	0.148752
-32.3529	0	0.417958	0.022229	0.00177495	0.14732	0.135447		0.453541	-0.0325543	0.0242106	0.148399	0.153449
-32.2059	0	0.45275	-0.00741967	-0.00224166	0.147696	0.152534		0.39575	-0.0499357	0.0124719	0.119429	0.13933
-32.0588	0	0.422668	0.0313257	0.00787155	0.153955	0.134527		0.461445	-0.0112264	0.0142884	0.154836	0.153482
-31.9118	0	0.482441	0.0826509	0.00829022	0.191127	0.14723		0.566739	-0.00301958	0.0328109	0.198843	0.184238
-31.7647	0	0.493025	0.166618	0.0236503	0.227764	0.138903		0.471864	-0.0909326	0.0605906	0.147174	0.168134
-31.6177	0	0.343426	0.188629	0.0117338	0.181263	0.0958222		0.586304	-0.0320137	0.057417	0.203903	0.192936
-31.4706	0	0.30761	0.0904113	-0.00185778	0.132055	0.0917301		0.596972	0.00311675	0.0592977	0.219796	0.189284
-31.3235	0	0.499198	0.12778	-0.0200522	0.202309	0.154457		0.525642	0.0563193	0.0587398	0.213567	0.156039
-31.1765	0	0.441896	0.0195878	-0.0170733	0.148137	0.14726		0.563442	0.0338959	0.0452981	0.214212	0.174646
-31.0294	0	0.410272	0.123484	-0.00689062	0.175622	0.123214		0.522263	0.0378215	0.0669505	0.209012	0.156851
-30.8823	0	0.365303	0.0725465	-0.0130763	0.141591	0.114554		0.416292	0.0672816	0.0639181	0.182497	0.116902
-30.7353	0	0.315868	0.0912539	-0.0190721	0.12935	0.0985473		0.308559	0.118434	0.0618072	0.162933	0.0746252
-30.5882	0	0.309274	0.0573297	-0.034105	0.110833	0.102671		0.408113	0.177918	0.0644244	0.216818	0.101103
-30.4412	0	0.437083	0.050333	-0.0252723	0.154048	0.143191		0.334922	0.108835	0.063305	0.169021	0.0839855
-30.2941	0	0.410606	0.111658	-0.0347468	0.162506	0.131052		0.285161	0.137226	0.05559	0.159326	0.0671864
-30.1471	0	0.170707	0.15085	-0.0164491	0.101703	0.0593533		0.257476	0.124778	0.0681063	0.15012	0.0561155
-30	0	0.204815	0.205342	-0.0223321	0.129275	0.0758038		0.17957	0.187523	0.0699322	0.145675	0.0379409
-29.8529	0	0.223631	0.135145	-0.0298948	0.109627	0.0742905		0.264324	0.192109	0.0360649	0.164166	0.0673576
-29.7059	0	0.291794	0.19759	-0.0317205	0.152555	0.096067		0.275803	0.159892	0.0241378	0.153278	0.0727246
-29.5588	0	0.254221	0.191753	-0.0372724	0.136234	0.0886075		0.302096	0.0681077	0.0282757	0.132826	0.0854122
-29.4118	0	0.283646	0.187595	-0.0320245	0.146405	0.0934245		0.407144	0.102878	0.0129706	0.174331	0.119265
-29.2647	0	0.162589	0.271467	-0.0148787	0.139726	0.0834477		0.405412	0.0790875	0.0398979	0.174799	0.11586
-29.1177	0	0.177675	0.334985	-0.00575846	0.168967	0.0984605		0.473673	0.054575	0.0432051	0.190484	0.141632
-28.9706	0	0.291091	0.273699	-0.0189546	0.181945	0.100575		0.496541	0.0492004	0.0314699	0.192404	0.152155
-28.8235	0	0.314375	0.229671	-0.0082816	0.178588	0.0965815		0.554666	-0.0229895	0.0147491	0.182142	0.186581
-28.6765	0	0.354675	0.241207	-0.00950849	0.195458	0.10759		0.483287	-0.0569	0.0283102	0.151566	0.167675
-28.5294	0	0.373039	0.323868	0.00101399	0.23264	0.11668		0.462137	-0.0697606	0.0358722	0.142749	0.162579
-28.3823	0	0.369369	0.349256	0.0126823	0.243769	0.115689		0.356261	-0.0229613	0.0288085	0.120703	0.118723
-28.2353	0	0.458353	0.3473	0.00221598	0.26929	0.137331		0.24889	-0.039576	0.00103166	0.0701152	0.0901528
-28.0882	0	0.455938	0.304106	-0.0169326	0.247704	0.139389		0.186908	0.00974872	-0.0458948	0.0502539	0.0701896
-27.9412	0	0.492847	0.222411	-0.027737	0.229174	0.150318		0.234503	0.00635616	-0.0600752	0.0602614	0.0892066
-27.7941	0	0.399093	0.216504	-0.0305839	0.195004	0.124502		0.175672	-0.0181314	-0.0676628	0.0299593	0.0742462
-27.6471	0	0.342397	0.32211	-0.0336252	0.210294	0.1221		0.0918172	0.0551493	-0.0564242	0.0301808	0.0445775
-27.5	0	0.298347	0.316803	-0.0293079	0.195281	0.112421		0.0261048	0.0680732	-0.0603913	0.0112622	0.0378198
-27.3529	0	0.267386	0.232455	-0.0423683	0.152491	0.09795		0.0151047	0.153137	-0.0540816	0.0380534	0.0609094
-27.2059	0	0.247502	0.232612	-0.0723317	0.135927	0.104218		0.142882	0.0888739	-0.0619623	0.0565978	0.061296
-27.0588	0	0.200912	0.223273	-0.0783223	0.115288	0.09702		0.132961	0.129263	-0.0475299	0.0715646	0.0595568
-26.9118	0	0.227494	0.261982	-0.0702828	0.139731	0.105478		0.261445	0.122521	-0.0302034	0.117921	0.0842232
-26.7647	0	0.181612	0.342269	-0.0466344	0.159082	0.112831		0.155265	0.231998	-0.00569048	0.127191	0.0700358
-26.6177	0	0.185658	0.29689	-0.0392138	0.147778	0.0988562		0.175445	0.27708	0.00852512	0.153683	0.0782849
-26.4706	0	0.146173	0.253939	-0.0282009	0.123971	0.0822		0.2884	0.194926	0.00140097	0.161576	0.084511
-26.3235	0	0.195231	0.225291	-0.0303744	0.130049	0.0806797		0.411798	0.258838	-0.00458152	0.222018	0.1216
-26.1765	0	0.214289	0.196423	-0.029258	0.127152	0.0783747		0.519872	0.19993	-0.0161231	0.23456	0.155694
-26.0294	0	0.238665	0.164313	-0.00984351	0.131045	0.0736415		0.464565	0.256942	-0.00736863	0.238046	0.136563
-25.8823	0	0.152146	0.19596	0.01764	0.121915	0.0536499		0.534763	0.184138	0.00948063	0.242794	0.154446
-25.7353	0	0.130784	0.129027	0.0136639	0.0911583	0.0387505		0.452134	0.248689	0.0110602	0.237294	0.127454
-25.5882	0	0.158833	0.0485469	-8.91798e-05	0.0690968	0.0470133		0.504485	0.183576	-0.0227428	0.221773	0.153391
-25.4412	0	0.151355	0.0786694	-0.0107545	0.07309	0.04688		0.575943	0.173648	-0.0419669	0.235875	0.181069
-25.2941	0	0.132447	0.0685048	-0.0200948	0.0602857	0.0442263		0.495225	0.215768	-0.0205881	0.230135	0.149076
-25.1471	0	0.0862432	0.132359	-0.0161252	0.0674923	0.043877		0.509716	0.156445	0.00937658	0.225179	0.148468
-25	0	0.102401	0.200517	-0.00728771	0.0985433	0.060019		0.428376	0.165412	0.0491056	0.214298	0.112181
-24.8529	0	0.123726	0.181539	0.00434448	0.103203	0.0521707		0.440582	0.163453	0.0466639	0.2169	0.116812
-24.7059	0	0.171682	0.128578	-0.0136977	0.095521	0.056009		0.313247	0.202693	0.0337503	0.18323	0.0812686
-24.5588	0	0.222689	0.159176	-0.0116642	0.1234	0.0699768		0.285171	0.12954	0.0413296	0.152013	0.0712821
-24.4118	0	0.183332	0.175801	-0.0141353	0.114999	0.0646039		0.29337	0.0322857	0.0584317	0.128029	0.0830141
-24.2647	0	0.270282	0.189851	0.0143678	0.158167	0.0755555		0.293137	0.00271775	0.0780923	0.124649	0.0870085
-24.1177	0	0.344137	0.164156	0.013788	0.174027	0.0954913		0.290732	-0.0458721	0.0865203	0.11046	0.0979038
-23.9706	0	0.335405	0.0657038	0.030852	0.143987	0.0962364		0.317464	-0.0613111	0.0854818	0.113878	0.110261
-23.8235	0	0.308891	0.0166067	0.0222106	0.115903	0.0965075		0.323351	-0.0879658	0.0639073	0.0997641	0.120083
-23.6765	0	0.295216	0.0897374	0.0177189	0.134224	0.0831375		0.239852	-0.103346	0.0671889	0.0678986	0.0990734
-23.5294	0	0.278369	0.0927968	0.0213734	0.130846	0.0765887		0.365832	-0.0893192	0.0801645	0.118892	0.13281
-23.3823	0	0.240446	0.157433	0.0302863	0.142722	0.0611121		0.384819	-0.008637	0.0724158	0.149533	0.119947
-23.2353	0	0.231399	0.129983	0.0474131	0.136265	0.0532049		0.326932	0.0526076	0.0812639	0.153601	0.0870593
-23.0882	0	0.134195	0.102372	0.0446666	0.0937448	0.0262023		0.29383	0.0429464	0.0793937	0.138723	0.0782637
-22.9412	0	0.0934578	0.0954122	0.0483374	0.0790691	0.0153762		0.274681	0.0603863	0.0787439	0.137937	0.0685771
-22.7941	0	0.139071	0.158701	0.0327319	0.110168	0.0391305		0.125457	0.0665444	0.0708468	0.0876159	0.018961
-22.6471	0	0.142312	0.223733	0.0470626	0.137703	0.0510525		0.0813304	0.0596246	0.078065	0.0730067	0.0067571
-22.5	0	0.06641	0.121585	0.0607493	0.0829149	0.0194041		0.151806	0.101069	0.0932279	0.115367	0.0183591
-22.3529	0	0.076186	0.217108	0.0756161	0.12297	0.0470692		0.152421	-0.00390706	0.113753	0.0874225	0.0470093
-22.2059	0	0.0654481	0.199719	0.0704098	0.111859	0.0439534		0.169362	-0.0770298	0.122664	0.0716655	0.0755599
-22.0588	0	0.0898816	0.222578	0.0744897	0.128983	0.0470078		0.166121	-0.0186493	0.128741	0.0920709	0.056402
-21.9118	0	0.11627	0.227907	0.0693997	0.137859	0.0470132		0.170306	-0.0332872	0.13729	0.0914363	0.0630859
-21.7647	0	0.175522	0.244191	0.0771351	0.165616	0.0484786		0.25387	0.0166894	0.130699	0.133753	0.0684852
-21.6177	0	0.0933315	0.223243	0.087216	0.134597	0.0443584		0.285457	0.0552976	0.169124	0.16996	0.0664427
-21.4706	0	0.0832969	0.131412	0.103208	0.105972	0.0139582		0.294021	0.0689803	0.196684	0.186562	0.0651604
-21.3235	0	0.105048	0.210616	0.101289	0.138984	0.0358325		0.246989	0.00131234	0.213834	0.154045	0.0769638
-21.1765	0	0.0681004	0.133737	0.0936276	0.0984884	0.019103		0.270823	0.118848	0.222697	0.204123	0.0448434
-21.0294	0	-0.00642697	0.0355954	0.109494	0.0462209	0.0338827		0.276938	0.141154	0.240713	0.219602	0.0405941
-20.8823	0	-0.0482292	0.0554758	0.0884379	0.0318948	0.0411765		0.293644	0.0617631	0.262023	0.20581	0.0725996
-20.7353	0	-0.0363702	0.0916064	0.0991826	0.0514729	0.043976		0.372985	0.154823	0.26161	0.263139	0.0629826
-20.5882	0	-0.102852	0.131025	0.0956293	0.0412674	0.0727806		0.261266	0.130405	0.285138	0.225603	0.0480954
-20.4412	0	-0.0138388	0.125663	0.0918521	0.067892	0.0420148		0.223296	0.0524309	0.24885	0.174859	0.0616569
-20.2941	0	-0.033815	0.182798	0.0792402	0.0760744	0.0625509		0.336605	0.124903	0.22351	0.228339	0.0611609
-20.1471	0	0.0587343	0.272083	0.0745543	0.135124	0.0686316		0.39142	0.111506	0.206731	0.236552	0.0821685
-20	0	0.061858	0.262305	0.0793544	0.134506	0.064099		0.204949	0.120977	0.202467	0.176131	0.0275864
-19.8529	0	0.0743482	0.307648	0.073212	0.151736	0.0779565		0.26555	0.151331	0.208301	0.208394	0.0329721
-19.7059	0	0.135745	0.292412	0.0885895	0.172249	0.0616042		0.267734	0.16157	0.202669	0.210658	0.0309062
-19.5588	0	0.0508279	0.258521	0.083169	0.130839	0.0645198		0.114143	0.0462094	0.200146	0.120166	0.0445395
-19.4118	0	0.0684508	0.179105	0.0802129	0.109256	0.0350891		0.204328	0.0397438	0.18332	0.142464	0.0517169
-19.2647	0	-0.0198167	0.181597	0.0693647	0.0770482	0.0582698		0.263559	0.0553931	0.183457	0.16747	0.0606218
-19.1177	0	-0.0312114	0.117712	0.0798373	0.0554461	0.044687		0.182504	0.0428924	0.181406	0.135601	0.0463552
-18.9706	0	-0.113351	-0.0102906	0.0906433	-0.0109994	0.0588892		0.0332763	0.0720984	0.17709	0.0941551	0.0429554
-18.8235	0	-0.102701	0.0362246	0.100133	0.0112189	0.0598733		0.126506	0.0260076	0.157262	0.103259	0.0396328
-18.6765	0	-0.0377928	0.108585	0.0939953	0.0549291	0.0465518		0.0181405	0.0217252	0.118825	0.0528971	0.0329804
-18.5294	0	-0.114311	0.15938	0.0840937	0.0430541	0.081629		-0.0087892	0.0213068	0.0993523	0.03729	0.0322244
-18.3823	0	-0.0374244	0.119062	0.0766343	0.0527573	0.0467246		0.041416	0.127036	0.0949914	0.0878145	0.0249755
-18.2353	0	-0.0819855	0.240218	0.0859565	0.0813962	0.09304		0.100947	0.143946	0.0923495	0.112414	0.0159599
-18.0882	0	-0.0842502	0.228881	0.103486	0.0827055	0.0909883		0.0492223	0.186311	0.0916537	0.109062	0.0405202
-17.9412	0	-0.0777826	0.244213	0.0976903	0.0880402	0.0930772		0.0455042	0.116805	0.0622685	0.0748592	0.021524
-17.7941	0	-0.0368401	0.249	0.0819187	0.0980263	0.0829071		0.26091	0.188257	0.0539064	0.167691	0.060635
-17.6471	0	-0.00769202	0.178202	0.0622622	0.0775907	0.0542075		0.232796	0.2074	0.0357222	0.158639	0.0618943
-17.5	0	-0.0199048	0.0923335	0.0461123	0.0395137	0.032568		0.324133	0.125305	0.0426545	0.164031	0.083531
-17.3529	0	0.00504969	-0.00653693	0.0581551	0.0188893	0.0199158		0.332442	0.106566	0.0593448	0.166117	0.084272
-17.2059	0	-0.0239134	0.0258903	0.0613289	0.021102	0.0247235		0.307005	0.110732	0.0622589	0.159998	0.0748232
-17.0588	0	0.0308906	-0.0414612	0.0475469	0.0123255	0.0273198		0.210447	0.17228	0.0482832	0.14367	0.0489495
-16.9118	0	0.136698	-0.0713557	0.0350046	0.0334488	0.0600649		0.221086	0.154078	0.043465	0.139543	0.0517873
-16.7647	0	0.140953	-0.0806693	0.00833803	0.0228741	0.0643885		0.116279	0.218651	0.0372197	0.12405	0.0525186
-16.6177	0	0.128862	-0.060861	0.00958656	0.0258625	0.0553696		-0.00193643	0.122577	0.0079306	0.0428571	0.0399616
-16.4706	0	0.116805	-0.0177885	0.0202072	0.0397411	0.0400625		-0.00561099	0.0975894	0.0363728	0.0427837	0.0299633
-16.3235	0	0.17349	0.0332509	0.0347931	0.0805114	0.0464915		-0.0550547	0.176287	0.0505988	0.0572771	0.066866
-16.1765	0	0.152476	0.111318	0.0405289	0.101441	0.0326915		-0.0203772	0.212158	0.0223516	0.0713776	0.071463
-16.0294	0	0.163497	0.141459	0.0197316	0.108229	0.0447039		0.0761738	0.149019	0.0191269	0.0814398	0.0375888
-15.8824	0	0.258646	0.141399	0.0168626	0.138969	0.0698075		0.0907225	0.0437266	0.0190137	0.0511542	0.0210311
-15.7353	0	0.209477	0.363637	0.0166947	0.196603	0.10036		0.13025	0.0559427	-0.00130567	0.0616291	0.0380832
-15.5882	0	0.248778	0.365571	0.0374935	0.217281	0.0960082		0.147719	0.0133276	0.0186816	0.0599094	0.043932
-15.4412	0	0.250095	0.309472	0.0326734	0.197414	0.0841346		0.121978	0.0878103	0.0392717	0.0830201	0.0239952
-15.2941	0	0.192482	0.401866	0.00814214	0.20083	0.113735		0.091269	0.0686292	0.0211247	0.060341	0.0206686
-15.1471	0	0.198221	0.393651	-0.00474322	0.19571	0.115013		0.135805	0.022475	0.0169769	0.058419	0.0387256
-15	0	0.202436	0.328647	-0.0319297	0.166384	0.105639		0.0135553	-0.011432	0.0282505	0.0101246	0.011583
-14.8529	0	0.226924	0.386096	-0.00707768	0.201981	0.114182		0.0105403	0.00747498	0.0400916	0.019369	0.010399
-14.7059	0	0.189799	0.391828	0.00175462	0.19446	0.112629		-0.0213342	0.0243014	0.0583403	0.0204358	0.0230811
-14.5588	0	0.184147	0.243144	0.0174266	0.148239	0.0675872		-0.0085825	0.0774642	0.0837262	0.0508693	0.0297808
-14.4118	0	0.153854	0.313943	-0.00653999	0.153752	0.0925154		0.0958739	0.101544	0.0777067	0.0917084	0.00718965
-14.2647	0	0.18178	0.402829	-0.0198004	0.188269	0.122046		0.17251	0.0616244	0.0838918	0.106009	0.0338661
-14.1176	0	0.224205	0.299816	-0.0110825	0.17098	0.0936112		0.2643	0.0688089	0.0981545	0.143754	0.0608652
-13.9706	0	0.240295	0.333031	-0.00676881	0.188853	0.101408		0.341276	0.0474931	0.0822586	0.157009	0.0926782
-13.8235	0	0.277967	0.354223	0.0177822	0.216657	0.101845		0.483256	0.0341707	0.0945206	0.203982	0.140719
-13.6765	0	0.302082	0.287675	0.00824134	0.199333	0.0956362		0.35261	0.032288	0.0727468	0.152548	0.10071
-13.5294	0	0.398825	0.271404	-0.0132285	0.219	0.121801		0.508332	0.00341495	0.0406722	0.18414	0.162452
-13.3824	0	0.443747	0.278859	-0.0439668	0.226213	0.14323		0.58932	-0.0288678	0.0301277	0.19686	0.196968
-13.2353	0	0.414712	0.274589	-0.0295309	0.219923	0.131122		0.520238	-0.0548651	0.0428373	0.169404	0.17767
-13.0882	0	0.400585	0.223323	-0.013296	0.203537	0.119886		0.455331	-0.0672834	0.0572147	0.148421	0.157607
-12.9412	0	0.395978	0.251029	-0.00287755	0.21471	0.116563		0.512671	-0.0779725	0.0429599	0.159219	0.180141
-12.7941	0	0.388299	0.39635	-0.00711437	0.259178	0.133167		0.408669	0.0421452	0.0511012	0.167305	0.120709
-12.6471	0	0.451043	0.389369	-0.0324003	0.269337	0.151916		0.319861	0.110541	-0.00509192	0.14177	0.0950964
-12.5	0	0.416729	0.415497	-0.0546271	0.2592	0.156914		0.252858	0.100081	-0.02738	0.10852	0.0810077
-12.3529	0	0.264376	0.393725	-0.0503984	0.202567	0.131879		0.146072	0.115966	-0.0119183	0.0833734	0.048432
-12.2059	0	0.250422	0.340248	-0.0338814	0.185596	0.112761		0.0807124	0.0486578	-0.00834109	0.040343	0.0260415
-12.0588	0	0.27321	0.311608	-0.0191461	0.188557	0.104441		0.0779797	0.0774829	-0.0206925	0.0449234	0.0328082
-11.9118	0	0.255871	0.325577	-0.0167095	0.188246	0.104435		0.19844	0.0962936	-0.0484658	0.0820891	0.0716284
-11.7647	0	0.284839	0.299421	-0.0285968	0.185221	0.106992		0.110128	0.143908	-0.0871745	0.0556205	0.0720604
-11.6176	0	0.274481	0.11397	-0.0424903	0.11532	0.0915043		0.0847364	0.256464	-0.123909	0.0724303	0.109976
-11.4706	0	0.169463	0.165665	-0.0321438	0.100995	0.0665783		0.138275	0.209521	-0.0835359	0.0880869	0.0882417
-11.3235	0	0.122155	0.135087	-0.00843602	0.0829353	0.0458379		0.244797	0.250606	-0.038617	0.152262	0.0954544
-11.1765	0	0.199599	0.184864	0.00965487	0.131373	0.0610074		0.213218	0.240888	-0.028047	0.14202	0.0854077
-11.0294	0	0.20748	0.218465	-0.00281848	0.141042	0.0720002		0.188323	0.255614	-0.0459206	0.132672	0.0913848
-10.8824	0	0.234562	0.248275	-0.0271904	0.151882	0.0896239		0.278081	0.254801	-0.0613288	0.157184	0.109463
-10.7353	0	0.216117	0.225895	-0.0407863	0.133742	0.0873096		0.214879	0.249539	-0.0555301	0.136296	0.0964336
-10.5882	0	0.18092	0.268226	-0.0380743	0.137024	0.0911046		0.25542	0.26342	-0.0140251	0.168272	0.0911777
-10.4412	0	0.0977418	0.291859	-0.019354	0.123416	0.090752		0.254789	0.0235215	-0.00725336	0.0903524	0.0826969
-10.2941	0	0.206773	0.264228	-0.037797	0.144401	0.0925967		0.213785	0.0314734	-0.022138	0.0743733	0.071403
-10.1471	0	0.300678	0.318258	-0.0537846	0.188384	0.12119		0.267792	0.0521903	-0.0547731	0.0884032	0.0948607
-10	0	0.173356	0.30659	-0.0718738	0.136024	0.110836		0.278415	0.0842144	-0.0762485	0.0954601	0.102537
-9.85294	0	0.101426	0.244281	-0.0740341	0.0905578	0.0920503		0.300951	0.107663	-0.0698297	0.112928	0.107067
-9.70588	0	0.131162	0.223676	-0.055944	0.0996314	0.0822446		0.236268	0.109376	-0.058047	0.0958657	0.0852295
-9.55882	0	0.134357	0.267889	-0.0456526	0.118865	0.0908426		0.269664	0.09333	-0.0434571	0.106512	0.0906302
-9.41177	0	0.144366	0.243512	-0.0566634	0.110405	0.0883013		0.284128	0.0942174	-0.0601989	0.106049	0.0995744
-9.26471	0	0.172592	0.245161	-0.0648229	0.117643	0.0936074		0.301478	0.181288	-0.0494829	0.144428	0.102976
-9.11765	0	0.113604	0.191649	-0.0529955	0.0840857	0.0721485		0.232129	0.151351	-0.0379717	0.115169	0.0800425
-8.97059	0	0.0585211	0.179976	-0.0445719	0.0646419	0.0648937		0.219696	0.126212	-0.019086	0.108941	0.0694693
-8.82353	0	0.105374	0.14903	-0.030736	0.0745559	0.0541333		0.275658	0.130243	-0.0175629	0.129446	0.0846467
-8.67647	0	0.314841	0.193235	-0.00603346	0.167348	0.0935286		0.26454	0.149544	0.000168043	0.138084	0.0765325
-8.52941	0	0.344571	0.181128	-0.0117755	0.171308	0.102985		0.386122	0.193064	-0.016717	0.18749	0.116323
-8.38235	0	0.381244	0.157977	-0.027338	0.170627	0.118117		0.330818	0.244446	-0.0375006	0.179254	0.111209
-8.23529	0	0.325789	0.189866	-0.0198065	0.165283	0.100519		0.340178	0.226083	-0.031905	0.178119	0.110056
-8.08823	0	0.26213	0.286874	-0.0167826	0.177407	0.0973573		0.376903	0.195095	-0.0148869	0.185704	0.113198
-7.94118	0	0.29909	0.362466	-0.0093457	0.217404	0.114841		0.502742	0.246325	-0.0156548	0.244471	0.149651
-7.79412	0	0.283995	0.332595	-0.016383	0.200069	0.109132		0.406023	0.247536	-0.0350417	0.206173	0.128993
-7.64706	0	0.250819	0.305038	-0.0296694	0.175396	0.10372		0.288614	0.291027	-0.0375478	0.180698	0.109125
-7.5	0	0.134618	0.336117	-0.0557187	0.138339	0.113129		0.320415	0.23315	-0.0558687	0.165899	0.113709
-7.35294	0	0.0512339	0.342254	-0.0677714	0.108572	0.121787		0.16561	0.102235	-0.0456053	0.0740797	0.0625765
-7.20588	0	0.0159351	0.344338	-0.0498462	0.103476	0.121919		0.0642816	0.0502449	-0.0370438	0.0258276	0.0316958
-7.05882	0	0.0327665	0.379397	-0.0420034	0.123387	0.129812		0.0732553	0.00848496	-0.0239168	0.0192745	0.0285652
-6.91176	0	0.196593	0.302986	-0.0287279	0.15695	0.0977875		-0.00780893	0.00887187	-0.0484194	-0.0157855	0.0170127
-6.76471	0	0.182752	0.256343	-0.0417613	0.132445	0.0896562		0.0712872	0.00534432	-0.0716984	0.00164437	0.0413178
-6.61765	0	0.271484	0.29797	-0.0387983	0.176885	0.108113		0.219032	-0.0287193	-0.0767795	0.0378445	0.0916501
-6.47059	0	0.285714	0.310311	-0.0430959	0.18431	0.113924		0.149921	-0.113025	-0.0767366	-0.0132802	0.0822704
-6.32353	0	0.207398	0.244521	-0.0272651	0.141551	0.0850857		0.0591005	-0.114178	-0.0673631	-0.0408136	0.0517527
-6.17647	0	0.238883	0.200193	-0.0199899	0.139695	0.08062		0.023387	-0.0762687	-0.0532115	-0.0353644	0.0301203
-6.02941	0	0.251607	0.207122	-0.0242151	0.144838	0.0854965		0.122521	0.00354419	-0.0548252	0.0237467	0.0521825
-5.88235	0	0.283673	0.16604	-0.0477096	0.134001	0.096994		0.115321	0.0107356	-0.0938022	0.0107513	0.0603685
-5.73529	0	0.122223	0.112128	-0.0623719	0.0573265	0.0599201		0.159564	-0.0139705	-0.112814	0.0109264	0.0796079
-5.58824	0	0.0920342	0.178055	-0.0626395	0.0691498	0.0704183		0.116514	-0.0285404	-0.103207	-0.00507769	0.0645039
-5.44118	0	0.0206048	0.196246	-0.0629018	0.0513163	0.0763692		0.110233	0.0509004	-0.091534	0.0231998	0.0598692
-5.29412	0	0.0660914	0.273694	-0.0441511	0.0985448	0.0931778		0.240315	0.0888155	-0.0833314	0.081933	0.093492
-5.14706	0	0.0835611	0.305247	-0.053617	0.11173	0.104548		0.286998	0.123949	-0.0921092	0.106279	0.109795
-5	0	0.0030995	0.353091	-0.0531853	0.101002	0.127087		0.276153	0.0809379	-0.0997737	0.0857725	0.108548
-4.85294	0	-0.0382737	0.33517	-0.0669645	0.0766438	0.129528		0.289126	-0.0189014	-0.135935	0.0447632	0.126766
-4.70588	0	-0.0425625	0.368193	-0.0555134	0.0900391	0.139127		0.180245	0.0209168	-0.0808273	0.0401116	0.0759738
-4.55882	0	0.0439022	0.361548	-0.0446426	0.120269	0.123318		0.244417	0.0263601	-0.0410521	0.0765749	0.0861477
-4.41176	0	0.0478846	0.324595	-0.0228026	0.116559	0.106001		0.211998	0.0524362	-0.0258211	0.0795377	0.0699771
-4.26471	0	0.0439999	0.307608	-0.0238435	0.109255	0.101092		0.245921	-0.000485376	-0.0223802	0.0743518	0.0860171
-4.11765	0	0.0553239	0.284792	-0.0290046	0.103704	0.0937594		0.260273	-0.0408745	-0.0384845	0.0603048	0.0999867
-3.97059	0	0.0200924	0.339956	-0.0392826	0.106922	0.117771		0.232855	-0.0068457	-0.0300523	0.065319	0.0840354
-3.82353	0	0.0430586	0.300535	-0.0591969	0.0947989	0.10702		0.303782	0.0734164	-0.0339099	0.11443	0.0996168
-3.67647	0	0.0432441	0.255494	-0.0453492	0.0844628	0.0892578		0.257906	0.153894	0.00501279	0.138937	0.0733859
-3.52941	0	0.086278	0.171771	-0.0333071	0.0749141	0.0594731		0.334382	0.17207	0.00154506	0.169332	0.0960915
-3.38235	0	0.0644472	0.311285	-0.0367086	0.113008	0.10335		0.359207	0.224878	-0.0200004	0.188028	0.111008
-3.23529	0	0.0191927	0.283186	-0.0529106	0.0831559	0.102158		0.302414	0.171703	-0.046109	0.142669	0.101652
-3.08824	0	0.0788843	0.270126	-0.0627586	0.0954171	0.0964503		0.181295	0.132678	-0.0558574	0.0860387	0.0723228
-2.94118	0	0.0163264	0.25323	-0.063155	0.0688003	0.0950262		0.0582672	0.171537	-0.0510069	0.0595991	0.0642464
-2.79412	0	0.0433539	0.191981	-0.0563585	0.0596589	0.0721516		0.0906813	0.14946	-0.0355934	0.0681827	0.054592
-2.64706	0	0.192705	0.225604	-0.0348364	0.127824	0.0818828		0.108877	0.129714	-0.0328682	0.0685745	0.0510768
-2.5	0	0.22781	0.212224	-0.0461931	0.13128	0.0888507		0.115696	0.0684837	-0.0508674	0.0444373	0.049563
-2.35294	0	0.151436	0.302779	-0.0492474	0.134989	0.101953		0.123853	0.0155805	-0.0911348	0.0160996	0.0620623
-2.20588	0	0.130567	0.164363	-0.0563187	0.079537	0.0686248		0.0138587	0.0130544	-0.0850024	-0.0193631	0.0328205
-2.05882	0	0.222283	0.132411	-0.0468533	0.102614	0.0791086		0.0830271	0.0323098	-0.0601999	0.018379	0.0419287
-1.91176	0	0.160185	0.152826	-0.0267506	0.0954201	0.0611223		0.0858013	0.047141	-0.0307504	0.034064	0.034275
-1.76471	0	0.148976	0.147212	-0.0199592	0.0920763	0.05602		0.257923	0.023956	-0.0311834	0.0835654	0.0886203
-1.61765	0	0.200462	0.144712	-0.0182956	0.10896	0.0656314		0.340876	0.0428527	-0.0740343	0.103231	0.12352
-1.47059	0	0.0505407	0.198088	-0.038046	0.0701942	0.0688707		0.302799	0.0948994	-0.0912021	0.102165	0.113796
-1.32353	0	0.0707795	0.276231	-0.036259	0.103584	0.0916871		0.27801	0.129595	-0.0948284	0.104259	0.108372
-1.17647	0	0.0546582	0.187836	-0.0328513	0.0698809	0.06416		0.206585	0.215442	-0.0720811	0.116649	0.0943995
-1.02941	0	0.109981	0.239157	-0.0253105	0.107943	0.076352		0.245622	0.223351	-0.0482616	0.140237	0.0944683
-0.882353	0	0.0942088	0.329235	-0.0251491	0.132765	0.104102		0.216709	0.261882	-0.0618625	0.138909	0.101229
-0.735294	0	0.118145	0.251305	-0.037033	0.110806	0.0833168		0.215023	0.239563	-0.0819129	0.124224	0.103312
-0.588235	0	0.140314	0.292031	-0.0514661	0.126959	0.0993836		0.0873816	0.239768	-0.0831632	0.0813288	0.0932713
-0.441176	0	0.115993	0.267317	-0.0501409	0.111056	0.0916755		-0.072125	0.240088	-0.0496375	0.0394419	0.100533
-0.294118	0	0.0973561	0.213189	-0.0280723	0.0941576	0.0696645		-0.115306	0.207979	-0.00338507	0.0297623	0.0947846
-0.147059	0	0.0936048	0.157939	-0.0249121	0.0755438	0.0535514		-0.0616891	0.182318	0.028331	0.0496532	0.0712409
0	1	0.107812	0.127494	-0.0159002	0.0731352	0.0448788		-0.0231344	0.0864557	0.0252494	0.0295236	0.031708
0.147059	1	0.0689455	0.0401979	-0.0210864	0.0293523	0.0265497		-0.0359215	0.0130602	-0.00346435	-0.00877521	0.014387
0.294118	1	-0.0032008	0.0429721	-0.0233694	0.00546728	0.0196354		-0.101499	-0.0574763	-0.0043656	-0.0544469	0.0280808
0.441177	1	-0.0170167	0.086595	-0.0139974	0.018527	0.0340452		-0.0949297	-0.0188217	0.00220939	-0.0371807	0.0295059
0.588235	1	0.0133993	-0.0177136	0.0059865	0.000557392	0.00938277		0.0144415	0.00100177	0.0101365	0.00852658	0.00396233
0.735294	1	0.0245444	0.0581225	0.0149503	0.0325391	0.0130881		0.134268	-0.0098378	0.00560861	0.0433464	0.0456791
0.882353	1	0.193763	0.116499	0.0196517	0.109971	0.0503674		0.309381	-0.00357841	-0.00365351	0.100716	0.104332
1.02941	1	0.337965	0.225145	0.0319084	0.198339	0.0893616		0.362813	0.0951629	-0.0306462	0.142443	0.116016
1.17647	1	0.428798	0.386372	0.0413974	0.285522	0.122675		0.404107	0.206547	0.0123347	0.207663	0.113096
1.32353	1	0.601189	0.479717	0.0676824	0.382863	0.161444		0.540681	0.330863	0.0492203	0.306922	0.142377
1.47059	1	0.764039	0.599975	0.0920068	0.48534	0.202289		0.768079	0.477868	0.0900076	0.445318	0.196418
1.61765	1	0.908143	0.740664	0.127184	0.591997	0.237382		0.933196	0.541509	0.131239	0.535315	0.231526
1.76471	1	1.01933	0.872632	0.130835	0.674266	0.274996		0.911709	0.643602	0.145467	0.566926	0.224493
1.91176	1	1.13944	0.910337	0.129342	0.726374	0.305755		0.877827	0.711974	0.164963	0.584921	0.215368
2.05882	1	1.14994	0.88521	0.123673	0.719606	0.30761		0.845112	0.716146	0.168586	0.576615	0.207383
2.20588	1	1.14324	0.812895	0.141354	0.699161	0.294756		0.816473	0.676693	0.227324	0.573497	0.177728
2.35294	1	1.27386	0.774005	0.127354	0.725074	0.331872		0.707039	0.725436	0.237527	0.556667	0.159659
2.5	1	1.22031	0.773452	0.129804	0.707855	0.316505		0.661238	0.658273	0.267644	0.529051	0.130706
2.64706	1	1.26672	0.58818	0.128674	0.661192	0.330548		0.684227	0.602812	0.2637	0.516913	0.12877
2.79412	1	1.18471	0.519228	0.106391	0.603443	0.314119		0.608437	0.537717	0.244611	0.463588	0.111376
2.94118	1	1.13877	0.553947	0.096735	0.596485	0.301561		0.555611	0.474859	0.233083	0.421184	0.0968966
3.08824	1	1.13364	0.505944	0.111853	0.583813	0.297523		0.63394	0.4475	0.246119	0.44252	0.111982
3.23529	0	1.15157	0.521693	0.137276	0.603513	0.295645		0.52308	0.469716	0.255352	0.416049	0.081812
3.38235	0	1.00111	0.493454	0.11697	0.537179	0.256164		0.572786	0.427467	0.234738	0.411664	0.0979056
3.52941	0	0.982136	0.492306	0.121067	0.531836	0.249354		0.567576	0.334137	0.173594	0.358436	0.11438
3.67647	0	1.10845	0.476556	0.0941055	0.559703	0.295751		0.491405	0.294477	0.12148	0.302454	0.106862
3.82353	0	0.967672	0.558852	0.0697452	0.53209	0.259554		0.25137	0.298205	0.116065	0.22188	0.0546077
3.97059	0	0.895289	0.554701	0.0638559	0.504615	0.241317		0.260173	0.319769	0.100971	0.226971	0.0653067
4.11765	0	0.923197	0.433488	0.0829262	0.479871	0.243672		0.326452	0.347316	0.145499	0.273089	0.0640785
4.26471	0	0.852778	0.51261	0.087669	0.484352	0.221319		0.334811	0.32918	0.105526	0.256506	0.0755072
4.41176	0	0.733638	0.447449	0.0652957	0.415461	0.193596		0.43254	0.431774	0.085525	0.316613	0.115544
4.55882	0	0.907129	0.497835	0.061834	0.488933	0.244056		0.356174	0.439834	0.0494262	0.281811	0.118676
4.70588	0	0.853527	0.415068	0.05179	0.440128	0.231781		0.439926	0.410342	0.0595008	0.303256	0.122177
4.85294	0	0.639582	0.449133	0.0773724	0.388696	0.165085		0.416516	0.483799	0.0822273	0.327514	0.124172
5	0	0.796764	0.386858	0.107448	0.430357	0.200174		0.481162	0.468846	0.0980969	0.349368	0.125686
5.14706	0	0.923001	0.349256	0.126508	0.466255	0.237253		0.488542	0.42699	0.115753	0.343761	0.115381
5.29412	0	0.882988	0.492971	0.126908	0.500956	0.218298		0.472646	0.447442	0.0970435	0.339044	0.121219
5.44118	0	0.932843	0.441819	0.11184	0.495501	0.238518		0.487586	0.432683	0.11972	0.346663	0.114573
5.58824	0	0.955428	0.592172	0.120974	0.556191	0.241557		0.379701	0.358373	0.113577	0.283884	0.0853758
5.73529	0	0.866171	0.608461	0.14264	0.53909	0.211726		0.431728	0.324895	0.166858	0.307827	0.0769359
5.88235	0	0.818836	0.680619	0.171208	0.556888	0.196924		0.443787	0.281036	0.19929	0.308038	0.0718598
6.02941	0	0.759653	0.668584	0.172272	0.533503	0.182519		0.490775	0.231995	0.236494	0.319755	0.0855198
6.17647	0	0.692427	0.764729	0.157196	0.538117	0.191601		0.465405	0.253214	0.237217	0.318612	0.0735418
6.32353	0	0.52291	0.76596	0.151852	0.480241	0.178557		0.467329	0.34452	0.249714	0.353854	0.0629932
6.47059	0	0.433497	0.641037	0.138719	0.404417	0.145734		0.461847	0.282213	0.268334	0.337464	0.0623201
6.61765	0	0.313172	0.639975	0.174661	0.375936	0.137942		0.318175	0.284229	0.290756	0.29772	0.0103997
6.76471	0	0.31213	0.477841	0.175811	0.321927	0.0873261		0.365489	0.258664	0.323654	0.315936	0.0310783
6.91176	0	0.357064	0.416287	0.164771	0.312708	0.0759183		0.447527	0.337939	0.316209	0.367225	0.0406378
7.05882	0	0.395857	0.38126	0.14962	0.308912	0.0797574		0.458646	0.362859	0.300252	0.373919	0.0460577
7.20588	0	0.482874	0.356803	0.137481	0.325719	0.10091		0.368793	0.356676	0.26339	0.32962	0.033299
7.35294	0	0.288058	0.289813	0.128634	0.235502	0.0534364		0.316598	0.300027	0.238782	0.285135	0.0236651
7.5	0	0.371257	0.297618	0.132346	0.267073	0.0706384		0.28221	0.262962	0.221399	0.255524	0.0179442
7.64706	0	0.411788	0.422937	0.142014	0.325579	0.0918394		0.259763	0.293952	0.223809	0.259175	0.0202508
7.79412	0	0.512777	0.344256	0.123177	0.326737	0.112808		0.214432	0.310883	0.208657	0.244657	0.0331547
7.94118	0	0.497494	0.441995	0.118829	0.352773	0.118064		0.177144	0.292959	0.173288	0.214463	0.0392634
8.08824	0	0.420216	0.364247	0.116951	0.300471	0.0931719		-0.002746	0.290915	0.136272	0.141481	0.0848127
8.23529	0	0.318507	0.333765	0.112332	0.254868	0.0714041		-0.0999068	0.249081	0.155801	0.101659	0.104318
8.38235	0	0.339894	0.367391	0.126459	0.277915	0.0761426		0.0619297	0.234907	0.168176	0.155004	0.0503667
8.52941	0	0.454321	0.428658	0.149451	0.344143	0.0976279		0.131494	0.297488	0.195281	0.208088	0.0483443
8.67647	0	0.454514	0.394027	0.136277	0.328273	0.0975729		0.209787	0.238369	0.188524	0.212227	0.0144406
8.82353	0	0.405332	0.206545	0.128429	0.246769	0.0824263		0.169245	0.189781	0.163087	0.174038	0.00807005
8.97059	0	0.264784	0.263598	0.123535	0.217306	0.0468866		0.295444	0.195377	0.154078	0.214967	0.0419677
9.11765	0	0.213475	0.179033	0.145668	0.179392	0.0195752		0.409799	0.129025	0.20885	0.249224	0.0835285
9.26471	0	0.257162	0.330965	0.162109	0.250079	0.0488731		0.369169	0.0916395	0.241508	0.234106	0.0802013
9.41176	0	0.27065	0.353501	0.182131	0.268761	0.0494794		0.545216	0.207566	0.232981	0.328588	0.108562
9.55882	0	0.160366	0.403619	0.17081	0.244932	0.0794009		0.408926	0.219807	0.189414	0.272716	0.068668
9.70588	0	0.120991	0.353249	0.161206	0.211815	0.0716633		0.428457	0.150156	0.152588	0.243734	0.0923644
9.85294	0	0.0861567	0.283167	0.174183	0.181169	0.056979		0.285729	0.161598	0.162489	0.203272	0.0412293
10	0	0.212096	0.390822	0.18741	0.263443	0.064087		0.238255	0.185228	0.167531	0.197005	0.0212486
10.1471	0	0.207945	0.407126	0.194195	0.269755	0.0687998		0.179962	0.109934	0.182557	0.157484	0.0237872
10.2941	0	0.23333	0.365244	0.190211	0.262928	0.0526504		0.0715521	0.151571	0.159355	0.127493	0.0280605
10.4412	0	0.176363	0.336424	0.175185	0.229324	0.053551		0.083853	0.163462	0.124117	0.12381	0.0229815
10.5882	0	0.207191	0.316633	0.168271	0.230698	0.0444121		0.00558943	0.158255	0.12077	0.0948716	0.0459339
10.7353	0	0.308868	0.193096	0.175085	0.225683	0.0419159		0.0512784	0.150119	0.171695	0.124364	0.0370699
10.8824	0	0.258801	0.115561	0.19293	0.189097	0.0413942		0.0195515	0.155429	0.188159	0.121046	0.0516196
11.0294	0	0.259371	0.169179	0.203222	0.210591	0.0262956		0.0303127	0.167924	0.195449	0.131229	0.0510797
11.1765	0	0.15157	0.108353	0.200751	0.153558	0.0266914		0.0378339	0.136898	0.206504	0.127079	0.0489377
11.3235	0	0.129279	0.0957083	0.189102	0.13803	0.0273133		-0.0051117	0.164766	0.19367	0.117775	0.0620073
11.4706	0	0.134869	0.160858	0.181253	0.158993	0.0134225		-0.00863759	0.2196	0.173432	0.128132	0.0696712
11.6176	0	0.0360439	0.134888	0.202363	0.124432	0.048296		0.127059	0.198862	0.21487	0.180264	0.027001
11.7647	0	-0.0399772	0.20373	0.200085	0.121279	0.0806352		0.0524964	0.0931231	0.203536	0.116385	0.0451261
11.9118	0	-0.130315	0.232698	0.216446	0.106276	0.118389		0.00224787	0.090712	0.177451	0.0901369	0.0505776
12.0588	0	-0.042946	0.256354	0.197789	0.137066	0.0915799		0.0966666	0.096702	0.157059	0.116809	0.0201249
12.2059	0	-0.0234854	0.269045	0.173883	0.139814	0.0861472		0.0636424	0.0859249	0.146678	0.0987483	0.0248129
12.3529	0	0.0469346	0.326151	0.168623	0.18057	0.0808239		0.104194	0.138817	0.127275	0.123429	0.0101781
12.5	0	0.0705524	0.313638	0.18118	0.188457	0.0702672		0.189507	0.133575	0.137774	0.153619	0.017985
12.6471	0	0.0442433	0.269631	0.181984	0.165286	0.0655972		0.175609	0.0138204	0.16932	0.119583	0.0529125
12.7941	0	0.0766402	0.293043	0.175969	0.181884	0.0625401		0.100748	0.0449978	0.165998	0.103915	0.0349656
12.9412	0	0.105427	0.3039	0.180164	0.196497	0.0578732		0.115136	0.140453	0.159476	0.138355	0.0128426
13.0882	0	0.264141	0.228976	0.155735	0.216284	0.0319308		0.136728	0.143454	0.156832	0.145671	0.0059085
13.2353	0	0.210852	0.261039	0.155287	0.209059	0.030541		0.0811236	0.207396	0.177331	0.155284	0.0380821
13.3824	0	0.189109	0.289532	0.165131	0.214591	0.0381047		0.22425	0.275865	0.18032	0.226812	0.0276112
13.5294	0	0.133789	0.32834	0.167858	0.209996	0.0599837		0.212293	0.282072	0.200188	0.231518	0.0255178
13.6765	0	0.202449	0.330409	0.161583	0.23148	0.0508517		0.227378	0.297942	0.178423	0.234581	0.0346898
13.8235	0	0.190542	0.38765	0.145284	0.241159	0.0744019		0.21759	0.381281	0.145304	0.248058	0.0698033
13.9706	0	0.162163	0.276175	0.125448	0.187929	0.0453782		0.280298	0.395307	0.123575	0.266393	0.0787498
14.1176	0	0.160043	0.232691	0.115872	0.169535	0.0340554		0.428102	0.372883	0.141327	0.314104	0.087847
14.2647	0	0.0698636	0.289021	0.123773	0.160886	0.0659307		0.418105	0.372628	0.16139	0.317374	0.0790896
14.4118	0	0.113728	0.218695	0.130354	0.154259	0.0325736		0.334693	0.302248	0.181947	0.272963	0.0464618
14.5588	0	0.145869	0.181283	0.135621	0.154258	0.0138327		0.297248	0.244414	0.166132	0.235932	0.038087
14.7059	0	0.12665	0.0901546	0.124971	0.113925	0.0118952		0.336453	0.192022	0.126008	0.218161	0.0621402
14.8529	0	0.125172	0.137625	0.10939	0.124062	0.00816934		0.288262	0.2754	0.127914	0.230525	0.0514399
15	0	0.171983	0.128933	0.114973	0.13863	0.0171566		0.420449	0.250938	0.155809	0.275732	0.0773941
15.1471	0	0.244285	0.173778	0.127859	0.181974	0.0338582		0.435696	0.249499	0.165169	0.283455	0.0799187
15.2941	0	0.224867	0.143996	0.140606	0.169823	0.0275394		0.196832	0.215935	0.138202	0.183656	0.0233868
15.4412	0	0.191687	0.194714	0.141494	0.175965	0.0172575		0.202045	0.244956	0.0975189	0.181507	0.0437827
15.5882	0	0.233983	0.298678	0.130765	0.221142	0.0488956		0.18284	0.293454	0.0471048	0.174467	0.0712381
15.7353	0	0.204582	0.253942	0.106473	0.188332	0.0433389		0.191993	0.297205	0.0423886	0.177196	0.0739304
15.8824	0	0.200137	0.247058	0.119143	0.188779	0.0373598		0.204869	0.275108	0.080168	0.186715	0.0570017
16.0294	0	0.182838	0.138575	0.15246	0.157958	0.0130702		0.147973	0.20711	0.103378	0.15282	0.0300429
16.1765	0	0.193327	0.1222	0.172259	0.162596	0.0210936		0.163555	0.220577	0.08665	0.156928	0.0388033
16.3235	0	0.183381	0.154211	0.162498	0.166697	0.00867829		0.242431	0.140957	0.064361	0.14925	0.0515713
16.4706	0	0.173163	0.204414	0.151036	0.176205	0.0154839		0.371152	0.273169	0.0627814	0.235701	0.0909688
16.6176	0	0.208289	0.145826	0.142851	0.165655	0.021334		0.383723	0.235157	0.0880907	0.235657	0.085342
16.7647	0	0.116696	0.114783	0.150769	0.127416	0.0116895		0.507594	0.191393	0.101777	0.266921	0.123086
16.9118	0	0.153272	0.0974693	0.17173	0.140824	0.0223224		0.509346	0.256951	0.112047	0.292781	0.116081
17.0588	0	0.153585	0.136048	0.173332	0.154322	0.0107693		0.52378	0.23678	0.0857684	0.282109	0.128458
17.2059	0	0.164226	0.171303	0.148776	0.161435	0.00665092		0.555583	0.284791	0.048731	0.296368	0.14643
17.3529	0	0.120839	0.27873	0.127181	0.175583	0.0516056		0.459258	0.322704	0.0238399	0.2686	0.128572
17.5	0	0.102101	0.331322	0.126851	0.186758	0.0726342		0.371829	0.345466	0.0339363	0.25041	0.108504
17.6471	0	0.175697	0.261535	0.132133	0.189788	0.0380137		0.33895	0.278496	0.0546705	0.224039	0.0864637
17.7941	0	0.163268	0.355465	0.140735	0.219823	0.0681324		0.423401	0.305989	0.0382272	0.255872	0.113979
17.9412	0	0.125654	0.316303	0.133939	0.191965	0.0622148		0.401494	0.253977	0.0327236	0.229398	0.107162
18.0882	0	0.125758	0.430797	0.117091	0.224548	0.103155		0.313063	0.165576	0.0196532	0.166097	0.0847004
18.2353	0	0.148382	0.40964	0.106804	0.221609	0.0947786		0.410059	0.358666	0.00200441	0.25691	0.128313
18.3824	0	0.0872519	0.418735	0.117762	0.207916	0.105777		0.333993	0.380161	0.0426145	0.252256	0.105665
18.5294	0	0.103171	0.407913	0.113332	0.208139	0.0999304		0.456824	0.373591	0.0683907	0.299602	0.118076
18.6765	0	0.144227	0.358344	0.127623	0.210064	0.0742945		0.514823	0.398276	0.0785502	0.330549	0.130414
18.8235	0	0.122109	0.402054	0.131413	0.218525	0.0918037		0.503179	0.340538	0.0708933	0.30487	0.126058
18.9706	0	0.0908119	0.260584	0.113089	0.154828	0.0532674		0.368275	0.398599	0.0726485	0.279841	0.103965
19.1176	0	0.139385	0.301078	0.111843	0.184102	0.0590261		0.189158	0.43303	0.0914046	0.237864	0.101581
19.2647	0	0.0741816	0.266884	0.11845	0.153172	0.0582744		0.376601	0.439478	0.119215	0.311765	0.0979707
19.4118	0	0.140522	0.267194	0.127933	0.17855	0.044471		0.293221	0.286525	0.160907	0.246884	0.0430322
19.5588	0	0.207058	0.323635	0.127534	0.219409	0.0569452		0.421719	0.191627	0.155747	0.256364	0.0833236
19.7059	0	0.22198	0.194917	0.144926	0.187274	0.0225696		0.344161	0.127095	0.154946	0.208734	0.068189
19.8529	0	0.230522	0.187449	0.126702	0.181558	0.0301146		0.235145	0.18228	0.149017	0.188814	0.0250768
20	0	0.223543	0.1215	0.117677	0.15424	0.0346688		0.279241	0.162861	0.150807	0.197636	0.0409507
20.1471	0	0.201393	0.237859	0.127909	0.189054	0.0323338		0.29756	0.154861	0.173964	0.208795	0.044724
20.2941	0	0.243742	0.224744	0.132441	0.200309	0.0343743		0.478619	0.176469	0.185119	0.280069	0.0993064
20.4412	0	0.368382	0.173153	0.148754	0.230096	0.0695006		0.275932	0.207092	0.163882	0.215635	0.0326268
20.5882	0	0.252787	0.237788	0.132851	0.207808	0.0377282		0.290871	0.181889	0.150571	0.207777	0.0425192
20.7353	0	0.26549	0.201135	0.106618	0.191081	0.046137		0.307848	0.217675	0.121081	0.215535	0.0539255
20.8824	0	0.247684	0.271206	0.0803195	0.199736	0.0600932		0.252367	0.288858	0.14259	0.227938	0.0439549
21.0294	0	0.30309	0.273601	0.091296	0.222662	0.0662324		0.265933	0.252219	0.147085	0.221746	0.0375397
21.1765	0	0.312663	0.272772	0.0914398	0.225625	0.0680736		0.331073	0.303779	0.160458	0.265103	0.0529124
21.3235	0	0.343404	0.28545	0.0903943	0.239749	0.0765285		0.420088	0.200075	0.13991	0.253358	0.0851551
21.4706	0	0.319014	0.29817	0.0735185	0.230234	0.0785885		0.395947	0.219563	0.0940807	0.23653	0.0875533
21.6176	0	0.17121	0.250597	0.0537887	0.158532	0.0571661		0.389468	0.167235	0.075791	0.210831	0.0931375
21.7647	0	0.21184	0.18374	0.0648416	0.153474	0.0450525		0.356539	0.249342	0.09568	0.233854	0.0757006
21.9118	0	0.184284	0.183523	0.0846383	0.150815	0.0330891		0.304892	0.222854	0.134076	0.220607	0.0493232
22.0588	0	0.217648	0.109836	0.117317	0.148267	0.0347577		0.386505	0.247705	0.102276	0.245495	0.0820573
22.2059	0	0.125845	0.0933273	0.119944	0.113039	0.0100019		0.441236	0.160541	0.0964714	0.232749	0.105871
22.3529	0	0.158603	0.12838	0.117319	0.134767	0.0123382		0.456743	0.152288	0.0766642	0.228565	0.116159
22.5	0	0.142544	0.00242393	0.11778	0.0875827	0.0431753		0.511855	0.18476	0.0866744	0.261097	0.128537
22.6471	0	0.0917736	-0.0286494	0.128146	0.0637568	0.0473812		0.554895	0.178353	0.120211	0.284486	0.136242
22.7941	0	0.143312	0.0735114	0.146095	0.120973	0.0237443		0.617944	0.201636	0.1748	0.33146	0.143451
22.9412	0	0.178917	0.111538	0.156789	0.149082	0.0198288		0.580018	0.128251	0.176822	0.295031	0.143182
23.0882	0	0.149579	0.16428	0.166138	0.159999	0.00523758		0.605626	0.176163	0.159111	0.313633	0.146079
23.2353	0	0.0772351	0.208069	0.152962	0.146089	0.0379247		0.651208	0.0556282	0.146234	0.284357	0.185281
23.3824	0	0.0937529	0.24804	0.134865	0.158886	0.0461297		0.638636	0.126725	0.142241	0.302534	0.168111
23.5294	0	0.0110192	0.257733	0.145194	0.137982	0.0713113		0.536743	0.104859	0.152371	0.264658	0.136732
23.6765	0	0.0784431	0.34732	0.150639	0.192134	0.0803432		0.317894	0.10195	0.16063	0.193492	0.0644667
23.8235	0	0.0816566	0.330978	0.152093	0.188243	0.0742079		0.328692	0.0945185	0.159009	0.194073	0.0698367
23.9706	0	0.0809443	0.302651	0.141227	0.174941	0.066184		0.347825	0.0519308	0.122703	0.174153	0.0892069
24.1176	0	0.05778	0.275343	0.117829	0.150317	0.0648717		0.40689	0.0693193	0.0725425	0.182917	0.11199
24.2647	0	0.122846	0.258688	0.0912556	0.157596	0.0513616		0.44117	0.0374911	0.0768955	0.185186	0.128497
24.4118	0	0.266395	0.23073	0.0933334	0.19682	0.0527574		0.455608	0.0844607	0.0789834	0.206351	0.124639
24.5588	0	0.275222	0.192224	0.118464	0.195303	0.0452785		0.362368	0.0752117	0.125802	0.187794	0.0885003
24.7059	0	0.312037	0.228599	0.123674	0.221437	0.0544936		0.389705	0.0891089	0.125508	0.201441	0.0947166
24.8529	0	0.251346	0.192559	0.114722	0.186209	0.0395675		0.517551	0.109086	0.121422	0.249353	0.134146
25	0	0.323116	0.22466	0.0947033	0.21416	0.0661458		0.445904	0.0811478	0.0919483	0.206333	0.119826
25.1471	0	0.306411	0.224654	0.0804315	0.203832	0.0660601		0.393432	0.146612	0.0931068	0.21105	0.0924897
25.2941	0	0.313881	0.244917	0.0853492	0.214716	0.0676776		0.363559	0.153519	0.111138	0.209405	0.0780416
25.4412	0	0.376207	0.182373	0.0925722	0.217051	0.0836942		0.289281	0.170361	0.111285	0.190309	0.052342
25.5882	0	0.312516	0.195278	0.0851704	0.197655	0.0656397		0.144715	0.199645	0.128678	0.157679	0.0214875
25.7353	0	0.288571	0.19467	0.0610236	0.181422	0.0660206		0.284919	0.250517	0.069861	0.201766	0.0666959
25.8824	0	0.276712	0.127172	0.0382827	0.147389	0.069567		0.270219	0.261695	0.0658017	0.199238	0.0667637
26.0294	0	0.307809	0.197391	0.0276481	0.177616	0.0814777		0.260232	0.253697	0.0471344	0.187021	0.0699688
26.1765	0	0.357756	0.183212	0.0559161	0.198961	0.0874887		0.210896	0.276281	0.0822113	0.189796	0.0570077
26.3235	0	0.353544	0.18619	0.0631487	0.200961	0.0841547		0.263049	0.251708	0.100112	0.204957	0.0525244
26.4706	0	0.316411	0.183597	0.0587812	0.186263	0.0743832		0.369111	0.281311	0.0947357	0.248386	0.0808982
26.6176	0	0.380695	0.182298	0.0623137	0.208436	0.0928332		0.398887	0.274561	0.100774	0.258074	0.0864516
26.7647	0	0.319409	0.251673	0.058242	0.209775	0.0782488		0.414422	0.278045	0.0809098	0.257792	0.0968078
26.9118	0	0.331825	0.251469	0.064483	0.215926	0.0791947		0.25794	0.25036	0.0994887	0.202596	0.0516003
27.0588	0	0.372818	0.296107	0.0833352	0.250754	0.0865888		0.301925	0.278993	0.11109	0.230669	0.060155
27.2059	0	0.418774	0.26387	0.0994707	0.260705	0.0921886		0.309987	0.255146	0.124702	0.229945	0.0549512
27.3529	0	0.366444	0.251624	0.089476	0.235848	0.0803419		0.485283	0.262651	0.11979	0.289241	0.106343
27.5	0	0.395319	0.271058	0.0731335	0.246504	0.0938138		0.384674	0.228567	0.102847	0.238696	0.0815139
27.6471	0	0.493229	0.320395	0.0723253	0.295316	0.12215		0.26774	0.201316	0.10289	0.190649	0.047886
27.7941	0	0.412939	0.306225	0.0693774	0.262847	0.101522		0.270274	0.162159	0.104281	0.178905	0.0486439
27.9412	0	0.499032	0.306227	0.0836612	0.296307	0.12001		0.398127	0.0872646	0.120483	0.201958	0.0985521
28.0882	0	0.512858	0.26594	0.0956923	0.291497	0.121102		0.459691	0.0897053	0.116801	0.222066	0.11907
28.2353	0	0.532187	0.265008	0.0586244	0.285273	0.137081		0.451774	0.131721	0.0941966	0.225897	0.113457
28.3824	0	0.482797	0.192141	0.0366128	0.237184	0.130756		0.451136	0.145568	0.0833555	0.226686	0.113653
28.5294	0	0.475948	0.311737	0.0398454	0.275843	0.127165		0.361071	0.142082	0.070262	0.191138	0.0874591
28.6765	0	0.484297	0.396927	0.056256	0.312493	0.130578		0.445745	0.180414	0.0756111	0.233923	0.110147
28.8235	0	0.465776	0.401931	0.0707573	0.312821	0.122427		0.417872	0.201798	0.0837974	0.234489	0.0978145
28.9706	0	0.440222	0.434887	0.0727956	0.315968	0.121596		0.494245	0.224102	0.0632547	0.260534	0.125743
29.1176	0	0.424295	0.383977	0.0596766	0.289316	0.115408		0.352522	0.329192	0.0297217	0.237145	0.10393
29.2647	0	0.475559	0.427266	0.0215939	0.30814	0.14395		0.396681	0.254561	0.0183861	0.223209	0.110324
29.4118	0	0.420617	0.403963	0.0344202	0.286333	0.126048		0.329441	0.102966	0.0227296	0.151712	0.0918333
29.5588	0	0.466681	0.415548	0.0566101	0.312946	0.129015		0.364794	0.0244956	0.0224423	0.137244	0.113777
29.7059	0	0.421982	0.360276	0.0519786	0.278079	0.114445		0.381655	0.00934142	0.0358377	0.142278	0.119933
29.8529	0	0.462766	0.296876	0.0462844	0.268642	0.121054		0.353544	-0.00592815	0.0356113	0.127743	0.113536
30	0	0.454096	0.240383	0.0251548	0.239878	0.123825		0.471752	-0.0159069	0.029111	0.161652	0.155594
30.1471	0	0.373197	0.262694	0.0121089	0.216	0.10682		0.418017	-0.0205402	-0.008071	0.129802	0.144152
30.2941	0	0.289591	0.188741	0.0116416	0.163324	0.0812371		0.523064	-0.114139	0.0439948	0.150973	0.191564
30.4412	0	0.331823	0.179972	0.0351538	0.182316	0.0856489		0.473955	-0.0780656	0.0438575	0.146582	0.167427
30.5882	0	0.397742	0.146302	0.0394326	0.194492	0.106204		0.589733	0.00875384	0.05275	0.217079	0.186759
30.7353	0	0.364001	0.233087	0.0196325	0.205574	0.100358		0.538198	0.101818	0.0348605	0.224959	0.157808
30.8824	0	0.406179	0.197358	0.0113432	0.20496	0.114043		0.60281	0.0771155	0.0291023	0.236342	0.183757
31.0294	0	0.435842	0.164245	-0.0040367	0.198683	0.128144		0.620284	0.145262	-0.00409258	0.253818	0.188237
31.1765	0	0.388946	0.15757	0.0144255	0.186981	0.10911		0.572928	0.198417	-0.00561969	0.255242	0.169412
31.3235	0	0.416357	0.065679	0.0289568	0.170331	0.123469		0.507809	0.173518	0.0428669	0.241398	0.138442
31.4706	0	0.471293	0.11019	0.0246338	0.202039	0.136874		0.479289	0.212419	0.039419	0.243709	0.12794
31.6176	0	0.387902	0.128114	0.0291515	0.181723	0.106975		0.506127	0.172398	0.0336908	0.237405	0.1402
31.7647	0	0.408211	0.203095	0.0196669	0.210324	0.112221		0.452981	0.144178	0.0130319	0.203397	0.130408
31.9118	0	0.359157	0.110469	0.0162077	0.161945	0.102292		0.535268	0.121325	0.0261696	0.227588	0.156273
32.0588	0	0.334283	0.0772112	0.0169907	0.142828	0.097293		0.583139	0.115384	0.0138952	0.237473	0.175299
32.2059	0	0.366726	0.0419129	0.0491929	0.15261	0.107078		0.598092	0.0721266	0.0649989	0.245072	0.176522
32.3529	0	0.391469	0.0641332	0.0385688	0.164724	0.113613		0.593825	0.0845156	0.0816101	0.253317	0.170256
32.5	0	0.455052	0.171649	0.0251347	0.217279	0.126186		0.568974	0.116047	0.0525514	0.245858	0.162595
32.6471	0	0.466172	0.194577	0.0185303	0.226427	0.130201		0.441531	0.106604	0.00509931	0.184411	0.131857
32.7941	0	0.440221	0.162989	-0.00230234	0.200302	0.129101		0.394471	0.155678	0.00958014	0.186576	0.112177
32.9412	0	0.343534	0.169634	0.0127703	0.175313	0.0955255		0.350379	0.127834	0.0328148	0.170343	0.0941047
33.0882	0	0.498928	0.221414	0.0269589	0.2491	0.136947		0.24154	0.138923	0.0525222	0.144328	0.0546316
33.2353	0	0.546108	0.220105	0.0379149	0.268043	0.148648		0.169438	0.176452	0.0495502	0.131814	0.0411815
33.3824	0	0.51743	0.25035	0.0241302	0.26397	0.142566		0.0814671	0.175304	0.0174895	0.0914202	0.0458281
33.5294	0	0.533331	0.217927	0.012975	0.254744	0.151338		0.122808	0.104033	-0.0265806	0.0667535	0.0469807
33.6765	0	0.45789	0.180354	0.00966816	0.215971	0.13061		0.0967185	0.158103	-0.000484021	0.0847792	0.0461677
33.8235	0	0.376527	0.209	0.0215512	0.202359	0.102526		0.276189	0.189095	0.0376631	0.167649	0.0696865
33.9706	0	0.373265	0.264607	0.0384105	0.225428	0.0986293		0.188724	0.18751	0.0549031	0.143713	0.0444061
34.1176	0	0.45243	0.242557	0.0364183	0.243802	0.120094		0.213948	0.21225	0.0429228	0.156373	0.0567274
34.2647	0	0.285406	0.180935	0.0297955	0.165379	0.0741972		0.201332	0.324253	0.00967712	0.178421	0.0915301
34.4118	0	0.368071	0.190856	0.0128605	0.190596	0.102541		0.145675	0.314868	-0.00905391	0.150496	0.0935394
34.5588	0	0.36996	0.151795	0.0017945	0.174517	0.106886		0.145057	0.308114	-0.00534792	0.149274	0.0905131
34.7059	0	0.408517	0.260232	0.0229129	0.230554	0.112299		0.208951	0.305332	0.0182201	0.177501	0.0843606
34.8529	0	0.414986	0.242659	0.0431	0.233582	0.10745		0.180141	0.227152	-0.0120626	0.131743	0.0731724
35	0	0.466833	0.218206	0.043504	0.242848	0.122824		0.00971572	0.183255	-0.0310838	0.0539623	0.0657104
35.1471	0	0.489791	0.208061	0.0372933	0.245048	0.131927		0.0972325	0.205618	-0.0548485	0.0826674	0.0755421
35.2941	0	0.474153	0.252856	0.0296351	0.252215	0.128322		0.0324012	0.216512	-0.0784277	0.0568286	0.0860134
35.4412	0	0.545378	0.266273	0.0307522	0.280801	0.148737		0.0225069	0.146399	-0.0671163	0.03393	0.0619007
35.5882	0	0.463162	0.260868	0.0419064	0.255312	0.121638		0.0197172	0.207841	-0.0310062	0.0655173	0.0726526
35.7353	0	0.320594	0.252199	0.0359115	0.202902	0.0857977		0.0375978	0.264499	-0.0230492	0.0930157	0.0875106
35.8824	0	0.309821	0.115504	0.0230556	0.14946	0.0845051		0.00504239	0.332631	-0.0156367	0.107346	0.112801
36.0294	0	0.313719	0.117336	0.0112786	0.147444	0.0885955		0.187297	0.371354	-0.0110476	0.182535	0.110416
36.1765	0	0.421523	0.150485	-0.000332967	0.190558	0.123417		0.198117	0.332747	-0.0027156	0.176049	0.0974662
36.3235	0	0.436149	0.172348	-0.00907971	0.199806	0.129258		0.266992	0.302957	-0.000403332	0.189849	0.0956909
36.4706	0	0.458053	0.100694	0.0090119	0.189253	0.136981		0.385216	0.297027	0.0131768	0.231806	0.11224
36.6176	0	0.40266	0.184915	0.0146962	0.200757	0.112275		0.49352	0.321709	0.032117	0.282449	0.134634
36.7647	0	0.490955	0.24555	0.00836432	0.24829	0.139319		0.45595	0.307509	0.00691503	0.256791	0.132082
36.9118	0	0.569458	0.307327	0.0112025	0.295996	0.161254		0.50972	0.221073	-0.0259321	0.234954	0.154785
37.0588	0	0.521996	0.270955	0.0173115	0.270087	0.14569		0.335897	0.148315	-0.0295617	0.15155	0.105511
37.2059	0	0.563448	0.25715	0.0227517	0.281117	0.156545		0.305842	0.107031	-0.0183326	0.131514	0.0943785
37.3529	0	0.530023	0.26635	0.0357993	0.277391	0.142777		0.367337	0.197212	-0.0225778	0.180657	0.112863
37.5	0	0.457615	0.26061	0.0506167	0.256281	0.11751		0.281477	0.181268	-0.0286037	0.144714	0.0913594
37.6471	0	0.414465	0.252949	0.0293898	0.232268	0.111642		0.208905	0.198085	-0.0332577	0.124578	0.0789795
37.7941	0	0.382621	0.140377	0.0161256	0.179708	0.10761		0.204214	0.121688	-0.0397345	0.095389	0.071639
37.9412	0	0.210038	0.066444	0.0143032	0.0969284	0.0585235		0.340149	0.0779008	-0.0388019	0.126416	0.112051
38.0882	0	0.252992	0.0734073	0.029027	0.118476	0.0684677		0.376615	0.08125	-0.0311283	0.142246	0.121592
38.2353	0	0.180209	0.191626	0.0187708	0.130202	0.055813		0.408964	0.132019	-0.0250205	0.171988	0.126864
38.3824	0	0.170957	0.290497	0.0156223	0.159025	0.0795734		0.288356	0.10947	-0.0409605	0.118955	0.0951837
38.5294	0	0.0613506	0.281799	0.00775673	0.116969	0.0838547		0.223282	0.115825	-0.0668487	0.0907529	0.0846866
38.6765	0	0.115638	0.203429	0.00261848	0.107229	0.0581214		0.299636	0.150656	-0.0741553	0.125379	0.108642
38.8235	0	0.111722	0.238791	-0.00112525	0.116462	0.0692985		0.248284	0.117005	-0.0581853	0.102368	0.0887723
38.9706	0	0.185421	0.285069	0.009489	0.159993	0.0805626		0.171149	0.142784	-0.049621	0.0881037	0.0693474
39.1176	0	0.292901	0.360456	0.0187987	0.224052	0.104463		0.070762	0.0871456	-0.0308108	0.0423656	0.0368926
39.2647	0	0.293429	0.338384	0.0097003	0.213838	0.10289		0.069217	0.116633	-0.0139612	0.0572963	0.0381676
39.4118	0	0.439495	0.363445	0.0190935	0.274011	0.129336		0.161928	0.0491734	-0.038282	0.0576064	0.0579492
39.5588	0	0.359452	0.291384	0.0129169	0.221251	0.106004		0.325574	0.0879824	-0.0468531	0.122234	0.108866
39.7059	0	0.392118	0.20345	0.0147051	0.203424	0.10895		0.435843	0.0293835	-0.0228914	0.147445	0.144986
39.8529	0	0.318049	0.248979	0.0243183	0.197116	0.0886695		0.413388	-0.031602	0.00903394	0.130273	0.142042
40	0	0.322388	0.222264	0.036562	0.193738	0.0837345		0.567838	-0.0584484	0.0166654	0.175352	0.197437
40.1471	0	0.369784	0.294206	0.0392159	0.234402	0.100002		0.624559	-0.0997583	-0.018167	0.168878	0.229055
40.2941	0	0.401811	0.297408	0.0224655	0.240561	0.113136		0.646951	-0.00935204	-0.0304051	0.202398	0.222359
40.4412	0	0.390391	0.295245	0.0199884	0.235208	0.11106		0.701946	-0.0148962	-0.0200024	0.222349	0.239803
40.5882	0	0.438697	0.219047	0.0298594	0.229201	0.11813		0.745845	0.0274452	0.0101774	0.261156	0.242396
40.7353	0	0.540972	0.170789	0.0399348	0.250565	0.150036		0.724136	0.0278414	0.0602763	0.270751	0.226885
40.8824	0	0.564717	0.261382	0.0570473	0.294382	0.147477		0.782656	0.0456506	0.0677102	0.298672	0.242076
41.0294	0	0.621195	0.247775	0.0538582	0.307609	0.166486		0.688969	0.0791594	0.0738484	0.280659	0.204161
41.1765	0	0.580061	0.218498	0.0438988	0.280819	0.157882		0.688507	0.107894	0.0612801	0.285894	0.201756
41.3235	0	0.471856	0.103139	0.0356226	0.203539	0.135567		0.665163	0.123085	0.0818979	0.290049	0.187934
41.4706	0	0.390141	0.0541076	0.0553826	0.166544	0.111799		0.662367	0.0728834	0.0973876	0.277546	0.19254
41.6176	0	0.300281	0.0299837	0.0694509	0.133238	0.0842946		0.596768	0.0685611	0.102708	0.256012	0.170663
41.7647	0	0.111139	0.093835	0.0575545	0.0875096	0.0157886		0.500126	0.00675842	0.0850881	0.197324	0.15308
41.9118	0	0.0566182	0.136254	0.0504216	0.0810978	0.0276358		0.470526	0.00490849	0.0473519	0.174262	0.148638
42.0588	0	0.0548844	0.0844938	0.0383434	0.0592405	0.0134994		0.307218	0.0779606	0.0164312	0.13387	0.0884754
42.2059	0	0.0320621	0.0679421	0.0382868	0.046097	0.0110694		0.387348	0.0949362	0.0108711	0.164385	0.114092
42.3529	0	0.108392	0.131466	0.0571249	0.0989943	0.0219688		0.324524	0.0918987	0.0425838	0.153002	0.0869343
42.5	0	0.211506	0.239357	0.0645761	0.171813	0.0542179		0.361529	0.110715	0.0445472	0.172264	0.0965411
42.6471	0	0.261996	0.232902	0.061546	0.185481	0.0625342		0.243753	0.153528	0.0298312	0.142371	0.0620054
42.7941	0	0.247656	0.261273	0.0585271	0.189152	0.0654307		0.394543	0.158708	0.00872479	0.187325	0.112291
42.9412	0	0.395998	0.203311	0.0496691	0.216326	0.100188		0.489361	0.208821	0.0135642	0.237249	0.138084
43.0882	0	0.357606	0.149398	0.0648102	0.190605	0.0869977		0.424284	0.248362	0.0216596	0.231435	0.116535
43.2353	0	0.359388	0.17478	0.0580124	0.197394	0.0877313		0.544342	0.158331	0.0702918	0.257655	0.145579
43.3824	0	0.488701	0.213944	0.0605047	0.254383	0.125253		0.597421	0.141321	0.0608295	0.266524	0.167072
43.5294	0	0.446813	0.198121	0.052306	0.232413	0.115168		0.658626	0.199978	0.0180646	0.292223	0.190579
43.6765	0	0.351726	0.114767	0.0571633	0.174552	0.0901342		0.630411	0.217233	0.00377308	0.283806	0.183932
43.8235	0	0.306591	0.116808	0.051378	0.158259	0.0765335		0.68842	0.190873	0.0203161	0.29987	0.200417
43.9706	0	0.329433	0.112041	0.0457313	0.162402	0.0856811		0.533534	0.233528	0.0448864	0.27065	0.142276
44.1176	0	0.227784	0.0942613	0.058597	0.126881	0.0514913		0.609902	0.269412	0.0426738	0.307329	0.164839
44.2647	0	0.240186	0.165304	0.0574598	0.154317	0.0530338		0.695265	0.259589	0.0595109	0.338122	0.18768
44.4118	0	0.227525	0.120459	0.0648112	0.137599	0.0477468		0.725315	0.246328	0.0463979	0.339347	0.201429
44.5588	0	0.108017	0.168717	0.0591893	0.111975	0.0316799		0.654124	0.220821	0.0463768	0.307107	0.180668
44.7059	0	0.108742	0.151032	0.0609904	0.106921	0.0260086		0.555365	0.189192	0.0535974	0.266051	0.149859
44.8529	0	0.177485	0.188789	0.0619637	0.142746	0.0405227		0.516221	0.195924	0.0553369	0.255827	0.136375
45	0	0.250405	0.251125	0.0848243	0.195452	0.055314		0.57918	0.196195	0.0547933	0.276723	0.156641
45.1471	0	0.238304	0.293636	0.105856	0.212599	0.0557103		0.598844	0.179021	0.0387237	0.272196	0.16827
45.2941	0	0.230505	0.399663	0.106813	0.24566	0.0848776		0.402987	0.0720686	0.0467632	0.17394	0.114756
45.4412	0	0.298964	0.419661	0.100497	0.273041	0.0930419		0.410502	0.00518435	0.0452792	0.153655	0.128944
45.5882	0	0.300589	0.432191	0.0997248	0.277502	0.0966666		0.405088	0.0114315	0.0638639	0.160128	0.123412
45.7353	0	0.366286	0.446075	0.109052	0.307138	0.101686		0.369963	0.0437252	0.0936594	0.169116	0.101453
45.8824	0	0.341112	0.476294	0.122897	0.313434	0.102951		0.372212	-0.00279532	0.124683	0.1647	0.110089
46.0294	0	0.462918	0.542094	0.127688	0.377567	0.127013		0.331177	0.00400942	0.147268	0.160818	0.0946879
46.1765	0	0.381472	0.537732	0.112933	0.344046	0.124049		0.34603	-0.00695747	0.146519	0.161864	0.102187
46.3235	0	0.417731	0.495686	0.0990447	0.337487	0.121327		0.281794	-0.0333972	0.138243	0.12888	0.0911082
46.4706	0	0.403932	0.381033	0.0916306	0.292199	0.100502		0.245846	0.0778108	0.132064	0.151907	0.0495118
46.6176	0	0.328232	0.300917	0.0990506	0.242733	0.0722729		0.301213	0.0963893	0.137812	0.178472	0.062525
46.7647	0	0.365284	0.318102	0.101636	0.261674	0.0811698		0.262864	0.0993099	0.130926	0.164367	0.0500872
46.9118	0	0.321661	0.327962	0.10171	0.250444	0.0743895		0.277441	0.112302	0.09647	0.162071	0.0578658
47.0588	0	0.380122	0.259343	0.0767841	0.23875	0.0881694		0.259326	0.129538	0.0820612	0.156975	0.0529789
47.2059	0	0.193901	0.19191	0.053613	0.146475	0.0464345		0.20761	0.156649	0.058269	0.140843	0.0438295
47.3529	0	0.192252	0.0861429	0.0592751	0.112557	0.0405954		0.073295	0.142316	0.0576262	0.0910792	0.0260148
47.5	0	0.228792	0.0508083	0.0667906	0.115464	0.0568516		0.0248187	0.230624	0.105403	0.120282	0.0598747
47.6471	0	0.340854	0.126734	0.0761212	0.181236	0.0811352		0.0287496	0.157854	0.11878	0.101795	0.0382247
47.7941	0	0.374679	0.120051	0.0742169	0.189649	0.0934565		-0.114313	0.227962	0.0879886	0.0672125	0.0993506
47.9412	0	0.377216	0.105285	0.0752412	0.185914	0.0960433		-0.101594	0.250505	0.0815324	0.0768143	0.10167
48.0882	0	0.547978	0.0409095	0.0781797	0.222356	0.163166		0.0185397	0.275325	0.122493	0.138786	0.0745738
48.2353	0	0.617352	0.0836605	0.103438	0.26815	0.174694		0.0268641	0.297235	0.141121	0.155073	0.0783606
48.3824	0	0.583368	0.0628998	0.127212	0.257827	0.163826		0.15375	0.263577	0.178532	0.19862	0.033257
48.5294	0	0.584654	0.0928988	0.142702	0.273418	0.15628		0.291064	0.346477	0.204668	0.280736	0.0412612
48.6765	0	0.557867	0.135348	0.152532	0.281916	0.138065		0.370558	0.245849	0.194304	0.270237	0.052321
48.8235	0	0.436104	0.0947827	0.170042	0.233643	0.103536		0.48108	0.244508	0.220856	0.315481	0.0830804
48.9706	0	0.409777	0.20496	0.166351	0.260363	0.0755341		0.48489	0.158617	0.245887	0.296465	0.0975227
49.1176	0	0.354234	0.281088	0.164361	0.266561	0.0552908		0.493348	0.186629	0.262563	0.31418	0.0922268
49.2647	0	0.186409	0.297427	0.170206	0.218014	0.039981		0.478792	0.15846	0.23929	0.292181	0.096179
49.4118	0	0.0568753	0.408381	0.165184	0.210147	0.103932		0.566779	0.187365	0.231365	0.328503	0.119813
49.5588	0	0.133299	0.382985	0.163619	0.226634	0.0786639		0.55499	0.172451	0.218702	0.315381	0.120546
49.7059	0	0.142661	0.452673	0.154403	0.249912	0.101437		0.393312	0.118665	0.190703	0.234227	0.0822163
49.8529	0	0.220034	0.496654	0.144604	0.287097	0.107017		0.497979	0.121818	0.159917	0.259905	0.119544
50	0	0.268782	0.502899	0.135676	0.302453	0.107337		0.516047	0.188553	0.134427	0.279676	0.119214
50.1471	0	0.27988	0.469093	0.131984	0.293652	0.0975583		0.438769	0.245703	0.123675	0.269382	0.091727
50.2941	0	0.2349	0.452203	0.148589	0.278564	0.0903242		0.441852	0.234115	0.105469	0.260479	0.0979961
50.4412	0	0.259713	0.446793	0.135696	0.280734	0.0904188		0.306138	0.161148	0.108003	0.191763	0.0592098
50.5882	0	0.26293	0.324024	0.122581	0.236512	0.0596328		0.181232	0.195589	0.084819	0.15388	0.0347782
50.7353	0	0.257971	0.325951	0.109407	0.231109	0.0639375		0.188832	0.149134	0.0717807	0.136582	0.0343677
50.8824	0	0.223058	0.312516	0.0851647	0.206913	0.0661252		0.2942	0.110583	0.0868275	0.16387	0.0655247
51.0294	0	0.142797	0.278056	0.0905949	0.170483	0.055858		0.190036	0.143068	0.0905203	0.141208	0.0287427
51.1765	0	0.147019	0.222321	0.0768337	0.148724	0.0420071		0.156838	0.0835003	0.0837134	0.108017	0.0244104
51.3235	0	0.175855	0.202071	0.0828946	0.153607	0.0361571		0.281521	0.0480892	0.0998867	0.143165	0.0707751
51.4706	0	0.206045	0.137769	0.0561967	0.133337	0.0433142		0.173812	0.0234216	0.0849336	0.0940558	0.043653
51.6176	0	0.153368	0.0961771	0.0463163	0.0986205	0.0309273		0.212733	0.0777532	0.0629885	0.117825	0.047645
51.7647	0	0.145957	0.0961695	0.0440737	0.0954001	0.0294137		0.233602	-0.00865103	0.0622853	0.0957453	0.0719057
51.9118	0	0.112159	0.100363	0.0400426	0.0841884	0.022334		0.201147	0.0119916	0.0578624	0.0903338	0.0569671
52.0588	0	0.112399	0.0523293	0.0421806	0.0689698	0.0219115		0.171252	0.0353911	0.0370735	0.081239	0.0450093
52.2059	0	0.0902042	0.0177399	0.0210219	0.0429887	0.0236267		0.128457	0.0107477	0.0295189	0.0562411	0.0365122
52.3529	0	0.0488041	0.0289323	0.0126843	0.0301402	0.0104444		0.0627563	0.00795976	0.0215626	0.0307596	0.0164732
52.5		0	0	0				0	0	0
52.6471		0	0	0				0	0	0
52.7941		0	0	0				0	0	0
52.9412		0	0	0				0	0	0
53.0882		0	0	0				0	0	0
53.2353		0	0	0				0	0	0
53.3824		0	0	0				0	0	0

## Sheet: gamma3
time	stimulus	2P_fly1	2P_fly2	2P_fly3	2P average	sem		3P_fly1	3P_fly2	3P_fly3	3P average	sem
-47.9412	0	0.55582	-0.0460523	0.0237959	0.177854	0.190055		0.393358	-0.128344	0.0495689	0.104861	0.153119
-47.7941	0	0.552796	-0.0640549	0.0202968	0.169679	0.1931		0.366168	-0.106289	0.0485	0.102793	0.139062
-47.6471	0	0.878397	0.123898	0.026143	0.342813	0.269275		0.848563	-0.238277	0.05857	0.222952	0.324331
-47.5	0	1.21342	0.760702	0.0342707	0.669466	0.343436		2.10561	0.317107	0.0670575	0.829925	0.641914
-47.3529	0	0.55582	-0.0460523	0.0237959	0.177854	0.190055		0.393358	-0.128344	0.0495689	0.104861	0.153119
-47.2059	0	0.552796	-0.0640549	0.0202968	0.169679	0.1931		0.366168	-0.106289	0.0485	0.102793	0.139062
-47.0588	0	0.878397	0.123898	0.026143	0.342813	0.269275		0.848563	-0.238277	0.05857	0.222952	0.324331
-46.9118	0	1.21342	0.760702	0.0342707	0.669466	0.343436		2.10561	0.317107	0.0670575	0.829925	0.641914
-46.7647	0	1.38723	0.998247	0.0363004	0.80726	0.401502		2.97188	1.02897	0.0740804	1.35831	0.852576
-46.6176	0	1.01874	1.49979	0.037842	0.852123	0.430171		2.12606	1.62269	0.0772495	1.27533	0.616415
-46.4706	0	0.962348	1.40051	0.0298249	0.79756	0.404169		2.06859	1.65281	0.0798524	1.26708	0.605628
-46.3235	0	1.00764	1.42578	0.0305558	0.821323	0.413399		1.982	1.711	0.0826034	1.25854	0.593148
-46.1765	0	0.987025	1.4229	0.0316974	0.813875	0.410832		1.96754	1.6386	0.0882466	1.23146	0.579441
-46.0294	0	0.96153	1.48831	0.0360015	0.828615	0.424481		2.03919	1.63778	0.0844133	1.25379	0.596062
-45.8824	0	0.49766	1.29745	0.0285685	0.607891	0.370417		1.46549	1.81318	0.0629473	1.11387	0.534962
-45.7353	0	0.103892	0.674601	0.0132999	0.263931	0.206994		0.157807	1.30027	0.0469004	0.50166	0.400587
-45.5882	0	-0.00268894	0.409737	0.00417254	0.137073	0.136346		-0.639225	0.639605	0.0343038	0.0115615	0.369341
-45.4412	0	0.363056	-0.0720922	0.00230747	0.0977571	0.134377		0.207233	0.0124744	0.0325085	0.0840721	0.0618516
-45.2941	0	0.279613	-0.06716	0.00419601	0.0722162	0.105724		0.158535	-0.0272355	0.0347813	0.0553601	0.0546054
-45.1471	0	0.160302	-0.0710494	0.0101783	0.0331435	0.0677652		0.177725	-0.0556597	0.0322288	0.0514313	0.068053
-45	0	0.237548	-0.0961719	0.00806564	0.049814	0.0985723		0.247763	-0.0282194	0.0289538	0.0828326	0.0841008
-44.8529	0	0.254136	-0.159574	7.09273e-05	0.0315443	0.12046		0.195325	-0.0123147	0.0216876	0.0682327	0.0642998
-44.7059	0	0.316886	-0.142512	0.00225606	0.0588769	0.135605		0.22905	-0.0194377	0.0325219	0.0807115	0.0756708
-44.5588	0	0.334491	-0.0979811	0.0120604	0.0828569	0.129765		0.216797	-0.0205748	0.0356769	0.0772997	0.071614
-44.4118	0	0.193493	-0.114382	0.0137258	0.0309453	0.0892919		0.189691	-0.0223248	0.0391536	0.0688399	0.0629778
-44.2647	0	0.146415	-0.17936	0.013459	-0.00649526	0.0945707		0.14271	-0.0562494	0.030445	0.0389685	0.0575925
-44.1176	0	0.223434	-0.172193	0.00986077	0.020367	0.114328		0.156549	-0.0289211	0.0252303	0.0509528	0.0550638
-43.9706	0	0.256175	-0.217281	-0.00374308	0.011717	0.136894		0.182592	-0.0128951	0.0198196	0.0631722	0.0604522
-43.8235	0	0.253116	-0.204836	-0.00650764	0.013924	0.132594		0.158881	0.0433739	0.0197633	0.0740059	0.0429811
-43.6765	0	0.191897	-0.110615	-0.0048314	0.0254834	0.0886334		0.11464	0.0815043	0.0299404	0.0753617	0.024643
-43.5294	0	0.100905	-0.112026	-0.00426277	-0.00512811	0.0614694		0.177314	0.0780096	0.0319522	0.0957585	0.0428904
-43.3824	0	0.0948277	-0.189124	-0.0117179	-0.0353381	0.0828162		0.249402	0.0143044	0.0334353	0.0990472	0.0753799
-43.2353	0	0.190535	-0.177551	-0.0179618	-0.0016592	0.106569		0.240441	-0.0254266	0.0299003	0.0816381	0.0809917
-43.0882	0	0.116682	-0.129115	-0.0266893	-0.0130407	0.0712831		0.237666	-0.0132207	0.0349614	0.0864688	0.0768673
-42.9412	0	0.0893266	-0.155763	-0.0248624	-0.0304331	0.0708062		0.242717	-0.0449729	0.0351215	0.0776219	0.0857246
-42.7941	0	0.0713846	-0.133851	-0.0179112	-0.0267924	0.0594125		0.256618	-0.0672627	0.0327819	0.0740459	0.0957458
-42.6471	0	-0.00569374	-0.0867543	-0.0136282	-0.0353587	0.0257996		0.280016	-0.125985	0.0287461	0.060926	0.118302
-42.5	0	0.0140024	-0.186403	-0.0124412	-0.061614	0.0628598		0.352009	-0.193355	0.0271462	0.0619332	0.158391
-42.3529	0	0.0784593	-0.209926	-0.0155281	-0.0489981	0.0849149		0.259533	-0.193853	0.0197603	0.02848	0.130954
-42.2059	0	0.129185	-0.152505	-0.0169105	-0.0134102	0.0813359		0.149956	-0.152794	0.0164308	0.0045307	0.0875988
-42.0588	0	0.068386	-0.13842	-0.0105198	-0.0268512	0.0602556		0.1116	-0.100524	0.0196079	0.0102281	0.0614144
-41.9118	0	0.140868	-0.172755	-0.00177271	-0.01122	0.0906583		0.067296	0.0135688	0.0213838	0.0340828	0.0167591
-41.7647	0	0.113748	-0.161485	0.000992554	-0.0155815	0.0798839		0.0648888	0.128237	0.019377	0.0708341	0.0315654
-41.6176	0	0.0850292	-0.165172	-0.000586366	-0.0269096	0.0734161		0.0338057	0.131979	0.0252752	0.0636867	0.034235
-41.4706	0	0.101398	-0.183615	-0.00506073	-0.0290925	0.083149		0.0519439	0.14004	0.0284252	0.0734698	0.0339706
-41.3235	0	0.180271	-0.14493	-0.00228854	0.0110174	0.0941127		0.0514817	0.12421	0.0318724	0.0691881	0.0280874
-41.1765	0	0.244228	-0.0812106	0.000521618	0.0545131	0.0977478		0.109065	0.117527	0.0405233	0.0890384	0.0243803
-41.0294	0	0.162449	-0.114435	0.00758096	0.0185316	0.0801168		0.114414	0.117672	0.0412246	0.0911035	0.0249572
-40.8824	0	0.183733	-0.148377	0.00183619	0.0123972	0.0960174		0.213791	0.168477	0.0370572	0.139775	0.0529986
-40.7353	0	0.202629	-0.118535	-0.000899619	0.0277313	0.0938109		0.224945	0.106195	0.0389608	0.123367	0.0543712
-40.5882	0	0.257679	-0.112219	-0.00344585	0.0473378	0.109758		0.228573	0.0317955	0.0423415	0.100903	0.0639073
-40.4412	0	0.292136	-0.100781	0.00136059	0.0642385	0.117702		0.216113	0.0711651	0.0461827	0.111154	0.052973
-40.2941	0	0.290083	-0.109143	0.00745654	0.0627987	0.118522		0.167189	0.0678674	0.0442261	0.0930941	0.0376707
-40.1471	0	0.240928	-0.0841656	0.00536252	0.0540415	0.0969512		0.0769782	0.0868517	0.0388785	0.0675695	0.0146259
-40	0	0.147383	-0.133703	0.0040427	0.00590745	0.081148		0.0385933	0.0643444	0.0322127	0.0450501	0.00982141
-39.8529	0	0.166773	-0.117225	0.00130968	0.0169523	0.0823554		0.129472	0.0460789	0.0314629	0.0690047	0.0305267
-39.7059	0	0.164186	-0.0440212	0.00296364	0.0410426	0.0630477		0.0589805	-0.031571	0.0380202	0.0218099	0.0273677
-39.5588	0	0.182068	-0.0535156	0.000439397	0.0429972	0.0712584		0.0862944	-0.0495361	0.0380079	0.0249221	0.039753
-39.4118	0	0.164105	-0.0236414	0.00390116	0.0481215	0.0585342		0.051454	-0.061894	0.0346397	0.00806653	0.0353154
-39.2647	0	0.189413	0.0239686	0.00131816	0.0715666	0.0592849		0.101288	-0.0804945	0.0327058	0.0178332	0.0530004
-39.1176	0	0.167235	0.0429531	-0.0045317	0.068552	0.05121		0.101694	-0.076774	0.0297424	0.0182207	0.0518403
-38.9706	0	0.178766	0.037428	-0.00519074	0.0703344	0.0555942		0.0991577	-0.105537	0.026935	0.00685195	0.0599374
-38.8235	0	0.207136	0.0520495	-0.00665249	0.0841775	0.0637717		0.220342	-0.0872788	0.029569	0.0542107	0.0896531
-38.6765	0	0.244995	0.103405	-0.00734282	0.113686	0.073025		0.095774	-0.11053	0.0335011	0.0062483	0.0610939
-38.5294	0	0.272917	0.0740282	-0.00485297	0.114031	0.082642		0.10512	-0.127523	0.0282051	0.00193402	0.0684311
-38.3824	0	0.280095	0.0550137	-0.00462473	0.110161	0.0866934		0.126837	-0.138015	0.0219833	0.00360161	0.0770067
-38.2353	0	0.27878	-0.0249756	-0.00769197	0.0820377	0.0984979		0.198649	-0.110028	0.0205257	0.0363824	0.0894593
-38.0882	0	0.256441	-0.0922529	-0.00892862	0.0517532	0.105133		0.194628	-0.123439	0.0105712	0.0272532	0.0921961
-37.9412	0	0.29379	-0.131035	-0.00709299	0.0518872	0.126132		0.217345	-0.103372	0.0129921	0.0423219	0.0937374
-37.7941	0	0.308394	-0.110296	0.000672788	0.0662569	0.125235		0.325998	-0.0670941	0.0190279	0.0926439	0.119296
-37.6471	0	0.339671	-0.10883	0.00508768	0.0786428	0.134593		0.18353	-0.0517052	0.0112001	0.0476751	0.0703131
-37.5	0	0.285575	-0.135224	0.00821526	0.0528554	0.123508		0.250553	0.00735089	0.0022477	0.086717	0.081931
-37.3529	0	0.204518	-0.183653	0.00169684	0.00752072	0.112093		0.205564	0.0434036	-0.00528627	0.081227	0.0637375
-37.2059	0	0.203991	-0.13872	-0.00381191	0.0204866	0.0996753		0.193804	0.0608538	-0.0119156	0.0809142	0.0602273
-37.0588	0	0.179678	-0.100326	-0.00507252	0.02476	0.082195		0.165148	0.0289773	-0.0043904	0.0632449	0.051854
-36.9118	0	0.146197	-0.0955269	-0.00324397	0.0158086	0.0704268		0.152342	0.0205097	0.00386417	0.0589054	0.0469649
-36.7647	0	0.114087	-0.064628	-0.000292013	0.016389	0.0522604		0.157733	0.0192393	0.00691231	0.0612949	0.0483502
-36.6176	0	0.110285	-0.0684746	-0.00583248	0.0119925	0.0523673		0.0817596	-0.00629864	0.00123315	0.0255647	0.0281814
-36.4706	0	0.0657347	-0.0747887	-0.0107394	-0.0065978	0.0406184		0.188539	-0.00687823	-0.00268383	0.059659	0.0644514
-36.3235	0	0.182932	-0.114501	-0.0158291	0.0175341	0.0874671		0.315934	-0.0536901	0.00577212	0.0893386	0.11459
-36.1765	0	0.290216	-0.0562497	-0.0100962	0.0746233	0.108616		0.37368	-0.0944286	0.0143805	0.0978773	0.141433
-36.0294	0	0.35856	-0.114325	-0.00102758	0.0810691	0.142548		0.378967	-0.0712813	0.0276363	0.111774	0.136614
-35.8824	0	0.487299	-0.0978092	0.000465622	0.129985	0.180896		0.402644	0.0238504	0.0227168	0.149737	0.126454
-35.7353	0	0.5555	-0.0752959	-0.00111001	0.159698	0.199056		0.379284	0.00835756	0.019974	0.135872	0.121752
-35.5882	0	0.557913	-0.111769	-0.00370883	0.147478	0.207575		0.348864	0.060951	0.0150638	0.141626	0.104462
-35.4412	0	0.602993	-0.152827	-0.00647604	0.147897	0.231437		0.366109	0.108665	0.0166683	0.163814	0.104576
-35.2941	0	0.675644	-0.162174	-0.00897267	0.168166	0.257565		0.277595	0.0607756	0.0182376	0.118869	0.080307
-35.1471	0	0.663766	-0.0907045	-0.000781766	0.19076	0.237923		0.167949	0.0536266	0.0130017	0.0781924	0.0463852
-35	0	0.561377	-0.105131	-0.00200036	0.151415	0.207132		0.265942	0.104052	0.00500216	0.124999	0.0760514
-34.8529	0	0.516215	-0.0651348	-0.00441825	0.148887	0.184498		0.312439	0.0719582	-0.00771983	0.125559	0.0962294
-34.7059	0	0.446869	-0.0677674	-0.00461926	0.124828	0.162049		0.310796	-0.0261407	-0.00853264	0.092041	0.109496
-34.5588	0	0.464993	-0.0856042	-0.00403974	0.125116	0.171562		0.37711	0.0874817	-0.00806333	0.152176	0.1158
-34.4118	0	0.47989	-0.0751575	-0.00231294	0.13414	0.174149		0.348337	0.0183364	-0.000395206	0.122093	0.113251
-34.2647	0	0.467333	-0.0789397	0.00281751	0.130404	0.17011		0.358343	-0.0330709	-0.00141828	0.107951	0.125529
-34.1176	0	0.404258	-0.0664517	0.00212895	0.113312	0.146814		0.367168	-0.00285759	0.00211293	0.122141	0.122522
-33.9706	0	0.347173	-0.0894855	-0.00563559	0.0840173	0.133786		0.349841	0.019393	-0.0038218	0.121804	0.114215
-33.8235	0	0.369576	-0.104459	-0.00702622	0.0860302	0.144536		0.194124	-0.0207529	-0.00117825	0.0573975	0.0685962
-33.6765	0	0.251355	-0.0990404	-0.00290381	0.0498037	0.104527		0.161368	-0.0122798	0.00779849	0.0522956	0.0548434
-33.5294	0	0.22844	-0.111581	0.00249528	0.0397848	0.099911		0.182257	-0.00549646	0.0117348	0.0628316	0.0599193
-33.3824	0	0.227727	-0.0955155	0.0089275	0.0470463	0.0952386		0.089202	-0.0853933	0.0118347	0.00521445	0.0505099
-33.2353	0	0.213272	-0.106846	0.0121456	0.0395236	0.0934185		0.121526	-0.100802	0.00807942	0.00960098	0.0641851
-33.0882	0	0.182539	0.0303349	0.0113385	0.0747375	0.054179		0.0877692	-0.0727074	0.00815807	0.00773997	0.0463261
-32.9412	0	0.204596	-0.0264368	0.0147345	0.064298	0.0711489		0.178138	-0.0551469	0.0101707	0.0443871	0.0694826
-32.7941	0	0.239032	-0.0582095	0.0152105	0.0653445	0.0893929		0.223272	-0.046524	0.0238479	0.0668653	0.0807988
-32.6471	0	0.358489	-0.020706	0.0201717	0.119318	0.120166		0.265895	-0.0786452	0.0329257	0.073392	0.101497
-32.5	0	0.382389	-0.0462074	0.0203316	0.118838	0.133168		0.255471	-0.116112	0.0307425	0.0567005	0.108049
-32.3529	0	0.403982	-0.0541478	0.0155854	0.121807	0.142517		0.238935	-0.0442538	0.0290319	0.0745711	0.0848614
-32.2059	0	0.357913	-0.0839548	0.00843688	0.0941315	0.13456		0.265945	-0.0556555	0.0294174	0.0799023	0.0962086
-32.0588	0	0.338808	-0.0830131	0.00681268	0.0875357	0.128284		0.349412	-0.0191803	0.0326415	0.120958	0.115203
-31.9118	0	0.471242	-0.17815	0.00945327	0.100849	0.192953		0.441755	0.011372	0.0393871	0.164171	0.139027
-31.7647	0	0.453726	-0.118769	0.0137028	0.11622	0.173032		0.31269	-0.00420322	0.0457429	0.118077	0.0983691
-31.6177	0	0.373592	-0.140543	0.0174775	0.0835089	0.152046		0.308533	0.0346527	0.0390298	0.127405	0.0905727
-31.4706	0	0.332983	-0.199645	0.0120553	0.0484645	0.154831		0.347612	0.0814198	0.0385575	0.155863	0.0966697
-31.3235	0	0.395693	-0.120961	0.00683261	0.0938549	0.155363		0.308505	0.103188	0.0348335	0.148842	0.0822338
-31.1765	0	0.368579	-0.109194	0.00681378	0.0887329	0.143875		0.249645	0.106476	0.0390876	0.131736	0.0620809
-31.0294	0	0.31241	-0.0629024	0.0137323	0.0877467	0.114489		0.275472	0.112627	0.0454992	0.144533	0.0682774
-30.8823	0	0.324492	-0.0594443	0.0158051	0.0936174	0.117463		0.193715	0.128959	0.0462965	0.12299	0.0426607
-30.7353	0	0.20402	-0.0941178	0.00999007	0.0399642	0.0873602		0.152024	0.0910695	0.0427658	0.0952863	0.0316104
-30.5882	0	0.179102	-0.0887894	0.00317648	0.0311631	0.0785895		0.213985	0.0792304	0.0320239	0.108413	0.0545166
-30.4412	0	0.274872	-0.0770083	0.00057941	0.0661479	0.106739		0.15969	0.136686	0.0335571	0.109978	0.0387831
-30.2941	0	0.135598	-0.0587173	0.00218343	0.0263546	0.0573811		0.0964565	0.121151	0.0324075	0.0833384	0.0264444
-30.1471	0	0.0916216	-0.0948087	0.00817095	0.00166126	0.0539161		0.147281	0.0911315	0.0405524	0.0929885	0.030824
-30	0	0.133887	-0.0861897	0.0106499	0.019449	0.0636828		0.187107	0.0138978	0.0353818	0.0787957	0.0545098
-29.8529	0	0.178413	-0.0834262	0.00599604	0.0336609	0.0768417		0.105985	-0.0192631	0.017747	0.0348228	0.0371503
-29.7059	0	0.243268	-0.0188638	0.0041445	0.0761828	0.0838061		0.126538	-0.0639221	0.00814297	0.0235864	0.0555207
-29.5588	0	0.234887	-0.0602431	0.00421101	0.0596182	0.0895877		0.142271	-0.00656813	0.00694639	0.0475499	0.0475212
-29.4118	0	0.291719	-0.0192121	0.00867478	0.0937274	0.0993228		0.174641	0.0188332	0.0161284	0.0698675	0.0523925
-29.2647	0	0.221549	-0.0101844	0.0101883	0.0738509	0.0740828		0.184729	-0.127842	0.0170874	0.0246581	0.0903109
-29.1177	0	0.342106	0.0154429	0.0104311	0.12266	0.109733		0.351609	-0.116981	0.00957799	0.081402	0.139956
-28.9706	0	0.395264	0.0241658	0.00543654	0.141622	0.126936		0.360462	-0.138452	-0.000448728	0.0738537	0.148738
-28.8235	0	0.320719	0.000358809	0.00443851	0.108505	0.106113		0.34085	-0.110698	-0.011994	0.0727193	0.13706
-28.6765	0	0.446512	0.0223804	0.000689157	0.156527	0.145128		0.444082	-0.0531596	-0.0023993	0.129508	0.157968
-28.5294	0	0.438233	0.00810031	0.000154131	0.148829	0.14472		0.446319	0.018775	0.00556189	0.156885	0.144767
-28.3823	0	0.388961	0.0770179	0.00663576	0.157538	0.117482		0.383137	-0.0383377	0.00578827	0.116863	0.133745
-28.2353	0	0.397665	0.014104	0.00429522	0.138688	0.129519		0.315665	-0.0304741	-0.0061043	0.093029	0.11154
-28.0882	0	0.379135	0.03739	-0.000609289	0.138638	0.120747		0.277339	0.0952558	-0.016088	0.118836	0.0855217
-27.9412	0	0.365212	0.00700126	-0.0084065	0.121269	0.122053		0.202578	0.0940443	-0.0192003	0.0924742	0.0640268
-27.7941	0	0.327885	-0.0431169	-0.0129796	0.090596	0.118963		0.12017	0.163195	-0.0153559	0.0893364	0.0537994
-27.6471	0	0.375263	-0.044414	-0.0147125	0.105379	0.135214		0.105684	0.154459	-0.000714211	0.0864764	0.0458126
-27.5	0	0.208381	-0.0964892	-0.0104692	0.0338074	0.0907501		-0.0119535	0.143785	-0.00242555	0.0431352	0.0503998
-27.3529	0	0.243317	-0.0807727	-0.00978994	0.050918	0.0983575		-0.0713134	0.0828477	-0.0121159	-0.000193848	0.0448999
-27.2059	0	0.244294	-0.133571	-0.017957	0.0309221	0.111785		0.089197	0.168557	-0.0151611	0.0808643	0.0531982
-27.0588	0	0.3028	-0.110323	-0.018637	0.0579466	0.125255		0.107982	0.144204	-0.0126145	0.0798573	0.0474035
-26.9118	0	0.33256	-0.0999241	-0.0166054	0.0720101	0.132477		0.144251	0.0701761	-0.00341462	0.0703374	0.0426274
-26.7647	0	0.294785	-0.0946227	-0.00602581	0.0647121	0.117845		0.0403102	0.113498	0.00662976	0.0534793	0.031545
-26.6177	0	0.300177	-0.0832558	-0.0032758	0.0712152	0.116786		0.0695261	0.108312	0.0039399	0.0605927	0.030459
-26.4706	0	0.342882	-0.0372493	-0.00496002	0.100224	0.121686		0.104433	0.0677844	-0.0121669	0.0533503	0.0344246
-26.3235	0	0.405823	-0.00551072	-0.0151206	0.128397	0.138741		0.216383	0.0530595	-0.011491	0.085984	0.0678103
-26.1765	0	0.59747	-0.0902323	-0.0231525	0.161362	0.218912		0.333234	0.0692383	-0.00911374	0.13112	0.103557
-26.0294	0	0.692857	-0.0242587	-0.0229042	0.215231	0.238813		0.236165	-0.0191197	-0.00891133	0.0693781	0.0834456
-25.8823	0	0.550904	-0.0234069	-0.0186958	0.169601	0.190657		0.27745	-0.0109596	-0.00507364	0.0871388	0.0951706
-25.7353	0	0.528835	-0.0816379	-0.020732	0.142155	0.194138		0.29656	-0.0491795	-0.00870226	0.0795594	0.109128
-25.5882	0	0.54761	-0.067526	-0.0273272	0.150919	0.198685		0.331123	-0.107385	-0.0180266	0.0685705	0.133786
-25.4412	0	0.504605	-0.0505145	-0.0331315	0.14032	0.182212		0.365091	-0.0315244	-0.0256901	0.102626	0.131244
-25.2941	0	0.478535	-0.0614898	-0.0350624	0.127327	0.175769		0.437937	0.0201648	-0.0169077	0.147065	0.145829
-25.1471	0	0.44898	-0.0480242	-0.0273821	0.124524	0.162337		0.491833	0.00507488	-0.00630722	0.163534	0.164183
-25	0	0.166903	0.042067	-0.0207449	0.0627416	0.0551467		0.379095	-0.0178982	0.00360033	0.121599	0.128897
-24.8529	0	0.05575	0.00167538	-0.0186139	0.0129372	0.0221932		0.331579	0.0333959	0.00407962	0.123018	0.104623
-24.7059	0	0.211962	-0.0103744	-0.0211709	0.0601388	0.0759754		0.274727	0.0198108	-0.00507159	0.0964888	0.0894082
-24.5588	0	0.233956	0.0234419	-0.0191902	0.0794026	0.0782506		0.301774	0.0472518	-0.00372989	0.115099	0.094491
-24.4118	0	0.230028	-0.0182122	-0.0175632	0.0647508	0.0826387		0.323363	0.0805336	-0.00162307	0.134091	0.0975625
-24.2647	0	0.262567	-0.0412348	-0.00376949	0.0725208	0.0956365		0.323038	-0.0310598	0.0192353	0.103738	0.110607
-24.1177	0	0.179223	-0.0458122	0.00441061	0.0459404	0.0682		0.208431	-0.0553587	0.0298842	0.0609856	0.0777212
-23.9706	0	0.159173	-0.0968588	0.00805106	0.023455	0.0743102		0.198316	-0.038938	0.0187986	0.0593921	0.0714334
-23.8235	0	0.191169	-0.1444	0.0107785	0.0191825	0.0969614		0.267263	-0.0426829	0.0130462	0.0792087	0.0953934
-23.6765	0	0.28222	-0.0591716	0.00600217	0.0763502	0.10464		0.269939	-0.0250786	0.0165787	0.0871465	0.0921841
-23.5294	0	0.217541	-0.0925035	0.0051313	0.0433897	0.0915236		0.33645	-0.0155871	0.031523	0.117462	0.110335
-23.3823	0	0.213584	-0.0143136	0.012316	0.0705289	0.0719396		0.277263	-0.0276973	0.0478677	0.0991444	0.0916918
-23.2353	0	0.113444	0.0494698	0.0173691	0.0600942	0.0282386		0.261293	-0.0380793	0.0637998	0.0956713	0.0878784
-23.0882	0	0.124774	0.0539816	0.0191618	0.0659725	0.0310715		0.210385	-0.0358968	0.0587976	0.0777621	0.0717251
-22.9412	0	0.212458	0.0488123	0.0182738	0.0931814	0.0602864		0.272746	-0.0802282	0.0530559	0.0818579	0.102908
-22.7941	0	0.229639	0.109503	0.0175823	0.118908	0.0613957		0.224876	-0.0456465	0.0625284	0.080586	0.0786133
-22.6471	0	0.264031	0.12229	0.0172979	0.13454	0.0714885		0.196738	-0.0205282	0.0772096	0.0844732	0.0628244
-22.5	0	0.198062	0.0321124	0.0290271	0.0864006	0.055838		0.234125	-0.0990585	0.0970824	0.0773829	0.0966848
-22.3529	0	0.149754	0.0860656	0.0407163	0.0921788	0.0316247		0.17825	-0.127435	0.107228	0.0526809	0.0923624
-22.2059	0	0.142069	-0.0191696	0.0457088	0.0562027	0.0468404		0.209181	-0.174621	0.109018	0.0478594	0.114937
-22.0588	0	0.25383	-0.0377518	0.0530168	0.0896983	0.0861474		0.19444	-0.171889	0.105633	0.0427284	0.110328
-21.9118	0	0.232059	-0.0753201	0.0522152	0.0696515	0.08916		0.288264	-0.167303	0.110155	0.0770385	0.132549
-21.7647	0	0.284208	-0.106794	0.0558989	0.0777709	0.113401		0.242533	-0.0741992	0.125024	0.0977858	0.0924413
-21.6177	0	0.262599	-0.162326	0.0639643	0.0547458	0.122752		0.179013	-0.0700421	0.143402	0.0841245	0.0777657
-21.4706	0	0.175646	-0.179481	0.0805563	0.0255737	0.106138		0.169218	-0.0581009	0.146676	0.0859308	0.0723093
-21.3235	0	0.144699	-0.146338	0.0889058	0.0290888	0.0891799		0.147056	-0.0441014	0.146266	0.0830736	0.0635879
-21.1765	0	0.162929	-0.169696	0.0876745	0.0269693	0.100704		0.258115	-0.0339244	0.146259	0.123483	0.0850701
-21.0294	0	0.15648	-0.163098	0.0864925	0.0266247	0.096989		0.235072	0.0223647	0.146694	0.13471	0.0616948
-20.8823	0	0.133765	-0.218659	0.0856267	0.000244504	0.11033		0.225737	0.011928	0.159914	0.132526	0.0632221
-20.7353	0	0.174983	-0.17636	0.0950271	0.0312167	0.106324		0.13757	0.047541	0.176344	0.120485	0.038151
-20.5882	0	0.104946	-0.11521	0.101562	0.0304329	0.0728279		0.164809	-0.00476513	0.178346	0.112797	0.0589106
-20.4412	0	0.135698	-0.137877	0.102253	0.0333582	0.0861601		0.213878	-0.0419856	0.165925	0.112606	0.0785253
-20.2941	0	0.180982	-0.13671	0.0883363	0.0442029	0.0943271		0.205372	-0.0454107	0.157153	0.105705	0.0768293
-20.1471	0	0.264592	-0.135757	0.0771	0.0686448	0.115648		0.250974	-0.0102441	0.149125	0.129951	0.0760141
-20	0	0.330376	-0.129381	0.0798643	0.0936198	0.132898		0.111756	0.0473811	0.155133	0.104757	0.0313015
-19.8529	0	0.279361	-0.134664	0.0848755	0.0765244	0.119592		0.166458	0.0675093	0.158123	0.130697	0.0316853
-19.7059	0	0.272529	-0.0795089	0.0906648	0.0945618	0.101643		0.1957	0.107183	0.14447	0.149118	0.0256578
-19.5588	0	0.173093	-0.101533	0.0874367	0.0529987	0.0811261		0.191547	0.0613187	0.127599	0.126822	0.0375958
-19.4118	0	0.247534	-0.17103	0.0815626	0.0526891	0.121689		0.170375	0.123569	0.115291	0.136412	0.017149
-19.2647	0	0.212693	-0.0975164	0.0756727	0.0636166	0.0897525		0.17625	0.17058	0.112402	0.153077	0.0204035
-19.1177	0	0.280942	-0.0584466	0.0859856	0.102827	0.0983344		0.184163	0.206072	0.11808	0.169438	0.0264463
-18.9706	0	0.197942	-0.0791711	0.0989138	0.0725616	0.0810736		0.114856	0.16177	0.114849	0.130492	0.0156392
-18.8235	0	0.071676	-0.054655	0.103038	0.0400196	0.0481953		0.102915	0.0968471	0.0978568	0.0992064	0.00187728
-18.6765	0	0.128282	-0.0413917	0.0922127	0.0597009	0.0516075		0.0915595	0.0916286	0.0793201	0.0875027	0.00409135
-18.5294	0	0.180344	-0.0357307	0.0815809	0.0753979	0.0624518		0.108823	0.0665272	0.0752114	0.0835206	0.0128973
-18.3823	0	0.245705	-0.054831	0.0743781	0.0884174	0.0870408		0.148567	0.0916594	0.0742576	0.104828	0.0224389
-18.2353	0	0.134212	-0.0308084	0.0794611	0.0609549	0.0485277		0.107049	0.0368395	0.0780498	0.0739796	0.0203698
-18.0882	0	0.145777	-0.0549358	0.090311	0.0603839	0.0598417		0.103961	-0.011155	0.0846226	0.0591428	0.0355894
-17.9412	0	0.0725043	-0.103475	0.080921	0.0166502	0.0601116		0.111025	-0.080609	0.066185	0.0322004	0.0578709
-17.7941	0	0.042093	-0.0888459	0.0670069	0.00675134	0.0483366		0.142246	-0.100964	0.0541845	0.0318219	0.0710935
-17.6471	0	0.145802	-0.121757	0.0539037	0.0259827	0.0784891		0.182093	-0.0863818	0.0474277	0.047713	0.0775021
-17.5	0	0.122102	-0.112422	0.0529075	0.0208624	0.0695713		0.122586	-0.129778	0.0516748	0.0148276	0.0751446
-17.3529	0	0.0367297	-0.104134	0.0561861	-0.00373933	0.0505105		0.0385519	-0.142539	0.0575652	-0.0154741	0.0637693
-17.2059	0	0.0514892	-0.0530125	0.0602051	0.0195606	0.0363737		-0.0224261	-0.131285	0.0565743	-0.0323788	0.054458
-17.0588	0	0.116872	-0.00575473	0.049293	0.05347	0.0354607		0.0870263	-0.0929795	0.0453688	0.0131386	0.0544047
-16.9118	0	0.194418	-0.0325057	0.0314244	0.0644455	0.0675558		0.099215	-0.0779715	0.0273711	0.0162049	0.0514532
-16.7647	0	0.189067	-0.051576	0.0184382	0.0519764	0.071463		0.0753802	-0.0418304	0.0346776	0.0227425	0.034358
-16.6177	0	0.276238	-0.0448356	0.0154364	0.0822794	0.0985275		0.0339179	-0.0389148	0.037773	0.0109254	0.0249449
-16.4706	0	0.238777	-0.0365407	0.0189882	0.0737414	0.0840602		0.0255802	-0.0190746	0.0480607	0.0181887	0.0197295
-16.3235	0	0.306077	0.00368081	0.0186723	0.109477	0.0983952		0.0968547	0.0233235	0.0431269	0.054435	0.0219668
-16.1765	0	0.354862	-0.0476969	0.0172173	0.108127	0.124782		0.133974	0.0363533	0.0325969	0.0676415	0.0331841
-16.0294	0	0.331263	-0.0966842	0.00542852	0.0800026	0.129042		0.19256	0.0805904	0.0184284	0.097193	0.0509484
-15.8824	0	0.280343	-0.116741	0.00420136	0.0559344	0.117511		0.168715	0.0257597	0.0193194	0.0712646	0.0487605
-15.7353	0	0.245022	-0.0980811	0.0104987	0.0524798	0.101245		0.114869	0.0148896	0.0318082	0.0538557	0.0308952
-15.5882	0	0.277679	-0.0710701	0.0236382	0.076749	0.104119		0.0595011	0.0385247	0.0333831	0.043803	0.00798818
-15.4412	0	0.230788	-0.0993717	0.0282886	0.053235	0.0961216		0.0504928	0.111279	0.0325095	0.0647604	0.0238315
-15.2941	0	0.219275	-0.0488981	0.0164421	0.062273	0.0807353		0.0932363	0.0629767	0.0105539	0.055589	0.0241525
-15.1471	0	0.260614	-0.0567063	0.0100204	0.0713093	0.0965924		0.0898556	0.0692833	0.0112134	0.0567841	0.0235466
-15	0	0.257691	-0.0577633	0.00449579	0.068141	0.0964638		0.0877809	0.118743	0.017926	0.0748168	0.0298166
-14.8529	0	0.250413	-0.00581914	0.00830877	0.0843007	0.083156		0.0651922	0.078238	0.0305216	0.0579839	0.0142382
-14.7059	0	0.273469	0.0554392	0.0172985	0.115402	0.0797968		0.0586075	0.0777951	0.028622	0.0550082	0.0143087
-14.5588	0	0.211999	0.0460596	0.0185179	0.0921921	0.0604287		0.0923476	0.123283	0.0182991	0.0779765	0.0311464
-14.4118	0	0.209149	0.0773751	0.0102822	0.0989354	0.0584112		0.174541	0.140718	0.00426728	0.106509	0.0520447
-14.2647	0	0.227003	0.114561	-0.000802923	0.113587	0.0657636		0.23606	0.15554	0.00285917	0.131486	0.0683852
-14.1176	0	0.347203	0.0641823	0.00478384	0.138723	0.105641		0.195365	0.192742	0.0251005	0.137736	0.0563228
-13.9706	0	0.24891	0.00531043	0.0064893	0.0869031	0.081004		0.127923	0.168817	0.0344544	0.110398	0.0397645
-13.8235	0	0.264682	0.0425351	0.00796883	0.105062	0.0804313		0.128034	0.119489	0.0281516	0.0918918	0.0319654
-13.6765	0	0.288457	0.0550817	0.00732898	0.116956	0.0868514		0.105422	0.134035	0.0160143	0.0851571	0.0355445
-13.5294	0	0.302588	-0.0257377	-0.0094088	0.0891472	0.106824		0.0990777	0.140278	0.0079887	0.0824481	0.0390833
-13.3824	0	0.318486	0.00646144	-0.0213225	0.101208	0.108935		0.146541	0.133777	-0.00167655	0.0928806	0.047422
-13.2353	0	0.298105	-0.00501734	-0.0218118	0.0904252	0.103953		0.107924	0.0340949	0.00982073	0.0506133	0.0294998
-13.0882	0	0.287904	0.0794182	-0.0163655	0.116986	0.0898211		0.126538	0.00713143	0.0151207	0.0495965	0.0385396
-12.9412	0	0.162633	0.0627073	-0.0120043	0.0711119	0.0505883		0.186576	-0.0173141	0.00374116	0.0576676	0.0647401
-12.7941	0	0.19892	0.148246	-0.0107007	0.112155	0.0631456		0.260136	0.024573	-0.0126353	0.0906913	0.0854006
-12.6471	0	0.238466	0.141955	-0.0198839	0.120179	0.0753696		0.328456	0.0269867	-0.0244756	0.110323	0.110074
-12.5	0	0.253938	0.127458	-0.0256123	0.118594	0.0808207		0.29521	0.0235164	-0.0264315	0.0974316	0.0999348
-12.3529	0	0.226742	0.128593	-0.0219615	0.111125	0.0723238		0.260919	0.0648324	-0.0101119	0.105213	0.0808029
-12.2059	0	0.290793	0.102492	-0.014067	0.126406	0.0888142		0.269379	-0.000982712	0.00328233	0.0905596	0.0894182
-12.0588	0	0.325611	0.136953	-0.009561	0.151001	0.0970104		0.218915	0.0638525	0.000380135	0.0943824	0.064906
-11.9118	0	0.279481	0.0199756	-0.0123844	0.0956907	0.0923687		0.222314	0.0470092	-0.00855515	0.0869228	0.0695701
-11.7647	0	0.30929	0.0660811	-0.0262961	0.116358	0.100084		0.167041	0.130108	-0.0221306	0.0916729	0.057892
-11.6176	0	0.337308	-0.00883027	-0.0312154	0.0990874	0.119285		0.168098	0.113028	-0.0264333	0.0848976	0.057891
-11.4706	0	0.207786	0.0586892	-0.0220783	0.0814656	0.0673263		0.115384	0.0845982	-0.0110179	0.0629882	0.0380553
-11.3235	0	0.158045	0.112365	-0.0170932	0.0844392	0.0524509		0.203094	0.0405541	-0.000251374	0.0811322	0.0621081
-11.1765	0	0.219889	0.0997872	-0.0142587	0.101806	0.0676002		0.190794	0.0510192	-0.0107075	0.0770352	0.0596052
-11.0294	0	0.230335	0.102951	-0.018369	0.104972	0.0718019		0.115343	0.0685889	-0.0245225	0.0531364	0.0411082
-10.8824	0	0.237209	0.0190726	-0.0283696	0.0759708	0.0817743		0.220042	0.115654	-0.037255	0.0994803	0.0747141
-10.7353	0	0.263402	0.0117018	-0.0296485	0.0818185	0.0915732		0.183589	0.146427	-0.0397161	0.0967665	0.0690794
-10.5882	0	0.250929	-0.023714	-0.0250656	0.0673831	0.0917737		0.149182	0.10122	-0.0178962	0.077502	0.0496679
-10.4412	0	0.185555	0.0203414	-0.0224495	0.0611488	0.0634176		0.117916	0.100308	-0.0128455	0.0684593	0.0409689
-10.2941	0	0.266702	0.00471668	-0.0295636	0.0806182	0.0935664		0.0999395	0.155775	-0.0230094	0.0775683	0.0528087
-10.1471	0	0.260851	-0.00548324	-0.0359916	0.0731253	0.094275		0.138961	0.212221	-0.0361457	0.105012	0.0736792
-10	0	0.170219	0.0219538	-0.0467191	0.0484847	0.0640143		0.175947	0.210866	-0.046293	0.113506	0.080533
-9.85294	0	0.0743203	0.0341303	-0.0562924	0.0173861	0.0386229		0.183349	0.195048	-0.0431645	0.111744	0.077528
-9.70588	0	0.0959717	0.126042	-0.0497642	0.0574166	0.0542889		0.107101	0.108844	-0.0255637	0.0634604	0.0445149
-9.55882	0	0.0903306	0.194988	-0.0417026	0.0812054	0.068479		0.14743	0.0734084	-0.0205069	0.066777	0.0485923
-9.41177	0	0.120279	0.209354	-0.0415009	0.0960438	0.0734224		0.186979	0.0891195	-0.0322017	0.081299	0.0633927
-9.26471	0	0.12364	0.201594	-0.0450401	0.093398	0.0727852		0.147242	0.0979315	-0.0391253	0.0686827	0.0557519
-9.11765	0	0.135124	0.190499	-0.0480402	0.0925277	0.0720789		0.145226	0.0891255	-0.0412916	0.0643533	0.0552493
-8.97059	0	0.183514	0.119938	-0.0486366	0.0849384	0.0692633		0.0399742	0.0623832	-0.0349488	0.0224696	0.029429
-8.82353	0	0.193068	0.105574	-0.0354429	0.087733	0.0665658		0.0689825	-0.0186872	-0.0222168	0.00935948	0.0298289
-8.67647	0	0.22446	0.0702263	-0.0224323	0.0907512	0.0720067		0.0630591	0.0444509	-0.0237016	0.0279361	0.0263717
-8.52941	0	0.174532	-0.00765313	-0.0227807	0.0480326	0.0634001		0.110923	0.116421	-0.0385336	0.0629371	0.0507601
-8.38235	0	0.159795	-0.0607718	-0.0334094	0.0218713	0.0694128		0.065822	0.0970492	-0.0506484	0.0374076	0.0449414
-8.23529	0	0.103894	-0.05558	-0.0378438	0.00349008	0.0504624		0.022578	0.0569852	-0.0496971	0.00995536	0.0314366
-8.08823	0	0.0669155	-0.0285124	-0.0349062	0.00116559	0.0329267		0.0317361	0.0384002	-0.0401211	0.0100051	0.0251368
-7.94118	0	0.0580993	-0.0769232	-0.0286811	-0.015835	0.0395033		0.0326859	0.0188887	-0.0270819	0.00816424	0.0180675
-7.79412	0	0.0474794	-0.0719137	-0.0237888	-0.0160744	0.034681		0.0358208	0.028424	-0.0238081	0.0134789	0.0187654
-7.64706	0	0.0604322	-0.0797604	-0.0315956	-0.0169746	0.0411251		0.015681	0.0492956	-0.0336628	0.0104379	0.0240911
-7.5	0	0.0661576	-0.0379104	-0.0408507	-0.00420115	0.0351896		-0.0223933	0.020865	-0.0412217	-0.01425	0.0183796
-7.35294	0	0.123496	-0.0259196	-0.0480636	0.0165043	0.0538765		-0.0945578	-0.0298279	-0.0426391	-0.0556749	0.0197901
-7.20588	0	0.16822	-0.0340163	-0.0449898	0.029738	0.0693135		-0.0326387	0.0821606	-0.0284287	0.00703105	0.0375844
-7.05882	0	0.11062	-0.0110737	-0.036631	0.0209718	0.0454273		0.0178636	0.103778	-0.0245394	0.0323675	0.0377453
-6.91176	0	0.181639	-0.043204	-0.0310363	0.0357995	0.0730042		0.0334694	0.134446	-0.0262709	0.0472149	0.0469014
-6.76471	0	0.232768	-0.0702127	-0.0379518	0.0415344	0.0960691		0.108181	0.0810124	-0.0431854	0.0486694	0.0465923
-6.61765	0	0.223419	-0.0616187	-0.0480287	0.0379239	0.0928306		0.165902	0.125447	-0.0543668	0.0789941	0.0676954
-6.47059	0	0.24711	-0.0216869	-0.0525366	0.0576288	0.0951582		0.172895	0.13859	-0.0505404	0.0869817	0.0694705
-6.32353	0	0.237559	-0.0359379	-0.0444637	0.0523856	0.0926192		0.173339	0.184491	-0.0373945	0.106812	0.0721749
-6.17647	0	0.155315	-0.00533748	-0.0375324	0.0374816	0.0596451		0.192375	0.195971	-0.0252942	0.121017	0.0731632
-6.02941	0	0.213276	-0.0048783	-0.0326267	0.0585904	0.0777567		0.121432	0.162052	-0.0351075	0.0827921	0.0601047
-5.88235	0	0.29553	0.0537336	-0.0406696	0.102865	0.100113		0.129291	0.176505	-0.0488574	0.0856465	0.0686192
-5.73529	0	0.233218	0.0303894	-0.0505623	0.071015	0.0844011		0.170902	0.163455	-0.0554681	0.0929631	0.0742467
-5.58824	0	0.120458	0.109606	-0.0500411	0.0600076	0.0551135		0.165225	0.182858	-0.0479637	0.10004	0.0741765
-5.44118	0	0.130448	0.129148	-0.0407901	0.0729351	0.0568638		0.165275	0.197703	-0.0437999	0.106393	0.0756775
-5.29412	0	0.10697	0.0650698	-0.0336373	0.0461343	0.0416795		0.0914111	0.21093	-0.0391526	0.0877295	0.0722161
-5.14706	0	0.163008	0.0669105	-0.0392984	0.0635399	0.058425		0.177517	0.141754	-0.0471571	0.0907049	0.0696998
-5	0	0.138413	0.0511031	-0.0461512	0.0477882	0.0533048		0.19057	0.105215	-0.0623391	0.0778152	0.0742828
-4.85294	0	0.0423279	0.061891	-0.0548351	0.0164613	0.0360927		0.207818	0.0846277	-0.0673682	0.0750259	0.0795844
-4.70588	0	0.00656257	-0.0156036	-0.0510289	-0.0200233	0.0167714		0.15892	0.092632	-0.0514218	0.06671	0.0620882
-4.55882	0	0.0608178	-0.000612874	-0.0446781	0.00517561	0.0305912		0.165756	0.0613219	-0.0365295	0.063516	0.058405
-4.41176	0	0.0984956	-0.0372329	-0.0373557	0.007969	0.0452633		0.130628	0.0513386	-0.0328623	0.0497014	0.0472027
-4.26471	0	0.0529822	-0.0877201	-0.0378237	-0.0241872	0.0411855		0.159487	0.0711814	-0.0291013	0.067189	0.0544774
-4.11765	0	0.1186	-0.0900827	-0.041616	-0.00436632	0.0630549		0.25139	0.0770818	-0.0367495	0.0972407	0.0837872
-3.97059	0	0.117945	-0.0912189	-0.0404868	-0.00458682	0.0629921		0.208324	0.121896	-0.030089	0.100044	0.0696858
-3.82353	0	0.127575	-0.10095	-0.0399164	-0.00443022	0.068314		0.242567	0.191137	-0.0172198	0.138828	0.0794238
-3.67647	0	0.144393	-0.136278	-0.0319082	-0.00793111	0.0819048		0.201132	0.169226	-0.00279155	0.122522	0.0633303
-3.52941	0	0.135499	-0.132467	-0.0308628	-0.00927699	0.0781046		0.226538	0.175092	-0.0121932	0.129812	0.0725392
-3.38235	0	0.0986104	-0.0688872	-0.0305832	-0.000286683	0.0506698		0.21291	0.121062	-0.028597	0.101792	0.0703798
-3.23529	0	0.0989799	-0.064453	-0.0384985	-0.00132386	0.0507085		0.171778	0.145237	-0.0383028	0.0929041	0.0660494
-3.08824	0	0.129339	0.0195717	-0.0462598	0.0342168	0.051217		0.102608	0.048341	-0.0425261	0.036141	0.0423384
-2.94118	0	-0.00418606	0.0723938	-0.0415479	0.00888662	0.0335353		0.0335448	0.127688	-0.0375139	0.0412396	0.0478446
-2.79412	0	-0.0518144	0.0968339	-0.038611	0.00213617	0.047502		-0.0479519	0.106688	-0.0387996	0.00664544	0.0500909
-2.64706	0	-0.0199523	0.0619993	-0.0318724	0.00339154	0.0295052		-0.0723329	0.0589685	-0.0450626	-0.0194757	0.0400043
-2.5	0	-0.0247218	0.0481095	-0.0390097	-0.00520734	0.0269756		-0.02367	0.0557252	-0.0589706	-0.00897181	0.0339157
-2.35294	0	-0.0296225	0.0234205	-0.0424698	-0.0162239	0.0201662		-0.00739242	0.0285776	-0.063848	-0.0142209	0.0268985
-2.20588	0	-0.00910088	-0.0166839	-0.0485322	-0.0247723	0.0120799		-0.0159523	0.114698	-0.0574798	0.0137551	0.0518754
-2.05882	0	-0.0576571	-0.00809286	-0.038687	-0.0348123	0.0144385		-0.00361253	0.156111	-0.0464935	0.0353351	0.0616438
-1.91176	0	-0.0925161	-0.0259932	-0.0243639	-0.0476244	0.0224508		0.00829813	0.161184	-0.0419946	0.0424958	0.0610941
-1.76471	0	-0.0916211	-0.0530291	-0.020983	-0.0552111	0.0204206		0.0352208	0.0628875	-0.0435975	0.0181702	0.0318999
-1.61765	0	-0.0907475	-0.0830063	-0.0270053	-0.0669197	0.0200819		0.166762	0.0544547	-0.0511503	0.0566889	0.0629159
-1.47059	0	-0.144952	-0.0327705	-0.0345784	-0.070767	0.0370963		0.190718	0.0658088	-0.0564132	0.0667046	0.0713421
-1.32353	0	-0.144494	0.0273919	-0.0356614	-0.0509213	0.0502025		0.0905176	0.0629066	-0.049251	0.0347244	0.0427376
-1.17647	0	-0.143679	0.0272359	-0.0297957	-0.0487462	0.0502404		0.0510996	0.127273	-0.0367457	0.0472088	0.0473879
-1.02941	0	-0.119345	0.0813032	-0.0234379	-0.0204932	0.0579408		0.00154955	0.112069	-0.0318092	0.0272698	0.0434795
-0.882353	0	-0.0621319	0.0979565	-0.0299538	0.00195697	0.0488903		0.022857	0.0758345	-0.0401267	0.0195216	0.0335166
-0.735294	0	-0.0226019	0.0477397	-0.0395978	-0.00482001	0.0267339		0.087219	0.0665204	-0.0454759	0.0360878	0.0412173
-0.588235	0	0.00671965	0.13655	-0.0452977	0.0326572	0.0540731		0.0256657	0.0808786	-0.0429462	0.0211994	0.0358149
-0.441176	0	-0.00764983	0.116763	-0.0415089	0.0225349	0.0481174		-0.0838522	0.0903384	-0.030659	-0.00805761	0.0515387
-0.294118	0	-0.0276115	0.114231	-0.034063	0.0175187	0.0483918		-0.142913	0.0932872	-0.0160045	-0.0218768	0.0682483
-0.147059	0	0.0308142	0.0883758	-0.0243261	0.0316213	0.0325367		-0.0639882	0.0923937	-0.00738117	0.00700811	0.0457133
0	1	0.0372757	0.0649112	-0.0205833	0.0272012	0.0251889		-0.0238745	-0.00824208	-0.0135212	-0.0152126	0.00459124
0.147059	1	0.0183082	-0.0255116	-0.0192024	-0.00880194	0.0136769		0.0268518	-0.0303366	-0.0222673	-0.00858402	0.0178704
0.294118	1	0.00938053	-0.0728449	-0.0161101	-0.0265248	0.0243009		-0.0139516	-0.0743445	-0.0211857	-0.0364939	0.0190402
0.441177	1	0.0105236	-0.0199724	-0.00992973	-0.0064595	0.00897279		-0.0779829	-0.0987924	-0.0105018	-0.0624257	0.0266479
0.588235	1	0.0118128	-0.0792081	0.000572399	-0.0222743	0.0286512		0.0385636	-0.00947574	0.00149774	0.0101952	0.0145336
0.735294	1	0.208741	-0.0381954	0.00948216	0.0600091	0.0756287		0.189107	0.0052521	0.00523615	0.0665318	0.0612877
0.882353	1	0.279642	0.0835346	0.0194276	0.127535	0.0782729		0.346795	0.0446509	0.00360301	0.131683	0.108207
1.02941	1	0.477874	0.20153	0.037198	0.238867	0.128575		0.381591	0.103376	0.00175199	0.16224	0.113532
1.17647	1	0.747574	0.343561	0.0557946	0.38231	0.200637		0.463017	0.191965	0.0330194	0.229334	0.125528
1.32353	1	0.983208	0.463041	0.0837796	0.51001	0.260703		0.528734	0.315103	0.07373	0.305856	0.13143
1.47059	1	1.09337	0.526372	0.118608	0.57945	0.282639		0.707325	0.517202	0.110224	0.444917	0.176117
1.61765	1	1.34723	0.637087	0.151305	0.711874	0.347254		0.853541	0.611817	0.13154	0.532299	0.212182
1.76471	1	1.68315	0.675503	0.166074	0.841576	0.445745		0.799914	0.689871	0.1405	0.543428	0.203953
1.91176	1	1.75178	0.705618	0.176797	0.878065	0.462763		0.739648	0.76562	0.149335	0.551534	0.201239
2.05882	1	1.90082	0.620738	0.185087	0.902214	0.514896		0.688738	0.794497	0.157932	0.547056	0.196943
2.20588	1	1.94051	0.552553	0.190108	0.89439	0.533421		0.814026	0.87473	0.177031	0.621929	0.223138
2.35294	1	1.87518	0.524598	0.190072	0.863284	0.515082		0.708482	0.872817	0.181246	0.587515	0.2086
2.5	1	1.76723	0.502694	0.179544	0.81649	0.484437		0.722845	0.870302	0.177297	0.590148	0.210769
2.64706	1	1.87198	0.475652	0.168889	0.838841	0.524106		0.709436	0.790349	0.160758	0.553514	0.197762
2.79412	1	1.76619	0.455489	0.145188	0.788955	0.49676		0.687665	0.802593	0.146576	0.545611	0.202257
2.94118	1	1.62304	0.449977	0.133726	0.735581	0.453023		0.78313	0.682402	0.138628	0.53472	0.200169
3.08824	1	1.5619	0.406971	0.132156	0.700342	0.438022		0.884556	0.646402	0.15158	0.560846	0.215873
3.23529	0	1.56782	0.405325	0.130332	0.701159	0.440541		0.825039	0.641903	0.167891	0.544944	0.195799
3.38235	0	1.2984	0.406843	0.125194	0.610144	0.3536		0.796264	0.473919	0.161831	0.477338	0.183153
3.52941	0	1.30741	0.39383	0.114647	0.605295	0.360189		0.788976	0.462425	0.133956	0.461786	0.189088
3.67647	0	1.28077	0.304038	0.104022	0.562944	0.363529		0.744481	0.357587	0.104617	0.402229	0.186057
3.82353	0	1.35532	0.319238	0.0915862	0.588716	0.388897		0.613567	0.342472	0.101528	0.352522	0.147898
3.97059	0	1.22331	0.250096	0.0931781	0.522195	0.353472		0.57576	0.394599	0.103974	0.358111	0.137409
4.11765	0	1.28662	0.230444	0.104132	0.540399	0.374888		0.577206	0.379295	0.111867	0.356123	0.13483
4.26471	0	1.33851	0.305151	0.113704	0.585789	0.380398		0.520104	0.347479	0.0908817	0.319488	0.124694
4.41176	0	1.24335	0.267848	0.106258	0.539153	0.355176		0.60561	0.351011	0.065018	0.340546	0.156143
4.55882	0	1.32148	0.233327	0.0962234	0.550344	0.387595		0.495487	0.471318	0.0535403	0.340115	0.143457
4.70588	0	1.18799	0.164127	0.0993926	0.483837	0.352572		0.625957	0.508232	0.0619569	0.398715	0.171775
4.85294	0	1.13469	0.232829	0.109331	0.492284	0.323177		0.610144	0.570867	0.0793277	0.420113	0.170769
5	0	1.12987	0.212515	0.121848	0.488076	0.321961		0.561281	0.563349	0.0856544	0.403428	0.158888
5.14706	0	1.23912	0.196953	0.130627	0.522234	0.358955		0.574438	0.499903	0.0859964	0.386779	0.151923
5.29412	0	1.11519	0.235169	0.126567	0.49231	0.313016		0.49344	0.597753	0.0730729	0.388089	0.16036
5.44118	0	1.01324	0.126732	0.115691	0.418554	0.29736		0.478701	0.62051	0.0735452	0.390919	0.163882
5.58824	0	1.05404	0.211873	0.124148	0.463355	0.296428		0.439414	0.61031	0.0857389	0.378487	0.154464
5.73529	0	1.06413	0.205053	0.136674	0.468618	0.298409		0.446455	0.541469	0.105513	0.364479	0.132356
5.88235	0	1.10911	0.260722	0.15386	0.507898	0.302186		0.335316	0.46774	0.122856	0.308637	0.100449
6.02941	0	1.06435	0.220824	0.163662	0.482946	0.291171		0.39392	0.414376	0.130293	0.312863	0.0914759
6.17647	0	0.851878	0.204561	0.158594	0.405011	0.223827		0.526828	0.406157	0.12981	0.354265	0.117509
6.32353	0	0.73708	0.189589	0.155648	0.360772	0.188409		0.447727	0.423714	0.13564	0.335694	0.100267
6.47059	0	0.658174	0.161898	0.158896	0.326323	0.165928		0.514643	0.38039	0.158951	0.351328	0.103702
6.61765	0	0.545364	0.233261	0.173436	0.317353	0.115306		0.54442	0.361522	0.186126	0.364023	0.103438
6.76471	0	0.649126	0.132906	0.179041	0.320358	0.164923		0.53084	0.322388	0.19355	0.348926	0.0982671
6.91176	0	0.600431	0.136733	0.176862	0.304675	0.148331		0.565655	0.351292	0.181171	0.366039	0.111236
7.05882	0	0.627715	0.0727938	0.162107	0.287539	0.172031		0.610058	0.379003	0.164117	0.384392	0.12876
7.20588	0	0.696527	0.0760473	0.148766	0.307113	0.195835		0.491425	0.434063	0.153855	0.359781	0.104286
7.35294	0	0.689631	0.107041	0.145774	0.314148	0.188074		0.349268	0.390657	0.158754	0.299559	0.0714095
7.5	0	0.694664	0.157665	0.152162	0.33483	0.179924		0.378239	0.340224	0.164174	0.294212	0.0659388
7.64706	0	0.773341	0.19402	0.155247	0.374203	0.199883		0.318181	0.257017	0.15481	0.243336	0.0476548
7.79412	0	0.815987	0.202533	0.143866	0.387462	0.214931		0.338404	0.247403	0.128892	0.238233	0.0606545
7.94118	0	0.651776	0.233504	0.133781	0.339687	0.158678		0.349442	0.203407	0.117046	0.223298	0.0678201
8.08824	0	0.651285	0.211876	0.126811	0.32999	0.162513		0.242088	0.166054	0.12133	0.17649	0.0352483
8.23529	0	0.601491	0.27593	0.128252	0.335224	0.139792		0.211014	0.196946	0.127993	0.178651	0.0256524
8.38235	0	0.630196	0.268558	0.140456	0.346403	0.146636		0.277192	0.1379	0.133803	0.182965	0.0471285
8.52941	0	0.664739	0.323212	0.151082	0.379677	0.150944		0.289899	0.192323	0.121834	0.201352	0.0487258
8.67647	0	0.679165	0.237703	0.139273	0.352047	0.166009		0.414061	0.196559	0.104322	0.238314	0.0918191
8.82353	0	0.563581	0.140402	0.130074	0.278019	0.142812		0.382268	0.230077	0.0963063	0.236217	0.0826072
8.97059	0	0.519837	0.133945	0.128175	0.260652	0.129603		0.304034	0.220561	0.105209	0.209935	0.0576411
9.11765	0	0.485785	0.150792	0.136043	0.25754	0.114202		0.288739	0.204254	0.122107	0.205033	0.0481042
9.26471	0	0.523042	0.168053	0.145449	0.278848	0.122271		0.284486	0.200516	0.131194	0.205399	0.0443186
9.41176	0	0.431028	0.136394	0.150475	0.239299	0.0959507		0.34245	0.174243	0.131526	0.216073	0.0643803
9.55882	0	0.288035	0.151942	0.137221	0.1924	0.0480064		0.38226	0.175729	0.121669	0.226553	0.0794024
9.70588	0	0.231607	0.063357	0.130061	0.141675	0.0489153		0.372677	0.177096	0.121555	0.223776	0.0761576
9.85294	0	0.256729	0.0674994	0.138047	0.154092	0.0552119		0.263382	0.202596	0.137672	0.201217	0.036296
10	0	0.390832	0.0850098	0.147932	0.207925	0.0932402		0.278306	0.15904	0.153363	0.196903	0.0407346
10.1471	0	0.300608	0.0068131	0.157978	0.155133	0.0848231		0.2361	0.133896	0.165013	0.178336	0.0302465
10.2941	0	0.294696	-0.0338875	0.162104	0.140971	0.0954407		0.212728	0.167051	0.15183	0.177203	0.0182976
10.4412	0	0.266266	-0.0169332	0.153271	0.134202	0.0823068		0.272654	0.145241	0.131087	0.182994	0.0450158
10.5882	0	0.296419	-0.0468017	0.148432	0.132683	0.0993917		0.20184	0.0914502	0.131753	0.141681	0.0322511
10.7353	0	0.388719	-0.0738471	0.161935	0.158935	0.13354		0.142875	0.0757536	0.146666	0.121765	0.0230317
10.8824	0	0.390704	-0.0803251	0.170199	0.160193	0.136066		0.202905	0.0354369	0.166302	0.134881	0.0508325
11.0294	0	0.374011	-0.100151	0.17895	0.150937	0.137594		0.142866	0.0160435	0.168344	0.109085	0.0470983
11.1765	0	0.260132	-0.101575	0.181419	0.113325	0.109826		0.0587746	0.0104166	0.157522	0.0755712	0.0432883
11.3235	0	0.268295	-0.0635196	0.175386	0.12672	0.0988289		0.0475032	0.0803935	0.145687	0.0911944	0.0288531
11.4706	0	0.313357	-0.0844527	0.167517	0.13214	0.116192		0.0206391	0.0549557	0.151788	0.0757944	0.0392671
11.6176	0	0.207651	-0.0661593	0.175253	0.105581	0.0863781		0.0334098	0.0772085	0.180799	0.0971391	0.043699
11.7647	0	0.207419	-0.0370098	0.18364	0.118017	0.0778166		-0.0536594	0.185494	0.194364	0.108733	0.0812366
11.9118	0	0.107956	0.0419271	0.182784	0.110889	0.0406882		-0.0555596	0.232664	0.188704	0.121936	0.0896506
12.0588	0	0.0303577	0.0633558	0.178358	0.0906903	0.0448567		-0.0633256	0.242097	0.17272	0.117164	0.0924403
12.2059	0	0.00118503	0.189622	0.164351	0.118386	0.0590529		-0.103066	0.21158	0.160822	0.0897788	0.0975293
12.3529	0	0.0649398	0.212989	0.157466	0.145132	0.0431809		-0.0348019	0.233041	0.165208	0.121149	0.0803965
12.5	0	0.114988	0.286195	0.163097	0.188093	0.0509792		0.0247315	0.219046	0.17101	0.138263	0.0584347
12.6471	0	0.047591	0.301193	0.174633	0.174472	0.0732087		0.0757051	0.320209	0.175597	0.190504	0.0709745
12.7941	0	0.160097	0.249205	0.178644	0.195982	0.0271445		0.0131328	0.353966	0.160724	0.175941	0.0986839
12.9412	0	0.175023	0.182294	0.171733	0.17635	0.00311997		0.133301	0.31644	0.140278	0.196673	0.0599175
13.0882	0	0.345872	0.0952334	0.161208	0.200771	0.0750084		0.124202	0.263115	0.136057	0.174458	0.0444606
13.2353	0	0.422284	0.0617184	0.159944	0.214649	0.10762		0.176736	0.257609	0.143333	0.192559	0.0339243
13.3824	0	0.433588	-0.00954277	0.16937	0.197805	0.128708		0.282425	0.240527	0.151606	0.224853	0.038569
13.5294	0	0.465484	0.0425208	0.178319	0.228775	0.124678		0.306434	0.257454	0.152927	0.238938	0.0452704
13.6765	0	0.495301	0.0342782	0.175988	0.235189	0.136338		0.25935	0.25596	0.143086	0.219465	0.0382023
13.8235	0	0.519092	0.0753049	0.164338	0.252912	0.135549		0.222703	0.167324	0.133511	0.174512	0.0259971
13.9706	0	0.459923	0.0651915	0.15229	0.225801	0.119731		0.268278	0.125714	0.12282	0.172271	0.0480111
14.1176	0	0.516402	0.109077	0.151595	0.259025	0.129273		0.306536	0.0709384	0.134697	0.170724	0.0703561
14.2647	0	0.470537	0.125226	0.162004	0.252589	0.10949		0.262985	0.117165	0.146028	0.175393	0.0445818
14.4118	0	0.513129	0.113584	0.165345	0.264019	0.125448		0.225157	0.117504	0.139217	0.160626	0.0328689
14.5588	0	0.523347	0.107318	0.162237	0.264301	0.13049		0.176571	0.151202	0.129071	0.152281	0.0137225
14.7059	0	0.412508	0.0282489	0.148589	0.196449	0.113478		0.175568	0.162026	0.112998	0.150197	0.0190063
14.8529	0	0.463966	-0.0209312	0.140478	0.194504	0.14256		0.212172	0.185962	0.111493	0.169876	0.0301558
15	0	0.551196	-0.022582	0.14045	0.223021	0.170703		0.315045	0.206651	0.114196	0.211964	0.0580411
15.1471	0	0.561285	-0.00257576	0.149403	0.236037	0.168438		0.29516	0.235077	0.129383	0.219873	0.0484557
15.2941	0	0.44879	0.0124577	0.15184	0.204363	0.128667		0.224259	0.230237	0.120321	0.191606	0.035684
15.4412	0	0.316924	0.000842748	0.143026	0.153597	0.0913977		0.249844	0.217717	0.0956808	0.187747	0.0469582
15.5882	0	0.363968	0.0532124	0.128953	0.182045	0.0935526		0.237126	0.257455	0.0867499	0.193777	0.0538343
15.7353	0	0.323537	0.0376667	0.117854	0.159686	0.0851328		0.236223	0.253252	0.0809121	0.190129	0.0548293
15.8824	0	0.31708	0.0239376	0.121212	0.154077	0.0862037		0.171318	0.338638	0.0951342	0.201697	0.071916
16.0294	0	0.291472	-0.00120002	0.129775	0.140016	0.0846421		0.160212	0.315254	0.104428	0.193298	0.0630686
16.1765	0	0.248944	-0.00654422	0.132737	0.125045	0.0738533		0.0765315	0.296916	0.0970245	0.156824	0.0702955
16.3235	0	0.293179	0.00727631	0.125076	0.141844	0.0829576		0.165262	0.304713	0.079029	0.183001	0.0657502
16.4706	0	0.316372	-0.0106684	0.1127	0.139468	0.0953523		0.223957	0.375194	0.0684157	0.222522	0.0885622
16.6176	0	0.42482	-0.0305813	0.10327	0.165836	0.135134		0.261457	0.34473	0.0795152	0.228567	0.0783071
16.7647	0	0.304623	-0.0598947	0.112057	0.118929	0.105283		0.272789	0.373244	0.0860898	0.244041	0.0841313
16.9118	0	0.326468	-0.111038	0.124003	0.113144	0.126414		0.293142	0.446493	0.0933875	0.277674	0.102226
17.0588	0	0.362209	-0.0876342	0.120256	0.13161	0.129982		0.376166	0.331178	0.0791162	0.262153	0.0924355
17.2059	0	0.388006	-0.0826334	0.10805	0.137808	0.136674		0.313586	0.295936	0.0637689	0.22443	0.0804922
17.3529	0	0.354025	-0.0866136	0.0949863	0.120799	0.127854		0.337685	0.365948	0.0561595	0.253264	0.0988895
17.5	0	0.37886	-0.0864031	0.089371	0.127276	0.135641		0.357713	0.350768	0.0627616	0.257081	0.0971804
17.6471	0	0.391939	-0.0996209	0.100596	0.130972	0.142712		0.345907	0.282553	0.0693879	0.232616	0.083638
17.7941	0	0.36403	-0.00367814	0.115697	0.158683	0.108302		0.40514	0.338459	0.0636496	0.269083	0.104505
17.9412	0	0.35818	0.0312984	0.113201	0.16756	0.0981988		0.358754	0.309659	0.0583624	0.242258	0.0930337
18.0882	0	0.333507	0.114024	0.0983715	0.181967	0.0759042		0.381612	0.235046	0.0446244	0.220427	0.0975541
18.2353	0	0.375688	0.113483	0.0960944	0.195089	0.0904392		0.36081	0.27597	0.0423401	0.226373	0.0952202
18.3824	0	0.321206	0.125684	0.0993865	0.182092	0.0699699		0.32758	0.24116	0.0547471	0.207829	0.0805039
18.5294	0	0.380802	0.127799	0.109379	0.205994	0.0875656		0.359613	0.199174	0.0759628	0.211583	0.0821175
18.6765	0	0.341214	0.143726	0.12604	0.20366	0.0689663		0.301668	0.315209	0.080737	0.232538	0.0760012
18.8235	0	0.341288	0.176974	0.126879	0.215047	0.0647558		0.228846	0.366565	0.0775106	0.224307	0.0834737
18.9706	0	0.316283	0.0884563	0.112477	0.172405	0.072272		0.137587	0.364748	0.0753917	0.192576	0.0879385
19.1176	0	0.367506	0.0470335	0.111615	0.175385	0.0978527		0.112574	0.301248	0.0867846	0.166869	0.0676009
19.2647	0	0.380344	0.00232727	0.121872	0.168181	0.111554		0.128005	0.244952	0.108836	0.160598	0.0425386
19.4118	0	0.400545	0.0129624	0.1302	0.181236	0.114758		0.033278	0.200193	0.127801	0.120424	0.0483252
19.5588	0	0.387481	0.0106974	0.138055	0.178744	0.110654		0.174523	0.237615	0.123976	0.178705	0.0328716
19.7059	0	0.304637	0.0172092	0.139228	0.153692	0.0832879		0.103109	0.284817	0.108115	0.165347	0.0597522
19.8529	0	0.304234	-0.0223781	0.125972	0.135943	0.0944166		0.0785127	0.165222	0.101844	0.115193	0.0259055
20	0	0.298875	-0.0616285	0.120892	0.11938	0.104071		0.129975	0.196622	0.112999	0.146532	0.02552
20.1471	0	0.26866	-0.0189625	0.130985	0.126894	0.0830547		0.147194	0.154569	0.130574	0.144112	0.0070962
20.2941	0	0.291417	-0.0283761	0.136248	0.133096	0.0923298		0.204817	0.199641	0.12896	0.177806	0.0244688
20.4412	0	0.31164	0.000894694	0.135876	0.14947	0.0899617		0.118092	0.275567	0.12251	0.172056	0.0517709
20.5882	0	0.28318	-0.0171351	0.123072	0.129706	0.086757		0.245719	0.288161	0.101254	0.211711	0.0565714
20.7353	0	0.342309	0.0529516	0.11415	0.169804	0.0880435		0.263129	0.302345	0.092316	0.219263	0.0644753
20.8824	0	0.34457	0.0186508	0.105532	0.156251	0.0974427		0.320271	0.256447	0.0949527	0.22389	0.0670499
21.0294	0	0.348901	0.0414269	0.1062	0.165509	0.093583		0.340755	0.231896	0.101724	0.224792	0.0690938
21.1765	0	0.394693	0.0577644	0.107054	0.186504	0.105063		0.474397	0.194941	0.0975767	0.255638	0.112933
21.3235	0	0.427488	0.0186781	0.102071	0.182746	0.124716		0.476639	0.215474	0.0796184	0.257244	0.116497
21.4706	0	0.480194	0.0525065	0.0849758	0.205892	0.137471		0.505686	0.173317	0.0601946	0.246399	0.133693
21.6176	0	0.433728	0.0407544	0.0748097	0.183097	0.1257		0.534397	0.0990174	0.0505966	0.228004	0.153833
21.7647	0	0.391149	0.0198093	0.0781053	0.163021	0.115298		0.486927	0.172025	0.0595004	0.239484	0.127915
21.9118	0	0.329998	-0.0421522	0.0824435	0.12343	0.109368		0.354957	0.188169	0.0727574	0.205294	0.0819128
22.0588	0	0.382225	-0.0139889	0.0944922	0.154243	0.118214		0.329196	0.301985	0.0760761	0.235752	0.0802236
22.2059	0	0.310146	0.0214939	0.100148	0.143929	0.0861543		0.337111	0.290418	0.0666308	0.231387	0.0834733
22.3529	0	0.313739	0.0157539	0.0962948	0.141929	0.0889957		0.182516	0.308452	0.0633104	0.184759	0.0707752
22.5	0	0.316324	0.0271561	0.0929873	0.145489	0.0875057		0.189003	0.405335	0.0730184	0.222452	0.0973785
22.6471	0	0.1666	0.0223594	0.104861	0.09794	0.0417821		0.20936	0.406608	0.0909651	0.235644	0.092061
22.7941	0	0.210742	0.0343727	0.121575	0.12223	0.0509145		0.234465	0.492393	0.114056	0.280305	0.111596
22.9412	0	0.25141	0.0578538	0.131454	0.146906	0.0564064		0.238969	0.406479	0.118632	0.254693	0.0834653
23.0882	0	0.275446	0.0759242	0.128847	0.160072	0.0596756		0.278963	0.406919	0.106039	0.263974	0.0871793
23.2353	0	0.213657	0.0766388	0.121292	0.137196	0.0403452		0.292758	0.292931	0.0987112	0.228133	0.0647111
23.3824	0	0.308695	0.0606625	0.10949	0.159616	0.0758607		0.231698	0.270906	0.100467	0.201024	0.0515368
23.5294	0	0.269618	0.0593036	0.110401	0.146441	0.0633303		0.240795	0.227092	0.0991598	0.189016	0.0451018
23.6765	0	0.336092	0.0827884	0.117558	0.178813	0.0792776		0.151702	0.18749	0.103279	0.14749	0.0244007
23.8235	0	0.408083	0.0611745	0.117136	0.195465	0.10753		0.116296	0.289595	0.103918	0.169936	0.0599357
23.9706	0	0.407458	0.12003	0.106267	0.211252	0.0981837		0.143847	0.209247	0.081636	0.14491	0.036842
24.1176	0	0.3727	0.188601	0.092159	0.21782	0.0822924		0.181084	0.275472	0.0679912	0.174849	0.0599756
24.2647	0	0.446602	0.188913	0.0863089	0.240608	0.107171		0.211363	0.2445	0.0743082	0.176724	0.0520934
24.4118	0	0.528441	0.154356	0.0863737	0.25639	0.137434		0.21354	0.191918	0.0852876	0.163582	0.0396416
24.5588	0	0.546729	0.172995	0.0948332	0.271519	0.139443		0.237131	0.237717	0.0918598	0.188903	0.0485217
24.7059	0	0.499452	0.198864	0.0972292	0.265182	0.120754		0.288972	0.264666	0.0900845	0.214574	0.0626391
24.8529	0	0.425441	0.177013	0.0855302	0.229328	0.101551		0.345384	0.191044	0.0726126	0.203014	0.0789695
25	0	0.46568	0.213534	0.0753958	0.251537	0.114257		0.306107	0.08024	0.0590528	0.148467	0.0790571
25.1471	0	0.444427	0.139858	0.0696546	0.21798	0.115023		0.219514	0.157359	0.0661986	0.14769	0.0445214
25.2941	0	0.413164	0.0916978	0.0721568	0.19234	0.110556		0.234056	0.0715457	0.0774908	0.127697	0.0532068
25.4412	0	0.362254	0.0516533	0.0732364	0.162381	0.100131		0.212474	0.0899391	0.0798835	0.127432	0.0426197
25.5882	0	0.304513	0.0755465	0.0726479	0.150902	0.0768097		0.183688	0.197518	0.06594	0.149049	0.0417458
25.7353	0	0.267146	0.0101282	0.0636629	0.113646	0.0782905		0.284836	0.238299	0.0560001	0.193045	0.0698269
25.8824	0	0.321467	0.00113379	0.051599	0.124733	0.0994399		0.240808	0.19218	0.0565358	0.163174	0.0551362
26.0294	0	0.323695	-0.0192485	0.0545168	0.119654	0.104219		0.233369	0.147683	0.0668678	0.149306	0.0480715
26.1765	0	0.311414	-0.0518651	0.0643374	0.107962	0.107114		0.172002	0.217865	0.0810445	0.156971	0.0402054
26.3235	0	0.385388	-0.0253031	0.066802	0.142296	0.12442		0.19453	0.19714	0.0804267	0.157365	0.0384768
26.4706	0	0.374672	0.00691626	0.0719684	0.151185	0.11331		0.191608	0.226912	0.0732553	0.163925	0.0464664
26.6176	0	0.478886	0.0172478	0.0669458	0.187693	0.146302		0.168474	0.282901	0.0607624	0.170712	0.0641355
26.7647	0	0.484739	0.0435979	0.0622372	0.196858	0.144041		0.144201	0.227123	0.0658286	0.145718	0.0465679
26.9118	0	0.546086	0.0472389	0.0627777	0.218701	0.163754		0.0446691	0.196326	0.0781886	0.106394	0.0459949
27.0588	0	0.606556	0.0795481	0.0739637	0.253356	0.176607		0.0676474	0.161653	0.0848996	0.104733	0.0288921
27.2059	0	0.746504	0.121908	0.0822803	0.316897	0.215107		0.0864501	0.235871	0.0827698	0.13503	0.0504315
27.3529	0	0.658463	0.153716	0.0827411	0.298307	0.18124		0.181062	0.274629	0.0738032	0.176498	0.0580182
27.5	0	0.648149	0.136706	0.0794074	0.288088	0.180789		0.161653	0.30169	0.0636462	0.175663	0.0690734
27.6471	0	0.698899	0.132649	0.072969	0.301506	0.199442		0.0978767	0.275569	0.0615324	0.144993	0.0661259
27.7941	0	0.603928	0.11191	0.0786464	0.264828	0.169822		0.147048	0.202538	0.0693	0.139629	0.038641
27.9412	0	0.665169	0.0885299	0.0850926	0.279597	0.192788		0.175531	0.186467	0.0761681	0.146056	0.035086
28.0882	0	0.654159	0.0956934	0.0898006	0.279884	0.187145		0.18666	0.230702	0.0665399	0.1613	0.0490564
28.2353	0	0.598062	0.0509502	0.076409	0.241807	0.178279		0.219478	0.321578	0.0578924	0.19965	0.0767625
28.3824	0	0.554428	0.0143219	0.0621029	0.210284	0.172624		0.291395	0.326253	0.0527801	0.223476	0.0859391
28.5294	0	0.622621	0.0245803	0.054407	0.233869	0.194566		0.297678	0.258728	0.0496097	0.202005	0.0770228
28.6765	0	0.634186	0.0382969	0.0619322	0.244805	0.19481		0.381104	0.253637	0.0580426	0.230928	0.0939484
28.8235	0	0.770428	0.000655821	0.0634362	0.278173	0.246794		0.463744	0.23521	0.0644516	0.254468	0.115667
28.9706	0	0.82143	0.0223616	0.0625051	0.302099	0.259924		0.444215	0.189248	0.0621571	0.231873	0.112331
29.1176	0	0.915062	0.0132737	0.05216	0.326832	0.294329		0.428121	0.326581	0.0436569	0.26612	0.115029
29.2647	0	0.829358	0.00335377	0.0376922	0.290135	0.269794		0.475573	0.246937	0.0415028	0.254671	0.125365
29.4118	0	0.763598	-0.0119675	0.0401401	0.263924	0.25029		0.353513	0.210495	0.0446374	0.202882	0.0892458
29.5588	0	0.752174	-0.0110999	0.0484184	0.263164	0.245108		0.315227	0.142751	0.0553563	0.171111	0.0763468
29.7059	0	0.738743	-0.0724251	0.048336	0.238218	0.252679		0.280508	0.122186	0.0583403	0.153678	0.066039
29.8529	0	0.713898	-0.109573	0.0382019	0.214176	0.253477		0.254278	0.0558881	0.0476784	0.119281	0.0675397
30	0	0.597013	-0.0738327	0.0283268	0.183836	0.208683		0.215807	0.156082	0.039006	0.136965	0.0519255
30.1471	0	0.477187	-0.0633336	0.0216902	0.145181	0.167808		0.287297	0.192499	0.0335837	0.171127	0.0740163
30.2941	0	0.411019	-0.100084	0.0223512	0.111095	0.154071		0.399692	0.0397379	0.0463095	0.161913	0.118904
30.4412	0	0.467738	-0.0735108	0.0299727	0.1414	0.165881		0.354471	0.126893	0.049622	0.176995	0.0914984
30.5882	0	0.578629	-0.0320888	0.0323316	0.192957	0.193731		0.397274	0.157181	0.0462142	0.200223	0.103602
30.7353	0	0.482583	0.0123239	0.0256391	0.173515	0.154582		0.358515	0.209551	0.0334349	0.2005	0.0939516
30.8824	0	0.505333	0.0955836	0.0170804	0.205999	0.151373		0.47159	0.296314	0.0301171	0.266007	0.12834
31.0294	0	0.632978	0.129586	0.0144071	0.25899	0.189927		0.482903	0.363836	0.0305055	0.292415	0.13539
31.1765	0	0.633323	0.121429	0.0212917	0.258681	0.189538		0.480863	0.331223	0.0376006	0.283229	0.13019
31.3235	0	0.732419	0.072231	0.0300914	0.278247	0.227412		0.429321	0.331697	0.0476061	0.269541	0.11449
31.4706	0	0.735904	0.087237	0.0320166	0.285052	0.225989		0.353722	0.307999	0.0434921	0.235071	0.0966945
31.6176	0	0.784009	0.119206	0.0313728	0.311529	0.237597		0.443346	0.237363	0.0389202	0.239876	0.116755
31.7647	0	0.79056	0.138879	0.0230689	0.317503	0.23888		0.499455	0.30206	0.0313657	0.277627	0.135677
31.9118	0	0.918903	0.103305	0.0187059	0.346971	0.287007		0.551081	0.303397	0.0322778	0.295585	0.149816
32.0588	0	0.821653	0.025327	0.0240193	0.290333	0.26566		0.548315	0.209292	0.0394297	0.265679	0.149583
32.2059	0	0.728818	-0.00876361	0.0343099	0.251455	0.239005		0.56511	0.166067	0.0515757	0.260918	0.155646
32.3529	0	0.749864	-0.0355278	0.0296343	0.24799	0.251641		0.531608	0.234251	0.0453138	0.270391	0.141539
32.5	0	0.72996	0.0144083	0.019306	0.254558	0.237705		0.527476	0.219051	0.0336027	0.260043	0.144035
32.6471	0	0.71596	0.0606408	0.0102493	0.262284	0.227304		0.496323	0.237053	0.0238584	0.252412	0.136605
32.7941	0	0.648965	0.0370247	0.00677481	0.230921	0.209204		0.491491	0.257919	0.0261847	0.258532	0.134323
32.9412	0	0.544433	-0.0226771	0.012736	0.178164	0.18342		0.4137	0.116267	0.0323785	0.187449	0.115689
33.0882	0	0.589926	-0.0352036	0.0210254	0.191916	0.199666		0.358066	0.0868593	0.0329138	0.15928	0.100606
33.2353	0	0.734321	-0.0093889	0.0241166	0.249683	0.242512		0.299889	0.0366618	0.0261449	0.120898	0.0895465
33.3824	0	0.662139	-0.0238636	0.0157294	0.218002	0.222363		0.219326	0.0676952	0.0135855	0.100202	0.0615759
33.5294	0	0.717861	0.0463314	0.0137467	0.259313	0.229467		0.271539	-0.0704025	0.00571355	0.0689499	0.10365
33.6765	0	0.701321	0.0206097	0.0105311	0.244154	0.228602		0.229319	-0.0526781	0.014967	0.0638692	0.0849983
33.8235	0	0.616567	0.0139002	0.0191704	0.216546	0.200016		0.216096	0.0581257	0.028747	0.100989	0.0581747
33.9706	0	0.685399	-0.0144287	0.0234582	0.231476	0.227225		0.0809242	-0.0132422	0.0294666	0.0323829	0.0272226
34.1176	0	0.695075	0.0179772	0.0243809	0.245811	0.22464		0.174903	-0.0110451	0.0188027	0.060887	0.0576556
34.2647	0	0.489035	-0.00736071	0.0182328	0.166636	0.161369		0.190248	0.0609461	0.0145487	0.0885809	0.0525685
34.4118	0	0.52456	0.00760146	0.0103971	0.180853	0.171856		0.175387	0.115431	0.00782498	0.0995477	0.0490187
34.5588	0	0.572204	0.0473233	0.0121352	0.210554	0.18111		0.159777	0.107127	0.0101887	0.0923641	0.0438086
34.7059	0	0.504864	0.0150106	0.017095	0.17899	0.162938		0.109083	0.138856	0.0168709	0.0882698	0.0367195
34.8529	0	0.491859	-0.00533349	0.0304225	0.172316	0.160104		0.0752931	0.131597	0.0058291	0.0709063	0.0363722
35	0	0.528948	0.00902322	0.0287242	0.188898	0.17012		0.0766459	0.0606237	-0.00817544	0.0430314	0.0260178
35.1471	0	0.441183	0.0882011	0.0227966	0.18406	0.12994		0.130226	0.151371	-0.0199804	0.0872055	0.0539395
35.2941	0	0.510314	0.0844147	0.0187951	0.204508	0.154072		0.0650884	0.185164	-0.0189942	0.0770861	0.05924
35.4412	0	0.554334	0.155256	0.0234735	0.244354	0.15959		0.0420944	0.143742	-0.013672	0.0573881	0.0460804
35.5882	0	0.545354	0.118649	0.0290469	0.231017	0.159283		0.0789554	0.166461	-0.00801649	0.0791334	0.0503675
35.7353	0	0.471743	0.0899478	0.0275532	0.196415	0.138838		0.179925	0.136988	-0.0165415	0.100124	0.059635
35.8824	0	0.513775	0.0312463	0.0256594	0.190227	0.161782		0.178598	0.189986	-0.0189087	0.116558	0.0678133
36.0294	0	0.476639	0.046932	0.0157534	0.179775	0.148705		0.23101	0.269769	-0.0163211	0.161486	0.0896048
36.1765	0	0.55477	0.0170998	0.0147713	0.195547	0.179613		0.267394	0.284291	-0.010929	0.180252	0.0957149
36.3235	0	0.541631	0.0262778	0.021749	0.196553	0.172544		0.260212	0.271393	0.00175519	0.177787	0.088075
36.4706	0	0.621046	0.00242951	0.0301064	0.217861	0.201751		0.310342	0.218302	0.0118947	0.18018	0.0882377
36.6176	0	0.643079	0.0749185	0.0298064	0.249268	0.197336		0.262095	0.298097	0.000818273	0.187003	0.0936709
36.7647	0	0.566763	0.12548	0.0235123	0.238585	0.166708		0.264458	0.277391	-0.00850525	0.177781	0.0932179
36.9118	0	0.61552	0.211142	0.0213248	0.282662	0.175217		0.21941	0.342221	-0.0106593	0.183657	0.103424
37.0588	0	0.632425	0.235025	0.0246619	0.297371	0.178194		0.213645	0.308534	-0.00599572	0.172061	0.093147
37.2059	0	0.762351	0.228721	0.0306605	0.340578	0.2185		0.23266	0.333935	0.00248294	0.189693	0.0980642
37.3529	0	0.664046	0.261298	0.0365599	0.320635	0.183553		0.234792	0.328284	0.00183425	0.188303	0.0970623
37.5	0	0.649466	0.215057	0.037385	0.300636	0.1818		0.214486	0.278746	-0.010976	0.160752	0.0878448
37.6471	0	0.595506	0.266133	0.0277074	0.296449	0.164609		0.216912	0.374943	-0.0210777	0.190259	0.115095
37.7941	0	0.622481	0.138127	0.0203789	0.260329	0.184239		0.273985	0.31726	-0.0158243	0.191807	0.104564
37.9412	0	0.561921	0.080849	0.0274269	0.223399	0.169962		0.256433	0.308022	-0.00727653	0.185726	0.0976436
38.0882	0	0.647722	0.0687999	0.0325253	0.249682	0.199295		0.270133	0.294723	0.00215323	0.189003	0.0936941
38.2353	0	0.542119	0.0794085	0.0318845	0.217804	0.162737		0.302181	0.333024	-0.00335009	0.210618	0.107354
38.3824	0	0.405121	0.139651	0.0285924	0.191122	0.111699		0.304384	0.223383	-0.016923	0.170281	0.0964786
38.5294	0	0.443707	0.136483	0.0218345	0.200675	0.125943		0.270747	0.215102	-0.0248364	0.153671	0.0906875
38.6765	0	0.51901	0.0962739	0.0173929	0.210892	0.155733		0.343922	0.224126	-0.0207034	0.182448	0.107301
38.8235	0	0.482756	0.0835902	0.0268418	0.197729	0.143452		0.278377	0.229396	-0.0134438	0.164776	0.0902249
38.9706	0	0.544708	0.0914412	0.0372243	0.224458	0.160888		0.2844	0.207281	-0.00917268	0.160836	0.0878713
39.1176	0	0.545745	0.127174	0.0394758	0.237465	0.156205		0.312717	0.218316	-0.0120068	0.173009	0.0964383
39.2647	0	0.455871	0.0494666	0.0392798	0.181539	0.137197		0.295183	0.150373	-0.0151102	0.143482	0.0896403
39.4118	0	0.452222	0.0262347	0.0400869	0.172848	0.139744		0.334759	0.0671432	-0.018247	0.127885	0.106333
39.5588	0	0.53313	-0.0234513	0.0473349	0.185671	0.174927		0.395104	0.123618	-0.0126548	0.168689	0.119847
39.7059	0	0.499467	-0.0651621	0.0502819	0.161529	0.172224		0.446466	0.13396	-0.00448532	0.19198	0.133372
39.8529	0	0.437737	-0.0464689	0.0593338	0.150201	0.146977		0.383722	0.169898	0.00052576	0.184716	0.110867
40	0	0.507741	-0.0335429	0.0648089	0.179669	0.166475		0.466379	0.117043	0.00741988	0.196947	0.138383
40.1471	0	0.525778	0.0248935	0.062418	0.204363	0.161072		0.501479	0.072277	0.00323828	0.192331	0.155853
40.2941	0	0.660128	0.0438072	0.056	0.253312	0.203439		0.418293	0.125592	0.00667844	0.183521	0.122302
40.4412	0	0.688948	0.159401	0.0602647	0.302871	0.195148		0.412835	0.182532	0.0166769	0.204015	0.114864
40.5882	0	0.823026	0.148395	0.0659817	0.345801	0.239795		0.369732	0.287344	0.035993	0.231023	0.100373
40.7353	0	0.90409	0.159801	0.068202	0.377364	0.264687		0.26858	0.230541	0.0501226	0.183081	0.0673801
40.8824	0	0.983991	0.160968	0.0721845	0.405714	0.290272		0.230648	0.242317	0.056163	0.176376	0.0602008
41.0294	0	1.01251	0.126707	0.0662697	0.40183	0.30584		0.272902	0.208142	0.0541425	0.178395	0.0648781
41.1765	0	0.989347	0.106443	0.0560847	0.383958	0.303043		0.248648	0.243792	0.0413368	0.177926	0.0683088
41.3235	0	0.846259	0.0350686	0.0562995	0.312542	0.266929		0.275596	0.252177	0.0518701	0.193214	0.0709947
41.4706	0	0.80633	0.00480245	0.0636588	0.291597	0.257927		0.396513	0.199084	0.0653381	0.220312	0.0961895
41.6176	0	0.765013	-0.0429898	0.0644492	0.262158	0.253334		0.391679	0.179728	0.0638713	0.211759	0.0959757
41.7647	0	0.594254	0.0131056	0.0603705	0.222577	0.186339		0.342661	0.0823475	0.0527801	0.159263	0.0920956
41.9118	0	0.44119	0.158101	0.0527864	0.217359	0.115971		0.44456	0.200043	0.0380395	0.227547	0.118155
42.0588	0	0.382719	0.169599	0.0483351	0.200218	0.0977347		0.468462	0.171976	0.0433244	0.227921	0.125874
42.2059	0	0.341544	0.170531	0.0515119	0.187862	0.0841723		0.430128	0.184212	0.0506441	0.221661	0.111136
42.3529	0	0.391502	0.174776	0.0605526	0.208944	0.0970524		0.42414	0.130844	0.0683894	0.207791	0.109667
42.5	0	0.466967	0.233745	0.0645526	0.255088	0.116656		0.369264	0.140942	0.0698522	0.193353	0.090318
42.6471	0	0.512441	0.232767	0.0621355	0.269115	0.131256		0.261058	0.164839	0.0569538	0.16095	0.0589518
42.7941	0	0.530504	0.187962	0.0558032	0.25809	0.141449		0.33591	0.184909	0.052666	0.191162	0.0818252
42.9412	0	0.62289	0.146478	0.0517467	0.273705	0.176721		0.406399	0.234017	0.0534184	0.231278	0.101906
43.0882	0	0.654709	0.0435791	0.059312	0.252533	0.201139		0.366509	0.204308	0.0590712	0.209963	0.0887946
43.2353	0	0.655516	0.10215	0.0623849	0.27335	0.191427		0.413644	0.212971	0.0562387	0.227618	0.103434
43.3824	0	0.86003	0.211133	0.0655373	0.3789	0.244209		0.47702	0.226011	0.0560534	0.253028	0.122271
43.5294	0	0.75542	0.185355	0.0601159	0.33363	0.213971		0.485081	0.204823	0.0469645	0.245623	0.128108
43.6765	0	0.728812	0.122468	0.0527469	0.301342	0.21468		0.47316	0.26529	0.0417489	0.260066	0.124565
43.8235	0	0.638271	0.0975609	0.0532177	0.263017	0.188063		0.49605	0.267514	0.0416397	0.268401	0.131178
43.9706	0	0.69656	0.139828	0.054659	0.297015	0.201279		0.384672	0.293879	0.0469634	0.241838	0.100901
44.1176	0	0.647836	0.225877	0.0597847	0.311166	0.17503		0.392587	0.330896	0.0578843	0.260456	0.102839
44.2647	0	0.633567	0.226841	0.0552636	0.305224	0.17148		0.400517	0.247263	0.0625611	0.23678	0.0977001
44.4118	0	0.625857	0.181076	0.0538792	0.286937	0.173392		0.358251	0.234852	0.0575454	0.216883	0.08727
44.5588	0	0.472212	0.105271	0.0497142	0.209066	0.132547		0.265206	0.228655	0.054155	0.182672	0.0651191
44.7059	0	0.486259	0.119845	0.0515637	0.219223	0.134965		0.255795	0.337499	0.0580469	0.217114	0.0829569
44.8529	0	0.49879	0.210756	0.0620209	0.257189	0.128204		0.292016	0.341806	0.0685345	0.234119	0.0840305
45	0	0.525213	0.285027	0.0761537	0.295464	0.129737		0.290625	0.273576	0.0800998	0.214767	0.0675132
45.1471	0	0.40859	0.296235	0.0862236	0.263683	0.0944719		0.32035	0.238379	0.0880364	0.215588	0.0680244
45.2941	0	0.44045	0.206177	0.0916129	0.24608	0.102658		0.243338	0.190911	0.0920324	0.175427	0.0443589
45.4412	0	0.445431	0.164072	0.0908558	0.233453	0.108076		0.196043	0.220445	0.0902688	0.168919	0.0399509
45.5882	0	0.443387	0.127128	0.0940641	0.221526	0.11134		0.133562	0.21625	0.10023	0.150014	0.0344875
45.7353	0	0.496506	0.153359	0.0996999	0.249855	0.124295		0.191572	0.187056	0.109254	0.162627	0.0267185
45.8824	0	0.49454	0.157402	0.10265	0.251531	0.122528		0.116934	0.108173	0.115022	0.113376	0.00265957
46.0294	0	0.588117	0.113578	0.10272	0.268138	0.16002		0.139134	0.102211	0.108854	0.116733	0.0113634
46.1765	0	0.539774	0.055462	0.0943919	0.229876	0.155356		0.177793	0.105199	0.0983885	0.127127	0.0254093
46.3235	0	0.599569	0.0030892	0.0840862	0.228915	0.186796		0.150853	0.0690739	0.0894026	0.10311	0.0245822
46.4706	0	0.511554	-0.00186566	0.0812276	0.196972	0.15911		0.170264	0.0903588	0.0793925	0.113339	0.0286384
46.6176	0	0.580148	0.0208553	0.0876474	0.22955	0.176356		0.232774	0.0868772	0.0802458	0.133299	0.0497745
46.7647	0	0.682356	0.043188	0.0897249	0.271756	0.205739		0.319429	0.0324239	0.082997	0.14495	0.0884526
46.9118	0	0.545885	0.0260792	0.0873075	0.219757	0.164019		0.294914	0.226473	0.0739729	0.198453	0.0653007
47.0588	0	0.544691	-0.0309644	0.0816061	0.198444	0.176147		0.294897	0.294631	0.0602459	0.216591	0.0781727
47.2059	0	0.447673	-0.00779713	0.0728297	0.170902	0.140329		0.233123	0.312048	0.0510211	0.198731	0.0772892
47.3529	0	0.502745	-0.00365046	0.0728323	0.190642	0.157606		0.158636	0.42539	0.0620297	0.215352	0.108659
47.5	0	0.51786	-0.0393591	0.081497	0.186666	0.169232		0.124398	0.507555	0.0726653	0.234873	0.137157
47.6471	0	0.795356	-0.0202819	0.0860783	0.287051	0.256		0.183121	0.528227	0.0765065	0.262618	0.136324
47.7941	0	0.898406	-0.00982867	0.0833079	0.323962	0.288478		0.117472	0.52432	0.0751006	0.238964	0.143201
47.9412	0	0.833601	0.0199249	0.0833084	0.312278	0.261303		0.0906599	0.572885	0.0730458	0.24553	0.163756
48.0882	0	0.991266	0.0492225	0.0847966	0.375095	0.308257		0.076086	0.440583	0.0804676	0.199045	0.120775
48.2353	0	1.01616	0.131421	0.0945034	0.414028	0.301254		0.0980585	0.375165	0.100734	0.191319	0.0919261
48.3824	0	0.958019	0.0856663	0.104401	0.382695	0.287713		0.186287	0.330618	0.129078	0.215328	0.0599643
48.5294	0	0.925008	0.0706903	0.114684	0.370127	0.277731		0.267197	0.305063	0.144296	0.238852	0.0485252
48.6765	0	0.915848	0.0941214	0.12169	0.37722	0.269432		0.406684	0.226535	0.153326	0.262182	0.0752787
48.8235	0	0.718947	0.0688311	0.128189	0.305322	0.207521		0.455879	0.163642	0.158456	0.259326	0.0982881
48.9706	0	0.533658	0.0184673	0.128512	0.226879	0.156644		0.443791	0.129017	0.166195	0.246334	0.09931
49.1176	0	0.528503	-0.00132909	0.124353	0.217176	0.159836		0.446345	0.0953705	0.169806	0.237174	0.10677
49.2647	0	0.499532	-0.00196078	0.124576	0.207383	0.150573		0.470612	0.0773683	0.172077	0.240019	0.118494
49.4118	0	0.503121	0.0451254	0.122535	0.223594	0.141539		0.597888	0.174983	0.162677	0.311849	0.143063
49.5588	0	0.801197	0.0164322	0.12161	0.31308	0.24594		0.486385	0.126227	0.144618	0.25241	0.117108
49.7059	0	0.802642	0.118938	0.107859	0.343147	0.22977		0.442596	0.121253	0.122553	0.228801	0.106898
49.8529	0	0.933046	0.167164	0.0952485	0.398486	0.268085		0.429365	0.0988017	0.105026	0.211064	0.109165
50	0	1.00725	0.225158	0.0842036	0.43887	0.287088		0.350441	0.113648	0.102445	0.188844	0.0808629
50.1471	0	1.16482	0.273293	0.081577	0.506563	0.333749		0.357746	0.121107	0.101705	0.193519	0.0823043
50.2941	0	1.07389	0.328871	0.0837077	0.495491	0.297735		0.281968	0.169668	0.0950353	0.182224	0.0543267
50.4412	0	1.13186	0.272642	0.0811083	0.495202	0.323093		0.264333	0.116583	0.0888723	0.156596	0.054459
50.5882	0	1.10505	0.240575	0.0749716	0.473532	0.319357		0.25878	0.0677557	0.076108	0.134215	0.0623293
50.7353	0	0.903396	0.377657	0.0677977	0.449617	0.243885		0.352102	0.168343	0.0682327	0.196226	0.0831235
50.8824	0	0.835676	0.312835	0.066611	0.405041	0.226746		0.425814	0.117594	0.074646	0.206018	0.110595
51.0294	0	0.704567	0.250564	0.0690248	0.341385	0.189002		0.353439	0.132148	0.0752216	0.186936	0.0848579
51.1765	0	0.587347	0.207504	0.0687229	0.287858	0.155011		0.361819	0.138753	0.0726528	0.191075	0.0874785
51.3235	0	0.601261	0.144951	0.0726383	0.27295	0.165478		0.408921	0.182054	0.0668614	0.219279	0.100483
51.4706	0	0.597352	0.0750185	0.062914	0.245095	0.176163		0.431728	0.161517	0.0560892	0.216445	0.111862
51.6176	0	0.432302	0.0886123	0.0534224	0.191446	0.120856		0.40928	0.184841	0.0465484	0.213556	0.105691
51.7647	0	0.359943	0.0456436	0.0453489	0.150312	0.104816		0.290966	0.137909	0.0469062	0.158594	0.0712092
51.9118	0	0.267106	-0.0477024	0.0387846	0.0860626	0.0939015		0.208674	0.0553578	0.0438714	0.102634	0.0531233
52.0588	0	0.263707	-0.0569499	0.0322476	0.0796682	0.095554		0.103077	0.0544705	0.029443	0.0623302	0.0216165
52.2059	0	0.20803	-0.0314716	0.0220822	0.0662135	0.0725739		0.10301	0.0635865	0.0206589	0.0624185	0.0237799
52.3529	0	0.198416	-0.0277328	0.0118297	0.0608376	0.0697308		0.0505559	0.0379051	0.00915495	0.0325387	0.0122489
52.5		0	0	0				0	0	0
52.6471		0	0	0				0	0	0
52.7941		0	0	0				0	0	0
52.9412		0	0	0				0	0	0
53.0882		0	0	0				0	0	0
53.2353		0	0	0				0	0	0
53.3824		0	0	0				0	0	0

## Sheet: gamma4
time	stimulus	2P_fly1	2P_fly2	2P_fly3	2P average	sem		3P_fly1	3P_fly2	3P_fly3	3P average	sem
-47.9412	0	0.224669	0.00926761	0.0326798	0.0888722	0.068234		0.190348	0.0572331	0.0566734	0.101418	0.0444651
-47.7941	0	0.265982	0.0139081	0.0240117	0.101301	0.0823923		0.165484	0.114379	0.0436161	0.107826	0.0353325
-47.6471	0	0.423539	0.0910375	0.0196149	0.178064	0.124457		0.689295	0.290265	0.0417157	0.340425	0.188615
-47.5	0	0.64189	0.199034	0.0124538	0.284459	0.186655		1.44341	0.424175	0.0493633	0.638982	0.416512
-47.3529	0	0.224669	0.00926761	0.0326798	0.0888722	0.068234		0.190348	0.0572331	0.0566734	0.101418	0.0444651
-47.2059	0	0.265982	0.0139081	0.0240117	0.101301	0.0823923		0.165484	0.114379	0.0436161	0.107826	0.0353325
-47.0588	0	0.423539	0.0910375	0.0196149	0.178064	0.124457		0.689295	0.290265	0.0417157	0.340425	0.188615
-46.9118	0	0.64189	0.199034	0.0124538	0.284459	0.186655		1.44341	0.424175	0.0493633	0.638982	0.416512
-46.7647	0	0.818679	0.275225	0.0093204	0.367741	0.238177		2.09304	0.62936	0.0552919	0.925899	0.606646
-46.6176	0	0.714039	0.379917	0.0116902	0.368549	0.20283		1.96507	0.903344	0.0652098	0.977874	0.549707
-46.4706	0	0.738992	0.353609	0.00963488	0.367412	0.21066		2.00524	0.951832	0.0765649	1.01121	0.557552
-46.3235	0	0.787014	0.345937	0.00393896	0.378963	0.226657		1.95994	0.968183	0.0736303	1.00058	0.544772
-46.1765	0	0.702453	0.365577	-0.0024179	0.355204	0.203545		1.97309	0.950014	0.0782846	1.00046	0.547565
-46.0294	0	0.677305	0.381424	-0.00410522	0.351541	0.197273		1.98956	0.903586	0.0775504	0.990233	0.553648
-45.8824	0	0.491004	0.294683	-0.00856461	0.259041	0.14531		1.45435	0.71054	0.0663778	0.743757	0.401018
-45.7353	0	0.246797	0.170814	-0.00285505	0.138252	0.0738845		0.701007	0.610987	0.0577842	0.456593	0.201091
-45.5882	0	0.160748	0.0887612	0.000251328	0.0832535	0.0464131		0.0764449	0.368672	0.0479697	0.164362	0.102485
-45.4412	0	0.270935	-0.0270078	-0.00160891	0.0807727	0.0953633		0.154288	0.126865	0.0407394	0.107298	0.0342076
-45.2941	0	0.191269	-0.00660167	-0.00646737	0.0594001	0.0659346		0.109366	0.0870995	0.031171	0.075879	0.0232598
-45.1471	0	0.134572	-0.000135273	-0.00725754	0.0423929	0.0461352		0.0880958	0.111244	0.0175561	0.0722986	0.0281752
-45	0	0.201259	-0.014072	-0.00840866	0.0595929	0.0708521		0.110312	0.0863555	0.0158304	0.0708328	0.0283574
-44.8529	0	0.284943	-0.0300129	-0.000939838	0.0846633	0.100491		0.101909	0.0583018	0.0212992	0.0605032	0.023296
-44.7059	0	0.258559	-0.0278412	0.00258364	0.0777673	0.0908217		0.0945477	0.0950279	0.0203547	0.0699768	0.0248114
-44.5588	0	0.223516	-0.013446	-0.000986947	0.0696945	0.076995		0.081185	0.104012	0.0156492	0.0669486	0.0264826
-44.4118	0	0.125659	-0.0258749	-0.00354624	0.0320794	0.0472319		0.0554369	0.151012	0.00655914	0.0710026	0.0424199
-44.2647	0	0.116541	-0.0414166	-0.00634353	0.0229271	0.0478897		0.0609615	0.159665	-0.00163441	0.0729975	0.0469505
-44.1176	0	0.166399	-0.040549	-0.00250102	0.0411164	0.063597		0.0783068	0.108939	0.000966944	0.0627375	0.0321262
-43.9706	0	0.141864	-0.053464	0.00350343	0.0306346	0.0579954		0.0957252	0.0817811	0.0154083	0.0643049	0.0247774
-43.8235	0	0.138233	-0.0579869	0.00446499	0.028237	0.0578774		0.102871	0.130983	0.011804	0.0818863	0.0359686
-43.6765	0	0.102187	-0.0532645	0.0040235	0.0176485	0.045389		0.0642093	0.145254	0.0141469	0.0745366	0.0381979
-43.5294	0	0.113345	-0.0507567	-0.000754252	0.0206115	0.0485618		0.064923	0.144715	0.0107234	0.0734537	0.0389144
-43.3824	0	0.159189	-0.073083	-0.00375449	0.0274507	0.0688427		0.0392708	0.106548	0.0119886	0.0526026	0.0280991
-43.2353	0	0.174334	-0.0688396	-0.0033672	0.0340425	0.0726476		0.071067	0.0413649	0.0165388	0.0429902	0.0157619
-43.0882	0	0.131025	-0.0604077	0.00053998	0.0237192	0.0564641		0.0979436	0.0545958	0.0247471	0.0590955	0.0212495
-42.9412	0	0.117681	-0.0457983	0.00293052	0.0249376	0.0484582		0.0359571	0.0896348	0.0231912	0.0495944	0.0203566
-42.7941	0	0.0977201	-0.0346093	-0.00269113	0.0201399	0.0398694		0.0183993	0.0422822	0.016094	0.0255919	0.00837166
-42.6471	0	0.0694283	-0.0114973	-0.00466347	0.0177558	0.0259114		-0.0265999	0.0101195	0.00326712	-0.00440442	0.0112726
-42.5	0	0.0262872	-0.00655336	-0.00427728	0.0051522	0.0105879		0.0807479	0.0269182	-0.0068054	0.0336202	0.0254956
-42.3529	0	0.0289924	-0.0204332	0.00302227	0.00386048	0.0142741		0.092809	0.0188202	0.00672065	0.0394499	0.0269072
-42.2059	0	-0.0112136	0.00950206	0.00715311	0.00181387	0.00654892		0.119074	0.0597047	0.0054182	0.0613989	0.0328205
-42.0588	0	-0.0151178	0.0283764	0.00844029	0.00723296	0.0125702		0.076629	0.115487	0.0191667	0.0704275	0.0279776
-41.9118	0	-0.0118243	0.0199723	0.00413665	0.00409488	0.0091789		0.0317758	0.136464	0.0124457	0.0602284	0.0385239
-41.7647	0	-0.0242006	0.0205948	-0.000381133	-0.00132898	0.01294		0.119986	0.189887	0.00980759	0.10656	0.052416
-41.6176	0	-0.0245138	-0.0114596	0.00552466	-0.0101496	0.00869607		0.132858	0.217615	0.013933	0.121469	0.0590731
-41.4706	0	-0.0347871	-0.0343529	0.00971501	-0.0198083	0.0147622		0.119548	0.194634	0.0319144	0.115365	0.0470195
-41.3235	0	-0.056321	-0.0485113	0.00889446	-0.0319793	0.0205608		0.0174537	0.17476	0.0403118	0.0775086	0.0490716
-41.1765	0	-0.0640839	-0.0165155	0.00452957	-0.0253566	0.0202943		0.0167498	0.185352	0.0331474	0.0784163	0.0536768
-41.0294	0	-0.0627782	-0.0277962	6.08342e-05	-0.0301712	0.0181789		-0.0256699	0.190439	0.0339882	0.0662523	0.0644372
-40.8824	0	-0.0647804	-0.0155333	-0.0043032	-0.0282056	0.0185725		-0.0345179	0.138732	0.0124801	0.0388982	0.0517279
-40.7353	0	-0.0244769	-0.00708456	-0.000666796	-0.0107428	0.0071126		-0.0602573	0.114223	0.00938708	0.0211177	0.0507085
-40.5882	0	-0.0347641	-0.0225552	0.00402769	-0.0177639	0.0114516		-0.146499	0.0920257	0.0124523	-0.014007	0.0701156
-40.4412	0	-0.0124379	-0.0124936	0.000645895	-0.00809519	0.00437057		-0.162379	0.0890107	0.010758	-0.02087	0.0742729
-40.2941	0	-0.00662679	0.00255667	0.000651966	-0.00113938	0.00279825		-0.140662	0.138272	-0.0036066	-0.00199878	0.0805253
-40.1471	0	0.00359558	0.0121773	-0.00613373	0.00321305	0.0052894		-0.173873	0.170551	-0.0107417	-0.0046879	0.0994729
-40	0	0.0171289	-0.026203	-0.0107954	-0.00662317	0.0126816		-0.168878	0.130524	-0.0125002	-0.0169513	0.0864586
-39.8529	0	0.0197507	-0.00469181	-0.00873531	0.00210787	0.00889832		-0.0699335	0.149833	-0.0119828	0.0226388	0.0657603
-39.7059	0	0.0332628	-0.0247102	-0.00847431	2.6114e-05	0.0172666		-0.060745	0.1538	0.00343626	0.0321636	0.0635775
-39.5588	0	0.0446867	-0.0173876	-0.0127487	0.00485013	0.0199632		-0.0259445	0.170071	0.00685652	0.0503276	0.0606157
-39.4118	0	0.0426986	-0.0282036	-0.022933	-0.00281266	0.0228065		0.00666086	0.183654	0.000428915	0.0635814	0.0600634
-39.2647	0	0.0528087	0.00185094	-0.0259165	0.00958105	0.0230524		0.00841294	0.185459	-0.000454582	0.0644724	0.0605473
-39.1176	0	0.0455053	0.00822219	-0.0317758	0.00731722	0.0223137		-0.015532	0.135922	-0.0010576	0.0397774	0.0482535
-38.9706	0	0.0892928	0.0111991	-0.0303625	0.0233765	0.0350741		0.0550785	0.14215	0.00188931	0.0663727	0.0408818
-38.8235	0	0.0799889	0.0145705	-0.0286901	0.0219564	0.0315895		0.0448745	0.169486	-0.00108942	0.0710905	0.0509558
-38.6765	0	0.080397	0.0167084	-0.030972	0.0220445	0.03226		-0.00496727	0.110286	-0.0143165	0.0303339	0.0400668
-38.5294	0	0.0618862	0.0118369	-0.0341568	0.0131888	0.0277335		-0.000882193	0.190722	-0.030573	0.0530888	0.0693482
-38.3824	0	0.018396	0.0196324	-0.0410573	-0.00100963	0.020027		-0.0230994	0.185023	-0.0507952	0.0370429	0.0744209
-38.2353	0	0.0288237	0.0179434	-0.0410703	0.00189892	0.021713		-0.0115252	0.18179	-0.0512528	0.0396706	0.071979
-38.0882	0	0.0749779	0.0223036	-0.040523	0.0189195	0.0333852		0.0170864	0.179432	-0.0580312	0.0461623	0.0700743
-37.9412	0	0.072043	-0.0185268	-0.0374398	0.00535876	0.0337862		0.0501425	0.173635	-0.0523741	0.0571344	0.0653368
-37.7941	0	0.0825393	-0.0235913	-0.0391215	0.00660881	0.038229		0.0347643	0.165402	-0.0590715	0.0470314	0.0650894
-37.6471	0	0.109271	-0.0197882	-0.0415728	0.0159699	0.0470723		0.0503916	0.164825	-0.0705229	0.0482313	0.0679478
-37.5	0	0.155226	-0.0219443	-0.0483832	0.0282997	0.0639207		0.0185448	0.20752	-0.0687567	0.052436	0.0815346
-37.3529	0	0.167462	-0.0559729	-0.0479606	0.0211761	0.0731794		0.00379994	0.153011	-0.0605733	0.0320791	0.0632569
-37.2059	0	0.247776	-0.0547224	-0.044226	0.0496091	0.0991296		0.0190271	0.143908	-0.0453046	0.0392101	0.0555454
-37.0588	0	0.221719	-0.0650103	-0.0384621	0.0394157	0.0914735		0.0513364	0.0996403	-0.0374879	0.0378296	0.0401575
-36.9118	0	0.201262	-0.0973762	-0.0416201	0.0207552	0.0916773		0.157696	0.117456	-0.03482	0.0801105	0.0586276
-36.7647	0	0.251806	-0.0573272	-0.0422478	0.0507436	0.100625		0.199908	0.16202	-0.0437727	0.106052	0.0757065
-36.6176	0	0.262638	-0.0338447	-0.0419724	0.0622736	0.10021		0.242173	0.12731	-0.052864	0.10554	0.0858627
-36.4706	0	0.21333	-0.0148871	-0.0389312	0.0531706	0.08038		0.261786	0.109189	-0.046297	0.108226	0.0889371
-36.3235	0	0.192704	-0.0477061	-0.0321466	0.0376172	0.0776735		0.363439	0.0559215	-0.0366816	0.12756	0.120931
-36.1765	0	0.181384	-0.0108441	-0.0352539	0.0450953	0.0685077		0.374997	0.0512283	-0.0476819	0.126181	0.127643
-36.0294	0	0.149497	-0.0269099	-0.0343095	0.029426	0.0600737		0.3819	0.0948476	-0.0540125	0.140912	0.127928
-35.8824	0	0.219515	0.0125637	-0.0354365	0.0655473	0.0782208		0.32987	0.129865	-0.0640961	0.13188	0.113733
-35.7353	0	0.2412	0.0373394	-0.0334338	0.0817019	0.0823245		0.214038	0.0633711	-0.0735172	0.067964	0.0830418
-35.5882	0	0.260221	0.0254144	-0.0323421	0.0844312	0.0894624		0.214988	-0.00450627	-0.0694352	0.0470154	0.0860523
-35.4412	0	0.233836	0.0217123	-0.0303917	0.0750523	0.0808042		0.149407	0.0164028	-0.0478508	0.0393197	0.0580849
-35.2941	0	0.311049	-0.0082992	-0.0342138	0.0895121	0.111021		0.159131	-0.0288063	-0.0527811	0.0258478	0.0669999
-35.1471	0	0.356023	0.031189	-0.03872	0.116164	0.121616		0.0892871	-0.0186622	-0.0562125	0.00480412	0.0436102
-35	0	0.335195	0.0484897	-0.0374616	0.115408	0.11266		0.138172	-0.0425168	-0.045659	0.0166652	0.0607599
-34.8529	0	0.347716	0.060358	-0.0362213	0.123951	0.115304		0.176088	-0.0572907	-0.0387458	0.0266839	0.0748938
-34.7059	0	0.304378	0.0875626	-0.0350451	0.118965	0.099233		0.246519	-0.0887516	-0.0271317	0.0435451	0.103034
-34.5588	0	0.233135	0.0653979	-0.029268	0.0897551	0.0767221		0.274847	-0.063739	-0.0144161	0.065564	0.105606
-34.4118	0	0.181672	0.046491	-0.0313777	0.0655951	0.0622395		0.312216	0.00545316	-0.00763735	0.103344	0.104504
-34.2647	0	0.168716	0.0330901	-0.0343454	0.0558202	0.0597104		0.328614	-0.0133448	-0.0175795	0.0992298	0.114698
-34.1176	0	0.134816	0.0583215	-0.0367622	0.0521252	0.0496272		0.351206	-0.00271734	-0.0175614	0.110309	0.120525
-33.9706	0	0.0868184	0.0409406	-0.0352569	0.0308341	0.0356006		0.374599	-0.00545048	-0.0212404	0.115969	0.129395
-33.8235	0	0.141839	0.0290336	-0.0318259	0.046349	0.0508749		0.316001	0.0488473	-0.0313834	0.111155	0.105009
-33.6765	0	0.0960157	0.0218477	-0.0303738	0.0291632	0.0366684		0.3114	0.0465456	-0.0291261	0.109607	0.103234
-33.5294	0	0.0996161	-0.0395333	-0.0330183	0.00902147	0.0453363		0.288074	0.0655278	-0.0431989	0.103468	0.0974935
-33.3824	0	0.134904	-0.0349751	-0.040781	0.0197159	0.0576184		0.239147	0.126095	-0.0489771	0.105422	0.0838142
-33.2353	0	0.146073	-0.0185865	-0.0380251	0.0298204	0.0583965		0.171091	0.129823	-0.0572966	0.0812059	0.0702685
-33.0882	0	0.147736	-0.0340666	-0.037193	0.0254923	0.0611288		0.20344	0.160908	-0.0601545	0.101398	0.0817039
-32.9412	0	0.141364	-0.0458441	-0.030519	0.021667	0.0600118		0.204497	0.176434	-0.0488379	0.110698	0.080178
-32.7941	0	0.169582	-0.0323153	-0.0276361	0.0365436	0.066533		0.215551	0.161932	-0.0375912	0.113297	0.0770157
-32.6471	0	0.185803	-0.0393374	-0.0275135	0.0396508	0.0731559		0.238158	0.152613	-0.0354211	0.11845	0.0808016
-32.5	0	0.22232	-0.0458273	-0.0244088	0.0506948	0.0860352		0.316248	0.11791	-0.0341825	0.133325	0.101454
-32.3529	0	0.296963	-0.0208588	-0.0244448	0.0838866	0.106543		0.301354	0.117835	-0.0237542	0.131812	0.0941104
-32.2059	0	0.340797	-0.0281805	-0.017022	0.0985316	0.121176		0.357672	0.0961042	-0.0159149	0.145954	0.110688
-32.0588	0	0.301317	-0.0412949	-0.0119319	0.0826968	0.109638		0.42814	0.0640674	-0.00954359	0.160888	0.135305
-31.9118	0	0.396326	-0.0202011	-0.0114653	0.121553	0.13741		0.449605	0.0564825	-0.00612994	0.166653	0.142626
-31.7647	0	0.390438	-0.0392289	-0.0100733	0.113712	0.138619		0.372894	0.0563404	-0.00952442	0.139903	0.118037
-31.6177	0	0.373123	-0.063208	-0.0115645	0.0994503	0.137646		0.367926	0.102823	-0.0170448	0.151235	0.113737
-31.4706	0	0.364475	-0.0679822	-0.0125213	0.094657	0.135855		0.402885	0.085035	-0.00822611	0.159898	0.124441
-31.3235	0	0.433177	-0.0238051	-0.0216031	0.129256	0.151962		0.320006	0.0667469	-0.00533116	0.127141	0.098652
-31.1765	0	0.429813	-0.0315375	-0.0181172	0.126719	0.151596		0.299332	0.0441964	-0.0077135	0.111938	0.0948877
-31.0294	0	0.341693	-0.0135643	-0.0211312	0.102332	0.1197		0.238841	-0.00142034	-0.0137502	0.0745568	0.0822192
-30.8823	0	0.408753	-0.000798378	-0.0306754	0.12576	0.141759		0.153328	0.0267183	-0.0160695	0.0546589	0.0508573
-30.7353	0	0.284198	-0.00319867	-0.0320059	0.0829977	0.100943		0.108457	0.0483323	-0.0191129	0.045892	0.0368464
-30.5882	0	0.292224	0.0203578	-0.0332527	0.0931097	0.100753		0.128918	0.134436	-0.0216451	0.0805697	0.0511322
-30.4412	0	0.286901	0.0103626	-0.0281357	0.0897092	0.0992202		0.117481	0.153664	-0.0149843	0.0853868	0.051261
-30.2941	0	0.248375	0.0167952	-0.0247416	0.0801429	0.0849665		0.0407398	0.137194	-0.0114681	0.0554887	0.0435442
-30.1471	0	0.172151	-0.0264466	-0.0170634	0.0428802	0.0646919		0.0922046	0.176259	-0.0149732	0.0844967	0.0553382
-30	0	0.133937	-0.0394415	-0.0181972	0.0254328	0.0545977		0.0826815	0.206379	-0.00913517	0.0933085	0.0624401
-29.8529	0	0.185113	-0.0299921	-0.0214855	0.0445453	0.0703269		0.0677777	0.194294	-0.0150277	0.0823481	0.0608637
-29.7059	0	0.130796	-0.0106941	-0.0154066	0.0348985	0.0479681		0.05152	0.193816	-0.0120874	0.0777494	0.0608687
-29.5588	0	0.146034	-0.0148567	-0.0103153	0.0402872	0.0528895		0.0893613	0.191106	-0.00435503	0.0920375	0.0564407
-29.4118	0	0.13192	-0.0104571	-0.00593887	0.0385081	0.0467243		0.0711479	0.120708	-0.00609164	0.0619215	0.0368935
-29.2647	0	0.0954066	0.00711036	-0.0141182	0.0294662	0.0335348		0.0175645	0.0755333	-0.0242486	0.0229497	0.0289301
-29.1177	0	0.127189	0.00957492	-0.0167896	0.0399916	0.0442582		0.095601	0.102665	-0.0327396	0.0551755	0.0440049
-28.9706	0	0.0854347	0.0101444	-0.0188257	0.0255845	0.0310717		0.0240885	0.105089	-0.0385997	0.0301925	0.0415914
-28.8235	0	0.108436	0.012183	-0.0128189	0.0359335	0.0369629		0.0702459	0.0987714	-0.0395006	0.0431722	0.0421486
-28.6765	0	0.119632	0.012418	-0.00613984	0.0419699	0.0391987		0.1039	0.138909	-0.0294152	0.0711316	0.0512791
-28.5294	0	0.14658	0.00199345	-0.00868456	0.0466295	0.0500701		0.105736	0.165243	-0.0372089	0.0779231	0.0600744
-28.3823	0	0.110859	-0.00135755	-0.0132526	0.0320829	0.0395374		0.0331129	0.142349	-0.0515141	0.0413159	0.0561136
-28.2353	0	0.124582	-0.00273747	-0.0247608	0.0323612	0.0465466		0.046065	0.143224	-0.0554376	0.0446171	0.0573532
-28.0882	0	0.148255	0.0134555	-0.0255959	0.0453715	0.0526624		0.112123	0.160985	-0.0439361	0.0763905	0.0617947
-27.9412	0	0.150042	-0.000964145	-0.0249041	0.0413911	0.054763		0.0730192	0.0962474	-0.0464524	0.040938	0.0442067
-27.7941	0	0.179791	0.00606698	-0.0219422	0.0546387	0.0630965		0.0728688	0.113286	-0.0374652	0.0495633	0.0450514
-27.6471	0	0.156586	-0.006919	-0.0320939	0.0391912	0.0591458		0.0733269	0.0906518	-0.0394968	0.041494	0.040803
-27.5	0	0.088638	-0.0358532	-0.038614	0.00472359	0.0419648		0.0621708	0.0682741	-0.0488212	0.0272079	0.0380554
-27.3529	0	0.120575	-0.028078	-0.040307	0.0173967	0.0517098		0.0443067	-0.00578128	-0.0521793	-0.0045513	0.0278599
-27.2059	0	0.151681	0.0121629	-0.0396371	0.0414023	0.0571311		0.0944417	0.0682538	-0.0388611	0.0412781	0.0407765
-27.0588	0	0.236166	0.00373739	-0.0323022	0.0692005	0.0841287		0.0947721	0.0663959	-0.0293379	0.0439434	0.0375451
-26.9118	0	0.254271	0.00192358	-0.0253935	0.0769336	0.0890186		0.0647771	0.0714833	-0.0253214	0.0369797	0.0312106
-26.7647	0	0.214552	0.0171777	-0.0253035	0.0688088	0.0738963		0.0406606	0.135694	-0.0169403	0.0531381	0.0445013
-26.6177	0	0.184688	0.0237647	-0.0344235	0.0580099	0.0655288		0.012764	0.0952094	-0.0316251	0.0254494	0.0371593
-26.4706	0	0.153211	0.0382893	-0.0322306	0.05309	0.0540416		-0.0153777	0.121716	-0.0402582	0.0220267	0.0503595
-26.3235	0	0.19656	0.0507853	-0.0289007	0.072815	0.0660105		0.0217496	0.127528	-0.0320017	0.039092	0.0468615
-26.1765	0	0.272823	0.0252732	-0.0295682	0.0895093	0.093014		0.114453	0.195758	-0.0242669	0.0953147	0.0642325
-26.0294	0	0.279012	0.00166471	-0.0267533	0.0846412	0.0975311		0.106552	0.132031	-0.0292133	0.0697899	0.0500451
-25.8823	0	0.162849	0.00730847	-0.0291222	0.0470118	0.0588656		0.138376	0.149759	-0.0296518	0.086161	0.0579996
-25.7353	0	0.136726	-0.0289083	-0.0407209	0.0223655	0.0572817		0.161164	0.111305	-0.0438735	0.0761987	0.0617373
-25.5882	0	0.168092	-0.0456514	-0.0431277	0.0264375	0.0708308		0.165923	0.0832388	-0.0444317	0.0682432	0.0611852
-25.4412	0	0.169053	-0.0537251	-0.0408953	0.0248108	0.0722161		0.20422	0.141869	-0.0407643	0.101775	0.0735072
-25.2941	0	0.151859	-0.038949	-0.0393812	0.0245096	0.0636749		0.254609	0.0984716	-0.0282545	0.108275	0.0818026
-25.1471	0	0.139675	-0.0540355	-0.0409064	0.0149109	0.0624969		0.24613	0.158072	-0.0270403	0.125721	0.0804995
-25	0	0.00392178	-0.0464873	-0.0403738	-0.0276464	0.0158825		0.163243	0.118581	-0.0332214	0.0828678	0.0594592
-24.8529	0	0.0329057	-0.068637	-0.0453521	-0.0270278	0.0307114		0.142878	0.201974	-0.0431097	0.100581	0.0738428
-24.7059	0	0.0961985	-0.0556225	-0.0458053	-0.00174309	0.0490528		0.118704	0.21858	-0.0498375	0.0958154	0.078326
-24.5588	0	0.137727	-0.0204995	-0.0346233	0.0275347	0.0552468		0.109791	0.277557	-0.030927	0.118807	0.0891658
-24.4118	0	0.122591	-0.0195228	-0.0309595	0.0240362	0.0493878		0.145711	0.291298	-0.0307231	0.135429	0.0931015
-24.2647	0	0.160846	0.00404107	-0.0281922	0.0455651	0.0583868		0.149766	0.246668	-0.0246658	0.123923	0.079386
-24.1177	0	0.176729	-0.00530822	-0.0293664	0.0473514	0.0650604		0.070882	0.252912	-0.0307432	0.0976835	0.0829734
-23.9706	0	0.12502	-0.0186614	-0.0332444	0.0243714	0.0505001		0.070487	0.222502	-0.0352739	0.0859051	0.0748118
-23.8235	0	0.129604	0.00463649	-0.030891	0.0344499	0.04867		0.120147	0.220907	-0.02709	0.104655	0.0720085
-23.6765	0	0.0989036	0.043831	-0.029389	0.0377819	0.0371582		0.189605	0.13215	-0.010561	0.103731	0.0595045
-23.5294	0	0.0658061	0.038341	-0.0260111	0.0260453	0.027209		0.203883	0.0661378	0.00800245	0.0926745	0.0580817
-23.3823	0	0.126762	0.0333358	-0.0256857	0.044804	0.0443798		0.207013	0.0112495	0.0200064	0.0794229	0.063845
-23.2353	0	0.0764686	0.0426281	-0.0287275	0.030123	0.0310045		0.169188	-0.00187799	0.0236364	0.0636489	0.0532812
-23.0882	0	0.0443294	0.0256387	-0.0259878	0.0146601	0.021028		0.106632	-0.0475389	0.0249254	0.0280062	0.044532
-22.9412	0	0.10399	0.0180535	-0.0241716	0.0326239	0.0377075		0.124772	-0.0315871	0.0345582	0.0425811	0.0453149
-22.7941	0	0.146224	0.06054	-0.0164369	0.0634423	0.0469785		0.121778	-0.0506356	0.0577817	0.0429747	0.0503191
-22.6471	0	0.1773	0.0400034	-0.0109941	0.0687699	0.0562267		0.142802	-0.0605909	0.0744008	0.0522039	0.0597541
-22.5	0	0.178358	-0.00234027	-0.00773857	0.0560931	0.0611524		0.0909754	-0.0357691	0.0835859	0.0462641	0.041072
-22.3529	0	0.167294	-0.00225356	-0.00749762	0.0525142	0.0574098		0.0353161	0.00332236	0.0784736	0.0390373	0.0217739
-22.2059	0	0.141728	-0.00161431	-0.00389701	0.0454057	0.0481658		-0.00205067	0.00198961	0.0700619	0.0233336	0.0233932
-22.0588	0	0.235928	-0.0166186	0.00572495	0.0750115	0.0807164		0.0284093	-0.000957762	0.0895037	0.0389851	0.026644
-21.9118	0	0.273526	-0.0454381	0.0140185	0.0807021	0.0979278		0.103196	0.00864102	0.114049	0.0752955	0.0334742
-21.7647	0	0.285764	-0.0554604	0.0260413	0.0854483	0.102884		0.124702	0.0676839	0.140394	0.110927	0.0220907
-21.6177	0	0.318176	-0.0697273	0.031865	0.0934378	0.116133		0.0867771	0.074913	0.139347	0.100346	0.019799
-21.4706	0	0.236982	-0.0540229	0.0354023	0.0727871	0.0860604		0.0729564	0.0795996	0.136047	0.0962009	0.020015
-21.3235	0	0.214687	-0.0283948	0.0419274	0.076073	0.0722186		0.0547933	0.0414213	0.145803	0.0806726	0.0327933
-21.1765	0	0.236589	-0.0337561	0.0454881	0.0827737	0.0802377		0.0819283	0.0295825	0.152515	0.0880087	0.0356177
-21.0294	0	0.169192	-0.0337094	0.0524698	0.0626509	0.0587934		0.0671299	0.0779432	0.178379	0.107817	0.0354186
-20.8823	0	0.115411	-0.0277842	0.0596811	0.0491027	0.0416739		0.0428216	0.0991479	0.180981	0.10765	0.0401091
-20.7353	0	0.120031	0.0213654	0.0548946	0.0654305	0.0289655		-0.0255127	0.185698	0.168173	0.109453	0.067672
-20.5882	0	0.0742627	0.03456	0.0449964	0.051273	0.0118831		-0.0596279	0.120995	0.145155	0.0688406	0.0646118
-20.4412	0	0.0489661	0.0449281	0.0428093	0.0455678	0.00180587		-0.0263625	0.10756	0.135118	0.0721051	0.0498724
-20.2941	0	0.0936315	0.0240347	0.0415246	0.0530636	0.0209029		-0.0244127	0.0908565	0.131486	0.0659767	0.0466918
-20.1471	0	0.112829	0.0211588	0.0440757	0.0593545	0.0275435		-0.0145123	0.103385	0.132008	0.0736271	0.0448376
-20	0	0.103196	0.0103625	0.0473555	0.0536379	0.0269821		-0.0222654	0.120353	0.134594	0.0775607	0.0500821
-19.8529	0	0.0527605	0.0216137	0.0416593	0.0386778	0.00911407		-0.0123421	0.106775	0.112749	0.0690607	0.0407379
-19.7059	0	-0.00343297	0.0222141	0.0300192	0.0162668	0.0101043		-0.0163831	0.0892463	0.090384	0.0544157	0.035401
-19.5588	0	-0.0548605	-0.00941243	0.0315082	-0.0109216	0.0249439		-0.0192887	0.000911045	0.0905965	0.0240729	0.033769
-19.4118	0	-0.0262801	-0.0129615	0.0380193	-0.000407442	0.0195943		-0.0320126	0.00816745	0.0911691	0.0224413	0.0362686
-19.2647	0	0.00427135	0.00571877	0.0414793	0.0171565	0.0121686		-0.0336764	0.0224679	0.0973049	0.0286988	0.0379392
-19.1177	0	0.0657893	0.0256502	0.0419427	0.0444607	0.0116554		-0.0898514	0.0864352	0.0909326	0.0291721	0.0595259
-18.9706	0	0.0457706	0.0294068	0.0334911	0.0362228	0.00491731		-0.0886366	0.0789948	0.06836	0.0195727	0.0541917
-18.8235	0	0.0174396	0.0436468	0.0323187	0.031135	0.0075885		-0.0851721	0.0973515	0.0478355	0.020005	0.0544965
-18.6765	0	0.0406552	0.0341296	0.0334542	0.0360797	0.00229605		-0.0922205	0.143623	0.0350433	0.0288154	0.0681535
-18.5294	0	0.0531649	0.0697062	0.0385954	0.0538222	0.00898692		-0.118436	0.187604	0.0403529	0.0365071	0.0883671
-18.3823	0	0.090531	0.079531	0.0402642	0.0701088	0.0152564		-0.0961381	0.185438	0.039197	0.0428322	0.0813042
-18.2353	0	0.00825514	0.0949531	0.0351493	0.0461192	0.0256215		-0.0816111	0.191187	0.0362202	0.0485986	0.0789928
-18.0882	0	-0.048284	0.0790659	0.025157	0.0186463	0.0369066		-0.139299	0.240089	0.01746	0.0394167	0.110069
-17.9412	0	-0.0858244	0.0743026	0.0212858	0.00325468	0.0470957		-0.148854	0.178945	0.00781784	0.0126362	0.0946581
-17.7941	0	-0.0864789	0.0581715	0.0296899	0.000460851	0.0442406		-0.169558	0.19913	0.0168042	0.0154589	0.106433
-17.6471	0	-0.0482164	0.0558479	0.0332584	0.01363	0.0316033		-0.171562	0.17284	0.0308421	0.0107066	0.0999289
-17.5	0	-0.0331431	0.047351	0.0332306	0.0158128	0.024815		-0.143115	0.098596	0.0365152	-0.00266791	0.0724742
-17.3529	0	-0.0324355	0.0184198	0.0255546	0.00384634	0.0182574		-0.139779	0.0866664	0.0216867	-0.0104752	0.067318
-17.2059	0	-0.06327	0.0108444	0.0187189	-0.0112356	0.0261163		-0.142193	0.105401	0.0037493	-0.0110144	0.0718545
-17.0588	0	-0.00760861	0.0118782	0.0143509	0.00620685	0.00694451		-0.123186	0.141087	-0.010265	0.00254538	0.0765576
-16.9118	0	0.0458792	-0.00272201	0.0202652	0.0211408	0.0140368		-0.0482655	0.0757011	0.000217096	0.00921759	0.0360679
-16.7647	0	0.0921711	-0.0109003	0.0208368	0.0340358	0.0304772		0.00109861	0.10022	0.0167227	0.039347	0.0307687
-16.6177	0	0.107954	-0.00970111	0.0164802	0.0382442	0.0356647		0.043482	0.0533437	0.0131332	0.036653	0.0120996
-16.4706	0	0.0888582	-0.00581524	0.00465569	0.0292329	0.0299655		0.0598504	0.128159	0.00118701	0.0630654	0.0366888
-16.3235	0	0.133328	0.00497842	-0.0043136	0.0446643	0.0444129		0.0687883	0.133682	-0.00999767	0.0641574	0.0415412
-16.1765	0	0.172026	0.00784756	-0.00327898	0.058865	0.0566718		0.0704074	0.0782151	-0.014981	0.0445472	0.0298493
-16.0294	0	0.237774	0.0187322	-0.00184104	0.0848885	0.0766733		0.0799478	0.089059	0.00219497	0.0570672	0.0275619
-15.8824	0	0.272701	0.0437356	0.00308584	0.106508	0.0839213		0.0748854	0.0316197	0.0089298	0.0384783	0.0193461
-15.7353	0	0.253333	0.0316356	-0.00204891	0.0943065	0.0801055		0.04698	0.0159037	0.00110284	0.0213288	0.0135185
-15.5882	0	0.191577	0.0364418	-0.0104437	0.0725251	0.0610454		0.0168466	-0.00430238	-0.0192451	-0.00223363	0.01047
-15.4412	0	0.146854	0.0558874	-0.0206602	0.0606938	0.0484169		-0.0283814	0.0622644	-0.0318816	0.000667166	0.0308152
-15.2941	0	0.169621	0.0683519	-0.020573	0.0724668	0.0549429		0.0185692	-0.0735363	-0.0271551	-0.0273741	0.0265888
-15.1471	0	0.173001	0.0536535	-0.0153507	0.0704348	0.0550162		0.0309356	-0.0359435	-0.0161178	-0.00704191	0.0198325
-15	0	0.164487	0.031346	-0.0109398	0.0616312	0.052857		0.0556575	-0.0131269	0.00648944	0.01634	0.0204581
-14.8529	0	0.099028	0.0334889	-0.0117578	0.040253	0.0321595		0.0404869	-0.0125029	0.00335316	0.0104457	0.0157025
-14.7059	0	0.0490282	0.0181285	-0.0176775	0.0164931	0.0192737		0.0844252	0.0178768	-0.00482101	0.0324937	0.0267797
-14.5588	0	0.00833852	0.0235991	-0.0183198	0.0045393	0.0122491		0.0904383	0.00767521	-0.00828042	0.0299444	0.0305957
-14.4118	0	0.0183638	0.0167349	-0.012276	0.00760755	0.00995291		0.134886	0.0228794	0.00764647	0.0551373	0.0401161
-14.2647	0	0.12919	0.0228838	-0.00362904	0.0494815	0.0405824		0.182548	0.0370243	0.0255208	0.0816977	0.0505344
-14.1176	0	0.18188	0.000692308	0.00187612	0.0614828	0.0601996		0.1572	0.101873	0.0279492	0.095674	0.0374399
-13.9706	0	0.102774	0.000546214	-0.00595515	0.0324549	0.0352094		0.14459	0.0708359	0.0205829	0.0786695	0.0360114
-13.8235	0	0.109743	0.00518301	-0.0160121	0.0329712	0.0388703		0.139236	0.0875263	-0.00122414	0.0751794	0.0410146
-13.6765	0	0.161843	0.00186324	-0.0187556	0.0483169	0.0570743		0.152775	0.108532	-0.0144966	0.0822701	0.0500407
-13.5294	0	0.192988	-0.0224202	-0.0149178	0.0518834	0.0705857		0.163696	0.0986773	-0.00817235	0.0847336	0.0501015
-13.3824	0	0.226467	0.000865821	-0.0101833	0.0723831	0.0771078		0.251435	0.15949	0.000153642	0.137026	0.073403
-13.2353	0	0.188749	-0.000317751	-0.0122684	0.058721	0.0651055		0.225979	0.188111	-0.00294398	0.137049	0.0708447
-13.0882	0	0.122661	-0.0219996	-0.0209896	0.0265573	0.0480528		0.214482	0.12212	-0.0164492	0.106718	0.0671075
-12.9412	0	0.0789744	-0.0194562	-0.0278236	0.0105649	0.0342899		0.191694	0.13688	-0.0315889	0.0989951	0.0671821
-12.7941	0	0.105317	-0.0225673	-0.0265671	0.0187275	0.0433101		0.129306	0.154477	-0.0379196	0.0819545	0.0603759
-12.6471	0	0.131552	-0.00121141	-0.0213664	0.0363248	0.0479679		0.173995	0.146697	-0.0212557	0.0998121	0.0610447
-12.5	0	0.095651	0.0110801	-0.0178924	0.0296129	0.0340618		0.154411	0.145421	-0.00873346	0.0970331	0.0529469
-12.3529	0	0.0714688	0.0213796	-0.020782	0.0240222	0.0266633		0.10607	0.1071	-0.00396891	0.0697338	0.0368525
-12.2059	0	0.0965588	0.000979084	-0.0269077	0.0235434	0.0373847		0.0461569	0.0819181	-0.0127248	0.0384501	0.0275915
-12.0588	0	0.141039	0.015137	-0.0316189	0.0415189	0.0515579		0.0461965	0.0511599	-0.0241191	0.0244124	0.024308
-11.9118	0	0.0967548	0.0124367	-0.030309	0.0262942	0.0373289		-0.000290781	0.0780849	-0.0214406	0.0187845	0.0302723
-11.7647	0	0.0315901	-0.00142617	-0.0254751	0.00156296	0.016541		-0.0159402	0.0771595	-0.000344786	0.0202915	0.0287882
-11.6176	0	0.0190451	0.0239302	-0.0178209	0.00838481	0.0131785		0.0602563	0.0715135	0.00494175	0.0455705	0.0205727
-11.4706	0	-0.0139282	0.0299197	-0.018916	-0.000974837	0.0155142		0.0355524	0.0819456	-0.00199193	0.038502	0.0242755
-11.3235	0	-0.0579545	0.0180353	-0.0255032	-0.0218075	0.0220141		0.0342941	0.048554	-0.0204424	0.0208019	0.021029
-11.1765	0	-0.092531	0.00835491	-0.0293065	-0.0378275	0.0294333		0.0367197	0.0805126	-0.0292584	0.0293246	0.0319032
-11.0294	0	-0.114836	0.00836958	-0.030877	-0.0457812	0.0363388		-0.00727275	0.0929997	-0.0317209	0.018002	0.0381572
-10.8824	0	-0.112055	0.011765	-0.0245392	-0.0416098	0.0367488		-0.0308965	0.150137	-0.0274176	0.0306075	0.059773
-10.7353	0	-0.0709328	0.024856	-0.0180141	-0.0213637	0.0277025		0.01403	0.131364	-0.0226183	0.0409252	0.0464404
-10.5882	0	-0.00982197	0.0629469	-0.0266184	0.00883549	0.0274867		0.0411866	0.109734	-0.0395901	0.0371103	0.0431544
-10.4412	0	0.0262428	0.0640945	-0.037647	0.0175634	0.0296891		-0.0271333	0.0903488	-0.0517006	0.00383831	0.0438328
-10.2941	0	0.0706112	0.0401193	-0.0413705	0.02312	0.0334251		-0.0309471	0.109533	-0.0668374	0.00391603	0.053815
-10.1471	0	0.0868309	0.0222911	-0.0389331	0.0233963	0.0363091		0.028405	0.131446	-0.0664774	0.0311246	0.0571518
-10	0	0.113835	0.0516217	-0.0332779	0.0440596	0.0426358		0.0150231	0.166527	-0.0588649	0.0408951	0.0663385
-9.85294	0	0.068623	0.0612949	-0.0313101	0.0328693	0.0321593		0.000828143	0.160194	-0.0547379	0.035428	0.0644121
-9.70588	0	0.0711233	0.0593605	-0.0378956	0.0308628	0.0345465		0.0472509	0.130229	-0.0501183	0.0424539	0.052117
-9.55882	0	0.053326	0.0637217	-0.0437098	0.024446	0.0342097		0.0166614	0.16514	-0.0598766	0.0406417	0.0660541
-9.41177	0	0.0433546	0.0182973	-0.0424578	0.00639804	0.0254764		-0.0215659	0.206071	-0.0669491	0.0391852	0.0844649
-9.26471	0	0.0738853	-0.00836638	-0.0368296	0.00956312	0.0331941		0.00640577	0.196206	-0.061352	0.0470865	0.0770827
-9.11765	0	0.0235735	0.0157384	-0.0278158	0.00383204	0.0159848		0.0132387	0.190347	-0.0445045	0.053027	0.0706543
-8.97059	0	0.0705785	0.032229	-0.0262468	0.0255202	0.0281516		-0.00753171	0.147036	-0.0371054	0.0341329	0.0570933
-8.82353	0	0.0319232	0.0317228	-0.029008	0.011546	0.0202771		-0.0227301	0.0959337	-0.0493979	0.00793523	0.0446676
-8.67647	0	0.0907789	0.0477372	-0.0308737	0.0358808	0.0356149		-0.000634862	0.0891004	-0.0607045	0.00925369	0.0435267
-8.52941	0	0.116306	0.0448147	-0.0337442	0.0424588	0.0433317		-0.00248319	0.0836489	-0.0726621	0.00283454	0.0452014
-8.38235	0	0.129819	0.0415573	-0.0306825	0.0468979	0.0464096		0.0123241	0.0985182	-0.0781057	0.0109122	0.0509918
-8.23529	0	0.117572	0.0790104	-0.0220794	0.0581677	0.0416391		0.00777469	0.0608207	-0.0660697	0.000841872	0.0367937
-8.08823	0	0.0517263	0.111951	-0.0246093	0.0463561	0.0395129		0.0430495	0.0754095	-0.0640819	0.0181257	0.0421519
-7.94118	0	0.0622411	0.0901175	-0.0369057	0.0384843	0.0385444		-0.00394477	0.0194919	-0.0742967	-0.0195832	0.0281809
-7.79412	0	0.0668715	0.0913514	-0.0449324	0.0377635	0.0419475		-0.0475219	0.0276706	-0.0816228	-0.0338247	0.032285
-7.64706	0	0.0834184	0.0632503	-0.0535443	0.0310415	0.0426917		-0.0153059	0.0296358	-0.0819532	-0.0225411	0.0324155
-7.5	0	0.0594432	0.0554622	-0.0558372	0.0196894	0.0377808		-0.02463	0.0596383	-0.0729857	-0.0126591	0.0387503
-7.35294	0	0.0202192	0.0465578	-0.0477505	0.00634217	0.0280947		-0.0527846	0.0314599	-0.0588339	-0.0267196	0.0291421
-7.20588	0	0.00634591	0.0295348	-0.0483331	-0.00415081	0.0230831		-0.0699702	0.0507504	-0.0599491	-0.0263896	0.0386783
-7.05882	0	-0.0655756	0.0317756	-0.058968	-0.0309227	0.0314071		-0.0845297	0.0632559	-0.0739748	-0.0317495	0.0476004
-6.91176	0	-0.0310367	0.0266678	-0.0608223	-0.0217304	0.0256813		-0.113598	0.0400236	-0.0856481	-0.053074	0.0472429
-6.76471	0	-0.0272217	0.032421	-0.0586374	-0.0178127	0.026704		-0.0479708	0.0713072	-0.0941712	-0.0236116	0.0492978
-6.61765	0	-0.0386391	0.042237	-0.0510709	-0.0158243	0.0292516		-0.0250558	0.16122	-0.0871839	0.0163268	0.0746336
-6.47059	0	-0.012247	0.0757668	-0.039204	0.00810529	0.0347142		-0.0421286	0.198807	-0.0780294	0.0262162	0.0869153
-6.32353	0	-0.00761973	0.0550977	-0.0398136	0.00255478	0.0278668		-0.0866054	0.167507	-0.0725116	0.00279682	0.0824557
-6.17647	0	0.00484387	0.0530119	-0.0483008	0.003185	0.0292582		-0.113566	0.159659	-0.0828237	-0.0122435	0.0864082
-6.02941	0	-0.0025271	0.075388	-0.052646	0.00673831	0.0372494		-0.113026	0.132948	-0.0799419	-0.0200066	0.0770712
-5.88235	0	0.017435	0.0709107	-0.0512869	0.0123529	0.0353668		-0.067592	0.0987464	-0.07947	-0.0161052	0.0575281
-5.73529	0	-0.0249569	0.0412523	-0.0403324	-0.00801233	0.025029		-0.0413162	0.163131	-0.0532183	0.0228653	0.0702167
-5.58824	0	-0.0455327	0.0716302	-0.0337665	-0.00255632	0.0372485		-0.0964545	0.181436	-0.0338844	0.0170325	0.084163
-5.44118	0	-0.0964881	0.0496442	-0.0350399	-0.0272946	0.0423621		-0.0814154	0.151361	-0.039558	0.0101292	0.0716423
-5.29412	0	-0.12993	-0.0114379	-0.0421765	-0.0611815	0.0355011		-0.0903982	0.0914006	-0.051441	-0.0168129	0.0552631
-5.14706	0	-0.117841	-0.00186688	-0.0394915	-0.0530666	0.0341601		-0.0452433	0.110617	-0.0628966	0.000825827	0.0551318
-5	0	-0.160267	0.017358	-0.0348124	-0.0592405	0.0527106		-0.00412617	0.104051	-0.0589148	0.0136699	0.0478781
-4.85294	0	-0.145816	-0.0125831	-0.0294674	-0.0626222	0.0418815		0.000728461	0.0901848	-0.0482482	0.0142217	0.0405276
-4.70588	0	-0.128921	3.43108e-05	-0.0223787	-0.0504218	0.0397793		-0.0239456	0.146802	-0.0297547	0.0310339	0.0579084
-4.55882	0	-0.089286	0.00385827	-0.0322104	-0.0392127	0.0271154		-0.0353561	0.0869915	-0.0342031	0.00581077	0.0405917
-4.41176	0	-0.0564259	0.00219966	-0.038407	-0.0308777	0.0173374		-0.0332831	0.0627347	-0.0369157	-0.00248805	0.0326282
-4.26471	0	-0.0123708	0.0102649	-0.0427623	-0.0149561	0.0153621		-0.0545087	0.0809475	-0.040794	-0.00478507	0.0430487
-4.11765	0	-1.68414e-05	0.0713154	-0.043967	0.00911054	0.0335906		-0.0328609	0.134625	-0.03073	0.0236781	0.055477
-3.97059	0	0.00898983	0.0863619	-0.0396987	0.018551	0.0367032		-0.0532838	0.143396	-0.0186603	0.0238173	0.060619
-3.82353	0	0.0343028	0.0785804	-0.0429966	0.0232955	0.0355252		-0.0466119	0.166864	-0.0167409	0.0345037	0.0667395
-3.67647	0	0.0489938	0.083164	-0.0529083	0.0264165	0.0408706		-0.0343856	0.173726	-0.0320447	0.0357653	0.0689837
-3.52941	0	0.0459133	0.0687242	-0.0601546	0.018161	0.0397076		0.0278647	0.105391	-0.0529146	0.0267804	0.0457021
-3.38235	0	0.0591543	0.0947544	-0.0615245	0.0307947	0.0472898		0.0425529	0.116059	-0.0646878	0.0313081	0.0524792
-3.23529	0	0.087278	0.0674718	-0.057909	0.0322803	0.0454557		0.0454078	0.137167	-0.065968	0.0388689	0.058731
-3.08824	0	0.138795	0.0872159	-0.050291	0.0585733	0.0564319		0.0828562	0.0938181	-0.0550568	0.0405392	0.0479026
-2.94118	0	0.0998829	0.0691152	-0.0445127	0.0414952	0.0439115		0.0652691	0.0973171	-0.0619214	0.033555	0.0486264
-2.79412	0	0.103338	0.0692039	-0.0528367	0.0399018	0.0474047		0.0765192	0.0460023	-0.0728172	0.0165681	0.0455526
-2.64706	0	0.0983267	0.0625074	-0.0539745	0.0356199	0.0459751		0.0571	0.0445772	-0.0805467	0.00704349	0.0439441
-2.5	0	0.0727439	0.0536373	-0.047469	0.026304	0.0372966		0.0737817	0.0265591	-0.0762399	0.00803364	0.044287
-2.35294	0	0.102819	0.0400695	-0.0419457	0.0336475	0.0419131		0.0604216	0.0566726	-0.0615422	0.0185173	0.0400444
-2.20588	0	0.0611125	0.0321685	-0.0347292	0.0195172	0.028381		0.00634667	0.0976219	-0.053195	0.0169245	0.0438572
-2.05882	0	0.0349909	0.0299765	-0.0377475	0.00907327	0.0234551		0.0381859	0.0981398	-0.0635744	0.0242504	0.0472
-1.91176	0	-0.0467603	0.0268598	-0.0436914	-0.0211973	0.0240449		-0.00585023	0.0937002	-0.0707817	0.00568944	0.0478311
-1.76471	0	-0.0238786	0.00259132	-0.0459842	-0.0224238	0.0140414		-0.00746261	0.0940174	-0.0743478	0.00406897	0.0489437
-1.61765	0	-0.0711051	-0.0208903	-0.0391559	-0.0437171	0.0146741		0.0621509	0.117785	-0.0759318	0.0346679	0.0575847
-1.47059	0	-0.0855101	-0.020828	-0.0330607	-0.0464662	0.0198387		0.0568196	0.101315	-0.0649218	0.0310708	0.0496853
-1.32353	0	-0.0566568	-0.0180868	-0.0293398	-0.0346945	0.0114516		-0.0601624	0.0899135	-0.0611467	-0.0104652	0.0501902
-1.17647	0	-0.0790824	-0.0318967	-0.0302778	-0.0470857	0.0160052		-0.0744481	0.14883	-0.0687724	0.00186971	0.0734982
-1.02941	0	-0.0639934	-0.0410785	-0.0363315	-0.0471345	0.00854014		-0.0455065	0.125319	-0.0835011	-0.00122943	0.064218
-0.882353	0	-0.0801741	-0.0115856	-0.03661	-0.0427899	0.0200395		-0.082642	0.0868801	-0.0830196	-0.0262605	0.0565704
-0.735294	0	-0.0368889	-0.0533704	-0.03241	-0.0408898	0.00637284		-0.0219648	0.113787	-0.0743417	0.00582679	0.0560576
-0.588235	0	-0.0129356	-0.00532641	-0.0200049	-0.0127556	0.00423828		-0.0343947	0.114801	-0.0513947	0.00967054	0.0527938
-0.441176	0	0.021247	-0.0181526	-0.0184235	-0.0051097	0.0131786		-0.102959	0.113117	-0.0415829	-0.0104749	0.0642856
-0.294118	0	-0.0102739	0.00751486	-0.0177405	-0.00683318	0.00749082		-0.126984	0.137223	-0.0540284	-0.0145965	0.078777
-0.147059	0	-0.0401424	0.0269872	-0.0209065	-0.0113539	0.0199586		0.00895138	0.127927	-0.0616242	0.0250846	0.05531
0	1	0.0356654	0.0216653	-0.0187159	0.0128716	0.0163026		0.00912885	0.055128	-0.0567359	0.00250699	0.0324616
0.147059	1	0.0238516	0.0107217	-0.0102881	0.00809504	0.00994241		0.0268521	0.078042	-0.0426384	0.0207519	0.0349707
0.294118	1	0.0443682	-0.0110213	-0.00367991	0.009889	0.0173694		0.0304631	0.0690366	-0.0240015	0.0251661	0.0269881
0.441177	1	0.0364548	0.0222026	0.000805866	0.0198211	0.0103596		-0.0109195	0.00454799	-0.00768524	-0.00468558	0.00471024
0.588235	1	-0.002063	-0.0266049	-0.00535914	-0.0113424	0.00769038		0.0466164	-0.0249234	-0.0160541	0.0018796	0.0225144
0.735294	1	0.111563	0.00710641	-0.00918852	0.0364936	0.0378283		0.171316	0.000779484	-0.0267504	0.0484484	0.0619457
0.882353	1	0.198134	0.0357517	-0.00150692	0.0774598	0.0612885		0.267687	0.0427371	-0.00704989	0.101125	0.084512
1.02941	1	0.435298	0.0811564	0.0201891	0.178881	0.129411		0.286581	0.067348	0.0264471	0.126792	0.0807621
1.17647	1	0.543865	0.199004	0.0463094	0.26306	0.147159		0.471436	0.219075	0.0541588	0.248223	0.121336
1.32353	1	0.781917	0.264206	0.0665658	0.370896	0.213283		0.556681	0.254546	0.0788687	0.296699	0.139533
1.47059	1	0.895716	0.341153	0.0812889	0.439386	0.240181		0.822354	0.434696	0.0933565	0.450136	0.210585
1.61765	1	1.15504	0.424645	0.097265	0.558984	0.312654		1.00961	0.549942	0.102123	0.553891	0.261976
1.76471	1	1.3581	0.487745	0.114012	0.653285	0.368552		1.10233	0.607224	0.116339	0.608629	0.284631
1.91176	1	1.49664	0.521206	0.142456	0.720099	0.403369		1.06915	0.646207	0.15687	0.624076	0.263586
2.05882	1	1.62806	0.502129	0.156373	0.762189	0.444294		1.11864	0.682127	0.168479	0.656415	0.274589
2.20588	1	1.56725	0.513121	0.15374	0.744703	0.424155		1.16369	0.76614	0.164396	0.698075	0.290472
2.35294	1	1.56201	0.483078	0.138527	0.727872	0.428765		1.06534	0.683623	0.159744	0.636236	0.262495
2.5	1	1.37419	0.508307	0.126819	0.669773	0.369025		1.08011	0.743675	0.138822	0.654202	0.275384
2.64706	1	1.364	0.481278	0.121099	0.655457	0.369212		0.964153	0.632989	0.135093	0.577412	0.240937
2.79412	1	1.27206	0.429489	0.115201	0.605585	0.34537		0.856127	0.610707	0.126302	0.531045	0.214415
2.94118	1	1.27519	0.41897	0.117088	0.603749	0.346846		0.794729	0.68506	0.139696	0.539829	0.202555
3.08824	1	1.15204	0.428886	0.111952	0.564293	0.307787		0.859298	0.729559	0.140316	0.576391	0.221231
3.23529	0	1.16252	0.446682	0.104441	0.571213	0.311722		0.746235	0.680769	0.131659	0.519554	0.194866
3.38235	0	1.11021	0.41612	0.0933829	0.539906	0.299988		0.762919	0.618734	0.11504	0.498898	0.19639
3.52941	0	1.12152	0.414143	0.0909486	0.542204	0.304313		0.718747	0.569575	0.0975325	0.461951	0.187229
3.67647	0	1.28717	0.337705	0.0923187	0.572399	0.364339		0.684762	0.489962	0.108057	0.427594	0.169376
3.82353	0	1.33386	0.354159	0.0994185	0.595811	0.376278		0.599715	0.479616	0.11034	0.396557	0.147248
3.97059	0	1.21704	0.333202	0.0967596	0.549001	0.340923		0.608948	0.498336	0.10481	0.404031	0.15298
4.11765	0	1.17616	0.340181	0.0801468	0.532162	0.330633		0.616337	0.447118	0.0780255	0.380493	0.158928
4.26471	0	1.20185	0.316459	0.0679474	0.528753	0.34411		0.530915	0.357636	0.0492547	0.312602	0.140855
4.41176	0	1.23472	0.276427	0.0629168	0.524688	0.360326		0.603699	0.389308	0.0394602	0.344156	0.164439
4.55882	0	1.28133	0.282944	0.0706383	0.544972	0.373246		0.564765	0.439127	0.0558033	0.353232	0.153073
4.70588	0	1.15765	0.23576	0.0781002	0.490504	0.336664		0.585898	0.473324	0.0720902	0.377104	0.155931
4.85294	0	1.05894	0.25526	0.0723769	0.462192	0.303008		0.602871	0.428896	0.0631349	0.364968	0.159053
5	0	1.0229	0.228098	0.0634892	0.438163	0.296206		0.540059	0.492293	0.0470011	0.359784	0.156998
5.14706	0	1.05809	0.241107	0.0632975	0.454165	0.306294		0.678917	0.525987	0.0375058	0.414137	0.193421
5.29412	0	1.02995	0.245277	0.0736952	0.449641	0.294352		0.657987	0.568216	0.0458884	0.42403	0.190839
5.44118	0	1.07542	0.222089	0.0854345	0.460982	0.309743		0.653805	0.640449	0.062641	0.452298	0.194867
5.58824	0	0.997885	0.231567	0.09377	0.441074	0.281233		0.609717	0.628259	0.0748055	0.437594	0.181473
5.73529	0	0.965331	0.227053	0.0958791	0.429421	0.270618		0.601156	0.572502	0.0759818	0.416547	0.170483
5.88235	0	0.999719	0.268223	0.0940769	0.454006	0.277449		0.557021	0.614596	0.0744756	0.415364	0.171253
6.02941	0	0.927607	0.291662	0.0975029	0.438924	0.250688		0.54592	0.687017	0.0885559	0.440497	0.180623
6.17647	0	0.973845	0.281312	0.109693	0.45495	0.264135		0.683256	0.65851	0.117956	0.486574	0.184447
6.32353	0	0.87556	0.279444	0.12644	0.427148	0.228515		0.491888	0.612393	0.153393	0.419225	0.137393
6.47059	0	0.783065	0.288033	0.13636	0.402486	0.195262		0.531971	0.584387	0.16717	0.427842	0.131212
6.61765	0	0.603989	0.356651	0.133586	0.364742	0.135854		0.54969	0.536079	0.167586	0.417785	0.125161
6.76471	0	0.571115	0.377595	0.130929	0.35988	0.127379		0.614404	0.547146	0.167569	0.44304	0.139097
6.91176	0	0.587081	0.359532	0.133531	0.360048	0.130929		0.558968	0.581644	0.158354	0.432989	0.137473
7.05882	0	0.582781	0.31839	0.139189	0.346787	0.128839		0.634015	0.597065	0.158491	0.46319	0.152723
7.20588	0	0.565087	0.283952	0.150933	0.333324	0.122078		0.55087	0.519843	0.167288	0.412667	0.123016
7.35294	0	0.468474	0.295715	0.149142	0.304443	0.0922866		0.499634	0.49575	0.148327	0.381237	0.11646
7.5	0	0.497394	0.30787	0.134241	0.313168	0.104867		0.490326	0.45474	0.128783	0.35795	0.115043
7.64706	0	0.530511	0.296741	0.121093	0.316115	0.118585		0.405117	0.398197	0.10835	0.303888	0.0977895
7.79412	0	0.525311	0.252867	0.12032	0.299499	0.119213		0.368395	0.356265	0.0963076	0.273656	0.0887433
7.94118	0	0.511972	0.238916	0.127061	0.29265	0.114316		0.378584	0.322408	0.106947	0.269313	0.0827869
8.08824	0	0.418305	0.221409	0.135323	0.258346	0.0837516		0.400022	0.237322	0.117752	0.251699	0.0818006
8.23529	0	0.42917	0.246545	0.129757	0.268491	0.0871269		0.303502	0.169343	0.113823	0.195556	0.0563024
8.38235	0	0.49442	0.243388	0.118122	0.28531	0.110632		0.331838	0.215047	0.0884899	0.211792	0.0702675
8.52941	0	0.506875	0.230367	0.110557	0.2826	0.11735		0.276799	0.200475	0.0761587	0.184478	0.0584697
8.67647	0	0.487953	0.196821	0.117101	0.267292	0.112705		0.312894	0.194863	0.0735227	0.19376	0.0691028
8.82353	0	0.422583	0.169852	0.13004	0.240825	0.0916028		0.282031	0.199803	0.10061	0.194148	0.0524481
8.97059	0	0.38436	0.16703	0.136921	0.229437	0.0779475		0.295675	0.21939	0.116747	0.210604	0.0518387
9.11765	0	0.326943	0.140924	0.138906	0.202258	0.0623454		0.204792	0.177947	0.0984928	0.160411	0.0319141
9.26471	0	0.30798	0.167676	0.12873	0.201462	0.0544327		0.175386	0.241855	0.0960354	0.171092	0.0421491
9.41176	0	0.24763	0.148865	0.130145	0.175546	0.0364447		0.293499	0.228228	0.0972906	0.206339	0.0576883
9.55882	0	0.14109	0.156244	0.138482	0.145272	0.00553736		0.324923	0.186487	0.109882	0.207098	0.0629265
9.70588	0	0.102818	0.163119	0.150632	0.138856	0.0183762		0.319693	0.174242	0.138029	0.210655	0.0555124
9.85294	0	0.106185	0.151403	0.155833	0.137807	0.0158628		0.320357	0.214094	0.149456	0.227969	0.0498205
10	0	0.178479	0.149362	0.150863	0.159568	0.00946554		0.371671	0.208481	0.129932	0.236695	0.0711956
10.1471	0	0.174323	0.140928	0.144274	0.153175	0.0106183		0.272394	0.251735	0.116303	0.213477	0.0489518
10.2941	0	0.15637	0.145179	0.140666	0.147405	0.00466791		0.275476	0.290003	0.118861	0.228113	0.0547868
10.4412	0	0.174629	0.143139	0.144631	0.154133	0.010257		0.284543	0.271277	0.120373	0.225398	0.0526518
10.5882	0	0.165306	0.150218	0.153019	0.156181	0.00463359		0.216882	0.266784	0.138144	0.20727	0.0374447
10.7353	0	0.251174	0.15294	0.156648	0.18692	0.0321445		0.136081	0.303773	0.146727	0.195527	0.0542103
10.8824	0	0.195116	0.115972	0.148134	0.153074	0.02298		0.189515	0.341	0.135477	0.221997	0.0615122
11.0294	0	0.178446	0.131434	0.13931	0.14973	0.0145369		0.148917	0.282734	0.127953	0.186535	0.048479
11.1765	0	0.157908	0.113528	0.139863	0.1371	0.0128857		0.123456	0.294657	0.134296	0.184136	0.0553489
11.3235	0	0.12485	0.127363	0.143885	0.132033	0.00597036		0.192961	0.203889	0.158714	0.185188	0.0136076
11.4706	0	0.150861	0.138364	0.152305	0.147177	0.00442588		0.16525	0.239668	0.182633	0.19585	0.0224759
11.6176	0	0.0818565	0.128215	0.155353	0.121808	0.0214572		0.110411	0.232784	0.183546	0.17558	0.0355498
11.7647	0	0.0404186	0.110249	0.144312	0.0983264	0.0305781		0.0285476	0.265262	0.163274	0.152361	0.0685509
11.9118	0	-0.0194792	0.128568	0.130461	0.0798497	0.0496675		0.0933441	0.275457	0.144929	0.171243	0.0541928
12.0588	0	-0.0511267	0.132203	0.131084	0.0707201	0.0609243		0.0355017	0.259079	0.14054	0.14504	0.0645805
12.2059	0	-0.0389726	0.161207	0.13503	0.0857547	0.0628198		0.00208582	0.314032	0.149363	0.15516	0.0900977
12.3529	0	-0.0708735	0.191032	0.137185	0.0857811	0.0798548		0.0375573	0.308074	0.154236	0.166622	0.0783366
12.5	0	0.0192066	0.205354	0.135738	0.1201	0.0543021		0.069033	0.373499	0.138426	0.193653	0.0921275
12.6471	0	-0.023915	0.21049	0.124277	0.103617	0.0684507		0.0718039	0.319544	0.115234	0.168861	0.0763776
12.7941	0	0.0201065	0.225466	0.11429	0.119954	0.0593496		0.0561345	0.38452	0.0995787	0.180078	0.102988
12.9412	0	0.0312282	0.222297	0.119086	0.124204	0.0552162		0.123896	0.359466	0.0930146	0.192126	0.0841437
13.0882	0	0.0936493	0.181814	0.130301	0.135255	0.0255712		0.0565074	0.341804	0.105789	0.168034	0.0880424
13.2353	0	0.138689	0.174155	0.132673	0.148506	0.0129418		0.0642046	0.361153	0.116941	0.180767	0.0914693
13.3824	0	0.229517	0.170405	0.126007	0.175309	0.0299814		0.0921774	0.305482	0.0995833	0.165748	0.0698999
13.5294	0	0.258169	0.177529	0.115252	0.18365	0.04137		0.0656891	0.271272	0.0784294	0.138463	0.066506
13.6765	0	0.275421	0.139585	0.104951	0.173319	0.0520207		0.0171497	0.202965	0.05476	0.0916249	0.0567188
13.8235	0	0.284346	0.140084	0.103797	0.176076	0.0551393		0.0212146	0.24234	0.0551412	0.106232	0.0687552
13.9706	0	0.282971	0.110306	0.106491	0.166589	0.0582014		0.0962918	0.17829	0.0690747	0.114552	0.0328232
14.1176	0	0.311903	0.120146	0.103512	0.17852	0.066864		0.0460389	0.147997	0.078088	0.090708	0.0301016
14.2647	0	0.261959	0.133495	0.0925074	0.162654	0.051043		0.0343738	0.17249	0.0566303	0.0878313	0.0428141
14.4118	0	0.251513	0.148702	0.0846942	0.161636	0.0485887		-0.000171865	0.160449	0.027006	0.0624276	0.0496345
14.5588	0	0.168765	0.123413	0.0830828	0.125087	0.0247485		-0.0367416	0.172096	0.0243547	0.0532365	0.0619918
14.7059	0	0.134036	0.0980456	0.0840591	0.10538	0.0148859		-0.032078	0.157196	0.0318083	0.0523086	0.0555917
14.8529	0	0.168189	0.0951467	0.0865854	0.11664	0.0258925		0.00402962	0.190221	0.0448572	0.0797028	0.0565022
15	0	0.192387	0.0982731	0.0822608	0.124307	0.0343526		0.0302307	0.17804	0.0481566	0.0854757	0.0465704
15.1471	0	0.18149	0.154783	0.0712656	0.135846	0.0331979		-0.00064237	0.199769	0.0275234	0.0755499	0.0626393
15.2941	0	0.148893	0.150914	0.0631628	0.12099	0.0289196		-0.0254774	0.22028	0.00646909	0.0670906	0.077148
15.4412	0	0.091408	0.140668	0.0602422	0.0974393	0.0234119		0.0329055	0.192951	0.00867139	0.0781759	0.0578123
15.5882	0	0.0607993	0.153083	0.0642733	0.0927185	0.0301989		0.0576819	0.180676	0.0222089	0.0868557	0.048015
15.7353	0	0.00832006	0.132871	0.0672848	0.069492	0.0359717		0.126861	0.215917	0.0202789	0.121019	0.0565514
15.8824	0	0.0292169	0.126196	0.0654942	0.0736358	0.02829		0.110609	0.270709	0.0163599	0.132559	0.0742401
16.0294	0	-0.0237507	0.14904	0.0591448	0.0614781	0.0498941		0.0819794	0.335829	0.0105683	0.142792	0.0986954
16.1765	0	-0.0231873	0.156957	0.0569578	0.063576	0.0521085		0.0470505	0.315701	-0.0076856	0.118355	0.0999299
16.3235	0	-0.00839985	0.119678	0.059687	0.0569883	0.0369974		0.0768172	0.273954	-0.00404249	0.115576	0.0825575
16.4706	0	-0.0217046	0.117384	0.0629225	0.0528672	0.0404649		0.10455	0.309607	0.00706514	0.140407	0.0891574
16.6176	0	0.0148827	0.11584	0.066299	0.0656738	0.0291454		0.139076	0.294075	0.0108378	0.147996	0.0818852
16.7647	0	0.0491766	0.0800844	0.0563926	0.0618845	0.00933532		0.120813	0.306794	-0.00177428	0.141944	0.0897006
16.9118	0	0.0908189	0.0891833	0.0444581	0.0748201	0.0151883		0.142399	0.257776	-0.0193809	0.126932	0.0803813
17.0588	0	0.0619992	0.097143	0.0338219	0.0643214	0.0183161		0.138715	0.229676	-0.033726	0.111555	0.0772409
17.2059	0	0.0226765	0.0614162	0.0357807	0.0399578	0.0113765		0.111294	0.208365	-0.037147	0.0941707	0.0713885
17.3529	0	0.0112545	0.0271003	0.0413483	0.0265677	0.0086914		0.150256	0.20271	-0.0261271	0.108946	0.0692134
17.5	0	0.0162168	0.0192346	0.0395873	0.0250129	0.00733909		0.12314	0.216759	-0.0291291	0.10359	0.0716518
17.6471	0	0.0734986	0.00386075	0.0338011	0.0370535	0.0201684		0.174564	0.17971	-0.040451	0.104607	0.0725445
17.7941	0	0.117687	0.0312992	0.0259505	0.0583122	0.0297274		0.163713	0.198718	-0.0560972	0.102111	0.0797471
17.9412	0	0.0963036	0.0752174	0.0207675	0.0640962	0.0225032		0.157165	0.170619	-0.0651427	0.0875469	0.0764435
18.0882	0	0.0953823	0.0835054	0.0253531	0.0680802	0.0216369		0.0763204	0.162948	-0.0534607	0.061936	0.0628846
18.2353	0	0.134861	0.0728157	0.0357711	0.0811492	0.0289066		0.100449	0.182584	-0.0394197	0.0812043	0.0648053
18.3824	0	0.166558	0.0821124	0.0384271	0.095699	0.0376068		0.133088	0.164587	-0.0337977	0.0879592	0.0615538
18.5294	0	0.215316	0.114385	0.0319635	0.120555	0.053019		0.192276	0.176125	-0.0354881	0.110971	0.0733778
18.6765	0	0.226993	0.137919	0.0250187	0.129977	0.05844		0.179307	0.2359	-0.0265303	0.129559	0.079736
18.8235	0	0.215613	0.131419	0.0245024	0.123845	0.0552987		0.0979823	0.230273	-0.0272212	0.100345	0.0743417
18.9706	0	0.149105	0.0783924	0.0297459	0.0857478	0.0346517		0.0415983	0.241631	-0.00351425	0.0932384	0.0753306
19.1176	0	0.212069	0.0714248	0.0464257	0.109973	0.0515555		0.0670795	0.237028	0.0222039	0.10877	0.0654242
19.2647	0	0.217512	0.0572113	0.0490753	0.107933	0.0548398		0.141114	0.266762	0.0290653	0.145647	0.0686545
19.4118	0	0.219073	0.0934357	0.0425649	0.118358	0.0524551		0.0854034	0.291853	0.026133	0.134463	0.0805334
19.5588	0	0.189611	0.0808606	0.0378555	0.102776	0.0451577		0.0538453	0.305943	0.0240859	0.127958	0.0894061
19.7059	0	0.101038	0.0607475	0.0392155	0.0670002	0.0181183		-0.0771001	0.323	0.0209363	0.0889453	0.120401
19.8529	0	0.0590359	0.0026753	0.0525774	0.0380962	0.0178083		-0.0820215	0.263379	0.0338665	0.0717415	0.101491
20	0	0.0617333	0.00431616	0.0638285	0.0432927	0.0194976		-0.0288771	0.247589	0.0627248	0.0938124	0.0813086
20.1471	0	0.0842108	0.0427289	0.0657225	0.0642207	0.0119983		0.033068	0.223027	0.0613701	0.105822	0.0591693
20.2941	0	0.0707366	0.0364025	0.0562559	0.054465	0.00995176		0.0722651	0.278596	0.0459216	0.132261	0.0735616
20.4412	0	0.0159556	0.0748507	0.0493045	0.0467036	0.0170512		-0.000710556	0.262143	0.0329846	0.098139	0.0825769
20.5882	0	-0.0137867	0.0551833	0.05458	0.0319922	0.0228901		0.0237469	0.189581	0.0363247	0.0832175	0.0533055
20.7353	0	-0.0278622	0.0620719	0.0597788	0.0313295	0.0296032		0.106432	0.126058	0.046597	0.093029	0.0238974
20.8824	0	0.035601	0.0688412	0.0617797	0.0554073	0.0101108		0.13832	0.101688	0.0627154	0.100908	0.0218286
21.0294	0	0.0476705	0.123534	0.0517635	0.0743227	0.024634		0.165179	0.101615	0.0500376	0.105611	0.0332983
21.1765	0	0.0993062	0.15603	0.0342051	0.0965139	0.0351956		0.209485	0.149116	0.0191713	0.125924	0.0561491
21.3235	0	0.131293	0.154527	0.0228771	0.102899	0.0405693		0.187777	0.147212	0.000531622	0.11184	0.0568728
21.4706	0	0.132471	0.142478	0.0193966	0.0981152	0.0394652		0.149635	0.100049	-0.00271183	0.082324	0.0448628
21.6176	0	0.159755	0.117073	0.0307905	0.10254	0.0379315		0.208307	0.0957019	0.00848288	0.104164	0.0578393
21.7647	0	0.142994	0.0968345	0.0291188	0.0896492	0.0330688		0.263711	0.164192	0.00699651	0.144967	0.074728
21.9118	0	0.126635	0.100638	0.0225317	0.0832682	0.0312818		0.191968	0.201328	-0.00565517	0.129214	0.0674885
22.0588	0	0.129635	0.110496	0.011449	0.08386	0.0366247		0.218387	0.220179	-0.0237467	0.138273	0.0810115
22.2059	0	0.106262	0.099186	0.0137261	0.0730581	0.0297363		0.254985	0.22532	-0.0317404	0.149521	0.0910345
22.3529	0	0.0686666	0.0748386	0.0267272	0.0567441	0.0151139		0.211298	0.161707	-0.0143081	0.119566	0.0684506
22.5	0	0.0613766	0.0578294	0.0420237	0.0537432	0.00594856		0.250529	0.20407	0.0103797	0.154993	0.0735399
22.6471	0	-0.00531339	0.0633562	0.0481429	0.0353952	0.0208227		0.255362	0.194859	0.0191814	0.156468	0.0708302
22.7941	0	0.00713494	0.0671789	0.0436855	0.0393331	0.0174693		0.231643	0.218325	0.01823	0.156066	0.0690252
22.9412	0	0.0955847	0.100123	0.0433454	0.0796843	0.0182166		0.183785	0.202735	0.0162683	0.134263	0.0592503
23.0882	0	0.103418	0.119017	0.0471848	0.089873	0.021814		0.191883	0.224426	0.0203091	0.145539	0.063316
23.2353	0	0.0504887	0.0802261	0.0598502	0.0635217	0.00877854		0.204357	0.21018	0.026596	0.147044	0.0602477
23.3824	0	0.102658	0.0682313	0.0678074	0.0795656	0.0115469		0.166633	0.208986	0.0383094	0.137976	0.0513113
23.5294	0	0.0911585	0.0714542	0.0614828	0.0746985	0.00871887		0.150364	0.266626	0.0349453	0.150645	0.0668807
23.6765	0	0.0779733	0.0968339	0.0488774	0.0745615	0.0139485		0.050011	0.252004	0.0144512	0.105489	0.0739734
23.8235	0	0.0962666	0.0958006	0.0391955	0.0770876	0.0189465		0.0642235	0.285366	0.00493649	0.118175	0.0853292
23.9706	0	0.114579	0.0889944	0.0335482	0.0790405	0.0239152		0.0586752	0.270605	0.00439717	0.111226	0.0812153
24.1176	0	0.0664401	0.0630234	0.0364568	0.0553067	0.00947644		0.134029	0.25296	0.0102222	0.132404	0.0700772
24.2647	0	0.160836	0.0520852	0.0402707	0.0843974	0.0383713		0.198495	0.20548	0.0177653	0.14058	0.0614404
24.4118	0	0.170188	0.0576087	0.0339022	0.087233	0.0420383		0.16766	0.172942	0.00946418	0.116689	0.053634
24.5588	0	0.185099	0.0593742	0.0251891	0.0898875	0.0486179		0.161611	0.207637	-0.000678194	0.122857	0.0631803
24.7059	0	0.17813	0.0655009	0.0243251	0.0893188	0.0459692		0.175234	0.210474	-0.0116343	0.124691	0.0689178
24.8529	0	0.168914	0.0630259	0.0302863	0.0874089	0.0418344		0.203127	0.20506	-0.00407035	0.134706	0.0693902
25	0	0.234375	0.049479	0.0435011	0.109118	0.062652		0.198232	0.144655	0.00641661	0.116435	0.0571419
25.1471	0	0.252364	0.0552637	0.0495853	0.119071	0.0666668		0.233961	0.169729	0.0136608	0.139117	0.0654113
25.2941	0	0.241231	0.0671953	0.0449117	0.117779	0.06206		0.195598	0.166065	0.0113089	0.124324	0.057147
25.4412	0	0.267244	0.0664095	0.0341654	0.122606	0.0729153		0.20581	0.219459	0.000205112	0.141825	0.0709194
25.5882	0	0.297778	0.0952313	0.0328422	0.141951	0.0799684		0.249222	0.303207	-0.00606594	0.182121	0.0953752
25.7353	0	0.277346	0.107739	0.0353855	0.140157	0.0717039		0.352851	0.285166	0.000598263	0.212872	0.10792
25.8824	0	0.263896	0.0963723	0.040933	0.133734	0.06702		0.337947	0.245888	0.0219579	0.201931	0.0938285
26.0294	0	0.29317	0.101892	0.042983	0.146015	0.075517		0.339853	0.209239	0.0281834	0.192425	0.0903632
26.1765	0	0.304759	0.0957137	0.032734	0.144402	0.0822138		0.320715	0.229025	0.0253887	0.191709	0.0872711
26.3235	0	0.328515	0.103054	0.0248473	0.152139	0.0910322		0.24183	0.250444	0.0147039	0.168993	0.0771844
26.4706	0	0.356047	0.110305	0.027317	0.164556	0.0986971		0.236366	0.247331	0.00670178	0.163466	0.0784461
26.6176	0	0.261725	0.104502	0.0409181	0.135715	0.0656241		0.151222	0.239959	0.0183704	0.136517	0.0643882
26.7647	0	0.262548	0.0868907	0.0513003	0.13358	0.0652974		0.124059	0.193754	0.0439263	0.12058	0.0432864
26.9118	0	0.269767	0.08331	0.0555492	0.136209	0.0672582		-0.0144456	0.164546	0.0506316	0.0669106	0.0523076
27.0588	0	0.280543	0.095098	0.0535072	0.143049	0.0697873		-0.0181219	0.185672	0.0393404	0.0689635	0.0606662
27.2059	0	0.328105	0.0962239	0.0496883	0.158006	0.0861042		-0.0218739	0.267073	0.0260294	0.0904095	0.0894076
27.3529	0	0.27886	0.130738	0.0575328	0.15571	0.0651003		-0.0252005	0.310154	0.0261585	0.103704	0.104284
27.5	0	0.294333	0.113653	0.0701822	0.159389	0.0686289		-0.0131626	0.24715	0.0429215	0.0923029	0.0790981
27.6471	0	0.286912	0.106033	0.0763598	0.156435	0.0657984		-0.0210595	0.279109	0.049967	0.102672	0.0905698
27.7941	0	0.337099	0.0920208	0.069408	0.166176	0.0857103		-0.0170807	0.267142	0.0414608	0.0971741	0.086648
27.9412	0	0.316763	0.10946	0.0624798	0.162901	0.0781174		0.0309312	0.303995	0.0241847	0.119704	0.0921662
28.0882	0	0.321284	0.112956	0.0556802	0.163307	0.0807006		0.0652568	0.33508	0.00438371	0.134907	0.101618
28.2353	0	0.290873	0.0954157	0.0546978	0.146996	0.0728928		0.132942	0.342799	0.0107593	0.162167	0.0969592
28.3824	0	0.232349	0.062578	0.0605258	0.118484	0.0569354		0.129118	0.268937	0.0208841	0.139646	0.0717999
28.5294	0	0.227245	0.0520569	0.0664026	0.115235	0.0561581		0.162746	0.277502	0.027762	0.156003	0.0721725
28.6765	0	0.187409	0.0496724	0.0593222	0.0988013	0.0443915		0.156348	0.317152	0.0171486	0.163549	0.0866782
28.8235	0	0.188329	0.0358916	0.0516465	0.0919556	0.0484007		0.134363	0.261616	0.00601013	0.133996	0.0737874
28.9706	0	0.14404	0.0631507	0.0523235	0.0865048	0.028937		0.131823	0.265084	0.00104833	0.132652	0.0762218
29.1176	0	0.194271	0.0526405	0.0517401	0.0995504	0.0473608		0.0589523	0.252792	0.00561117	0.105785	0.0750989
29.2647	0	0.178113	0.0404772	0.0592894	0.0926264	0.0430867		0.0281307	0.214614	0.0234745	0.0887398	0.0629516
29.4118	0	0.174247	0.0325273	0.0652475	0.0906741	0.0428409		-0.0466469	0.193412	0.0319872	0.059584	0.0706593
29.5588	0	0.217864	0.0452994	0.0570315	0.106732	0.0556692		0.0296789	0.198404	0.0232694	0.0837839	0.0573397
29.7059	0	0.245905	0.0422137	0.0402941	0.109471	0.0682193		-0.0185309	0.134669	0.0118456	0.0426611	0.0468321
29.8529	0	0.219256	0.0846568	0.0329064	0.112273	0.0555383		-0.025121	0.154597	0.00148715	0.0436543	0.0560005
30	0	0.270565	0.105389	0.0334115	0.136455	0.0702002		0.0208531	0.20758	0.0176749	0.0820361	0.0627788
30.1471	0	0.206282	0.0838385	0.0337862	0.107969	0.051236		0.0554013	0.202082	0.0354889	0.0976574	0.0525278
30.2941	0	0.189417	0.0697621	0.0366109	0.0985966	0.0464076		0.107289	0.154722	0.0399546	0.100655	0.0332961
30.4412	0	0.176596	0.0611122	0.0252139	0.0876408	0.045669		0.253375	0.16297	0.0319408	0.149429	0.06428
30.5882	0	0.312305	0.0975894	0.0157111	0.141869	0.0884355		0.296957	0.180775	0.00478324	0.160838	0.0849303
30.7353	0	0.264725	0.132884	0.0175446	0.138384	0.0714078		0.250107	0.184771	0.012757	0.149212	0.0707863
30.8824	0	0.280932	0.133237	0.0256396	0.146603	0.0739991		0.289338	0.216204	0.028917	0.178153	0.0775471
31.0294	0	0.355384	0.108203	0.0286923	0.164093	0.0983611		0.309808	0.21371	0.034924	0.186147	0.08054
31.1765	0	0.29345	0.0886845	0.0245464	0.13556	0.0810871		0.291395	0.192421	0.030072	0.171296	0.0761732
31.3235	0	0.390641	0.0652425	0.0203062	0.15873	0.116679		0.352785	0.137284	0.00758384	0.165884	0.100672
31.4706	0	0.402094	0.0731055	0.0111337	0.162111	0.121318		0.363152	0.0875612	-0.0131179	0.145865	0.112464
31.6176	0	0.423036	0.10804	0.0133077	0.181461	0.123844		0.301657	0.103955	-0.0127028	0.13097	0.0917474
31.7647	0	0.340482	0.103875	0.0169331	0.153763	0.0966741		0.340644	0.0770169	0.00221679	0.139959	0.102639
31.9118	0	0.377038	0.066892	0.0180374	0.153989	0.112413		0.327766	0.0326629	0.0067363	0.122388	0.102961
32.0588	0	0.294913	0.0563539	0.0106867	0.120651	0.0881227		0.344552	0.0235088	-0.0100125	0.119349	0.113016
32.2059	0	0.254732	0.0312913	0.00948604	0.0985031	0.0783676		0.345403	0.013837	-0.013426	0.115272	0.115335
32.3529	0	0.29577	0.0592661	0.0012456	0.118761	0.0900757		0.328349	0.00257955	-0.0252075	0.101907	0.113505
32.5	0	0.292281	0.0938262	0.000397487	0.128835	0.0860585		0.293545	0.0498154	-0.0233413	0.106673	0.0957928
32.6471	0	0.255387	0.0870461	0.00614597	0.116193	0.0734109		0.288311	0.0598675	-0.0106685	0.112503	0.0902315
32.7941	0	0.25444	0.0211897	0.00381755	0.093149	0.0808011		0.260059	0.0152945	-0.0176809	0.0858909	0.0876029
32.9412	0	0.250873	0.028789	-0.000562253	0.0930332	0.0793734		0.219732	0.0428983	-0.029487	0.0777146	0.0740196
33.0882	0	0.266758	0.0383946	-0.0103756	0.0982589	0.0854177		0.263073	0.11749	-0.0557444	0.108273	0.0921499
33.2353	0	0.339597	0.0271577	-0.0153393	0.117138	0.111904		0.285017	0.113429	-0.0625073	0.11198	0.100324
33.3824	0	0.326543	0.0376498	-0.017878	0.115438	0.106762		0.287189	0.111432	-0.0607096	0.112637	0.100431
33.5294	0	0.363841	0.0349019	-0.0121684	0.128858	0.118275		0.332399	0.12125	-0.0691191	0.128176	0.11596
33.6765	0	0.369843	0.0251128	-0.0183949	0.12552	0.122805		0.286162	0.146001	-0.0780069	0.118052	0.106051
33.8235	0	0.352184	0.0243136	-0.0261441	0.116785	0.118598		0.252228	0.22436	-0.0912824	0.128435	0.110153
33.9706	0	0.418613	0.0571383	-0.0318915	0.147953	0.137749		0.25226	0.202848	-0.109011	0.115366	0.113092
34.1176	0	0.398698	0.0572031	-0.0404106	0.138497	0.133117		0.236452	0.177908	-0.122641	0.0972396	0.111232
34.2647	0	0.357612	0.0321505	-0.0370487	0.117571	0.121671		0.188874	0.210957	-0.118107	0.0939082	0.106199
34.4118	0	0.39768	0.0446728	-0.0314397	0.136971	0.132193		0.128469	0.222676	-0.115934	0.0784036	0.100903
34.5588	0	0.402789	0.0530422	-0.032744	0.141029	0.133202		0.135044	0.136349	-0.129527	0.047289	0.0884087
34.7059	0	0.358785	0.0399123	-0.0378183	0.120293	0.121339		0.100849	0.145546	-0.129706	0.0388963	0.0852831
34.8529	0	0.33133	0.0366328	-0.0388634	0.1097	0.112938		0.134046	0.0922857	-0.130895	0.0318123	0.0822419
35	0	0.336122	0.0676928	-0.0405547	0.121087	0.111967		0.132964	0.0735756	-0.131421	0.0250395	0.0800866
35.1471	0	0.225721	0.0705303	-0.0386379	0.0858711	0.0766984		0.172852	0.17595	-0.116658	0.0773812	0.0970239
35.2941	0	0.295686	0.0447097	-0.0337249	0.102224	0.0993458		0.127609	0.18116	-0.106732	0.0673456	0.0884008
35.4412	0	0.351434	0.0859813	-0.0371145	0.133434	0.114646		0.153071	0.114976	-0.109912	0.0527117	0.0820521
35.5882	0	0.347081	0.0650698	-0.0413281	0.123607	0.115881		0.196926	0.0989763	-0.117006	0.0596322	0.0927348
35.7353	0	0.31554	0.0490941	-0.0483677	0.105422	0.108761		0.204839	0.147847	-0.119157	0.077843	0.0998646
35.8824	0	0.325359	0.0653272	-0.0463553	0.114777	0.110116		0.202369	0.177282	-0.117894	0.087252	0.102829
36.0294	0	0.347251	0.0890593	-0.0438168	0.130831	0.114807		0.192856	0.222203	-0.109518	0.101847	0.106022
36.1765	0	0.43966	0.0685516	-0.0386968	0.156505	0.144923		0.250897	0.220638	-0.111652	0.119961	0.116135
36.3235	0	0.427093	0.0799901	-0.0368897	0.156731	0.139328		0.191769	0.16689	-0.108514	0.0833817	0.0962161
36.4706	0	0.38406	0.0683751	-0.0414674	0.136989	0.12754		0.225735	0.142373	-0.113369	0.0849131	0.10202
36.6176	0	0.350927	0.0588084	-0.0446775	0.121686	0.11845		0.208285	0.176793	-0.114941	0.0900457	0.102896
36.7647	0	0.307719	0.10197	-0.0449035	0.121595	0.102265		0.190894	0.189449	-0.117389	0.0876515	0.102521
36.9118	0	0.292112	0.128643	-0.0351879	0.128522	0.0944833		0.232953	0.258066	-0.109757	0.127087	0.118644
37.0588	0	0.27868	0.0958048	-0.0289635	0.115174	0.0893355		0.213112	0.212831	-0.10212	0.107941	0.105031
37.2059	0	0.275398	0.0634204	-0.0288894	0.10331	0.090076		0.169196	0.145933	-0.101029	0.071367	0.0864592
37.3529	0	0.236297	0.0682452	-0.0388646	0.0885593	0.0800792		0.130126	0.151216	-0.110528	0.0569378	0.0839539
37.5	0	0.250881	0.0694439	-0.042436	0.0926296	0.0854633		0.145003	0.157928	-0.1266	0.0587773	0.0927635
37.6471	0	0.275558	0.0972873	-0.0433262	0.10984	0.0922677		0.193552	0.21228	-0.120004	0.0952759	0.107776
37.7941	0	0.243464	0.0707949	-0.037237	0.0923408	0.0817445		0.199189	0.200006	-0.123749	0.0918151	0.107783
37.9412	0	0.238177	0.054213	-0.0355967	0.0855978	0.0805746		0.170892	0.209253	-0.11705	0.0876982	0.102971
38.0882	0	0.340638	0.0399329	-0.041998	0.112858	0.11632		0.139731	0.152637	-0.122176	0.0567303	0.0895309
38.2353	0	0.298647	0.0450615	-0.052871	0.0969458	0.104738		0.126795	0.135379	-0.139295	0.0409597	0.0901613
38.3824	0	0.275022	0.0890009	-0.0527772	0.103748	0.0949142		0.156077	0.231559	-0.141755	0.0819604	0.11396
38.5294	0	0.283463	0.0900467	-0.0460228	0.109162	0.0955933		0.163525	0.178437	-0.128694	0.0710897	0.0999843
38.6765	0	0.350812	0.0901622	-0.0378541	0.134373	0.114355		0.142109	0.17535	-0.117102	0.0667853	0.0924432
38.8235	0	0.280195	0.10409	-0.0297526	0.118178	0.0897511		0.109118	0.192611	-0.117538	0.0613967	0.0926573
38.9706	0	0.300548	0.109078	-0.034677	0.124983	0.0970973		0.10793	0.153954	-0.114113	0.0492569	0.0827584
39.1176	0	0.250558	0.113948	-0.0352116	0.109765	0.082521		0.165118	0.115273	-0.119772	0.0535394	0.0878423
39.2647	0	0.225723	0.136149	-0.0286702	0.111067	0.0745		0.117144	0.128768	-0.113415	0.0441655	0.0788617
39.4118	0	0.222564	0.148231	-0.0160821	0.118238	0.0705045		0.170154	0.123787	-0.0940321	0.0666362	0.0814416
39.5588	0	0.245281	0.133883	-0.0122457	0.122306	0.0745666		0.185264	0.0920324	-0.0925271	0.0615899	0.0816233
39.7059	0	0.211223	0.115749	-0.0137772	0.104398	0.0651994		0.188675	0.0990683	-0.09221	0.0651779	0.0828363
39.8529	0	0.155534	0.0909735	-0.0186818	0.075942	0.0508503		0.221917	0.119991	-0.100528	0.0804599	0.0951574
40	0	0.229369	0.0625656	-0.0209261	0.0903363	0.0735762		0.259203	0.0679269	-0.099287	0.0759476	0.103565
40.1471	0	0.30186	0.0828249	-0.0147259	0.12332	0.0936066		0.240798	0.0473868	-0.0856472	0.0675126	0.0947724
40.2941	0	0.457096	0.0937873	-0.00768752	0.181065	0.14109		0.224188	0.0927614	-0.0695686	0.0824603	0.0849565
40.4412	0	0.413962	0.0747654	-0.000648443	0.162693	0.127507		0.266597	0.138015	-0.0637026	0.113637	0.0961253
40.5882	0	0.533266	0.0617334	-0.001645	0.197785	0.168736		0.257754	0.190106	-0.0609658	0.128965	0.0969522
40.7353	0	0.571253	0.0535891	-0.00350818	0.207111	0.182815		0.18487	0.181777	-0.0602785	0.102123	0.0812054
40.8824	0	0.569455	0.0497854	0.000432731	0.206558	0.182007		0.164426	0.233297	-0.0549791	0.114248	0.0869178
41.0294	0	0.626727	0.0727452	0.00425843	0.234577	0.197069		0.163954	0.230403	-0.0373575	0.119	0.0804976
41.1765	0	0.555202	0.0835831	0.0122282	0.217004	0.170349		0.14068	0.229113	-0.0256402	0.114718	0.0746779
41.3235	0	0.459035	0.0411437	0.0165979	0.172259	0.143563		0.136525	0.265453	-0.017037	0.128314	0.081651
41.4706	0	0.385402	0.0444296	0.0130278	0.14762	0.119236		0.14719	0.261107	-0.014819	0.131159	0.0800552
41.6176	0	0.412167	0.0372891	0.00513542	0.151531	0.130648		0.160688	0.175944	-0.0150558	0.107192	0.0612825
41.7647	0	0.287963	0.0558342	0.00376953	0.115856	0.0873564		0.132749	0.129834	-0.0154399	0.0823808	0.0489176
41.9118	0	0.229615	0.0766491	0.00749401	0.104586	0.0656246		0.241239	0.145861	-0.00657274	0.126842	0.0721663
42.0588	0	0.242041	0.0948228	0.0138781	0.116914	0.0667848		0.222339	0.172839	-0.00210845	0.131023	0.0680823
42.2059	0	0.20262	0.0801402	0.0177687	0.100176	0.0542943		0.308801	0.173592	0.0039414	0.162111	0.0881924
42.3529	0	0.253665	0.0824858	0.0152231	0.117125	0.0709779		0.316085	0.178792	-0.00286077	0.164005	0.0923681
42.5	0	0.258785	0.131995	0.0121459	0.134309	0.0712081		0.323103	0.181864	-0.0214815	0.161162	0.10001
42.6471	0	0.261821	0.110779	0.0169611	0.129854	0.0713254		0.287852	0.182622	-0.0301493	0.146775	0.0935324
42.7941	0	0.230355	0.107393	0.0199146	0.119221	0.0610361		0.342104	0.204729	-0.0351576	0.170559	0.110238
42.9412	0	0.260594	0.0976305	0.0255377	0.127921	0.0695244		0.33753	0.239203	-0.0318455	0.181629	0.110447
43.0882	0	0.246018	0.0768946	0.0282043	0.117039	0.0660035		0.313945	0.201151	-0.0428188	0.157426	0.105284
43.2353	0	0.261854	0.0555622	0.0260935	0.114503	0.0741649		0.394644	0.143722	-0.0437075	0.164886	0.126983
43.3824	0	0.312311	0.0872155	0.0235218	0.141016	0.0875987		0.375649	0.183333	-0.0611236	0.165953	0.126384
43.5294	0	0.264667	0.0654408	0.0218142	0.117307	0.0747486		0.351007	0.168464	-0.0609103	0.152854	0.119166
43.6765	0	0.349993	0.0372044	0.028315	0.138504	0.105775		0.335184	0.186719	-0.0452752	0.158876	0.110708
43.8235	0	0.2756	0.0309676	0.0296519	0.112073	0.0817644		0.374163	0.168857	-0.0383534	0.168222	0.119084
43.9706	0	0.307736	0.034881	0.0316456	0.124754	0.0914955		0.279253	0.182374	-0.0268469	0.144927	0.0903253
44.1176	0	0.257732	0.0419468	0.0271479	0.108942	0.0745173		0.257249	0.17412	-0.0305374	0.133611	0.0855104
44.2647	0	0.248938	0.0518305	0.0260703	0.108946	0.0703896		0.222134	0.219225	-0.0205406	0.140273	0.080411
44.4118	0	0.19575	0.066517	0.0268671	0.0963781	0.0509874		0.15922	0.226008	-0.0174962	0.122577	0.072642
44.5588	0	0.134319	0.054914	0.0340777	0.074437	0.0305393		0.0706777	0.186582	-0.00280849	0.0848171	0.0551275
44.7059	0	0.214977	0.0554134	0.0409035	0.103765	0.0557639		0.0617783	0.237884	-0.00318406	0.0988262	0.0720137
44.8529	0	0.183503	0.0486072	0.044443	0.0921844	0.0456751		0.0791062	0.189378	0.00560381	0.0913626	0.0534038
45	0	0.241092	0.0592324	0.0475939	0.115973	0.0626499		0.031989	0.195126	0.014001	0.080372	0.0576115
45.1471	0	0.200324	0.101332	0.0510692	0.117575	0.0438449		0.0539512	0.169568	0.0119397	0.0784862	0.0471279
45.2941	0	0.243332	0.0869522	0.0578499	0.129378	0.0575931		0.0618989	0.113123	0.0200227	0.065015	0.026921
45.4412	0	0.220615	0.0643953	0.0645863	0.116532	0.0520414		0.0619192	0.0813979	0.0315922	0.0583031	0.0144909
45.5882	0	0.265548	0.0541853	0.0688348	0.129523	0.0681441		0.0546002	0.086821	0.0373572	0.0595928	0.0144955
45.7353	0	0.350142	0.0520953	0.0665225	0.156253	0.0970337		0.131	0.0689692	0.0276219	0.0758638	0.0300412
45.8824	0	0.308641	0.0630053	0.063395	0.145014	0.0818138		0.128691	0.0591037	0.0284447	0.0720799	0.0296571
46.0294	0	0.297251	0.0974121	0.0541088	0.149591	0.074881		0.145161	0.0874367	0.0207221	0.0844398	0.0359535
46.1765	0	0.229687	0.0993815	0.0519606	0.12701	0.0531325		0.15139	0.074391	0.019691	0.0818239	0.0381994
46.3235	0	0.227434	0.0714957	0.0467275	0.115219	0.056561		0.127758	0.09577	0.0213057	0.0816114	0.0315351
46.4706	0	0.202134	0.0498726	0.0417012	0.0979025	0.0521689		0.179952	0.182139	0.020235	0.127442	0.0536072
46.6176	0	0.282893	0.0505709	0.0309128	0.121459	0.0809162		0.236451	0.217469	0.0093595	0.154427	0.0727403
46.7647	0	0.293456	0.0695285	0.0227463	0.128577	0.0835382		0.276093	0.160323	0.00531405	0.147243	0.0784402
46.9118	0	0.188468	0.0631765	0.0184483	0.090031	0.0508841		0.181518	0.189245	0.00939098	0.126718	0.0587058
47.0588	0	0.197216	0.0437731	0.017959	0.0863161	0.0559485		0.135824	0.222019	0.0163304	0.124725	0.0596361
47.2059	0	0.167961	0.0474509	0.0206337	0.0786818	0.0453058		0.100062	0.208272	0.0241822	0.110839	0.0534146
47.3529	0	0.223093	0.0087695	0.0159547	0.0826056	0.0702741		0.114507	0.265026	0.0162425	0.131925	0.0723437
47.5	0	0.281202	-0.0313845	0.0154541	0.0884238	0.0973327		0.136789	0.299525	0.0120877	0.149467	0.0832178
47.6471	0	0.348923	-0.00382209	0.0139035	0.119668	0.114741		0.124803	0.277931	0.00398645	0.135573	0.079264
47.7941	0	0.358958	0.0347145	0.0166308	0.136768	0.111218		0.0786841	0.241902	0.0104595	0.110349	0.0686619
47.9412	0	0.298084	0.0450807	0.0197145	0.12096	0.0888644		0.0679336	0.323787	0.0147837	0.135501	0.0953849
48.0882	0	0.384624	0.0485074	0.0252051	0.152779	0.116118		0.106754	0.291691	0.0280171	0.142154	0.0781469
48.2353	0	0.396057	0.0853498	0.0286563	0.170021	0.114197		0.163328	0.26063	0.0463033	0.156754	0.0619582
48.3824	0	0.335663	0.0771269	0.0305918	0.147794	0.0948904		0.258179	0.310663	0.0492858	0.206042	0.0798292
48.5294	0	0.322242	0.116826	0.0356212	0.15823	0.0852908		0.245053	0.319429	0.0588672	0.207783	0.0774917
48.6765	0	0.311749	0.150094	0.0393917	0.167078	0.0790799		0.30421	0.310114	0.0661487	0.226824	0.0803559
48.8235	0	0.234158	0.13799	0.0396448	0.137264	0.0561524		0.326478	0.33216	0.0843224	0.247653	0.081682
48.9706	0	0.180794	0.107001	0.0469345	0.111576	0.0387095		0.33474	0.349087	0.0905694	0.258132	0.0838838
49.1176	0	0.248648	0.10835	0.0483557	0.135118	0.0593482		0.347858	0.319693	0.0919206	0.253157	0.0810273
49.2647	0	0.25233	0.11042	0.044107	0.135619	0.0614152		0.345269	0.310485	0.0878729	0.247875	0.080629
49.4118	0	0.257642	0.106751	0.0361122	0.133502	0.065334		0.372715	0.307105	0.0669673	0.248929	0.0929315
49.5588	0	0.405972	0.0956726	0.0290519	0.176899	0.11614		0.34058	0.269903	0.0526813	0.221055	0.0866238
49.7059	0	0.368836	0.10007	0.0237799	0.164229	0.104647		0.329838	0.250587	0.0400398	0.206822	0.0864723
49.8529	0	0.460895	0.105249	0.0218607	0.196002	0.134617		0.289885	0.235174	0.034361	0.186473	0.0776786
50	0	0.505014	0.114527	0.0203814	0.213307	0.148364		0.249061	0.256719	0.0175744	0.174452	0.0784698
50.1471	0	0.509967	0.152199	0.0117847	0.22465	0.148305		0.245372	0.236924	0.00643226	0.162909	0.0782766
50.2941	0	0.45703	0.145918	0.00448497	0.202478	0.133664		0.229678	0.295278	-0.00820505	0.17225	0.0921935
50.4412	0	0.452283	0.141854	-0.000905953	0.197744	0.133776		0.21076	0.324473	-0.014292	0.173647	0.099538
50.5882	0	0.450734	0.136283	-0.00054581	0.19549	0.133595		0.222671	0.302144	-0.0216454	0.167723	0.0974241
50.7353	0	0.39499	0.138908	0.00198318	0.178627	0.115176		0.232548	0.33083	-0.0239154	0.179821	0.105745
50.8824	0	0.424843	0.116429	0.00179572	0.181022	0.126322		0.26709	0.345464	-0.0247778	0.195925	0.112647
51.0294	0	0.274147	0.0966028	-0.00412826	0.122207	0.0813448		0.284907	0.310397	-0.0289426	0.188787	0.109113
51.1765	0	0.225372	0.0928672	-0.00473985	0.1045	0.0666816		0.339391	0.264822	-0.0350826	0.18971	0.114439
51.3235	0	0.261456	0.0520194	-0.00235889	0.103705	0.0804221		0.357294	0.252213	-0.0423489	0.189053	0.119611
51.4706	0	0.247449	0.0307984	-0.000137677	0.0927032	0.0778865		0.317786	0.175911	-0.0341297	0.153189	0.102223
51.6176	0	0.174657	0.0143944	0.00260895	0.0638869	0.0554896		0.307665	0.148547	-0.0347227	0.140496	0.0989207
51.7647	0	0.111148	0.00541236	0.00297287	0.0398445	0.0356589		0.249713	0.144543	-0.0284158	0.121947	0.0810799
51.9118	0	0.0568297	-0.00343308	0.00241703	0.0186046	0.019187		0.186384	0.0965474	-0.0250527	0.0859596	0.0612657
52.0588	0	0.0362037	0.000645583	0.000826889	0.0125587	0.0118226		0.148569	0.0267931	-0.0191936	0.0520561	0.0500491
52.2059	0	0.0439113	0.00488169	0.00371048	0.0175012	0.0132094		0.104073	0.0323124	-0.0146622	0.0405745	0.034524
52.3529	0	0.0606365	0.00178658	0.00323089	0.0218847	0.0193804		0.040116	0.00256114	-0.00509291	0.0125281	0.0139698
52.5		0	0	0				0	0	0
52.6471		0	0	0				0	0	0
52.7941		0	0	0				0	0	0
52.9412		0	0	0				0	0	0
53.0882		0	0	0				0	0	0
53.2353		0	0	0				0	0	0
53.3824		0	0	0				0	0	0

## Sheet: gamma5
time	stimulus	2P_fly1	2P_fly2	2P_fly3	2P average	sem		3P_fly1	3P_fly2	3P_fly3	3P average	sem
-47.9412	0	0.0997429	0.0655389	0.0545179	0.0732666	0.0136151		0.0341694	0.0249255	0.0711945	0.0434298	0.0141365
-47.7941	0	0.123738	0.049264	0.0541035	0.0757019	0.0240587		0.0386054	0.0398556	0.0711998	0.0498869	0.0106625
-47.6471	0	0.189311	0.101753	0.0528817	0.114649	0.0399081		0.179085	0.169407	0.0781556	0.142216	0.0321517
-47.5	0	0.247442	0.162596	0.0531655	0.154401	0.0562323		0.280481	0.269467	0.0746894	0.208212	0.0668372
-47.3529	0	0.0997429	0.0655389	0.0545179	0.0732666	0.0136151		0.0341694	0.0249255	0.0711945	0.0434298	0.0141365
-47.2059	0	0.123738	0.049264	0.0541035	0.0757019	0.0240587		0.0386054	0.0398556	0.0711998	0.0498869	0.0106625
-47.0588	0	0.189311	0.101753	0.0528817	0.114649	0.0399081		0.179085	0.169407	0.0781556	0.142216	0.0321517
-46.9118	0	0.247442	0.162596	0.0531655	0.154401	0.0562323		0.280481	0.269467	0.0746894	0.208212	0.0668372
-46.7647	0	0.329774	0.187629	0.0509628	0.189455	0.0804911		0.369543	0.336037	0.0716262	0.259069	0.0942189
-46.6176	0	0.375345	0.209895	0.0450637	0.210101	0.0953441		0.453507	0.422101	0.0751878	0.316932	0.121212
-46.4706	0	0.41419	0.188519	0.0412129	0.214641	0.108459		0.473998	0.422678	0.0764905	0.324389	0.124831
-46.3235	0	0.419664	0.190781	0.0399391	0.216795	0.110386		0.458608	0.415787	0.0808004	0.318399	0.11944
-46.1765	0	0.382978	0.191821	0.0386631	0.204487	0.0995966		0.474575	0.417067	0.0825151	0.324719	0.122234
-46.0294	0	0.362884	0.21122	0.0360245	0.203376	0.0944376		0.48072	0.412397	0.0776254	0.323581	0.124549
-45.8824	0	0.295563	0.154209	0.0301748	0.159982	0.0766653		0.342559	0.281917	0.0644451	0.22964	0.0844323
-45.7353	0	0.238771	0.0989671	0.0224615	0.120066	0.0633279		0.239434	0.198332	0.0578112	0.165192	0.054986
-45.5882	0	0.18188	0.0691068	0.0192647	0.0900837	0.0481003		0.158067	0.123862	0.0541778	0.112036	0.0305676
-45.4412	0	0.133517	0.0225181	0.0178701	0.0579684	0.0377981		0.082481	0.0303603	0.0508006	0.0545473	0.0151621
-45.2941	0	0.0886304	0.0239021	0.0164714	0.0430013	0.0229152		0.0759834	0.0394156	0.048346	0.0545817	0.011007
-45.1471	0	0.0631023	0.0129329	0.0133284	0.0297879	0.0166576		0.0750447	0.0545235	0.0328766	0.0541482	0.0121743
-45	0	0.073696	0.0116546	0.012328	0.0325595	0.0205691		0.0598285	0.0540827	0.0244862	0.0461325	0.0109495
-44.8529	0	0.0757902	0.0151283	0.00955898	0.0334925	0.0212099		0.0431077	0.061433	0.0207079	0.0417495	0.0117759
-44.7059	0	0.071537	0.0203883	0.0082434	0.0333896	0.0193932		0.0432237	0.0799448	0.019438	0.0475355	0.0175994
-44.5588	0	0.0606493	0.0229449	0.010823	0.0314724	0.0150023		0.0415089	0.0874663	0.0187295	0.0492349	0.0202151
-44.4118	0	0.0300193	0.0220474	0.0123201	0.0214623	0.00511769		0.02931	0.0883239	0.0153233	0.044319	0.0223698
-44.2647	0	0.0138895	0.0111848	0.0108336	0.0119693	0.00096544		0.0195441	0.0959128	0.010027	0.0418279	0.0271816
-44.1176	0	0.0162998	0.0114067	0.0110299	0.0129121	0.00169734		0.0179749	0.0880889	0.00646764	0.0375105	0.0255064
-43.9706	0	0.0249044	0.0232291	0.0102531	0.0194622	0.00462988		0.0150738	0.0842589	0.0148565	0.0380631	0.023098
-43.8235	0	0.0192953	0.0291195	0.0088332	0.0190827	0.00585711		0.0305418	0.0754581	0.0303613	0.0454537	0.0150023
-43.6765	0	0.0233788	0.0279169	0.0113106	0.0208688	0.0049554		0.0449782	0.0656067	0.0343363	0.048307	0.00917914
-43.5294	0	6.73596e-05	0.0375829	0.0120992	0.0165832	0.0110594		0.0405931	0.0438505	0.0348682	0.0397706	0.00262537
-43.3824	0	-0.00787732	0.0316176	0.00630199	0.0100141	0.0115513		0.0222632	0.0368441	0.0349621	0.0313564	0.00457899
-43.2353	0	0.00103742	0.0268634	0.00282173	0.0102408	0.0083272		0.0277865	0.0322486	0.0326917	0.0309089	0.00156646
-43.0882	0	0.00905859	0.0272376	0.00313119	0.0131425	0.00725231		0.0141425	0.0138557	0.0374367	0.0218117	0.00781297
-42.9412	0	0.0187564	0.0292104	0.00485138	0.0176061	0.00705533		-0.00452864	0.0149581	0.0340148	0.0148148	0.0111268
-42.7941	0	0.0291249	0.0276766	0.00472388	0.0205085	0.00790335		-0.0163651	0.00848044	0.0295296	0.00721499	0.0132637
-42.6471	0	0.0334587	0.0346903	0.00261511	0.023588	0.0104925		-0.0138455	0.0247029	0.0166886	0.00918201	0.0117439
-42.5	0	0.0226303	0.0293654	-0.000703744	0.0170973	0.00911041		-0.0210521	0.0146384	0.00738014	0.000322163	0.0108906
-42.3529	0	0.038458	0.00657622	-0.00159285	0.0144804	0.0122185		-0.0161174	0.0119727	0.00432474	5.99904e-05	0.00838461
-42.2059	0	0.0379392	0.0219518	0.000403524	0.0200982	0.0108752		0.00157169	0.00624212	0.0084303	0.00541471	0.00202267
-42.0588	0	0.0566978	0.0320689	0.00428066	0.0310158	0.0151407		0.00690291	0.00483538	0.0132121	0.00831678	0.00251936
-41.9118	0	0.0358721	0.0400385	0.00356843	0.026493	0.0115252		0.01745	0.0223701	0.00793508	0.0159184	0.00423681
-41.7647	0	0.0147378	0.0339683	0.00158468	0.0167636	0.00940305		0.0328517	0.0490083	0.00637625	0.0294121	0.0124264
-41.6176	0	-0.00933205	0.030145	0.00213059	0.00764784	0.0117252		0.0232115	0.0624299	0.00506015	0.0302338	0.0169293
-41.4706	0	-0.0324075	0.0258838	0.00393582	-0.000862633	0.0169974		-0.00576061	0.0503105	0.0102602	0.01827	0.0166744
-41.3235	0	-0.0477804	0.0230901	0.0047597	-0.00664353	0.0212382		-0.025027	0.060367	0.0164119	0.0172506	0.0246547
-41.1765	0	-0.0568919	0.0506101	0.00739728	0.000371854	0.0312313		-0.0340696	0.0978408	0.0207093	0.0281602	0.038261
-41.0294	0	-0.0511793	0.0517478	0.00940847	0.00332565	0.0298677		-0.0265367	0.104836	0.0152463	0.0311817	0.0387518
-40.8824	0	-0.0696895	0.0513653	0.00631175	-0.00400417	0.0353241		-0.0337557	0.110434	0.00723534	0.0279711	0.0428957
-40.7353	0	-0.069887	0.0571641	0.00380859	-0.00297142	0.0368328		-0.0286177	0.115497	0.00335172	0.0300771	0.0436957
-40.5882	0	-0.0741242	0.0529204	0.00326528	-0.00597951	0.0369648		-0.0228931	0.0980707	0.00778268	0.0276534	0.0363051
-40.4412	0	-0.0775447	0.0649167	0.00239152	-0.00341214	0.0412273		-0.00720734	0.0896431	0.0141587	0.0321982	0.0293773
-40.2941	0	-0.0657517	0.0616396	0.00233703	-0.000591698	0.0368038		0.0103377	0.0974472	0.0131323	0.0403058	0.0285821
-40.1471	0	-0.0592425	0.0786473	0.00402741	0.00781073	0.0398503		0.0381779	0.106718	0.00956334	0.0514864	0.0288248
-40	0	-0.0588775	0.0597984	-3.49252e-05	0.000295331	0.0342592		0.0432749	0.0834745	0.000761676	0.0425037	0.0238803
-39.8529	0	-0.0723486	0.0608232	-0.000757271	-0.00409422	0.0384796		0.0297932	0.0934204	-0.00149293	0.0405736	0.0279243
-39.7059	0	-0.0854764	0.0583411	-0.00373007	-0.0102885	0.0416459		0.0191701	0.0994116	0.00427841	0.0409534	0.0295436
-39.5588	0	-0.062538	0.059526	-0.00141234	-0.00147478	0.0352369		0.00598367	0.0941836	0.00757081	0.0359127	0.029139
-39.4118	0	-0.0413224	0.0800338	-0.0009467	0.0125882	0.0356802		0.0293253	0.0939918	0.00478136	0.0426995	0.0266069
-39.2647	0	-0.00907111	0.0856378	-0.00637908	0.0233959	0.0311307		0.0347043	0.109451	-0.00916401	0.0449969	0.0346256
-39.1176	0	-0.00174393	0.0891803	-0.0108843	0.0255174	0.0319407		0.0245463	0.115252	-0.0200534	0.0399149	0.039808
-38.9706	0	-0.00618794	0.0819957	-0.0183801	0.0191426	0.031623		0.00360523	0.111299	-0.0202294	0.0315582	0.0404596
-38.8235	0	-0.0082505	0.0819248	-0.0206342	0.01768	0.0323207		0.00581003	0.120049	-0.0127203	0.0377129	0.0415141
-38.6765	0	0.00300622	0.0831847	-0.0253921	0.0202663	0.0325098		0.0279111	0.120955	-0.00766075	0.0470685	0.0383439
-38.5294	0	0.027296	0.0948991	-0.0217027	0.0334975	0.0338025		0.0414564	0.128548	-0.0103766	0.0532094	0.0405324
-38.3824	0	0.0144808	0.0977803	-0.0253059	0.0289851	0.0362644		0.0554834	0.14364	-0.0150167	0.0613687	0.0458946
-38.2353	0	0.0158399	0.0776584	-0.0337133	0.0199284	0.0322152		0.0311402	0.138936	-0.0195901	0.0501622	0.0467406
-38.0882	0	0.00233843	0.0770178	-0.0331325	0.0154079	0.0324622		0.0373973	0.133113	-0.0166507	0.0512867	0.0437874
-37.9412	0	-0.00820868	0.0739977	-0.0362265	0.00985417	0.0330759		0.0507115	0.131509	-0.0117204	0.0568332	0.0414598
-37.7941	0	0.0182721	0.0796363	-0.0318446	0.0220213	0.0322363		0.0503012	0.13203	-0.0129326	0.0564661	0.0419604
-37.6471	0	0.0439967	0.0831355	-0.0296877	0.0324815	0.0330743		0.0775631	0.111574	-0.0228226	0.055438	0.0403432
-37.5	0	0.0627707	0.0801183	-0.0289987	0.0379634	0.0338535		0.0653162	0.0917927	-0.0378137	0.039765	0.0395352
-37.3529	0	0.0587091	0.061295	-0.0366318	0.0277908	0.0322199		0.0563529	0.0789879	-0.0457185	0.0298741	0.0383569
-37.2059	0	0.0560122	0.0617586	-0.0373308	0.0268133	0.0321149		0.0509668	0.0697873	-0.0495513	0.0237343	0.0370434
-37.0588	0	0.0575292	0.0611041	-0.0320676	0.0288552	0.0304789		0.0539069	0.0701649	-0.0411565	0.0276384	0.0347162
-36.9118	0	0.0752034	0.0404058	-0.029339	0.0287568	0.0307357		0.0613864	0.0697928	-0.0339022	0.0324257	0.0332526
-36.7647	0	0.0987101	0.0584779	-0.021086	0.0453674	0.035198		0.0564719	0.0655234	-0.0378818	0.0280378	0.0330632
-36.6176	0	0.102405	0.058153	-0.0239299	0.0455429	0.0370109		0.0866138	0.0665826	-0.037867	0.0384431	0.0385907
-36.4706	0	0.0958121	0.0679107	-0.027226	0.0454989	0.0372438		0.0729788	0.100606	-0.0360505	0.0458447	0.041717
-36.3235	0	0.0877843	0.0689427	-0.0276099	0.043039	0.0357408		0.0694306	0.0995442	-0.0285791	0.0467986	0.0386784
-36.1765	0	0.0886499	0.0644441	-0.0242892	0.0429349	0.0343307		0.0704243	0.0931846	-0.0241964	0.0464709	0.0359393
-36.0294	0	0.120864	0.0644775	-0.0201964	0.0550483	0.0409926		0.0733721	0.0826391	-0.0204094	0.0452006	0.0329139
-35.8824	0	0.142798	0.080659	-0.0217069	0.06725	0.0479594		0.0816682	0.116548	-0.0269059	0.0571033	0.0431946
-35.7353	0	0.141373	0.0979568	-0.0239555	0.0717916	0.049487		0.0977495	0.107285	-0.0374325	0.0558674	0.0467311
-35.5882	0	0.139592	0.0815782	-0.0302413	0.0636431	0.0498401		0.113984	0.118127	-0.0366111	0.0651664	0.0509028
-35.4412	0	0.157556	0.0659258	-0.0296155	0.0646221	0.0540357		0.0953468	0.117488	-0.0402798	0.0575184	0.0493151
-35.2941	0	0.162127	0.0524524	-0.0276415	0.0623126	0.0550029		0.0897642	0.0991086	-0.0347618	0.0513703	0.0431505
-35.1471	0	0.172061	0.0622131	-0.0271862	0.0690294	0.0576187		0.0939161	0.104957	-0.0346067	0.0547555	0.0447946
-35	0	0.175854	0.0765296	-0.0249043	0.0758263	0.0579549		0.13073	0.122903	-0.0367779	0.072285	0.0545783
-34.8529	0	0.175845	0.0781517	-0.0287585	0.0750794	0.0590839		0.148478	0.13123	-0.0352037	0.0815013	0.0585645
-34.7059	0	0.163416	0.0840029	-0.027407	0.0733371	0.0553433		0.164	0.0849506	-0.0310502	0.0726334	0.0566419
-34.5588	0	0.164785	0.0633113	-0.0293115	0.0662615	0.0560501		0.161215	0.0948112	-0.0254861	0.0768469	0.0546395
-34.4118	0	0.155758	0.0523669	-0.023585	0.0615134	0.0519736		0.150721	0.0849834	-0.018617	0.0723626	0.0492894
-34.2647	0	0.130626	0.0633702	-0.0236099	0.0567956	0.0446454		0.171144	0.092881	-0.00980946	0.0847385	0.0523952
-34.1176	0	0.130424	0.0756558	-0.0239745	0.0607019	0.0451939		0.183832	0.0841851	-0.0186567	0.0831202	0.0584559
-33.9706	0	0.140709	0.0599728	-0.023194	0.0591626	0.0473164		0.180959	0.0829633	-0.0293814	0.0781804	0.0607673
-33.8235	0	0.143481	0.057816	-0.0226266	0.0595569	0.0479592		0.164068	0.0741905	-0.0271948	0.0703545	0.055246
-33.6765	0	0.115212	0.0612698	-0.0228637	0.0512059	0.0401753		0.130293	0.0745117	-0.0250283	0.0599256	0.0454268
-33.5294	0	0.102461	0.0472145	-0.0195478	0.043376	0.0352732		0.0989803	0.0854022	-0.0224841	0.0539662	0.0384256
-33.3824	0	0.0986513	0.0650237	-0.0144763	0.0497329	0.0335401		0.0884775	0.0852225	-0.01718	0.0521734	0.0346894
-33.2353	0	0.10322	0.0772321	-0.0170018	0.0544833	0.0365214		0.113671	0.0780792	-0.0160329	0.0585725	0.0386918
-33.0882	0	0.108831	0.0670554	-0.013264	0.0542076	0.0358266		0.100622	0.0797245	-0.0232494	0.0523655	0.0382857
-32.9412	0	0.114434	0.056341	-0.0126759	0.0526997	0.0367386		0.093695	0.0885453	-0.0162689	0.0553238	0.0358272
-32.7941	0	0.0874274	0.0617413	-0.00881932	0.0467831	0.0287731		0.0852436	0.0998547	0.000485611	0.0618613	0.0309763
-32.6471	0	0.0781229	0.0601744	-0.00368261	0.0448716	0.0248238		0.0837453	0.107519	0.00992947	0.0670647	0.0293804
-32.5	0	0.0958152	0.0598097	0.00199965	0.0525415	0.027325		0.132323	0.103429	0.0151333	0.0836285	0.0352487
-32.3529	0	0.117005	0.0619319	0.00286971	0.0606022	0.0329547		0.149772	0.119123	0.0152752	0.0947234	0.0406975
-32.2059	0	0.119163	0.0570595	0.000615716	0.0589462	0.0342348		0.164605	0.129516	0.00891296	0.101011	0.0471501
-32.0588	0	0.107337	0.0480184	0.00368659	0.0530138	0.0300252		0.132488	0.150613	0.0111975	0.0980996	0.0437649
-31.9118	0	0.0987528	0.0519594	0.00282841	0.0511802	0.0276937		0.143073	0.15405	0.0191031	0.105409	0.043269
-31.7647	0	0.0795144	0.0500509	0.00299271	0.044186	0.0222837		0.127463	0.151101	0.0232808	0.100615	0.0392645
-31.6177	0	0.0750527	0.0554805	0.000470256	0.0436678	0.0223255		0.138455	0.151683	0.01754	0.102559	0.0426808
-31.4706	0	0.0915217	0.0646612	-0.00394237	0.0507469	0.0284227		0.146578	0.135923	0.0126046	0.0983685	0.0429921
-31.3235	0	0.0906374	0.0691046	-0.00709636	0.0508819	0.0296481		0.126506	0.145522	0.00591392	0.0926473	0.0437127
-31.1765	0	0.0684798	0.0737677	-0.0106767	0.0438569	0.0273095		0.102209	0.139457	0.00313039	0.0815988	0.040681
-31.0294	0	0.0391205	0.0767813	-0.00905875	0.0356143	0.0248418		0.0745189	0.106559	0.00675057	0.0626094	0.0294211
-30.8823	0	0.0595758	0.0824124	-0.0162844	0.0419013	0.0298304		0.0711882	0.0985324	-0.000786761	0.0563113	0.0296202
-30.7353	0	0.0609985	0.0904604	-0.0170825	0.0447921	0.032085		0.0523424	0.0858718	-0.00780248	0.0434705	0.0274028
-30.5882	0	0.0611937	0.0882152	-0.018559	0.0436166	0.0320515		0.0751255	0.0966454	-0.0122671	0.0531679	0.0333021
-30.4412	0	0.0823895	0.0805795	-0.01848	0.048163	0.0333256		0.0654094	0.114309	-0.0109193	0.0562664	0.0364382
-30.2941	0	0.0654015	0.080439	-0.0210796	0.041587	0.0316326		0.0456937	0.115746	-0.0147136	0.0489086	0.0376946
-30.1471	0	0.0576894	0.0807765	-0.0195649	0.0396337	0.0303403		0.0347765	0.10828	-0.00972776	0.0444429	0.034407
-30	0	0.0552527	0.0767271	-0.0148488	0.0390436	0.0276501		0.0356453	0.119814	-0.00871026	0.0489164	0.0376905
-29.8529	0	0.0855696	0.0759181	-0.0148645	0.0488744	0.031991		0.0392754	0.139523	-0.0118131	0.0556616	0.0444485
-29.7059	0	0.0760911	0.0909576	-0.0100288	0.0523399	0.0314783		0.0555887	0.140681	-0.0129398	0.0611099	0.0444323
-29.5588	0	0.0693696	0.0825549	-0.00973109	0.0473978	0.0288169		0.0528293	0.139201	-0.00808479	0.0613153	0.042729
-29.4118	0	0.0580935	0.0919222	-0.00690037	0.0477051	0.0289966		0.0343968	0.117852	-0.00361962	0.0495431	0.0358744
-29.2647	0	0.0485863	0.105389	-0.00575568	0.0494065	0.0320873		0.0345908	0.0977012	-0.00808998	0.0414007	0.0307285
-29.1177	0	0.0423727	0.111117	-0.00210959	0.0504601	0.0329349		0.0505102	0.0958577	-0.00660522	0.0465876	0.0296435
-28.9706	0	0.0445712	0.100076	-0.00446489	0.0467274	0.0301975		0.0833482	0.114135	-0.0132917	0.0613973	0.0383875
-28.8235	0	0.0573874	0.118181	-0.00732654	0.0560805	0.0362367		0.112463	0.0994572	-0.0177427	0.0647258	0.0414048
-28.6765	0	0.0416192	0.129291	-0.0053812	0.0551763	0.0394631		0.101841	0.0911737	-0.0079613	0.0616845	0.0349588
-28.5294	0	0.0395576	0.1258	-0.00418461	0.0537242	0.0381859		0.0844314	0.0789948	-0.00409815	0.0531093	0.0286468
-28.3823	0	0.0321499	0.127982	-0.00241441	0.0525724	0.0390026		0.0888077	0.0784235	-0.00515111	0.0540267	0.0297404
-28.2353	0	0.0584533	0.131467	-0.00630651	0.0612046	0.0397956		0.111739	0.0803213	-0.0127092	0.0597837	0.0373639
-28.0882	0	0.0534174	0.115204	-0.00820946	0.0534705	0.0356263		0.125974	0.087443	-0.0135034	0.0666378	0.0415857
-27.9412	0	0.0692431	0.11174	-0.0128927	0.0560301	0.0365799		0.106621	0.100686	-0.0139478	0.0644532	0.0392379
-27.7941	0	0.0741437	0.110009	-0.0104008	0.0579172	0.0356936		0.0758274	0.0901658	-0.00568432	0.0534363	0.0298487
-27.6471	0	0.0628507	0.0863413	-0.0104576	0.0462448	0.0291509		0.0614786	0.0785373	0.00438659	0.0481342	0.0224213
-27.5	0	0.0666868	0.0726778	-0.00986235	0.0431674	0.0265712		0.0656214	0.07633	-0.000703809	0.0470825	0.0240923
-27.3529	0	0.0778992	0.0727296	-0.0112922	0.0464455	0.0289074		0.0723377	0.0992049	-0.00387075	0.0558906	0.0308709
-27.2059	0	0.0957363	0.0724872	-0.0174767	0.0502489	0.0345215		0.0916558	0.1059	-0.00941832	0.0627124	0.036299
-27.0588	0	0.114507	0.0843045	-0.0135256	0.0617621	0.0386404		0.0773021	0.105812	-0.00526376	0.0592833	0.0333063
-26.9118	0	0.121546	0.0929468	-0.013019	0.067158	0.0409298		0.0855913	0.09764	0.00409244	0.0624412	0.029381
-26.7647	0	0.110205	0.0981124	-0.00692166	0.0671321	0.0371911		0.0680726	0.0799627	0.00761528	0.0518835	0.0223987
-26.6177	0	0.106199	0.0945801	-0.00939443	0.0637949	0.036748		0.0708294	0.0603672	-0.000166418	0.0436768	0.0221287
-26.4706	0	0.11144	0.0999375	-0.0107414	0.0668787	0.0389519		0.0812998	0.0644477	-0.00976726	0.0453267	0.0279733
-26.3235	0	0.124017	0.101101	-0.0156551	0.0698213	0.0432471		0.101679	0.0691451	-0.0110262	0.0532659	0.0334899
-26.1765	0	0.130234	0.0979452	-0.0178899	0.0700964	0.0449698		0.117389	0.04539	-0.00856849	0.0514034	0.0364848
-26.0294	0	0.12692	0.101873	-0.0141627	0.0715435	0.0434588		0.10234	0.0326893	0.000445632	0.0451582	0.0300678
-25.8823	0	0.0903041	0.0859368	-0.0152929	0.0536493	0.0344942		0.103469	0.0390749	0.000505497	0.0476833	0.0300331
-25.7353	0	0.0679668	0.0761925	-0.0150655	0.0430313	0.0291453		0.0815933	0.0266828	-0.0049514	0.0344416	0.0252827
-25.5882	0	0.107551	0.0746267	-0.0197628	0.0541382	0.0381533		0.0919736	0.035874	-0.00787667	0.0399903	0.0288977
-25.4412	0	0.103801	0.0805258	-0.0232337	0.0536977	0.0390481		0.106574	0.0406111	-0.00879862	0.0461287	0.0334192
-25.2941	0	0.111257	0.0887405	-0.0261606	0.0579455	0.0425524		0.100434	0.0624461	-0.0109419	0.0506461	0.0326883
-25.1471	0	0.0814421	0.0996056	-0.0235107	0.0525123	0.0383714		0.0775352	0.0660435	-0.00987177	0.044569	0.0274218
-25	0	0.062465	0.0959951	-0.0205271	0.0459777	0.0346325		0.0537122	0.0786893	-0.0109419	0.0404865	0.026706
-24.8529	0	0.0525467	0.0801951	-0.0250954	0.0358821	0.0315162		0.0527564	0.0817938	-0.0180455	0.0388349	0.0296498
-24.7059	0	0.0539175	0.0830664	-0.0300446	0.0356464	0.0339062		0.0635912	0.101503	-0.023909	0.0470616	0.0371347
-24.5588	0	0.09616	0.0847764	-0.0312209	0.0499052	0.0406959		0.0719771	0.101943	-0.0242308	0.0498964	0.0380597
-24.4118	0	0.0651486	0.0743915	-0.0260498	0.0378301	0.0320512		0.0806892	0.100218	-0.0173413	0.054522	0.0363712
-24.2647	0	0.0716369	0.0785978	-0.0210284	0.0430688	0.0321115		0.0704874	0.096619	-0.00768498	0.0531405	0.0313343
-24.1177	0	0.0627238	0.0565446	-0.0160721	0.0343987	0.0252984		0.0568216	0.0779445	0.000808601	0.0451916	0.023014
-23.9706	0	0.0789217	0.0440481	-0.0158717	0.0356994	0.0276811		0.067772	0.0722711	-0.00376067	0.0454275	0.0246283
-23.8235	0	0.0818435	0.0383674	-0.0163407	0.0346234	0.0284051		0.0771011	0.0613453	-0.00451825	0.0446427	0.0249977
-23.6765	0	0.0986447	0.0537957	-0.0120481	0.0467974	0.0321453		0.0713519	0.0555329	-0.00434224	0.0408475	0.0230517
-23.5294	0	0.108235	0.0466946	-0.00297547	0.0506513	0.0321645		0.057603	0.0288326	0.0105945	0.0323434	0.0136833
-23.3823	0	0.103574	0.051426	0.0014067	0.0521357	0.0294954		0.0571649	0.0404304	0.0200805	0.0392253	0.0107223
-23.2353	0	0.0939277	0.0437755	-0.000179128	0.0458414	0.0271859		0.0622516	0.0275592	0.0229719	0.0375942	0.0123996
-23.0882	0	0.0807218	0.0335485	0.00151077	0.0385937	0.023005		0.055577	0.0037001	0.0184774	0.0259181	0.0154308
-22.9412	0	0.103056	0.0425522	0.00494516	0.0501844	0.028578		0.0788318	-0.000387609	0.0191023	0.0325155	0.0238318
-22.7941	0	0.127433	0.035515	0.00682749	0.0565918	0.0363758		0.0841402	-0.00783761	0.0308344	0.0357123	0.0266635
-22.6471	0	0.122441	0.0432258	0.0114807	0.0590491	0.0329941		0.0792386	-0.00502876	0.0413918	0.0385339	0.0243678
-22.5	0	0.108549	0.0317492	0.0179231	0.0527403	0.0281882		0.0812194	-0.0150767	0.0605676	0.0422367	0.0292703
-22.3529	0	0.0973167	0.0368133	0.024101	0.0527437	0.0225866		0.069467	-0.00129538	0.0653085	0.0444934	0.0229258
-22.2059	0	0.0817675	0.0365299	0.0284197	0.0489057	0.0165969		0.0525998	-0.00666568	0.0682171	0.0380504	0.022808
-22.0588	0	0.0856681	0.0418699	0.0327335	0.0534238	0.0163364		0.0457412	0.00571362	0.0663097	0.0392549	0.0177907
-21.9118	0	0.0818022	0.0490704	0.0371753	0.056016	0.0133426		0.0436547	0.032981	0.0731359	0.0499239	0.0120081
-21.7647	0	0.0640344	0.0500154	0.0410677	0.0517058	0.00668357		0.0119977	0.0374223	0.0845558	0.0446586	0.0212559
-21.6177	0	0.0383537	0.062542	0.0467912	0.049229	0.00708812		-0.00193166	0.0456789	0.094935	0.0462274	0.0279643
-21.4706	0	0.0257941	0.044229	0.0554565	0.0418266	0.00864664		-0.0023874	0.0305814	0.107274	0.0451559	0.0324844
-21.3235	0	0.0104923	0.0490639	0.0574643	0.0390068	0.014462		-0.0087773	0.0515691	0.10463	0.0491405	0.0327602
-21.1765	0	0.0116982	0.0442919	0.0551617	0.0370506	0.0130588		-0.00569523	0.0553343	0.102032	0.0505569	0.0311897
-21.0294	0	-0.0133492	0.0265409	0.0556882	0.02296	0.0200096		-0.0081273	0.0577139	0.104144	0.0512436	0.0325711
-20.8823	0	-0.027666	0.0188721	0.0555228	0.0155763	0.024071		-0.0129673	0.050041	0.111572	0.0495487	0.0359523
-20.7353	0	-0.015597	0.0280069	0.0588609	0.023757	0.0215989		-0.0242049	0.0474002	0.113475	0.0455568	0.0397555
-20.5882	0	-0.0243527	0.0292736	0.05923	0.0213836	0.0244486		-0.0267464	0.0371809	0.110038	0.0401576	0.0395144
-20.4412	0	-0.0264866	0.0178587	0.0574018	0.016258	0.0242297		-0.0262557	0.0384835	0.0992897	0.0371725	0.0362478
-20.2941	0	-0.0181777	0.0258085	0.0490647	0.0188985	0.0197163		-0.0276276	0.041014	0.0879977	0.0337947	0.0335728
-20.1471	0	-0.0203316	0.0263005	0.0492495	0.0184061	0.0204705		-0.038336	0.0491576	0.0891804	0.033334	0.0376515
-20	0	-0.0213005	0.0264215	0.0499679	0.018363	0.0209642		-0.0496241	0.0459961	0.0978694	0.0314138	0.0431975
-19.8529	0	-0.0142588	0.0330292	0.0495112	0.0227605	0.0191114		-0.0481101	0.0420144	0.096564	0.0301561	0.0421826
-19.7059	0	-0.0174559	0.0362872	0.0510191	0.0232835	0.0208089		-0.0513716	0.0462191	0.0837461	0.0261979	0.0402693
-19.5588	0	-0.0380907	0.012567	0.0491782	0.00788481	0.0253009		-0.047455	0.0429928	0.0772279	0.0242552	0.0371922
-19.4118	0	-0.0373944	0.00530803	0.0430216	0.00364508	0.023229		-0.0380543	0.0473486	0.0749493	0.0280812	0.0340141
-19.2647	0	-0.0526584	0.0225981	0.0418686	0.0039361	0.0288389		-0.0466612	0.0557185	0.0747929	0.0279501	0.0377098
-19.1177	0	-0.0535546	0.0242354	0.04582	0.00550027	0.0301777		-0.0522418	0.0616424	0.073531	0.0276438	0.04009
-18.9706	0	-0.0370207	0.0230404	0.0449781	0.0103326	0.024509		-0.0447188	0.0360097	0.0680691	0.0197867	0.0335543
-18.8235	0	-0.046173	0.0312845	0.0447378	0.00994978	0.0283288		-0.0432604	0.0278175	0.0469031	0.0104868	0.0274325
-18.6765	0	-0.0389591	0.0421562	0.0391921	0.0141297	0.0265582		-0.039811	0.0360747	0.0407688	0.0123442	0.0261128
-18.5294	0	-0.0423441	0.0407452	0.0366256	0.0116756	0.027036		-0.0287811	0.0435034	0.0450221	0.0199148	0.0243519
-18.3823	0	-0.0420137	0.0426848	0.0373071	0.0126594	0.0273806		-0.040547	0.0509444	0.0528075	0.0210683	0.0308123
-18.2353	0	-0.0396804	0.0488289	0.0444209	0.0178565	0.0287966		-0.0374605	0.04406	0.0523017	0.0196337	0.0286461
-18.0882	0	-0.0391759	0.0445086	0.0453375	0.0168901	0.028034		-0.0300796	0.0362089	0.0475976	0.0179089	0.0242185
-17.9412	0	-0.0354258	0.0477589	0.0423185	0.0182172	0.0268674		-0.0209292	0.0428335	0.0422059	0.0213701	0.0211504
-17.7941	0	-0.0344879	0.0385816	0.038582	0.0142253	0.0243566		-0.0206164	0.0527454	0.034334	0.0221543	0.0220359
-17.6471	0	-0.0386616	0.0314561	0.0368366	0.00987705	0.024319		-0.0248563	0.0523206	0.0389177	0.0221274	0.0238083
-17.5	0	-0.047367	0.0194509	0.0419616	0.00468183	0.0268234		-0.030847	0.0372312	0.0421233	0.0161692	0.0235505
-17.3529	0	-0.0416384	0.0177735	0.0447543	0.00696311	0.0255184		-0.0399299	0.0257336	0.0468803	0.0108947	0.0261352
-17.2059	0	-0.0313143	0.0142557	0.042279	0.0084068	0.0214449		-0.0146236	0.0266652	0.0367432	0.0162616	0.0157142
-17.0588	0	-0.0315701	0.0272302	0.0339651	0.00987509	0.0208136		-0.0144867	0.0301082	0.0285708	0.0147307	0.0146155
-16.9118	0	-0.0110428	0.014653	0.030973	0.0115277	0.0122292		-0.0053323	0.0336137	0.0239669	0.0174161	0.0117101
-16.7647	0	-0.0103069	0.0149808	0.0257861	0.0101533	0.0106951		-0.00556461	0.032391	0.0246864	0.0171709	0.0115833
-16.6177	0	-0.016493	0.033239	0.0280865	0.0149441	0.0157888		-1.56144e-05	0.0473309	0.0334145	0.0269099	0.0140494
-16.4706	0	0.00849981	0.0275006	0.0301696	0.0220566	0.00682207		0.0312437	0.0437267	0.0321859	0.0357187	0.00401319
-16.3235	0	0.031629	0.0424658	0.025548	0.0332143	0.00494765		0.0484333	0.058298	0.025342	0.0440244	0.00976563
-16.1765	0	0.0460271	0.055968	0.0184448	0.0401466	0.011224		0.0507622	0.0630272	0.00814752	0.0406456	0.0166303
-16.0294	0	0.0565096	0.0697519	0.0112788	0.0458468	0.0177017		0.028092	0.0636777	0.00403003	0.0319332	0.0173256
-15.8824	0	0.0436814	0.0669406	0.0093713	0.0399978	0.0167206		0.0281407	0.0723627	0.00681246	0.035772	0.0193036
-15.7353	0	0.0396324	0.0817973	0.00876262	0.0433974	0.0211672		0.023646	0.0874253	0.0145097	0.0418604	0.0229346
-15.5882	0	0.046287	0.0948599	0.0102092	0.050452	0.0245251		0.021768	0.0904271	0.0143489	0.0421814	0.0242178
-15.4412	0	0.0425355	0.0870379	0.00356139	0.0443783	0.0241152		0.0105052	0.0836276	-0.00245199	0.0305602	0.026796
-15.2941	0	0.0336743	0.106836	-0.00811463	0.044132	0.0335929		-0.00783765	0.109625	-0.0108498	0.0303125	0.0396657
-15.1471	0	0.0164261	0.0986976	-0.00736316	0.0359202	0.0321312		-0.0214328	0.103571	-0.0101596	0.0239927	0.0399218
-15	0	0.00421749	0.0916796	-0.00739445	0.0295009	0.0312695		-0.0281849	0.12873	0.00149941	0.0340148	0.0481266
-14.8529	0	0.00504624	0.0953352	-0.00233479	0.0326822	0.0313989		-0.0264007	0.140347	0.0103627	0.0414364	0.0505813
-14.7059	0	0.0260524	0.0901704	0.00200766	0.0394101	0.0263122		-0.0352873	0.148181	0.00784579	0.0402465	0.055385
-14.5588	0	0.0127799	0.0836393	0.00154969	0.0326563	0.0256968		-0.0422988	0.125091	-0.00484111	0.0259836	0.0507196
-14.4118	0	0.0124063	0.0604956	-0.00252353	0.0234595	0.019013		-0.0320312	0.119534	-0.0138528	0.02455	0.047781
-14.2647	0	0.0172834	0.0673979	-0.00560335	0.0263593	0.0215567		-0.0335973	0.12815	-0.00822092	0.0287774	0.0502236
-14.1176	0	0.0146028	0.054723	-0.00170264	0.022541	0.0167653		-0.0339107	0.103248	0.00592645	0.025088	0.040737
-13.9706	0	0.00409674	0.0601787	-0.00282407	0.0204838	0.0199478		-0.0071374	0.098931	0.00914697	0.0336469	0.0329788
-13.8235	0	0.0135372	0.0583724	-0.0047293	0.0223934	0.0187464		0.00595221	0.0758247	0.000339012	0.027372	0.0242805
-13.6765	0	0.0209782	0.0505481	-0.00859369	0.0209776	0.0170728		0.026818	0.0739269	-0.0134461	0.0290996	0.0252482
-13.5294	0	0.0238709	0.0472236	-0.0166713	0.0181411	0.0186661		0.0535669	0.0603155	-0.0208334	0.0310163	0.0259979
-13.3824	0	0.0128513	0.0502774	-0.021022	0.0140356	0.0205909		0.0676867	0.0750817	-0.014357	0.0428038	0.02866
-13.2353	0	0.00155187	0.0741072	-0.0190038	0.0188851	0.0282415		0.0552726	0.0864204	-0.0068068	0.0449621	0.0274017
-13.0882	0	0.00746713	0.077724	-0.0145675	0.0235412	0.0278281		0.0769111	0.078121	-0.00135085	0.0512271	0.0262913
-12.9412	0	0.0276001	0.0806972	-0.0143933	0.0313014	0.0275126		0.0878402	0.0748988	-0.0111496	0.0505298	0.0310651
-12.7941	0	0.0605112	0.0764149	-0.0192856	0.0392135	0.0296077		0.0614886	0.0948537	-0.0192988	0.0456811	0.0338876
-12.6471	0	0.0871966	0.0733925	-0.0216609	0.0463094	0.034218		0.0644326	0.111831	-0.022571	0.0512308	0.039356
-12.5	0	0.0588137	0.0761523	-0.0219736	0.0376641	0.030236		0.0518054	0.119687	-0.0150699	0.0521407	0.0389012
-12.3529	0	0.0395129	0.0795594	-0.0145627	0.0348365	0.0272711		0.0308469	0.128462	-0.00366168	0.0518823	0.0395643
-12.2059	0	0.0632062	0.0630255	-0.00998107	0.0387502	0.0243657		0.02251	0.13235	-0.000340138	0.0515066	0.0409564
-12.0588	0	0.0578673	0.0467971	-0.00782449	0.03228	0.0203053		0.0126577	0.133927	-0.00566669	0.0469727	0.0437979
-11.9118	0	0.0534933	0.0341946	-0.0104772	0.0257369	0.0189447		0.00106037	0.129813	-0.0135006	0.0391244	0.0455389
-11.7647	0	0.0466735	0.0365972	-0.0119892	0.0237605	0.01811		0.00206657	0.145898	-0.0163348	0.0438766	0.0512866
-11.6176	0	0.0277377	0.0452252	-0.0105069	0.0208187	0.0164562		0.0119388	0.138856	-0.00997809	0.0469388	0.0463919
-11.4706	0	0.00221459	0.0600682	-0.00242248	0.0199534	0.020102		-0.00363728	0.138564	0.0040981	0.0463415	0.0461651
-11.3235	0	0.0179365	0.0664178	0.00282204	0.0290588	0.0191823		0.0161699	0.112462	0.00711197	0.0452481	0.0337087
-11.1765	0	0.0514201	0.0617238	-0.00162216	0.0371739	0.0196248		0.0357944	0.111515	-0.000135992	0.0490576	0.0329059
-11.0294	0	0.0539302	0.084314	-0.00755356	0.0435635	0.0270217		0.0459296	0.0960019	-0.0108554	0.043692	0.0308673
-10.8824	0	0.0669227	0.0825585	-0.0147057	0.0449252	0.0301551		0.05784	0.0914421	-0.0101934	0.0463629	0.0298956
-10.7353	0	0.0629951	0.0945385	-0.0137866	0.0479157	0.0321669		0.054282	0.090644	-0.00352202	0.0471347	0.0274173
-10.5882	0	0.0618323	0.0911035	-0.0129871	0.0466495	0.0309925		0.0438745	0.0938369	0.00398576	0.0472324	0.0259921
-10.4412	0	0.0603451	0.08766	-0.0123309	0.0452248	0.0298385		0.0486901	0.0908663	0.00137825	0.0469782	0.0258472
-10.2941	0	0.0628175	0.0868986	-0.0167239	0.0443307	0.0313088		0.0806441	0.0706861	-0.0119326	0.0464659	0.0293404
-10.1471	0	0.0695115	0.0849222	-0.0278999	0.0421779	0.0353202		0.0714719	0.0613311	-0.0242156	0.0361958	0.0303472
-10	0	0.0412956	0.0863891	-0.0293189	0.0327886	0.0336717		0.0615504	0.0625148	-0.0217408	0.0341081	0.0279258
-9.85294	0	0.0302986	0.0827813	-0.0254049	0.029225	0.0312353		0.0534397	0.0550878	-0.0130321	0.0318318	0.022437
-9.70588	0	0.0339974	0.0928503	-0.0176722	0.0363918	0.0319275		0.0504862	0.049261	-0.00834972	0.0304658	0.019411
-9.55882	0	0.0438355	0.0808757	-0.0135629	0.0370494	0.0274724		0.0716769	0.0504457	-0.0123208	0.0366006	0.0252169
-9.41177	0	0.0390896	0.0831016	-0.0166082	0.0351943	0.0288495		0.0784127	0.0474419	-0.0208445	0.0350033	0.0293203
-9.26471	0	0.0412789	0.094622	-0.0187003	0.0390669	0.032732		0.0715502	0.0640361	-0.0308659	0.0349068	0.0329578
-9.11765	0	0.0361191	0.08911	-0.021574	0.0345517	0.0319613		0.0424332	0.0566243	-0.0266836	0.0241246	0.0257323
-8.97059	0	0.0125656	0.0963816	-0.0169673	0.0306599	0.0339487		0.0299989	0.086855	-0.0127257	0.0347094	0.0288428
-8.82353	0	0.00331191	0.103407	-0.0122459	0.031491	0.0362374		0.0275987	0.0790089	-0.0122213	0.0314621	0.0264067
-8.67647	0	0.0114773	0.0948319	-0.00973008	0.032193	0.0319122		0.0333798	0.0919328	-0.0122301	0.0376942	0.0301465
-8.52941	0	0.00723698	0.0844304	-0.0122474	0.0264733	0.0295193		0.0646092	0.0842393	-0.0220667	0.0422606	0.032659
-8.38235	0	-0.00461929	0.0983793	-0.0207204	0.0243465	0.0373071		0.0643979	0.0771723	-0.0272538	0.0381055	0.032887
-8.23529	0	-0.0240831	0.103474	-0.0173159	0.0206916	0.0414371		0.0487578	0.0536282	-0.0263171	0.0253563	0.0258749
-8.08823	0	-0.0353729	0.100813	-0.014999	0.0168138	0.0424096		0.0467688	0.0370701	-0.0125522	0.0237622	0.0183718
-7.94118	0	-0.0383265	0.0945467	-0.0145613	0.0138863	0.0409095		0.0567615	0.0416847	-0.0111956	0.0290835	0.0206045
-7.79412	0	-0.0197681	0.0841611	-0.0150017	0.0164637	0.0338766		0.0650089	0.0103396	-0.0223232	0.0176751	0.025476
-7.64706	0	-0.00774234	0.0755659	-0.0199655	0.0159527	0.0300147		0.0627405	0.0116017	-0.0329761	0.0137887	0.0276526
-7.5	0	-0.0117671	0.0804468	-0.0287805	0.0132997	0.0339309		0.0445144	0.00288717	-0.0414271	0.0019915	0.0248132
-7.35294	0	-0.018049	0.0863104	-0.0349732	0.0110961	0.0379232		-0.00878687	0.0192433	-0.0398725	-0.00980534	0.0170729
-7.20588	0	-0.0180005	0.0798387	-0.0299273	0.010637	0.0347717		-0.0284514	0.0184914	-0.0313051	-0.013755	0.0161443
-7.05882	0	-0.021578	0.0686551	-0.0292646	0.0059375	0.0314372		-0.0143351	0.0336822	-0.0303231	-0.00365867	0.0192324
-6.91176	0	-0.0129909	0.0503053	-0.0307861	0.0021761	0.0246068		-0.016809	0.0199964	-0.0414062	-0.0127396	0.0178418
-6.76471	0	-0.00724202	0.0577261	-0.0359863	0.00483258	0.0277179		-0.0113621	0.0300661	-0.0558177	-0.0123712	0.0247976
-6.61765	0	-0.00579646	0.0606327	-0.0389828	0.00528446	0.0292854		-0.0193479	0.0528618	-0.0625254	-0.00967051	0.033659
-6.47059	0	-0.00707726	0.0609815	-0.0404422	0.00448734	0.029844		-0.0415115	0.0513658	-0.0528839	-0.0143432	0.0330181
-6.32353	0	-0.0145429	0.057171	-0.0334474	0.00306023	0.0276003		-0.0491176	0.0577812	-0.0406936	-0.0106767	0.0343152
-6.17647	0	-0.0235151	0.0536856	-0.0305575	-0.000129008	0.026984		-0.0406443	0.0530888	-0.0365883	-0.00804793	0.0305908
-6.02941	0	-0.00657913	0.0419329	-0.0329527	0.000800359	0.0219302		-0.0323692	0.0600192	-0.0447397	-0.00569657	0.0330513
-5.88235	0	0.00418529	0.040716	-0.0377531	0.00238272	0.02267		-0.0342689	0.0571778	-0.0544711	-0.0105207	0.034348
-5.73529	0	-0.00695269	0.0501062	-0.0411296	0.00067464	0.0266122		-0.0266142	0.0753231	-0.051908	-0.00106637	0.0388864
-5.58824	0	-0.0221212	0.0460564	-0.0366566	-0.00424045	0.0254961		-0.0475111	0.0610153	-0.0371554	-0.00788373	0.034579
-5.44118	0	-0.0438214	0.0372221	-0.0342047	-0.0136013	0.0255629		-0.0551273	0.053562	-0.020622	-0.00739578	0.0320652
-5.29412	0	-0.0466701	0.0266003	-0.0295858	-0.0165519	0.0221325		-0.0436193	0.0573107	-0.0242499	-0.00351949	0.0309248
-5.14706	0	-0.028384	0.0335992	-0.0317796	-0.00885481	0.0212496		-0.023607	0.0583906	-0.033433	0.000450197	0.0291087
-5	0	-0.00953117	0.0321052	-0.0324679	-0.00329796	0.0188994		0.0131484	0.0505137	-0.0434694	0.00673089	0.0273197
-4.85294	0	-0.0280123	0.0388702	-0.0340809	-0.00774099	0.0233714		0.00166264	0.0453553	-0.041911	0.0017023	0.0251916
-4.70588	0	-0.0367348	0.04853	-0.029115	-0.00577326	0.0272406		-0.00593179	0.044552	-0.0287935	0.00327558	0.0216677
-4.55882	0	-0.0325514	0.0430868	-0.0234188	-0.0042945	0.0238369		-0.015452	0.0318108	-0.024201	-0.00261405	0.0173968
-4.41176	0	-0.0222211	0.0411034	-0.0223279	-0.00114851	0.021126		0.00668407	0.0468224	-0.0278495	0.00855233	0.0215762
-4.26471	0	-0.0100235	0.0451174	-0.0250173	0.00335886	0.0213232		0.00716657	0.045678	-0.0396292	0.00440512	0.0246647
-4.11765	0	-0.00713757	0.049023	-0.0324531	0.00314409	0.0240754		0.0114933	0.0440422	-0.0408125	0.00490767	0.0247158
-3.97059	0	-0.0187896	0.0317633	-0.0355233	-0.00751654	0.0202253		-0.00139883	0.0395657	-0.0399077	-0.000580294	0.0229456
-3.82353	0	-0.0393609	0.0469182	-0.0341318	-0.00885817	0.027929		-0.0414541	0.0342985	-0.0304914	-0.012549	0.0236365
-3.67647	0	-0.0377716	0.0396681	-0.031352	-0.00981848	0.0248126		-0.0263155	0.0340968	-0.0313163	-0.007845	0.0210205
-3.52941	0	-0.0204309	0.0354262	-0.0353884	-0.0067977	0.021549		-0.0301926	0.0330043	-0.0408876	-0.012692	0.0230558
-3.38235	0	-0.0127715	0.0306571	-0.0421045	-0.00807295	0.0211354		-0.0191568	0.0371079	-0.054217	-0.0120886	0.026599
-3.23529	0	-0.00953743	0.0348179	-0.0471004	-0.00727331	0.0236749		-0.0382001	0.0349371	-0.057857	-0.0203734	0.0282314
-3.08824	0	-0.00121187	0.0438639	-0.048119	-0.00182232	0.0265549		-0.0341322	0.0352523	-0.0476328	-0.0155042	0.0256758
-2.94118	0	-0.00914812	0.0542348	-0.0415368	0.00118328	0.0281254		-0.0386604	0.0290619	-0.0363739	-0.0153242	0.0222028
-2.79412	0	-0.0159904	0.0681142	-0.0397977	0.00410869	0.0327324		-0.0249516	0.0172529	-0.0375921	-0.0150969	0.0165814
-2.64706	0	-0.0100314	0.049856	-0.0393978	0.000142275	0.0262627		-0.0151575	0.0104937	-0.0423714	-0.0156784	0.0152631
-2.5	0	-0.0171112	0.0613603	-0.0460303	-0.000593724	0.0320822		-0.0282505	0.0094895	-0.0486686	-0.0224765	0.0170352
-2.35294	0	-0.0202299	0.0496849	-0.0472933	-0.00594613	0.0288918		-0.0253198	0.0201219	-0.0453301	-0.0168426	0.0193639
-2.20588	0	-0.0435996	0.0641994	-0.0446182	-0.00800611	0.036104		-0.0397163	0.0143831	-0.0301748	-0.0185027	0.016672
-2.05882	0	-0.0481401	0.061876	-0.0383616	-0.00820855	0.0351558		-0.0328123	0.0249585	-0.0226683	-0.010174	0.0178087
-1.91176	0	-0.0789499	0.0598396	-0.0311038	-0.016738	0.0407039		-0.0426515	0.0255641	-0.0237995	-0.0136289	0.0203382
-1.76471	0	-0.0950458	0.0585385	-0.033044	-0.0231838	0.0446093		-0.0327481	0.0243282	-0.0353533	-0.014591	0.0194742
-1.61765	0	-0.0968532	0.0489963	-0.0353975	-0.0277515	0.0422763		-0.0355438	0.0387068	-0.0367088	-0.0111819	0.0249466
-1.47059	0	-0.0909438	0.0451161	-0.0373935	-0.0277404	0.0395726		-0.0391889	0.0561829	-0.0297242	-0.00424341	0.0303364
-1.32353	0	-0.0971422	0.0377107	-0.0301287	-0.0298534	0.0389289		-0.0574255	0.0510689	-0.0218547	-0.00940377	0.0319324
-1.17647	0	-0.107872	0.0483739	-0.0257197	-0.0284059	0.0451243		-0.061078	0.0658236	-0.0117955	-0.00234996	0.0369365
-1.02941	0	-0.0899735	0.0379866	-0.0203256	-0.0241042	0.0369872		-0.0568276	0.0646259	-0.0140891	-0.00209696	0.0355696
-0.882353	0	-0.0844221	0.0278275	-0.0205923	-0.025729	0.0325053		-0.0610394	0.0450156	-0.0213239	-0.0124492	0.0309353
-0.735294	0	-0.0622152	0.00611942	-0.0236737	-0.0265898	0.0197803		-0.0491838	0.0397809	-0.0292779	-0.0128936	0.0269569
-0.588235	0	-0.039998	0.00682023	-0.0238667	-0.0190148	0.0137312		-0.0577529	0.0424013	-0.0253869	-0.0135795	0.0295086
-0.441176	0	-0.0382066	0.00695525	-0.0182045	-0.0164853	0.0130654		-0.0639171	0.0395431	-0.0139993	-0.0127911	0.0298725
-0.294118	0	-0.0576621	0.00801808	-0.010632	-0.020092	0.0195413		-0.0565534	0.0408348	-0.00893737	-0.00821864	0.0281159
-0.147059	0	-0.0345182	0.00724058	-0.00958005	-0.0122859	0.0121304		-0.0313313	0.0441651	-0.00820781	0.001542	0.0223325
0	1	-0.0181762	-0.00325791	-0.00749705	-0.00964373	0.00443829		-0.00981204	0.028945	-0.0109606	0.00272412	0.0131146
0.147059	1	-0.012131	-0.0104034	-0.0100682	-0.0108675	0.000639103		0.00664715	0.0222193	-0.0146837	0.00472758	0.0106961
0.294118	1	-0.00767412	0.00095081	-0.00880919	-0.0051775	0.00308162		0.0109915	0.020583	-0.00607016	0.00850146	0.00779419
0.441177	1	-0.00985336	0.0125359	-0.00785441	-0.00172397	0.00715323		0.0046479	0.0174203	0.00407241	0.00871354	0.00435655
0.588235	1	-0.00807745	-0.000370192	-0.000681572	-0.00304307	0.00251879		0.0138906	0.0132252	0.0029837	0.0100332	0.00352997
0.735294	1	0.0222145	-0.00119569	-0.000279047	0.00691325	0.00765519		0.0413671	0.026838	-0.00521665	0.0209962	0.0137611
0.882353	1	0.0939908	0.0418663	0.00488442	0.0469139	0.0258463		0.0839649	0.0433202	-0.0100828	0.0390674	0.0272324
1.02941	1	0.174026	0.107222	0.0209151	0.100721	0.0443187		0.123946	0.116855	0.00411355	0.081638	0.0388162
1.17647	1	0.243019	0.170401	0.0358195	0.149746	0.0606984		0.160987	0.150756	0.0168762	0.10954	0.0464258
1.32353	1	0.346336	0.236029	0.0551648	0.21251	0.0848726		0.208317	0.231709	0.0338223	0.157949	0.0624298
1.47059	1	0.439976	0.284498	0.0719054	0.26546	0.106678		0.279513	0.306189	0.0441755	0.209959	0.0832487
1.61765	1	0.547006	0.343024	0.0918397	0.32729	0.131631		0.358216	0.359449	0.0491613	0.255609	0.103224
1.76471	1	0.629748	0.409299	0.10299	0.380679	0.152734		0.410222	0.419505	0.0634688	0.297732	0.117162
1.91176	1	0.69115	0.47606	0.115747	0.427652	0.167859		0.447408	0.464343	0.0673226	0.326358	0.12961
2.05882	1	0.704234	0.496507	0.118718	0.43982	0.171384		0.46524	0.498908	0.0799493	0.348032	0.134393
2.20588	1	0.708141	0.490532	0.113905	0.437526	0.173576		0.494382	0.482853	0.0755775	0.350937	0.13772
2.35294	1	0.701176	0.458572	0.10166	0.420469	0.174111		0.487318	0.484398	0.0661196	0.345945	0.139915
2.5	1	0.646275	0.4321	0.0887984	0.389058	0.162362		0.475027	0.461627	0.0521839	0.329613	0.138768
2.64706	1	0.614858	0.41	0.078738	0.367865	0.156192		0.451482	0.428674	0.0430269	0.307727	0.132514
2.79412	1	0.560946	0.404489	0.0649665	0.343467	0.146392		0.406462	0.423856	0.0330235	0.28778	0.127477
2.94118	1	0.532514	0.385526	0.0536158	0.323885	0.14164		0.368993	0.412516	0.0246941	0.268735	0.122665
3.08824	1	0.515616	0.367745	0.047875	0.310412	0.138035		0.350571	0.39501	0.0319912	0.259191	0.114322
3.23529	0	0.510292	0.333023	0.0474271	0.296914	0.134832		0.337436	0.3821	0.0242583	0.247931	0.112577
3.38235	0	0.477759	0.306976	0.0423383	0.275691	0.126665		0.309733	0.355804	0.0177688	0.227769	0.105839
3.52941	0	0.468167	0.31698	0.0431958	0.276114	0.124369		0.294959	0.341653	0.0121414	0.216251	0.102941
3.67647	0	0.476226	0.297249	0.0411053	0.271527	0.126265		0.267837	0.315218	0.0125826	0.198546	0.0939822
3.82353	0	0.467825	0.283467	0.0414357	0.264243	0.123463		0.252147	0.306605	0.0181963	0.192316	0.0884678
3.97059	0	0.4823	0.260792	0.0462367	0.263109	0.125886		0.271731	0.290166	0.0310035	0.197633	0.0834847
4.11765	0	0.488783	0.257641	0.0503516	0.265592	0.126627		0.285737	0.259217	0.0298963	0.191617	0.0812217
4.26471	0	0.469113	0.23767	0.0507556	0.252513	0.120997		0.271952	0.237402	0.0164413	0.175265	0.0800357
4.41176	0	0.490014	0.226963	0.0464354	0.254471	0.128787		0.261025	0.207709	0.00520047	0.157978	0.0779238
4.55882	0	0.48784	0.217656	0.045214	0.250237	0.128809		0.238222	0.200397	0.00586404	0.148161	0.0719815
4.70588	0	0.48212	0.205666	0.0507669	0.246184	0.126158		0.236135	0.202482	0.0169181	0.151845	0.0681593
4.85294	0	0.49436	0.207334	0.0605897	0.254094	0.127383		0.260494	0.220082	0.0288423	0.169806	0.0714409
5	0	0.485736	0.21696	0.0662969	0.256331	0.122672		0.25621	0.204474	0.0278635	0.162849	0.0691255
5.14706	0	0.482048	0.213537	0.0655591	0.253715	0.121897		0.276876	0.179795	0.0201299	0.158933	0.0748465
5.29412	0	0.455913	0.196298	0.0669822	0.239731	0.114356		0.263959	0.186471	0.0207724	0.157067	0.0717248
5.44118	0	0.462995	0.197456	0.0709444	0.243798	0.115523		0.246839	0.17778	0.0357063	0.153442	0.0621516
5.58824	0	0.427215	0.205987	0.0785966	0.237266	0.101845		0.230497	0.163441	0.0542219	0.149387	0.0513692
5.73529	0	0.43119	0.19643	0.0863264	0.237982	0.101698		0.253787	0.162711	0.0692712	0.161923	0.0532665
5.88235	0	0.426133	0.203088	0.0907933	0.240005	0.0985485		0.259382	0.13517	0.077541	0.157364	0.0536533
6.02941	0	0.396148	0.20671	0.0900737	0.230977	0.0891853		0.250955	0.111612	0.0746838	0.14575	0.0536717
6.17647	0	0.385428	0.181264	0.0902826	0.218992	0.0872645		0.256024	0.11723	0.0737308	0.148995	0.054968
6.32353	0	0.338708	0.168627	0.0992244	0.202186	0.0711401		0.207599	0.144323	0.0856561	0.145859	0.0352102
6.47059	0	0.323284	0.176598	0.105935	0.201939	0.06401		0.212337	0.140497	0.101538	0.151457	0.0324509
6.61765	0	0.304749	0.179619	0.116431	0.200266	0.0553344		0.235079	0.13844	0.111244	0.161588	0.037575
6.76471	0	0.305327	0.180557	0.121768	0.202551	0.0541181		0.26536	0.154629	0.112577	0.177522	0.0455659
6.91176	0	0.282555	0.190553	0.120553	0.197887	0.0469096		0.253055	0.15356	0.105644	0.170753	0.0434135
7.05882	0	0.248381	0.176796	0.117432	0.18087	0.0378565		0.236231	0.173049	0.0930941	0.167458	0.0414145
7.20588	0	0.23142	0.173253	0.121039	0.175237	0.0318796		0.204411	0.166677	0.103946	0.158345	0.0292995
7.35294	0	0.216536	0.202002	0.125074	0.181204	0.0283769		0.20225	0.170591	0.117836	0.163559	0.0246206
7.5	0	0.237569	0.21864	0.127045	0.194418	0.0341267		0.208996	0.153251	0.121648	0.161298	0.0255342
7.64706	0	0.266385	0.213576	0.126569	0.202177	0.0407621		0.214175	0.141837	0.119259	0.158424	0.0286275
7.79412	0	0.25885	0.207837	0.119403	0.195363	0.040735		0.206267	0.139981	0.104819	0.150356	0.0297413
7.94118	0	0.242139	0.202554	0.113202	0.185965	0.0381341		0.184328	0.140796	0.103958	0.143027	0.0232275
8.08824	0	0.228288	0.20025	0.119012	0.182517	0.0327678		0.154054	0.14009	0.113037	0.135727	0.0120399
8.23529	0	0.233323	0.197929	0.124277	0.185176	0.0321182		0.161324	0.122777	0.129292	0.137798	0.0119125
8.38235	0	0.243738	0.198223	0.126418	0.189459	0.0341495		0.18587	0.11591	0.12804	0.143273	0.021584
8.52941	0	0.247899	0.184019	0.124858	0.185592	0.0355277		0.185041	0.10074	0.116514	0.134098	0.0258749
8.67647	0	0.215968	0.171067	0.119882	0.168972	0.0277575		0.178993	0.106624	0.107944	0.131187	0.023906
8.82353	0	0.161723	0.166694	0.118266	0.148895	0.0153812		0.146479	0.131588	0.103916	0.127328	0.0124702
8.97059	0	0.145341	0.159935	0.122857	0.142711	0.0107838		0.13122	0.139227	0.121437	0.130628	0.00514393
9.11765	0	0.137523	0.163241	0.130188	0.143651	0.0100215		0.116232	0.126306	0.131986	0.124841	0.00460617
9.26471	0	0.148932	0.167609	0.133522	0.150021	0.00985498		0.130024	0.130842	0.129603	0.130157	0.000363621
9.41176	0	0.147997	0.170928	0.133658	0.150861	0.0108538		0.141105	0.131509	0.116694	0.129769	0.00710033
9.55882	0	0.113078	0.178177	0.131606	0.140954	0.019365		0.127781	0.144053	0.107807	0.126547	0.0104817
9.70588	0	0.113784	0.177616	0.134452	0.141951	0.0188044		0.0976156	0.161444	0.114438	0.124499	0.0190999
9.85294	0	0.114688	0.181407	0.141407	0.145834	0.0193869		0.0972794	0.144535	0.124188	0.122001	0.0136854
10	0	0.13741	0.174405	0.147879	0.153231	0.0110099		0.123233	0.117934	0.135355	0.125507	0.00515586
10.1471	0	0.14439	0.174793	0.146865	0.155349	0.00974789		0.146981	0.115819	0.125816	0.129539	0.00918598
10.2941	0	0.139699	0.171388	0.143035	0.151374	0.0100532		0.179626	0.129423	0.113753	0.140934	0.0198678
10.4412	0	0.120624	0.153321	0.141436	0.13846	0.00955555		0.174261	0.123082	0.106189	0.134511	0.0204646
10.5882	0	0.100119	0.151081	0.140049	0.130416	0.01548		0.138301	0.122663	0.114544	0.125169	0.0069715
10.7353	0	0.104713	0.145046	0.143709	0.131156	0.013227		0.116464	0.127099	0.126432	0.123332	0.00343929
10.8824	0	0.0753731	0.133508	0.146676	0.118519	0.0219052		0.132519	0.119151	0.132788	0.128153	0.00450164
11.0294	0	0.09904	0.121129	0.146675	0.122281	0.0137632		0.122887	0.131929	0.131017	0.128611	0.00287407
11.1765	0	0.111115	0.129462	0.146527	0.129035	0.0102249		0.134619	0.161594	0.120259	0.138824	0.0121162
11.3235	0	0.0941441	0.123896	0.143271	0.120437	0.0142867		0.106307	0.158041	0.123022	0.129123	0.0152427
11.4706	0	0.0772802	0.126778	0.145242	0.116433	0.0202891		0.0567872	0.169387	0.136938	0.121038	0.033463
11.6176	0	0.056601	0.140853	0.147059	0.114838	0.0291734		0.0403207	0.166724	0.150409	0.119151	0.0396957
11.7647	0	0.0708804	0.136506	0.153449	0.120278	0.0251786		0.042536	0.175082	0.157779	0.125132	0.0415991
11.9118	0	0.0776298	0.134211	0.152645	0.121495	0.0225689		0.0719986	0.172946	0.150182	0.131709	0.0305698
12.0588	0	0.0925807	0.144453	0.148309	0.128447	0.0179678		0.0834094	0.160602	0.143087	0.129033	0.0233653
12.2059	0	0.07348	0.150433	0.142501	0.122138	0.0244365		0.0924517	0.151356	0.139511	0.127773	0.0179885
12.3529	0	0.0428599	0.15091	0.13959	0.11112	0.0342861		0.0692461	0.132174	0.146778	0.116066	0.0237866
12.5	0	0.0397595	0.154381	0.142569	0.112237	0.0363987		0.063665	0.147888	0.151686	0.12108	0.0287283
12.6471	0	0.0389576	0.160842	0.142829	0.11421	0.0379836		0.0880111	0.130439	0.142068	0.120173	0.0164275
12.7941	0	0.0647146	0.153789	0.141033	0.119846	0.0278104		0.109344	0.144902	0.131021	0.128423	0.0103466
12.9412	0	0.0817729	0.138813	0.131382	0.117322	0.0179037		0.120374	0.139983	0.109581	0.123312	0.00889841
13.0882	0	0.0831419	0.126762	0.126722	0.112209	0.0145334		0.109986	0.151	0.105977	0.122321	0.0143864
13.2353	0	0.0504012	0.128564	0.125051	0.101339	0.0254888		0.0817942	0.162491	0.104628	0.116304	0.0240155
13.3824	0	0.0375817	0.130808	0.127096	0.0984955	0.0304757		0.0635642	0.172097	0.10819	0.114617	0.0314951
13.5294	0	0.0593731	0.128253	0.123625	0.10375	0.0222287		0.0657387	0.156562	0.100289	0.10753	0.0264673
13.6765	0	0.0828939	0.123924	0.118133	0.108317	0.012821		0.0885414	0.153652	0.0832065	0.108467	0.022645
13.8235	0	0.100933	0.107979	0.108881	0.105931	0.00251269		0.0781218	0.128849	0.0727087	0.0932264	0.0178796
13.9706	0	0.084899	0.108973	0.101858	0.0985767	0.00714064		0.0747514	0.117559	0.0729961	0.0884355	0.0145706
14.1176	0	0.0526273	0.11444	0.102019	0.0896957	0.0188778		0.0648754	0.12736	0.0859647	0.0927334	0.0183526
14.2647	0	0.0379948	0.123497	0.102899	0.0881305	0.0257634		0.0349157	0.133106	0.0860992	0.0847069	0.0283536
14.4118	0	0.0768176	0.109649	0.102687	0.0963844	0.00998771		0.051598	0.133134	0.081568	0.0887665	0.0238109
14.5588	0	0.0880672	0.0870214	0.0963064	0.090465	0.00293627		0.0695562	0.124505	0.0649267	0.0863294	0.0191347
14.7059	0	0.0790966	0.0828236	0.0915295	0.0844832	0.00368374		0.0865241	0.138663	0.0562176	0.0938015	0.0240764
14.8529	0	0.0783599	0.0872831	0.087792	0.0844783	0.00306272		0.0713147	0.124568	0.0571722	0.0843515	0.0205184
15	0	0.0636521	0.0870456	0.0907561	0.0804846	0.00848412		0.0533388	0.146303	0.0606763	0.0867729	0.0298406
15.1471	0	0.0600094	0.0832443	0.0912726	0.0781754	0.00937402		0.0462164	0.146443	0.0593384	0.0839993	0.0314509
15.2941	0	0.103553	0.0872772	0.0921987	0.0943431	0.00481933		0.0561767	0.131998	0.0499109	0.0793618	0.0263801
15.4412	0	0.116067	0.0919248	0.0852698	0.0977539	0.00935598		0.0983841	0.11812	0.0403656	0.0856234	0.0233351
15.5882	0	0.0921051	0.103078	0.0789687	0.0913841	0.00696919		0.0989877	0.104692	0.0372082	0.0802958	0.0216066
15.7353	0	0.0715995	0.127728	0.0785567	0.0926282	0.0176646		0.0775236	0.119075	0.0434169	0.0800052	0.0218759
15.8824	0	0.0538587	0.122253	0.0804771	0.0855296	0.0199046		0.0378157	0.123434	0.0501416	0.0704639	0.0267232
16.0294	0	0.0346128	0.12295	0.0846229	0.0807285	0.0255749		0.0235526	0.131806	0.0546462	0.0700017	0.0321796
16.1765	0	0.0420053	0.131571	0.0833904	0.0856557	0.0258803		0.0598728	0.135364	0.0458865	0.0803746	0.0277898
16.3235	0	0.0746996	0.122031	0.0800187	0.0922496	0.0149695		0.0732857	0.126059	0.0368498	0.0787314	0.0258959
16.4706	0	0.0541058	0.1387	0.0729214	0.0885758	0.025644		0.063609	0.132154	0.0342431	0.0766687	0.0290089
16.6176	0	0.046652	0.138029	0.0722025	0.0856277	0.0272189		0.0406917	0.128126	0.0403628	0.0697267	0.0291997
16.7647	0	0.0463916	0.139888	0.0750487	0.0871096	0.0276557		0.01129	0.155382	0.0380532	0.0682418	0.0442499
16.9118	0	0.0734116	0.1338	0.0742308	0.093814	0.0199942		0.0210165	0.159022	0.0365077	0.0721822	0.0436498
17.0588	0	0.0951325	0.141383	0.0692963	0.101937	0.0210861		0.0536317	0.153482	0.0272967	0.0781367	0.0384318
17.2059	0	0.103335	0.143128	0.064378	0.103614	0.0227337		0.0750288	0.137182	0.0152451	0.0758187	0.0352024
17.3529	0	0.099298	0.134639	0.0601491	0.0980287	0.0215127		0.0642287	0.136699	0.0154174	0.072115	0.0352323
17.5	0	0.0659666	0.147833	0.0565921	0.0901307	0.028978		0.04569	0.150123	0.0226293	0.072814	0.0392234
17.6471	0	0.0317223	0.140124	0.0589636	0.0769367	0.0325577		0.0358053	0.169391	0.033509	0.0795683	0.044916
17.7941	0	0.0382225	0.149091	0.0636548	0.083656	0.033531		0.0560076	0.169285	0.0276633	0.0843187	0.0432641
17.9412	0	0.0548612	0.146607	0.0590608	0.0868428	0.0299064		0.109543	0.154507	0.0213211	0.0951237	0.0391175
18.0882	0	0.0860458	0.156777	0.0541269	0.0989832	0.0303303		0.122562	0.151998	0.0129439	0.0958345	0.0423075
18.2353	0	0.0850634	0.163376	0.0560571	0.101499	0.0320515		0.139419	0.176745	0.0157297	0.110631	0.0486588
18.3824	0	0.0666873	0.169679	0.0587995	0.0983885	0.0357178		0.122398	0.200891	0.0308161	0.118035	0.0491449
18.5294	0	0.0703895	0.1824	0.062464	0.105085	0.0387255		0.110642	0.206848	0.0422967	0.119929	0.0477284
18.6765	0	0.0858114	0.196571	0.0671005	0.116494	0.0404012		0.122	0.212649	0.0407335	0.125128	0.0496525
18.8235	0	0.118481	0.192718	0.0664466	0.125882	0.0366389		0.151738	0.203163	0.0284549	0.127785	0.0518364
18.9706	0	0.133912	0.168241	0.0609969	0.12105	0.0316196		0.173422	0.193316	0.0335083	0.133416	0.0502826
19.1176	0	0.144245	0.172373	0.0650514	0.127223	0.0321289		0.143148	0.208738	0.0441145	0.132	0.0478486
19.2647	0	0.0936974	0.181228	0.0724123	0.115779	0.0332961		0.124236	0.214747	0.0583895	0.132457	0.0453232
19.4118	0	0.0819325	0.1804	0.0788882	0.11374	0.0333414		0.0823493	0.19685	0.0625812	0.113927	0.0418524
19.5588	0	0.102999	0.178722	0.0813393	0.12102	0.0295207		0.0894451	0.201054	0.0508495	0.113783	0.0450355
19.7059	0	0.119876	0.170758	0.0811499	0.123928	0.025947		0.10603	0.205933	0.0405749	0.117513	0.048079
19.8529	0	0.138627	0.155164	0.0809311	0.124907	0.0225004		0.122301	0.20878	0.0354275	0.122169	0.0500426
20	0	0.135597	0.152612	0.0825317	0.12358	0.0211039		0.117791	0.21771	0.0423763	0.125959	0.0507791
20.1471	0	0.130007	0.17842	0.0847715	0.131066	0.0270392		0.0971711	0.225643	0.0467791	0.123198	0.053248
20.2941	0	0.122378	0.182351	0.0849246	0.129885	0.028374		0.100192	0.208565	0.0480661	0.118941	0.0472709
20.4412	0	0.140913	0.169412	0.0771467	0.129157	0.0272757		0.109246	0.221078	0.0344219	0.121582	0.0542348
20.5882	0	0.153764	0.16083	0.0655102	0.126702	0.0306636		0.14592	0.215402	0.0259945	0.129105	0.0553197
20.7353	0	0.145403	0.154376	0.0577376	0.119172	0.0308263		0.191992	0.205502	0.0250179	0.140838	0.058041
20.8824	0	0.135283	0.152613	0.0517369	0.113211	0.0311414		0.170862	0.205134	0.0316262	0.135874	0.0530546
21.0294	0	0.112948	0.159524	0.0486961	0.107056	0.0321286		0.140493	0.192952	0.0356762	0.12304	0.0462325
21.1765	0	0.0981347	0.178555	0.0433686	0.106686	0.0392586		0.114374	0.175098	0.0293836	0.106285	0.0422582
21.3235	0	0.0996185	0.166643	0.0373326	0.101198	0.0373372		0.112729	0.178567	0.0201559	0.103817	0.045946
21.4706	0	0.0993423	0.151315	0.0279701	0.0928759	0.0357532		0.114399	0.164526	0.00681171	0.0952456	0.0465245
21.6176	0	0.116603	0.138717	0.0287065	0.0946756	0.0335966		0.119959	0.143679	0.017623	0.0937536	0.0386762
21.7647	0	0.0965107	0.130269	0.0314826	0.0860874	0.0289894		0.0958303	0.161197	0.0237238	0.0935836	0.0397009
21.9118	0	0.089366	0.127403	0.0339194	0.0835629	0.027142		0.0442959	0.163989	0.0331835	0.0804893	0.0418727
22.0588	0	0.0730806	0.137407	0.0363545	0.0822805	0.0295317		0.0457858	0.160511	0.0244392	0.076912	0.0422513
22.2059	0	0.0662856	0.135593	0.0363738	0.0794176	0.0293852		0.0580218	0.155847	0.015561	0.0764765	0.0415349
22.3529	0	0.0906391	0.118324	0.0382487	0.0824039	0.0234796		0.0926292	0.143985	0.0138984	0.0835042	0.0378289
22.5	0	0.099959	0.109192	0.0429989	0.0840499	0.0206978		0.0872078	0.138284	0.0152321	0.0802414	0.0356925
22.6471	0	0.0872134	0.120335	0.0493911	0.0856465	0.0204947		0.0776109	0.147986	0.0242205	0.0832725	0.03584
22.7941	0	0.0587731	0.136697	0.0543361	0.0832686	0.0267447		0.0763341	0.142682	0.0228728	0.0806297	0.0346526
22.9412	0	0.0699233	0.137602	0.0601245	0.0892167	0.0243576		0.0727077	0.13077	0.0225485	0.0753421	0.0312687
23.0882	0	0.0820146	0.146397	0.0591144	0.095842	0.0261276		0.0760736	0.141076	0.0126018	0.0765839	0.0370883
23.2353	0	0.107352	0.128751	0.0579647	0.0980225	0.0209599		0.0890837	0.130056	0.00883911	0.0759929	0.0355992
23.3824	0	0.125241	0.114024	0.0567338	0.0986664	0.0212149		0.0917989	0.116443	0.0133455	0.0738623	0.0310835
23.5294	0	0.106049	0.129229	0.0571044	0.0974607	0.0212587		0.0831844	0.127989	0.0212604	0.0774778	0.0309416
23.6765	0	0.0798286	0.136854	0.0552382	0.0906402	0.0241726		0.0668981	0.12898	0.020172	0.0720168	0.0315144
23.8235	0	0.0679562	0.142824	0.053945	0.0882416	0.0275891		0.0598493	0.135292	0.00920081	0.0681141	0.0366332
23.9706	0	0.0911087	0.131164	0.0445296	0.0889343	0.025033		0.0778599	0.1317	-0.00852624	0.0670111	0.0408415
24.1176	0	0.106393	0.141384	0.0341262	0.0939677	0.0315798		0.0900801	0.117006	-0.0156663	0.0638067	0.0404896
24.2647	0	0.108597	0.131815	0.0345341	0.0916488	0.0293334		0.101711	0.0850243	-0.00689934	0.0599452	0.0337676
24.4118	0	0.103509	0.137837	0.0346175	0.091988	0.0303487		0.0953827	0.101284	0.00619182	0.0676194	0.030761
24.5588	0	0.0913358	0.148748	0.0368126	0.0922989	0.0323166		0.077649	0.106151	0.0086291	0.0641429	0.0289507
24.7059	0	0.101885	0.149255	0.0357149	0.0956183	0.0329257		0.0535732	0.100716	-0.00223043	0.0506861	0.029753
24.8529	0	0.106452	0.148718	0.028643	0.0946043	0.0351652		0.0682583	0.0914638	-0.00744683	0.0507584	0.0298637
25	0	0.135923	0.142628	0.023788	0.10078	0.0385445		0.0990063	0.0861939	-0.000995815	0.0614015	0.0314171
25.1471	0	0.136173	0.14041	0.0282833	0.101622	0.0366898		0.106404	0.0715274	0.0169388	0.0649568	0.0260346
25.2941	0	0.125929	0.143855	0.035543	0.101776	0.0335181		0.109236	0.0673629	0.0296432	0.0687472	0.0229868
25.4412	0	0.129573	0.150625	0.0336928	0.10463	0.0359856		0.110799	0.0652132	0.0191663	0.0650593	0.0264521
25.5882	0	0.117658	0.145711	0.0339765	0.099115	0.0335609		0.113847	0.0520224	0.0115148	0.0591281	0.0297537
25.7353	0	0.119432	0.142737	0.0249092	0.0956928	0.0360255		0.16116	0.0702352	0.00255631	0.0779839	0.0459487
25.8824	0	0.128218	0.132619	0.0222868	0.0943745	0.0360663		0.207186	0.0620132	0.00594605	0.091715	0.0599611
26.0294	0	0.147389	0.130901	0.0274385	0.10191	0.0375385		0.230644	0.0781433	0.016254	0.108347	0.063705
26.1765	0	0.131416	0.131606	0.0332111	0.0987443	0.0327667		0.20984	0.0902726	0.0192716	0.106461	0.0556045
26.3235	0	0.118175	0.141548	0.0306561	0.0967931	0.0337498		0.159125	0.103851	0.0112956	0.0914238	0.0431247
26.4706	0	0.126852	0.134406	0.0282445	0.0965007	0.0341977		0.158623	0.121791	-0.00707408	0.0911133	0.0502319
26.6176	0	0.126977	0.131556	0.0246264	0.0943865	0.0349051		0.152172	0.13362	-0.0125103	0.0910939	0.0520782
26.7647	0	0.156598	0.128698	0.0236746	0.10299	0.0404673		0.171302	0.131128	-0.0124764	0.0966511	0.0557826
26.9118	0	0.174864	0.117728	0.0324899	0.108361	0.0413658		0.168131	0.126304	-0.00235279	0.0973607	0.051298
27.0588	0	0.157652	0.11207	0.0403293	0.10335	0.0341475		0.14184	0.126393	0.00537662	0.0912031	0.0431443
27.2059	0	0.13795	0.120073	0.044098	0.100707	0.0287711		0.112802	0.13439	-0.00027814	0.0823046	0.041759
27.3529	0	0.151909	0.116138	0.0421893	0.103412	0.0323063		0.120893	0.122629	-0.0123292	0.0770645	0.0446996
27.5	0	0.157945	0.105745	0.0412752	0.101655	0.0337417		0.139175	0.140954	-0.0147074	0.0884739	0.0515932
27.6471	0	0.168799	0.11151	0.0399454	0.106751	0.0372729		0.146257	0.128845	-0.00264479	0.0908191	0.0470015
27.7941	0	0.196633	0.109575	0.0434285	0.116545	0.0443634		0.168842	0.140328	0.00895404	0.106041	0.0492366
27.9412	0	0.175316	0.128928	0.0455482	0.116598	0.0379648		0.163965	0.145962	0.00786535	0.105931	0.0493074
28.0882	0	0.162128	0.145949	0.0446075	0.117562	0.0367748		0.140113	0.153872	-0.0015207	0.0974882	0.0496636
28.2353	0	0.182149	0.137003	0.0339262	0.117693	0.0438642		0.14914	0.159462	-0.0182345	0.0967891	0.0575889
28.3824	0	0.213874	0.12688	0.0292423	0.123332	0.053328		0.190929	0.14033	-0.021831	0.103143	0.0641712
28.5294	0	0.25624	0.114955	0.0282705	0.133155	0.0664353		0.222734	0.128339	-0.0104927	0.113527	0.067733
28.6765	0	0.259041	0.118671	0.0314188	0.136377	0.0663024		0.254636	0.106166	-0.00137252	0.11981	0.0742175
28.8235	0	0.239173	0.122489	0.0321948	0.131285	0.0599111		0.248582	0.105247	-0.00749769	0.115444	0.0740994
28.9706	0	0.199953	0.114823	0.0293583	0.114711	0.0492464		0.232066	0.0975113	-0.0174948	0.104027	0.0721156
29.1176	0	0.217424	0.103824	0.0240374	0.115095	0.0561096		0.230749	0.0849138	-0.0178365	0.0992753	0.0721187
29.2647	0	0.222147	0.100619	0.0194968	0.114088	0.0588865		0.245503	0.0653616	-0.0175448	0.0977732	0.0776453
29.4118	0	0.215134	0.110191	0.0223164	0.11588	0.0557341		0.249192	0.0708968	-0.00463757	0.10515	0.0752491
29.5588	0	0.20973	0.106824	0.0260013	0.114185	0.0531655		0.23718	0.0871735	0.00438818	0.109581	0.0681287
29.7059	0	0.162289	0.116255	0.0240896	0.100878	0.0406289		0.188222	0.105522	0.00209491	0.0986129	0.0538413
29.8529	0	0.163294	0.102031	0.0182656	0.0945301	0.0420337		0.159013	0.133539	-0.016727	0.0919416	0.0548297
30	0	0.170885	0.0993815	0.0116676	0.0939781	0.0460415		0.160068	0.147554	-0.0229736	0.0948828	0.0590388
30.1471	0	0.182477	0.100162	0.00862191	0.0970873	0.0502113		0.188073	0.153386	-0.0226604	0.106266	0.0652364
30.2941	0	0.168296	0.0942811	0.00651582	0.0896978	0.0467582		0.219671	0.170522	-0.018264	0.123976	0.0725216
30.4412	0	0.174343	0.0889909	0.00465981	0.0893311	0.0489835		0.218666	0.191143	-0.0181546	0.130551	0.0747764
30.5882	0	0.170643	0.0916071	0.00391263	0.0887209	0.0481525		0.204897	0.196512	-0.0296406	0.123923	0.0768198
30.7353	0	0.158181	0.0865346	9.68002e-05	0.081604	0.0457014		0.167252	0.180556	-0.0417952	0.102004	0.0720022
30.8824	0	0.165164	0.0809677	-0.00349245	0.0808798	0.048687		0.185727	0.164833	-0.0488231	0.100579	0.0749443
31.0294	0	0.180109	0.095078	-0.00306056	0.090709	0.0529217		0.202352	0.127876	-0.0418556	0.0961243	0.0722623
31.1765	0	0.185045	0.0903315	0.00613439	0.093837	0.0516768		0.222602	0.105947	-0.0300388	0.0995035	0.0730023
31.3235	0	0.204865	0.0803406	0.0110516	0.0987522	0.0567013		0.207187	0.0914832	-0.0227778	0.091964	0.0663855
31.4706	0	0.215133	0.082254	0.0113749	0.102921	0.0597206		0.174713	0.0778387	-0.0313942	0.073719	0.0595335
31.6176	0	0.209576	0.0911844	0.00894426	0.103235	0.0582301		0.15902	0.0800605	-0.0383185	0.0669208	0.0573444
31.7647	0	0.222161	0.0877327	0.00676425	0.105553	0.0628148		0.166896	0.0583311	-0.0323772	0.0642831	0.057602
31.9118	0	0.229729	0.084152	0.00593457	0.106605	0.0655721		0.190536	0.0494903	-0.0270818	0.0709816	0.0637333
32.0588	0	0.235549	0.0889517	0.00516793	0.109889	0.0673241		0.197473	0.0448581	-0.0229438	0.0731291	0.0651801
32.2059	0	0.236691	0.078451	0.00546138	0.106868	0.0682458		0.210043	0.0739385	-0.020297	0.0878948	0.0668586
32.3529	0	0.245065	0.0881619	-0.00447262	0.109585	0.0728273		0.192401	0.0898003	-0.0360305	0.0820569	0.066056
32.5	0	0.233	0.106188	-0.0124318	0.108919	0.0708633		0.175872	0.0932953	-0.0494039	0.0732544	0.065799
32.6471	0	0.230681	0.0993102	-0.0129253	0.105689	0.0703953		0.171456	0.0881355	-0.0514278	0.0693879	0.0650202
32.7941	0	0.242814	0.081286	-0.0141333	0.103322	0.0749881		0.183408	0.0783838	-0.0495505	0.0707471	0.0673576
32.9412	0	0.244969	0.0841796	-0.0143291	0.10494	0.0755692		0.200209	0.0851373	-0.0482905	0.0790186	0.0718008
33.0882	0	0.250446	0.115539	-0.0163685	0.116539	0.0770245		0.196488	0.0827995	-0.0519238	0.0757879	0.071796
33.2353	0	0.243979	0.114945	-0.0169159	0.114003	0.0753152		0.187133	0.101526	-0.0622531	0.0754685	0.0731609
33.3824	0	0.213801	0.122104	-0.0215117	0.104798	0.0684778		0.165627	0.0830919	-0.0708203	0.0592994	0.0692853
33.5294	0	0.210737	0.114128	-0.0257581	0.0997024	0.0686502		0.156211	0.0855983	-0.0622628	0.0598487	0.0643686
33.6765	0	0.20409	0.0945488	-0.0273948	0.0904145	0.0668558		0.171468	0.101296	-0.0516679	0.0736985	0.0658751
33.8235	0	0.196946	0.104749	-0.0279729	0.0912409	0.0652789		0.172802	0.106297	-0.0505052	0.076198	0.0661966
33.9706	0	0.200836	0.120405	-0.0268798	0.0981204	0.0666736		0.167333	0.0999601	-0.0521918	0.0717004	0.0649275
34.1176	0	0.176683	0.117111	-0.0316286	0.0873887	0.0619436		0.141339	0.118842	-0.0655668	0.0648711	0.0655415
34.2647	0	0.160887	0.110254	-0.0362565	0.0782949	0.0591113		0.127364	0.147108	-0.0780777	0.0654648	0.0719972
34.4118	0	0.167251	0.10632	-0.0407031	0.0776226	0.0617222		0.132268	0.139774	-0.0739457	0.0660323	0.0700225
34.5588	0	0.186198	0.111441	-0.0409433	0.085565	0.0668341		0.13991	0.136542	-0.0728155	0.067879	0.070354
34.7059	0	0.177605	0.108165	-0.0351532	0.0835389	0.0626401		0.158494	0.129826	-0.0802057	0.0693714	0.075245
34.8529	0	0.185235	0.136598	-0.0283591	0.0978247	0.0646353		0.167636	0.131963	-0.0899443	0.0698851	0.0805755
35	0	0.181892	0.150951	-0.0318896	0.100317	0.0667043		0.164314	0.140322	-0.0990305	0.0685352	0.0840686
35.1471	0	0.156004	0.147424	-0.0369697	0.0888196	0.0629434		0.15772	0.14625	-0.0960952	0.0692916	0.0827597
35.2941	0	0.157033	0.13885	-0.0367964	0.0863623	0.0618026		0.160471	0.134361	-0.0931904	0.0672139	0.0805556
35.4412	0	0.161267	0.139876	-0.034749	0.0887978	0.0620813		0.192111	0.112469	-0.0832234	0.0737855	0.0818017
35.5882	0	0.153519	0.147467	-0.0291958	0.0905966	0.0599216		0.196143	0.113868	-0.0838392	0.0753904	0.083082
35.7353	0	0.142448	0.147806	-0.0311169	0.086379	0.0587683		0.189848	0.130706	-0.0914989	0.0763517	0.0856443
35.8824	0	0.136876	0.152744	-0.0369052	0.0842382	0.0607447		0.17385	0.150341	-0.0965198	0.0758903	0.0864718
36.0294	0	0.127318	0.153107	-0.0463802	0.0780152	0.0626417		0.161857	0.1445	-0.095007	0.0704501	0.0828802
36.1765	0	0.135356	0.140382	-0.0449552	0.0769277	0.0609587		0.183489	0.140686	-0.0879749	0.0787336	0.0842651
36.3235	0	0.158161	0.136838	-0.0396081	0.0851306	0.0626723		0.194493	0.143189	-0.0840228	0.084553	0.0855792
36.4706	0	0.172557	0.146985	-0.0352055	0.094779	0.0654101		0.217511	0.137644	-0.0858123	0.089781	0.0907735
36.6176	0	0.180603	0.132729	-0.0365144	0.0922723	0.0658597		0.201905	0.14754	-0.0912788	0.0860555	0.0900453
36.7647	0	0.185764	0.138294	-0.0391527	0.0949684	0.0684464		0.202414	0.171975	-0.0985267	0.0919543	0.095645
36.9118	0	0.181379	0.140889	-0.0361527	0.0953719	0.066793		0.206025	0.164045	-0.0997199	0.0901164	0.0956887
37.0588	0	0.184237	0.130878	-0.0345953	0.0935065	0.065877		0.220888	0.136605	-0.0920486	0.0884815	0.0934866
37.2059	0	0.208902	0.128661	-0.024951	0.104204	0.0686061		0.217117	0.131054	-0.0851368	0.0876781	0.0899082
37.3529	0	0.224332	0.127492	-0.0251253	0.1089	0.0726097		0.194221	0.129546	-0.0878366	0.0786435	0.0853082
37.5	0	0.215801	0.129382	-0.0253773	0.106602	0.0705478		0.194722	0.139174	-0.0967058	0.0790635	0.0893355
37.6471	0	0.199861	0.128998	-0.0316265	0.0990775	0.0684787		0.192781	0.162294	-0.0982905	0.0855949	0.092363
37.7941	0	0.18679	0.140478	-0.0327274	0.0981802	0.0668052		0.184842	0.153343	-0.0991746	0.0796699	0.0898833
37.9412	0	0.174332	0.130266	-0.033093	0.0905017	0.0630931		0.182876	0.117406	-0.0916286	0.069551	0.0827762
38.0882	0	0.192816	0.123942	-0.0328897	0.0946228	0.0667845		0.20259	0.116601	-0.0797397	0.079817	0.083551
38.2353	0	0.19051	0.141746	-0.0298309	0.100808	0.0668192		0.173657	0.136046	-0.0785975	0.0770352	0.0785701
38.3824	0	0.166414	0.137547	-0.0333863	0.0901916	0.0623483		0.173789	0.137903	-0.0875658	0.0747086	0.0817959
38.5294	0	0.131408	0.157282	-0.0364689	0.0840738	0.0607324		0.166204	0.147286	-0.0917085	0.0739273	0.0829978
38.6765	0	0.130356	0.154556	-0.0351793	0.0832445	0.0596226		0.158888	0.125591	-0.082359	0.0673735	0.0754808
38.8235	0	0.153714	0.151821	-0.0294431	0.0920306	0.0607393		0.15739	0.106135	-0.0759956	0.06251	0.0708158
38.9706	0	0.168254	0.140494	-0.0246596	0.094696	0.0602135		0.169127	0.11516	-0.0650044	0.073094	0.0707848
39.1176	0	0.178775	0.145115	-0.0240471	0.0999477	0.0627543		0.17696	0.130133	-0.0647021	0.0807969	0.0739948
39.2647	0	0.164021	0.142118	-0.0203501	0.0952631	0.0581514		0.154351	0.11725	-0.0681908	0.0678034	0.0688354
39.4118	0	0.163488	0.140785	-0.01869	0.0951944	0.0573181		0.184502	0.125128	-0.0718324	0.079266	0.0774691
39.5588	0	0.179771	0.127524	-0.017912	0.096461	0.059142		0.193512	0.122927	-0.0678513	0.0828627	0.0780632
39.7059	0	0.215374	0.10324	-0.00804708	0.103523	0.0644964		0.207535	0.111967	-0.0504316	0.08969	0.0752969
39.8529	0	0.218569	0.0963191	-0.00744186	0.102482	0.0653164		0.220951	0.0980789	-0.0558851	0.0877149	0.0800835
40	0	0.226624	0.117058	-0.00370263	0.113327	0.0665157		0.218192	0.0945763	-0.0561044	0.0855547	0.079311
40.1471	0	0.24641	0.132409	-0.00246902	0.12545	0.0719293		0.211746	0.09629	-0.0631478	0.0816295	0.0796929
40.2941	0	0.270753	0.130416	0.00361729	0.134929	0.0771484		0.193977	0.102094	-0.058961	0.0790366	0.0739214
40.4412	0	0.283054	0.134468	0.00614476	0.141222	0.0800082		0.197155	0.110059	-0.0488874	0.0861086	0.0720286
40.5882	0	0.302764	0.120363	0.010592	0.144573	0.0852071		0.186325	0.0924799	-0.0350038	0.081267	0.0641376
40.7353	0	0.313968	0.130433	0.0154123	0.153271	0.0869388		0.181794	0.113112	-0.0292318	0.0885581	0.0621428
40.8824	0	0.313375	0.129882	0.0141553	0.152471	0.0871125		0.177823	0.115946	-0.0382617	0.0851691	0.0642484
41.0294	0	0.308756	0.148011	0.0125902	0.156453	0.0856		0.173374	0.133922	-0.0319781	0.0917726	0.0629147
41.1765	0	0.283713	0.1348	0.00851783	0.142344	0.0795315		0.161903	0.153929	-0.0286491	0.0957278	0.062231
41.3235	0	0.243566	0.115493	0.0075308	0.122197	0.0682199		0.147828	0.144989	-0.0205473	0.0907565	0.0556579
41.4706	0	0.21066	0.116641	0.0068096	0.11137	0.0589056		0.151929	0.150409	-0.016882	0.0951522	0.0560188
41.6176	0	0.219038	0.109565	0.00527544	0.111293	0.0617139		0.148092	0.15934	-0.0191512	0.0960936	0.0577138
41.7647	0	0.192087	0.123288	0.0028276	0.106068	0.0553088		0.141304	0.17222	-0.0259872	0.0958456	0.0615667
41.9118	0	0.166783	0.118625	0.00198419	0.0957976	0.0489235		0.159237	0.15181	-0.0316922	0.0931184	0.0624421
42.0588	0	0.15121	0.129086	0.00101393	0.0937702	0.0468158		0.16112	0.160478	-0.0275738	0.098008	0.0627912
42.2059	0	0.136245	0.117609	0.00694385	0.0869325	0.0403545		0.145188	0.162899	-0.0267576	0.0937764	0.0604835
42.3529	0	0.150874	0.109438	0.0140306	0.0914476	0.0405145		0.154495	0.149054	-0.0197705	0.094593	0.0572033
42.5	0	0.170627	0.120674	0.0162408	0.102514	0.0454831		0.189447	0.143387	-0.0186752	0.10472	0.0631139
42.6471	0	0.182039	0.103735	0.0197613	0.101845	0.046855		0.215964	0.132855	-0.0251895	0.107877	0.0707264
42.7941	0	0.175383	0.0933477	0.0190652	0.095932	0.0451436		0.226597	0.120952	-0.0230453	0.108168	0.0723485
42.9412	0	0.192238	0.078406	0.0175045	0.0960495	0.0512069		0.223362	0.110915	-0.0176325	0.105548	0.0696208
43.0882	0	0.186412	0.0774681	0.0193349	0.094405	0.0489689		0.203625	0.0920736	-0.0085356	0.0957209	0.0612726
43.2353	0	0.180545	0.0699035	0.0214158	0.0906215	0.0470903		0.2039	0.100423	-0.00639709	0.0993086	0.0607101
43.3824	0	0.210323	0.071524	0.0208859	0.100911	0.0566255		0.22619	0.103199	-0.00703318	0.107452	0.0673593
43.5294	0	0.210689	0.0770717	0.0162233	0.101328	0.0574325		0.212908	0.0952325	-0.0170794	0.0970203	0.0663976
43.6765	0	0.205229	0.0746701	0.0159385	0.0986126	0.0559395		0.1914	0.100407	-0.0199004	0.0906357	0.0611926
43.8235	0	0.18058	0.0796583	0.012303	0.090847	0.0488984		0.160099	0.092459	-0.0132855	0.0797576	0.0504532
43.9706	0	0.171975	0.103403	0.0154656	0.0969479	0.0452955		0.152497	0.0828923	-0.00892083	0.0754896	0.0467442
44.1176	0	0.181332	0.110698	0.0189632	0.103664	0.0470036		0.162412	0.0753329	-0.00888477	0.0762869	0.0494516
44.2647	0	0.199053	0.101695	0.0203431	0.10703	0.051658		0.163944	0.104404	-0.0128704	0.0851592	0.051941
44.4118	0	0.213503	0.102286	0.0229927	0.112928	0.0552525		0.163287	0.0789506	-0.0128076	0.0764768	0.0508493
44.5588	0	0.211389	0.1052	0.0246514	0.113747	0.0540755		0.148063	0.0823746	-0.00918604	0.0737504	0.0455982
44.7059	0	0.208211	0.101694	0.0305454	0.113483	0.0516252		0.146841	0.0972184	0.000816944	0.0816255	0.0428685
44.8529	0	0.211438	0.0984036	0.0374135	0.115752	0.05098		0.15381	0.10237	0.0128237	0.0896677	0.0411917
45	0	0.237216	0.113366	0.0441071	0.131563	0.0564835		0.154376	0.12017	0.0182936	0.0976134	0.0408707
45.1471	0	0.2327	0.113206	0.0531115	0.133006	0.0527796		0.167827	0.141445	0.0167393	0.108671	0.0465923
45.2941	0	0.228881	0.109006	0.056225	0.131371	0.0510806		0.176003	0.137308	0.00964111	0.107651	0.0502619
45.4412	0	0.203525	0.118863	0.052646	0.125011	0.0436633		0.185368	0.125907	0.010549	0.107274	0.0513185
45.5882	0	0.187377	0.113519	0.0503617	0.117086	0.0395932		0.19083	0.128881	0.014412	0.111374	0.0516743
45.7353	0	0.182327	0.118395	0.0494069	0.11671	0.0383799		0.191997	0.133002	0.0181383	0.114379	0.0510451
45.8824	0	0.176313	0.120816	0.0481216	0.115084	0.0371164		0.196246	0.132442	0.0178769	0.115522	0.0521811
46.0294	0	0.173694	0.121661	0.042653	0.112669	0.0380946		0.192528	0.15314	0.00412594	0.116598	0.057374
46.1765	0	0.171	0.128028	0.0373337	0.112121	0.0393974		0.21205	0.137763	-0.00827594	0.113846	0.0647172
46.3235	0	0.182721	0.130779	0.0247782	0.112759	0.0464758		0.193699	0.135417	-0.0142721	0.104948	0.0619388
46.4706	0	0.163058	0.120051	0.021458	0.101522	0.041913		0.177418	0.14273	-0.00720709	0.104314	0.0566523
46.6176	0	0.182052	0.120635	0.0205982	0.107762	0.0470501		0.164019	0.136193	-0.00213837	0.099358	0.05138
46.7647	0	0.194217	0.125695	0.0216812	0.113864	0.0501567		0.154277	0.154483	-0.00194681	0.102271	0.0521088
46.9118	0	0.178063	0.112831	0.0228563	0.104583	0.0449936		0.156125	0.139206	-0.00420296	0.0970427	0.0508579
47.0588	0	0.173674	0.112568	0.0195843	0.101942	0.0447982		0.146203	0.145646	-0.00656549	0.0950946	0.0508303
47.2059	0	0.170687	0.130503	0.0182119	0.106467	0.045627		0.144268	0.132195	-0.00295066	0.0911705	0.0471895
47.3529	0	0.162629	0.117567	0.0182154	0.0994707	0.0426594		0.167459	0.134232	0.0107098	0.104134	0.0476865
47.5	0	0.156084	0.0947313	0.0251241	0.0919798	0.03783		0.149234	0.151936	0.0186252	0.106598	0.0439935
47.6471	0	0.178512	0.101797	0.0281372	0.102815	0.0434125		0.153444	0.152346	0.0176488	0.107813	0.0450831
47.7941	0	0.184943	0.106065	0.03216	0.107723	0.0441124		0.153813	0.15817	0.0107599	0.107581	0.048427
47.9412	0	0.173871	0.109058	0.0295536	0.104161	0.0417326		0.16946	0.170173	0.00642714	0.115354	0.0544637
48.0882	0	0.18711	0.119211	0.0295729	0.111965	0.045621		0.183635	0.183541	0.00614348	0.12444	0.0591483
48.2353	0	0.198052	0.132524	0.0290058	0.119861	0.0492086		0.189186	0.174647	0.0101502	0.124661	0.0574091
48.3824	0	0.183078	0.115254	0.0318697	0.110067	0.0437272		0.196913	0.166741	0.0136877	0.125781	0.0567192
48.5294	0	0.192615	0.1151	0.0372607	0.114992	0.0448468		0.152541	0.167773	0.0115025	0.110605	0.0497462
48.6765	0	0.210581	0.129717	0.0368928	0.12573	0.050179		0.19058	0.146903	0.0116529	0.116379	0.0538596
48.8235	0	0.208193	0.140251	0.0348871	0.127777	0.0504164		0.207049	0.156688	0.00976372	0.1245	0.0591815
48.9706	0	0.2182	0.140291	0.0309259	0.129805	0.0543148		0.221872	0.161145	0.0131604	0.132059	0.0619801
49.1176	0	0.22877	0.144729	0.0322605	0.135253	0.0569249		0.215922	0.136941	0.0184792	0.123781	0.0573755
49.2647	0	0.237059	0.147476	0.0341693	0.139568	0.0587026		0.202796	0.13732	0.0223678	0.120828	0.0527339
49.4118	0	0.219914	0.1349	0.0353305	0.130048	0.05334		0.20001	0.13906	0.0135979	0.117556	0.0548761
49.5588	0	0.244943	0.13399	0.032978	0.137304	0.0612115		0.209144	0.13307	0.00642745	0.116214	0.0591231
49.7059	0	0.255571	0.142488	0.0267435	0.141601	0.0660584		0.226355	0.133057	-0.00343354	0.11866	0.0667237
49.8529	0	0.252408	0.130697	0.0240948	0.135733	0.0659565		0.221611	0.133288	-0.0108629	0.114679	0.0677514
50	0	0.250149	0.12786	0.023546	0.133852	0.0654832		0.200449	0.135487	-0.00925522	0.108894	0.0619794
50.1471	0	0.237682	0.125957	0.0258941	0.129845	0.0611688		0.183234	0.125748	-0.00869415	0.100096	0.0568701
50.2941	0	0.218186	0.11631	0.025076	0.119857	0.0557743		0.169469	0.119073	-0.0205938	0.089316	0.056848
50.4412	0	0.213243	0.111543	0.0169868	0.113924	0.0566668		0.162326	0.0939648	-0.0349868	0.0737679	0.0578475
50.5882	0	0.231177	0.114702	0.0120259	0.119302	0.0633052		0.174082	0.0957232	-0.0380505	0.0772516	0.06193
50.7353	0	0.241785	0.120977	0.0127205	0.125161	0.0661584		0.161562	0.0962388	-0.038398	0.0731341	0.058868
50.8824	0	0.219569	0.114393	0.0151025	0.116355	0.0590327		0.154089	0.0868818	-0.0360324	0.0683129	0.0556632
51.0294	0	0.200449	0.132385	0.016499	0.116444	0.0536966		0.158281	0.0891751	-0.0344243	0.0710104	0.0563656
51.1765	0	0.194529	0.133059	0.0140884	0.113892	0.052963		0.171177	0.0835957	-0.0376545	0.0723729	0.0605452
51.3235	0	0.19053	0.134619	0.0135466	0.112899	0.0522323		0.168056	0.10305	-0.0422546	0.0762838	0.062169
51.4706	0	0.180882	0.124319	0.0109771	0.105393	0.0499518		0.157524	0.0959821	-0.0346113	0.072965	0.0566461
51.6176	0	0.151574	0.108191	0.0126379	0.0908011	0.0410392		0.144481	0.0945876	-0.0258967	0.0710572	0.0505713
51.7647	0	0.1231	0.0900227	0.0150321	0.0760516	0.031969		0.122826	0.0741922	-0.018688	0.0594434	0.0415118
51.9118	0	0.0806226	0.0704682	0.012597	0.0545626	0.0211866		0.0963375	0.0656696	-0.0136467	0.0494535	0.0327686
52.0588	0	0.0641105	0.0564011	0.00833624	0.0429493	0.017449		0.0776311	0.0613564	-0.00949308	0.0431648	0.0267448
52.2059	0	0.0475508	0.0347849	0.0040179	0.0287846	0.01292		0.0442987	0.0464515	-0.00733288	0.0278058	0.0175803
52.3529	0	0.0244794	0.016901	0.0029484	0.0147763	0.0063056		0.0166512	0.0294905	-0.00395679	0.0140616	0.00974182
52.5		0	0	0				0	0	0
52.6471		0	0	0				0	0	0
52.7941		0	0	0				0	0	0
52.9412		0	0	0				0	0	0
53.0882		0	0	0				0	0	0
53.2353		0	0	0				0	0	0
53.3824		0	0	0				0	0	0
