# Supplementary material for: Multiphoton imaging of neural structure and activity in Drosophila through the intact cuticle
Source: eLife. 2022 Jan 24;11:e69094. doi: 10.7554/eLife.69094 (PMC8846588; doi:10.7554/eLife.69094)
Supplement: Figure 6—source data 1. [file elife-69094-fig6-data1.xlsx]

## Sheet: fly1
Time	gamma-L5	gamma-L4	gamma-L3	gamma-L2	alpha-L	gamma-R5	gamma-R4	gamma-R3	gamma-R2	alpha-R	stimulus			Time	gamma-5	gamma-4	gamma-3	gamma-2	alpha	stimulus
0											0			0	-0.0375164	-0.0243155	-0.0311332	0.00718952	-0.0101588	0
0.2											0			0.2	-0.0163679	-0.0418899	-0.0312246	-0.00889007	-0.0101006	0
0.4											0			0.4	-0.0301839	-0.00935782	-0.0152421	-0.020899	0.00202042	0
0.6											0			0.6	-0.0288012	0.00447528	-0.0399965	0.000698189	0.0103933	0
0.8											0			0.8	-0.00423497	-0.00889712	-0.00287562	-0.00918867	-0.0053246	0
1											0			1	0.024278	0.00723142	0.0446781	-0.00636274	-0.0019295	0
1.2											0			1.2	0.0354952	0.0424792	0.0555802	0.0144928	-0.00489754	0
1.4											0			1.4	0.0560818	0.0420911	0.0498832	0.0367778	-0.012396	0
1.6											0			1.6	0.0531547	0.0262222	0.0170911	0.0342357	-0.00946524	0
1.8											0			1.8	0.0293005	0.0259582	0.0100239	0.00108011	-0.0112066	0
2											0			2	0.00720193	0.0140306	-0.0116321	-0.00492425	-0.00291335	0
2.2	0	0	0	0	0	0	0	0	0	0	0			2.2	-0.0103012	-0.0118939	0.010677	-0.00473893	0.010556	0
2.4	0	0	0	0	0	0	0	0	0	0	0			2.4	-0.00768478	0.00333039	0.0115186	0.0122001	0.0108924	0
2.6	0	0	0	0	0	0	0	0	0	0	0			2.6	-0.00998548	0.0102032	-0.0300064	-0.000772299	0.00351565	0
2.8	0	0	0	0	0	0	0	0	0	0	0			2.8	-0.000246056	-0.0242637	-0.0225829	-0.024596	-0.0173295	0
3	0	0	0	0	0	0	0	0	0	0	0			3	0.000974926	0.00449829	0.0101831	-0.0340504	-0.0200534	0
3.2	0	0	0	0	0	0	0	0	0	0	0			3.2	-0.0131258	0.00852739	-0.0146244	0.014767	0.00443837	0
3.4	0	0	0	0	0	0	0	0	0	0	0			3.4	-0.0236429	-0.0119735	-0.00490325	0.0045056	0.00151178	0
3.6	0	0	0	0	0	0	0	0	0	0	0			3.6	-0.00888096	-0.0158401	-0.0162502	-0.00697532	-0.00402652	0
3.8	0	0	0	0	0	0	0	0	0	0	0			3.8	0.00582515	-0.0183977	-0.0093332	9.20641e-06	-0.0160952	0
4	0	0	0	0	0	0	0	0	0	0	0			4	0.00834148	-0.00615486	0.0139128	0.0110233	-0.00431827	0
4.2	0	0	0	0	0	0	0	0	0	0	0			4.2	0.0167098	0.0160821	-0.00132085	-0.00474578	-0.00386781	0
4.4	0	0	0	0	0	0	0	0	0	0	0			4.4	0.0252142	0.00899101	-0.00835868	0.0148307	-0.00653408	0
4.6	0	0	0	0	0	0	0	0	0	0	0			4.6	0.00981756	0.00733316	0.013235	0.0333702	-0.000833598	0
4.8	0	0	0	0	0	0	0	0	0	0	0			4.8	0.00347752	0.00684215	0.0244152	-0.00482065	0.0123409	0
5	0	0	0	0	0	0	0	0	0	0	0			5	0.0139543	0.0205774	0.0364128	-0.0220301	0.0163048	0
5.2	0	0	0	0	0	0	0	0	0	0	0			5.2	0.00735771	0.022574	0.0135985	-0.00445812	-0.00317938	0
5.4	0	0	0	0	0	0	0	0	0	0	0			5.4	-0.00707915	0.00987264	0.00396451	0.0182237	0.00231094	0
5.6	0	0	0	0	0	0	0	0	0	0	0			5.6	0.00174067	0.00937654	-0.018496	0.018568	-0.000958666	0
5.8	0	0	0	0	0	0	0	0	0	0	0			5.8	-0.008067	-0.0185493	-0.00742807	-0.0248946	0.00442539	0
6	0	0	0	0	0	0	0	0	0	0	0			6	-0.00879441	-0.00645859	0.02499	-0.000815426	0.0052972	0
6.2	0	0	0	0	0	0	0	0	0	0	0			6.2	-0.0246924	0.00936609	0.00278221	0.000892135	0.00465937	0
6.4	0	0	0	0	0	0	0	0	0	0	0			6.4	-0.0380999	-0.0210669	-0.0240369	-0.0229796	0.0253073	0
6.6	0	0	0	0	0	0	0	0	0	0	0			6.6	-0.0206351	-0.0505483	-0.0313102	-0.019678	0.0363009	0
6.8	0	0	0	0	0	0	0	0	0	0	0			6.8	-0.00668387	-0.0271186	-0.0390348	-0.00737392	0.0265742	0
7	0	0	0	0	0	0	0	0	0	0	0			7	-0.0218576	-0.0243476	-0.0107186	0.0165826	0.0400965	0
7.2	0	0	0	0	0	0	0	0	0	0	0			7.2	-0.0202784	-0.015669	0.0064773	0.0073235	0.0483361	0
7.4	0	0	0	0	0	0	0	0	0	0	0			7.4	-0.00194299	-0.00851754	0.0106351	-0.0155225	0.0536096	0
7.6	0	0	0	0	0	0	0	0	0	0	0			7.6	0.0135963	0.00951997	-0.00505235	-0.0193668	0.0503403	0
7.8	0	0	0	0	0	0	0	0	0	0	0			7.8	-0.00204093	-0.000416549	0.00861403	-0.0140363	0.0421834	0
8	0	0	0	0	0	0	0	0	0	0	0			8	-0.00926491	-0.0224654	0.0243361	0.0022937	0.0443222	0
8.2	0	0	0	0	0	0	0	0	0	0	0			8.2	0.0128376	-0.012968	0.00314127	-0.0108433	0.0525233	0
8.4	0	0	0	0	0	0	0	0	0	0	0			8.4	0.000320238	-0.00235084	-0.00460296	-0.0165294	0.0445399	0
8.6	0.0109196	0.0292488	0.042287	0.0182047	0.0336278	-0.0340867	0.0119029	0.0105676	-0.0364694	0.00020032	0			8.6	-0.0120317	-0.0116857	-0.0116678	-0.00272293	0.042399	0
8.8	-0.0332103	0.020014	0.029347	-0.0426844	-0.00780202	-0.031576	-0.0317907	0.029434	-0.0237742	0.0271148	0			8.8	-0.0085319	-0.0280646	0.0192049	0.00964661	0.0275505	0
9	-0.00390571	0.00954962	-0.0354648	-0.0411525	-0.023669	-0.0370535	-0.0899567	0.00392594	0.0608933	-0.000889396	0			9	-0.0123539	-0.0170012	0.015565	-0.00328729	0.0238772	0
9.2	-0.0244291	-0.0431009	-0.0631211	-0.0450662	-0.0119041	-0.0614287	-0.0279801	-0.00319004	0.0570603	-0.026077	0			9.2	-0.01019	-0.0275454	-0.0228379	-0.0320485	0.0346752	0
9.4	-0.0125137	-0.033616	0.0582688	0.0221782	-0.00577854	-0.035738	0.00626081	-0.00915046	0.00132359	0.0332726	0			9.4	-0.0121638	-0.036014	-0.0424334	-0.00835471	0.0180905	0
9.6	-0.0510164	-0.00749039	0.00892616	-0.0480331	0.0154278	-0.00233716	-0.01096	-0.0191328	-0.00618778	-0.0092499	0			9.6	-0.0388111	-0.0186417	-0.0496555	-0.000928634	0.0247093	0
9.8	-0.0233641	-0.0226917	-0.0450418	-0.00939987	0.0216627	0.0181663	0.00537399	-0.0235507	0.0245692	-0.0521712	0			9.8	-0.0427561	-0.0540421	-0.0320815	-0.00856791	0.0241313	0
10	0.00482964	-0.010918	-0.000653662	0.0362027	0.0133376	0.024875	0.0154342	-0.0195244	-0.0359085	-0.00797487	0			10	-0.014235	-0.0549729	-0.0126909	-0.0301187	0.0243062	1
10.2	0.0200089	-0.00871164	0.024398	-0.0188092	-0.00857229	0.0344588	0.0122223	-0.0189186	-0.0730956	-0.000235255	0			10.2	0.0132777	0.010039	0.0328831	0.00820809	0.0192338	1
10.4	0.0229796	-0.0391294	-0.0139364	-0.0534012	-0.0308935	0.045955	0.0219818	-0.00774905	0.00452802	-0.0404161	0			10.4	0.0233992	0.052334	0.0442562	0.0292027	0.0254794	1
10.6	-0.0388116	-0.000229589	-0.0201965	-0.023331	-0.011923	0.0272161	-0.00720616	0.0382975	0.0211941	0.029963	0			10.6	0.0261644	0.0568772	0.0415588	0.0406523	0.0448367	1
10.8	0.0518023	-0.0028601	-0.014877	0.0445895	0.0157105	-0.00794374	-0.0324484	0.0596205	0.0353005	0.0540497	0			10.8	0.0531041	0.0677356	0.0875909	0.057085	0.0528726	1
11	0.00884784	-0.00542881	-0.0269321	0.0352014	-0.0134876	0.0017882	0.0592431	0.017891	-0.06775	0.0300193	0			11	0.0464598	0.0912394	0.083291	0.051166	0.0390025	1
11.2	-0.00522942	-0.0317707	-0.0418988	0.0451781	-0.0240162	0.0477489	0.0677384	0.00224883	-0.00339823	0.0186671	0			11.2	0.0222355	0.062811	0.0724194	0.0443162	0.0277578	1
11.4	0.0240402	0.0125496	-0.0695862	0.0372088	-0.0143067	0.025617	0.00266368	-0.0259122	0.0644962	-0.00720436	0			11.4	0.00848981	0.0629055	0.046796	0.0432904	0.0469079	1
11.6	0.0057784	0.0628237	-0.0659145	0.026293	-0.00632938	-0.0282427	-0.00984969	-0.0326165	-0.010808	-0.0139885	0			11.6	0.0186577	0.0588333	0.0485498	0.0543283	0.0579058	1
11.8	-0.00550513	0.0110732	0.0113337	0.0718554	0.0143895	-0.0062898	0.0171791	0.0460723	-0.015053	0.0430565	0			11.8	0.0039019	0.0340275	0.035488	0.045688	0.0402505	1
12	-0.00101246	0.0393693	0.047456	0.0277514	0.0240774	0.00897399	0.0396761	0.041312	0.0247356	0.0516515	0			12	-0.00301768	0.0486277	0.0044013	0.0153134	0.023428	1
12.2	0.0301937	0.0314171	0.00617722	-0.00746076	0.043068	-0.00195679	0.0116618	-0.0190355	0.0122792	0.0267485	0			12.2	-0.0187166	0.006059	-0.00452406	0.0423565	0.036975	1
12.4	0.0449332	0.00716257	0.200278	0.00758212	0.0128851	0.0221965	0.0307143	0.000913165	0.000331703	0.0142972	0			12.4	-0.0372969	-0.00353384	-0.00995814	-0.00033112	0.0278501	1
12.6	0.0329384	0.0441636	0.120627	0.0248303	-0.00377024	-0.0144035	0.00557388	-0.00595516	0.00347066	0.0253582	0			12.6	-0.0441858	0.0272096	0.0104112	-0.00341471	0.00162707	1
12.8	0.0140944	0.0047062	-0.0166155	-0.00625402	-0.0125642	-0.0375224	-0.0429837	0.0183797	0.0179292	0.0212119	0			12.8	-0.0146328	0.0050755	0.0137234	0.0379557	0.00508773	1
13	-0.00328786	-0.080629	0.0477136	-0.0592448	-0.0297505	0.00296554	-0.0222377	0.0549245	0.0325985	0.0211545	0			13	-0.0223543	-0.00184249	0.0227655	0.0381412	0.0189527	0
13.2	-0.0201843	-0.00217272	-0.0864849	-0.0563712	-0.0140148	-0.0199512	-0.016701	-0.0502816	0.0358696	0.069513	0			13.2	-0.0297327	0.0237248	0.014678	0.027645	0.0198671	0
13.4	-0.0216331	0.00558533	-0.0329743	-0.00237391	-0.0196413	-0.0251411	-0.0908381	-0.0438722	0.0528563	0.0793396	0			13.4	-0.0201231	0.00453509	0.021217	0.0155814	0.00731487	0
13.6	-0.00859122	-0.0858491	0.00949999	-0.0200563	0.0295244	-0.00708528	-0.0602622	-0.0264513	0.0220669	0.0506933	0			13.6	-0.0263974	-0.00842746	-0.0179347	-0.00189868	0.00273083	0
13.8	-0.00466793	-0.0347686	0.0314584	-0.0431853	0.0167495	-0.00118841	0.014066	0.0120296	-0.0151298	0.00493777	0			13.8	-0.0339196	0.00212392	-0.0148407	0.0105492	-0.0118986	0
14	-0.0528857	0.0314659	0.0200051	0.0341057	-0.0155015	-0.0356625	0.0161573	-0.0158567	0.0114144	-0.0194131	0			14	-0.0391737	-0.0117934	-0.00095805	-0.00856755	-0.00472275	0
14.2	-0.0429252	0.0719402	-0.0108245	0.017122	-0.00899212	-0.0357169	-0.00051524	0.0240962	0.00100523	-0.0152407	0			14.2	-0.0227024	-0.00162485	-0.0114806	0.0056899	-0.000807677	0
14.4	0.0564307	0.098515	-0.0341126	-0.101894	-0.000883338	0.0496761	0.0331206	0.130832	-0.0465018	-0.0297072	0			14.4	0.00264947	0.0270258	0.0179587	0.0150788	-0.00731142	0
14.6	0.0412884	-0.0251619	-0.0644144	0.011259	0.00870858	0.107482	0.0474918	0.00324014	0.0304599	-0.0690304	0			14.6	0.0202302	0.0319034	0.0285619	-0.00376789	-0.0039979	0
14.8	-0.0303301	0.0396288	-0.0112912	0.0206341	0.00780326	0.0664105	0.0376346	0.025268	-0.0150113	-0.0366738	0			14.8	0.0400615	0.030724	0.0395993	0.0424786	0.00228682	0
15	-0.0728006	-0.00974463	-0.119068	-0.0209086	-0.00405117	-0.00912302	0.00378568	-0.0171287	-0.0576678	-0.00463054	0			15	0.0212858	0.0151266	0.0444132	0.0287506	0.0147272	0
15.2	-0.0244639	-0.0462764	-0.10127	0.0291732	-0.00397984	-0.0368912	0.0034791	-0.0516738	-0.00715815	0.0173606	0			15.2	0.00163158	0.035057	0.0132711	0.00248447	0.0151012	0
15.4	0.0128483	-0.0253793	0.0796305	0.0116985	-0.0219117	-0.0355287	-0.000331723	-0.0439323	-0.0192606	-0.00370772	0			15.4	0.013029	0.0217814	0.00894031	-0.0177503	-0.00123593	0
15.6	0.0202463	-0.0453583	0.054881	-0.0401239	-0.0014831	-0.0310963	-0.0340189	-0.0597206	-0.0658685	-0.0244891	0			15.6	0.0226863	0.0171147	0.0219986	-0.00705583	-0.00833257	0
15.8	0.0552871	-0.0357373	-0.122496	0.0201164	0.0676769	-0.0259856	-0.0362828	-0.0434189	0.00641369	0.0137122	0			15.8	0.0176454	0.0439503	0.0181465	0.018725	0.00662733	0
16	0.00591542	0.02836	0.0207956	-0.0477112	-0.000617631	-0.0463995	-0.00428435	0.0301131	0.0347647	0.0033702	0			16	-0.00940773	0.0173655	0.0171444	0.0214717	-0.00401753	0
16.2	-0.0293336	-0.0448741	0.0209914	-0.0194045	-0.0289452	-0.00154499	0.0157707	0.00424558	0.0527785	0.00394602	0			16.2	-0.00581736	0.0154158	0.0124113	0.0225863	-0.01235	0
16.4	0.00805161	0.0271673	0.0172382	0.0138317	-0.0116381	0.0506782	0.0349225	0.0222349	0.0458969	0.0508076	0			16.4	0.0266776	0.0283149	0.0441978	0.0265433	0.000654354	0
16.6	0.005182	0.0105626	0.0668699	0.0238869	-0.0236534	-0.00344749	0.0149246	0.0300452	0.0181819	0.0308932	0			16.6	0.00122877	0.00917099	0.0158876	0.00945251	-0.0136604	0
16.8	0.0184565	-0.0709988	0.0708061	0.0163435	-0.0313698	-0.0301392	-0.0187618	0.0178551	-0.0449798	-0.0113592	0			16.8	0.0118078	0.00922848	0.0234538	0.0176081	-0.002321	0
17	0.0666141	0.00504133	0.0289455	0.00503726	0.009897	0.0255647	-0.0188988	0.0156355	-0.0593729	-0.00440797	0			17	0.0202603	0.012037	0.0260414	-0.0131377	0.0176016	0
17.2	0.0113725	0.0450987	0.0158721	0.0162069	0.0370574	-0.00404042	0.00892675	-0.0235684	0.0232639	-0.0296501	0			17.2	0.00289228	-0.00812333	0.0103325	-0.0330761	-0.00926356	0
17.4	-0.00451083	-0.0146255	0.0123678	-0.0218029	0.0181029	-0.00679165	0.0560399	0.00632498	-0.0358123	-0.042676	0			17.4	-0.00437384	-0.011321	-0.01033	0.0107197	0.00098932	0
17.6	-0.0378383	0.0330424	-0.0752269	0.00897037	0.0199162	-0.0121357	-0.0444654	0.0178712	0.0145407	-0.0241951	0			17.6	-0.00356408	-0.00154222	-0.0409844	0.0082025	0.0112239	0
17.8	-0.000132137	0.0156418	-0.0370314	0.00356955	-0.000648318	0.0204978	-0.0238593	0.0061888	0.0018094	0.00702441	0			17.8	0.018739	0.00459296	-0.0363338	-0.00246884	-0.00911343	0
18	0.0160089	-0.00109876	0.0589782	-0.00405307	-0.0196628	0.00879518	0.0567714	-0.0066371	-0.00780657	-0.00306483	0			18	0.00944926	-0.00868629	0.015341	0.00567253	-0.0106415	0
18.2	-0.0477483	0.0407707	0.0509291	-0.00564423	-0.00373118	-0.0203867	0.00620712	0.00695099	0.034674	-0.0257867	0			18.2	-0.0030991	-0.0202913	0.0154766	-0.0129381	-0.00851911	0
18.4	-0.0627298	0.00266421	-0.0274013	-0.0418802	0.0113935	0.0209185	-0.0576275	0.0152479	0.00941333	-0.0147834	0			18.4	-0.00263861	-0.0177906	-0.0374433	-0.0278911	-0.00850091	0
18.6	-0.0160681	-0.0815482	-0.0670188	-0.0185479	0.00203136	0.0218761	0.00424009	-0.0314276	-0.00943315	-0.0141641	0			18.6	-0.00822157	-0.000814652	-0.0193457	0.00381628	0.000279583	0
18.8	-0.0630342	-0.0653544	0.0212521	0.00193161	-0.0137088	-0.0174053	-0.00111955	0.0093642	0.00562225	-0.00139875	0			18.8	-0.028798	0.0025241	0.00440904	0.00645197	0.0060208	0
19	-0.054854	0.00646425	0.0358772	0.0232342	-0.0225257	-0.041308	-0.0415866	-0.0135539	0.042191	-0.0165308	0			19	-0.00487954	-0.00203917	-0.00367223	0.0119149	-0.00255497	0
19.2	0.0114629	0.0330989	-0.0235559	-0.0140302	-0.0107541	-0.00770522	-0.0449894	-0.0328365	-0.0199043	-0.0177756	0			19.2	-0.00778012	0.00124604	0.0184034	0.00692013	-0.00800954	0
19.4	0.0208263	-0.0117483	-0.0213464	-0.014554	0.000276376	0.00420563	-0.00296379	-0.0206036	-0.0539956	-0.00200958	0			19.4	-0.0104097	0.00448965	0.00926326	-0.0117268	-0.0149216	0
19.6	0.0088865	-0.0378743	-0.022065	0.0353188	0.000111297	0.00483405	0.0349368	-0.0366803	0.00592714	-0.011611	0			19.6	-0.00117353	0.0130267	0.0079452	-0.0014096	-0.00936481	0
19.8	0.0341507	-0.00474393	-0.0695084	0.0210995	0.000696222	0.0407682	0.019403	-0.0334745	-0.0050468	-0.0286346	0			19.8	-0.00815291	0.00385959	-0.00452626	0.00652967	0.010694	0
20	-0.0346189	-0.0203101	0.0322409	0.0198671	-0.0109295	-0.0301707	-0.0309705	0.0310816	-0.0329802	-0.00614492	0			20	-0.00462499	-0.000316344	-0.0311094	-0.0178762	0.0295146	0
20.2	-0.0448087	0.00543299	-0.0810295	-0.04181	-0.00723702	-0.0387991	-0.0515064	-0.013152	0.0268874	-0.00648527	0
20.4	0.0296869	0.0147977	-0.054979	0.0112562	-0.00835607	-0.024842	0.00248854	-0.0351264	-0.00512277	-0.0439824	0
20.6	0.0621467	0.0618175	0.0363762	0.0418617	0.0084367	0.00427292	0.0319747	0.00842205	-0.0205001	-0.0434142	0
20.8	0.0334268	0.0397465	-0.00601404	-0.00379909	0.0337976	0.00786914	0.0146245	0.00223246	0.0121903	-0.0152756	0
21	0.00419259	-0.0418988	-0.0308403	-0.0236142	0.0269474	-0.0258374	0.00687145	-0.0493663	-0.000200234	-0.0327803	0
21.2	-0.0198552	0.031224	0.0581551	-0.0483843	0.0138835	-0.0136259	-0.0145253	-0.0157378	-0.0116664	-0.05233	0
21.4	0.00252453	-0.00797191	0.0142624	-0.0397072	0.0365265	-0.0214042	-0.0543211	0.0209442	-0.0507435	0.00483662	0
21.6	0.0278353	0.0014199	-0.0521285	-0.00610613	-0.001583	-0.0498702	-0.0444611	-0.0322528	-0.0340437	-0.0348965	0
21.8	0.0213928	0.0663681	0.0782594	0.00734769	-0.017381	0.00346023	-0.00359458	-0.0182402	-0.0125692	-0.027834	0
22	-0.0186087	0.00714586	0.104868	-0.00379695	0.00850658	0.0540542	-0.00736652	0.0571054	-0.0241671	0.0101013	0
22.2	-0.0359491	-0.0540731	0.00378612	-0.0267182	0.00236695	0.0272983	-0.0359012	0.0619186	-0.0167891	-0.00196411	0
22.4	-0.00230276	-0.00064096	0.0226027	-0.00723628	-0.0316898	-0.00715639	-0.0113678	-0.00356205	0.0113094	0.00549425	0
22.6	0.0234633	-0.0689384	-0.0412965	0.0789287	-0.0162307	-0.0114477	0.0425735	-0.047047	-0.008606	0.0332501	0
22.8	0.0527935	0.0253888	0.0037597	0.0328309	0.014714	0.0330794	0.0608577	-0.0547961	0.0076613	-0.0165684	0
23	0.0250136	-0.00732333	0.0719402	0.0805552	-0.0026167	0.0567476	0.0222825	0.0390202	-0.00166587	0.0223559	0
23.2	0.0345092	0.00396223	0.0592294	0.0757453	-0.0193774	0.0411487	0.035628	0.0524626	0.0169123	0.00527116	0
23.4	0.032906	0.0703251	0.00728965	0.0222004	0.0056898	0.00317057	0.0274555	0.0185833	0.00802004	0.0164383	0
23.6	-0.00303492	0.0199068	-0.0346017	0.0055152	0.0048367	0.0153913	-0.000375833	0.0633066	-0.00722831	0.0673635	0
23.8	0.0302877	-0.038914	-0.0516188	-0.0295486	-0.030905	0.0692083	0.0510408	0.0739249	0.0627163	-0.0359656	0
24	0.029544	-0.0124777	0.0136165	0.0443573	0.0255916	-9.02251e-05	-0.012336	0.00161478	0.0199187	-0.0207857	0
24.2	0.0266694	-0.00181151	0.0349724	0.0383292	-0.00587368	0.0218267	0.0242018	0.0333791	0.0212383	0.0340252	0
24.4	0.0159659	0.0768768	-0.00233224	-0.0244038	0.0110911	-0.00101873	0.0332557	0.0297555	0.0856469	0.0312676	0
24.6	-0.0180096	0.0407814	0.00413812	-0.0515318	0.0178831	-0.0100754	0.0055716	-0.00777979	0.0194564	0.0132603	0
24.8	-0.0352261	-0.0260409	0.0353442	-0.0287529	-0.0159352	0.0275471	0.0293695	-0.0279862	-0.000453708	0.0292565	0
25	-0.0253074	0.0347574	0.00227637	-0.0136186	-0.00478816	0.00142003	0.0408382	-0.0330713	0.101463	0.0551597	0
25.2	-0.0502274	0.0106709	-0.0418745	-0.0375292	0.0018687	-0.0465892	-0.0327487	0.00232764	-0.0153632	0.0618568	0
25.4	-0.0770817	0.0158492	-0.0144262	-0.0306297	-0.0163608	-0.0300943	-0.0397981	0.00341563	-0.0293136	0.0542969	0
25.6	-0.0193244	0.0047139	0.00846774	-0.0112702	-0.00635072	-0.0482281	-0.0330135	-0.0335712	-0.0372723	0.00713989	0
25.8	0.0323482	-0.0272338	-0.0114109	-0.00771917	-0.00883645	0.000756788	0.0151965	-0.0327382	0.0130435	-0.00869763	0
26	0.0164482	-0.0241297	-0.00076903	0.0127092	-0.0122576	0.0187997	0.0201363	-0.0260656	0.0436741	0.0192864	0
26.2	-0.00597738	-0.0284472	-0.000720985	0.0206815	-0.00547809	-0.0334263	-0.0305779	-0.00477113	-0.0153137	0.0171051	0
26.4	0.00608047	-0.0585269	-0.057592	-0.0142046	-0.011674	-0.0266724	-0.0409451	0.0540522	-0.0515047	-0.0341562	0
26.6	0.00288705	-0.00324567	-0.0344344	0.000131763	0.00210572	-0.0169148	-0.0403817	0.025565	-0.0198586	-0.047471	0
26.8	0.0077222	-0.0239972	-0.0681794	-0.00586904	0.0124261	0.031489	0.0396763	-0.00374439	0.0271899	0.00106711	0
27	0.0263371	-0.00807473	-0.00358024	-0.0375349	-0.00913147	0.0278164	0.0406481	-0.00230332	-0.0195582	0.0152058	0
27.2	0.0118074	0.000654756	0.0229641	-0.0602293	-0.0114376	0.0193505	0.0558736	0.013268	-0.00560113	-0.0352306	0
27.4	-0.00183696	-0.0217108	-0.0467607	-0.0371427	0.00201144	-0.00684163	0.0235757	0.0308626	0.0141723	-0.0328916	0
27.6	0.0152691	0.0041482	-0.0471788	-0.0053104	0.00570957	-0.0415152	-0.0468376	0.0186605	-0.0367138	0.0157113	0
27.8	0.00707002	0.0539748	0.0348591	-0.0101559	0.018213	0.0129084	0.0275027	-0.0188732	-0.0176733	-0.0106303	0
28	-0.0158231	0.0260023	0.0257939	0.025963	0.0158525	0.0411274	-0.0015471	0.0136522	-0.018123	0.00738115	0
28.2	-0.0242968	0.0104835	0.0222629	0.0281075	0.0233546	-0.0115155	-0.00872422	0.0137364	0.00711038	0.00458831	0
28.4	-0.0152693	-0.0354512	0.0368634	-0.00769719	0.0140149	-0.00940283	-0.0163835	-0.000792886	0.054914	-0.00861836	0
28.6	-0.00395546	-0.0367145	0.0396636	-0.0430513	0.0201488	0.0266044	-0.0378568	0.0129629	0.00549516	-0.0179207	0
28.8	-0.0115315	0.00648869	0.00966292	-0.00858431	0.0250435	0.0355562	-0.00935579	0.0171778	-0.000862268	-0.0299529	0
29	-0.037955	0.00500151	-0.00480795	0.064211	-0.0072847	0.0328073	0.00642903	-0.0132238	0.0861889	-0.00939242	0
29.2	-0.0402654	0.00377364	0.0510331	0.0488731	-0.0196017	0.00710313	-0.0812392	-0.0221983	-0.024529	0.0428412	0
29.4	0.00640004	0.00595438	0.0391507	0.0491876	-0.0192032	-0.0346162	-0.0284246	-0.0161518	-0.0618255	-0.00882226	0
29.6	-0.0103323	-0.00502506	0.0138559	0.0553142	-0.0047465	-0.0488368	-0.0190342	-0.0361727	-0.048901	0.0194712	0
29.8	-0.0282752	-0.0243322	-0.113432	-0.00420432	0.0109168	-0.0585866	0.0155828	-0.0660856	-0.0664302	0.0550467	0
30	-0.00914148	-0.0081092	-0.077296	0.00816943	-0.00273613	-0.0342827	0.0307365	-0.064558	-0.0450547	-0.000954491	0
30.2	0.0285447	0.00302508	0.0269472	0.0532569	0.00211826	-0.0183333	-0.0223695	-0.0350402	-0.0120377	-0.0381268	0
30.4	0.0574346	-0.0192867	-0.0923362	-0.0398401	0.0429136	-0.0545531	-0.0275652	-0.0152371	-0.0201553	-0.00559156	0
30.6	0.00911599	0.0295757	0.0399703	-0.0462471	-0.00622056	0.00419258	0.00753329	-0.0173018	0.0776396	-0.058396	0
30.8	-0.0452037	-0.000773588	0.0704823	0.0224985	-0.0346803	0.0594425	0.0876968	-0.0244518	0.0544914	-0.035172	0
31	0.00234014	0.0127875	0.0777509	-0.0343999	-0.0317286	0.0976695	0.0755362	0.0733547	-0.00555705	-0.0480185	0
31.2	0.0240645	0.0075901	0.0851226	-0.0757107	-0.0118423	0.0719331	0.0550616	0.100023	0.0522112	-0.0393836	0
31.4	-0.0250423	-0.00484351	-0.0284612	-0.0141677	-0.0101332	0.0110666	0.0115807	0.0395451	0.0801398	0.0105337	0
31.6	-0.0169225	0.0492408	-0.0847337	0.00258681	-0.0195047	0.00231384	-0.0661954	0.0358439	0.006448	0.0297658	0
31.8	0.0521389	0.0565655	0.0873944	-0.0250935	0.0191538	0.0205923	-0.0120809	0.0486344	0.0193777	0.0236267	0
32	0.0397804	-0.02555	0.000208647	0.0723682	0.049331	-0.0156284	0.0628249	0.0362055	-0.00327498	-0.0235519	0
32.2	0.0619906	-0.0629947	-0.0553053	-0.00728583	-0.00604537	-0.0214881	0.0138863	0.00504892	-0.0606315	-0.0172763	0
32.4	-0.00881921	-0.0342493	-0.0229155	-0.0303402	0.00916315	-0.0390331	-0.0342008	-0.0712023	-0.0660458	-0.0123905	0
32.6	-0.0602228	-0.0413678	-0.0321538	-0.00423435	0.0255176	-0.0608128	-0.0278963	-0.059871	0.00380329	-0.0152732	0
32.8	-0.00491277	-0.0473432	-0.054643	-0.0195945	-0.00325208	-0.0462327	-0.0213415	-0.00347311	0.0398579	0.0107275	0
33	0.0245986	0.0209283	-0.0306715	-0.00512571	-0.000883045	-0.00987784	-0.0237035	-0.0246043	-0.0175846	0.0279505	0
33.2	0.00393464	0.0543513	-0.0114795	0.0140844	-0.0185039	0.0205209	0.00502398	0.00491936	-0.0435725	-0.00670011	0
33.4	-0.0212807	0.0684023	0.122121	0.08962	0.00655892	0.0377258	0.0588783	0.0106559	-0.00962986	-0.0160058	0
33.6	-0.00788851	0.0359653	0.12296	0.0581019	-0.00115432	0.0739302	0.0251887	0.0823886	-0.0259978	-0.0143117	0
33.8	0.0289757	0.0251778	0.0436316	0.0154428	-0.00294286	0.0384631	-0.0224561	0.0117359	-0.0560015	0.000538898	0
34	-0.00945169	0.051125	-0.0316225	-0.00190269	-0.00100979	-0.0211737	-0.0137856	-0.0676425	-0.0159592	0.020754	0
34.2	-0.0413956	0.0197074	-0.0577756	0.010862	-0.023219	-0.00946973	-0.00736838	-0.00405127	0.0395608	0.0270814	0
34.4	0.0404223	-0.0734037	0.023406	0.0386875	-0.0266905	0.0233866	-0.0323116	0.00827508	0.0333437	0.0310969	0
34.6	0.00265204	-0.0736154	0.0716063	-0.0855795	-0.0107631	0.01645	-0.0040161	-0.00109346	0.0432011	0.0417465	0
34.8	-0.0181243	-0.0401881	-0.0263379	-0.0196609	-0.0263391	-0.0312505	0.0178217	0.00810751	0.0157047	0.00649981	0
35	0.00343851	-0.0249318	-0.0860219	-0.00583749	-0.00703582	-0.0766158	-0.0211013	-0.0144795	-0.04922	-0.0104462	0
35.2	-0.0369986	0.00451178	-0.0979289	-0.0591405	0.0241554	-0.0620955	-0.0331778	-0.0313439	-0.0118082	-0.0116651	0
35.4	-0.0240411	-0.0297328	-0.0746664	-0.0554704	0.0267813	-0.0415602	-0.0389054	-0.0182096	0.0411948	-0.0184339	0
35.6	0.0584424	-0.0781752	0.00534141	-0.0255801	0.016796	-0.0422402	-0.0751296	-0.0179049	-0.0190506	-0.0162181	0
35.8	-0.0238992	0.00831041	0.0121898	-0.0276884	0.0105777	-0.014258	-0.0580219	-0.0559608	-0.0377224	-0.00794104	0
36	-0.0555612	-0.0526727	-0.10375	-0.0466792	0.014425	-0.0645437	-0.0664716	-0.107594	0.0120988	-0.013945	0
36.2	-0.0176151	0.0611837	-0.00354637	0.0397215	0.0118925	-0.0157376	-0.0202122	-0.0492046	-0.0172389	-0.0412669	0
36.4	-0.00245727	0.0597591	0.0523347	0.117563	0.0153335	0.0290868	0.0516346	0.00137948	-0.0311794	-0.0217992	0
36.6	-0.0141229	-0.00830206	-0.0366474	0.060882	-0.010175	0.0315684	0.0644944	-0.00996105	-0.00117694	0.00287928	0
36.8	0.0140848	0.00761088	-0.0223108	-0.00679832	-0.0357838	0.0377054	0.0172209	0.0202422	0.0331019	0.00813021	0
37	0.0507319	-0.00278944	0.109696	0.049528	-0.00654515	0.0110482	-0.010051	0.0645622	0.0510613	-0.00155264	0
37.2	0.00965519	0.0239102	0.0861457	0.0609489	0.00568033	-0.0294996	0.01213	-0.0178811	0.0125509	-0.0653423	0
37.4	0.0291109	0.044957	0.0574768	-0.0503518	-0.00238222	0.0525721	0.00900245	0.0123239	0.00287021	-0.00987906	0
37.6	-0.0136062	0.0377756	0.0367529	-0.0261782	0.0103595	0.0377573	0.0545582	0.0189844	-0.0174575	-0.0402841	0
37.8	-0.0109259	0.000567766	0.0187518	-0.0246349	0.0215977	0.0423494	0.0660285	0.0282974	-0.00675204	-0.00648578	0
38	0.0491568	0.0182745	-0.00976987	-0.0196068	0.0219941	0.0646431	0.05389	0.088424	0.0118595	0.0229922	0
38.2	0.0633242	0.0440304	-0.0607396	0.0357934	0.0132768	0.0406069	0.0431453	0.10718	0.0108871	-0.0326218	0
38.4	0.0339065	-0.0291691	-0.102065	-0.00511366	-0.0097494	0.0502266	-0.0238903	0.0262081	0.029193	-0.00164501	0
38.6	-0.0439318	-0.0224066	-0.0853831	0.0470092	-0.00979792	-0.0191319	-0.0288754	-0.0530044	0.00117311	-0.0424854	0
38.8	-0.0851258	-0.044614	0.00296201	-0.0173176	-0.00647131	-0.034515	0.0193522	-0.02351	-0.0515958	-0.0306851	0
39	-0.0255913	-0.0377584	-0.00456181	-0.0267343	0.00322227	0.0166149	0.0106469	0.0571401	0.0120695	0.0260908	0
39.2	0.0103249	-0.0209017	0.0104021	0.00143925	-0.00574654	-0.0106102	-0.0154831	0.0305771	0.0294426	0.0208594	0
39.4	-0.00787093	0.00146353	0.0507997	-0.00761531	-0.0119218	-0.058947	0.00423766	-0.095234	0.00467792	-0.0117176	0
39.6	-0.0178185	0.0223889	-0.00683328	-0.0279178	-0.00164016	-0.0117611	0.015428	-0.101042	0.0329644	0.000958757	0
39.8	-0.0431096	-0.0110599	-0.0250637	-0.0594209	-0.0149694	0.000563618	-0.0201166	0.0344307	-0.0382267	-0.0100044	0
40	-0.00271021	0.0545688	0.0261715	0.00185378	0.0146074	-0.0388959	-0.00237528	-0.049736	-0.0473489	-0.043296	0
40.2	0.0342212	0.0433422	-0.0105257	0.0666384	0.0146437	-0.00592896	0.0172301	0.000828574	-0.024005	-0.0454151	0
40.4	0.0149089	9.28594e-05	0.0385925	0.0159511	0.00530187	0.0307778	-0.0212906	0.0629697	-0.0557257	-0.0331406	0
40.6	0.0166178	0.0160042	0.0527025	-0.0296072	-0.00281892	-0.00626304	-0.0305052	0.023018	-0.0735197	-0.0471397	0
40.8	0.0338447	0.0369925	-0.0447512	0.0181406	-0.0259479	-0.028098	-0.0193948	-0.0147393	0.0146892	-0.0368131	0
41	-0.00350229	0.0127987	-0.029058	0.0225607	-0.0302024	0.0189113	-0.0602408	0.0101589	0.0751753	0.0214343	0
41.2	0.0014794	0.0161159	0.0621841	-0.0519025	0.0104024	0.00913175	-0.0282077	0.0550058	-0.0558936	0.00980497	0
41.4	0.0396398	0.0102737	0.0994632	-0.00368121	0.0101488	0.024504	0.00821176	-0.0128684	-0.0528189	0.00424182	0
41.6	0.0163528	-0.0887614	0.0706041	0.0214694	0.0123348	0.0304513	0.0172492	-0.0437767	0.0339511	0.0362727	0
41.8	-0.0281802	-0.0478566	0.00519559	0.0239872	0.00124181	-0.00689645	0.0243837	-0.0196545	0.0697156	0.033394	0
42	-0.00417428	0.0320718	-0.03389	0.0224651	-0.00909666	-0.0455972	0.0138374	0.0045742	0.0176571	0.0243922	0
42.2	0.0149027	-0.0283533	-0.0373126	-0.0164695	0.00715635	-0.0523086	-0.0165818	-0.0038112	-0.0182205	0.063986	0
42.4	-0.0450311	-0.034463	-0.0343243	-0.0354371	0.016132	-0.0427454	-0.0219547	-0.0372312	0.0351717	0.0656533	0
42.6	0.011263	-0.016708	0.0305172	0.00991547	0.0192868	-0.0160578	-0.0134598	0.00254391	0.0122026	-0.0140363	0
42.8	0.0318732	-0.040571	0.0167141	0.0313691	-0.020128	-0.00212486	0.0441244	0.0352113	0.00468163	-0.00157068	0
43	-0.0200552	0.0398224	-0.0493271	-0.0127958	-0.0365055	0.0880116	0.0394344	0.0400983	0.0108837	0.0137786	0
43.2	0.0170301	0.0730889	-0.0520377	-0.0166096	-0.00979879	0.111684	0.0190301	0.0606337	0.0243306	-0.0219634	0
43.4	0.0396562	0.0181089	0.0276428	0.0112282	0.00883923	0.0486991	0.0395542	0.069417	-0.0100553	-0.0374519	0
43.6	-0.0467594	0.0178122	0.0913192	-0.0151161	-0.000718736	0.0515343	0.0338717	0.0183846	-0.044459	0.0123375	0
43.8	0.00556289	0.00439428	0.0428692	-0.00884096	-0.00288185	0.0574074	-0.00766075	-0.0394215	0.0657134	0.0676715	0
44	0.00607604	0.0374261	-0.0756011	0.0534239	0.00267353	0.00870558	-0.0113183	-0.0532067	0.0496365	0.0380053	0
44.2	0.0601335	0.082121	-0.0285818	0.0103742	0.0101842	-0.0283476	-0.0180716	0.00436151	0.0152069	-0.00560891	0
44.4	-0.00190109	0.00717586	0.00872244	-0.0109444	-0.00718449	-0.0172742	-0.00863912	0.0355655	-0.00688704	-0.00667114	0
44.6	-0.0525785	-0.0679185	-0.0396719	0.000151084	-0.0312086	-0.0436148	-0.0125734	0.00961386	-0.0518795	0.0115334	0
44.8	0.00216127	-0.0597495	-0.0437989	-0.0369514	-0.0186425	-0.0810204	-0.0304682	-0.0126616	-0.0492473	0.00783887	0
45	-0.0152136	-0.0396292	0.00605285	-0.0745892	0.0159027	-0.0358961	-0.0261974	-0.0322279	0.0339125	-0.00611501	0
45.2	0.00732103	0.0496411	0.0152319	-0.0651683	0.0158198	-0.0358041	-0.0442337	-0.0892256	0.0385595	0.000599292	0
45.4	-0.0154201	-0.039733	0.0105027	0.0454426	0.0102248	-0.0528249	0.0282628	-0.0507939	-0.00828951	-0.0182677	0
45.6	-0.00811068	-0.104874	-0.0137133	0.02994	0.0149651	-0.0611044	0.00220103	-0.00998057	-0.0124759	0.0235094	0
45.8	-0.0070336	-0.0363966	-0.0702687	-0.019335	0.0132151	-0.0326778	-0.0276822	-0.0159156	-0.011344	0.0637542	0
46	-0.02456	0.0105171	-0.0660657	-0.0117059	-0.0116109	-0.0274559	-0.0249914	-0.0541217	-0.0317051	0.0374195	0
46.2	-0.0426827	0.0019429	0.0404631	-0.00441701	-0.0210157	-0.0551423	-0.0386722	-0.0508344	-0.0379989	-0.00319975	0
46.4	-0.0531465	0.0515084	0.0911822	0.0239247	0.016445	-0.00225373	0.0212336	0.0395927	-0.0155822	-0.00762898	0
46.6	0.0685832	0.00329001	0.00967562	0.0523036	0.0148016	0.076025	0.0546522	0.0488037	0.0342344	0.010263	0
46.8	0.056995	-0.0120258	0.0223541	0.0255562	0.00437519	0.0755011	0.0572072	0.0522909	0.0357101	0.0249017	0
47	0.0452432	0.087644	0.0429626	-0.00445961	-0.0316902	0.0495682	0.00164703	0.0695455	0.0328531	0.0253486	0
47.2	0.0360077	0.0717206	-0.0521971	-0.0372163	-0.00401096	0.016883	-0.0623408	0.070503	0.0256765	0.0270569	0
47.4	-0.00375236	-0.00639801	-0.0567552	-0.0292465	0.0140136	0.00252266	-0.0489763	0.0160781	0.00659031	0.0110918	0
47.6	0.00566363	0.0562867	0.0711999	0.0358183	-0.0461254	0.0267087	0.0134805	-0.042255	0.0227721	-0.0433308	0
47.8	0.0141185	0.0268471	-0.0187842	0.033945	0.0257067	0.0181965	0.0159495	0.0113537	0.0435372	-0.0819275	0
48	0.0217414	-0.0199685	0.026691	0.0568489	0.0284189	0.0299176	0.00577697	0.0388447	-0.0360419	-0.0642756	0
48.2	0.0203624	0.0243049	0.0791601	0.0490817	0.00223483	0.0770319	0.0663776	0.0148267	0.0322401	0.0220069	0
48.4	0.00409631	-0.00456898	0.0784246	0.0287376	-0.00127598	0.0292412	0.0640915	0.0107679	0.0157659	0.0293726	0
48.6	-0.00878242	-0.0396684	0.0082036	-0.0192091	0.0208502	-0.0302242	0.0303434	-3.41565e-06	0.00416696	-0.0236828	0
48.8	-0.0271574	-0.0330171	-0.0360152	-0.0614223	0.0200747	-0.0138253	0.0419682	-0.0273367	0.0589106	-0.0311284	0
49	-0.0651537	-0.0877316	0.0323458	0.00153895	-0.0246868	-0.00885767	0.0114316	-0.00946793	-0.056612	-0.013075	0
49.2	-0.0654771	-0.00715272	-0.0395718	0.0652255	-0.0179445	0.0216333	-0.0393505	-0.0154194	-0.0448014	0.00524141	0
49.4	-0.0378903	-0.0282713	-0.136076	-0.00719735	-0.0153754	-0.027662	-0.057296	-0.065596	-0.0454924	-0.0198653	0
49.6	0.0253714	-0.0877997	-0.102791	-0.0743458	0.000264619	-0.0465917	-0.0279058	-0.0368214	-0.0521737	-0.00431337	0
49.8	-0.00999355	-0.0556856	-0.0161569	-0.036969	-0.00790592	-0.0593541	-0.0481287	-0.0228528	-0.0448553	0.0197488	0
50	-0.0629091	0.0117209	-0.0288954	0.0158611	-0.0163702	-0.0578773	-0.069303	-0.0513752	-0.0129826	0.021819	0
50.2	-0.0202626	0.00983637	-0.0541679	-0.015644	0.0128601	-0.0196173	-0.0253644	-0.0396507	0.00732228	0.0177628	0
50.4	-0.0353921	0.0081821	0.0251398	-0.0625282	0.0137515	-0.0539402	-0.0304129	-0.0318728	-0.0438263	0.00502952	0
50.6	-0.017116	0.0927025	-0.0751493	-0.0169529	-0.000564255	-0.0781379	-0.0225486	-0.0154446	-0.0288613	0.0402551	0
50.8	0.068536	-0.0113818	0.00865048	-0.0122199	-0.01748	0.00576593	0.0524029	0.0534751	0.0479304	-0.0108273	0
51	0.0833882	0.00816928	0.111095	-0.025532	0.00471525	0.0468667	0.0231958	0.0749449	0.0609638	-0.00496157	0
51.2	0.0384355	0.05355	0.113795	-0.0216969	0.00637789	0.0800427	0.0266804	0.0665471	0.0591453	0.00356083	0
51.4	0.0386803	0.00259267	0.104364	0.0256306	-0.00877122	0.113747	0.0848382	0.0617236	0.0603394	-0.039072	0
51.6	0.0496742	0.0254958	0.056443	0.0756963	0.0122251	0.066504	0.036748	0.0372427	0.0285255	-0.0263653	0
51.8	-0.00912569	-0.00101314	-0.0501231	0.00176693	-0.00341921	0.0606235	0.0642533	0.0438432	0.0541807	-0.0139543	0
52	-0.0135587	0.0522127	-0.0130763	-0.0017629	0.0267883	0.00948688	0.0613493	0.0219059	-0.0294053	0.0110344	0
52.2	-0.0132015	0.0121746	0.0347168	0.0530379	0.038718	-0.00419744	-0.0223751	-0.000872096	-0.0297713	0.0456452	0
52.4	-0.00178169	0.0350221	0.0459046	0.0692964	0.00437083	-0.0153455	-0.0224942	0.0218156	0.00762468	0.0692604	0
52.6	0.0389	0.0483127	-0.025932	0.0108557	-0.0143387	-0.0222506	-0.00472461	0.016923	0.0125008	0.0595005	0
52.8	0.0326374	-0.0517753	-0.0776463	-0.0631089	0.00324722	-0.0116293	-0.0519849	-0.0479781	-0.0137678	0.0154888	0
53	-0.0474132	-0.0466264	-0.00927917	-0.0603435	-0.00123078	-0.0425925	-0.034799	-0.0704508	-0.0694198	-0.00468922	0
53.2	-0.0422021	-0.0178902	-0.1335	0.00719294	-0.0258176	-0.0681196	-0.0302886	-0.0428799	-0.0354934	0.0589782	0
53.4	0.0208378	-0.0536409	-0.0496977	-0.0137413	-0.0111626	-0.0858418	-0.0145154	-0.0173108	-0.0227697	0.0593762	0
53.6	0.00390169	-0.0155196	0.0847578	-0.0764856	-0.00689469	-0.0525841	-0.0205688	-0.0356065	-0.0209345	-0.0190778	0
53.8	-0.0332098	2.43208e-05	0.040384	-0.0132335	-0.0205946	0.0342544	-0.0151335	0.0114834	0.00189512	-0.0779281	0
54	-0.00721075	-0.0217252	-0.0227111	0.04896	-0.0213721	0.0770642	0.0269151	0.0368235	0.0134114	-0.0575769	0
54.2	0.0170198	-0.000874137	0.0187646	0.0184735	0.000356324	0.0480077	0.0494632	-0.00525429	-0.00966584	-0.0260522	0
54.4	-0.00349874	-0.01469	-0.0217659	0.0804233	0.0257353	0.0526453	0.0265517	0.0700268	0.00354742	-0.0562584	0
54.6	0.0210692	0.0738075	-0.0174129	-0.0428781	0.00846559	0.0481958	0.0254249	-0.0431376	0.0984387	-0.033112	0
54.8	-0.00509205	0.0664971	0.0763736	-0.0263922	0.00371967	0.0500751	0.0184828	-0.0273542	-0.00177942	0.00714833	0
55	0.0273555	0.0529724	0.0693157	0.00578688	0.00747435	0.0367774	0.0190527	0.0482034	-0.0367994	0.00158778	0
55.2	0.0429527	0.0538231	0.043283	0.00762142	0.0165247	-0.00852098	0.0230364	0.0267778	0.0390239	-0.00905593	0
55.4	0.00835751	0.0121979	0.037685	0.0571804	0.0098303	-0.0227273	0.0313722	0.00401531	0.0357884	0.0174378	0
55.6	0.0369779	-0.0240168	-0.0208003	0.0522999	-0.0248921	0.0123948	0.0463262	0.0261494	0.00117413	0.0304239	0
55.8	0.00867369	-0.0399322	0.0705406	-0.0157389	-0.0225183	-0.0192994	0.0192309	-0.0442104	0.0290504	0.0066517	0
56	-0.00590851	-0.0149466	0.05132	0.0398281	-0.0274332	-0.0531667	-0.00640508	0.00722709	-0.0101571	0.0417047	0
56.2	-0.0112013	-0.00655736	-0.0202879	0.0105054	-0.010055	-0.0758377	-0.0653669	-0.0253431	-0.0255595	0.0233587	0
56.4	-0.0461201	-0.0476552	-0.070601	-0.0674419	-0.00142522	-0.0880514	-0.108493	-0.0683847	0.00116234	0.0554336	0
56.6	-0.0399144	-0.0733079	-0.12877	-0.0843824	-0.00187398	-0.0721602	-0.0831454	-0.0418153	-0.00117098	0.0915142	0
56.8	-0.00967505	-0.0518519	-0.119376	-0.040619	0.0139726	-0.0558074	-0.0551264	-0.0506184	-0.0462592	0.057584	0
57	-0.0665466	-0.0392813	0.000168803	0.0122555	0.00738448	-0.0591263	-0.0830384	-0.0817012	-0.0512118	0.0861415	0
57.2	-0.0553084	-0.0309663	-0.0399244	-0.0480141	-0.0192358	0.000573631	-0.0570064	-0.013842	0.0363232	0.0673236	0
57.4	-0.0426787	-0.0720436	-0.00279475	-0.050614	0.0407457	-0.0106415	-0.0105555	0.0352946	0.0421137	0.0415163	0
57.6	-0.0183115	0.0305037	0.0707273	-0.0267478	0.0272556	0.0118152	-0.0104068	0.000315972	0.0295723	0.0442381	0
57.8	-0.00964801	0.0188365	0.0641755	-0.0126212	0.000975942	0.0182499	-0.00504627	0.00406554	0.0330023	0.0295759	0
58	0.00395723	-0.0752298	-0.000324512	-0.00537891	0.0241044	-0.0171117	0.0162329	0.0347155	0.0455688	0.0251134	0
58.2	0.0354789	0.0347164	-0.00233686	0.00825786	0.0175385	-0.012459	0.00158873	-0.00188231	0.0187809	0.0572514	0
58.4	-0.00683847	0.0600306	0.0731498	0.0221085	0.0192136	-0.0256598	-0.00608144	-0.000482766	-0.0671192	0.0370825	0
58.6	-0.0154943	0.0106885	-0.00412345	-0.0823883	0.0091774	-0.0353769	0.00939003	0.0135917	0.0856205	0.0371527	0
58.8	-0.0496503	-0.000766773	-0.0176231	0.031013	0.000314577	-0.0117061	-0.0446606	-0.0120519	0.0534198	0.00311835	0
59	-0.0610411	-0.0488055	-0.0265947	0.0708197	-0.0127181	-0.0282084	-0.0587527	-0.0334561	-0.0473563	0.0614555	0
59.2	-0.0136183	-0.035138	-0.0519364	-0.0288833	-0.0119559	-0.0291962	-0.064465	-0.0731778	0.018798	0.0862754	0
59.4	-0.00134902	0.0163418	-0.0620194	-0.00732502	-0.00607735	-0.0132298	-0.0845479	-0.10987	0.0681426	0.0429018	0
59.6	-0.0515167	-0.0514402	-0.0815137	0.0645694	-0.0153842	-0.0684049	-0.0493838	-0.0816773	-0.00743602	0.109242	0
59.8	-0.0152925	-0.0162158	-0.0173015	-0.0338353	0.0157611	-0.0656349	-0.0937307	-0.0748041	0.0888115	0.0899733	0
60	0.0188475	-0.0346367	-0.0109098	-0.0663673	0.0349141	-0.0497212	-0.062181	0.044352	0.00561415	0.0715463	1
60.2	0.0705832	0.040975	0.112343	0.049643	-0.0027684	0.0259499	0.0312523	0.178574	0.0160479	0.104659	1
60.4	0.0692541	0.125095	0.0545103	0.0921087	-0.0247235	0.0628469	0.111433	0.159918	0.130933	0.142732	1
60.6	0.0927037	0.137502	-0.00190382	0.0656398	0.00982257	0.106379	0.132469	0.109306	0.177544	0.125305	1
60.8	0.15339	0.177844	0.163727	0.0975909	0.0302698	0.188782	0.148631	0.175738	0.156167	0.0891559	1
61	0.0677104	0.205332	0.105805	0.0939812	-0.00916148	0.150717	0.219268	0.214475	0.121186	0.0936935	1
61.2	0.0484724	0.0896655	0.112405	0.104844	-0.0306293	0.152832	0.196647	0.182518	0.0912678	0.0624294	1
61.4	0.0226699	0.153482	0.0396556	0.142979	-0.0234597	0.136729	0.169376	0.197229	0.107103	0.132738	1
61.6	0.000305117	0.0797989	0.0793504	0.101054	-0.00538787	0.0708106	0.170512	0.155592	0.131336	0.142666	1
61.8	-0.00519543	-0.0246005	0.0620987	-0.0291093	0.00345747	0.0187887	0.16056	0.0660302	0.110226	0.107338	1
62	-0.042793	0.00069054	-0.0291837	-0.0475756	-0.00305532	0.0363168	0.12138	0.0568047	0.10648	0.125186	1
62.2	-0.0959989	-0.0227341	0.0206766	0.0716472	-0.016306	0.0751005	0.074017	0.101536	0.112388	0.142435	1
62.4	-0.0845888	-0.0119078	-0.00263222	0.0233107	-0.0160645	0.0328441	0.0418768	0.0623874	0.00584692	0.12789	1
62.6	-0.0940844	0.0233996	0.0776714	-0.0438833	0.0223122	-0.04504	0.0389515	0.0413127	0.0767803	0.0891336	1
62.8	-0.0838066	-0.0420851	0.0319596	0.0179102	0.0138288	0.0210562	0.0494731	0.110284	0.101826	0.0703538	1
63	-0.0881778	-0.0205957	-0.0351309	0.0174864	0.0395274	0.0297832	0.0328287	0.136971	0.121681	0.0454065	0
63.2	-0.0773936	0.0298393	-0.000467604	-0.0251627	0.0444879	-0.00139854	0.0344069	0.0856864	0.147033	0.00968592	0
63.4	-0.0281975	-0.0413938	0.0291041	0.010099	-0.00454972	0.0115054	0.0505469	0.0458799	0.0857486	-0.00317447	0
63.6	-0.0308019	-0.0557363	-0.00443706	0.0198648	0.00617567	-0.0449967	0.0255708	0.0353817	0.0247549	-0.00804717	0
63.8	-0.0803729	0.0423799	-0.00927469	-0.00636142	-0.0144985	-0.0133295	0.0586077	0.0361345	0.0398019	-0.038732	0
64	-0.0756952	-0.0402715	-0.0310697	-0.0122443	0.0063124	0.0331319	0.0608806	0.0985193	-0.00908719	-0.00971977	0
64.2	-0.0570031	-0.0213842	0.00277553	0.0452124	-0.00894787	0.0351161	0.0832031	0.0947731	0.069889	-0.00417888	0
64.4	0.000458568	0.0442936	-0.00270948	0.06225	-0.0227687	0.0551809	0.0872298	0.101769	0.0589487	-0.00554973	0
64.6	0.0547825	-0.0281822	-0.0222777	0.0134434	-0.00967582	0.100057	0.105662	0.139302	0.0266648	0.000795175	0
64.8	0.0372626	-0.0964336	0.0266438	-0.00754573	0.00192063	0.105113	0.153964	0.120925	0.133857	-0.00563337	0
65	0.0303232	-0.0153939	0.0262887	-0.00443286	0.0366388	0.0801499	0.104243	0.101857	0.0441271	0.0194294	0
65.2	0.0374447	0.00995297	0.04295	-0.0444175	0.0252581	0.0651623	0.0953897	0.0813804	0.0175103	0.0262997	0
65.4	-0.043931	-0.0640128	0.024573	-0.0521018	0.0161111	0.0516755	0.0915736	0.0986309	0.0522887	-0.00879222	0
65.6	-0.0154623	-0.0409305	-0.0465896	0.0292679	0.0202975	0.0386061	0.0381281	0.0651809	0.0266952	-0.0325167	0
65.8	0.0247245	0.0418367	-0.0359351	0.0440178	0.0116329	0.024811	0.0294084	0.0543195	-0.0074369	-0.0366328	0
66	-0.0248943	0.0363351	0.0330405	0.0199573	-0.0037267	-0.00164617	0.0358265	0.0402565	-0.0147571	-0.0386137	0
66.2	-0.017289	-0.00599781	0.0189285	0.0720394	0.00422079	-0.00845786	-0.00148512	-0.0230081	-0.0271232	-0.0341513	0
66.4	-0.00619485	0.011102	0.0187242	-0.0180166	0.0174999	0.0395787	0.0684084	0.0790903	0.0307243	-0.0382401	0
66.6	-0.020133	0.00474942	0.00472805	-0.0508618	-0.0134842	-0.00222513	-0.0192363	-0.000599666	0.0436803	-0.0532209	0
66.8	-0.0225515	-0.00187826	-0.0253628	-0.00328783	-0.0188694	0.0059442	-0.0284763	-0.0175844	0.0323759	-0.0315024	0
67	-0.0105308	-0.0231493	-0.0149627	-0.0506618	-0.0123993	0.0130134	0.00134535	0.00565992	-0.0284296	-0.0041855	0
67.2	-0.00680308	-0.032403	-0.00636718	-0.0568879	-0.011978	-0.00244208	-0.00729958	-0.0354177	-0.0321801	-0.00959691	0
67.4	0.000750237	-0.0188459	-0.0309143	0.0427151	0.00219198	0.00213538	0.00295356	-0.0523003	0.0418267	-0.0079391	0
67.6	0.0270995	-0.00725363	-0.0198181	0.00771052	0.0105439	-0.000612683	0.0126325	-0.010458	0.0298498	0.0306421	0
67.8	0.0283989	0.066779	-0.00393816	0.0038131	-0.015735	0.0404676	-0.00186758	-0.00962182	0.0336741	0.0234866	0
68	0.041385	0.00635831	0.0198794	0.00322431	-0.021342	0.00683569	-0.022114	0.041659	0.00540211	-0.0187125	0
68.2	0.0144864	-0.00907067	-0.0139565	-0.0428066	0.00589977	-0.0135046	-0.0147507	0.0666376	-0.0334365	-0.0174706	0
68.4	-0.00543928	-0.0207071	-0.0467776	-0.0418772	0.0308644	0.0418912	0.0114577	0.0320297	-0.0202344	-0.0048255	0
68.6	-0.00332169	-0.00119199	0.0163544	-0.00370006	0.0254597	0.0393614	0.0316829	0.00346275	-0.00895755	-0.0151867	0
68.8	-0.0214037	0.0841939	0.0655663	-0.00439098	0.0133513	-0.0513949	0.0206139	0.00242697	-0.0278627	-0.0159433	0
69	-0.0177878	-0.0143947	-0.0195771	0.0304979	0.0240451	-0.0283531	-0.0205825	-0.0231527	0.0177227	-0.00287655	0
69.2	-0.00843926	-0.0429558	0.0514082	0.063982	0.00398131	0.0141605	-0.00438744	-0.0537603	0.000504191	0.00640644	0
69.4	-0.0078751	-0.0281908	0.0656433	0.0117789	-0.00204536	-0.0178392	0.0133695	0.0021708	-0.0640392	-0.0158674	0
69.6	-0.0241565	0.00551556	-0.00338104	-0.0021107	0.00319636	-0.0344536	-0.00800115	0.0268759	-0.052024	-0.0244614	0
69.8	-0.00174887	0.0151261	-0.0487017	0.0243772	0.00134841	-0.0331742	-0.0228438	0.00339299	0.0117159	0.00625565	0
70	0.0149529	0.00544123	-0.013698	-0.00188774	-0.0154369	-0.0235715	0.00090784	-0.00973305	0.0411951	0.0133642	0
70.2	-0.0346985	0.0107479	0.0347149	-0.0242684	-0.0347655	0.0231027	0.0262863	-0.0263942	0.0197838	-0.0215121	0
70.4	0.00244614	-0.016388	-0.0142787	0.0329263	-0.0209138	0.0141711	0.0259893	-0.0152069	-0.0390714	-0.000397434	0
70.6	0.0306032	0.0760733	0.0521103	0.0191133	-0.0158973	0.0305431	0.0132331	0.0215388	0.0059409	-0.0121839	0
70.8	0.0227491	0.0450248	-0.0211195	0.0280202	0.011033	0.0055569	0.0175859	0.0347483	-0.0138368	-0.00628083	0
71	0.0355102	-0.0356979	-0.0555845	0.0186598	0.00729141	-0.00016325	-0.00881156	0.0327813	-0.0199466	0.0074216	0
71.2	-0.00842602	-0.0142206	-0.0104972	-0.0321894	-0.0307649	0.0223051	-0.043729	0.018467	-0.00682921	0.0128757	0
71.4	-0.0675974	0.0217601	-0.0163263	-0.0220948	-0.0146352	0.013719	-0.0354834	-0.010972	-0.0193845	0.0135716	0
71.6	0.0218098	-0.0221152	0.0269566	0.0286443	0.0372643	-0.00249685	-0.0203888	-0.0268237	0.0483709	-0.00628785	0
71.8	-0.000103661	-0.0576053	-0.0319701	-0.03536	-0.00841273	-0.0438319	-0.0044704	-0.0493723	0.0407013	-0.00669342	0
72	0.012267	-0.0547195	-0.0353115	-0.0305444	0.0131832	-0.0606611	-0.0137171	-0.0999475	-0.0279004	-0.0214703	0
72.2	-0.0107691	-0.0536875	-0.0165834	0.00042928	0.0315238	-0.0247573	-0.0068763	-0.063964	-0.0128721	-0.00830005	0
72.4	-0.0223775	-0.0123288	-0.0243215	-0.0126584	0.00394712	-0.0233117	-0.0166776	0.0222286	0.0359097	-0.0191275	0
72.6	-0.00515474	0.0195194	-0.0192473	-0.0181949	-0.001643	-0.0136848	-0.0258788	0.0303078	0.0103618	-0.0252979	0
72.8	-0.0307681	-0.0164256	0.00774324	-0.0033528	0.0152132	0.0499241	0.00670021	-0.0191582	-0.0455385	0.0112423	0
73	-0.0086023	0.00400678	0.0159053	-0.0303199	-0.00683348	0.0161674	-0.00216975	-0.00565935	-0.0285364	-0.0441516	0
73.2	0.0138167	-0.00548077	0.0420549	0.0128345	-0.00886844	0.0462342	-0.00772157	0.0183213	0.0428808	-0.0449031	0
73.4	-0.0160807	-0.00678294	0.0703074	0.0806097	-0.0152384	-0.00129972	0.00755784	-0.0142487	-0.0444634	0.0122577	0
73.6	-0.0109397	0.0284527	-0.0592828	0.035511	0.0141193	-0.0234507	0.013268	0.0344628	-0.0374561	0.0168468	0
73.8	0.0210215	0.0212098	-0.0484908	-0.0573487	0.0269426	-0.0118178	-0.00712715	0.0335103	0.0259761	-0.00152953	0
74	0.000407274	-0.00749561	0.0914871	-0.0851789	0.00144337	-0.0292855	-0.0272874	-0.073065	-0.0311066	0.00779563	0
74.2	-0.0173505	0.0335906	-0.0435039	-0.0603079	-0.00957807	0.0013014	0.00114192	-0.0399227	-0.056807	-0.00882657	0
74.4	0.0397672	0.0254978	-0.0112394	0.0190887	-0.0674628	0.0331481	0.0462959	0.0232245	-0.0300821	-0.0350167	0
74.6	-0.020853	-0.00229116	0.0722717	0.00701304	0.000390958	-0.0363583	-0.0766427	-0.0388356	-0.0140507	-0.0506255	0
74.8	-0.0150782	-0.0661173	0.0464176	-0.0542323	0.00784053	-0.0349566	-0.0465404	-0.0238445	-0.0137903	0.00357307	0
75	0.0237104	-0.0592096	-0.00979772	0.00631427	-0.00931064	-0.0159706	0.0269811	-0.0141463	0.0220631	0.0126641	0
75.2	0.0128462	0.00563412	-0.0480248	0.0490801	0.00976603	-0.00725519	-0.0206652	-0.00876783	0.0433324	-0.0231834	0
75.4	0.0184641	0.0273474	-0.0543681	-0.0251439	0.0100857	0.0191477	-0.0415027	0.0546764	0.0340316	-0.00527023	0
75.6	0.0339862	0.0448705	0.0302059	0.0435854	0.00985733	-0.0110393	0.0260263	0.0126667	0.0670458	0.0100581	0
75.8	-0.00611365	0.0323677	0.0350067	0.0993093	-0.0240595	0.0361859	0.0430198	0.00627602	0.0087651	0.0181861	0
76	-0.0163249	-0.0341306	-0.0206248	-0.000349726	-0.0120926	-0.0239517	-0.0104731	-0.00591902	0.0494209	0.0345569	0
76.2	-0.0164027	-0.0529946	-0.0114052	0.00533893	-0.0128208	-0.0164108	-0.00804358	-0.0259488	0.0464766	-0.00954018	0
76.4	-0.0211891	0.00554988	-0.0243155	0.0264497	-0.0230666	0.0281444	4.51814e-05	0.00640498	-0.0234723	-0.0313385	0
76.6	-0.00802365	0.0650788	-0.0567651	-0.038586	-0.000395587	-0.00177999	-0.00516142	0.0456662	-0.0364693	0.0223282	0
76.8	0.023471	0.0501486	0.00764054	-0.0130168	0.0272623	-0.00279791	0.0292546	0.0183477	0.0222101	0.0530043	0
77	0.039463	-0.00527996	0.0299071	0.0417174	0.0296924	0.038523	0.000847917	-0.0098741	0.0664	0.0439868	0
77.2	-0.00905523	0.0645627	0.00854955	0.0121529	0.00666766	0.0110247	0.0246104	-0.0563739	-0.0468666	0.0336059	0
77.4	0.0113948	0.0440807	0.0250005	-0.0833406	0.0130324	-0.0204781	0.0325209	-0.0150242	-0.0422612	-0.0133739	0
77.6	0.000991969	-0.0194816	0.0318659	-0.0672792	0.0220649	-0.0225096	-0.0143337	-0.00600324	-0.019845	-0.000974465	0
77.8	-0.0239781	-0.0390975	-0.0142009	-0.0179545	0.00542952	-0.00885469	-0.0307918	0.00770008	-0.0558638	0.0137979	0
78	0.01336	-0.0418597	-0.0556997	-0.0162647	-0.0104654	0.00661515	-0.000562754	0.085269	-0.0245009	-0.0206243	0
78.2	0.00874063	-0.0150765	-0.0731879	0.0521776	-0.00860375	0.0195347	0.0120567	0.0764225	0.0643183	0.0043079	0
78.4	-0.0273223	0.0214235	-0.114814	0.0536596	-0.00996821	0.0389216	0.0523656	0.0249649	0.0718369	0.000681124	0
78.6	-0.0050844	-0.0272102	0.0279049	0.0520861	0.00448979	0.0264439	-0.0188792	-0.0258209	-0.0294862	-0.0189826	0
78.8	-0.0145186	0.000775374	0.08019	-0.0148121	-0.00874492	-0.0216833	-0.0488201	-0.000697235	-0.0567381	-0.0285085	0
79	-0.0113803	-0.0173143	-0.0116213	-0.0430069	-0.0109483	-0.0406701	-0.0217922	-0.00824025	-0.0156175	-0.0114107	0
79.2	0.00835527	-0.0625177	0.039953	0.00508182	-0.00542647	-0.0228301	-0.0263334	-0.0641813	0.0046828	-0.000175372	0
79.4	-0.0203375	0.00593293	0.172725	0.0175431	-0.0050468	-0.0154703	-0.0342919	-0.0338279	-0.0131854	0.00706617	0
79.6	-0.0212741	0.00133321	0.0334796	0.00644409	0.0364059	-0.0270331	-0.00780092	0.0305642	-0.0322003	0.0370445	0
79.8	0.00832426	-0.0436904	0.00218155	0.00749295	-0.0124906	-0.0643673	-0.0312575	-0.0481299	0.0538108	-0.0428611	0
80	-0.0247264	-0.0337843	-0.0846727	-0.0615351	-0.0225242	-0.0282187	-0.00666814	-0.0994093	-0.00609734	-0.0264449	0
80.2	-0.022044	0.0278404	-0.0751695	-0.0771284	-0.00578009	-0.037236	0.0143458	-0.0501787	-0.0695922	0.0121086	0
80.4	0.00734756	0.0176874	0.00280768	-0.00912369	0.00207044	-0.0299916	-0.0292777	-0.00792882	-0.0306106	0.00424055	0
80.6	-0.00181262	-0.026515	0.00727098	0.0245287	0.000184726	0.0329606	-0.00495361	-0.004873	-0.00390057	-0.0238477	0
80.8	0.0012819	0.0097126	-0.0111731	0.00317153	-0.00137212	0.038377	0.0782067	0.0327779	-0.0170319	-0.0718826	0
81	0.0336719	-0.00895779	-0.047852	0.0231643	0.0271405	0.0513105	-0.0581817	0.0454056	0.0137942	-0.0763884	0
81.2	0.022774	-0.0196826	-0.0416201	0.0382372	-0.00900875	-0.00988789	-0.0205872	-0.0529456	-0.0366344	0.0175622	0
81.4	-0.0360893	0.00351907	-0.028437	0.0165483	0.0101985	-0.0141202	-0.0172268	-0.0573319	-0.0261726	0.016895	0
81.6	-0.0226311	0.0418248	-0.06405	-0.0546715	0.0200724	-0.00358477	-0.0261145	0.0166136	0.0257294	-0.0146239	0
81.8	0.0211379	0.0592346	-0.0178272	-0.0345929	-0.00491516	0.0203751	0.00912675	0.0218287	0.0235782	-0.0254494	0
82	0.00827759	0.0283021	0.120619	0.052248	0.0134749	0.0608834	0.0441834	-0.0114135	0.0104912	-0.0288317	0
82.2	0.0194506	-0.012408	0.103558	-0.0281026	0.0350118	0.0274334	0.0873698	0.0299745	0.0362615	0.0269097	0
82.4	0.0432526	0.0172809	-0.0053	-0.0796165	-0.00144348	0.0394276	0.0249578	0.051123	0.00590758	0.02199	0
82.6	0.0109324	0.00665153	-0.015239	0.0100351	-0.000972526	0.00310371	0.0313758	0.02095	0.0185638	-0.0307905	0
82.8	-0.0270527	-0.0586604	-0.00394483	0.103864	-0.00225308	-0.0316669	-0.00195031	-0.0248017	0.0341819	-0.025958	0
83	0.00980405	-0.0543554	-0.0202811	0.0600194	-0.0291054	-0.0139692	0.0138225	0.0104846	0.0104968	0.00624212	0
83.2	0.0394689	0.0158331	-0.0216374	-0.000711885	-0.0301419	0.00833805	0.0394873	0.0589875	-0.0358577	0.0266925	0
83.4	-0.0127385	0.0289806	-0.0176262	0.029325	-4.50635e-05	0.0010515	-0.0387969	0.0241534	-0.0490532	0.0468269	0
83.6	-0.0234986	0.00502424	-0.0362879	-0.000641296	-0.00187453	-0.00573258	-0.00240084	0.0200046	-0.00104081	0.0391932	0
83.8	-0.0202355	0.016589	0.0084304	0.0111146	-0.00883408	-0.0401889	-0.000608434	-0.00930579	-0.0162322	0.0444506	0
84	0.0110822	0.0059635	0.0653132	-0.0113346	-0.0189819	-0.0346634	-0.0376237	-0.0584964	0.00510706	-0.0411713	0
84.2	0.00503775	-0.00570771	0.0386833	-0.0119345	-0.00729597	0.0100161	-0.000276697	-0.00831965	0.0044039	-0.048646	0
84.4	-0.0062497	-0.00760398	0.0115486	0.010748	0.0085081	0.00901956	0.0288776	0.0614331	0.000765676	-0.0169649	0
84.6	0.0270031	-0.00342628	0.0323507	-0.0208576	0.0175195	-0.00912681	0.00727362	0.00122376	0.0331086	-0.0430664	0
84.8	0.0245336	0.0373004	0.00426048	-0.0525855	0.0410184	0.0325643	0.0173538	-0.0732973	0.0265181	-0.0217027	0
85	-0.0318807	0.0777694	-0.026241	0.0177132	0.0377086	0.0245472	-0.0442922	0.0172511	-0.00548428	0.00297812	0
85.2	0.0248946	0.00252199	0.00421013	0.00100939	-0.00345093	0.0104419	-0.0504305	-0.00396451	-0.049917	0.00962969	0
85.4	-0.000935662	-0.0683951	0.0283595	-0.0114446	-0.00126267	-0.00992673	0.00504123	-0.0427501	-0.0400177	0.0277335	0
85.6	0.0105887	0.018468	0.0415526	0.0472952	-0.00599112	0.0053305	0.035547	-0.0455506	-0.00189163	-0.0177929	0
85.8	0.0472492	0.049717	0.0500378	0.0505732	-0.0209937	0.0321375	0.00972696	-0.0370906	0.00611278	-0.0636733	0
86	0.00456635	-0.0571837	0.0137805	0.015714	-0.0138708	0.0187306	-0.0286255	-0.00139447	-0.00872395	-0.00902621	0
86.2	0.0419541	0.00978037	-0.0469439	0.085464	-0.0275656	0.00282278	-0.023353	0.0335174	0.00914577	0.0252284	0
86.4	0.0200768	0.0392329	-0.0372705	0.00561263	0.00292008	-0.00739399	0.0322173	0.00168441	0.0556184	-0.0175104	0
86.6	-0.0569122	-0.0330261	-0.0431185	-0.040975	0.006016	0.00484088	-0.00814439	0.0208615	-0.0386835	-0.00230786	0
86.8	-0.054519	-0.0296456	-0.00950267	-0.0268121	-0.00893983	-0.0205503	-0.0190363	-0.000498631	-0.0367088	0.00999966	0
87	-0.0317594	0.00557068	0.0198774	-0.00251836	0.00442425	-0.0546086	0.0103221	-0.0105867	0.0557102	0.0215859	0
87.2	-0.0199087	-0.00875472	0.00227436	-0.0279062	-0.000641275	-0.0385894	0.0101343	0.0226095	0.048984	0.0104669	0
87.4	0.0137025	-0.0154487	-0.0036784	-0.0538747	-0.0371416	-0.00957024	-0.000683364	0.0101458	0.00508365	-0.0283752	0
87.6	-0.0276596	-0.0264404	-0.0150125	0.0502629	0.00398948	-0.00836327	-0.0154218	0.000944719	0.0358994	0.0389643	0
87.8	0.00563706	-0.0132706	-0.0427872	0.0102605	0.0103288	0.0313558	-0.00725137	-0.00637648	-0.0638042	0.002967	0
88	0.0031742	0.0335889	0.0265685	0.00383148	-0.00739485	0.00174794	0.00361285	0.0560575	-0.0414921	0.0322351	0
88.2	0.0264757	0.003001	-0.00106352	-0.0146988	0.0371686	0.0103925	0.0279185	0.024784	0.0191861	0.0481302	0
88.4	0.0138011	0.0133558	-0.0386662	-0.0358017	0.02905	0.033801	0.0194356	-0.00965574	-0.00521818	0.0400961	0
88.6	-0.0389553	0.0650406	0.0661956	2.82057e-05	-0.0426023	0.0137497	0.0121479	0.0368606	-0.0122581	0.0467636	0
88.8	0.00935685	-0.0275661	0.0778274	0.015567	-0.00766419	0.0344891	0.0787588	-0.0182244	0.0414148	-0.000756024	0
89	-0.0183012	-0.00346902	-0.0566846	0.0443222	-0.00386156	0.00604459	0.0523408	-0.0601027	0.0239373	0.00871265	0
89.2	0.0157813	0.0443102	0.00877856	0.00742441	0.00801513	-0.024351	-0.0069094	-0.0294922	-0.000608128	0.00928954	0
89.4	0.0315591	-0.00720168	0.0447312	-0.060503	0.0273782	0.0160884	-0.0284665	0.0429002	0.0217494	-0.0037527	0
89.6	0.0310444	-0.0514996	-0.00921149	-0.0705777	0.0306688	0.00975644	-0.0151991	0.0366975	0.0278962	-0.00532176	0
89.8	0.0139426	-0.020016	-0.0677589	-0.0442585	-0.000281511	-0.0309593	-0.0162093	0.00814665	-0.0345552	-0.0238745	0
90	-0.0226496	0.00633546	-0.1086	-0.0328128	-0.0237078	-0.00651873	-0.0300961	0.023296	-0.0762127	-0.0362217	0
90.2	0.00550004	-0.0141427	-0.0639493	-0.0146926	0.00377723	-0.00559535	-0.0205016	-0.0202995	-0.018715	0.0175321	0
90.4	-0.00880442	-0.0506076	0.0261971	-0.0339528	-0.0308409	-0.0143291	-0.0511308	0.0168802	-0.0225785	-0.000213693	0
90.6	-0.03214	-0.0246742	0.0119319	0.00566582	0.00200056	-0.0107653	-0.0254262	-0.0319229	-0.000244828	0.0330245	0
90.8	0.0141217	0.00118664	-0.0322455	0.00317155	0.0152988	-0.00971382	-0.0159166	-0.0297131	0.0443509	0.0322868	0
91	0.00947832	0.00038264	0.0172323	-0.00106693	-0.0161581	-0.0437748	-0.0345264	0.0056951	0.0814678	-0.023982	0
91.2	-0.0205894	0.0269398	0.0531069	0.0225845	-0.0239828	-0.0255655	-0.0233622	-0.00586739	0.0586622	-0.0235965	0
91.4	0.0302488	0.0474175	-0.0148958	0.00507069	-0.000473106	0.0507989	0.00767426	0.00559254	-0.0218219	0.0318714	0
91.6	-0.034987	-0.0201543	0.016071	0.0303146	0.0317119	-0.0141517	0.0253432	0.00534014	-0.0345826	0.0155234	0
91.8	-0.0272456	0.0129818	0.0324686	0.0108105	0.0104489	0.0362338	0.00634547	-0.0163972	-0.0890447	-0.019407	0
92	-0.0151406	0.00659479	-0.000547578	0.0247262	0.0117425	-0.0185207	-0.0131833	-0.0493828	-0.0161951	0.0061961	0
92.2	-0.0174955	-0.059965	0.0116489	0.0265567	-0.00463827	-0.00398528	0.00167587	0.0114808	0.0489345	0.00613	0
92.4	-0.0172569	-0.0603487	0.0204141	0.0103415	-0.032104	0.0608047	0.0016721	0.0573528	0.0280397	-0.0261106	0
92.6	0.00592361	-0.00588371	-0.01835	0.0108161	-0.0096183	0.00190464	-0.0361774	-0.0152308	-0.00164853	-0.0289804	0
92.8	0.047555	-0.00422098	-0.0186639	-0.00597711	0.0210085	-0.0329657	-0.0128087	-0.0484241	-0.0398566	-0.0219625	0
93	-0.00514124	0.028143	-0.0495627	-0.00719674	0.0117151	-0.0287934	0.0844362	-0.0210298	-0.0257926	0.0116121	0
93.2	0.0119618	0.0679769	-0.0319781	-0.0333544	0.00569409	0.0478201	0.0251181	0.00702063	-0.00973386	0.0347685	0
93.4	0.00527043	0.0277165	0.0038691	0.0565034	-0.00579218	-0.0199514	0.029545	-0.00978842	0.0358494	-0.00389309	0
93.6	-0.00497567	0.00258354	0.0334352	0.0738551	0.000168875	-0.0212212	0.0464543	0.0258355	0.100823	-0.00837726	0
93.8	0.0115295	0.0373596	0.0304866	-0.0432104	0.0129152	0.0499714	0.0143389	0.0942171	0.0576528	-0.00441011	0
94	0.00899636	0.0187069	-0.0175937	-0.0696864	0.0059388	-0.0149517	0.0187246	0.0613285	-0.0476654	-0.0371765	0
94.2	0.0211026	-0.0502162	-0.0303558	-0.0160186	0.0242827	-0.00165317	-0.0232871	-0.0170669	0.00203732	0.034788	0
94.4	-0.00460426	-0.027726	0.0300377	0.00905368	0.0367054	-0.00590143	-0.00785954	-0.0157605	-0.0350401	0.0444379	0
94.6	-0.0109147	-0.0378876	0.0526165	0.0445101	-0.0336253	-0.0105807	0.029545	0.00284487	-0.0596695	0.00779092	0
94.8	0.025379	-0.0373778	0.0528429	0.0284649	-0.0314642	-0.00476879	-0.00342309	-0.0273251	-0.0555358	0.0121606	0
95	0.00554268	0.00527459	0.0303861	0.0152242	0.010285	-0.0249395	-0.0443222	-0.050067	-0.0499661	0.0282478	0
95.2	-0.0386682	0.0422217	-0.0264755	0.0288269	-0.0171471	-0.044612	-0.0218216	-0.0400963	0.0127355	0.0114178	0
95.4	0.00942431	0.0438807	-0.063079	0.0131909	-0.0301134	-0.000712922	-0.00159972	-0.0264185	0.0718666	-0.0181899	0
95.6	0.0218779	0.00227027	-0.0280251	0.0690338	0.0129372	0.0373115	-0.0209372	0.0332903	-0.0466195	-0.0542547	0
95.8	0.00346611	0.00930923	0.0975194	0.043325	0.0255307	-0.0185593	-0.0235293	0.0235237	-0.00359644	-0.0235958	0
96	-0.0435552	0.0132312	-0.0141383	-0.0804021	-0.00409383	0.0145409	0.00198371	0.0300872	0.040282	-0.0324065	0
96.2	-0.0360685	-0.0162784	-0.0497507	-0.0743605	-0.0117465	0.0187369	0.0121786	0.00684985	0.0302298	-0.0105865	0
96.4	0.0110596	-0.0285273	0.00679865	-0.00289314	-0.00288744	-0.0158737	0.0251447	-0.0648701	0.0339411	0.0144282	0
96.6	0.0283626	-0.00071058	-0.0542375	-0.0489914	0.00388792	0.0274115	0.0293059	-0.0514687	0.0310914	-0.0182634	0
96.8	0.0352689	0.0193478	0.0152532	-0.0866219	0.0251534	0.0368534	-0.0238494	0.0554288	-0.00356292	0.00241494	0
97	0.0100813	0.0118472	0.0725322	-0.0667357	-0.0154642	-0.00217464	-0.00159854	0.0329383	-0.0278856	0.0165962	0
97.2	0.00846426	-0.0365413	-0.00725593	0.000234693	-0.00813956	0.0116544	0.00901252	0.00765239	-0.0521107	0.0471656	0
97.4	-0.0102379	-0.035225	0.00217198	0.0512412	0.0139553	-0.0262104	0.0175812	-0.00853358	-0.00131525	0.0143312	0
97.6	-0.0233307	0.0180374	0.038202	0.00553357	0.00258642	-0.0119411	0.0164075	-0.02054	0.0428124	-0.0036869	0
97.8	0.00543156	0.0332659	-0.0111664	-0.00343395	-0.00849889	0.0129333	-0.0116484	0.00937511	0.0142677	-0.000832233	0
98	0.0239715	-0.0102176	-0.0111438	0.0787999	0.00476611	-0.0418091	-0.0264889	0.0522309	0.00387494	-0.023717	0
98.2	-0.0062904	-0.0247734	0.0473832	0.010003	0.00793183	0.0547764	-0.00334481	0.027492	0.0260843	0.0380322	0
98.4	-0.0212684	0.0188114	-0.0135712	0.0482809	0.00702859	0.0101509	0.0108231	-0.0145688	-0.0254075	-0.0130684	0
98.6	-0.0500745	0.0180887	-0.00711144	0.0423525	-0.0451003	0.00444851	-0.04182	-0.0111119	-0.00701999	-0.00393784	0
98.8	-0.0146259	-0.0477828	-0.00631915	-0.0126396	-0.00809215	-0.00522126	-0.0179911	-0.00877332	0.0292404	-0.00247034	0
99	0.0241637	-0.0129057	0.0315845	-0.0374698	0.0277506	-0.0204444	-0.00801862	-0.0130498	0.0247044	-0.0140245	0
99.2	-0.00702343	0.0564098	0.0576315	-0.0317391	-0.0142916	-0.0228443	-0.0756345	-0.0136749	-0.038635	-0.0222169	0
99.4	-0.0103937	-0.0214487	-0.0823266	-0.0122528	0.005726	-0.0566424	-0.0203212	-0.0362215	-0.11685	-0.0757086	0
99.6	0.0320463	0.0193389	-0.0540607	0.00807113	-0.00129275	0.0147162	0.071694	-0.0407084	-0.021069	-0.00606825	0
99.8	0.0546812	-0.0195251	-0.0360433	-0.0187411	0.0239842	-0.0512289	-0.0173377	-0.0258757	-0.00116687	0.0163045	0
100	-0.018085	-0.0104731	-0.0766324	-0.0440997	-0.00429274	-0.0248351	-0.0419749	0.0635926	0.0244125	-0.00329407	0
100.2	-0.0536262	0.0132361	-0.0616331	-0.0329072	-0.0141587	0.00259627	0.0104788	0.0232101	0.0499328	0.00791756	0
100.4	-0.0148742	-0.0398808	-0.0178534	0.00446565	0.0206387	-0.024149	0.0355618	-0.0607398	-0.0086552	0.0238282	0
100.6	-0.014253	-0.0659219	0.00201841	0.0349244	0.023996	0.00853398	0.0206907	-0.0103345	-0.0534459	-0.00580979	0
100.8	-0.0344645	0.0016198	0.0384213	0.0382861	0.0160171	0.0129955	-0.0259142	-0.0186095	0.0228234	-0.0347377	0
101	-0.00643626	-0.00959285	-0.0453398	0.0372123	-0.00525584	0.017427	0.0110935	0.0224926	0.0203149	-0.0163819	0
101.2	-0.0130889	-0.00268295	0.0193296	-0.0112827	-0.0209572	0.00133593	-0.0050152	0.0326649	0.00272767	-0.041592	0
101.4	0.00277773	0.040071	0.0342441	0.0126863	-0.0120403	0.0311099	-0.0205484	0.0256741	-0.013099	-0.0221685	0
101.6	0.0262634	0.0419869	0.0270421	-0.00690779	-0.0141844	0.0213127	-0.0199715	0.0235936	-0.0335633	-0.00966417	0
101.8	0.00017346	0.0220647	0.0947036	-0.0673174	-0.0133082	-0.00205092	-0.00101288	-0.011748	-0.0194297	-0.0466459	0
102	-0.0171303	0.0388612	0.0940135	0.00798315	0.0188068	0.0513578	0.0523454	-0.0494283	0.0212255	-0.0299022	0
102.2	0.0304845	0.0235721	0.0281757	0.0496092	0.0138553	0.000226246	0.0321247	-0.00907536	0.015845	0.0111249	0
102.4	0.0262841	-0.0113031	-0.0504039	0.00431968	0.0230407	-0.0156458	-0.0158267	-0.0312576	0.0272773	-0.0123098	0
102.6	0.00046149	0.0118393	-0.0451694	-0.0648487	-0.00312978	0.0415116	0.0154717	0.0399437	-0.0086655	0.00438235	0
102.8	0.0519007	-0.0117612	0.0114044	-0.00501828	0.00826072	0.00600881	0.0396084	0.0187681	0.0421475	0.0209741	0
103	0.0510558	-0.0279225	0.00586239	0.00898249	0.0137087	-0.0345505	0.00412859	-0.050765	0.123254	0.0179419	0
103.2	-0.025883	0.0100961	-0.00703431	-0.0578546	-0.026962	-0.00243629	-0.0347239	0.00750323	0.0448184	0.0264602	0
103.4	-0.000285579	-0.0323004	0.0506754	0.0279731	-0.0168852	-0.0454061	-0.0396045	0.0341171	-0.0855467	0.016327	0
103.6	-0.0329502	-0.0507402	-0.021831	-0.0102109	-0.0214041	-0.0299794	-0.000174948	-0.027454	-0.0595299	-0.00465248	0
103.8	-0.0330434	-0.0283813	0.0139906	0.0459678	0.0131376	-0.00748759	0.0230621	-0.0389257	-0.0701193	-0.041869	0
104	-0.00686906	0.016642	-0.0542102	0.0554713	0.0357859	-0.0042557	0.00983942	0.0154156	-0.00619587	-0.0262317	0
104.2	0.00602349	0.00161729	-0.0747345	0.0183699	0.0138699	0.00244049	-0.0345691	0.0408102	0.0552506	0.00544418	0
104.4	-0.00109602	-0.0180869	0.0234745	0.0285122	-0.00628644	0.0269673	-0.00933156	0.00892699	0.00124104	0.00851154	0
104.6	0.0192346	0.0405703	0.0611499	0.0491601	-0.00588292	0.0621941	0.0982685	0.0267797	-0.0452743	-0.00819231	0
104.8	0.0800014	0.0515583	0.100482	0.0378449	-0.0155983	0.0894665	0.0993382	0.107933	0.00678768	-0.0291837	0
105	0.0229004	-0.00227323	0.0611086	-0.004597	0.0151631	0.0744174	0.0351275	0.00842465	0.00411206	0.0286643	0
105.2	0.0113058	0.0276371	0.0438014	-0.0125687	0.0185166	0.0226116	0.0281346	-0.000495737	-0.0417534	0.0468072	0
105.4	0.0156643	0.0330488	-0.084905	-0.0197391	-0.0286381	0.0049041	0.00156872	-0.04235	-0.0117573	0.0280724	0
105.6	-0.0130569	0.0166624	-0.103865	-0.0534601	-0.0556538	0.0232658	-0.0320364	-0.0493247	0.0244969	0.0278223	0
105.8	-0.0484637	0.0151588	0.010834	-0.0358478	-0.0198222	0.00817374	0.000495187	0.0329304	-0.000538988	0.0269467	0
106	-0.0551873	0.00990904	-0.0275461	0.0620222	0.0109358	-0.0394523	0.0281505	0.0048703	0.0123328	0.00663056	0
106.2	0.00215397	0.0758905	0.0175657	0.0871823	-0.0223389	-0.0305504	-0.0268126	-0.0265262	0.0526164	0.0187734	0
106.4	0.0202528	-0.034453	-0.000535928	0.0262562	-0.0144515	-0.00826504	-0.0303541	0.0127582	-0.0177723	0.0157394	0
106.6	-0.0337429	-0.014344	0.00400265	-0.00845501	-0.00691488	-0.0148599	-0.0264204	0.0162766	0.00734455	0.00477059	0
106.8	-0.012866	0.0267723	0.0236584	-0.0309423	-0.0140052	-0.0421075	-0.03551	-0.00347114	0.0245743	0.031667	0
107	-0.00627437	-0.0234262	0.019631	-0.0141435	-0.00677058	-0.032795	-0.0266575	-0.0072084	0.0358999	0.0564281	0
107.2	-0.0739884	-0.043788	-0.004101	-0.00666888	0.00428015	-0.00219568	-0.0134036	0.00474957	0.0718131	0.0142869	0
107.4	-0.0158853	-0.0301276	-0.029616	-0.102148	-0.00564385	-0.0271687	-0.0412816	0.0212017	-0.0231566	-0.0338839	0
107.6	0.0241986	-0.00816903	0.00661685	-0.0409493	-0.00806485	-0.0264641	-0.0694545	-0.0177366	-0.030471	0.0133147	0
107.8	0.0351967	-0.0523289	-0.0801462	-0.0266385	-0.0197483	0.045844	0.0185114	0.00286352	-0.0349276	0.0433537	0
108	-0.0173665	-0.0322592	-0.0680375	-0.0408449	0.0107419	0.0152532	0.0224217	0.0553265	0.000818816	0.021826	0
108.2	-0.0321445	0.00189624	-0.0227888	-0.00616081	0.0216002	-0.0476165	0.000410653	0.0473097	0.000663434	0.0247744	0
108.4	0.00445733	0.00760232	-0.0449013	0.0318401	-0.000276107	-0.0391204	0.0112858	-0.0254903	-0.029024	0.0146398	0
108.6	0.00176916	0.0016751	0.00870468	0.0166927	0.011903	-0.0270354	-0.0110301	-0.0826771	0.0074761	-0.0319384	0
108.8	0.0228823	-0.0684929	0.0962562	-0.00379646	0.0220786	-0.0189744	0.0268601	-0.0620718	0.0263691	0.0255821	0
109	0.0593732	0.03509	0.0348106	0.0208365	0.0385865	0.00887314	0.0174286	0.0116479	0.0470236	0.0493107	0
109.2	0.00213187	0.0187427	0.0170522	0.0231369	0.0415638	0.0283902	0.0286085	0.0128275	0.00262779	0.0509503	0
109.4	0.00176583	-0.0397754	0.037959	-0.00657167	0.026102	0.0578494	0.0107152	0.028504	-0.0156608	0.021062	0
109.6	0.0570476	0.00891265	0.00657943	-0.0209635	0.0117556	0.0355051	0.0186544	0.0437339	-0.000402663	-0.0282974	0
109.8	0.0258483	0.0370125	-0.0126529	0.0289404	0.00774559	-0.0199344	0.0255786	-0.00501156	-0.0187461	-0.0306729	0
110	-0.0418747	-0.0129258	0.0301656	0.0747392	0.0038151	0.000212574	-0.0621845	-0.0119014	-0.0120156	0.0112716	0
110.2	-0.0217765	0.0518584	-0.00381109	-0.0216229	-0.00731326	0.00282786	-0.0259922	0.0479407	0.0605868	-0.00473041	0
110.4	-0.0192907	-0.0256761	-0.0295826	-0.00960359	-0.030054	-0.0168353	-0.0232427	-0.0573755	-0.00900597	-0.034049	0
110.6	-0.0273277	-0.0444781	-0.0357614	-0.0106756	0.018753	-0.0686834	-0.0434007	-0.103741	-0.0258508	-0.0484619	0
110.8	-0.024854	0.0118488	-0.0417751	0.0176994	0.0210971	-0.0188593	-0.017998	0.00168373	-0.0167014	-0.0312926	0
111	-0.0252481	0.00453627	-0.0722318	0.0411976	-0.0171784	0.0526899	0.0291106	0.0347038	-0.0345328	-0.00598891	0
111.2	0.0075625	-0.0527973	-0.0503634	-0.019049	0.00127842	0.011894	0.0314871	-0.0320832	-0.0208663	-0.0113291	0
111.4	0.0712007	-0.0433095	0.0684896	-0.0173946	-0.00931233	-0.000762808	0.0103785	0.0132986	-0.0114694	-0.0330715	0
111.6	-0.00455568	0.046142	0.013475	-0.0012744	-0.0249413	0.00346746	0.0547132	-0.021909	0.00288887	-0.0326332	0
111.8	-0.00457537	0.00487824	0.030933	-0.0107833	0.0159727	-0.00696665	0.0451238	0.0399717	0.0125472	-0.0161538	0
112	-0.0345465	-0.00344956	-0.0374265	-0.0364191	0.00481327	0.00188183	-0.0137717	0.0228874	0.0407127	-0.000318394	0
112.2	-0.0499572	0.0406579	-0.00312751	-0.0305168	-0.0126123	0.0152841	-0.0322088	-0.0245517	0.0182154	0.0126992	0
112.4	-0.000669775	0.0518942	0.100253	-0.00678859	-0.00138886	-0.0104044	-0.00225912	0.0136472	-0.014827	0.00648294	0
112.6	0.00761329	0.0249078	0.000777386	-0.0383673	-0.0194315	-0.0508633	0.0061539	0.0231324	0.00431635	-0.0230997	0
112.8	0.0106855	-0.056665	0.0201586	-0.0796823	-0.0080171	-0.0448394	-0.0265339	-0.0142986	-0.046821	-0.0247829	0
113	-0.016074	-0.0211457	-0.0246025	0.027085	-0.0257199	-0.0204016	-0.0611113	-0.0129275	0.00117751	0.00341206	0
113.2	0.0146839	-0.0533377	-0.0251115	-0.00290326	-0.0022616	0.00137492	-0.079617	-0.00666929	0.00410347	-0.0107062	0
113.4	0.0164257	-0.00115063	-0.0182375	-0.0247224	0.0082095	-0.0164828	-0.0512089	-0.0288982	-3.38687e-05	-0.013645	0
113.6	-0.0404636	0.0511582	-0.0540509	0.022028	0.0180382	-0.0566635	-0.0334267	-0.049623	-0.000248654	-0.0187173	0
113.8	-0.0293311	-0.0418757	-0.0204678	0.0295101	0.0418765	-0.046054	-0.0293882	-0.0370181	-0.0483427	-0.0461296	0
114	0.0598315	-0.0348445	0.0768233	0.0349656	0.00392345	0.0257821	0.0364869	0.00794457	-0.0599391	-0.0383367	0
114.2	0.0494042	0.0975423	0.00650538	0.018515	-0.016662	0.0691533	0.0705	0.0612309	0.0136505	-0.0453651	0
114.4	0.051543	0.0424579	0.0195938	0.0890691	0.0202221	0.0882822	0.0903356	0.0134786	0.0153546	-0.0246551	0
114.6	0.0458428	0.00209126	0.0362033	0.0325712	-0.0204189	0.0610233	0.0706211	0.0131626	0.0130995	-0.0183678	0
114.8	0.0250629	0.0366205	-0.0103129	-0.0359732	-0.037193	0.0357908	0.0362573	0.0204104	0.0372343	-0.0406511	0
115	-0.0196233	0.0102016	-0.0131848	-0.0112382	-0.00371423	0.024672	0.0138194	-0.00906818	0.00284806	-0.0353019	0
115.2	-0.0492168	-0.0553581	0.0328245	0.0272725	-0.00574472	0.000589016	-0.00450376	0.000606309	-0.0563014	-0.00767401	0
115.4	0.00895148	-0.0144338	-0.0135115	0.0636608	0.0250716	-0.00799368	-0.0129733	0.0182018	-0.00375476	-0.014925	0
115.6	-0.0212368	0.0695014	-0.0504559	-0.0551152	0.0125569	-0.0119154	-0.0177625	-0.00570073	0.0238409	0.0265856	0
115.8	-0.0464744	-0.00662707	0.0318676	-0.0419987	-0.0321578	0.0321981	-0.0137502	0.006442	-0.0126666	-0.0132814	0
116	-0.00977008	-0.0364201	0.024444	0.0014276	-0.0113539	0.0326566	0.0493247	0.043156	0.039911	-0.0273462	0
116.2	0.013707	0.015594	0.00832153	-0.00784914	0.0180983	-0.00165383	0.0293171	0.0345217	0.0563598	-0.0116629	0
116.4	-0.00539915	0.00468962	0.0125313	-0.0019896	0.0203213	0.00177166	-0.029249	-0.0158728	0.00641372	-0.0163132	0
116.6	0.00259835	-0.0314199	-0.0841077	0.00670126	0.0365748	0.0138805	0.0397146	-0.0336045	0.0354958	-0.00508865	0
116.8	0.0396382	-0.00429795	-0.0196126	-0.00998409	-0.00224523	-0.00606357	0.0210841	0.00418168	-0.020144	-0.00714029	0
117	0.027533	-0.013146	0.0811552	0.0198674	0.00720307	0.00194422	0.0152549	0.0374619	-0.0265576	0.035217	0
117.2	0.0166105	0.0364108	0.0244072	0.0231124	-0.0177903	0.000502035	0.00145752	-0.00251188	0.00509161	0.00409699	0
117.4	0.0281877	0.039296	-0.00236389	0.00536897	-0.0143592	-0.00985906	-0.000922964	0.0144086	0.00178002	-0.0153158	0
117.6	0.0133527	-0.011177	0.00611089	0.010957	0.00432602	-0.0143671	-0.0203235	0.041876	-0.0304103	0.0157276	0
117.8	-0.0371751	-0.0285109	-0.017439	0.0150219	-0.00800994	-0.0119077	-0.0412583	-0.00275139	-0.0500041	0.0483057	0
118	-0.0502991	-0.0275197	0.0265545	-0.019406	0.00802234	-0.00424863	0.00833371	-0.0027938	-0.0485371	0.0740774	0
118.2	-0.00391593	0.0498923	-0.0515338	-0.0315235	-0.0222884	-0.0189647	-0.0142827	-0.0132934	-0.018207	0.00873548	0
118.4	-0.00972825	0.014825	-0.0192185	0.037847	-0.0179774	-0.0341512	-0.0349149	-0.0218433	0.00431631	0.0150122	0
118.6	-0.0466069	-0.0554531	-0.03593	-0.0205685	-0.0105652	-0.0385018	-0.052999	-0.0620043	0.0153388	0.0273168	0
118.8	-0.00982985	-0.0477158	-0.0286578	-0.0807242	-0.0215094	-0.0348038	-0.0482997	-0.0552656	0.00679744	0.0198911	0
119	0.0279988	-0.00402681	0.0536455	-0.0434384	-0.0219654	-0.00610522	-0.0125982	0.00272076	0.0138476	0.0233071	0
119.2	-0.0227027	0.0100572	0.0408546	-0.02899	-0.00515609	0.023572	0.00858723	0.021813	0.0337963	0.0305465	0
119.4	-0.0276438	0.00995555	-0.0273954	0.00112515	2.39654e-05	-0.0052557	-0.00759716	0.0208026	-0.00815149	0.0430656	0
119.6	-0.0105638	-0.0410819	-0.0263331	0.0278126	-0.0144198	-0.00732611	-0.0453118	-0.00746561	0.0021611	0.039443	0
119.8	-0.00837479	-0.0659246	-0.048212	-0.0337747	-0.00941077	-0.0259623	-0.0338914	-0.0352989	0.04302	0.0255899	0
120	-0.0137899	-0.031079	-0.033129	-0.0109479	-0.0123618	-0.050312	-0.0251133	-0.052644	0.032362	0.0789537	0
120.2	-0.0112546	0.0103396	0.00996178	0.0100409	0.00631962	-0.0584077	-0.0323343	-0.0366739	-0.0181011	0.104281	0
120.4	0.0021123	0.0143287	-0.00488494	-0.0382285	0.0253642	-0.0326708	-0.0164013	-0.0118193	-0.0565071	0.068303	0
120.6	0.0125931	-0.012346	-0.0272926	-0.0201927	-0.0147221	0.00734602	0.00409076	-0.0305793	-0.0631976	0.0921664	0
120.8	-0.0104892	-0.0464086	0.0364164	-0.0593329	-0.0018399	-0.0230509	-0.0224221	-0.0401612	-0.0246695	0.10014	0
121	-0.0577008	-0.0240138	0.0506222	-0.0135334	0.0265083	-0.0314181	-0.0875949	-0.00798585	-0.0140435	0.0774713	0
121.2	-0.0135694	-0.0631844	-0.0201994	0.0134815	-0.0112149	-0.0334796	-0.0535955	-0.0145372	-0.0624252	0.0778266	0
121.4	-0.0225827	-0.0566025	-0.13885	-0.0364418	-0.0265934	-0.0338548	-0.0508941	-0.0353485	-0.00751949	0.0745942	0
121.6	-0.0460374	-0.0270044	-0.102352	-0.0525172	0.000650172	-0.0394724	-0.101973	-0.0588844	0.0412296	0.0545088	0
121.8	0.0160206	-0.0617178	0.090191	-0.0249568	-0.00139801	-0.0463099	-0.0666348	-0.0752475	-0.00799537	0.0226273	0
122	-0.00335895	-0.0305068	0.113196	-0.0756088	-0.0091847	-0.0214993	-0.00770625	-0.0373729	0.0300974	-0.00536191	0
122.2	-0.0339171	0.0123015	0.0193855	-0.0798402	0.00126616	-0.00522341	-0.0472748	-0.038044	-0.0595438	0.0660805	0
122.4	-0.0443261	0.031854	-0.0970714	-0.00189221	0.00145403	0.00406725	-0.0464701	0.00685363	-0.0457834	0.0264202	0
122.6	-0.0157544	0.0158999	-0.0561526	-0.0384137	-0.00572788	-0.0572472	-0.0261144	-0.0404639	-0.0237597	0.0137559	0
122.8	-0.00412054	-0.0817572	0.0400206	-0.0945816	-0.0289806	-0.0778199	-0.04601	-0.0982972	-0.0902151	0.0328885	0
123	-0.0205514	-0.116471	-0.00906844	-0.0358608	-0.0444396	-0.0173567	-0.0418988	-0.033929	-0.0790811	0.0192323	1
123.2	-0.00242899	0.0178632	-0.0613505	0.0162085	-0.014839	0.0286617	0.0296041	0.0414646	0.0539922	0.0238242	1
123.4	0.0260788	0.0613778	0.113281	-0.0155738	0.00892872	0.0749455	0.0662085	0.0427616	0.0651911	0.0349326	1
123.6	-0.00547819	0.0413458	0.123926	-0.0199004	-0.0210802	0.039118	0.0767398	0.111684	0.0877095	0.0682403	1
123.8	0.0129272	0.096954	0.0872749	0.027613	0.0052874	0.0325884	0.0747317	0.0946627	0.0963414	0.071975	1
124	0.071623	0.127273	0.134008	0.112073	0.0310521	0.0576164	0.082733	0.0216682	0.0250051	0.0509039	1
124.2	0.0403461	0.0767055	0.11827	0.0918417	0.016117	0.0613602	0.0850872	0.00624285	-0.00765965	0.0442578	1
124.4	-0.0220041	0.0383261	0.0044249	-0.00745564	0.00976763	0.0690615	0.0933269	0.0400573	0.0422304	0.0634705	1
124.6	0.0222107	0.0316515	-0.0195424	0.0380682	0.0138172	0.0764349	0.100134	0.050768	0.0602092	0.0842273	1
124.8	-0.000219015	-0.0148016	-0.00153868	0.105916	-0.00468617	-0.00321896	0.0300618	0.0409003	0.0990245	0.0676503	1
125	-0.0241523	0.0120508	-0.0321282	-0.0186535	-0.00699581	0.0216891	0.135897	0.0701909	0.0667806	0.00295661	1
125.2	-0.00353571	0.0202195	-0.00669408	-0.0271218	0.0238973	0.0176476	0.0615633	0.0126095	0.0545288	0.0121741	1
125.4	-0.0253196	0.0211794	-0.0134058	0.00439382	0.0283273	-0.0189144	-0.0257589	-0.00667718	0.0176003	-0.0336102	1
125.6	-0.0586221	0.0361148	-0.0834054	0.021266	-0.0131448	0.00507412	0.0239215	0.0419496	-0.0326888	-0.100412	1
125.8	-0.0424635	0.0159348	-0.0486476	0.0717719	-0.02382	0.0579983	0.0255194	0.05295	-0.00518896	-0.0603981	1
126	-0.0482935	-0.00138907	0.0739184	-0.0115389	0.0253565	0.0623887	0.0279616	0.07482	0.0379981	-0.0418185	0
126.2	0.00291365	0.0498214	0.0210429	-0.0284562	0.0197772	0.0255291	0.0862084	0.040128	0.0502061	0.0169956	0
126.4	0.0166742	0.0514903	0.0703495	-0.0149088	0.020606	-0.0327739	0.082561	0.0443128	0.0409564	0.00245443	0
126.6	-0.0212311	0.0172966	0.00138417	-0.0191033	0.00111948	-0.00031305	0.0741389	0.043171	0.00923992	-0.00490495	0
126.8	-0.0398684	-0.00379689	-0.0428225	-0.0146071	-0.00623469	0.0340965	0.0630148	0.0294556	0.0320449	-0.028047	0
127	-0.0480794	-0.0231868	0.0108122	-0.00784167	-0.000881872	0.000459786	0.030614	0.0225886	0.0522997	-0.066499	0
127.2	-0.0672719	-0.023344	-0.0496153	-0.0289499	-0.0265896	-0.011583	0.0174281	0.0163317	-0.0195675	-0.0480717	0
127.4	-0.0176069	0.035839	0.0109917	-0.0421547	-0.00407818	-0.0106009	0.00483755	0.0331883	-0.0274024	-0.0684704	0
127.6	0.000312042	0.0161816	0.044263	-0.0444855	0.026463	0.01629	0.0259911	-0.00192571	-0.04746	-0.0531425	0
127.8	0.00930763	0.0282111	0.102463	0.0643526	0.0335583	0.044947	0.0641939	0.0519114	0.0209233	-0.0474402	0
128	0.0120659	0.0204238	0.0819923	0.0705239	0.0150394	-0.0220555	0.0235128	0.0579406	0.0313019	-0.0238246	0
128.2	0.0040442	-0.010944	-0.00651938	-0.0288183	0.0071932	-0.062656	0.00205173	-0.0339057	-0.0103325	0.00833648	0
128.4	0.0131265	0.00813439	-0.0396865	-0.0498083	0.0112237	0.00237945	0.0487783	-0.0126659	-0.00033445	-0.00295338	0
128.6	0.0297812	0.0533014	-0.0337191	-0.0197758	0.000701693	0.0227953	0.0266883	0.112664	-0.00914414	-0.0167063	0
128.8	-0.00970538	0.0764917	-0.0293096	0.0245689	0.0161613	0.0372548	0.0306384	0.00540422	0.0137541	0.0211142	0
129	-0.0397808	-0.0544635	-0.0830079	0.0428738	-0.0219664	-0.0427295	-0.010963	-0.0165141	0.0384633	0.00556388	0
129.2	-0.0257369	-0.0489947	-0.0780393	-0.0139256	-0.0249398	-0.0187367	0.0113503	0.0600543	0.0415103	-0.0216402	0
129.4	-0.00613227	0.0128842	0.0216107	-0.0031532	0.000758495	0.0297392	0.0382372	0.0250887	0.0157683	-0.00318907	0
129.6	0.00943168	-0.0218822	0.100317	0.0566152	-0.0113752	-0.012779	0.0296816	-0.0295432	-0.00136252	0.00208736	0
129.8	0.0106486	-0.0293851	0.0730456	0.0163462	-0.0157885	-0.014445	0.0431345	0.0481921	0.0126841	-0.0130261	0
130	-0.0194831	0.025393	0.0186944	-0.0200809	0.0370903	0.0548181	0.0199245	0.0650962	0.001874	0.0265975	0
130.2	0.045568	0.018945	0.0355131	0.00473148	0.0172122	-0.0143902	-0.0194055	0.0316187	-0.0253779	-0.0264725	0
130.4	0.017004	0.0268001	0.0011041	-0.0603853	-0.00873717	-0.0344294	-0.0100164	0.0127837	0.0561054	0.0185427	0
130.6	-0.0145896	-0.0144285	-0.038059	-0.0746855	0.000419384	0.018917	0.0222376	-0.040496	0.0615515	0.00646924	0
130.8	0.00397037	-0.0300147	0.0071891	0.0301989	0.0152333	0.0238473	0.0108765	-0.0650365	-0.0292786	-0.0325906	0
131	0.013666	0.0121046	0.0532477	0.0907772	0.00854082	0.00598952	-0.0115791	0.0218682	-0.0305597	-0.00221732	0
131.2	0.0091537	-0.00119728	-0.022702	0.0202983	-0.00910749	0.0372049	-0.000636115	0.0753815	0.0230334	-0.00730319	0
131.4	-0.0125443	0.00317243	-0.107831	-0.0288836	-0.00309499	0.000970467	-0.0282738	-0.0419506	-0.0497991	-0.00923021	0
131.6	-0.00772029	0.00221237	-0.0220941	0.0252709	0.0446455	-0.0231541	0.00354461	0.0085886	0.00506318	-0.00652662	0
131.8	-0.0185387	0.00659092	0.0846951	0.111837	0.0193889	0.0258594	-0.00188852	0.0171578	0.0169545	-0.00135199	0
132	-0.020845	0.0289143	0.0728408	0.0517987	-0.0101467	0.0281775	-0.00566105	-0.0201689	-0.0057857	-0.0174734	0
132.2	0.00732689	0.0394619	0.0366367	-0.0658539	-0.0123313	-0.0243942	0.0066293	-0.0215258	-0.0247888	-0.0323154	0
132.4	0.0153574	0.0133803	0.024777	-0.0301118	-0.0270511	-0.00447256	0.0115539	-0.0188641	-0.0518979	-0.0305409	0
132.6	-0.026804	-0.00500765	-0.0339497	0.0644233	-0.0234921	0.0507723	0.0299016	-0.0201866	-0.00478049	-0.0400954	0
132.8	-0.0416856	0.0323851	0.0117845	-0.000784114	-0.0245374	-0.0153776	-0.0349705	-0.0400098	0.0369994	-0.00570428	0
133	0.0223846	0.0193098	-0.0205677	-0.0953478	0.0365672	-0.00808184	-0.0130509	3.9941e-05	-0.0667925	0.0585885	0
133.2	0.0481376	-0.0258216	-0.0498237	-0.0491738	0.0194504	0.0117242	0.0506067	-0.0252742	0.0195405	-0.0133135	0
133.4	0.0599635	-0.0239425	0.0300517	0.0220189	-0.0022819	-0.0151101	0.0127872	0.0305398	0.0792039	-0.0217763	0
133.6	0.0580939	0.00391012	0.0262852	-0.00646472	0.0149394	-0.0325718	-0.0351174	0.0565131	-0.0293298	0.0331648	0
133.8	-0.00327649	0.00439428	-0.0752596	-0.0185332	-0.0182974	-0.0072065	0.0159055	-0.0748811	-0.0345802	-0.0311721	0
134	-0.0136063	0.00160589	0.0532231	0.0429904	-0.0172898	0.0259105	0.00962025	0.0242041	-0.0107692	-0.00119457	0
134.2	-0.00531892	-0.0372191	0.00412285	-0.0713637	0.0133038	0.0252353	0.00731144	-0.0146362	-0.0169309	-0.00614935	0
134.4	0.0129565	-0.00952474	-0.0192132	-0.0773507	-0.00299327	-0.00833235	-0.00850473	0.0690914	-0.00168077	0.0327061	0
134.6	0.00745452	0.026499	0.00239788	0.0306604	-0.0139573	-0.0375253	-0.0186197	0.0172332	0.00139794	0.0417206	0
134.8	-0.00277936	0.00841497	-0.0233137	0.0453942	0.00017327	-0.0104214	-0.0425138	-0.0494967	0.0176054	0.027906	0
135	0.0145404	0.0216541	-0.017113	0.0138263	0.00715784	0.0374116	-0.0151382	0.0303316	0.0258526	0.0441688	0
135.2	0.0165947	0.0602034	0.0772156	0.0753769	0.0104183	0.0233327	0.0614012	-0.0166047	-0.027546	0.0335274	0
135.4	-0.0162603	-0.0542953	0.0838687	0.0457634	0.00878631	-0.00468771	-0.0713744	-0.00738565	0.00175129	0.0129112	0
135.6	0.0346318	-0.0198845	0.00399919	0.00390875	0.00907912	-0.00646964	-0.0362448	0.00290988	0.0198118	0.0193578	0
135.8	0.00674222	0.0075289	0.0124784	0.0322591	-0.00637656	-0.0398264	-0.0426299	-0.056319	0.0425164	-0.00127146	0
136	-0.0125656	0.0167208	-0.00754205	0.0443663	-0.0215752	-0.0199028	-0.0335112	-0.00590836	0.0255213	-0.0243176	0
136.2	-0.00580206	0.0238937	-0.0225849	0.0390499	-0.010775	0.0233325	0.0281789	0.0186798	-0.014769	0.0162826	0
136.4	-0.0400994	-0.0198139	0.0455934	0.0428663	-0.0113339	0.000797942	0.0412414	-0.0867766	-0.00144252	0.0370748	0
136.6	-0.0107288	-0.033131	-0.0038705	-0.0149375	-0.0340141	-0.00307101	0.0685674	-0.010123	0.0108311	-0.0486364	0
136.8	-0.0198605	-0.0172165	-0.0461411	-0.0222251	0.0491818	-0.00606753	0.00183368	0.014846	-0.040137	-4.6911e-05	0
137	-0.0341986	-0.0124969	-0.0288361	-0.0542291	0.0471391	-0.0126904	0.00597667	-0.0177018	0.0223024	0.0538981	0
137.2	-0.00351238	-0.00586052	-0.066711	-0.0604277	-0.0235838	-0.00579594	0.053091	0.00429841	-0.0151549	0.0112623	0
137.4	0.0160184	0.0258616	0.0166419	-0.0372028	-0.0386911	0.00805709	0.0315927	0.0521644	-0.0827743	-0.0130349	0
137.6	-0.00293247	0.00319028	0.0586359	-0.0401774	-0.00602668	0.0145328	-0.0281918	0.0490441	-0.00573691	0.0170505	0
137.8	-0.0190312	-0.0556211	-0.103868	-0.0519822	-0.000685536	0.00675828	-0.0369827	0.0139028	0.0540043	0.0159451	0
138	-0.0302407	0.0317922	0.048838	-0.0335451	0.00424432	-0.0172068	-0.0378565	0.00147619	-0.0280968	0.0214802	0
138.2	0.00226876	0.0154707	-0.0401811	-0.0502329	0.0195911	-0.0277806	-0.0739317	0.0183955	-0.00019158	-0.00209344	0
138.4	-0.0266208	0.00307212	-0.0593049	-0.0708074	0.00707588	-0.0665687	-0.030567	-0.00464429	0.000374195	-0.0434987	0
138.6	-0.0518528	-0.0422836	-0.0147166	-0.0265593	0.0134848	-0.0559218	-0.00698008	-0.0711099	-0.0159877	-0.0205051	0
138.8	-0.0150841	-0.0534069	-0.0687609	-0.00552463	0.0114904	0.00117739	-0.0440958	-0.0451187	0.0192219	0.00912213	0
139	0.00437483	-0.0188173	-0.0495024	-0.0108197	-0.029736	0.00656236	-0.0382634	0.00953076	0.0249517	-0.0204779	0
139.2	-0.0258527	-0.0617285	0.107971	0.045085	-0.03378	-0.034545	0.00362882	-0.0790993	-0.0329416	-0.038802	0
139.4	-0.00990211	0.0165747	0.00927502	-0.014539	0.00309514	-0.0290938	-0.0222085	-0.053877	0.0029728	-0.0487525	0
139.6	-0.0284502	0.0111835	-0.0474171	0.0302414	0.0332694	0.00702181	0.000306422	0.00295131	0.0159463	-0.0455525	0
139.8	0.0268192	-0.0220259	-0.0229896	0.0833115	0.0529478	-0.00887687	0.00637289	-0.0225434	-0.00871052	0.0151169	0
140	0.0155343	0.00645264	-0.0213838	0.0615228	0.0180968	0.00248232	8.80853e-05	-0.0280283	-0.0202717	0.0120898	0
140.2	-0.0276411	0.0352887	-0.01142	0.00510986	-0.0161596	0.019591	0.00181134	0.0277723	-0.0410322	-0.0488496	0
140.4	0.0412608	0.0135098	0.0481886	-0.0186661	0.00968267	-0.0150397	-0.0207332	0.0313831	-0.0332492	-0.0458228	0
140.6	0.0370938	0.00511645	0.0343252	0.00678063	-0.00240333	0.0208786	-0.0336185	-0.0314224	0.0485137	-0.0343429	0
140.8	0.0127309	0.00764039	-0.0736776	-0.0240077	-0.0325176	0.041598	0.00783084	-0.0354046	-0.0664173	-0.0326598	0
141	0.0233599	0.0118327	0.0390967	0.000106224	-0.03933	0.012778	0.0194569	0.0614273	-0.0282496	-0.00786042	0
141.2	0.0134015	0.0195369	0.0550396	-0.0204995	-0.0276571	-0.0170531	0.0215765	0.0265883	-0.00172651	-0.0428317	0
141.4	0.00729059	0.0136464	-0.0418403	-0.0453093	-0.0169202	-0.026901	-0.00268604	-0.0127422	-0.0647043	-0.0466794	0
141.6	-0.00702829	-0.015064	-0.0642913	0.00725607	0.0115917	-0.0226166	-0.0177561	3.56733e-05	-0.0293694	0.00279353	0
141.8	-0.0446768	-0.0365206	-0.0396812	0.0334928	0.0472741	-0.0159675	0.0148854	-0.0831931	0.0570877	0.00464301	0
142	0.00214507	-0.0316506	0.0621024	-0.0089512	0.0158937	-0.0294704	-0.0296848	-0.0203111	-0.00577029	0.0584686	0
142.2	-0.0861249	-0.0469693	-0.0231735	-0.00252734	0.00195007	-0.00515574	-0.000605314	0.044259	0.0332322	0.0311556	0
142.4	0.0125924	-0.0274782	-0.0657869	0.054985	-0.0104758	0.0600929	0.0409575	0.072902	0.0075002	-0.0239247	0
142.6	0.0771969	0.00689476	0.080672	0.0239982	-0.0126733	0.061888	0.0175902	0.0573803	0.0494363	-0.0301061	0
142.8	0.0217385	0.0243959	0.0729897	-0.0210433	0.00186045	0.0471818	0.0150653	0.0331741	0.0976395	-0.000731981	0
143	0.0192632	0.00614483	-0.0727018	0.0247167	0.0125296	0.0659593	0.0349721	0.0260285	0.0192885	-0.00360601	0
143.2	-0.0122778	-0.0323019	0.0722516	0.0390453	0.00304131	0.0185503	-0.00582417	0.00634739	-0.00374856	-0.0402657	0
143.4	-0.0253983	0.0200681	0.0452803	0.014288	-0.0330322	-0.0173586	0.0655863	0.00442303	-0.0489877	-0.0153315	0
143.6	0.0178409	0.0285441	-0.0218671	-0.0328925	-0.0177876	-0.00283574	0.0228682	-0.012527	-0.0468341	-0.0255883	0
143.8	0.0416543	0.0675889	-0.0513976	-0.0390075	0.00529355	0.000379199	-0.00119269	-0.0678989	-0.0159311	-0.0248469	0
144	0.00240675	0.0863664	0.0102276	0.0114756	-0.0107733	-0.00654105	-0.0338461	-0.0510623	0.0023538	0.0120214	0
144.2	-0.00199124	0.0518468	0.0536082	0.0370184	-0.0229989	-0.0118851	-0.0227431	-0.035053	-0.00265135	0.0370887	0
144.4	0.0401943	0.0398948	-0.0166364	-0.00448836	-0.0019298	-0.0164816	0.0882359	-0.0671188	-0.00287324	0.0162621	0
144.6	-0.0192512	0.0178267	0.0136599	-0.0217109	0.00254579	0.0161226	0.0302094	0.0656492	0.0267963	-0.00822564	0
144.8	-0.0201076	-0.00558232	0.121808	0.00651241	0.0080179	0.0336161	-0.00501047	0.0710589	0.0147502	0.0586346	0
145	0.0197831	0.0323099	0.0522519	0.0216319	-0.0267752	-0.00689347	-0.0227914	0.0315101	0.02654	0.0663691	0
145.2	0.0158282	-0.0113595	0.0053055	0.0461064	-0.0213542	-0.0243392	-0.0277584	0.00775397	-0.00920019	0.0489167	0
145.4	-0.0174505	-0.0668755	-0.0191268	0.0497689	0.00603167	-0.0152136	-0.0550018	0.0172528	0.0251436	0.0766414	0
145.6	-0.0316209	-0.0600125	-0.0706914	-0.0195069	-0.00142038	-0.0308905	-0.0501449	0.0408981	0.069011	0.0795449	0
145.8	-0.0264857	-0.0567567	-0.0236805	-0.0684266	0.00827646	-0.0302558	0.0543344	0.0328824	-0.048809	0.0255593	0
146	-0.0028855	0.0347801	-0.0369042	0.0221052	0.0392529	0.0307823	0.0607242	0.032667	0.0146129	0.037738	0
146.2	0.0183623	-0.0596352	-0.00849182	0.0269425	0.0111957	0.0420438	-0.0198714	0.0237965	0.0105266	0.0217486	0
146.4	0.0356439	-0.0643708	-0.0061305	-0.0870235	0.00801604	0.0210193	0.0257363	-0.0302364	-0.0325627	0.0316983	0
146.6	0.0290116	-0.00667892	-0.0578091	-0.0354582	0.0176293	0.0102145	0.0674627	-0.00765796	0.0155832	0.00226015	0
146.8	0.0132561	0.0408906	0.00245946	0.0314157	-0.00322465	0.0232084	0.0274356	0.0454179	0.0481061	-0.0330255	0
147	-0.00428289	0.0637279	0.125111	-0.0151547	-0.0104494	0.0298267	0.0099087	-0.000703332	0.0157362	-0.00236128	0
147.2	-0.0279507	-0.0234609	0.0297256	0.0845088	0.0203325	-0.00678172	0.000342967	-0.0496544	0.0574951	-0.0107724	0
147.4	0.0199841	0.0284867	-0.0457595	-0.0655574	0.00914888	-0.0321852	-0.0209627	-0.0375594	0.00500823	-0.0334157	0
147.6	-0.00915666	0.0236864	-0.0140064	-0.023878	0.00547232	-0.0319574	-0.0595118	-0.00878174	-0.0133324	0.00540688	0
147.8	-0.00301134	-0.00154138	0.0377066	0.0369847	0.00206429	-0.0288673	-0.0164462	0.0331528	-0.0457652	0.0293319	0
148	0.00844214	-0.0076303	0.0501495	-0.0151615	-0.0269968	-0.0405708	0.000442456	0.00173933	-0.0352547	0.0286072	0
148.2	-0.014124	-0.0222666	-0.0115023	-0.00948313	-0.0196987	-0.0397338	-0.0538155	-0.0136161	-0.000706463	0.0147064	0
148.4	-0.00867883	-0.0331952	-0.085901	0.0496356	0.0329537	0.00159879	-0.0337903	0.0450235	-0.0239006	-0.0195438	0
148.6	-0.0279837	-0.0253251	-0.0186808	-0.0188409	0.00203798	0.036162	0.0298581	-0.049974	0.00967103	-0.0155176	0
148.8	-0.00424045	0.0123749	0.0200155	-0.0398617	-0.0169751	0.00891572	0.00146594	0.00887614	-0.0426552	-0.0102749	0
149	-0.0418916	-0.018128	-0.0186501	-0.0882102	-0.000610664	-0.00997087	0.0263033	0.000404936	0.00254231	0.00196125	0
149.2	-0.0361683	-0.0628863	-0.0701824	-0.0889554	-0.00159558	0.0135597	-0.0193055	-0.0208866	0.0231082	0.0105177	0
149.4	0.0189006	-0.051983	-0.0920553	0.0122034	-0.0289091	0.0166634	-0.0426144	-0.0163356	-0.0150191	0.0104185	0
149.6	0.0124663	-0.0259228	-0.0586715	0.0574912	-0.0138522	-0.014009	-0.0022529	-0.0332149	0.00582679	0.0116581	0
149.8	-0.0258613	-0.0105802	0.000782361	-0.00616041	0.0411674	-0.00401904	-0.0474338	0.00542839	0.0400559	-0.00773753	0
150	-0.0180179	0.0467656	-0.0148008	0.057295	0.0078306	0.026869	0.0679731	0.0555099	0.0164925	-0.0713285	0
150.2	0.0127357	0.0206258	0.0638626	0.027764	0.00831085	0.00592906	-0.00787029	0.000139922	-0.00717261	-0.0629808	0
150.4	0.0183007	0.00736272	0.00905877	-0.0173028	0.0149396	-0.0279321	-0.0075597	-0.0188884	-0.0246242	-0.0308695	0
150.6	0.0170417	0.0254731	-0.0393602	0.0379655	-0.00339544	-0.0247636	0.0118681	-0.00356156	-0.00951868	-0.0548246	0
150.8	0.0204955	0.0414759	0.0740694	0.0413886	-0.0237866	-0.0230784	-0.0253158	-0.0325007	-0.00243809	-0.0607148	0
151	0.0272301	0.0578798	0.116705	-0.0111236	-0.0182881	-0.0189812	0.0101054	-0.0389774	-0.0334286	-0.0148115	0
151.2	0.0413139	0.0470521	-0.0167099	0.0980889	0.00925306	0.0522293	0.0351974	0.0254033	-0.0131105	-0.020608	0
151.4	0.00466444	0.00892823	0.0120093	0.0225875	0.00396744	0.0522737	0.023252	-0.00991622	0.0300203	0.0257857	0
151.6	0.0196832	0.0265128	-0.0314815	-0.058104	-0.0066832	0.0179847	0.0652659	0.00758902	0.0113733	0.0141768	0
151.8	-0.0220535	0.0367806	-0.00953786	-0.0455268	-0.0184085	0.025186	0.00705772	-0.0096069	0.0315412	-0.00145171	0
152	-0.0525298	-0.028669	0.0392252	0.00734793	0.0193976	0.0089148	-0.0363554	-0.01834	-0.0154455	0.0129891	0
152.2	-0.0160787	-0.0663873	0.0114315	0.0324702	0.0637544	-0.0390764	-0.0115282	-0.0016447	-0.0664549	-0.00492919	0
152.4	-0.0168316	0.00714999	0.000937526	0.00763219	0.0156311	-0.0406274	-0.0663118	-0.0226165	0.048065	-0.0336048	0
152.6	-0.0137913	0.0460225	-0.0195085	-0.0333397	-0.0290069	-0.040201	-0.0523287	0.0489373	0.0251001	0.0118816	0
152.8	-0.0318546	0.0410751	-0.00458139	-0.0599587	0.000183567	-0.00410787	-0.00112338	0.00311939	-0.0519612	-0.0118201	0
153	0.0236393	-0.0390697	0.0079695	-0.0287329	0.0122886	-0.00737523	-0.000329913	-0.0129756	0.00795674	-0.0100698	0
153.2	0.036783	-0.0334901	-0.0116859	-0.0190453	0.00741718	-0.00202965	-0.00141436	-0.0249104	0.0279095	0.00903308	0
153.4	-0.0132714	-0.025034	-0.0146167	0.00098914	-0.000408444	0.00511748	0.0221289	-0.0532394	-0.00212117	-0.00881942	0
153.6	-0.0185068	-0.0658025	0.0315269	0.020036	-0.0106246	-0.00885382	0.0346549	0.00696741	0.0105744	-0.0413664	0
153.8	-0.00995	0.0158239	0.036312	-0.0458066	-0.00872072	0.0092133	0.0173528	0.0910759	-0.0263135	-0.0481306	0
154	-0.041074	-0.00307263	-0.0509621	0.00898859	-0.0299156	-0.00751399	-0.0414639	-0.00848458	-0.0313736	-0.0294666	0
154.2	0.0146357	-0.00740953	0.0382036	-0.0129173	0.00380687	-0.021991	-0.0392427	-0.043427	-0.076413	-0.0233299	0
154.4	0.0233288	-0.00298233	0.0323876	-0.0391287	0.0227149	-0.010416	0.00305579	-0.015698	-0.00579134	-0.0155188	0
154.6	0.0236776	-0.0247293	-0.101257	-0.0153701	0.00323813	0.000180715	-0.00180734	0.0113214	0.031682	-0.0381296	0
154.8	0.043252	-0.0181893	-0.091971	0.0162282	-0.0141287	0.003186	-0.0226363	-0.0152334	-0.00602627	-0.0463452	0
155	-0.00529235	0.0115786	0.0104238	0.00993927	-0.00406906	0.0116229	-0.0157147	-0.0775982	0.00530642	-0.00588896	0
155.2	-0.0509329	-0.020162	-0.0567882	-0.016502	0.0202602	0.00916007	-0.0377835	-0.0616005	-0.0563146	-0.021114	0
155.4	-0.0171016	0.0101789	0.0200771	0.0703416	-0.00436776	-0.00373568	0.00529462	-0.0483035	-0.0828874	-0.0207565	0
155.6	0.0297534	0.0403013	0.0216129	-0.0266355	8.65492e-05	-0.0329459	0.0250319	-0.00726436	-0.0258311	-0.00955595	0
155.8	0.00871476	0.0158867	-0.0470769	-0.0323879	-0.00865541	-0.0486632	-0.0212334	-0.00498693	0.00873441	-0.0112445	0
156	-0.0171918	-0.0504158	-0.0636296	0.0456575	0.00025893	-0.0621754	-0.0316603	0.0233997	-0.0270396	-0.0344926	0
156.2	-0.0175614	-0.086501	-0.0117642	0.0539135	0.0260569	-0.0391494	-0.0124779	0.0450144	-0.0334379	-0.0193611	0
156.4	-0.0529929	-0.0457602	0.0298634	0.0743459	0.00166464	0.0210312	-0.0466649	-0.0272143	0.0347656	0.0435201	0
156.6	-0.0579046	-0.000246022	-0.00667131	-0.00538409	0.0134699	-0.0252199	-0.0198638	0.042238	0.0505571	0.0267257	0
156.8	0.00182911	0.0149002	0.038543	-0.0151656	-0.00332367	0.0107556	0.00497573	0.0711207	0.0536618	0.0518768	0
157	0.0316629	0.0225431	0.0641688	-0.016523	-0.0140479	0.0407725	0.027137	-0.040886	0.0269957	-0.000744707	0
157.2	0.0338102	0.0288618	0.00397143	0.0161981	-0.0295195	0.0318598	0.0546479	-0.0541778	0.00151442	0.0122093	0
157.4	0.0395611	0.0478032	0.0130015	0.0573763	-0.00843499	0.037837	0.0231762	0.0274506	0.0255248	0.060411	0
157.6	0.0305071	0.0402537	0.0884232	0.0107374	0.0247521	0.0274029	-0.0156101	0.0204902	0.0347301	0.0136495	0
157.8	0.013256	-0.00158225	0.0182028	-0.0493616	-0.0320011	-0.0217345	0.0363378	0.0044743	-0.0257349	0.000634931	0
158	0.026723	0.0836195	-0.0125604	0.00107326	-0.0121987	0.0304567	-0.0225346	0.0254302	0.00618502	-0.0229121	0
158.2	0.00308342	-0.0116516	0.044172	-0.0294054	0.00521203	0.0421602	0.0214501	0.00292041	0.0209034	-0.000151651	0
158.4	0.0446464	-0.0718069	0.0544092	-0.0502351	0.000269438	0.0331806	0.0504308	0.023826	-0.000315537	0.0253775	0
158.6	0.0663659	0.0039448	0.0324818	0.0128887	-0.0219109	0.0391007	0.0109388	0.0593267	-0.00765035	0.00704681	0
158.8	0.00305941	0.0490313	0.0167708	0.0537963	-0.0171383	0.0194679	0.00531248	0.0414035	-0.000625592	-0.00641399	0
159	-0.0338891	0.0212036	-0.0167694	0.00501747	0.0208674	-0.00282009	0.0578559	0.0142992	0.0177429	0.0253955	0
159.2	-0.016033	0.0383731	-0.0195174	-0.0346552	8.32677e-06	0.0356476	0.0792769	0.0237377	0.0649953	0.0356713	0
159.4	0.0370317	0.0674518	-0.00981769	-0.0161262	-0.00296413	0.00131698	-0.00198161	0.0556044	0.0381799	0.00840387	0
159.6	0.0572155	0.016257	0.0198645	0.0244521	-0.0130077	0.0215384	-0.0128852	0.0122978	-0.0045015	0.014426	0
159.8	0.00776338	-0.00683765	0.00273534	0.033875	0.00831749	0.0253788	-0.0130142	-0.0451723	-0.0165833	0.0396427	0
160	-0.0301054	-0.0141618	0.0113159	0.00606342	0.0308587	-0.0224711	-0.0358119	-0.0221295	-0.024361	0.0197086	0
160.2	-0.0126965	-0.0318027	0.0291866	-0.0170322	0.0215888	-0.0466989	-0.0438538	0.0361553	0.00964162	0.0160572	0
160.4	-0.00717299	0.00299058	-0.0396662	-0.00657703	0.0155187	-0.0500069	-0.0311928	0.0211891	0.0501684	0.0727612	0
160.6	-0.0163987	-0.032751	-0.00150427	0.00945113	-0.0201324	-0.0695267	0.050724	-0.035415	-0.105312	0.0141521	0
160.8	-0.0380212	-0.0625973	-0.0553148	0.0101323	-0.0232571	-0.0555682	0.0240752	-0.0203872	-0.0656906	0.0146103	0
161	-0.044569	0.00950257	-0.0594617	0.0120338	-0.0154446	-0.00720364	-0.0356487	0.00184759	0.018649	0.0519887	0
161.2	-0.0480022	-0.012017	-0.0486545	0.00434885	0.0111345	0.0221382	-0.0297374	-0.017526	0.0319744	0.0285486	0
161.4	-0.0353102	-0.0775518	-0.0249713	-0.0359718	0.0427251	0.0202698	0.0155226	-0.0183405	0.0248701	-0.0120706	0
161.6	-0.022159	-0.0161111	0.00697856	-0.0594788	0.0316785	0.0118121	0.0240282	-0.000620417	0.0129409	-0.00953285	0
161.8	-0.053442	0.00354432	-0.0705918	-0.0153981	-0.00648369	-0.00234648	-0.0081044	-0.0407638	-0.00918149	-0.012585	0
162	-0.00610656	-0.008046	0.00165172	-0.0193623	-0.0162315	-0.0111581	-0.00517302	-0.0294102	-0.00270676	0.0105638	0
162.2	0.0598583	0.0499466	-0.0465602	-0.014668	-0.0146667	-0.00430813	-0.0114475	0.016348	0.0408248	0.0322934	0
162.4	0.0659237	0.0442062	0.0357375	0.0150344	-0.0291492	0.00474315	0.000478385	0.0594956	0.0309505	0.00605852	0
162.6	0.0184109	0.0150376	0.064663	0.00770518	-0.0228675	0.0284709	0.0268503	0.0356721	0.00542111	-0.0491471	0
162.8	-0.00557348	0.00904713	-0.048227	0.00756648	0.0102752	0.0354481	0.0316655	-0.0264914	-0.00590037	-0.0584653	0
163	0.0132737	-0.0290443	-0.00381733	0.0379759	0.0299115	0.000701635	0.0215116	-0.0205176	-0.0308246	-0.0273636	0
163.2	0.00231229	-0.00286795	0.0298697	-0.0304732	0.0357763	0.0130006	0.0134311	0.0342049	0.00424561	-0.0404539	0
163.4	0.0196587	0.0203377	0.0699118	-0.0116489	-0.00508208	0.0406695	-0.00877912	0.0486173	0.0361719	0.00133944	0
163.6	0.03125	-0.0115033	0.0109171	-0.107086	0.000717993	-0.0280047	-0.0069069	-0.00241008	0.0162723	-0.00247482	0
163.8	0.0371026	-0.0206764	-0.0141028	-0.0594054	0.0198177	-0.0502342	-0.0394998	-0.0611015	-0.0159449	-0.0381028	0
164	-0.00759346	-0.0095626	-0.00847986	0.0550198	-0.00565697	-0.014834	-0.0381119	-0.0606342	-0.0278182	-0.0296745	0
164.2	-0.0761937	-0.0418016	-0.00995545	0.0377241	-0.0422356	-0.013382	-0.009433	-0.0274198	-0.0254593	-0.00676739	0
164.4	-0.0522447	-0.0645199	0.0389714	0.0488754	-0.0333093	-0.0150414	-0.0868848	-0.0370556	-0.0150322	-0.0379257	0
164.6	-0.0164954	-0.00751215	-0.0373392	-0.0575661	0.0132645	-0.0439699	-0.0777849	-0.0476539	-0.0106465	-0.0644104	0
164.8	-0.0147958	0.000301885	0.0279986	-0.0175729	0.0340981	0.0128142	0.000747328	0.00445176	-0.0343439	-0.0197269	0
165	-0.0080664	0.0266414	0.0023497	0.0749401	-0.00862711	0.0521908	0.0214103	0.000446732	-0.0325721	-0.0374906	0
165.2	0.0139559	0.0381575	-0.0386112	0.118249	-0.0141696	0.0283894	-0.00130571	-0.000878975	-0.0223663	-0.0339766	0
165.4	-0.00793726	-0.00317175	-0.0575558	0.031942	0.00474975	-0.0270489	-0.0226727	0.0136752	0.0071052	0.0156648	0
165.6	-0.0357796	-0.00417221	-0.0964377	-0.0732809	-0.0221893	-0.0623943	-0.00352233	-0.0178279	0.0461627	-0.00411307	0
165.8	0.0245799	0.0370799	0.0351799	0.0391676	-0.00395646	-0.024582	0.0778413	-0.00986048	0.0161669	-0.0361275	0
166	-0.0100487	-0.0419375	0.032433	-0.0181285	0.0279557	0.00492277	0.0351892	0.00861619	0.0365156	-0.0211723	0
166.2	0.0238763	0.00159209	0.0352712	-0.0211058	0.0255409	0.042193	0.0434176	0.0543505	-0.0144445	0.00305576	0
166.4	0.0684606	0.05222	-0.00892038	0.0313915	0.0207525	0.0475238	0.00836573	0.0273962	-0.0235248	-0.00074725	0
166.6	0.0258446	0.034533	-0.0418471	0.0633891	-0.0202484	0.0375495	-0.00598944	-0.0214829	0.00984963	0.000274168	0
166.8	-0.035433	-0.000344676	0.0318261	0.027028	-0.0369929	0.0109615	0.020728	-0.0153443	0.0220304	0.0275539	0
167	-0.0301158	-0.0355748	0.0554705	-0.0721947	0.0304815	-0.0332124	-0.0332747	0.00692824	0.0260749	0.0284218	0
167.2	0.00440168	0.00290476	-0.0329216	-0.0522034	-0.00768177	0.0159843	0.00498787	0.0463832	-0.0154299	-0.013578	0
167.4	0.0490988	0.0563066	0.124467	0.0473741	-0.00893366	0.0301043	0.0463452	0.0238272	0.0556511	0.00917817	0
167.6	-0.0156577	0.027984	0.0721733	0.0524845	-0.0020498	0.0164476	0.0113587	0.0291526	0.0138118	0.000183486	0
167.8	-0.0102578	0.0117225	-0.00844308	-0.00207527	-0.00115493	0.0288374	0.00275136	0.0122298	0.00951047	0.0203998	0
168	0.0516388	0.0130592	0.0126714	-0.00254504	0.001407	0.0284752	0.0183713	0.00241311	0.0298828	0.0427856	0
168.2	0.0187057	-0.000913146	-0.0350501	0.0106707	-0.0180277	-0.0130677	0.00869129	0.0189689	-0.0327758	0.0129621	0
168.4	0.0108284	0.0378513	-0.0423434	-0.0341575	-0.0413491	-0.0285689	0.0102247	-0.0237909	0.00481475	0.0261659	0
168.6	0.0680522	0.0405543	0.0095172	-0.0132012	-0.000731932	-0.00282075	-0.0356789	0.0197724	0.0335041	0.0195249	0
168.8	0.0289764	0.0333141	0.000265626	0.00196289	0.0143346	0.0347123	0.0669508	-0.00255833	0.00308362	0.0144086	0
169	-0.0283759	-0.0314491	0.016133	-0.0182962	-0.0135198	0.00038073	0.00670365	-0.0056692	-0.0132603	0.000259667	0
169.2	-0.0322121	-0.0424122	0.0201688	-0.0292587	-0.00736902	-0.0261308	-0.0601217	-0.00432879	-0.0273826	-0.00557551	0
169.4	-0.0143612	-0.0133311	0.00754862	-0.0125791	0.00897147	0.000684007	-0.00701925	0.00829321	-0.0667826	0.00149425	0
169.6	-0.0131365	-0.0323381	0.0332461	0.03285	-0.000989276	-0.00123494	-0.0153095	0.043119	-0.0648984	0.00957694	0
169.8	-0.0300829	-0.00266785	0.00515376	0.0673155	0.0396093	-0.0365339	0.00853491	-0.0428526	-0.00530279	0.0334323	0
170	-0.0336423	-0.089249	-0.0191104	-0.0621601	0.0113305	-0.0571818	-0.0108837	-0.0545445	-0.0334647	0.0291756	0
170.2	-0.00869896	-0.0427433	-0.0395566	0.0290461	-0.0074923	-0.0338785	-0.010242	0.0241078	-0.0109842	0.0154931	0
170.4	0.00042085	0.00517105	-0.0118314	0.0410489	0.0283099	-0.0330726	-0.00963038	0.0156056	0.00682179	-0.00315397	0
170.6	0.0134009	-0.0178184	0.0153662	-0.0212194	0.0172331	-0.0170437	-0.0154813	-0.0465343	-0.0180103	0.0189468	0
170.8	0.0466172	-0.0184182	0.00422427	-0.00258506	-0.0282115	0.0280093	-0.00384581	-0.0264983	0.0180266	0.058985	0
171	0.0498909	0.00182174	0.00615697	-0.0487961	0.00497233	0.0365164	0.00655501	0.0229601	0.0953358	0.031744	0
171.2	0.0188888	0.0347537	-0.0126144	-3.30388e-05	0.00760747	0.0627511	0.0116843	0.00937862	0.036507	0.0067608	0
171.4	-0.0380129	0.0133296	-0.0452079	-0.0265643	-0.0139812	0.0119496	0.0408494	0.0175822	0.00321792	0.0259842	0
171.6	-0.0178233	0.00655874	-0.0209866	0.0179667	-0.00693652	0.019893	0.0187704	0.0397599	-0.01654	-0.0190848	0
171.8	-0.0261462	-0.0173867	0.00964941	0.0324342	-0.00502515	0.032806	0.00145709	-0.0129234	0.00544702	-0.0516744	0
172	-0.0687362	-0.000471086	-0.0663781	-0.0435147	-0.00672186	-0.0160327	-0.0311047	-0.0281796	0.0136232	-0.00688927	0
172.2	-0.0322362	0.0564379	-0.110589	-0.0665197	0.0155996	-0.0482177	-0.0792008	0.0390854	-0.0219886	0.0278511	0
172.4	0.0175836	-0.0161087	0.0264488	-0.0116312	0.0168193	-0.0232764	-0.000667263	-0.00265127	0.00306097	0.020496	0
172.6	-6.90505e-05	-0.0410909	-0.0553915	0.0266021	-0.012826	0.0113327	0.0592164	-0.0106946	-0.0203926	0.0416657	0
172.8	-0.0136734	0.0218056	-0.0209376	-0.0491969	-0.0396527	0.00653926	0.00560493	0.0137348	0.0225798	-0.0364942	0
173	0.0135799	0.0341939	0.0154586	-0.0388343	-0.0250879	-0.0377619	-0.0261267	-0.0460707	0.0411381	-0.0466168	0
173.2	-0.00176963	-0.0404519	0.0218393	0.00226624	0.00242636	-0.0334665	0.00124223	-0.0769374	0.013115	-0.0415016	0
173.4	-0.0198089	-0.0431981	0.0149403	0.0284908	0.00767222	0.000579409	0.0132082	-0.0223123	-0.0297757	-0.0455128	0
173.6	0.0362277	0.0474729	-0.0300193	0.074271	0.00124001	-0.00998953	0.000208915	-0.014956	-0.0709524	0.0198847	0
173.8	0.0164765	0.00510599	0.0301566	-0.0322333	0.000359044	0.003379	-0.00170407	-0.0347311	-0.0418112	-0.0195937	0
174	-0.0428202	-0.0136194	-0.0239724	-0.0297784	0.0167475	-0.00629062	-0.0196163	0.00455025	-0.0356668	-0.0369826	0
174.2	-0.00641594	0.0123773	-0.00809349	0.00737991	0.0273963	0.0336349	-0.0174073	0.0706214	-0.00300042	-0.0285171	0
174.4	0.0121199	-0.011893	0.107114	0.0629295	0.0180946	0.0237822	-0.00592264	0.0800881	0.0451953	-0.0430414	0
174.6	-0.00357045	-0.0251554	0.0692502	0.0307282	-0.00438485	-0.00929719	0.0106673	0.0380998	0.0128181	-0.0270323	0
174.8	0.00778864	0.0314005	-0.0398911	-0.0423911	-0.0132713	0.0160167	0.0192395	0.0149997	-0.0254962	0.0202273	0
175	0.00476922	0.0438532	0.0414828	0.0124045	0.00562745	0.0244257	-0.0155759	-0.0013694	0.0435243	0.00803056	0
175.2	0.0149687	-0.00590775	-0.0150906	-0.0503536	0.018529	0.0149912	-0.0407387	-0.0656224	0.0155069	0.00540868	0
175.4	-0.0191673	-0.00736315	0.0233282	-0.0142744	0.0148741	0.0249785	0.00584237	0.00965405	0.0186711	0.0334593	0
175.6	0.00952014	-0.0104306	0.0208272	0.00365498	-0.0126742	-0.0048979	-0.01786	0.015475	0.0347802	0.0121057	0
175.8	0.0170295	-0.026425	-0.0320043	0.0125413	-0.0231545	-0.0446188	0.0233621	-0.0237886	0.0256023	-0.00643032	0
176	-0.0297833	-0.0349719	-0.0292704	0.0406038	-0.0179969	-0.0380529	0.0289179	-0.0397281	-0.0286076	-0.0260971	0
176.2	-0.0426675	-0.040537	-0.0095266	0.0259729	-0.0103218	-0.0317189	-0.0623197	-0.0522216	-0.0721917	-0.0679371	0
176.4	-0.043222	-0.0394423	-0.0410973	-0.00289841	0.0221972	-0.0484919	0.0578857	0.00351321	0.00861519	-0.0234202	0
176.6	-0.00976827	-0.0405831	-0.0503049	-0.0515756	0.000445203	0.0293421	-0.0204506	0.00459363	0.0797996	0.022903	0
176.8	0.0165353	-0.0154081	-0.0123484	-0.0589556	-0.0143435	-0.0408618	-0.00773185	-0.00954487	-0.0130542	0.0149563	0
177	-0.00931026	0.038492	-0.025011	-0.0288492	0.0231144	-0.0608903	-0.028111	0.0222718	-0.0197856	-3.18078e-05	0
177.2	-0.0205542	0.0456911	0.0575673	0.00345645	0.0267502	-0.00351052	-0.0390883	0.0278361	0.0138865	-0.00404706	0
177.4	0.0316733	0.0194132	0.107649	0.0366348	-0.0103572	0.012565	0.0129089	-0.00750938	-0.00636175	-0.0117426	0
177.6	0.0644986	0.0276484	-0.0477455	0.0426709	0.00433532	0.0313856	-0.00527115	0.00724059	0.0128506	-0.00819995	0
177.8	0.0200904	-0.00560882	0.0252986	-0.0247968	0.020343	0.0433612	0.02524	0.0310274	-0.0259313	0.00763524	0
178	0.0122547	-0.0371305	-0.0495092	-0.00216801	0.00436819	0.0299801	-0.0162687	-0.00685978	0.0121809	-0.0206548	0
178.2	0.0204318	0.0463754	0.00624465	0.0262411	0.0064041	-0.0162121	-0.0476761	-0.00945785	-0.0489125	-0.0140127	0
178.4	-0.0373929	0.0432037	0.0662515	-0.0101073	-0.00681176	0.00745361	-0.00834214	-0.0695507	-0.0535191	-0.0116115	0
178.6	-0.0737824	-0.0292043	-0.0446671	-0.0154825	-0.0116908	0.0303724	-0.00490363	-0.0702059	0.0187665	-0.0515195	0
178.8	-0.0166973	0.00187788	-0.0919789	0.00188824	-0.000113167	0.00848918	-0.0233225	0.0437963	-0.0179221	-0.0771606	0
179	0.0235072	0.0400059	0.0423916	-0.0494737	-0.0140097	0.0494615	0.0555047	0.030837	-0.066404	-0.0616908	0
179.2	0.0125569	0.018683	0.0160829	0.0212444	0.0427086	0.00695684	0.0357491	0.0297069	0.0471473	-0.0556744	0
179.4	-0.0776543	0.0112587	0.00486346	0.0513076	-0.0171656	0.00442819	0.0096158	0.0360669	0.00781286	-0.0259854	0
179.6	-0.0221855	-0.0812004	0.0119601	0.0361169	-0.0397826	0.00110332	0.0139536	-0.0409007	-0.0227458	0.0101098	0
179.8	0.0387191	-0.0892713	-0.0376772	0.0152498	0.00633043	-0.0383875	-0.022792	-0.0547584	0.0262719	0.00500671	0
180	-0.00534732	-0.0127726	-0.0457269	-0.00988317	0.0196189	-0.0439345	-0.0314552	-0.00352582	0.0203416	-0.00899969	0
180.2	0.0193961	-0.0171946	-0.00475314	-0.0309275	0.00151657	-0.00127744	0.0272299	-0.0385775	-0.0345588	0.0146657	0
180.4	0.0785458	0.013064	-0.0596417	-0.00951561	-0.00239628	0.00526389	-0.00935261	-0.050816	0.00737994	0.0233898	0
180.6	-0.027825	-0.0229918	0.0672367	0.0776401	-0.00724601	0.0184798	-0.000741109	0.0247368	0.0864739	0.00683718	0
180.8	-0.0054713	0.00263819	0.0414963	0.0191743	0.00127233	0.0304361	0.0232041	0.0761658	0.0150556	0.0216095	0
181	0.0485403	0.0196361	0.0302508	-0.0183478	-0.0128417	0.0256001	0.0509892	0.0469465	-0.014877	0.0195083	0
181.2	0.0213967	0.0186121	0.0679488	-0.0224995	0.00577849	0.0111985	0.00436264	0.00840882	-0.00116403	-0.0187707	0
181.4	0.0155122	0.0676986	0.00926874	-0.0257837	0.0216852	0.000262201	-0.0319431	0.0138798	-6.3657e-06	-0.0321225	0
181.6	0.0442461	0.0830046	-0.0446606	0.0287226	-0.0290959	0.00193394	0.0593973	0.02627	0.0344411	0.00106049	0
181.8	-0.00221081	-0.0216037	-0.00557904	-0.0477841	0.0235332	0.0090682	0.0270248	0.0186038	-0.0409684	0.0205041	0
182	0.0149299	-0.0169602	0.0471878	-0.0494169	-0.0150193	-0.0305147	0.0161854	-0.0121615	0.0444442	0.0311893	0
182.2	-0.0333354	0.0563377	0.0178891	0.0160733	-0.050028	-0.0286494	0.0531387	-0.0182325	-0.000472746	0.0392902	0
182.4	-0.0481415	0.0587446	0.00283293	-0.0198116	-0.00638754	-0.0133866	-0.0313559	-0.00147576	-0.0447599	0.0611336	0
182.6	0.0168671	0.0200855	-0.0124821	-0.0236904	0.0274041	-0.0107131	-0.080528	0.0290044	-0.0387979	0.0757379	0
182.8	0.0438496	0.0259465	-0.025091	0.0662823	0.00374933	0.0158667	0.0181361	0.0443876	-0.032893	0.0679602	0
183	0.0222976	0.0269413	0.0773667	0.0219371	0.00385675	0.0363317	0.00548516	0.0256273	0.0951007	0.0766043	0
183.2	0.000430863	-0.0107491	0.0541963	0.0575986	0.0263159	0.00229563	0.0267025	0.065146	0.00609348	0.105012	0
183.4	0.0731858	0.00913017	0.0155539	0.0160346	0.00802193	-0.00096503	0.0244362	0.0324613	-0.00593341	0.137707	0
183.6	0.0558226	0.0389186	-0.0144719	-0.0677889	0.0252294	0.0123123	0.00635956	-0.0290136	0.0321536	0.127874	0
183.8	-0.0070335	0.00194766	0.00238866	-0.0576239	0.0324877	0.019726	0.0505935	-0.0152007	0.0370277	0.0917605	0
184	0.00294585	-0.0457968	0.0269297	-0.0268672	0.00251753	0.043738	0.0816101	0.0420595	0.0280164	0.110219	0
184.2	0.0346565	-0.0238006	-0.000215836	-0.05943	0.0150886	0.0663979	0.0264671	0.0580192	0.0162753	0.158649	0
184.4	0.0574413	0.00416442	0.019588	-0.0195554	0.0364141	0.0334159	0.035278	0.0543258	0.00935095	0.126528	0
184.6	0.0482526	-0.0144663	0.0353836	-0.0133427	0.00107836	0.0159381	0.0532513	0.0463782	0.00506055	0.151827	0
184.8	0.0252498	-0.0238502	0.102937	0.0252273	0.0397329	0.0152044	0.0292423	0.0270236	-0.0188283	0.100908	0
185	0.0424731	0.0404194	0.0172578	0.026107	0.0565079	-0.00248867	0.00334446	0.0603602	-0.0237827	0.0525644	0
185.2	0.0499893	-0.0179628	-0.0276575	-0.0146981	0.015269	-0.0291741	-0.0127333	0.0344028	-0.0281235	0.0511163	0
185.4	-0.000310218	-0.123514	0.0541235	-0.0400007	-0.0140695	-0.0178351	-0.00974778	-0.0466164	-0.0232696	0.0579136	0
185.6	-0.0382211	-0.00640584	-0.0288655	-0.0229947	-0.0295249	-0.00172226	0.00559412	-0.00925965	0.022463	0.0758945	0
185.8	-0.0145566	-0.0319872	-0.0234429	0.0824951	-0.0169381	-0.0791121	-0.0545516	-0.0186638	-0.00408209	0.0520834	0
186	0.0448254	-0.0339403	-0.0240528	0.0158695	0.00181355	-0.0614537	-0.0407095	-0.0425373	-0.0208865	0.0627703	1
186.2	0.00386936	-0.0376116	-0.0425142	-0.0627039	-0.00544119	-0.0469692	-0.0218488	-0.0312187	-0.0239392	0.00996814	1
186.4	-0.0274482	-0.0267922	-0.090854	-0.0749419	-0.0114476	-0.0652816	-0.0233186	-0.0140797	-0.0225012	0.00245383	1
186.6	-0.00607353	-0.0185313	-0.0960248	-0.0760445	-0.00756359	-0.0696626	-0.028262	0.00236526	0.00896562	0.0942959	1
186.8	-0.0156763	-0.0540795	-0.0114601	-0.0719399	-0.00654014	-0.0533861	-0.0376678	0.0156034	0.0367375	0.127088	1
187	-0.0277146	-0.0563081	0.044592	-0.0547939	-0.00125311	-0.0411934	-0.0308617	-0.0208022	0.00954498	0.0687802	1
187.2	-0.0758898	-0.0390466	0.0661906	-0.0507106	-0.0242473	-0.0937083	-0.0321926	-0.0511098	0.0363134	0.0986192	1
187.4	-0.0826891	-0.0241647	0.00911736	-0.0457856	-0.019298	-0.0728281	-0.0529134	-0.00970831	0.0206716	0.118229	1
187.6	-0.0541435	0.0068565	0.00556619	-0.0278024	-0.00782972	-0.00367172	-0.0359529	0.0195643	0.0231051	0.119941	1
187.8	-0.014262	0.0459148	0.0338465	-0.000647535	-0.0219081	0.0275182	0.00703065	0.011591	-0.0112813	0.0896511	1
188	-0.0130731	0.000810915	-0.0440516	0.0177659	-0.0375271	0.00390632	0.020937	0.00477567	-0.0329168	0.060003	1
188.2	-0.0595866	-0.0861044	-0.133245	0.00604779	-0.0227839	-0.0459264	-0.0106073	-0.0220271	0.0366492	0.0824333	1
188.4	-0.0461125	0.000923486	-0.0232496	-0.0240534	0.0017972	-0.0816904	-0.0475161	-0.0761714	-0.0290851	0.0587608	1
188.6	-0.0255507	0.0359403	0.0149193	-0.0042969	0.00601523	-0.0468917	0.00493019	-0.0299802	-0.0376656	0.00585804	1
188.8	-0.0234424	0.0171998	-0.0617254	0.045044	0.00735917	-0.017139	-0.0355891	-0.00248067	-0.00362911	0.0232026	1
189	-0.0517825	0.00887009	-0.117036	0.0509315	0.00617739	-0.0380438	-0.0587305	0.00305056	0.0122896	0.0390669	0
189.2	-0.0777212	-0.0200657	-0.067814	0.0319559	0.00448263	-0.0503255	-0.0378616	0.00949251	-0.00970618	0.0237736	0
189.4	-0.0559311	-0.0511628	-0.0250765	0.00985771	0.00302615	-0.0320158	-0.0648311	-0.0372675	-0.0382644	0.0255269	0
189.6	-0.0187913	-0.03654	-0.095128	-0.0266665	0.000372059	-0.0422504	-0.0752946	-0.0879802	-0.0194818	0.0216699	0
189.8	-0.0482841	-0.0880271	-0.102269	-0.00342197	0.0127885	-0.0557592	-0.0594349	-0.000267834	0.0158391	0.00333177	0
190	-0.0897118	-0.0403158	-0.0637312	-0.0649723	-0.0141374	-0.0551475	-0.0584811	-0.0428674	-0.00955953	0.0565891	0
190.2	-0.0140449	-0.0315224	-0.0649674	-0.0244394	0.00669985	-0.0214273	-0.0341296	-0.0681811	-0.00800519	0.0762421	0
190.4	-0.0362486	0.00127963	-0.0104442	0.00142565	0.00822916	0.0247137	-0.0113245	-0.0250431	0.0374058	0.0487694	0
190.6	-0.0927691	0.0849295	0.0163425	-0.0200794	0.00377539	0.042709	-0.0131615	-0.00433335	0.0493094	0.00779734	0
190.8	0.0220951	0.0528464	-0.0583655	0.029342	0.0445496	0.0216442	-0.0184378	-0.00598166	0.0139424	-0.013234	0
191	0.0363173	-0.0348238	5.74915e-05	0.0305001	0.00684438	-0.00908567	-0.00720277	-0.00165675	0.000483511	0.0342359	0
191.2	-0.0224459	0.0499184	0.0161432	0.0787779	0.00659336	-0.0117598	0.0639729	-0.0204219	0.00218708	0.0169264	0
191.4	0.0359022	0.0100632	-0.0248695	-0.0229731	-0.0027612	0.0190214	0.0361515	0.0076599	-0.0335729	-0.0202435	0
191.6	0.0565961	-0.00298121	0.0056716	-0.0373569	-0.0192441	0.00380117	0.0284822	0.0287838	-0.0320212	-0.00252755	0
191.8	0.0238675	0.0294379	0.0800741	0.0354242	0.00427095	0.0049198	0.0558886	0.0343258	0.00202201	0.0232173	0
192	0.012172	0.0390499	0.0874281	0.0560989	0.0184633	0.0404324	0.0584077	0.0416633	-0.0138057	0.0161744	0
192.2	0.00801484	0.0688578	0.0703471	0.086848	-0.0165702	0.0273015	0.0687645	0.0261853	-0.0238309	0.0189808	0
192.4	0.0639285	-0.00500879	0.105044	0.0599232	0.00349049	0.0391464	0.0442663	0.0156291	0.074014	0.0236064	0
192.6	0.00466333	0.0401383	0.0108408	-0.0289819	-0.00991357	0.0284148	0.0215752	0.00958274	0.0376258	0.00394397	0
192.8	0.0324421	0.070636	0.0368968	0.0162809	0.0196283	0.0588082	0.00134003	0.0255357	0.0312492	0.0456322	0
193	0.0404557	0.03335	0.0263979	-0.0121576	0.0318866	0.0432884	0.0153586	0.0553626	0.0306298	0.0266202	0
193.2	-0.00351146	-0.00178772	0.0149454	-0.0703169	-0.00415265	-0.00106746	-0.00678922	0.0217028	-0.0184256	-0.0205934	0
193.4	0.000167013	-0.00691606	0.0521234	0.00607173	-0.0136601	-0.0118702	-0.0619012	-0.0447769	-0.0220153	0.0155376	0
193.6	-0.00560842	0.00490169	-0.111008	0.017404	0.0016102	-0.0465904	-0.027343	-0.0260675	0.00738469	0.0176583	0
193.8	0.0362165	0.0231956	-0.115963	0.00653533	-0.014173	-0.0204666	-0.0414111	-0.0306323	-0.0597559	-0.030902	0
194	0.0125211	-0.00603728	-0.043051	-0.0109677	-0.00388053	-0.0237017	-0.0308503	-0.00155709	-0.0238411	-0.0262373	0
194.2	-0.0213361	-0.0749837	-0.00237531	-0.0413121	-0.00599662	-0.0445988	-0.0211092	-0.0101257	-0.00340496	-0.0171365	0
194.4	-0.0169905	-0.0831831	-0.00555557	-0.0145326	-0.0373633	-0.0237192	0.0107903	-0.0545743	-0.0120199	-0.0273558	0
194.6	-0.0423851	-0.0486717	-0.0650022	0.0148	-0.0381869	-0.0121097	0.00753586	-0.0573838	-0.00957879	-0.00852743	0
194.8	-0.0716894	-0.0555203	-0.129893	-0.0366584	0.00499614	-0.0356205	-0.0388453	-0.013499	-0.0211679	0.0156838	0
195	0.00736202	-0.0315707	-0.0498764	-0.0345487	0.0112459	0.00216918	0.0310596	0.017901	0.0118046	-0.0201242	0
195.2	-0.0277696	0.0352021	0.077746	0.0266739	-0.0152705	-0.0075651	-0.0264738	0.0199156	0.0410034	0.00147224	0
195.4	-0.0499468	0.0470726	-0.0243223	0.066384	-0.0232538	0.00231817	-0.0302476	0.0061749	-0.00247489	0.0092292	0
195.6	-0.0228803	0.0129964	0.0375232	-0.024292	0.0141336	0.0504809	0.0427552	0.0407895	0.0103263	0.01453	0
195.8	-0.0111957	-0.00339773	0.0337029	-0.0540532	0.0343638	0.0542646	0.0368584	0.0126736	0.0209229	0.052438	0
196	-0.0311174	0.0150469	-0.103947	0.0326347	0.0243674	-0.0023167	-0.0295529	-0.0387501	-0.0170588	0.0596374	0
196.2	-0.0381064	0.0106255	0.0594181	-0.0193427	0.0285023	-0.040017	-0.0278751	0.0178755	0.0192187	0.0165849	0
196.4	-0.00250564	-0.0613862	-0.0152215	-0.0839441	-0.0103656	-0.0436048	-0.0350646	-0.0576033	0.0325593	0.0433556	0
196.6	0.0165275	-0.046598	0.0566588	0.0721825	-0.0187289	-0.0208079	-0.00757357	0.0149872	0.0195506	0.0105541	0
196.8	0.0225354	0.0046847	0.0550667	0.0441393	-0.00979488	-0.0283242	-0.0140202	-0.0114751	-0.0359465	-0.0652197	0
197	0.0348039	0.027783	-0.0500537	-0.01516	0.0070349	-0.0276983	0.00939946	-0.049551	-0.0265201	-0.0305144	0
197.2	0.00825065	-0.00158005	-0.047237	0.0429502	0.00832846	-0.0358893	0.00720551	-0.0295069	0.0238884	0.00413497	0
197.4	-0.0342685	-0.0406703	0.0263722	0.0224019	-0.0081158	-0.0436706	-0.0600988	-0.0262564	0.0234002	-0.0568703	0
197.6	0.00147446	0.00208659	0.0254785	-0.0227838	0.00801816	0.0426513	-0.010702	0.0436447	0.0160823	-0.0328387	0
197.8	0.00962904	0.0711309	0.116754	0.0600492	0.0246278	0.0772263	0.06305	0.0382477	-0.0421915	-0.053804	0
198	0.0414415	0.0664292	0.0775541	0.00849677	0.0208487	0.0809054	0.0789629	0.0493802	-0.0384628	-0.0438595	0
198.2	0.0475425	-0.00794902	-0.0523108	0.0644004	-0.0103898	0.0398059	0.045531	0.0432005	-0.0170891	-0.0453015	0
198.4	0.0147166	-0.00911021	-0.0113485	0.0284459	-0.00842441	0.0120194	0.00277257	0.0269138	-0.0112855	-0.0576142	0
198.6	0.0132885	0.0230307	0.0807073	-0.105029	0.0236948	0.0180374	-0.0234097	-0.000693914	0.00907897	-0.000474348	0
198.8	0.022479	-0.0239434	0.0153342	-0.0109939	0.0106014	0.0168744	-0.00961374	-0.0164247	0.0271543	0.0514415	0
199	-0.0304603	-0.0061942	0.0584254	-0.0144397	-0.0220654	0.0366601	0.0542361	0.0720892	0.00190581	-0.0432675	0
199.2	0.0515912	-0.0125362	0.0317386	-0.083558	-0.0175432	0.005257	0.0809903	0.00212379	-0.00856464	-0.00337345	0
199.4	0.0746277	-0.0362267	-0.0368098	-0.013915	-0.0048243	-0.00804686	-0.00279212	-0.0196494	-0.0227162	0.00859676	0
199.6	0.0216795	0.0212187	-0.03381	0.0797046	0.00468737	0.021349	0.00380541	0.0349024	0.0255921	0.0241816	0
199.8	-0.0171162	0.0624929	0.0164968	0.0253789	-0.00901545	0.0291708	0.0581974	0.0288136	0.0874353	0.0291864	0
200	-0.0015414	0.0300515	0.0232076	-0.0525877	-0.0241129	0.013503	0.0125624	-0.00567369	0.0685848	0.0188579	0
200.2	0.0365341	0.0176653	-0.0286277	0.0271427	-0.00662529	0.0247464	-0.00457156	0.0323752	-0.000696718	0.0744224	0
200.4	-0.00395886	-0.0557064	-0.0838337	0.081242	-0.02699	-0.00306733	0.0479263	0.0214466	-0.0607867	0.0205298	0
200.6	0.0152352	0.0233179	-0.0318766	0.0339456	0.00512153	-0.0318766	-0.0176837	-0.013311	0.0381593	0.044262	0
200.8	-0.028202	0.0145813	-0.0161954	-0.0739843	0.00320238	0.0229827	-0.0758354	-0.0365985	0.0876059	0.0272666	0
201	-0.0724504	-0.0245821	-0.0283783	-0.0611806	-0.00080664	-0.00548438	-0.0637429	-0.0414831	-0.0202445	0.0132756	0
201.2	-0.039175	-0.00527879	-0.0204383	-0.0140302	0.00566918	-0.0770794	-0.0394792	-0.0185699	-0.0875981	0.00980159	0
201.4	-0.0184099	-0.0167188	-0.0534424	-0.0591982	-0.00896742	-0.0297646	-0.04748	-0.00260407	-0.0227309	-0.0215757	0
201.6	-0.0420061	-0.0108712	-0.0727494	-0.00502221	0.0124289	-0.0211756	-0.0657823	-0.0439611	-0.0438118	0.0309629	0
201.8	-0.0320809	0.000383437	0.073152	0.0339468	-0.00578398	-0.0514515	-0.00319998	-0.0370893	-0.114163	0.00770752	0
202	0.0167965	-0.037292	-0.0117314	-0.000448078	-0.0216452	-0.0164641	-0.0166599	0.0180204	-0.0112145	-0.0138455	0
202.2	0.019636	0.000575424	-0.0725142	0.0166569	0.0338992	-0.0106387	0.022182	-0.0125867	0.0334517	0.0115767	0
202.4	-0.0123658	0.0121731	0.0204233	0.0183166	0.0425876	-0.0243391	0.0264551	-0.03863	-0.00333303	0.00364157	0
202.6	-0.0288017	-0.00799997	0.0417355	-0.0130003	-0.00531355	-0.00993525	-0.0370915	0.000210026	-0.0108421	0.00613762	0
202.8	-0.0139665	0.0468971	-0.00692532	0.0294909	0.0190906	-0.00956083	0.00701303	0.0186193	-0.0132576	0.0557099	0
203	0.0373032	-0.0328085	0.066858	0.0258758	0.014961	-0.000506406	0.0310585	0.0678162	0.0471474	-0.0313282	0
203.2	-0.00508371	-0.0125519	0.00188622	0.0195713	-0.0189102	0.00106763	-0.00241944	0.00788264	0.0413592	-0.0131714	0
203.4	-0.0222926	0.00482535	-0.00886492	-0.0318159	-0.0356974	-0.00100208	-0.0666465	-0.0292951	0.0346509	-0.0185891	0
203.6	-0.0184093	-0.0117803	-0.0222911	-0.0407043	-0.0180472	0.00322716	-0.0171022	0.00620336	0.00987469	-0.00980786	0
203.8	-0.0282433	-0.0128252	-0.0487715	-0.0337008	-0.0135902	0.000514452	0.0198428	-0.0069103	-0.0131389	0.0151515	0
204	-0.0174049	-0.00365111	0.013723	-0.0525936	-0.0140863	-0.0114404	-0.0162773	-0.0540236	0.0140644	0.00343992	0
204.2	-0.000106097	-0.00404767	0.0513462	-0.0118558	0.0412593	-0.0174669	0.0503727	-0.01297	0.0330237	0.00855657	0
204.4	-0.0317388	-0.0155834	-0.0308007	-0.0248717	0.0535726	-0.039012	-0.0165846	-0.0315057	0.0152134	-0.0276416	0
204.6	-0.0429399	-0.0451933	-0.0818989	-0.079903	-0.0161515	-0.05241	-0.0439639	-0.0221576	-0.00971864	0.000990372	0
204.8	-0.010902	-0.0210629	-0.0232438	0.0351697	0.0039773	-0.0366286	-0.0563677	-0.0182513	-0.0425383	0.0113748	0
205	-0.00106459	-0.0210751	0.00163513	0.0169619	0.0607755	-0.0466166	-0.0660878	-0.0490587	-0.0712672	-0.0263436	0
205.2	-0.0404275	-0.0341494	-0.0229897	-0.0671805	0.0304451	-0.0638006	-0.0431764	-0.0674489	-0.0717543	-0.0408274	0
205.4	-0.0575935	0.0228408	-0.0296946	0.0691323	-0.0327158	-0.0403094	-0.0361367	-0.067847	-0.0520416	-0.0207171	0
205.6	-0.00558101	0.0177938	-0.082824	0.0374168	-0.037571	-0.0303564	-0.0635978	-0.0778349	-0.0301868	-0.0291357	0
205.8	0.0121434	-0.0729014	0.0028961	0.0132911	-0.00105907	0.000105717	-0.0161954	-0.00161178	0.0126416	-0.0481651	0
206	-0.0623675	-0.0273365	0.0344634	0.0408059	-0.00064182	-0.0506485	-0.0198169	0.00137553	-0.0348468	-0.0269615	0
206.2	0.0332887	0.0663308	0.0329978	0.00447313	-0.0207943	0.0217738	0.0372615	-0.0215085	-0.0161983	-0.0235971	0
206.4	0.121566	0.0677805	0.0759091	-0.021743	-0.0233038	0.165563	0.119991	0.0781957	0.0485205	-0.0473863	0
206.6	0.0552949	0.0585556	0.075187	-0.0124518	-0.00667037	0.155367	0.128334	0.152402	0.0404644	-0.0354304	0
206.8	0.0600231	0.0736082	0.00199528	-0.0478977	0.000352379	0.0585664	0.109802	0.0449828	0.0345682	-0.010188	0
207	0.00830164	-0.055135	0.0152886	0.00626287	-0.0218901	0.0458077	0.0386653	0.0448256	0.0643294	-0.0572403	0
207.2	-0.02433	-0.053515	-0.0213087	-0.0225233	-0.00555232	0.0315966	-0.00671202	-0.00509356	0.0333955	-0.0492209	0
207.4	-0.00701882	-0.00544603	-0.00186885	0.00955084	0.00978095	-0.016067	-0.0359475	-0.0432171	-0.0286257	-0.0349191	0
207.6	0.0277823	-0.0316132	-0.000259482	0.0426282	0.0222594	-0.0351419	-0.0419189	-0.000561268	0.00225578	-0.0196587	0
207.8	0.0130362	-0.00119787	-0.0358481	0.0537477	-0.00440968	-0.00725545	-0.0403606	0.0243622	0.0737177	0.000129379	0
208	-0.00725105	0.0675753	0.0180286	0.075316	-0.022173	0.020029	-0.0393753	-0.00466829	0.0267817	-0.00372809	0
208.2	0.0450336	-0.0308936	0.0712954	0.0177499	0.053548	0.0170331	0.00311593	0.0215699	-0.0745927	-0.00120425	0
208.4	-0.00880731	-0.00940109	-0.0723626	0.0153337	-0.00552242	-0.00399444	0.0408362	0.0430093	-0.00892824	0.0484124	0
208.6	-0.0359026	0.0414431	0.0175312	0.0678848	0.0207504	0.00462827	0.0165707	0.0525722	0.0619482	0.0635417	0
208.8	0.0298433	0.0330003	0.0750316	0.0604466	0.0397433	0.0179012	0.0204693	0.0555842	0.0430436	0.0556602	0
209	0.0244933	0.0195826	0.0205643	0.016743	-0.0137604	0.0134044	0.05813	-0.000596823	0.0224666	0.0325253	0
209.2	0.0121544	0.00226374	-0.0331735	-0.0148192	-0.0416499	0.0187648	0.0544141	-0.0198783	-0.00147133	0.024264	0
209.4	0.0739254	-0.0177239	-0.0489313	-0.03728	-0.0120554	0.0226199	0.00150124	0.0281243	-0.0553753	0.021809	0
209.6	-0.0621567	0.0450207	0.0514386	-0.0372485	0.00667244	-0.0379522	-0.0397814	-0.0750798	-0.0172504	-0.0459106	0
209.8	-0.074511	-0.00293125	-0.0366682	-0.122099	0.0256083	-0.0738127	-0.0344604	-0.0605392	-0.0306258	-0.00456566	0
210	0.0101077	-0.0157135	-0.0173798	-0.125226	0.000798702	-0.0547746	-0.00103523	-0.00914978	-0.0470285	-0.0255848	0
210.2	0.0185758	-0.0288989	0.0280923	0.00133384	-0.0176478	-0.0539011	0.0202769	-0.0312176	-0.0592038	-0.00318468	0
210.4	-0.037552	-0.0493965	0.0206453	0.0441441	-0.019622	-0.0264878	-0.0181533	-0.0416961	-0.0139379	0.0238462	0
210.6	-0.0488853	-0.0152187	-0.00392343	-0.00192712	-0.0356286	0.0323191	-0.0439022	0.0165462	0.0329797	-0.0268183	0
210.8	-0.00717658	0.0281663	-0.0579365	0.0517501	-0.0330594	0.00432624	0.00604453	0.0286354	-0.00850622	-0.0179284	0
211	0.0264102	0.0432746	0.0195739	0.0251685	0.000719705	-0.036968	-0.0434193	-0.0266826	0.0645549	0.00806534	0
211.2	0.00415825	0.0290144	0.101393	0.0264283	-0.0233735	-0.0147299	-0.0566346	0.0212281	0.0356335	0.0268377	0
211.4	-0.00442245	-0.000316793	-0.0346948	0.0247926	-0.00728717	0.0150869	0.00824401	-0.0226643	0.00138259	0.0349881	0
211.6	0.0237193	-0.0122757	-0.0331244	0.0199124	0.0309828	0.032172	0.0252776	-0.0053202	0.0474724	0.0412024	0
211.8	0.0198376	0.00772208	0.0410025	0.000222056	0.0202209	0.0587297	0.0122139	0.0747921	0.022155	0.0195919	0
212	-0.0100064	0.0219882	-0.0376804	-0.0454266	-0.00600083	0.0416678	0.0451798	0.0549245	-0.069149	-0.00725205	0
212.2	0.0207779	-0.000117931	0.0404513	-0.0458159	0.00358029	-0.0425766	0.0328495	0.060266	-0.0115195	0.0327193	0
212.4	0.0212701	0.00226887	-0.081491	-0.0140203	0.00619125	0.000377068	-0.000204698	-0.0201097	-0.0297466	0.0408876	0
212.6	0.0168327	0.00785336	-0.0530252	0.0242924	-0.000492974	0.00912207	-0.000790396	-0.00330616	-0.0110353	0.0167549	0
212.8	0.028043	-0.00693637	-0.0355511	0.00919692	0.00591369	0.00592763	0.0318975	0.0233965	-0.0479373	-0.018735	0
213	0.00452962	-0.0215361	0.015261	-0.0190536	0.0139545	0.0163104	0.0121976	-0.015268	-0.031248	-0.0184155	0
213.2	-0.0409479	-0.0222433	0.0839957	-0.00208829	0.0173033	0.0201134	-0.019441	-0.0558172	0.0451118	0.0168691	0
213.4	-0.0492884	-0.0282205	-0.0166559	0.02036	0.0124058	0.0182239	0.006304	-0.0319908	0.0301319	0.0267589	0
213.6	-0.0537593	-0.0317174	-0.00619778	0.0172324	-0.015413	-0.00840657	-0.0336556	0.0259166	0.0703438	0.00453833	0
213.8	-0.0179961	0.00834722	0.00238201	0.0508662	0.0162685	0.00759315	-0.0112373	-0.0563972	-0.0158929	-0.01389	0
214	0.0409686	-0.00927394	0.00877035	-0.028544	-0.0244525	-0.0105423	-0.00632269	-0.0270954	-0.0351334	-0.0114195	0
214.2	0.0207356	0.0121674	-0.0245485	-0.0412748	-0.00837798	-0.0397743	-0.0163804	0.0178699	-0.0239956	-0.0344197	0
214.4	-0.0248196	0.0158727	-0.0156464	0.0117479	0.017592	-0.0273056	-0.009812	-0.0189976	-0.05223	-0.0370602	0
214.6	-0.0203788	-0.0314174	0.0227489	0.00667599	-0.0272275	0.0106797	-0.00921813	-0.0328692	-0.0530425	0.00237566	0
214.8	-0.0197933	0.0205127	-0.0409626	0.0229624	0.00666243	0.0206727	-0.00249924	0.00137643	-0.0044173	0.0037892	0
215	0.0149419	0.0046244	0.0142956	-0.00182725	0.00558835	-0.0237993	0.0426276	0.0247491	0.0374065	0.0118004	0
215.2	0.0197122	-0.0272079	0.0863938	0.029456	-0.0266012	-0.0179034	0.00978544	0.000244376	-9.82816e-06	-0.00217346	0
215.4	0.0685099	-0.0211199	0.0819828	0.00380665	-0.0238644	0.035187	0.0146855	-0.0248099	0.0449153	0.0107486	0
215.6	0.0562063	0.0183722	-0.0335725	-0.00915072	0.00882679	0.0123555	0.0249567	0.0133172	0.0478587	0.018655	0
215.8	-0.000202935	0.044822	-0.0631885	0.00153432	0.0195642	-0.014239	-0.0191401	0.0335683	0.015116	0.0115683	0
216	0.016746	0.0156642	0.0411417	-0.0229935	0.00995479	0.0493979	-0.0234149	0.0102573	0.0714606	0.00601412	0
216.2	-0.00992393	-0.0145912	-0.0113434	0.0174242	0.0155489	0.0307404	0.0292424	0.0608442	0.0497719	-0.018894	0
216.4	-0.0451736	0.0676256	0.0205866	-0.0110815	-0.00904833	-0.0209179	-0.017372	-0.0132617	0.0499418	0.0401399	0
216.6	-0.019988	0.0313177	-0.00164098	0.00652394	-0.00667186	0.0173061	0.00182967	-0.0354841	0.00170628	-0.00855276	0
216.8	0.00503744	-0.00294368	-0.0014495	-0.0375874	0.0165349	-0.00215919	0.018698	-0.0125009	-0.0604074	-0.00755768	0
217	-0.0129564	-0.0105459	0.0141687	-0.0560114	0.0119755	-0.0472348	-0.0251751	-0.00285575	-0.0457987	0.0192909	0
217.2	-0.0218826	-0.0514341	0.0075908	-0.00448144	-0.0126297	-0.0205486	-0.0439707	-0.000456719	-0.00380418	-0.01899	0
217.4	0.0105838	-0.0487193	0.0307689	-0.0113968	-0.00777967	-0.00432688	0.000793382	-0.00288973	-0.0233321	-0.0107456	0
217.6	0.0216513	-0.0205666	-0.000177474	0.0400466	0.0110696	-0.00825055	0.0268329	0.00858515	-0.030075	0.00461901	0
217.8	0.011276	0.00604214	-0.000956009	-0.0122718	-0.017422	0.00520598	-0.0131807	0.038047	-0.0315514	-0.0224191	0
218	0.0344976	0.033552	0.0252808	-0.00742969	-0.0030487	0.00818102	0.0126184	-0.0115777	0.0322843	-0.0265366	0
218.2	0.0306011	0.045862	-0.0197485	0.0834914	0.0287958	0.0339493	0.0307725	0.000986416	0.0455362	-0.0131394	0
218.4	0.000989878	0.0538616	-0.0723445	0.0871139	0.00833911	0.0489304	-0.0219997	0.0694124	-0.00962882	-0.00598988	0
218.6	-0.0158073	0.0458868	-0.058699	-0.00762946	-0.0237579	0.0165939	-0.0332247	0.0415741	-0.00466907	0.0188061	0
218.8	-0.0363862	-0.0168112	-0.058914	-0.0127469	-0.00625267	0.00635374	0.032925	-0.0255391	0.0365206	0.0407045	0
219	0.00777683	-0.0508424	-0.014432	0.0360777	-0.00603751	0.010651	0.0229646	-0.0356468	-0.00424532	-0.011684	0
219.2	-0.00807214	-0.0225749	0.0329049	0.0292515	-0.0112263	0.0304328	0.0390268	-0.012153	0.0471077	0.0155371	0
219.4	-0.00303252	0.0342792	0.0139196	-0.0689901	0.00985888	-0.01523	-0.00336848	-0.0555337	0.0040475	0.0186057	0
219.6	0.0125733	0.0324344	-0.000266973	-0.0969001	0.0201473	-0.0664783	-0.0390697	-0.0348648	-0.0210948	-0.00660293	0
219.8	-0.00571909	-0.0209196	0.0187101	-0.0183878	0.00339753	-0.0676909	-0.0060241	0.029063	-0.00176511	-0.0182093	0
220	-0.019589	-0.0361292	0.0264614	-0.00759352	-0.0101593	-0.042797	-0.00568497	-0.0235131	-0.0702807	-0.0255912	0
220.2	-0.0218308	-0.01431	0.0457495	-0.0620292	-0.0229073	0.0209476	-0.0392815	-0.0300818	-0.0324615	0.018055	0
220.4	0.0106597	-0.0104706	-0.00310791	0.0270896	-0.0184928	0.0269814	0.00184492	0.0686296	-0.0305014	0.0189775	0
220.6	0.0381461	-0.0349718	-0.0232744	0.0681814	0.0148988	0.00314133	0.029301	0.062699	-0.0389456	-0.0441266	0
220.8	-0.00328421	-0.0315759	0.0250066	0.0521177	0.0132026	-0.0301772	-0.0128453	0.0337463	-0.0261394	-0.0605818	0
221	-0.0243507	-0.0057408	0.0207152	0.0361144	0.0204649	-0.00734891	-0.00707883	-0.0382014	0.00618074	-0.0323723	0
221.2	0.0024848	0.00338253	-0.0531116	-0.000654816	0.036714	0.0267499	0.00494572	-0.081217	0.0374139	-0.0140292	0
221.4	-0.0152069	-0.0016008	-0.0234292	-0.0276934	-0.0139636	-0.0229233	-0.065645	0.0575591	0.0252593	0.00140359	0
221.6	0.00264255	-0.0129427	0.079887	0.0184183	-0.012894	-0.00995797	0.0475148	0.0433683	-0.025821	-0.0170515	0
221.8	-0.00845928	0.000991151	-0.0440089	-0.00714744	-0.00340452	-0.00725716	0.0572089	-0.00094837	-0.00388941	-0.00534298	0
222	-0.0279177	-7.62389e-05	-0.0474003	-0.0392315	-0.00846913	0.00741136	-0.00306335	-0.0515137	0.0180251	-0.00527408	0
222.2	-0.0105801	0.0541064	-0.0652564	-0.0482217	0.00308282	0.0139436	-0.0499638	-0.0536807	-0.00298189	-0.00720532	0
222.4	-0.00570727	0.0666332	-0.088012	-0.0322459	-0.00203278	-0.000253758	-0.0582083	-0.038095	-0.0181975	0.0199873	0
222.6	-0.0188456	-0.0165942	0.0446682	0.00860835	-0.0219674	-0.0218509	-0.0316755	-0.0309138	0.000303836	0.0363864	0
222.8	0.0260612	0.000167902	0.0465891	0.0204841	0.0135078	-0.0431804	-0.000219728	0.0328769	0.0191552	0.00991427	0
223	0.0125003	-0.0224466	0.0117026	-0.00637984	-0.00150413	0.00891705	0.0515115	-0.000636446	0.016414	0.0183706	0
223.2	-0.0225152	-0.0343653	0.0567633	-0.0774331	0.0261145	0.0257905	0.0162694	0.00306714	-0.0278375	0.0233485	0
223.4	0.0221773	0.00261254	0.086494	-0.0805605	-0.00921622	0.00260681	-0.0235233	0.0148354	0.00144876	0.0173339	0
223.6	0.0274965	-0.0186725	0.0189033	-0.0173865	-0.0229771	-0.026612	-0.0303774	-0.0198572	0.0344665	-0.00236965	0
223.8	-0.01137	-0.0717953	-0.0186756	0.034924	0.0291878	-0.0355163	-0.0220399	-0.0200737	0.00917412	-0.0379023	0
224	0.0262443	-0.0213087	0.0313931	0.0656403	0.0141806	-0.02388	-0.00551185	0.0198402	0.000894638	-0.0642957	0
224.2	0.0152062	0.038276	-0.0310747	0.0661522	-0.0121203	-0.0262099	-0.0128597	-0.0260881	-0.0158969	-0.0582698	0
224.4	0.00887306	0.023883	-0.0726554	-0.0138747	-0.0119105	0.00639185	0.0295631	0.0359855	-0.0303894	-0.0356379	0
224.6	-0.0317376	0.00624968	-0.0970414	-0.037848	-0.00129613	0.0103643	0.0353717	0.0103289	-0.0416504	-0.00994729	0
224.8	-0.0385364	-0.0272583	-0.0982557	-0.0550917	0.0187103	-0.00811382	0.0275405	-0.0455979	-0.0477921	0.0461529	0
225	-0.0263336	-0.0137537	-0.0326117	-0.012056	0.0205106	-0.00323208	0.0125992	-0.02549	-0.012704	0.0533546	0
225.2	-0.0276173	0.0214533	0.0320797	0.0692735	-0.00240346	0.0437972	-0.00776382	0.018549	0.0242592	-0.00912693	0
225.4	0.00241137	-0.0244412	0.0153116	0.025518	-0.0131073	0.0762638	-0.00359664	0.0148332	0.011501	-0.0199309	0
225.6	-0.00866673	0.0349945	0.0369761	0.0575692	-0.0241797	0.00284491	-0.0445281	-0.0399516	0.0569749	-0.00586674	0
225.8	0.0100384	0.0175772	0.0150184	0.0653663	-0.00588573	0.012326	0.00146938	-0.00640352	0.0143017	0.0244208	0
226	0.0248233	0.0448791	0.0684059	-0.0267743	0.0111146	0.0300011	0.0179054	-0.00406111	0.0456181	0.0469706	0
226.2	-0.016454	0.0718357	0.0821635	-0.000823019	0.0130757	0.0214229	0.0190479	0.019831	0.0727227	0.0101061	0
226.4	-0.0268898	0.0226572	-0.0023595	0.03862	0.00648604	0.0446641	0.0274143	0.0329033	0.0164396	-0.0259283	0
226.6	0.0205344	0.00491539	-0.00888404	-0.047381	0.00393788	0.0660782	0.00242052	-0.0142894	-0.00766773	-0.00363648	0
226.8	0.00331	0.0305939	0.0594481	0.0119373	0.0114983	-0.00697722	-0.00568449	0.033973	-0.00471768	-0.00305859	0
227	0.0354138	-0.0740369	-0.0252863	-0.0661005	-0.00685388	-0.0984555	-0.0310652	-0.0221388	-0.0438622	0.00613618	0
227.2	-0.00368798	-0.100858	-0.0646849	-0.0502283	0.0146173	-0.0833975	-0.0482154	-0.0507221	0.00661769	-0.0371675	0
227.4	-0.0326265	-0.00397221	-0.013143	-0.0499704	-0.010376	-0.0541186	-0.0233184	-0.0618734	0.0141295	-0.00320664	0
227.6	-0.00796009	0.00432698	0.0619544	-0.0512934	-0.0482879	-0.0255171	-0.0151488	-0.0707123	-0.0372683	0.0427183	0
227.8	0.012765	-0.0637228	0.0444162	0.0245365	-0.0256528	-0.017319	-0.0386232	-0.0355144	-0.0451	-0.00699711	0
228	0.025793	0.00648281	-0.0543139	0.0723037	0.00316097	-0.0489088	-0.0170702	0.0298481	-0.00859519	-0.0338928	0
228.2	0.046172	0.0782371	0.0119126	0.10129	0.00915097	0.0322704	0.0244411	0.0670767	0.0247859	0.0196174	0
228.4	0.0266825	-0.0124583	0.0747561	0.125144	0.00930518	0.0368761	-0.000704432	0.0333283	-0.0401192	0.00471022	0
228.6	-0.0150219	-0.00569872	-0.00621117	0.0978414	0.0117652	0.0363481	0.0534981	0.018593	0.0150031	0.0252149	0
228.8	0.0297242	0.0356287	0.0313936	-0.0287032	0.00582378	0.0362662	0.0723084	0.0644282	0.0308937	0.0286171	0
229	0.0479543	0.030567	0.00753974	-0.076183	0.0254517	0.0310311	0.0210362	0.0835165	-0.0329614	0.00559934	0
229.2	-0.0302505	0.0357317	-0.147936	-0.000402111	0.0473122	0.0461779	0.00506543	0.0208138	-0.0314756	0.000759131	0
229.4	-0.0217688	0.0108397	-0.0047904	-0.0400844	0.00299307	0.0440336	0.00981777	-0.0191504	-0.0137071	-0.0136554	0
229.6	0.0125552	-0.0290877	0.0304214	-0.0763138	-0.00357639	0.0145028	0.0281917	0.0386627	0.00395652	0.0424214	0
229.8	0.052198	0.0108517	-0.00969762	-0.0333952	-0.00965604	0.00757274	-0.0266794	0.0192658	-0.0415834	0.0345	0
230	-0.00986784	-0.0107077	0.0446458	-0.0625006	-0.0330595	-0.0120397	0.00052187	-0.0358605	0.0557815	0.0489835	0
230.2	-0.035828	-0.00768993	0.0650784	-0.116025	-0.0292335	-0.0428136	-0.00375956	-0.0256192	0.0428137	0.0277883	0
230.4	-0.0110339	0.0277568	-0.00165306	-0.0394528	-0.00663306	-0.0740232	-0.0396509	-0.00242619	-0.0405107	-0.0201646	0
230.6	-0.0201085	-0.0343236	-0.0175097	0.0534782	-0.00145031	-0.0664616	0.0146584	-0.0200618	0.0570025	-0.0145559	0
230.8	0.0542255	-0.0550331	-0.0129467	-0.0214162	0.00448226	0.0190576	-0.0109592	-0.00096576	0.00191835	-0.0502582	0
231	-0.0142935	0.0212974	-0.0459001	0.0494633	-0.0248199	-0.00799554	0.00981052	-0.0127744	-0.0177049	0.00382045	0
231.2	-0.0307412	0.043086	-0.0738022	0.122356	-0.00884761	0.00186963	0.0463556	-0.027077	-0.00402216	-0.011888	0
231.4	-0.000351192	-0.0159354	-0.0226939	0.0780881	0.00358105	0.0379351	0.00948533	-0.0538207	0.0178068	-0.0268139	0
231.6	-0.0197044	-0.0316344	0.0243404	-0.0107098	-0.0181323	0.032412	-0.0382189	-0.0571992	0.0476523	-0.0285425	0
231.8	-0.0322252	0.0104117	0.00493139	-0.0337937	-0.0227314	0.0238035	-0.00534179	0.0113178	0.0262074	-0.034165	0
232	0.0203396	0.0238871	-0.0145762	-0.0184777	0.00230785	0.0297851	0.0643577	0.0648172	-0.0401498	0.0104289	0
232.2	0.0229061	0.0370978	-0.0359962	-0.0617054	0.0132632	-0.00133002	0.0791221	-1.80821e-05	0.00548523	0.0037766	0
232.4	-0.0104762	-0.0517934	-0.00957706	0.00168677	0.0287195	0.0549066	-0.00431272	0.0315159	0.0187003	-0.00834512	0
232.6	-0.0110539	-0.0183775	-0.0138772	0.013162	0.00038503	0.00607549	-0.053386	0.0281124	0.00324988	-0.0227492	0
232.8	-0.0240486	0.0158523	-0.0282697	-0.00157504	-0.0154033	-0.0414691	-0.00367179	0.0111494	-0.0276604	-0.0180929	0
233	-0.0469838	-0.0414872	-0.0168852	0.0213899	-0.0193007	-0.0190584	0.0139219	0.0055556	-0.000199295	0.0012787	0
233.2	-0.0409087	-0.0312039	0.025955	0.0092261	-0.0303774	-0.0455896	-0.0702441	-0.0149553	0.0176112	0.00597281	0
233.4	-0.0316434	0.0437455	0.0572475	-0.0369129	0.00525443	-0.0768015	-0.095999	0.00753687	-0.0897628	0.00419088	0
233.6	0.0208011	0.0124669	-0.0505352	-0.00959847	-0.0060128	-0.0186273	-0.0167535	-0.0120315	0.0258858	0.00867621	0
233.8	0.0399342	0.0143219	0.0664314	0.0165088	-0.00503046	0.0131948	-0.0211386	-0.0329928	-0.0188618	0.0196507	0
234	0.0137417	-0.035289	0.0965054	0.0530553	-0.0117184	-0.0247711	-0.0528263	-0.0225633	-0.0305384	0.00497896	0
234.2	-0.00850893	-0.0214753	0.0348394	0.0240453	0.00321101	-0.0371958	-0.0626391	-0.00990409	-0.000618886	0.0144705	0
234.4	0.0200082	0.0569891	0.070881	-0.020252	0.0402154	0.00159929	0.000646643	0.00219098	0.00708931	0.0488994	0
234.6	0.044611	0.0174532	0.0590664	0.0303321	0.0384357	0.0309533	0.109897	0.0162656	0.0593924	0.0471995	0
234.8	-0.00596135	0.00114243	-0.050379	0.0305019	0.020205	0.0571187	0.0763728	-0.00138661	0.0162901	0.0331295	0
235	0.0650567	0.0574179	0.0328997	0.0187525	0.00458726	0.0481699	0.0824734	0.0479178	0.032587	-0.00727628	0
235.2	0.0631162	-0.0193098	-0.0074821	-0.00553519	0.000558355	0.071638	0.0364249	0.118662	0.0446425	0.0196077	0
235.4	-0.00270528	-0.0233328	-0.0795858	-0.00603033	-0.0137686	0.0583306	0.0545213	0.0788131	-0.0134802	-0.00470532	0
235.6	-0.0284302	0.0156109	-0.0540749	0.00125708	0.00039516	0.00931303	0.0642412	-0.0268006	-0.0549547	-0.0296884	0
235.8	-0.0159998	-0.00177265	-0.0083929	-0.0218144	0.0254985	-0.00958832	-0.0377427	-0.0500418	-0.00403005	0.00228559	0
236	0.00265141	0.0506063	-0.00330588	-0.0330384	-0.00418946	-0.0103681	-0.0717033	-0.0130349	0.059201	-0.0222842	0
236.2	0.0152301	-0.00921621	-0.0586109	0.00482514	0.0105113	0.000970399	-0.0215632	-0.0333734	0.0403853	0.00579539	0
236.4	-0.0152753	-0.0328031	0.0128996	-0.000954401	0.0170089	-0.00264868	-0.0236134	0.049048	-0.0140941	0.0224965	0
236.6	-0.00897933	0.0159519	-0.00146973	-0.0313478	-0.00334288	0.0132795	-0.00656461	0.0182175	-0.0530688	0.0163406	0
236.8	0.00305478	-0.000800996	-0.0149022	-0.0227554	-0.0186175	-0.00569574	0.0165071	-0.059017	-0.0495437	-0.0030215	0
237	-0.0184837	-0.0350075	0.0143577	0.0206256	-0.0021226	-0.0143898	0.0073287	-0.0411573	-0.0126271	-0.00655249	0
237.2	-0.00946673	-0.00708188	-0.0157228	0.0468646	0.01547	0.0230775	-0.0103531	0.00371201	0.0143494	-0.00413957	0
237.4	0.026727	-0.0295234	-0.000267783	0.0148222	-0.00627486	-0.0223247	-0.0166211	0.0155082	0.00520892	-0.0290862	0
237.6	-0.0476965	0.0326506	-0.000278179	-0.0682238	-0.00839461	-0.0437725	0.0222544	0.0127107	0.0015853	0.0103993	0
237.8	-0.0351248	0.0888181	-0.0356899	0.0167192	-0.00922435	0.00060986	-0.016328	0.0685951	0.0253977	-0.0308041	0
238	0.022252	0.0113437	-0.0325509	0.0400473	0.00463893	-0.0416343	-0.00793874	-0.00276711	0.00809676	-0.00602773	0
238.2	-0.0105542	-0.0533343	-0.0129755	0.0119324	0.0200389	-0.0392044	0.0226244	-0.0795226	-0.00109204	0.0371558	0
238.4	-0.0538202	-0.0384918	0.0201212	0.027919	0.00270877	0.0251147	-0.0147982	-0.0195182	0.0262252	-0.0102614	0
238.6	-0.0154491	-0.0636838	0.0474528	-0.0195284	-0.0244742	-0.0279125	-0.0303814	0.00722964	0.0173253	-0.0299499	0
238.8	-0.0378043	-0.0631365	-0.0501497	-0.0588013	-0.0134274	-0.023963	0.0160118	-0.0383458	-0.00555592	0.00881853	0
239	-0.0267541	-0.0499699	-0.00108304	-0.0210199	-0.0179691	0.00128522	-0.0207013	-0.00566024	-0.0255242	-0.0357598	0
239.2	-0.0153765	0.00183991	0.0070665	0.0279898	-0.0053174	-0.00604259	-0.0352444	0.00372319	-0.042039	-0.0389227	0
239.4	-0.0160336	-0.0148254	-0.0814987	-0.0139316	0.015887	-0.0289993	-0.0128165	-0.0561926	-0.0235534	-0.0133885	0
239.6	-0.0128729	-0.0303597	-0.0259946	-0.0479901	0.0171847	-0.0401607	-0.0176224	-0.0738284	-0.00674026	-0.0232764	0
239.8	-0.00885283	0.000448323	0.0835987	0.00243726	0.00318161	-0.0250939	-0.040511	-0.0298844	-0.0207913	-0.0381267	0
240	-0.00840012	-0.0246698	-0.0445084	-0.00955341	0.000433435	-0.00245818	-0.0356106	-0.0281048	-0.0304749	-0.0224078	0
240.2	-0.00536308	0.0599616	-0.0378352	-0.084789	0.0171344	-0.027016	-0.0304269	-0.0179939	-0.06514	0.000195216	0
240.4	0.00437963	0.00672049	-0.0707757	-0.0349842	-0.0114508	0.00923492	-0.0319496	-0.0443276	-0.0447644	0.017582	0
240.6	0.0176884	0.013133	0.00790598	-0.0131693	-0.0199959	0.0382299	0.0334991	-0.0120179	-0.0336329	-0.0120163	0
240.8	0.0459032	0.0557687	0.0549514	0.0294679	0.00125983	0.0351458	0.0581978	0.0301573	0.0180518	0.0268007	0
241	0.0457444	0.0493341	0.000391208	0.0905216	0.00152188	0.0397517	0.0183175	0.0461599	0.0633574	0.0516449	0
241.2	0.0344685	0.062062	0.0324974	0.045512	-0.0226383	0.0481087	0.0194574	0.0814963	-0.00344998	-0.0441684	0
241.4	0.0873372	0.043912	0.070395	0.0164338	-0.0381546	0.0464556	0.0380372	0.0741613	-0.00194106	-0.0288843	0
241.6	0.0116663	-0.00334105	-0.00116614	0.0424203	-0.0383545	0.0583462	0.0756957	0.0262866	0.177709	0.00986402	0
241.8	0.0249376	0.0314441	0.0207856	0.0293142	0.0207945	0.00472992	0.0159887	0.0878878	0.107185	0.00606322	0
242	0.0135996	0.0211499	0.066989	0.019286	0.0308484	0.00888869	0.00898993	0.0533248	0.00195848	0.0397364	0
242.2	-0.0176872	-0.0317229	0.0497171	0.0231708	0.00273763	0.0466897	0.0209366	-0.0186776	0.00127542	0.0427253	0
242.4	0.0175163	-0.013822	-0.00829944	0.00373408	0.00360667	0.00129025	0.00672345	-0.00907313	0.00232132	-0.0103346	0
242.6	0.0199357	0.0245356	-0.0384856	-0.00442639	-0.00846377	-0.0548589	0.0552317	-0.0139665	0.00886141	-0.00019756	0
242.8	-0.0137079	-0.00806743	0.0286353	0.0252077	-0.0273563	-0.0204556	0.023484	0.0298528	-0.0167481	0.0203347	0
243	-0.00333768	-0.0170628	-0.0158641	-0.011727	0.0198885	-0.0241788	-0.0292827	-0.0366942	-0.0499697	0.0403934	0
243.2	0.0316905	-0.0227257	-0.0200708	-0.029029	0.020192	-0.034901	-0.0644352	-0.0414011	-0.0168834	0.0491346	0
243.4	0.0286383	0.0122169	-0.0505298	-0.0165134	0.0018992	-0.000331809	-0.0248662	-0.0429704	-0.00679113	0.0438076	0
243.6	-0.00356128	0.0212676	-0.0227959	-0.00630945	0.00135091	0.0291866	0.0319944	-0.0296843	-0.0271662	0.0290173	0
243.8	-0.0440268	-0.0275106	0.0622098	-0.0137851	-0.00148686	0.00896036	0.0256753	0.0274759	-0.020621	0.00180739	0
244	-0.06282	-0.0129541	-0.0306511	-0.0426773	0.0103866	-0.013852	-0.00162478	-0.0185794	-0.021596	-0.02019	0
244.2	0.0424357	-0.0272383	0.0480495	-0.0264962	-0.00105022	-0.0184388	-0.0464692	-0.00940786	0.0138554	0.0102751	0
244.4	-0.0130776	-0.025858	-0.0565186	-0.0239335	-0.0151167	-0.01492	-0.059246	-0.00863331	0.00554538	0.00607463	0
244.6	-0.0436704	-0.0508822	-0.102937	-0.0116986	0.0384874	-0.0399837	-0.0433606	-0.0598938	0.00277096	0.00736698	0
244.8	-0.0277918	-0.0476766	0.0024202	0.026693	0.0540993	-0.0366457	-0.0345359	-0.0495866	0.0143401	0.00786494	0
245	-0.0462234	-0.015079	0.0228695	0.020404	-0.000672497	-0.0106823	-0.0339428	0.0321384	-0.0181119	-0.0375357	0
245.2	-0.0577282	-0.0322085	-0.0488008	-0.0238	-0.0135104	-0.0271648	-0.0245457	0.0520256	-0.0595328	-0.0665709	0
245.4	-0.0729045	-0.0299175	0.00870424	0.0115664	-0.00296939	-0.0194492	-0.0126097	0.0179193	-0.00536638	0.00256956	0
245.6	0.00425152	0.0268838	0.0446989	0.00384727	-0.00529095	0.0287754	0.0228182	0.0298748	0.0571324	0.0318579	0
245.8	0.0261396	0.0330597	0.0496719	0.0285134	-0.0128098	0.00907283	0.0650643	0.0133909	0.056329	-0.0133609	0
246	0.050165	0.0868691	0.069784	-0.00262218	-0.0051966	0.0353885	0.0646071	0.0126976	-0.025361	-0.0228444	0
246.2	0.0409447	0.053141	0.0472116	-0.0636812	-0.0070667	0.0539769	0.01168	0.0313354	-0.0770259	-0.0431167	0
246.4	-0.0158559	-0.0417963	-0.0216633	-0.0467733	-0.0242971	0.000904286	-0.0321111	-0.0113244	-0.0299663	-0.074617	0
246.6	0.0167525	0.0541622	-0.0441122	0.0132581	-0.0179893	-0.00276459	-0.0194996	-0.0599744	0.0197992	0.00125915	0
246.8	0.0511055	0.0337685	-0.0589493	0.0729057	0.00241784	-0.0184711	-0.00272915	0.0432552	0.0101037	0.0436038	0
247	0.0386439	0.00377185	-0.0626978	0.0982846	0.0249097	-0.00709808	-0.0090265	0.0681189	-0.000145886	0.0491413	0

## Sheet: fly2
Time	gamma-L5	gamma-L4	gamma-L3	gamma-L2	alpha-L	gamma-R5	gamma-R4	gamma-R3	gamma-R2	alpha-R	stimulus			Time	gamma-5	gamma-4	gamma-3	gamma-2	alpha	stimulus
0											0			0	-0.020614	-0.0167215	-0.0140434	0.00362505	0.0318268	0
0.2											0			0.2	-0.00229658	-0.00815522	0.0196777	-0.00612877	0.0247561	0
0.4											0			0.4	0.0284053	0.00733936	0.00440414	-0.00360719	0.0064923	0
0.6											0			0.6	0.0532542	0.081344	0.00449236	0.000747153	-0.0321034	0
0.8											0			0.8	0.0203488	0.0327083	-0.00850928	0.00256406	-0.0376442	0
1											0			1	0.00368666	-0.00902936	0.00104279	-0.0156637	-0.0114216	0
1.2											0			1.2	-0.0280051	-0.0245514	0.0298478	-0.00333896	0.0116177	0
1.4											0			1.4	-0.0406408	-0.0450185	0.00274513	0.0148249	0.036472	0
1.6											0			1.6	-0.0247461	-0.0387345	0.0134902	-0.009514	0.040692	0
1.8											0			1.8	-0.0249466	-0.00805825	0.028389	0.0116275	0.0109239	0
2											0			2	-0.0143099	0.0028544	0.0266887	0.00851267	0.0158461	0
2.2	0.108614	0.0194884	0.0165309	0.0257545	0.035803	-0.0544289	0.0255838	0.0749069	0.0498544	-0.00672358	0			2.2	0.0330426	0.0301745	-0.0172766	0.0143591	-0.00140747	0
2.4	0.0585717	0.00712288	0.0426357	0.0603031	0.0394574	0.0157825	0.00740702	0.0493706	0.0678929	0.013035	0			2.4	0.0564593	0.0547379	-0.0397621	0.0271068	-0.0278829	0
2.6	0.0153266	-0.00293948	-0.01602	0.0252081	-0.00340781	0.0978377	0.0519217	-0.0344502	0.0202943	-0.0020584	0			2.6	0.0638019	0.0508711	-0.0116664	0.0132409	-0.0509777	0
2.8	0.0136033	-0.0414597	-0.0184157	-0.0310594	-0.0201425	-0.0261264	0.0211564	-0.00385575	0.0140595	0.00892843	0			2.8	0.0837049	0.070391	-0.00460966	0.0190192	-0.0593066	0
3	-0.0265657	0.015462	0.0260362	-0.0158767	0.0569364	-0.0214158	-0.0620467	0.0106655	-0.0112834	-0.00776985	0			3	0.0715341	0.062934	0.0137208	0.0279442	-0.0463926	0
3.2	-0.0647671	0.0214825	0.0162189	-0.0516945	0.0163957	0.0326855	-0.0757734	0.0493282	-0.0396891	-0.0146848	0			3.2	0.0756919	0.0557259	0.0221033	0.00160737	-0.0404501	0
3.4	-0.0405087	-0.0287899	0.0155974	-0.0350659	-0.0427198	-0.00996965	-0.0262662	0.0185025	0.00402361	0.00424147	0			3.4	0.0306566	0.0299127	0.000930118	0.00183728	-0.0133265	0
3.6	0.00887209	-0.0431143	0.0454956	0.0156574	-0.00973064	-0.0299776	0.0136562	-0.0785592	0.0248824	0.00803988	0			3.6	0.000125202	0.00179474	-0.00516006	0.00615702	0.000746136	0
3.8	0.00444553	-0.00884059	0.0408109	-0.0182989	0.0143782	0.0146187	0.0129273	-0.0758524	-0.0235288	-0.00826142	0			3.8	-0.0169352	0.0057326	-0.00595842	0.00479288	-0.00383702	0
4	-0.0208388	0.0286554	0.0315425	-0.0118614	-0.00454056	-0.0430545	-0.0158362	0.00326144	0.0124683	0.00034505	0			4	-0.025215	-0.00251804	0.0067046	-0.00926098	-0.0121351	0
4.2	0.0382887	0.0096517	0.0250826	0.00472124	-0.0275651	-0.0189726	-0.0143248	-0.01729	-0.00182137	0.0103728	0			4.2	-0.0341491	-0.0244361	0.00169529	-0.01195	0.00988311	0
4.4	0.00465557	0.0451619	-0.00159773	0.0036768	-0.00593546	0.00858952	0.0333819	-0.0373221	-0.0305549	0.00538611	0			4.4	-0.0390508	-0.0392151	-0.0130724	-0.0064768	0.0140399	0
4.6	0.0546975	0.00661867	0.0354592	0.0295935	0.0232534	0.0312159	0.0114329	-0.0129953	-0.0260784	0.0099337	0			4.6	-0.0275657	-0.0297345	-0.0159965	-0.0163094	0.0278453	0
4.8	0.0822839	0.0325798	0.0660802	0.0269796	0.0213928	0.0611275	0.00180738	0.0285963	0.0366213	0.0187154	0			4.8	-0.0435183	-0.0561094	0.00430482	-0.0182301	0.0310621	0
5	0.0106603	0.115011	0.0308373	0.0354063	-0.00685836	0.0668287	0.025903	0.0398301	0.0719565	0.0134047	0			5	-0.0286999	-0.0519116	-0.000589662	-0.00880722	0.0135444	0
5.2	0.0282034	0.0413427	0.0202828	0.110969	-0.00944493	0.043998	-0.000573231	0.0297483	0.0269554	0.00305665	0			5.2	0.0038749	-0.0119468	-0.00360576	0.00812269	0.0115765	0
5.4	0.023936	0.0175996	0.0255419	0.0622765	0.0410298	0.0139604	0.0414828	0.0602264	0.0402261	-0.000807611	0			5.4	-0.00426128	-0.0228781	0.0310049	0.00094807	0.00995313	0
5.6	-0.0589152	-0.0377373	-0.024987	0.00794658	0.0114	-0.0654213	-0.0059549	0.00684688	0.0105206	0.00143309	0			5.6	-0.0349765	-0.0424728	0.00917333	-0.0167912	0.00988876	0
5.8	-0.0663199	-0.0752533	0.0147415	0.00574939	0.062624	-0.0655553	-0.11206	-0.0300132	-0.0218194	0.00781452	0			5.8	-0.035498	-0.0309059	0.000252717	-0.00942168	0.031172	0
6	-0.0262583	-0.0393662	-0.00726531	-0.0276641	0.0595366	-0.024381	-0.0283128	0.0281745	0.00572433	-0.00951251	0			6	-0.0273692	-0.0154389	0.0105669	-0.0129073	0.0303206	0
6.2	-0.00280782	-0.0305077	-0.0510025	-0.0631499	-0.0024602	-0.0480914	0.0525558	0.0474115	0.016247	0.00972669	0			6.2	-0.0392786	-0.0226413	-0.0030079	-0.00211137	0.0150171	0
6.4	-0.0320981	-0.0738145	-0.00757022	-0.0424654	-0.0103604	-0.0841248	-0.044707	-0.0304671	-0.0221657	0.0805317	0			6.4	-0.0237763	-0.0224387	-0.0344012	-0.00715633	0.00338674	0
6.6	-0.081105	-0.0275722	-0.0132928	-0.0254446	-0.0407239	-0.0406012	-0.0151665	-0.027354	-0.0123144	0.0586101	0			6.6	0.00142426	0.00387705	-0.0473622	-0.00925396	-0.0219522	0
6.8	0.0372557	0.0522487	-0.00608936	-0.00756159	-0.0512037	0.00418821	0.0978338	0.056726	0.00207492	-0.0688099	0			6.8	-0.00183767	0.0226995	-0.0371525	-0.0143601	-0.0273647	0
7	0.0282138	0.0360919	-0.0823831	-0.0116764	-0.0359398	0.13466	0.103422	-0.00955362	-0.0102779	-0.0601553	0			7	-0.0032972	-0.0170423	0.000752792	-0.0214176	-0.0149271	0
7.2	0.0414168	0.0619062	-0.0513544	0.000944016	-0.0370378	0.130869	0.0604448	0.0246467	0.00890945	-0.0445364	0			7.2	-0.00214029	-0.0154911	-0.000522277	-0.0126252	0.000477632	0
7.4	0.0596222	0.0834152	0.0169237	0.0153926	-0.0273022	0.0742085	0.036631	0.0534607	0.0514347	-0.0445037	0			7.4	0.00931296	0.0276846	-0.0124576	-0.0102559	-0.00409286	0
7.6	0.0464829	0.0615478	0.0333176	0.0181246	-0.00112885	0.0577365	0.0326648	0.00374668	0.0523932	-0.000739159	0			7.6	0.0287259	0.0442424	0.00747469	-0.0102872	0.00945663	0
7.8	0.0561938	0.0498633	0.0516315	0.0221857	0.0094349	0.034179	0.0187619	0.0136528	-0.00129023	0.0161755	0			7.8	0.02908	0.0517147	0.0367043	0.00800821	0.00789944	0
8	-0.0091994	-0.0208155	0.0202995	0.0102222	0.0100789	0.0438641	-0.0403089	-0.0286873	-0.0367014	-0.0182128	0			8	0.0378954	0.040021	0.016639	0.0268672	-0.0142401	0
8.2	-0.0454439	-0.0706278	0.00177742	0.0007093	-0.0217768	-0.0890855	-0.0799769	-0.0638855	0.00672029	0.0323755	0			8.2	0.054291	0.0531819	0.00943014	0.0243133	-0.0152144	0
8.4	-0.0304807	0.00882657	0.00505574	-0.000358302	0.0128683	-0.0693069	-0.0699369	-0.0166289	-0.0120194	0.00493151	0			8.4	0.0627153	0.0857658	0.0353912	0.0166117	0.00452417	0
8.6	-0.02525	-0.0154708	0.0376384	0.0223023	0.03341	-0.0425713	-0.10305	0.0135018	0.00130846	-0.0148994	0			8.6	0.0939986	0.0994707	0.0452249	0.0155151	-0.0130706	0
8.8	-0.0266953	-0.0849019	0.0220295	0.0123263	0.0348466	-0.0736338	-0.0710483	-0.0330283	0.00569458	-0.00325115	0			8.8	0.0997165	0.07562	0.0168775	0.0282024	-0.0332515	0
9	-0.00531681	-0.0625738	-0.0291187	-0.0427312	0.0298964	-0.0850024	-0.0140129	-0.0450983	-0.0343182	-0.00515425	0			9	0.0851652	0.0778381	0.0113534	0.0485741	-0.0216522	0
9.2	-0.0242564	-0.0727921	-0.011231	-0.0469034	-0.0108528	-0.101535	-0.0803654	0.0193595	-0.0428482	0.0116505	0			9.2	0.0584438	0.0643923	0.0401723	0.0388812	-0.000747618	0
9.4	-0.12596	-0.092893	-0.00350021	-0.00539313	0.00529691	-0.0682895	-0.0170376	-0.0166487	-0.0971434	0.0058086	0			9.4	0.0154971	0.0321525	0.0502389	0.0246893	0.0138961	0
9.6	-0.0874672	-0.0448242	-0.0383168	-0.0666126	-0.0195895	-0.0385895	-0.0148706	-0.0615593	0.0159499	-0.0105847	0			9.6	0.0324637	0.0332038	0.0226043	0.0365747	0.0298203	0
9.8	0.0139617	-0.000212927	-0.0556199	-0.0176609	-0.0534082	-0.000310641	0.0579136	-0.00702216	0.0135084	-0.0404014	0			9.8	0.0625215	0.0166946	0.0419851	0.0303034	0.0107538	0
10	0.0693324	0.0142184	-0.035333	0.0206226	-0.0475681	0.125811	0.102351	0.00529725	-0.00148797	-0.0190783	0			10	0.0778072	0.0359887	0.0189814	0.0435293	0.00253322	1
10.2	0.0219896	0.0510216	-0.0380917	-0.00557477	-0.045836	0.149393	0.0849521	0.0286531	0.0178995	0.0122805	0			10.2	0.0892113	0.0869041	0.0984753	0.0914202	0.0380755	1
10.4	-0.0559442	0.059045	-0.0487088	0.00561529	-0.0435446	0.0109476	0.049391	0.0896571	-0.0267972	0.0223285	0			10.4	0.106346	0.126035	0.145396	0.11715	0.0324654	1
10.6	-0.0219996	-0.0367346	-0.00460926	-0.00770577	0.00793741	0.0105597	-0.0617845	-0.00780492	-0.016924	0.0669899	0			10.6	0.146314	0.175827	0.117698	0.124957	0.0112439	1
10.8	0.00933368	-0.0449416	-0.0287018	-0.0124756	-0.00503036	0.0213931	-0.0451129	-0.0195069	-0.00565164	0.0219748	0			10.8	0.158237	0.214861	0.142142	0.131775	0.0124943	1
11	-0.0447126	-0.0287348	-0.0142369	-0.0164611	0.0675629	-0.0262923	-0.00105439	-0.0162811	-0.0204227	0.0386148	0			11	0.132685	0.186847	0.12451	0.151383	0.0234506	1
11.2	-0.0113303	-0.00425829	-0.0110404	-0.0205758	0.0717622	-0.048341	0.00403806	-0.00198683	0.0292318	0.0188678	0			11.2	0.131087	0.171769	0.0885808	0.107192	0.01339	1
11.4	0.0419702	-0.00591324	-0.00812931	0.00231372	-0.00216779	0.00736723	0.0405647	-0.0148969	0.0193002	0.0102815	0			11.4	0.1422	0.20182	0.0716249	0.0719446	0.0086764	1
11.6	0.0325626	0.0214412	0.0174658	0.0108431	-0.0318356	0.0555648	0.0504985	-0.0174661	-0.0296814	0.00168873	0			11.6	0.0734365	0.125567	0.066062	0.0815682	0.00631381	1
11.8	0.0276044	0.0771269	0.0225445	-0.0178527	-0.00353269	0.0282385	0.0111556	0.00986341	0.0169197	-0.0685284	0			11.8	-0.00229882	0.0362874	0.0743238	0.0650165	0.0196415	1
12	0.00147373	-0.00862288	0.0201199	0.00150844	0.0323707	-0.00452774	0.0698142	-0.0453443	-0.00671139	-0.0327114	0			12	-0.0298687	0.0416411	0.061832	0.0234202	0.0204893	1
12.2	0.0151813	-0.0120132	0.0162908	-0.00765921	0.0136668	-0.0438745	-0.0750652	0.0271536	-0.048512	-0.0379555	0			12.2	-0.0201123	0.0191246	0.0372021	0.021358	0.000506336	1
12.4	0.00437988	0.0190036	-0.00709784	-0.0230655	0.0173464	-0.0298324	-0.100498	-0.000363006	-0.0361577	-0.0181582	0			12.4	-0.004949	0.0121287	0.0363865	0.0166406	-0.04064	1
12.6	0.021957	0.0103845	0.00385159	0.0415231	0.00593109	-0.0226087	0.00330325	-0.0136354	0.0439418	0.0152279	0			12.6	-0.0256906	0.0205429	0.013387	-0.00555455	-0.0304824	1
12.8	-0.0138504	-0.020338	0.0198382	0.0591065	0.0146056	-0.036885	0.0616349	0.0191461	0.0512866	-0.00487725	0			12.8	-0.00264788	0.0174541	0.0209042	0.0298683	-0.0106095	1
13	-0.0539364	-0.00705506	-0.00157369	0.00163303	0.0179069	0.000298084	0.039739	-0.0126737	-0.0108218	-0.0492149	0			13	-0.00987405	0.00886997	0.0222729	0.0222413	-0.0147352	0
13.2	0.0547261	0.0446934	-0.00653585	0.0191096	-0.061544	0.0493058	0.000333257	-0.0224808	0.017914	-0.044663	0			13.2	-0.0323347	0.0262886	0.00965636	0.0194674	-0.0234797	0
13.4	0.045851	0.0241354	0.013578	-0.0122488	-0.0498896	-0.00818628	-0.00744904	0.0530042	0.02216	-0.0156527	0			13.4	-0.0266718	0.0124067	0.0257366	0.0152418	-0.002545	0
13.6	0.056124	0.00215922	0.0126115	-0.00375876	-0.0686249	0.0475945	-0.0218448	0.0136267	-0.00644559	0.0148293	0			13.6	-0.0130172	0.0456174	0.0428622	0.0375925	0.00973722	0
13.8	0.0538472	0.0244288	0.0338912	0.0453096	-0.0370482	0.0558386	-0.00247059	-0.00833573	0.025053	0.0159881	0			13.8	-0.0138362	0.0434499	0.057108	0.0379243	0.0246378	0
14	0.0674468	0.0442426	0.00321564	0.0490957	-0.00637397	0.0146506	0.0166646	0.0134732	0.0291081	-0.0144152	0			14	-0.0292858	-0.0112891	0.0528975	0.0191891	0.0197307	0
14.2	0.0363698	0.0464253	-0.0184691	-0.0143463	0.00139317	0.00920051	-0.0105093	0.036848	0.0117905	-0.0174909	0			14.2	-0.013877	-0.0103533	0.0466365	0.0110585	0.00690949	0
14.4	-0.0274905	0.0473423	0.0363612	-0.046563	0.0193718	0.0390401	-0.0176961	0.0649006	0.0252058	0.00607321	0			14.4	-0.0348214	-0.0296008	0.0255469	0.00482637	0.03036	0
14.6	0.0496122	0.0466433	0.0214454	0.0230176	-0.0119894	0.0899001	0.0556694	0.0607654	-0.00247589	-0.0087534	0			14.6	-0.0537723	-0.0474937	0.00724523	-0.000435279	0.063642	0
14.8	0.0281093	0.0832218	0.0112327	0.0593429	-0.011346	0.0757596	0.071453	0.0202902	0.0531905	0.0246476	0			14.8	-0.0645944	-0.0474174	0.0298856	0.0109728	0.0599195	0
15	-0.0254322	0.0322965	0.0275342	-0.0164604	0.0343625	0.0411908	0.0169161	-0.0212465	0.0480444	0.0379605	0			15	-0.0684289	-0.0365797	0.0378421	0.00569161	0.0431415	0
15.2	-0.0204131	0.000728726	0.0088968	-0.00847895	0.0632489	-0.0030412	0.00805018	-0.00816873	0.034424	0.0484796	0			15.2	-0.0472974	-0.0599659	0.00530696	-0.0128472	0.0271831	0
15.4	-0.0174549	-0.0185557	-0.0243136	0.0178959	0.0342936	-0.0303871	0.00838769	0.0201712	-0.0131511	-0.00475505	0			15.4	-0.0778051	-0.0679142	-0.0149924	-0.00595757	0.0102219	0
15.6	-0.0784053	-0.0788149	-0.0402168	-0.0150751	0.0119214	-0.075974	-0.0564919	0.0013863	-0.0560516	-0.0370241	0			15.6	-0.0460155	-0.00755054	0.00750336	0.00431699	-0.0147015	0
15.8	-0.111684	-0.112283	-0.0315387	-0.00195048	0.0209988	-0.142522	-0.0908981	-0.0376339	-0.0106807	0.0471239	0			15.8	-0.00987607	0.0163859	-0.00994148	-0.00774541	-0.0225492	0
16	-0.0328291	-0.103603	0.0243659	-0.00228258	-0.0290729	-0.0807441	0.00528867	-0.0513389	-0.0476164	0.0123827	0			16	-0.0151906	0.0171455	-0.00235437	-0.00393192	-0.00633802	0
16.2	-0.0273494	-0.0847866	0.00233627	-0.0206298	0.00210715	-0.000540027	0.0569231	-0.0830092	-0.098713	-0.0175045	0			16.2	0.0181278	0.0534777	0.00546976	-0.000980771	-0.0252139	0
16.4	-0.00991634	-0.0302627	0.0176711	0.00657352	0.0102571	0.0221704	-0.0227028	-0.0331025	-0.0225455	0.017088	0			16.4	0.0369825	0.0428847	0.00952023	-0.00734508	-0.0186041	0
16.6	0.0391148	0.0288244	0.0096968	0.0195055	-0.0225976	-0.0118305	-0.0145014	0.0369696	-0.0029392	0.00569116	0			16.6	0.0323101	0.0138069	0.0201667	0.0102706	-0.0253557	0
16.8	0.0190585	0.0125708	-0.0114098	-0.00264789	-0.00923458	-0.0130292	0.0329897	0.0149404	-0.00759706	-0.00773449	0			16.8	0.0114815	0.0118511	0.00695808	0.0257006	-0.0182844	0
17	-0.0156344	-0.00504818	0.00299011	-0.0280141	0.025761	0.0196324	-0.008459	-0.0528497	0.0377605	0.0263167	0			17	-0.00769798	0.00258299	0.00591419	0.00108362	0.0087759	0
17.2	0.0304133	0.0425229	-0.0244426	-0.0639457	-0.00218889	-0.015725	-0.0192748	-0.0353414	-0.00902609	0.00476675	0			17.2	-0.0271346	-0.019224	0.0224915	0.00476227	0.0124193	0
17.4	-0.0366658	-0.071077	-0.0430707	-0.0760906	0.00971824	-0.0471801	-0.0437197	0.040289	-0.00366829	-0.00653253	0			17.4	-0.0238006	-0.034362	0.017012	0.0144086	0.021867	0
17.6	-0.0424339	-0.0679238	-0.00685661	-0.0367536	0.0810625	-0.022182	-0.0130258	0.0273376	-0.00281539	0.0131733	0			17.6	-0.0262655	-0.0385222	0.0213213	0.00967581	0.0395755	0
17.8	-0.0467184	0.00218609	0.00734249	-0.00875246	0.0338274	-0.00838602	-0.0463617	0.0159256	-0.0200622	0.0204104	0			17.8	-0.0181945	-0.0250286	0.00312249	0.00593389	0.00882215	0
18	-0.0779449	-0.0193923	-0.0123903	0.0160949	0.0276577	-0.042098	-0.0747324	-0.0203508	-0.0354677	0.0259894	0			18	-0.0121106	-0.00947543	-0.0202045	-0.00513103	-0.00766574	0
18.2	-0.0567868	-0.0784624	-0.00411681	0.00213717	0.0394113	-0.0634642	-0.0449582	-0.0544551	-0.0328607	0.0156231	0			18.2	0.00787311	0.0119142	-0.0154341	-0.00202803	0.000747953	0
18.4	0.00806008	-0.0425831	0.00451217	-0.0210884	-0.0542232	-0.00819669	-0.0385632	-0.00943822	-0.00458186	-0.0182981	0			18.4	0.0370003	0.0446227	0.0302818	0.00278563	0.0114728	0
18.6	0.00940056	0.0331845	-0.0397735	0.0668636	-0.0166592	0.0645546	-0.0388467	0.00538835	0.0146383	-0.00973246	0			18.6	0.0437557	0.0513052	0.0195265	0.00185554	0.0011386	0
18.8	-0.0306927	0.0147812	0.0221662	0.0277606	0.00385883	0.0156879	-0.0229668	-0.0170859	-0.0355065	-0.00304795	0			18.8	0.0460599	0.0327449	0.0146188	0.00307958	-0.00808894	0
19	-0.0320801	-0.0327413	0.0294102	0.00719801	-0.013374	-0.0527634	-0.0496224	-0.0152389	-0.0336183	-0.00460443	0			19	0.032651	0.0189396	0.000825325	-0.00425519	-0.0085294	0
19.2	0.0719432	0.0106935	0.0532133	0.000548521	-0.0173482	-0.0709338	0.0311703	0.0178352	-0.00620496	0.00450879	0			19.2	0.0412429	0.0193719	-0.00672778	0.0127095	0.00323228	0
19.4	0.0604353	0.0583206	0.0229636	0.00203128	0.0132149	-0.0154263	0.0930072	0.0583641	0.0607678	0.0194239	0			19.4	0.0116378	0.0123352	0.00397682	0.0244907	-0.00132651	0
19.6	-0.0195519	0.0173057	-0.0217159	0.0290854	0.0277559	0.031299	0.0581737	0.0570942	0.0858637	0.00119281	0			19.6	0.00363699	0.00427999	-0.0143534	0.00451103	-0.00447407	0
19.8	0.0693112	-0.00798748	0.0595823	0.0334517	-0.00654042	0.0201204	0.0563809	0.0222518	-0.00484166	-0.0387055	0			19.8	-0.00434099	-0.0139938	-0.0178325	-0.0041298	0.0246234	0
20	0.0393731	0.0619688	0.0147686	0.0245509	-0.0199001	0.0732125	-0.0130536	0.050143	0.0218529	-0.0231357	0			20	-0.0228245	-0.0174425	-0.0181369	-0.00721381	0.0290085	0
20.2	0.0286196	0.101331	0.00262522	0.0407876	-0.022127	0.0168121	0.0342701	0.0346241	0.0256891	-0.022659	0
20.4	0.0247981	0.0397623	0.0331726	-0.00197934	-0.0396332	0.0398048	0.0360943	0.00761509	0.00780792	-0.00895566	0
20.6	0.0451583	0.0718781	0.0482643	-0.0325826	-0.0424087	0.0927797	0.0204667	0.0186487	0.0344961	0.0193654	0
20.8	0.0676807	0.124119	0.0221659	-0.00671369	-0.0123963	0.0912816	0.0733512	0.00209251	0.0646099	0.00933409	0
21	0.0498104	0.0478907	-0.0267924	0.00865111	-0.00105123	0.0746559	0.0752215	-0.0333563	0.0419945	-0.00444737	0
21.2	0.0269378	-0.0052035	-0.0491566	-0.00472916	-0.029292	0.0432278	-0.033357	-0.005256	0.00534068	0.0397413	0
21.4	0.000539199	-0.0488901	-0.021329	-0.0134633	-0.00184016	0.00941437	-0.0227723	-0.0551371	-0.0282118	0.0172475	0
21.6	0.00707106	-0.0442643	-0.00631179	-0.0405742	0.0200365	-0.0537002	-0.0575721	-0.0525081	-0.0569153	0.0011756	0
21.8	0.00414651	-0.0459908	-0.0348428	-0.0232888	0.036171	-0.05781	-0.0304741	-0.0247182	-0.0522881	-0.00510045	0
22	-0.0512194	-0.0517025	-0.0414673	-0.00175004	0.0291941	-0.0569282	0.00953599	0.0150942	-0.0448778	0.0214883	0
22.2	-0.0633977	-0.0440253	-0.0413229	0.017283	-0.00119702	-0.050549	-0.00817343	0.0480425	-0.0227882	0.00719426	0
22.4	-0.00675672	-0.018962	-0.0488827	0.0474297	-0.00140955	-0.00760997	-0.0202609	0.0332704	0.0117424	-0.0562939	0
22.6	-0.0407837	0.0218979	0.0250352	0.000140761	0.0231874	-0.0423825	-0.0393454	0.0136949	-0.0252358	0.00652765	0
22.8	-0.0327307	-0.0511286	0.0235582	-0.0175139	-0.0157706	-0.0120942	-0.0199572	-0.0125023	-0.0105941	-0.00664994	0
23	-0.00983193	-0.0591021	0.0613658	-0.0323129	-0.0131068	-0.0148963	0.0258062	-0.0469261	-0.00566437	-0.000188841	0
23.2	-0.0347279	-0.0146119	0.00369731	0.0108388	0.00795143	-0.0482163	-0.011733	-0.06405	-0.00983568	0.00624464	0
23.4	-0.0677974	-0.0379116	-0.0368674	0.0268064	0.0100523	-0.0457482	-0.037341	-0.0056699	-0.0205079	0.00113777	0
23.6	-0.0468864	-0.0899757	0.0323561	-0.0300596	0.00945429	-0.0143751	-0.00320607	0.0340214	-0.00827548	0.0229038	0
23.8	-0.0195362	-0.0458525	0.0103101	-0.0366273	-0.0101383	-0.00739784	-0.032104	-0.0591501	0.042028	0.016325	0
24	-0.0596731	0.0242725	-0.0315047	-0.0255651	-0.0483699	-0.0243906	-0.0175457	-0.0894809	0.00162468	-0.055371	0
24.2	-0.0404054	-0.0477048	-0.0192218	-0.0214691	0.0104752	-0.00664551	0.0580775	-0.0427846	-0.051396	0.00175986	0
24.4	-0.0416144	-0.0654764	-0.000974703	0.00564203	-0.0201196	-0.0100534	-0.0507834	0.0267066	-0.0432918	0.0420582	0
24.6	-0.0329869	-0.0329704	-0.0339034	-0.00356481	0.0171244	-0.00312159	-0.0570813	0.0315696	0.00302018	0.011247	0
24.8	0.0163833	-0.00417611	-0.0369593	-0.0177246	0.0582129	-0.000949732	0.0298809	-0.0148297	0.0120248	-0.011359	0
25	0.0340783	0.0330673	0.0217766	0.0088724	-0.0377204	-0.0099677	-0.0240208	-0.0073492	0.00228916	-0.00794599	0
25.2	0.0203231	0.0410743	0.00954993	0.00219845	-0.0225188	0.0283153	-0.0091382	0.0457117	0.0377114	-0.0145285	0
25.4	0.0601126	0.0786459	-0.0236057	0.0194164	-0.0128403	-0.00324272	0.00925824	0.0115455	0.0191735	-0.0114083	0
25.6	0.0434942	0.0770053	0.0455306	0.0275442	-0.0211783	0.0828607	0.0138987	0.0468549	0.0741283	-0.0181688	0
25.8	0.0931962	0.0609954	0.08235	0.0199074	0.0471889	0.0696411	0.0146845	0.0407283	0.0649421	-0.0112898	0
26	0.10116	0.0585636	0.0454054	0.0458876	0.0573369	0.0597438	0.0290089	0.0236828	0.0298011	0.0126639	0
26.2	0.0311789	0.0435428	0.0273607	0.0552121	-0.00570358	0.0819503	0.0347559	0.0303076	0.0651747	0.0255512	0
26.4	0.0305855	0.0133067	0.0305259	0.00918627	0.00079612	-0.0272709	0.0232675	-0.00640515	0.0449385	0.0166731	0
26.6	0.00256054	-0.00554122	-0.0142168	0.0160756	-0.0273436	-0.0314904	0.0317916	-0.00450311	-0.0869966	-0.00259641	0
26.8	-0.0211035	-0.0598856	-0.0304677	-0.0409271	-0.0492985	-0.0102057	-0.0235212	-0.0248278	-0.0765146	-0.0331353	0
27	-0.012799	-0.0288518	-0.011563	-0.0255774	0.0133709	-0.0297804	-0.0267108	-0.058471	-0.0285112	-0.0275053	0
27.2	-0.0519356	-0.0139494	0.0194108	-0.0042873	0.0106461	-0.0760585	-0.0228912	-0.0877647	-0.00993641	0.0134842	0
27.4	-0.0810714	-0.0596004	0.0191269	-0.0234677	-0.0344429	-0.076459	-0.0313865	-0.0380581	-0.0347704	0.0289129	0
27.6	-0.0674753	-0.0788605	-0.0365082	-0.0346457	0.0121101	-0.0385372	-0.0339911	0.0124164	-0.0672589	-0.00076667	0
27.8	-0.050389	-0.028866	-0.0929207	-0.046269	0.0406914	-0.0100058	-0.043326	-0.0485921	-0.0502626	-0.0315483	0
28	0.08462	0.053976	-0.0771341	-0.040376	-0.0629938	0.0701642	0.00641893	0.0191865	-0.0471353	-0.0447614	0
28.2	-0.00897071	-0.0521561	-0.0526305	0.00778316	-0.00217209	0.0289091	-0.0344929	0.0396	0.00491849	-0.0107574	0
28.4	-0.00359963	0.0286595	0.0109516	0.00371593	0.0600612	-0.00968245	0.00518949	-0.00437576	0.0120052	-0.0348404	0
28.6	0.0371675	0.108463	0.0181527	0.0138147	0.0105226	0.0154552	0.0538543	-0.0277885	0.0246564	-0.0455243	0
28.8	0.0221917	0.0684602	-0.0285436	0.0339051	-0.0756411	0.0710655	0.0516668	0.0523182	0.0378037	-0.00274685	0
29	0.0450642	0.0634603	-0.0170177	-0.00985246	-0.0883589	0.0637508	0.0534399	0.107195	0.0250847	0.0173015	0
29.2	-0.0182884	-0.0296424	0.00974213	-0.0231487	-0.00056431	-0.0491513	-0.00023817	-0.0312001	0.0698283	0.0277125	0
29.4	-0.0540849	-0.0269943	0.000781271	0.00910328	0.0256233	0.00750189	-0.00704032	0.00812536	0.00749537	0.0501179	0
29.6	-0.00351887	-0.0305727	0.017435	0.00925776	0.0436891	-0.0133819	-0.0347056	0.0235171	0.0295517	0.0679041	0
29.8	0.0467112	0.0152263	0.0179583	0.00161896	0.027629	-0.0159617	0.029594	0.0195157	0.0167381	0.052909	0
30	-0.0119882	0.0542903	-0.0190439	0.0216778	0.0405523	0.0286522	0.0860139	0.0316594	-0.038136	0.0394435	0
30.2	-0.0514026	0.02227	-0.00757385	0.0328382	0.0452473	-0.000118951	-0.00789303	0.0127721	-0.0208123	0.0376317	0
30.4	0.0311142	-0.0281511	0.0624959	-0.00287551	-0.0268982	-0.0519742	-0.0923561	-0.0173464	0.0110489	0.012836	0
30.6	0.000739179	-0.0936365	0.0386099	-0.0282896	0.00974532	-0.00405293	-0.0033288	-0.00439349	-0.0206335	-0.0178763	0
30.8	0.0103031	-0.0310552	-0.0154279	0.0241406	-0.0133896	0.0207544	0.044085	0.00960858	-0.0110144	-0.0546981	0
31	-0.0235416	-0.0173047	-0.0150775	0.0167556	-0.0214387	-0.00534135	0.005538	-0.0419376	-0.0137214	-0.013076	0
31.2	-0.00858411	-0.0336887	0.00759603	-0.0417663	0.0120715	-0.023739	-0.0228137	-0.0963339	-0.0047432	-0.0466828	0
31.4	0.0178478	-0.0378159	0.000952237	-0.0356847	0.0156357	-0.0358609	-0.0325913	-0.0607484	0.00282521	-0.0388112	0
31.6	-0.0195569	-0.0540861	-0.00608699	-0.00355506	0.0132851	-0.0317209	-0.0116944	-0.0196846	0.000215715	0.0487585	0
31.8	-0.00450306	-0.0352902	0.0173894	-0.0364576	0.0453038	0.0178076	0.0625396	-0.0507272	0.0228588	-0.0266284	0
32	0.00506579	0.0134668	0.00428507	0.00422753	-0.0243751	0.00391146	0.00869246	0.0595365	-0.0239819	0.0184481	0
32.2	0.0222328	0.0177627	-0.0085235	0.0067474	-0.0226007	0.00920072	-0.0475059	0.0802178	0.0057068	-0.0233256	0
32.4	-0.0461138	0.00277578	-0.0267883	0.000208283	-0.00145463	0.0159916	-0.00875386	0.00732591	-0.0244739	0.0174422	0
32.6	-0.049896	-0.00882346	-0.0125816	-0.0072729	0.0195416	-0.0156794	0.00737019	-0.00240275	-0.0138111	0.024316	0
32.8	0.0286307	-0.0115947	-0.017029	0.0193477	0.0288491	-0.0226625	-0.0299264	0.0304124	0.050174	-0.0306088	0
33	0.0225091	0.00635192	-0.0415815	0.0593936	-0.00633023	0.0250685	-0.024454	0.011464	0.0186897	-0.00235684	0
33.2	0.00529641	0.0298845	0.0430505	-0.00903079	-0.0268149	0.0223424	-0.0100051	0.0146808	0.00223472	-0.0262004	0
33.4	0.0198077	0.0350385	0.00697702	-0.00576916	-0.0486025	-0.0104092	-0.0139858	0.0301979	0.0101213	0.0051591	0
33.6	-0.0282405	0.0817404	-0.0170269	-0.0409067	-0.0771802	-0.01701	0.0436815	-0.00645466	-0.0198559	-0.0292498	0
33.8	-0.00762062	0.0581414	0.03746	-0.00831398	-0.0356749	-0.0327421	0.0731538	-0.0222434	0.0112533	0.000848481	0
34	0.0425335	0.0342276	0.0331683	0.0158692	-0.00400674	0.0141975	0.0136974	0.0150949	0.03942	0.0450607	0
34.2	0.0397986	0.069748	0.00160052	-0.00308273	-0.00545842	0.0693521	-0.0104714	0.0272014	-0.0012389	0.0135315	0
34.4	0.0556082	0.0556435	0.0477917	0.0603605	0.0249802	0.0264189	0.0645334	0.00695463	-0.00352774	0.00368238	0
34.6	0.0458737	0.0597777	-0.0135878	0.0403388	-0.0301101	0.0917534	0.0683887	0.0618337	0.0228382	-0.0108843	0
34.8	0.0338259	0.0776441	0.0275614	0.0423525	0.0228617	0.0642289	0.0584759	0.0852886	0.0396284	0.0257257	0
35	0.0454073	0.0192965	0.00846801	0.048495	0.0408956	0.0315908	0.00628501	0.058738	0.0335284	0.0266782	0
35.2	0.0292434	0.0138474	-0.0295697	0.0236995	0.0488043	-0.00178873	0.00752029	0.00579831	0.0140406	-0.00932557	0
35.4	-0.0132899	0.0046042	-0.0244221	-0.00923038	0.0699866	-0.0207126	0.0169471	-0.0305793	0.00672004	-0.0130124	0
35.6	-0.038214	-0.0839628	-0.0112751	-0.00928518	0.0424267	0.00405423	-0.0333163	-0.0268722	0.00150331	0.00796656	0
35.8	-0.0351466	-0.052639	0.0272211	0.0151297	-0.00124871	-0.0032523	-0.00639528	-0.00997852	-0.0106413	0.0015106	0
36	0.0189169	0.00919717	0.00590088	-0.00741145	-0.0534336	-0.00679733	0.0308373	0.00120755	0.0305783	0.00792245	0
36.2	-0.0157156	-0.0183619	-0.0283894	-0.0506737	-0.0385793	-0.00985868	-0.0570888	-0.0266417	-0.037058	0.00269936	0
36.4	-0.062724	-0.0770414	0.0146108	-0.0298075	0.0161382	-0.00603397	-0.0836921	-0.0426006	-0.0411201	-0.0383226	0
36.6	-0.0086438	-8.68587e-05	0.0266693	-0.0164232	0.0206024	-0.0229364	-0.0392791	-0.0764257	-0.015502	-0.0412004	0
36.8	0.0457281	0.0424352	-0.00891532	-0.0357943	-0.0280583	-0.0356644	-0.0141903	-0.0580036	-0.0347209	-0.0142176	0
37	-0.00435056	-0.0813463	0.00253735	-0.0281397	-0.0511658	-0.00305532	0.00607647	0.0546907	-0.0231971	-0.020791	0
37.2	-0.0173161	-0.0112976	-0.017406	-0.0245461	-0.0330986	0.00935202	0.0134528	0.0622123	-0.0114414	0.00146191	0
37.4	0.0222622	0.0404819	-0.0184083	0.0470941	-0.0276971	0.000464552	0.0284073	0.0860961	0.0417786	0.00911312	0
37.6	0.0659704	0.0210643	-0.0261527	0.0106288	-0.0308687	0.0438798	0.0159699	0.0718128	0.0848114	-0.0133512	0
37.8	0.0114302	0.0291832	-0.0489127	-0.0440605	0.0123109	0.0127419	0.0465797	0.0608809	0.0640971	-0.0103802	0
38	-0.0233099	0.0155449	-0.0427444	-0.00632335	0.0391656	-0.0162389	0.0818592	0.0341743	0.0744391	-0.00131415	0
38.2	0.0394119	-0.0210218	0.00740495	0.00596362	0.00407538	0.0233638	0.0596327	-0.0196005	0.0759583	0.0168466	0
38.4	0.0254997	0.0160019	0.029519	-0.0472022	-0.00747468	0.00549957	0.0208384	-0.0140015	-0.0197731	0.064645	0
38.6	-0.0823737	-0.0160386	-0.0286545	0.0295044	0.0123748	0.0120855	-0.0509828	-0.0122094	0.0181975	0.0118947	0
38.8	-0.131442	-0.0698567	-0.0346592	-0.0461129	0.00376429	-0.0826324	-0.0955213	-0.110823	-0.117307	-0.0170489	0
39	-0.160376	-0.147889	-0.0360863	-0.0593858	-0.00442059	-0.0969284	-0.167508	-0.192421	-0.179877	-0.00162665	0
39.2	-0.18567	-0.218734	-0.0189838	-0.000937123	0.0400068	-0.111558	-0.203877	-0.194161	-0.203026	0.0387439	0
39.4	-0.174349	-0.231966	0.0106372	-0.0202033	0.0700872	-0.157383	-0.186247	-0.183093	-0.210154	0.051821	0
39.6	-0.166123	-0.198353	0.00302805	-0.0712201	0.0233982	-0.13573	-0.18006	-0.189747	-0.170909	0.0147583	0
39.8	-0.16419	-0.128727	-0.00598894	-0.0353213	0.000181656	-0.113794	-0.133962	-0.106773	-0.193613	-0.00731634	0
40	0.00695527	0.0289793	0.000306503	0.0323291	0.0475516	-0.0449797	0.0185367	0.100901	0.0341017	-0.0104944	0
40.2	0.0967534	0.0718714	-0.00145523	0.0359548	0.0244671	0.0134647	0.104258	0.0880496	0.0727633	-0.0219667	0
40.4	0.100233	0.0480638	-0.00193169	-0.00961831	-0.0748348	-0.00579351	0.0215775	0.0145085	0.0356326	-0.0334702	0
40.6	0.0562133	0.0758169	-0.00314291	-0.0147684	-0.0408683	0.0207331	0.0193291	0.0225395	0.0439059	-0.0242783	0
40.8	0.0819817	0.161682	0.00711769	0.0348194	0.0250749	0.121942	0.128756	0.0720968	0.0764937	-0.0141073	0
41	0.198888	0.211042	0.0503049	0.0649041	-0.0601354	0.167674	0.12618	0.121097	0.135429	-0.0234367	0
41.2	0.120531	0.152746	0.0775312	0.0619805	-0.00524588	0.170469	0.128499	0.114655	0.111026	-0.014858	0
41.4	0.0682858	0.121815	0.0286282	0.075132	-0.010418	0.0926407	0.106011	0.0992859	0.0591049	0.00193446	0
41.6	0.0159431	0.0284114	-0.00765673	0.00398795	-0.0241548	-0.014397	0.0857752	-0.00539724	0.0432188	-0.0204446	0
41.8	0.0115878	-0.00555644	0.0343272	-0.0187806	0.000121794	0.0209144	0.0537343	-0.0384214	0.0757343	0.0127239	0
42	0.0314297	0.0180694	0.0372359	-0.0130012	0.0115172	0.0199577	0.00960927	0.010678	0.0308211	0.0372132	0
42.2	0.0143614	-0.0271082	-0.0279262	-0.0267748	0.0027151	-0.103275	-0.0263009	0.00121594	-0.05361	0.000260011	0
42.4	-0.00864271	-0.0641244	-0.0185364	0.040354	0.00868299	-0.0680195	-0.0560048	-0.0315536	-0.00199569	0.0162619	0
42.6	-0.0610566	-0.00377399	-0.00332981	0.0178767	-0.0134454	-0.00617546	-0.0617717	-0.0115871	-0.00602815	0.00274635	0
42.8	-0.000406689	-0.0156143	0.00800122	-0.029583	-0.0102755	0.0203857	-0.0355504	0.0490782	-0.0038346	0.0338239	0
43	0.0177089	-0.0176847	0.0271149	-0.0235824	0.0276441	0.0267998	-0.0142377	0.0795487	0.0324555	-0.00104582	0
43.2	0.0145765	-0.0105521	0.00544018	0.0268737	0.00111799	-0.000494006	0.00521042	0.0266968	0.0370173	0.00298074	0
43.4	0.015498	-0.00215756	-0.0253351	0.0364273	0.010479	-0.00827426	0.0610933	-0.00689925	0.00577741	0.0247807	0
43.6	-0.00525778	0.0212532	-0.0168148	-0.00365354	0.0825206	0.0199283	0.0912833	0.0348133	-0.00758598	-0.0428867	0
43.8	0.0297603	-0.0028449	-0.0239659	0.00674472	-0.0167261	0.00645298	0.0194932	0.0124329	0.000119802	-0.0340891	0
44	-0.0216358	0.0280032	0.0140392	0.0186022	0.00344368	0.0743236	0.0416799	-0.00123279	0.0269302	-0.0118578	0
44.2	0.0421373	0.0152176	0.038051	0.0242694	0.00753067	0.0129584	0.01683	0.00616203	-0.00933588	0.0291407	0
44.4	0.0174382	0.0306475	0.00765484	-0.0106027	-0.00124047	0.0104899	-0.0112421	0.00043568	-0.00559008	0.0419634	0
44.6	-0.0044716	0.028259	0.0130892	-0.0270161	-0.0105147	0.0292081	0.000115279	-0.0177993	0.0223213	0.0108164	0
44.8	0.0445017	0.00607252	0.0575425	-0.00929678	-0.0444996	-0.0159178	-0.007408	-0.0275431	-0.00597877	-0.0215074	0
45	-0.0252969	0.0457413	0.00986314	-0.0145397	-0.0641207	0.00777078	-0.0294434	-0.0145267	-0.0269775	-0.0242816	0
45.2	-0.0210648	-0.00487375	-0.0786432	0.00972365	-0.0437826	0.00450333	-0.00598826	0.0208346	0.00891937	-0.00798223	0
45.4	-0.0137219	-0.0358686	-0.0188042	0.00133926	0.0195726	-0.00364385	-0.0130232	0.00264654	-0.00361457	-0.00600642	0
45.6	-0.0475329	-0.0205841	-0.00983464	-0.0279934	0.0068602	0.0052928	-0.0741229	-0.055077	-0.0240893	-0.0250249	0
45.8	-0.0447027	-0.0164501	-0.0409346	-0.0193606	-0.0365805	-0.00648043	-0.0551954	-0.0261668	-0.0469664	-0.00563785	0
46	-0.013363	-0.0360527	-0.0286396	0.00215464	-0.0109968	-0.0232256	0.0181914	0.0226408	-0.0456353	0.00292559	0
46.2	-0.00292519	-0.0202221	-0.0164896	0.0155662	0.029085	-0.00226666	0.00384568	0.00310053	-0.0182806	-0.0337084	0
46.4	0.0183996	0.0329659	-0.0156604	0.0341384	-0.00801012	0.021731	-0.0402235	0.00605383	-0.0313933	-0.0244236	0
46.6	0.0186331	0.0086251	0.019895	-0.0307872	-0.0167505	0.0118105	0.0233029	-0.0283632	-0.0268381	-0.0129413	0
46.8	0.00158643	-0.011515	-0.0192412	0.000610736	0.00423347	0.0178422	0.0494369	-0.0317216	0.0103709	0.0167524	0
47	0.02052	0.018121	0.00509512	0.00951022	-0.0127555	-0.00405091	0.0430377	0.0275001	0.0514579	0.0197961	0
47.2	0.0720468	0.0611294	0.0469678	-0.00109618	-0.0218874	-0.00746739	0.0313536	0.00291434	0.0619121	-0.00986641	0
47.4	0.0793315	0.0725496	0.0327921	0.00997723	-0.0179855	0.0213623	0.019284	-0.0157425	0.0584156	-0.0248885	0
47.6	0.0361396	0.0477063	0.0122246	-0.00599122	-0.0115368	0.0329241	0.0236609	0.0729169	0.062042	0.00237997	0
47.8	0.0172677	0.00894173	-0.0156027	-0.00249181	0.0519028	0.0446401	0.0244306	0.00885213	0.0323206	0.0488969	0
48	-0.0523453	-0.0182785	0.0298256	0.0183001	-0.020817	-0.0120432	2.47078e-05	0.000345553	-0.0135432	0.0611835	0
48.2	-0.0214455	0.0130531	-0.0186297	0.00705883	-0.0162635	-0.0400847	0.0397449	-0.00610237	0.0188075	-0.000319926	0
48.4	0.00665996	-0.00385298	-0.0306717	0.00235181	0.020089	-0.0315418	0.00229006	0.0305853	-0.00987495	-0.00884961	0
48.6	-0.0727351	-0.0619032	0.0232469	-0.034487	0.0333338	-0.018757	-0.0761483	0.0238692	-0.0595439	0.00341598	0
48.8	-0.110139	-0.0786059	0.00950549	-0.0815271	0.0568332	-0.0363999	-0.081535	-0.037814	-0.0209487	-0.0241352	0
49	-0.0311907	-0.0719261	-0.0391824	-0.0359879	0.0439097	-0.0780366	-0.0615675	-0.0106138	-0.00590096	-0.00685059	0
49.2	-0.0623513	-0.0665964	-0.0109623	0.00113803	-0.00912031	-0.0526331	-0.0163873	-0.0138436	-0.0626732	0.0113336	0
49.4	-0.0180157	-0.07615	-0.0207423	0.0186759	0.0117341	-0.0520127	-0.0449793	-0.00348651	-0.0438988	-0.0336034	0
49.6	0.0110267	-0.0341458	0.0179075	-0.0097239	0.0221021	-0.0463806	-0.0181086	-0.0106169	-0.0232505	0.0154287	0
49.8	-0.0239474	-0.0311548	0.0560691	-0.000357808	0.0318094	-0.031788	-0.0307577	-0.0440271	-0.0570435	0.0480496	0
50	-0.0429945	-0.0706385	0.0328837	0.0215713	0.0518565	-0.0184916	-0.0586432	-0.0540656	-0.022618	0.0158454	0
50.2	-0.00886809	-0.0437774	-0.00467902	0.00509353	0.0251814	0.0100607	0.00838505	-0.0284761	0.0716814	0.0223013	0
50.4	0.0350918	0.040813	-0.0327854	0.0324844	-0.0341821	0.0558041	0.0557985	0.0117742	0.0382815	0.0203278	0
50.6	0.0630197	0.116202	-0.037402	0.0284919	-0.0560813	0.0874716	0.0940706	0.0726517	0.0219611	-0.0175099	0
50.8	0.0323515	0.034731	0.0264833	0.0278318	-0.0195493	0.00791962	0.00615585	-0.0721511	-0.0191066	-0.0277105	0
51	-0.00441862	-0.0206257	0.0401226	0.0137191	0.0212733	-0.0327851	-0.0457346	-0.0203067	-0.0236454	-0.000144748	0
51.2	-0.0406108	-0.0390895	0.0251341	0.0252128	0.0349568	-0.0429207	-0.0433378	0.0490168	-0.00832063	0.0424485	0
51.4	-0.0669445	-0.0759661	0.0261135	0.0294821	0.0441929	-0.0675221	-0.0879903	-0.0159781	-0.0309006	0.0809285	0
51.6	-0.0456783	-0.0405383	0.0232933	-0.0194045	0.0287965	-0.0383489	-0.0884107	0.0190543	-0.040414	0.0640262	0
51.8	-0.030886	0.0320684	0.0463787	-0.00959203	-0.0445241	0.00545708	0.061773	-0.0370933	0.0118322	-0.0296791	0
52	-0.0582999	0.000900948	-0.0496675	-0.0331689	-0.0104394	0.0341775	0.0867721	-0.00257117	0.0223572	-0.0244944	0
52.2	0.0674806	0.0368122	-0.0862917	-0.0275791	-0.0438904	0.0875176	0.0623731	0.00311803	0.0199106	-0.0209103	0
52.4	0.137774	0.036149	-0.0622832	0.0153693	-0.0839831	0.117323	0.06269	-0.0107799	-0.00357534	-0.0399893	0
52.6	0.0964912	0.0315948	-0.0507196	0.00352188	-0.0549714	0.0985038	0.0659194	0.0428276	-0.0133003	-0.0904231	0
52.8	0.09576	0.0839375	-0.0199947	-0.0256825	-0.035036	0.0483646	0.0735307	0.076776	0.0252781	-0.108955	0
53	0.0992593	0.0796613	0.0416698	0.0211783	-0.0366571	0.022194	0.0740932	0.018901	0.0581979	-0.0179649	0
53.2	0.0565242	0.115639	0.0377338	-0.00358988	0.0106531	0.0952303	0.0033383	0.0564506	0.0524963	-0.0100467	0
53.4	0.0104193	0.00143081	-0.00973131	-0.00598423	-0.028058	0.00579663	0.0319444	0.0254786	0.00153955	-0.0188522	0
53.6	-0.00774059	0.0069953	-0.0511815	0.00750016	-0.004976	-0.00962845	-0.00816451	-0.00206507	-0.00476229	-0.0211174	0
53.8	0.017294	0.0486185	-0.0598239	-0.00417155	-0.00852288	0.00443436	-0.00339486	-0.0293841	0.0131673	-0.0310483	0
54	0.0019577	0.00906959	-0.0442292	-0.0270774	-0.0375297	-0.0266222	0.0158077	-0.0451082	0.00479458	-0.0249049	0
54.2	-0.0663916	-0.00975991	-0.0178112	-0.0285124	0.0197278	-0.0138472	-0.0596732	-0.0137938	-0.0142245	0.0148727	0
54.4	-0.0416186	-0.0422689	0.0176325	-0.0141044	0.0267834	-0.0294284	-0.0207643	-0.0219553	-0.0309775	0.0427479	0
54.6	-0.00985285	-0.0797525	0.0314106	-0.00835563	0.0127079	-0.0727765	-0.0556129	-0.0270455	-0.050489	0.0280379	0
54.8	-0.0286242	-0.0448137	0.0209297	0.00266604	0.0287881	-0.0604338	-0.0663787	-0.0122488	-0.0423286	0.0148595	0
55	-0.0798341	-0.0495577	0.0248399	0.00124624	0.0105837	0.0243154	-0.0501737	-0.0288277	-0.0395128	0.0076213	0
55.2	-0.0331829	-0.0555597	0.0558312	0.0181316	0.0116503	0.028905	-0.0306544	0.00424321	-0.000595322	0.00954254	0
55.4	0.0118616	-0.034849	0.0600501	0.025587	0.0386039	-0.0521626	-0.011888	0.0653317	0.0166365	0.0302814	0
55.6	-0.091959	-0.048965	0.0195196	-0.0220896	0.0104768	-0.0658276	-0.0196315	0.0299118	-0.0415535	0.0340367	0
55.8	-0.0819218	-0.0109833	0.0228297	-0.0224825	0.0177444	-0.0579959	-0.0501693	0.00297362	0.0147677	0.00169443	0
56	-0.0566976	-0.0629879	0.0380143	-0.0170536	0.0452328	-0.0291142	-0.0652808	-0.0369542	0.00131052	0.0612787	0
56.2	-0.0955756	-0.068563	-0.030663	-0.0242234	0.0666006	-0.0829903	-0.0197874	-0.0610544	-0.00710852	0.0376697	0
56.4	-0.0573285	-0.0174865	-0.0969832	-0.0144724	0.0260224	-0.0931945	-0.0514785	-0.0374763	0.0239175	-0.00252302	0
56.6	0.0222844	0.0157051	-0.0998864	-0.00156758	-0.0291155	-0.0304903	-0.0196428	-0.0433567	0.000597964	0.00479889	0
56.8	0.0316164	0.00883377	-0.0511599	-0.0207439	-0.0538608	0.00487148	0.0835588	-0.0558227	-0.0515233	-7.93013e-07	0
57	0.0451664	-0.0180061	0.014995	-0.0408259	-0.0786931	0.0410641	-0.0228964	0.0337147	-0.0162946	-0.0196369	0
57.2	0.0498567	-0.00503128	-0.0363636	-0.0136988	-0.0380852	0.0919175	0.0102858	0.0420962	-0.00467315	-0.0616949	0
57.4	0.0650037	0.0303682	-0.0714769	-0.0117855	-0.0637273	0.0745113	0.0942171	0.017382	-0.0057783	-0.0632543	0
57.6	0.075459	0.0502228	-0.0480056	-0.0273872	-0.0739937	0.0883472	0.149544	-0.0175238	-0.0606221	-0.0472562	0
57.8	0.0447275	0.0530869	-0.0221039	0.00614461	-0.0223094	0.112756	0.159954	-0.0157022	-0.0520488	-0.0612837	0
58	0.0398532	0.0673539	-0.0213922	0.00883396	-0.0266679	0.124745	0.134045	0.00577975	0.0367193	-0.0871138	0
58.2	0.0930725	0.109238	-0.0286615	-0.0515076	-0.0854859	0.146589	0.142428	0.0107226	0.0596688	-0.0750789	0
58.4	0.090224	0.145335	-0.0292269	-0.00725001	-0.029697	0.120227	0.207441	0.0605828	0.0300672	-0.0429927	0
58.6	0.0970516	0.112828	0.000441171	0.00165029	-0.0214683	0.12591	0.130861	0.0912416	0.0410333	-0.04484	0
58.8	0.029688	0.0612621	0.0264592	0.028222	-0.0496318	0.0974242	0.0444814	0.0341722	0.0626566	0.0046044	0
59	0.00874316	0.0675988	0.016979	0.0326997	-0.0131142	0.0593798	0.0561172	0.0230564	0.0636312	-0.00491812	0
59.2	0.0275621	0.0645228	0.0299745	0.028125	0.0334682	0.0379444	0.0440377	0.0741779	0.036147	0.0200247	0
59.4	0.00844429	0.0147638	0.033465	0.032552	0.0300878	0.0287317	0.00355503	0.118433	0.00819384	0.0865751	0
59.6	0.00757052	-0.00409592	-0.0192692	0.0329868	0.0357258	0.033347	0.0377051	0.127177	0.0084267	0.0359349	0
59.8	0.0212997	-0.00899382	0.0291926	0.0891408	0.0486443	0.033971	-0.0198378	0.036033	0.0182944	0.0631926	0
60	0.00890177	0.0211737	0.0171012	0.0245668	0.0628866	0.0635136	-0.0435666	0.0124833	0.0762535	0.053388	1
60.2	0.0612715	0.128583	0.0930949	0.0613911	0.0653947	0.0782771	0.0581526	0.154616	0.0956763	0.0714396	1
60.4	0.126232	0.238494	0.0544789	0.106796	0.0274935	0.178938	0.177123	0.270411	0.137156	0.0551678	1
60.6	0.172714	0.267616	0.00860341	0.0838205	-0.00204994	0.257229	0.238133	0.253672	0.201889	0.00928468	1
60.8	0.20056	0.271551	0.122446	0.0957943	0.0308113	0.208092	0.235801	0.212131	0.210098	0.00843266	1
61	0.163699	0.294259	0.0875185	0.115291	0.0534149	0.200053	0.177332	0.21216	0.189534	0.00705202	1
61.2	0.177879	0.205145	0.0561949	0.115124	-0.00235437	0.132145	0.206851	0.206194	0.147814	0.0217228	1
61.4	0.20689	0.249256	0.012755	0.0865918	-0.0026527	0.0858272	0.263241	0.12783	0.0863113	0.00525148	1
61.6	0.103545	0.139319	0.0569519	0.067651	0.0784462	0.0126244	0.185728	0.0723396	0.103938	-0.00437852	1
61.8	0.0187744	0.0264443	0.0609381	0.0349366	0.108812	-0.0537942	0.0752069	0.117669	0.10025	0.0279557	1
62	0.0550224	0.0820779	0.0142851	0.0127041	0.0668164	-0.0539011	0.0418256	0.133531	0.0723667	0.0664326	1
62.2	0.0710853	0.0832045	0.0403418	0.0237132	0.0280137	-0.0396227	0.00791005	0.0704791	0.100333	0.0313752	1
62.4	0.0564364	0.052903	-0.0150117	-0.010691	-0.039512	-0.0244343	-0.00567286	0.111547	0.044214	-0.0737138	1
62.6	0.0772134	0.0992119	-0.0530546	0.0213638	-0.0601875	0.0810834	0.122054	0.0451863	0.0543842	-0.0605063	1
62.8	0.0509739	0.132739	-0.0582408	-0.00219262	-0.0238199	0.0355711	0.0439405	0.0382481	0.0408481	-0.0170001	1
63	0.0211588	0.0465268	-0.0747828	0.000934887	-0.0240135	-0.00917077	0.0498753	0.0527368	0.00972472	-0.024646	0
63.2	0.0153121	0.0301401	-0.0351588	0.00573746	-0.0497145	0.0133548	0.106389	0.0169199	0.0167845	0.00409592	0
63.4	0.00584939	0.101914	0.0304778	-0.0205095	-0.0214009	0.00503435	0.0498126	0.0142459	0.0596398	0.0378938	0
63.6	-0.0018882	0.0374307	0.015222	0.0216619	0.0408587	-0.00322222	0.0734411	0.0490146	0.10356	-0.0176107	0
63.8	-0.0181968	0.0395798	0.0669576	0.0232891	0.0556689	-0.0196982	-0.00914563	-0.0051136	0.0952061	0.0391973	0
64	-0.0401186	0.0209633	0.0565408	0.0243764	0.013276	-0.0416707	-0.0618367	0.0551691	0.0122546	0.0371116	0
64.2	-0.0237688	0.00500984	0.062277	0.0498604	0.0528683	-0.0678336	-0.068871	0.0496931	0.00257583	0.0364886	0
64.4	-0.0344461	-0.0426205	0.0604539	0.0482768	0.110896	-0.0738962	-0.0783161	-0.00793526	0.0158163	0.0518975	0
64.6	-0.0924492	-0.0829937	0.0474022	0.0251659	0.130671	-0.0808261	-0.100705	-0.0233919	-0.00319358	0.0598456	0
64.8	-0.0997391	-0.039089	0.071755	0.0199971	0.117734	-0.112187	-0.0937844	-0.00539587	-0.0034049	0.0708727	0
65	-0.0494107	-0.0192744	0.0665456	0.00816449	0.0392435	-0.117679	-0.0629296	0.0250785	-0.0174191	0.0725409	0
65.2	-0.103706	-0.10728	0.0291351	0.00372055	0.0574982	-0.096189	-0.133531	-0.0456919	-0.0692209	0.0816002	0
65.4	-0.168786	-0.104412	0.016299	0.00342651	0.104067	-0.117368	-0.112477	-0.0534253	-0.00828077	0.0383049	0
65.6	-0.0325386	0.00268031	0.00912383	-0.0436263	0.0318964	-0.0504551	-0.00811818	-0.00273328	0.0203248	-0.0219065	0
65.8	0.0734532	0.0897733	-0.0269411	-0.0169542	-0.0304805	0.0228329	0.101401	0.0471225	0.0260707	-0.0453539	0
66	0.087379	0.142404	-0.050168	0.0572745	-0.0316705	0.0922629	0.13711	0.0793841	0.0509932	-0.058435	0
66.2	0.195103	0.177034	-0.0233934	0.0217995	-0.0741564	0.203884	0.0966788	0.0659071	0.0222988	-0.0886835	0
66.4	0.144882	0.0951337	-0.00262686	0.0119571	-0.0462215	0.0986936	0.111521	0.00198416	0.0285047	-0.0793992	0
66.6	0.0776457	0.0163862	0.0343572	0.0168876	-0.0380182	0.0317124	0.0543145	-0.0169415	0.0628275	-0.0421428	0
66.8	0.00664234	-0.00943571	0.0369155	0.0146503	-0.0288072	-0.0344045	-0.0437099	-0.0152743	0.0306994	0.0119718	0
67	-0.0652701	-0.0660275	0.0254871	-0.0142392	0.00782993	-0.0996265	-0.0543363	-0.01408	-0.00824909	0.0705978	0
67.2	-0.0885247	-0.0956485	0.0174778	-0.0137485	0.00833747	-0.112778	-0.0663035	-0.0144669	-0.0298677	0.065193	0
67.4	-0.0571252	-0.0594118	0.0254348	0.025568	-0.00464382	-0.0662895	-0.123818	-0.0403052	-0.0529246	0.0223078	0
67.6	-0.0409497	-0.0826468	0.0515733	0.0188153	0.057823	-0.0387905	-0.100689	-0.0638292	-0.0404114	0.0458218	0
67.8	-0.0862371	-0.117593	0.0210432	0.00819514	0.0649717	-0.145542	-0.132882	-0.00642374	-0.0333525	0.043273	0
68	-0.131569	-0.122554	0.0649387	0.0280684	0.0409748	-0.120049	-0.133645	-0.0836322	-0.0470178	0.047579	0
68.2	-0.0784186	-0.0531948	0.0331992	-0.00846088	0.0398068	-0.0377306	-0.0741181	-0.0476518	0.00884546	0.0449529	0
68.4	0.00716234	0.0409335	0.0201363	-0.030276	0.0598841	-0.00172634	0.0423892	0.0317459	0.0272917	0.0031716	0
68.6	0.0637204	0.0775168	0.0413524	-0.00307341	0.0379772	0.0671123	0.130232	0.0425319	-0.00813369	-0.0372411	0
68.8	0.109331	0.110551	-0.0192407	0.00748651	-0.0433996	0.168565	0.120801	0.0673221	0.0152727	-0.0491793	0
69	0.126664	0.204066	-0.0375084	0.024994	-0.078764	0.159215	0.110742	0.0587141	0.0403178	-0.0722889	0
69.2	0.130051	0.128013	-0.0379373	0.0305286	-0.0176366	0.159005	0.140079	0.0646043	0.0512147	-0.0384363	0
69.4	0.0648217	0.0808196	0.0240893	0.0501737	-0.0457925	0.101505	0.120635	0.062338	0.0572105	-0.0136245	0
69.6	0.0614675	0.0888159	0.0115166	0.0139003	-0.0504011	0.0451117	0.0531983	0.0427757	0.0524615	-0.0158288	0
69.8	0.0757389	0.0373805	-0.0359101	0.0127897	0.00638466	0.022806	-0.0128037	0.00900232	0.0115899	0.012165	0
70	0.0183002	-0.0342112	-0.0349726	0.0415632	0.02319	-0.00623636	-0.0103293	-0.0184147	-0.0254964	0.0280059	0
70.2	-0.031642	-0.0156859	-0.0469013	-0.0148994	-0.00133166	-0.038693	0.0411925	-0.0193862	-0.0134987	-0.0166122	0
70.4	-0.0424267	0.00649879	-0.0276948	0.0119348	-0.00825282	-0.0352301	-0.00357084	-0.0189083	-0.0127319	0.0122133	0
70.6	-0.000950014	-0.0301612	0.0361528	0.018001	0.00979722	-0.00637911	-0.0234335	-0.0161398	0.030765	0.0227625	0
70.8	-0.0238718	-0.0468317	0.0222965	-0.0420428	-0.00400902	-0.0365521	-0.0135462	0.0169364	0.0257802	0.0386766	0
71	-0.0767642	-0.025186	0.00311824	-0.0509322	0.0192067	-0.0279487	-0.0601422	0.0277177	0.0299179	0.0259548	0
71.2	-0.0356472	-0.0248091	0.0228636	-0.0225637	0.0327424	0.0109793	-0.0845242	-0.0170896	0.0448922	-0.00670661	0
71.4	0.00108469	-0.0615457	-0.000953564	-0.0433688	-0.0128864	-0.0310084	-0.0277025	-0.0414765	-0.0186188	5.68067e-05	0
71.6	-0.0954137	-0.0721892	-0.0419902	-0.0323652	0.0107716	-0.100649	-0.0207359	-0.00403331	-0.0853296	0.0140453	0
71.8	-0.0459773	-0.0455814	0.02618	0.0468223	0.0563875	-0.104011	-0.046412	-0.0257119	-0.0171988	-0.00633973	0
72	-0.099932	-0.0982108	0.0612312	-0.0169177	0.0216899	-0.0445963	-0.0864379	-0.0158165	-0.00710571	0.0376894	0
72.2	-0.11609	-0.110451	0.00120494	-0.0453614	-0.00109686	-0.0685197	-0.0683989	-0.0024472	-0.0767328	0.0502979	0
72.4	-0.0881357	-0.0901038	-0.0142693	-0.00692912	0.0206268	-0.0913176	-0.0349853	-0.044071	-0.0987689	0.00588991	0
72.6	-0.0974794	-0.0922161	0.0224194	0.0145961	0.0357499	-0.0513366	-0.0547533	-0.0754836	-0.0395101	-0.0198553	0
72.8	-0.0855536	-0.0626543	-0.00740259	0.0155663	0.0257221	-0.0543797	-0.0779339	-0.0507821	-0.0146339	0.000141612	0
73	-0.0242781	-0.0120359	-0.0431981	-0.0308959	-0.000380626	-0.0574798	-0.040079	-0.0314732	-0.0601566	0.0182898	0
73.2	0.108183	0.00258323	-0.0533218	-0.0468099	-0.0368033	0.060236	-0.0027921	0.0694613	0.0103085	-0.0283124	0
73.4	0.135515	0.163625	-0.0485203	-0.0179211	-0.078252	0.145558	0.106959	-0.000212455	0.0224131	-0.0749515	0
73.6	0.136279	0.144323	-0.0421049	-0.00407631	-0.0681204	0.135514	0.193095	0.0165398	0.0683406	-0.0670139	0
73.8	0.109165	0.067	-0.018902	0.00542455	-0.055068	0.0595995	0.117276	0.0663396	0.125668	-0.0399383	0
74	0.0488998	0.10481	0.0136668	0.0138211	-0.0532631	0.00568402	0.00304092	-0.00234541	0.0569202	-0.0214783	0
74.2	0.0396185	0.0267341	0.0101309	-0.00931481	0.00660613	0.0153331	0.0253161	0.00448883	-0.0328164	0.0199358	0
74.4	-0.0339942	0.0269873	-0.0185707	0.00568737	0.0327393	-0.0362782	0.00417972	-0.00368862	-0.00979019	0.0647584	0
74.6	-0.0413956	-0.0477875	0.00249135	0.0105139	0.00890839	-0.0698724	-0.0422107	-0.0241215	-0.0607135	0.0494892	0
74.8	-0.0591076	-0.0670224	0.012547	0.0164646	0.0095549	-0.0453147	-0.00751954	-0.02216	-0.0356905	0.0427551	0
75	-0.0508619	-0.0388537	0.0150118	0.0121358	0.056225	-0.0459041	-0.0257569	-0.0060867	0.0135727	0.0235917	0
75.2	-0.0334186	-0.0450816	0.0353739	-0.00765705	0.0528061	-0.0303796	-0.0899204	-0.00789446	-0.0272513	0.00925948	0
75.4	-0.0712752	-0.0798151	0.0318543	-0.0105388	0.0193467	0.0199903	-0.0841936	-0.00266034	-0.0452105	0.0230709	0
75.6	-0.0696526	-0.100491	0.00830288	0.00263947	0.0798914	-0.0269893	-0.0883123	0.0219166	0.0334763	-0.00933699	0
75.8	-0.0092955	-0.0284959	0.0680512	-0.00787214	0.0354311	-0.0273591	-0.052629	-0.0326649	-0.000347887	-0.0232677	0
76	0.039594	0.0345512	0.0378847	0.0469154	-0.0448053	0.0284963	0.0592414	0.078219	0.0329132	-0.0202742	0
76.2	0.0634206	0.146969	-0.00992752	0.0626778	-0.0522601	0.136686	0.0629126	0.0587841	0.0649697	-0.0412501	0
76.4	0.128153	0.173766	0.0156813	0.0404477	-0.0206592	0.161733	0.0737237	0.00401663	0.0614638	-0.0462156	0
76.6	0.134325	0.105575	0.0490795	0.0444238	-0.0140823	0.109378	0.134763	0.0435243	0.0353835	-0.024349	0
76.8	0.0236302	0.0922967	0.00397636	0.0146408	-0.01627	0.095674	0.0753119	0.0180139	-0.00951936	-0.00874943	0
77	0.0395706	0.0114773	-0.0616681	-0.064359	-0.0088944	0.0225096	0.0127961	0.0425861	0.0111326	0.0271867	0
77.2	0.0281238	-0.0279978	-0.013925	-0.00667557	-0.0318148	-0.0318633	-0.00938254	0.0093879	-0.0123861	0.0152713	0
77.4	0.0175277	-0.0373147	-0.0171138	0.0318881	-0.0208803	-0.0882473	0.0152153	-0.0506076	-0.00127927	-0.00364128	0
77.6	0.00379581	-0.0410447	-0.0358796	-0.00633226	-0.00167802	-0.0513148	0.0578379	-0.0258386	0.0277596	-0.0235058	0
77.8	0.000341956	-0.017739	-0.0448389	-0.00081857	-0.00733512	0.00144254	0.0522903	0.0312091	0.0102863	-0.0392287	0
78	0.00954839	-0.00495085	-0.0559065	0.0260006	-0.01499	-0.0247592	0.00607643	0.022796	-0.0354551	-0.0184098	0
78.2	-0.020985	-0.044556	-0.0201611	-0.0303653	4.37285e-05	-0.0306646	-0.0088431	-0.0105066	-0.0386867	0.0222878	0
78.4	-0.0501354	-0.0308475	-0.00895816	-0.00960612	0.0342483	-0.0385524	-0.0309673	-0.0236662	0.0125704	0.0199162	0
78.6	-0.0645246	-0.0489636	0.0219599	-0.0340486	0.0307266	-0.0157659	-0.0630406	-0.00338045	0.00895493	0.0327619	0
78.8	-0.0746507	-0.106366	-0.0185581	-0.039037	-0.0174345	-0.00246243	-0.0269025	0.00770673	-0.0434634	0.0437044	0
79	-0.0257071	-0.0297374	-0.0100512	-0.00178282	-0.0301382	0.0139532	-0.0251205	-0.0617761	-0.0239096	0.0174692	0
79.2	0.0213596	0.0724585	0.0184472	0.0145461	-0.0152675	0.00749151	-0.0465449	-0.0674921	0.0190794	-0.0226415	0
79.4	-0.0143983	0.00600248	-0.0396673	-0.0125607	-0.0243713	-0.0270001	-0.0155578	0.0148384	-0.0142208	-0.0221934	0
79.6	-0.0358344	-0.0461657	-0.012925	-0.0460259	-0.00632234	-0.00709556	-0.051715	-0.0574305	-0.0299212	0.0179918	0
79.8	-0.036528	-0.0408366	0.0237464	-0.048084	0.0150735	-0.0294879	-0.0663409	0.00315865	-0.0372592	0.0272149	0
80	-0.0126213	-0.0151245	0.0144404	-0.0309822	-0.00927402	-0.0253413	0.0189647	0.0203748	-0.019058	0.0184069	0
80.2	-0.0243131	-0.0374859	0.00224414	-0.0102671	0.0237497	-0.0267326	0.0158059	-0.05552	0.0377938	0.00646171	0
80.4	-0.0345114	-0.0368048	0.0150746	-0.00413384	0.0466654	-0.0124568	-0.0172323	-0.0184914	0.0210183	0.00602858	0
80.6	-0.000872062	0.0129306	0.0280936	0.0157254	-0.0342363	0.00480749	-0.0087146	0.0637094	-0.0224934	0.0187797	0
80.8	0.0103762	0.0348165	0.0127811	0.0572922	-0.0657901	-0.0267956	-0.0310486	-0.014768	0.0335688	0.0109302	0
81	-0.0229136	0.0588896	-0.0192436	0.0251031	0.0576485	-0.0135621	0.0254939	-0.0122947	0.0122042	-0.02651	0
81.2	-0.00743509	0.0298645	-0.0212827	-0.0270528	0.0367871	-0.00799282	-0.00455796	0.0432282	-0.0241106	-0.00643584	0
81.4	0.0150661	0.0134688	-0.0499715	-0.00402684	0.0400674	0.0610436	0.016712	0.0119134	-0.0183422	-0.0125946	0
81.6	0.0206777	-0.00123446	-0.0367982	0.00888224	0.047715	0.0357391	0.00997342	0.00112117	-0.00658659	-0.0206426	0
81.8	0.0170131	-0.028992	0.0186849	-0.00636632	0.0192296	-0.0380429	-0.0126564	0.03399	-0.0135642	-0.0117796	0
82	0.0263323	-0.0189104	0.0330232	0.0142628	0.00558623	0.00325709	0.0187616	0.0247872	-0.027622	0.00692223	0
82.2	0.035478	0.0226575	0.018346	0.0266808	-0.0115442	0.0304134	-0.00182553	0.0188354	-0.0229544	0.038886	0
82.4	-0.0327933	-0.0109614	0.0166207	-0.00825569	-0.000605369	-0.040642	-0.0135182	0.0279548	0.0359107	-0.012219	0
82.6	-0.0108924	-0.0514674	0.0282208	-0.0166544	-0.0209985	-0.0376632	-0.0371373	-0.0217416	0.0271596	-0.0116674	0
82.8	-0.0278753	-0.0106082	0.00435136	-0.0478782	-0.0378984	0.0161074	-0.0117793	-0.0191338	-0.0151043	-0.0233087	0
83	0.0262795	0.0249534	0.0157425	-0.0274369	-0.031818	0.0395164	0.0556686	-0.00664878	0.0126519	-0.0266089	0
83.2	0.08839	0.0190469	0.00628813	0.0459818	-0.0111135	0.0415096	0.0888013	-0.0308122	0.033276	-0.00865489	0
83.4	-0.0116177	0.0241486	-0.0456323	0.0456245	-0.00415705	0.0411716	0.0544658	-0.017067	-0.00151362	-0.0208346	0
83.6	0.00690134	0.0166598	0.0396013	0.0137393	-0.0365947	0.0158294	0.0109914	0.0296762	0.0528903	-0.0152309	0
83.8	0.0972462	0.0538432	-0.0153782	0.0446444	-0.010079	0.0224346	0.0333523	0.0570075	0.0228943	-0.00775924	0
84	0.0187213	0.00380271	0.0170638	-0.0180499	0.0177686	0.0120135	-0.0467602	0.00178224	0.0117564	-0.00847096	0
84.2	-0.0745524	-0.0605828	0.0096339	-0.0436037	0.0096699	-0.0286541	-0.113347	-0.0589446	-0.026789	0.0114444	0
84.4	-0.0592157	-0.0349466	-0.0399045	-0.00358407	0.0087192	-0.0459729	-0.0436459	-0.0401846	-0.062747	0.0360594	0
84.6	-0.0239214	0.0261088	-0.0356975	-0.0180673	0.0152555	-0.0332329	0.024306	-0.0128421	-0.0388594	0.0304088	0
84.8	-0.0392493	0.00332023	-0.0315742	-0.0542312	-0.0247582	-0.046432	-0.0328948	-0.0438419	-0.0361464	0.0120248	0
85	-0.0705807	-0.0825256	0.0348731	-0.0169518	-0.0495717	-0.0641314	-0.0532197	-0.00852981	-0.0569331	0.0131181	0
85.2	-0.0366989	-0.0408006	0.0086884	0.00715484	0.0608995	-0.0101463	-0.0274052	0.00716592	-0.0166247	0.0140871	0
85.4	-0.0242448	-0.0440044	-0.0085344	-0.0216702	0.0976512	-0.00809396	-0.0288751	-0.0242337	-0.00763225	0.0218757	0
85.6	0.0461181	-0.0208	-0.0458371	0.00503802	0.0300106	0.0188607	0.00961587	-0.0413258	0.0145451	-0.000962893	0
85.8	0.112597	0.0786364	-0.0593619	0.0375596	-0.057468	0.0782849	0.0729522	-0.0240633	0.0841193	-0.0321218	0
86	0.0329796	0.0795718	0.00145104	-0.00925378	-0.0826142	0.0350945	0.0298687	0.0166928	0.0665681	-0.0442328	0
86.2	-0.0639069	-0.0403626	0.0161715	-0.0216026	0.00346024	-0.0463869	-0.073102	0.058998	-0.0644167	-0.0546452	0
86.4	-0.0731378	-0.063618	0.0530567	-0.0141423	0.0289017	0.000272313	-0.0334812	0.00584846	-0.0604631	0.0219616	0
86.6	-0.103034	-0.0864912	-0.00527418	-0.0124547	-0.00141459	-0.0493708	-0.0220135	-0.0134573	-0.113925	0.0332614	0
86.8	-0.0345962	-0.0283817	-0.00379452	0.0288678	0.0233776	-0.0298708	-0.0284548	-0.0354014	-0.0557038	-0.0141438	0
87	-0.00512761	0.00299397	0.0163617	0.0124641	0.0255032	-0.0260796	-0.0622893	-0.0702513	0.0093341	-0.0193831	0
87.2	-0.0522369	-0.0591117	-0.00137268	-0.0463651	-0.00307975	-0.0901536	-0.0725588	-0.015346	-0.0238682	0.0403229	0
87.4	-0.0257034	-0.0595645	0.0362548	-0.0232198	0.0340549	-0.0448233	-0.0169306	0.057489	-0.0186344	0.076923	0
87.6	-0.0392552	-2.5866e-05	0.0617309	-0.00925466	0.0421259	2.70149e-06	-0.0404846	-0.0548347	-0.0134829	0.032912	0
87.8	0.00590187	-0.00559677	0.029635	-0.00157222	0.0330827	-0.0475993	0.00930486	-0.0429232	0.0457494	0.0325841	0
88	0.00556686	0.0233555	0.0299581	0.0216251	0.0520736	-0.0544566	0.0386405	0.0175231	0.0786054	0.0216896	0
88.2	0.038467	0.0701492	0.027196	0.0498913	0.00528805	0.0251125	0.0600989	0.0334963	0.0837664	0.0343652	0
88.4	0.0928285	0.0797545	-0.00988034	0.0632546	-0.0547835	0.0632116	0.0989356	0.0741279	0.094616	0.0133122	0
88.6	0.122208	0.0923831	-0.0165856	0.0450668	-0.080845	0.0858647	0.12239	0.103849	0.084746	-0.047936	0
88.8	0.170106	0.145253	0.0149862	0.0227627	-0.124748	0.191145	0.126751	0.0501907	0.0454974	-0.039206	0
89	0.120007	0.163306	-0.0278113	0.0482456	-0.0571725	0.147883	0.107358	0.0921759	0.0463172	-0.0719197	0
89.2	0.0396723	0.104506	-0.0915106	-0.0128222	-0.0532432	0.101019	0.0432087	-0.00108484	0.0220422	-0.100941	0
89.4	-0.0112914	-0.0101218	-0.124646	-0.00841549	-0.0193496	-0.0193892	0.0115479	-0.0601802	-0.00934532	-0.0665351	0
89.6	0.00430685	-0.0549974	-0.076534	-0.0141357	-0.00100214	-0.0220709	-0.0119391	-0.0278839	-0.0533548	0.00157492	0
89.8	0.0171175	-0.070994	-0.00522134	-0.0535974	-0.0100118	0.0528125	-0.0593514	-0.016646	-0.0870778	0.0151481	0
90	-0.0445189	-0.0897853	0.00937957	-0.0249246	0.0227026	-0.0142328	-0.0626476	-0.00489257	-0.0481302	-0.017989	0
90.2	-0.0849899	-0.00472134	0.0143992	-0.00552637	0.036125	-0.0605586	-0.00468687	0.0541684	0.0175352	0.000568204	0
90.4	-0.0284497	-0.0621859	0.018699	-0.00273668	0.0574701	-0.0468833	-0.0262684	-0.0372401	-0.0199073	0.0202197	0
90.6	-0.0134132	-0.0312951	0.0170518	-0.0221432	0.0432828	-0.0785412	-0.0609085	-0.0315427	-0.0210344	0.0546441	0
90.8	-0.0379562	-0.0148093	0.0136087	0.0138641	0.00530815	-0.0755695	-0.0564971	-0.0166548	-0.0434556	0.0168723	0
91	-0.0169492	0.00443773	0.024022	-0.00906229	-0.0132124	-0.0403292	0.0143928	-0.0303415	-0.0360551	-0.0129719	0
91.2	-0.00234535	0.0371952	0.0419624	-0.0492416	0.00213715	-0.00407197	0.0189657	-0.00140075	0.0269099	0.0109712	0
91.4	-0.0362931	-0.0234205	0.0463571	0.0413583	0.0238187	0.031309	-0.0723203	0.0103763	0.0382673	0.00980553	0
91.6	0.0120708	-0.0426901	0.0294348	0.0247194	0.0168229	-0.0232793	0.0100915	-0.0287212	0.0310716	0.0367044	0
91.8	-0.0168833	-0.070387	-0.0328265	-0.0403607	0.00184202	-0.0497889	-0.0331825	0.0258156	-0.0180442	0.0130661	0
92	-0.0591487	-0.00388814	-0.0365793	-0.00105885	0.0229571	-0.0215716	0.0247182	0.00262683	-0.0238207	-0.0209417	0
92.2	-0.0320516	0.0142868	0.0207771	0.0129468	-0.0145115	0.00983754	0.0029957	-0.0455538	-0.00789544	-0.00523578	0
92.4	0.0221643	-0.0265488	0.0626601	-0.0211295	-0.0439205	0.00921495	-0.0445735	-0.0369596	0.0165001	0.00563099	0
92.6	0.0133206	-0.00970653	0.0308389	-0.0203526	0.00697013	-0.00443769	0.0412198	-0.0108571	-0.000957987	-0.0191339	0
92.8	-0.036809	-0.00781089	-0.0501716	-0.0239639	0.0186517	0.000286963	0.0175332	0.00349602	-0.0831221	-0.0112639	0
93	-0.00705405	-0.0466011	-0.0701467	-0.00453792	0.0194785	0.0127069	-0.0391463	-0.0258098	-0.0043195	0.0087134	0
93.2	-0.0142603	0.0228737	-0.0592921	-0.0301918	-0.0221994	0.0205856	0.0346047	-0.0495733	0.00417287	0.0471298	0
93.4	-0.0433446	0.00991756	-0.0282274	-0.0395143	-0.00466687	-0.0220374	0.00819956	-0.0241863	0.000451956	0.00868528	0
93.6	-0.0174271	-0.0249404	0.00977082	-0.0180068	-0.00247695	-0.0160995	-0.0218972	0.00523709	0.0153959	-0.0310228	0
93.8	0.0236174	0.00826248	0.0180195	0.0196944	-0.00577478	0.038255	-0.00528898	0.00392014	0.0169984	-0.0163401	0
94	0.00728128	0.00899653	0.00662127	0.0601508	0.0441964	0.0014784	-0.0456928	0.0118856	0.0139366	-0.000385242	0
94.2	-0.0104056	-0.0186579	0.0226841	0.043203	0.00816321	-0.0713779	-0.00328024	0.0474668	-0.017911	0.0300054	0
94.4	0.0138922	-0.030521	0.00945509	-0.0129402	-0.00109364	0.000800472	0.0122695	0.0432601	-0.0604629	0.0421828	0
94.6	-0.0074272	-0.0924444	-1.04774e-05	-0.00126933	-0.0210098	0.00201069	-0.0237546	0.0201846	0.00536889	0.0369834	0
94.8	-0.0432236	-0.0832844	0.00697037	-0.0148932	0.00694042	-0.0283639	-0.0643757	0.00742441	-0.000822451	0.00248142	0
95	-0.0558302	-0.0250319	0.0155027	-0.0239394	0.0288202	-0.0598902	-0.0314389	-0.0295996	-0.0308225	-0.0271181	0
95.2	-0.037197	-0.00779773	-0.00836972	-0.0029604	-0.0102656	-0.0346989	-0.00408021	-0.0467292	0.00388987	-0.0131688	0
95.4	0.00179108	0.00957627	-0.0455934	-0.0243746	-0.0217072	0.0534031	-0.0754325	-0.00318079	-0.00873919	0.0154617	0
95.6	-0.00353775	0.0191553	-0.00250823	0.0105112	0.0118061	-0.0564006	-0.0561451	-0.0311944	-0.00714923	0.0165018	0
95.8	-0.00172186	0.0029219	0.0208374	0.0368322	0.0344503	-0.00191273	0.0086008	0.0186709	-0.0137157	0.00366973	0
96	0.0719	0.103623	-0.02305	0.0505557	-0.062469	0.115104	0.0584851	0.0647055	0.0151091	-0.0669763	0
96.2	0.112708	0.154925	-0.0617699	0.0292065	-0.115904	0.0750656	0.124083	0.0282565	0.0492958	-0.0944803	0
96.4	0.0789886	0.131065	-0.0168578	0.0131258	-0.0693299	0.0153026	0.13476	0.00864511	0.0447587	-0.056526	0
96.6	0.0736786	0.11259	0.0406165	0.022792	-0.0307808	0.0614486	0.0745782	0.0324055	0.026855	-0.0343081	0
96.8	0.102084	0.0331922	0.0184118	-0.0018439	0.00794719	0.0547912	0.0821145	0.00400556	0.0328927	-0.0169012	0
97	0.0336086	0.0706021	0.053709	0.00873097	0.0422654	0.0678488	0.067789	0.0470229	0.0459126	0.012383	0
97.2	0.034255	0.0416265	0.0311343	0.02921	0.0270162	0.0460676	0.0241438	0.0355283	0.059765	0.00531884	0
97.4	0.0314432	0.00164554	0.00262519	0.0118073	-0.00462255	0.0361643	0.011333	0.0188155	0.0109682	0.00664318	0
97.6	-0.0331161	-0.0117261	0.0519637	-0.0184071	-0.00423381	-0.0175892	-0.0201657	0.0344316	-0.00897924	0.0147055	0
97.8	-0.0902064	-0.0637922	0.0611063	-0.0396097	0.0669878	-0.112051	-0.0681224	-0.0154328	-0.0261308	0.0197161	0
98	-0.0606769	-0.0986347	-0.0330022	-0.0282703	0.110101	-0.0778004	-0.0362523	-0.0976594	-0.0920309	0.028684	0
98.2	0.0218156	-0.00780753	-0.0296384	0.0378097	-0.00485981	0.0655377	0.0133913	-0.026787	-0.0137082	0.0110477	0
98.4	-0.029698	-0.00498593	0.00173507	-0.00841352	0.0399154	-0.0141595	-0.074836	-0.0117658	0.0328117	0.0150707	0
98.6	-0.0545363	-0.0771647	0.0258963	-0.025261	0.0307549	-0.0808762	-0.0589089	-0.0135374	-0.000321996	0.029128	0
98.8	-0.0430627	-0.023329	0.00853271	0.00732555	-0.0233499	-0.0440072	-0.00812648	0.0139996	-0.0439505	0.0332427	0
99	0.0173159	0.0210419	-0.0282743	0.0158164	-0.0295713	0.0329573	0.0135684	0.0248228	-0.0208962	0.0226865	0
99.2	0.0461363	-0.0124634	-0.00407343	-0.0073383	-0.00894695	0.0297316	0.0211245	-0.00381906	0.0342416	0.0158421	0
99.4	-0.0439813	0.0344271	0.0668588	-0.0270645	0.00818825	-0.0738353	-0.0277972	-0.0150751	0.0558374	0.0298878	0
99.6	0.0068142	-0.0461978	0.0401359	-0.0281808	-0.00210918	-0.0381777	-0.0469166	0.0198815	0.0807855	0.0337319	0
99.8	-0.000720821	-0.055974	-0.0200273	0.0242857	-0.0464289	0.00221427	-0.0248876	0.020008	-0.0257623	0.00658421	0
100	-0.00747561	0.00143536	-0.0481361	0.0279608	-0.00355469	0.0231416	0.0609904	-0.00868022	-0.0149502	0.0332104	0
100.2	0.011778	0.00816334	-0.0100857	0.00626052	-0.0184161	0.0398635	0.0541209	-0.00925136	0.0183304	0.0308017	0
100.4	0.0340586	-0.00455949	-0.0116881	0.0260274	-0.0582214	0.0437536	0.00424493	0.0183671	-0.00584412	-0.0421879	0
100.6	0.0334603	0.00596074	-0.0735968	0.0279702	0.0269223	0.0229637	0.0372518	0.0236943	-0.00486737	-0.0691088	0
100.8	-0.0090405	-0.0251943	-0.0366172	-0.029686	0.0584325	0.00220031	0.0115772	-0.00451751	-0.0265656	-0.0243734	0
101	0.0390472	0.0122388	-0.0234635	0.000868734	-0.0224442	0.0457431	-0.0130031	-0.0242026	0.0147731	-0.0394528	0
101.2	0.0527685	0.0803413	-0.016478	-0.0115157	-0.00569302	0.0342835	0.0601949	-0.0261659	-0.00963538	-0.0242961	0
101.4	-0.0352963	0.00248411	0.00561213	0.0205292	0.000973568	0.00175304	-0.00775075	-0.00597418	-0.0553538	-0.0063383	0
101.6	-0.091067	-0.0425185	0.0049251	0.0297222	-0.0165842	-0.0162532	-0.0719787	-0.0138101	-0.0376205	0.0277656	0
101.8	-0.0549094	0.011513	0.0174983	-0.0211952	0.011866	-0.0216792	-0.0120185	-0.0197767	-0.0304966	0.0465181	0
102	-0.0276391	-0.0283729	0.0414808	-0.023084	0.0404432	-0.0242866	-0.00333042	0.0134341	-0.0620143	0.00343162	0
102.2	-0.0279522	-0.0482423	-0.0384272	-0.0370747	0.0401575	-0.0579704	0.0143363	-0.0276984	0.0134457	0.0137958	0
102.4	-0.0295334	-0.0200031	0.0114544	-0.0162026	0.01628	-0.0458517	-0.00399244	-0.0457745	0.0233658	-0.00370892	0
102.6	-0.0273627	-0.0248848	0.0106428	0.00737776	-0.000440608	0.00337901	0.0501676	0.015464	0.00594455	-0.0321679	0
102.8	0.00899026	0.0126505	-0.0232327	-0.0225428	-0.0178213	-0.0251451	0.0258309	0.0756842	-0.0158922	-0.0222574	0
103	0.0382913	0.0253599	-0.0215546	-0.0367118	-0.0209513	-0.0527775	-0.0391338	0.0104413	-0.0020226	0.0170902	0
103.2	0.0317304	-0.0115023	0.0162027	0.007536	0.00704316	0.00913545	-0.026076	-0.0234329	0.0504784	0.021395	0
103.4	0.0390636	0.0563549	0.0657262	0.00906352	0.0134053	0.0420828	-0.0160087	0.0982709	0.0586409	-0.0193762	0
103.6	0.0352525	0.0841599	0.0084648	-0.024736	-0.0452698	0.0354894	0.0284779	-0.0405039	0.0454782	-0.0149936	0
103.8	0.0215286	0.00972188	0.0277798	0.0465263	-0.0558558	0.049569	-0.0706089	-0.00706559	0.0478751	-0.023076	0
104	0.0190617	0.00700241	0.0386664	0.0415661	-0.0285873	0.0280908	-0.0581796	0.0351459	0.00394015	-0.000524942	0
104.2	0.062709	0.071736	0.0197326	-0.00137081	-0.00642533	0.0295713	0.0477968	-0.00126665	0.0114899	-0.0047783	0
104.4	0.0564914	0.0397104	0.00990437	0.00413221	-0.00991606	0.0362537	0.0363346	-0.0119888	0.0614431	-0.0359866	0
104.6	-0.0166437	-0.0586205	-0.00464273	0.00965825	-0.00938363	-0.00182489	-0.0306704	0.00584348	0.0269833	-0.0173173	0
104.8	0.00947149	-0.0218281	-0.0240594	0.0193682	0.0217569	0.0294467	0.0285427	0.0193343	-0.0236188	-0.00354397	0
105	-0.019859	0.0384081	-0.0426549	0.00163232	-0.0146869	0.0576819	0.0644043	0.0363435	-0.021551	-0.0258144	0
105.2	-0.0152524	0.0140675	0.0209946	-0.029043	0.0404324	-0.0146434	0.0451961	-0.0138571	-0.0416573	0.0310888	0
105.4	-0.0514876	-0.0587717	0.00498395	-0.00131857	0.101691	-0.0880421	-0.0484315	-0.0509998	-0.0695006	0.00842735	0
105.6	-0.0698614	-0.082914	-0.0462788	0.0212897	0.0366373	-0.0652394	-0.0779884	-0.0271165	-0.0630312	5.66864e-05	0
105.8	-0.0225297	-0.0421894	0.00564505	0.00645849	-0.0336428	-0.0257513	-0.0238083	-0.00469238	-0.0207652	0.0606196	0
106	-0.0489055	-0.0404456	0.0460865	-0.00162499	0.0242126	-0.0657404	-0.0435593	-0.0216071	0.0153653	0.0378247	0
106.2	-0.110133	-0.10825	-0.0396962	-0.0629628	0.0376734	-0.0812511	-0.066	-0.0336604	0.00990617	0.06156	0
106.4	0.00431268	-0.00814001	-0.0371682	-0.0482257	-0.00489198	-0.00819016	-0.0154693	-0.0373093	0.0455766	0.0419544	0
106.6	0.0515548	0.0458243	-0.0278202	-0.0293695	-0.0333702	0.00674837	0.0428942	-0.02142	-0.00708641	0.000583624	0
106.8	0.0572991	0.00795773	0.000318768	0.00779708	-0.0274688	0.0112803	0.0418744	0.0169367	-0.0292299	-0.0274826	0
107	0.0342372	-0.00597814	0.00710294	0.0359118	-0.066431	0.0291598	0.0637289	0.0117674	-0.0240331	-0.0320421	0
107.2	-0.00354929	0.0514909	-0.0456811	0.0112972	-0.0826823	0.0274557	0.10245	-0.0240198	-0.0422394	-0.0301512	0
107.4	0.0540573	0.0924293	-0.0432415	0.00613024	0.0282657	0.0568564	0.016737	0.00557039	0.0271357	-0.0514445	0
107.6	-0.0358966	-0.0205186	-0.0164588	0.0110643	-0.0130305	0.0542542	-0.0419495	0.010625	0.00877472	-0.0660729	0
107.8	-0.0301381	-0.0104335	0.0123089	-0.008169	0.027815	-0.0218967	-0.0188861	0.0285089	-0.0583138	-0.0346516	0
108	-0.0257268	-0.00328869	0.0315428	0.0222576	0.0169112	-0.0491708	-0.0750555	0.0294013	-0.00682561	0.0223115	0
108.2	-0.0351287	-0.0151998	0.0607277	0.00575448	0.0305104	-0.0350049	-0.0862279	0.0304637	0.04798	0.065608	0
108.4	-0.00822042	-0.0210852	0.10366	-0.0192778	0.0898935	-0.0553625	-0.000413232	0.0376747	0.0164977	0.0545838	0
108.6	0.00739112	-0.0526237	0.0912691	0.036271	0.0439504	-0.0407432	0.0248668	0.0138223	-0.0032035	0.0252577	0
108.8	0.0332075	0.00121652	-0.00998548	0.00364926	-0.005832	0.0815859	0.0390608	-0.0107334	0.0115384	0.0387266	0
109	0.102434	0.0819951	-0.0319289	0.0369374	-0.0594466	0.112239	0.0988674	0.0128163	0.078594	-0.0563534	0
109.2	0.154847	0.132865	-0.0175995	0.0689051	-0.0396951	0.144505	0.146693	0.044925	0.0318171	-0.0752781	0
109.4	0.0563164	0.0982083	0.00381858	0.0389092	-0.0131832	0.0876217	0.0432828	0.0394554	0.0150487	-0.0443448	0
109.6	-0.0458438	0.0121758	0.019804	-0.000545065	-0.000485892	-0.0273869	-0.0674482	0.000663801	0.0110679	-0.00951112	0
109.8	-0.0293727	-0.0114075	-0.0206001	-0.018248	0.0164382	-0.0617871	-0.0364359	-0.0244851	-0.035135	0.0234931	0
110	-0.0528489	0.0110982	-0.0764175	-0.033956	-0.00221014	-0.0525768	-0.0271018	-0.0335606	-0.011267	0.0249769	0
110.2	-0.102198	-0.0685248	-0.013255	-0.0148539	-0.0296537	-0.0531405	-0.0969465	-0.0621268	-0.011079	0.0454115	0
110.4	0.0148033	-0.0268674	-0.0404659	-0.0113597	-0.0143531	0.0665601	0.0427593	0.0227973	-0.0162938	0.00696856	0
110.6	0.059709	0.0401726	-0.0488634	-0.0484977	-0.0734343	0.0665418	0.0886982	-0.00959086	0.0303701	-0.0330637	0
110.8	0.0159538	0.0246427	-0.00908158	-0.0425624	-0.0448944	0.00236726	0.0214389	-0.0232761	0.0171526	-0.0188375	0
111	0.00244953	-0.0381866	0.0354652	-0.00785238	0.0363493	-0.0155213	0.00971032	0.024928	-0.0238367	0.01521	0
111.2	0.0172404	-0.050908	0.0365785	-0.00175806	0.0220032	-0.0425025	0.0172383	-0.0121098	-0.00176973	0.0155116	0
111.4	0.0193939	-0.00564368	-0.0271912	0.0217859	0.0313329	-0.0480282	-0.0120552	-0.0263019	-0.00367118	-0.00215057	0
111.6	-0.0119195	-0.0452068	0.00756746	0.0245538	-0.0118741	0.0133066	0.0307896	0.0138703	0.0134875	0.00528669	0
111.8	-0.055703	-0.057858	-0.00461357	0.0147326	0.0271333	-0.06977	-0.0353423	-0.03012	-0.0214005	-0.0168146	0
112	-0.0827876	-0.0760884	-0.0235024	-0.00362541	0.045571	-0.0902166	-0.069865	0.0113417	-0.0193106	0.00297884	0
112.2	-0.0857661	-0.0566251	-0.0439153	-0.0234822	0.0221201	-0.0697518	-0.0740586	0.0455403	0.000707678	0.00760029	0
112.4	-0.028622	0.0102254	-0.0442526	-0.0161378	-0.000118528	-0.0317102	-0.0659004	-0.00492508	-0.010002	-0.0324589	0
112.6	0.0273562	0.0211916	0.0118883	-0.00335702	-0.0358028	0.0683776	0.00537387	-0.00317589	-0.0115549	-0.0296071	0
112.8	-0.0566828	0.005896	0.00950286	-0.0359817	-0.0282316	-0.00764511	-0.00867099	-0.0112358	-0.0106365	-0.00427545	0
113	-0.0243531	0.0436219	0.00601091	0.00465398	0.0558283	-0.0290441	-0.0392267	-0.0260957	-0.00984309	0.0336629	0
113.2	-0.0146229	0.00455285	0.0353433	-0.0356603	0.0662545	-0.0305473	-0.0265323	0.0295617	-0.0350522	0.0732598	0
113.4	0.00493925	-0.00776149	0.01108	-0.0665533	0.0200051	0.0427752	0.0290819	0.00410115	-0.025055	0.0456156	0
113.6	0.0474928	0.0324321	-0.0397433	0.000895875	-0.0397316	0.0850792	0.0627376	-0.0134983	-0.00606014	-0.0306312	0
113.8	0.0406783	0.028565	-0.0564496	0.0266344	-0.0975766	0.0459226	0.055328	0.0280144	-0.0187909	-0.0522781	0
114	0.00744269	-0.00510137	-0.0429883	-0.0432794	-0.085429	0.0502177	0.0328697	-0.0344777	-0.018758	-0.00741837	0
114.2	-0.0147088	-0.0244443	0.0577307	0.00920205	0.00176341	-0.0486135	-0.0466936	-0.000518111	-0.0184599	0.0100152	0
114.4	0.013563	-0.00353912	0.0586976	0.0377567	0.0386736	-0.0683018	-0.0718623	-0.0214004	0.043232	0.0467127	0
114.6	-0.0152413	-0.0231896	0.0346013	0.00187239	0.00446613	-0.0527075	-0.086147	-0.0242931	0.0231527	0.0384586	0
114.8	-0.0292037	-0.0426197	0.0422224	0.0428682	0.044859	-0.0591731	-0.0487586	0.0566743	-0.0286941	0.0384968	0
115	-0.0123254	-0.0112577	0.0826196	0.0800877	0.0990189	-0.0473351	0.00638776	0.0730088	0.00618778	0.0544362	0
115.2	-0.00968524	0.0416875	0.0828268	0.0245681	0.0253271	0.0064366	0.0407492	-0.0339409	0.0558081	0.0206811	0
115.4	0.0531259	0.0720678	-0.0235782	0.0507984	-0.0309196	0.0504186	0.128141	-0.0729968	0.0167786	-0.0264191	0
115.6	0.0609605	0.0186121	0.00337031	0.0117266	0.00559361	0.0380202	0.0785535	-0.0716096	0.012516	-0.0775398	0
115.8	0.0484677	0.0241695	-0.0129674	-0.0143231	-0.00199817	0.00326892	0.0314124	-0.062196	0.0596791	-0.0771035	0
116	0.0558281	0.0872797	-0.0226779	-0.0403566	-0.0792313	0.13271	0.0471981	0.016416	0.0372061	-0.0822034	0
116.2	0.0938203	0.12173	-0.0472453	-0.0315083	-0.0811319	0.219176	0.0802563	0.0502967	-0.0138675	-0.0876728	0
116.4	0.0924949	0.064537	-0.0716756	0.00954371	-0.0304652	0.121273	0.0686457	-0.00740498	-0.00841239	-0.0544927	0
116.6	0.0268081	-0.00841161	-0.022338	0.00310782	-0.0542032	0.0185439	-0.000686596	-0.0123707	0.0167884	-0.0127418	0
116.8	0.0208467	0.0474533	-0.0544744	-0.00865867	-0.041016	-0.0792756	-0.0520878	0.0374543	0.0246132	-0.000279429	0
117	-0.0253241	0.00142464	-0.0377109	-0.0168853	-0.0495209	-0.00241098	-0.0363763	0.08483	-0.0150554	-0.0302033	0
117.2	-0.0366724	-0.0501794	-0.00559637	0.00236801	-0.00749417	-0.0324551	-0.00995685	0.0596656	-0.00339805	-0.0140876	0
117.4	-0.031501	-0.0387465	-0.0138229	0.00948183	0.0357568	-0.0509169	0.00862663	0.0266904	-0.00281125	0.0263834	0
117.6	-0.0173472	-0.0300885	-0.0164278	-0.00916909	0.0351632	-0.0232418	0.0301744	0.00333044	-0.014675	0.0346635	0
117.8	-0.0106503	-0.0513106	0.0237899	-0.0215109	0.0234065	-0.0563624	-0.00197117	-0.0180375	0.0153289	0.0126031	0
118	-0.0576406	-0.0524412	0.0314058	-0.00143358	0.0179837	-0.0498058	-0.0869636	0.00538459	0.0171827	0.00625346	0
118.2	-0.0319876	-0.0435671	-0.0266145	0.0505444	0.0272714	-0.0344518	-0.0359859	0.0104554	-0.0251482	0.0508299	0
118.4	-0.00553207	-0.0409541	0.0384074	0.00532933	0.0262308	0.0117509	-0.0241854	0.0167458	-0.00721641	0.036906	0
118.6	-0.0202758	-0.0485093	0.0759517	-0.0068009	0.0622112	-0.015391	-0.0562657	-0.0120145	0.0223526	0.0306359	0
118.8	-0.0357113	-0.0249946	0.0368506	-0.00748879	0.081903	-0.0353861	-0.0502696	-0.0298329	-0.0100215	0.0582033	0
119	-0.0281332	-0.0100697	0.0231438	-0.0204469	0.0416988	-0.0112276	-0.0139842	-0.00222564	-0.0280428	0.0303332	0
119.2	-0.0270599	-0.0312691	0.0279074	0.00096082	-0.00304986	-0.0266732	-0.0192208	0.0097932	-0.00159636	-0.0243636	0
119.4	-0.0499707	-0.00753268	-0.0223054	-0.0186926	-0.0240477	-0.0292043	-0.0588005	-0.0265824	-0.0549033	0.0279867	0
119.6	-0.0653702	-0.0384842	-0.0387345	-0.0313158	-0.0471314	-0.00050634	-0.0202859	-0.0510409	-0.0495966	0.0173819	0
119.8	-0.0408042	-0.0384485	-0.0613404	-0.05451	-0.0460726	-0.00604836	0.0183546	-0.0395913	-0.00747539	0.00525604	0
120	-0.0407486	-0.0816574	-0.0574764	-0.0384744	-0.00458715	-0.0507448	-0.00266714	-0.0370532	-0.0429105	0.00817373	0
120.2	-0.0601483	-0.0888103	-0.0138428	-0.0371734	0.000531168	-0.064879	0.00949285	-0.0518366	-0.0395884	-0.00663608	0
120.4	-0.0468854	-0.0361331	-0.00693265	-0.0523273	-0.00747537	-0.00340256	0.0549993	-0.0352481	0.014794	-0.00668617	0
120.6	-0.00835377	-0.0399257	-0.0319547	-0.0120192	0.0542285	0.0494798	0.0266956	0.0218744	-0.0213713	0.0219328	0
120.8	0.0165105	0.0157341	0.0214794	-0.0243798	0.0490867	-0.00738225	0.00652184	0.0460756	0.0106909	-0.0138173	0
121	-0.0295104	-0.0124399	-0.0331802	-0.00795394	-0.00729763	0.0145709	0.00325355	0.0153858	0.0157023	-0.0417101	0
121.2	-0.0296395	0.00463417	-0.0212792	0.00209631	0.0270341	-0.00472051	0.0201948	-0.0216458	-0.0145219	-0.0195191	0
121.4	0.011744	0.0583541	0.0426905	-0.00118909	0.0573533	-0.0203596	0.0240789	0.0109591	0.00341579	0.00359369	0
121.6	0.0160635	0.052311	0.0359851	-0.0143309	0.0209352	0.0380897	0.023542	0.055235	0.0133589	-0.0045647	0
121.8	0.0256585	0.0329297	-0.00589215	-0.0140398	-0.00446136	0.0651158	0.0380124	0.0313326	-0.0221063	-0.00928883	0
122	0.0831318	0.0655031	-0.014462	0.0407751	-0.00124286	0.0102684	0.0277742	0.00996461	-0.0049902	0.0107654	0
122.2	0.00457487	0.0228841	-0.0452226	0.0471604	0.0119872	0.00793711	0.00222584	0.0327727	-0.0183597	0.0115929	0
122.4	-0.108589	-0.0390313	-0.0143877	-0.051845	0.00783568	-0.0354152	0.0332751	0.0324849	0.0260383	0.0117642	0
122.6	0.0139823	0.00712513	-0.0293967	0.0142571	-0.0378534	0.0881411	0.0599446	0.0593812	0.0402943	0.0354453	0
122.8	0.153691	0.0703271	-0.041487	0.0823775	-0.129551	0.205795	0.0896335	0.0575486	0.00595054	-0.0225265	0
123	0.137002	0.098474	-0.0116533	0.0505036	-0.153641	0.184742	0.112309	0.083576	0.0330097	-0.0727675	1
123.2	0.136364	0.168691	0.0314211	0.103224	-0.0645592	0.172437	0.0729533	0.189584	0.128585	0.0171507	1
123.4	0.150538	0.231921	0.149683	0.128302	-0.0342952	0.124572	0.0647529	0.157297	0.166744	0.0282042	1
123.6	0.153163	0.280564	0.125351	0.135145	-0.00843714	0.173757	0.184346	0.152643	0.179999	-0.0136498	1
123.8	0.191503	0.359778	0.119494	0.159486	-0.0143668	0.213007	0.224257	0.173728	0.139918	-0.031083	1
124	0.2175	0.356877	0.0718112	0.161543	-0.0337873	0.170598	0.206808	0.134418	0.138756	-0.0411241	1
124.2	0.217173	0.304434	0.011564	0.129777	-0.0368066	0.190381	0.219134	0.0959226	0.102638	-0.0588803	1
124.4	0.22591	0.290273	0.0354653	0.0953452	-0.0507036	0.231287	0.193475	0.0846398	0.0424642	-0.0735467	1
124.6	0.199521	0.228954	0.073585	0.0740959	-0.058957	0.0958232	0.0784305	0.0324492	0.121598	-0.0799254	1
124.8	0.067744	0.116155	0.098142	0.0683073	0.0213119	5.07534e-05	0.0169217	0.0409695	0.129518	-0.058919	1
125	-0.0335073	0.154399	0.043815	0.0415978	-0.00517937	-0.035938	0.0493711	0.0626321	0.036764	-0.0399175	1
125.2	0.00691257	0.129499	-0.0216976	-0.0151711	-0.0399416	0.0130572	0.0382323	0.031214	0.0499628	-0.0608867	1
125.4	0.0126795	0.0475544	-0.016008	-0.055199	-0.0591635	0.0152064	-0.00419571	0.0147906	0.0119267	-0.0660434	1
125.6	-0.0160474	0.0575829	-0.0174896	-0.0298425	-0.0384301	-0.0387581	-0.0207117	-0.000497228	-0.0315947	-0.0522939	1
125.8	0.018253	0.060691	-0.0458507	-0.0043239	0.0170954	-0.0526474	-0.028038	-0.0667096	0.0293479	-0.0519644	1
126	-0.0150298	-0.0434331	0.0245879	-0.0418853	-0.0249139	-0.0819859	-0.0271824	-0.078288	-0.0360789	-0.0432806	0
126.2	-0.0162517	0.0417631	0.0428917	0.0311274	-0.057331	-0.109597	-0.0185976	-0.0245414	-0.00646759	-0.0708691	0
126.4	-0.00348223	0.0594966	0.0698544	0.0390275	-0.0266027	-0.0755705	-0.0524057	-0.0789711	-0.0645307	-0.00914996	0
126.6	0.0416937	0.128621	0.0596649	0.0220804	-0.0284121	0.00374787	0.0574537	-0.0225848	0.000846141	-0.0447659	0
126.8	0.0602564	0.137971	0.0772272	0.0302044	-0.0340881	0.00525803	0.0921894	0.0697272	0.0861675	-0.0735586	0
127	0.0547146	0.0380302	0.113152	0.018102	-0.0153761	-0.0310796	-0.00210398	0.0343473	0.0319802	-0.0262623	0
127.2	0.0665466	0.029881	0.0672787	-0.00811883	-0.033791	0.000251892	0.0231292	-0.0166697	2.14248e-05	-0.0440747	0
127.4	0.0120448	0.00849044	0.0472369	0.00461318	-0.0347978	-0.0267	-0.0165648	-0.0285752	0.00656358	0.0144887	0
127.6	0.0289895	0.0280924	0.0185955	0.0138989	0.0372047	-0.0387803	-0.0116758	0.00375879	0.00834066	0.0620263	0
127.8	0.0218802	0.00948887	0.0523594	0.0298834	0.0757544	-0.08046	-0.0136203	-0.0153521	0.0143347	-0.0161731	0
128	0.0124875	0.00803945	0.0923761	0.0286716	0.0424701	-0.0367126	-0.0195803	0.00176631	0.00854879	-0.0434887	0
128.2	0.0324522	0.0395729	0.023834	0.00924234	-0.0272839	0.0243026	-0.0368892	0.015178	-0.0107642	-0.026344	0
128.4	0.0324957	0.0538957	-0.0397468	-0.00401061	-0.0630143	-0.00622008	-0.0411445	-0.00671391	0.0189018	-0.0599577	0
128.6	0.000439536	0.0403961	0.0255626	-0.0012598	-0.0253764	-0.00641476	0.0144094	0.034132	0.0693805	-0.0573925	0
128.8	-0.0198522	-0.0285105	-0.0398702	0.0296832	-0.00535287	0.0114192	0.00360648	-0.00819547	-0.0317438	-0.0661622	0
129	-0.0032926	-0.00509902	-0.0185292	0.025907	-0.0262767	-0.0152699	0.00496103	0.00917947	-0.0350305	-0.0195537	0
129.2	-0.0191931	0.0747888	-0.0370857	0.0143087	-0.0244851	-0.0613914	0.0018816	0.0349911	-0.0153284	-0.00801003	0
129.4	-0.0238633	0.0588266	-0.0401613	-0.0241214	-0.00209911	-0.0421187	-0.0511852	0.0405354	-0.028066	0.00572419	0
129.6	-0.00533497	-0.009664	0.0249322	-0.034866	0.0195878	0.00683403	-0.0425522	0.032352	0.0170726	0.0232537	0
129.8	-0.00876209	-0.0179163	0.0389689	0.0196197	0.0363489	0.0201662	0.0684543	0.00349374	0.0697696	-0.000971307	0
130	-0.00323537	-0.027103	0.0209308	0.0165506	0.020936	0.0344974	0.0640108	-0.00356498	-0.00647415	0.0144414	0
130.2	-0.0258459	0.00680895	0.0311039	0.00526579	-0.0032846	-0.0270708	-0.03479	0.0108152	0.0101857	0.0148442	0
130.4	-0.0256626	0.0121489	0.014601	-0.0155426	0.0295388	-0.0411773	-0.00352171	-0.0312112	0.0213815	0.0297376	0
130.6	0.0133097	-0.00108245	-0.0132804	0.00827228	0.0257432	-0.00145832	0.0102071	0.0114687	-0.0208784	0.0185415	0
130.8	0.0312005	-0.00258564	0.00978701	0.0151496	-0.0202155	0.00496832	0.00349463	0.027394	-0.0380748	-0.0116783	0
131	0.00650923	-0.0184576	0.028643	-0.012137	-0.0330175	-0.0160835	0.0447794	-0.0714604	-0.0206569	-0.0143122	0
131.2	0.00946349	-0.030979	0.0102677	0.00434547	-0.00721328	0.0139138	0.0413727	-0.0628391	-0.0206455	0.00996742	0
131.4	0.0522466	0.0357838	0.080772	-0.00470179	0.0271594	0.0617519	0.0258823	0.055345	0.0052307	0.0358091	0
131.6	-0.00245458	0.032307	0.0318576	-0.0112614	0.0287731	0.0283888	0.0217656	-0.00446917	0.0249723	0.0223807	0
131.8	0.000548521	-0.00397642	0.0582589	0.00800759	0.0552949	-0.0343572	-0.0351656	0.00510602	0.0257044	0.0167995	0
132	0.0200937	0.00688443	0.0194092	0.00496851	0.0368476	-0.0111033	-0.0394672	0.00908103	0.012283	0.0104745	0
132.2	0.00681842	0.00705568	-0.0378792	0.0152669	0.0059784	-0.00858224	-0.0263298	-0.020448	0.0107966	0.00321682	0
132.4	-0.00758554	-0.0406779	0.00544237	0.0462761	0.0206881	-0.0600575	-0.0766592	-0.00558263	0.010871	0.0149457	0
132.6	-0.0419005	-0.0444708	-0.0288606	0.0175967	-0.00377406	0.00540932	-0.0643843	-0.0565782	-0.0165748	0.0331331	0
132.8	-0.039763	-0.0125759	0.0159673	0.0162641	-0.0153503	0.01423	-0.000406632	-0.0712185	-0.00432212	0.0559409	0
133	-0.0406338	0.0287003	-0.0292078	-0.043987	-0.0106776	0.012674	0.00667275	-0.0154475	0.0136563	0.0271699	0
133.2	-0.0104391	0.00158801	-0.0521228	-0.0241311	-0.0317723	0.0188626	-0.0134999	0.00401171	0.006994	-0.0424221	0
133.4	-0.0126978	-0.0303853	-0.0322637	0.000138242	-0.0209913	0.00714581	-0.0148349	0.0293277	-0.0144701	-0.0519093	0
133.6	-0.00314216	-0.0106223	-0.025673	0.00194357	-0.00143021	-0.00309925	0.0236665	0.0582226	-0.0218087	-0.010744	0
133.8	0.0629018	0.00744257	0.00808865	0.0403557	-0.0213993	0.0117286	0.025626	0.0504887	-0.0182574	-0.0194427	0
134	0.0167102	0.000170242	0.0416454	-0.0139243	0.00039653	0.00899739	-0.0721199	0.0792137	-0.0315152	-0.0381083	0
134.2	0.0100565	-0.0257328	-0.0398102	0.0207172	-0.0518544	-0.0177192	0.0307819	-0.0361554	-0.0266458	0.00440815	0
134.4	-0.0234042	-0.0243589	-0.00501431	-0.0015017	-0.00263037	-0.0259823	0.0296319	-0.0385698	-0.0400736	-0.0402969	0
134.6	-0.0236953	0.000211723	-0.0243101	-0.0539277	0.0143682	-0.0269102	-0.0232795	-0.0289383	0.0244805	-0.0662878	0
134.8	-0.0222668	-0.0106298	-0.0580846	-0.02748	-0.023913	-0.0293465	-0.00111776	-0.0505658	0.0424964	-0.0165507	0
135	-0.0349809	-0.0403157	0.0196824	-0.00344551	-3.19339e-05	-0.00878842	0.00938651	-0.0302887	-0.028432	0.00104912	0
135.2	0.0230527	-0.020508	0.0416227	-0.0612674	0.0427316	0.0237394	-0.0190338	-0.0320851	-0.0167669	-0.0301526	0
135.4	0.0264837	-0.00437872	0.00285641	-0.0230712	0.0366415	0.00936116	0.0139487	-0.0436118	-0.0447943	-0.00768837	0
135.6	-0.055133	-0.0165582	-0.00200104	0.0208134	-0.010815	-0.0151575	-0.0601313	-0.0102559	-0.0287227	0.012516	0
135.8	-0.0427562	-0.0448869	0.00117684	0.0410981	0.0203468	-0.0765505	-0.0557847	0.00475779	-0.0280096	0.00930421	0
136	-0.00548775	-0.0133346	-0.00926223	0.00988499	0.0478352	-0.0571964	0.014923	0.0274537	0.00618369	0.0402632	0
136.2	0.000883703	0.0271016	-0.00712997	-0.0129982	-0.0173799	0.00350324	0.017132	0.0404428	0.0584471	0.0631158	0
136.4	0.005488	-0.00858092	-0.00243085	0.00744113	-0.0576293	-0.0199299	0.0084281	0.0112692	0.0148224	0.0214845	0
136.6	-0.0267178	-0.0332816	-0.0306231	-0.00930798	0.0192979	-0.0303431	0.0393713	0.00876934	-0.0591253	0.00263416	0
136.8	0.0120351	0.00704113	-0.0314718	0.00789683	0.0257935	0.00270998	-0.0717758	0.00465735	-0.00154167	0.0286803	0
137	-0.0164188	0.0242098	-0.0112252	0.00400544	-0.00669198	-0.010515	0.0328495	0.0217095	-0.016358	0.027136	0
137.2	-0.0257556	-0.00147123	0.0313992	0.00834434	0.0273969	-0.027122	0.0536691	-0.0114759	0.0087352	-0.000817651	0
137.4	0.0152773	0.00231369	0.0320476	0.00630048	0.0435867	0.0113395	-0.00625346	-0.00908812	0.0267516	-0.0180065	0
137.6	0.0443122	0.0455642	0.0145209	0.00717803	-0.0212793	0.0445739	0.00717803	0.0386904	-0.00620532	-0.0215704	0
137.8	0.0359072	0.0529669	0.0549702	0.0298722	-0.0426945	0.0255577	0.0182619	0.0309534	0.0139224	-0.0196986	0
138	0.00300027	0.0114176	0.0563296	-0.00460791	0.022836	0.0401718	0.0637026	0.0341559	-0.000207389	-0.00279742	0
138.2	0.0498493	-0.00993298	-0.00710998	-0.00804305	-0.0125476	0.0633718	-0.0242515	-0.0275786	-0.0294008	-0.00835442	0
138.4	0.0614752	0.0478854	-0.00899636	-0.000705158	-0.0417583	0.0933668	-0.0198475	-0.00223115	0.0401127	-0.0266969	0
138.6	0.0160746	0.0773312	0.0270929	0.00492985	-0.0210654	0.0213524	0.0442981	0.0183662	0.0455286	-0.0414071	0
138.8	-0.0242144	0.0262684	0.00252413	-0.00340549	-0.0238726	-0.0296122	0.0327419	-0.0121908	-0.0110567	-0.0114881	0
139	-0.031689	-0.00780531	-0.0440163	-0.0224854	-0.037265	0.0301224	0.0166432	-0.0238944	-0.00225118	0.0503974	0
139.2	-0.017707	0.016747	-0.0166378	-0.0172736	-0.00391048	0.0241909	0.0405594	-0.0146201	0.0225735	0.0521607	0
139.4	-0.00266458	-0.0096605	0.00558541	-0.00429322	-0.017242	-0.0147426	-0.0648685	0.0214164	0.0329335	-0.00287303	0
139.6	-0.0141017	-0.0285308	-0.00350679	-0.0192169	-0.0134778	-0.0487181	-0.0194419	-0.00624191	-0.00622218	0.00556693	0
139.8	0.0161402	-0.0506904	-0.0439564	0.00862923	0.0171278	0.00259885	0.0349558	-0.00733786	0.0139092	-0.019331	0
140	0.0202394	-0.0500445	-0.0322225	0.0175151	0.0138938	0.0279521	0.0166545	0.0185968	0.0363903	-0.0237356	0
140.2	-0.0121785	-0.0149332	-0.0202195	-0.0167906	-0.00620553	-0.00240774	-0.0250795	-0.00902708	-0.0340087	-0.00651168	0
140.4	-0.003646	-0.00854489	-0.045381	-0.0201658	-0.00841513	0.0112328	-0.0479893	-0.0414084	-0.0617761	-0.0412038	0
140.6	0.007411	-0.0359023	0.0205452	-0.0024866	-0.0253711	0.0306206	-0.0211854	0.00738082	0.0632835	-0.0393189	0
140.8	-0.00224973	0.0197474	0.00686266	0.0043743	0.00859176	0.00644307	-0.0197544	-0.0126122	0.0160222	-0.0180772	0
141	-0.0173537	0.0312666	-0.0500786	-0.00320637	0.0128051	-0.0308978	0.023196	0.0123547	-0.0284847	-0.0268781	0
141.2	-0.00528652	-0.0204487	-0.0390763	0.0194582	0.00330955	-0.0415558	0.0119738	-0.000328403	-0.0318949	0.0197749	0
141.4	-0.0120317	-0.0269589	-0.00545866	0.00798632	-0.0103672	-0.0166339	-0.0335803	-0.0414125	-0.0212844	0.0316681	0
141.6	-0.0275572	0.0272052	0.00845174	-0.0258177	-0.0204019	-0.00358903	-0.0161448	-0.00199926	-0.00331531	-0.00773987	0
141.8	0.0129714	0.0534512	0.0364031	0.0221296	-0.00541684	-0.0071391	0.0156303	0.080188	0.00403971	0.017979	0
142	0.0320561	0.040948	0.0246629	0.0629554	0.00308528	0.0430323	0.00407797	0.0821522	0.0234664	0.00392398	0
142.2	0.00619663	0.0107948	0.00810844	0.0413584	0.0408533	0.0152046	0.0743539	0.0186895	0.0394637	0.0305458	0
142.4	0.0603246	0.0583504	0.0246127	0.0317083	-0.0126927	0.0076234	0.0189464	-0.0147795	0.0351186	0.0259649	0
142.6	0.0637631	0.0358907	0.04363	0.0154648	0.012276	0.0178634	-0.00327685	-0.0273177	0.000452186	0.00506671	0
142.8	0.00561929	-0.041082	0.029789	-0.0249972	0.0696469	0.027805	0.020244	0.0128173	-0.00665887	-0.00418325	0
143	-0.00236878	-0.0429767	0.00168854	-0.0294067	0.00838021	0.0263232	-0.00989284	0.0499231	0.035797	0.00542903	0
143.2	-0.00531721	-0.0239134	0.00692003	0.00556426	-0.0157407	-0.014467	0.0374934	-0.0232792	0.0457474	0.0337747	0
143.4	0.000546817	0.0190927	0.0436341	-0.0185777	0.0189917	0.00862124	0.0374201	0.0133393	0.0149184	-0.00281559	0
143.6	0.0173725	0.0277508	0.0296764	-0.0112234	0.0116797	0.0147748	-0.0452037	0.00711926	0.00947011	0.00289587	0
143.8	0.0174234	0.0350078	0.0598987	0.00567816	-0.0237694	0.00667238	-0.00200224	-0.0756031	0.04384	-0.0229152	0
144	-0.0107982	0.0307463	0.0316725	-0.0025495	-0.0252665	-0.0188985	0.0295911	-0.0436027	0.00768826	-0.0215094	0
144.2	-0.0078055	-0.00476195	-0.0554365	-0.00305352	-0.00477055	-0.0234856	-0.0208055	0.0272008	-0.0653513	0.00288889	0
144.4	0.0287656	-0.031883	-0.0502917	0.0103946	0.00132248	-0.00648357	0.00826554	-0.01171	-0.0514133	-0.0211581	0
144.6	0.0131372	-0.0193013	-0.0227442	-0.00709191	0.00573136	-0.0483527	0.0476116	0.031082	-0.0210383	0.00586852	0
144.8	0.0441924	0.00121035	-0.00296837	-0.00064814	-0.0236266	0.00807375	0.021059	0.0243264	-0.00946902	0.00433794	0
145	-0.00531109	-0.00604695	-0.00172296	0.0038844	-0.0337283	0.0290687	-0.0228787	0.00362122	0.00116673	0.00422237	0
145.2	-0.031489	-0.00881179	-0.0593372	-0.0252618	-0.0219864	0.0259911	-0.0144494	-0.0144786	-0.0156719	-0.00210068	0
145.4	-0.00297736	0.00969669	-0.0696273	-0.0344288	-0.0182052	0.0379858	0.00813168	0.00489847	0.00494467	-0.00530103	0
145.6	-0.00272798	-0.000447763	-0.0212803	-0.0218437	-0.0313314	0.0228336	0.0450119	0.0406337	0.0162481	0.016157	0
145.8	-0.0120328	-0.0189415	-0.03975	-0.0404613	-0.0287557	-0.0217206	0.0770265	0.0208626	-0.0616825	0.0333217	0
146	0.0168126	0.0572937	-0.0214552	-0.012951	0.0148157	-0.014818	-0.0593491	0.00281204	-0.0100879	0.0183802	0
146.2	0.0456426	0.00971764	0.0298917	0.0444785	6.88409e-05	0.0510677	-0.0648315	-0.0129162	0.0271516	0.00816904	0
146.4	-0.0241632	-0.053843	0.0216127	0.00104203	0.00480649	0.0394732	-0.00302123	-0.0345876	-0.00412368	-0.00219514	0
146.6	-0.0489248	-0.0206209	-0.00173386	-0.0130557	0.0549071	-0.0336863	-0.0170075	-0.035587	-0.0162933	-0.0108905	0
146.8	-0.0312176	-0.0070265	0.00216956	0.0143646	0.0237202	-0.0658579	-0.0274968	-0.0432031	-0.00800112	-0.0163277	0
147	-0.0585174	-0.0465295	0.0262497	-0.00161241	-0.0429125	-0.0403926	-0.0169057	-0.0315545	-0.0148755	-0.0280381	0
147.2	-0.0387999	0.000522605	0.0692751	0.0255253	0.0356052	-0.0189194	-0.0903756	0.0414016	0.00877656	-0.0395937	0
147.4	-0.0398423	0.00688182	0.0455368	0.0263505	0.0244389	-0.0211046	-0.0144011	-0.0154632	0.0265001	-0.0308616	0
147.6	0.0372598	0.0424689	-0.00828627	-0.00451287	0.00602217	0.0207119	0.0565653	0.0334734	0.0353761	-0.0205956	0
147.8	0.0544827	-0.00829982	-0.0218065	-0.0210585	-0.000661934	0.0299121	0.00723218	0.0118352	-0.0346905	-0.00183786	0
148	-0.0213374	-0.0747518	-0.0523991	0.00417757	-0.0463985	0.00861183	-0.02168	-0.0546364	-0.0541192	0.0112929	0
148.2	-0.0362411	-0.0286711	-0.0392189	0.00172795	-0.0228416	-0.029699	0.0316872	-0.0287544	-0.0102142	0.0201456	0
148.4	-0.00320997	0.0163034	0.0393064	-0.0424683	0.0830808	-0.0664903	0.0291615	0.00141323	-0.0241273	0.0351397	0
148.6	-0.0850649	-0.0613889	-0.0490198	-0.0109078	0.0178209	-0.0166507	-0.0430983	-0.0279067	-0.00967692	0.0263769	0
148.8	-0.0269779	-0.0580756	-0.058209	-0.0266382	-0.00217616	-0.0494694	-0.0388279	-0.0369306	-0.0558214	0.0113555	0
149	0.00211464	0.017826	-0.0278086	-0.0263951	0.00240481	-0.0571903	-0.0371113	-0.0136526	-0.0365116	-0.0224695	0
149.2	-0.0511949	-0.0117577	-0.0169435	-0.0349531	0.00534517	-0.0470103	-0.0312217	-0.0155352	-0.00513182	-0.0159751	0
149.4	-0.0537481	-0.0775477	-0.016528	-0.0246988	0.0169198	-0.0604195	-0.0428146	-0.0162267	-0.0245825	0.0119939	0
149.6	-0.0294751	-0.0549849	-0.0150877	0.0112057	0.023902	-0.044451	-0.0642863	0.010967	-0.0360894	0.0118455	0
149.8	-0.0706611	-0.0370715	-0.0111339	-0.0123517	0.0188303	0.00569626	-0.0249739	0.0081469	-0.00111817	0.0108747	0
150	-0.0147451	-0.0386365	0.00108401	-0.0254377	0.0230526	-0.0136875	-0.0165245	-0.013824	0.0280121	0.0266918	0
150.2	-0.0120804	0.0283179	0.0168415	0.00932126	0.0194057	-0.00259635	-0.0279408	0.00410913	0.0133977	0.0832841	0
150.4	0.0182955	0.0183301	0.0402483	0.00690279	0.0113326	0.0353331	-0.0168002	0.0365572	0.00987152	0.0135358	0
150.6	-0.0212922	-0.02002	0.0551644	0.0390888	0.013636	0.0312501	0.0405005	0.0600909	0.0375667	0.01034	0
150.8	-0.0316593	-0.00315037	0.0616671	0.0752235	0.0361456	0.00392145	0.0339228	0.0365344	0.0666077	0.0820946	0
151	0.0570457	-0.00503962	0.0576267	0.0241389	0.0359336	-0.00646802	-0.0307474	-0.01732	0.0558267	0.0328678	0
151.2	-0.00714659	-0.0571078	0.0285425	-0.00427129	-0.0329999	-0.00503067	0.0111846	-0.00470958	0.00800039	-0.00616117	0
151.4	0.076813	-0.0315709	0.0243075	-0.00303137	-0.0697184	0.0811538	-0.0263454	0.0181932	0.011991	-0.0133421	0
151.6	0.135929	0.115563	0.00205009	-0.0140184	-0.0684145	0.10521	0.079827	-0.0212103	0.0251224	-0.115505	0
151.8	0.102567	0.109336	-0.0207187	-0.00626545	-0.0717625	0.0671632	0.0980765	0.00394056	0.0331974	-0.0791592	0
152	0.0620309	0.0773612	-0.0096356	0.00857365	-0.048427	0.0474556	0.0671551	0.0493905	0.0400524	-0.00510575	0
152.2	0.0541271	0.113058	-0.0129504	0.00787704	-0.0115745	0.0419145	0.0798466	0.0466028	0.0208636	-0.0384752	0
152.4	0.0491263	0.0399725	-0.0459266	0.0199209	-0.0274793	0.0138014	0.00566203	0.0385285	-0.0213042	-0.0528407	0
152.6	0.0303931	0.0120388	-0.00727002	0.0326353	-0.027734	-0.00905313	-0.0283204	-0.0169661	-0.0262085	-0.0654492	0
152.8	-0.0138493	0.0178601	-0.000754382	-0.0205027	0.0456136	-0.0417916	-0.0071442	-0.0199863	-0.0241416	-0.0027191	0
153	-0.0185706	0.00403463	-0.0410711	0.0050197	-0.0205013	0.0229038	0.0181285	0.0215833	-0.0330013	-0.00491454	0
153.2	-0.00297277	0.0547751	-0.0182172	0.00908219	-0.04963	0.0390613	0.0641262	-0.0251918	-0.0126148	-0.0492067	0
153.4	0.00871983	0.0233794	0.0203293	0.000509452	0.0202652	-0.0254241	0.0265425	-0.063477	-0.00466834	-0.00864152	0
153.6	-0.00243113	-0.0767824	0.0201778	0.0167725	0.033182	-0.0265093	-0.0254645	-0.00590031	-0.0237078	0.0369078	0
153.8	-0.0314956	0.0231732	0.0307297	-0.0443797	-0.0102232	0.0325269	0.0780256	-0.0156713	-0.0115752	-0.0361722	0
154	0.0147636	0.0181828	-0.0550479	-0.0306601	-0.0591284	0.0412809	-0.000115611	-0.054129	-0.0352011	-0.0141287	0
154.2	-0.0225822	-0.0443797	-0.0375241	-0.0085463	-0.0213729	0.00771524	-0.00237881	0.00398546	0.0194919	0.0073137	0
154.4	-0.0473301	-0.0349197	0.00386286	-0.00414103	0.0356072	0.0119735	0.0316498	0.0352087	0.0157875	0.0329973	0
154.6	-0.00697839	-0.00127484	-0.0198068	0.000151323	0.0600839	-0.0101876	-0.00797288	0.0301045	0.0108144	0.0361362	0
154.8	0.00131386	-0.00772849	-0.0134681	-0.00351848	0.0431397	-0.0604263	-0.0409336	0.0366155	0.0149002	0.00597894	0
155	-0.0535921	-0.044351	0.0467828	0.0104606	0.0081829	-0.0626566	-0.0532106	0.0133584	-0.0407921	0.00584226	0
155.2	-0.0688104	-0.0724305	0.0195329	0.0634445	0.0125714	-0.0453241	-0.142386	-0.0350782	-0.0405132	0.0349917	0
155.4	-0.0350277	0.017342	0.00593978	-0.0076742	0.0200474	0.0244115	-0.0512645	-0.0137468	-0.0540739	0.0144754	0
155.6	0.00371484	0.00751496	0.0168955	-0.0510761	-0.00170114	0.0199351	0.0215192	0.00969211	0.0357543	0.0100997	0
155.8	0.007899	-0.0223096	0.0370121	0.0213577	0.0121432	0.00079141	-0.0246863	0.0151716	0.0581722	0.0191104	0
156	0.0218283	0.0342277	0.00831645	0.0590512	0.0191765	-0.00889895	-0.0263809	0.032967	0.0403727	0.0414279	0
156.2	0.0575558	0.0680261	1.53889e-05	0.0042416	-0.0101826	2.37399e-06	0.0344588	0.0388838	0.0543695	0.0414018	0
156.4	0.0468	0.0141071	0.0584619	-0.00666543	-0.0242691	0.0343127	0.0230039	0.01625	0.0202287	-0.0199967	0
156.6	0.00826376	0.0228635	-0.0288023	0.0277604	-0.0502888	-0.006986	0.0484157	0.0255513	0.0309082	-0.0322049	0
156.8	0.0331492	0.045012	-0.0423351	0.048891	0.0104843	0.0696991	0.0802104	-0.0258883	-0.00960166	0.0200771	0
157	0.0537573	0.0824981	-0.00708919	-0.0110793	0.00283409	0.0656002	0.0609751	-0.0193336	0.00839306	0.0442556	0
157.2	0.0620425	0.00796918	-0.0109534	-0.0278866	-0.0064049	-0.0131743	-0.0198858	-0.00198664	-0.0292242	0.00392006	0
157.4	-0.00085737	-0.0711728	-0.0167511	-0.0108333	0.007739	-0.057625	-0.0506169	-0.0213466	-0.0544625	-0.045305	0
157.6	-0.0961682	-0.0394679	-0.00513334	-0.0299144	-0.00543281	-0.0670227	-0.013711	-0.0193646	-0.0025404	-0.0300239	0
157.8	-0.0748005	-0.065887	-0.0238765	-0.0203897	0.0291976	-0.0729975	-0.03657	-0.00673633	-0.0752437	0.0185152	0
158	-0.112274	-0.0702423	0.00934409	-0.0556892	0.0529086	-0.0990781	-0.0371878	-0.0216325	-0.0863002	-0.0235496	0
158.2	-0.104134	-0.077229	0.0369108	-0.00751064	0.0101105	-0.0402399	-0.0698083	0.0222149	-0.0681715	-0.0163245	0
158.4	-0.0847795	-0.119214	0.0392533	-0.0147515	0.0190799	-0.0676152	-0.0823864	-0.0758378	-0.0677206	0.00909458	0
158.6	-0.12669	-0.155714	0.0226323	-0.0564242	0.0467283	-0.114661	-0.151301	-0.0998484	-0.0675166	0.0203095	0
158.8	-0.141192	-0.127374	0.0208037	-0.0431997	0.07635	-0.0754012	-0.220718	-0.0237666	-0.0301291	0.0300023	0
159	-0.0492548	-0.0414113	0.00458178	-0.0297643	0.089406	-0.0288541	-0.0890263	-0.0515547	0.0158249	0.0151688	0
159.2	0.0293502	0.0182411	-0.0903694	-0.0359631	-0.0582068	-0.00374468	0.0816773	0.0265708	0.00998093	-0.0251299	0
159.4	0.0737061	0.00237145	-0.0610115	-0.00255613	-0.0977453	-0.0253376	-0.0337974	-0.0359032	0.0251828	-0.0163169	0
159.6	0.0807272	0.0527546	-0.0419707	0.0367065	-0.0534987	0.0617787	0.10725	-0.0379938	-0.0250065	-0.0123645	0
159.8	0.0163461	0.0410424	-0.0205789	0.00712625	-0.0184128	0.0407618	0.0898681	0.0039116	0.0383775	0.00612154	0
160	0.0272452	0.0161151	0.0235221	-0.0120919	-0.00817108	-0.0334829	-0.00232296	0.00739125	0.0669043	0.0205472	0
160.2	0.0669811	0.0604409	0.0285044	0.0288497	0.0185168	0.000562566	0.100024	0.00618685	0.00136949	0.0156107	0
160.4	-0.032916	0.0430861	0.0168362	0.0288753	0.0447735	0.0344736	0.0542635	0.0187245	0.064282	0.0190143	0
160.6	0.015248	0.0154283	0.0596079	0.00621556	-0.000564825	0.0744351	0.0242012	0.0211421	0.00535609	-0.00599179	0
160.8	-0.00823289	0.0193243	0.0384256	0.040357	0.0506593	-0.0113404	-0.0233767	0.0379761	0.0539941	0.0336663	0
161	-0.00224434	0.00990498	-0.00398327	0.0277758	0.00458657	0.0111391	0.0129723	0.0266197	0.00442336	-0.000985171	0
161.2	0.0476411	0.0428679	-0.0519776	0.0235307	-0.0699197	0.057381	0.0434299	0.00823391	-0.0417667	-0.0462923	0
161.4	0.0598951	0.0808847	-0.0425414	0.0175192	-0.0476275	0.0682067	0.0304756	0.0172848	-0.00142861	-0.0535845	0
161.6	0.0210946	0.0442418	0.0516618	-0.0294395	-0.00868675	0.0638868	0.0056088	0.0350327	0.0287455	-0.0272596	0
161.8	-0.00492118	0.0137051	0.0696727	0.00322228	-0.0241495	-0.0117362	-0.0431714	0.0318496	0.0596678	0.0401071	0
162	0.0836459	0.0224858	-0.0290766	0.0363988	-0.0726882	0.142365	0.0830728	0.0153831	-0.00943997	-0.104192	0
162.2	0.0571221	0.0682212	-0.0272754	0.012257	-0.112236	0.0945436	0.068424	0.0529021	0.0483461	-0.0765721	0
162.4	0.0379535	0.0711562	-0.0230781	0.0160081	-0.0728884	0.0473781	0.0749444	0.0769488	0.0413315	-0.0359011	0
162.6	0.0717238	0.0324376	-0.0139085	0.0245201	0.00550286	0.0358283	0.0646377	-0.0113935	-0.0271521	-0.00168282	0
162.8	0.0508798	-0.00392743	-0.0140593	-0.00325443	0.00223811	-0.0113583	0.00439178	-0.0551894	-0.00989306	0.0376994	0
163	-0.00164402	-0.0140058	-0.0749265	0.00467565	-0.0585053	0.0186314	0.0593011	0.0327321	0.0221322	-0.0236102	0
163.2	-0.0107602	0.00727883	-0.0114663	0.0413627	-0.00491651	0.0121028	0.0720075	-0.0347383	-0.0119691	-0.0123529	0
163.4	-0.0830737	-0.0410508	0.0375803	-0.0475423	0.0539321	-0.0579301	-0.01216	-0.0346112	-0.0385224	-0.032148	0
163.6	-0.00349652	-0.0132487	-0.0601912	-0.0548144	-0.0098719	0.0218684	0.0278103	-0.0179981	-0.0536861	-0.0763985	0
163.8	0.0198085	-0.0347124	-0.060975	-0.025831	-0.0218887	0.0344849	-0.00473206	-0.00800032	-0.0211574	-0.0499454	0
164	-0.0155351	-0.0529642	0.0212598	-0.0217137	0.0293455	-0.0750734	-0.0584551	-0.0116725	0.0269096	0.0462739	0
164.2	0.0143129	-0.0104362	0.0198776	0.00373185	0.0275501	-0.099169	-0.0389218	-0.0300787	0.0144784	0.0909966	0
164.4	-0.00903528	-0.031619	0.0184405	0.0172803	0.0193217	-0.0196371	-0.0836529	-0.0141083	-0.0216064	0.0334855	0
164.6	0.0254907	0.0752077	-0.00137957	-0.00618016	0.00599985	0.0646209	0.0428602	0.0233553	0.0164297	0.00133153	0
164.8	0.0231191	0.0545827	-0.0609354	0.00764348	-0.00466494	0.0703988	-0.0463372	0.0689332	0.0390461	-0.00450983	0
165	0.00810592	0.00419476	-0.0327772	0.0209912	-0.000862974	-0.00319748	0.00233786	0.0828889	0.00882456	-0.00739862	0
165.2	-0.0326348	-0.0271675	0.071389	0.00850897	0.0284898	-0.0368997	-0.0334688	0.00982203	0.0263888	0.0303509	0
165.4	-0.0766338	-0.063253	0.0643575	0.0140619	0.0408023	-0.0339557	-0.11234	-0.00697339	0.0486167	0.0685402	0
165.6	-0.0663714	-0.0497713	-0.00863871	0.0153061	0.0283771	-0.0552979	0.0350398	0.0213407	-0.0229589	0.0524474	0
165.8	-0.0384461	0.00433103	0.0759439	-0.055491	0.050539	-0.0311933	-0.0178526	-0.130165	-0.0659283	0.0432337	0
166	-0.00585528	-0.0245198	0.017196	-0.0532064	0.0223312	-0.0228269	-0.051912	-0.0247112	-0.0297385	0.0165446	0
166.2	0.0070502	-0.039553	0.0128634	-0.00333007	-0.0180954	-0.0267255	-0.00650099	0.0338143	-0.0143492	-0.0134595	0
166.4	-0.00707811	-0.00133172	-0.0311742	-0.0165092	-0.0195092	0.00956482	0.00454774	-0.0236322	-0.000214353	-0.0203351	0
166.6	-0.0378552	-0.00956527	-0.0485329	-0.0326625	-0.025499	0.013463	-0.0103285	-0.0333891	0.0217873	-0.0183971	0
166.8	-0.0284173	-0.0457686	0.00218372	-0.00301363	-0.0278054	-0.0166796	-0.0269052	-0.00297453	-0.00269079	-0.000521462	0
167	-0.00477287	-0.0163838	-0.02746	-0.00183847	0.00787295	-0.0265407	-0.0732594	-0.0392285	-0.0646624	0.013804	0
167.2	-0.0830158	-0.0261978	-0.0174654	-0.0196463	-0.0122978	-0.100193	-0.0679013	-0.0527507	-0.0700024	-0.0536991	0
167.4	-0.0166435	-0.0342273	0.0030654	-0.0524626	-0.00146059	-0.0196496	-0.0345609	0.00630804	-0.0271998	-0.0303239	0
167.6	-0.0124603	-0.00875105	-0.0094432	0.0118603	0.0115727	-0.0321127	-0.0342197	0.0124495	-0.00030629	-0.00221456	0
167.8	-0.0381799	-0.0453617	-0.0136218	0.00968971	-0.00992935	-0.0341079	-0.0230506	-0.0392821	-0.0591764	0.000280987	0
168	-0.0201784	-0.0827942	-0.0213629	-0.0431601	-0.00294595	-0.00216479	-0.00944344	-0.0378591	-0.0776994	0.000237447	0
168.2	-0.00888733	-0.0380233	-0.0498525	0.00106804	0.0312861	-0.0403902	0.011245	0.00714886	0.0133721	0.00672878	0
168.4	0.00329954	-0.0173865	-0.0350543	0.0397061	0.00861345	-0.0337054	0.0786233	0.00741189	0.0382784	0.0205709	0
168.6	0.00981055	-0.00618882	0.0168245	0.0159631	0.0187694	-0.0216969	0.0418467	0.0487081	0.00782503	0.00695898	0
168.8	0.0311941	0.039544	0.0758954	0.00649499	0.0219963	-0.0297869	0.0160248	0.0285528	0.0315767	0.0516786	0
169	0.0461597	0.0743809	0.0801199	0.029433	0.0315641	0.00856805	-0.0125211	0.0830138	0.0513723	0.0107282	0
169.2	0.0632953	0.047751	0.0513767	0.0507506	0.0280355	0.0416712	0.00533836	0.0107279	0.0578164	-0.0180989	0
169.4	0.06452	0.042127	0.00726435	0.0611378	0.0233022	0.0398631	0.0598617	-0.108133	0.0385523	0.00290256	0
169.6	0.0259445	0.107453	-0.00882242	0.0323493	0.018493	0.0683965	0.0484811	0.000787974	-0.00341374	-0.0228316	0
169.8	0.0194529	0.0930972	0.0802747	-0.0376705	-0.0273207	0.0969693	0.0273007	0.0502906	0.0444463	0.0136728	0
170	0.0864671	0.0153159	0.0786408	0.0498585	0.0402139	0.0455586	0.100597	0.0662863	0.109535	0.0348375	0
170.2	0.105943	0.0845056	0.0411468	0.0542629	0.000555798	0.0556596	0.0939264	0.0425541	0.0702853	0.0281149	0
170.4	0.00659263	0.0403767	0.00786537	0.0121333	-0.037001	0.0809186	-0.0209796	0.051096	0.0230263	0.00646306	0
170.6	-0.0563936	-0.0445978	-0.0213917	-0.0181155	-0.0251037	0.0434718	-0.0712296	0.0168649	0.000818861	-0.0180489	0
170.8	-0.0343245	0.0256817	-0.0257657	-0.022093	-0.0392495	-0.00125208	-0.0136273	-0.0589391	-0.0363271	-0.0103112	0
171	-0.0333092	0.0554949	0.000663059	0.019308	-0.028918	-0.0125403	0.0231163	0.00235239	-0.0273691	0.0216112	0
171.2	0.0356136	-0.014483	0.0109707	-0.0256521	0.0154395	-0.0474963	0.0319976	0.0974652	0.041717	-0.00566035	0
171.4	0.00597885	-0.0305317	-0.02036	-0.0356148	0.0108733	-0.00216479	-0.0190902	-0.00516414	-0.027834	-0.00338918	0
171.6	-0.0529981	-0.0592862	-0.0593981	-0.0265394	0.0158382	-0.0386715	-0.0499875	-0.072806	-0.0434172	0.0056423	0
171.8	-0.0695933	-0.0613944	-0.0217457	0.0209721	0.0144662	-0.052021	-0.0546917	-0.0497366	-0.0174377	-0.00189727	0
172	-0.0492091	-0.0420994	0.0191611	0.0272561	0.0145859	-0.0364886	-0.0448546	-0.0143326	-0.0435996	-0.0154429	0
172.2	-0.0300319	-0.0589188	-0.0117288	-0.0307612	0.0376254	-0.0868998	-0.0183781	-0.0127947	-0.0533645	-0.0110525	0
172.4	-0.0244001	-0.0313654	-0.0271549	-0.00573356	0.0143005	-0.0501874	-0.0055345	-0.0626492	-0.00986313	0.00539966	0
172.6	0.0260633	0.0366705	-0.0628671	-0.0142509	-0.0361283	0.05178	-0.00601161	-0.0324149	-0.0257367	-0.0270321	0
172.8	0.00193018	-0.0503932	-0.0132541	-0.0213558	-0.0162383	-0.0238475	-0.0447598	0.0284589	-0.0307299	0.00893526	0
173	-0.0125502	-0.0294227	0.00709361	0.0230478	0.0368665	0.0188089	-0.016916	0.0375631	-0.0210968	0.0275556	0
173.2	-0.0265709	0.022904	0.00555729	0.00771301	0.0371514	0.0314433	0.0132578	0.0149869	-0.0104739	-0.0106741	0
173.4	-0.0260808	-0.000296212	0.00963017	-0.0566456	-0.00696357	-0.0300412	0.00840821	-0.00950752	-0.0144827	-0.0426299	0
173.6	0.0284132	0.0360046	-5.92574e-05	-0.0281789	-0.0250728	0.054207	0.0300982	0.0020375	-0.0206578	-0.0397961	0
173.8	0.0112929	0.0293801	0.0610433	0.0247808	-0.00592726	-0.0002433	-0.0024928	0.0689065	0.0280128	-0.00613452	0
174	0.0479518	-0.0116674	0.0519577	0.0232624	0.00850295	-0.0266504	-0.0383798	-0.0375372	0.0461006	0.0527032	0
174.2	0.0774204	0.0241203	-0.0285485	0.0244958	-0.087419	0.0757309	0.030802	0.0305479	0.0027246	-0.0136687	0
174.4	0.0505807	0.030606	-0.0659481	0.0361242	-0.0783958	0.0647901	0.0687279	0.0453285	-0.0123592	-0.0558095	0
174.6	0.0129249	-0.000688755	-0.044012	0.00867389	-0.00237431	-0.0024375	0.0291209	-0.0600799	0.0107917	-0.0375185	0
174.8	-0.00489401	-0.011425	-0.00999183	-0.0383264	-0.0141047	0.00824565	-0.00514276	-0.0619888	0.00878051	-0.0066222	0
175	-0.0128133	-0.0214089	0.0176543	-0.0314342	-0.0151337	-0.0269809	-0.0043999	0.00152638	-0.005497	0.0707927	0
175.2	0.00667799	0.0287037	-0.00288222	0.0038174	-0.000461011	-0.0277035	0.0329449	0.0357808	0.0102392	0.0477193	0
175.4	-0.0246368	-0.0152413	-0.0203414	0.0150581	0.06182	-0.0565652	-0.0494415	-0.00382799	-0.00844346	0.0163788	0
175.6	-0.0529704	-0.0774431	-0.0334587	-0.02576	0.00174756	-0.0315435	-0.0568771	-0.0393005	-0.00803564	0.0193213	0
175.8	-0.0374618	-0.0109021	-0.044547	-0.0121416	0.00498398	-0.00549854	-0.0533942	-0.0665026	0.0238091	0.0103752	0
176	0.00597586	0.0503768	-0.000719557	0.00810357	0.0517454	-0.0147768	-0.0258193	-0.0422742	0.0198826	-0.0179776	0
176.2	0.0295369	-0.0393146	0.0607006	-0.0364381	-0.00574	0.000661145	0.0477552	0.0256157	-0.00639678	-0.0327206	0
176.4	0.00716442	-0.0582179	0.00809712	-0.0125249	0.019986	0.0246572	-0.0156779	0.0241577	0.0117242	-0.0327986	0
176.6	0.0105175	0.0895009	-0.0451097	-0.0073136	-0.0345525	0.0259445	0.0931211	0.0900558	-0.0334922	-0.014114	0
176.8	-0.00695175	0.0341028	-0.0239697	0.0068802	-0.0148722	0.00217226	0.0373671	0.0470169	-0.0080646	-0.0138783	0
177	0.00493248	-0.0205479	0.0381752	-0.024855	-0.00529333	-0.00326914	0.00496368	0.0257315	0.00283632	0.0084826	0
177.2	0.00253878	-0.00169468	0.0420187	-0.00851344	-0.0227153	-0.0237157	0.00795113	0.00570461	-0.0191547	0.00323781	0
177.4	-0.0200019	0.00143667	0.00312741	0.0203705	0.0208939	-0.0346373	-0.0321898	-0.0340892	-0.0109916	-0.0125699	0
177.6	-0.00957139	0.0180546	0.0155406	-0.0292306	0.0720449	0.0130707	-0.012176	0.0127448	0.00694007	0.0363598	0
177.8	-0.0450674	-0.0167629	0.0476336	0.0531699	0.0253071	0.00919334	-0.0340497	0.0145182	0.000181066	0.0310836	0
178	-0.0116912	-0.0331256	0.0713447	0.0199461	-0.0161764	0.00961446	-0.0325512	-0.0146025	-0.0443339	-0.00726841	0
178.2	0.0271687	-0.00343234	-0.0389077	0.00489393	-0.0204865	0.0193376	0.00285744	-0.0304641	0.00855292	0.0308343	0
178.4	-0.0365134	-0.0210098	-0.0850294	0.0125024	-0.0124227	0.0166274	0.0503894	0.016095	0.0707674	0.0264363	0
178.6	0.0192342	0.0419103	-0.0368955	0.011053	-0.0363274	0.0696017	0.0686365	0.0430288	0.0539283	-0.0521981	0
178.8	0.184323	0.145105	-0.0113187	0.0349771	-0.0690402	0.122045	0.0641912	0.00204284	0.0341866	-0.063707	0
179	0.0922451	0.0277036	0.0314921	0.037779	-0.0561163	0.026968	0.0616683	-0.00347593	0.0536606	-0.00618261	0
179.2	0.0124049	0.0175955	0.0219588	-0.0166953	-0.0521762	-0.0230045	-0.00420325	0.0134252	0.0228089	-0.0223264	0
179.4	-0.0248095	0.0227045	0.0436247	0.0157295	0.0144611	-0.0212351	-0.00978622	0.0252893	-0.00139245	0.0374479	0
179.6	-0.0240058	-0.000629577	0.0442099	0.0143552	0.0374286	-0.00322601	0.0216654	0.012785	-4.71359e-05	0.0600865	0
179.8	-0.0321177	-0.0117084	0.0325179	0.0125923	0.0242496	-0.0327929	0.00551492	0.0379597	-0.00878529	0.033595	0
180	-0.036914	-0.00125093	0.0333662	0.0227338	0.0358949	-0.0619762	-0.00378294	0.0490797	-0.0240762	0.0334533	0
180.2	-0.0205472	-0.0289945	0.0102809	-0.00754952	0.0190119	-0.0349808	0.0119471	-0.0225733	-0.0203839	0.027268	0
180.4	-0.0482263	-0.0839411	-0.0274088	0.0117227	-0.0249939	-0.0326136	-0.0581966	-0.0595707	-0.0121721	-0.0224382	0
180.6	-0.0439319	0.0128833	-0.0147459	-0.0194733	0.0809844	0.00175607	-0.0560111	-0.0725006	0.00430561	-0.0244851	0
180.8	-0.0706954	-0.0389745	0.0288664	-0.0439477	0.0756606	-0.0343435	-0.133207	-0.0174708	-0.0195884	0.0310544	0
181	0.00513163	-0.0365164	-0.0168541	-0.0233358	0.0224723	-0.0143661	-0.0358168	-0.0194865	-0.00699005	0.0163521	0
181.2	0.0583731	0.0215636	-0.0360053	0.00516932	0.00406933	0.0355935	0.0725228	-0.0295446	0.000634401	-0.0339043	0
181.4	-0.0163179	-0.01811	0.00839301	-0.0025468	-0.0306607	0.0248323	-0.00728183	-0.00289872	-0.0321013	-0.0416426	0
181.6	-0.0204564	-0.0439045	-0.0279886	-0.0185618	-0.0399254	0.00405068	-0.0375607	-0.03034	-0.034094	-0.0381026	0
181.8	0.0369817	-0.0233785	-0.019814	0.00983462	0.0336461	-0.0389545	-0.0256398	-0.0114907	-0.0411397	-0.00615891	0
182	-0.0103087	0.00806336	0.00496248	-0.0159054	-0.00139889	-0.0287342	0.0516261	0.0364604	0.00269408	0.00477913	0
182.2	-0.0081115	-0.029398	-0.0092729	-0.0209338	0.014482	0.0047387	0.0323907	0.0452423	0.040233	-0.00123617	0
182.4	0.0269088	0.00146825	-0.0393026	0.00895659	-0.00238212	0.0601313	-0.000802278	0.0162425	0.0122563	-0.0047359	0
182.6	0.028534	0.0642934	-0.0653885	0.0338726	-0.0685769	0.054094	0.0216766	0.0142339	-0.00751424	-0.0090701	0
182.8	0.0129313	0.0303643	-0.0579061	0.0249291	-0.0559679	-0.0135926	0.033534	0.0429055	0.023163	-0.0135422	0
183	-0.0121393	0.00509411	0.0196169	-0.0109708	-0.00322339	-0.00238111	0.0178792	0.0307197	0.0209703	0.00840398	0
183.2	-0.000620056	0.00742196	0.0621952	-0.00379055	0.0512801	-0.0289686	-0.0263055	-0.00538211	0.0231732	0.0574708	0
183.4	-0.0163756	0.00543312	0.0391506	-0.0458692	0.0461097	-0.0169736	0.0172226	-0.0176204	0.0394307	0.0704762	0
183.6	-0.00324309	0.0382798	0.0851445	-0.0155589	0.0378139	-0.029334	0.0406376	0.0353133	0.0752356	0.0640145	0
183.8	0.0448278	0.0585177	0.116702	0.0427542	0.049955	-0.0369593	0.0164741	0.073775	0.0648881	0.0457654	0
184	0.0617509	0.0474199	0.0771033	0.0525241	0.0311998	0.0159622	0.000493964	0.056138	0.0553775	0.0461492	0
184.2	0.0609461	0.0469744	0.0715382	0.0468751	-0.00345054	0.0594983	-0.00437811	0.0459066	0.103269	0.065214	0
184.4	0.108516	0.0408991	0.0649178	0.00134895	0.0131897	0.0659402	0.0384862	0.0624239	0.0732775	0.025698	0
184.6	0.122935	0.0956596	0.001734	-0.00378953	-0.042279	0.163942	0.181623	0.0867128	0.0551689	0.0137934	0
184.8	0.189171	0.141611	-0.034754	0.0456391	-0.0811651	0.191241	0.135423	0.0499469	0.068843	-0.059566	0
185	0.198461	0.128615	-0.0287643	0.0841675	-0.0775654	0.151007	0.121421	0.0613465	0.0751611	-0.0438383	0
185.2	0.173038	0.119793	0.00385534	0.0690013	-0.0752171	0.0996061	0.13289	0.145476	0.0712131	-0.00634169	0
185.4	0.147252	0.100574	0.0088867	0.0428108	-0.0489868	0.0525592	0.0797784	0.122552	0.0903858	-0.00389923	0
185.6	0.0351288	0.0149571	-0.0115886	0.0221154	0.0187109	0.0166123	0.0835869	0.00932259	0.101368	0.0909582	0
185.8	-0.0139865	0.012586	0.0684932	-0.047843	0.0242781	-0.0256418	-0.0435475	0.10213	0.0339002	0.0804856	0
186	0.0289573	0.0253048	0.0164722	0.0256611	0.0503255	0.0437268	0.00223713	-0.00409095	0.0511814	0.075008	1
186.2	0.0608984	0.0457242	0.0943162	0.0730089	0.0544621	0.0260194	0.0473201	0.0278189	0.0866355	0.084565	1
186.4	0.0386793	0.0579597	0.141645	0.0410562	0.0361661	0.0191147	-0.0140389	0.0988605	0.122847	0.0820561	1
186.6	0.0372399	0.0804164	0.105133	0.0248502	-0.000901955	0.0837827	0.00388433	0.0607859	0.124039	0.0832173	1
186.8	0.0589817	0.111823	0.155124	0.0498188	-0.0125639	0.0772774	0.0859555	0.0699288	0.135532	0.0937355	1
187	0.018112	0.084575	0.142165	0.067052	0.0667578	0.0261465	0.00122983	0.0989874	0.236123	0.0883906	1
187.2	0.0350897	0.0766549	0.0820232	0.051489	0.0781411	0.0338549	0.018397	0.0795859	0.0963092	0.0785176	1
187.4	0.0587457	0.155291	0.0905088	0.0440069	0.130112	0.0445435	0.0593834	0.0785504	0.0769484	0.043598	1
187.6	0.033911	0.0823516	0.0746414	0.0181614	0.111414	-0.00480531	0.0386165	0.0864047	0.103964	-0.00871639	1
187.8	-0.0194627	0.0187509	0.0649196	0.0134126	0.0262226	-0.0271052	-0.0357546	0.0633053	0.043674	-0.00753375	1
188	-0.0633996	0.0168735	0.0767766	0.0118862	0.0192109	-0.0474886	-0.0947002	0.0399522	-0.0347976	0.0155725	1
188.2	-0.0546839	-0.0680156	0.0573717	-0.0126784	0.0544987	-0.117422	-0.0760825	0.0455038	-0.0180111	-0.0100214	1
188.4	-0.00409136	0.0184883	0.107763	0.0386431	-0.011352	-0.0854906	-0.0363045	0.0152374	0.0709498	0.00594497	1
188.6	-0.0919006	-0.027827	0.131033	-0.00202094	-0.00383407	-0.165734	-0.107053	-0.0248563	-0.0456171	0.0323574	1
188.8	0.0300558	0.00844477	0.177451	0.077716	-0.00216334	-0.0980938	-0.113053	0.080527	0.0378143	0.0141951	1
189	0.0639713	0.0807678	0.15921	0.07628	0.0212911	-0.0381879	-0.0533346	0.0501734	0.124472	0.00715165	0
189.2	-0.0363917	0.0556267	0.108883	0.0103824	0.0403003	-0.0604351	-0.057589	-0.0510565	0.0592405	-0.00735991	0
189.4	-0.0405771	0.00524262	0.115956	0.0428735	0.0175694	-0.0512849	-0.0896199	0.00285679	0.0349503	-0.0135796	0
189.6	-0.0601735	0.00635624	0.112095	0.039078	0.0530486	-0.0582607	-0.0295984	0.0437615	0.0383283	0.0553047	0
189.8	-0.0507524	-0.00317111	0.0949972	0.0440888	0.120166	-0.0598842	0.00327528	0.0388522	-0.0514102	0.0404415	0
190	-0.0238171	0.00324434	0.107415	0.0389324	0.0710651	-0.0937436	-0.0660321	-0.0492395	-0.010511	0.0385696	0
190.2	-0.0193102	0.0114792	0.152395	0.0245078	0.0179268	-0.0391479	-0.0627479	-0.0351553	-0.00249552	0.012039	0
190.4	-0.0610624	0.00649131	0.128095	0.02956	0.0279708	-0.0248685	-0.0550851	-0.0459943	-0.0758717	0.0117046	0
190.6	-0.0585804	-0.0202532	0.0814474	0.025684	0.0673445	-0.0809871	-0.0974269	-0.0843406	-0.0725075	0.0247596	0
190.8	-0.0357093	-0.0513996	0.10342	0.0199416	0.0955005	-0.081351	-0.0961001	-0.0274724	-0.0149148	0.0158287	0
191	-0.131667	-0.0540153	0.0976667	0.064581	0.0879279	-0.0875918	-0.071718	-0.056381	-0.0583971	0.0601555	0
191.2	-0.061097	-0.0789967	0.102041	0.00744772	0.0748371	-0.0795477	-0.0426717	-0.0926543	-0.0175088	0.00279125	0
191.4	-0.0822282	-0.0976152	0.0572632	0.00107893	0.0328408	-0.124724	-0.105732	-0.0636303	-0.0468613	0.00909058	0
191.6	-0.102865	-0.0635643	0.0152891	0.0199668	-0.0314864	-0.0842583	-0.0311066	-0.0363541	-0.038884	0.0160562	0
191.8	-0.0934899	-0.0403051	0.0146053	-0.00544651	0.00309984	-0.0536198	-0.0276496	-0.0463699	-0.0480818	0.0089545	0
192	-0.136083	-0.0513066	0.0408424	-0.0322148	0.0838395	-0.116139	-0.125197	-0.074835	-0.0905209	0.0140682	0
192.2	-0.10661	-0.0224908	0.054718	-0.0293881	0.0501377	-0.103025	-0.00702671	-0.0623185	-0.0195752	-0.00608599	0
192.4	0.0627348	0.0262195	0.00326597	-0.046708	0.0186607	-0.0184338	0.0167926	0.054124	0.0143631	-0.00828958	0
192.6	0.0469289	0.0461204	-0.0211133	-0.0208407	-0.043767	0.0360743	0.0182366	0.0674139	0.0205426	-0.0710478	0
192.8	0.0264344	0.0444796	-0.0363039	0.014804	-0.0617429	0.0588125	0.0292344	0.0139485	0.00466091	-0.0665059	0
193	0.0548965	0.0636831	0.0051914	0.0205184	-0.0319455	0.0325502	0.0352706	0.0015209	-0.00160487	-0.0292042	0
193.2	0.053699	0.0604852	0.0627296	0.0343846	-0.0132079	0.0377133	0.0141036	0.0272894	0.0223538	0.00263366	0
193.4	-0.000951451	0.0001216	0.0772368	0.0499229	0.0224966	0.0484024	-0.0316916	0.0563153	0.0580467	0.0317652	0
193.6	-0.0431186	-0.0148347	0.0761821	0.0298831	0.0804193	-0.0465853	-0.0420868	0.0658135	0.0623739	0.00910438	0
193.8	0.066232	0.0687285	-0.0254443	0.0757333	-0.0162784	0.0202108	0.0306656	-0.00762122	0.00795255	-0.00713969	0
194	0.098985	0.0793731	-0.0928823	0.0136924	-0.0514439	0.0895436	0.0936514	0.0331661	0.00726469	-0.0357747	0
194.2	0.0819528	0.054295	-0.0382469	-0.0106752	-0.0325365	0.0580578	0.13411	0.0126664	0.0144225	-0.0504897	0
194.4	0.0722363	0.0297444	0.0145791	0.00175591	-0.0332762	0.0303312	0.0930033	-0.0208871	0.0174133	-0.0239109	0
194.6	0.0705558	0.0292498	-0.0108473	0.00429622	-0.0537481	0.0352116	0.0167593	0.0167339	0.00433328	0.00868983	0
194.8	0.0238013	0.0262475	-0.0217848	0.0108735	-0.038725	0.00847138	-0.0219883	-0.00194856	-0.0488673	0.0106758	0
195	-0.0877276	-0.0710207	0.0168048	-0.0485508	0.0367307	-0.0112366	-0.0975663	-0.0615487	-0.0595436	0.0158236	0
195.2	0.00295012	-0.0684633	0.0046832	-0.0313451	0.035968	-0.0427846	-0.0641243	-0.0133896	-0.000204729	0.0303033	0
195.4	-0.0153231	0.000146997	-0.0459389	-0.0278289	0.0182228	-0.0135336	-0.0102534	-0.0164872	0.0102416	-0.0023988	0
195.6	-0.0436184	-0.0150457	-0.0561825	-0.0483464	0.00122798	-0.00464768	0.00756649	0.00120884	0.00802887	0.0087985	0
195.8	-0.054155	-0.069151	-0.0172	-0.0440337	0.0552478	-0.0449029	-0.0264062	-0.00763573	-0.0170667	0.0333524	0
196	-0.0747479	-0.0621088	0.0333361	-0.0187586	0.093352	-0.0463033	-0.0333787	-0.0441149	-0.0102604	0.013011	0
196.2	-0.0236617	-0.0267356	0.044698	0.00873686	-0.00508687	-0.0281983	0.0127777	0.0218388	0.0815906	0.00827696	0
196.4	-0.0658091	0.00330123	-0.0346396	0.0350062	0.0186872	-0.0844291	-0.0718956	0.0012572	0.0151351	-0.00142702	0
196.6	-0.0181548	-0.0185135	-0.0623222	-0.0255766	-0.00638111	0.0347591	-0.031715	-0.0221191	-0.0238646	-0.0048447	0
196.8	0.0374067	-0.00382046	-0.0915249	-0.0235226	-0.0744519	0.0514816	0.0441472	-0.00682796	-0.0366943	-0.0377592	0
197	0.0564979	0.0275719	-0.093362	-0.00955684	-0.0892697	0.0457154	0.0902064	0.00558886	-0.0574932	-0.0453802	0
197.2	0.0295659	7.58391e-06	-0.045311	-0.0174815	-0.0610669	0.0363908	0.0233647	-0.0143801	-0.038712	-0.0210866	0
197.4	-0.0393942	-0.0498425	0.0150628	-0.000701834	-0.0384246	-0.0411147	-0.0892875	-0.0340893	-0.00576646	-0.0187295	0
197.6	-0.0732736	-0.0537215	0.0727681	-0.0134374	-0.00114804	-0.00245051	-0.0255422	-0.0221273	-0.0403619	-0.0153947	0
197.8	-0.0763783	-0.0900595	0.0507674	-0.0203429	0.0360111	-0.0304436	-0.0498359	-0.018678	-0.031208	0.014601	0
198	-0.0578263	-0.0929177	-0.0168332	-0.0366983	0.0303363	-0.0411323	-0.0986333	0.00953203	-0.0381134	0.0381341	0
198.2	-0.0282666	-0.0397768	-0.00845715	-0.0194539	0.0330045	-0.0123948	-0.0270955	-0.0347047	-0.0550828	0.0573688	0
198.4	0.000452911	0.00598916	0.00632505	-0.00352086	0.0432693	0.00181828	0.0219528	-0.0390068	-0.0397124	0.0332459	0
198.6	0.00793972	0.0250445	0.0148491	-0.00259905	-0.00270874	-0.0018372	0.000466513	0.0262613	-0.0143496	-0.0108627	0
198.8	0.00305528	0.0568331	0.0608585	0.0298202	-0.0453322	0.00457796	0.0398997	0.0185432	0.00231879	-0.00247783	0
199	0.0293735	0.0753252	0.00942673	0.0537364	0.0329742	-0.000421175	0.0449423	0.0110457	0.0523567	0.0127543	0
199.2	0.0502876	0.0342366	0.0252743	0.046349	0.0139974	-0.0121398	6.43234e-05	0.0255971	0.0702955	0.00661664	0
199.4	0.0859378	0.0396194	0.0501102	0.0563689	0.0235058	-0.000126546	0.0240976	0.0706957	0.0964687	0.00323681	0
199.6	0.128975	0.0614218	0.0626592	0.0626716	-0.000527638	0.0241589	-0.00809705	0.0568517	0.062162	-0.0153274	0
199.8	0.0967864	0.0804768	0.0462211	0.0493031	-0.043374	0.03175	0.0568852	-0.00473518	0.0255783	-0.0277744	0
200	0.0249395	0.0890684	0.00798217	0.0268035	-0.0120761	0.0249722	0.132194	-0.0147922	0.0272659	-0.00618398	0
200.2	-0.000803207	0.022739	-0.00317275	0.00489964	0.0259765	0.00845553	-0.102233	0.0195972	-0.0241284	0.0167173	0
200.4	-0.10134	-0.051403	-0.0319327	0.00346527	0.0270321	-0.0326073	-0.0820265	-0.000212329	-0.0213149	0.0119302	0
200.6	-0.0731183	-0.00694456	-0.04071	-0.0518995	0.00687332	-0.00739652	-0.0253987	-0.0664209	0.00631569	-0.0486921	0
200.8	-0.0756223	-0.0479689	-0.0273649	-0.0654009	0.0207408	-0.0234827	-0.0672888	-0.0258195	-0.00871	-0.0325765	0
201	-0.0460568	-0.0833871	-0.0483966	-0.0305841	0.0415654	-0.0220917	0.0174184	-0.0167704	0.0262814	0.0146664	0
201.2	0.03804	-0.0172679	-0.0666889	-0.0166448	-0.00232856	0.0492819	0.126632	-0.0375166	0.0331718	0.00983906	0
201.4	0.0390567	0.0213599	-0.046644	-0.0034013	-0.0530983	0.0834847	0.0447373	0.0269866	-0.0346937	0.00188793	0
201.6	0.00942972	0.00212719	-0.0511076	0.0339813	-0.00164985	0.0407511	0.00104094	0.0230297	0.0328829	0.023479	0
201.8	-0.00354922	-0.0041841	0.0112255	-0.0263644	0.00328577	0.0112205	-0.0191645	0.0051546	0.00997619	0.0149372	0
202	0.00538786	0.00692745	0.0606394	-0.0142596	0.0255705	-0.0209654	0.0372632	-0.0110767	-0.0672811	0.014059	0
202.2	-0.025606	-0.0163064	0.0429067	-0.00124057	0.0023965	-0.0452932	0.0594908	-0.0127715	-0.055893	-0.00833178	0
202.4	-0.0188884	-0.0402206	-0.0231662	-0.0134102	-0.0396808	-0.0148469	0.0275871	-0.0119616	-0.0361849	-0.0174034	0
202.6	0.0213662	-0.00251966	-0.0207099	-0.0179666	-0.0245245	0.0119642	-0.0131416	-0.0322791	-0.0608983	0.00729889	0
202.8	-0.0343852	0.0227927	0.0481518	-0.0325809	-0.00575348	-0.025381	-0.0441998	-0.0274044	-0.0259725	0.0138418	0
203	-0.0737304	-0.0526735	-0.0274787	-0.00925742	-0.0275296	-0.0151033	-0.00642216	0.0577054	0.0245901	0.000721234	0
203.2	0.0447254	0.00356792	-0.0396948	0.0111246	0.0116811	-0.00271525	0.00187244	0.053044	0.0188075	-0.0607502	0
203.4	0.0552556	0.0144764	-0.0519801	0.00367492	-0.0176875	0.026291	-0.0299091	0.0119226	0.00185779	-0.0521808	0
203.6	-0.0112849	-0.0319587	-0.0544106	0.00573348	-0.04225	0.00573984	-0.050222	-0.00409266	-0.019614	0.00051097	0
203.8	-0.0461896	-0.0568548	-0.0337942	-0.00701205	-0.0113693	-0.0645046	-0.0504411	-0.00754714	-0.0117031	0.0272902	0
204	-0.0642447	-0.0413341	-0.00519404	-0.0213726	0.00190997	-0.0809746	-0.0428371	-0.0446731	0.00565436	0.0198885	0
204.2	-0.0586831	0.00483247	0.0427693	0.0108159	0.00522862	-0.0288201	-0.0432546	-0.0964081	-0.0202957	0.00769133	0
204.4	-0.0421837	-0.0134171	0.0384446	-0.0398001	0.0446102	-0.0220443	-0.08799	-0.0421367	0.0355035	0.0445356	0
204.6	-0.0333408	-0.0558318	0.0576305	-0.0140412	0.0725603	-0.0328986	-0.018605	0.0085716	0.000952203	0.0428906	0
204.8	0.0362831	-0.0203134	-0.00649566	0.0280193	0.0121933	0.0238774	0.0331781	0.036182	-0.0170638	0.0163205	0
205	0.0845856	0.0835296	-0.0286032	0.0436536	-0.0488565	0.0752311	0.0490346	-0.00475648	-0.00905455	-0.0281937	0
205.2	0.0664288	0.106434	0.0465755	0.0325094	-0.0353268	0.0713137	0.0729519	-0.0267334	0.0157666	-0.0396698	0
205.4	0.0541418	0.0407787	0.0519965	0.00129779	3.54345e-05	0.0451331	0.0600762	0.0512184	0.0497751	-0.00950615	0
205.6	0.0357548	0.0637833	-0.00312903	0.0119413	0.0142509	-0.00933453	0.0162378	0.0623149	-0.0150275	-0.0432501	0
205.8	-0.0054958	0.0261407	0.0123968	0.0232691	0.00363246	-0.00410048	-0.00555915	0.0403688	-0.00109107	-0.0301973	0
206	-0.0185836	-0.0302556	0.0337222	-0.00754421	-0.0124426	0.0121374	0.00674067	0.00178911	0.00797572	-0.0072895	0
206.2	0.0287589	-0.0253161	0.0290364	0.000648431	-0.0300012	-0.0134302	0.00208069	0.028344	0.0412904	-0.00624366	0
206.4	0.014043	0.00561072	0.0463479	0.0196415	-0.000783193	-0.00988608	0.0101789	0.021414	0.020035	0.00910678	0
206.6	-0.0333376	0.025702	0.0470159	0.01525	0.069713	0.00260289	0.0325854	-0.0454792	-0.0293054	0.0548646	0
206.8	0.031751	0.0400001	-0.0291697	0.0323649	0.0811929	-0.0492425	0.0107993	-0.0304638	0.0428183	0.0753192	0
207	0.0259186	0.0044777	-0.0476476	0.0147901	0.0247476	-0.0207923	-0.00239312	-0.00288119	0.0452607	0.0323727	0
207.2	-0.0415069	-0.000203958	0.0133681	0.00450802	0.0150761	0.00350113	-0.0213564	0.0384654	-0.0249625	0.00180602	0
207.4	0.0176854	0.0231486	-0.00513968	-0.0449555	-0.00554006	0.0418985	0.043325	-0.0537416	0.0139488	-0.00598526	0
207.6	0.0519581	-0.000846845	-0.0405771	-0.0242073	-0.0386244	0.0667084	0.0587751	-0.0283518	0.00743435	-0.0240565	0
207.8	-0.00236636	0.0108168	-0.0648554	0.00533051	-0.0428284	0.0655265	0.0306109	0.0723827	-0.0381793	-0.0348718	0
208	0.00685488	0.0613449	-0.0857406	-0.0338956	-0.0220461	0.0617443	0.0569687	0.0117305	0.00100498	-0.0110749	0
208.2	0.0422465	-0.0138769	-0.0386033	0.00810422	-0.0168929	0.0162185	0.0364309	-0.0182997	-0.000399008	-0.000240303	0
208.4	-0.0335272	-0.0407204	-0.0643751	0.0200323	-0.057728	-0.0821095	-0.0166562	0.035458	0.012823	-0.0416791	0
208.6	-0.0302723	-0.0937665	0.0170065	-0.0129586	-0.0456366	-0.0526272	-0.0970405	0.0114951	0.00418737	-0.0374123	0
208.8	-0.0365972	-0.0750951	-0.0253873	-0.069976	-0.0386489	-0.0185143	-0.0588387	0.00308927	-0.0194747	0.00816479	0
209	-0.0737304	-0.0342258	-0.0526785	-0.0449166	0.00418857	-0.0444207	-0.0129929	0.00510416	-0.0405396	0.0248432	0
209.2	-0.0525736	-0.0411525	0.0280192	-0.0063776	0.0466481	-0.0252957	-0.050741	-0.0441966	-0.0431371	0.01631	0
209.4	-0.0195408	-0.0388854	0.0275062	-0.0516293	0.012815	0.0281246	-0.0513542	-0.0551874	-0.0255019	0.0211924	0
209.6	-0.0566239	-0.0322193	0.0459321	-0.00549561	0.0419109	-0.016553	-0.0258102	0.00874201	-0.0239848	0.0110016	0
209.8	-0.0195494	-0.019685	0.0391696	0.0241897	0.0502955	-0.0132913	-0.0628366	-0.0582479	-0.0414888	0.00263044	0
210	-0.0695883	-0.0753764	0.0638462	-0.00392882	0.0500376	-0.0220419	-0.0289807	-0.0572078	-0.0516288	0.00677628	0
210.2	-0.054304	-0.0587316	-0.00626311	-0.0358735	0.00309282	-0.0531856	0.00223509	0.00575836	-0.0184693	0.0364896	0
210.4	-0.00637386	0.0452108	-0.0450363	-0.00739077	-0.0272182	-0.0380647	0.0148917	0.0201765	0.023114	0.00620496	0
210.6	-0.00123513	0.0634121	0.0291455	0.0339988	-0.027624	0.0186123	0.0285784	0.0180272	0.0458215	-0.0491228	0
210.8	0.0635272	-0.00233816	0.0203995	0.0273558	-0.0540414	0.0393229	-0.0106015	0.052723	0.0601683	-0.00521871	0
211	0.0256393	0.046773	0.027108	0.0651953	0.0247426	0.0169185	0.000877038	0.0381323	0.0208682	-0.0104067	0
211.2	0.0624143	0.0674381	0.0326669	0.0434381	0.0043396	-0.0196153	0.0526538	-0.00779725	0.00621602	0.00205489	0
211.4	0.103607	0.127429	0.0181608	0.0064181	-0.0131103	0.0389529	0.0498636	0.017355	0.0492845	-0.0248646	0
211.6	0.134332	0.121636	-0.00897825	0.00589102	-0.0107451	0.0735533	0.0495262	0.0690274	0.051099	-0.0225384	0
211.8	0.111376	0.0792936	0.0189011	0.020276	-0.0230968	0.0294298	0.0509814	0.0246353	0.0313941	-0.00375817	0
212	0.0441204	0.0988533	0.052262	0.0183802	-0.0318789	0.0333413	0.0145602	0.000580875	0.0534258	-0.0147993	0
212.2	0.0654295	0.0269394	-0.020988	0.0161324	-0.0297237	0.0826765	0.00803737	0.118419	0.0340564	0.0274081	0
212.4	-0.00693487	-0.0676839	0.0196047	0.0324447	0.0298149	0.0284181	-0.0399613	-0.0491502	0.00239548	-0.000857639	0
212.6	-0.0781325	-0.119861	-0.0449928	-0.0217142	-0.00866694	-0.0630565	-0.0703996	-0.104348	-0.0528348	0.00429045	0
212.8	-0.0351116	-0.105729	-0.049495	-0.0221124	0.0600231	-0.0182481	-0.0368886	-0.0298469	-0.0390716	0.00158995	0
213	-0.0219714	-0.0622536	0.0162118	-0.00683272	0.081839	0.00327864	-0.0172789	-0.00320787	-0.0214788	0.0082629	0
213.2	-0.0862504	-0.063807	-0.00196466	-0.0304237	-0.0358057	-0.0757315	0.00098562	0.00813513	-0.0392244	0.0355665	0
213.4	-0.0619584	-0.0820595	-0.0375909	-0.018065	-0.0248193	-0.0616773	0.0653035	0.0484975	-0.0141427	0.0127011	0
213.6	0.0102487	0.00626195	0.0178364	-0.00548974	0.0453548	0.00707293	0.0366373	-0.00400738	-0.00488459	-0.0168015	0
213.8	-0.0370013	0.0523294	0.00803046	0.0242224	0.0224699	0.0201436	-0.00526347	-0.0135916	-0.00947349	0.00974826	0
214	-0.0948675	-0.036053	-0.00996111	-0.0180284	0.019352	-0.034892	-0.0414311	-0.0132826	-0.00351982	0.0155553	0
214.2	-0.0291351	0.035394	-0.00723626	-0.0189737	0.0237287	-0.0455501	0.00160248	0.016812	0.020725	0.0055496	0
214.4	0.00543728	0.0926798	-0.00149679	-0.00300435	0.00282249	-0.0244384	0.0646843	0.0266586	-0.0223173	-0.000686625	0
214.6	-0.060332	-0.0489148	0.00500502	-0.0355099	-0.0063683	-0.0144895	0.00349183	-0.0350404	-0.0825436	0.0205777	0
214.8	-0.0205431	-0.0561214	-0.00619848	-0.0180033	-0.00368736	0.0218272	-0.11614	-0.0677898	-0.0243093	0.0534528	0
215	0.0382869	-0.0482754	-0.0533935	-0.022425	-0.0183848	0.00294231	-0.0804493	-0.0340013	-0.0344687	-0.040154	0
215.2	-0.0250447	-0.0652022	-0.0435057	-0.0382586	-0.0375166	-0.00555042	-0.0175625	-0.0487955	-0.0259621	-0.0525949	0
215.4	-0.0977728	-0.091258	-0.0106092	-0.0136573	-0.0181929	-0.0425089	-0.0256742	-0.075067	-0.0200329	-0.00666149	0
215.6	-0.0753716	-0.0747116	-0.00953006	0.02683	-0.00506359	-0.0353712	-0.0419844	-0.0407933	-0.0180815	0.0331034	0
215.8	-0.0601586	-0.0435296	-0.00142997	0.0277689	0.022919	-0.017478	-0.0604727	0.0297085	0.000258844	0.0464858	0
216	-0.123461	-0.0909189	0.0237979	-0.0234744	0.0520447	-0.0758475	-0.0922569	0.0229463	-0.0379764	0.012946	0
216.2	-0.0938235	-0.142763	-0.00980999	-0.0610913	-0.0295402	-0.0667629	-0.028245	-0.0559553	-0.112431	-0.0354671	0
216.4	0.0545214	0.00766095	-0.0272717	0.0174378	-0.00238696	0.0292546	0.0560463	0.0351307	0.0584947	-0.0173831	0
216.6	0.0268533	-0.0207523	-0.0311756	0.00253874	0.0318004	0.0370366	0.012362	0.00919756	0.0219498	-0.0162803	0
216.8	0.051726	0.0785161	-0.0102117	0.00152131	0.00630959	0.0407486	0.0355356	0.0193228	0.0458202	-0.00874702	0
217	0.0988915	0.137896	0.0243188	0.0317318	-0.0138586	0.0172585	0.018571	0.0483342	0.0304481	-0.0178475	0
217.2	0.0853405	0.043989	0.0425496	0.0458636	-0.0150884	0.00209981	-0.0134394	0.0368872	-0.0242255	-0.0475236	0
217.4	0.118427	0.134484	0.0615561	0.0562561	-0.0414093	0.077008	0.113764	0.0657216	0.151158	-0.0281826	0
217.6	0.0238343	0.105801	0.0993638	-0.0155425	-0.0440575	0.0199611	0.0317349	-0.0421543	0.0336205	-0.00228968	0
217.8	0.0891618	0.0922683	0.0515994	0.081125	-0.0276232	0.0717896	0.104997	-0.00908938	0.0167522	0.00178754	0
218	0.103828	0.112946	0.0331813	0.0762611	0.0209068	0.077262	0.102292	0.0675447	0.0457901	0.0189392	0
218.2	0.0974601	0.0952845	0.0888343	0.0323992	-0.00718123	0.0435376	0.0263484	0.0805186	0.0713002	0.040954	0
218.4	0.0520768	0.0691042	0.0867501	0.03043	-0.0293217	0.00340448	-0.0277757	0.0414563	0.066657	0.0330598	0
218.6	-0.0235217	0.0724644	0.0131212	-0.000874305	0.054386	-0.0205464	-0.0605829	0.0180141	0.0259573	0.0199783	0
218.8	0.0517675	0.0511296	0.0110961	-0.0218224	0.0699364	0.0431732	-0.00698065	0.0398222	0.0277874	0.0379773	0
219	0.00379215	0.0195713	-0.0143025	-0.0529565	-0.0118172	0.0197582	0.0616319	0.00585889	-0.00912675	0.0170964	0
219.2	-0.0437106	-0.0302614	-0.0517941	-0.00628218	-0.0314906	0.0277186	0.00739496	-0.0161565	-0.0384373	-0.0101455	0
219.4	-0.0377059	-0.0295548	-0.0608035	0.0183696	0.00193117	-0.0137276	0.0135187	-0.0582304	-0.039189	-0.0108045	0
219.6	-0.0504703	-0.0881583	-0.0747703	-0.0180981	0.0186549	-0.0613	-0.00941778	-0.0821096	-0.0666434	0.00790782	0
219.8	-0.103364	-0.160893	-0.0741744	-0.0634129	0.019037	-0.0801527	-0.10166	-0.0779107	-0.0791329	-0.0162127	0
220	-0.069922	-0.0475478	-0.0434292	-0.0603556	-0.00955986	-0.0665587	-0.0430218	-0.0658189	-0.0214906	-0.0664486	0
220.2	0.0780624	0.0762517	-0.0811336	0.00618867	-0.0903495	0.0621623	0.112002	-0.00662924	-0.00217251	-0.0257474	0
220.4	-0.0189677	-0.0773814	-0.0935512	-0.00574508	-0.037404	0.0129996	0.0627125	-0.0488321	-0.0107319	-0.00861557	0
220.6	-0.0642884	-0.0916214	-0.00463526	-0.0533347	0.0437676	-0.0670605	-0.0499042	-0.0180854	-0.0252401	-0.0185563	0
220.8	0.0147371	-0.0327187	0.026074	0.0028468	-0.00241838	-0.0192332	-0.0328651	0.00103761	-0.0310347	0.0136655	0
221	0.00602434	-0.0497432	0.000728509	0.0181102	-0.048643	0.0147695	-0.0178103	0.0173961	0.00302278	0.0229117	0
221.2	-0.08368	-0.0567671	0.0168169	-0.0462666	0.0186621	-0.0454203	-0.0712762	0.0265129	0.0316594	-0.0142561	0
221.4	-0.0675457	-0.0309089	0.0198055	-0.0090435	0.0378814	-0.0627895	-0.0383622	-0.0406182	-0.00884547	-0.00569751	0
221.6	-0.0515153	-0.0573669	0.000120338	-0.028633	-0.0488114	-0.0574838	-0.0355379	0.0292992	-0.034718	-0.00613563	0
221.8	-0.0807975	-0.0550427	0.042023	-0.0201389	-0.021959	-0.0160385	-0.123806	-0.0299925	-0.067269	-0.00641072	0
222	-0.00734855	-0.0205928	0.0133938	0.0130436	-0.0172577	0.0199375	-0.0447067	0.00877594	-0.0108535	0.0168388	0
222.2	-0.00291387	-0.0265392	-0.0358385	0.0233645	0.0027017	0.0249342	0.0154064	0.0414832	-0.0165828	-0.0100765	0
222.4	-0.0767462	-0.0480293	-0.0191532	0.00100191	0.0112842	-0.000777108	-0.026334	0.00111282	-0.0645562	-0.042027	0
222.6	-0.0254756	-0.0183392	0.000894648	-0.0114719	-0.0138314	-0.0290015	-0.0117799	0.000353136	-0.0103231	-0.0126862	0
222.8	0.0484674	0.0178192	-0.00952678	0.0260621	0.0762791	-0.0214608	0.00574075	-0.0285499	0.00593363	0.00271941	0
223	-0.0224245	0.00643613	0.0391978	0.0532463	0.0592051	-0.0122824	0.0303315	-0.0172676	-0.0431303	0.0556024	0
223.2	-0.0237616	-0.0291523	0.0533872	-0.00574581	0.0614438	-0.0339272	-0.0543269	-0.0244783	0.0129794	0.0480829	0
223.4	0.0377289	0.0234815	0.0365117	-0.00948608	0.0228577	-0.0371216	-0.00428501	-0.00318232	0.0179925	0.0556488	0
223.6	0.0831229	0.116642	0.0148903	0.0241484	-0.0205799	0.037838	0.0946913	0.0562447	0.0563663	0.035196	0
223.8	0.0773694	0.0962941	0.00815767	-0.00106331	0.0207596	0.05431	0.0534832	0.0578142	0.1249	0.0077378	0
224	0.0173432	-0.0132709	0.0343259	-0.0262199	0.0446595	-0.0405843	-0.0256041	0.00605593	0.0457734	0.0424781	0
224.2	-0.0355597	-0.0221327	0.0485277	0.009458	-0.0390681	0.0132225	-0.0406812	0.0347334	0.00671795	-0.0111536	0
224.4	-0.0305517	0.0157276	-0.00132962	0.0103306	-0.0141739	0.0277449	0.0377812	0.00941112	0.00459681	-0.0120013	0
224.6	0.0920081	0.0749686	-0.0506219	0.0251817	-0.0228066	0.0994404	0.047972	-0.00750077	-0.00437633	-0.0396551	0
224.8	0.107876	0.0941073	-0.0594174	0.0099005	-0.0485444	0.12052	0.0843502	-0.0149831	0.0118274	-0.0554527	0
225	0.0434132	0.0322595	-0.0293291	-0.0238628	-0.0393089	0.0582924	0.116914	-0.0192511	0.00693899	-0.0311976	0
225.2	0.0539849	0.00355245	-0.0192112	-0.0140093	-0.0272848	0.0291734	0.0471583	-0.00750819	-0.00471631	-0.00920069	0
225.4	0.0515213	0.0861076	-0.0392457	0.00862647	-0.0392404	0.0421252	-0.000752333	0.009047	0.0458756	-0.00417918	0
225.6	0.0307246	0.0673359	0.0208877	0.0123945	-0.0784518	0.0559287	0.0278308	0.0546721	0.0051976	-0.0317143	0
225.8	0.0222816	0.0214394	-0.052284	0.0249063	0.000959808	0.0533335	0.0291262	0.0767028	0.0233978	-0.021271	0
226	-0.0234424	0.00342313	-0.0167219	0.0268239	0.0226569	-0.00712214	0.00188447	0.00682134	0.0305657	0.00241362	0
226.2	-0.0266179	-0.0236982	0.0268209	0.0193475	0.0104735	-0.0608166	0.034013	-0.0317528	0.00795925	-1.95834e-05	0
226.4	-0.0419178	-0.0649405	0.00577342	0.00377935	0.0397377	-0.0606486	0.0126016	-0.000818577	-0.0445982	-0.011478	0
226.6	-0.111152	-0.071695	0.0361294	-0.011412	0.0508016	-0.0563945	-0.102214	0.0122702	-0.0769194	-0.00793981	0
226.8	-0.04847	-0.0333208	0.00887641	0.00406535	0.0332213	-0.0612994	-0.0734744	0.00756535	0.0042292	-0.00196009	0
227	-0.0161486	0.00189456	-0.0235247	0.00962167	0.00121284	-0.0149416	-0.050963	-0.0422135	-0.0256034	0.0131436	0
227.2	0.000310493	-0.03621	0.000396666	0.00661289	-0.00647169	-0.00521309	0.0272741	0.0212173	0.00813039	0.0245069	0
227.4	0.0269804	-0.022561	0.0252201	0.0189183	0.0155166	-0.0324549	0.0260734	0.0346677	0.00459095	0.0111884	0
227.6	0.00317076	0.000301392	0.0578627	-0.0236331	0.0231527	-0.0389905	-0.0352685	-0.038224	-0.0405003	0.0114001	0
227.8	-0.0192239	-0.006776	0.0494298	-0.0524066	0.027195	-0.0215589	-0.0254673	-0.0584916	-0.0132096	0.0247299	0
228	0.0317132	0.0263434	-0.0434846	0.0330945	0.0340108	0.00575808	-0.00801149	0.00649421	0.0176239	0.0187912	0
228.2	0.0126731	0.00173532	-0.0386734	0.0235513	-0.0364037	0.0515695	-0.0534597	0.0558662	-0.0379835	0.0347855	0
228.4	0.0108486	-0.0170908	-0.0115803	-0.021479	-0.0360882	0.0112599	0.0610213	-0.059069	-0.00258891	0.00238212	0
228.6	-0.0181308	-0.0202287	-0.00687105	0.00427311	-0.0106647	0.0185308	0.0383493	-0.0252862	0.0150018	-0.0139606	0
228.8	-0.0286759	-0.0322112	-0.0181628	-0.0109756	-0.0218455	-0.00291494	0.00302954	-0.0229441	0.0368721	-0.00227191	0
229	-0.00312173	-0.0296906	-0.0341399	-0.0437908	-0.0185166	-0.0561314	0.0106858	-0.0464933	0.0340238	0.0112377	0
229.2	-0.0123387	-0.0170733	-0.0235172	-0.029596	-0.000159611	-0.0357277	-0.0532697	0.0370635	-0.0365222	0.0120387	0
229.4	-0.0421161	-0.0317071	0.0138935	-0.0422129	-0.0297511	0.0111411	-0.0504741	0.0020489	-0.0622326	-0.0199199	0
229.6	0.00209254	-0.0250471	-0.0134782	0.0174667	-0.00508375	0.014676	0.0430529	-0.0606313	-0.0502802	-0.0631615	0
229.8	-0.0147848	-0.103524	-0.00989982	0.00248798	0.0105434	-0.0720385	0.0255524	-0.0312498	-0.00860324	-0.0156321	0
230	-0.0499463	-0.0518678	0.042782	-0.0267672	0.0165624	-0.0854364	-0.044174	-0.0110188	-0.00201972	0.0319918	0
230.2	-0.0338695	0.007987	0.0697258	-0.0292705	0.0532329	-0.0371322	-0.083875	-0.012614	0.0154558	0.005503	0
230.4	-0.0065403	-0.0338684	0.0222464	-0.0112046	0.0927937	-0.0183759	-0.0704673	-0.00457848	0.0197564	-0.00369677	0
230.6	0.0190552	0.014109	-0.0320157	0.0333261	0.0532075	0.00540084	0.00779171	0.00744422	-0.0174837	0.0270225	0
230.8	0.101485	0.155093	-0.0145486	0.0571106	-0.0543625	0.106208	0.0981636	0.0655094	0.0375584	-0.0429829	0
231	0.132806	0.16986	-0.035885	0.0338233	-0.0831837	0.261176	0.118347	0.132465	0.0703684	-0.0819319	0
231.2	0.151857	0.141068	-0.0266735	0.0454569	-0.108024	0.193951	0.147266	0.0615383	0.0632643	-0.0595558	0
231.4	0.106897	0.128967	-0.0386006	0.0229212	-0.0973402	0.0567531	0.0701091	0.00397966	0.055743	-0.0219361	0
231.6	0.0669792	0.118847	-0.0196224	-0.0166712	-0.0334472	0.0121641	0.0171297	0.00241576	0.0463916	-0.00850982	0
231.8	0.0380142	0.0481988	0.0177013	-0.00305768	0.0174238	-0.0043769	0.0329152	0.0182489	0.0356707	0.0174539	0
232	-0.0406617	-0.0428717	-0.0201053	0.0264626	0.00421839	-0.0250676	-0.0303808	0.058677	0.0374377	0.057041	0
232.2	0.00267703	0.0164396	0.016441	0.02856	-0.04685	0.00845469	0.0254633	0.00212224	0.0181002	0.0100582	0
232.4	-0.0605035	-0.0318586	-0.0294854	-0.0224724	-0.0145059	-0.0233818	-0.0422842	-0.0143558	-0.00648461	0.0493317	0
232.6	-0.12948	-0.0938718	-0.00151313	-0.0548549	0.0385772	-0.0381721	-0.065144	-0.0432961	-0.0811963	0.00949502	0
232.8	-0.0667389	-0.0683056	-0.0103838	-0.0387201	0.0461358	-0.0462047	-0.0196895	-0.0425608	-0.0784265	-0.0312427	0
233	-0.00844311	-0.0469487	-0.0371018	-0.0176843	0.0251904	-0.0878623	0.00286627	-0.0395499	-0.0398562	-0.00749856	0
233.2	-0.0503437	-0.0715233	0.0167106	-0.0493122	0.00830874	-0.0794239	-0.0351604	-0.060533	-0.0457979	-0.00293898	0
233.4	-0.0451087	-0.0541659	0.00121001	-0.0800308	0.00378689	0.0108305	-0.0911421	-0.0130055	-0.00396903	0.00309943	0
233.6	-0.0376958	-0.0545694	0.0194601	0.0396547	0.041383	-0.000516812	0.0139507	-0.0226057	-0.0577992	0.0144488	0
233.8	-0.0245505	-0.0232949	0.0031417	0.0496038	0.118047	-0.00510314	0.0253874	-0.00228209	0.0335461	0.0113673	0
234	-0.0261397	-0.0377626	0.0248585	0.0208359	0.0467178	-0.0596971	-0.0587467	-0.0367061	-0.00907925	0.0145729	0
234.2	-0.0355814	-0.0659241	0.0454642	0.0142042	-0.0194481	-0.0492024	-0.0855127	-0.0195693	-0.0379608	0.000726036	0
234.4	-0.0152926	-0.0467022	0.0305523	0.0184372	0.0139092	-0.000871108	-0.0318888	0.0305604	0.0277234	-0.00759983	0
234.6	0.00455173	-0.0341256	0.0394427	0.0320178	0.00457826	-0.0606057	-0.0221938	-0.00918279	-0.0271962	0.019654	0
234.8	-0.0491005	-0.0643541	0.047538	-0.00889537	0.0179477	-0.0496666	-0.0889645	0.0218936	-0.0113704	0.0143937	0
235	-0.0819291	-0.0747933	0.070959	-0.0333917	0.0163201	-0.058017	-0.0435933	-0.0608747	-0.038055	0.0461767	0
235.2	-0.106941	-0.0119465	0.0450778	-0.0111633	-0.0027368	-0.0824476	-0.0718678	-0.0835121	-0.0274373	0.0715686	0
235.4	-0.088688	-0.00857909	9.10142e-05	0.00860774	0.0196521	-0.0343929	-0.0356974	-0.0477931	-0.010347	0.0115038	0
235.6	-0.0191698	-0.0435033	-0.0381326	-0.0144891	0.0121434	0.00721639	0.016484	0.00607202	-0.0335816	-0.0237812	0
235.8	0.0608025	0.0059916	-0.0665953	-0.0273528	-0.0498533	-0.00254467	0.010748	0.055057	-0.0338931	0.00360088	0
236	0.0681712	0.0512604	-0.0466782	0.0185888	-0.0485472	0.00332875	0.0594381	0.027971	0.0179283	-0.0327928	0
236.2	-0.0672879	-0.0326239	0.00684259	0.0286882	-0.0216738	-0.0691062	-0.0455094	-0.00730348	0.019877	-0.0286421	0
236.4	-0.0450496	-0.00831128	-0.012943	0.00311868	0.00927651	-0.0255813	-0.0670298	0.0251544	0.0125613	0.02519	0
236.6	-0.0206796	-0.0100822	-0.0244429	-0.0170233	0.0198766	0.00240795	-0.0428212	-0.00947663	0.0142831	0.0121801	0
236.8	0.0140473	0.0295312	-0.0522232	-0.0453414	-0.00247792	0.0261512	0.0585595	-0.013918	0.0207343	-0.0346279	0
237	0.128741	0.113808	-0.0751234	-0.0344817	-0.0537959	0.139176	0.183051	0.0605196	0.0330879	-0.074019	0
237.2	0.193414	0.131481	-0.0243725	0.0518538	-0.0946227	0.241654	0.197724	0.0538754	0.0542406	-0.097607	0
237.4	0.153445	0.15843	0.0214337	0.0932057	-0.0638466	0.186445	0.142389	-0.0106869	0.0811097	-0.0546392	0
237.6	0.168571	0.105596	0.0401556	0.0324739	0.0189253	0.0717226	0.0197524	0.0920202	0.0929202	-0.0240946	0
237.8	0.044006	-0.00117658	0.0591544	0.0012506	0.0408837	0.00895038	-0.0232605	0.053722	0.0257826	0.0329515	0
238	0.00348396	0.00799653	0.0505224	-0.0193037	-0.00569618	-0.0103625	0.0135862	0.0316896	-0.0105996	0.0714846	0
238.2	-0.029252	0.0162301	0.057685	0.0125369	0.0274945	-0.041401	0.0217898	0.00267513	-0.0218889	0.0380456	0
238.4	-0.0778183	-0.0374116	0.0495756	0.0608127	0.0722405	-0.0395644	-0.0122676	-0.0311846	-0.0180195	0.00287346	0
238.6	0.000104571	-0.0141972	-0.0270564	0.010453	0.00594232	-0.00593033	-0.023144	0.0566144	0.0186173	0.0332666	0
238.8	-0.0693712	-0.00617923	-0.0267263	-0.0265589	0.0438144	-0.0740071	-0.0228038	0.00518297	-0.0189901	0.0414126	0
239	-0.0328909	-0.0231525	-0.00355761	-0.0171393	-0.00472689	-0.0308897	-0.0137563	-0.0296756	0.0405468	0.0337054	0
239.2	-0.0580166	-0.0815901	-0.00681113	-0.0210215	-0.0598786	-0.0557276	-0.0537944	0.0383166	0.0325616	0.0202296	0
239.4	-0.0444069	-0.0727443	0.00963307	-0.00112277	0.0282028	-0.0532865	-0.0628293	0.000443168	-0.0255375	0.0262441	0
239.6	0.000430907	-0.012982	0.0069773	-0.0197682	0.0500159	-0.00852802	-0.0230371	-0.0583741	-0.0327201	0.0403404	0
239.8	-0.0117829	0.0242649	-0.0462857	-0.0575857	-0.0674612	0.0381815	0.0205746	-0.000358698	-0.0256949	-0.0105421	0
240	0.0250794	0.0489959	-0.0627758	0.0103245	-0.0457998	0.121053	0.0616749	-0.016285	-0.0283339	-0.0860967	0
240.2	0.014126	-0.0210404	-0.0470744	-0.0139533	-0.0273899	-0.00368968	0.0218206	-0.053964	0.0461748	0.00186389	0
240.4	-0.0299592	-0.061757	-0.0203303	0.000481907	0.0101034	0.00921214	-0.0430495	0.0125099	0.00639115	-0.0262253	0
240.6	-0.0628748	-0.0341506	0.0103075	-0.000640381	0.0440253	-0.053683	-0.0373312	-0.00583938	-0.0377032	-0.0103665	0
240.8	-0.0846678	-0.0371784	0.0319046	-0.0175132	0.0279876	-0.138102	-0.0195452	-0.0777537	-0.0452132	0.00155158	0
241	-0.0585602	-0.0572177	0.0366991	-0.0166631	0.0180387	-0.0941882	-0.014399	-0.0625559	-0.0629966	-0.0120386	0
241.2	-0.0153277	-0.0252559	0.0242526	-0.0328051	0.0443198	-0.0535863	-0.0136416	7.66896e-05	-0.0627728	0.0313277	0
241.4	-0.0533708	-0.0254126	-0.0140244	-0.0358343	0.00978026	-0.0690816	-0.0859581	0.0103905	-0.0308213	-0.0151902	0
241.6	0.0219351	-0.0381431	-0.0549572	0.0631898	-0.0228328	-0.00387178	-0.0825599	-0.0209879	-0.0311433	-0.0430982	0
241.8	0.0800254	0.0591866	0.0107968	0.0565276	-0.00901439	0.0504979	0.0430203	0.00603765	0.0111701	-0.0294942	0
242	0.116522	0.124138	-0.00157112	0.0337197	-0.00131444	0.105373	0.0620803	0.0531311	0.0383709	-0.0577887	0
242.2	0.149567	0.117782	-0.0216924	0.0256588	-0.0414754	0.142307	0.0117109	0.0429975	0.027717	-0.0630505	0
242.4	0.109181	0.111762	0.0400688	0.000388021	-0.0719164	0.128104	0.0561691	0.0275742	0.0568272	-0.0156917	0
242.6	0.0117718	0.0834626	0.0246689	0.00398001	-0.0345904	0.0757086	0.0806346	0.0614151	0.103077	-0.00706305	0
242.8	0.000727806	0.0245278	-0.0118349	-0.0180461	-0.0118189	-0.0170556	-0.0200751	0.0464046	0.046723	0.0106141	0
243	-0.00581816	-0.0197149	0.00318895	-0.0189549	-0.0611961	0.00355796	0.04647	0.0583883	0.0485267	0.00861335	0
243.2	-0.0347405	-0.0178584	3.96334e-05	-0.0491505	-0.038881	0.0135383	0.0223632	-0.0126692	-0.0123514	0.0159944	0
243.4	-0.0209918	-0.035343	0.0017236	-0.0256596	0.026288	-0.0192438	-0.0029935	-0.0517747	-0.038475	0.0445261	0
243.6	-0.010509	-0.0181942	0.0220483	0.0460277	0.0134007	-0.0229715	0.0633386	-0.0552528	0.02575	0.053262	0
243.8	-0.0250569	0.0280358	0.00422353	0.0353153	-0.01779	-0.0191111	0.0493127	-0.0672119	0.0272538	0.0279048	0
244	0.0116018	-0.0416812	-0.0417096	-0.0291454	0.0455087	-0.0523582	-0.0469651	0.00158872	-0.0474602	0.00794664	0
244.2	-0.0269114	-0.0560639	-0.0288187	0.00880748	0.052626	-0.0259155	-0.0336048	-0.0247657	-0.0105525	-0.00795118	0
244.4	-0.0302732	-0.0420178	0.00119576	0.0218176	0.0556122	-0.0552821	-0.0339608	0.0449486	0.00663321	-0.015551	0
244.6	0.0165378	-0.0277246	0.0197414	0.010571	0.033668	-0.0198403	-0.0242579	0.00250172	0.0082752	0.00667442	0
244.8	0.0195127	0.0173054	0.0520142	-0.0121314	0.0203578	-0.0126884	-0.0022403	-0.0376092	-0.0214779	0.021592	0
245	-0.0220074	0.00107487	0.0407948	-0.0322597	0.0304081	-0.0196073	0.0042054	0.0195945	-0.0408866	0.0295712	0
245.2	-0.027841	-0.0709622	-0.0195576	-0.0140244	0.00475686	0.0492446	-0.00585402	0.0215127	-0.00828778	0.0401989	0
245.4	-0.0168742	0.00981699	0.00941696	0.016777	-0.033022	-0.0166777	-0.0474057	0.0183281	-0.0413252	0.00203594	0
245.6	-0.0345639	-0.0380377	-0.0275824	0.0253211	-0.00378008	-0.0062954	-0.0535706	-0.071315	-0.0437064	0.0146364	0
245.8	-0.0149701	-0.0407134	-0.0276334	-0.0072949	-0.00664476	-0.0126294	-0.0293585	-0.0307079	-0.00936013	0.00584021	0
246	0.0102368	0.0145482	-0.000679897	-0.010292	-0.0466412	-0.00766405	0.00171598	0.0147921	0.00659301	-0.0498635	0
246.2	-0.0173935	0.025326	-0.0313642	-0.0146154	-0.0267705	-0.0033836	-0.0188757	-0.00665397	-0.00581232	-0.0646545	0
246.4	-0.0394888	-0.0168567	-0.0579721	-0.0114588	0.0340913	-0.0257931	-0.0279762	0.00405479	-0.0021497	-0.0203642	0
246.6	-0.00240014	-0.0515293	-0.00359697	0.0440965	0.0149348	-0.00767988	0.0480195	0.0260091	0.0156912	-0.00336984	0
246.8	-0.0215706	-0.035768	-0.00637573	-0.0269769	-0.0448508	0.00918594	0.0135223	-0.0200844	-0.0258681	-0.00612623	0
247	-0.0423779	-0.0245074	-0.0153571	-0.070932	-0.0235107	-0.0158564	-0.0030343	-0.0688329	-0.0481707	0.0152486	0
247.2	0.092639	0.1404	0.182001	0.149126	-0.17742	0.068607	-0.191518	-0.511451	-0.453759	-0.192427	0
247.4	0.0893154	0.13439	0.134793	0.110851	-0.216191	0.0164742	-0.201692	-0.604146	-0.434898	-0.279302	0
247.6	0.107229	0.138967	0.119519	-0.000491911	-0.289953	0.00698374	-0.214323	-0.609146	-0.491859	-0.429005	0
247.8	0.137753	0.150603	0.152483	-0.058623	-0.294564	0.0324421	-0.212361	-0.576187	-0.534384	-0.505383	0
248	0.168256	0.16513	0.227208	-0.000589643	-0.189263	0.0780543	-0.190181	-0.54907	-0.513088	-0.440588	0
248.2	0.177496	0.177429	0.281899	0.0698983	-0.0978134	0.11468	-0.171236	-0.547944	-0.487878	-0.343829	0
248.4	0.147749	0.182635	0.258091	0.0427706	-0.146793	0.11596	-0.17965	-0.584361	-0.523439	-0.332915	0
248.6	0.0958693	0.178747	0.181168	-0.0569672	-0.304602	0.0910242	-0.21284	-0.633831	-0.600225	-0.395409	0
248.8	0.053799	0.165014	0.113111	-0.145362	-0.470615	0.0644884	-0.256568	-0.65614	-0.66193	-0.462033	0
249	0.0535434	0.140691	0.11605	-0.138217	-0.543916	0.061034	-0.296549	-0.611008	-0.652094	-0.46327	0
249.2	0.115628	0.109087	0.230954	0.01977	-0.44699	0.098128	-0.31753	-0.47923	-0.53521	-0.35082	0
249.4	0.115628	0.109087	0.230954	0.01977	-0.44699	0.098128	-0.31753	-0.47923	-0.53521	-0.35082	0
249.6	0.115628	0.109087	0.230954	0.01977	-0.44699	0.098128	-0.31753	-0.47923	-0.53521	-0.35082	0
249.8	0.115628	0.109087	0.230954	0.01977	-0.44699	0.098128	-0.31753	-0.47923	-0.53521	-0.35082	0
250	0.115628	0.109087	0.230954	0.01977	-0.44699	0.098128	-0.31753	-0.47923	-0.53521	-0.35082	0

## Sheet: fly3
Time	gamma-L5	gamma-L4	gamma-L3	gamma-L2	alpha-L	gamma-R5	gamma-R4	gamma-R3	gamma-R2	alpha-R	stimulus			Time	gamma-5	gamma-4	gamma-3	gamma-2	alpha	stimulus
0											0			0	-0.00428527	-0.000837682	-0.00126669	0.0109792	0.00526407	0
0.2											0			0.2	-0.00615564	-0.00773786	-0.00240309	0.007481	0.0115817	0
0.4											0			0.4	-0.00976719	-0.00821168	-0.00848745	0.00792761	0.00648044	0
0.6											0			0.6	0.00518339	0.00206288	-0.0192236	0.000232296	0.024355	0
0.8											0			0.8	-0.00822148	0.00527694	-0.0351674	-0.00114324	-0.00882154	0
1											0			1	0.00282835	0.00282573	-0.0126756	-0.00368566	-0.0107293	0
1.2											0			1.2	0.0106753	0.00215269	0.0161437	-0.025258	0.000267775	0
1.4											0			1.4	-0.00831418	-0.00925919	-0.00286047	-0.0350307	-0.00161657	0
1.6											0			1.6	-0.00862078	-0.0176873	0.00707302	0.000170447	-0.00275202	0
1.8											0			1.8	0.00844027	-0.00425905	0.0283864	-0.0130318	-0.00655274	0
2											0			2	0.0174076	0.0115503	-0.000955967	-0.0122392	-0.00147941	0
2.2	-0.0023813	0.0442404	0.0959208	-0.0425952	-0.0161796	-0.0427747	0.00919087	-0.0569469	-0.00538611	-0.016658	0			2.2	0.00692426	0.0120122	-0.0153825	0.025143	-0.00462002	0
2.4	0.00874883	0.010408	0.0677864	0.00174409	-0.0303165	-0.0140662	-0.0249478	-0.0182219	-0.00767378	-0.0178191	0			2.4	0.00241548	-0.012518	-0.00196284	0.0197434	-0.000248425	0
2.6	-0.00502505	-0.00404103	-0.0406742	0.027672	-0.00978659	0.0193677	-0.0223689	0.0664158	-0.0135783	-0.00869472	0			2.6	0.00310152	-0.0106817	-0.0021563	0.00104555	-0.0057751	0
2.8	-0.0219217	0.0314328	-0.00414658	-0.0193868	-0.0181922	0.00915818	0.0415818	0.0219276	0.0417879	0.00460548	0			2.8	0.00667769	0.0175735	0.0277794	0.0132375	-0.0101729	0
3	-0.0152072	-0.0096071	-0.0162563	-0.00270123	-0.0249863	-0.0061934	0.00694206	-0.0429248	0.0169406	-0.0286026	0			3	0.0070477	0.0112223	0.0333402	0.0209764	-0.00369777	0
3.2	0.00482287	-0.0224582	0.0375574	0.00999612	0.00849022	-0.0132176	-0.00765568	0.0449872	0.0107582	0.0180706	0			3.2	0.00297299	0.0106502	-0.0196438	-0.0154907	-0.00912018	0
3.4	0.0350471	-0.010319	0.0429556	-0.0323497	0.0317907	-0.010323	-0.0348914	0.0564995	0.0354196	0.0340496	0			3.4	-0.00612143	0.00144437	-0.000326972	0.0133666	0.00819971	0
3.6	0.0274179	0.000858654	-0.000510676	-0.0543243	0.0268915	0.00452119	-0.0529635	-0.00369988	0.0261265	0.0257536	0			3.6	-0.00950564	-0.00573828	0.006412	0.0212828	0.000187752	0
3.8	-0.00784122	0.0162863	0.0217285	-0.0312455	0.0259201	0.000523768	-0.0038496	0.024155	-0.000977136	0.0599359	0			3.8	-0.0108721	-0.00610034	0.00302422	0.00191432	-0.000884861	0
4	0.0162969	-0.017482	-0.0294323	-0.0157392	0.015755	-0.0376725	-0.0185275	-0.0197876	0.00849633	-0.0056998	0			4	-0.00847422	0.00126003	-0.0038111	-0.00545416	-0.00774197	0
4.2	-0.00713838	-0.0319289	-0.0791285	0.0693907	-0.000313662	-0.013035	-0.0306502	0.00120952	0.035402	-0.00616571	0			4.2	-0.00388757	0.00394329	-0.0341297	0.0087688	-0.0131262	0
4.4	-0.0288571	0.0192729	-0.0264138	0.0386293	0.010966	0.0222066	0.0039508	-0.0260334	-0.0107208	0.0134485	0			4.4	-0.00419092	-0.00979196	-0.0159339	-1.91043e-05	0.00906785	0
4.6	-0.0325361	-0.00859431	0.0157816	-0.00733949	-0.00400991	0.00763173	0.00977127	0.0103995	-0.0175626	0.0359698	0			4.6	-0.000863247	-0.00481547	0.0135876	-0.0113803	-0.00214386	0
4.8	0.00203719	-0.0209943	-0.0155763	0.0268489	-0.027911	-0.0138118	0.0106007	0.0122124	-0.00834021	0.0268197	0			4.8	-0.000813009	0.00324039	0.00839889	-0.00736838	-0.0140213	0
5	0.0273975	0.0172072	-0.0116458	0.0364333	-0.0246254	0.0103593	0.00914506	-0.0344347	-0.0244767	-0.0246511	0			5	0.00743752	0.00904672	-0.00318482	0.00108977	-0.00429589	0
5.2	-0.0142873	-0.0285679	0.041564	-0.0242892	-0.000957174	0.0248816	-0.0179025	0.0389094	-3.95941e-05	-0.0415418	0			5.2	0.0078222	-0.00253963	0.00182089	-0.0133385	0.00998643	0
5.4	-0.0275714	-0.0350959	-0.0177712	-0.010412	0.0381838	-0.0218056	0.0280741	0.0593053	0.0104748	0.00159466	0			5.4	0.012903	0.0166261	0.00569569	-0.0155424	0.00915898	0
5.6	-0.0074186	-0.00276535	-0.0154372	0.0203883	-0.0122084	0.0176817	0.0123602	-0.0169244	-0.0201711	-0.0214752	0			5.6	0.00803004	0.0202879	-0.0157595	-0.0146882	0.0288958	0
5.8	0.0292645	0.00931018	0.0433669	-0.0177345	-0.00970612	0.0165187	-0.00674548	-0.0172502	-0.013093	-0.0433005	0			5.8	-0.0235174	-0.0145404	-0.00456525	-0.0123745	0.0036376	0
6	0.0340191	-0.00122061	0.00851051	-0.0472197	-0.0128349	-0.0175973	0.00267629	-0.00676984	0.0341941	-0.00387441	0			6	-0.0157877	-0.0147373	-0.0153531	-0.00988119	-0.00701429	0
6.2	0.00823949	0.0142184	-0.041158	-0.0135324	-0.0177162	-0.00634153	0.008992	-0.0379844	0.0404329	0.001873	0			6.2	-0.019731	-0.0069906	-0.00270962	0.0108116	0.00157612	0
6.4	0.00163423	0.0393279	-0.0126662	-0.00825746	0.0115778	0.0131941	0.00280551	-0.0399913	-0.00286746	-0.0279031	0			6.4	-0.0274557	-0.00394276	-0.00387627	0.00114257	0.00360156	0
6.6	0.0157285	0.0213939	-0.00636103	-0.0572419	-0.0165645	-0.00423737	0.00547229	-0.00925064	-0.0251079	0.0208794	0			6.6	-0.0248313	-0.021714	-0.0276249	-0.0144678	-0.0207054	0
6.8	0.00320102	0.0224199	0.0219996	-0.00769135	-0.025825	0.0136886	0.0219238	-0.00534976	-0.0310133	0.0202113	0			6.8	-0.00687145	-0.0142202	-0.00426629	-0.00707269	-0.0241141	0
7	0.0046828	0.00905576	-0.0243455	-0.0361738	-0.00161355	-0.0113536	0.0250757	-0.062291	0.0245378	0.0136132	0			7	0.00508474	0.00333864	0.0116678	0.0080947	0.00903669	0
7.2	0.00825358	-0.000944764	-0.0252105	0.0202559	-0.00698332	-0.0533943	-0.0556886	-0.0590662	-0.000119309	0.0299702	0			7.2	-0.0100215	-0.0134551	0.0329775	0.0281587	-0.00330919	0
7.4	-0.00646454	-0.0121121	0.0343577	0.0433586	-0.0291091	-0.013287	-0.085666	0.0321554	-0.0627304	0.0271949	0			7.4	-0.000714514	-0.0090939	0.0267769	0.00939389	-0.00793945	0
7.6	-0.0183308	-0.0151736	0.0341461	-0.0211039	-0.0189202	0.052944	-0.0313175	0.083003	-0.00767482	0.00488354	0			7.6	-0.00837569	-0.000918391	0.0589648	-0.00999838	0.00543934	0
7.8	-0.002337	-0.00124956	0.00413079	-0.0198144	4.56037e-05	0.0221727	-0.0117984	0.0323535	0.0622746	-0.00919856	0			7.8	-0.0168025	-0.00667841	0.0392523	0.0148364	-0.0108607	0
8	0.0191197	-0.0125298	0.0536636	-0.00700602	-0.00960904	-0.0307705	-0.00672109	0.00431844	-0.0280038	-0.0216573	0			8	-0.00969521	0.00573889	0.00627959	0.0214157	0.00968873	0
8.2	0.0110589	-0.0154299	-0.0161135	0.0358498	0.0207399	0.0064738	-0.00754409	0.0476683	0.0312882	0.0132179	0			8.2	0.00845408	0.0240392	0.0283534	-0.00908348	0.0110166	0
8.4	-0.00575689	0.0267674	-0.0132598	0.0293284	0.0131213	0.000657127	0.0388151	0.0485811	0.00486162	-0.000177113	0			8.4	0.0100411	0.0287214	-0.00707718	0.0123206	-0.00051228	0
8.6	0.016412	0.0277276	0.0148087	-0.0239287	0.0260238	0.00406251	0.0306066	0.0022534	0.00375518	-0.00246454	0			8.6	0.0133606	0.0257134	0.0294503	0.0326568	0.0174985	0
8.8	0.0247314	0.0113307	-0.00575432	-0.00030457	0.0385582	-0.00418033	-0.00875901	0.00978869	0.0226359	0.00358937	0			8.8	0.00970142	0.00270904	0.0444324	0.00144797	0.0234748	0
9	-0.0124661	0.0149397	-0.0121059	0.0274424	0.0205366	-0.0149668	0.00306094	0.0198368	-0.0182398	-0.00682887	0			9	-0.0109063	0.00224427	0.0277876	0.00517434	0.0281568	0
9.2	-0.0258376	0.0122674	0.0130473	-0.0532948	0.0140599	0.0274955	0.0307365	-0.046971	-0.0202441	0.00251701	0			9.2	-0.00624375	0.0217458	0.0205749	0.0140046	0.0161839	0
9.4	-0.00615861	0.0455613	-0.0030897	-0.0020968	-0.0195332	-0.0244523	0.0375235	-0.0183134	-0.0129241	-0.0221116	0			9.4	0.00208688	0.0103208	-0.00310465	-0.00504541	0.00454564	0
9.6	-0.00216656	-0.0118622	-0.0106129	0.0400877	0.00762761	-0.00300109	-0.00201468	0.0100755	0.00263773	-0.061949	0			9.6	-0.00451655	-0.0094878	0.00743397	-0.00217074	0.00101386	0
9.8	-0.0215422	-0.0289138	0.0053801	-0.00233454	0.00380519	0.0178626	-0.00192661	0.0560924	0.0110345	-0.0313623	0			9.8	-0.00053089	-0.00830197	0.0170493	0.0240729	0.0115748	0
10	-0.000578224	0.00268881	-0.0204363	-0.00306148	-0.00263693	0.00294125	0.0049776	0.031691	0.0347891	0.00204049	0			10	0.024259	0.0212927	0.0429952	0.0205365	0.0347224	1
10.2	-0.0112595	0.0197524	-0.0662387	0.0457727	-0.00758052	-0.0069608	-0.0173904	-0.0436956	0.00874152	0.00694719	0			10.2	0.130267	0.113952	0.0954195	0.059381	0.0524318	1
10.4	-0.0461821	0.0055997	-0.0219994	0.0218721	-0.00888112	0.0164605	-0.0264362	-0.04046	-0.0422006	0.00833873	0			10.4	0.188392	0.180278	0.131956	0.0822121	0.0533488	1
10.6	0.0160935	-0.0312674	0.0641472	-0.0315961	0.0344397	0.0394139	-0.0101247	0.0077417	0.0184128	-0.00905351	0			10.6	0.174651	0.157338	0.113608	0.0631012	0.0563729	1
10.8	-0.0427994	-0.0306181	-0.0142211	0.0208672	-0.0317889	-0.0211401	-0.0033862	-0.0112886	0.0188696	0.0135714	0			10.8	0.161011	0.120552	0.0946615	0.0791888	0.0445782	1
11	-0.00653135	-0.0308484	-0.0111949	-0.0381036	-0.0244858	0.00520993	0.0264495	-0.018072	-0.00743957	-0.0054303	0			11	0.145379	0.160411	0.106092	0.0990519	0.0258151	1
11.2	-0.0152666	-0.0508033	0.0370001	-0.0495681	0.00308705	0.0139038	0.034285	0.00360325	-0.00549749	-0.0263974	0			11.2	0.162884	0.140462	0.114691	0.0703146	0.0342367	1
11.4	-0.0169133	-0.0155791	0.0135519	-0.0112415	-0.0156444	-0.0226934	-0.00191561	-0.0088684	-0.0178915	0.0614336	0			11.4	0.135159	0.12372	0.0733703	0.0507516	0.0161178	1
11.6	0.0364948	0.003513	-0.015344	0.0169512	-0.0288022	-0.0127693	-0.0280832	-0.029529	-0.0191672	0.101833	0			11.6	0.129127	0.127446	0.0548163	0.0570192	0.0254421	1
11.8	0.0212516	-0.0565246	0.00507672	0.0514935	0.000785785	0.017358	-0.00510133	0.0139183	0.0132864	-0.0209883	0			11.8	0.117456	0.0904358	0.0687443	0.0529493	0.0394735	1
12	0.0102715	-0.00278048	-0.0257362	0.00085337	0.0272931	-0.0114837	0.0158983	0.042916	-0.0227551	-0.0129434	0			12	0.0867901	0.0920265	0.0555952	0.0381915	0.0195577	1
12.2	0.0362918	0.0612465	-0.0191055	-0.0193503	0.0159241	0.0100915	-0.0143171	-0.0402668	-0.00888257	0.0383333	0			12.2	0.0860664	0.0800485	0.0397182	0.0367059	0.00787119	1
12.4	0.012087	0.0277483	0.00401836	-0.00207389	0.00173505	-0.00961098	-0.032531	-0.0254045	-0.00194047	-0.00362002	0			12.4	0.109751	0.0939715	0.0679453	0.0422853	-0.00218167	1
12.6	0.00395925	0.0458076	0.00848664	-0.00663865	0.00321683	-0.0141532	0.053436	0.0324449	0.0335408	-0.0185175	0			12.6	0.116123	0.0919884	0.0418392	0.0280198	-0.00571863	1
12.8	0.00936241	0.0315158	0.0066714	-0.00281125	0.0179423	0.00557914	0.0768758	0.028059	0.032094	-0.00809806	0			12.8	0.0894875	0.070361	0.051246	0.0223422	0.0057433	1
13	-0.00559857	-0.0381705	0.00625165	0.031595	0.00863475	-0.00463241	-0.0272849	0.00542859	-0.0162073	-0.0110832	0			13	0.0791864	0.0806735	0.091718	0.0238575	-0.00272208	0
13.2	0.0131065	0.0117206	-0.00244371	0.0446985	-0.0248016	-0.0132431	-0.0388653	0.0144038	0.00332019	0.0274048	0			13.2	0.0821839	0.0747165	0.0797361	0.0256534	-0.000746016	0
13.4	0.0263334	-0.00979428	0.00176829	0.039241	0.000901222	0.00123285	0.00942358	0.0130877	-0.0118499	0.00563992	0			13.4	0.080002	0.0864556	0.0466977	0.0145418	-0.000712262	0
13.6	-0.025226	0.0100215	0.00377328	-0.0216386	-0.0308012	0.00479488	-0.0363503	-0.0148846	-0.0327994	0.00398989	0			13.6	0.0659737	0.0762376	0.0566036	0.0152799	0.00160261	0
13.8	-0.0130282	0.0117726	-0.0265047	-0.0605152	-0.0297558	-0.0101444	-0.0374402	0.0211116	0.0036914	-0.0146505	0			13.8	0.0592477	0.0657806	0.0449842	0.0121734	0.00663842	0
14	0.0058637	-0.00557563	-0.0336611	-0.0403706	0.0193726	-0.000514498	-0.00717372	0.0100906	0.00756624	-0.045599	0			14	0.0543271	0.0699091	0.0338536	0.00614132	-0.00675782	0
14.2	0.00648662	0.000957109	-0.00396474	-0.0491294	0.0275154	0.0349845	-0.00573314	-0.0259108	-0.0231448	-0.0323898	0			14.2	0.0518068	0.0441686	0.0362183	-0.0159327	-0.0167354	0
14.4	0.0176739	-0.00274883	0.0054522	-0.0636282	-0.00322182	0.0244709	-0.0036585	-0.00288756	0.0128781	-0.0088607	0			14.4	0.0489782	0.043043	0.0204993	0.0146642	-0.00785006	0
14.6	-0.0242042	-0.0354428	-0.0106851	0.035456	0.0102089	-0.03298	0.00621093	-0.03417	0.0555475	-0.0317736	0			14.6	0.0546959	0.0334506	0.0185921	0.0380259	-0.00970395	0
14.8	-0.017449	-0.014943	-0.00619425	0.0294776	0.0243587	-0.00136948	0.0303858	-0.0189824	-0.00922358	0.00905724	0			14.8	0.0341042	0.0305213	0.023601	-0.0257345	-0.0168749	0
15	-0.0329824	-0.0282155	0.0289678	-0.0279567	0.0292795	-0.0183031	0.0144131	0.0347123	0.0151732	-0.0011497	0			15	0.0298034	0.0420933	0.0273154	-0.0136645	-0.00476206	0
15.2	0.000682556	-0.0288192	0.00889829	0.0168786	0.0265044	-0.0260268	-0.0283929	-0.00183137	-0.008811	-0.0289775	0			15.2	0.0448947	0.0306376	0.0171362	0.00895021	0.00429624	0
15.4	0.0231198	0.00416809	0.01705	0.0584351	-0.00200377	-0.0073874	-0.0182859	-0.0448535	-0.047821	0.0175438	0			15.4	0.0451372	0.0183032	-0.00520106	-0.0360001	0.00351713	0
15.6	0.00406938	0.020883	0.0513093	0.0226402	-0.0150554	-0.00992084	0.00758535	0.0107891	-0.0101617	0.0310968	0			15.6	0.027845	0.0129773	0.00139537	-0.0167723	-0.0151208	0
15.8	0.0109002	0.00648675	0.00678231	0.00483828	0.0077808	-0.0122827	-0.0126776	0.06374	0.00335523	-0.0345534	0			15.8	0.00955867	-0.00789401	0.0154587	0.0114626	-0.016985	0
16	-0.0115081	0.00167016	0.000521065	-0.012964	-0.0275536	0.00214797	0.0242429	0.0247	-0.027158	0.0481769	0			16	-0.00194076	-0.0106263	0.00950411	-0.00963127	0.000792874	0
16.2	0.0384145	0.037459	0.00213288	-0.00417845	-0.0461369	0.00667669	0.0462089	-0.016427	-0.0350379	0.0577071	0			16.2	0.00512198	0.00149986	0.00485867	-0.0170277	-0.0026009	0
16.4	0.0283966	0.0240779	0.0243555	-0.0173749	-0.0343109	0.0582954	-0.0117021	-0.0329189	0.0327242	-0.0308949	0			16.4	0.00324361	-0.0123241	-0.0219014	0.00820628	-0.00829762	0
16.6	-0.00624342	-0.00105625	0.028454	0.00694314	-0.0285436	0.0339812	-0.000418978	-0.0377187	0.0631509	-0.0124323	0			16.6	0.00110251	0.018821	0.00311785	-0.00637293	-0.0163209	0
16.8	-0.00872308	0.0181552	-0.00709843	0.0240516	-0.0184163	-0.00764928	0.0434236	0.0266946	0.0177435	0.0346067	0			16.8	-0.00632099	0.00319582	0.00934594	-0.0189143	-0.0259593	0
17	-0.00290421	0.013212	-0.0290886	-0.00144864	0.0115136	0.000768296	0.00736362	0.0802121	-0.007585	-0.00926579	0			17	0.00432059	-0.0132899	-0.0106326	0.0184528	-0.029767	0
17.2	-0.0040737	-0.0421677	-0.00746403	0.0124243	0.018173	-0.0237611	-0.0378607	-0.0129108	0.0069666	-0.0176692	0			17.2	-0.00663625	-0.00905322	-0.00455056	0.0127584	0.00734581	0
17.4	-0.0260603	0.00148875	-0.0106212	-0.00584723	-0.00845332	0.0520046	-0.0733993	-0.0426485	-0.0161199	-0.0176834	0			17.4	-0.0149495	-0.0162945	-0.0243938	-0.00306495	0.0040567	0
17.6	-0.00476962	0.00839125	-0.0320902	-0.00623662	0.0184002	-0.0101981	-0.00565238	-0.0812311	0.0229777	0.0698248	0			17.6	-0.0216032	-0.00750725	-0.0350828	0.0135471	-0.0164529	0
17.8	0.00660612	0.0322248	-0.0435946	0.00408951	0.00992852	-0.046195	-0.00677394	-0.0549404	-0.00734564	0.0213919	0			17.8	-0.0258247	-0.00817749	-0.0161193	-0.0287963	-0.0150913	0
18	0.0107199	0.026699	-0.0363803	-0.0358998	0.000238292	-0.0167915	-0.0230903	0.011386	-0.0286424	-0.0469847	0			18	-0.0195823	-0.0112241	-0.0119155	-0.0335778	-0.00306839	0
18.2	0.00560104	-0.00946526	0.000230826	-0.0490984	0.0107089	-0.00899198	-0.00598636	0.0221978	0.0151613	-0.0166539	0			18.2	-0.00371503	0.00132774	-0.00260746	-0.0113074	0.00113311	0
18.4	-0.0146019	0.00365929	0.0269878	0.0020925	-0.00604926	-0.0261018	-0.0155611	0.00494616	0.00608213	0.00365511	0			18.4	-0.00830604	-0.0145	0.0080069	0.00371427	0.00270475	0
18.6	-0.0041445	0.00649116	-0.0271033	-0.0254188	-0.0120216	-0.0370714	0.000712931	0.0336905	-0.0379765	0.0182907	0			18.6	-0.0152017	-0.0264587	-0.000357668	-0.00913016	0.0191979	0
18.8	-0.0255176	-0.0236302	-0.0636496	-0.0257712	-0.0210772	0.00699686	-0.0140285	0.0249521	-0.00352163	0.0377148	0			18.8	-0.00858493	-0.00393069	-0.00595973	-0.0136757	0.00651858	0
19	-0.0136757	-0.00945426	-0.0174847	-0.0191438	-0.0178079	-0.00410182	0.0116154	-0.0126352	0.0127149	0.0230629	0			19	-0.00823141	0.00555388	0.00874879	0.00940755	-0.00294753	0
19.2	-0.0121683	-0.0234458	0.000127154	0.000707365	-0.0426084	-0.0187518	-0.0329001	0.00110933	-0.0282923	0.0207006	0			19.2	-0.00274156	0.00790366	0.000116238	-0.0239705	0.00814837	0
19.4	-0.0135807	-0.042404	-0.00226273	0.0218763	0.00544822	0.00742843	-0.0203338	0.0153082	-0.0388094	-0.0139363	0			19.4	0.0137011	0.0028724	-0.007618	-0.0134897	0.00430691	0
19.6	-0.00966454	-0.00567096	0.0247532	0.0438455	0.0863091	0.0311755	0.0582115	0.00188331	0.0135301	-0.0554574	0			19.6	0.00244089	0.00475578	-0.000639265	0.00745783	-0.00775203	0
19.8	-0.0129833	0.0161378	0.0196241	0.0672104	0.0236885	0.0101344	0.00625576	0.0215011	0.0570736	0.00674361	0			19.8	0.00465223	0.00424993	0.0148102	0.0201449	-0.00228414	0
20	0.0367789	-0.0177328	-0.0181526	0.0242747	-0.0323328	-0.034399	0.00383689	0.0187185	0.0606527	0.0528242	0			20	0.0166513	0.0104253	0.0132179	0.0101931	0.0145694	0
20.2	-0.00146142	0.00186202	0.00480144	-0.0253592	0.00455116	0.00435033	0.0431703	-0.00919626	0.011177	-0.0150482	0
20.4	-0.00616387	-0.00984119	0.063076	-0.0171634	0.0176581	0.00635521	0.0499041	0.0191656	-0.0226028	-0.00512349	0
20.6	-0.0161688	-0.0353217	0.00381371	-0.00397027	0.0236831	-0.00401244	0.00730542	0.0240964	-0.0222034	0.00261668	0
20.8	0.0041027	0.00749763	-0.014553	-0.00861457	0.0521001	-0.0115095	-0.0183816	0.000540089	0.0376207	-0.0310129	0
21	0.0657956	0.0514512	0.0436884	-0.00459302	0.0310487	-0.0252976	-0.0223736	0.0024215	0.0725102	-0.0125321	0
21.2	0.0154876	-0.00458782	-0.0427227	-0.0023053	-0.0153344	0.00766566	-0.0432211	-0.0125982	-0.0274312	0.00661012	0
21.4	-0.0170186	-0.0242003	0.0624975	0.000678223	0.0615496	0.0155395	0.0236647	-0.0114307	-0.0421354	-0.0269071	0
21.6	-0.0197137	-0.0219715	0.0157216	0.00415427	-0.000128585	0.0397848	0.0381871	-0.016594	-0.0386103	-0.0115723	0
21.8	0.00556349	0.0124764	-0.00187059	0.047735	-0.0280727	0.0424412	0.0252309	-0.0360141	0.00410257	-0.0551488	0
22	0.00710381	0.0160322	0.0510152	0.0528497	-0.0239937	0.0246245	0.0166796	-0.00757769	0.0207744	-0.0576386	0
22.2	0.0055011	0.0242195	0.0209091	-0.0057171	-0.0211239	-0.00371588	0.020391	0.0235946	-0.00370054	0.0312623	0
22.4	0.0348234	0.0565838	-0.0427846	-0.0043542	0.0289658	-0.0232078	0.0357102	-0.0094359	-0.0201972	0.0680622	0
22.6	0.00717233	-0.0226259	-0.0169182	0.0454719	-0.00486435	0.0144614	0.0199627	-0.00829358	-0.0602227	0.0390558	0
22.8	-0.0274253	-0.0127863	-0.00851496	-0.0804638	-0.0310139	0.0133384	0.00606399	0.00634773	-0.0138216	-0.024827	0
23	0.00632006	-0.0270708	-0.0472999	-0.0428307	-0.00198571	0.0297797	-0.0109328	0.0280181	-0.0305827	-0.00965347	0
23.2	0.00019496	-0.0134719	-0.0470207	0.0213667	0.0095988	0.00486583	-0.00491099	0.0351981	0.0104142	0.0546452	0
23.4	-0.040962	0.0275734	-0.00116883	0.004053	-0.000925528	-0.0101565	0.000403401	-0.00556222	0.0399374	0.0189873	0
23.6	-0.033848	0.0161843	-0.00317154	-6.71917e-05	-0.0100259	-0.00210661	-0.024212	-0.0468892	-0.0448883	-0.0297735	0
23.8	-0.01164	-0.0133599	-0.0301511	0.0162489	-0.0179089	-0.0394712	-0.0345017	-0.0168767	-0.0643342	0.0470697	0
24	-0.0118431	-0.0151181	0.0448383	0.0356802	0.0207112	0.00946486	-0.0144169	0.0204218	0.0178924	-0.00410151	0
24.2	-0.00465895	-0.037892	0.00323402	-0.0203443	0.000433127	0.00419166	-0.0456117	0.0270203	0.0257271	-0.0260944	0
24.4	-0.0170201	0.0255421	0.0582875	0.0852687	-0.0190533	0.0070582	0.0305125	-0.00411253	0.0285059	-0.0112286	0
24.6	0.00131155	0.0394278	0.0917362	0.0300086	-0.0344558	0.0260081	0.0159831	-0.0408582	0.0387035	-0.049808	0
24.8	0.0424585	-0.0287065	0.00951436	-0.106111	-0.0190075	0.0150231	-0.0429491	-0.0438388	0.0302837	-0.0548725	0
25	0.0272026	-0.056566	-0.0193493	-0.0333885	0.0184002	-0.0219031	0.00484579	-0.00545585	0.0429612	-0.012893	0
25.2	-0.019065	-0.0504533	0.0184045	-0.0383332	-0.00747859	-0.051109	-0.0356891	0.0109962	0.0484473	-0.0524243	0
25.4	-0.00210321	0.0147523	-0.012786	-0.000612583	0.0173523	-0.0378746	-0.00269191	-0.0661006	-0.0543618	0.0494581	0
25.6	0.0146154	0.0221528	-0.0213265	-0.0257592	0.00707105	-0.00430737	-0.0309988	-0.0281616	0.0392782	0.0464383	0
25.8	-0.00932708	-0.0134067	-0.0585159	-0.0251192	-0.0200503	-0.0278651	-0.0188891	0.0166776	0.0579909	0.00726972	0
26	-0.0472523	-0.00428299	-0.0504575	0.00527482	-0.023338	-0.0268792	0.0383229	0.00364602	-0.0282942	0.0032278	0
26.2	-0.0330148	0.0300142	0.0136838	0.0193933	-0.00965048	0.0224459	0.0156936	-0.0172352	-0.0526292	-0.00950061	0
26.4	0.02421	0.0308965	0.00898344	0.0198308	0.00266605	0.00232794	-0.0469471	0.0130496	-0.0341241	-0.0180556	0
26.6	0.0288529	0.043119	-0.0158843	-0.0034507	0.00194608	-0.0460461	0.00278123	0.109082	0.0113634	0.00518801	0
26.8	0.043588	0.0354695	-0.015783	0.0761964	-0.00827688	0.0180229	0.0546926	0.0344792	0.0171115	0.000159157	0
27	0.0110826	-0.00177628	0.000669347	0.0364677	0.00322615	0.0328034	0.0348686	0.0129826	-0.025777	0.0123021	0
27.2	0.0251353	0.0156974	0.0693386	-0.00350861	0.0137084	0.0421924	0.0374942	0.0130885	0.00623252	-0.00599558	0
27.4	0.0335447	0.0374708	0.0765113	0.0369998	0.00444325	0.0307888	0.0584445	-0.00396652	0.0213081	-0.0436621	0
27.6	-0.00849278	0.00991371	0.0104141	0.0209192	0.00958357	0.000395656	0.0430766	-0.000974353	-0.0223914	-0.0224321	0
27.8	0.0215141	0.00898829	0.0243752	-0.0469917	0.0317704	0.0572793	0.0130843	-0.018366	0.0115775	0.0248945	0
28	0.0322793	0.0041482	-0.00485613	-0.0146841	0.00112675	0.0406821	-0.0473448	-0.0138313	-0.0270529	0.00833768	0
28.2	-0.0167701	-0.00246983	-0.0353836	-0.046588	-0.000219076	-0.0341542	-0.023519	-0.0023203	-0.0367816	0.0331069	0
28.4	-0.0586021	0.022997	-0.0401105	-0.0712176	-0.0121121	-0.0268246	0.0146319	0.0281736	0.0293354	0.0135876	0
28.6	-0.00670274	-0.00154268	-0.0711812	-0.0311529	-0.00143818	-0.00607694	-0.0181595	0.00558028	0.0564844	-0.025649	0
28.8	0.0350062	-0.0426445	-0.0612693	0.0058562	0.00932571	-0.0386456	-0.0481434	0.0226395	-0.0305834	0.0014995	0
29	-0.0187724	-0.0174478	0.0253117	0.0142617	-0.0287821	-0.0406291	-0.0169469	0.0789186	-0.0772834	0.0223065	0
29.2	-0.0260484	-0.0139524	0.0272434	0.0328086	-0.0221222	0.00841998	-0.0135829	-0.0460652	0.0412398	-0.0237353	0
29.4	-0.0197261	-0.0162207	-0.00492264	-0.00236433	0.0266939	0.00669229	-0.0107804	-0.0478325	0.0248329	0.0534752	0
29.6	-0.0357783	0.00370239	0.0208454	0.0156353	-0.0121367	0.0261281	-0.00237749	-0.0419578	-0.0169772	-0.0393821	0
29.8	-0.0108412	-0.0226126	0.0115574	0.0171752	-0.0369652	0.00424532	-0.00587264	0.0396138	0.0057071	-0.00159614	0
30	0.0215264	-0.0243124	-0.0151696	0.0125711	0.00766571	-0.0235012	0.0137947	0.0719803	0.0144837	0.0519831	0
30.2	0.00893177	0.000622481	0.00284059	0.0191911	0.0267912	0.00532754	0.0162646	-0.0306925	-0.0222595	-0.0281718	0
30.4	-0.00848623	-0.0410785	-0.0029045	-0.0202369	-0.00875469	0.0213638	-0.0356583	-0.0768883	-0.0265288	-0.00127532	0
30.6	-0.00626969	-0.0399603	-0.0564679	-0.0413847	-0.00482679	-0.00655813	-0.011494	-0.0286183	0.00856166	0.0235639	0
30.8	0.00753779	-0.0226942	-0.0236063	-0.0248848	-0.00628391	0.0102411	-0.00558332	0.0203629	0.0269503	0.0267202	0
31	0.00670299	-0.00516634	-0.0252505	-0.00217696	0.00789856	0.0215843	-0.0103868	0.0473027	0.0033289	0.00803999	0
31.2	0.0155234	0.00779142	0.0223742	-0.0707315	0.0337613	-0.00866379	0.0107958	-0.0140361	-0.024179	-0.00419114	0
31.4	0.0297388	0.00879647	0.0907834	-0.0646701	0.0148378	-0.0341995	-0.000728142	-0.0529419	-0.00968752	0.0215136	0
31.6	0.0174094	0.00912869	0.0584214	0.0625324	-0.0251834	-0.0151282	-0.0490696	0.0110818	0.00629863	0.0261299	0
31.8	-0.00777588	0.0132811	0.0219741	0.0512131	-0.00914769	0.0119209	-0.00787168	0.0239188	-0.0106704	-0.0338818	0
32	-0.0151547	-0.00807363	0.049211	0.0314797	-0.00290568	0.00585372	0.0783569	-0.0191129	0.042036	-0.00813394	0
32.2	-0.014843	0.0226539	0.00665236	0.00521415	0.0147412	0.0124931	-0.0345867	-0.0575756	0.0210544	0.0191087	0
32.4	0.019539	0.0318237	-0.0215648	0.0132423	-0.0050258	-0.013212	-0.0473514	0.0182219	-0.00932652	0.0227759	0
32.6	0.0203483	0.0257186	0.0119046	0.0368293	-0.00934087	-0.0133747	0.0184468	0.0201857	0.00895615	-0.0218204	0
32.8	-0.0377992	0.00262387	-0.0116243	0.0516787	-0.00735952	-0.024884	0.0159941	-0.0190975	0.00466099	-0.0509664	0
33	-0.046974	-0.0287586	-0.0866838	0.0571654	-0.0326649	-0.0581077	0.010638	0.0233017	-0.0421342	-0.00219848	0
33.2	0.0183604	0.0241761	-0.0490232	0.0113715	0.0105466	0.0373278	0.0151045	-0.0610223	-0.0352201	0.0156516	0
33.4	-0.0164014	0.0125706	-0.0686257	-0.0632078	0.0218372	0.00405398	0.0336755	-0.0151092	-0.0150847	-0.00840043	0
33.6	-0.0254353	-0.0314506	-0.0271069	-0.0319807	-0.00635059	-0.00949577	0.023122	-0.00451211	-0.0182391	0.00478612	0
33.8	-0.00653624	-0.022967	0.052259	-0.0144701	-0.0181922	0.0180097	0.00286558	0.0285199	-0.00532176	-0.0158075	0
34	-0.00704171	-0.00131959	0.00545101	-0.0134525	-0.0143821	0.0366637	0.00234142	0.045984	0.0215712	-0.0446425	0
34.2	-0.012477	0.015457	-0.0566276	0.0198218	0.00908899	0.0296618	0.0101516	-0.000147669	0.024505	-0.0343306	0
34.4	-0.0017833	0.051826	0.0287611	-0.0207626	0.0452677	0.0117041	-0.000285462	0.0196617	0.00697116	-0.0283384	0
34.6	0.0176826	0.0207487	0.00350265	-0.101536	0.0108652	0.0324763	-0.025326	0.0526953	-0.00792709	-0.00872363	0
34.8	0.0276318	0.0158139	0.0277765	0.0203592	0.0207048	0.00318972	-0.0234617	-0.0368934	-0.021857	-0.0315371	0
35	0.00861377	0.0164209	0.0415296	0.0529649	-0.0172402	-0.0117644	0.00848203	0.000548588	-0.00814373	-0.0014038	0
35.2	0.00197084	0.00720097	0.0286297	0.0123864	-0.021552	-0.016242	-0.00515712	0.0403735	0.0276878	0.0124468	0
35.4	0.0141931	0.00431166	0.0108331	-0.0363657	0.00535683	-0.0273611	-0.0642688	-0.0194656	0.00389535	0.0264985	0
35.6	0.0259143	0.00999528	-0.00633564	-0.0829255	0.000382927	-0.0197359	-0.0581281	-0.0278275	-0.0475702	0.07754	0
35.8	0.0304889	-0.00370236	0.00673035	-0.0126106	0.0201533	0.000830977	0.0236365	0.0365558	0.0107705	0.0475913	0
36	-0.0199378	-0.050073	0.0203616	0.015766	-0.0351657	-0.00238169	0.0150286	0.0543118	0.0548612	0.0215078	0
36.2	-0.00518447	0.000287557	-0.0105717	0.00992392	-0.028496	-0.0694529	0.0252357	0.0140114	0.0260577	0.0184158	0
36.4	0.00485919	0.0105675	-0.011027	-0.0190262	-0.000172193	-0.00245926	0.0131057	-0.000957653	-0.0312776	-0.00339487	0
36.6	-0.0103251	0.0029304	0.0406975	-0.0370866	0.00624841	0.0348577	-0.0222729	0.0142882	0.0175231	-0.023966	0
36.8	-0.00445548	0.014152	0.054467	-0.0269186	0.00318472	-0.0294582	-0.0199454	-0.00797436	0.0585302	-0.0195445	0
37	-0.00662192	-0.0138645	0.00773051	-0.00783443	-0.0011707	-0.00833817	0.00367104	-0.0424676	-0.0283147	-0.0160556	0
37.2	-0.0425519	-0.00824239	-0.00534194	0.0109389	0.00301932	0.00791933	0.00174618	-0.00624657	-0.00620398	-0.0272339	0
37.4	-0.0114074	0.00121026	-0.0402351	0.00608961	-0.00457632	0.00922654	0.0197379	-0.0260058	-0.0148258	-0.0348434	0
37.6	-0.0170564	0.0194052	-0.0149947	0.0397916	0.0110991	0.0119932	0.0265402	0.0204589	-0.0198496	0.0171054	0
37.8	0.0178558	0.0178608	-0.0266217	0.0466982	0.000614622	0.00154644	0.0449458	0.00573295	-0.0221632	0.0261233	0
38	0.0500442	-0.0138114	-0.0694558	0.0327359	-0.0048369	0.00331189	0.014123	-0.00988514	0.02632	0.00753233	0
38.2	0.0106474	-0.0283879	-0.0518287	0.0295448	0.0190991	0.0158493	-0.0407277	0.0064503	0.0813453	0.0156661	0
38.4	0.00895412	0.00795212	-0.0033196	0.0195263	0.00798169	-0.00450811	0.00106037	-0.0528396	0.0121698	-0.010241	0
38.6	0.0388906	0.0444687	0.0332593	0.0613648	-0.000356579	-0.0131597	0.00917717	0.0626298	-0.0312959	-0.0328643	0
38.8	0.0334843	0.0337251	0.013525	0.0258601	-0.00186192	-0.00854764	-0.0204932	0.0820619	0.0416526	-0.00172787	0
39	0.0262759	0.00201482	0.00351942	0.0109957	0.0220371	-0.00403589	-0.0220109	0.00768459	-0.00357032	0.0450817	0
39.2	0.014975	0.00452391	0.0202004	0.0680913	0.0279749	0.0169002	-0.00984133	-0.0286242	-0.0284205	0.001497	0
39.4	0.00109005	-0.00460013	0.0353021	0.0419457	-0.00968457	0.025384	0.00969397	-0.00590184	-0.0295413	-0.0186	0
39.6	-0.0153286	-0.0355689	0.0377108	-0.0639389	-0.0224003	0.0133565	0.0412296	0.00388283	-0.0857095	0.034698	0
39.8	-0.0369066	-0.00143717	0.0280161	-0.0206847	0.0231038	0.0232345	0.0356292	-0.0139897	0.00709439	-0.025915	0
40	0.0265795	-0.0137222	0.00481301	-0.00158919	0.0028323	-0.0185509	0.0131393	0.00252746	0.015375	0.00278847	0
40.2	-0.0108747	-0.0097877	-0.0325973	-0.0634596	-0.00119138	0.00900105	0.0317574	-0.0730024	-0.0159562	-0.0121731	0
40.4	-0.0281483	0.0136991	0.00328388	-0.0120213	0.00941109	0.00704362	0.00295186	-0.0881401	-0.000260615	0.0113788	0
40.6	0.0147376	0.0092703	0.0504529	0.0148808	0.0219262	-0.0238613	-0.00952599	-0.00900443	0.0170739	0.0141039	0
40.8	0.00282837	-0.0129091	0.0296641	-0.0144054	0.0153308	-0.00117453	0.00308803	0.00431678	0.0223784	-0.0332526	0
41	-0.0427847	0.0012017	-0.00871521	0.0514645	-0.0173692	0.0202568	-0.0354339	-0.0412447	0.0465079	-0.0130536	0
41.2	-0.00914102	0.0315876	-0.0194624	0.00358839	-0.00666982	-0.0205335	-0.0112899	0.00499596	0.0227381	0.000354295	0
41.4	-0.0061456	-0.0145381	0.018664	-0.0104503	-0.000513115	-0.00287219	-0.0219491	-0.0535595	0.00182284	0.00179071	0
41.6	0.0147646	-0.0408746	-0.00809718	-0.00144042	-0.00486392	0.00811538	0.0128658	-0.019722	0.0135408	0.0141427	0
41.8	-0.00912965	-0.0141567	-0.00444326	-0.0158313	-0.0283056	0.0141521	0.0166892	0.022851	-0.012355	0.000742617	0
42	-0.0234377	0.0024143	0.0250397	-0.0197957	-0.0189544	0.0262255	-0.0212782	0.0473658	-0.026382	0.00544676	0
42.2	0.00949309	-0.00761188	0.00240583	0.0334301	0.0127907	0.0262746	-0.0136687	0.0724862	-0.0113903	0.0317725	0
42.4	-0.013694	-0.00736899	0.00443041	0.0733173	-0.0142652	0.0190426	0.00794878	0.00425891	-0.0653896	-0.00298085	0
42.6	0.00581278	-0.0242485	0.0334844	-0.00619779	-0.00801131	0.00305859	-0.0134284	0.00435371	-0.0710829	-0.00794893	0
42.8	0.000551764	-0.0298035	-0.0224704	0.0126152	0.0196261	0.0236656	0.00938202	0.00175175	-0.0133	-0.000434946	0
43	0.0336841	-0.0191644	-0.0454508	-0.00970711	-0.00194212	-0.028806	0.0270187	0.0281374	0.0484361	-0.0171049	0
43.2	0.00278033	-0.0132365	-0.0463408	-0.00709536	-0.0262818	-0.0223579	0.00154427	0.0264599	0.0309	0.00243614	0
43.4	-0.0513661	-0.0162933	-0.0383982	0.00665685	0.00421596	0.0220099	-0.00497115	-0.0188111	-0.0240893	0.0146072	0
43.6	-0.0105795	-0.00411303	-0.0105761	-0.0397196	0.028176	-0.0287487	0.0107357	-0.0268958	0.00514882	-0.0202813	0
43.8	-0.0246951	0.00868281	-0.0463798	0.0154542	-0.0106939	-0.018432	-0.0223335	-0.0214358	0.0763596	0.00864421	0
44	-0.0466399	-0.0421017	-0.0291539	-0.0246485	-1.51345e-05	-0.00369268	0.013846	-0.0486547	0.0175758	-0.019466	0
44.2	0.000280925	0.0235309	-0.00471746	0.0298036	0.0260561	-0.0207384	0.0322832	0.0594917	0.00623996	-0.0227253	0
44.4	0.0127586	0.0272535	0.031884	-0.0176064	-0.000263472	-0.0207272	0.0197462	0.0551806	0.0254299	8.48143e-05	0
44.6	-0.018105	-0.00737122	0.0156954	-0.0584959	-0.0116778	0.00230011	-0.00109532	-0.00619923	0.042547	0.0111825	0
44.8	5.93676e-05	0.0210647	-0.00855822	-0.0154406	0.0064032	0.018553	0.00591176	0.00584565	0.0271813	-0.000284184	0
45	0.0402727	0.0150538	0.0342861	-0.0719073	-0.0149191	0.0158953	0.0202852	-0.0120421	-0.0382263	-0.0140457	0
45.2	0.0117308	0.0117143	-0.0183448	-0.0321981	-0.0102958	0.00272181	-0.0580849	0.0247484	-0.0216116	0.00232007	0
45.4	0.0291766	0.0227628	0.03858	-0.0192939	-0.0154867	0.0432831	-0.0491861	-0.0264216	-0.0154361	-0.0147004	0
45.6	-0.0088595	-0.0247057	0.0066965	0.0442061	-0.00431505	-0.0169562	-0.0275032	-0.00486911	0.00513921	0.012192	0
45.8	-0.0185943	-0.00787779	-0.0755194	0.0145769	-0.00504705	-0.0436951	-0.0285759	0.0325662	0.015902	0.0239233	0
46	-0.0119345	0.0339633	-0.0354544	-0.00111183	-0.0120859	-0.0121451	-0.00514764	0.0258178	-0.0101493	-0.00448208	0
46.2	-0.0418524	-0.00687653	0.019307	0.0608045	-0.00613368	-0.016455	0.0181594	-0.00610444	-0.0393555	-0.0155705	0
46.4	-0.0127841	-0.0240471	-0.0402906	-0.0481364	-0.00867698	0.00227793	-0.0030668	-0.073217	-0.0435129	-0.00628565	0
46.6	-0.0144566	-0.0225482	0.0415372	-0.0370506	0.0138354	-0.0266816	0.0166959	-0.0393711	-0.0335752	0.026875	0
46.8	0.0316709	-0.014071	-0.0188774	0.0318849	-0.0143138	-0.0237259	0.0122415	-0.0102271	-0.0180884	0.0225407	0
47	0.0148069	0.00688878	-0.0212235	-0.00676202	0.00996652	0.0188667	-0.0024536	0.0265323	0.00796079	-0.0200286	0
47.2	-0.0269018	-0.0114067	0.00673824	-0.0113222	0.0174157	-0.0122001	-0.00914951	-0.0192174	0.0318451	0.0100208	0
47.4	0.00253999	-0.00860177	0.0264789	-0.000514942	-0.0348962	-0.0460636	-0.0121693	-0.0285128	0.0359751	0.0544249	0
47.6	0.0270351	0.0517113	0.0769303	-0.0940199	-0.0328642	0.0141577	-0.0136226	0.0807036	0.024553	-0.00818125	0
47.8	-0.0146989	0.0148935	-0.0197506	-0.0549706	0.00167701	0.00708185	-0.0157668	0.00327842	0.0126469	-0.0440268	0
48	0.0299991	0.000834471	0.0224873	0.0350017	-0.0252169	0.0166824	-0.000919756	0.0037172	-0.00181909	-0.013089	0
48.2	0.0103384	-0.0143555	0.0420941	0.018968	-0.00251076	0.0118112	0.00209258	-0.0125128	-0.0127783	0.0153746	0
48.4	0.0111342	0.0321498	-0.00934876	0.0432421	-0.015652	0.0339367	-0.00225446	-0.0400069	-0.0135179	-0.00518519	0
48.6	0.0346088	0.0360349	-0.0195159	0.0656545	-0.0211606	0.00948093	0.000248085	-0.00863615	-0.00454502	-0.0257027	0
48.8	0.00476867	-0.0443532	0.00339752	-0.00186563	0.010921	-0.0311674	0.0118678	0.0353176	0.0206009	-0.0313249	0
49	-0.0013747	-0.037129	-0.0223636	-0.0285536	-0.00252314	0.0260695	0.0206256	0.0403247	0.041127	-0.0286184	0
49.2	0.0338511	0.0107376	-0.00949682	-0.00707065	0.0558805	-0.0133714	0.0061212	0.0589133	0.00378871	0.0463943	0
49.4	-0.0165669	0.00700056	0.043049	0.0484347	0.00281807	-0.000210016	0.00497321	0.00299231	-0.0156153	-0.0105218	0
49.6	-0.0141938	-0.00746773	0.0551818	0.0621935	-0.0111721	-0.00231087	0.025905	0.0191745	-0.0771063	-0.00625042	0
49.8	-0.00629441	0.00455926	0.00623545	0.0174728	0.0362062	-0.010793	-0.00687169	0.0199611	-0.0266007	0.0485841	0
50	0.00908862	0.0249152	-0.0192061	0.00864092	0.0460353	-0.0252188	-0.0540878	-0.0121681	0.0533226	0.0502769	0
50.2	0.0270446	0.0129281	0.0109966	0.0259065	0.0260009	-0.0422955	-0.0245845	-0.0105629	-0.00119553	0.0201928	0
50.4	-0.0589318	-0.0164798	0.00428113	-0.0399255	0.033968	0.0134418	0.0264075	-0.0547522	-0.0152887	0.00562552	0
50.6	0.0144274	0.0232066	-0.029447	-0.0287261	0.0264555	0.0271972	0.0366844	-0.0482214	-0.0144018	0.042656	0
50.8	0.0123679	0.00217356	0.00808129	0.0069195	-0.0124374	0.0245755	0.00197941	-0.0779832	0.00773031	-0.0193369	0
51	-0.0377557	-0.0390603	-0.0275349	0.0137555	-0.00705738	0.0222982	-0.00251121	-0.0322725	-0.041488	-0.05107	0
51.2	-0.0322851	-0.0064619	-0.043826	-0.04857	0.00840195	-0.00151465	-0.00163465	0.0149701	-0.0482726	-0.01839	0
51.4	-0.000207867	0.0251346	0.0266493	-0.0726542	-0.0011081	-0.0197559	-0.00805281	0.0220161	0.0204281	-0.00254746	0
51.6	-0.00250028	-0.017973	0.0269925	0.0215166	-0.0128323	0.00437149	0.0144583	0.0559753	0.0297083	-0.0140807	0
51.8	-0.0139514	-0.00874576	-0.0237738	0.0320327	-0.0402508	0.0229506	0.0189557	-0.00152947	0.0261715	-0.0312665	0
52	0.0344363	0.0111876	-0.0252237	-0.0142225	0.0142535	0.0229148	0.0245003	-0.0255079	-0.00806714	-0.0121119	0
52.2	0.0303337	-0.012898	-0.0274203	0.0292752	0.0184332	0.00443973	-0.0106571	0.0296306	-0.00465902	-0.00464244	0
52.4	-0.00862699	-0.0309352	-0.0163606	0.0438746	0.0142752	0.00749072	-0.0241634	0.0171392	0.0310817	0.00933016	0
52.6	0.00182925	0.00246036	0.0105009	-0.00257658	0.00149965	0.0266541	0.0133433	-0.0387451	0.037144	0.00275342	0
52.8	0.023757	0.00942995	0.0086878	0.00556941	-0.0295307	0.0346039	0.0317185	-0.000520154	0.0112453	-0.0158545	0
53	-0.00130028	-0.0344293	-0.0195858	0.0348274	-0.00442936	0.0254464	0.0112182	0.0464047	-0.0154688	-0.00383701	0
53.2	0.0217828	0.0312845	-0.0145312	-0.0107337	-0.0105196	-0.0204164	0.0299573	-0.046307	-0.0587885	-0.0477304	0
53.4	0.0165995	-0.00923544	0.0482699	0.0585119	-0.0127971	-0.032354	0.0202981	-0.0189555	-0.0118568	0.0565496	0
53.6	0.0057191	0.000449133	0.0360273	6.55381e-05	0.0173882	-0.0141417	0.00467712	-0.00398228	0.0484554	0.0401202	0
53.8	0.00144033	0.0336412	-0.000998156	-0.00706464	0.0444214	-0.0201963	-0.00887102	0.00456164	-0.00408393	-0.0353616	0
54	-0.00882013	0.0220136	0.0247801	0.0473847	0.0161454	-0.00828921	-0.0171162	0.00623729	-0.0459636	-0.0243484	0
54.2	-0.0304415	0.0140813	0.0403588	-0.0412001	-0.0263574	0.0288792	-0.0209922	-0.0536583	0.0281149	-0.000311873	0
54.4	-0.0447673	-0.01508	-0.00876876	-0.0627601	-0.00111256	-0.00783213	-0.030717	-0.0324333	0.0469613	0.0134944	0
54.6	0.00685826	-0.0205426	0.0113183	-0.0379013	0.00269193	-0.00877191	0.0158215	0.0555195	0.0552326	0.00164236	0
54.8	-0.00648517	0.0230234	0.0546191	0.000919557	0.0080867	-0.0484845	-0.00114438	0.00244382	0.0259227	-0.0107191	0
55	0.0136952	0.0420221	0.0628252	-0.00738433	-0.00528429	0.00559003	0.0146791	-0.0150451	0.0374794	0.0253524	0
55.2	0.0208085	0.00251145	0.0213501	0.00572979	-0.024426	0.0660493	0.0252962	0.0436835	-0.00961203	0.0471599	0
55.4	-0.0207422	0.00422979	-0.0408618	-0.00721659	-0.00668788	0.0635835	0.000676571	0.0471244	-0.0808506	0.0296511	0
55.6	-0.00724113	0.0558793	-0.0427337	-0.0954117	0.0137115	0.0598993	0.0251398	0.0196709	-0.0174604	0.0126543	0
55.8	-0.00255538	-0.0142832	0.0261548	-0.00910149	-0.0199548	-0.0672921	-0.000871344	0.0282084	-0.00991081	-0.0445066	0
56	0.0219147	-0.0165587	-0.0547059	0.0298501	-0.00016983	-0.0607827	-0.0533643	-0.0316644	-0.0112883	-0.0216838	0
56.2	0.0222107	-0.0204295	-0.0708565	0.016684	0.003424	-0.0651616	0.00499236	0.00059009	-0.0363356	0.0378667	0
56.4	-0.0124554	-0.0181107	-0.0577306	0.0207116	-0.0218772	-0.0478926	0.027731	0.0169353	-0.0270156	0.0178607	0
56.6	-0.0462523	-0.0450316	-0.0840952	0.0137838	-0.0392064	-0.0239673	-0.00136134	-0.0241294	0.00390622	-0.0552227	0
56.8	-0.0440906	-0.074439	-0.062539	-0.00110065	-0.0161078	-0.0148341	-0.000718584	-0.0286642	-0.0116844	-0.0545245	0
57	-0.0113016	-0.000715344	0.0252865	0.0379795	0.0332897	0.0443321	-0.0421714	-0.0203012	-0.0224516	0.00573202	0
57.2	0.000940848	-0.028363	0.0881377	0.0494225	0.00466887	-0.0424351	-0.0485412	0.00524107	0.0317915	-0.0234782	0
57.4	-0.00965119	-0.0444881	0.0527789	0.0376916	-0.0146041	-0.00889801	-0.0148282	-0.005685	-0.000159293	0.00091658	0
57.6	-0.0398888	-0.0123029	0.077691	0.0103105	0.0125656	-0.0206171	-0.00978744	0.0276239	-0.04186	0.0103242	0
57.8	-0.0578281	-0.0178361	0.0209122	0.000989976	0.0141435	-0.0470121	-0.0169784	0.0367927	0.00392715	0.00580094	0
58	-0.0335946	-0.0309883	-0.037845	-0.0396473	-0.00354079	0.00079077	0.00785267	0.0348084	0.0480893	-0.00205635	0
58.2	-0.00215599	0.00978249	0.0338082	-0.0818973	-0.00517502	0.0255285	0.0234086	0.059906	0.00662363	-0.0338833	0
58.4	-0.00847163	0.0173858	-0.0583146	0.0209778	-0.0347135	0.01559	-0.01006	-0.022276	-0.0153679	-0.0116862	0
58.6	0.0142194	0.0267315	0.00734617	0.00194132	0.0109998	-0.000381271	0.00660342	-0.00861101	0.000476966	0.0275344	0
58.8	-0.00373126	0.000689499	0.00946922	-0.0662658	0.00228366	-0.0249564	0.00279729	0.0298283	0.00233481	0.0239898	0
59	-0.0200076	-0.0042211	-0.00307804	-0.0512075	-0.0142484	-0.0359851	0.0308424	-0.0293596	0.0452452	0.0364422	0
59.2	-0.0150601	0.0118528	-0.0435945	-0.015057	-0.0308369	-0.0222925	0.0635932	-0.065343	0.0362683	0.0430059	0
59.4	-0.0168278	-0.00178419	-0.073853	-0.0198279	-0.0412906	-0.0097492	0.0153303	-0.0390323	-0.0433173	0.00400618	0
59.6	-0.0134846	-0.0370047	0.0286333	-0.0238173	0.000288896	-0.0265338	-0.0457099	-0.0655834	-0.0264632	-0.0356423	0
59.8	0.00307858	-0.0602903	0.014614	-0.0603914	-0.0103476	-0.0498975	-0.00869588	-0.0287442	0.0302478	-0.0467252	0
60	0.0420252	-0.00941561	-0.00445709	-0.0675952	0.0117062	0.000342097	0.00599795	0.0148223	0.0141887	0.0483939	1
60.2	0.216642	0.190831	0.078378	0.0911915	0.0458043	0.141845	0.0524706	0.0900569	0.0165469	0.0631287	1
60.4	0.278204	0.325273	0.153212	0.0807277	0.0532468	0.219017	0.152055	0.102887	0.0694325	0.107369	1
60.6	0.227872	0.268828	0.138844	-0.00432615	0.0666742	0.197093	0.146839	0.0540787	0.033898	0.134704	1
60.8	0.226627	0.185679	0.101759	0.0815443	0.0705658	0.162185	0.076506	0.05334	-0.0205797	0.0550382	1
61	0.17736	0.207138	0.106838	0.0627567	0.0272969	0.125945	0.138778	0.0933354	0.0908819	0.0738521	1
61.2	0.22419	0.237456	0.127069	0.0739101	0.0610013	0.135452	0.0617372	0.116115	0.0182453	0.0738532	1
61.4	0.185512	0.228606	0.10113	0.0414648	-0.0110165	0.157005	0.100958	0.0779616	-0.00152914	0.0396285	1
61.6	0.209471	0.2133	0.105532	0.017372	0.0295071	0.135779	0.0836637	0.018992	0.0497378	0.0250047	1
61.8	0.218788	0.193377	0.0598343	-0.00116194	0.0748481	0.118802	0.0509496	0.0474521	0.0533942	0.0290875	1
62	0.170778	0.179507	0.0366891	-0.00806277	0.00995078	0.101646	0.0740086	0.0739986	0.0303175	0.0307337	1
62.2	0.204533	0.195595	0.127011	0.0172315	0.0116887	0.072431	0.0489341	0.00198629	0.0437333	0.0211837	1
62.4	0.212423	0.204109	0.0652457	-0.0160206	0.0387413	0.125263	0.0609482	0.0154443	0.0390867	-0.000166269	1
62.6	0.179226	0.188736	0.0366898	-0.0486202	-0.0158584	0.118177	0.0586869	0.0181549	0.0280033	0.0378568	1
62.8	0.159961	0.174731	0.108273	-0.0630838	-0.00786087	0.12775	0.0234514	0.040573	0.0183939	0.0768871	1
63	0.174072	0.170799	0.129613	-0.013362	0.0155961	0.0977506	0.0407844	0.0664681	0.0225981	0.0254393	0
63.2	0.182594	0.171248	0.0858206	0.0361716	0.00239401	0.0867603	0.0488577	0.0897222	0.0192912	-0.0113312	0
63.4	0.15852	0.16623	0.084192	-0.00239182	0.00925844	0.110214	0.0222564	0.0853871	0.017986	0.0153672	0
63.6	0.11749	0.150808	0.104805	-0.0547637	0.0413857	0.0566067	0.0492766	0.0339119	0.0435217	0.00104403	0
63.8	0.0836485	0.137451	0.0624087	-0.0129431	0.0344964	0.071816	0.0218085	0.0434865	0.0363942	0.024469	0
64	0.112996	0.124004	0.0429139	0.0115085	0.0139002	0.0735463	0.0370469	0.0289121	0.063768	0.0090762	0
64.2	0.0757845	0.0956724	0.0505502	-0.0543608	-0.0117436	0.065053	0.0448403	0.049359	0.0585742	-0.0109332	0
64.4	0.0934846	0.10036	0.0574306	-0.0323794	-0.00789946	0.0514817	0.00591101	0.053884	0.0582982	0.003897	0
64.6	0.11182	0.102423	0.0330258	0.0035394	-0.000101842	0.0165559	-0.0239127	0.0244346	0.0187448	0.0136521	0
64.8	0.043811	0.0538943	0.0165093	-0.0651228	-0.0300528	0.00778116	0.00194255	0.0179003	-0.080909	0.00229954	0
65	0.0890485	0.0458816	0.0586379	-0.0260216	-0.0387003	0.0582179	0.0388833	0.0197448	-0.0507075	0.0115798	0
65.2	0.049979	0.088701	0.0193989	-0.0191249	0.00836299	0.0352578	0.0237188	0.0503027	0.0321448	-0.00259849	0
65.4	0.100027	0.0947245	0.0285895	-0.0374368	0.0315857	0.0375803	-0.0137116	0.0322767	-0.0317867	0.00911631	0
65.6	0.0685292	0.0664399	0.00917208	-0.0496189	-0.00445626	0.036782	-0.0177388	0.0204237	-0.0121802	0.00679202	0
65.8	0.0131486	0.0078219	-0.0244949	-0.0323616	-0.0347162	0.00031056	0.0141912	-0.0119371	0.0222219	0.0289708	0
66	0.0341106	-0.0130175	0.00459941	-0.0184197	-0.0240619	-0.0158463	0.0112084	-0.0222794	-0.0375281	0.0386717	0
66.2	0.0251974	0.0325132	0.0214722	-0.0207787	-0.0128664	0.0152724	-0.0326509	0.0308803	-0.0361329	-0.0282044	0
66.4	0.0291821	0.00739918	-0.0270893	0.012838	-0.0124857	0.0231377	-0.00410354	-0.0274239	-0.0114418	-0.0116831	0
66.6	-0.0120881	0.0370735	0.00793794	-0.0587876	-0.0164375	-0.00993668	0.0177911	0.00750907	-0.0030867	0.0197447	0
66.8	-0.0278994	0.0105012	-0.00822	-0.0247192	-0.00770715	0.0351228	-0.0189514	0.0256809	-0.00444915	-0.0235039	0
67	-0.0159369	-0.0123229	-0.00596029	0.0331493	-0.00896631	0.0266314	-0.0208771	-0.0272752	0.0575699	-0.0165883	0
67.2	0.000503325	-0.00337907	0.0156164	0.0153307	-0.00412215	-0.0153005	-0.00227594	-0.0537686	0.0344089	0.000677568	0
67.4	0.0109573	-0.0178884	-0.0144596	0.000822894	0.00771614	-0.0122392	-0.0144272	-0.0395825	-0.0542436	-0.0388078	0
67.6	-0.00743989	-0.0218614	-0.0259626	-0.00344676	-0.0173608	-0.0549061	-0.00154278	-0.0380041	0.0320589	-0.0174183	0
67.8	-0.0373973	-0.000238228	-0.0331374	-0.0705227	-0.0354414	-0.0421437	0.0016517	0.0285725	0.0223173	-0.00257144	0
68	-0.0387005	0.0178192	-0.0581471	-0.0758329	-0.0357381	-0.0172551	-0.0201803	-0.00307631	-0.00176738	0.000404715	0
68.2	-0.00128796	-0.0104221	-0.0203291	-0.0205987	0.00954748	-0.0277597	-0.0263364	0.0371129	-0.0786315	-0.0143748	0
68.4	-0.0112497	-0.0321148	0.0165754	0.00542135	0.0292421	-0.027954	-0.0213	0.0547646	-0.0451994	0.00966753	0
68.6	-0.0431214	-0.0120486	-0.00140386	-0.039043	-0.00529361	0.00867708	-0.0234639	0.0125877	0.019244	0.0486775	0
68.8	-0.0309862	-0.00639308	0.00859158	-0.060607	-0.0276169	0.0202689	-0.0181696	0.0211916	-0.0324027	0.035667	0
69	-0.0366058	-0.0289564	0.0360252	-0.00478645	-0.00866042	-0.0201237	0.00645458	-0.0192859	0.026213	0.0148959	0
69.2	0.0099412	0.00568717	-0.0720858	-0.0766314	0.0373853	-0.00625487	0.0285301	-0.0177471	-0.00802783	-0.0077398	0
69.4	-0.00962453	-0.00834004	-0.0170563	0.0351302	0.00264627	0.0362297	0.00923071	0.0159759	0.0282196	0.0266811	0
69.6	-0.0172372	-0.0161322	0.0289057	0.115599	-0.0333284	-0.00742676	-0.00524341	-0.00088734	0.0254941	-0.0106935	0
69.8	-0.00641062	-0.000580957	0.00233888	0.0577084	-0.0168619	-0.0357684	-0.000676972	-0.0240714	-0.0198182	-0.0373311	0
70	-0.00691499	-0.0178399	0.0261177	0.0170378	0.00628341	0.0169068	0.0222455	-0.0234599	0.02629	-0.00118852	0
70.2	0.0158341	-0.0508039	0.0434144	0.0137216	0.00622257	0.0243039	0.0360967	-0.0314498	0.0781226	-0.0247376	0
70.4	0.00294338	-0.0417701	-0.0127856	0.00423779	0.00274825	0.000693556	-0.0289222	0.00497134	-0.0127501	-0.0053377	0
70.6	0.00688924	0.00581856	-0.037885	0.0255245	0.0415453	0.00665674	0.00942736	-0.0347412	-0.00732184	0.0177419	0
70.8	0.0390047	0.014303	0.0129654	0.0705638	0.0484808	0.0648732	0.0265814	-0.0262529	0.00259311	-0.0135987	0
71	0.0431191	-0.0112024	0.0513333	0.0489769	0.044638	0.0303825	-0.0254584	0.00831411	-0.0415508	-0.0196945	0
71.2	0.0268021	-0.00688982	0.0305753	-0.00882602	0.0482493	-0.0301407	-0.0382807	0.0121636	-0.0466398	0.00828482	0
71.4	0.0331935	0.0345543	0.00653859	-0.00728102	0.0210287	0.00982692	0.000912707	0.0306806	-0.00957348	0.00114685	0
71.6	0.0277627	0.0582065	0.0214842	0.00482556	-0.0185572	0.02432	-0.00462628	0.048821	-0.0140996	-0.0120564	0
71.8	-0.0124711	0.0492281	0.0342641	-0.0374035	-0.0159711	0.00541749	0.00140901	-0.013131	0.0240793	0.0194564	0
72	0.0234544	0.0170749	-0.0146615	0.019296	-0.0301809	0.0228713	0.0165437	0.0430272	-0.00354317	0.0396309	0
72.2	0.0219098	0.0097381	-0.0453825	0.0414996	-0.00439012	0.0118333	0.0198024	0.0299873	-0.00955714	0.0162404	0
72.4	0.00598026	0.0253899	-0.00884525	0.00428071	-0.00386851	-0.00616431	-0.00122203	-0.00656327	-0.0180888	0.00510921	0
72.6	0.00456389	0.0112805	0.00664342	-0.0281024	-0.030148	0.0132106	-0.00775462	0.0224069	-0.0296704	0.00488569	0
72.8	-0.0143104	-0.026506	-0.0224949	-0.0302788	-0.0114679	0.00792973	0.0129265	-0.00328651	0.0341178	-0.0121245	0
73	0.0108022	-0.00885376	0.0301243	0.0266097	-0.0258874	-0.0401598	-0.00247024	-0.0585572	0.0798811	0.0111473	0
73.2	-0.0348538	0.0335665	0.0605472	0.00745632	-0.00369053	0.0051181	-0.00613088	-0.0166555	0.043846	0.00871269	0
73.4	-0.00846566	0.0362913	0.039752	-0.0174955	0.0499111	7.60983e-06	-0.0231691	0.00547754	0.00439271	-0.0137687	0
73.6	0.00429566	-0.00444919	0.0208214	0.022821	0.0336425	-0.024853	0.00289628	0.0233243	-0.0258723	-0.018708	0
73.8	-0.00973648	-0.0227359	-0.0145132	0.0359152	0.0108139	-0.0297153	0.0118799	0.00459221	-0.0140908	-0.0278916	0
74	-0.000846565	-0.0157421	-0.0472201	-0.00479782	0.0180117	-0.0305689	-0.0323982	-0.0139941	0.0122271	-0.0232037	0
74.2	-0.0151659	-0.0236702	-0.0155393	-0.00638565	-0.0233085	-0.00375945	-0.0139506	0.0419433	-0.0231932	0.0208383	0
74.4	-0.00529126	0.00206381	-0.0263517	-0.0239509	-0.0148512	0.0234488	0.0418521	-0.0169239	-0.0242024	-0.000574622	0
74.6	0.00472285	-0.0260842	-0.0695287	-0.0176242	-0.0122181	-0.00125164	0.0175332	0.0122489	0.00561816	0.0191043	0
74.8	0.0157361	0.0118067	0.0207182	0.0268233	-0.0105322	0.00382103	0.0262725	0.0173149	0.00192052	0.0362079	0
75	0.0185939	0.00309701	0.0441547	0.00245191	-0.00936169	-0.00595105	0.0420476	-0.028057	-0.0130402	0.0232317	0
75.2	0.00439286	-0.0114569	-0.0182356	-0.0173599	-0.00509674	-0.0105562	0.0214776	-0.0229811	0.0086516	-0.0212128	0
75.4	-0.00975924	0.0582522	0.0187273	0.031594	0.0113824	0.0249434	0.00890702	0.00870493	0.0325237	-0.0627812	0
75.6	-0.00415014	0.0218935	0.0514999	-0.00675986	0.0116217	0.00497924	0.00380955	-0.0102515	0.0351959	-0.0318642	0
75.8	0.00581351	-0.0108516	0.0267997	-0.0274853	-0.0263618	0.00703632	-0.000135506	0.0236763	0.0970087	0.0133942	0
76	-0.00229856	0.0168942	0.0069165	-0.0768569	-0.0368315	-0.00403482	0.0117426	-0.0329443	-0.0149908	0.0391862	0
76.2	-0.009827	-0.0196484	-0.00450363	-0.0300609	0.0330056	-0.0133189	0.0386878	-0.0112365	-0.0641311	0.00642814	0
76.4	-0.00630349	-0.0298469	-0.0418792	0.0473663	0.060732	-0.00736953	-0.0217023	0.0226187	0.00211302	-0.0240682	0
76.6	-0.0177348	0.0180853	-0.0791933	0.0203186	0.0153337	0.0154026	-0.061801	0.00143107	0.0130355	-0.0143535	0
76.8	-0.0332805	-0.0109961	-0.0532813	-0.0306154	0.0039362	0.0410825	0.0188322	0.00400312	-0.0368975	0.0078672	0
77	-0.0025044	-0.0373156	0.0179687	0.00181992	-0.0134298	0.0344581	-0.0341093	-0.0583302	-0.0447664	0.0392996	0
77.2	-0.00641256	-0.0119699	0.0477981	0.0167171	-0.0322169	0.0424998	0.00110945	0.0217291	0.0194047	-0.0108856	0
77.4	0.0239225	-0.0119223	0.0251041	0.0430206	0.0204469	-0.00857518	0.0107086	0.0101116	0.0334795	0.0413447	0
77.6	0.00923028	-0.0168473	-0.0214537	-0.00128854	0.0357578	-0.0381831	-0.02866	0.00707571	-0.0170176	0.0120441	0
77.8	-0.00650875	-0.000951041	-0.00307278	-0.0356202	-0.00144894	0.00168849	-0.0286191	-0.0042868	-0.0236695	-0.046737	0
78	0.013403	0.0148066	0.0376425	-0.00339929	-0.0331533	0.0248038	0.000580707	-0.0487839	0.00881471	-0.0130197	0
78.2	-0.0302647	-0.000733888	-0.0105189	-0.0425614	-0.0607054	-0.0145223	-0.0136386	0.0173901	-0.00983489	-0.0472134	0
78.4	-0.0138805	-0.0573463	0.00675509	-0.0497938	-0.00777063	-0.0439974	-0.0253637	-0.0295585	0.011518	-0.0269359	0
78.6	0.017674	0.0128865	0.0104893	0.0432323	0.0164174	-0.0429494	0.013664	0.00539345	0.0198461	0.0110364	0
78.8	-0.0029817	0.0617122	0.0235388	0.023084	-0.000436771	-0.0071241	0.0403825	0.0331895	0.0174869	0.0163698	0
79	0.000432888	0.0140651	-0.0379658	0.0108039	-0.0016074	0.00717769	0.01067	-0.00836366	0.0195945	0.0321271	0
79.2	0.0165572	-0.00915898	-0.0984313	0.0468252	0.00988904	-0.00507887	-0.0244265	-0.0208625	0.0106447	0.0585403	0
79.4	-0.00255444	0.025945	-0.0267401	-0.0114963	0.00641661	-0.00183173	-0.00170629	0.022837	-0.0189647	0.0407519	0
79.6	0.0159906	0.00937676	0.0284166	-0.0457595	0.0105714	-0.00173131	0.0318867	0.0187276	-0.0406477	0.00206423	0
79.8	-0.0185754	0.0149666	0.0295422	-0.00854507	0.00834695	-0.00697335	-0.0198899	-0.00963283	-0.02187	-0.00963255	0
80	-0.00266309	0.011283	-0.0300078	-0.0533046	0.00109699	0.00547844	-0.0322244	-0.0188685	0.01926	-0.0336268	0
80.2	-0.031851	-0.0153011	0.0437567	-0.00636944	0.0106187	-0.00123284	-0.0137355	0.0265705	0.0132593	-0.00567277	0
80.4	-0.0545977	-0.0230586	0.0462561	0.0564898	-0.0099373	-0.0162668	0.00436856	0.0343758	-0.00366578	-0.0046551	0
80.6	0.00881862	0.00251731	-0.0444868	0.0112744	-0.0308029	-0.00581658	0.00524811	-0.006091	0.00221897	-0.040959	0
80.8	0.0470588	0.00918404	0.0213751	-0.0098341	-0.00732536	0.0115561	-0.0211616	0.0017878	-0.00411091	0.00652368	0
81	0.00949833	-0.0322401	-0.0324857	-0.0099739	-0.0420279	0.00192836	-0.0182512	-0.00889441	-0.00340617	0.0366709	0
81.2	-0.0307621	-0.0394032	-0.0437811	-0.0307305	0.0197737	-0.0353976	-0.00708077	-0.0400719	-0.0258657	0.00460299	0
81.4	0.0209209	-0.00238122	0.0184722	0.0200743	-0.0111672	-0.0077652	0.0179463	0.00480129	-0.0246501	-0.00294629	0
81.6	0.0561364	0.0458312	0.0430397	0.0155197	-0.02461	0.00864169	0.00196294	0.0376465	-0.0213897	0.0045762	0
81.8	0.0165683	0.0445088	0.0184606	0.0314084	0.027207	-0.00285607	-0.0126175	0.0170108	-0.00581866	-0.0119232	0
82	-0.0145109	-0.010022	-0.0282959	0.08224	0.0512102	0.00323283	0.0207378	0.0304374	0.0275931	-0.0143599	0
82.2	0.00335095	-0.0314654	-0.0555475	-0.0346443	0.0480153	-0.00551045	0.0234251	0.0409141	0.0139326	0.0248481	0
82.4	0.0268819	0.00112104	0.0932079	-0.0108697	-0.0548522	0.00769596	-0.00562418	-0.0730183	-0.00987797	0.0212499	0
82.6	0.0241225	0.00318823	0.0716802	-0.000199701	0.00945785	-0.00942066	-0.0589663	-0.0176215	0.00822621	-0.0224803	0
82.8	-0.00110514	-0.0195512	0.0276618	-0.000361332	0.0328	-0.0440235	0.0448546	0.00171808	-0.00260054	-0.0216382	0
83	-0.0211315	-0.0106746	0.0366463	-0.0115133	0.00959159	0.0141876	0.0607415	-0.065199	-0.0158185	-0.00801031	0
83.2	-0.00765251	-0.0102013	0.00233962	-0.0249586	0.0219857	0.0591488	-0.0189336	-0.0155243	0.00950417	0.0035945	0
83.4	0.00123391	-0.0366259	-0.0415214	0.0157176	0.00320385	0.00486928	0.045329	0.0936686	0.0177502	0.0278408	0
83.6	-0.0440719	-0.00398442	-0.0209994	0.0492227	-0.0172399	0.0473911	0.0334701	0.0104328	-0.00872176	0.00205352	0
83.8	-0.0182381	-0.0330179	-0.0476025	-0.0320652	-0.0151283	-0.0145679	-0.0111998	-0.0366561	0.0106817	-0.00746778	0
84	-0.000179794	-0.0312655	-0.0224726	-0.0512076	0.0226272	-0.0264703	-0.0452342	-0.0249961	-0.0074896	-0.0483324	0
84.2	0.00438392	0.0306782	-0.0336276	0.0205655	0.0158032	-0.0239389	-0.0360047	0.00383907	-0.0268265	-0.0150117	0
84.4	-0.00904578	0.0209894	-0.0273919	-0.00120833	-0.0327944	0.00412675	0.00360645	0.0183044	-0.0121032	0.024476	0
84.6	-0.0336776	0.00109223	-0.00672398	-0.0952463	-0.0455473	0.0369937	0.0161399	0.00888301	0.0328777	0.00283196	0
84.8	-0.0191472	0.0757821	-0.0590302	-0.059342	-0.020524	-0.015863	-0.0169736	-0.0172418	0.0670346	0.000148912	0
85	0.00874076	-0.00855738	0.0233522	-0.0102542	-0.0200957	-0.0166698	-0.0300612	-0.0493154	0.00338501	-0.0396737	0
85.2	0.0167697	0.0123333	-0.028205	-0.03868	-0.0346647	-0.0705083	-8.2858e-05	-0.0164288	0.00974794	0.018374	0
85.4	-0.00160497	0.011098	-0.0225784	-0.0441627	-0.0310294	-0.0280694	-0.00738166	0.0176983	-0.0131709	-0.0272347	0
85.6	-0.0217567	-0.0168784	0.00386238	0.00609544	-0.0148562	0.0161143	-0.026163	-0.0168358	-0.0528115	-0.00933906	0
85.8	-0.0240362	-0.016368	-0.0150879	0.0247092	0.004204	0.00609652	0.00673738	-0.0298131	-0.0393946	0.0468087	0
86	-0.00797346	-0.0271599	0.0107301	-0.00428907	0.0210675	0.0140529	0.0455033	0.0325928	-0.0133946	-0.0120688	0
86.2	0.00487809	-0.0325239	0.0375367	0.00991908	0.0125393	0.00374217	0.0163124	0.0551403	-0.0241033	0.0079063	0
86.4	-0.0155624	0.0105807	-0.0277316	0.0285357	-0.0212094	0.00369848	-0.00204267	0.047176	-0.0199963	0.0217493	0
86.6	0.011445	0.00121327	-0.00147981	0.00532908	-0.0202564	-0.0385178	0.0197448	-0.0144645	0.0151493	-0.00421421	0
86.8	0.0467988	-0.00254277	0.0193186	0.028495	0.0156221	-0.0265938	-0.0208633	-0.0238311	0.0164895	0.000715227	0
87	0.0101469	-0.0180264	0.0117573	0.0188138	0.0329251	0.00250303	-0.0436306	-0.0140336	-0.00911215	0.0479024	0
87.2	-0.011143	-0.012439	0.0150074	-0.0179653	0.0251577	-0.0119242	-0.0212746	0.0120261	0.00303076	0.0260399	0
87.4	0.0367442	0.0530099	0.0106577	0.00448268	0.0355138	-0.0021832	-0.0335486	0.057243	0.0297379	-0.0484953	0
87.6	-0.00725582	0.0188039	0.0313155	-0.0220006	0.0508194	0.0333684	-0.0048845	-0.0135237	-0.00714258	0.00226485	0
87.8	-0.00488923	-0.015058	0.0209629	0.0502355	0.0109518	-0.0109684	-0.00446927	0.0324815	-0.0135704	-0.0232939	0
88	-0.0132176	0.0106899	-0.0449972	0.0476439	-0.0240655	-0.00588962	0.0160894	-0.0231878	-0.0100616	-0.00667172	0
88.2	0.012965	0.00587676	-0.0247613	-0.0264462	-0.00725062	0.0121482	-0.00202285	-0.0249447	0.0122852	-0.032295	0
88.4	0.0247667	-0.0228379	0.0400476	0.0353089	0.0187738	0.00936147	0.00445675	-0.00444741	0.0143119	-0.0240189	0
88.6	-0.0119882	-0.0149078	0.0265928	0.132454	0.0341944	0.0329487	0.0649157	-0.0384646	0.0101101	0.0421295	0
88.8	-0.00340081	0.00176779	-0.0125868	0.0326243	0.039067	0.0556702	0.0403603	0.00743233	0.0345767	-0.00968442	0
89	-0.00625337	0.00939828	-0.0180142	0.0176024	-0.0319618	0.0164856	-0.00848985	-0.040462	-0.0351054	0.0159558	0
89.2	0.0175898	-0.0282389	0.0406791	-0.0263733	-0.00782781	0.00194442	0.00882328	0.0617488	0.0304511	0.0551361	0
89.4	-0.0182305	-0.0227452	0.00852894	-0.0145129	-0.0126362	0.0335862	0.0092216	0.0212332	0.0248838	-0.0175474	0
89.6	-0.0220832	0.00404473	0.0141501	0.000101853	-0.000469807	0.0238208	-0.0280973	-0.0386925	-0.059788	-0.0221346	0
89.8	-0.00919707	-0.0121592	0.0243764	-0.0376722	0.0177067	-0.00841611	-0.0329253	0.0001608	-0.0556132	0.0349977	0
90	-0.0351065	-0.0349884	-0.034586	-0.0559748	-0.0342622	0.00256224	-0.00388239	-0.0121437	0.0114745	0.00837759	0
90.2	0.0161865	-0.00571686	0.037514	-0.0362994	-0.0351081	-0.00136731	0.00545293	-0.0267771	0.0101941	0.0138651	0
90.4	-0.00834315	0.0216129	-0.0139113	-0.0115406	-0.0140179	-0.00855864	0.0443229	-0.0152766	0.0072108	-0.00485023	0
90.6	0.00769913	0.0102571	-0.0699661	-0.0336657	0.0292729	0.000336309	-0.0241696	0.0198555	0.0321169	-0.0283621	0
90.8	0.0194109	0.00421509	-0.00161631	0.00617651	0.046561	-0.0222612	-0.0251905	-0.00489282	0.0530587	0.00354164	0
91	0.0242837	-0.0144328	0.0682657	0.0327459	0.00846268	-0.0314578	-0.00544988	-0.0453864	0.0207474	-0.00115741	0
91.2	0.0346107	-0.0151975	0.0198491	0.0275814	-0.0201286	-0.0184509	-0.0151103	-0.0183415	0.00650909	-0.0568137	0
91.4	0.0108483	0.039506	-0.0458521	0.0831615	0.00989478	-0.0164807	0.0377127	0.032643	0.043756	-0.0489124	0
91.6	0.000658441	0.0229783	-0.0114123	0.0476009	0.012315	0.0318174	0.00788916	0.0290433	-0.0275193	-0.0196041	0
91.8	-0.011147	-0.00234509	0.0228038	-0.0244511	-0.031445	-0.0217374	-0.0072892	-0.00354911	-0.0461744	0.0107258	0
92	0.00873297	0.00727006	-0.0162942	-0.00679429	-0.0205182	-0.0153555	-0.0132189	0.0242945	-0.0141476	0.013778	0
92.2	-0.00108572	-0.00842482	0.0175537	0.0327508	0.0106783	0.0105547	-0.00612336	0.0348001	-0.0394548	0.00396573	0
92.4	-0.0185248	0.00627573	0.0742547	0.0271212	0.00718651	0.000282992	0.0125172	0.0130255	0.00431901	0.0158503	0
92.6	0.00887113	0.0543248	0.0372139	-0.00355592	-0.00204701	0.000975775	0.0169309	0.0139295	0.0871904	0.0373599	0
92.8	0.0262464	0.0237566	0.00158884	-0.0181591	0.000230327	0.0156	-0.00427827	0.0183267	-0.0229576	0.0241738	0
93	0.021774	0.0458634	-0.0301918	0.0288239	-0.0242321	0.0445874	-0.0280328	0.0414054	-0.0230566	-0.0147717	0
93.2	-0.0186928	0.0359738	-0.000230664	-0.0187352	-0.0162772	0.0461782	0.0382702	0.0540662	0.0062187	-0.0497035	0
93.4	0.0017978	0.0459095	0.0474494	-0.0616268	0.019113	0.00131818	0.0476609	0.00225916	-0.00787174	-0.0103004	0
93.6	0.0126007	0.0213729	0.0320387	-0.063726	0.0152131	0.00708996	-0.00856891	-0.0369427	-0.00174191	0.0109896	0
93.8	-0.0129034	-0.0261343	-0.00953468	-0.0325391	0.00948189	0.0121595	-0.000367161	-0.0130991	0.0255422	-0.000292051	0
94	0.00425995	-0.0144805	-0.0185554	0.00716492	0.0303695	-0.046952	0.043911	-0.0117738	0.00852949	0.0349213	0
94.2	0.0155108	-0.0233595	-0.0438707	-0.0276166	-0.017408	-0.025616	-0.00945049	-0.0676427	-0.00583339	0.0306635	0
94.4	-0.00351027	-0.0389022	-0.0450328	-0.0158388	-0.0324074	-0.0397153	-0.0218889	-0.0412799	0.0327842	-0.0433842	0
94.6	0.00179744	0.0100292	-0.0118551	-0.0144072	-0.0252655	-0.00206978	0.0127011	0.0467123	-0.0256617	-0.016639	0
94.8	-0.005033	-0.00702645	-0.00148277	-0.069965	-0.0120132	-0.00768024	0.00695965	0.0352888	-0.010702	0.0139513	0
95	-0.0326504	-0.047267	-0.0233631	-0.0167272	0.00109367	-0.0189772	-0.00877311	-0.0106066	0.0144052	0.00972222	0
95.2	-0.0232257	-0.0323625	-0.0380071	0.0654383	0.00135928	0.00685555	0.00951053	0.00233179	-0.0403605	0.0377177	0
95.4	0.0245885	-0.0328183	-0.0184651	-0.00689722	-0.00452387	0.0035013	-0.00168263	0.00392138	-0.0250811	0.0468866	0
95.6	0.0200791	-0.0199838	0.0200399	0.05063	0.00470319	0.0486581	-0.0450118	0.00747201	-0.00817615	-0.0263489	0
95.8	-0.03815	-0.0202795	-0.0122881	-0.0157605	-0.00318306	0.00271198	-0.00902679	-0.00667011	-0.032726	-0.0380597	0
96	-0.045422	-0.00116373	-0.0174973	-0.00491197	0.00668766	-0.0268228	-0.0531507	-0.0608713	0.0254555	0.00576426	0
96.2	0.00735528	0.0300131	-0.00172514	0.0616703	0.00855289	-0.0332703	-0.0153121	-0.043693	-0.00540606	0.0113462	0
96.4	0.0163293	0.0327889	-0.0152488	0.0429088	0.010334	-0.0126384	0.0617123	0.00417426	-0.0408591	-0.0292031	0
96.6	-0.013741	0.00351318	-0.00186368	-0.0197288	0.0167934	0.0292983	0.00137565	0.0149942	0.0249459	-0.0411934	0
96.8	0.0130546	-0.0195245	0.0641777	-0.0301058	-0.0180551	0.00847001	-0.0261744	0.0433813	-0.0313804	-0.00738396	0
97	-0.00756628	-0.0100957	0.0398441	-0.0091169	-0.0194702	-0.00278944	0.0141176	-0.039769	0.00191725	0.00499274	0
97.2	0.00860742	0.0293084	0.0338108	-0.0495732	0.00109944	-0.0412873	0.0230154	0.00312658	0.0396173	0.0231868	0
97.4	-0.0239702	0.00798133	-0.0034633	-0.0345817	-0.0137954	-0.00528783	0.00356168	0.00260197	0.101369	0.00277066	0
97.6	-0.0279133	-0.0232085	-0.0180023	0.0157629	-0.00323147	0.043207	0.0248751	0.00876391	0.0426039	-0.0245829	0
97.8	-0.00286099	-0.0200038	-0.00970393	0.00946761	0.0124596	0.0170315	0.0126004	0.0376649	-0.0829886	-0.0151917	0
98	-0.0188384	-0.0235976	-0.0528971	-0.00893824	-0.00545547	-0.019078	-0.0620341	-0.0122264	-0.0453007	-0.00249509	0
98.2	0.0490769	-0.00921521	-0.0297771	0.0135096	0.0506877	-0.0134302	-0.0165548	0.0313772	0.00319363	0.00463357	0
98.4	0.0173503	0.0038925	0.0517128	-0.00540279	0.0169193	0.0171976	0.00329652	0.0321332	-0.0550796	0.0434956	0
98.6	0.0312645	0.0185801	-0.0204103	0.0128046	-4.39364e-05	0.0177447	0.0144435	-0.00682067	0.0177749	0.00626515	0
98.8	0.014871	-0.0172233	-0.0454406	0.00371168	-0.0172086	-0.0224358	0.0116603	-0.0344146	0.102268	-0.0355733	0
99	-0.019718	-0.022601	-0.041189	0.00180126	-0.0300354	-0.00796918	0.013838	-0.0064113	0.0663031	0.0135023	0
99.2	-0.0137373	0.0268632	-0.0810346	0.025153	-0.00915786	0.0127171	0.00371316	0.0190709	0.00422855	0.0550811	0
99.4	-0.0111737	0.0116348	0.0063054	-0.0184303	-0.00189308	-0.0686561	-0.0424189	-0.0217618	-0.00184598	-0.00586098	0
99.6	0.0526935	-0.00240238	0.0813179	-0.0283541	-0.00163908	-0.0519024	0.000742477	-0.00848179	-0.00708539	-0.000247019	0
99.8	-0.0114228	0.0186431	0.0278981	-0.0157582	-0.0107156	-0.0184466	0.0255698	-0.00432423	-0.0417421	0.0588037	0
100	0.0158212	0.0300493	0.0452777	0.0354775	0.0201729	0.0609419	-0.023367	0.0249078	-0.0199528	-0.037935	0
100.2	0.00811299	0.0135477	0.0632951	0.0589756	0.018428	0.0482302	-0.0419426	0.0140621	0.00397663	-0.0670582	0
100.4	-0.0315276	0.0101225	0.0385929	0.038444	-0.019351	-0.0170585	0.00113096	-0.0517819	-0.033678	0.00361406	0
100.6	0.025266	0.0111211	0.0289045	0.0165262	-0.00984266	-0.00695756	0.0173188	-0.0527868	-0.0543648	-0.0127494	0
100.8	-0.00309618	-0.0173599	-0.0241101	-0.0207821	0.011727	-0.0252632	-0.00297526	0.0169087	0.00770086	-0.0150892	0
101	-0.00946136	0.0314338	-0.000905748	-0.0337182	-0.0133676	0.0076929	0.0177342	-0.013501	0.0356205	-0.0416282	0
101.2	-0.00829385	0.0164968	-0.00847153	0.0423144	-0.00143126	0.0437147	0.0240296	0.00722458	-0.00839439	0.0069092	0
101.4	-0.00751924	0.00248536	-0.0589139	0.024645	-0.014956	0.00868052	0.0391653	-0.00454687	-0.0157414	0.0230181	0
101.6	-0.00912802	0.0243286	-0.0934197	-0.049539	-0.0283903	-0.0365176	0.0220898	-0.00162527	0.0157154	0.0202459	0
101.8	-0.0015889	-0.00306465	-0.0657962	-0.0121428	-0.00913799	-0.000961819	-0.0100161	0.040588	0.0261535	0.0400665	0
102	0.0146001	-0.0653769	0.0177203	0.0462375	0.00958368	0.0586366	0.00502322	0.0193751	0.0291994	0.00955577	0
102.2	-0.00167877	-0.0366665	0.075889	-0.0464588	0.0504584	0.0280065	-0.0242306	0.0243034	0.0291141	-0.0252126	0
102.4	-0.00548945	-0.00894933	0.0467121	-0.0541917	0.0152306	0.0052047	-0.0429168	0.0473007	-0.0266785	0.0410235	0
102.6	0.00719324	-0.00967595	0.00646041	-0.000345059	0.0066467	-0.0101615	0.0169095	-0.0319691	-0.00815299	0.0222377	0
102.8	-0.00830976	0.00869983	0.00490908	-0.012315	0.0208313	-0.00609303	0.0314231	-0.0444168	-0.0317607	-0.000748086	0
103	-0.0100491	0.0264864	0.0333584	-0.00496024	0.00595326	0.00445859	-0.00973875	0.00629387	-0.0329359	-0.00992813	0
103.2	-0.00248065	0.00543635	0.0475834	0.0386101	-0.0333252	-0.00463211	-0.000473424	0.00574424	0.0506959	-0.023989	0
103.4	-0.0404364	-0.0129437	0.010582	-0.0162516	-0.0443275	-0.0157914	0.0161389	0.0213349	0.0304323	0.024057	0
103.6	0.00274077	0.0001028	-0.0405333	-0.0134521	0.0151892	-0.0184362	-0.0478992	0.0145529	-0.00451663	-0.0197435	0
103.8	-0.000657313	4.86109e-05	-0.0474003	-0.0169796	-0.00846306	-0.0119521	-0.0173331	-0.00355333	-0.0207735	0.0122527	0
104	-0.000383502	0.00155092	-0.0236746	0.0292662	0.00273221	0.00241112	0.00199567	-0.0144204	0.0262776	0.0102291	0
104.2	0.00383642	0.00996689	-0.0379236	0.00976478	-0.00138935	0.0147393	0.00664697	-0.0179749	0.000861243	-0.0383645	0
104.4	-0.0132106	0.00671597	-0.0447115	-0.0377997	-0.028569	0.0137518	0.0210472	-0.00778722	-0.0699439	-0.023803	0
104.6	-0.00841834	-0.00782565	-0.00174131	-0.0282592	-0.00367288	0.0143654	0.0162152	0.0129782	-0.0295385	0.0310547	0
104.8	0.018714	-0.0162688	-0.00568717	-0.0909474	-0.0118099	0.0222441	0.0136207	0.0310235	0.00876298	0.0180573	0
105	-0.000251197	-0.0154659	0.000886773	0.00571383	0.0115635	-0.018052	-0.0505692	0.0673378	-0.0564743	-0.004343	0
105.2	0.0193118	0.0301171	0.00144802	0.0150815	0.0328513	0.00895716	-0.00899301	0.00218566	-0.0272645	-0.0419317	0
105.4	0.0415608	0.0088265	0.0050374	-0.0340762	0.0103513	-0.0215659	-0.0217928	-0.0447421	0.0858811	-0.0204742	0
105.6	0.010537	-0.0166543	0.0117944	-0.00794491	-0.0228162	-0.062832	0.00253927	-0.0575183	0.0699013	0.0188878	0
105.8	-0.00852822	0.00398983	-0.00939602	0.0123246	-0.0367294	-0.00673237	0.0446125	-0.0600578	-0.026737	0.0296609	0
106	0.0158498	-0.0170543	-0.0358817	-0.0424388	-0.0162968	0.0367523	-0.066399	-0.00635018	-0.0120365	0.0248122	0
106.2	-0.026613	-0.0141514	0.0153788	0.012113	0.0539834	-0.000974305	-0.00987724	0.0144331	-0.0207655	-0.0457391	0
106.4	-0.0177273	0.00131677	0.0684716	0.109526	0.00588456	-0.00536303	0.00545804	0.0185681	0.0277011	-0.0161419	0
106.6	-0.0143742	0.0293412	0.0298102	0.0658102	-0.0284845	0.0014915	0.0385032	-0.0222724	0.0561286	0.0241054	0
106.8	-0.00519437	0.0292456	6.79928e-05	-0.0267774	-0.000461314	0.0137368	-0.00332045	-0.0394456	-0.00673329	0.0314124	0
107	0.00248979	-0.0118108	0.0576809	0.000349501	0.00385892	0.0126704	-0.0263495	-0.0328822	-0.0203408	0.029714	0
107.2	0.000255737	-0.0265808	0.0746589	0.0394057	-0.0061535	-0.0235132	0.0328497	-0.00564309	0.0510142	0.00608443	0
107.4	0.0184704	0.0176009	-0.0304292	-0.0337417	0.0265519	-0.0344114	-0.00831795	0.0708612	0.0278246	-0.0315296	0
107.6	-0.0285153	0.0214563	-0.0356835	0.0543158	-0.00970391	0.0194582	0.0481735	0.0355083	0.00245695	-0.00552751	0
107.8	-0.00137457	0.012253	-0.0138162	0.0402111	0.0182246	-0.00195621	0.01821	0.0622255	-0.0321376	0.00925388	0
108	0.0101741	0.00584462	-0.0189991	0.0410564	0.0259712	0.0077021	-0.00597297	0.0335036	-0.0405042	-0.042109	0
108.2	-0.00420777	-0.00798239	-0.00404842	0.0236962	-0.000159863	0.0221453	-0.00154938	-0.0175556	-0.0219746	-0.0456025	0
108.4	0.00846409	-0.0103876	0.0240307	-0.0358786	0.0051114	0.0334423	0.00112353	0.00275034	-0.02841	0.0107944	0
108.6	0.0209055	0.00972913	0.0192286	-0.0192213	0.0269963	0.0528281	0.0234442	0.0252953	-0.0449247	0.0221881	0
108.8	0.0124525	0.0101096	0.0093368	-0.0205789	0.020602	-0.0342872	0.00936718	0.015484	-0.00816246	0.0183439	0
109	0.00148633	-0.00701813	-0.0203415	-0.0734024	-0.00650415	0.00109459	-0.0349099	0.0196056	-0.0112398	-0.00266802	0
109.2	-0.00758821	-0.0291226	-0.0152744	0.0406867	-0.0279594	-0.0177464	0.00219293	-0.0834743	0.0133059	-0.0154196	0
109.4	0.0277859	-0.00992667	0.00628791	0.0652359	0.00044639	0.000628826	-0.0137797	-0.0632708	0.013093	0.0102534	0
109.6	0.0531945	-0.00381118	-0.0111742	-0.00429933	0.0200404	0.0333182	-0.0542257	-0.0294425	0.00253823	0.0262455	0
109.8	0.0108738	-0.00810613	-0.0145339	-0.00971147	-0.00276012	0.0154218	-0.00566447	-0.0447555	-0.00578633	0.00468087	0
110	-0.0225076	0.0368539	0.041829	-0.0267214	0.00104482	0.0231662	0.0303864	0.0565718	-0.0367091	-0.0141462	0
110.2	0.0102478	0.0187255	0.0137084	-0.0222462	0.0155836	-0.0274282	-0.0206519	-0.0388275	0.0179639	-0.0259628	0
110.4	0.00192111	0.0372921	-0.0331236	-0.0615863	-0.00379142	-0.0225066	-0.0240056	-0.0174404	0.00539914	0.016095	0
110.6	0.0329526	0.0132072	-0.0329451	-0.0107881	-0.0110893	-0.0175148	-0.0622682	-0.0136928	-0.00545882	0.00724805	0
110.8	0.0367454	0.011549	-0.00352996	-0.0260939	-0.0121746	-0.0105399	-0.0247605	0.0261811	0.0223233	0.0195017	0
111	0.00178558	0.0132581	0.0303146	-0.0576603	0.0114937	0.00375244	0.0324957	0.0811496	0.0457419	0.00713211	0
111.2	-0.00302056	-0.0152854	0.0366264	0.0122761	0.0379554	-0.00171569	0.000376793	0.0287763	0.0599654	-0.0563745	0
111.4	-0.0173882	0.0184811	-0.00478396	-0.00461447	-0.0118583	-0.00208834	0.0232076	0.00103647	0.0708901	0.00515863	0
111.6	-0.0192307	-0.041322	-0.00991425	0.042514	-0.0159975	-0.00291147	-0.00118174	0.0255514	0.014712	0.0197533	0
111.8	-0.0403393	0.000195111	-0.0508524	0.048855	-0.0177399	-0.0448711	0.0147707	0.000221803	-0.0449697	0.0399255	0
112	-0.0379124	-0.0248128	-0.016647	0.0159497	-0.0349569	-0.0280637	0.0181977	-0.0297061	-0.0547414	0.0252318	0
112.2	-0.00528145	-0.0450728	0.0272989	0.00320057	-0.00906397	0.00060234	0.00727881	0.00527465	-0.0288452	-0.00771458	0
112.4	0.0143036	0.00390208	-0.0036098	0.0346773	0.0195887	-0.00293278	0.00268947	0.0277686	-0.0130904	-0.0032362	0
112.6	0.00594151	-0.0102111	-0.0248475	0.0471397	-0.00690573	0.00271687	0.00741895	-0.0144927	-0.00561025	0.00367291	0
112.8	-0.00575375	-0.0075169	-0.00253033	-0.0240694	0.00600857	-0.0169919	0.0647424	0.00577737	0.0193033	-0.0254552	0
113	-0.00634833	-0.0281402	0.0521038	0.0132208	-0.00292199	0.030728	0.0443841	0.0185282	-0.0205329	-0.0130767	0
113.2	-0.00549316	0.012641	0.0494534	0.0382381	-0.0183737	0.00539081	-0.0268081	-0.0273538	-0.00576348	-0.0173437	0
113.4	-0.00969272	0.0324687	0.0114012	0.0161163	0.00369309	0.00302354	-0.0441865	-0.0329172	-0.00319509	0.01935	0
113.6	-0.0170543	0.00119523	-0.0126575	-0.0256603	0.033672	-0.00379703	-0.0205223	-0.0256573	-0.0182071	0.0173198	0
113.8	-0.025168	0.0117944	-0.0267174	-0.0531795	0.027087	-0.0416399	-0.0277562	-0.0456103	-0.00106724	-0.0379717	0
114	-0.0159664	0.0551493	-0.0178005	-0.0377243	-0.00235757	0.0113205	-0.0307108	-0.018029	0.00738323	0.00770488	0
114.2	0.0208432	0.0105689	0.0303073	-0.0444655	-0.0278021	-0.00019132	0.0299655	-0.0104987	0.0246156	0.0199361	0
114.4	-0.0192145	-0.0448166	-0.0569673	-0.045199	-0.0112396	-0.0190544	0.00319314	-0.00828299	-0.0362966	-0.00752851	0
114.6	-0.0212645	-0.0549053	-0.0428074	-0.0629698	-0.0262748	-0.0184674	-0.0238242	0.0652504	-0.0228334	-0.0115928	0
114.8	0.00982961	-0.0159228	0.0628135	-0.0421446	-0.0122181	-0.002195	-0.024914	0.0373448	-0.00890945	-0.0117045	0
115	0.0164798	0.00338947	0.0662841	0.0106801	0.0187004	0.00138208	0.0133127	-0.0683244	-0.0124867	-0.0185648	0
115.2	0.0224779	-0.00149138	-0.0179111	0.0246366	0.00436466	-0.00358134	0.0381403	-0.0321937	0.0326863	-0.0045561	0
115.4	0.0283893	0.0318769	-0.0398819	0.0396668	0.0169963	0.027025	-0.0497691	0.0464124	0.00699056	0.0123744	0
115.6	-0.0061942	-0.0268136	-0.0106121	0.0825967	-0.00242598	0.0311468	0.0154439	-0.00234703	-0.0152866	0.013881	0
115.8	-0.0317624	0.0207677	0.0190823	0.0192044	-0.00271269	0.0151576	0.0429726	0.0798681	0.0302384	0.010419	0
116	-0.0129237	0.0151182	0.000272645	0.0320377	-0.00493348	-0.000933537	0.0428961	0.0834407	0.00513436	0.0321383	0
116.2	-0.00173248	-0.0184053	-0.00254792	0.0561527	-0.00772564	-0.00680546	0.0274502	0.00340577	-0.0104862	0.0548384	0
116.4	-0.0162452	-0.00231139	0.0159446	-0.0137305	0.00102791	-0.00268584	-0.0188226	-0.00214512	0.0257545	0.012415	0
116.6	-0.0113802	-0.0216749	-0.00942159	-0.0391432	-0.0071715	0.000893316	-0.0458174	0.00136422	0.00327315	-0.0502269	0
116.8	-0.00270552	-0.00643795	-0.014748	-0.0217444	-0.0245151	-0.00283862	-0.0411473	-0.0230602	0.026622	-0.0109859	0
117	-0.00204121	-0.0191377	-0.0418632	-0.0174169	-0.00651024	0.00242211	0.0393118	-0.022776	0.0362155	-0.0382783	0
117.2	-0.0198693	0.021369	-0.0817129	0.0117326	-0.0027591	0.025185	-0.0050012	-0.0194656	0.0449407	-0.00863517	0
117.4	-0.0248202	0.0236341	-0.00169099	-0.00172336	0.00428303	0.0189991	-0.00798518	-0.0204016	0.0414099	-0.00731509	0
117.6	0.0287308	0.0148781	0.059111	-0.0471768	0.00771381	-0.020171	0.0108478	0.00514575	-0.00676397	-0.0398635	0
117.8	0.0745285	0.0492376	-0.0058689	-0.0471559	0.00649999	-0.0144857	-0.0282096	0.00945266	-0.035726	-0.0547902	0
118	0.0232596	0.0156794	0.000599683	-0.0254226	0.02863	0.0340997	0.0231021	-0.061953	0.00054913	-0.0795887	0
118.2	0.00722862	-0.00558238	0.0164311	-0.00516172	-0.0038836	-0.0198776	-0.0218301	-0.0539752	-0.0507707	0.0475548	0
118.4	0.0216002	0.0244298	0.0275254	0.0415149	0.00488434	-0.0289742	0.00716249	0.0200205	-0.0502856	0.0465412	0
118.6	-0.0224862	0.00185014	0.0121847	0.0576917	0.0135819	-0.0120584	0.017019	-0.00245006	-0.0231388	0.0385258	0
118.8	-0.0483109	-0.0332842	-0.019289	0.0216154	-0.00304888	-0.0125726	0.0127074	-0.0231149	-0.00515972	0.0564537	0
119	-0.0284221	-0.0340723	-0.0258751	-0.00231561	-0.013154	-0.0358892	0.0149729	0.0136397	0.00685577	0.011938	0
119.2	-0.0328449	-0.0271438	-0.00891899	0.0131792	-0.00688251	-0.062238	-0.0180425	0.0272067	-0.0026211	-0.0280931	0
119.4	-0.0306021	-0.00859344	-0.0243932	0.00475864	0.00237093	-0.0410437	-0.0250055	0.0540169	-0.0219512	0.016492	0
119.6	-0.0322915	-0.0489884	-0.0515902	-0.0144197	0.0102357	0.000379501	-0.0293743	0.0112437	-0.00203965	-0.00894852	0
119.8	0.00697409	0.00317218	0.0356613	-0.0319309	-0.0212598	0.0117932	-0.0118792	-0.0133382	-0.00890814	-0.011197	0
120	0.0382686	0.0163367	0.0563789	-0.00400628	-0.0241301	0.00115107	0.0320391	0.0114921	0.00638624	0.0602396	0
120.2	0.044496	-0.00975035	0.00810247	0.0279412	0.00638168	0.0253583	0.0345301	0.016744	0.0278979	0.0262032	0
120.4	0.0446532	0.0113221	0.0325759	0.0121396	0.0149136	0.0382381	-0.0144996	0.034525	0.0229972	-0.0562631	0
120.6	0.0297642	0.0129738	0.083046	0.00920643	0.00286541	-0.00306049	-0.0397997	0.100885	0.0290262	-0.00599463	0
120.8	0.0187829	0.00402034	0.0676143	0.0578901	0.0106134	0.0410196	-0.0323936	0.0556367	0.0293377	-0.0620841	0
121	0.0395224	0.0434201	0.0238322	0.0135938	0.0721064	0.0402576	0.0127519	0.0468621	0.0569974	0.0206274	0
121.2	0.0301439	0.0670682	0.0704838	0.0189633	0.0782535	0.0279216	0.00811098	0.0418903	0.0467284	-0.00645582	0
121.4	0.0193062	0.0153006	0.0720493	0.0926129	0.0436404	0.0350524	0.0433902	-0.00619783	0.0110258	-0.039545	0
121.6	0.0564178	0.0090358	0.0416242	0.0943253	0.0413288	0.0525844	0.0522737	0.0379766	0.00124089	0.00622545	0
121.8	0.0738657	0.0584748	0.0881665	0.0471538	0.0727304	0.0588832	-0.0129757	0.135046	0.00406718	0.0217073	0
122	0.0148228	0.0106964	0.104496	0.0951774	0.094692	0.0393356	0.0243092	0.0586351	-0.0233414	0.0288042	0
122.2	0.0167598	0.0478804	0.09339	0.0970793	0.0858204	0.0472884	0.02326	0.057019	-0.0476078	-0.0168564	0
122.4	0.0118133	0.0157304	0.0611571	0.0356432	0.0844488	0.07493	0.0478055	0.0766708	0.00639804	-0.00715705	0
122.6	0.0535013	0.0400434	0.048008	0.0676066	0.0692805	0.0523948	0.0229541	0.038849	-0.0178623	-0.011796	0
122.8	0.0734393	0.0699906	0.0354859	0.0580531	0.0690944	0.0348553	-0.00186878	0.0650004	-0.00590906	-0.0485893	0
123	0.0853044	0.0575895	0.0622539	0.0221445	0.135669	0.0742269	0.052452	0.113779	0.0833071	-0.0563768	1
123.2	0.171487	0.11495	0.163809	0.125143	0.174781	0.141057	0.11966	0.0897154	0.0757487	-0.0158961	1
123.4	0.200736	0.178734	0.207807	0.13968	0.0766468	0.220309	0.142937	0.167796	0.0484734	0.0266122	1
123.6	0.212405	0.182444	0.175721	0.0811072	0.102979	0.233259	0.15282	0.163358	0.0780246	-0.0151683	1
123.8	0.163565	0.204217	0.134049	0.213103	0.0957665	0.237929	0.0840246	0.097616	0.106005	0.00724409	1
124	0.179172	0.208384	0.180784	0.19407	0.0370811	0.233616	0.140645	0.0885692	0.176713	0.0159771	1
124.2	0.170233	0.169042	0.191884	0.110396	0.016773	0.238808	0.181897	0.11003	0.137616	0.00781435	1
124.4	0.112569	0.158148	0.104684	0.167996	0.0535303	0.227593	0.1125	0.103538	0.0373052	0.0145027	1
124.6	0.158107	0.167451	0.0985957	0.11765	0.0866069	0.161026	0.142	0.0885372	0.128083	-0.0186368	1
124.8	0.0933484	0.0813768	0.146124	0.0745085	0.0499386	0.169063	0.0817813	0.0472784	0.0988117	0.00435972	1
125	0.0485623	0.0960619	0.0764196	0.0853528	0.0569987	0.160478	0.149511	0.0567358	-0.000154472	-0.0133856	1
125.2	0.0576527	0.0617236	0.0720358	0.12671	0.0643737	0.122507	0.14454	0.0902584	0.0104633	-0.0541732	1
125.4	0.0806621	0.0736912	0.0924083	0.0909332	0.0333708	0.135102	0.110888	0.110287	0.0733143	-0.0817873	1
125.6	0.0789518	0.09963	0.0951639	0.0859603	0.00162245	0.145049	0.111988	0.0749846	0.0352733	-0.0450152	1
125.8	0.0458378	0.0360422	0.129124	0.152975	-0.00515096	0.107403	0.0969534	0.0550208	-0.0582188	0.0141682	1
126	0.014323	0.0576859	0.1216	0.0679601	0.00423231	0.125252	0.124733	0.145212	-0.0472164	-0.0260755	0
126.2	0.0093463	0.0379016	0.11942	0.0369598	0.0421912	0.106344	0.115915	0.0934449	-0.00591967	-0.039615	0
126.4	0.0397965	0.0852303	0.0737323	0.0266901	0.00978146	0.0738167	0.16744	0.0211718	0.0311618	-0.0451639	0
126.6	0.0563274	0.0644954	0.0759738	0.018735	-0.00728379	0.0657855	0.117412	0.0390182	0.0227589	-0.0116321	0
126.8	0.0455798	0.0593953	0.0635418	0.00571345	-0.0129626	0.0671919	0.0768752	0.0823847	-0.00176034	0.0216339	0
127	0.033124	0.108478	0.0580432	0.00136528	-0.0310682	0.0680231	0.0881304	0.0520015	-0.0136084	0.0047759	0
127.2	0.00758391	0.0494407	0.092717	0.0256507	-0.0180447	0.0710392	0.0457859	0.00209171	-0.0260396	-0.0236319	0
127.4	-0.0361824	-0.00767784	-0.0438588	0.0399703	-0.0246415	0.0589657	0.13337	0.0461404	-0.0277619	-0.0426168	0
127.6	0.0147774	0.0259166	0.0112615	0.0434909	-0.0350088	0.0736336	0.0790605	0.0315267	-0.0547273	-0.0820046	0
127.8	0.00337585	0.0333345	0.0383666	-0.0580176	0.00281847	0.0604786	0.0536675	0.0754829	-0.0487655	-0.0488069	0
128	0.0130529	0.0187773	0.00257355	-0.0212608	-0.0125204	0.044214	0.037018	0.0859169	0.017797	0.0212942	0
128.2	0.0451132	0.0087268	-0.0389933	0.0257097	-0.0305388	0.0645238	0.0242184	0.0221597	0.0414888	0.0200916	0
128.4	0.0185624	0.0108374	-0.0528692	-0.052794	0.00197522	0.0624777	0.0317842	-0.0200859	-0.0149656	-0.0296356	0
128.6	0.00568147	0.0155115	0.00376695	0.00426151	-0.029154	0.00765796	-0.0212995	-0.00587077	-0.032877	-0.0327948	0
128.8	-0.00103504	-0.0549874	0.0057283	0.00563794	-0.0419504	0.0278257	-0.0194064	0.0494433	-0.00927002	-0.0327704	0
129	0.000119156	0.0142807	0.0365605	-0.0108846	-0.0186428	0.0291614	-0.025087	-0.0499817	-0.0177008	0.00523824	0
129.2	0.016718	0.0158027	0.0172691	0.00276951	0.0176714	-0.0173488	-0.0149779	-0.047968	0.00243359	0.0243769	0
129.4	0.019146	-0.0280028	-0.00837704	0.0523513	0.0234146	0.00550373	0.0137071	-0.0132442	0.0142027	0.000804957	0
129.6	-0.00819134	-0.0155368	0.0363709	0.0378072	-0.002458	0.0357816	0.0229391	-0.0338233	-0.0174407	-0.0201749	0
129.8	-0.0157081	-0.00437075	0.0683695	-0.035263	-0.033844	0.00226292	0.00589449	-0.0172537	-0.0112052	-0.0358999	0
130	0.0222278	-0.00616244	0.0197539	0.00648501	-0.0346453	0.04935	0.000737227	-0.0236623	0.0457639	-0.0617631	0
130.2	-0.00111576	-0.0390811	0.0246656	0.0042197	0.0675241	0.00370549	0.0295538	0.0168306	0.0106375	0.00660685	0
130.4	-0.0416404	-0.0224625	-0.0337007	-0.0193451	0.0303945	-0.0274322	-0.00334864	0.0365895	0.010999	-0.0182728	0
130.6	-0.0591949	-0.0330558	-0.0653317	0.00391448	-0.0292848	-0.0347307	0.00619789	0.0377561	-0.0193396	-0.0142924	0
130.8	-0.0459865	-0.0411671	-0.0491015	-0.0236012	-0.0126945	-0.0193329	0.0019497	0.0337608	-0.0600968	0.0200823	0
131	-0.00781452	0.00305137	-0.0492415	-0.0719716	-0.00133592	0.000662093	-0.0322265	0.00290263	-0.0359746	0.0123777	0
131.2	0.0169892	0.0154672	-0.0439939	-0.00699483	-0.0158265	-0.0257051	0.00495265	-0.0359085	0.0153007	0.00582144	0
131.4	-0.00649963	-0.0241121	-0.0236564	0.0172114	0.000972431	-0.0400045	-0.0314973	-0.0237683	0.0565161	-0.0199731	0
131.6	0.000807584	-0.0494683	-0.0143979	0.0236055	-0.0034863	-0.0193929	-0.0468765	-0.0160013	-0.00173103	0.0787854	0
131.8	-0.00521199	-0.0220618	-0.0227021	0.018479	-0.00739797	-0.0142341	0.000595557	-0.0367016	0.035289	0.0371499	0
132	-0.0320011	0.00614402	-0.0146196	-0.0356032	-0.0173918	-0.000106688	0.0265777	-0.0182629	0.0246218	-0.0416515	0
132.2	-0.0290806	0.00994837	-0.0391861	-0.0418977	-0.0331319	0.0233457	0.0176974	0.0489363	-0.049615	-0.0328726	0
132.4	-0.00403668	0.0217642	-0.0295043	0.011431	-0.0262251	0.0166912	0.0141484	0.0245906	-0.0463294	-0.0150986	0
132.6	0.00294648	0.0326472	0.0985769	-0.00694097	-0.00932952	0.00420079	0.00384095	-0.0753871	-0.0348418	0.000559259	0
132.8	0.0371929	0.00641613	0.0145808	0.0518849	-0.0174065	0.0222389	0.0107958	0.074234	-0.00381759	0.00711086	0
133	0.011309	0.0528548	0.0261707	0.0674497	0.0230096	0.000990905	-0.00174902	0.039501	0.00576037	-0.0109191	0
133.2	0.0292403	0.043036	0.0320345	0.00977421	0.0157637	-0.0329416	-0.00611316	-0.0247833	0.0461608	5.36148e-05	0
133.4	0.0623508	0.0396954	0.0389268	0.00289966	0.0147919	0.0218785	0.0215379	-0.0182063	0.0176903	0.0253932	0
133.6	0.0305991	0.0406024	0.05631	0.045662	0.0359806	0.0697765	0.0259803	-0.00143214	-0.0366809	0.0187261	0
133.8	-0.00335377	-0.0220062	0.00525694	0.00538275	0.0138338	0.00298083	-0.0126666	0.0346468	0.0195534	-0.00211804	0
134	0.016085	0.012398	0.00162537	-0.051922	0.0298311	-0.00717496	-0.0162954	0.0461411	0.0388115	0.0121738	0
134.2	0.00496921	-0.0113504	-0.0113807	0.0623865	0.0221704	0.0143438	-0.0297694	0.0224195	0.00382587	0.0494687	0
134.4	0.00516898	0.00140479	-0.00468807	-0.035564	0.0131555	0.0221395	-0.0173891	0.00340373	-0.038955	0.0166642	0
134.6	0.0121665	-0.0112902	-0.0344804	-0.0653474	0.0450032	-0.0212322	-0.0229696	-0.00353815	0.00505825	0.0134621	0
134.8	-0.0103873	-0.0419167	-0.0228589	-0.013517	0.024097	-0.0337195	-0.0281049	-0.0126339	0.0493012	-0.00769477	0
135	-0.0197228	-0.0240403	0.0190355	-0.0789628	-0.0371453	0.00130543	0.00843592	-0.016586	0.0283287	-0.0603495	0
135.2	0.0238085	-0.00205515	-0.0231075	-0.0811372	-0.00529329	0.00139877	0.0287723	0.00210432	0.00600054	-0.0148341	0
135.4	0.0285417	0.0119512	0.0329558	-0.00190114	0.0045818	0.0240602	0.000309843	0.030535	-0.0617659	0.00530341	0
135.6	0.0224569	0.0334324	0.0605864	-0.00719407	-0.0246423	-0.0198801	0.0156945	0.0409098	-0.0151354	0.0207556	0
135.8	-0.00214133	0.0335887	0.0241956	0.0422448	0.000291957	-0.0330521	0.049891	-0.0414002	0.0178708	0.0240961	0
136	0.00256899	0.0295708	0.0290273	0.0388869	0.0259887	-0.0129487	0.0399969	-0.0982997	-0.00504329	0.000236996	0
136.2	0.0136133	0.0065941	0.0279705	0.0154837	0.00483617	0.0124334	0.0279431	-0.0308047	-0.0394506	-0.0309561	0
136.4	0.00191978	-0.0236003	-0.0217289	0.0708259	-0.00640253	0.0275395	0.0253506	0.0270402	-0.0313178	-0.0246199	0
136.6	0.0242486	-0.00150116	-0.0047516	0.0471791	0.000512319	-0.0130008	-0.0220069	-0.0202846	0.0521834	0.0137689	0
136.8	0.0002467	-0.0225104	-0.0406514	0.0748318	-0.0345382	-0.02518	0.0127762	0.0445339	0.0653373	0.00264053	0
137	-0.0434334	0.00340842	-0.0391911	0.0572228	-0.0228655	0.0353114	-0.0208959	0.0270342	0.0079813	0.0258957	0
137.2	-0.0237926	0.0207121	1.66909e-05	-0.00522965	-0.00293469	0.0424988	-0.0586066	-0.0444337	0.0111419	0.00690762	0
137.4	-0.000907202	0.00616637	0.018086	-0.0398955	0.0185293	-0.0077549	-0.0175437	-0.0350514	0.00777194	-0.0313446	0
137.6	-0.0129442	-0.000423171	0.012877	-0.0390488	0.0279297	-0.0123989	0.0267808	0.0100365	-0.0308756	-0.0161565	0
137.8	-0.0118839	-0.000248735	0.0141869	-0.0206765	-0.0145743	0.0318874	0.0110825	0.0100543	-0.0126863	0.000385074	0
138	-0.0272982	-0.0196569	0.00993708	0.0178889	-0.0323385	0.0321881	0.00363865	0.036527	-0.00124031	-0.021936	0
138.2	-0.0267369	-0.0578186	-0.0121603	-0.0200738	0.0203537	-0.0176226	-0.0255304	0.00301767	0.01675	0.0141553	0
138.4	-0.00361538	-0.0194731	-0.0339359	0.00789541	0.0224443	-0.0319689	-0.0449213	-0.0180293	0.0152606	0.0268375	0
138.6	0.0124725	-0.00996785	-0.00441902	0.00754307	0.00322598	-0.015404	-0.025082	0.0128377	-0.0126973	0.00286101	0
138.8	0.021847	-0.0220825	-0.00509283	-0.0177512	-0.0106284	0.0184995	0.0214649	0.0334617	-0.0216004	-0.000857871	0
139	0.0140586	0.0176462	-0.0406132	-0.0100176	-0.00296543	0.0276506	0.0431038	0.0131477	-0.0184341	0.0187973	0
139.2	-0.0232084	0.0243642	-0.00985182	-0.0284326	0.0278493	-0.017416	0.0195193	0.006528	-0.0331278	0.0211929	0
139.4	-0.0135576	-0.00856725	-0.0455624	0.00695006	-0.0462162	0.00112319	0.0126271	0.0138221	0.00112781	0.0108125	0
139.6	0.00834937	0.0455826	-0.0260036	-0.0386881	-0.00527091	-0.0223611	-0.00574077	-0.0430717	-0.0387648	-0.0175664	0
139.8	0.00947782	0.0153347	0.0145712	-0.0339383	0.00855895	-0.048863	-0.0288495	-0.088174	0.0161718	-0.00573294	0
140	-0.00549226	-0.00992389	0.0305536	0.0302605	-0.0129488	-0.0100211	-0.00804121	-0.0636144	0.0487212	0.0264247	0
140.2	-0.00510731	0.0204626	0.0412447	0.0574802	-0.00353658	0.0119477	-0.00795239	0.0215065	-0.0153055	0.00659694	0
140.4	0.0216494	0.00836857	0.0301821	0.0169459	0.00222042	-0.0211145	-0.0341499	0.0666605	-0.0192319	-0.0236088	0
140.6	0.0268484	0.0229135	-0.0300034	-0.0547452	0.004662	0.00995907	0.0321298	-0.0150152	0.0314911	0.0167317	0
140.8	-0.0184324	0.0421966	-0.0227983	-0.0482256	0.0160039	0.0160905	-0.00104421	-0.026978	0.0342052	-0.0174852	0
141	0.0205916	0.0273181	0.0291152	-0.00223546	0.0172551	0.00150905	-0.0137166	0.0147315	0.0101431	-0.0266917	0
141.2	0.0231558	-0.0145136	0.0361458	0.0113242	0.00478189	0.0157012	-0.020723	0.0346996	-0.0262069	-0.000272323	0
141.4	-0.0169795	-0.0443421	0.0146145	0.0120008	-0.00527729	0.0227864	-0.0230346	0.0838406	0.00205187	0.010421	0
141.6	-0.00294224	-0.0345375	-0.000846061	-0.00861595	0.01192	-0.00779007	-0.000639908	0.124914	0.0212632	-0.013845	0
141.8	0.0279167	-0.00466255	-0.0164976	-0.0673502	0.0315792	-0.0064095	0.0150237	0.0435551	-0.0589559	-0.026125	0
142	0.0138421	-0.00128163	0.00524529	-0.0436737	-0.00646088	0.0398746	0.0247443	-0.0409763	-0.0202146	0.0256912	0
142.2	-0.00366024	-0.00696134	0.027315	0.0354541	-0.0031253	-0.0373868	-0.0182838	-0.0560404	0.0266385	0.0134647	0
142.4	-0.00498624	0.0174907	0.0239375	0.0494277	0.0182907	-0.030622	-0.00552494	-0.104639	0.0200189	0.0171642	0
142.6	-0.00300165	-0.00311668	-0.0186005	-0.0325837	-0.0244287	0.0267249	0.00392184	-0.0552746	-0.00898685	0.0204746	0
142.8	-0.0109818	-0.0224346	-0.0422513	-0.0187439	-0.0504627	0.00709202	-0.017183	0.00556002	-0.00961413	-0.0272223	0
143	-0.024358	0.00274698	-0.0231997	0.0737903	-0.00589665	-0.0160555	-0.0126731	-0.033114	0.0220386	-0.065107	0
143.2	-0.0272801	-0.0154516	-0.0258896	0.0109714	-0.00279016	0.0267069	0.00765125	-0.00399847	0.0233556	-0.0283617	0
143.4	-0.0183565	0.0058385	-0.0280449	0.0216629	-0.00435051	-0.0131014	0.03622	-0.0105882	-0.030905	0.00793864	0
143.6	-0.0240641	0.00272296	-0.0319491	-0.0233706	0.00597254	-0.0159226	0.017219	-0.00368094	0.0139939	0.0178127	0
143.8	-0.00630415	-0.019704	-0.0262569	-0.00722802	0.0397117	0.018739	-0.0120856	-0.00476017	-0.0203894	0.0394064	0
144	0.0173675	-0.0357266	0.017263	0.0390214	0.0130443	-0.0220094	0.0119951	0.014134	-0.0362241	0.0348135	0
144.2	-0.00811627	-0.0282024	0.0176162	0.0338267	-0.0118681	-0.0475597	0.0335378	0.0313822	0.026698	0.00927321	0
144.4	-0.0365898	-0.00260156	-0.0249772	0.0166129	0.0321259	0.00316588	0.00290575	0.027117	0.0150344	0.00573399	0
144.6	0.00511718	-0.000102748	0.0518615	-0.0103956	-0.00113308	-0.0383828	0.00471288	0.0590656	-0.00570881	-0.00986618	0
144.8	-0.0270212	-0.0120852	0.0440241	-0.0231188	0.0278104	0.0539011	-0.0121378	-0.0288142	0.0398723	0.00346634	0
145	-0.0277179	0.00692501	-0.00721706	0.00423116	0.0151596	0.0235856	-0.0309635	-0.0206278	0.0248587	-0.0305664	0
145.2	0.00972826	-0.00564561	-0.00773676	-0.00748252	-0.0206706	0.000379132	-0.017974	-0.00668801	-0.0085653	-0.0633251	0
145.4	0.0351621	-0.0252139	0.0476059	-0.0270591	-0.0134222	0.0148995	-0.0154163	0.00141567	0.00258942	-0.0394729	0
145.6	0.0117101	0.00859373	0.0555205	-0.00126098	0.00272519	-0.00695581	-0.0162103	0.0301939	0.012216	0.00993769	0
145.8	-0.0161597	0.0355822	-0.00119174	0.0282739	-0.0128927	0.015691	0.0216619	0.00710863	-0.00539562	0.0366826	0
146	0.0533141	-0.000449767	0.0228391	0.0432907	-0.0138638	0.0320827	0.0144688	0.0412378	-0.000948346	0.0278992	0
146.2	-0.0082317	0.000439566	-0.0603706	-0.0343157	-0.0348656	0.0175918	0.0255133	0.034497	-0.0464675	-0.0102035	0
146.4	-0.00252572	0.0374474	-0.0403036	0.021093	-0.00259553	-0.0108652	0.0226421	-0.0103735	-0.0213971	-0.0154505	0
146.6	0.0168488	0.0366809	-0.0062303	0.0592637	0.0244789	-0.00560221	-0.00027004	-0.0317978	-0.00752694	0.0061113	0
146.8	-0.0188824	0.025193	-0.0151248	0.00146138	0.00162109	0.00231223	-0.0263379	-0.0211331	0.00586856	0.00995887	0
147	-0.0240542	0.0245926	0.00571253	0.00568204	-0.023886	-0.00649691	-0.0207647	-0.018107	0.0399459	0.0101597	0
147.2	-0.0161804	-0.0164803	-0.0154156	0.0225243	-0.0269555	0.0166807	0.017842	-0.0245467	-0.0308407	0.0264089	0
147.4	-0.0150163	-0.00411505	-0.00144083	-0.0608356	0.00363799	-0.00555915	-0.0172659	0.00826095	-0.00927433	-0.0163686	0
147.6	0.0206812	-0.0319361	0.00671106	-0.0287784	0.0136534	-0.0313935	0.0485404	0.0239189	-0.0261136	-0.0244021	0
147.8	0.0619304	-0.00613486	0.00471232	-0.0236181	-0.000379487	-0.0056833	0.0206692	-0.029064	-0.037827	0.0159416	0
148	0.0149623	-0.00822109	-0.00456641	-0.0282	-0.0123995	-0.0191309	0.00253761	-0.0160568	0.0345733	0.0501886	0
148.2	-0.0271062	-0.0464831	0.00434022	-0.00447646	-0.0267853	-0.0495058	0.0263635	0.0237239	0.0588997	0.0192961	0
148.4	0.0237449	0.00580585	0.0265653	-0.0421573	-0.0336543	-0.0147308	-0.0317433	-0.0236323	-0.0389137	-0.0197834	0
148.6	-0.00883792	0.034164	0.00143578	-0.0390062	0.00436389	-0.0268629	0.0200014	0.00255893	-0.0390366	0.0478343	0
148.8	-0.00273756	0.0101703	0.0178583	0.0454399	0.00612479	-0.00238035	-0.0395632	-0.0469501	0.0127788	0.0250641	0
149	-0.0309865	-0.0141324	-0.0104462	0.0502794	0.01731	-0.0394351	-0.0285954	-0.00454468	-0.00644182	-0.0344635	0
149.2	0.00296827	-0.00908376	0.0148784	-0.0462172	0.0144223	0.00974088	0.0077867	-0.000180595	-0.0185068	-0.0472341	0
149.4	0.0123533	0.00258354	0.0616207	-0.035763	0.00929218	0.0665261	-0.0309544	-0.0150095	-0.00132874	-0.0213999	0
149.6	-0.0246545	0.0188985	0.0174493	0.0410982	0.00626137	0.013229	-0.0322982	0.0343541	0.0191581	-0.00907103	0
149.8	0.0393528	0.0275259	-0.0336626	-0.0268491	-0.0255107	-0.0111313	0.0467797	0.0305455	0.0598073	-0.0235489	0
150	-0.00457192	-0.0370877	-0.00600904	0.00192103	-0.00180428	-0.0401802	-0.0124002	0.0231968	0.0445252	-0.0245637	0
150.2	0.0271277	-0.00366078	0.0249666	0.000683894	0.0333336	-0.00708531	-0.0285756	-0.0291676	0.0329896	-0.0248595	0
150.4	-0.00724971	-0.00368751	0.0295872	-0.031011	0.0168987	0.0334676	0.00453195	-0.00380538	-0.00212486	0.0123651	0
150.6	-0.0376149	-0.00875382	-0.0371224	0.0249112	0.00830347	0.0586436	0.0205879	0.00942144	-0.0176979	0.00769447	0
150.8	0.0101991	0.0248557	-0.0538782	0.058784	0.0134831	0.0320779	-0.00775968	0.0023019	-0.0327805	-0.0163842	0
151	0.0254884	0.023873	0.0102948	-0.0156057	0.00166679	-0.00723697	-0.0197227	0.0326614	-0.0545574	0.0161442	0
151.2	-0.0083505	0.00477073	-0.0574096	-0.00648061	0.0203702	0.0365935	0.0394526	-0.007574	-0.00508608	0.0215864	0
151.4	-0.0209628	0.00700211	-0.0708691	0.00882545	0.00948353	-0.0216757	0.0140217	-0.00819446	-0.0322764	0.0128138	0
151.6	-0.00713304	-0.026844	0.00553779	0.0283731	-0.0256991	-0.00161438	-0.0159356	-0.0423153	0.0234234	0.0349569	0
151.8	0.00765185	-0.019332	0.033335	-0.0212967	-0.0218971	0.00515962	0.015547	-0.0391045	0.0327224	0.0108415	0
152	0.0151443	-0.00200624	-0.0186116	-0.0467348	-0.0241223	-0.0391725	0.0147094	0.039317	-0.0180517	0.00903171	0
152.2	0.0257045	-0.0245781	0.00540963	0.0237161	-0.0149946	-0.0277702	-0.0332172	0.0435436	-0.0123117	0.0277694	0
152.4	0.0208861	-0.0142889	0.0699793	0.0622561	0.0298132	0.00879698	-0.0252962	-0.0524315	0.0231569	-0.00169311	0
152.6	-0.0230571	0.0320089	-0.0680036	0.00961433	-0.030287	-0.0364043	-0.00558525	-0.0177122	0.0202982	0.0471593	0
152.8	-0.0137859	0.00345859	0.0150051	-0.032571	-0.00802326	0.0162615	-0.0326869	-0.026136	0.0287124	-0.00678559	0
153	-0.02544	-0.0142644	0.0537282	-0.0474611	-0.0226034	0.0220731	0.015873	0.00175819	0.0123431	0.00134716	0
153.2	-0.0127779	0.000171907	0.0317708	-0.00919994	-0.00978485	-0.0375535	0.0283048	0.0329209	0.0118704	-0.0228426	0
153.4	-0.0121328	0.00466884	0.0133219	0.0297326	0.0231132	-0.0258636	0.00996231	0.00654224	0.00883488	-0.0392024	0
153.6	-0.0320108	0.00745648	-0.0179639	-0.0116672	-0.00403482	0.0213772	0.0227029	-0.0123676	-0.026345	0.015527	0
153.8	0.0202847	0.0237161	-0.0114713	-0.0510903	-0.0220514	-0.0241212	-0.0185485	0.00569058	-0.0195584	-0.0165244	0
154	0.00296542	0.00691119	-0.031479	0.0349287	-0.0312452	-0.0115521	-0.017756	-0.0333618	0.0194903	-0.0112923	0
154.2	0.0207949	0.0236658	-0.0631824	-0.0168521	-0.0391153	0.00452932	0.00815073	0.00505704	-0.0153524	-0.00593929	0
154.4	0.0271988	-0.00281474	-0.0506384	-4.2664e-05	-0.0158401	-0.019195	0.0050898	0.00577806	-0.00565089	-0.0100549	0
154.6	0.0165489	-0.00210161	-0.00590588	0.00582226	0.0442776	-0.00385318	0.000797042	-0.00874827	0.00351587	-0.00544856	0
154.8	0.00422298	0.0155717	0.0308405	-0.0176138	0.0374603	0.0044219	0.00119728	-0.0202368	-0.0312994	-0.00475865	0
155	0.00115518	-0.0257159	0.0385391	0.0423568	-0.0192782	-0.0337322	-0.0197261	-0.019722	-0.031243	-0.0118051	0
155.2	0.0389473	-0.015171	0.00406618	0.0133162	0.042094	0.025003	-0.0250039	0.084616	-0.00781854	-0.00229389	0
155.4	0.0108868	-0.00479657	-0.0377616	0.0348573	0.0226799	0.0321086	-0.0122381	0.0343034	0.00751165	-0.0154632	0
155.6	0.00142891	-0.0190715	0.00698673	0.0438298	0.0574994	-0.00345025	-0.0205446	0.0338369	-0.00816953	-0.00973436	0
155.8	-0.044626	-0.00501311	0.0420156	0.0278682	0.0721541	0.00682914	0.0142736	-0.014112	-0.0336807	0.0250631	0
156	-0.0388551	0.0203186	0.027306	-0.0122036	0.0179567	0.0294488	0.0364391	-0.0324663	-0.0299386	0.0286507	0
156.2	0.0317243	0.0235239	0.0197862	-0.0191644	-0.00871641	0.0155325	0.0020595	0.0228964	0.0436504	0.00235026	0
156.4	0.0017298	0.0220611	0.00532443	0.040476	0.0131569	0.00375216	-0.00596556	0.00275991	0.0927247	0.00827629	0
156.6	-0.0334329	-0.00083688	-0.0393967	0.0149053	0.00229432	0.000220744	-0.00414311	0.0468816	-0.0269649	0.0239726	0
156.8	0.00801723	-0.0390416	0.0231649	-0.0268626	0.00639365	-0.00737137	-0.0165823	0.0172324	0.0484181	0.0437816	0
157	-0.0182628	-0.043827	-0.00385348	0.0070778	-0.0464551	-0.0192111	0.0378762	-0.0462742	-0.0164875	-0.0244691	0
157.2	-0.0377928	-0.0268229	0.00838597	0.0471567	-0.058934	0.0046177	0.0542632	-0.0443173	0.00220551	-0.029348	0
157.4	-0.0132655	-0.00646807	0.0398388	-0.000808445	-0.0161728	0.0120928	-0.0108239	0.00983732	0.0529285	0.0172344	0
157.6	-0.00813767	-0.0085266	-0.0331614	-0.0409705	-0.00728225	-0.0240362	-0.00774564	0.0153249	-0.0438232	-0.0107975	0
157.8	0.0157858	-0.0174282	-0.02435	0.0108086	-0.00908146	-0.00884661	0.0736799	-0.022547	0.0205555	-0.0280838	0
158	0.0383799	0.082272	0.0457169	-0.0728819	-0.0129433	0.0220373	-0.00381875	0.0401922	-0.0106895	-0.0275574	0
158.2	0.00724611	0.0283055	0.006283	-0.0439597	-0.00254278	0.0211614	-0.0154303	0.0165741	-0.00670316	0.00305468	0
158.4	-0.0158563	-0.0285419	0.0404822	0.070713	-0.0195239	0.0194655	-0.00958452	-0.0186698	0.00321896	-0.0376869	0
158.6	0.011292	0.0170017	0.0363291	0.0604888	-0.00791011	0.0204289	-0.0311655	-0.0362548	-0.00890574	-0.0390006	0
158.8	0.0280565	0.0283505	-0.0471713	-0.0518813	0.043484	0.0207446	-0.0130198	-0.0480025	-0.0289177	0.0234325	0
159	0.0151319	-0.0204036	-0.0187827	-0.0678601	0.0382562	0.00964027	0.0260444	-0.0147796	-0.0274186	0.0221983	0
159.2	0.0469031	0.0224114	0.0189459	0.00448904	-0.00171949	-0.0229678	0.00476605	0.0261544	0.0204358	0.0256826	0
159.4	0.0282761	0.0230845	-0.00580522	0.0105725	0.0558192	0.0382705	0.00248607	0.0459881	-0.0467526	0.0384598	0
159.6	-0.010502	-0.00329448	-0.014545	0.0245838	0.0283356	0.00997518	-0.0173055	0.0398211	-0.0263172	0.0440757	0
159.8	0.00538772	-0.000168118	0.0187428	0.0746492	-0.00280904	-0.00727119	0.00840416	-0.0141978	-0.00410261	0.0178074	0
160	-0.000630872	0.0137038	-0.00680015	0.0229417	0.0226175	0.00797208	0.0133959	-0.0319556	0.0245189	-0.0265943	0
160.2	-0.0299995	0.00953668	-0.0395658	-0.0436749	0.00247478	-0.0106067	-0.0130058	0.0371153	0.0663532	-0.0281041	0
160.4	0.00466443	-0.00719151	0.0317417	0.0300823	-0.057146	-0.00151272	0.0258022	0.0626801	0.0112755	0.0156598	0
160.6	-0.0268759	-0.0398159	0.0104715	-0.0445686	-0.0333435	0.00913571	-0.017488	-0.0211566	0.017841	0.00579297	0
160.8	-0.00299352	-0.0246821	0.0141291	-0.018929	-0.047866	-0.0203073	-0.0287789	-0.00366337	-0.0205696	-0.0098467	0
161	-0.0415867	-0.0150992	-0.0477373	0.0015765	-0.0264666	-0.0237279	-0.0136056	-0.0174455	-0.00723819	-0.0486758	0
161.2	-0.0447661	-0.00328881	-0.0140741	0.00967137	-0.00136354	-0.0329478	0.0387238	-0.0372485	0.00239359	-0.0453299	0
161.4	-0.0149361	-0.0251369	0.030037	-0.000504748	0.00711963	-0.0428149	0.0481345	-0.0236939	-0.011943	-0.000880612	0
161.6	-0.0349127	-0.046425	-0.0602308	-0.0297548	0.00450936	-0.0210584	-0.0159566	-0.0163429	0.00132905	0.00485199	0
161.8	-0.010853	0.0305076	-0.0232336	0.0153625	-0.051583	-0.0216067	0.00306762	0.00796876	-0.00897808	-0.00860666	0
162	-0.0480433	-0.0221047	0.0281519	-0.0310986	-0.0155295	-0.00827988	0.0394895	-0.0248051	0.00491388	0.00132206	0
162.2	0.0508178	0.0452159	-0.0132386	-0.00677248	0.0471592	0.00751739	-0.0162876	-0.0134252	-0.0155779	-0.00805243	0
162.4	0.0338358	0.031193	0.0223475	0.00283899	0.0352327	0.0111679	-0.0366992	-0.00765772	-0.0247146	0.0360682	0
162.6	-0.00761899	-0.00438543	0.022265	-0.0142442	0.0235952	0.0462839	-0.0178665	-0.0174776	0.00624142	0.0475563	0
162.8	0.0433927	0.0247871	-0.0255148	0.0202828	0.0281046	0.0606161	-0.0156823	0.00307717	0.0105095	0.00290047	0
163	0.0243266	0.00585378	0.0520761	0.0383087	-0.0267417	-0.00322608	-0.0103178	0.0424747	-0.00513407	-0.000321312	0
163.2	0.0186328	0.0487903	0.0569542	-0.0310718	-0.0405596	-0.0100798	-0.0253517	0.0478969	0.0547561	-0.0198318	0
163.4	0.0145532	-0.00575635	-0.00961261	-0.00957998	0.0192402	0.00412135	-0.0128628	-0.0133314	0.0112887	0.0253693	0
163.6	0.00314922	-0.0509379	-0.0166996	-0.0097164	-0.00426519	-0.00303907	0.00325084	0.0581501	-0.0285953	0.0122383	0
163.8	-0.00785811	-0.037346	-0.0466997	-0.0109892	4.35013e-05	0.000718078	-0.000371204	-0.0174571	0.00375798	-0.0213167	0
164	0.00577158	-0.0184482	-0.0585029	0.00932941	0.0146811	0.00319463	0.00894088	-0.059067	0.00587088	-0.0115142	0
164.2	0.0191329	-0.0195873	-0.0219492	-0.021242	-0.0394113	-0.0209191	0.0182627	0.0650121	-0.0294054	0.0109368	0
164.4	-0.015626	-0.0168613	-0.0451476	-0.0671527	-0.0309735	-0.0230461	-0.0165466	-0.0308578	-0.0110409	0.00281975	0
164.6	-0.0383122	-0.0063917	0.00124293	-0.0077879	0.0233814	0.0120858	-0.0119692	-0.027913	-0.0370181	-0.0324619	0
164.8	-0.0247052	-0.0102074	-0.0206638	-0.0287488	-0.0257309	-0.0117293	0.0152132	0.012626	0.0229354	0.0244639	0
165	-0.0135251	-0.0123087	-0.0178568	0.00109871	-0.00198806	-0.0358272	0.00692138	-0.023594	0.0433841	0.011567	0
165.2	-0.0225509	0.0156063	0.0131689	0.00403308	0.0305836	-0.0670929	0.0192682	0.00264576	0.0227921	-0.0459846	0
165.4	-0.00776998	0.028688	0.0404067	0.0320007	0.0147426	-0.041996	0.0301388	0.024238	0.00898191	-0.0176076	0
165.6	0.0138741	-0.00402319	0.0688296	0.0932855	0.027104	0.0447725	-0.00765069	-0.0408204	-0.00491328	0.042325	0
165.8	-0.0287972	-0.0062025	0.0489872	-0.0629765	0.0111834	0.0272363	-0.00432219	0.0350443	0.0159316	0.0176214	0
166	-0.0095219	0.0216514	0.0343253	0.0191698	-0.00149594	0.0660609	-0.00983913	0.0224806	0.0149363	-0.00476993	0
166.2	0.0248116	0.0135362	0.0796464	-0.00627408	-0.0315716	0.0251307	-0.0101643	-0.00615191	-0.012418	0.00675919	0
166.4	0.0445057	0.0422748	0.0067684	0.0250954	-0.00216942	0.00694657	-0.0219806	-0.0435739	-0.0208111	0.0237351	0
166.6	0.0172839	0.0392816	-0.0916579	0.0920799	-0.000979235	0.0135123	-0.0148158	-0.0590891	-0.000613011	0.00724635	0
166.8	-0.0142204	-0.0194796	-0.0446334	0.0428783	-0.037904	-0.0100461	0.00516825	0.00434836	-0.00454052	-0.0324909	0
167	0.0197848	-0.0101468	0.0139649	-0.011271	0.00216096	-0.0132561	-0.0177288	0.0681087	-0.03892	-0.0401208	0
167.2	0.0315725	0.01458	-0.0391659	-0.0567895	-0.00262543	-0.0197346	-0.0225489	0.0156238	-0.0176396	-0.0044467	0
167.4	-0.000864239	0.00462977	-0.00684356	-0.0288495	-0.00507438	0.0139692	0.0384578	-0.0171714	0.00353368	0.00628357	0
167.6	-0.0222925	0.0126444	-0.00876829	-0.0352256	0.01854	-0.00512911	0.0196709	-0.0851434	-0.0206801	-0.00271353	0
167.8	-0.0209569	0.0194452	-0.0153494	-0.0227535	0.0276383	-0.0299945	-0.0238087	0.00674806	0.0363424	-0.0093904	0
168	-0.0112017	-0.0139115	0.0085011	0.000546503	0.0221011	-0.0141575	-0.00339178	0.0899339	0.0287758	-0.00123055	0
168.2	-0.0035854	-0.0443846	-0.00154295	-0.000537663	0.0159865	0.00203991	0.0404523	0.0151696	-0.0655636	0.0260272	0
168.4	-0.00544978	-0.0131148	-0.00954715	0.0319125	-0.0121602	-0.00417954	0.0518846	0.0578013	0.0100472	0.0378837	0
168.6	-0.00792432	0.0184633	0.0455081	-0.0114037	-0.0313147	-0.026981	0.0162212	-0.00953182	-0.0530134	-0.0148107	0
168.8	-0.0144966	-0.0262602	-0.028042	-0.0499424	-0.0145339	-0.00865245	-0.0625605	-0.0406231	-0.00612168	-0.0207919	0
169	0.028462	-0.0289312	-0.034436	-0.000110435	0.0220149	-0.00947417	0.00746327	0.0144015	0.0355886	-0.0191102	0
169.2	-0.00954323	-0.00803128	0.00767899	0.0119499	0.0346216	-0.00537766	0.0283837	0.0120053	0.0171369	-0.0100422	0
169.4	-0.0630015	-0.00470747	-0.000794885	0.00132054	-0.00160327	0.0199912	-0.0532422	-0.0100464	0.0175855	0.0151946	0
169.6	0.0129794	0.00478027	-0.00683067	0.0244426	-0.0333522	0.0335744	-0.0153078	0.0275268	0.0170416	0.0244626	0
169.8	0.0219671	-0.0112293	-0.0163362	-0.0570092	-0.00235781	0.0451757	0.0205888	-0.0229751	-0.0135725	0.0171328	0
170	0.0207943	0.00895579	-0.00947979	0.0219722	-0.0188158	-0.012347	-0.0456568	-0.0135872	0.0178312	-0.0269567	0
170.2	0.00875435	-0.0052257	-0.00161673	0.0690801	-0.02352	-0.014138	-0.0407166	-0.0453499	0.00021031	0.0025284	0
170.4	-0.00909996	-0.0216699	-0.00537248	0.0318564	0.0152063	0.0191469	0.0168331	-0.0105394	-0.0066372	0.0326595	0
170.6	0.00490308	0.0183101	0.0381051	0.00962639	0.0275851	0.0310326	0.00904931	-0.0149199	0.0123174	0.0160599	0
170.8	0.0338855	0.0639232	0.0523075	0.0136179	-0.00570594	0.00147747	-0.011354	-0.0683183	-0.000859537	-0.0213678	0
171	0.0241752	0.0353173	-0.0267742	-0.0061698	-0.0227345	-0.0458054	0.0379749	0.00410645	-0.0244375	-0.0607132	0
171.2	0.00678156	-0.0173068	0.0299219	-0.0244293	-0.0232901	-0.0272118	0.0171473	-0.0307308	-0.0216744	-0.038299	0
171.4	0.0060466	-0.0170949	-0.0285414	-0.062558	0.00530521	-0.0373869	-0.0214862	0.0097848	0.00743064	0.0248054	0
171.6	0.00193249	0.0104541	-0.0543477	-0.0529768	-0.0113418	-0.0131429	-0.0242143	0.0541413	-0.0126811	0.0709665	0
171.8	0.00931729	0.00124756	-0.0334377	-0.00579956	-0.0338549	0.0356838	-0.0157539	0.0549036	0.0209016	0.0353157	0
172	-0.007562	-0.0103559	0.0055787	-0.0179351	-0.0107259	0.0196006	0.00928159	0.0151553	0.0427086	-0.0161969	0
172.2	-0.0466155	0.0191639	0.0307306	-0.0408285	0.0250372	-0.0396065	0.011076	-0.00793148	-0.0228183	-0.0136703	0
172.4	-0.0252085	0.012197	-0.0386731	0.028881	0.0198976	-0.0360073	-0.0589742	0.0387131	-0.0122071	-0.0283845	0
172.6	-0.0228812	-0.0661421	0.000367151	-0.0138198	-0.0278404	-0.0163654	-0.00216177	-0.0123346	-0.0262793	-0.038045	0
172.8	-0.0133517	-0.0834844	0.0646509	0.012574	0.0251407	-0.00048429	0.0364969	-0.000317411	0.00358488	0.0344271	0
173	-0.000905483	-0.0043451	0.0628473	-0.0260673	0.0143806	0.0104894	0.0195303	-0.0665238	0.0123895	0.0254083	0
173.2	0.0050874	0.0543858	0.0174131	-0.00335228	-0.00721127	0.0318722	0.00574791	-0.0298102	-0.0253817	-0.00762282	0
173.4	-0.0124935	0.0282531	-0.0342535	0.0916204	0.0143361	0.0147522	0.01205	0.0444051	-0.0156167	0.0101038	0
173.6	-0.0187745	-0.00616615	-0.057956	0.0434943	-0.0044221	-0.037734	0.0161844	-0.043959	0.0444723	-0.0162749	0
173.8	0.0508774	0.00651613	-0.00463237	0.0142389	0.02104	0.000527671	0.0181144	0.077433	0.0296728	-0.0362467	0
174	0.0265752	0.0104828	0.0323628	0.0183751	-0.0123307	0.00543923	0.0184966	0.0287009	0.0332838	0.0322728	0
174.2	0.00566212	0.00862762	0.0324048	-0.0385662	-0.0474392	0.0441169	-0.0169201	-0.0126873	-0.00711727	0.0161683	0
174.4	0.00935486	0.00114089	0.0225451	-0.0110921	0.00119758	0.0319518	-0.0113149	-0.0233517	0.0296257	-0.0060221	0
174.6	0.017801	0.0326919	-0.0149204	0.0364649	0.0399143	-0.0160418	0.0095554	0.0251354	0.0499537	0.0147368	0
174.8	0.0263719	0.0378039	-0.0255492	-0.0217996	0.021144	-0.0200515	-0.0284501	0.0530701	-0.0471756	-0.0117897	0
175	0.0175912	-0.0484054	0.0349324	-0.0475378	0.0408348	-0.0102864	-0.0483803	-0.0554222	-0.0753735	-0.0448171	0
175.2	-0.000146969	0.00183717	-0.0178548	-0.0017566	0.0333818	0.0265052	0.0207846	0.0291852	-0.0221277	0.026372	0
175.4	-0.0497705	0.0181017	-0.0433973	0.0232488	0.00417833	0.00652216	0.0218356	-0.00134787	0.023692	-0.0150299	0
175.6	0.00646912	0.0147283	0.0411755	0.02405	0.0225456	0.0313135	0.0203901	-0.0297585	0.00461217	0.0125204	0
175.8	0.0351935	-0.00150954	0.0508266	0.0234294	-0.00144945	0.0234884	0.0381229	-0.0168712	0.000998906	0.000717752	0
176	-0.00838653	-0.0065836	-0.0413508	0.0030785	-0.0153988	-0.0255745	0.0144862	-0.00550709	0.00814541	-0.0333304	0
176.2	-0.00881879	0.00877269	-0.0403673	-0.0171115	0.0226979	-0.0127618	-0.0293763	0.00341539	0.00481184	0.0363159	0
176.4	-0.0121808	-0.0303036	0.0396892	0.0199578	-0.0386659	0.00573686	-0.0171765	-0.0186268	0.0699008	0.014912	0
176.6	0.00302712	-0.0333522	-0.00665944	0.0301723	0.0183155	0.00729986	0.00516561	0.007301	0.0582169	0.00771108	0
176.8	-0.0107983	0.0234507	-0.0334405	0.0115199	0.00112012	-0.00866608	0.0200198	-0.0353341	0.0212177	-0.0113904	0
177	0.0282242	0.0277423	0.0208617	0.012961	0.000120252	0.0088493	0.0063452	-0.00127818	0.0229987	-0.0117157	0
177.2	0.0497879	0.00280318	0.0728839	-0.0415721	0.0161895	0.027412	-0.0223249	0.0330257	0.00671669	0.0032712	0
177.4	0.000164223	-0.0155071	0.0276621	-0.0249775	0.0053108	0.00818345	-0.0155063	-0.0282401	-0.0514851	0.00741342	0
177.6	-0.0116261	-0.0264809	-0.0415175	0.107862	0.0245494	-0.00223784	0.00260148	-0.0214552	-0.0722613	0.0237191	0
177.8	0.0161766	0.0472553	0.0282263	-0.0461683	0.0114897	0.0178313	-0.0421828	0.067237	-0.0391729	0.0446337	0
178	0.0147277	0.00809504	0.0093066	-0.0310851	-0.00399504	0.0145052	0.00881674	0.0377294	-0.0182539	-0.00715873	0
178.2	-0.0268907	0.00538892	-0.0422133	0.0684978	-0.0262152	0.0147663	0.0535905	-0.00218683	0.000421213	-0.0151042	0
178.4	-0.0282717	-0.0175074	-0.0296473	0.0173552	-0.0269221	-0.0115135	0.0153903	0.0105612	-0.0205087	-0.0275446	0
178.6	-0.00608916	-0.0468776	0.00365527	-0.0653044	-0.0242479	-0.0287376	-0.0216467	0.0246103	-0.0302999	-0.0261108	0
[truncated: 357 more rows]

## Sheet: SEM
Time	gamma-5	gamma-4	gamma-3	gamma-2	alpha	stimulus
[truncated: 101 more rows]

[truncated: 2 more sheets: Average_left_right _combined, single trial with speed]
