# Supplementary material for: Multiphoton imaging of neural structure and activity in Drosophila through the intact cuticle
Source: eLife. 2022 Jan 24;11:e69094. doi: 10.7554/eLife.69094 (PMC8846588; doi:10.7554/eLife.69094)
Supplement: Figure 6—source data 2. [file elife-69094-fig6-data2.xlsx]

## Sheet: fly1
	time	stimulus	x	y	Vx	Vy	Vz	Sx	Sy	Sz				Vx	Vy	Vz	Sx	Sy	Sz
0	0	0	0	0	-0.412956	-6.44503	110.161	0.412956	6.44503	110.161		Stim1	Before	-0.0253343	-0.0237849	-0.102518	0.112466	0.218563	1.56539
1	0.2	0	-0.282308	-0.171455	0.571311	3.63118	-24.8359	0.571311	3.63118	24.8359			After	-0.331698	-0.0553899	7.60637	0.657552	2.31743	44.9858
2	0.4	0	-0.444247	0.098416	1.67005	-0.867077	63.8452	1.67005	0.867077	63.8452
3	0.6	0	-0.314249	0.203069	-0.402521	-1.42752	59.0924	0.580529	1.42752	59.0924		Stim2	Before	-0.140545	0.337498	-1.80252	0.520342	1.08285	14.1346
4	0.8	0	-0.109761	0.188505	-0.429479	-0.587138	26.0675	0.429479	0.587138	26.0675			After	-0.814884	1.89217	-2.07783	2.02011	3.71744	65.5852
5	1	0	0.191388	0.120664	-0.708721	-1.94016	31.8961	0.708721	1.94016	31.8961
6	1.2	0	0.707376	0.277468	0.243144	-2.35963	46.6861	0.951167	2.35963	46.6861		Stim3	Before	-0.00685461	-0.00144003	-0.00834919	0.154311	0.275089	2.71013
7	1.4	0	1.2585	0.155618	-0.0955116	-1.47531	2.34714	1.58146	3.94653	70.1179			After	-0.92739	-3.06608	77.5055	2.24069	4.69126	96.2209
8	1.6	0	1.12771	0.30663	0.26754	-0.341575	-7.66852	0.647436	1.06622	15.8885
9	1.8	0	1.28706	0.308424	0.0468119	-0.434307	14.0573	0.0678256	0.434307	14.0573		Average	Before	-0.0575778	0.104091	-0.637796	0.262373	0.525501	6.13672
10	2	0	1.36941	0.283412	-0.116192	-0.410262	1.05518	0.160745	0.410262	1.05518			After	-0.691324	-0.409766	27.678	1.63945	3.57538	68.9306
11	2.2	0	1.2989	0.325708	0.313211	0.701432	-2.41722	0.313211	0.701432	3.06325
12	2.4	0	1.40898	0.324738	-0.104998	-1.0198	-4.50096	0.226145	1.0198	4.50096
13	2.6	0	1.36576	0.332073	0.054329	0.445378	2.14155	0.103984	0.445378	2.14155
14	2.8	0	1.3479	0.358336	0.0431708	-0.123652	1.58028	0.246169	0.286629	5.77661
15	3	0	1.39962	0.355725	0.0893183	-0.171651	0.191262	0.147942	0.171651	2.73367
16	3.2	0	1.41336	0.385445	0.0854423	-0.0413672	1.96246	0.0854423	0.0881505	1.96246
17	3.4	0	1.44034	0.360503	-0.0670679	-0.247401	-0.676951	0.305822	0.247401	1.97126
18	3.6	0	1.48173	0.365551	-0.0493413	-0.136949	0.678152	0.0493413	0.136949	0.678152
19	3.8	0	1.49122	0.371745	0.00762563	0.0741932	0.785794	0.131739	0.262641	0.785794
20	4	0	1.47533	0.401842	0.14753	-0.135566	-0.703585	0.281753	0.370801	0.703585
21	4.2	0	1.50009	0.39027	-0.0778805	-0.0340985	-1.295	0.127807	0.125552	1.295
22	4.4	0	1.51406	0.390817	0.0673531	0.0168434	1.22203	0.0673531	0.166798	1.22203
23	4.6	0	1.49152	0.417978	0.0825895	-0.0239738	-0.741022	0.238332	0.320217	0.90932
24	4.8	0	1.48108	0.405631	-0.00474932	0.294203	-1.43608	0.067163	0.326093	1.90173
25	5	0	1.4134	0.386188	-0.202465	0.364504	-2.66771	0.202465	0.364504	2.66771
26	5.2	0	1.41025	0.419238	0.0447507	-0.111406	1.71694	0.521721	0.372697	1.71694
27	5.4	0	1.46397	0.40271	0.0204703	-0.162255	-0.525318	0.0572733	0.162255	0.87831
28	5.6	0	1.44627	0.41678	0.0791863	0.347661	0.623564	0.0856274	0.618315	3.18055
29	5.8	0	1.45155	0.424367	0.100468	-0.340564	-2.61384	0.157992	0.340564	3.97253
30	6	0	1.46157	0.411177	-0.119394	0.0408684	1.77415	0.169099	0.0408684	1.96192
31	6.2	0	1.45874	0.412409	-0.00736547	-0.00306217	-0.193639	0.00736547	0.00328357	0.193639
32	6.4	0	1.46607	0.416704	0.0062423	-0.0444766	-0.195409	0.0671223	0.0444766	0.195409
33	6.6	0	1.46754	0.409967	-0.0247711	0.00130423	0.278533	0.0247711	0.00177891	0.278533
34	6.8	0	1.46312	0.411579	0.0194174	0.028353	0.239432	0.0194174	0.028353	0.239432
35	7	0	1.51523	0.422057	-0.0111519	-0.275408	1.41683	0.191988	0.275408	1.41683
36	7.2	0	1.4901	0.41123	-0.0433202	0.0955016	-4.24723	0.131084	0.256091	4.85255
37	7.4	0	1.51504	0.418942	0.137122	-0.067057	3.40898	0.137122	0.136867	4.21041
38	7.6	0	1.49477	0.449612	0.0160607	0.121688	0.537361	0.327103	0.121688	1.59212
39	7.8	0	1.48094	0.416252	-0.043734	-0.0213893	0.0327125	0.208696	0.180464	2.47611
40	8	0	1.50141	0.421427	-0.0531638	-0.0223565	-2.04114	0.0852339	0.137824	2.04114
41	8.2	0	1.49142	0.434572	0.0768881	0.0198431	2.04202	0.173628	0.0198431	2.04202
42	8.4	0	1.49141	0.431591	0.0556659	-0.00231634	-0.761031	0.129108	0.00231634	0.761031
43	8.6	0	1.53408	0.426124	-0.050609	-0.0818467	0.288649	0.166486	0.588989	0.288649
44	8.8	0	1.47978	0.441905	0.131818	0.126054	-0.802412	0.166132	0.176346	3.43384
45	9	0	1.49295	0.44275	-0.0721916	-0.052949	0.484889	0.0729897	0.052949	0.649333
46	9.2	0	1.49455	0.441367	-0.00968871	-0.0100658	-0.0260322	0.00968871	0.0100658	0.0260322
47	9.4	0	1.53137	0.429719	-0.116117	-0.350013	0.520545	0.116117	0.350013	0.546577
48	9.6	0	1.48727	0.425706	-0.0460096	0.415885	-1.63621	0.307607	0.415885	1.63621
49	9.8	0	1.5402	0.448679	0.0827595	-0.399585	1.5037	0.527281	0.399585	2.02717
50	10	0	1.58173	0.417286	-0.0592965	-0.0961088	0.266711	0.0592965	0.0961088	0.472573
51	10.2	0	1.47371	0.432612	0.195706	0.643057	2.30042	0.195706	0.643057	2.30042
52	10.4	0	1.7024	0.547556	0.560808	-1.46967	6.67208	0.560808	1.46967	6.67208
53	10.6	0	1.56617	0.613578	0.197014	1.1607	10.4178	0.220002	1.1607	10.4178
54	10.8	0	1.47017	0.652419	0.18464	0.644974	-6.92605	0.186013	1.04098	6.92605
55	11	0	1.29508	0.660139	0.0859339	0.577173	0.69729	0.172822	0.577173	2.27096
56	11.2	0	1.42215	0.753917	0.305858	-1.13062	30.1713	0.860996	1.13062	30.1713
57	11.4	0	1.60701	0.698982	-0.0451453	-0.246611	19.0662	0.0544633	1.49408	21.2457
58	11.6	0	1.30344	0.769201	0.158421	1.69214	-30.1909	0.158421	1.69214	30.1909
59	11.8	0	1.24324	0.757327	-0.19701	-0.378336	5.04741	0.19701	0.417461	5.04741
60	12	0	1.28819	0.744307	0.0260325	-0.124291	-1.24638	0.139827	0.263207	4.37503
61	12.2	0	1.34133	0.736679	0.0383028	-0.357264	1.71224	0.0428136	0.399633	1.71224
62	12.4	0	1.35011	0.71914	0.00179687	0.274583	1.99661	0.41908	0.276013	2.83047
63	12.6	0	1.34352	0.747042	0.0344333	-0.0818027	-1.8428	0.0344333	0.114332	1.8428
64	12.8	0	1.35811	0.726389	-0.130038	-0.125905	1.39811	0.130038	0.125905	1.39811
65	13	0	1.37864	0.707013	-0.108547	-0.151996	0.0757011	0.108547	0.151996	0.0757011
66	13.2	0	1.36102	0.713874	0.0272327	0.0988278	0.140109	0.0272327	0.0988278	0.140109
67	13.4	0	1.32	0.734282	0.0901521	0.216414	-0.596794	0.0901521	0.216414	0.739034
68	13.6	0	1.34214	0.723027	-0.100849	-0.224925	0.44979	0.100849	0.224925	0.638777
69	13.8	0	1.36372	0.715751	0.0210947	-0.0222724	-0.0671687	0.0210947	0.0222724	0.0671687
70	14	0	1.36318	0.723108	0.0363016	0.0199493	-0.75092	0.0363016	0.0199493	0.75092
71	14.2	0	1.37422	0.732134	0.059878	-0.0796905	-0.482516	0.059878	0.0796905	0.482516
72	14.4	0	1.35282	0.722857	-0.0338634	0.280461	0.543561	0.179463	0.333033	1.33493
73	14.6	0	1.34034	0.723974	-0.0554431	-0.185757	2.74446	0.0554431	0.19096	2.74446
74	14.8	0	1.35365	0.722377	-0.00569948	0.0195298	-0.0839208	0.0877685	0.0536052	0.536103
75	15	0	1.32895	0.739513	0.131677	0.262609	-0.722431	0.131677	0.262609	0.722431
76	15.2	0	1.33068	0.720973	-0.206453	-0.248602	0.0214243	0.206453	0.248602	0.0799254
77	15.4	0	1.37194	0.695584	-0.0179004	-0.148058	-0.613245	0.0392705	0.148058	0.613245
78	15.6	0	1.36739	0.708107	0.0470043	0.0927405	-0.255878	0.0735658	0.0927405	0.281197
79	15.8	0	1.36166	0.702584	-0.0533681	0.0335445	0.974542	0.0654051	0.103196	0.974542
80	16	0	1.33572	0.732645	0.149467	0.163749	-1.89351	0.202059	0.163749	2.31126
81	16.2	0	1.36902	0.691269	-0.174422	-0.395801	-0.309412	0.174422	0.395801	1.04244
82	16.4	0	1.32981	0.711047	0.135216	0.482023	3.34381	0.135216	0.482023	3.34381
83	16.6	0	1.36749	0.696669	-0.147369	-0.288885	-1.02879	0.147369	0.39053	3.79592
84	16.8	0	1.36349	0.67568	-0.0513798	-0.00427424	0.978124	0.111998	0.0582075	1.06657
85	17	0	1.32337	0.718489	0.235467	0.118715	-0.412545	0.235467	0.474931	3.00718
86	17.2	0	1.35016	0.696774	-0.200415	-0.0382754	2.28347	0.200415	0.107433	2.28347
87	17.4	0	1.33616	0.695574	0.0200477	0.00955097	-5.78141	0.0625398	0.17423	5.78141
88	17.6	0	1.36041	0.685498	-0.0275409	-0.120425	3.08154	0.0275409	0.120425	3.22375
89	17.8	0	1.38413	0.698737	0.0527759	-0.0706448	2.17308	0.163173	0.0738872	2.17308
90	18	0	1.31668	0.696159	-0.0585017	0.477714	-1.81871	0.0737045	0.477714	1.81871
91	18.2	0	1.36757	0.658475	-0.167251	-0.777121	1.31972	0.167251	0.777121	4.60014
92	18.4	0	1.55315	0.533946	-0.5842	-0.802553	15.6821	0.5842	0.802553	15.6821
93	18.6	0	1.819	0.375092	-0.501801	-1.57644	30.8239	0.501801	1.57644	30.8239
94	18.8	0	1.85828	0.235111	-0.592703	0.0455124	15.4611	0.592703	0.555809	15.4611
95	19	0	1.51116	0.0365018	-1.32523	0.748041	-3.31693	1.40247	2.37059	10.793
96	19.2	0	1.84647	-0.0229426	0.121183	-1.48083	27.7095	0.774449	1.48083	27.7095
97	19.4	0	1.91539	-0.232815	-0.702674	-0.623827	20.0239	0.702674	0.623827	20.0239
98	19.6	0	2.04536	-0.31602	0.158852	-1.22039	4.63262	0.347665	1.22039	5.51082
99	19.8	0	2.024	-0.226899	0.426794	1.07835	-14.6782	0.426794	1.07835	14.6782
100	20	0	1.99774	0.0125948	0.974892	0.466855	-23.8019	0.974892	0.466855	23.8019
101	20.2	0	1.93457	0.123859	0.252976	0.50675	-6.42653	0.252976	0.50675	6.42653
102	20.4	0	1.95405	0.068763	-0.351952	-0.399346	7.10572	0.351952	0.399346	7.10572
103	20.6	0	2.02005	0.0337994	-0.000511522	-0.359883	8.30994	0.296262	0.359883	8.30994
104	20.8	0	2.07848	-0.0254327	-0.0834829	-0.327778	5.3948	0.0834829	0.327778	5.3948
105	21	0	2.06233	-0.038483	-0.0125691	0.0816701	1.91961	0.308341	0.194035	1.91961
106	21.2	0	2.05842	-0.0567778	-0.327927	0.0161434	-4.88749	0.327927	0.0161434	4.88749
107	21.4	0	1.97758	0.0383873	0.355742	0.955276	-8.53346	0.355742	0.955276	8.53346
108	21.6	0	2.03161	-0.0198033	-0.335298	-0.926999	7.81323	0.335298	0.926999	7.81323
109	21.8	0	2.06899	-0.0470625	0.0161567	-0.22443	1.69092	0.117093	0.459343	4.16509
110	22	0	2.08444	-0.0614031	0.00360286	0.0539603	-0.271472	0.0385492	0.126109	1.09438
111	22.2	0	2.09548	-0.0598294	0.038985	-0.0176565	-3.65847	0.040049	0.0608373	3.65847
112	22.4	0	2.07137	-0.0227534	0.12506	0.12442	-3.06911	0.12506	0.313823	3.06911
113	22.6	0	2.10466	-0.220129	-1.40203	-1.02232	-0.0765088	1.40203	1.12157	2.89646
114	22.8	0	2.15716	-0.418961	-0.0817029	-0.154289	-1.81548	0.778873	0.154289	4.30311
115	23	0	2.16875	-0.378962	-0.017374	-0.0425961	-0.281926	0.173854	0.486498	2.42646
116	23.2	0	2.50689	-0.711176	-0.269288	-2.95107	109.428	1.5759	2.95107	109.428
117	23.4	0	2.86232	-1.32886	-1.33225	-3.25585	80.4766	1.33225	3.25585	80.4766
118	23.6	0	2.81838	-1.25766	0.536233	1.41469	-1.82964	0.692189	1.41469	24.4223
119	23.8	0	2.79194	-0.703057	1.47923	2.8199	-43.55	1.47923	2.8199	43.55
120	24	0	2.77578	-0.446907	0.322001	0.242912	-18.8856	0.322001	0.242912	18.8856
121	24.2	0	2.76035	-0.394099	0.047706	0.12588	4.40249	0.0733877	0.39854	4.40249
122	24.4	0	2.80681	-0.432396	0.0290813	-0.196083	21.1293	0.0290813	0.30987	21.1293
123	24.6	0	2.89248	-0.677061	-0.190675	-1.13144	57.6133	0.608394	1.68168	57.6133
124	24.8	0	2.85901	-0.697455	-0.32009	-0.0614994	-7.78899	0.32009	0.449109	7.78899
125	25	0	2.76326	-0.547631	-0.133578	1.17131	-6.13877	0.163495	1.17131	6.13877
126	25.2	0	2.52394	-0.369195	-0.496947	1.39788	3.8498	0.784631	1.39788	3.8498
127	25.4	0	2.04091	0.0195043	-1.73651	2.3256	47.6038	1.73651	2.3256	47.6038
128	25.6	0	1.92599	0.191932	0.110876	1.13882	25.7251	0.243379	1.13882	25.7251
129	25.8	0	1.83994	0.522639	-0.333822	1.28809	26.1581	0.333822	2.05092	26.1581
130	26	0	1.65346	0.338821	-1.28823	-0.991506	41.7035	1.28823	0.991506	41.7035
131	26.2	0	1.38495	-0.222281	-0.172407	-2.67438	125.365	1.08944	2.67438	125.365
132	26.4	0	1.57355	-0.141509	0.626383	0.394784	119.035	0.626383	2.63906	119.035
133	26.6	0	0.815711	-0.560277	-0.596793	-5.43331	86.8396	0.596793	5.43331	86.8396
134	26.8	0	-0.511361	-0.832926	-0.241218	-7.35842	144.106	0.241218	7.35842	144.106
135	27	0	-1.63851	-0.668417	0.184527	-4.52115	63.7213	0.345106	4.52115	63.7213
136	27.2	0	-2.82181	-0.368439	1.43568	-5.17058	103.37	1.43568	5.17058	103.37
137	27.4	0	-3.28252	-0.0967317	0.716226	-3.16764	60.2158	0.716226	3.16764	60.2158
138	27.6	0	-3.85714	0.120541	1.63136	-2.01467	42.0009	1.63136	2.01467	42.0009
139	27.8	0	-4.42967	1.01674	0.885275	-6.69061	136.845	1.69896	6.69061	136.845
140	28	0	-4.22357	1.75239	-1.44061	-2.27245	48.6634	1.44061	2.27245	48.6634
141	28.2	0	-4.1026	1.98652	1.19674	-0.647428	74.3289	3.35786	0.647428	74.3289
142	28.4	0	-4.10021	2.81002	2.10314	-6.83306	143.919	2.10314	6.83306	143.919
143	28.6	0	-3.98958	3.48875	1.83623	1.42561	-19.785	1.83623	1.97717	19.785
144	28.8	0	-4.68456	2.89726	0.210815	6.46167	-125.413	0.473473	6.46167	125.413
145	29	0	-5.12735	2.22109	0.261391	1.52979	-17.4647	0.261391	1.52979	17.4647
146	29.2	0	-4.88324	2.37922	-1.59515	-2.86204	50.6245	1.59515	2.86204	50.6245
147	29.4	0	-4.49122	2.57603	-1.77415	-2.84725	58.5452	1.77415	2.84725	58.5452
148	29.6	0	-4.0475	2.76507	-0.602401	-1.12779	30.8766	0.602401	1.12779	30.8766
149	29.8	0	-4.20386	2.70036	0.477238	0.868407	-21.8635	0.477238	0.868407	21.8635
150	30	0	-4.27847	2.66856	0.152686	0.267117	-9.27851	0.152686	0.365907	9.27851
151	30.2	0	-4.31258	2.65997	0.0602536	0.260706	-1.86666	0.163848	0.260706	2.41596
152	30.4	0	-4.25039	2.68012	-0.151863	-0.316292	5.77083	0.15818	0.517788	5.77083
153	30.6	0	-4.23962	2.66641	-0.0361661	-0.0988076	-2.02783	0.234263	0.171543	2.02783
154	30.8	0	-4.26267	2.68679	0.135189	0.117337	-2.65585	0.135189	0.117337	2.65585
155	31	0	-4.27852	2.66151	-0.0627872	0.0414846	0.142918	0.0627872	0.231578	2.63555
156	31.2	0	-4.28175	2.66847	0.0594736	0.0784755	-0.507622	0.0594736	0.114196	1.00053
157	31.4	0	-4.28072	2.66242	-0.030259	-0.0212813	-0.238005	0.0417594	0.0473005	0.322276
158	31.6	0	-4.28588	2.66311	0.0115408	0.0329669	0.0236133	0.0427011	0.0730258	1.18352
159	31.8	0	-4.29237	2.65856	0.0186445	-0.00161888	-0.287907	0.0211682	0.048386	0.287907
160	32	0	-4.29209	2.66203	0.0160799	-0.00302674	-0.0154335	0.0160799	0.00302674	0.114567
161	32.2	0	-4.28892	2.65675	-0.0371562	0.0147073	0.209448	0.0371562	0.0147073	0.209448
162	32.4	0	-4.29303	2.65308	0.0081438	0.0324032	-0.176589	0.0081438	0.0324032	0.176589
163	32.6	0	-4.29027	2.65586	0.00325824	-0.00220084	-0.198667	0.0211142	0.103007	0.198667
164	32.8	0	-4.29194	2.66091	0.0198995	-0.0411869	0.00102821	0.0198995	0.0411869	0.355547
165	33	0	-4.2903	2.66062	-0.0146408	-0.00345763	0.141872	0.0146408	0.00345763	0.141872
166	33.2	0	-4.28548	2.66123	-0.108549	-0.118672	-1.90306	0.269316	0.293309	1.90306
167	33.4	0	-4.27914	2.65363	0.0548499	0.114346	-0.838646	0.0548499	0.114346	0.838646
168	33.6	0	-4.27631	2.65371	-0.0220129	0.00955813	0.0405342	0.0220129	0.0668284	0.308931
169	33.8	0	-4.28107	2.65303	0.0240084	-0.0182055	-0.168279	0.0240084	0.0459214	0.168279
170	34	0	-4.30589	2.64491	0.0156707	0.199749	-0.624195	0.230786	0.199749	2.12275
171	34.2	0	-4.28277	2.66297	0.00626268	-0.221079	0.45611	0.0491332	0.221079	0.609104
172	34.4	0	-4.30576	2.66966	0.0833748	0.0907488	-1.01905	0.235268	0.0907488	3.10054
173	34.6	0	-4.30162	2.6693	0.0251567	-0.0706147	0.012539	0.0251567	0.0706147	0.0784069
174	34.8	0	-4.29282	2.67009	-0.021261	0.00278688	-0.0155065	0.0834774	0.0673739	0.56398
175	35	0	-4.304	2.66419	0.0151503	0.052095	0.0341687	0.0151503	0.052095	0.0341687
176	35.2	0	-4.30181	2.66686	-0.00613865	-0.0385857	-0.00840884	0.00613865	0.0385857	0.00840884
177	35.4	0	-4.32283	2.67029	0.12358	0.0745046	-1.52179	0.12358	0.0745046	1.52179
178	35.6	0	-4.32934	2.65288	-0.0646389	0.0248845	0.544797	0.0646389	0.208952	0.544797
179	35.8	0	-4.31485	2.68449	0.0830253	-0.122006	-0.627332	0.0830253	0.122006	0.627332
180	36	0	-4.30276	2.64508	-0.183953	0.136702	-1.60808	0.251884	0.136702	1.60808
181	36.2	0	-4.31879	2.6418	0.0564498	0.0612126	-1.66894	0.0564498	0.0612126	1.66894
182	36.4	0	-4.30243	2.65584	-0.0740026	-0.148262	-0.816755	0.0740026	0.148262	0.816755
183	36.6	0	-4.29453	2.64702	-0.0143891	0.0609896	1.42977	0.0652346	0.0609896	1.42977
184	36.8	0	-4.30356	2.65357	-0.00394361	-0.039212	-0.183509	0.181173	0.039212	0.405003
185	37	0	-4.30497	2.64935	0.0745049	0.0223325	0.358518	0.0745049	0.090628	0.358518
186	37.2	0	-4.31238	2.65572	0.0264205	0.0266144	-0.148763	0.0264205	0.0266144	0.148763
187	37.4	0	-4.31127	2.65626	-0.0320221	-0.0696279	-0.827571	0.0842494	0.187462	0.827571
188	37.6	0	-4.31258	2.63794	-0.0405244	0.18719	0.812315	0.0447619	0.18719	0.986938
189	37.8	0	-4.31566	2.63289	0.0343954	-0.0601703	-0.698353	0.0343954	0.112589	0.698353
190	38	0	-4.30849	2.65569	-0.0229158	-0.040206	0.462707	0.156985	0.154127	0.555974
191	38.2	0	-4.31462	2.64124	0.0440377	-0.036345	-0.604229	0.0440377	0.297034	0.604229
192	38.4	0	-4.30675	2.65977	0.00402876	-0.0147775	-0.0428831	0.0105406	0.0147775	0.171216
193	38.6	0	-4.30499	2.66061	-0.00393989	-0.00959856	0.0885605	0.00393989	0.00959856	0.0885605
194	38.8	0	-4.30438	2.65506	-0.0298717	0.0164131	0.460897	0.0298717	0.0418854	0.460897
195	39	0	-4.30473	2.66042	0.0305887	-0.0373193	-0.55414	0.0305887	0.0559838	0.55414
196	39.2	0	-4.30756	2.65733	0.00286103	0.0406462	-0.0155131	0.00447922	0.0535005	0.141918
197	39.4	0	-4.30745	2.65701	-0.00412542	0.00541552	0.159841	0.00412542	0.00541552	0.159841
198	39.6	0	-4.30701	2.65383	-0.0132965	0.0134596	-0.0973079	0.0132965	0.0134596	0.0973079
199	39.8	0	-4.30896	2.65488	0.0158521	0.00774067	-0.0299144	0.0158521	0.0303386	0.428061
200	40	0	-4.3096	2.65643	-0.00114106	-0.0143146	0.0224859	0.0242785	0.0143146	0.103091
201	40.2	0	-4.30714	2.65502	-0.00473948	-0.000237609	-0.16497	0.0159697	0.00349572	0.266963
202	40.4	0	-4.30456	2.65616	-0.012682	-0.0168346	0.133822	0.012682	0.0168346	0.133822
203	40.6	0	-4.30672	2.65785	0.0113099	0.00217924	0.0135123	0.0318116	0.00740094	0.107737
204	40.8	0	-4.30515	2.65891	0.0111926	-0.0129455	-0.133717	0.0258792	0.0129455	0.235429
205	41	0	-4.30487	2.65968	0.00644183	-0.000541629	0.00658525	0.0519116	0.00791881	0.0390374
206	41.2	0	-4.30683	2.66032	-0.00711001	-0.0218296	-0.0249515	0.00711001	0.0865202	0.046268
207	41.4	0	-4.3108	2.66139	-0.115603	0.00399588	-1.72409	0.431547	0.126764	1.72409
208	41.6	0	-4.31299	2.65883	0.0114816	0.0647615	-0.038119	0.51828	0.0647615	0.0947177
209	41.8	0	-4.33509	2.62815	0.129991	0.179266	1.04841	0.129991	0.179266	1.04841
210	42	0	-4.33473	2.62933	-0.00110341	-0.0194303	0.119966	0.00162643	0.0194303	0.119966
211	42.2	0	-4.33691	2.63674	0.0597609	-0.0317889	-0.724355	0.0597609	0.0317889	0.852345
212	42.4	0	-4.32497	2.64125	-0.149389	-0.0922252	-1.49549	0.189198	0.116638	1.49549
213	42.6	0	-4.30603	2.65588	0.0433708	-0.0335418	0.0666014	0.0714132	0.143419	0.508995
214	42.8	0	-4.31059	2.63534	-0.0322059	0.0617665	-0.107007	0.0373885	0.087513	0.286049
215	43	0	-4.30958	2.63784	0.00236047	-0.0086716	0.369109	0.00236047	0.0086716	0.369109
216	43.2	0	-4.30672	2.6398	0.0112499	-0.0424307	-0.37854	0.0595336	0.0715812	0.37854
217	43.4	0	-4.30669	2.65427	0.003977	-0.0139842	0.0449991	0.0826163	0.07717	0.180012
218	43.6	0	-4.30808	2.63979	-0.0285167	0.0509272	0.142821	0.0285167	0.0509272	0.286138
219	43.8	0	-4.31111	2.63864	0.0270134	0.011939	0.0420636	0.0270134	0.011939	0.0420636
220	44	0	-4.30804	2.64113	-0.0140191	-0.0285613	-0.20893	0.0140191	0.0285613	0.20893
221	44.2	0	-4.31026	2.65115	0.0430256	-0.0249972	-0.0893572	0.0430256	0.034364	0.0893572
222	44.4	0	-4.30854	2.63701	-0.0676516	0.0429078	0.279275	0.0676516	0.0696707	0.279275
223	44.6	0	-4.31252	2.63994	0.0516099	-0.0175743	-0.159635	0.0516099	0.0780976	0.281786
224	44.8	0	-4.30782	2.65395	0.0317322	-0.0511937	-0.120911	0.0478218	0.0511937	0.120911
225	45	0	-4.31014	2.6393	-0.0388596	0.0678317	-0.0334053	0.0933999	0.0800754	0.241672
226	45.2	0	-4.31255	2.63958	-0.00622509	0.0176089	0.2691	0.00622509	0.0176089	0.2691
227	45.4	0	-4.31443	2.63604	-0.00427648	0.0312681	-0.0495073	0.00427648	0.0312681	0.268777
228	45.6	0	-4.32135	2.6489	0.0712049	-0.120273	-0.694784	0.0712049	0.186095	1.13423
229	45.8	0	-4.33066	2.65281	0.0410748	0.0754364	-0.704303	0.0514341	0.122955	0.704303
230	46	0	-4.32938	2.65353	-0.00657975	-0.00394623	0.118199	0.0177527	0.033226	0.118199
231	46.2	0	-4.3197	2.64226	-0.132488	0.0238059	1.41789	0.137332	0.03693	1.43173
232	46.4	0	-4.32163	2.63532	0.0423444	-0.0550352	-0.156976	0.0943228	0.312453	1.65279
233	46.6	0	-4.31377	2.64785	0.0171482	0.0252347	-0.312822	0.0171482	0.0252347	0.312822
234	46.8	0	-4.31781	2.64958	0.0789569	-0.0109553	-0.98239	0.152288	0.0256635	1.81678
235	47	0	-4.33224	2.64916	-0.00527292	0.0647985	-0.215157	0.0130633	0.0647985	0.241933
236	47.2	0	-4.33433	2.65039	0.0213977	-0.014537	0.273844	0.0213977	0.014537	0.273844
237	47.4	0	-4.33383	2.65486	0.00114791	-0.00844016	-0.394499	0.0197761	0.0415836	0.394499
238	47.6	0	-4.32255	2.64695	-0.128251	-9.42402e-06	1.56616	0.131247	0.0340918	1.56616
239	47.8	0	-4.33151	2.65655	0.148433	-0.0192885	-1.85052	0.148433	0.0289814	1.85052
240	48	0	-4.32656	2.6537	-0.140846	-0.0126277	1.84876	0.230143	0.0172856	3.37151
241	48.2	0	-4.31526	2.64061	0.0155515	0.0112895	-0.197134	0.0155515	0.0791688	0.197134
242	48.4	0	-4.34516	2.62025	0.0550847	0.184615	-1.64286	0.0617693	0.184615	1.64286
243	48.6	0	-4.3482	2.61906	-0.0026181	0.0197001	0.247922	0.0502116	0.0197001	0.247922
244	48.8	0	-4.32436	2.66222	0.047792	-0.252397	0.489869	0.047792	0.252397	0.489869
245	49	0	-4.31365	2.64391	-0.097973	0.0682906	0.625652	0.120912	0.0682906	1.29657
246	49.2	0	-4.33113	2.64321	0.0892766	0.00742486	-1.02141	0.0892766	0.103217	1.02141
247	49.4	0	-4.3322	2.65638	-0.0208748	-0.014752	0.239576	0.123083	0.060697	1.149
248	49.6	0	-4.3193	2.65231	-0.0315252	0.00585293	0.541256	0.0315252	0.144393	0.883703
249	49.8	0	-4.32932	2.63666	0.00903532	0.0465974	-0.513501	0.0285513	0.0764932	0.513501
250	50	0	-4.33065	2.64383	0.0306906	-0.024289	-0.00622648	0.0306906	0.024289	0.287765
251	50.2	0	-4.32641	2.66034	0.0193631	-0.0840567	-0.0177902	0.0193631	0.0840567	0.214597
252	50.4	0	-4.34223	2.62816	-0.0295088	0.244441	-0.539601	0.0369062	0.244441	0.539601
253	50.6	0	-4.34916	2.62271	0.019139	-0.0106271	-0.218856	0.019139	0.0317352	0.218856
254	50.8	0	-4.32207	2.6616	-0.03403	-0.28041	1.23868	0.071075	0.28041	1.23868
255	51	0	-4.32611	2.66108	0.0263159	0.0896791	-0.580237	0.0854161	0.0896791	0.580237
256	51.2	0	-4.3307	2.65545	0.016603	-0.00588186	-0.193575	0.0193128	0.0206645	0.193575
257	51.4	0	-4.32619	2.6479	-0.0510696	0.0315277	0.268022	0.0510696	0.0315277	0.268022
258	51.6	0	-4.34166	2.63218	0.0035949	0.154146	-0.678423	0.109264	0.154146	0.678423
259	51.8	0	-4.34138	2.62152	-0.00793266	-0.0116597	0.601947	0.00793266	0.0116597	0.601947
260	52	0	-4.32908	2.63301	0.0179314	-0.120106	0.100998	0.109553	0.120106	0.695039
261	52.2	0	-4.32655	2.65344	0.00630417	-0.05243	-0.287956	0.0452177	0.05243	0.287956
262	52.4	0	-4.33149	2.64965	0.0157495	0.0379558	0.154103	0.0283948	0.0379558	0.485539
263	52.6	0	-4.32732	2.65904	0.0187767	-0.0647377	0.134288	0.0187767	0.0647377	0.134288
264	52.8	0	-4.33609	2.64341	-0.0190269	0.125185	-0.361135	0.0190269	0.125185	0.361135
265	53	0	-4.3477	2.6207	0.0162572	0.0593187	-0.487193	0.101914	0.204239	0.487193
266	53.2	0	-4.35057	2.62368	-0.018932	0.0645531	-0.230681	0.018932	0.0645531	0.230681
267	53.4	0	-4.34539	2.62331	-0.00701339	-0.0219582	0.229345	0.0670301	0.0219582	0.419781
268	53.6	0	-4.34689	2.61992	-0.0234624	0.0345627	0.0334785	0.0234624	0.0345627	0.0334785
269	53.8	0	-4.34668	2.61972	0.00428583	-0.00936685	0.0796055	0.00428583	0.00936685	0.0796055
270	54	0	-4.34787	2.62252	0.0224572	-0.00869971	-0.18318	0.0224572	0.00869971	0.259945
271	54.2	0	-4.34467	2.61766	-0.0480559	0.0170206	0.525777	0.0480559	0.0170206	0.525777
272	54.4	0	-4.34915	2.61785	0.025027	0.0208818	-0.417684	0.0429893	0.0306505	0.515711
273	54.6	0	-4.34697	2.6159	-0.0113162	0.00306129	0.151535	0.0113162	0.0536866	0.151535
274	54.8	0	-4.34585	2.61986	0.0105912	-0.0429256	-0.146214	0.0105912	0.0429256	0.146214
275	55	0	-4.34689	2.62086	0.0120046	-0.00333003	-0.0287222	0.017584	0.043745	0.18231
276	55.2	0	-4.34709	2.61807	-0.0250469	0.0201726	-0.00434078	0.0250469	0.0339068	0.4728
277	55.4	0	-4.34705	2.61767	0.0215435	-0.0226727	-0.304602	0.0276829	0.0878117	0.351549
278	55.6	0	-4.34794	2.63942	0.0575921	-0.0672681	-0.701432	0.0575921	0.0672681	0.701432
279	55.8	0	-4.3112	2.64274	-0.169811	-0.182282	-0.14638	0.169811	0.182282	2.41874
280	56	0	-4.28458	2.65773	-0.0255719	0.0163019	0.692427	0.0862569	0.292257	1.11774
281	56.2	0	-4.325	2.62924	0.0879431	0.166934	-2.39876	0.0879431	0.166934	2.39876
282	56.4	0	-4.32466	2.63417	-0.0182194	-0.0409102	-0.0160931	0.0257452	0.0409102	0.788664
283	56.6	0	-4.30301	2.64883	-0.0563642	-0.156433	1.91399	0.0563642	0.156433	1.91399
284	56.8	0	-4.31041	2.64148	0.038864	0.158197	-1.07825	0.038864	0.158197	1.25372
285	57	0	-4.31991	2.63306	0.00789968	-0.0219219	-0.28535	0.00789968	0.0444094	0.28535
286	57.2	0	-4.30205	2.65851	-0.0050208	-0.164139	0.942739	0.0050208	0.164139	0.942739
287	57.4	0	-4.30711	2.65514	-0.0122461	0.110414	-0.314349	0.0880646	0.110842	1.1768
288	57.6	0	-4.31527	2.63159	-0.020676	0.0696457	-0.105913	0.0304627	0.0696457	0.135851
289	57.8	0	-4.32487	2.6318	0.0545953	-0.00670705	-0.391206	0.0545953	0.0990739	0.391206
290	58	0	-4.31698	2.63376	0.00838159	0.130197	1.52529	0.141857	0.405036	1.52529
291	58.2	0	-4.34619	2.63305	0.00300821	-0.0810731	-1.94446	0.305593	0.0810731	1.94446
292	58.4	0	-4.31885	2.64692	-0.0263757	0.00374987	0.191679	0.0916153	0.412531	0.840486
293	58.6	0	-4.31776	2.62505	-0.0373486	-0.0443778	0.732373	0.0373486	0.0605468	0.732373
294	58.8	0	-4.28904	2.6551	-0.0336387	-0.219252	0.830245	0.0336387	0.219252	1.0113
295	59	0	-4.36016	2.63572	0.226857	0.345607	-0.699013	0.266818	0.345607	0.699013
296	59.2	0	-4.31099	2.64749	-0.139159	-0.313227	-0.523338	0.209968	0.313227	0.523338
297	59.4	0	-4.31482	2.6515	-0.0239622	0.195645	-0.379026	0.108807	0.195645	0.379026
298	59.6	0	-4.15471	2.69437	-0.697836	-1.10059	5.89278	0.697836	1.10059	5.89278
299	59.8	0	-4.13661	2.68225	0.139228	0.612698	-5.96324	0.139228	0.612698	11.0551
300	60	1	-4.04872	2.68399	-0.618466	-0.694003	7.32435	0.618466	0.694003	8.74369
301	60.2	1	-3.82718	2.79609	-0.435901	-1.20351	26.9546	0.435901	1.20351	26.9546
302	60.4	1	-3.67339	2.88686	-0.152285	-0.575762	14.8967	0.152285	0.575762	14.8967
303	60.6	1	-4.24534	2.17607	-0.258573	8.44066	-44.0802	0.258573	8.44066	49.3688
304	60.8	1	-5.01235	1.42129	0.81279	1.00673	-3.89971	0.81279	2.252	42.5326
305	61	1	-4.48874	1.75885	-1.594	-3.38738	56.1064	1.594	3.38738	56.1064
306	61.2	1	-4.08883	1.92418	-0.199781	-1.28432	81.559	0.199781	1.28432	81.559
307	61.4	1	-3.40484	1.76227	-3.81122	-5.68749	130.743	3.81122	5.68749	130.743
308	61.6	1	-3.24885	1.6746	-0.586181	-0.419739	64.3854	0.618796	1.45055	64.3854
309	61.8	1	-3.06249	1.55338	-0.8416	-1.25327	16.8846	0.8416	1.25327	16.8846
310	62	1	-2.69156	1.35318	-0.703589	-2.09815	53.1239	0.703589	2.09815	53.1239
311	62.2	1	-2.43332	1.17273	-0.451027	-1.61823	48.3919	0.451027	1.61823	48.3919
312	62.4	1	-1.94989	0.89017	-0.220833	-2.43766	48.9356	0.2601	2.43766	48.9356
313	62.6	1	-1.94766	0.787811	-0.46315	-0.159617	-2.36697	0.46315	0.345481	8.10242
314	62.8	1	-2.06072	0.824423	0.0797234	0.68487	-18.101	0.107876	0.68487	18.101
315	63	0	-2.04624	0.807764	-0.144628	-0.622608	15.5507	0.144628	0.790388	19.7932
316	63.2	0	-2.04851	0.835328	0.128278	0.5524	5.51542	0.258499	0.5524	5.51542
317	63.4	0	-2.08607	0.888006	0.143292	0.248616	7.21326	0.163385	0.248616	7.21326
318	63.6	0	-2.05857	0.83252	-0.140174	-0.0493303	-4.11726	0.142377	1.18412	8.63415
319	63.8	0	-1.93844	0.522394	-1.67568	-2.25032	-7.33807	1.67568	2.25032	16.4346
320	64	0	-2.16085	0.198821	-1.21211	1.421	-77.7856	1.21211	1.421	77.7856
321	64.2	0	-3.24017	0.199902	-1.26713	6.56086	-112.662	1.58518	6.56086	112.662
322	64.4	0	-4.07358	0.0827214	0.197434	3.05336	11.8922	1.02888	3.05336	11.8922
323	64.6	0	-4.18357	0.0874636	0.286332	-0.761655	58.4434	0.529456	1.62902	58.4434
324	64.8	0	-3.80887	-0.0920019	-0.764277	-2.082	107.656	0.764277	2.082	107.656
325	65	0	-2.96333	-1.04174	-0.924029	-6.30637	113.375	0.924029	6.30637	113.375
326	65.2	0	-3.00685	-1.26328	-0.730635	0.220831	-55.3272	0.730635	0.614779	55.3272
327	65.4	0	-4.09006	-0.685387	0.592615	10.0233	-164.487	0.592615	10.0233	164.487
328	65.6	0	-4.92436	-0.257598	0.0508932	-0.719353	54.6494	1.7852	3.64289	74.3599
329	65.8	0	-4.20638	-0.719045	-0.329475	-4.0975	102.976	0.329475	4.0975	102.976
330	66	0	-3.97525	-0.900154	0.0859167	-0.317803	18.2215	0.310905	0.601384	18.2215
331	66.2	0	-3.90401	-1.02083	-0.326352	-1.03035	1.149	0.326352	1.03035	1.52202
332	66.4	0	-3.85583	-1.06108	0.0235906	-0.29461	16.4304	0.201058	0.815692	16.4304
333	66.6	0	-3.76191	-1.26083	-0.399385	-1.27522	26.2483	0.399385	1.27522	26.2483
334	66.8	0	-3.59056	-2.0311	-1.5878	-3.92464	65.0959	1.5878	3.92464	65.0959
335	67	0	-3.7006	-1.93554	0.0547757	1.47266	-22.3844	0.0990294	1.47266	24.0337
336	67.2	0	-3.70219	-1.77256	0.468931	1.22542	7.99523	0.468931	1.22542	11.8848
337	67.4	0	-3.66551	-1.90024	-0.439631	-2.06744	10.4435	0.470711	2.06744	13.2479
338	67.6	0	-3.64424	-2.03029	-0.015336	0.222379	3.24182	0.171892	0.344179	3.24182
339	67.8	0	-3.6753	-2.18838	-0.367877	-0.586332	8.16302	0.536297	0.721812	8.16302
340	68	0	-3.62941	-2.23422	0.272252	-0.063123	6.70159	0.497362	1.11989	7.16185
341	68.2	0	-3.6162	-2.09045	0.155641	0.429763	-2.5458	0.155641	0.429763	2.5458
342	68.4	0	-3.62063	-2.15711	-0.262458	-0.507397	1.37374	0.262458	0.507397	1.4426
343	68.6	0	-3.62737	-2.23394	-0.0654479	-0.206191	0.782107	0.11785	0.206191	1.37103
344	68.8	0	-3.64747	-2.1719	0.0289716	0.335943	-6.00942	0.0470298	0.35188	6.00942
345	69	0	-3.6434	-2.19398	-0.0213051	0.134484	4.12492	0.111191	0.820934	4.12492
346	69.2	0	-3.67582	-2.18181	-0.232459	-0.151767	-3.65445	0.232459	0.151767	6.27748
347	69.4	0	-3.67766	-2.19525	0.101094	-0.0596368	-0.839466	0.101094	0.0596368	0.839466
348	69.6	0	-3.66319	-2.23176	-0.0140717	-0.265975	2.49682	0.0298378	0.265975	2.49682
349	69.8	0	-3.67158	-2.20192	-0.0249522	0.130934	-2.0125	0.188377	0.504239	2.0125
350	70	0	-3.66864	-2.22025	0.0533435	0.0395744	-1.58017	0.0533435	0.102731	1.58017
351	70.2	0	-3.66949	-2.22117	-0.0456107	-0.0527167	0.803405	0.0456107	0.0527167	0.881488
352	70.4	0	-3.69539	-2.21332	-0.0522349	0.123923	-2.58603	0.179957	0.123923	3.81184
353	70.6	0	-3.71464	-2.2762	-0.305813	-0.371637	0.811025	0.305813	0.371637	0.87079
354	70.8	0	-3.69015	-2.2103	0.360205	0.530384	-2.3115	0.360205	0.530384	2.89585
355	71	0	-3.70245	-2.25233	-0.195493	-0.441108	0.805407	0.200546	0.441108	1.31729
356	71.2	0	-3.62231	-2.17819	0.466969	0.327247	11.4682	0.620612	0.327247	11.4682
357	71.4	0	-3.63241	-2.23179	-0.0748314	-0.353769	5.7388	0.174041	0.353769	5.7388
358	71.6	0	-3.64916	-2.16987	-0.112016	0.281145	-10.7477	0.362547	0.722886	10.7477
359	71.8	0	-3.64197	-2.23056	-0.000504625	-0.297982	7.59637	0.166409	0.297982	7.59637
360	72	0	-3.67022	-2.19289	-0.0686024	0.132531	-4.68409	0.111684	0.96667	4.68409
361	72.2	0	-3.68317	-2.33314	-0.280491	-0.388115	1.30973	0.280491	0.486528	2.07406
362	72.4	0	-3.68294	-2.32708	-0.0619994	-0.292533	-2.87004	0.278632	0.889686	9.24179
363	72.6	0	-3.68074	-2.3012	0.141552	0.415418	-0.118169	0.141552	0.415418	0.190365
364	72.8	0	-3.6846	-2.30591	-0.0167702	-0.0310241	-0.168064	0.0558831	0.0310241	0.377071
365	73	0	-3.68223	-2.3254	-0.095075	-0.18727	1.5906	0.14656	0.2333	1.66639
366	73.2	0	-3.70787	-2.36046	-0.0872394	0.0830124	1.45134	0.224922	0.285188	1.45134
367	73.4	0	-3.7176	-2.26242	0.030899	0.223112	-8.9261	0.30532	0.834998	8.9261
368	73.6	0	-3.71387	-2.3063	0.0104853	-0.11583	2.00626	0.0273914	0.132916	2.13694
369	73.8	0	-3.72979	-2.27804	0.00450743	0.23898	3.78711	0.129268	0.23898	3.78711
370	74	0	-3.73404	-2.33117	-0.197339	-0.318191	-2.17945	0.197339	0.318191	2.17945
371	74.2	0	-3.71921	-2.33891	0.0489291	0.0875747	-2.7078	0.249567	0.254176	2.7078
372	74.4	0	-3.7414	-2.37221	-0.188113	-0.242733	3.38858	0.188113	0.242733	3.38858
373	74.6	0	-3.73602	-2.3927	0.0716047	-0.14122	-0.0414919	0.0716047	0.202427	0.0844607
374	74.8	0	-3.73571	-2.39517	0.0441259	0.126672	-2.01618	0.192434	0.126672	2.01618
375	75	0	-3.73996	-2.44518	-0.210994	-0.395514	1.74944	0.210994	0.395514	2.03548
376	75.2	0	-3.73909	-2.43064	0.170704	0.273781	0.106038	0.240098	0.273781	0.952069
377	75.4	0	-3.73218	-2.37624	-0.0576731	0.131226	-0.0476533	0.298564	0.205317	3.74429
378	75.6	0	-3.74161	-2.38372	-0.0126981	0.00588006	0.0637547	0.165633	0.00838678	1.71335
379	75.8	0	-3.73937	-2.3989	0.00171497	-0.0177755	-1.90359	0.101058	0.254395	2.05069
380	76	0	-3.72679	-2.43531	0.0343395	-0.307354	0.360108	0.0525892	0.307354	0.360108
381	76.2	0	-3.74389	-2.43115	-0.0711723	0.204858	-0.0279437	0.154153	0.204858	1.15833
382	76.4	0	-3.73277	-2.40812	0.0792827	-0.0166825	0.735584	0.0792827	0.0166825	0.735584
383	76.6	0	-3.74024	-2.31191	0.307508	0.717379	-21.9205	0.307508	0.717379	21.9205
384	76.8	0	-3.75632	-2.26209	-0.0922905	-0.107557	-4.27536	0.211036	0.307113	4.90608
385	77	0	-3.68622	-2.51934	-0.316393	-1.2121	24.0391	0.316393	1.2121	24.0391
386	77.2	0	-3.67804	-2.42209	0.30241	0.499788	-10.7625	0.30241	0.499788	10.7625
387	77.4	0	-3.70762	-2.43136	-0.379692	-0.0707076	0.873466	0.379692	0.0707076	0.873466
388	77.6	0	-3.68291	-2.48611	-0.00501216	-0.407471	5.34461	0.00915409	0.407471	5.34461
389	77.8	0	-3.69421	-2.41207	0.236798	0.500097	-6.82025	0.296199	0.500097	6.82025
390	78	0	-3.69293	-2.5589	-0.387403	-0.621705	3.5495	0.563897	0.918433	7.68119
391	78.2	0	-3.69506	-2.52195	0.0327856	0.0705955	-0.321842	0.0327856	0.172941	2.33455
392	78.4	0	-3.69786	-2.5373	-0.0173889	-0.0540764	3.4764	0.166092	0.0540764	3.4764
393	78.6	0	-3.70218	-2.47437	0.0632149	0.21476	-6.25024	0.0966856	0.589476	6.25024
394	78.8	0	-3.72041	-2.58587	-0.25139	-0.250049	1.95929	0.467277	0.722202	6.49325
395	79	0	-3.70627	-2.45093	0.174929	0.289809	-2.69699	0.638085	0.956153	3.90983
396	79.2	0	-3.70124	-2.55273	-0.0686802	-0.287412	0.96263	0.103639	0.330034	0.96263
397	79.4	0	-3.7065	-2.55173	-0.0666225	0.0203763	2.19698	0.0791533	0.042429	2.19698
398	79.6	0	-3.69132	-2.56181	0.0797415	-0.0323651	-1.68738	0.095546	0.272267	1.68738
399	79.8	0	-3.70613	-2.55508	-0.0955764	0.00436613	1.51724	0.0955764	0.00914996	1.56848
400	80	0	-3.71896	-2.5913	-0.0605916	-0.218477	1.81076	0.157314	0.218477	1.81076
401	80.2	0	-3.7068	-2.57603	0.0803695	0.116059	0.596964	0.0803695	0.144584	0.596964
402	80.4	0	-3.70073	-2.53219	0.144442	0.266474	-2.48541	0.144442	0.266474	2.48541
403	80.6	0	-3.70774	-2.57451	-0.214604	-0.360776	0.279603	0.214604	0.360776	3.15198
404	80.8	0	-3.70295	-2.57418	0.0609339	0.0908398	2.48615	0.0968827	0.140865	2.48615
405	81	0	-3.72072	-2.59461	-0.135987	-0.0681184	-2.66707	0.135987	0.0681184	2.66707
406	81.2	0	-3.70909	-2.62218	-0.00983681	-0.0214888	1.7162	0.102987	0.42621	1.7162
407	81.4	0	-3.7028	-2.551	0.257061	0.34482	-1.60372	0.257061	0.34482	3.15178
408	81.6	0	-3.71232	-2.57648	-0.15646	-0.319799	1.04934	0.15646	0.319799	1.90987
409	81.8	0	-3.71216	-2.63214	0.0330868	-0.0567558	5.57916	0.530931	0.481553	5.57916
410	82	0	-3.70276	-2.55744	0.054122	0.229574	-4.6455	0.054122	0.229574	4.6455
411	82.2	0	-3.70205	-2.61208	-0.117114	-0.390543	-0.254204	0.117114	0.390543	3.01414
412	82.4	0	-3.71149	-2.68722	-0.129695	0.00267579	5.29871	0.384267	0.775617	5.29871
413	82.6	0	-3.72196	-2.65314	-0.0269981	-0.0273868	-3.97834	0.0958032	0.0273868	3.97834
414	82.8	0	-3.70339	-2.68798	-0.0310857	-0.178294	0.542708	0.0783817	0.212009	0.542708
415	83	0	-3.73466	-2.65559	-0.0377766	0.182868	2.95631	0.0827294	0.253167	2.95631
416	83.2	0	-3.72603	-2.63045	0.0372391	0.000495434	-3.71566	0.197048	0.455526	3.7425
417	83.4	0	-3.71746	-2.71638	-0.0893607	-0.330308	3.45193	0.1085	0.330308	3.45193
418	83.6	0	-3.71843	-2.63421	0.184349	0.502779	-1.77247	0.184349	0.502779	3.25489
419	83.8	0	-3.73454	-2.73775	-0.410655	-0.670885	2.37362	0.410655	0.670885	2.37362
420	84	0	-3.71706	-2.66311	0.37082	0.674192	-2.43715	0.37082	0.674192	4.16456
421	84.2	0	-3.73184	-2.68017	-0.245675	-0.49157	0.32598	0.245675	0.49157	3.82607
422	84.4	0	-3.72507	-2.6831	0.161535	0.371937	1.84643	0.161535	0.371937	1.84643
423	84.6	0	-3.74731	-2.6898	-0.219271	-0.286047	-2.13211	0.219271	0.286047	2.13211
424	84.8	0	-3.73551	-2.72109	0.0645866	-0.0777266	-0.737836	0.0645866	0.0777266	0.737836
425	85	0	-3.72679	-2.74282	-0.0531946	-0.0924505	0.990695	0.0982025	0.0924505	1.15739
426	85.2	0	-3.72735	-2.6612	0.270838	0.553338	-2.00812	0.270838	0.553338	3.50889
427	85.4	0	-3.69861	-2.68955	-0.00222716	-0.712503	1.71463	0.00222716	0.712503	1.71463
428	85.6	0	-3.73079	-2.67514	-0.142019	0.121502	-0.85005	0.142019	0.155033	0.85005
429	85.8	0	-3.75048	-2.627	0.000898251	0.270287	-5.0084	0.147882	0.270287	6.97991
430	86	0	-3.75744	-2.69415	-0.0756663	-0.0915479	4.55158	0.312921	0.889758	4.55158
431	86.2	0	-3.80682	-2.64253	-0.396717	0.124694	-14.3513	0.486496	0.1864	14.3513
432	86.4	0	-3.76291	-3.83507	-2.52971	-4.73163	0.266929	2.52971	6.96061	17.9339
433	86.6	0	-4.10835	-4.04516	-2.20711	-0.314129	18.5946	2.20711	2.16676	22.0716
434	86.8	0	-4.12783	-3.44682	1.9174	2.5459	-68.1477	1.9174	2.5459	68.1477
435	87	0	-4.73663	-3.13559	-1.5159	3.21295	-40.8123	1.57053	3.21295	40.8123
436	87.2	0	-4.72241	-2.96036	0.771914	0.0932288	-3.2089	0.771914	0.0932288	4.78309
437	87.4	0	-5.05544	-2.28828	1.72861	4.44221	35.4686	1.72861	4.44221	35.4686
438	87.6	0	-5.0065	-2.03053	0.325028	-0.199543	17.2606	0.325028	0.398489	17.2606
439	87.8	0	-4.65569	-2.48752	0.394079	-3.17627	57.6156	0.496699	3.17627	57.6156
440	88	0	-4.54837	-2.54061	0.149172	0.140016	6.95269	0.149172	0.277066	6.95269
441	88.2	0	-4.43852	-2.60875	0.494593	-1.3475	28.8747	0.494593	1.58283	28.8747
442	88.4	0	-4.33798	-2.70991	0.361887	0.0807703	17.1187	0.361887	0.221624	17.1187
443	88.6	0	-4.09678	-2.63434	0.954982	-0.680102	31.664	1.64001	2.52005	31.664
444	88.8	0	-4.12818	-3.51677	-0.254313	-3.91384	63.7915	0.254313	3.91384	63.7915
445	89	0	-4.19355	-3.48953	-0.137624	1.01961	-17.1959	0.563158	1.21313	17.1959
446	89.2	0	-4.17036	-2.38051	0.556963	5.64824	-71.5732	0.556963	5.64824	71.5732
447	89.4	0	-4.06768	-2.36565	0.206357	-1.03064	27.2241	0.54865	1.03064	27.2241
448	89.6	0	-4.12489	-2.81435	-0.372596	-2.38054	58.0776	0.372596	2.38054	58.0776
449	89.8	0	-4.16406	-2.78325	-0.0158358	-0.143662	-4.00853	0.132156	2.64161	4.00853
450	90	0	-4.20575	-3.05501	-0.107381	-0.909632	8.13272	0.120001	0.909632	8.13272
451	90.2	0	-4.2685	-2.86252	-0.350613	1.34334	-13.965	0.540277	1.34334	13.965
452	90.4	0	-4.24589	-2.9312	0.086249	-0.912504	-2.27019	0.086249	0.912504	6.59356
453	90.6	0	-4.25423	-3.00792	0.0148619	-0.0306964	5.5169	0.164027	0.180389	5.5169
454	90.8	0	-4.23091	-2.9471	0.0860467	0.743827	-9.63671	0.0860467	0.79091	9.63671
455	91	0	-4.2093	-2.89126	0.0929324	-0.159615	-2.75246	0.0929324	0.159615	8.32295
456	91.2	0	-4.22205	-2.97086	-0.108557	-0.397322	-0.594146	0.108557	0.397322	1.59532
457	91.4	0	-4.19895	-2.91999	0.211307	0.643665	-3.6209	0.211307	0.68538	3.6209
458	91.6	0	-4.17478	-2.75561	-0.0338709	0.466229	-2.25	0.211827	0.528412	2.25
459	91.8	0	-4.19051	-2.84334	0.00515655	-0.412222	3.01604	0.060317	0.436273	3.01604
460	92	0	-4.20132	-2.84164	-0.0697496	-0.0625153	2.92512	0.0697496	0.19248	2.92512
461	92.2	0	-4.20269	-2.86487	0.051261	-0.118473	-6.87991	0.170873	0.14828	6.87991
462	92.4	0	-4.21699	-2.94748	-0.141084	-0.354359	1.16349	0.141084	0.354359	3.34517
463	92.6	0	-4.25902	-3.02772	-0.334519	-0.531	7.69444	0.334519	0.531	7.69444
464	92.8	0	-4.27816	-3.11901	0.0461407	-0.290007	0.996976	0.150997	0.365903	0.996976
465	93	0	-4.29689	-3.11931	-0.0956001	-0.0177639	1.85084	0.0956001	0.044024	1.85084
466	93.2	0	-4.52066	-2.99182	-2.10781	1.37483	-35.4019	2.10781	1.56477	35.4019
467	93.4	0	-4.95338	-2.28643	-1.14787	3.37574	-42.4913	1.14787	3.37574	45.8692
468	93.6	0	-5.16654	-2.30469	-0.972727	-0.582992	35.2098	0.972727	0.582992	35.2098
469	93.8	0	-5.41225	-2.72193	-1.76998	-2.18914	54.2462	1.76998	2.18914	54.2462
470	94	0	-5.62674	-3.00734	-0.826674	-1.73273	27.7669	0.826674	1.73273	27.7669
471	94.2	0	-5.80869	-3.39046	-0.642567	-2.07975	22.7204	0.642567	2.07975	22.7204
472	94.4	0	-5.85436	-3.40555	-0.128409	1.44054	19.3172	0.32963	2.44775	19.3172
473	94.6	0	-5.55761	-2.7326	0.72238	2.76459	-15.9932	0.72238	2.76459	15.9932
474	94.8	0	-5.52158	-2.69214	0.126058	0.125971	19.8615	0.126058	0.125971	19.8615
475	95	0	-5.56567	-2.81498	0.0434405	-0.682166	13.9714	0.232648	0.716649	13.9714
476	95.2	0	-5.3863	-2.77605	0.902618	0.633511	17.9737	0.902618	0.633511	17.9737
477	95.4	0	-5.21272	-2.72181	0.532298	0.415714	-3.23199	0.532298	0.415714	3.23199
478	95.6	0	-5.22902	-2.77326	-0.141686	-0.302219	26.2679	0.332945	0.302219	26.2679
479	95.8	0	-5.22754	-2.8324	0.59466	-0.206493	17.6687	0.731206	0.206493	17.6687
480	96	0	-5.13312	-2.93952	0.653425	-0.131032	10.6237	0.653425	0.434463	10.6237
481	96.2	0	-5.17833	-3.1498	0.318199	-1.90336	31.6495	0.453538	1.90336	31.6495
482	96.4	0	-5.86847	-4.10167	0.899934	-5.81635	94.6752	0.998753	5.81635	94.6752
483	96.6	0	-6.34032	-4.38581	0.203182	-1.13608	13.5263	0.250049	3.9079	62.7755
484	96.8	0	-5.88449	-4.25091	0.389403	1.93768	-23.4992	0.415814	1.93768	23.4992
485	97	0	-5.19437	-4.05701	1.31834	4.07957	-12.842	1.31834	4.07957	12.842
486	97.2	0	-4.71635	-3.6683	-0.421597	2.44764	-5.04425	0.421597	2.44764	5.04425
487	97.4	0	-4.58168	-3.59456	0.331009	0.109295	39.6006	0.331009	0.846295	39.6006
488	97.6	0	-4.66151	-3.66196	-0.00975166	-0.41939	24.1985	0.074412	0.41939	24.1985
489	97.8	0	-5.1079	-3.78974	0.0682947	-4.51621	82.8171	0.144735	4.72418	82.8171
490	98	0	-5.62114	-3.92721	-0.012788	-0.34754	15.3107	0.012788	0.34754	15.3107
491	98.2	0	-5.74338	-3.931	0.00307288	-1.21093	40.3558	0.0692311	1.29113	47.3467
492	98.4	0	-5.8586	-3.93636	-0.0336555	-0.127054	12.82	0.256974	0.610119	12.82
493	98.6	0	-5.71855	-3.9407	0.0156624	1.20319	-24.4177	0.072614	1.20319	24.4177
494	98.8	0	-5.64181	-3.94398	0.0831984	0.206776	4.49579	0.228115	0.411303	4.49579
495	99	0	-5.29578	-4.2158	1.09048	1.88725	-42.4009	1.81686	1.88725	42.4009
496	99.2	0	-5.61681	-4.21583	-0.0279842	-2.80494	61.7684	0.752483	2.80494	61.7684
497	99.4	0	-5.66708	-4.19449	0.0246809	0.704255	-14.0554	0.140079	0.704255	14.0554
498	99.6	0	-5.46911	-4.30135	0.887531	1.24043	-18.3303	0.887531	1.24043	18.3303
499	99.8	0	-5.3098	-4.65052	1.55548	0.967303	18.4708	1.55548	0.967303	23.0228
500	100	0	-5.06557	-4.79208	0.433049	0.775427	-7.66278	0.433049	0.928815	7.66278
501	100.2	0	-5.19837	-4.7817	-0.109662	-1.03527	7.21009	0.109662	1.03527	7.21009
502	100.4	0	-5.85045	-4.67017	-0.0507166	-4.19598	51.9738	0.304817	4.19598	51.9738
503	100.6	0	-6.26284	-4.77548	0.813526	-0.487404	28.9847	1.04416	0.487404	28.9847
504	100.8	0	-6.29257	-4.77751	0.171412	-0.123482	1.55576	0.171412	0.123482	1.55576
505	101	0	-6.44072	-4.78707	0.307772	-1.11774	10.25	0.307772	1.11774	10.25
506	101.2	0	-6.53791	-4.80507	0.283422	-0.0236328	4.83784	0.283422	0.292568	4.83784
507	101.4	0	-6.6642	-4.75701	-0.107683	-0.787231	11.3699	0.164903	0.787231	11.3699
508	101.6	0	-6.78487	-4.65097	-0.293361	-1.13096	2.75173	0.293361	1.13096	2.75173
509	101.8	0	-6.77309	-4.67412	0.0604631	0.10048	1.57702	0.126299	0.108937	1.85623
510	102	0	-6.79894	-4.62769	-0.0690402	-0.210468	-2.57266	0.324251	0.224585	2.57266
511	102.2	0	-6.79192	-4.65203	0.071601	0.064023	-3.96214	0.0968306	0.127058	3.96214
512	102.4	0	-6.83902	-4.6583	-0.00403807	-0.31741	-1.27915	0.345867	0.31741	2.31836
513	102.6	0	-6.91773	-4.59565	-0.0973439	-0.495974	0.653848	0.17058	0.495974	0.653848
514	102.8	0	-6.93427	-4.60754	0.235387	0.0869742	0.952174	0.235387	0.138234	1.11178
515	103	0	-6.94449	-4.63378	0.0780552	0.0196802	2.77571	0.0780552	0.02888	2.77571
516	103.2	0	-6.96977	-4.62211	0.00895628	-0.11046	2.37193	0.0972596	0.209534	2.52966
517	103.4	0	-6.97226	-4.62833	0.0236119	0.002163	-0.712574	0.0449562	0.0957378	0.712574
518	103.6	0	-6.89657	-4.726	0.397757	0.894514	-5.15699	0.397757	0.894514	5.15699
519	103.8	0	-6.82984	-4.74125	-0.237485	0.0375238	-1.07512	0.237485	0.277098	1.18359
520	104	0	-6.84717	-4.72942	0.0339187	-0.27376	11.3399	0.0634138	0.27376	11.3399
521	104.2	0	-6.85588	-4.70989	-0.29706	-0.267022	-4.67018	0.515795	0.851256	7.81045
522	104.4	0	-6.78041	-4.46523	-1.29205	0.581992	-13.5343	1.29205	1.35234	13.5343
523	104.6	0	-5.64221	-4.76037	0.996463	9.66232	-120.668	1.30135	9.66232	120.668
524	104.8	0	-4.53033	-4.97816	-0.45119	1.22423	-4.83064	0.617602	1.50244	20.3877
525	105	0	-5.39672	-4.14197	-3.7128	-4.202	46.7869	3.80086	4.6917	46.7869
526	105.2	0	-5.15409	-3.92884	-1.17879	0.992959	-23.1407	1.21886	0.992959	23.1407
527	105.4	0	-4.99154	-3.9389	0.0210709	1.02451	-10.7008	0.0210709	1.02451	10.7008
528	105.6	0	-4.60528	-3.76383	-1.47639	2.60818	-52.6301	1.47639	2.60818	52.6301
529	105.8	0	-3.60908	-3.21944	-0.564274	4.36845	-75.8638	0.564274	5.02425	87.8245
530	106	0	-4.22933	-2.9909	-2.81631	-3.58202	81.2162	2.81631	3.58202	81.2162
531	106.2	0	-4.60871	-2.80821	-0.555478	-0.630499	19.8965	0.555478	0.630499	19.8965
532	106.4	0	-4.40419	-2.30362	-2.24387	2.03049	-56.589	2.24387	2.03049	56.589
533	106.6	0	-3.71629	-1.30728	-3.61124	5.69316	-10.8007	3.61124	5.69316	10.8007
534	106.8	0	-2.91199	-1.30086	1.40457	2.28674	-7.12734	1.40457	2.43168	7.12734
535	107	0	-2.95474	-1.29563	-0.296043	-0.381861	4.66176	0.296043	0.530299	4.66176
536	107.2	0	-3.08984	-1.29509	-0.130596	-0.438038	11.9801	0.130596	0.438038	11.9801
537	107.4	0	-3.14391	-1.25354	-0.129426	-0.526447	33.7179	0.545933	0.942545	33.7179
538	107.6	0	-3.47796	-1.39219	0.471018	-2.39618	76.6385	0.471018	2.39618	76.6385
539	107.8	0	-4.17258	-0.989868	-2.07859	-5.09657	116.198	2.07859	5.09657	116.198
540	108	0	-4.75972	-0.321653	-0.921635	-2.44219	58.4951	0.921635	2.44219	58.4951
541	108.2	0	-4.94206	0.097815	-0.683233	-1.97064	72.522	0.683233	1.97064	72.522
542	108.4	0	-5.38473	0.608763	1.16432	-3.26548	52.3137	1.16432	3.26548	52.3137
543	108.6	0	-5.44531	0.138066	1.16352	2.9447	-51.7899	1.16352	2.9447	51.7899
544	108.8	0	-5.35391	0.153641	-1.02132	-0.488028	-6.35916	1.02132	0.488028	6.35916
545	109	0	-5.26911	0.317567	-0.487791	0.224933	-29.3805	0.487791	1.91599	29.3805
546	109.2	0	-4.65439	-0.110804	-1.15885	2.93907	-37.1574	1.15885	3.73142	37.1574
547	109.4	0	-4.32565	0.0872263	-1.95918	1.31919	-18.4618	1.95918	1.31919	18.4618
548	109.6	0	-3.57181	0.477545	-6.19728	2.6666	-19.4507	6.19728	2.6666	19.4507
549	109.8	0	-3.29535	0.524648	-1.43364	1.63528	-7.02888	1.43364	1.63528	7.02888
550	110	0	-2.73298	0.197189	1.669	4.43788	-118.633	1.8145	4.43788	118.633
551	110.2	0	-1.83485	-0.175147	0.532942	3.55561	-102.338	0.532942	3.55561	102.338
552	110.4	0	-0.94403	-0.168171	1.26224	4.49179	-2.52923	1.26224	4.49179	28.4242
553	110.6	0	-1.06938	-0.0116353	-1.95712	-1.87735	104.705	1.95712	1.87735	104.705
554	110.8	0	-0.516665	-0.0571903	0.985229	4.6442	-58.9806	0.985229	4.6442	58.9806
555	111	0	-0.221504	-0.149529	-0.281481	-0.761766	16.7696	0.92036	1.60793	16.7696
556	111.2	0	-0.590487	0.0246913	-0.73436	-2.22928	73.3633	0.800368	2.22928	73.3633
557	111.4	0	-0.61744	0.00770593	0.55765	1.09626	-16.8165	0.55765	1.09626	31.9881
558	111.6	0	-0.487259	-0.000137017	-0.296005	0.136436	-14.6039	0.296005	1.11637	30.3313
559	111.8	0	-0.8179	0.294012	-1.45816	-2.27415	30.0018	1.45816	2.27415	30.0018
560	112	0	-1.19635	0.752948	-1.55462	-2.24765	34.1599	1.55462	2.24765	34.1599
561	112.2	0	-1.16056	1.01013	-0.853386	0.788269	34.268	1.14559	2.14734	34.268
562	112.4	0	-0.923779	0.791689	0.630312	1.68023	-20.6892	0.630312	1.83642	20.6892
563	112.6	0	-0.614126	1.01756	-2.6762	-0.606835	-5.32945	2.6762	2.13392	20.239
564	112.8	0	-0.591347	1.12495	0.188711	0.566003	-7.33691	0.188711	0.607535	7.33691
565	113	0	-0.130051	1.05064	-1.05447	2.80964	-22.59	1.09822	2.80964	22.59
566	113.2	0	0.0944344	1.43612	-2.2531	-0.843383	31.0269	2.2531	1.8904	31.0269
567	113.4	0	0.24609	1.83937	-2.24654	1.26331	-46.4256	2.24654	1.38957	64.0116
568	113.6	0	0.928919	1.68907	1.46355	3.40652	-123.141	1.46355	3.40652	123.141
569	113.8	0	1.03257	1.53879	-0.268163	-0.697399	10.626	1.3678	0.697399	24.5301
570	114	0	0.991516	1.57403	-0.134081	-0.348699	5.31302	0.6839	0.348699	12.2651
571	114.2	0	0.950463	1.60926	0	0	0	0	0	0
572	114.4	0	0.580575	1.7776	-1.00325	-2.11295	76.9118	1.00325	2.11295	76.9118
573	114.6	0	0.493774	1.78446	0.0691491	-0.121722	36.4497	0.412341	0.138077	36.4497
574	114.8	0	0.440203	1.88231	-0.321848	-0.420841	16.9953	0.321848	0.420841	16.9953
575	115	0	0.428746	2.28926	-1.78731	-1.58771	124.069	1.78731	1.58771	124.069
576	115.2	0	0.399082	2.5782	-1.51848	-0.587278	27.9256	1.51848	0.587278	27.9256
577	115.4	0	1.24071	2.53595	-3.79153	4.58372	15.0906	3.79153	4.58372	15.0906
578	115.6	0	1.62346	2.7041	-0.745024	-2.07074	28.627	0.745024	2.07074	28.627
579	115.8	0	1.69478	2.65721	-0.150913	1.8384	-4.03341	0.496994	1.8384	10.9443
580	116	0	1.92699	2.30022	0.222339	1.62482	-34.7246	0.222339	1.62482	34.7246
581	116.2	0	2.03017	2.22366	-0.435312	0.686008	40.9595	0.515487	0.686008	40.9595
582	116.4	0	2.28151	2.17294	-1.16116	0.804359	39.6337	1.16116	0.804359	39.6337
583	116.6	0	2.52765	1.50957	-0.48658	1.09298	109.955	4.64226	9.00853	109.955
584	116.8	0	2.75053	1.98185	-0.00923222	0.0158628	5.70661	0.582671	0.770293	5.70661
585	117	0	2.69109	1.93128	0.0928763	-0.0517168	1.41605	0.31648	0.375624	1.41605
586	117.2	0	2.73147	2.12701	0.0256785	-1.25365	0.311881	0.604017	1.25365	0.449057
587	117.4	0	2.78466	2.57258	-0.0158532	-1.31807	19.1912	1.36985	3.2897	19.1912
588	117.6	0	2.75121	2.57022	-0.342423	-0.939926	3.26775	0.342423	0.939926	3.26775
589	117.8	0	2.7693	2.79802	0.129428	-1.17893	6.96176	0.302469	1.17893	6.96176
590	118	0	2.73112	2.75866	0.173235	0.289726	0.453505	0.290586	0.289726	1.13038
591	118.2	0	2.75607	2.85701	-0.232843	-0.644424	-1.22259	0.232843	0.644424	1.22259
592	118.4	0	2.8038	2.94777	-0.166599	-0.394526	0.489977	0.166599	0.394526	0.768477
593	118.6	0	2.79456	2.94697	0.108869	0.110781	2.07266	0.108869	0.110781	2.07266
594	118.8	0	2.74732	2.89459	0.19763	0.379979	2.62986	0.19763	0.379979	2.62986
595	119	0	2.74251	2.8635	-0.0395872	0.0752514	-0.808744	0.0395872	0.198892	0.808744
596	119.2	0	2.75447	2.88977	-0.0991897	-0.330196	3.40898	0.177831	0.330196	3.40898
597	119.4	0	2.83058	3.01762	-0.259921	-0.807984	-2.02397	0.259921	0.807984	2.02397
598	119.6	0	2.82089	3.00409	0.240559	0.608528	0.0813792	0.407755	0.608528	1.13259
599	119.8	0	2.80129	2.96379	-0.0742583	-0.0234045	1.27408	0.142122	0.206413	4.37101
600	120	0	2.8091	2.98988	-0.080767	-0.166989	1.43661	0.0909603	0.213823	1.43661
601	120.2	0	2.81669	2.95567	-0.0144014	0.147003	0.100192	0.0272779	0.160827	0.238787
602	120.4	0	2.83347	2.99839	-0.0322369	-0.2339	2.61664	0.12386	0.2339	2.61664
603	120.6	0	2.78171	2.92716	0.171578	0.505963	-2.42653	0.201723	0.505963	2.42653
604	120.8	0	2.78872	2.92973	-0.0234943	-0.186812	-4.06557	0.0340634	0.186812	4.06557
605	121	0	2.84292	2.96291	-0.338557	-0.0552334	11.1564	0.338557	0.363648	11.1564
606	121.2	0	2.66942	2.26548	0.655552	4.66336	-0.418903	0.655552	4.66336	7.77616
607	121.4	0	2.57551	1.77568	-0.0846559	1.67818	-44.2069	0.433938	1.67818	44.2069
608	121.6	0	2.58189	1.38758	-0.155859	1.92833	-24.5294	0.155859	1.92833	24.5294
609	121.8	0	2.37926	1.08697	1.6781	0.81263	12.896	1.6781	1.52355	21.6276
610	122	0	2.14329	1.35512	0.646345	-1.63461	32.5016	0.795863	1.63461	32.5016
611	122.2	0	2.28464	1.69385	-0.596252	-1.66138	23.088	0.596252	1.66138	23.088
612	122.4	0	2.29014	1.33375	-0.365995	3.77574	-64.2408	1.03192	3.77574	64.2408
613	122.6	0	2.85703	0.862241	-3.63216	2.0856	-44.6056	3.63216	2.0856	44.6056
614	122.8	0	3.23084	1.03676	-1.1887	-2.48415	49.2803	1.1887	2.48415	49.2803
615	123	1	3.81255	1.98401	-1.46464	-4.77724	185.099	1.46464	4.77724	185.099
616	123.2	1	4.01428	2.10649	-0.547719	-0.890802	42.3329	0.547719	0.890802	42.3329
617	123.4	1	4.09755	2.18533	0.399568	-0.539422	23.4055	0.552914	0.539422	23.4055
618	123.6	1	4.21011	2.46747	0.777782	-1.29487	42.9524	0.777782	1.29487	42.9524
619	123.8	1	4.43161	2.59026	-0.494744	-1.61685	58.6439	0.494744	1.61685	58.6439
620	124	1	4.79461	2.59367	-0.935057	-2.30784	73.8855	1.61207	2.30784	73.8855
621	124.2	1	5.07985	2.43072	-0.406921	-0.238938	2.78117	0.441809	0.238938	5.07043
622	124.4	1	4.98615	2.44854	0.185769	0.658199	-16.861	0.185769	0.658199	16.861
623	124.6	1	4.8555	2.45688	0.0307612	0.331914	-26.6927	0.326108	0.896877	26.6927
624	124.8	1	4.94962	2.47193	-0.031324	-0.651903	5.39622	0.225421	0.651903	5.39622
625	125	1	5.387	2.46429	-0.539589	-2.24258	33.3991	0.539589	2.24258	33.3991
626	125.2	1	5.3686	2.47766	0.311533	0.644327	-9.40605	0.311533	0.644327	9.40605
627	125.4	1	5.19234	2.51871	0.326287	0.764518	-5.28328	0.326287	0.764518	12.247
628	125.6	1	5.0597	2.57878	0.436717	0.553824	23.5988	0.436717	0.577878	23.5988
629	125.8	1	5.22398	2.66915	0.533425	-1.67184	38.6032	0.533425	1.67184	38.6032
630	126	0	5.59968	2.73409	0.451612	-2.50197	39.931	0.451612	2.50197	39.931
631	126.2	0	6.91276	2.53125	0.774652	-6.19096	86.298	0.774652	6.19096	86.298
632	126.4	0	6.76664	2.69023	0.586372	1.56838	-3.19521	0.81988	1.56838	8.97365
633	126.6	0	6.43149	3.01282	0.336853	2.99286	-31.675	1.14761	2.99286	31.675
634	126.8	0	5.00751	3.48335	1.66933	6.18683	-57.0463	1.66933	6.18683	106.181
635	127	0	5.42072	3.55182	0.38711	-3.06865	72.8656	0.38711	3.06865	72.8656
636	127.2	0	5.84273	3.46421	0.172611	-1.35607	72.7803	0.714248	1.35607	72.7803
637	127.4	0	5.43684	3.51328	-1.42331	2.45667	96.0892	1.42331	2.45667	96.0892
638	127.6	0	4.97958	3.72175	-1.0507	2.49716	9.07062	1.05293	2.49716	24.7862
639	127.8	0	4.67342	4.34385	0.471238	3.29056	-36.2108	0.710509	3.29056	36.2108
640	128	0	4.32846	4.70848	0.0667112	2.03306	-29.917	0.249367	2.03306	29.917
641	128.2	0	4.05363	4.55455	-2.22918	-0.19023	6.14034	2.22918	0.907687	10.6289
642	128.4	0	3.80361	4.30154	-0.986282	1.56089	-45.401	1.04161	3.59104	67.0803
643	128.6	0	1.72318	4.71321	-2.22807	12.0968	-116.057	3.6105	12.0968	116.057
644	128.8	0	0.873732	5.03138	0.209025	1.52718	-24.9931	0.209025	1.52718	24.9931
645	129	0	0.703686	5.02748	-0.151238	0.584122	5.32983	0.163576	0.584122	5.32983
646	129.2	0	0.0511932	5.29815	0.262798	2.66807	145.98	1.3713	5.17039	145.98
647	129.4	0	0.130471	5.18481	0	0	0	0	0	0
648	129.6	0	-1.3209	3.78292	-19.5636	3.82249	-24.1796	19.5636	3.82249	24.1796
649	129.8	0	-3.2404	2.5886	-0.0788127	3.0289	-70.1983	0.189926	3.0289	70.1983
650	130	0	-3.88088	2.6318	-0.528507	4.37635	-102.596	0.528507	4.37635	102.596
651	130.2	0	-5.68452	3.62739	6.20339	5.66879	-30.5792	6.20339	8.03667	112.906
652	130.4	0	-4.89552	3.48804	-1.06707	-5.00744	123.372	1.06707	5.00744	123.372
653	130.6	0	-4.55155	3.32193	-0.566762	0.155122	46.4228	0.566762	1.53839	46.4228
654	130.8	0	-6.18959	3.02408	-2.09028	9.10535	-184.177	4.35764	9.10535	184.177
655	131	0	-7.18286	2.92726	0.299666	4.08883	-94.7816	0.534901	4.08883	94.7816
656	131.2	0	-7.04671	2.35353	-4.05863	-0.416435	-19.3866	4.05863	0.416435	19.3866
657	131.4	0	-6.69846	1.6848	-3.67229	1.36217	-23.0514	3.67229	1.36217	23.0514
658	131.6	0	-6.73881	1.65154	1.44364	0.0383594	-1.51277	1.44364	1.65384	20.385
659	131.8	0	-6.0142	2.59838	-0.114297	-8.22967	93.1164	6.27816	8.22967	93.1164
660	132	0	-3.27943	1.23736	-7.68595	-11.1456	223.641	7.68595	11.3383	223.641
661	132.2	0	-2.08338	-0.524708	-2.07382	-14.0997	285.765	2.07382	14.0997	285.765
662	132.4	0	-2.09493	-1.97681	-0.368988	-5.29311	108.835	0.944784	5.29311	108.835
663	132.6	0	-2.22112	-2.44662	-0.420662	-1.22944	33.8195	0.420662	1.22944	33.8195
664	132.8	0	-2.22365	-2.45497	0.593434	0.933453	28.9623	1.43767	1.47639	28.9623
665	133	0	-1.97119	-2.29675	0.003663	-0.0544702	47.2816	1.17183	2.68103	47.2816
666	133.2	0	-2.63079	-2.68968	-0.792746	-3.88153	95.6469	1.0156	3.88153	95.6469
667	133.4	0	-3.32038	-2.85756	-1.13434	-3.71481	128.641	1.13434	3.71481	128.641
668	133.6	0	-4.9392	-2.64345	-0.330978	-8.05965	142.115	1.10765	8.05965	142.115
669	133.8	0	-5.68716	-2.18847	-1.56371	-6.27655	104.582	1.56371	6.27655	104.582
670	134	0	-5.77925	-2.01843	-0.60826	-0.401454	39.134	0.60826	2.17262	39.134
671	134.2	0	-6.15321	-1.62494	0.313873	-4.80166	91.2667	0.332317	4.80166	91.2667
672	134.4	0	-6.48812	0.688948	-0.419853	-12.3564	238.394	3.95529	12.3564	238.394
673	134.6	0	-6.69412	2.4149	5.93727	-10.1975	193.434	5.93727	10.1975	193.434
674	134.8	0	-6.65906	2.4376	2.8322	-5.48812	106.862	3.10507	5.48812	106.862
675	135	0	-6.624	2.4603	-0.27287	-0.778693	20.2889	0.27287	0.778693	20.2889
676	135.2	0	-6.55079	2.47787	0.20612	0.442222	-6.96606	1.00695	0.965827	28.1411
677	135.4	0	-6.91848	2.4129	0.984422	1.0074	-2.95068	0.984422	1.0074	36.1078
678	135.6	0	-6.50918	2.71208	-0.680659	-2.86316	62.057	0.680659	2.86316	62.057
679	135.8	0	-6.24359	3.32192	2.2143	-2.28784	120.125	2.2143	2.28784	120.125
680	136	0	-5.76242	3.39964	-0.34291	-3.06452	86.389	0.401197	3.06452	86.389
681	136.2	0	-5.03381	3.19872	-0.543842	-3.91222	82.6289	0.543842	3.91222	82.6289
682	136.4	0	-4.85827	3.12067	0	0	0	0	0	0
683	136.6	0	-4.85827	3.12067	0	0	0	0	0	0
684	136.8	0	-4.85827	3.12067	0	0	0	0	0	0
685	137	0	-4.85827	3.12067	0	0	0	0	0	0
686	137.2	0	-4.57769	3.35808	1.56415	-0.76951	87.2398	1.74774	1.00419	87.2398
687	137.4	0	-3.65617	1.89101	-2.92243	-10.7152	179.501	2.92243	10.7152	179.501
688	137.6	0	-3.80698	0.624037	-1.88965	-5.14629	103.281	1.88965	5.14629	103.281
689	137.8	0	-4.3478	-0.397803	-2.01719	-5.53313	70.8325	2.01719	5.53313	70.8325
690	138	0	-4.05063	-0.142172	2.55716	3.66141	-108.405	2.55716	3.66141	108.405
691	138.2	0	-3.66833	-0.448972	1.81038	-5.51711	25.034	1.81038	7.021	60.7706
692	138.4	0	-3.78601	-1.87713	-0.855009	-6.02066	66.8734	0.855009	6.02066	66.8734
693	138.6	0	-4.16167	-4.06661	1.02804	-8.9514	59.0055	1.70639	9.05068	59.0055
694	138.8	0	-4.81322	-4.71269	0.716166	-4.30862	170.711	2.3954	4.30862	170.711
695	139	0	-4.78426	-4.87265	0.140402	-0.0456269	25.9537	0.492505	0.955245	25.9537
696	139.2	0	-4.61017	-4.82327	-0.0205911	1.08634	-22.7797	0.0205911	1.08634	22.7797
697	139.4	0	-4.40246	-4.71841	0.0887864	1.0095	-16.8781	0.140018	1.0095	16.8781
698	139.6	0	-4.40519	-4.70673	-0.100212	-0.207273	7.67424	0.167146	0.471413	7.67424
699	139.8	0	-4.44058	-4.71249	-0.110844	-0.312903	5.86454	0.110844	0.312903	5.86454
700	140	0	-4.43473	-4.70739	0.075856	0.380479	-4.81889	0.110167	0.673708	5.45154
701	140.2	0	-4.4509	-4.68949	-0.170126	-0.422956	-2.495	0.170126	0.422956	2.495
702	140.4	0	-4.41681	-4.67735	0.0317841	0.336991	0.616289	0.048659	0.336991	0.616289
703	140.6	0	-4.43033	-4.6727	-0.0541686	-0.142554	1.17509	0.0541686	0.142554	1.17509
704	140.8	0	-4.39254	-4.68036	0.155987	0.301235	-0.75836	0.155987	0.301235	0.75836
705	141	0	-4.40102	-4.67322	-0.103328	-0.214259	-0.698468	0.103328	0.214259	0.83135
706	141.2	0	-4.41689	-4.67781	-0.0068679	0.0211929	-0.0293611	0.048267	0.0482037	0.0598319
707	141.4	0	-4.41895	-4.67491	-0.00252352	0.0223765	0.170383	0.00730108	0.0466364	0.170383
708	141.6	0	-4.41931	-4.67071	-0.0261919	-0.00998835	0.40866	0.0261919	0.00998835	0.40866
709	141.8	0	-4.42201	-4.66794	-0.0246583	-0.00632005	0.391883	0.0246583	0.00632005	0.391883
710	142	0	-4.41029	-4.67539	0.0348907	0.0322591	-0.339565	0.13833	0.0322591	0.387968
711	142.2	0	-4.41469	-4.67014	-0.0134309	-0.000476952	0.156805	0.0134309	0.0237173	0.478594
712	142.4	0	-4.41444	-4.67607	0.016363	-0.0215412	-0.400683	0.0787254	0.0215412	0.400683
713	142.6	0	-4.41753	-4.67616	0.00572419	-0.0115634	0.136058	0.0161845	0.0115634	0.260781
714	142.8	0	-4.41659	-4.67085	-0.0256918	0.027893	-0.189392	0.0256918	0.027893	0.309423
715	143	0	-4.38908	-4.68763	0.072437	-0.109815	-0.999412	0.372522	0.59132	1.58284
716	143.2	0	-4.42956	-4.71422	0.0833464	-0.0322442	0.263005	0.10106	0.156965	0.263005
717	143.4	0	-4.43287	-4.71166	-0.0769325	-0.0245305	-0.157509	0.171793	0.082223	0.26381
718	143.6	0	-4.37064	-4.68384	0.093893	0.476063	0.089776	0.112242	0.476063	1.63535
719	143.8	0	-4.39137	-4.71686	0.0719974	-0.36614	1.26386	0.163423	0.36614	1.26386
720	144	0	-4.38779	-4.70383	0.0262802	-0.0711882	-1.13421	0.176667	0.562137	1.20307
721	144.2	0	-4.42927	-4.69606	-0.175972	0.0152829	-0.294166	0.2181	0.0426293	0.727145
722	144.4	0	-4.42741	-4.70116	0.0108929	-0.0292176	-0.206774	0.0307108	0.0292176	0.25234
723	144.6	0	-4.43561	-4.70231	-0.0140504	-0.0371423	0.00245773	0.0140504	0.0371423	0.00245773
724	144.8	0	-4.4217	-4.70458	0.102975	0.144196	-1.12046	0.117025	0.181338	1.12291
725	145	0	-4.39356	-4.70554	0.027742	0.0334082	0.0791076	0.027742	0.0442002	0.348861
726	145.2	0	-4.39079	-4.70888	0.00864698	0.0121558	-0.0558599	0.0253575	0.0121558	0.168589
727	145.4	0	-4.39083	-4.70035	-0.0586651	0.0193949	0.573266	0.0586651	0.0193949	0.573266
728	145.6	0	-4.3939	-4.70253	0.049666	-0.0338076	-0.425248	0.049666	0.0338076	0.425248
729	145.8	0	-4.39814	-4.70649	0.00594088	-0.011674	-0.112216	0.0793364	0.0327609	0.181832
730	146	0	-4.31901	-4.66313	0.0708486	0.473409	-1.59655	0.240534	0.473409	1.59655
731	146.2	0	-4.30202	-4.67799	0.0232239	0.00312959	-0.399144	0.0426869	0.00523461	0.660526
732	146.4	0	-4.29953	-4.6759	0.00908777	0.022877	-0.0140189	0.0180157	0.022877	0.136171
733	146.6	0	-4.30204	-4.68083	0.0176704	-0.0297927	-0.130496	0.0220327	0.039591	0.228097
734	146.8	0	-4.30991	-4.6473	-0.207741	-0.103169	-0.838951	0.207741	0.506926	0.838951
735	147	0	-4.34916	-4.6657	-0.00834273	-0.0522191	0.187493	0.0790912	0.0851058	0.72694
736	147.2	0	-4.35554	-4.65302	-0.0590593	-0.01195	0.394375	0.0590593	0.0240615	0.394375
737	147.4	0	-4.35949	-4.66138	0.0556005	-0.0591136	-0.80799	0.0556005	0.0614019	0.80799
738	147.6	0	-4.35821	-4.68048	0.080841	-0.0421299	-1.42905	0.080841	0.072954	1.42905
739	147.8	0	-4.33435	-4.66198	0.0380639	0.193653	2.98698	0.247618	0.193653	2.98698
740	148	0	-4.2938	-4.66225	0.0415792	0.180707	1.09017	0.0415792	0.180707	1.09017
741	148.2	0	-4.30216	-4.64859	-0.0686459	-0.0978296	-2.56428	0.149791	0.185619	2.56428
742	148.4	0	-4.35012	-4.66433	-0.0873661	-0.191173	0.0316064	0.0873661	0.191173	0.109908
743	148.6	0	-4.31868	-4.65831	0.130412	0.329284	-0.15371	0.130412	0.329284	0.54779
744	148.8	0	-4.29049	-4.65146	-0.0975191	-0.248177	2.01463	0.210151	0.642806	2.05779
745	149	0	-4.30414	-4.66197	0.0933048	0.162191	0.318862	0.0933048	0.162191	0.318862
746	149.2	0	-4.26033	-4.66286	0.0468731	0.175778	-2.05601	0.289173	0.175778	2.05601
747	149.4	0	-4.31906	-4.6546	-0.144229	-0.320416	1.81428	0.144229	0.320416	2.16312
748	149.6	0	-4.29086	-4.65411	0.128053	0.118095	-0.318576	0.128053	0.438822	1.90938
749	149.8	0	-4.32192	-4.64864	-0.280633	-0.0765092	3.39135	0.280633	0.0765092	3.39135
750	150	0	-4.31883	-4.63946	0.0767613	0.212508	-2.40759	0.352943	0.495065	3.81157
751	150.2	0	-4.2949	-4.66332	0.0669617	-0.20912	0.112129	0.0669617	0.20912	1.99187
752	150.4	0	-4.3464	-4.66517	-0.178768	-0.224828	1.70713	0.178768	0.224828	1.70713
753	150.6	0	-4.30211	-4.65064	0.102968	0.382623	-1.90585	0.102968	0.382623	1.90585
754	150.8	0	-4.29538	-4.66256	0.0450073	-0.0608336	1.52569	0.0932929	0.155289	1.52569
755	151	0	-4.28481	-4.65328	-0.00151791	0.0597257	0.367395	0.00152559	0.0597257	0.367395
756	151.2	0	-4.2827	-4.6499	-0.015126	-0.0253078	0.321583	0.015126	0.0855163	0.321583
757	151.4	0	-4.28243	-4.6488	-0.0479	0.0789687	-2.15096	0.155761	0.109693	2.15096
758	151.6	0	-4.31594	-4.64034	-0.0777463	-0.0671837	0.767769	0.0777463	0.470395	2.3197
759	151.8	0	-4.29086	-4.66257	0.168575	0.0309759	-1.66379	0.168575	0.296045	1.66379
760	152	0	-4.3169	-4.674	-0.0834623	-0.293776	1.90216	0.16862	0.293776	1.90216
761	152.2	0	-4.30342	-4.64843	0.0227988	0.337754	-1.33382	0.113555	0.337754	1.37587
762	152.4	0	-4.28132	-4.63555	-0.0339269	0.00210451	0.149129	0.0339269	0.0747688	0.149129
763	152.6	0	-4.27406	-4.60649	-0.198294	0.137453	1.37491	0.198294	0.137453	1.37491
764	152.8	0	-4.27555	-4.62801	0.17975	-0.0246515	-0.203338	0.189292	0.379306	2.55817
765	153	0	-4.23297	-4.59108	-0.0386658	0.123402	-1.9761	0.0711964	0.370844	1.9761
766	153.2	0	-4.29522	-4.59877	-0.181964	-0.269725	1.26211	0.181964	0.269725	1.26211
767	153.4	0	-4.26906	-4.57308	-0.011085	0.26518	1.34672	0.0528072	0.26518	1.34672
768	153.6	0	-4.25589	-4.58566	0.0873975	-0.0244535	0.836126	0.148499	0.0244535	1.07044
769	153.8	0	-4.25474	-4.58687	0.0190234	-0.0185602	-0.00229148	0.0361378	0.0971028	0.160188
770	154	0	-4.30397	-4.60391	-0.0497203	-0.302257	-0.678747	0.0497203	0.302257	0.678747
771	154.2	0	-4.34956	-4.58158	-0.194143	-0.115092	-1.06104	0.242466	0.115092	1.32225
772	154.4	0	-4.33697	-4.55191	-0.205167	0.201485	1.00753	0.205167	0.201485	2.75923
773	154.6	0	-4.33962	-4.55324	0.149434	0.210642	1.79993	0.149434	0.755298	1.79993
774	154.8	0	-4.30694	-4.53428	-0.0750402	-0.132023	-0.136696	0.0750402	0.175961	0.90028
775	155	0	-4.43886	-4.57929	-0.04099	-0.917612	16.0027	0.29484	0.917612	19.2366
776	155.2	0	-4.97364	-4.6207	-1.17403	-2.46146	39.603	1.17403	2.46146	39.603
777	155.4	0	-5.1637	-4.02109	-3.50499	0.531745	8.1486	3.50499	0.531745	8.1486
778	155.6	0	-5.13554	-3.592	-2.03153	0.822399	-5.87434	2.03153	0.822399	5.87434
779	155.8	0	-4.99807	-3.32624	-0.323828	0.662894	21.271	0.522516	1.25764	31.5795
780	156	0	-5.83337	-3.32114	0.416104	-6.74829	233.448	1.84671	6.74829	233.448
781	156.2	0	-6.67173	-2.38459	-1.13966	-4.34236	89.4775	1.27014	4.34236	89.4775
782	156.4	0	-6.69397	-2.44035	0.343993	1.16123	-7.52829	0.343993	1.16123	7.52829
783	156.6	0	-6.60787	-2.71817	0.577493	1.04645	-4.5153	0.577493	1.04645	5.22339
784	156.8	0	-6.79686	-2.85592	1.48568	-0.515215	43.1007	1.48568	0.60458	43.1007
785	157	0	-6.72356	-2.99379	-0.526344	1.77959	29.6002	0.526344	1.77959	29.6002
786	157.2	0	-6.6311	-3.39123	0.631891	0.672447	41.7766	0.631891	2.80999	41.7766
787	157.4	0	-6.80288	-3.02248	0.331592	-2.19219	35.8536	0.331592	2.19219	35.8536
788	157.6	0	-6.9398	-2.7139	0.451223	-0.720222	12.3625	0.451223	1.35608	13.8718
789	157.8	0	-6.96544	-2.84528	0.108854	0.926017	-54.6503	0.108854	0.926017	54.6503
790	158	0	-6.9614	-2.81661	-0.0164158	-0.0811458	-21.573	0.167409	0.288101	21.573
791	158.2	0	-6.62586	-2.63183	-3.1647	-0.553778	-19.3894	3.1647	0.553778	19.3894
792	158.4	0	-6.29941	-2.64025	-0.500312	1.92513	6.72389	0.543838	2.30525	6.72389
793	158.6	0	-6.21869	-3.22119	0.902935	1.70299	28.9425	0.902935	2.08012	28.9425
794	158.8	0	-6.3264	-3.48081	1.16586	1.44529	26.0212	1.16586	1.44529	26.0212
795	159	0	-6.44827	-3.61478	0.600594	0.259821	37.3902	0.600594	0.602236	37.3902
796	159.2	0	-6.35111	-2.90734	-0.573152	-4.18723	72.9272	0.573152	4.18723	72.9272
797	159.4	0	-5.70403	-1.90797	-1.88841	-8.19607	135.264	1.88841	8.19607	135.264
798	159.6	0	-1.88866	-0.448717	-8.88665	-34.2483	367.93	8.88665	34.2483	367.93
799	159.8	0	-1.76135	-0.539634	-1.121	-1.06335	16.4953	1.121	1.06335	16.4953
800	160	0	-1.65084	-0.663606	-0.037964	0.492958	-21.3003	0.41674	1.05711	21.3003
801	160.2	0	-1.68896	-0.237482	3.35403	0.737996	-130.067	3.35403	6.66756	130.067
802	160.4	0	-0.89734	-0.170048	-4.15407	-7.90299	-11.4834	4.15407	7.90299	11.4834
803	160.6	0	0.0840766	-0.029252	-2.58286	-1.84525	52.5737	2.58286	1.84525	52.5737
804	160.8	0	0.252218	-0.0522865	0	0	0	0	0	0
805	161	0	0.252218	-0.0522865	0	0	0	0	0	0
806	161.2	0	0.762175	-0.270805	-2.22343	-1.58756	-19.1251	2.3369	1.58756	19.1251
807	161.4	0	0.424373	-0.449821	0.506679	1.8486	-85.5292	0.506679	1.8486	85.5292
808	161.6	0	0.424373	-0.449821	0	0	0	0	0	0
809	161.8	0	0.82754	-0.632971	-2.13085	-0.7578	80.8711	2.13085	0.874931	80.8711
810	162	0	0.161207	-1.00144	1.83089	5.28605	-105.731	1.83089	5.28605	105.731
811	162.2	0	-0.139423	-1.07163	0.401563	-1.08324	39.9583	0.401563	1.08324	39.9583
812	162.4	0	0.598521	-0.732984	-1.01756	-6.69834	140.622	1.01756	6.69834	140.622
813	162.6	0	2.9337	-0.643569	-1.78354	-9.65989	205.207	1.78354	9.65989	205.207
814	162.8	0	3.73818	-1.41988	-0.684606	-7.85501	189.472	0.80571	7.85501	189.472
815	163	0	4.17134	-2.18014	-1.7265	-1.69995	58.8816	1.7265	1.69995	58.8816
816	163.2	0	4.17408	-2.16391	1.33221	1.17514	13.1047	1.33221	1.22333	15.1015
817	163.4	0	4.04646	-2.81665	-2.24867	-5.74791	170.365	2.24867	5.74791	170.365
818	163.6	0	3.47052	-3.68265	-0.520867	-5.61303	130.954	0.520867	5.61303	130.954
819	163.8	0	2.80065	-4.36755	0.0291451	-2.99244	42.6294	0.0791868	2.99244	42.6294
820	164	0	2.19142	-4.75292	-0.277328	-3.33542	57.8143	0.277328	3.33542	57.8143
821	164.2	0	2.47689	-4.4804	-1.18549	3.18261	75.7269	1.18549	3.18261	75.7269
822	164.4	0	2.11248	-4.02453	-1.59269	-3.51884	116.156	1.59269	3.51884	116.156
823	164.6	0	1.09781	-3.94642	1.16336	-5.81241	96.9355	1.74989	5.81241	96.9355
824	164.8	0	0.172718	-2.70538	-3.57726	-9.17356	100.453	3.57726	9.17356	100.453
825	165	0	-0.00327797	-1.95129	0.229276	0.148112	8.35741	1.06544	1.11529	25.9933
826	165.2	0	0.723788	-3.14398	5.4967	10.1412	-280.231	5.4967	10.1412	280.231
827	165.4	0	1.36586	-3.81138	0	0	0	0	0	0
828	165.6	0	1.23443	-3.78197	-0.176016	-1.32121	32.9768	0.176016	1.32121	32.9768
829	165.8	0	1.103	-3.75255	-0.352031	-2.64242	65.9536	0.352031	2.64242	65.9536
830	166	0	0.235946	-3.46088	-0.0965138	-6.41603	168.065	0.0965138	6.41603	168.065
831	166.2	0	0.29962	-3.72005	1.29527	1.57572	-3.50968	1.29527	1.57572	3.50968
832	166.4	0	0.35906	-3.94504	0.524187	0.460248	-18.2256	0.579993	1.0466	18.2256
833	166.6	0	0.453334	-4.18797	0.983731	0.490596	45.2269	0.983731	0.859759	45.2269
834	166.8	0	0.435012	-4.47213	0.882237	0.543106	71.0875	1.72151	1.80488	71.0875
835	167	0	0.273492	-3.80595	-0.916311	-4.91338	178.232	0.916311	4.91338	178.232
836	167.2	0	0.758085	-1.61336	0.0719486	-13.7468	244.2	1.83318	13.7468	244.2
837	167.4	0	1.79864	-0.610321	-1.2409	-3.52692	62.4411	3.0171	3.52692	62.4411
838	167.6	0	1.58751	-0.336008	1.07406	1.23333	-26.1395	1.91093	1.70697	26.1395
839	167.8	0	0.52125	-0.978131	1.91558	5.43893	-94.6647	1.91558	5.43893	94.6647
840	168	0	0.365221	-1.00493	0.72592	0.738745	33.4493	0.72592	1.25919	33.4493
841	168.2	0	0.240604	-1.02402	-0.0914617	-0.119722	51.8836	1.33354	0.119722	51.8836
842	168.4	0	0.340066	-1.1822	-0.732893	-0.00983011	62.8822	0.732893	0.657137	62.8822
843	168.6	0	2.01982	-1.4797	-3.90474	-12.5273	280.911	3.90474	12.5273	280.911
844	168.8	0	3.13628	-2.73409	-1.02593	-4.14179	123.173	1.76421	4.14179	123.173
845	169	0	3.26991	-2.84631	-0.136912	-0.876884	2.10477	0.467914	0.876884	2.10477
846	169.2	0	3.35949	-3.03048	0.0193429	-1.2031	16.0314	0.0973596	1.2031	16.0314
847	169.4	0	3.43933	-3.6769	-1.41188	-4.15065	76.5287	1.41188	4.15065	76.5287
848	169.6	0	3.50337	-4.42149	-0.57562	-3.34231	57.0969	0.57562	3.34231	57.0969
849	169.8	0	3.07954	-4.80616	-2.17385	-0.537321	11.8192	2.17385	0.717782	20.3261
850	170	0	2.86136	-5.6929	-0.591322	-7.68589	140.314	0.591322	7.68589	140.314
851	170.2	0	1.79782	-6.77866	-3.05433	-6.05133	139.94	3.05433	6.05133	139.94
852	170.4	0	0.444747	-7.11574	-1.23011	-5.41562	115.038	1.23011	5.41562	115.038
853	170.6	0	0.57136	-7.08727	0.212697	1.278	-29.5121	0.217759	1.278	29.5121
854	170.8	0	0.842994	-7.10015	0.469232	0.0338247	0.519144	0.469232	3.46044	32.8588
855	171	0	1.34108	-7.63927	6.13383	6.02726	40.5496	6.56906	7.66895	40.5496
856	171.2	0	2.73405	-8.27305	2.49059	4.02751	43.3725	2.49059	4.02751	43.3725
857	171.4	0	2.75506	-8.42346	-0.425808	-2.13369	71.0641	0.425808	2.13369	71.0641
858	171.6	0	1.50534	-7.59727	-1.92833	-7.34422	109.995	1.92833	7.34422	109.995
859	171.8	0	0.623457	-6.33854	-1.39838	-6.20413	121.317	1.39838	7.97753	121.317
860	172	0	1.17718	-7.11057	0.150314	7.27475	-52.126	0.193087	7.27475	52.308
861	172.2	0	1.64253	-7.93679	1.027	1.07771	-15.811	1.027	2.93596	18.0294
862	172.4	0	1.2674	-7.5839	-0.376411	-3.39122	46.292	0.626283	3.39122	46.292
863	172.6	0	1.14652	-7.08387	-1.05185	-1.7088	42.982	1.05185	1.7088	42.982
864	172.8	0	1.22876	-7.01877	-0.127543	0.521713	3.71628	0.285003	0.521713	3.71628
865	173	0	1.20235	-7.04125	0.142264	-0.056953	4.54153	0.142264	0.239653	4.54153
866	173.2	0	1.21752	-6.93272	-0.423683	0.00541442	16.5448	0.423683	1.56272	16.5448
867	173.4	0	1.31246	-7.03889	-0.186552	0.426954	1.26252	0.186552	0.426954	1.26252
868	173.6	0	1.5467	-7.11932	-1.38812	1.10379	-10.7492	1.38812	1.10379	10.7492
869	173.8	0	1.95	-7.99979	1.01594	5.23279	-43.0957	1.01594	5.23279	43.0957
870	174	0	2.02627	-8.72107	2.571	4.43787	-42.4103	2.571	4.43787	42.4103
871	174.2	0	1.99422	-9.13932	1.48906	1.26538	33.3845	1.48906	2.29877	68.8708
872	174.4	0	1.97687	-8.43047	-1.76454	-3.63907	81.8682	1.76454	3.63907	81.8682
873	174.6	0	2.17362	-8.31201	-0.657385	1.72383	39.2194	1.69075	4.14726	44.3995
874	174.8	0	1.90955	-9.30408	1.94318	2.69475	-16.5874	1.94318	4.60703	63.1314
875	175	0	1.87832	-8.57107	-0.62269	-4.54376	59.7583	0.62269	4.54376	59.7583
876	175.2	0	1.91157	-8.29723	0.134349	0.0844665	-20.7041	0.174062	0.240438	20.7041
877	175.4	0	1.88672	-8.24758	0.000240535	-0.590912	7.98506	0.181006	0.590912	7.98506
878	175.6	0	1.95187	-7.84895	-0.212894	-2.21275	25.8277	0.212894	2.21275	25.8277
879	175.8	0	2.03835	-7.63193	-0.189749	-0.639904	11.9548	0.594926	0.639904	11.9548
880	176	0	2.00132	-7.65227	0.00709649	0.0778978	-6.95359	0.23905	0.369116	6.95359
881	176.2	0	2.0305	-7.56734	-0.0278544	-0.468035	3.01677	0.0429318	0.468035	3.01677
882	176.4	0	2.02846	-7.47254	0.0445503	-0.432537	6.52402	0.151859	0.432537	6.52402
883	176.6	0	1.98359	-7.41914	0.435714	-0.171325	-8.43461	0.435714	0.171325	8.43461
884	176.8	0	1.97459	-7.39262	-0.0809881	-0.209786	0.0836111	0.112879	0.218454	1.63615
885	177	0	1.97063	-7.28071	0.174716	-0.46101	6.05968	0.174716	0.46101	7.626
886	177.2	0	1.95034	-7.24565	0.131483	-0.264884	1.7548	0.242046	0.268966	1.7548
887	177.4	0	1.98893	-7.1546	-0.195015	-0.392808	4.72345	0.256931	0.392808	4.72345
888	177.6	0	1.99107	-7.10407	0.06182	-0.21937	2.65201	0.115855	0.21937	2.65201
889	177.8	0	1.9735	-7.09164	0.0238868	-0.158027	-2.22075	0.133916	0.389968	2.22075
890	178	0	2.04315	-6.9032	-0.201356	-0.9297	10.231	0.201356	0.9297	10.231
891	178.2	0	2.06626	-6.84828	-0.00836491	-0.207286	-0.203409	0.0609326	0.207286	0.586806
892	178.4	0	2.05625	-6.84358	0.0918801	-0.00815914	-2.47336	0.0918801	0.00815914	2.47336
893	178.6	0	2.0628	-6.86429	-0.0601953	0.0759977	-0.847732	0.112959	0.153763	0.847732
894	178.8	0	2.09312	-6.71965	0.00123602	-0.794786	1.87975	0.077354	0.794786	1.87975
895	179	0	2.04061	-6.8906	0.165004	1.2654	-13.0679	0.186875	1.2654	13.0679
896	179.2	0	2.03021	-6.81609	-0.000318216	-0.670178	8.46558	0.0977537	0.670178	8.46558
897	179.4	0	2.05468	-6.79848	-0.107934	-0.127636	-2.72848	0.107934	0.127636	3.27322
898	179.6	0	2.02507	-6.88842	0.109756	0.343544	-7.35042	0.109756	0.942845	7.35042
899	179.8	0	2.07592	-6.74008	-0.240052	-1.0004	17.9267	0.240052	1.0004	17.9267
900	180	0	2.08193	-6.73551	0.114634	0.539898	-9.01934	0.114634	0.539898	9.01934
901	180.2	0	2.08351	-6.77418	-0.210351	-0.181336	3.12507	0.328496	0.554052	6.79072
902	180.4	0	2.07218	-6.74453	0.266104	0.497022	-6.65178	0.266104	1.28177	9.77508
903	180.6	0	2.11576	-6.66795	-0.140299	-0.866467	8.65863	0.353801	0.866467	8.65863
904	180.8	0	2.12782	-6.66123	-0.126785	0.0421016	-0.60124	0.126785	0.254874	1.61192
905	181	0	2.1226	-6.6978	-0.00161347	0.22419	-0.662738	0.0493934	0.241329	0.662738
906	181.2	0	2.1055	-6.7443	0.0471418	0.167463	-5.75597	0.0670775	0.167463	6.13564
907	181.4	0	2.11292	-6.70973	0.0440298	-0.319364	3.86882	0.132155	0.319364	3.86882
908	181.6	0	2.13572	-6.66562	-0.133617	-0.242425	2.50325	0.133617	0.242425	3.08968
909	181.8	0	2.1554	-6.60932	-0.00164404	-0.117299	0.129489	0.0716909	0.379564	0.166305
910	182	0	2.1741	-6.65835	-0.312727	0.306178	1.86103	0.312727	0.306178	1.86103
911	182.2	0	2.13825	-6.65932	0.163092	0.117563	-3.50227	0.202875	0.193279	3.50227
912	182.4	0	2.12674	-6.66832	0.0736538	-0.0558221	1.82413	0.0736538	0.0746483	1.82413
913	182.6	0	2.17033	-6.61072	-0.212482	-0.206275	3.4106	0.212482	0.538448	3.4106
914	182.8	0	2.17021	-6.54752	0.0775536	-0.485572	-0.879195	0.192783	0.485572	0.879195
915	183	0	2.14125	-6.62061	0.0994315	0.406612	-0.0949396	0.0994315	0.700623	1.85654
916	183.2	0	2.17761	-6.60914	-0.221562	0.0354835	-0.780839	0.221562	0.180219	0.780839
917	183.4	0	2.15058	-6.64214	0.277483	0.174231	0.859964	0.277483	0.174231	5.24178
918	183.6	0	2.15289	-6.61495	-0.112637	-0.227221	-1.29903	0.112637	0.227221	2.15734
919	183.8	0	2.15163	-6.59554	0.0669938	0.0173486	-2.17013	0.089901	0.220762	2.17013
920	184	0	2.13703	-6.66939	0.0466113	0.318613	-5.06941	0.289635	0.318613	5.06941
921	184.2	0	2.16077	-6.62813	-0.212521	-0.407012	5.1291	0.212521	0.407012	5.1291
922	184.4	0	2.18882	-6.60056	-0.141485	0.158035	1.30542	0.188366	0.404322	1.65714
923	184.6	0	2.16552	-6.63087	0.255822	0.0478341	-4.01773	0.255822	0.0478341	4.01773
924	184.8	0	2.17461	-6.59979	-0.0685717	-0.182866	0.619364	0.215646	0.182866	2.58787
925	185	0	2.17049	-6.61029	-0.0550151	0.0948714	0.663397	0.0590777	0.0948714	0.663397
926	185.2	0	2.16635	-6.66646	0.0568924	0.291707	-4.27893	0.176074	0.291707	4.27893
927	185.4	0	2.13785	-6.6601	0.109612	-0.0906689	1.56785	0.109612	0.0906689	1.95053
928	185.6	0	2.14009	-6.63156	-0.033306	-0.191265	1.49967	0.0635989	0.191265	1.73167
929	185.8	0	2.14715	-6.6155	0.0174976	0.129658	3.06037	0.0379458	0.396748	3.06037
930	186	1	2.12592	-6.67993	0.0407804	0.193891	-7.1454	0.0407804	0.219478	7.1454
931	186.2	1	2.15702	-6.65029	-0.121987	-0.208373	3.43185	0.182098	0.208373	3.43185
932	186.4	1	2.16266	-6.63316	-0.132707	0.0196551	2.92676	0.288752	0.237003	4.2503
933	186.6	1	2.14082	-6.6409	0.137971	0.0578364	-5.61661	0.403589	0.19974	5.61661
934	186.8	1	2.1722	-6.59699	-0.0232362	-0.259088	4.36763	0.126555	0.44195	4.36763
935	187	1	2.16796	-6.5745	-0.0497192	-0.174365	2.91841	0.216481	0.174365	3.4357
936	187.2	1	2.24753	-6.77898	-0.656059	1.37859	-14.538	0.656059	1.37859	14.538
937	187.4	1	2.2812	-7.12262	-0.208494	1.81593	-33.8736	0.208494	1.81593	33.8736
938	187.6	1	2.24279	-7.56146	-0.0612671	2.38789	-0.080914	0.81264	2.38789	21.4096
939	187.8	1	2.28872	-7.90007	0.291982	2.07767	-36.3177	0.677354	2.84097	36.3177
940	188	1	2.23038	-8.28016	0.00703379	-0.0167999	-2.94887	0.728512	2.52415	38.1721
941	188.2	1	2.37094	-7.26719	-0.447709	-5.4322	78.827	0.759755	5.4322	78.827
942	188.4	1	2.46136	-6.7226	-0.0708122	-1.82524	19.6564	0.0708122	1.82524	19.6564
943	188.6	1	2.48193	-6.69594	-0.179405	0.116457	-3.36882	0.291763	0.227044	3.36882
944	188.8	1	2.60263	-6.83522	-0.565645	0.740057	-57.7035	0.631719	0.740057	57.7035
945	189	0	2.17564	-7.97861	3.01709	4.813	-136.657	3.51954	5.11912	136.657
946	189.2	0	2.2975	-7.18486	-2.31726	-3.43888	-5.17507	2.31726	3.43888	11.3083
947	189.4	0	2.53102	-7.04857	-2.10677	0.454807	4.16044	2.10677	0.46262	6.36425
948	189.6	0	3.00888	-7.67807	1.07188	5.20546	-12.6227	2.43639	5.20546	14.2093
949	189.8	0	2.99865	-7.35082	-0.845556	-5.35895	165.829	1.1655	5.35895	165.829
950	190	0	4.79521	-5.53654	-12.4305	-19.951	344.871	12.4305	19.951	344.871
951	190.2	0	4.50371	-5.44129	1.98964	1.19744	55.6555	1.98964	1.19744	66.6546
952	190.4	0	3.7832	-5.01855	3.76204	1.54994	-19.3802	3.76204	1.54994	19.3802
953	190.6	0	4.21598	-4.9038	-1.59869	-3.08747	75.2332	1.59869	3.08747	75.2332
954	190.8	0	5.02266	-4.63883	-0.119188	-5.41764	112.481	0.87797	5.41764	112.481
955	191	0	6.46249	-5.17009	-3.04762	-7.72857	131.971	3.04762	7.72857	131.971
956	191.2	0	7.35956	-6.57648	-3.03715	-7.17879	192.483	3.03715	7.17879	192.483
957	191.4	0	7.5939	-7.12093	-0.0928005	-1.62616	55.4151	0.256777	1.62616	55.4151
958	191.6	0	7.70364	-7.382	-0.141608	-1.50978	44.2084	0.940463	1.50978	44.2084
959	191.8	0	7.94267	-7.51067	1.74142	-0.228147	37.603	1.74142	0.74834	37.603
960	192	0	8.2285	-7.26829	1.0038	2.0682	14.5452	1.0038	2.10257	14.5452
961	192.2	0	8.03222	-7.31549	-0.844496	-1.73712	95.2873	0.844496	1.73712	95.2873
962	192.4	0	7.61745	-7.68546	-1.35199	-4.06432	80.6118	1.35199	4.06432	80.6118
963	192.6	0	7.36982	-7.92676	0.0937173	0.412085	16.4279	0.0937173	0.567423	55.3606
964	192.8	0	7.58772	-7.69537	0.171784	-1.48918	55.2068	1.00998	9.57952	111.931
965	193	0	6.81953	-8.63447	0.996252	-3.05927	21.9913	1.38673	3.17279	21.9913
966	193.2	0	6.39096	-8.56724	-1.31041	-1.91451	106.365	1.31041	1.91451	106.365
967	193.4	0	5.45781	-8.2189	-2.57751	-5.68778	75.2326	2.57751	5.68778	75.2326
968	193.6	0	4.7354	-7.71703	-2.39107	-4.75435	96.3339	2.39107	4.75435	99.9702
969	193.8	0	3.33705	-5.89522	-2.81974	-14.121	329.559	2.81974	14.121	329.559
970	194	0	3.22889	-5.00056	0	0	0	0	0	0
971	194.2	0	3.14583	-6.14725	1.04225	6.68692	9.84122	1.38317	6.68692	9.84122
972	194.4	0	2.8764	-6.38325	0.736319	-1.58795	127.094	2.04823	5.23015	127.094
973	194.6	0	2.9975	-6.03891	0.573663	-0.472497	43.5005	0.573663	1.29499	43.5005
974	194.8	0	3.85665	-5.08501	0.0737937	-10.6187	115.137	0.0949363	10.6187	115.137
975	195	0	6.49094	-4.29332	-3.70384	-12.338	123.327	3.70384	12.338	123.327
976	195.2	0	8.51922	-4.3714	-0.419295	-8.84977	57.6745	0.589778	8.84977	57.6745
977	195.4	0	10.0945	-5.16152	-2.14809	-7.36219	106.022	2.52699	7.36219	106.022
978	195.6	0	10.3845	-5.4796	-1.29067	-1.41401	23.6609	1.29067	1.41401	23.6609
979	195.8	0	10.7453	-5.68533	1.31022	-2.81792	184.3	1.31022	2.81792	184.3
980	196	0	10.7419	-7.48154	-1.81719	-10.1289	172.724	1.81719	10.1289	172.724
981	196.2	0	10.1305	-9.44074	1.07093	-12.1331	114.408	1.07093	12.1331	114.408
982	196.4	0	9.59726	-10.4778	1.33525	-1.83738	-43.3077	3.387	1.83738	43.3077
983	196.6	0	10.3563	-10.0451	2.80849	5.18059	-134.107	2.80849	5.18059	134.107
984	196.8	0	10.7683	-9.318	1.51374	2.23405	-49.0128	1.51374	2.23405	49.0128
985	197	0	10.75	-9.49442	-0.514911	-2.19922	60.4863	0.61088	2.19922	60.4863
986	197.2	0	9.75187	-10.8722	-3.2224	-11.9274	248.909	3.2224	11.9274	248.909
987	197.4	0	7.26409	-11.8879	-1.9322	-11.2722	153.14	1.9322	11.2722	153.14
988	197.6	0	5.5347	-12.536	6.44245	-8.65513	120.269	6.44245	8.65513	120.269
989	197.8	0	4.7227	-12.984	0.287819	-1.00465	33.7642	0.846884	1.00465	33.7642
990	198	0	4.15999	-12.5677	-1.68013	-4.02779	93.3824	3.95977	4.02779	93.3824
991	198.2	0	4.05856	-11.7717	-2.04499	-4.44537	57.6805	2.04499	4.44537	57.6805
992	198.4	0	4.0644	-11.6375	-0.39212	-0.102473	42.8566	0.567637	1.77989	42.8566
993	198.6	0	3.93444	-10.4591	-1.40539	-8.49789	133.65	1.40539	8.49789	133.65
994	198.8	0	4.3044	-9.02321	-2.17559	-5.66937	79.2588	2.17559	5.66937	79.2588
995	199	0	4.71175	-8.65179	-1.48602	-2.48614	23.4629	1.48602	2.48614	23.4629
996	199.2	0	5.1829	-8.31608	-1.49401	-1.60871	-1.39506	1.49401	1.60871	20.2564
997	199.4	0	5.56744	-8.17723	-1.69473	-1.55751	-18.2312	1.69473	1.55751	18.2312
998	199.6	0	5.84004	-7.69603	-0.684062	-2.39678	16.6718	0.684062	2.39678	16.6718
999	199.8	0	6.45116	-7.04184	-1.3225	-3.72576	80.4842	1.3225	3.72576	80.4842
1000	200	0	6.4621	-7.04533	-0.0670674	0.0585494	-1.84317	0.0670674	0.101656	1.84317
1001	200.2	0	6.45907	-7.07483	-0.0485936	0.119122	-2.85595	0.0485936	0.119122	2.85595
1002	200.4	0	6.45681	-7.03861	0.135536	-0.303435	-2.12123	0.135536	0.303435	2.12123
1003	200.6	0	6.56723	-6.94748	-0.362983	-0.857835	8.79269	0.362983	0.857835	8.79269
1004	200.8	0	6.61524	-6.92393	-0.0229897	0.047672	6.37122	0.0229897	0.208193	6.37122
1005	201	0	6.64698	-6.9527	-0.220855	0.0765008	-0.108447	0.220855	0.0765008	2.80867
1006	201.2	0	6.66174	-6.93892	-0.0358006	-0.192568	5.17636	0.111134	0.192568	6.50943
1007	201.4	0	6.70925	-6.91807	-0.136125	-0.124655	1.65381	0.136125	0.16417	1.65381
1008	201.6	0	6.73591	-6.89712	-0.0169488	-0.225528	1.64013	0.0359236	0.225528	1.64013
1009	201.8	0	6.75685	-6.89022	-0.0457325	-0.0439524	2.43703	0.0622351	0.0439524	2.43703
1010	202	0	6.76553	-6.87956	-0.00869757	-0.0768748	2.37485	0.00869757	0.0768748	2.37485
1011	202.2	0	6.81347	-6.86804	-0.116342	-0.0300918	5.11754	0.259295	0.591836	5.11754
1012	202.4	0	6.85473	-6.84042	-0.0943978	-0.352156	1.72527	0.157184	0.439493	1.72527
1013	202.6	0	6.8872	-6.81756	-0.102963	-0.258923	2.93853	0.102963	0.258923	2.93853
1014	202.8	0	6.91904	-6.80878	-0.0392224	-0.0880585	3.26814	0.122951	0.0880585	3.84516
1015	203	0	6.97516	-6.78304	-0.185323	-0.388179	6.87546	0.185323	0.388179	6.87546
1016	203.2	0	7.05951	-6.76581	-0.396128	-0.339112	9.33106	0.396128	0.339112	9.33106
1017	203.4	0	6.79396	-7.28445	-0.817236	3.33413	6.09053	0.817236	3.33413	6.10288
1018	203.6	0	6.70704	-7.59296	-0.537231	1.00528	38.909	0.993617	1.00528	38.909
1019	203.8	0	7.19545	-7.40256	-0.310015	-4.56047	227.827	1.04474	4.56047	227.827
1020	204	0	8.30078	-8.10724	-2.97533	-6.90424	130.916	2.97533	6.90424	130.916
1021	204.2	0	8.29527	-8.38315	-0.205279	2.41167	-83.4496	0.205279	2.41167	83.4496
1022	204.4	0	7.43401	-8.70658	-4.16699	6.58296	-302.663	4.16699	6.58296	302.663
1023	204.6	0	7.43401	-8.70658	0	0	0	0	0	0
1024	204.8	0	7.83319	-8.49135	0.438793	-2.40762	8.14577	1.24601	2.40762	8.14577
1025	205	0	7.41282	-8.72994	-0.500211	3.20125	-97.6006	0.711149	3.20125	97.6006
1026	205.2	0	6.99993	-9.37335	-0.835402	3.98425	-78.2499	1.86612	3.98425	78.2499
1027	205.4	0	6.83733	-9.4948	-0.328726	-0.570237	10.0984	0.328726	1.18687	10.0984
1028	205.6	0	7.0023	-9.43915	-0.207777	-0.429956	34.4186	0.207777	0.429956	34.4186
1029	205.8	0	7.08716	-9.48506	-0.412234	-0.129853	16.8227	0.479723	0.129853	16.8227
1030	206	0	7.05436	-9.49121	0.0580786	0.311048	1.2574	0.0580786	0.311048	1.90495
1031	206.2	0	7.10695	-9.49525	-0.337875	-0.695427	8.47381	0.337875	0.695427	8.47381
1032	206.4	0	7.12388	-9.31217	1.02216	-0.582116	16.0986	1.02216	0.582116	16.0986
1033	206.6	0	6.92065	-9.17636	1.30628	0.528667	-3.14717	1.30628	0.705181	4.10953
1034	206.8	0	6.74017	-8.99457	0.805824	0.634278	-9.61412	0.805824	0.634278	9.61412
1035	207	0	6.8242	-9.0265	-0.838201	-1.23677	41.935	0.872252	1.40105	41.935
1036	207.2	0	7.34952	-8.99677	-0.312043	-2.39365	52.8319	0.597757	2.39365	52.8319
1037	207.4	0	7.66234	-8.81476	0.64157	-1.1852	27.9596	0.64157	1.1852	27.9596
1038	207.6	0	6.84545	-8.73294	3.39819	7.55888	-180.386	3.39819	7.55888	180.386
1039	207.8	0	6.31016	-8.89805	-2.41962	0.238566	46.2047	3.61193	4.22215	67.9934
1040	208	0	6.82405	-9.24958	-1.34852	-2.81748	64.9578	1.34852	2.81748	64.9578
1041	208.2	0	7.21097	-9.23946	0.265293	-1.65249	54.5128	1.90621	1.65249	54.5128
1042	208.4	0	7.7014	-9.52473	-3.01434	-1.53727	-67.1595	3.01434	1.53727	67.1595
1043	208.6	0	7.75876	-9.61274	0	0	0	0	0	0
1044	208.8	0	7.92686	-9.48231	0.530131	-2.03329	8.24725	0.530131	2.03329	8.24725
1045	209	0	7.82176	-9.96373	-2.10154	2.62264	28.9162	3.11925	2.62264	28.9162
1046	209.2	0	7.4755	-9.85756	0.54449	1.55163	-10.7806	1.3627	1.55163	10.7806
1047	209.4	0	7.69751	-9.86879	-0.480513	-1.9936	34.1873	0.855059	1.9936	34.1873
1048	209.6	0	7.12359	-10.0791	0.532381	4.93002	-48.9862	1.32672	4.93002	48.9862
1049	209.8	0	6.64432	-10.1434	-0.0481518	1.31077	-33.222	0.455679	1.31077	33.222
1050	210	0	6.35462	-10.3975	-0.34031	2.40596	-32.6651	0.34031	2.40596	32.6651
1051	210.2	0	6.16394	-10.5419	0.0518605	0.553487	-32.8032	0.0639392	0.553487	32.8032
1052	210.4	0	5.96635	-10.7335	0.125486	1.42742	-15.976	0.518361	1.42742	15.976
1053	210.6	0	5.89338	-10.7011	0.161942	-0.593045	10.4102	0.354588	1.14927	15.8834
1054	210.8	0	5.80068	-10.7435	0.270896	1.00117	-17.4676	0.270896	1.00117	17.4676
1055	211	0	5.62136	-10.7766	0.58122	0.72695	-18.4323	0.58122	0.72695	18.4323
1056	211.2	0	5.50869	-10.8184	0.249789	0.506096	-7.56566	0.249789	0.506096	7.56566
1057	211.4	0	5.64741	-10.8937	-0.934753	-0.329488	3.35738	0.934753	0.329488	5.05558
1058	211.6	0	5.55272	-11.0649	0.211452	1.49059	-33.8993	0.625288	1.49059	33.8993
1059	211.8	0	5.26187	-11.2068	0.873356	1.09634	-26.6598	0.873356	1.09634	26.6598
1060	212	0	4.95126	-11.4449	0.670638	1.76832	-18.2628	0.670638	1.76832	18.2628
1061	212.2	0	4.79297	-11.3733	0.811078	-0.414028	48.8935	1.12068	0.414028	48.8935
1062	212.4	0	4.30624	-11.8277	1.63996	4.03289	-89.8888	1.63996	4.03289	89.8888
1063	212.6	0	4.00023	-12.1422	0.649608	1.11311	-26.1912	0.892687	1.11336	31.122
1064	212.8	0	4.12971	-12.1024	-0.449025	-0.095512	13.4444	0.77104	0.994045	34.6754
1065	213	0	4.10269	-12.5918	-0.176696	2.58512	-36.1986	0.923854	2.58512	36.1986
1066	213.2	0	3.91744	-12.9498	0.608698	1.37408	-30.8758	0.703459	1.48802	30.8758
1067	213.4	0	4.03271	-12.8607	-0.892869	-0.341354	32.0558	0.892869	0.6556	32.0558
1068	213.6	0	4.05306	-12.8262	0.481882	-0.0282016	2.44209	0.481882	0.856219	16.3406
1069	213.8	0	4.0158	-12.8493	0.0822455	-0.0199196	-0.179787	0.472844	0.229309	5.12041
1070	214	0	4.0138	-12.6457	-0.144768	-1.36645	22.5256	0.402903	1.36645	22.5256
1071	214.2	0	4.62442	-11.9781	-3.25937	-7.64599	197.767	3.25937	7.64599	197.767
1072	214.4	0	4.9858	-11.6242	-0.187376	-3.29092	84.9536	0.852852	3.29092	84.9536
1073	214.6	0	5.42486	-11.2543	-0.161351	-1.70915	22.4949	0.51005	2.90992	43.5452
1074	214.8	0	4.91106	-11.4408	1.22484	3.04369	-54.8215	1.22484	3.04369	54.8215
1075	215	0	4.37938	-11.7651	1.15726	3.38278	-71.2834	1.15726	3.38278	71.2834
1076	215.2	0	4.19582	-11.908	0.0826663	-0.48484	10.9178	0.0826663	0.489757	10.9178
1077	215.4	0	4.28541	-11.6799	0.219723	-1.58277	21.5321	0.219723	1.58277	21.5321
1078	215.6	0	4.17722	-11.7287	0.505383	1.33254	-24.1401	0.505383	1.33254	24.1401
1079	215.8	0	4.21291	-11.5248	0.108474	-1.30156	26.4122	0.167094	1.30156	26.4122
1080	216	0	3.93078	-12.0849	0.0816932	3.2364	-63.5755	0.308891	3.2364	63.5755
1081	216.2	0	3.98214	-12.02	-0.416554	-0.707701	19.996	0.422342	0.707701	19.996
1082	216.4	0	4.10622	-11.8564	-0.096897	-0.91325	16.7308	0.285911	0.91325	16.7308
1083	216.6	0	4.04238	-12.0741	0.090305	1.95943	-38.5021	0.531358	1.95943	38.5021
1084	216.8	0	3.93658	-12.2412	-0.343764	-0.183017	20.3483	1.19461	1.66856	51.246
1085	217	0	4.38317	-11.8442	-0.506054	-2.90878	78.0562	0.845314	2.90878	78.0562
1086	217.2	0	4.02558	-12.0943	0.768201	2.84621	-68.3678	0.768201	2.84621	68.3678
1087	217.4	0	4.0915	-11.9965	-0.255968	-1.23791	24.6391	0.473071	1.23791	24.6391
1088	217.6	0	4.12292	-11.9909	0.141791	0.265307	-8.64795	0.210034	0.667608	8.64795
1089	217.8	0	4.12963	-11.9278	-0.056813	-0.41935	11.8069	0.347429	0.507245	11.8069
1090	218	0	4.38136	-11.7397	-0.347211	-1.96114	46.0533	0.437374	1.96114	46.0533
1091	218.2	0	4.48504	-11.601	0.0877712	-0.0841803	7.19156	0.236067	0.227772	7.19156
1092	218.4	0	4.3464	-11.6631	0.520913	1.01242	-28.3044	0.55046	1.01242	28.3044
1093	218.6	0	4.20435	-11.7249	0.161249	0.242038	-1.62351	0.161249	0.439949	9.76676
1094	218.8	0	4.41282	-11.4531	0.114899	-1.0848	19.5838	0.313208	3.31129	55.6461
1095	219	0	4.61431	-11.2015	0.199863	-2.15419	48.8806	0.210262	2.15419	48.8806
1096	219.2	0	4.61145	-11.1906	-0.169739	-0.0638244	-0.951113	0.300674	0.168002	1.58089
1097	219.4	0	4.76334	-11.0548	0.0839917	-1.77934	12.912	0.46165	1.77934	12.912
1098	219.6	0	4.69124	-11.0245	0.535642	1.59857	-9.66105	0.535642	1.59857	9.66105
1099	219.8	0	4.81827	-10.8417	0.504786	-2.25123	25.8651	0.627481	2.25123	25.8651
1100	220	0	4.79551	-10.4822	1.23975	-0.794604	10.265	1.23975	1.26124	17.0479
1101	220.2	0	4.85727	-10.3597	0.366713	-0.259035	2.2955	0.366713	0.524846	2.2955
1102	220.4	0	4.84456	-10.3356	0.0727116	0.352686	-0.825325	0.203503	0.352686	0.825325
1103	220.6	0	5.04628	-10.2581	-0.0354435	-1.06414	9.78602	0.479593	1.66557	9.78602
1104	220.8	0	4.98871	-10.2501	0.152313	-0.00490344	3.15786	0.201873	0.327306	3.15786
1105	221	0	5.12599	-10.178	-0.0847313	-0.817133	4.08245	0.146898	0.817133	4.08245
1106	221.2	0	5.12288	-10.1546	0.202575	0.376351	-4.19893	0.22858	0.75586	9.53048
1107	221.4	0	4.96961	-10.1717	0.0357539	-0.026809	-15.4535	0.596931	1.7683	15.4535
1108	221.6	0	5.34947	-9.93903	0.547478	-2.96549	47.9969	0.613165	2.96549	47.9969
1109	221.8	0	6.04034	-9.82159	-1.42794	-3.10153	29.1669	1.42794	3.10153	29.1669
1110	222	0	6.87154	-9.37772	1.59001	-3.91965	-24.4942	1.59001	3.91965	37.52
1111	222.2	0	6.36073	-9.45649	1.07248	5.46189	-74.6324	1.07248	5.46189	74.6324
1112	222.4	0	6.46567	-9.48123	-0.453625	-0.488819	4.77148	0.453625	0.488819	4.77148
1113	222.6	0	6.50974	-9.7126	-1.78244	1.0185	-23.6407	1.78244	1.17813	23.6407
1114	222.8	0	6.40536	-10.1863	-1.1675	1.80542	-33.5847	1.1675	1.80542	33.5847
1115	223	0	6.16017	-10.5158	0.108956	2.62209	-121.437	0.227501	2.62209	121.437
1116	223.2	0	4.56502	-10.3756	4.92618	-5.39384	-167.683	8.65592	15.6966	167.683
1117	223.4	0	5.08379	-9.65707	-2.60465	2.28987	2.97933	2.60465	2.28987	13.9204
1118	223.6	0	5.43037	-9.39201	-1.75318	-1.94853	-0.818017	1.75318	1.94853	1.89976
1119	223.8	0	5.06705	-10.2258	4.52947	6.07559	-88.8527	4.52947	6.07559	88.8527
1120	224	0	5.07506	-10.8486	0.34459	1.81613	22.2195	0.34459	1.81613	22.2195
1121	224.2	0	5.09331	-11.1149	1.06997	2.41262	-44.626	1.06997	2.41262	44.626
1122	224.4	0	5.30549	-11.7827	0.272593	2.04393	-26.6122	0.723914	2.55926	45.8701
1123	224.6	0	5.30641	-11.6421	-0.509693	-0.50246	12.7636	0.509693	0.50246	12.7636
1124	224.8	0	5.86132	-12.0739	-0.106706	4.3037	-158.628	1.32199	4.3037	158.628
1125	225	0	6.8521	-12.5643	0.160878	4.95645	-10.2486	0.160878	4.95645	52.895
1126	225.2	0	7.26632	-12.9174	1.06437	3.07505	-61.9316	1.50823	3.07505	61.9316
1127	225.4	0	7.31914	-13.1665	1.50099	-1.30503	70.2881	1.50099	2.15468	70.2881
1128	225.6	0	7.32449	-12.7712	-2.49638	-0.579651	75.4262	2.49638	1.54665	75.4262
1129	225.8	0	7.38608	-12.8476	0.886405	1.42247	25.5526	0.886405	1.42247	25.5526
1130	226	0	7.15832	-13.7306	4.00683	2.42991	12.3042	4.00683	2.42991	12.3042
1131	226.2	0	7.24949	-13.9802	0.201295	0.578011	10.0154	0.201295	0.578011	10.0154
1132	226.4	0	7.24949	-13.9802	0	0	0	0	0	0
1133	226.6	0	7.24949	-13.9802	0	0	0	0	0	0
1134	226.8	0	7.8784	-13.7447	-4.1215	1.45426	31.0894	4.1215	1.45426	31.0894
1135	227	0	8.51764	-14.4203	2.17077	5.96334	-132.352	2.17077	5.96334	132.352
1136	227.2	0	9.79904	-15.7735	5.0852	9.08331	-142.35	5.0852	9.08331	142.35
1137	227.4	0	10.1652	-15.8917	-1.43716	-2.42593	117.024	1.43716	3.0266	117.024
1138	227.6	0	8.84854	-14.3541	-2.76318	-11.2599	168.607	2.76318	11.2599	168.607
1139	227.8	0	8.53235	-13.7195	-0.381411	-0.693874	70.0319	0.381411	0.693874	70.0319
1140	228	0	8.50948	-13.8471	0.896131	1.50301	-27.8142	0.896131	1.50301	27.8142
1141	228.2	0	8.50948	-13.8471	0	0	0	0	0	0
1142	228.4	0	8.76	-14.0777	-1.0293	1.32788	5.22541	1.0293	2.2303	52.0845
1143	228.6	0	8.85238	-12.9178	0.13732	-5.00702	152.022	4.69702	5.00702	152.022
1144	228.8	0	8.92885	-12.7033	-2.72411	-1.88996	-11.0329	2.72411	1.88996	11.0329
1145	229	0	9.08802	-12.8781	1.36042	2.04685	-88.2634	1.76443	2.04685	88.2634
1146	229.2	0	8.96306	-12.8207	-0.509617	-1.69223	27.4023	0.509617	1.69223	31.3872
1147	229.4	0	8.99883	-12.7069	-0.0122993	0.45507	0.140692	0.0927701	0.51616	11.3551
1148	229.6	0	8.96835	-12.7905	0.156064	0.109206	-6.43732	0.201962	0.28413	6.43732
1149	229.8	0	8.96558	-12.7461	-0.0335569	-0.148117	4.46903	0.0978017	0.259418	4.46903
1150	230	0	8.97714	-12.7701	-0.00671387	0.281815	0.241879	0.0286082	0.461441	5.85932
1151	230.2	0	9.07643	-13.2188	-0.524185	4.13806	-3.19531	0.524185	4.13806	3.19531
1152	230.4	0	9.08902	-13.7026	-0.159364	1.55067	21.2804	1.48339	4.80076	33.5097
1153	230.6	0	9.3565	-13.6025	-0.885588	0.563431	52.268	1.4033	0.563431	52.268
1154	230.8	0	9.17173	-13.735	0.727283	0.52374	-4.64092	0.727283	0.573786	4.64092
1155	231	0	9.07653	-13.6694	0.74651	-0.184599	-2.21789	0.74651	0.443792	7.04975
1156	231.2	0	8.64204	-13.943	2.87836	2.29335	16.7394	2.87836	2.29335	16.7394
1157	231.4	0	8.33686	-14.1297	0.0840594	0.949085	37.3102	0.106238	0.949085	37.3102
1158	231.6	0	8.42315	-14.3026	-0.856681	-0.0208234	32.6082	0.856681	0.795552	32.6082
1159	231.8	0	9.11551	-13.917	-2.69769	-5.02035	60.7392	2.69769	5.02035	60.7392
1160	232	0	10.5331	-13.245	-2.23889	-5.51375	98.926	2.40421	5.51375	98.926
1161	232.2	0	11.9022	-12.7784	-0.263245	-7.96093	144.776	0.263245	7.96093	144.776
1162	232.4	0	12.311	-12.8628	-0.446251	-1.81551	54.7913	0.446251	1.81551	54.7913
1163	232.6	0	12.8423	-12.9907	-0.515094	-2.37698	45.8046	0.973025	2.37698	45.8046
1164	232.8	0	13.3474	-13.2977	-0.0107521	-2.72419	20.4822	1.02332	2.72419	25.0097
1165	233	0	13.2573	-13.2052	-0.10366	1.2461	-19.914	0.479379	1.2461	19.914
1166	233.2	0	13.0666	-13.0963	0.21086	0.927001	-16.1986	0.94614	0.927001	16.1986
1167	233.4	0	13.3385	-12.967	0.968255	-1.6191	-3.54541	1.52181	1.6191	6.85615
1168	233.6	0	13.6917	-13.2571	-1.05636	-2.37963	20.4688	1.05636	2.37963	20.4688
1169	233.8	0	13.9607	-13.4541	-0.135323	-1.03332	26.0642	0.737694	1.03332	26.0642
1170	234	0	13.9691	-13.2843	0.896208	0.604101	12.7989	0.896208	0.604101	12.7989
1171	234.2	0	14.0094	-13.0847	1.41635	0.124456	32.6661	1.41635	0.124456	32.6661
1172	234.4	0	13.8984	-13.0058	0.132444	1.3393	13.9842	0.132444	1.3393	13.9842
1173	234.6	0	13.8919	-13.22	-1.35179	-2.2244	45.5609	1.35179	2.2244	45.5609
1174	234.8	0	14.0972	-13.9886	-2.30086	-3.75496	119.02	2.30086	3.75496	119.02
1175	235	0	14.1315	-14.5619	-0.444664	-1.44507	56.8377	0.444664	1.44507	56.8377
1176	235.2	0	14.3018	-14.4763	1.61096	0.198049	-29.3508	1.61096	0.57601	29.3508
1177	235.4	0	14.2778	-14.0439	0.136953	2.78079	-13.5454	0.136953	2.78079	25.0312
1178	235.6	0	14.5783	-13.1373	4.21056	5.00562	60.5853	4.21056	5.00562	60.5853
1179	235.8	0	14.7256	-12.8829	-0.955551	-1.55131	23.4423	0.955551	1.97729	23.4423
1180	236	0	14.7187	-13.4368	0.505039	-2.1209	85.2217	0.511723	2.1209	85.2217
1181	236.2	0	14.7532	-13.5478	0.0495493	-0.38938	22.8473	0.159491	0.38938	22.8473
1182	236.4	0	14.7165	-13.732	0.119842	-0.99516	8.67701	0.214346	0.99516	8.67701
1183	236.6	0	14.6683	-14.3609	0.304349	-3.37363	-10.623	1.34614	3.37363	18.6698
1184	236.8	0	13.4494	-15.2473	-3.84239	-7.08276	152.437	3.84239	7.08276	152.437
1185	237	0	11.9888	-15.4438	-4.89279	-8.90591	79.3491	4.89279	8.90591	79.3491
1186	237.2	0	10.4125	-15.3326	-3.04056	-4.98207	82.6447	3.04056	4.98207	82.6447
1187	237.4	0	9.11617	-15.1969	-0.656555	-6.03853	93.1771	0.677719	6.03853	93.1771
1188	237.6	0	8.14394	-15.0189	0.495499	-4.79564	22.6747	0.495499	4.79564	24.8794
1189	237.8	0	7.8534	-15.0014	0	0	0	0	0	0
1190	238	0	7.8534	-15.0014	0	0	0	0	0	0
1191	238.2	0	7.8534	-15.0014	0	0	0	0	0	0
1192	238.4	0	7.8534	-15.0014	0	0	0	0	0	0
1193	238.6	0	7.8534	-15.0014	0	0	0	0	0	0
1194	238.8	0	9.75917	-16.0503	2.90585	10.3769	-32.8996	3.50954	10.3769	32.8996
1195	239	0	10.4225	-15.2334	-4.68052	0.107257	108.129	4.68052	8.41386	108.129
1196	239.2	0	10.0814	-14.96	0	0	0	0	0	0
1197	239.4	0	10.0814	-14.96	0	0	0	0	0	0
1198	239.6	0	10.0814	-14.96	0	0	0	0	0	0
1199	239.8	0	9.973	-14.6468	-2.0203	-2.57968	45.7826	2.0203	2.57968	45.7826
1200	240	0	9.86461	-14.3336	0	0	0	0	0	0
1201	240.2	0	10.0355	-15.0657	4.83346	5.63691	-12.1464	4.83346	5.63691	12.1464
1202	240.4	0	10.3111	-15.9548	0.506272	1.08283	-4.85463	0.506272	1.08283	9.3926
1203	240.6	0	9.71785	-15.9715	2.57786	-3.75437	99.7449	2.57786	3.75437	99.7449
1204	240.8	0	9.2692	-15.294	-0.78208	-4.1224	78.782	0.78208	4.1224	78.782
1205	241	0	9.52204	-14.4687	-2.19595	-2.88718	116.132	2.19595	2.88718	116.132
1206	241.2	0	9.79238	-14.0771	-0.985434	-1.79056	68.8077	0.985434	1.79056	68.8077
1207	241.4	0	9.82889	-14.0063	0.127983	-0.0177503	-16.0533	0.226112	1.109	16.0533
1208	241.6	0	9.86509	-13.8929	-0.241093	-1.44232	17.5221	0.304095	1.44232	17.5221
1209	241.8	0	9.87127	-13.7919	0.225687	0.0503862	4.2371	0.312057	0.247661	4.2371
1210	242	0	9.9191	-13.7127	-0.152754	-0.742987	1.71866	0.15749	0.742987	2.00737
1211	242.2	0	10.0238	-13.5161	-0.11835	-0.920028	11.2726	0.11835	0.920028	11.2726
1212	242.4	0	10.0768	-13.4259	-0.0547178	-0.506042	5.98038	0.0547178	0.506042	5.98038
1213	242.6	0	10.0846	-13.379	0.0938577	-0.0951871	1.51643	0.0938577	0.0951871	2.96488
1214	242.8	0	10.085	-13.3599	0.0165393	-0.150244	-2.11542	0.039859	0.265229	2.13902
1215	243	0	10.0969	-13.3278	-0.0398582	-0.110569	-0.15913	0.0880318	0.110569	0.159271
1216	243.2	0	10.0676	-13.2408	0.606771	-0.366369	13.7412	0.606771	0.366369	13.7412
1217	243.4	0	10.0232	-13.1518	0.382568	-0.389452	103.9	0.443225	0.42992	103.9
1218	243.6	0	10.9528	-12.5755	-0.522235	-7.64213	101.118	0.522235	7.64213	101.118
1219	243.8	0	11.3862	-12.3628	0	0	0	0	0	0
1220	244	0	11.8909	-12.6047	-2.79806	-2.26861	79.0557	2.79806	2.26861	79.0557
1221	244.2	0	11.7712	-12.8315	0.0246979	0.288228	84.8044	0.266763	2.77846	88.3265
1222	244.4	0	12.3978	-13.1946	-1.18706	-3.12055	96.7768	1.18706	3.12055	96.7768
1223	244.6	0	12.6718	-13.9006	-1.98564	-4.97771	132.723	1.98564	4.97771	132.723
1224	244.8	0	12.8058	-14.3024	-0.0398064	0.372931	8.48897	0.610888	1.7742	21.0693
1225	245	0	12.6327	-13.7445	0.907436	2.69384	-56.2141	0.907436	2.69384	56.2141
1226	245.2	0	12.4999	-13.5807	0.00199569	0.835187	-20.3734	0.180636	0.835187	20.3734
1227	245.4	0	12.4692	-13.5953	-0.251221	-0.0957386	14.8408	0.251221	0.605339	14.8408
1228	245.6	0	12.3811	-13.49	0.0275107	0.334405	-10.4498	0.327742	1.19627	10.4498
1229	245.8	0	12.4783	-13.6363	-0.140146	-0.694127	0.987129	0.140146	0.694127	3.7078
1230	246	0	12.4066	-13.5752	0.0457133	0.608712	9.42011	0.185635	0.608712	9.42011
1231	246.2	0	12.0822	-13.5499	-2.17642	2.10572	-14.4343	2.19005	2.10572	14.4343
1232	246.4	0	11.6024	-13.4528	-0.347813	2.20972	-8.61411	0.347813	2.20972	8.61411
1233	246.6	0	11.3717	-13.4304	-0.689204	1.04479	7.35296	0.689204	1.04479	7.35296
1234	246.8	0	10.8394	-13.1472	-0.720244	4.49604	-0.497741	1.07733	4.49604	13.4555
1235	247	0	10.0733	-12.4309	-0.713252	4.00135	5.31569	1.70391	4.00135	12.9905
1236	247.2	0	9.841	-12.7547	-1.76462	-1.66009	50.1309	1.76462	1.66009	50.1309
1237	247.4	0	9.74177	-13.0711	-1.14803	-0.701491	39.1649	1.14803	0.87741	39.1649
1238	247.6	0	9.62509	-13.4488	-1.36311	-1.42113	40.0946	1.36311	1.42113	40.0946
1239	247.8	0	9.60415	-13.0751	1.33467	3.32507	-8.08128	1.33467	3.32507	8.08128
1240	248	0	9.58022	-13.2472	-0.947491	-3.14764	48.6822	0.947491	3.14764	48.6822
1241	248.2	0	9.4764	-14.1514	-1.15545	-4.82511	98.7892	1.15545	4.82511	98.7892
1242	248.4	0	9.3213	-14.5156	-0.453972	-0.146879	62.2693	0.453972	0.698716	62.2693
1243	248.6	0	9.28376	-14.4014	-0.287261	1.08467	-24.9019	0.287261	1.9645	49.2067
1244	248.8	0	9.20306	-13.4921	-1.9114	6.02039	-72.3002	1.9114	6.02039	72.3002

## Sheet: fly2
	time	stimulus	x	y	Vx	Vy	Vz	Sx	Sy	Sz				Vx	Vy	Vz	Sx	Sy	Sz
0	0	0	0	0	-3.92055	-1.78235	178.027	3.92055	1.78235	178.027		Stim1	Before	0.0665361	0.0172424	-1.73529	0.550719	0.145537	10.9182
1	0.2	0	0.558072	-0.196285	1.82242	4.80043	-45.5201	5.18539	4.80043	89.5065			After	0.310932	2.69642	-21.5829	2.14149	2.84498	40.8215
2	0.4	0	1.45874	-1.2634	2.38476	2.9647	-25.6046	2.38476	2.9647	30.8131
3	0.6	0	1.67271	-1.25772	-0.689698	0.42794	17.1851	0.689698	0.583137	17.1851		Stim2	Before	-0.0869151	-0.00812093	1.88115	0.503285	0.152201	9.75011
4	0.8	0	1.6328	-0.765474	-3.60552	-1.12748	73.8607	3.60552	1.12748	73.8607			After	0.128881	1.674	-17.1706	1.81058	2.47828	43.7884
5	1	0	2.13045	-0.617692	-2.08006	2.37029	77.2968	2.08006	2.37029	77.2968
6	1.2	0	2.89677	-0.585786	-1.78924	3.47008	37.5181	1.78924	3.47008	37.5181		Stim3	Before	-0.0434296	-0.0164543	1.26216	0.281507	0.137695	5.39013
7	1.4	0	3.23388	-0.825779	0.438316	0.77113	14.2058	0.799678	0.77113	14.2058			After	-0.49922	0.590309	4.69518	2.64263	2.22675	60.9853
8	1.6	0	3.86431	-0.978484	-4.09928	3.78521	114.166	4.09928	3.78521	114.166
9	1.8	0	4.47172	-1.332	-2.05022	4.31132	52.8253	2.05022	4.31132	52.8253		Average	Before	-0.0212695	-0.00244428	0.46934	0.44517	0.145144	8.68614
10	2	0	5.11344	-1.60974	-2.19058	0.438318	44.5342	2.19058	0.438318	44.5342			After	-0.0198023	1.65358	-11.3528	2.19823	2.51667	48.5317
11	2.2	0	5.22792	-1.67146	0.222155	0.804037	18.8951	1.28741	1.4113	18.8951
12	2.4	0	5.06793	-1.93213	0.84764	1.0593	5.95595	0.84764	1.0593	5.95595
13	2.6	0	5.0651	-1.98219	-0.0349347	0.365959	5.60847	0.210281	0.365959	5.60847
14	2.8	0	4.87903	-2.55651	0.807266	2.8815	41.7019	1.19298	2.8815	41.7019
15	3	0	5.1482	-2.73627	-1.70775	0.138092	38.6507	1.70775	0.138649	38.6507
16	3.2	0	5.37852	-2.89629	-1.23231	0.716759	27.9916	1.23231	0.716759	27.9916
17	3.4	0	5.7576	-3.23893	-3.00944	0.772904	46.602	3.00944	0.772904	46.602
18	3.6	0	6.26983	-3.38992	-1.26682	-0.341698	-28.922	1.8063	1.04474	28.922
19	3.8	0	5.96134	-3.62392	0.953834	1.80522	-45.9221	0.953834	1.80522	45.9221
20	4	0	5.74414	-3.79896	0.755206	0.0596835	-42.7835	0.755206	1.30073	42.7835
21	4.2	0	5.65765	-3.55819	0.549902	-1.48146	-38.3229	0.549902	1.48146	38.3229
22	4.4	0	5.57783	-3.31274	0.563956	-1.3271	-27.0779	0.636921	1.3271	27.0779
23	4.6	0	5.41402	-3.13121	0.324143	-1.10865	-6.18257	0.324143	1.10865	6.18257
24	4.8	0	5.82476	-2.30532	-2.6403	-2.91345	-8.06574	2.6403	2.91345	8.06574
25	5	0	5.67994	-2.4622	2.02983	1.05775	-89.0745	2.02983	1.05775	89.0745
26	5.2	0	5.47588	-2.77528	1.95181	0.879152	-51.5648	1.95181	0.879152	51.5648
27	5.4	0	5.23551	-3.04964	1.29715	0.572088	-30.5878	1.29715	0.572088	30.5878
28	5.6	0	5.6345	-2.98363	-2.3984	0.468023	12.7667	2.3984	1.1609	12.7667
29	5.8	0	5.63263	-2.79704	0.163998	-0.967266	-16.0192	0.163998	0.967266	16.0192
30	6	0	5.39479	-2.30305	-1.61137	-3.77485	-33.0858	1.85907	3.77485	33.0858
31	6.2	0	5.35867	-1.65497	-1.15571	-0.396519	12.6761	1.15571	1.27957	12.6761
32	6.4	0	5.4846	-1.8603	0.346604	0.943242	19.9328	0.346604	0.943242	19.9328
33	6.6	0	5.52782	-2.09796	0.924735	1.64588	20.3005	0.924735	1.64588	20.3005
34	6.8	0	5.47805	-2.63657	2.64147	2.15034	-50.7109	2.64147	2.15034	50.7109
35	7	0	5.16696	-3.00086	0.300545	-0.881211	13.8362	3.84298	0.881211	43.3608
36	7.2	0	5.5822	-2.95333	-0.326865	2.49446	19.8534	1.86708	2.49446	48.1059
37	7.4	0	5.5489	-3.2355	1.0228	-0.228405	-5.926	1.0228	0.228405	5.926
38	7.6	0	5.47259	-3.24287	0.27848	-0.299918	-3.75275	0.27848	0.299918	3.76357
39	7.8	0	5.48569	-3.27494	0.238047	0.218174	0.329578	0.538456	0.31707	4.4689
40	8	0	5.47391	-2.88251	-1.45523	-1.60011	0.79347	1.45523	1.60011	28.1172
41	8.2	0	5.26021	-3.37833	3.07119	0.973832	-98.6183	3.07119	0.973832	98.6183
42	8.4	0	5.17882	-3.72043	1.9628	0.329846	-57.3037	1.9628	0.329846	57.3037
43	8.6	0	4.55478	-3.56377	-0.278378	-4.52724	-38.1446	0.842128	4.52724	38.1446
44	8.8	0	3.84661	-3.58756	2.21004	-1.11514	-82.0088	2.58362	3.05394	82.0088
45	9	0	4.31517	-4.00603	1.76863	1.92159	-62.1452	1.76863	1.92159	62.1452
46	9.2	0	6.57127	-4.31763	12.6317	13.5204	-268.794	12.6317	13.5204	268.794
47	9.4	0	6.61969	-4.48401	0.584157	-0.492	-30.1684	0.584157	0.492	30.1684
48	9.6	0	6.68765	-4.49522	0.870847	-0.0627854	-29.6544	0.870847	0.429215	29.6544
49	9.8	0	6.7556	-4.50644	1.15754	0.366429	-29.1403	1.15754	0.366429	29.1403
50	10	0	7.38519	-3.54713	2.06102	9.49899	-161.654	2.06102	9.49899	161.654
51	10.2	0	7.59661	-3.10466	1.11829	2.62117	-55.1632	1.11829	2.62117	55.1632
52	10.4	0	6.96522	-2.13187	-1.75188	4.54805	-71.7483	2.12773	4.54805	71.7483
53	10.6	0	6.74945	-2.00714	-1.03708	0.938055	-6.52071	1.03708	0.938055	6.52071
54	10.8	0	6.46161	-1.85534	-1.13488	1.57583	-4.18518	1.13488	1.57583	4.18518
55	11	0	5.98305	-1.49561	-1.56123	2.98721	-19.8014	1.56123	2.98721	19.8014
56	11.2	0	5.62598	-1.20211	-0.145162	1.35273	-14.3563	0.707091	1.35273	14.3563
57	11.4	0	5.70695	-1.1909	0.203889	-0.466526	-11.5152	0.203889	0.537834	11.5152
58	11.6	0	5.6813	-1.21798	-0.343575	0.461065	-53.7189	0.343575	0.461065	53.7189
59	11.8	0	5.79689	-1.04295	1.3229	0.340557	-33.2537	1.3229	0.340557	33.2537
60	12	0	5.67346	-1.12743	-1.54816	-0.0661202	25.9116	1.54816	0.129192	25.9116
61	12.2	0	5.20692	-1.23346	-1.4627	1.09479	25.4195	1.4627	1.09479	25.4195
62	12.4	0	5.18524	-1.24154	-0.021837	0.0819938	3.85678	0.0659492	0.170308	3.85678
63	12.6	0	5.15002	-1.26581	-0.331624	-0.111263	3.45314	0.331624	0.111263	3.45314
64	12.8	0	5.15516	-1.3513	-0.263654	-0.476016	8.62875	0.263654	0.476016	8.62875
65	13	0	5.08593	-1.40999	-0.345141	0.0663972	9.50074	0.345141	0.257279	9.50074
66	13.2	0	5.08419	-1.48468	-0.238679	-0.273097	4.10812	0.238679	0.273097	4.10812
67	13.4	0	5.01755	-1.10203	1.3531	3.28826	10.9723	1.3531	3.28826	10.9723
68	13.6	0	4.97829	-1.04649	-0.119888	0.262716	11.3044	0.249663	0.396686	11.3044
69	13.8	0	4.90707	-1.04542	-0.302511	0.106424	12.7064	0.302511	0.40189	12.7064
70	14	0	4.92198	-1.00638	0.35369	0.376429	3.87682	0.35369	0.376429	3.87682
71	14.2	0	4.8659	-0.785927	0.0718286	1.63886	32.5487	0.0718286	1.63886	32.5487
72	14.4	0	4.64451	-0.61518	-0.897198	1.54924	12.6363	0.897198	1.54924	12.6363
73	14.6	0	4.27623	-0.237618	-1.133	2.08261	15.628	1.133	2.08261	15.628
74	14.8	0	3.60418	0.131308	-2.49846	1.46799	63.0085	2.49846	1.64879	63.0085
75	15	0	3.40408	-0.00289114	-1.41893	-1.18663	61.3184	1.41893	1.18663	61.3184
76	15.2	0	3.08404	0.104638	-1.60463	0.287291	67.926	1.60463	0.347607	67.926
77	15.4	0	3.17906	0.517387	-0.467544	2.04345	38.9872	0.467544	2.04345	38.9872
78	15.6	0	3.35597	1.04967	-0.331917	3.84361	44.7225	1.51464	3.84361	44.7225
79	15.8	0	3.64818	1.46047	-0.844881	0.794911	1.95129	0.844881	0.794911	1.95129
80	16	0	4.07367	1.98934	0.184049	3.22062	-20.799	0.79932	3.22062	20.799
81	16.2	0	4.47876	2.51458	-0.499138	3.29344	-5.90765	0.734755	3.29344	7.24215
82	16.4	0	4.58976	2.91934	-0.27785	1.6586	13.9007	0.638566	1.6586	13.9007
83	16.6	0	4.50006	3.88538	-3.61187	2.83774	21.7168	3.61187	2.83774	33.4567
84	16.8	0	5.35407	4.66491	1.48057	9.1259	-11.3823	1.48057	9.1259	11.3823
85	17	0	5.31881	4.97268	-1.98895	1.08872	60.6587	1.98895	1.08872	60.6587
86	17.2	0	5.5793	5.95725	-3.19796	5.15987	16.2595	3.19796	5.15987	16.2595
87	17.4	0	6.49123	6.3647	1.96072	3.04077	-5.28262	1.96072	3.04077	5.28262
88	17.6	0	6.81878	6.48163	-0.365322	1.44712	-0.653441	0.365322	1.44712	0.653441
89	17.8	0	7.17956	6.7634	-0.513345	2.85273	9.2671	0.513345	2.85273	9.2671
90	18	0	7.24669	7.34278	-2.63499	0.169741	33.8762	2.63499	1.71087	33.8762
91	18.2	0	6.9164	7.74069	-2.06108	-0.404991	29.9781	2.06108	0.404991	29.9781
92	18.4	0	6.93899	7.98755	-0.666515	0.849799	1.64906	0.666515	0.849799	1.64906
93	18.6	0	7.15507	8.06237	-0.477664	1.41667	-53.3686	1.27767	1.41667	53.3686
94	18.8	0	8.332	8.09284	3.52296	4.68255	-82.6305	3.52296	4.68255	82.6305
95	19	0	8.77589	8.40058	0.256062	1.90263	-32.8735	0.256062	1.90263	32.8735
96	19.2	0	9.08833	8.63792	0.71497	2.73616	-15.9233	0.71497	2.73616	15.9233
97	19.4	0	9.00061	8.88563	-1.52617	1.33171	14.1432	1.52617	1.43641	14.1432
98	19.6	0	9.04209	9.65523	-2.06875	2.52511	-5.39587	2.06875	2.52511	8.01597
99	19.8	0	9.47082	10.3312	1.55009	4.54904	-62.2241	2.22771	4.54904	62.2241
100	20	0	9.96112	10.7427	0.380671	2.0352	-26.8969	0.380671	2.0352	26.8969
101	20.2	0	9.65849	11.0386	-1.95485	0.0712131	-9.92409	1.95485	3.01967	18.4177
102	20.4	0	9.65243	10.9021	0.488309	0.11258	-23.2602	0.488309	0.228372	23.2602
103	20.6	0	9.54737	10.9145	-0.811827	-0.211692	15.9092	0.811827	0.495147	15.9092
104	20.8	0	9.3808	10.8977	-0.520561	-0.154649	9.56346	0.520561	0.154649	9.56346
105	21	0	9.34245	10.8673	0.00872228	-0.264263	2.72737	0.00872228	0.264263	2.72737
106	21.2	0	9.34931	10.8878	0.078549	0.0607853	-2.03945	0.23941	0.196919	2.05886
107	21.4	0	9.38245	10.8874	0.0832127	0.111574	-3.88152	0.0832127	0.111574	3.88152
108	21.6	0	9.35609	10.8815	-0.211182	-0.0955217	4.41267	0.211182	0.0955217	4.41267
109	21.8	0	9.32107	10.889	-0.142189	-0.0322742	2.14361	0.142189	0.0322742	2.14361
110	22	0	9.35498	10.8659	0.220743	-0.0109237	-3.8567	0.220743	0.16244	3.8567
111	22.2	0	9.3392	10.8563	-0.0982991	-0.116331	2.89544	0.101467	0.116331	2.89544
112	22.4	0	9.34304	10.8715	0.0712684	0.0775993	-2.77746	0.238806	0.107608	2.77746
113	22.6	0	9.37429	10.8713	0.107808	0.0984795	-1.94674	0.107808	0.0984795	1.94674
114	22.8	0	9.38061	10.8758	-0.004971	0.0154316	0.610733	0.0964675	0.0645374	2.36201
115	23	0	9.34942	10.8862	-0.16619	-0.0414268	2.90853	0.16619	0.176107	2.90853
116	23.2	0	9.34916	10.8724	0.0536457	0.0165273	-2.01196	0.0998635	0.0649565	3.32131
117	23.4	0	9.34729	10.8859	-0.0296105	0.0671366	0.734638	0.0296105	0.0671366	0.734638
118	23.6	0	9.34343	10.8798	-0.0168158	-0.0299731	0.584598	0.0194544	0.0326479	0.921251
119	23.8	0	9.35689	10.8851	0.0541721	0.0590808	-1.09488	0.0701714	0.0590808	1.09488
120	24	0	9.34364	10.8873	-0.063454	-0.024725	0.138144	0.063454	0.0390961	0.138144
121	24.2	0	9.34129	10.889	-0.00635845	0.000727413	0.0876733	0.00635845	0.000727413	0.0876733
122	24.4	0	9.3559	10.9186	0.0452404	0.287462	0.872291	0.055017	0.287462	0.872291
123	24.6	0	9.36278	10.9524	-0.108162	-0.062437	1.93131	0.15348	0.216544	2.24208
124	24.8	0	9.3186	10.9476	-0.13337	0.0133476	0.915173	0.13337	0.0915194	1.18114
125	25	0	9.35256	11.0952	-0.10119	0.839047	-1.16564	0.110443	0.839047	1.16564
126	25.2	0	9.38451	11.1474	0.223946	0.12282	0.524904	0.223946	0.12282	0.524904
127	25.4	0	9.37882	11.1304	-0.044388	-0.167436	-1.3422	0.134108	0.186766	1.44018
128	25.6	0	9.3718	11.1182	0.0662085	0.00624521	-3.26589	0.0682852	0.090003	3.26589
129	25.8	0	9.33085	11.1179	-0.264743	-0.0345054	5.58755	0.264743	0.0434086	5.58755
130	26	0	9.29977	11.1197	-0.144014	-0.0784565	1.01532	0.144014	0.0784565	1.01532
131	26.2	0	9.34213	11.1279	0.265641	0.240718	-2.98278	0.265641	0.344549	2.98278
132	26.4	0	9.40276	11.2247	0.0281406	0.472122	-0.711193	0.0281406	0.472122	0.711193
133	26.6	0	9.59903	11.5634	0.373453	1.67079	-5.11326	0.373453	1.67079	5.11326
134	26.8	0	9.5773	11.9757	-1.26247	3.19739	-9.5043	1.26247	3.19739	9.5043
135	27	0	9.62519	11.9888	0.337928	0.0906738	-17.2747	0.337928	0.155026	17.2747
136	27.2	0	10.0597	12.289	2.61215	2.53549	-60.6497	2.61215	2.53549	60.6497
137	27.4	0	10.3397	12.5481	0.112344	0.32109	11.5254	0.416005	0.32109	12.462
138	27.6	0	10.2036	12.6384	-1.08114	0.535363	43.682	1.08114	0.535363	43.682
139	27.8	0	10.0511	12.7039	-0.914828	0.201545	21.0965	0.914828	0.201545	21.0965
140	28	0	9.91379	12.7477	-0.436777	0.181919	8.78921	0.436777	0.274925	8.78921
141	28.2	0	9.91694	13.3127	-0.691832	3.8141	-33.742	0.691832	3.8141	33.742
142	28.4	0	10.1851	14.2761	2.34039	5.54842	-67.6093	2.34039	5.54842	67.6093
143	28.6	0	9.95682	14.5394	-1.16246	1.59476	-4.79986	1.16246	1.59476	5.46611
144	28.8	0	9.56264	14.6268	-1.91388	0.0748819	8.90321	1.91388	0.128812	8.90321
145	29	0	9.51559	14.7313	0.330907	1.23406	-36.8987	0.330907	1.81884	36.8987
146	29.2	0	9.60314	14.7765	0.399603	-0.504382	-8.95587	0.399603	1.03776	8.95587
147	29.4	0	10.1017	14.3073	3.53665	-5.11794	31.9167	3.53665	5.11794	31.9167
148	29.6	0	9.93978	13.9354	-1.31135	-1.92495	65.3209	1.31135	1.92495	65.3209
149	29.8	0	9.02405	13.0144	-2.68241	-5.56672	103.259	2.68241	5.56672	103.259
150	30	0	8.53407	12.4747	-0.465873	-2.92584	102.743	1.60632	2.92584	102.743
151	30.2	0	8.12751	13.1214	-6.02924	0.490493	213.576	6.02924	0.490493	213.576
152	30.4	0	8.4015	13.0152	0.248919	1.44632	55.6392	1.7073	1.44632	55.6392
153	30.6	0	9.13335	13.1552	0.0196272	3.71694	35.1739	1.98366	3.71694	35.1739
154	30.8	0	9.63189	12.8455	1.15685	2.85664	-7.53889	1.15685	2.85664	7.53889
155	31	0	10.2439	12.5518	0.794973	2.99083	6.27009	0.794973	2.99083	6.27009
156	31.2	0	10.7213	12.6478	-1.13564	2.14857	58.8241	1.13564	2.14857	58.8241
157	31.4	0	11.0835	12.8062	-1.64038	1.36033	112.312	1.64038	1.36033	112.312
158	31.6	0	11.5408	12.8294	-1.6143	1.05601	54.3011	1.6143	1.05601	54.3011
159	31.8	0	11.7797	12.8675	-0.872479	0.310735	7.85021	0.872479	0.310735	7.85021
160	32	0	11.9541	12.557	0.322718	1.75331	-23.546	0.589541	1.75331	23.546
161	32.2	0	11.9873	12.3659	0.0697637	0.734282	-12.0232	0.430152	0.734282	12.0232
162	32.4	0	12.2817	12.2376	-0.60317	1.68746	4.19024	0.60317	1.68746	5.06199
163	32.6	0	12.7254	11.5629	0.667952	5.90199	-0.0125124	0.667952	5.90199	0.0125124
164	32.8	0	13.0857	11.3725	-1.2757	2.45382	28.8019	1.2757	2.45382	28.8019
165	33	0	13.4928	11.3449	-1.23722	0.256637	31.6638	1.23722	0.256637	31.6638
166	33.2	0	13.5655	11.3534	0.00600098	0.00933348	-3.60314	0.0674818	0.0737294	4.98054
167	33.4	0	13.5578	11.2641	0.230825	0.489565	-6.5595	0.230825	0.489565	6.5595
168	33.6	0	13.6007	11.1577	-0.0117066	0.740568	-1.61778	0.0117066	0.740568	1.61778
169	33.8	0	13.8285	11.0355	-1.1285	1.10989	4.43854	1.1285	1.10989	4.43854
170	34	0	14.7107	9.89005	-1.45515	6.09588	55.5534	1.74016	6.09588	58.1683
171	34.2	0	14.5156	9.3957	0.948849	1.58992	71.4241	2.08348	2.27896	71.4241
172	34.4	0	14.902	9.39982	-2.88249	-0.0542992	85.6898	2.88249	0.0542992	85.6898
173	34.6	0	15.855	8.67333	-7.54396	2.12922	189.11	7.54396	3.22116	189.11
174	34.8	0	15.2697	8.18309	3.41753	4.02052	-34.6646	3.41753	4.02052	36.9698
175	35	0	12.5898	8.47815	10.0498	7.12457	-51.7949	10.0498	7.12457	51.7949
176	35.2	0	11.5031	9.74907	8.61087	-5.46462	-26.1642	8.61087	5.46462	26.1642
177	35.4	0	12.5932	8.81867	-12.5307	0.34939	154.159	12.5307	6.38548	154.159
178	35.6	0	13.178	5.81375	-9.22456	0.647865	136.434	9.22456	1.53541	136.434
179	35.8	0	13.5287	6.07213	4.02109	-2.90346	-67.2742	4.02109	3.99824	67.2742
180	36	0	13.4368	7.50935	10.5929	0.665309	-247.215	10.5929	0.665309	247.215
181	36.2	0	13.2097	8.41536	3.55739	-2.10976	-92.1335	3.55739	2.10976	92.1335
182	36.4	0	13.2097	8.41536	0	0	0	0	0	0
183	36.6	0	13.068	8.15609	-0.48053	1.28965	-39.9311	1.29107	1.4811	42.6323
184	36.8	0	13.8456	7.97542	-5.88261	-1.79971	60.6476	5.88261	1.79971	60.6476
185	37	0	13.8929	7.9985	0.0362442	-0.182487	-6.2342	0.592783	0.251669	6.2342
186	37.2	0	13.7988	8.04425	0.361584	-0.0499633	-15.0685	0.361584	0.235492	15.0685
187	37.4	0	13.7573	8.0966	0.286227	0.0186539	-3.88038	0.286227	0.247789	3.88038
188	37.6	0	13.8978	8.11028	-0.701447	-0.544153	12.8252	0.701447	0.544153	12.8252
189	37.8	0	13.8984	8.1299	0.299047	0.109741	-2.95541	0.299047	0.109741	2.95541
190	38	0	13.8883	8.11892	0.0101373	0.0508013	0.572393	0.0290397	0.103449	0.572393
191	38.2	0	13.9488	8.0951	-0.292295	-0.0469735	5.96004	0.292295	0.0469735	5.96004
192	38.4	0	13.9441	8.09879	0.122825	-0.0342845	-1.99811	0.209792	0.1577	4.12716
193	38.6	0	13.9267	8.10129	-0.0220391	0.156065	-0.773655	0.0220391	0.156065	0.773655
194	38.8	0	13.9504	8.10119	-0.0945407	-0.0184748	2.67454	0.0945407	0.155796	2.67454
195	39	0	13.9342	8.08745	0.0322843	0.0169548	-0.468509	0.0400183	0.16582	0.468509
196	39.2	0	13.9378	8.08674	0.00828242	0.0784841	0.175503	0.077284	0.108106	1.31388
197	39.4	0	13.9334	8.07506	-0.0621268	0.0150404	-0.405003	0.0621268	0.0150404	0.405003
198	39.6	0	13.9348	8.08518	-0.0108519	-0.0565231	0.243424	0.1023	0.0565231	0.700687
199	39.8	0	13.9308	8.075	0.0317255	0.107204	-0.23248	0.0317255	0.107204	0.23248
200	40	0	13.9294	8.07642	-0.00327634	-0.0587595	0.151381	0.00327634	0.0587595	0.151381
201	40.2	0	13.9358	8.05931	-0.124995	0.123927	1.92351	0.124995	0.123927	1.92351
202	40.4	0	13.9414	8.06462	-0.0308012	-0.0441162	0.947618	0.0553712	0.0441162	0.947618
203	40.6	0	13.9434	8.05771	0.0138006	0.0257151	-0.603944	0.0483828	0.0532947	0.603944
204	40.8	0	13.946	8.05925	-0.0274996	-0.00655824	0.280391	0.0274996	0.00655824	0.280391
205	41	0	13.95	8.05823	-0.0233108	-0.00716785	0.243841	0.0233108	0.00716785	0.243841
206	41.2	0	13.9123	8.05288	0.24734	0.190776	-4.19853	0.24734	0.190776	4.38384
207	41.4	0	13.8773	8.05119	-0.0358539	-0.0814151	0.520595	0.153698	0.244653	3.2421
208	41.6	0	13.8772	8.04071	0.0495523	0.0985659	-0.882532	0.0536319	0.190617	1.87325
209	41.8	0	13.8639	8.00825	-0.0338722	0.188511	-0.517957	0.0872111	0.188511	0.517957
210	42	0	13.9012	7.98143	-0.42902	0.011912	6.26011	0.42902	0.011912	6.26011
211	42.2	0	13.863	7.99844	0.167357	0.0272385	-3.35698	0.229218	0.0272385	3.35698
212	42.4	0	13.8662	8.0002	0.0108044	-0.035578	0.498231	0.0108044	0.035578	0.498231
213	42.6	0	13.7776	8.02325	0.832531	0.247928	-9.26211	0.949899	0.274342	11.9394
214	42.8	0	13.5838	8.03482	0.667308	0.459335	-21.2748	0.667308	0.459335	21.2748
215	43	0	13.5268	8.00573	0.171453	0.197042	-2.6805	0.175577	0.300309	6.72005
216	43.2	0	13.6488	7.98372	-0.713247	-0.126758	12.4644	0.713247	0.126758	12.4644
217	43.4	0	13.8613	7.91264	-1.00243	-0.223864	19.3774	1.00243	0.223864	19.3774
218	43.6	0	14.0406	7.85626	-1.15415	-0.352259	19.8448	1.15415	0.352259	19.8448
219	43.8	0	14.0697	7.817	-0.118348	0.162254	11.1895	0.472138	0.212934	11.1895
220	44	0	14.0531	7.78389	-0.163145	0.0613547	0.475928	0.163145	0.081197	2.68951
221	44.2	0	14.0414	7.80017	0.108502	0.0347455	-1.83505	0.196168	0.186918	2.6764
222	44.4	0	14.0405	7.80238	0.0605935	-0.122361	-2.81834	0.0605935	0.122361	2.81834
223	44.6	0	14.0808	7.78609	-0.319626	-0.0294117	7.59243	0.319626	0.111566	7.59243
224	44.8	0	14.0765	7.76585	0.11922	0.0547168	-2.9605	0.11922	0.0861761	2.9605
225	45	0	14.0258	7.78581	0.269299	0.0817841	-4.69065	0.269299	0.0817841	4.69065
226	45.2	0	13.9976	7.81351	0.217882	-0.0660152	-3.17059	0.217882	0.0660152	3.17059
227	45.4	0	14.0273	7.7838	-0.376085	0.0371097	4.36215	0.396589	0.0371097	5.89573
228	45.6	0	14.086	7.7628	-0.061017	-0.0887503	2.84001	0.088633	0.0966498	4.57236
229	45.8	0	14.0537	7.77004	0.17005	0.0446804	-3.72269	0.17005	0.103375	3.72269
230	46	0	14.0136	7.79627	0.229184	0.0276246	-4.30514	0.229184	0.0276246	4.30514
231	46.2	0	14.0055	7.81507	0.0276437	-0.09248	-4.98442	0.0276437	0.09248	4.98442
232	46.4	0	14.0238	7.80882	-0.176192	-0.0241983	4.62387	0.20319	0.0278048	4.62387
233	46.6	0	14.035	7.80993	0.133544	-0.00748714	-2.91229	0.167419	0.113007	3.37306
234	46.8	0	14.2093	7.71334	-1.04393	-0.188561	20.0773	1.04393	0.188561	20.0773
235	47	0	14.2339	7.68844	-0.10377	0.0829349	-1.21482	0.10377	0.0829349	1.21482
236	47.2	0	14	7.82136	1.26202	0.183272	-23.3008	1.26202	0.183272	23.3008
237	47.4	0	14.0268	7.80801	-0.259844	-0.0389742	5.74015	0.259844	0.0389742	5.74015
238	47.6	0	14.0736	7.78095	-0.206041	-0.026783	2.50651	0.206041	0.026783	2.53193
239	47.8	0	14.0531	7.80275	0.280277	-0.0399104	-3.74815	0.280277	0.0399104	3.74815
240	48	0	14.0611	7.78533	-0.0793009	0.0195616	0.606804	0.0793009	0.10477	0.606804
241	48.2	0	14.0769	7.768	-0.170229	0.0683523	1.37502	0.170229	0.0683523	1.43161
242	48.4	0	14.1488	7.74022	-0.191609	-0.127232	6.34469	0.428091	0.127232	9.83842
243	48.6	0	14.1087	7.75593	0.246109	0.119558	-5.51603	0.246109	0.119558	5.51603
244	48.8	0	14.0982	7.75106	0.0156215	0.0491978	-1.32654	0.0465853	0.0491978	1.32654
245	49	0	14.1054	7.75952	-0.0297624	-0.0590518	1.59003	0.110528	0.0590518	1.59003
246	49.2	0	14.1181	7.75445	-0.0102596	-0.00159022	0.0275829	0.0611381	0.0374816	1.01521
247	49.4	0	14.1134	7.75274	-0.00146446	0.0196706	-0.541823	0.00146446	0.0196706	0.541823
248	49.6	0	14.1107	7.75955	0.0403201	-0.0300793	-0.127264	0.0403201	0.0300793	0.127264
249	49.8	0	14.1055	7.76055	0.00315722	0.0369214	-0.693961	0.0231141	0.0369214	0.82802
250	50	0	14.1482	7.73995	-0.203253	-0.0560818	3.33373	0.203253	0.0587334	4.43113
251	50.2	0	14.1648	7.72137	-0.117713	-0.00740756	2.77852	0.117713	0.0941922	2.77852
252	50.4	0	14.103	7.76252	0.680611	0.101542	-12.3424	0.680611	0.101542	12.3424
253	50.6	0	14.0673	7.76851	0.175675	0.10322	-4.13942	0.175675	0.10322	4.13942
254	50.8	0	14.1163	7.74197	-0.57502	-0.121144	11.2084	0.61873	0.121144	11.2084
255	51	0	14.2916	7.64879	-0.589032	-0.145002	11.5916	0.589032	0.145002	11.5916
256	51.2	0	14.2786	7.65475	0.182391	0.0825712	-4.72867	0.182391	0.0825712	4.72867
257	51.4	0	14.1644	7.70875	0.934476	0.246989	-16.4813	0.934476	0.246989	16.4813
258	51.6	0	14.1682	7.71527	-0.504748	-0.150627	8.1812	0.504748	0.150627	8.1812
259	51.8	0	13.9107	7.80748	1.40406	0.430767	-24.6724	1.40406	0.430767	24.6724
260	52	0	13.8323	7.8269	0.392738	0.109167	-8.84917	0.392738	0.109167	8.84917
261	52.2	0	13.9099	7.81335	-0.762567	-0.282692	17.8516	1.02343	0.282692	21.738
262	52.4	0	13.9314	7.80921	0.49589	0.171633	-11.8048	0.49589	0.171633	11.8048
263	52.6	0	13.7796	7.86088	0.577031	0.128127	-10.836	0.577031	0.128127	10.836
264	52.8	0	13.769	7.86065	0.0127622	0.00949329	0.0150985	0.0127622	0.00949329	0.0150985
265	53	0	13.8287	7.86667	-0.297187	-0.210937	7.27023	0.297187	0.210937	7.27023
266	53.2	0	14.1347	7.71874	-1.656	-0.258819	30.5173	1.656	0.258819	30.5173
267	53.4	0	14.1849	7.69714	0.0782027	0.00596193	-1.68417	0.0874837	0.108023	1.68417
268	53.6	0	14.103	7.72751	0.645055	0.190685	-12.4292	0.645055	0.190685	12.4292
269	53.8	0	13.9983	7.79302	0.744394	0.043099	-12.0412	0.744394	0.0618448	12.0412
270	54	0	13.8866	7.84995	0.503902	0.131519	-10.3982	0.503902	0.131519	10.3982
271	54.2	0	13.831	7.8671	0.109851	0.00774214	-1.87415	0.109851	0.0749272	1.87415
272	54.4	0	13.851	7.85756	-0.238782	-0.0578999	2.12822	0.238782	0.190147	2.97279
273	54.6	0	14.0502	7.78222	-1.58284	-0.339293	35.3992	1.58284	0.339293	35.3992
274	54.8	0	14.1794	7.70107	-0.816601	-0.0273951	14.2699	0.816601	0.236061	14.2699
275	55	0	14.1828	7.67666	0.134669	0.0311603	0.767032	0.140019	0.0311603	8.10209
276	55.2	0	14.1091	7.71114	0.38996	0.111963	-7.91457	0.38996	0.111963	7.91457
277	55.4	0	14.059	7.74086	0.282578	0.0163263	-7.16259	0.282578	0.0163263	7.16259
278	55.6	0	14.0176	7.75879	0.239688	0.0485369	-3.6852	0.239688	0.0509586	3.6852
279	55.8	0	14.0484	7.74678	-0.300369	-0.0856019	5.86356	0.300369	0.0920547	5.86356
280	56	0	14.0699	7.74448	0.123012	0.0234082	-1.47121	0.235506	0.0929982	2.76134
281	56.2	0	13.9736	7.78254	0.696711	0.194444	-14.6542	0.696711	0.194444	14.6542
282	56.4	0	13.9493	7.79552	0.0438184	0.00182631	-1.16578	0.348573	0.0626053	7.52419
283	56.6	0	14.0322	7.74876	-0.442708	-0.0650048	7.66722	0.442708	0.0650048	7.66722
284	56.8	0	14.0932	7.73426	-0.225791	-0.10564	4.57374	0.225791	0.10564	4.57374
285	57	0	14.1175	7.70563	-0.168122	0.0914872	2.71799	0.168122	0.0914872	2.71799
286	57.2	0	14.1002	7.7162	0.108416	0.0106876	-1.64644	0.108416	0.0175559	1.64644
287	57.4	0	14.0626	7.74391	0.197413	0.0133829	-3.94892	0.197413	0.0133829	3.94892
288	57.6	0	14.0489	7.73412	-0.00464319	0.0863735	-0.366164	0.0496534	0.0863735	0.366164
289	57.8	0	14.0378	7.72773	0.0698763	0.0674291	-1.50267	0.0698763	0.0674291	1.50267
290	58	0	14.0029	7.75481	0.208322	0.000340339	-3.35579	0.208322	0.00468648	3.35579
291	58.2	0	14.0911	7.71261	-0.553221	-0.0865836	10.0282	0.553221	0.121198	10.0282
292	58.4	0	13.9566	7.77236	1.04254	0.196622	-15.4688	1.04254	0.196622	15.4688
293	58.6	0	13.5849	7.89842	1.56831	0.414613	-34.3927	1.56831	0.414613	34.3927
294	58.8	0	13.6548	7.89241	-0.938136	-0.316932	11.8625	0.938136	0.316932	11.8625
295	59	0	13.6689	7.86227	0.149849	0.200519	6.48962	0.942504	0.260848	22.375
296	59.2	0	13.2121	7.96789	1.83039	0.402782	-45.9988	1.83039	0.402782	45.9988
297	59.4	0	13.306	7.9424	-0.80896	-0.145787	18.3298	0.80896	0.14607	18.3298
298	59.6	0	13.433	7.95473	-0.407198	-0.403882	1.31082	0.407198	0.403882	1.31082
299	59.8	0	13.6368	7.88962	-1.573	-0.27141	29.7409	1.573	0.27141	29.7409
300	60	1	13.8052	7.83036	-0.159612	-0.0106941	3.43069	0.159612	0.0647617	10.3456
301	60.2	1	13.8244	7.81004	-0.257923	0.00666609	3.23583	0.408398	0.044407	7.61203
302	60.4	1	13.8892	7.78858	-0.247708	-0.131763	5.49653	0.247708	0.131763	5.49653
303	60.6	1	13.9407	7.76982	-0.328442	-0.0991078	5.39982	0.328442	0.0991078	5.39982
304	60.8	1	13.9317	7.80421	0.361865	-0.121223	1.3066	0.361865	0.122623	1.3066
305	61	1	13.8142	8.0556	1.25127	-0.760812	9.1965	1.25127	0.760812	9.1965
306	61.2	1	13.3355	8.51608	5.15057	0.339816	110.679	5.15057	0.339816	110.679
307	61.4	1	13.417	8.2357	-1.50163	0.445137	103.719	1.50163	0.445137	103.719
308	61.6	1	13.283	7.9739	-0.970281	2.70978	-22.6549	0.970281	4.53381	54.0925
309	61.8	1	12.8104	8.26091	2.80353	-0.0176751	-45.5662	2.80353	2.02426	45.5662
310	62	1	12.3578	8.32292	1.45623	2.06826	-50.8031	1.45623	2.06826	50.8031
311	62.2	1	12.5946	8.30002	-2.51351	-0.764239	43.5065	4.56816	1.35193	46.2638
312	62.4	1	12.234	7.20085	-1.61744	4.17047	25.8884	3.24641	4.17047	40.1135
313	62.6	1	11.6732	7.47393	1.53083	1.34933	-48.3183	2.17239	1.34933	48.3183
314	62.8	1	10.4483	7.07992	4.06004	4.85803	-77.7029	4.06004	4.85803	77.7029
315	63	0	10.0147	6.60826	-3.00561	5.5338	4.92791	3.00561	5.5338	4.92791
316	63.2	0	9.16051	6.07257	1.24553	5.93509	25.6529	1.24553	5.93509	25.6529
317	63.4	0	8.23013	4.49962	-1.62546	6.79765	-0.94918	3.54646	6.79765	10.1652
318	63.6	0	7.77914	4.41361	1.12235	1.37031	-2.16618	1.12235	1.37031	2.43441
319	63.8	0	7.58817	3.92882	-3.21951	2.98009	133.694	3.21951	2.98009	133.694
320	64	0	6.99806	4.32076	4.42151	1.35283	-89.7986	4.42151	1.35283	89.7986
321	64.2	0	6.46117	4.89901	2.48372	-1.10387	-95.6418	2.48372	1.10387	95.6418
322	64.4	0	5.69119	5.0491	4.19228	0.053323	-98.2516	4.19228	0.0806517	98.2516
323	64.6	0	5.03944	3.58068	7.51178	11.1958	-275.882	7.51178	11.1958	275.882
324	64.8	0	6.33585	2.49867	-2.50997	9.67864	-48.8011	2.57691	9.67864	48.8011
325	65	0	7.05359	2.36215	-1.18308	0.765759	-23.0415	1.43772	0.765759	23.0415
326	65.2	0	6.83418	1.60082	7.95321	1.06855	-115.934	7.95321	1.06855	115.934
327	65.4	0	6.83418	1.60082	0	0	0	0	0	0
328	65.6	0	6.83418	1.60082	0	0	0	0	0	0
329	65.8	0	6.94298	1.63339	-0.657751	0.753933	-2.29246	0.657751	0.753933	2.29246
330	66	0	7.05177	1.66595	-1.3155	1.50787	-4.58493	1.3155	1.50787	4.58493
331	66.2	0	7.49275	1.75339	-0.965649	1.72606	-6.97284	0.965649	1.72606	6.97284
332	66.4	0	8.05368	1.48335	0.154989	4.49662	10.8523	0.154989	4.49662	12.4614
333	66.6	0	9.15024	1.70531	-3.59716	2.18894	25.2106	3.59716	2.18894	25.2106
334	66.8	0	9.76614	1.62102	-0.648919	3.37742	19.6915	0.787922	3.37742	19.6915
335	67	0	10.6654	1.23245	-1.26918	4.17604	-6.02492	1.26918	4.17604	6.02492
336	67.2	0	11.1787	1.05975	-0.638874	2.66454	-4.01738	0.638874	2.66454	4.01738
337	67.4	0	11.4703	0.972396	-0.563212	1.51932	0.400515	0.563212	1.51932	0.701308
338	67.6	0	11.514	0.900024	0.262276	0.0918947	8.74324	0.49585	0.13071	8.74324
339	67.8	0	11.4409	1.06716	-0.374469	-0.72008	5.61141	0.374469	0.72008	5.61141
340	68	0	11.4391	1.11232	-0.244701	-0.185562	4.82138	0.244701	0.185562	4.82138
341	68.2	0	11.4987	1.081	-0.0914964	0.554716	-2.56531	0.0914964	0.554716	3.4992
342	68.4	0	11.5989	1.03266	-0.0768116	0.202924	-4.27035	0.0768116	0.262694	4.27035
343	68.6	0	11.6344	1.04508	-0.211709	0.236511	-2.05964	0.211709	0.274043	2.05964
344	68.8	0	11.673	1.07082	-0.194559	-0.111815	-4.12636	0.194559	0.111815	4.12636
345	69	0	9.98259	1.14195	2.25806	-7.1256	-89.167	4.09559	7.1256	110.587
346	69.2	0	10.5172	1.56438	-2.27059	2.86646	-9.9253	2.27059	2.86646	80.4167
347	69.4	0	10.8098	1.36095	1.04342	0.436347	-50.5483	1.04342	0.436347	50.5483
348	69.6	0	10.7992	1.31782	-0.267418	-0.106142	-38.2949	0.267418	0.106142	38.2949
349	69.8	0	10.994	1.03924	1.87876	0.652653	-75.1399	1.87876	0.652653	75.1399
350	70	0	10.8804	1.04664	-1.22477	-1.2571	3.54313	1.22477	1.62856	3.54313
351	70.2	0	10.8433	0.992004	1.54555	0.895406	-71.1408	1.54555	1.18199	71.1408
352	70.4	0	11.6373	0.579617	5.62074	2.2422	-95.1456	5.62074	2.2422	95.1456
353	70.6	0	11.789	0.404459	1.13851	-0.030949	-9.5092	1.13851	0.349688	9.5092
354	70.8	0	12.2162	0.0964407	2.34864	-0.380062	-20.1563	2.34864	1.35187	25.5787
355	71	0	12.3351	-0.287352	2.34753	-0.216015	-81.7586	2.34753	2.37533	81.7586
356	71.2	0	13.3757	0.0382691	2.17145	3.54491	-132.56	7.71538	3.54491	132.56
357	71.4	0	12.617	0.539534	-3.05042	2.95727	-12.0937	3.05042	2.95727	12.0937
358	71.6	0	12.5658	1.1692	0.93118	3.45361	-33.9347	0.93118	3.45361	33.9347
359	71.8	0	12.7237	1.87915	1.38345	1.90612	-23.9305	1.38345	1.90612	23.9305
360	72	0	12.7237	1.87915	0	0	0	0	0	0
361	72.2	0	12.7237	1.87915	0	0	0	0	0	0
362	72.4	0	12.7237	1.87915	0	0	0	0	0	0
363	72.6	0	12.7237	1.87915	0	0	0	0	0	0
364	72.8	0	12.813	-0.344828	-7.15313	-18.2633	20.8115	7.15313	18.2633	20.8115
365	73	0	13.74	-4.51782	0.059213	-18.6927	-30.9323	0.059213	18.6927	30.9323
366	73.2	0	13.7393	-4.48158	0.107193	0.0470467	-3.2211	0.107193	0.441875	3.2211
367	73.4	0	13.7691	-4.48588	0.0736165	0.0376185	-1.45755	0.0736165	0.0376185	1.45755
368	73.6	0	13.746	-4.49956	-0.146438	-0.0476838	2.18079	0.146438	0.0511429	2.18079
369	73.8	0	13.7355	-4.45664	0.121396	0.431454	5.96485	0.121396	0.431454	5.96485
370	74	0	13.7067	-4.46407	-0.174085	-0.0326285	1.88614	0.174085	0.18953	1.88614
371	74.2	0	13.6866	-4.4609	-0.0387975	0.274094	2.31553	0.0387975	0.40366	2.31553
372	74.4	0	13.6811	-4.43171	0.0138345	-0.105019	-1.52402	0.109992	0.147501	1.52402
373	74.6	0	13.6888	-4.44652	0.0570637	-0.0206701	-0.0218557	0.0570637	0.0206701	0.0218557
374	74.8	0	13.5725	-4.27886	-0.374365	1.657	2.98323	0.43937	1.657	2.98323
375	75	0	13.3202	-4.13804	-0.980653	0.0118053	28.2287	0.980653	0.803743	28.2287
376	75.2	0	13.1282	-4.25696	-0.77687	-0.102113	12.8508	0.77687	0.116501	12.8508
377	75.4	0	13.105	-4.2083	0.318361	0.565235	-4.37293	0.318361	0.565235	4.37293
378	75.6	0	13.1892	-3.94874	1.047	1.461	-0.924635	1.047	1.461	0.924635
379	75.8	0	12.8262	-3.53784	-2.23088	1.3387	128.313	2.46923	3.27384	128.313
380	76	0	12.3398	-2.15292	-4.38339	9.39463	47.5761	4.38339	9.39463	94.4479
381	76.2	0	13.0999	-0.718579	0.721591	3.85225	-50.0147	2.56739	3.85225	50.0147
382	76.4	0	12.9189	-0.596698	-0.903966	-0.292749	-4.0199	0.903966	0.292749	4.0199
383	76.6	0	12.7838	-0.640787	-0.707517	-0.54564	-20.7463	0.707517	0.54564	20.7463
384	76.8	0	12.9497	-0.968976	1.19083	-1.48783	-47.4366	1.19083	1.48783	47.4366
385	77	0	13.1759	-1.06845	1.17243	0.0149251	-51.1626	1.17243	0.939957	51.1626
386	77.2	0	13.5226	-0.887554	2.66032	0.269544	-31.2132	2.66032	0.269544	31.2132
387	77.4	0	13.7866	-0.58769	3.77773	1.12403	-164.034	3.77773	2.26418	164.034
388	77.6	0	13.9282	0.102275	1.70388	1.63316	-134.709	1.70388	1.9736	134.709
389	77.8	0	13.1598	0.490888	0.897348	3.57031	-44.686	1.38702	3.57031	44.686
390	78	0	13.2484	-0.109327	-5.12124	-2.06228	9.08662	5.12124	2.06228	9.08662
391	78.2	0	12.7847	0.156083	3.14355	0.934116	-225.705	3.14355	1.42508	225.705
392	78.4	0	12.0761	0.297467	2.29169	2.04884	-57.9305	2.29169	2.04884	57.9305
393	78.6	0	12.2084	0.456087	-0.965909	-2.69626	50.985	0.965909	2.69626	50.985
394	78.8	0	11.9792	0.86644	4.27011	0.374352	-49.2093	4.27011	0.374352	49.2093
395	79	0	10.7739	0.596329	5.88552	2.33516	-148.85	5.88552	2.33516	148.85
396	79.2	0	11.4456	-0.546434	-3.56605	5.21402	3.4275	3.56605	5.59952	3.4275
397	79.4	0	11.1533	-0.715898	3.1058	0.707075	-107.783	3.1058	0.707075	107.783
398	79.6	0	10.8709	-1.1344	0.536186	1.12619	7.78705	0.939433	1.12619	26.1364
399	79.8	0	10.9644	-1.06273	-0.786596	-0.642549	36.6212	0.786596	0.642549	36.6212
400	80	0	10.9695	-1.60452	1.80065	2.7945	16.3197	2.19726	2.7945	55.2772
401	80.2	0	10.4568	-1.99502	2.15751	0.20952	-9.85923	2.15751	0.521076	9.85923
402	80.4	0	10.2612	-2.0246	0.772378	0.0518581	5.0836	0.772378	0.697656	5.93719
403	80.6	0	10.5317	-1.30654	-4.91884	-5.74912	76.4541	4.91884	5.74912	76.4541
404	80.8	0	11.0138	-1.18305	-2.91468	-0.584559	124.711	2.91468	0.605614	124.711
405	81	0	11.1764	-1.21451	0	0	0	0	0	0
406	81.2	0	11.3957	-1.25108	-1.9319	-0.333615	37.6829	1.9319	0.333615	37.6829
407	81.4	0	11.8352	-1.34004	-1.93544	-0.485838	69.2241	1.93544	0.485838	69.2241
408	81.6	0	11.7782	-1.68423	-1.06053	1.75609	65.2208	1.06053	1.75609	65.2208
409	81.8	0	10.7478	-2.108	1.97617	6.65965	61.4855	1.97617	6.65965	61.4855
410	82	0	10.343	-2.09123	0.145255	-1.41935	44.6653	1.84429	1.41935	44.6653
411	82.2	0	10.3689	-2.67977	-4.57643	2.35815	133.827	4.57643	2.35815	133.827
412	82.4	0	10.2858	-3.05084	-2.69116	0.144542	72.2385	2.69116	0.458017	72.2385
413	82.6	0	9.16662	-3.15658	-1.51914	7.61946	66.6673	1.51914	7.61946	66.6673
414	82.8	0	8.34326	-2.60394	1.47277	2.52492	-13.8647	1.47277	2.52492	13.8647
415	83	0	8.45852	-2.13181	3.16673	-1.00619	79.8524	3.16673	1.00619	79.8524
416	83.2	0	7.99001	-1.80276	-0.37681	3.0166	111.564	0.752121	3.0166	111.564
417	83.4	0	7.87772	-1.82058	-0.640598	-0.536739	97.3259	0.640598	0.536739	97.3259
418	83.6	0	8.19363	-1.77192	1.63445	0.097609	7.29463	1.63445	0.179838	7.29463
419	83.8	0	8.36623	-1.60178	0.670049	1.04227	10.1562	1.16083	1.04227	10.1562
420	84	0	8.48144	-1.49006	1.34951	0.210842	64.3958	1.34951	0.210842	64.3958
421	84.2	0	8.5127	-1.30601	1.04509	1.56247	-30.3146	2.58045	1.62435	62.7768
422	84.4	0	9.21393	-0.523823	3.66283	2.59131	-85.2678	3.66283	2.59131	85.2678
423	84.6	0	9.19619	0.306889	-0.0137223	3.55959	-19.4474	2.87719	3.55959	55.9186
424	84.8	0	8.69159	0.561388	-1.36536	2.85802	19.6933	1.36536	2.85802	19.6933
425	85	0	8.12112	0.936035	-1.36217	2.84695	5.52265	2.02616	2.84695	5.52265
426	85.2	0	7.3487	1.53567	-5.68433	6.46928	69.6342	6.81671	6.52041	76.2391
427	85.4	0	6.62882	2.56668	1.5172	3.01139	4.24365	1.5172	3.01139	4.24365
428	85.6	0	6.42246	2.91692	-2.02307	1.82402	5.15899	2.02307	1.82402	5.15899
429	85.8	0	5.86701	3.11143	-4.08675	1.45472	33.4849	4.08675	1.45472	33.4849
430	86	0	5.09458	3.50084	-1.69101	1.60915	2.75527	1.69101	1.60915	7.42294
431	86.2	0	5.16538	3.81426	0.0550036	1.26147	-14.5064	1.50584	1.26147	30.0556
432	86.4	0	5.06334	3.79529	-0.178619	-0.224848	5.38062	0.178619	0.224848	5.38062
433	86.6	0	5.06092	3.73644	-0.036223	-0.319014	2.98219	0.036223	0.319014	2.98219
434	86.8	0	5.07525	3.8428	0.142206	0.401113	-3.99814	0.142206	0.899366	3.99814
435	87	0	5.031	3.75716	-0.318948	-0.300982	9.44464	0.318948	0.300982	9.44464
436	87.2	0	5.02086	3.74821	0.0357808	0.0305188	0.141445	0.0357808	0.0305188	0.141445
437	87.4	0	5.03468	3.73204	0.0845645	-0.105406	-1.48815	0.0845645	0.105406	1.48815
438	87.6	0	5.02639	3.72232	-0.18865	0.0494263	0.00541362	0.317908	0.183083	2.24654
439	87.8	0	5.03737	3.75157	0.133112	-0.00314633	1.24846	0.311783	0.287945	3.3784
440	88	0	5.02518	3.74218	-0.0642309	0.08451	0.178859	0.152575	0.124341	3.21445
441	88.2	0	5.06256	3.79258	0.443181	0.334761	-0.771057	0.443181	0.334761	0.771057
442	88.4	0	5.04132	3.78812	-0.119384	-0.0834882	-1.2705	0.119384	0.178425	1.33497
443	88.6	0	5.02892	3.81017	-0.00983722	0.260543	2.95817	0.0837561	0.260543	2.95817
444	88.8	0	4.83874	4.2956	-1.23483	2.44261	31.4553	1.23483	2.44261	31.4553
445	89	0	4.65848	4.61561	-1.39581	1.69046	13.3668	1.39581	1.69046	13.3668
446	89.2	0	4.64952	4.92831	-0.888154	1.86915	-6.09313	1.7477	1.86915	6.09313
447	89.4	0	4.36206	5.49507	-1.22043	2.42756	4.68976	1.22043	2.42756	4.68976
448	89.6	0	4.22963	5.81644	-0.741151	0.97566	21.8103	0.741151	0.97566	21.8103
449	89.8	0	5.06992	6.73325	4.06836	10.0429	202.76	4.06836	10.0429	202.76
450	90	0	5.4829	7.11741	-0.0367648	3.95118	141.487	0.112667	3.95118	141.487
451	90.2	0	6.12189	7.14361	1.01107	2.05865	90.5361	1.16282	2.05865	90.5361
452	90.4	0	6.47196	7.38422	-0.825209	1.25471	31.9987	1.29112	1.25471	31.9987
453	90.6	0	6.48838	7.23162	1.15496	-0.476195	77.654	1.15496	0.476195	77.654
454	90.8	0	6.69501	7.29317	-1.16249	1.22327	64.1971	1.16249	1.22327	64.1971
455	91	0	7.18318	6.10479	4.26463	4.53967	14.576	4.26463	4.53967	14.576
456	91.2	0	7.74338	6.07081	-2.24201	1.8085	41.8747	2.24201	1.8085	41.8747
457	91.4	0	7.93606	6.46536	-2.07082	-1.58269	26.1341	2.07082	1.58269	26.1341
458	91.6	0	7.80531	6.1747	1.21787	0.832755	63.076	1.30261	0.832755	63.076
459	91.8	0	7.80995	5.91952	1.29512	1.43295	17.8203	1.75835	1.43295	25.5671
460	92	0	7.06012	5.60273	2.13302	-1.06197	51.9416	4.90849	1.06197	51.9416
461	92.2	0	7.97026	5.8735	-4.32139	-0.531042	79.8345	4.32139	0.531042	79.8345
462	92.4	0	8.36261	5.87433	-1.81152	0.0262557	43.7761	1.81152	0.0262557	43.7761
463	92.6	0	8.54294	5.91324	-0.787101	-0.380158	24.5338	0.787101	0.380158	24.5338
464	92.8	0	8.2419	5.95299	2.07184	0.170682	-41.9862	2.07184	0.170682	41.9862
465	93	0	7.70463	5.9229	2.03585	0.158917	-39.545	2.03585	0.317075	39.545
466	93.2	0	7.6987	5.97314	-0.716454	-0.349216	8.99499	0.716454	0.349216	8.99499
467	93.4	0	7.7754	5.99878	-0.507234	-0.0991821	7.78851	0.507234	0.0991821	7.78851
468	93.6	0	7.76191	5.99649	0.217316	-0.0809648	-5.51412	0.236788	0.288412	5.51412
469	93.8	0	7.75715	6.00882	0.0286875	0.073103	-0.950209	0.0286875	0.073103	0.950209
470	94	0	7.77178	5.99854	-0.134266	0.0255456	0.714467	0.134266	0.0255456	0.714467
471	94.2	0	7.76929	5.99462	0.0205318	0.0129994	-0.0926292	0.0205318	0.0273451	0.0926292
472	94.4	0	7.71055	6.09418	0.249013	-0.533852	2.7068	0.249013	0.533852	2.7068
473	94.6	0	7.514	6.2104	1.58581	-0.720962	7.2447	1.58581	0.720962	7.2447
474	94.8	0	7.24248	6.12995	0.855083	1.19403	14.813	0.855083	1.19403	14.813
475	95	0	7.74714	6.39883	-2.86974	-1.29905	3.73091	2.86974	1.29905	6.90573
476	95.2	0	7.86885	5.96559	0.504917	2.14068	-41.2977	0.6145	2.14068	41.2977
477	95.4	0	7.73517	5.86749	0.389497	0.298269	1.48922	0.389497	0.36345	11.3459
478	95.6	0	7.97293	5.36685	-1.60471	4.29734	12.1683	1.60471	4.29734	12.1683
479	95.8	0	8.04704	5.44869	-0.345305	-0.222571	3.56838	0.414096	0.63186	3.56838
480	96	0	8.03168	5.3434	-0.0132811	0.34005	-2.6253	0.413434	0.394743	3.49596
481	96.2	0	8.18177	4.69947	-0.155661	5.1785	-39.3813	0.23372	5.1785	39.3813
482	96.4	0	8.17754	4.09902	0.766114	0.262288	22.1263	0.766114	0.468494	22.1263
483	96.6	0	8.13412	4.36264	-0.112729	-2.27455	79.4035	0.112729	2.27455	79.4035
484	96.8	0	8.41517	4.43079	-1.71212	-0.735603	74.1763	1.71212	0.735603	74.1763
485	97	0	8.44194	4.22827	0.171449	1.22503	-7.50834	0.175554	1.22503	7.50834
486	97.2	0	8.49805	4.34009	0.0836287	-1.03357	30.6999	0.641123	1.03357	34.6592
487	97.4	0	8.15523	3.28299	-1.68264	10.4186	68.8628	1.68264	10.4186	68.8628
488	97.6	0	7.90827	2.96763	0.581795	2.30875	-23.8102	0.581795	2.30875	23.8102
489	97.8	0	7.4231	2.76261	1.93378	1.37829	-7.77865	1.93378	1.37829	7.77865
490	98	0	7.605	1.71613	-3.30166	4.48392	49.5984	3.65906	4.48392	49.5984
491	98.2	0	7.51704	0.864559	-3.6486	4.61105	14.6147	3.6486	4.61105	14.6147
492	98.4	0	7.03531	0.69962	1.49433	2.33232	-7.51297	1.49433	2.33232	7.51297
493	98.6	0	6.7073	0.0574516	-0.125567	3.30052	13.7314	1.57563	3.30052	16.6347
494	98.8	0	5.76115	-0.587172	1.15479	5.88778	45.8064	1.15479	5.88778	45.8064
495	99	0	5.36542	-1.87485	-6.65991	6.07641	121.579	6.65991	6.07641	121.579
496	99.2	0	5.50179	-1.62328	0.536822	-2.95865	-76.5079	0.536822	4.15966	76.5079
497	99.4	0	6.38882	-0.846089	0.0546275	-3.73474	-60.9675	3.63491	3.73474	60.9675
498	99.6	0	5.81778	0.25736	3.42966	-4.03641	-187.175	3.42966	4.03641	187.175
499	99.8	0	5.31171	-0.176291	2.54787	1.04963	-99.6907	2.54787	2.13681	99.6907
500	100	0	4.77992	-0.932317	7.35578	2.18082	-155.431	7.35578	2.18082	155.431
501	100.2	0	4.26537	-0.842942	1.19702	-2.5749	-47.4302	1.19702	2.5749	47.4302
502	100.4	0	4.21312	-1.23529	1.8521	1.01026	-66.2806	1.8521	1.01026	66.2806
503	100.6	0	4.50866	-1.55233	1.75483	1.7207	-90.0989	1.75483	1.7207	90.0989
504	100.8	0	4.52863	-1.941	1.70753	-1.52043	-71.9046	1.70753	1.52043	71.9046
505	101	0	5.378	-2.5378	7.15027	2.45931	-209.744	7.15027	2.45931	209.744
506	101.2	0	6.08943	-1.53938	-0.662489	4.94309	-107.093	0.683705	5.14705	107.093
507	101.4	0	6.29686	-1.39806	2.08535	0.784302	-117.782	2.08535	0.853654	117.782
508	101.6	0	6.57067	-1.31183	0.427373	-0.919129	13.5606	0.427373	0.919129	13.5606
509	101.8	0	6.4557	-1.86568	-1.20407	-2.08808	-21.0699	2.52498	2.08808	21.0699
510	102	0	6.65645	-1.71	0.999624	0.311071	-38.3158	0.999624	0.311071	38.3158
511	102.2	0	7.00484	-0.709974	7.15385	0.529693	-220.056	7.15385	0.529693	220.056
512	102.4	0	7.04059	0.540728	5.91469	0.18068	-102.282	5.91469	0.18068	102.282
513	102.6	0	6.58626	0.506846	-0.525177	2.75637	5.6341	2.78879	2.75637	59.2817
514	102.8	0	6.75217	-0.858833	-5.1497	-1.28641	95.6848	5.1497	2.36104	104.892
515	103	0	6.65686	-0.530994	2.13552	0.675379	-40.4036	2.13552	0.675379	40.4036
516	103.2	0	6.48595	-0.184561	1.54906	1.11639	-1.40663	1.54906	1.11639	1.40663
517	103.4	0	5.8581	0.188692	1.63726	3.46186	32.8291	1.63726	3.46186	32.8291
518	103.6	0	6.28146	0.652605	4.43991	-3.08094	41.8904	4.43991	3.08094	41.8904
519	103.8	0	6.89356	-0.236176	-4.18294	-1.75757	54.4124	6.79425	6.00167	54.4124
520	104	0	5.15647	0.713606	-2.36936	11.8574	68.4128	2.36936	11.8574	68.4128
521	104.2	0	4.556	1.91868	4.41045	2.97407	5.60286	4.41045	2.97407	5.60286
522	104.4	0	3.20247	2.27307	-6.24614	6.62287	-27.818	6.24614	6.62287	27.818
523	104.6	0	2.59896	1.86812	0.0954169	-0.497945	-36.3295	1.65265	1.59842	36.3295
524	104.8	0	2.80327	2.18516	1.92573	-0.326649	-39.8126	1.92573	0.326649	39.8126
525	105	0	2.95885	2.26938	-0.176742	-0.801984	-13.3745	0.176742	0.801984	13.3745
526	105.2	0	2.92749	2.2944	0.189067	0.445275	-18.4669	0.335459	0.673412	18.4669
527	105.4	0	2.46205	2.49603	0.300233	2.64817	-34.0824	0.456453	2.64817	34.0824
528	105.6	0	1.78944	2.57396	-0.157219	3.47916	-89.2315	0.27053	3.47916	89.2315
529	105.8	0	0.831582	2.21249	-1.3765	6.77627	-139.926	1.3765	6.77627	139.926
530	106	0	-0.230763	1.83501	1.22182	5.2937	-118.812	1.33515	5.2937	118.812
531	106.2	0	-0.428089	1.64836	-0.19308	1.03035	-31.6794	1.33706	1.03035	31.6794
532	106.4	0	-0.252463	1.62282	-0.334404	-0.950178	4.63275	0.362815	0.950178	5.14856
533	106.6	0	0.106368	1.76933	-2.09041	-1.93792	-52.8899	2.09041	1.93792	52.8899
534	106.8	0	-0.172114	1.84392	1.21707	0.215043	-5.9498	1.35537	0.220706	27.4016
535	107	0	0.686084	1.76205	-3.32896	-2.30583	141.831	3.32896	2.30583	141.831
536	107.2	0	0.559506	1.79648	0.398214	0.627889	0.164434	1.14039	0.736592	8.91554
537	107.4	0	0.677077	1.37094	-3.40046	1.0428	45.4004	3.40046	1.0428	45.4004
538	107.6	0	0.606475	1.0295	-1.24889	1.58922	1.77565	1.24889	1.58922	13.832
539	107.8	0	-0.145573	1.27647	5.30354	2.17617	-103.356	5.30354	2.17617	103.356
540	108	0	-0.894918	1.65071	1.5843	0.263415	-128.649	1.5843	0.263415	128.649
541	108.2	0	-1.66851	1.70952	3.98072	-0.885383	-72.4509	3.98072	2.14093	72.4509
542	108.4	0	-2.11893	2.07688	1.21816	-2.05678	-52.8341	1.21816	2.05678	52.8341
543	108.6	0	-1.62045	2.69896	-2.48052	-2.25168	-76.9259	4.57712	2.25168	76.9259
544	108.8	0	-2.19849	2.33695	3.94703	-0.160779	-65.9758	3.94703	0.826061	65.9758
545	109	0	-3.12178	2.30564	0.488818	-2.31044	-97.4245	4.19548	2.31044	97.4245
546	109.2	0	-2.90949	2.35514	0.776608	1.24231	-71.3088	0.776608	1.24231	71.3088
547	109.4	0	-2.22461	1.71425	4.88492	4.87423	-166.701	4.88492	4.87423	166.701
548	109.6	0	-0.782336	1.50712	1.62949	4.97012	-67.4626	1.62949	4.97012	67.4626
549	109.8	0	-0.0796114	1.93332	0.305183	2.91694	-41.1465	0.305183	2.91694	41.1465
550	110	0	-0.23398	2.16547	-2.42066	0.0475852	52.8794	2.42066	0.0475852	52.8794
551	110.2	0	-0.361907	2.27848	-0.745186	-0.0184978	15.5928	0.746185	0.426529	16.4922
552	110.4	0	-0.329009	2.26398	0.147581	-0.0669534	-1.32986	0.147581	0.0944793	1.71261
553	110.6	0	-0.45268	2.35363	-0.900188	-0.206868	18.0662	0.900188	0.206868	18.0662
554	110.8	0	-0.48725	2.38357	0.106513	-0.0146975	-0.214649	0.106513	0.0146975	0.214649
555	111	0	-0.452937	2.31616	0.308988	-0.024255	-6.52132	0.395069	0.102315	6.69661
556	111.2	0	-0.4709	2.33539	-0.101463	-0.0213382	2.94846	0.101463	0.0785347	2.94846
557	111.4	0	-0.463927	2.3695	-0.171493	0.156675	1.34745	0.171493	0.156675	1.43401
558	111.6	0	-0.497156	2.42592	-0.427496	-0.0864845	10.5965	0.427496	0.0864845	10.5965
559	111.8	0	-0.5264	2.40539	0.093431	-0.179446	-0.419563	0.256146	0.179446	5.15685
560	112	0	-0.496246	2.38906	0.0443665	0.0996335	-0.316648	0.0501286	0.0996335	0.832257
561	112.2	0	-0.509123	2.40272	-0.0981972	-0.00638249	0.91897	0.0981972	0.0603921	0.91897
562	112.4	0	-0.512193	2.39361	0.0857236	-0.0736952	1.91997	0.0857236	0.0736952	2.62311
563	112.6	0	-0.507625	2.37424	0.0827321	-0.00434517	0.695381	0.0827321	0.00434517	0.695381
564	112.8	0	-0.507861	2.3726	-0.0775267	-0.0727738	1.33092	0.255369	0.198297	4.88231
565	113	0	-0.548667	2.4004	-0.136254	-0.0263866	2.48599	0.136254	0.0263866	2.48599
566	113.2	0	-0.559302	2.42018	-0.0899874	-0.00577782	1.18665	0.0899874	0.0709187	1.22871
567	113.4	0	-0.564074	2.41711	0.0228533	-0.0116326	-0.145601	0.0228533	0.0116326	0.145601
568	113.6	0	-0.558927	2.40636	0.0407609	0.0123119	-0.280901	0.0866901	0.0585225	0.280901
569	113.8	0	-0.558136	2.40608	0.0304853	-0.0220558	0.176352	0.0340529	0.0220558	0.176352
570	114	0	-0.558605	2.41825	-0.0579409	0.0256224	-0.205945	0.0778271	0.0547076	0.302076
571	114.2	0	-0.54515	2.40138	0.178755	0.0376491	-1.40299	0.178755	0.0376491	1.40299
572	114.4	0	-0.640809	2.476	-0.557339	-0.250511	12.0464	0.557339	0.250511	12.0464
573	114.6	0	-0.660275	2.50465	-0.060591	0.0367446	3.34868	0.185816	0.0544124	3.34868
574	114.8	0	-0.64733	2.49208	0.065135	0.0837091	-1.03914	0.065135	0.137794	1.52619
575	115	0	-0.591308	2.47296	0.342594	0.242415	-2.09152	0.342594	0.242415	2.09152
576	115.2	0	-0.601376	2.42543	0.142805	-0.14106	-3.25519	0.216367	0.14106	5.78061
577	115.4	0	-0.589708	2.43033	-0.0517121	0.00413536	1.68839	0.255593	0.209584	4.19793
578	115.6	0	-0.679812	2.52588	-0.673506	-0.094796	13.9557	0.673506	0.124027	13.9557
579	115.8	0	-0.67659	2.51947	0.443885	-0.00971657	-4.59578	0.443885	0.00971657	4.59578
580	116	0	-0.539562	2.39651	1.12347	0.395722	-25.853	1.12347	0.395722	25.853
581	116.2	0	-0.508925	2.38698	-0.457048	-0.0648704	8.71822	0.457048	0.081978	8.71822
582	116.4	0	-0.619085	2.5098	-0.741113	-0.1915	14.935	0.741113	0.1915	14.935
583	116.6	0	-0.624267	2.48546	0.597079	0.0806633	-10.7187	0.597079	0.232989	10.7187
584	116.8	0	-0.523113	2.3782	0.706087	0.165159	-5.28646	0.706087	0.165159	5.28646
585	117	0	-0.453197	2.30073	0.508804	0.118908	-14.3014	0.508804	0.118908	14.3014
586	117.2	0	-0.503557	2.36403	-0.524255	-0.0486073	6.61549	0.524255	0.131312	6.61549
587	117.4	0	-0.67736	2.54024	-1.08618	-0.319368	25.5781	1.08618	0.319368	25.5781
588	117.6	0	-0.712519	2.60338	-0.338855	-0.0156923	4.6427	0.338855	0.0156923	4.6427
589	117.8	0	-0.346025	2.22057	2.42452	0.62692	-49.235	2.42452	0.62692	49.235
590	118	0	-0.30919	2.15566	0.237297	-0.269212	1.39461	0.237297	0.292793	2.86675
591	118.2	0	-0.408317	2.26626	-0.855354	-0.0799215	13.1591	0.855354	0.487551	13.1591
592	118.4	0	-0.517312	2.31544	-0.586009	-0.287269	14.3623	0.586009	0.287269	14.3623
593	118.6	0	-0.597873	2.4597	-0.783935	-0.0424093	18.9451	0.783935	0.169364	18.9451
594	118.8	0	-0.513197	2.31657	1.22921	0.207718	-23.4319	1.22921	0.3353	23.4319
595	119	0	-0.573156	2.44927	-1.64976	-0.163936	29.1953	1.64976	0.201342	29.1953
596	119.2	0	-0.682483	2.59857	-0.451041	-0.0586715	8.45728	0.451041	0.0586715	8.45728
597	119.4	0	-0.683955	2.60441	0.00676575	0.00977275	0.723328	0.124611	0.00977275	1.62
598	119.6	0	-0.557322	2.40925	0.872333	0.0782239	-18.5729	1.32675	0.179442	23.7334
599	119.8	0	-0.651343	2.52821	-0.70646	-0.166967	16.3483	0.70646	0.166967	16.3483
600	120	0	-0.660855	2.53575	0.231026	0.0970987	-0.828341	0.231026	0.0970987	0.828341
601	120.2	0	-0.631165	2.49409	0.242195	0.0469646	-7.77989	0.242195	0.0469646	7.77989
602	120.4	0	-0.628831	2.50948	-0.00483972	0.0858524	-0.689815	0.287029	0.140641	5.53064
603	120.6	0	-0.560751	2.46702	0.233147	0.134322	-3.13667	0.236642	0.134322	4.60317
604	120.8	0	-0.578645	2.50657	-0.190228	-0.0143094	2.25844	0.190228	0.0428214	2.25844
605	121	0	-0.587645	2.50567	-0.0289286	-0.0454405	0.74145	0.0289286	0.0454405	0.74145
606	121.2	0	-0.572293	2.50171	0.0606951	0.0672569	-0.299615	0.0606951	0.0672569	0.299615
607	121.4	0	-0.546864	2.48916	0.0744194	0.107027	-3.23562	0.126026	0.107027	3.23562
608	121.6	0	-0.469033	2.38698	0.794121	0.0577041	-12.1945	0.794121	0.0577041	12.1945
609	121.8	0	-0.402862	2.33207	0.272349	0.211664	-9.39216	0.272349	0.211664	9.39216
610	122	0	-0.376028	2.32944	0.0620851	0.109309	-2.59119	0.10659	0.109309	3.1233
611	122.2	0	-0.53547	2.50945	-1.16571	-0.26769	23.4012	1.16571	0.26769	23.4012
612	122.4	0	-0.602235	2.58395	-0.335308	-0.0794488	7.44463	0.335308	0.0794488	7.44463
613	122.6	0	-0.620092	2.59321	-0.0468615	-0.0749106	-0.0703743	0.0468615	0.0749106	0.0703743
614	122.8	0	-0.556609	2.53268	0.315918	0.134249	-7.17911	0.507983	0.134249	10.7299
615	123	1	-0.557854	2.53572	0.0506183	0.0173491	-0.552436	0.0506183	0.0607326	0.740552
616	123.2	1	-0.543159	2.52567	0.0886118	0.0501024	-1.2978	0.0886118	0.0806695	1.2978
617	123.4	1	-0.536327	2.51905	0.00668944	-0.0391431	-0.844753	0.00668944	0.0391431	0.844753
618	123.6	1	-0.532114	2.5246	-0.0269717	0.0113488	0.267118	0.029178	0.0772384	0.610004
619	123.8	1	-0.528027	2.53029	0.00912082	0.0396769	0.550826	0.0264737	0.0573844	0.550826
620	124	1	-0.518374	2.52319	0.0443607	0.0350168	0.552228	0.0443607	0.0350168	0.609243
621	124.2	1	-0.51457	2.51722	0.0504014	-0.00939721	-0.307525	0.0504014	0.00939721	0.307525
622	124.4	1	-0.517457	2.51731	-0.0050595	-0.00611515	-0.123054	0.0098374	0.0259667	0.123054
623	124.6	1	-0.51802	2.52077	-0.0263552	0.016198	0.267929	0.0263552	0.0490772	0.267929
624	124.8	1	-0.507186	2.52002	0.0687661	0.0485287	-0.017731	0.0687661	0.0485287	0.978891
625	125	1	-0.468878	2.49961	0.157697	0.124743	-2.09151	0.157697	0.124743	2.09151
626	125.2	1	-0.46217	2.47272	0.17077	-0.141323	-1.25029	0.17077	0.141323	1.25029
627	125.4	1	-0.464658	2.48771	-0.0716344	0.0220755	0.108587	0.0716344	0.0220755	0.108587
628	125.6	1	-0.460194	2.48358	0.0603938	0.00691288	-0.00859081	0.0603938	0.0119292	0.0971211
629	125.8	1	-0.456568	2.48194	-0.00381782	0.032598	-0.644239	0.0400913	0.0501183	0.644239
630	126	0	-0.450323	2.47437	0.0665548	-0.0245273	-1.1391	0.0665548	0.0245273	1.1391
631	126.2	0	-0.445335	2.48071	-0.0258793	0.0308752	0.863776	0.0258793	0.0376133	0.863776
632	126.4	0	-0.431282	2.50529	-0.109639	0.19306	-1.00645	0.112647	0.19306	1.00645
633	126.6	0	-0.447189	2.49326	0.185674	-0.310181	-4.15125	0.28909	0.310181	4.15125
634	126.8	0	-0.292194	2.34447	1.60408	0.765465	-35.4487	1.60408	0.765465	35.4487
635	127	0	-0.293811	2.35911	0.0562827	0.0574801	0.387663	0.399653	0.0574801	3.38483
636	127.2	0	-0.16561	2.31728	0.728905	0.59426	-18.0677	0.757538	0.59426	25.8743
637	127.4	0	0.31191	2.19835	2.50659	1.55625	-35.995	2.50659	1.55625	35.995
638	127.6	0	0.824704	2.14216	1.35779	1.69121	-19.6458	1.35779	1.69121	19.6458
639	127.8	0	0.842929	2.38313	-0.525975	0.558289	18.4835	1.0295	1.67667	18.4835
640	128	0	1.49091	2.84612	-0.465416	8.60992	104.378	2.92064	9.8676	104.378
641	128.2	0	3.00675	3.26005	0.254553	3.02173	-12.2837	0.635226	3.02173	12.2837
642	128.4	0	4.39688	3.96949	-2.08106	12.0326	101.954	2.08106	12.0326	101.954
643	128.6	0	6.19727	5.15664	-5.03424	10.3602	30.3336	5.03424	10.3602	63.8871
644	128.8	0	6.98864	5.09094	1.01614	1.43062	-42.5225	1.30437	1.43062	42.5225
645	129	0	6.81267	5.00161	0.773949	-1.70944	7.55375	1.20923	1.70944	10.0554
646	129.2	0	6.47499	5.1516	-1.66275	-0.168672	-6.44696	1.66275	1.4611	23.8784
647	129.4	0	6.87889	4.70788	5.20977	1.32965	-108.373	5.20977	1.32965	108.373
648	129.6	0	7.07299	4.09023	2.819	-1.26303	-120.751	2.819	1.26303	120.751
649	129.8	0	7.14467	3.96118	1.28596	0.696184	-88.5876	1.36376	1.67995	88.5876
650	130	0	7.98693	4.37528	3.43024	2.37543	-66.57	3.43024	2.37543	66.57
651	130.2	0	7.57843	3.97358	-5.56568	-3.98294	-87.3287	5.56568	3.98294	87.3287
652	130.4	0	7.55051	4.51315	0.0525882	3.11746	-34.5163	1.22378	3.11746	34.5163
653	130.6	0	7.29615	4.64814	-1.16926	0.634553	-26.7227	1.16926	0.981902	67.2934
654	130.8	0	6.89107	4.60201	-1.48614	0.253658	16.3376	1.48614	0.436578	16.3376
655	131	0	6.63947	4.92316	-0.598243	3.0436	21.8404	0.598243	3.0436	21.8404
656	131.2	0	6.51198	5.08903	-0.632778	1.4582	30.774	0.632778	1.4582	30.774
657	131.4	0	6.6168	5.63473	2.04029	2.97666	-41.8634	2.04029	2.97666	41.8634
658	131.6	0	6.72465	6.8775	0.236055	3.96463	-14.5415	4.65168	3.96463	14.5415
659	131.8	0	6.64835	7.26686	2.85112	2.96787	4.15819	2.85112	2.96787	4.15819
660	132	0	6.67469	7.02396	-0.22253	-1.78385	0.0367066	0.487531	1.78385	3.39759
661	132.2	0	6.77907	7.13469	0.101221	1.60708	21.1609	1.6487	1.60708	21.1609
662	132.4	0	6.45199	7.04699	-1.43732	-0.607053	40.0627	1.43732	0.628472	40.0627
663	132.6	0	6.31998	7.12732	-0.361636	0.84846	51.7867	0.361636	0.84846	51.7867
664	132.8	0	6.23181	6.97168	-1.54466	-1.95336	12.4181	3.19311	3.0046	15.9716
665	133	0	6.05637	6.60476	0.385591	-0.50292	-16.4818	0.563245	0.50292	16.4818
666	133.2	0	5.29884	6.38525	-4.23735	-0.864152	94.8115	4.23735	2.26126	94.8115
667	133.4	0	5.25106	7.01953	0.0629581	2.92118	-39.6169	0.386535	2.92118	39.6169
668	133.6	0	5.8438	7.06048	4.76032	-0.757591	-164.777	4.76032	0.757591	164.777
669	133.8	0	6.33468	6.9472	2.50067	-1.45087	-76.2521	2.50067	1.45087	76.2521
670	134	0	6.73662	7.0587	1.80841	-0.0391517	-29.2041	1.80841	0.412036	29.2041
671	134.2	0	7.12052	7.34145	2.14985	0.284368	-60.4216	2.14985	0.521985	60.4216
672	134.4	0	7.16143	7.36887	-0.624381	-0.429502	-30.8989	0.624381	0.429502	30.8989
673	134.6	0	6.98422	6.31279	-5.74142	-5.90713	63.5303	5.74142	6.28939	63.5303
674	134.8	0	6.73364	5.6884	-0.139876	2.11751	-60.6312	1.68286	2.11751	60.6312
675	135	0	6.59229	6.73634	5.55943	2.76291	-191.382	5.55943	2.76291	191.382
676	135.2	0	6.57734	7.86337	5.31427	-0.983432	-79.9078	5.31427	0.983432	79.9078
677	135.4	0	7.12805	7.37983	-4.24491	-3.27757	12.7091	4.24491	3.27757	12.7778
678	135.6	0	7.26572	7.51013	3.51526	0.532377	-99.1339	3.51526	0.532377	99.1339
679	135.8	0	6.61972	8.38915	3.63369	-0.662809	-71.2777	3.63369	1.37427	71.2777
680	136	0	6.66839	8.50199	0	0	0	0	0	0
681	136.2	0	6.66839	8.50199	0	0	0	0	0	0
682	136.4	0	6.47642	8.23989	0.0272556	2.47557	-36.5782	0.244943	2.47557	36.5782
683	136.6	0	5.90348	7.73062	1.24319	2.55066	-52.761	1.24319	2.55066	52.761
684	136.8	0	5.37417	6.9733	1.99825	6.98519	-133.168	1.99825	6.98519	133.168
685	137	0	5.17753	6.82667	0.903559	0.974639	-15.5758	0.903559	0.974639	15.5758
686	137.2	0	5.61229	6.68193	-3.12009	-0.279012	50.6292	3.12009	1.28815	50.6292
687	137.4	0	5.98452	6.70932	-0.285775	-0.162087	1.41875	1.09671	0.189402	20.5452
688	137.6	0	6.98854	6.72151	-8.48034	-3.62622	159.622	8.48034	3.62622	159.622
689	137.8	0	6.98854	6.72151	0	0	0	0	0	0
690	138	0	6.46186	6.14974	2.14513	4.54141	-127.227	2.14513	4.54141	127.227
691	138.2	0	6.5719	4.58668	-1.38367	5.05229	-36.856	1.38367	7.56811	68.6912
692	138.4	0	6.32251	4.23806	2.82835	3.4251	-247.745	2.82835	3.4251	247.745
693	138.6	0	6.46369	3.89956	0	0	0	0	0	0
694	138.8	0	6.46369	3.89956	0	0	0	0	0	0
695	139	0	6.46369	3.89956	0	0	0	0	0	0
696	139.2	0	6.90899	2.98549	3.09495	4.28054	-73.8339	3.09495	4.28054	73.8339
697	139.4	0	8.41193	1.41503	13.4542	11.6101	-250.102	13.4542	11.6101	250.102
698	139.6	0	9.61132	0.452877	6.78596	3.75231	-65.7596	6.78596	3.75231	94.2855
699	139.8	0	9.31056	1.4191	-5.34825	-0.159953	91.8166	5.34825	1.67599	91.8166
700	140	0	10.018	2.49802	-5.02009	3.90805	37.8985	5.02009	3.90805	37.8985
701	140.2	0	10.3295	3.04062	-2.84545	1.36992	25.2636	2.84545	1.36992	25.2636
702	140.4	0	10.5089	3.13744	-0.58668	1.12186	15.2335	0.58668	1.12186	15.2335
703	140.6	0	10.892	3.03332	0.403267	1.65549	4.21798	0.403267	1.65549	4.21798
704	140.8	0	11.9049	3.37097	-2.51402	5.76203	-31.6742	2.51402	5.76203	31.6742
705	141	0	12.941	3.48848	0.207205	5.68121	19.0668	0.207205	5.68121	19.0668
706	141.2	0	13.4508	3.74579	-2.07226	3.85569	49.4853	2.07226	3.85569	49.4853
707	141.4	0	13.9424	3.84207	-0.037305	0.364726	-2.73076	0.2038	0.3689	3.55758
708	141.6	0	13.9742	3.75569	0.413991	0.372439	-8.02959	0.413991	0.372439	8.02959
709	141.8	0	14.0954	3.8311	-0.820917	0.311091	4.0948	0.820917	0.311091	4.0948
710	142	0	13.9266	4.51634	-5.2399	-2.26829	-73.1011	5.2399	2.26829	73.1011
711	142.2	0	13.772	4.34263	0.905976	-1.04295	-68.8838	0.905976	1.04295	68.8838
712	142.4	0	13.7359	3.95737	1.74475	-0.410625	-44.539	1.74475	0.410625	44.539
713	142.6	0	13.8807	3.83963	0.403228	0.674895	4.61651	0.459778	0.674895	10.9987
714	142.8	0	13.8751	3.97072	-1.05672	-0.00996423	32.0163	1.05672	0.00996423	32.0163
715	143	0	13.6326	4.21161	-1.71776	-0.720892	37.3741	1.71776	0.891913	37.3741
716	143.2	0	13.9812	3.96727	2.45576	1.30764	-101.389	2.45576	1.30764	101.389
717	143.4	0	14.0544	4.22553	-2.99256	1.54419	-80.2108	4.25396	1.54419	80.2108
718	143.6	0	13.9054	4.54691	0.59613	-0.43103	-17.1784	0.59613	0.43103	17.1784
719	143.8	0	13.7621	4.6972	-1.8995	0.262075	10.4531	2.07666	0.268132	13.6471
720	144	0	13.3422	5.21187	-2.44251	0.591805	15.1377	2.44251	0.591805	15.1377
721	144.2	0	13.0691	5.26545	-0.33483	-1.47381	-19.5376	1.00544	1.47381	26.291
722	144.4	0	13.1726	4.98473	1.9759	-0.0853487	-12.8382	1.9759	0.0853487	12.8382
723	144.6	0	13.2673	4.73393	1.22104	-0.776507	4.23718	1.22104	0.776507	5.53599
724	144.8	0	13.0012	4.42756	-0.416746	-2.42304	26.8414	0.416746	2.42304	26.8414
725	145	0	13.301	4.64784	1.30693	2.65485	-93.2498	1.30693	2.65485	93.2498
726	145.2	0	13.1545	4.65105	-2.63072	-0.997277	-53.8898	2.63072	0.997277	53.8898
727	145.4	0	13.5551	5.70245	1.55068	6.92274	-148.561	2.07705	6.92274	148.561
728	145.6	0	13.7624	6.79204	4.42408	2.63609	-150.754	4.42408	2.63609	150.754
729	145.8	0	13.0365	7.54105	-2.59759	5.42501	-16.6342	4.33826	5.42501	30.9945
730	146	0	12.1098	7.51134	-1.24915	2.04293	23.1067	1.24915	2.04293	23.1067
731	146.2	0	11.7922	7.37884	-1.70624	0.590257	21.0366	1.70624	0.590257	21.0366
732	146.4	0	11.626	7.5236	0.00451205	1.2114	18.9356	0.227904	1.2114	18.9356
733	146.6	0	10.9586	7.76052	-2.27626	2.79521	35.5028	2.27626	2.79521	35.5028
734	146.8	0	10.6627	7.79174	-0.547356	0.763013	8.60845	0.547356	0.763013	8.60845
735	147	0	10.461	8.0062	-0.112093	1.97016	3.40187	0.112093	1.97016	3.40187
736	147.2	0	10.3767	8.11943	-0.0651046	0.853639	8.11123	0.0651046	0.853639	8.11123
737	147.4	0	10.4067	8.08177	-0.014183	-0.494775	21.6512	0.265815	0.494775	21.6512
738	147.6	0	10.0021	7.95546	-2.16929	0.23592	50.5149	2.16929	0.23592	50.5149
739	147.8	0	9.70691	8.20349	-1.53407	2.50408	112.009	1.53407	2.50408	112.009
740	148	0	9.33152	8.47859	-2.55563	1.80996	49.0421	2.55563	1.80996	49.0421
741	148.2	0	9.30395	8.62886	0.937694	0.32519	-21.8866	0.937694	0.95387	39.0803
742	148.4	0	9.3779	8.69178	0	0	0	0	0	0
743	148.6	0	9.3779	8.69178	0	0	0	0	0	0
744	148.8	0	8.88793	8.3552	-2.64542	-1.78906	-4.23678	2.64542	1.78906	25.9651
745	149	0	8.27169	8.09115	-2.9526	-2.19275	59.6892	2.9526	2.19275	59.6892
746	149.2	0	8.0517	7.3391	1.77023	-3.59045	-121.658	3.02491	3.59045	121.658
747	149.4	0	8.5223	7.41408	2.05329	1.41361	-45.5151	2.05329	1.41361	45.5151
748	149.6	0	8.77309	7.90893	2.99722	2.06653	-43.9628	2.99722	2.06653	43.9628
749	149.8	0	9.11984	8.47926	1.3091	1.47391	-13.896	1.3091	1.47391	20.3424
750	150	0	8.04245	7.91016	-6.2431	-2.00025	171.533	6.2431	2.00025	171.533
751	150.2	0	7.33879	7.95526	-3.19964	-0.420898	96.398	3.19964	0.420898	96.398
752	150.4	0	6.59275	8.21551	-4.60164	-1.3858	105.054	4.60164	1.3858	105.054
753	150.6	0	6.35311	9.37542	-5.79257	1.65639	162.102	5.79257	1.65639	162.102
754	150.8	0	6.9683	7.93209	10.2867	-0.75426	-95.2855	10.2867	3.68963	95.2855
755	151	0	8.13855	6.89041	3.14091	4.26472	39.7414	5.29218	4.26472	39.7414
756	151.2	0	8.1367	7.36337	-2.72977	-0.0815175	86.2349	2.72977	0.0815175	86.2349
757	151.4	0	7.99564	7.45156	-0.896277	-1.16338	114.689	0.896277	1.16338	114.689
758	151.6	0	7.99564	7.45156	0	0	0	0	0	0
759	151.8	0	8.87107	7.09765	2.49591	6.75797	-42.2218	2.49591	6.75797	42.2218
760	152	0	9.77983	7.2871	-2.05706	2.16602	59.175	2.05706	2.16602	59.175
761	152.2	0	10.1704	7.71919	-2.16839	1.93917	40.3295	2.16839	1.93917	40.3295
762	152.4	0	10.494	7.99266	-1.39166	1.00027	22.516	1.39166	1.00027	22.516
763	152.6	0	10.5576	8.06169	-0.161294	0.262424	-1.8397	0.174394	0.262424	1.8397
764	152.8	0	10.5962	8.02692	0.222812	0.176746	-2.37585	0.222812	0.176746	2.37585
765	153	0	10.5595	7.9843	0.439504	-0.154446	-0.587928	0.453185	0.154446	0.587928
766	153.2	0	10.5185	7.87146	0.351079	0.0026866	0.0397711	0.351079	0.187939	1.11611
767	153.4	0	10.5652	7.88511	-0.200626	0.133436	0.299962	0.200626	0.167852	1.05091
768	153.6	0	10.5436	7.88824	0.109596	-0.17531	-1.73283	0.109596	0.17531	1.73283
769	153.8	0	10.5021	7.90687	-0.0758052	-0.243206	-0.022575	0.0758052	0.243206	2.00931
770	154	0	10.4981	7.9384	-0.159538	-0.0242132	1.47328	0.159538	0.0838447	1.47328
771	154.2	0	10.5164	7.86164	0.464879	0.200143	-2.84641	0.464879	0.200143	3.01889
772	154.4	0	10.489	7.85449	-0.107923	-0.144351	-0.912232	0.167285	0.144351	5.75071
773	154.6	0	10.5107	7.88811	-0.190131	0.145269	4.68308	0.190131	0.145269	4.68308
774	154.8	0	10.4679	7.89916	-0.0486227	-0.207302	1.84279	0.105885	0.207302	1.84279
775	155	0	10.5134	7.83163	0.348108	0.225571	-3.83165	0.348108	0.395442	3.83165
776	155.2	0	10.4842	7.88277	-0.211205	-0.127151	4.50508	0.380613	0.13428	7.06697
777	155.4	0	10.5096	7.83044	0.319866	0.310759	0.736683	0.319866	0.310759	0.736683
778	155.6	0	10.4973	7.81622	0.151755	-0.0645795	0.580516	0.165104	0.0645795	1.24496
779	155.8	0	10.4969	7.72708	0.392043	0.176105	-4.88332	0.392043	0.176105	4.88332
780	156	0	10.5122	7.80507	-0.416459	-0.0240241	4.17869	0.495349	0.230746	5.3646
781	156.2	0	10.5135	7.82512	-0.214812	-0.12883	-0.906261	0.214812	0.12883	0.906261
782	156.4	0	10.5362	7.82861	0.0560655	0.219457	1.24275	0.31334	0.278881	1.71683
783	156.6	0	10.6574	7.3283	2.41378	0.887193	0.304169	2.41378	0.887193	8.21882
784	156.8	0	9.9907	7.2779	-0.010767	-4.74362	102.594	3.10333	4.74362	102.594
785	157	0	9.99585	7.68982	-2.17774	1.33273	84.2852	2.17774	1.33273	84.2852
786	157.2	0	10.5537	8.33977	-4.19134	-1.20962	104.829	4.19134	1.20962	104.829
787	157.4	0	10.7072	8.3415	0.493275	0.966919	-3.61151	1.94203	1.00143	34.8259
788	157.6	0	10.2738	7.95634	2.64888	0.395695	-33.2655	2.64888	0.395695	33.2655
789	157.8	0	10.1552	7.91071	-0.590818	-0.353131	22.8663	0.590818	0.353131	22.8663
790	158	0	10.2798	7.84556	-0.387949	0.482955	28.7093	0.387949	0.482955	28.7093
791	158.2	0	10.2798	7.84556	0	0	0	0	0	0
792	158.4	0	10.2981	7.64024	0.461829	1.75639	4.45541	0.461829	1.75639	4.45541
793	158.6	0	10.2731	7.29125	0.434336	0.557247	-2.59969	0.434336	0.557247	2.75045
794	158.8	0	10.222	7.29177	0.338468	-0.209581	-1.48266	0.338468	0.209581	1.48266
795	159	0	10.0737	7.29469	0.974946	-0.245583	-6.91463	0.974946	0.245583	6.91463
796	159.2	0	10.0397	7.29758	-0.419753	-0.100931	8.45589	0.419753	0.100931	8.45589
797	159.4	0	10.0756	7.32378	0.26138	-0.0439458	-2.44451	0.785216	0.0471258	2.44451
798	159.6	0	10.2054	7.20267	-1.17602	1.48582	-34.5574	1.17602	1.48582	34.5574
799	159.8	0	9.88237	7.44529	0.599677	-1.98808	21.2766	1.67826	1.98808	25.8544
800	160	0	9.61713	7.49901	2.41712	-0.00552303	0.850234	2.41712	0.69293	3.99678
801	160.2	0	10.9916	6.11396	-4.45196	7.77047	35.9291	7.53122	7.77047	35.9291
802	160.4	0	10.9172	5.97506	-0.647238	0.313899	11.471	0.647238	0.313899	11.471
803	160.6	0	11.2271	5.65704	-1.77463	3.10237	19.3303	1.77463	3.10237	19.3303
804	160.8	0	11.4429	5.23991	-0.322612	0.400806	0.296879	0.322612	0.400806	0.433566
805	161	0	11.4619	5.23023	0.0962235	0.0171428	9.19339	0.0962235	0.0998913	9.19339
806	161.2	0	11.5088	5.25287	-0.501843	-0.137319	4.13251	0.501843	0.137319	4.13251
807	161.4	0	11.503	5.24689	-0.0107324	0.0399039	7.3653	0.138319	0.0399039	7.3653
808	161.6	0	11.4724	5.26833	0.243109	-0.0888106	0.855877	0.243109	0.178517	1.73272
809	161.8	0	11.3714	5.31017	0.706451	-0.238503	-0.486734	0.706451	0.238503	1.05637
810	162	0	11.2484	5.34753	0.402879	-0.298029	-4.07428	0.402879	0.298029	4.07428
811	162.2	0	11.2232	5.35933	0.203431	-0.0288128	-13.9032	0.203431	0.152441	13.9032
812	162.4	0	11.0653	5.27312	1.02274	0.50899	-4.012	1.02274	0.50899	4.012
813	162.6	0	10.9534	5.182	0.184288	0.174824	-9.89513	0.184288	0.174824	9.89513
814	162.8	0	11.028	5.20486	-0.528951	-0.154704	1.2618	0.528951	0.154704	1.39659
815	163	0	11.0511	5.22893	0.0685315	-0.0863458	-0.647703	0.0685315	0.0863458	0.647703
816	163.2	0	11.0451	5.22331	0.0431448	0.0766743	-2.35057	0.0431448	0.146224	2.35057
817	163.4	0	11.0741	5.1322	-0.320433	0.472207	2.61904	0.622723	0.472207	2.61904
818	163.6	0	11.3303	5.16468	-0.982047	-0.0207975	12.6256	0.982047	0.452954	12.6256
819	163.8	0	11.3497	5.12642	0.0192224	0.134242	-3.34514	0.0192224	0.134242	3.34514
820	164	0	11.3147	5.0549	0.178851	0.481924	-0.516923	0.189039	0.481924	0.54292
821	164.2	0	11.3334	5.04145	-0.0975408	-0.200025	0.618193	0.0975408	0.200025	0.664564
822	164.4	0	11.3588	5.04415	-0.110593	0.190371	2.42062	0.110593	0.242021	2.42062
823	164.6	0	11.3891	5.00965	-0.201039	0.107197	1.61159	0.201039	0.107197	1.61159
824	164.8	0	11.4744	5.0508	-0.368659	-0.179005	2.41303	0.4438	0.179005	2.41303
825	165	0	11.4506	5.03296	0.0618442	0.106053	0.125629	0.176793	0.106053	1.32963
826	165.2	0	11.4543	5.02998	0.0208111	0.00845261	-3.64251	0.0208111	0.00845261	3.64251
827	165.4	0	11.4442	5.01996	0.0802537	0.0742277	-3.05851	0.0802537	0.0742277	3.05851
828	165.6	0	11.4437	4.99475	-0.0223073	0.135315	-1.60619	0.114143	0.135315	1.60619
829	165.8	0	11.4551	4.98661	-0.0296636	0.015934	0.934338	0.0379701	0.015934	0.934338
830	166	0	11.467	4.97254	-0.104825	0.012132	1.25394	0.195505	0.225897	1.25394
831	166.2	0	11.4977	4.9905	-0.132291	-0.0285342	-0.772705	0.132291	0.0285342	0.772705
832	166.4	0	11.4805	4.97808	0.148361	0.0877295	0.45697	0.148361	0.0877295	0.45697
833	166.6	0	11.4698	4.97206	-0.0134982	-0.00986969	-0.208289	0.0372802	0.0377397	0.48922
834	166.8	0	11.4763	4.96552	-0.0325197	0.138139	-0.397232	0.0325197	0.318022	0.422418
835	167	0	11.4961	4.92989	-0.0777038	0.028889	0.0686439	0.0777038	0.112148	0.0686439
836	167.2	0	11.5015	4.92971	-0.0376133	0.0471536	0.0589685	0.0376133	0.0471536	0.0589685
837	167.4	0	11.5249	4.87273	-0.205137	0.331423	1.75907	0.285991	0.331423	1.75907
838	167.6	0	11.5608	4.87444	-0.0060184	-0.0311544	-0.135396	0.122508	0.179479	0.340001
839	167.8	0	11.5403	4.8051	0.12517	0.462092	-0.874707	0.12517	0.462092	1.04068
840	168	0	11.3929	4.47684	1.44011	2.37809	2.47427	1.44011	2.37809	2.47427
841	168.2	0	11.5067	3.89649	-0.652677	3.78616	-2.3983	0.771995	3.78616	2.3983
842	168.4	0	11.719	3.46643	-0.501069	1.0243	-4.7355	0.501069	1.0243	4.7355
843	168.6	0	11.7406	3.22039	0.0455683	1.11676	0.294554	0.287974	1.11676	0.561966
844	168.8	0	11.9963	2.77372	-1.71738	3.58112	0.849405	1.71738	3.58112	0.849405
845	169	0	12.8122	1.95016	-4.14916	4.13711	11.3443	4.14916	4.13711	11.3443
846	169.2	0	12.8525	1.78781	1.33737	0.730706	-32.9214	1.33737	0.730706	32.9214
847	169.4	0	12.8395	1.16265	1.94677	4.99004	-103.072	3.31857	6.08923	103.072
848	169.6	0	12.7984	0.11451	2.06483	2.36602	-44.1861	2.06483	2.36602	44.1861
849	169.8	0	12.9965	-0.171563	0.178502	1.25387	-4.44817	0.178502	2.33451	26.7685
850	170	0	13.3877	-0.774062	-0.661789	5.68107	70.0422	1.58809	5.68107	70.0422
851	170.2	0	14.6419	-1.71022	-1.7916	3.92192	9.27537	5.57972	3.92192	36.275
852	170.4	0	14.426	-1.96911	0.725812	0.963231	-11.6472	0.725812	0.963231	11.6472
853	170.6	0	14.9242	-2.27072	-3.7108	1.76873	141.704	3.7108	1.76873	141.704
854	170.8	0	15.8444	-2.96896	-4.47399	2.90671	149.172	4.47399	2.90671	149.172
855	171	0	15.1945	-3.67586	2.62835	3.27111	-27.0507	2.62835	3.27111	27.0507
856	171.2	0	14.8796	-3.56962	0.443296	0.17654	5.30199	0.599974	0.31563	17.2292
857	171.4	0	14.7105	-3.39436	1.59816	-0.258184	-13.2844	1.59816	0.258184	13.2844
858	171.6	0	14.5304	-2.98181	1.89405	-1.5224	0.0323754	1.89405	1.5224	6.4183
859	171.8	0	14.7011	-2.69172	0.116109	-1.22636	44.586	0.307792	1.22636	44.586
860	172	0	15.3185	-3.44093	-7.59165	-1.82663	182.202	7.59165	1.82663	182.202
861	172.2	0	15.6089	-4.89945	-7.41106	-0.0060539	176.947	7.41106	0.0060539	176.947
862	172.4	0	15.2514	-5.1693	-2.21012	1.49352	37.7241	2.21012	1.49352	37.7241
863	172.6	0	14.8085	-5.11859	-0.0909178	1.86424	-5.81932	0.292248	1.86424	5.99131
864	172.8	0	14.527	-4.84634	0.686687	1.48049	-21.8586	0.686687	1.48049	21.8586
865	173	0	14.4246	-4.55925	1.79309	0.992742	-22.3214	1.79309	0.992742	22.3214
866	173.2	0	14.2859	-4.32456	0.947276	1.06761	-10.7864	0.947276	1.06761	10.7864
867	173.4	0	13.6255	-4.37292	-2.66323	4.55168	29.9244	3.15114	4.55168	31.2855
868	173.6	0	12.769	-4.46964	-0.42381	1.8466	8.78989	0.42381	1.8466	8.78989
869	173.8	0	12.4968	-4.51203	-0.944799	1.07624	12.915	0.944799	1.07624	12.915
870	174	0	12.2625	-4.60602	-1.03601	0.895224	14.2623	1.03601	0.895224	14.2623
871	174.2	0	12.0314	-5.22252	-2.32734	-0.391863	-19.4222	3.72364	0.773214	19.4222
872	174.4	0	12.1262	-5.38801	-0.957409	-1.1208	12.3881	0.957409	1.1208	12.3881
873	174.6	0	12.1629	-5.45278	-0.128298	0.142576	5.98479	0.128298	0.142576	5.98479
874	174.8	0	12.1742	-5.49505	-0.179175	-0.131383	2.88331	0.179175	0.131383	2.88331
875	175	0	12.1802	-5.50465	0.0752176	-0.0372985	-1.02376	0.173518	0.060889	1.02376
876	175.2	0	12.0784	-5.38749	0.163677	0.929976	5.58167	0.225342	0.929976	5.58167
877	175.4	0	11.7734	-5.04457	0.323931	2.05248	31.3605	1.48394	2.05248	31.3605
878	175.6	0	11.2442	-4.35246	2.48063	6.62405	42.23	2.48063	6.62405	42.23
879	175.8	0	11.1182	-4.4954	-0.950731	-0.0671444	14.4591	0.950731	0.150351	14.4591
880	176	0	11.0847	-4.41705	0.523621	0.654553	8.66447	0.596753	0.654553	9.59271
881	176.2	0	11.1904	-4.21954	0.866914	0.0257202	2.88762	0.866914	0.194708	4.30489
882	176.4	0	11.6052	-4.63583	0.00552778	-5.10023	48.6116	0.00552778	5.10023	48.6116
883	176.6	0	12.1515	-5.35418	0.508787	-4.92272	80.0857	0.511351	4.92272	80.0857
884	176.8	0	11.8253	-5.77879	-2.89695	-0.293997	91.3851	2.89695	1.75975	91.3851
885	177	0	10.8263	-5.64555	-4.45505	-0.478192	87.6276	4.45505	0.478192	87.6276
886	177.2	0	10.4538	-5.62389	-1.32691	-0.60272	67.0343	1.32691	0.60272	67.0343
887	177.4	0	10.4079	-5.52784	-0.0989115	0.158599	32.694	1.27025	0.586227	32.7088
888	177.6	0	10.6192	-5.67085	1.37167	0.295119	-19.7072	1.37167	0.397586	19.7072
889	177.8	0	11.427	-5.40901	2.76837	4.86158	-3.53358	2.76837	4.86158	31.9304
890	178	0	11.3239	-4.79098	-4.96062	-1.07496	152.692	4.96062	1.07496	152.692
891	178.2	0	10.6967	-4.40873	-4.40022	-2.40682	169.906	4.40022	2.40682	169.906
892	178.4	0	10.5127	-3.84261	-1.26475	0.430481	39.5788	1.2838	0.430481	39.5788
893	178.6	0	10.7168	-3.96475	0.760688	0.860634	-20.4083	0.760688	0.860634	20.4083
894	178.8	0	10.8601	-4.41004	3.34488	0.906204	-71.3803	3.34488	0.906204	71.3803
895	179	0	11.065	-4.72598	1.46204	0.628942	-34.223	1.76	0.644003	37.9381
896	179.2	0	10.9926	-4.63329	-0.572577	-0.278298	13.3597	0.572577	0.278298	13.3597
897	179.4	0	10.8772	-4.44571	-1.04629	-0.394838	22.717	1.04629	0.394838	22.717
898	179.6	0	10.8469	-4.34868	-0.14738	0.0703226	3.7419	0.14738	0.117408	3.7419
899	179.8	0	10.9252	-4.36279	0.243922	0.57836	-12.4398	0.243922	0.57836	12.4398
900	180	0	10.9227	-4.44757	0.300369	-0.0796565	-5.04432	0.572895	0.0796565	9.05201
901	180.2	0	10.8908	-4.41463	-0.13337	-0.110454	4.40988	0.13337	0.110454	4.40988
902	180.4	0	10.8831	-4.37593	-0.182281	0.0645887	2.23161	0.182281	0.204851	2.23161
903	180.6	0	10.8868	-4.3899	0.220973	-0.116176	-0.909659	0.220973	0.116176	0.909659
904	180.8	0	10.8749	-4.4007	0.0334143	-0.0605758	-0.493572	0.064688	0.0605758	0.493572
905	181	0	10.8581	-4.38242	-0.0924693	-0.0974829	2.31949	0.0924693	0.0974829	2.31949
906	181.2	0	10.8579	-4.37602	-0.0364298	0.0423723	0.584007	0.0452356	0.0423723	0.584007
907	181.4	0	10.8525	-4.37986	0.069453	-0.0598617	-0.427214	0.069453	0.0598617	0.427214
908	181.6	0	10.8492	-4.37798	-0.0217482	-0.00580684	0.782873	0.0260394	0.0371274	0.782873
909	181.8	0	10.898	-4.38515	0.0940622	0.267911	-2.77641	0.0940622	0.267911	2.77641
910	182	0	10.8971	-4.45119	0.248984	-0.00258816	-8.07782	0.297877	0.407256	8.07782
911	182.2	0	10.8683	-4.35887	-0.811146	-0.354226	22.5655	0.811146	0.354226	22.5655
912	182.4	0	10.8452	-4.28716	-0.339073	-0.0969159	6.04607	0.339073	0.0969159	6.04607
913	182.6	0	10.8446	-4.30819	0.143577	0.0242448	-2.94913	0.143577	0.0242448	2.94913
914	182.8	0	10.8546	-4.33497	0.0414081	0.011509	-0.663596	0.218345	0.0589919	3.08131
915	183	0	10.832	-4.31535	-0.101151	-0.159256	4.1302	0.101151	0.159256	4.1302
916	183.2	0	10.8383	-4.28204	-0.168343	0.0260348	1.77709	0.168343	0.0787845	1.77709
917	183.4	0	10.8428	-4.26814	-0.0457107	0.0431967	0.468287	0.0457107	0.0431967	1.10679
918	183.6	0	10.8514	-4.30001	0.212467	0.0743779	-2.86417	0.212467	0.137847	2.86417
919	183.8	0	10.8815	-4.36558	0.313392	0.114213	-9.31764	0.313392	0.135623	9.31764
920	184	0	10.8906	-4.49477	0.993324	-0.187447	-5.7328	0.993324	0.187447	5.7328
921	184.2	0	10.9059	-4.37203	-0.911391	-0.0285021	13.4781	0.911391	0.614891	21.3776
922	184.4	0	10.8296	-4.12266	-0.82942	-0.13832	14.7429	0.82942	0.13832	14.7429
923	184.6	0	10.8245	-4.14716	0.296547	0.0429751	-4.40249	0.296547	0.0462264	4.40249
924	184.8	0	10.8505	-4.21447	0.41285	0.159507	-7.35678	0.41285	0.159507	7.35678
925	185	0	10.8391	-4.21823	0.00899003	-0.104626	-1.55368	0.0272995	0.109706	1.55368
926	185.2	0	10.82	-4.16437	-0.339371	-0.0276993	6.57163	0.339371	0.0276993	6.57163
927	185.4	0	10.816	-4.13855	-0.0362411	-0.0269999	1.11445	0.0608259	0.0612111	1.11445
928	185.6	0	10.8178	-4.12205	-0.0963895	0.0644071	0.979698	0.0963895	0.0644071	0.979698
929	185.8	0	10.817	-4.11003	-0.0919123	0.00762521	2.11546	0.0919123	0.0318697	2.11546
930	186	1	10.7915	-4.11923	0.125961	-0.242346	0.253217	0.125961	0.242346	1.20313
931	186.2	1	10.7967	-4.1138	-0.0838698	0.108028	2.07958	0.0838698	0.244449	2.07958
932	186.4	1	10.7846	-4.09925	-0.106963	-0.0370988	0.778117	0.106963	0.0370988	0.778117
933	186.6	1	10.7879	-4.0847	-0.0213804	0.0180172	3.64068	0.192016	0.0180172	3.64068
934	186.8	1	10.824	-4.05782	-0.112939	0.138458	0.245522	0.309363	0.205976	0.272145
935	187	1	10.8354	-4.05996	0.0531055	0.0058945	-0.0852818	0.319519	0.250508	0.224089
936	187.2	1	10.8713	-4.07312	-0.0714802	0.440221	-2.30765	0.0714802	0.440221	2.30765
937	187.4	1	10.8867	-4.09125	0.0917413	0.0754561	-1.61667	0.0917413	0.0754561	1.61667
938	187.6	1	10.8912	-4.06304	-0.178636	0.0507892	2.05831	0.178636	0.102114	2.86404
939	187.8	1	10.9019	-4.08997	0.164977	-0.000706636	-2.5743	0.164977	0.038075	2.5743
940	188	1	10.9717	-4.07951	-0.0680374	0.293647	4.18162	0.0680374	0.387394	4.18162
941	188.2	1	10.9633	-4.0397	-0.311897	-0.0316624	3.52683	0.311897	0.0316624	3.52683
942	188.4	1	11.0015	-4.00056	-0.179043	0.181218	1.3649	0.179043	0.181218	1.67064
943	188.6	1	11.019	-4.01004	0.0419552	0.0571887	-0.892219	0.0471544	0.073901	0.892219
944	188.8	1	11.0259	-4.0161	0.0481843	0.113651	-0.710712	0.0481843	0.20027	0.710712
945	189	0	11.0497	-4.01095	-0.0901933	0.0514602	0.589041	0.0901933	0.0514602	0.589041
946	189.2	0	11.0546	-4.015	0.0307379	-0.00746987	0.979911	0.0307379	0.111045	0.979911
947	189.4	0	11.0722	-4.01277	-0.00627777	0.118005	-0.499476	0.0799915	0.118005	0.499476
948	189.6	0	11.0685	-4.03074	0.0866707	-0.0201959	-0.66701	0.0866707	0.0427641	0.66701
949	189.8	0	11.2469	-4.07109	0.273396	1.56652	2.79419	0.273396	1.56652	2.79419
950	190	0	11.2529	-4.14526	0.48168	0.0455265	-3.0889	0.48168	0.0455265	3.0889
951	190.2	0	11.1087	-4.84712	3.02498	-0.382552	2.62209	3.02498	1.29739	2.62209
952	190.4	0	11.2285	-4.72723	-0.820823	-0.14724	29.0528	0.820823	1.51797	29.0528
953	190.6	0	11.8779	-4.39398	-3.62933	5.9295	57.9808	3.62933	5.9295	57.9808
954	190.8	0	11.9791	-4.42463	0.253444	0.287098	-64.8066	0.701317	0.870206	64.8066
955	191	0	12.1905	-5.12968	3.02977	0.376313	-84.5685	3.02977	1.39733	84.5685
956	191.2	0	11.2352	-4.97611	-1.93775	-4.9004	71.3435	1.93775	4.9004	71.3435
957	191.4	0	10.715	-4.54742	-3.82898	-2.03895	78.3473	3.82898	2.03895	78.3473
958	191.6	0	11.1657	-2.38448	-10.9379	0.0240873	162.656	10.9379	6.55309	162.656
959	191.8	0	10.7395	-2.5653	4.85902	-3.52353	-176.37	4.85902	3.72101	176.37
960	192	0	11.2575	-3.92044	6.78519	3.89014	-145.276	6.78519	3.89014	145.276
961	192.2	0	12.1614	-4.10676	-0.718275	3.59655	52.2325	1.51381	3.68229	59.7122
962	192.4	0	12.7211	-3.54826	-1.81938	2.60989	92.954	1.81938	2.60989	92.954
963	192.6	0	13.2889	-2.9892	-4.28165	4.02255	157.777	4.28165	4.02255	157.777
964	192.8	0	14.787	-2.90076	-4.71632	6.09393	103.053	4.71632	6.09393	103.053
965	193	0	15.9153	-1.81967	-5.82766	-3.2274	-16.8759	5.82766	3.2274	26.644
966	193.2	0	15.822	-2.11458	4.32347	0.863503	-177.543	4.32347	0.863503	177.543
967	193.4	0	15.6399	-2.49624	2.98566	-0.469629	-25.3061	2.98566	1.11794	25.3061
968	193.6	0	15.4587	-2.70216	0	0	0	0	0	0
969	193.8	0	15.4587	-2.70216	0	0	0	0	0	0
970	194	0	15.4587	-2.70216	0	0	0	0	0	0
971	194.2	0	15.3615	-2.83879	0.977572	-0.482966	-81.5683	0.977572	0.482966	81.5683
972	194.4	0	15.1033	-3.03865	0.432937	-1.35885	-57.3563	0.740112	1.35885	57.3563
973	194.6	0	14.6983	-2.62314	-1.91741	-0.697432	-33.9451	2.43107	1.75049	33.9451
974	194.8	0	14.9233	-2.94564	3.06835	0.280512	-70.7516	3.06835	0.280512	70.7516
975	195	0	15.4147	-3.24139	3.03329	1.76767	-61.3087	3.03329	1.76767	61.3087
976	195.2	0	16.4135	-3.6133	4.15503	1.15799	-92.6842	4.15503	2.01705	92.6842
977	195.4	0	16.8846	-3.91999	2.18232	-0.833721	-47.6882	2.18232	2.03351	58.4207
978	195.6	0	16.6623	-3.98709	-2.73527	0.130755	43.0305	2.73527	0.130755	43.0305
979	195.8	0	16.2471	-2.97053	-4.62706	4.59657	19.8134	4.62706	4.59657	40.7743
980	196	0	16.9174	-2.74183	3.55205	0.447714	-41.9877	3.55205	0.721769	41.9877
981	196.2	0	16.8974	-2.58474	-1.64878	0.611922	100.426	1.64878	0.611922	100.426
982	196.4	0	16.5142	-1.56864	-4.15266	2.42689	24.219	4.15266	2.42689	33.0865
983	196.6	0	16.4908	-0.851395	-3.47551	3.31848	-40.6916	3.47551	3.31848	40.6916
984	196.8	0	16.8031	-0.840002	1.66627	0.91656	-29.6962	1.66627	0.91656	29.6962
985	197	0	17.3912	-0.947705	2.26771	1.47072	-23.7035	2.26771	1.47072	23.7035
986	197.2	0	17.6288	-0.179312	-1.64673	4.37718	-18.6288	1.64673	4.37718	18.6288
987	197.4	0	17.5987	0.343536	-1.23736	1.42297	-13.8175	1.23736	1.42297	13.8175
988	197.6	0	17.4513	0.996727	-2.35578	2.67947	-62.7096	2.35578	2.67947	62.7096
989	197.8	0	16.9206	0.846486	-2.80918	-2.46972	1.20856	2.80918	2.46972	11.4291
990	198	0	16.8335	0.534667	1.13638	-0.269084	-17.0821	1.20239	0.403096	17.0821
991	198.2	0	16.8717	0.318064	0.568408	-1.92944	0.188749	0.568408	1.92944	0.188749
992	198.4	0	16.8717	0.264158	0.321941	-0.0122334	-21.9554	0.824171	0.956597	21.9554
993	198.6	0	17.0501	0.0455092	1.01115	-1.25401	-23.0172	1.13537	1.25401	23.0172
994	198.8	0	17.2942	0.0622158	0.542688	0.0411115	-7.96833	0.542688	0.0411115	7.96833
995	199	0	17.2942	0.0622158	0	0	0	0	0	0
996	199.2	0	17.2942	0.0622158	0	0	0	0	0	0
997	199.4	0	17.2942	0.0622158	0	0	0	0	0	0
998	199.6	0	17.9767	-0.387393	2.35932	-3.02649	28.7195	4.52611	3.02649	28.7195
999	199.8	0	17.3213	-1.27939	-3.14221	-4.36331	-10.6313	3.14221	4.36331	17.9649
1000	200	0	17.0428	-1.46049	-0.759205	0.926492	-59.1465	0.759205	0.926492	59.1465
1001	200.2	0	17.9692	-0.434225	8.35277	3.92241	-174.717	8.35277	3.92241	174.717
1002	200.4	0	17.8609	0.700946	1.12935	2.52923	-71.7835	1.12935	2.52923	71.7835
1003	200.6	0	17.5226	0.673375	-0.895265	1.00525	-42.8092	0.895265	1.67043	42.8092
1004	200.8	0	17.5092	0.730818	0.795154	0.515369	-74.2614	0.795154	0.515369	74.2614
1005	201	0	16.9657	1.16898	4.91451	4.34542	-222.742	4.91451	5.40902	222.742
1006	201.2	0	15.7386	0.558811	-0.510797	6.42932	-86.4105	1.9721	6.42932	86.4105
1007	201.4	0	15.3186	-0.108904	0.664945	0.407343	-61.1566	0.854911	3.29165	61.1566
1008	201.6	0	15.2248	0.0956814	1.39296	-0.228606	-69.3614	1.39296	0.228606	69.3614
1009	201.8	0	14.947	0.036864	1.567	0.411734	-32.0895	1.567	0.411734	32.0895
1010	202	0	14.8216	0.0292857	-0.00134714	-0.177139	4.53238	0.796831	0.189404	12.9969
1011	202.2	0	14.8316	0.0500779	0.918937	0.200406	13.0296	2.16353	0.48988	13.0296
1012	202.4	0	14.5452	-0.0364891	0.947355	0.516658	10.4136	0.947355	0.516658	10.4136
1013	202.6	0	14.371	-0.0476299	1.34787	-0.135314	52.9149	1.34787	1.11666	52.9149
1014	202.8	0	14.7996	-0.16319	-3.19595	-0.0208915	70.036	3.19595	0.0510482	70.036
1015	203	0	15.1311	-0.486504	-1.60018	0.282435	30.149	1.60018	0.774089	47.8339
1016	203.2	0	15.0176	-0.480699	1.30722	0.77639	-29.1589	1.30722	0.77639	29.1589
1017	203.4	0	14.9587	-0.404167	0.136466	-0.336556	15.9905	1.22852	0.436858	28.5069
1018	203.6	0	14.8844	-0.211842	1.26463	-0.333208	-6.13974	1.26463	0.333208	7.83246
1019	203.8	0	14.2707	0.657267	7.48531	-3.6354	-41.0537	7.48531	4.03667	41.0537
1020	204	0	14.0802	1.11828	-2.76534	1.01375	103.051	2.76534	1.48851	103.051
1021	204.2	0	15.0131	0.360449	-7.51817	-4.89358	209.853	7.51817	4.89358	209.853
1022	204.4	0	14.8092	0.0502738	-2.45657	0.823543	124.347	2.45657	0.823543	124.347
1023	204.6	0	13.9476	0.250921	1.46725	5.08291	20.1098	1.46725	5.08291	20.1098
1024	204.8	0	11.084	1.34512	-0.991936	14.3511	58.135	1.24744	14.3511	58.135
1025	205	0	10.3002	1.68376	-1.04369	3.77931	-0.0421577	1.04369	3.77931	0.0421577
1026	205.2	0	9.46872	2.26024	0.176159	7.24362	2.80653	0.66399	7.24362	5.19246
1027	205.4	0	8.26774	2.71745	-1.08703	3.32094	11.2465	1.08703	3.32094	11.2465
1028	205.6	0	7.53939	2.88639	-1.26276	2.97454	36.7153	1.26276	2.97454	36.7153
1029	205.8	0	6.57728	3.17946	-4.07846	6.71478	66.9874	4.07846	6.71478	66.9874
1030	206	0	6.17204	3.33888	-1.22175	1.90627	27.3626	1.22175	1.90627	27.3626
1031	206.2	0	5.97969	3.36139	-0.456087	0.369244	10.1815	0.456087	0.369244	10.1815
1032	206.4	0	5.87291	3.5602	0.0938464	1.03066	9.68463	0.172588	1.03066	9.68463
1033	206.6	0	5.71796	3.792	-0.219366	2.24095	31.371	0.219366	2.24095	31.371
1034	206.8	0	5.47147	3.82991	-1.22358	0.676684	20.618	1.22358	0.676684	20.618
1035	207	0	5.28989	3.73607	-0.88138	-0.307812	29.313	0.88138	0.307812	29.313
1036	207.2	0	5.34697	3.82185	0.753352	0.552978	-10.5316	0.753352	0.552978	11.6476
1037	207.4	0	5.34421	3.89555	-0.0526351	0.315078	6.62756	0.0526351	0.315078	6.62756
1038	207.6	0	5.24046	3.8205	-0.720128	-0.308593	12.8859	0.720128	0.308593	12.8859
1039	207.8	0	5.09228	3.74224	-0.488751	-0.0899125	5.35569	0.609073	0.091098	14.9539
1040	208	0	5.17112	3.79288	0.508353	0.193906	-3.43321	0.508353	0.193906	3.43321
1041	208.2	0	5.15454	3.76734	-0.319213	-0.168922	4.08431	0.319213	0.168922	4.08431
1042	208.4	0	5.09172	3.7543	-0.423142	0.0511369	6.32867	0.423142	0.0511369	6.32867
1043	208.6	0	4.98464	3.74827	-0.720468	0.12323	11.9366	0.720468	0.151681	11.9366
1044	208.8	0	4.92691	3.83343	0.298991	0.50559	0.991632	0.687674	0.50559	3.09125
1045	209	0	5.30948	3.91293	2.20317	-0.566905	-36.565	2.20317	1.25423	36.565
1046	209.2	0	5.40706	3.97832	1.38382	0.526352	-25.364	1.38382	1.43692	25.364
1047	209.4	0	5.50465	4.04371	0.564479	1.61961	-14.163	0.564479	1.61961	14.163
1048	209.6	0	5.09298	4.71875	-1.84464	3.50844	2.39319	1.84464	3.50844	9.21947
1049	209.8	0	4.55174	4.90104	-1.38191	0.820326	-3.7759	1.38191	0.820326	4.50405
1050	210	0	4.28708	5.13308	-0.824174	2.44727	-75.3483	0.824174	2.44727	75.3483
1051	210.2	0	4.30628	5.48638	1.096	1.25592	-41.3721	1.096	1.27221	41.3721
1052	210.4	0	4.2473	5.65833	-0.69771	1.17822	29.2655	2.23731	1.17822	33.8067
1053	210.6	0	3.99637	5.9591	1.05071	2.32665	37.3855	1.57866	2.32665	37.3855
1054	210.8	0	3.78589	6.35788	-1.88365	1.7084	161.935	1.88365	1.7084	161.935
1055	211	0	3.39267	6.38042	-2.06432	0.221394	59.1236	2.06432	0.259997	59.1236
1056	211.2	0	3.6092	6.65953	1.24733	1.72266	13.3339	1.24733	1.72266	13.3339
1057	211.4	0	4.13468	7.41513	1.74528	4.89809	31.3575	1.74528	4.89809	31.3575
1058	211.6	0	4.40311	8.44431	-1.98842	6.16113	46.2475	1.98842	6.16113	46.2475
1059	211.8	0	4.54719	9.16734	-1.88039	4.75868	101.083	1.88039	4.75868	101.083
1060	212	0	4.44788	9.83999	-2.18392	-0.351152	69.9589	2.18392	0.565815	69.9589
1061	212.2	0	5.02316	11.1326	-5.55886	3.73955	165.272	5.55886	3.80638	165.272
1062	212.4	0	5.04441	11.3143	0	0	0	0	0	0
1063	212.6	0	7.09975	13.1997	-21.8419	11.4623	158.486	21.8419	11.4623	158.486
1064	212.8	0	7.6121	13.1279	-1.6904	3.42017	20.0344	1.6904	3.42017	20.0344
1065	213	0	8.70429	12.7491	-1.19068	5.13602	36.3603	1.19068	5.13602	36.3603
1066	213.2	0	9.01864	12.6905	-0.220524	-0.405781	8.35183	0.260081	0.405781	8.35183
1067	213.4	0	9.03367	12.7567	-0.531844	-0.201301	14.4014	0.531844	0.201301	14.4014
1068	213.6	0	9.02565	12.7854	-0.0733918	-0.0867899	0.273816	0.0733918	0.196908	1.89094
1069	213.8	0	9.00332	12.7591	0.233697	0.0106105	-1.11526	0.233697	0.0900908	2.43166
1070	214	0	9.00347	12.6966	0.0906249	0.106475	-4.88525	0.215269	0.358237	4.88525
1071	214.2	0	8.97001	12.7343	0.0272668	-0.317051	0.857308	0.0272668	0.317051	0.857308
1072	214.4	0	9.00127	12.7556	-0.219061	0.086829	3.60562	0.219061	0.126888	3.60562
1073	214.6	0	9.03001	12.8246	-0.338504	-0.267913	7.25726	0.338504	0.267913	7.25726
1074	214.8	0	9.02888	12.8508	0.0659512	-0.0306147	-1.17545	0.13878	0.0991758	1.17545
1075	215	0	9.01572	12.8356	0.0740485	0.0807491	-1.82821	0.0740485	0.0807491	1.82821
1076	215.2	0	9.04311	12.8307	-0.133606	0.19109	0.984308	0.133606	0.19109	1.22734
1077	215.4	0	9.0777	12.8634	-0.16927	-0.0553776	1.6606	0.16927	0.194381	1.6606
1078	215.6	0	9.09235	12.8583	0.0100115	0.0495189	0.0318369	0.0678469	0.0495189	0.491278
1079	215.8	0	9.11003	12.795	0.23165	0.465022	0.332518	0.23165	0.465022	0.332518
1080	216	0	9.32474	12.7861	-0.95761	0.963156	-1.2119	0.95761	0.963156	1.2119
1081	216.2	0	9.4587	12.7943	-0.135469	0.124392	-0.640809	0.199923	0.124392	1.96732
1082	216.4	0	9.46986	12.7074	0.267035	0.378543	-7.73257	0.267035	0.378543	7.73257
1083	216.6	0	9.48807	12.3388	1.78721	1.9551	-16.4667	1.78721	1.9551	16.4667
1084	216.8	0	9.56022	11.9311	0.88214	1.07603	5.19822	0.88214	1.07603	5.19822
1085	217	0	9.8281	12.089	-1.78267	0.410955	28.5498	1.78267	0.410955	28.5498
1086	217.2	0	10.1248	12.273	-1.28588	0.199963	19.3386	1.28588	0.199963	19.3386
1087	217.4	0	10.2886	12.4159	-0.967406	-0.00268128	15.7419	0.967406	0.268854	15.7419
1088	217.6	0	10.2956	12.2939	1.04351	0.793792	-2.64946	1.04351	0.793792	2.64946
1089	217.8	0	10.2516	12.1819	0.819836	0.413724	-1.64185	0.819836	0.413724	1.64185
1090	218	0	10.0996	11.9408	0.822375	0.364559	-20.1148	0.822375	0.364559	20.1148
1091	218.2	0	10.1956	12.0615	-1.34987	-0.36506	24.5307	1.34987	0.36506	24.5307
1092	218.4	0	10.3825	12.2557	-1.01433	-0.133379	32.3915	1.01433	0.133379	32.3915
1093	218.6	0	10.358	12.2496	0.152317	0.019662	-1.90446	0.152317	0.185596	1.90446
1094	218.8	0	10.4067	12.2769	-0.2995	-0.00571267	5.61409	0.2995	0.171094	5.61409
1095	219	0	10.4225	12.2784	-0.108969	-0.00848432	2.89481	0.108969	0.0277838	2.89481
1096	219.2	0	10.4989	12.3315	-0.707327	-0.103812	13.2022	0.707327	0.103812	13.2022
1097	219.4	0	10.5657	12.3753	-0.359639	-0.0343258	7.12387	0.359639	0.0616765	7.34092
1098	219.6	0	10.5238	12.334	0.450118	0.168595	-10.122	0.450118	0.217908	10.122
1099	219.8	0	10.4609	12.2827	0.142793	-0.0576636	-2.24487	0.19741	0.0732018	3.58454
1100	220	0	10.4834	12.2894	-0.175269	0.107881	2.78473	0.175269	0.107881	2.78473
1101	220.2	0	10.4931	12.3027	-0.0861105	-0.0299629	2.12242	0.0861105	0.0379309	2.12242
1102	220.4	0	10.4953	12.3266	-0.0283834	-0.140133	0.482673	0.0615283	0.140133	1.4726
1103	220.6	0	10.4851	12.2959	0.114122	0.149309	-2.41587	0.114122	0.149309	2.41587
1104	220.8	0	10.468	12.2967	0.095421	-0.0227185	-0.408728	0.103994	0.09128	0.797388
1105	221	0	10.4592	12.2773	0.049455	0.079805	0.429597	0.049455	0.079805	0.429597
1106	221.2	0	10.4618	12.2791	-0.00990568	-0.0276908	-0.273178	0.0252913	0.0771497	0.273178
1107	221.4	0	10.4526	12.2814	0.0479777	0.04012	-1.20015	0.0479777	0.129255	1.20015
1108	221.6	0	10.4734	12.2968	-0.0932391	-0.123517	0.462959	0.255459	0.137252	4.18492
1109	221.8	0	10.431	12.2475	0.457649	0.33068	-8.05742	0.457649	0.33068	8.05742
1110	222	0	10.3836	12.2328	0.287184	0.0268523	-3.75029	0.287184	0.266794	3.75029
1111	222.2	0	10.4566	12.2009	-0.643718	0.245144	9.38034	0.810508	0.245144	16.1729
1112	222.4	0	10.5492	12.2586	-0.271987	-0.0572209	1.77483	0.354664	0.0821369	2.05038
1113	222.6	0	10.6026	12.3229	-0.364476	-0.296894	5.59961	0.364476	0.296894	5.59961
1114	222.8	0	10.4127	12.1086	1.82741	0.662211	-35.6501	1.82741	0.662211	35.6501
1115	223	0	10.3386	12.0219	-0.254072	-0.114193	3.89007	0.254072	0.114193	3.89007
1116	223.2	0	10.3967	12.0868	-0.334006	-0.102691	7.05929	0.334006	0.102691	7.05929
1117	223.4	0	10.4119	12.0418	0.222678	0.469316	-6.59378	0.222678	0.469316	6.59378
1118	223.6	0	10.3303	11.9698	0.729233	0.164725	-11.0442	0.729233	0.256178	11.0442
1119	223.8	0	10.2537	11.9001	0.253296	0.0341099	-7.19412	0.253296	0.308616	7.19412
1120	224	0	10.2294	11.86	0.125067	-0.0777423	-1.18875	0.17967	0.187561	5.10173
1121	224.2	0	10.2763	11.8766	-0.390935	0.269183	5.28491	0.390935	0.269183	5.28491
1122	224.4	0	10.388	12.0401	-0.795942	-0.30038	16.0659	0.88168	0.315721	19.2155
1123	224.6	0	10.4689	12.0988	-0.578244	-0.0308766	11.5016	0.578244	0.0310736	11.5016
1124	224.8	0	10.4012	11.978	0.674809	0.328109	-17.962	0.674809	0.328109	17.962
1125	225	0	10.5097	12.0956	-0.97722	-0.333586	19.7649	0.97722	0.333586	19.7649
1126	225.2	0	10.4126	11.9649	1.8862	0.767652	-29.4814	1.8862	0.767652	29.4814
1127	225.4	0	10.4786	12.0551	-0.673023	-0.204938	8.97001	0.673023	0.204938	8.97001
1128	225.6	0	10.5759	12.1166	-0.175331	0.193084	4.53131	0.664703	0.483024	16.2108
1129	225.8	0	10.5566	12.0185	0.182792	0.153966	-4.15399	0.182792	0.171077	4.77772
1130	226	0	10.9048	12.3333	-4.02871	-1.03516	74.4171	4.02871	1.03516	74.4171
1131	226.2	0	10.8139	12.2785	0.939949	0.186682	-18.6337	0.945583	0.373496	19.6257
1132	226.4	0	10.6233	12.046	0.819278	0.419971	-22.2437	0.819278	0.419971	22.2437
1133	226.6	0	10.5631	12.0425	0.170572	-0.208274	-0.818833	0.170572	0.208274	1.04585
1134	226.8	0	10.5819	12.0739	-0.288797	-0.091883	3.73594	0.288797	0.091883	3.73594
1135	227	0	10.5833	12.0651	-0.00500345	0.0996204	7.7626	0.0709528	0.155602	7.7626
1136	227.2	0	10.6862	12.1413	-0.877656	-0.171456	15.1843	0.877656	0.171456	15.1843
1137	227.4	0	10.7581	12.2138	-0.227062	-0.0981347	3.35458	0.319592	0.0981347	3.35458
1138	227.6	0	10.8387	12.1867	-0.258957	0.530979	4.24417	0.258957	0.530979	4.24417
1139	227.8	0	10.7392	12.109	1.00418	0.131465	-18.8699	1.00418	0.131465	18.8699
1140	228	0	10.6334	12.0653	0.0652604	-0.162794	0.0525983	0.0652604	0.162794	2.51132
1141	228.2	0	10.7502	12.16	-1.0292	0.0802311	17.0627	1.0292	0.41132	17.0627
1142	228.4	0	10.8899	12.1903	-0.525066	0.0747721	9.81748	0.525066	0.0747721	9.81748
1143	228.6	0	10.8501	12.1477	0.669364	0.205664	-9.43801	1.04624	0.265023	14.592
1144	228.8	0	10.6955	12.0242	0.545028	0.073364	-16.1831	0.545028	0.073364	16.1831
1145	229	0	10.6073	11.6365	1.51126	1.40558	-31.0886	1.51126	1.40558	31.0886
1146	229.2	0	10.71	11.4025	-1.44869	0.814879	11.6211	4.20829	0.98749	83.6801
1147	229.4	0	11.3573	11.8648	-4.22022	0.0494955	69.3596	4.22022	0.0494955	69.3596
1148	229.6	0	11.689	11.9057	-1.56139	0.767353	-5.18979	1.56139	0.767353	10.4767
1149	229.8	0	11.8196	11.8325	0.0546019	0.40588	-28.666	0.788913	0.40588	28.666
1150	230	0	11.7195	11.5504	1.19246	0.827414	-23.8887	1.19246	0.827414	23.8887
1151	230.2	0	11.6773	11.2934	1.16012	1.04792	-11.7952	1.16012	1.04792	11.7952
1152	230.4	0	11.6243	10.9686	1.58348	1.34749	30.2626	1.58348	1.34749	30.2626
1153	230.6	0	11.9636	10.7309	-1.86856	1.27848	72.9498	1.86856	1.27848	72.9498
1154	230.8	0	12.6439	10.7687	-2.48834	0.277511	69.7442	2.48834	0.73468	69.7442
1155	231	0	12.6744	9.84575	-0.782654	8.37483	145.681	0.782654	8.37483	145.681
1156	231.2	0	12.6359	9.7545	0.329829	0.443683	16.2921	0.732455	0.443683	16.2921
1157	231.4	0	12.2682	9.51217	0.279356	2.38982	62.5952	2.23859	2.38982	62.5952
1158	231.6	0	12.1179	9.22021	0.430684	0.557986	17.2643	0.440533	0.679753	17.2643
1159	231.8	0	12.1316	9.187	-0.277275	0.213151	57.5752	0.277275	0.213151	57.5752
1160	232	0	12.2395	9.10951	-0.788585	-0.226998	26.9653	0.788585	0.293841	26.9653
1161	232.2	0	12.0828	9.03772	0.69808	1.27947	10.2108	0.69808	1.27947	10.2108
1162	232.4	0	11.5579	8.99025	1.29846	1.66937	12.7338	1.29846	1.66937	12.7338
1163	232.6	0	12.227	9.88582	3.22461	-9.47153	99.9021	3.22461	9.47153	99.9021
1164	232.8	0	12.375	9.54804	-2.81294	-0.339502	94.6775	2.81294	0.339502	94.6775
1165	233	0	11.1927	9.43179	-0.334956	12.3224	93.5462	1.46068	14.2214	93.5462
1166	233.2	0	9.47065	9.65869	-1.02028	1.10854	-5.4828	1.02028	1.10854	5.4828
1167	233.4	0	9.44732	9.67644	0.265147	0.143339	3.77759	0.265147	0.658885	4.18797
1168	233.6	0	9.59301	9.78222	1.21079	-1.33548	14.5523	1.21079	1.33548	14.5523
1169	233.8	0	9.61437	10.1193	1.74519	0.279294	2.23912	1.74519	0.706445	6.14423
1170	234	0	9.16957	9.94152	-3.59168	1.78425	134.743	3.59168	1.78425	134.743
1171	234.2	0	8.48171	9.30181	-3.35347	-1.33059	114.103	3.35347	1.33059	114.103
1172	234.4	0	7.68047	9.26594	-5.42768	1.73531	111.938	5.42768	1.73531	111.938
1173	234.6	0	7.52627	9.40998	-0.733511	0.619939	20.2234	0.733511	0.619939	30.3305
1174	234.8	0	7.64775	8.9168	1.32585	-3.2874	-37.2271	1.73045	3.2874	37.2271
1175	235	0	8.33163	8.77864	4.38884	0.53838	-106.932	4.38884	2.88693	106.932
1176	235.2	0	9.52907	8.98802	5.29676	-5.62328	-151.398	5.29676	5.62328	151.398
1177	235.4	0	9.83344	8.99924	1.19048	-0.908727	-79.2524	1.19048	1.49648	79.2524
1178	235.6	0	9.89671	9.55273	3.03514	0.475471	-77.2181	3.03514	0.475471	77.2181
1179	235.8	0	10.051	10.1575	1.08757	-0.908742	-28.2989	3.68821	0.908742	65.0247
1180	236	0	10.3894	8.67944	-11.317	-3.86348	126.694	11.317	3.86348	126.694
1181	236.2	0	10.3886	8.78196	0.479802	-0.305647	-74.6443	0.479802	1.24708	74.6443
1182	236.4	0	10.4681	9.31463	5.36921	0.437804	-231.39	5.36921	7.03718	231.39
1183	236.6	0	9.95271	10.0254	0.922579	-4.12767	-93.377	0.922579	4.12767	93.377
1184	236.8	0	9.80141	10.5919	2.04746	-2.07511	-30.802	2.04746	2.07511	30.802
1185	237	0	9.80141	10.5919	0	0	0	0	0	0
1186	237.2	0	9.10319	10.2778	4.83725	2.15194	-102.129	4.83725	2.15194	102.129
1187	237.4	0	9.20378	10.3329	-2.9041	-1.25017	73.1197	2.9041	1.25017	73.1197
1188	237.6	0	9.06498	11.4173	3.76914	-9.30232	-96.3887	7.64459	9.30232	96.3887
1189	237.8	0	8.97343	9.91272	8.66984	20.5878	-373.205	8.66984	20.5878	373.205
1190	238	0	8.97343	9.91272	0	0	0	0	0	0
1191	238.2	0	9.81657	10.0834	-4.58101	5.03448	-5.09273	4.58101	5.03448	5.09273
1192	238.4	0	10.4694	9.66304	2.91385	1.13105	-65.7267	2.91385	1.13105	65.7267
1193	238.6	0	10.4506	9.3986	1.17959	0.0963634	-55.0945	1.17959	0.0963634	55.0945
1194	238.8	0	10.5404	9.22705	0.95898	0.579637	-24.7059	0.95898	0.579637	24.7059
1195	239	0	10.5047	9.3047	-0.733257	-0.239483	-1.45717	0.733257	0.408146	1.45717
1196	239.2	0	10.7352	9.18634	0.908274	0.8978	-21.0457	0.908274	1.1739	21.0457
1197	239.4	0	10.4728	9.3108	-1.78437	-2.05119	-38.585	1.78437	2.05119	38.585
1198	239.6	0	10.9602	8.84969	3.5672	1.73722	-108.153	3.5672	1.73722	108.153
1199	239.8	0	11.0968	8.3517	2.23298	-1.09355	-122.883	2.23298	1.68446	122.883
1200	240	0	11.2954	8.22617	0	0	0	0	0	0
1201	240.2	0	10.1109	10.8331	-20.6888	14.4355	-2.10885	20.6888	14.4355	2.10885
1202	240.4	0	10.2753	10.7877	1.16885	0.240729	-27.8515	1.16885	0.240729	27.8515
1203	240.6	0	10.7214	10.5778	1.96747	-0.0786359	-48.3631	1.96747	0.584813	48.3631
1204	240.8	0	11.1877	10.5708	2.24458	-0.0987214	-38.8856	2.24458	1.11656	38.8856
1205	241	0	11.1263	10.4126	-1.36035	-0.811693	12.2485	1.36035	0.811693	12.2485
1206	241.2	0	11.3009	10.5493	1.49309	0.897625	6.06744	1.69677	0.897625	6.06744
1207	241.4	0	11.3587	11.4018	-1.47902	3.82422	-15.4428	1.47902	3.82422	15.4428
1208	241.6	0	11.5163	12.5301	1.24258	6.68074	-45.6484	1.24258	6.68074	45.6484
1209	241.8	0	10.6079	14.6689	-2.97439	8.95168	-107.06	2.97439	8.95168	107.06
1210	242	0	10.3833	14.898	0.69806	1.26952	-27.543	0.69806	1.26952	27.543
1211	242.2	0	9.98469	15.3235	-0.255186	3.1787	-21.5134	0.495206	3.1787	21.5134
1212	242.4	0	9.8111	15.3593	-0.345217	0.0299312	-16.1073	1.22591	0.19487	16.1073
1213	242.6	0	10.1779	15.212	0.231045	-2.7329	-17.8278	1.11763	2.7329	17.8278
1214	242.8	0	10.3354	14.9021	-0.563204	-0.68167	-0.194103	0.563204	0.68167	0.194103
1215	243	0	10.2373	14.7902	-1.58817	-0.593909	8.2449	2.18138	1.60678	8.2449
1216	243.2	0	10.0268	15.3035	3.16279	2.67426	-110.623	3.16279	2.67426	110.623
1217	243.4	0	9.24099	15.1765	-2.3482	4.05059	-74.9585	2.3482	4.05059	74.9585
1218	243.6	0	8.96181	15.479	2.80625	0.453501	-52.4556	2.80625	0.453501	52.4556
1219	243.8	0	8.76936	15.7351	1.35413	0.9169	-25.7982	1.35413	0.9169	25.7982
1220	244	0	8.84112	15.3361	-2.98684	-0.979944	67.7574	2.98684	1.14527	67.7574
1221	244.2	0	8.5589	14.44	-3.49264	0.90663	102.855	3.49264	0.90663	102.855
1222	244.4	0	8.23078	14.4896	-0.453008	2.5398	-51.6832	0.453008	2.5398	51.6832
1223	244.6	0	7.7811	15.8296	9.59377	4.67121	-165.908	9.59377	4.67121	165.908
1224	244.8	0	6.53825	17.1018	2.88523	3.18784	-16.0625	2.88523	3.18784	21.3942
1225	245	0	5.48073	15.9565	-5.06333	6.651	89.915	5.06333	6.651	89.915
1226	245.2	0	4.91399	16.1462	1.923	1.83061	-11.3648	1.923	1.83061	11.3648
1227	245.4	0	4.39265	16.0629	-0.205794	2.3596	-6.34074	1.01961	2.3596	7.69069
1228	245.6	0	4.15108	16.0112	-0.762152	1.45582	9.55714	0.762152	1.45582	9.55714
1229	245.8	0	3.5833	15.8207	-0.837421	2.80606	2.26995	0.837421	2.80606	3.01938
1230	246	0	2.87914	15.6905	-0.194283	2.59091	-34.6311	1.12251	2.59091	34.6311
1231	246.2	0	2.72852	15.8784	1.2906	0.498609	-20.1623	1.2906	0.498609	20.1623
1232	246.4	0	2.64855	16.043	1.06427	0.297332	-16.6012	1.06427	0.297332	16.6012
1233	246.6	0	2.36432	16.4336	1.92894	0.824956	6.80672	1.92894	0.909316	15.0136
1234	246.8	0	2.18973	16.227	-1.51056	0.803266	59.4575	1.51056	0.803266	59.4575
1235	247	0	2.16799	15.931	-1.8629	-0.19142	111.731	1.8629	0.19142	111.731
1236	247.2	0	2.42592	14.842	-4.82953	-3.75178	197.017	4.82953	3.75178	197.017
1237	247.4	0	2.05836	14.6903	-1.33615	0.43732	48.2597	1.33615	0.43732	48.2597
1238	247.6	0	1.39333	15.1597	-1.98658	4.00573	25.6954	1.98658	4.00573	25.6954
1239	247.8	0	1.16304	15.7753	-0.332504	3.08217	4.08668	0.332504	3.08217	4.08668
1240	248	0	1.07484	16.0057	-0.118805	1.21326	-13.1455	0.332031	1.21326	13.1455
1241	248.2	0	1.57848	17.2004	3.92628	5.00688	-25.3737	3.92628	5.00688	31.8728
1242	248.4	0	0.878645	18.1441	-2.2268	5.46566	39.0655	2.2268	5.46566	39.0655
1243	248.6	0	0.243101	19.1961	-3.49539	7.27826	54.8351	3.49539	7.27826	54.8351
1244	248.8	0	0.208926	19.3534	-0.24182	0.784319	25.8669	0.264817	0.784319	25.8669
1245	249	0	-0.216905	19.6174	-1.86772	1.52427	25.365	1.86772	1.52427	28.4584

## Sheet: fly3
	time	stimulus	x	y	Vx	Vy	Vz	Sx	Sy	Sz				Vx	Vy	Vz	Sx	Sy	Sz
0	0	0	0	0	0	0	0	0	0	0		Stim1	Before	-0.0141042	1.50875	-0.232039	2.2071	2.82034	51.0577
1	0.2	0	0	0	0	0	0	0	0	0			After	-0.739638	-1.16837	29.6081	1.53571	3.36184	62.0431
2	0.4	0	0.253112	0.185718	2.52719	1.7238	-54.8621	2.52719	1.7238	54.8621
3	0.6	0	0.506224	0.371436	5.05438	3.4476	-109.724	5.05438	3.4476	109.724		Stim2	Before	-0.0951773	1.45452	-20.2196	0.786587	1.82189	32.7414
4	0.8	0	0.834422	1.15851	-0.470927	2.5869	7.21947	0.470927	2.5869	16.8082			After	-0.00831568	-0.0053848	0.0268017	0.16462	0.205756	1.74114
5	1	0	0.752275	1.37581	-0.233272	0.176061	22.9784	0.377811	2.17069	48.9887
6	1.2	0	0.460324	1.10254	-1.703	-0.182064	-69.5846	1.703	1.61854	69.5846		Stim3	Before	0.046627	1.07836	9.51029	1.37369	2.59523	41.5965
7	1.4	0	-0.45984	2.97332	7.47715	12.7321	-321.729	7.47715	12.7321	321.729			After	0.0952942	0.841208	4.8351	1.05757	2.11318	50.0165
8	1.6	0	-1.03731	3.76911	0	0	0	0	0	0
9	1.8	0	-1.87502	2.83046	-3.87583	9.41556	-188.765	3.87583	9.41556	188.765		Average	Before	-0.0208848	1.34721	-3.64711	1.45579	2.41249	41.7985
10	2	0	-2.9476	2.99007	3.87176	-0.786308	-92.5443	3.87176	3.60147	92.5443			After	-0.217553	-0.110849	11.49	0.919298	1.89359	37.9336
11	2.2	0	-3.18637	2.34392	-1.97807	4.09579	3.09716	1.97807	4.09579	50.7915
12	2.4	0	-3.17931	1.94673	-1.31692	-0.474712	-13.6122	1.31692	1.23559	13.6122
13	2.6	0	-3.00579	2.05625	0.0579326	-0.162275	-73.9336	0.316962	1.38894	73.9336
14	2.8	0	-3.03196	1.22658	-1.07852	3.58951	-149.656	2.4902	5.13837	149.656
15	3	0	-1.9958	0.469117	-2.12781	7.33895	-94.0119	3.31077	7.33895	94.0119
16	3.2	0	-1.51796	-0.182992	-0.588185	0.860035	62.3467	0.588185	5.17696	98.7572
17	3.4	0	-1.93209	0.551822	0.932581	-3.54311	73.2529	0.932581	3.54311	73.2529
18	3.6	0	-2.1625	0.710402	1.76294	-0.318535	125.942	1.76294	0.318535	125.942
19	3.8	0	-2.21757	0.777135	0.2548	-0.440107	58.1462	0.587501	0.440107	58.1462
20	4	0	-1.81366	0.717444	-1.82941	0.117269	5.45893	1.94126	1.58449	54.3534
21	4.2	0	-2.03248	0.803671	1.4545	-1.16022	-43.703	1.4545	1.36289	43.703
22	4.4	0	-1.90998	1.46558	-0.0361785	-2.38928	115.882	0.341116	3.49	115.882
23	4.6	0	-3.17323	0.770643	2.96025	6.36861	27.5256	3.25934	6.36861	27.5256
24	4.8	0	-3.76333	0.0801168	-0.623372	4.697	-7.78951	1.26182	4.697	64.1771
25	5	0	-3.99269	-0.280368	0.464567	1.82848	-47.0452	0.464567	1.82848	47.0452
26	5.2	0	-3.97369	-0.292932	-0.436941	-0.598726	32.0477	0.436941	0.598726	32.0477
27	5.4	0	-3.66443	-0.327274	-1.31612	-0.17508	87.183	1.31612	2.55444	87.183
28	5.6	0	-4.96817	-0.755387	1.48938	5.98377	55.0678	2.86051	5.98377	55.0678
29	5.8	0	-5.29176	-0.789997	1.4419	1.363	43.0757	1.4419	1.60516	43.0757
30	6	0	-5.03705	-0.462884	1.3061	-1.7011	89.0216	1.3061	1.7011	89.0216
31	6.2	0	-4.72582	-0.396599	-0.174444	-1.8335	67.3301	0.174444	1.8335	67.3301
32	6.4	0	-4.65963	-0.379104	0.0578973	0.204287	38.8646	0.721745	0.206729	38.8646
33	6.6	0	-4.96189	-0.0859914	0.862709	2.23912	0.165548	0.862709	2.23912	9.40377
34	6.8	0	-5.03056	-0.108681	-0.490086	-0.129151	23.3236	0.490086	0.129151	23.3236
35	7	0	-4.9642	-0.172915	-0.0185301	-1.11583	30.3216	0.277701	1.63487	30.3216
36	7.2	0	-4.501	-0.380113	0.430442	-1.78007	39.3586	0.430442	1.78007	39.3586
37	7.4	0	-4.8315	-0.875915	-3.286	-0.801966	87.8102	3.286	0.952804	87.8102
38	7.6	0	-5.48789	1.44455	3.52093	12.1139	26.6232	3.52093	12.1139	54.8831
39	7.8	0	-5.38454	1.49336	-0.60505	-0.555675	-9.006	0.60505	0.555675	9.006
40	8	0	-5.38203	1.48761	0.207984	-0.199205	-5.92848	0.323125	0.615024	5.92848
41	8.2	0	-5.12101	1.151	1.0378	-3.50778	65.542	1.34715	3.50778	65.542
42	8.4	0	-4.81808	0.900122	0.849054	0.690716	13.7119	1.29808	1.48612	51.0453
43	8.6	0	-4.71909	-0.476813	-0.710121	-11.4025	176.785	2.44898	11.4025	176.785
44	8.8	0	-5.33241	-0.886546	-2.70624	0.840891	49.1635	2.70624	0.840891	49.1635
45	9	0	-5.15648	-0.872742	1.57091	0.341645	-31.8825	1.57091	0.589202	31.8825
46	9.2	0	-5.63486	-2.07188	1.71729	-10.4254	93.0634	1.71729	10.4254	93.0634
47	9.4	0	-7.20251	-2.92177	-4.06794	-10.3796	265.568	4.06794	10.3796	265.568
48	9.6	0	-7.20251	-2.92177	0	0	0	0	0	0
49	9.8	0	-7.20251	-2.92177	0	0	0	0	0	0
50	10	0	-7.19886	-2.9233	0.0232818	0.0303937	-0.170814	0.0232818	0.0303937	0.170814
51	10.2	0	-7.19521	-2.92482	0.0465636	0.0607873	-0.341627	0.0465636	0.0607873	0.341627
52	10.4	0	-7.19156	-2.92635	0.0698454	0.091181	-0.512441	0.0698454	0.091181	0.512441
53	10.6	0	-7.18792	-2.92787	0.0931272	0.121575	-0.683254	0.0931272	0.121575	0.683254
54	10.8	0	-7.18427	-2.92939	0.116409	0.151968	-0.854068	0.116409	0.151968	0.854068
55	11	0	-7.18062	-2.93092	0.139691	0.182362	-1.02488	0.139691	0.182362	1.02488
56	11.2	0	-7.17697	-2.93244	0.162973	0.212756	-1.19569	0.162973	0.212756	1.19569
57	11.4	0	-7.10852	-2.89425	-0.226081	0.318155	-2.03309	0.226081	0.318155	3.33432
58	11.6	0	-7.11662	-2.92404	0.126998	-0.122973	-2.50004	0.342419	0.157462	2.50004
59	11.8	0	-7.09714	-2.93928	0.128148	0.0807101	-5.34154	0.219659	0.0807101	5.34154
60	12	0	-7.07031	-2.93399	0.0929586	0.147044	-4.02957	0.131197	0.147044	4.02957
61	12.2	0	-6.9922	-3.0062	1.06851	-0.158345	-27.7702	1.69822	1.20489	27.7702
62	12.4	0	-7.45339	-3.24993	-1.04794	-3.63249	25.6952	1.59685	3.63249	25.6952
63	12.6	0	-9.38011	-3.57434	-0.0475209	-9.05483	40.0911	1.67066	9.05483	40.0911
64	12.8	0	-10.4861	-3.68865	-0.719753	-5.16437	59.9315	0.719753	5.16437	59.9315
65	13	0	-10.956	-3.6188	0.144929	-2.83139	44.8484	0.144929	2.83139	44.8484
66	13.2	0	-11.1193	-3.75066	1.29283	-0.727933	38.6589	1.29283	0.727933	38.6589
67	13.4	0	-11.6287	-3.22604	-1.72329	-4.24056	82.4282	2.31508	4.24056	82.4282
68	13.6	0	-12.4189	-2.59816	-0.0174188	-4.99742	58.1793	1.72796	4.99742	58.1793
69	13.8	0	-13.0787	-2.30235	1.22678	-3.16668	75.9966	1.22678	3.16668	75.9966
70	14	0	-13.684	-1.21763	1.12948	-5.39409	252.22	1.87126	5.39409	252.22
71	14.2	0	-13.004	-0.597484	-0.973295	-3.98943	157.252	0.973295	4.14966	157.252
72	14.4	0	-12.9988	-0.62119	-0.304493	-0.134976	19.8284	0.917895	0.399875	19.8284
73	14.6	0	-12.9454	-0.614627	0.164918	0.0173419	12.7498	0.274094	0.434185	12.7498
74	14.8	0	-12.882	-0.792257	-0.995585	0.076933	15.4684	0.995585	0.180989	15.4684
75	15	0	-12.8486	-0.795914	0.194346	-0.320447	6.79427	0.430662	0.320447	6.79427
76	15.2	0	-12.8102	-0.727967	0.115792	-0.242609	2.51285	0.115792	0.242609	2.51285
77	15.4	0	-12.8518	-0.772539	-0.118189	0.395329	-1.45	0.304052	0.395329	1.45
78	15.6	0	-12.8182	-0.768411	-0.194549	-0.149673	0.772648	0.204081	0.442194	0.961101
79	15.8	0	-12.8416	-0.775014	0.146586	0.0610678	0.521884	0.146586	0.0610678	0.521884
80	16	0	-12.8537	-0.74536	0.189887	-0.0781965	0.734223	0.189887	0.147252	0.734223
81	16.2	0	-12.8294	-0.825543	-0.934908	0.212025	-3.50179	0.934908	0.212025	3.50179
82	16.4	0	-12.778	-0.760849	0.169877	-0.376112	2.53486	0.236875	0.376112	2.9961
83	16.6	0	-12.7571	-0.764075	-0.0599421	-0.0599562	-0.0721675	0.0599421	0.0777715	0.124182
84	16.8	0	-12.7592	-0.767377	0.00744866	0.0218606	0.0162734	0.0234653	0.0218606	0.252949
85	17	0	-12.8485	-0.844973	-0.172569	0.449377	5.58048	0.172569	0.789614	5.58048
86	17.2	0	-12.7962	-0.815962	-0.0384392	-0.343461	2.69373	0.25934	0.343461	2.69373
87	17.4	0	-12.786	-0.815334	0.0584468	0.106245	0.273941	0.0584468	0.106245	3.16936
88	17.6	0	-12.7988	-0.842196	-0.124579	0.0916598	3.50015	0.124579	0.0972812	3.50015
89	17.8	0	-12.8067	-0.819155	0.278325	-0.036304	3.45693	0.278325	0.103184	3.45693
90	18	0	-12.8264	-0.788884	-0.11211	0.206496	-0.110394	0.482212	0.325367	1.89178
91	18.2	0	-12.8125	-0.807596	-0.0276405	-0.150782	4.72059	0.24222	0.210226	4.72059
92	18.4	0	-12.7857	-0.772899	0.0695597	-0.125862	0.332667	0.524304	0.391412	0.942146
93	18.6	0	-12.787	-0.829364	-0.0721671	0.00130997	-0.288884	0.352992	0.114926	0.989118
94	18.8	0	-12.7698	-0.817714	-0.0491791	-0.0481223	1.56853	0.0491791	0.131344	1.56853
95	19	0	-12.7792	-0.816904	0.0533221	0.0248153	-0.031863	0.0667791	0.0248153	0.370813
96	19.2	0	-12.8654	-0.823789	0.149689	0.400654	5.26411	0.156961	0.40826	5.26411
97	19.4	0	-12.8303	-0.789192	0.0620578	-0.423186	3.60167	0.0620578	0.423186	3.60167
98	19.6	0	-12.7888	-0.772506	0.057475	-0.315152	14.9199	0.0775528	0.315152	14.9199
99	19.8	0	-12.7703	-0.832853	-0.344908	0.0738938	4.48329	0.344908	0.121143	4.48329
100	20	0	-12.6981	-0.730459	0.345913	-0.475528	8.14575	0.608976	0.475528	8.14575
101	20.2	0	-12.7112	-0.719922	0.120077	0.0986131	1.98074	0.153254	0.0986131	1.98074
102	20.4	0	-12.7241	-0.729144	-0.100161	0.0902652	3.86756	0.207457	0.0902652	3.8784
103	20.6	0	-12.7364	-0.751241	-0.076694	0.105645	3.47178	0.159913	0.130257	3.47178
104	20.8	0	-12.7761	-0.774684	0.0464677	0.129629	2.00375	0.217426	0.213007	2.00375
105	21	0	-12.7696	-0.749478	0.0207128	-0.0427665	2.02363	0.134779	0.0427665	2.02363
106	21.2	0	-12.7559	-0.772748	-0.143126	-0.0477541	2.98399	0.143126	0.0477541	2.98399
107	21.4	0	-12.7717	-0.807823	-0.054022	0.106987	6.90756	0.268245	0.130016	6.90756
108	21.6	0	-12.7864	-0.78371	0.105006	0.0795026	4.08363	0.105006	0.0795026	4.08363
109	21.8	0	-12.7457	-0.810962	-0.227347	-0.258916	2.69795	0.227347	0.258916	2.69795
110	22	0	-12.789	-0.814025	0.0665295	0.266671	2.17682	0.0665295	0.279328	2.17682
111	22.2	0	-12.752	-0.839557	-0.232216	-0.139951	4.68959	0.232216	0.238791	5.3088
112	22.4	0	-12.6843	-0.926833	-0.596597	-0.583055	14.3663	0.596597	0.583055	14.3663
113	22.6	0	-12.5847	-0.98161	-0.0851536	-0.443507	12.9235	0.0851536	0.443507	12.9235
114	22.8	0	-12.651	-1.07121	-0.67882	0.0269488	19.5914	0.67882	1.13814	19.5914
115	23	0	-12.133	-1.54257	-2.09353	-3.05743	62.8338	2.09353	3.05743	62.8338
116	23.2	0	-12.2111	-1.67687	-0.687335	0.672575	42.5478	0.831869	0.672575	42.5478
117	23.4	0	-12.2759	-1.8605	-0.41354	-0.89502	38.975	0.750988	2.08363	38.975
118	23.6	0	-12.1457	-2.15332	-1.56648	-0.729477	20.8555	1.56648	0.729477	20.8555
119	23.8	0	-12.1795	-2.29356	-0.0288887	-0.0913027	-7.15923	0.133174	0.376687	7.15923
120	24	0	-12.2531	-2.34518	-0.530746	-0.0942917	4.30491	0.530746	0.534377	4.30491
121	24.2	0	-12.5733	-2.39238	-1.00793	1.29899	18.9301	1.00793	1.29899	18.9301
122	24.4	0	-12.7284	-2.4489	-0.910108	0.269293	5.63419	0.910108	0.375216	5.63419
123	24.6	0	-13.0905	-2.34488	-0.470505	1.34756	-20.7537	0.773119	2.68245	29.7947
124	24.8	0	-12.9473	-2.49089	-0.321782	-0.95171	16.5337	0.321782	0.95171	16.5337
125	25	0	-12.1037	-2.8596	2.40733	-5.51842	99.2549	2.40733	5.51842	99.2549
126	25.2	0	-11.7092	-4.27122	-1.25992	-7.36867	147.511	1.25992	7.36867	147.511
127	25.4	0	-11.8826	-5.89102	1.61681	-6.81534	166.796	1.61681	6.81534	166.796
128	25.6	0	-11.9897	-6.29319	0.218848	-1.62372	22.0317	0.218848	1.62372	22.0317
129	25.8	0	-12.8695	-6.89268	-1.21729	-9.52051	179.813	1.21729	9.52051	179.813
130	26	0	-13.1477	-7.31492	1.29434	-2.70725	26.3255	1.29434	2.70725	26.3255
131	26.2	0	-14.5143	-7.8661	0.828302	-7.92872	133.191	0.966794	7.92872	133.191
132	26.4	0	-14.6622	-7.3012	-2.66551	0.24468	61.0612	3.35566	0.554441	95.3531
133	26.6	0	-14.683	-7.66133	2.20568	-0.520859	-65.5316	2.20568	1.42028	65.5316
134	26.8	0	-15.0341	-8.1007	1.63208	-1.27182	-0.162063	1.63208	1.27182	8.95907
135	27	0	-15.3011	-8.14863	0.227389	-1.63243	21.2935	0.227389	1.63243	21.2935
136	27.2	0	-15.7926	-8.08961	0.456502	-3.20389	72.9218	0.742383	3.20389	72.9218
137	27.4	0	-16.825	-7.57251	-0.207966	-6.28285	88.2628	0.580496	6.28285	88.2628
138	27.6	0	-17.867	-6.4777	0.294926	-6.29576	133.641	0.823775	6.29576	133.641
139	27.8	0	-18.008	-5.91835	-0.446972	-2.38181	44.7279	0.975794	2.38181	44.7279
140	28	0	-18.0215	-5.56827	-0.553068	-1.6041	29.8151	0.553068	1.6041	29.8151
141	28.2	0	-17.9245	-5.05913	-0.610944	-2.65963	50.8879	0.610944	2.65963	50.8879
142	28.4	0	-17.5787	-4.42738	-1.213	-3.3297	80.2366	1.213	3.3297	80.2366
143	28.6	0	-17.3408	-3.85625	0.114961	-3.4186	46.5932	0.37698	3.4186	46.5932
144	28.8	0	-15.8433	-3.11269	-4.40732	-8.48142	196.277	4.40732	8.48142	196.277
145	29	0	-15.4763	-3.23771	-0.341268	0.567542	10.3497	0.341268	0.567542	10.3497
146	29.2	0	-15.3535	-3.13813	0.363465	-0.880849	-1.41626	0.363465	0.880849	1.41626
147	29.4	0	-15.0302	-2.85714	0.852152	-2.123	46.4868	0.852152	2.123	46.4868
148	29.6	0	-14.9543	-2.82455	0	0	0	0	0	0
149	29.8	0	-14.7598	-2.95529	-1.44699	-1.75069	36.3251	1.44699	1.75069	36.3251
150	30	0	-14.7628	-3.01431	0.443301	1.48946	13.4389	0.443301	1.48946	18.1902
151	30.2	0	-14.8	-3.05068	-0.321373	-0.593178	0.883901	0.321373	0.593178	7.98694
152	30.4	0	-14.6412	-3.13905	-0.335679	-0.587469	2.68576	0.500307	0.587469	6.50211
153	30.6	0	-14.7283	-3.13566	-0.0594343	0.538674	1.44256	0.0594343	0.538674	1.44256
154	30.8	0	-14.8371	-3.108	0.0924077	0.258583	-7.22274	0.283454	1.07529	7.22274
155	31	0	-14.8044	-3.12337	-0.0506348	-0.127653	0.293678	0.0523399	0.561885	2.4189
156	31.2	0	-14.5638	-3.17784	-0.379497	-1.56622	-1.31302	0.379497	1.56622	24.573
157	31.4	0	-14.5071	-3.20409	-0.0249764	0.603927	0.545689	0.0249764	0.603927	16.3493
158	31.6	0	-14.6148	-3.19035	-0.018599	0.0653111	4.2205	0.33308	0.69057	5.30422
159	31.8	0	-14.4927	-3.20508	0.265801	0.278497	3.58887	0.641143	2.56729	37.9811
160	32	0	-14.5903	-3.2134	-0.462184	-0.465909	13.8687	0.462184	0.465909	21.1849
161	32.2	0	-14.7218	-3.18387	0.506172	1.76001	-11.8929	0.506172	1.76001	11.8929
162	32.4	0	-14.6495	-3.21495	-0.104035	-0.432879	4.08783	0.20292	0.432879	6.49512
163	32.6	0	-14.6555	-3.23151	-0.0243496	0.169785	2.76084	0.360399	0.169785	2.76084
164	32.8	0	-14.6458	-3.21661	0.0394496	0.0387906	-1.2784	0.149317	0.570231	1.2784
165	33	0	-14.6539	-3.24933	-0.131747	-0.206366	0.941776	0.438485	0.206366	1.02196
166	33.2	0	-14.6225	-3.25534	-0.171411	0.0459371	-1.73756	0.171411	0.431622	1.73756
167	33.4	0	-14.6899	-3.24293	0.0461419	0.14382	-0.0736419	0.313001	0.410355	1.06928
168	33.6	0	-14.6073	-3.25215	0.0783563	-0.441662	0.786167	0.0783563	0.441662	0.786167
169	33.8	0	-14.7218	-3.26576	-0.0803512	0.718734	-0.697967	0.302404	0.718734	1.91269
170	34	0	-14.6406	-3.2722	-0.0976225	-0.503949	3.04794	0.0976225	0.503949	3.55052
171	34.2	0	-14.6748	-3.28017	0.0572975	0.523023	-5.69603	0.209394	0.75111	11.5671
172	34.4	0	-14.6116	-3.29096	-0.199546	-0.74208	7.15165	0.215776	0.74208	7.15165
173	34.6	0	-14.6303	-3.29573	0.0988333	0.257163	-2.17996	0.0988333	0.257163	5.23191
174	34.8	0	-14.6558	-3.27451	-0.00879411	-0.26693	-2.5624	0.27605	1.1094	2.5624
175	35	0	-14.5231	-3.31678	-0.0676252	-0.333056	17.0284	0.0962073	0.333056	17.0284
176	35.2	0	-14.4866	-3.29872	0.140228	-0.141724	-5.13074	0.140228	0.152396	5.13074
177	35.4	0	-14.4684	-3.27388	0.186431	-0.151657	-8.55306	0.186431	0.151657	8.55306
178	35.6	0	-14.5567	-3.28451	-0.187116	0.302184	0.579428	0.187116	0.770395	1.42228
179	35.8	0	-14.5426	-3.3113	-0.0118174	-0.00219078	5.50112	0.0895789	0.148007	5.50112
180	36	0	-14.505	-3.3451	-0.142356	-0.0558212	-0.119413	0.207067	0.489576	1.30327
181	36.2	0	-14.4767	-3.35254	-0.0705592	-0.374729	6.65292	0.0793611	0.374729	6.65292
182	36.4	0	-14.4377	-3.34925	0.0828351	0.0628207	0.0996374	0.0828351	0.421605	0.292171
183	36.6	0	-14.4802	-3.37236	-0.188761	0.0924054	-0.203277	0.188761	0.0924054	0.203277
184	36.8	0	-14.4666	-3.34861	0.120803	0.0246585	1.70519	0.309437	0.372094	1.9176
185	37	0	-14.4903	-3.35799	0.00067958	0.00558707	0.329044	0.0650584	0.0122619	0.329044
186	37.2	0	-14.4851	-3.35561	0.0180255	-0.0265017	2.01026	0.0581779	0.0265017	2.31218
187	37.4	0	-14.4892	-3.35096	-0.00814081	0.031315	2.09281	0.0236062	0.031315	2.38122
188	37.6	0	-14.4642	-3.37169	-0.196273	-0.238562	3.581	0.311017	0.238562	3.581
189	37.8	0	-14.4487	-3.38692	0.162202	-0.107648	-1.06929	0.217085	0.368697	5.501
190	38	0	-14.4199	-3.43026	-0.298431	-0.0578737	3.30965	0.298431	0.0578737	3.30965
191	38.2	0	-14.4043	-3.41347	0.146229	-0.0420483	1.78485	0.146229	0.0963542	1.93871
192	38.4	0	-14.4503	-3.42265	-0.232535	0.392074	-1.33686	0.232535	0.392074	1.33686
193	38.6	0	-14.4029	-3.44216	-0.0730208	-0.288439	-0.0317653	0.0730208	0.288439	0.36865
194	38.8	0	-14.3922	-3.42828	0.0976003	0.0793076	0.951934	0.113195	0.21018	0.951934
195	39	0	-14.3792	-3.44374	-0.0462744	-0.286334	2.73814	0.084038	0.286334	2.73814
196	39.2	0	-14.3788	-3.46848	-0.22077	0.281345	-0.231138	0.22077	0.403229	1.77519
197	39.4	0	-14.3882	-3.44632	0.180106	-0.194063	-0.341209	0.218049	0.194063	2.51393
198	39.6	0	-14.3404	-3.47781	-0.107344	-0.363186	3.26148	0.107344	0.416676	3.26148
199	39.8	0	-14.3645	-3.43606	0.162121	0.168177	-2.00203	0.262067	0.908549	2.00203
200	40	0	-14.3206	-3.4793	-0.0411238	0.0671893	1.66258	0.414012	0.468541	2.48907
201	40.2	0	-14.3035	-3.46145	-0.00164742	-0.17987	0.894453	0.0429802	0.245296	1.63294
202	40.4	0	-14.3029	-3.469	0.0102969	-0.00523957	0.732662	0.125898	0.0943554	1.24779
203	40.6	0	-14.3123	-3.47302	-0.150012	-0.0358959	0.640923	0.197493	0.178863	0.969016
204	40.8	0	-14.3241	-3.46613	0.0915815	0.132752	-0.801946	0.150901	0.132752	0.801946
205	41	0	-14.3512	-3.46027	-0.0225604	0.212123	0.252541	0.121067	0.212123	0.992051
206	41.2	0	-14.4037	-3.48739	-0.190741	0.0325668	5.15357	0.190741	0.398638	5.15357
207	41.4	0	-14.477	-3.4823	0.0292433	0.276396	-11.3538	0.154112	0.938258	11.3538
208	41.6	0	-14.4205	-3.46962	0.141817	-0.179509	6.39273	0.141817	0.179509	6.39273
209	41.8	0	-14.473	-3.51101	-0.333245	-0.111934	3.69421	0.333245	1.15518	3.69421
210	42	0	-14.4361	-3.51817	0.116591	0.194477	0.615756	0.116591	0.194477	0.638663
211	42.2	0	-14.6836	-3.54526	-0.207516	1.11144	-11.9765	1.01372	1.11144	11.9765
212	42.4	0	-14.6979	-3.53987	-0.340966	0.175682	4.48428	0.340966	0.363473	4.48428
213	42.6	0	-14.7196	-3.55346	0.0220325	-0.0909403	1.80275	0.199852	0.0972181	5.61853
214	42.8	0	-14.8396	-3.54694	0.0124287	0.79841	-2.13308	0.20101	0.79841	5.15969
215	43	0	-14.9219	-3.5461	-0.209255	0.408823	1.20259	0.209255	0.408823	3.69637
216	43.2	0	-15.1358	-3.38495	0.927569	1.7481	-1.74037	0.927569	1.7481	4.09595
217	43.4	0	-15.3201	-3.47207	-0.890953	0.173873	9.11583	0.890953	0.499545	9.11583
218	43.6	0	-15.3963	-3.50137	-0.372186	0.208259	1.07879	0.372186	0.208259	5.75273
219	43.8	0	-15.4907	-3.57722	-0.346845	0.561536	-5.89394	0.346845	0.561536	5.89394
220	44	0	-15.4932	-3.70996	-0.679916	-0.256133	-7.2405	0.679916	0.73383	7.2405
221	44.2	0	-15.4524	-3.82286	-0.163921	-0.809124	-6.63348	1.17967	0.809124	6.63348
222	44.4	0	-15.2217	-3.71175	0.728508	-0.981823	15.4199	0.728508	0.981823	15.4199
223	44.6	0	-14.711	-3.76978	0.295758	-3.15152	25.1867	0.490442	3.15152	25.1867
224	44.8	0	-14.1769	-3.81045	0.917015	-2.91091	56.1982	0.917015	2.91091	56.1982
225	45	0	-13.2012	-4.39818	0.709077	-5.29203	157.125	0.709077	6.19237	157.125
226	45.2	0	-12.9754	-4.58491	0.55358	-2.37464	19.0199	0.55358	2.37464	19.0199
227	45.4	0	-12.6506	-5.03411	0.285411	-2.4758	23.1569	0.285411	2.4758	23.1569
228	45.6	0	-12.3728	-6.12922	0.19076	-7.00578	160.694	0.790122	7.00578	160.694
229	45.8	0	-12.3951	-7.02931	-0.421819	-2.25681	77.8636	1.31853	2.7441	77.8636
230	46	0	-13.3708	-7.87091	-1.16466	-6.65727	125.922	1.16466	6.65727	125.922
231	46.2	0	-13.7561	-8.04606	-0.314958	-1.99745	29.1735	0.314958	1.99745	29.1735
232	46.4	0	-14.0705	-8.34953	0.71598	-2.09996	22.2886	0.71598	2.09996	22.2886
233	46.6	0	-15.3203	-8.95591	0.541624	-7.23227	135.003	0.836286	7.23227	135.003
234	46.8	0	-15.938	-8.82039	-0.69717	-2.64275	79.3015	0.69717	2.64275	79.3015
235	47	0	-16.6821	-7.82337	-2.89403	-6.22789	150.165	2.89403	6.22789	150.165
236	47.2	0	-17.0606	-6.98185	-1.01696	-4.14491	79.4843	1.01696	4.14491	79.4843
237	47.4	0	-17.1585	-6.74898	0.113375	-0.0175709	-2.95376	0.23312	0.153963	2.95376
238	47.6	0	-17.0525	-6.41469	-1.96091	-1.78045	15.6066	1.96091	1.78045	15.6066
239	47.8	0	-16.7879	-6.05503	-1.22467	-0.445213	-22.7009	1.22467	0.688845	28.4414
240	48	0	-16.7802	-6.0652	0	0	0	0	0	0
241	48.2	0	-16.7802	-6.0652	0	0	0	0	0	0
242	48.4	0	-16.9039	-5.99725	0.249786	-1.75628	80.9073	1.26739	2.69922	102.278
243	48.6	0	-16.9428	-5.76555	0	0	0	0	0	0
244	48.8	0	-16.9335	-5.79956	-0.0145929	0.341272	0.136481	0.0145929	0.341272	0.136481
245	49	0	-16.9242	-5.83357	-0.0291858	0.682543	0.272962	0.0291858	0.682543	0.272962
246	49.2	0	-16.3	-6.41713	-2.11526	4.3688	-32.0626	2.34615	4.3688	32.0626
247	49.4	0	-16.3569	-7.37192	2.04077	3.14335	18.4268	2.04077	3.14335	18.4268
248	49.6	0	-16.3732	-7.31611	-0.677709	-0.799889	41.101	0.677709	0.799889	41.101
249	49.8	0	-16.3732	-7.31611	0	0	0	0	0	0
250	50	0	-16.3732	-7.31611	0	0	0	0	0	0
251	50.2	0	-16.4317	-7.60308	1.47204	2.43526	-79.0536	1.47204	2.43526	79.0536
252	50.4	0	-16.4825	-7.98276	0.0667358	0.240398	-33.6467	0.531098	0.934076	33.6467
253	50.6	0	-16.46	-7.79624	-0.491716	-0.744796	26.8595	0.491716	0.744796	26.8595
254	50.8	0	-16.5048	-7.55014	-0.556865	-1.23152	12.6047	0.556865	1.23152	12.6047
255	51	0	-16.5702	-6.90634	-1.30842	-3.65177	7.6108	1.30842	3.65177	7.6108
256	51.2	0	-16.644	-6.59328	0.21744	-1.02632	-6.4217	0.21744	1.02632	6.4217
257	51.4	0	-17.0346	-6.20048	1.60096	-4.21951	29.985	1.60096	4.21951	29.985
258	51.6	0	-17.8075	-4.58944	2.56921	-9.8833	128.515	2.56921	9.8833	128.515
259	51.8	0	-17.4409	-3.19166	-2.79863	-6.61042	117.525	2.79863	6.61042	117.525
260	52	0	-16.8532	-2.45846	0.313088	-3.06505	67.5614	0.313088	3.06505	67.5614
261	52.2	0	-16.4005	-2.06801	0.337781	-3.60204	159.098	0.818159	3.60204	159.098
262	52.4	0	-15.2379	-2.27176	-1.69947	-6.25701	160.9	1.69947	6.25701	160.9
263	52.6	0	-14.8487	-2.36736	0.931052	0.133036	21.6092	0.942896	0.303309	44.9298
264	52.8	0	-14.7838	-2.33465	-0.100579	-0.329073	-0.854744	0.470457	0.329073	5.93289
265	53	0	-14.5413	-2.42694	0.0680693	-2.03072	28.3452	0.0866516	2.03072	28.3452
266	53.2	0	-14.324	-2.49613	0.441168	-0.283584	-16.2916	0.441168	0.299595	16.2916
267	53.4	0	-13.8807	-2.42927	1.04493	-2.09394	-3.88653	1.0986	2.09394	17.4527
268	53.6	0	-13.5858	-2.66312	-0.585909	-1.85125	5.05313	0.585909	1.85125	9.50477
269	53.8	0	-13.6616	-2.73288	-0.144627	0.703052	-19.2604	0.328306	0.703052	19.2604
270	54	0	-13.4687	-2.66797	0.926018	-1.22837	-25.7207	0.926018	1.22837	25.7207
271	54.2	0	-13.5135	-2.19998	2.67933	1.71918	-33.2155	2.67933	1.71918	33.2155
272	54.4	0	-14.2555	-0.985038	9.52114	7.15444	-183.813	9.52114	7.15444	183.813
273	54.6	0	-14.351	-0.884507	0.323329	-0.0387189	-5.81494	1.23012	1.64056	41.2449
274	54.8	0	-14.2303	-0.914218	-0.147539	-0.525529	-5.29546	0.37812	1.05455	13.7979
275	55	0	-14.1329	-0.899272	0.141457	-0.0485729	5.12918	0.141457	0.173065	5.12918
276	55.2	0	-14.1653	-1.11879	-1.1751	0.553321	37.7254	1.1751	0.707715	37.7254
277	55.4	0	-14.2253	-1.97688	-7.02284	-1.1384	30.99	7.02284	3.96679	118.594
278	55.6	0	-13.849	-2.61921	2.83523	-0.0630961	-32.5358	8.5266	2.38375	44.8883
279	55.8	0	-14.6772	-1.13923	5.78729	4.04186	-91.3076	5.78729	4.04186	91.3076
280	56	0	-15.8902	-1.03996	3.01661	5.52025	-57.3547	3.01661	5.52025	57.3547
281	56.2	0	-16.6823	-0.712058	3.21588	1.14094	78.7905	3.21588	2.5414	78.7905
282	56.4	0	-16.4209	-0.743002	-1.43836	-0.164321	59.1922	2.05527	4.19813	102.915
283	56.6	0	-17.3951	-0.695586	0.0931311	4.06612	28.3094	0.508547	4.06612	28.3094
284	56.8	0	-17.5635	-0.682311	0.312237	0.538281	29.7696	0.467738	0.538281	29.7696
285	57	0	-18.0845	-0.518592	-0.184742	4.17926	7.47169	1.12453	4.17926	7.47169
286	57.2	0	-19.0949	-0.324552	0.510747	4.44845	57.4669	0.702344	4.44845	57.4669
287	57.4	0	-20.0558	-0.37307	-2.70388	4.88414	-50.2025	2.70388	4.88414	50.2025
288	57.6	0	-20.8546	-0.399979	-0.550168	4.16797	-38.7631	0.550168	4.16797	38.7631
289	57.8	0	-21.3797	-0.154641	1.33239	3.51297	-34.8702	1.33239	3.51297	34.8702
290	58	0	-21.6054	-0.0346332	-0.201816	-0.190779	-12.1187	1.20181	1.55182	12.3888
291	58.2	0	-20.9671	-0.10789	0.111875	-3.89529	38.827	0.20353	3.89529	38.827
292	58.4	0	-20.5026	-0.157849	-0.288905	-1.4582	72.1147	0.616488	1.4582	72.1147
293	58.6	0	-20.566	-0.0890303	0.800912	1.24154	-2.41886	0.940779	1.24154	22.467
294	58.8	0	-20.7843	0.247526	0.824359	1.52931	-19.4515	0.824359	1.52931	19.4515
295	59	0	-20.9599	0.548405	1.29718	0.96339	4.76445	1.29718	0.96339	8.94315
296	59.2	0	-20.9082	0.0377213	-4.18407	-2.57789	100.681	4.18407	2.57789	100.681
297	59.4	0	-21.7718	-0.14774	-0.198327	3.5587	-112.407	4.31339	4.80377	112.407
298	59.6	0	-21.7876	0.0844121	-0.0696172	0.738701	-32.5261	0.651182	0.94708	32.5261
299	59.8	0	-22.0162	-0.249254	-2.61408	2.17018	-73.0773	2.61408	2.21005	73.0773
300	60	1	-23.2606	-0.84949	-0.0542758	7.33306	-109.902	1.25493	7.33306	109.902
301	60.2	1	-24.1004	-1.16484	0.19359	1.9652	-58.3344	0.628875	2.75958	64.4667
302	60.4	1	-23.5468	-0.950081	-0.580603	-2.59253	62.1044	0.580603	2.59253	62.1044
303	60.6	1	-23.5346	-1.06036	-1.28766	-0.89623	30.7732	1.28766	1.6963	31.3312
304	60.8	1	-23.5223	-1.17063	-1.99472	0.800073	-0.558014	1.99472	0.800073	0.558014
305	61	1	-24.3378	-1.71921	1.1947	5.27908	-99.2136	1.32515	5.27908	99.2136
306	61.2	1	-23.9369	-1.68977	-1.61903	-3.00282	41.1775	1.61903	3.00282	41.1775
307	61.4	1	-23.8615	-1.72638	0.110924	0.46777	-32.9353	0.369604	0.46777	32.9353
308	61.6	1	-23.7669	-1.67912	-0.259471	-0.692287	3.73659	0.43978	0.692287	11.8407
309	61.8	1	-23.6287	-1.26874	1.57609	-3.26253	64.1949	1.57609	3.26253	64.1949
310	62	1	-22.7585	-0.813367	-0.964697	-4.25037	97.9604	0.964697	4.25037	97.9604
311	62.2	1	-22.2307	0.135149	4.57027	-1.38177	101.908	4.57027	3.05269	109.058
312	62.4	1	-22.7464	0.500864	2.12719	4.18923	16.1365	2.12719	4.18923	16.1365
313	62.6	1	-23.2602	0.868927	0.372555	0.669321	17.9129	0.372555	1.73211	17.9129
314	62.8	1	-23.3517	0.788882	-1.06728	1.41833	-53.2167	1.52003	1.61355	53.2167
315	63	0	-23.5486	0.384083	-2.30794	-0.0461394	-14.8947	2.30794	0.17525	18.7948
316	63.2	0	-23.4885	-0.0112852	-1.37638	-0.522584	10.7394	1.37638	0.522584	30.2658
317	63.4	0	-23.3143	-0.108093	0.118648	-0.556621	-6.57593	0.739426	0.845745	16.7639
318	63.6	0	-23.9734	-0.798759	-7.51122	5.79644	30.5622	7.51122	5.79644	30.5622
319	63.8	0	-23.9734	-0.798759	0	0	0	0	0	0
320	64	0	-23.0013	-1.20597	-0.427458	-6.19143	163.115	0.963248	6.19143	163.115
321	64.2	0	-23.0986	-0.811082	2.10203	2.95003	-54.8794	2.10203	2.95003	54.8794
322	64.4	0	-23.2969	-0.85153	-1.60236	-0.00281681	24.2064	1.60236	0.63936	24.2064
323	64.6	0	-24.1334	-1.13856	-1.97273	6.18571	-146.459	1.97273	6.33872	146.459
324	64.8	0	-24.8847	-0.776936	0.804486	-0.845446	3.46859	1.54053	4.86131	119.88
325	65	0	-24.6642	-0.918999	-0.790964	0.955884	19.2117	0.790964	1.63343	19.2117
326	65.2	0	-25.3142	-1.07912	-1.61919	3.67301	-39.0201	1.61919	3.67301	39.0201
327	65.4	0	-25.5741	-1.46003	-1.38323	0.23004	-1.35235	1.38323	0.46627	1.35235
328	65.6	0	-25.6944	-1.61312	-0.775084	0.431617	-37.5523	0.775084	0.540928	37.5523
329	65.8	0	-26.0915	-1.76753	0.104676	2.84566	-13.8619	0.37722	2.84566	22.6173
330	66	0	-25.9438	-1.80933	-0.453486	-1.87455	41.9058	0.453486	1.87455	41.9058
331	66.2	0	-25.9782	-1.62175	1.08508	0.836484	33.74	1.08508	0.836484	33.74
332	66.4	0	-25.7103	-1.99597	-2.44077	-3.78783	187.226	2.44077	3.78783	187.226
333	66.6	0	-25.5592	-3.31258	-3.75484	-5.23762	131.928	3.75484	5.23762	131.928
334	66.8	0	-25.1931	-3.87031	1.76744	-3.77552	24.5047	1.76744	4.55588	47.4075
335	67	0	-24.8958	-5.08229	-0.339252	-8.00724	85.4569	0.339252	8.00724	85.4569
336	67.2	0	-24.8589	-5.54631	0.157926	-3.66324	32.9138	0.157926	3.66324	32.9138
337	67.4	0	-24.7383	-7.40541	2.00152	-7.58627	97.386	2.00152	7.58627	97.386
338	67.6	0	-25.0004	-8.18849	0.247882	-5.6342	100.779	1.20513	5.6342	100.779
339	67.8	0	-26.0985	-9.16365	-0.125727	-5.38261	67.6545	0.125727	5.38261	67.6545
340	68	0	-26.1219	-9.21321	0.223025	-3.1387	46.7856	0.348752	3.1387	46.7856
341	68.2	0	-26.1453	-9.26277	0.571777	-0.894795	25.9168	0.571777	0.894795	25.9168
342	68.4	0	-26.6657	-9.9873	3.636	-4.72725	178.813	3.636	4.72725	178.813
343	68.6	0	-27.478	-10.047	-0.925175	-3.64751	93.5013	1.16311	3.64751	93.5013
344	68.8	0	-27.5447	-9.89614	-1.0493	-2.04162	56.5581	1.16827	2.04162	56.5581
345	69	0	-27.6115	-9.74527	-1.17342	-0.435724	19.6148	1.17342	0.435724	19.6148
346	69.2	0	-27.6053	-9.56728	-0.19915	-0.731845	49.2206	0.19915	1.41101	49.2206
347	69.4	0	-28.0309	-9.01884	-0.842152	-3.82811	129.719	1.41155	3.82811	129.719
348	69.6	0	-27.7012	-7.54266	-2.97964	-9.24378	218.371	2.97964	9.24378	218.371
349	69.8	0	-27.1699	-6.70707	-0.818934	-1.98061	72.1157	0.818934	1.98061	72.1157
350	70	0	-27.3571	-6.88167	0.755141	2.39313	-21.7775	0.755141	2.39313	21.7775
351	70.2	0	-27.4841	-7.01764	-0.0755475	0.168992	-48.1888	0.0755475	0.168992	48.1888
352	70.4	0	-27.5698	-7.18674	-0.0140641	1.01274	-37.7706	0.131265	1.01274	37.7706
353	70.6	0	-27.6966	-7.36763	0.45474	1.1705	23.2931	0.45474	1.1705	25.4194
354	70.8	0	-27.5005	-7.96489	-2.86009	2.64389	-11.252	2.86009	2.64389	12.2884
355	71	0	-27.6338	-8.92537	-0.221589	6.51386	-82.3624	0.262164	6.51386	82.3624
356	71.2	0	-27.7485	-10.5145	-0.455152	4.11805	24.8866	0.455152	8.2145	39.4463
357	71.4	0	-28.1578	-9.61597	3.85943	-4.46616	19.0158	3.85943	4.46616	19.0158
358	71.6	0	-28.3131	-9.33758	0.267861	0.565336	-12.8967	0.267861	0.565336	12.8967
359	71.8	0	-28.2935	-9.29698	-0.155563	-0.299863	-0.569791	0.190061	0.299863	0.569791
360	72	0	-28.3064	-9.33707	0.0388964	0.341258	-1.20463	0.0677648	0.341258	1.21005
361	72.2	0	-28.2868	-9.3832	-0.239091	0.112533	1.88895	0.239091	0.156616	1.88895
362	72.4	0	-28.3163	-9.36705	0.198054	-0.0254955	-3.37777	0.322918	0.0611761	3.37777
363	72.6	0	-28.1365	-9.5825	-2.01372	1.23018	-35.206	2.01372	1.23018	35.206
364	72.8	0	-27.8537	-9.90191	-0.508242	1.32757	-45.4052	0.508242	1.32757	45.4052
365	73	0	-27.9737	-10.3704	1.47801	2.46215	-49.2994	1.47801	2.46215	49.2994
366	73.2	0	-28.1545	-10.3478	0.434021	-0.675948	99.1743	0.434021	1.38978	99.1743
367	73.4	0	-28.3959	-11.2531	1.60945	8.56704	-16.5144	1.60945	8.56704	16.5144
368	73.6	0	-28.4948	-11.297	0.681325	0.526792	5.09767	0.681325	0.584716	6.11033
369	73.8	0	-28.6901	-11.143	0.911196	-1.21801	54.0382	0.911196	1.21801	54.0382
370	74	0	-28.6109	-10.7758	0.0777854	-1.99377	58.9377	0.474707	1.99377	58.9377
371	74.2	0	-28.3533	-9.34984	4.45878	-7.36438	74.977	4.45878	7.36438	74.977
372	74.4	0	-28.1789	-8.63186	1.14282	-3.70007	69.7632	1.75634	4.5658	69.7632
373	74.6	0	-27.7423	-8.06495	0.408909	-1.44699	6.45903	0.408909	1.44699	6.45903
374	74.8	0	-26.5471	-7.16747	2.62977	-8.80292	115.256	2.62977	8.80292	115.256
375	75	0	-25.3358	-7.03942	-0.683234	-5.67691	137.734	0.683234	5.67691	137.734
376	75.2	0	-24.5244	-7.89147	-1.71905	-5.26731	122.119	1.71905	5.26731	122.119
377	75.4	0	-24.0762	-8.27987	0.898248	-2.23932	87.773	0.898248	2.23932	87.773
378	75.6	0	-23.9639	-8.85168	-1.32886	-2.42259	68.9634	1.32886	2.42259	68.9634
379	75.8	0	-24.0628	-9.21693	-0.546575	-1.57062	82.3108	0.546575	1.57062	82.3108
380	76	0	-24.0725	-9.44861	0.275637	-1.26754	25.0734	0.275637	1.26754	25.0734
381	76.2	0	-23.989	-9.6667	0.560406	-0.661906	6.20105	0.560406	0.661906	6.20105
382	76.4	0	-23.989	-9.6667	0	0	0	0	0	0
383	76.6	0	-24.1445	-9.75384	-1.19777	-1.24631	84.432	1.19777	1.24631	84.432
384	76.8	0	-24.3128	-9.74829	-1.19075	-0.0513116	73.7825	1.19075	1.33038	73.7825
385	77	0	-24.516	-9.68529	-0.657745	-0.9141	29.7646	0.657745	0.9141	29.7646
386	77.2	0	-24.9056	-9.75945	-1.23911	-2.05851	39.0198	1.23911	2.05851	39.0198
387	77.4	0	-25.4466	-9.84229	-1.19033	-2.06035	33.6816	1.19033	2.06035	33.6816
388	77.6	0	-25.7028	-9.81648	-1.15029	-0.580198	23.6198	1.17536	0.580198	23.6198
389	77.8	0	-26.3594	-9.85444	-0.199653	-3.23467	60.8025	1.08901	3.23467	60.8025
390	78	0	-26.3373	-9.88095	0.163117	0.718398	-4.39887	0.792602	0.718398	8.23199
391	78.2	0	-26.1337	-9.85413	-0.0899053	0.934414	-13.5835	0.0899053	0.934414	13.5835
392	78.4	0	-25.9993	-9.88437	0.35895	0.278201	-10.9665	0.35895	0.375129	10.9665
393	78.6	0	-26.0805	-9.8699	-0.281903	-0.362865	6.50541	0.281903	0.362865	6.50541
394	78.8	0	-26.0627	-9.87269	0.115017	0.0899436	-1.5743	0.115017	0.211467	3.06869
395	79	0	-26.0703	-9.8897	0.0640609	0.0156726	-2.45617	0.0646799	0.1768	2.45617
396	79.2	0	-26.0426	-9.88123	0.0474817	0.131862	0.700513	0.109783	0.131862	0.744287
397	79.4	0	-26.0614	-9.91235	0.0770519	-0.235129	-0.29223	0.0770519	0.235129	0.29223
398	79.6	0	-26.0051	-9.85711	-0.0436851	0.305142	-0.952792	0.519332	0.709218	0.952792
399	79.8	0	-26.0254	-9.91027	0.175543	-0.16252	-0.996587	0.175543	0.16252	0.996587
400	80	0	-26.0342	-9.90079	-0.00199471	0.0161389	-0.230344	0.226485	0.144416	0.76102
401	80.2	0	-26.0216	-9.90604	-0.0108027	0.0130119	0.0304938	0.0108027	0.0130119	0.0304938
402	80.4	0	-26.0179	-9.90453	-0.000579609	0.0192332	0.0488025	0.000579609	0.0192332	0.0488025
403	80.6	0	-26.0158	-9.90571	0.0117496	0.00361726	0.112476	0.0117496	0.00361726	0.112476
404	80.8	0	-26.021	-9.90496	-0.0193387	-0.0301101	-0.234266	0.0193387	0.0301101	0.234266
405	81	0	-26.0236	-9.90716	0.00976445	-0.00783159	0.0701474	0.010405	0.0106423	0.221188
406	81.2	0	-26.0233	-9.9072	0.00106143	0.000584041	-0.111878	0.00106143	0.000584041	0.111878
407	81.4	0	-26.023	-9.90685	-0.00306223	0.00354641	0.164045	0.00412366	0.00354641	0.275923
408	81.6	0	-26.0389	-9.90451	-0.0937983	-0.11159	-0.519403	0.137525	0.11159	0.582331
409	81.8	0	-26.0446	-9.88851	-0.0414626	0.0786396	0.282022	0.0414626	0.0786396	0.282022
410	82	0	-26.0303	-9.89404	0.165499	-0.0228237	-0.0708994	0.230392	0.148897	0.323861
411	82.2	0	-26.026	-9.83496	-0.480029	0.217256	-1.52149	0.480029	0.217256	2.2781
412	82.4	0	-25.5667	-9.41449	-0.0847416	5.11219	-80.1949	2.136	5.11219	80.1949
413	82.6	0	-24.9084	-9.9812	3.98766	-2.71058	-20.9733	3.98766	2.71058	20.9733
414	82.8	0	-25.2585	-9.78875	-3.43226	1.85212	-80.9669	3.43226	2.53606	80.9669
415	83	0	-25.2577	-9.13124	-1.39989	3.10017	-60.3213	1.39989	3.10017	60.3213
416	83.2	0	-25.3033	-9.49399	1.26439	-3.55086	56.148	1.26439	4.04733	74.8947
417	83.4	0	-26.1802	-10.472	-0.65321	-7.15494	128.866	0.65321	7.15494	128.866
418	83.6	0	-28.8614	-10.9134	0.87968	-14.47	228.958	2.10646	14.47	228.958
419	83.8	0	-30.3446	-10.8728	3.1571	-6.72261	156.65	3.1571	7.08884	156.65
420	84	0	-30.6762	-9.66244	-4.99287	-4.63081	210.447	4.99287	4.63081	210.447
421	84.2	0	-30.5034	-9.06433	1.02329	-2.60985	73.8286	1.02329	2.60985	73.8286
422	84.4	0	-30.0168	-8.24161	-1.05991	-4.73132	123.553	1.20417	4.73132	123.553
423	84.6	0	-30.5418	-9.05108	-0.93778	5.47069	-13.0372	1.73703	5.47069	74.592
424	84.8	0	-30.7626	-9.59567	-0.701152	3.78029	-47.2732	1.6499	3.78029	47.2732
425	85	0	-30.9353	-10.4801	-1.07998	4.33004	-60.6393	1.07998	4.33004	60.6393
426	85.2	0	-31.8562	-11.0965	3.75561	2.0571	-34.4943	3.75561	4.75397	94.1968
427	85.4	0	-31.9204	-10.9406	0	0	0	0	0	0
428	85.6	0	-32.1437	-10.7837	1.89077	-1.13242	-29.9742	1.89077	1.33202	29.9742
429	85.8	0	-32.4057	-9.4468	3.44576	-11.0408	27.5336	3.44576	11.0408	27.5336
430	86	0	-32.4057	-9.4468	0	0	0	0	0	0
431	86.2	0	-32.4057	-9.4468	0	0	0	0	0	0
432	86.4	0	-32.4057	-9.4468	0	0	0	0	0	0
433	86.6	0	-32.4057	-9.4468	0	0	0	0	0	0
434	86.8	0	-32.3478	-9.47898	-0.353953	0.0798186	18.1441	0.353953	0.139187	20.6869
435	87	0	-32.3609	-9.22471	1.005	-1.77888	9.77088	1.20158	1.77888	9.77088
436	87.2	0	-32.1484	-8.36395	0.262829	-5.96381	148.062	1.18528	5.96381	148.062
437	87.4	0	-31.0905	-7.28339	2.17214	-5.77682	150.892	2.17214	5.77682	150.892
438	87.6	0	-30.656	-6.84001	1.41642	-1.27496	10.85	1.41642	2.58493	38.6275
439	87.8	0	-30.9139	-6.77456	-0.0229409	0.588779	-26.5574	0.703569	1.71355	42.0789
440	88	0	-30.8197	-6.73942	0.235185	-0.361084	5.91262	0.23919	0.361084	5.91262
441	88.2	0	-30.873	-6.74065	-0.00653374	0.389334	-8.50941	0.254539	0.49827	10.1759
442	88.4	0	-30.7973	-6.74398	-0.00451916	-0.50052	5.33157	0.134814	0.50052	6.83399
443	88.6	0	-30.8577	-6.74882	0.211926	0.439119	-4.86404	0.584253	0.541932	4.86404
444	88.8	0	-30.9096	-6.7447	-0.0715265	0.138146	1.0619	0.251396	0.650322	1.17247
445	89	0	-30.9197	-6.76488	-0.0552648	0.158103	0.167157	0.345825	0.32331	0.524437
446	89.2	0	-30.8286	-6.72839	-0.0160257	-0.860224	3.765	0.0160257	0.860224	3.765
447	89.4	0	-30.8768	-6.75379	0.00282043	0.235367	-3.44182	0.260893	0.317777	3.44182
448	89.6	0	-30.9024	-6.72327	0.0973656	0.214276	-1.7408	0.14316	0.229362	1.7408
449	89.8	0	-30.9087	-6.74696	-0.0749831	-0.102635	-1.36723	0.142967	0.102635	3.03554
450	90	0	-30.9088	-6.7598	-0.0987669	0.070022	-0.995313	0.0987669	0.070022	1.06208
451	90.2	0	-30.908	-6.76759	-0.021812	0.00599445	-0.229453	0.021812	0.00599445	0.229453
452	90.4	0	-30.935	-6.74627	0.340325	0.115504	-1.96679	0.457196	0.115504	1.96679
453	90.6	0	-30.9229	-6.74606	-0.268256	-0.099317	2.25657	0.268256	0.099317	2.25657
454	90.8	0	-30.9055	-6.72713	0.0863206	-0.0999014	-3.45018	0.219357	0.0999014	3.45018
455	91	0	-30.9628	-6.75387	-0.0392266	0.21306	0.342232	0.0611604	0.635271	0.966161
456	91.2	0	-30.9119	-6.72252	0.279261	-0.121443	-1.52021	0.424524	0.329919	2.16492
457	91.4	0	-30.9566	-6.69688	-0.035395	0.0858852	-2.83271	0.121715	0.228395	2.83271
458	91.6	0	-30.9893	-6.74112	-0.0557551	0.351459	-5.63326	0.302247	0.351459	5.63326
459	91.8	0	-31.0131	-6.73484	0.0217926	0.0181012	0.0487603	0.0552153	0.0608483	0.291359
460	92	0	-30.9589	-6.72018	-0.0756138	-0.271405	5.28517	0.100941	0.352764	5.28517
461	92.2	0	-30.9847	-6.70673	0.163063	0.205663	-6.9049	0.163063	0.300246	6.9049
462	92.4	0	-31.0368	-6.69856	0.197283	0.200223	-4.77386	0.197283	0.200223	4.77386
463	92.6	0	-31.0261	-6.70207	0.0197012	0.0847557	0.32104	0.190288	0.428546	2.11001
464	92.8	0	-31.009	-6.72425	-0.226047	-0.161184	3.72777	0.226047	0.209117	3.72777
465	93	0	-31.0673	-6.73753	0.243716	0.375844	-4.76905	0.439738	0.375844	4.76905
466	93.2	0	-31.092	-6.75961	-0.203626	0.0645648	-0.920456	0.323622	0.0645648	1.93472
467	93.4	0	-31.0696	-6.71278	0.0836664	-0.0358919	2.61826	0.345592	0.659069	5.1865
468	93.6	0	-31.0716	-6.70906	0.130841	-0.142994	-5.07588	0.130841	0.184738	5.07588
469	93.8	0	-31.0914	-6.72084	-0.0116093	0.266462	1.34749	0.238937	0.40365	1.4111
470	94	0	-31.0782	-6.76243	-0.196167	-0.245381	-2.62698	0.487121	0.245381	2.62698
471	94.2	0	-31.1223	-6.72707	0.156126	0.166746	1.48715	0.176913	0.410109	1.77341
472	94.4	0	-31.0706	-6.7175	-0.0329697	-0.277145	4.56781	0.034556	0.277145	4.56781
473	94.6	0	-31.1163	-6.72376	0.0418707	0.424538	-6.31657	0.0507267	0.424538	6.31657
474	94.8	0	-30.957	-6.68348	-0.0442953	-1.12766	7.15742	0.129006	1.12766	7.15742
475	95	0	-31.052	-6.5022	1.05129	0.327071	48.949	1.05129	0.707321	48.949
476	95.2	0	-30.7481	-6.67533	-1.62907	-1.8761	139.658	1.62907	1.8761	139.658
477	95.4	0	-30.279	-6.81811	1.38733	-1.57519	9.87204	1.38733	3.06977	15.805
478	95.6	0	-30.2152	-6.66215	0.55957	-0.710791	50.8959	0.55957	0.710791	50.8959
479	95.8	0	-30.7762	-6.82458	-3.72518	1.3007	177.646	3.72518	1.3007	177.646
480	96	0	-31.1972	-6.82415	-0.4304	1.71567	-23.1315	0.645733	1.71567	27.1232
481	96.2	0	-31.6953	-5.41515	4.24093	8.16099	-222.419	4.24093	8.16099	222.419
482	96.4	0	-31.7646	-5.31132	2.61777	5.07794	-144.918	3.03681	5.80338	151.641
483	96.6	0	-31.834	-5.2075	0.994612	1.99489	-67.417	1.83268	3.44577	80.8627
484	96.8	0	-31.9033	-5.10367	-0.62855	-1.08816	10.0843	0.62855	1.08816	10.0843
485	97	0	-31.7304	-5.34439	-0.750967	-0.559977	37.1165	0.750967	0.7182	37.1165
486	97.2	0	-32.165	-6.29878	-7.70047	-2.5609	159.241	7.70047	2.61815	159.241
487	97.4	0	-34.1702	-6.15306	-2.69142	10.8087	-137.552	7.53645	10.8087	137.552
488	97.6	0	-34.0118	-5.6476	0.652118	-2.44389	-12.2147	0.652118	2.44389	43.1807
489	97.8	0	-33.9285	-5.67821	0.119978	0.123868	12.5104	0.332025	1.07337	12.5104
490	98	0	-34.035	-5.57693	0.101986	0.304239	-1.68377	0.101986	0.630104	2.71814
491	98.2	0	-33.8624	-5.4541	0.748083	-0.710787	57.84	1.55888	0.724363	57.84
492	98.4	0	-33.7063	-5.34671	1.4614	0.257365	24.828	1.4614	0.257365	24.828
493	98.6	0	-33.4843	-5.27209	0.718499	-1.22094	4.69939	0.718499	1.25046	4.69939
494	98.8	0	-33.3162	-5.42579	-0.0664158	-0.967257	3.55166	0.0664158	0.967257	3.55166
495	99	0	-33.1833	-5.54326	0.163036	-1.12448	5.18724	0.211653	1.12448	6.80558
496	99.2	0	-32.8756	-5.80153	0.0571983	-2.25792	48.0243	0.813695	2.25792	48.0243
497	99.4	0	-32.7289	-6.3523	-0.776175	-2.99997	72.9261	0.776175	2.99997	72.9261
498	99.6	0	-32.8563	-7.04283	-1.46884	-2.62797	27.4463	1.46884	2.62797	27.4463
499	99.8	0	-32.6761	-7.98008	1.22697	-6.64347	120.645	1.22697	6.64347	120.645
500	100	0	-33.1419	-9.34239	-1.16468	-6.26016	105.493	1.16468	6.26016	105.493
501	100.2	0	-34.4022	-10.0292	-2.59818	-7.97921	193.968	2.59818	7.97921	193.968
502	100.4	0	-35.117	-9.97368	-1.26897	-0.914288	49.7596	1.26897	0.914288	49.7596
503	100.6	0	-35.2502	-9.83567	-0.542471	-0.440233	53.1919	0.542471	0.440233	53.1919
504	100.8	0	-35.6988	-9.68433	-0.438028	-2.7189	70.3411	0.438028	2.7189	70.3411
505	101	0	-35.9894	-9.37007	-0.820353	-2.19631	54.4753	0.820353	2.19631	54.4753
506	101.2	0	-36.4644	-8.80931	-1.1288	-4.02179	76.7151	1.1288	4.02179	76.7151
507	101.4	0	-36.6667	-7.80293	-2.69967	-5.34926	155.965	2.69967	5.34926	155.965
508	101.6	0	-36.5865	-7.69287	0.350419	1.22883	-20.899	0.350419	2.83988	20.899
509	101.8	0	-36.8863	-6.59514	1.10183	-6.87722	84.5715	1.10183	6.87722	84.5715
510	102	0	-37.4101	-5.93337	4.13881	-2.65131	-14.0868	4.13881	2.65131	14.0868
511	102.2	0	-37.3563	-5.88971	-0.403691	-0.711274	1.39358	0.403691	1.26907	7.40577
512	102.4	0	-37.0215	-4.62826	-0.914304	-6.15469	91.5192	0.914304	6.15469	91.5192
513	102.6	0	-36.6832	-4.29207	-0.631736	-2.41902	66.1457	0.631736	2.41902	66.1457
514	102.8	0	-35.7741	-3.40936	0.30637	-7.49334	136.9	0.802271	7.49334	136.9
515	103	0	-34.6414	-3.30776	-2.59993	-5.03469	106.035	2.59993	5.03469	106.035
516	103.2	0	-34.2975	-3.28322	1.2791	0.493519	36.8994	1.81137	2.07523	41.9249
517	103.4	0	-34.6569	-2.82998	1.4265	1.21564	-31.8003	1.42683	1.21564	31.8003
518	103.6	0	-37.02	-2.54283	0.641263	9.0566	65.2926	5.19612	17.521	65.2926
519	103.8	0	-36.6103	-2.82256	0	0	0	0	0	0
520	104	0	-36.715	-2.75305	0.531853	1.09511	-11.1867	0.531853	1.09511	11.1867
521	104.2	0	-37.6992	-2.77083	-0.114563	4.31605	-144.172	0.566616	4.48112	144.172
522	104.4	0	-37.8737	-3.055	-0.589244	2.12529	-62.0747	0.589244	2.12529	62.0747
523	104.6	0	-38.4542	-3.15425	2.51906	3.10768	-103.444	2.51906	3.10768	103.444
524	104.8	0	-38.7819	-3.28044	0	0	0	0	0	0
525	105	0	-38.0437	-3.03472	-2.49555	-3.96374	124.377	2.49555	3.96374	124.377
526	105.2	0	-38.2761	-3.11376	1.64675	3.66218	-17.7483	1.64675	3.66218	17.7483
527	105.4	0	-38.4319	-3.28208	-0.596604	0.833458	23.3534	0.6968	1.74123	23.3534
528	105.6	0	-38.348	-3.75169	-2.94176	2.02805	-20.2512	2.94176	2.12124	33.5223
529	105.8	0	-38.4569	-4.20296	-0.682739	0.645987	-29.6072	0.682739	0.645987	29.6072
530	106	0	-38.4186	-4.33795	-0.526185	0.154013	1.64187	0.526185	0.27972	2.30302
531	106.2	0	-38.8028	-4.59706	0.740384	3.92527	-60.0758	0.740384	3.92527	60.0758
532	106.4	0	-39.3381	-5.22313	0.0988784	4.06945	-28.8509	0.566479	4.06945	28.8509
533	106.6	0	-40.3648	-6.03275	2.83413	4.67246	-15.9226	2.83413	4.67246	19.7039
534	106.8	0	-40.5162	-5.80516	0.8099	-1.85152	101.147	0.8099	1.85152	101.147
535	107	0	-40.0564	-5.34749	-0.134885	-3.42832	102.995	1.84296	3.42832	102.995
536	107.2	0	-40.3757	-5.58536	0.0959959	4.47929	-47.4039	0.58957	4.47929	47.4039
537	107.4	0	-41.2571	-5.88804	1.19242	3.64318	-23.7529	1.50279	3.64318	23.7529
538	107.6	0	-41.4599	-6.07042	-1.6799	0.760208	29.4615	1.6799	0.760208	29.4615
539	107.8	0	-42.3547	-7.06831	-1.48762	5.95127	1.78558	2.06647	5.95127	7.49137
540	108	0	-42.3472	-6.94615	0.290775	-0.794246	36.9159	0.711807	0.794246	36.9159
541	108.2	0	-42.2352	-6.96925	-0.350583	-0.409358	78.469	0.350583	0.409358	78.469
542	108.4	0	-42.434	-7.05617	-0.486719	2.02226	14.242	0.486719	2.02226	14.242
543	108.6	0	-43.7677	-6.82273	1.74694	8.50357	91.0698	1.74694	8.50357	91.0698
544	108.8	0	-44.0435	-7.21344	-1.83268	-3.3984	81.2533	1.83268	3.3984	81.2533
545	109	0	-43.9828	-7.4544	-1.06963	0.610786	13.7945	1.06963	0.759175	13.7945
546	109.2	0	-44.6606	-7.0026	0.392265	4.75214	-53.7259	1.97492	4.75214	53.7259
547	109.4	0	-44.9634	-6.98422	0.144111	0.267034	-18.0404	0.522486	0.267034	18.0404
548	109.6	0	-45.4214	-7.02451	-1.79073	2.92232	44.1352	1.79073	2.92232	44.1352
549	109.8	0	-47.6593	-6.06164	2.187	11.8973	-62.3608	2.187	11.8973	62.3608
550	110	0	-47.6838	-5.73043	0.795317	-1.68298	59.7194	0.853452	2.39054	59.7194
551	110.2	0	-47.4744	-6.25757	-2.17001	-1.73185	66.0138	2.17001	1.73185	66.0138
552	110.4	0	-47.6464	-5.95005	1.0821	2.15474	-48.622	1.46909	2.15474	48.622
553	110.6	0	-47.8647	-5.89916	-0.28324	1.2098	14.0114	0.28324	1.2098	14.0114
554	110.8	0	-47.8627	-5.99646	-0.330148	-0.517288	-2.13959	0.330148	0.517288	2.13959
555	111	0	-48.0607	-6.06075	-0.926548	0.743882	-5.36568	0.926548	0.743882	5.36568
556	111.2	0	-48.2192	-6.07185	-0.480305	0.973775	-11.1508	0.57912	0.973775	11.1508
557	111.4	0	-48.4828	-6.14014	-1.14358	1.29765	-74.9714	1.14358	1.29765	74.9714
558	111.6	0	-48.9607	-6.07257	-0.697448	3.63421	-35.7561	0.940345	3.63421	35.7561
559	111.8	0	-50.3074	-5.76947	1.37737	6.10218	-47.5079	1.37737	6.10218	47.5079
560	112	0	-51.0441	-5.43976	0.946635	3.35695	80.3788	0.946635	3.35695	94.2261
561	112.2	0	-51.1286	-5.82193	-2.37664	-0.658755	28.2649	2.37664	1.53897	50.7829
562	112.4	0	-51.9418	-5.33158	2.311	2.36723	79.1922	2.311	10.5776	96.7506
563	112.6	0	-51.4495	-5.9724	-2.03747	-3.56166	152.974	2.03747	3.56166	152.974
564	112.8	0	-51.536	-6.49205	-0.532119	-0.654156	-4.53998	0.971871	2.48819	42.5448
565	113	0	-51.4791	-5.60251	2.11027	3.22117	-111.878	2.2482	3.24271	111.878
566	113.2	0	-51.0373	-5.95825	0.608723	-2.86801	28.2678	0.608723	2.86801	28.2678
567	113.4	0	-50.9384	-6.07736	0.0854324	-0.576156	4.75736	0.10178	0.576156	4.76271
568	113.6	0	-50.8698	-6.07849	0.318312	-0.098973	-3.08794	0.318312	0.438375	3.08794
569	113.8	0	-50.8426	-6.1066	0.0093609	-0.497975	-0.155967	0.294508	0.497975	2.31213
570	114	0	-50.8274	-6.11066	-0.091536	0.0451754	1.87884	0.172556	0.533712	7.70831
571	114.2	0	-50.7967	-6.21405	-0.06054	-0.254231	2.93484	0.2047	0.731928	11.7261
572	114.4	0	-50.8206	-6.22284	-0.223385	0.0688156	3.10745	0.223385	0.569078	6.38516
573	114.6	0	-50.827	-6.17688	0.328882	0.0837889	-5.47334	0.328882	0.0837889	5.47334
574	114.8	0	-50.8044	-6.28108	-0.307384	-0.468512	8.435	0.307384	0.523501	8.435
575	115	0	-50.8456	-6.22763	0.157064	0.45575	-1.50968	0.157064	0.45575	1.50968
576	115.2	0	-50.8328	-6.23194	-0.184443	-0.297592	-3.58921	0.44233	0.297592	3.58921
577	115.4	0	-50.8201	-6.28084	0.0769242	0.189399	8.01672	0.0769242	1.0754	8.01672
578	115.6	0	-50.8181	-6.23332	0.164774	-0.319898	-2.73841	0.164774	0.452406	2.73841
579	115.8	0	-50.819	-6.27939	-0.167214	-0.00150013	2.4874	0.167214	0.0313459	2.4874
580	116	0	-50.8201	-6.28766	-0.0262906	-0.0482751	0.725823	0.0262906	0.053113	0.725823
581	116.2	0	-50.8079	-6.31529	-0.0436165	-0.103149	0.801465	0.0739977	0.167773	0.923445
582	116.4	0	-50.7777	-6.3813	-0.069782	-0.525196	5.43704	0.164745	0.525196	5.43704
583	116.6	0	-50.7812	-6.38526	0.0493407	0.0868765	1.77633	0.0493407	0.348097	2.67292
584	116.8	0	-50.761	-6.39587	0.108205	0.0232095	-0.191391	0.155754	0.183161	0.191391
585	117	0	-50.7811	-6.42357	-0.206649	-0.00820424	1.0796	0.252213	0.447949	1.6124
586	117.2	0	-50.7891	-6.40594	0.0143465	-0.129054	1.3724	0.0484635	0.319982	1.3724
587	117.4	0	-50.7755	-6.46649	-0.0658813	-0.120951	-0.598516	0.222528	0.335217	3.80599
588	117.6	0	-50.7795	-6.44198	-0.0223255	-0.0340019	2.22704	0.0806499	0.337691	2.22704
589	117.8	0	-50.767	-6.44706	0.132716	0.0834756	1.41564	0.132716	0.0834756	1.41564
590	118	0	-50.7401	-6.49759	-0.0523999	-0.349744	1.1639	0.133741	0.349744	1.1639
591	118.2	0	-50.7501	-6.52306	-0.0267677	-0.176014	1.60859	0.141912	0.482166	2.20604
592	118.4	0	-50.7467	-6.52179	-0.0451886	0.208542	1.38682	0.0861453	0.208542	1.38682
593	118.6	0	-50.752	-6.53012	0.0253234	0.0497323	2.2509	0.112292	0.429201	2.2509
594	118.8	0	-50.7501	-6.5051	0.00910481	-0.0747219	1.79417	0.0949605	0.156158	1.92904
595	119	0	-50.7443	-6.57786	-0.174532	-0.340409	-0.170518	0.174532	0.340409	1.30351
596	119.2	0	-50.7083	-6.60923	0.184664	-0.243217	0.178726	0.184664	0.243217	1.02606
597	119.4	0	-50.7153	-6.56384	0.047006	0.408529	-3.72976	0.047006	0.408529	7.2408
598	119.6	0	-50.883	-6.26056	0.510398	2.73541	-93.6198	0.765049	2.73541	93.6198
599	119.8	0	-51.179	-5.64001	1.32328	2.3096	-95.2692	1.32328	2.3096	95.2692
600	120	0	-51.5036	-5.37262	0.354601	1.67866	-18.6435	0.496825	1.67866	18.6435
601	120.2	0	-51.7932	-5.24823	0.262685	2.68239	-3.78268	0.389156	2.79795	57.9398
602	120.4	0	-53.1636	-4.98264	0.0910529	6.36201	-105.348	0.926374	6.36201	105.348
603	120.6	0	-53.8784	-4.7211	1.51102	2.24066	-56.7699	1.51102	2.51434	59.7383
604	120.8	0	-53.8752	-5.14824	-3.08121	0.803979	57.8839	3.08121	0.803979	57.8839
605	121	0	-54.0868	-5.75911	-3.92136	1.63028	27.7739	3.92136	1.63028	27.7739
606	121.2	0	-55.2595	-5.73329	1.20859	5.85392	-118.922	1.58064	5.85392	118.922
607	121.4	0	-55.1312	-5.56609	0.653887	-1.26528	-10.373	0.653887	1.26528	10.373
608	121.6	0	-55.2183	-5.65293	-0.308389	0.830399	-8.75436	0.308389	0.830399	8.75436
609	121.8	0	-55.6486	-5.95504	-6.20549e-05	3.18371	-37.4173	0.241563	3.18371	37.4173
610	122	0	-56.5241	-6.47741	0.43007	4.89263	-16.5983	0.959092	4.89263	16.5983
611	122.2	0	-56.5582	-6.72547	-1.178	0.102588	21.5091	1.178	0.102588	21.5091
612	122.4	0	-56.753	-7.04369	-0.16478	1.60051	-12.8979	0.16478	1.85952	15.7614
613	122.6	0	-56.6511	-7.0811	-0.377541	0.00912651	7.86609	0.653232	0.872454	7.86609
614	122.8	0	-57.0224	-7.26618	0.339122	1.22978	-46.6088	0.535561	3.23653	46.6088
615	123	1	-56.9788	-7.03207	1.08936	-0.669946	-9.17081	1.08936	0.669946	12.5734
616	123.2	1	-57.0162	-6.8249	-0.0718155	-0.117191	55.4359	1.64181	1.55002	55.4359
617	123.4	1	-55.4566	-6.64703	-0.71388	-8.7924	178.275	2.0578	8.7924	178.275
618	123.6	1	-55.7807	-6.41018	1.06952	2.68078	-60.7333	1.06952	2.68078	60.7333
619	123.8	1	-56.1957	-6.51043	0.652469	2.25391	-108.607	0.983492	2.25391	108.607
620	124	1	-56.7018	-6.70792	1.52913	3.81728	-205.844	1.52913	3.81728	205.844
621	124.2	1	-57.1054	-7.65116	0.980509	6.93533	-134.101	0.980509	6.93533	134.101
622	124.4	1	-57.3547	-8.11094	0.954155	1.00092	13.7995	3.10414	5.21632	117.209
623	124.6	1	-57.0546	-7.37589	-1.07746	-3.12002	71.3283	1.07746	3.12002	71.3283
624	124.8	1	-57.205	-7.8441	0.442643	2.81691	0.597616	0.442643	3.22948	17.0968
625	125	1	-56.9297	-7.55328	-0.607348	-1.76723	43.6948	1.25648	1.76723	43.6948
626	125.2	1	-56.7875	-7.29461	-0.425313	-1.64346	20.3777	0.425313	1.64346	20.3777
627	125.4	1	-56.6491	-7.24243	-0.265566	-0.181068	12.1736	0.265566	0.473305	12.2081
628	125.6	1	-56.6585	-7.22364	0.125192	-0.171732	-4.90656	0.125192	0.171732	4.90656
629	125.8	1	-56.662	-7.22432	-0.0162147	0.0802758	2.06771	0.0162147	0.0802758	2.15046
630	126	0	-56.6549	-7.23486	0.00423128	0.0482677	1.75178	0.212656	0.136732	1.75178
631	126.2	0	-56.6638	-7.23632	0.0555945	-0.0873847	-0.168006	0.251571	0.191444	1.61593
632	126.4	0	-56.6545	-7.25203	-0.124586	0.21481	0.548181	0.245888	0.21481	1.73927
633	126.6	0	-56.67	-7.24523	0.0852528	0.0375286	-1.29721	0.0852528	0.481458	2.46566
634	126.8	0	-56.6442	-7.2343	-0.183422	-0.297644	-1.9721	0.183422	0.297644	1.9721
635	127	0	-56.6628	-7.26234	0.206941	0.291932	2.27073	0.315788	0.291932	2.27073
636	127.2	0	-56.6625	-7.2793	-0.270044	-0.0252988	-3.25932	0.270044	0.073688	3.25932
637	127.4	0	-56.6645	-7.28493	0.178435	0.106377	5.17166	0.178435	0.106377	5.17166
638	127.6	0	-56.6448	-7.25375	0.0389753	-0.229461	2.49815	0.125244	0.229461	2.49815
639	127.8	0	-56.6598	-7.26545	-0.126043	0.0470491	-3.50923	0.341176	0.412427	3.50923
640	128	0	-56.6644	-7.23971	0.139211	-0.169649	2.95352	0.388976	0.494095	2.95352
641	128.2	0	-56.6418	-7.25466	-0.0857953	0.105312	-1.27671	0.0857953	0.365032	4.33255
642	128.4	0	-56.6407	-7.23185	0.198731	-0.00388793	0.694255	0.314627	0.115125	1.30182
643	128.6	0	-56.6455	-7.27117	-0.156186	0.214243	-1.44223	0.363943	0.214243	3.45217
644	128.8	0	-56.6634	-7.27639	-0.0704364	-0.0846354	1.00512	0.248545	0.251871	1.00512
645	129	0	-56.6388	-7.25896	0.0338858	-0.0666986	-0.267528	0.0338858	0.0666986	0.267528
646	129.2	0	-56.6363	-7.22845	0.073449	-0.152928	-0.333466	0.073449	0.152928	0.333466
647	129.4	0	-56.6355	-7.24836	-0.0613001	0.103504	0.281514	0.102762	0.158604	0.442902
648	129.6	0	-56.6367	-7.23931	0.0232674	-0.0274848	-0.0834249	0.0232674	0.0274848	0.0834249
649	129.8	0	-56.6357	-7.24121	-0.0269251	0.0298722	0.0110018	0.0269251	0.0401808	0.0496476
650	130	0	-56.6345	-7.25743	-0.044794	0.061845	0.0502721	0.044794	0.061845	0.0502721
651	130.2	0	-56.6014	-7.19385	0.0513629	-0.468116	-1.85382	0.0513629	0.468116	1.85382
652	130.4	0	-56.5986	-7.20486	-0.0583061	0.172608	-0.924684	0.0583061	0.172608	0.924684
653	130.6	0	-56.5958	-7.21709	-0.0783556	0.0323351	-0.176886	0.0783556	0.0323351	0.176886
654	130.8	0	-56.5977	-7.22353	-0.0110359	0.0128852	-0.00149854	0.0110359	0.0867714	0.0469568
655	131	0	-56.5991	-7.22605	-0.00641385	0.0402526	0.0753785	0.0287984	0.0402526	0.234624
656	131.2	0	-56.5998	-7.22416	0.00927317	-0.00823962	-0.0789453	0.0383129	0.0302055	0.351457
657	131.4	0	-56.6009	-7.2261	0.00802504	-0.00852414	0.248747	0.00802504	0.0460877	0.248747
658	131.6	0	-56.5977	-7.22899	-0.0283066	0.0224069	-0.0689094	0.0283066	0.0224069	0.0689094
659	131.8	0	-56.6011	-7.22312	0.0538504	-0.0212111	-0.0833239	0.0538504	0.0212111	0.239461
660	132	0	-56.6041	-7.22669	-0.0180902	0.0301051	-0.0449847	0.0180902	0.0301051	0.0449847
661	132.2	0	-56.5963	-7.22871	-0.0454918	-0.00607289	0.132963	0.0454918	0.0545652	0.132963
662	132.4	0	-56.6018	-7.22689	0.0471608	-0.0122949	-0.0232902	0.0471608	0.0127381	0.283042
663	132.6	0	-56.5996	-7.21941	-0.023037	-0.0320437	-0.0638738	0.0730267	0.0320437	0.239751
664	132.8	0	-56.6009	-7.22159	0.0152527	0.0231702	0.171264	0.0505627	0.0231702	0.171264
665	133	0	-56.601	-7.22397	0.0104355	-0.0145186	-0.234812	0.0185677	0.0478229	0.234812
666	133.2	0	-56.6031	-7.21837	0.0205252	-0.00416055	0.0231914	0.0205252	0.00416055	0.0231914
667	133.4	0	-56.6025	-7.21839	-0.0254242	0.00411881	0.0723467	0.0461904	0.0108382	0.0723467
668	133.6	0	-56.5949	-7.22541	-0.0623765	0.0127894	0.116766	0.0623765	0.0127894	0.116766
669	133.8	0	-56.5982	-7.23647	0.00359505	0.0575193	-0.10336	0.0673823	0.0575193	0.10336
670	134	0	-56.6021	-7.21839	0.0490597	-0.0909451	-0.227098	0.0490597	0.0909451	0.247819
671	134.2	0	-56.5999	-7.22497	-0.0265054	0.0490366	0.201583	0.044931	0.0490366	0.221555
672	134.4	0	-56.601	-7.2249	-0.00466067	-0.0173691	-0.0903189	0.0150783	0.0418068	0.110176
673	134.6	0	-56.599	-7.22212	0.00423122	-0.00320719	0.000228457	0.00423122	0.00320719	0.00940465
674	134.8	0	-56.5984	-7.22189	-0.00646382	0.00108899	0.0662114	0.00959217	0.00680183	0.0753876
675	135	0	-56.5967	-7.22274	-0.00329656	-0.00864235	-0.0134738	0.010841	0.0151728	0.139995
676	135.2	0	-56.5998	-7.22358	0.0167245	0.00629879	0.16456	0.0167245	0.0497305	0.16456
677	135.4	0	-56.6046	-7.22021	0.0285672	-0.00551749	-0.074169	0.0285672	0.0514937	0.074169
678	135.6	0	-56.6053	-7.21566	-0.00420861	0.0179295	-0.033536	0.0364307	0.0654442	0.033536
679	135.8	0	-56.6007	-7.22087	-0.0393969	-0.010793	0.0535259	0.0393969	0.010793	0.221677
680	136	0	-56.6017	-7.21908	0.0303968	0.00376258	0.00754703	0.0303968	0.0303131	0.520365
681	136.2	0	-56.6149	-7.2151	0.148619	0.00841857	-1.31246	0.203262	0.00841857	1.31246
682	136.4	0	-56.6514	-7.26658	-0.0427444	0.340006	-2.6134	0.123579	0.340006	2.6134
683	136.6	0	-56.6074	-7.23543	-0.162679	-0.332824	1.80668	0.162679	0.332824	1.80668
684	136.8	0	-56.5574	-7.24393	-0.38956	-0.0579677	2.05713	0.38956	0.0579677	2.05713
685	137	0	-56.6138	-7.24104	0.274182	-0.107874	-1.24846	0.274182	0.834232	1.84425
686	137.2	0	-56.6618	-7.25878	0.099168	0.517597	-2.04676	0.20822	0.517597	2.74708
687	137.4	0	-56.6165	-7.23569	-0.151076	-0.410255	0.439785	0.151076	0.410255	0.875028
688	137.6	0	-56.6407	-7.2785	0.00022111	0.375748	3.24927	0.158828	0.375748	3.24927
689	137.8	0	-56.6468	-7.26967	0.0941197	-0.0460375	-1.18588	0.0941197	0.046273	1.18588
690	138	0	-56.6103	-7.2369	-0.0749725	-0.328458	1.76572	0.0867133	0.328458	1.76572
691	138.2	0	-56.6378	-7.29649	-0.0451362	0.540762	-4.70885	0.0451362	0.540762	4.70885
692	138.4	0	-56.6589	-7.2672	0.0415512	-0.291971	3.68764	0.556437	0.291971	4.73297
693	138.6	0	-56.6548	-7.29941	-0.0786996	0.243487	-1.96229	0.365975	0.243487	4.45321
694	138.8	0	-56.6301	-7.25988	0.0542954	-0.119758	2.3203	0.257782	0.629901	2.3203
695	139	0	-56.6198	-7.2463	0.00765992	-0.16542	-0.202264	0.142746	0.342484	0.858646
696	139.2	0	-56.6144	-7.26122	-0.0351367	0.00801089	-0.157395	0.0351367	0.00801089	0.157395
697	139.4	0	-56.6215	-7.26199	0.0381126	0.0192991	0.0850923	0.0381126	0.0192991	0.236581
698	139.6	0	-56.6394	-7.22768	0.227633	-0.0528168	-4.37567	0.227633	0.247778	4.37567
699	139.8	0	-56.5949	-7.13482	0.0727467	-0.870559	8.95897	0.317943	0.870559	8.95897
700	140	0	-56.5826	-7.09852	-0.122043	0.287772	7.98194	0.122043	0.287772	7.98194
701	140.2	0	-56.4868	-7.06391	-0.223021	-0.198861	11.7223	0.53376	0.973886	11.7223
702	140.4	0	-56.2941	-7.01387	-0.938029	-1.12733	51.0628	0.938029	1.12733	51.0628
703	140.6	0	-56.1313	-7.33666	-1.53722	1.28235	22.7979	1.53722	1.44499	47.212
704	140.8	0	-56.4253	-7.60732	-0.032678	1.35314	-13.4393	0.040609	1.35314	13.4393
705	141	0	-56.934	-8.24544	-0.142795	4.09293	-61.9341	0.667651	4.09293	61.9341
706	141.2	0	-57.0766	-8.40958	-0.155064	0.949661	-20.1484	0.453722	0.949661	20.1484
707	141.4	0	-57.1252	-8.73892	-0.606338	2.46807	-27.0782	0.606338	2.46807	27.0782
708	141.6	0	-57.3908	-9.49732	0.161231	3.044	-72.1711	0.1663	3.044	72.1711
709	141.8	0	-57.1356	-9.44003	-1.79867	-0.806925	-41.1956	1.79867	0.806925	41.1956
710	142	0	-56.9376	-9.64692	0.0608653	1.41072	-105.403	1.12272	1.41072	105.403
711	142.2	0	-56.702	-9.86312	-1.15954	1.13906	20.704	1.15954	1.13906	20.704
712	142.4	0	-56.7202	-9.82049	-0.0941142	-0.549411	-31.9445	0.86359	0.549411	42.0867
713	142.6	0	-56.4524	-9.99733	-0.47011	2.1795	-55.3645	0.489535	2.1795	55.3645
714	142.8	0	-56.331	-10.331	0.75207	0.835201	-86.9633	0.75207	1.27079	86.9633
715	143	0	-55.9068	-11.0285	1.98745	4.4837	-99.2762	1.98745	4.4837	99.2762
716	143.2	0	-55.4837	-11.2055	-0.113135	2.7763	-46.8474	0.113135	2.7763	46.8474
717	143.4	0	-55.3186	-11.2974	0.169412	0.909893	-7.13366	0.590311	0.909893	12.3902
718	143.6	0	-55.385	-11.0725	-1.13866	-0.845841	14.232	1.13866	0.845841	14.232
719	143.8	0	-55.6247	-10.7781	-0.794046	-1.41834	11.7908	0.900056	1.41834	11.7908
720	144	0	-55.6167	-11.2009	2.54899	0.972247	-4.12719	2.54899	0.972247	14.1864
721	144.2	0	-55.8236	-11.2362	-0.273788	-1.63288	29.1338	0.385131	1.63288	29.1338
722	144.4	0	-55.6667	-11.3743	0.644965	1.92116	-32.8243	0.644965	1.92116	32.8243
723	144.6	0	-55.4369	-11.473	0.267895	1.10442	-28.4375	0.357813	1.10442	28.4375
724	144.8	0	-55.1411	-11.6172	0.476464	0.879739	-45.2725	0.476464	1.77849	45.2725
725	145	0	-55.0248	-11.5483	-0.456753	0.820783	5.28003	0.472003	0.820783	6.92979
726	145.2	0	-54.9432	-11.5591	-0.0238888	0.378885	-14.6864	0.272041	0.378885	14.6864
727	145.4	0	-54.9843	-11.5552	0.0974339	-0.175335	-3.1514	0.097784	0.334882	7.55739
728	145.6	0	-54.9384	-11.5557	-0.120205	0.270381	0.963805	0.216133	0.270381	1.91158
729	145.8	0	-54.9674	-11.5624	0.0986501	-0.274036	-0.947975	0.147232	0.274036	2.45705
730	146	0	-55.013	-11.5651	0.0280351	-0.306411	0.560158	0.0280351	0.306411	0.560158
731	146.2	0	-54.9924	-11.5502	-0.162178	0.395808	-3.14736	0.167082	0.395808	3.14736
732	146.4	0	-54.9658	-11.5408	0.0873152	-0.0635654	4.41405	0.0873152	0.0635654	4.41405
733	146.6	0	-54.9934	-11.5601	0.0775369	-0.0473062	0.410941	0.112959	0.410794	1.17191
734	146.8	0	-54.9918	-11.5548	0.0338964	-0.144922	-1.37277	0.168445	0.144922	1.37277
735	147	0	-54.982	-11.5531	-0.180751	0.0531748	-0.389327	0.319156	0.285228	2.71551
736	147.2	0	-54.9847	-11.5715	0.266385	0.0467525	-2.73413	0.266385	0.0467525	2.73413
737	147.4	0	-54.9827	-11.5541	-0.0965968	-0.0523354	0.0155599	0.257064	0.189486	0.311832
738	147.6	0	-54.9995	-11.5504	-0.0882339	0.00864704	-0.962492	0.0882339	0.104029	1.87006
739	147.8	0	-54.9982	-11.5578	0.0776908	-0.00211259	-1.44547	0.0776908	0.0927061	1.44547
740	148	0	-55.0375	-11.5405	-0.129466	-0.229302	4.31287	0.129466	0.229302	4.31287
741	148.2	0	-54.9784	-11.5207	-0.0268184	0.335559	-1.16671	0.161542	0.335559	3.85001
742	148.4	0	-55.0081	-11.5456	0.0554196	-0.232298	0.800513	0.145426	0.232298	0.800513
743	148.6	0	-55.052	-11.5315	-0.0857067	-0.181124	0.152742	0.0857067	0.181124	0.381277
744	148.8	0	-55.0025	-11.5219	-0.00771555	0.481578	-1.41415	0.00993325	0.481578	1.81986
745	149	0	-54.9867	-11.5174	-0.0435708	-0.240666	0.645151	0.081933	0.240666	0.645151
746	149.2	0	-55.004	-11.5005	-0.0564697	0.311259	-1.2864	0.0564697	0.803207	1.40114
747	149.4	0	-54.9611	-11.5048	0.038016	-0.311828	1.06078	0.038016	0.644955	3.92544
748	149.6	0	-54.9888	-11.4908	-0.158322	0.218697	-1.57494	0.158322	0.218697	1.57494
749	149.8	0	-54.9822	-11.5161	0.156154	-0.00860909	-2.77416	0.156154	0.120092	2.77416
750	150	0	-55.0453	-11.5131	-0.0751498	-0.364285	1.41434	0.0751498	0.364285	1.41434
751	150.2	0	-55.0425	-11.4941	-0.10831	0.188293	0.410817	0.10831	0.188293	0.657813
752	150.4	0	-54.9769	-11.4992	0.0780515	0.31266	-3.09932	0.0780515	0.31266	3.51354
753	150.6	0	-54.9854	-11.4821	-0.0637014	-0.105211	0.615291	0.182603	0.113557	2.13705
754	150.8	0	-54.9726	-11.4916	0.0466044	0.12382	0.15184	0.0562493	0.145485	2.04269
755	151	0	-54.997	-11.4879	-0.0676506	-0.236885	1.6158	0.0676506	0.236885	1.6158
756	151.2	0	-54.9496	-11.4971	0.0871663	0.299512	-2.22621	0.0871663	0.299512	2.22621
757	151.4	0	-54.9351	-11.4971	-0.03357	0.0377487	-1.7408	0.0816891	0.082695	1.7408
758	151.6	0	-54.9634	-11.4766	-0.109058	-0.153389	-1.32982	0.109058	0.153389	1.32982
759	151.8	0	-54.9619	-11.4966	0.130941	-0.003974	1.09433	0.130941	0.152559	1.09433
760	152	0	-54.9297	-11.4713	-0.125581	0.20467	-1.68676	0.125581	0.208203	3.07396
761	152.2	0	-54.9429	-11.4601	-0.0480255	-0.0588216	-0.151149	0.0497795	0.0588216	0.737816
762	152.4	0	-54.9346	-11.4656	0.0520089	0.0400401	-0.419541	0.0520089	0.0400401	0.419541
763	152.6	0	-54.937	-11.4686	-0.00997677	-0.0182482	-0.189675	0.00997677	0.0182482	0.189675
764	152.8	0	-54.9432	-11.5038	0.335241	-0.0851887	-3.18576	0.335241	0.0851887	3.18576
765	153	0	-54.9974	-11.4888	-0.00422842	-0.352785	-1.17633	0.385934	0.352785	1.17633
766	153.2	0	-54.9818	-11.5029	-0.0508925	0.327904	-0.450563	0.0762429	0.327904	0.450563
767	153.4	0	-54.9742	-11.4941	-0.0553982	-0.250541	0.359496	0.139323	0.272107	0.359496
768	153.6	0	-54.9656	-11.504	0.0358548	0.0416556	-0.544351	0.295581	0.543579	1.44796
769	153.8	0	-54.9585	-11.4985	0.0305064	0.146662	0.0783535	0.0769143	0.210849	0.196272
770	154	0	-54.9395	-11.4907	-0.054374	0.0689664	-2.40481	0.100254	0.239097	2.40481
771	154.2	0	-54.9694	-11.487	-0.00469608	-0.0348487	-0.915852	0.0302769	0.291384	0.915852
772	154.4	0	-54.9471	-11.4869	0.0379119	0.0771578	1.13164	0.0379119	0.0771578	1.89713
773	154.6	0	-54.9416	-11.4849	-0.0171807	0.0262829	-1.70376	0.0420925	0.105554	1.70376
774	154.8	0	-54.9261	-11.4921	0.0603704	0.105061	0.0028031	0.0603704	0.164909	1.56207
775	155	0	-54.9406	-11.4809	-0.0876338	-0.198274	0.699577	0.0876338	0.198274	2.67623
776	155.2	0	-54.961	-11.4868	0.0471296	-0.0795429	-0.846516	0.0683267	0.103799	0.846516
777	155.4	0	-54.9556	-11.48	-0.0274675	0.0834649	0.562918	0.151046	0.0834649	0.958915
778	155.6	0	-54.9606	-11.4765	-0.04675	-0.0263915	0.852481	0.0614147	0.0387771	1.1173
779	155.8	0	-54.9872	-11.4921	0.11256	-0.279621	0.687016	0.11256	0.279621	0.687016
780	156	0	-54.9376	-11.4771	-0.0736421	0.299739	-2.49208	0.0736421	0.299739	2.49208
781	156.2	0	-54.974	-11.4728	-0.0366271	-0.0386467	0.00996214	0.0603609	0.784114	0.927664
782	156.4	0	-54.9469	-11.4422	-0.126067	-0.0664635	0.852613	0.126067	0.0664635	0.852613
783	156.6	0	-54.9743	-11.4819	0.238829	-0.154465	-1.29774	0.238829	0.154465	3.30226
784	156.8	0	-54.9796	-11.4602	-0.16768	0.089353	-1.07913	0.16768	0.204735	4.67528
785	157	0	-54.9194	-11.4534	0.0491628	0.183286	1.51307	0.0657017	0.329041	1.51307
786	157.2	0	-54.9685	-11.4384	-0.14174	-0.208033	-0.316666	0.14174	0.208033	2.14256
787	157.4	0	-54.964	-11.4342	0.0192064	0.131226	1.32496	0.0811282	0.226355	3.36673
788	157.6	0	-54.9336	-11.4348	-0.0395903	0.0678148	-1.64337	0.103163	0.0678148	1.64337
789	157.8	0	-54.9621	-11.399	-0.152796	-0.12029	0.858611	0.15681	0.144498	1.11333
790	158	0	-54.954	-11.4175	0.0731564	-0.0636163	-1.47765	0.151371	0.277709	2.00582
791	158.2	0	-55.014	-11.4282	0.0241552	-0.229152	-0.00140144	0.0624881	0.229152	2.85814
792	158.4	0	-54.9712	-11.4341	0.084328	0.212912	-0.0783145	0.084328	0.246789	1.8809
793	158.6	0	-54.963	-11.4195	-0.0782477	0.0233956	-0.331292	0.102314	0.157832	0.527336
794	158.8	0	-55.0055	-11.4097	-0.0629615	-0.143332	0.753632	0.129405	0.228003	0.753632
795	159	0	-54.9959	-11.4164	0.0425476	0.0417379	0.357924	0.0425476	0.0417379	0.357924
796	159.2	0	-54.9885	-11.4151	-0.0600684	0.0418932	-1.75548	0.174141	0.0418932	4.02279
797	159.4	0	-54.9432	-11.4273	0.238461	0.221423	-0.350426	0.238461	0.221423	3.31696
798	159.6	0	-54.9627	-11.4245	-0.0790159	-0.087047	-1.64235	0.237424	0.171728	1.64235
799	159.8	0	-54.9667	-11.4173	-0.0954857	-0.0297998	-0.219954	0.0954857	0.0518301	1.15775
800	160	0	-54.9618	-11.4055	-0.0816959	0.0980671	-1.09433	0.106875	0.189855	1.93321
801	160.2	0	-54.9973	-11.4212	0.114086	-0.162725	1.6811	0.114086	0.523203	1.6811
802	160.4	0	-54.9368	-11.4318	0.0653832	0.203879	-1.75862	0.106635	0.203879	1.75862
803	160.6	0	-54.9316	-11.4155	-0.0282672	0.0543899	-0.816099	0.172401	0.0627443	0.816099
804	160.8	0	-54.95	-11.416	-0.0235962	-0.0347259	0.8697	0.117099	0.366015	0.8697
805	161	0	-54.9071	-11.4194	-0.0408041	-0.0637962	-1.38584	0.214862	0.671412	1.38584
806	161.2	0	-54.831	-11.3658	0.00466985	0.937236	-17.245	0.49334	0.937236	17.245
807	161.4	0	-54.6314	-11.3448	-0.158628	0.771732	-20.823	0.452508	0.771732	20.823
808	161.6	0	-54.5189	-11.361	0.561276	0.493885	19.1367	0.561276	0.493885	19.1367
809	161.8	0	-54.3958	-11.5167	0.516464	0.199022	8.94854	1.16421	0.529914	8.94854
810	162	0	-54.5553	-11.5128	0.13339	-1.44256	46.1927	0.13339	1.64926	46.1927
811	162.2	0	-55.0191	-11.2895	-2.47786	-2.84719	-26.7856	2.47786	2.84719	26.7856
812	162.4	0	-54.7827	-11.3668	1.10451	1.29921	-95.0348	1.10451	1.29921	95.0348
813	162.6	0	-54.5881	-11.737	1.77204	-0.299595	-62.1578	1.77204	0.299595	62.1578
814	162.8	0	-54.6318	-11.9167	-0.0657285	-0.455241	-9.5743	1.3302	1.11733	9.5743
815	163	0	-54.6862	-11.7223	-1.09612	0.45124	-33.1672	1.09612	0.45124	33.1672
816	163.2	0	-54.5016	-11.417	-0.599089	3.41086	-68.3654	0.599089	3.41086	68.3654
817	163.4	0	-53.9361	-10.6118	0.56971	4.41517	-56.1771	0.56971	4.41517	56.1771
818	163.6	0	-53.6232	-9.68645	-1.25658	3.98408	49.5006	1.88057	3.98408	62.1674
819	163.8	0	-53.4614	-9.42356	1.41119	1.33346	5.57257	1.41119	1.33346	5.57257
820	164	0	-53.4438	-9.54785	-0.373282	-1.33154	35.8432	0.582185	1.33154	35.8432
821	164.2	0	-54.0515	-9.68099	-1.8109	-2.05347	40.2004	1.8109	2.40675	40.2004
822	164.4	0	-54.1901	-9.69171	-0.0462863	-0.847424	-3.39245	0.0462863	0.847424	3.39245
823	164.6	0	-54.2385	-9.70597	0.0392531	0.121322	-29.658	0.452044	0.38989	29.658
824	164.8	0	-54.0705	-9.74726	0.77986	0.245868	-52.1705	0.77986	0.245868	52.1705
825	165	0	-53.7893	-9.73873	2.05201	1.37814	-79.9258	2.05201	1.37814	79.9258
826	165.2	0	-53.6204	-9.31591	0.153058	4.41005	-37.8544	0.153058	4.41005	37.8544
827	165.4	0	-53.7351	-7.91261	-5.16287	8.42959	-10.0188	5.16287	8.42959	10.0188
828	165.6	0	-53.7605	-7.67556	-0.367395	1.43492	-4.93801	0.535112	1.43492	4.93801
829	165.8	0	-53.8094	-7.63546	-0.4663	-0.485604	-3.67378	0.4663	0.566711	3.67378
830	166	0	-53.6981	-7.43867	0.939277	1.91822	-113.845	0.939277	1.91822	113.845
831	166.2	0	-53.7638	-6.10892	3.62101	8.76388	-192.105	3.62101	8.76388	192.105
832	166.4	0	-53.9648	-5.41389	0	0	0	0	0	0
833	166.6	0	-54.8747	-6.68121	-7.84882	-1.07252	-69.9769	7.84882	3.60868	69.9769
834	166.8	0	-55.0996	-6.41813	2.52341	5.08955	-164.891	2.52341	5.08955	164.891
835	167	0	-55.0996	-6.41813	0	0	0	0	0	0
836	167.2	0	-55.4886	-6.72147	-1.83497	1.98415	-7.27909	1.83497	1.98415	36.6991
837	167.4	0	-55.859	-6.75127	-0.195595	1.40168	-43.9988	0.195595	1.40168	43.9988
838	167.6	0	-55.859	-6.75127	0	0	0	0	0	0
839	167.8	0	-55.9022	-6.79983	-0.449188	0.440967	-6.11837	0.449188	0.440967	6.11837
840	168	0	-55.9925	-6.93782	-0.89838	0.0410922	37.9307	1.07888	0.776794	53.8347
841	168.2	0	-55.6973	-7.64414	-3.30311	-2.33883	55.1634	3.30311	2.33883	55.1634
842	168.4	0	-55.8133	-7.79042	0.102264	1.03901	-51.7188	0.691582	1.03901	51.7188
843	168.6	0	-56.1794	-7.62901	0.937921	3.31878	-36.4868	0.937921	3.31878	36.4868
844	168.8	0	-56.3876	-7.6368	-0.316411	1.58685	39.0079	0.434893	1.58685	39.0079
845	169	0	-56.6351	-7.79123	-0.78534	0.227082	92.729	0.78534	0.754814	92.729
846	169.2	0	-56.5668	-7.6592	0.766563	0.716244	17.0622	0.766563	1.54163	17.0622
847	169.4	0	-56.8026	-7.65658	-0.436004	0.545673	31.075	1.31772	0.545673	31.2735
848	169.6	0	-57.0771	-7.33274	1.1085	3.48068	-110.814	1.1085	3.48068	110.814
849	169.8	0	-57.5252	-6.98531	0.221836	0.198187	17.3623	0.596004	3.19737	35.509
850	170	0	-57.0386	-7.4033	-0.816804	-3.51081	147.123	0.816804	3.51081	147.123
851	170.2	0	-57.0715	-7.96532	-1.98538	-0.371751	31.4548	1.98538	3.00349	125.003
852	170.4	0	-57.3854	-7.07931	1.69183	4.30705	-53.1892	1.69183	4.30705	53.1892
853	170.6	0	-57.5623	-6.89614	-0.121775	0.82021	77.0649	0.121775	0.82021	77.0649
854	170.8	0	-58.1778	-6.4893	-2.35363	2.81671	54.146	2.35363	2.81671	54.146
855	171	0	-58.5107	-6.38226	-0.845648	0.957616	36.0399	0.845648	0.957616	36.0399
856	171.2	0	-58.4937	-5.31091	2.01875	6.08676	-80.4858	2.01875	6.08676	80.4858
857	171.4	0	-58.9946	-4.87312	-2.69352	1.6898	135.434	2.69352	1.6898	135.434
858	171.6	0	-59.3001	-4.88344	-1.2109	-0.431327	51.4769	1.2109	0.601868	51.4769
859	171.8	0	-59.4034	-4.81304	-0.106974	0.42025	9.91204	0.106974	0.42025	9.91204
860	172	0	-59.7011	-3.89377	-2.56709	4.29154	10.2596	2.56709	4.29154	10.2596
861	172.2	0	-59.495	-3.24123	0.272204	3.09137	-6.75043	0.57579	3.09137	8.8554
862	172.4	0	-59.2958	-3.00724	1.17389	1.72278	9.2253	1.17389	1.72278	9.2253
863	172.6	0	-59.1183	-3.12268	1.32423	-1.39102	162.723	1.32423	1.39102	162.723
864	172.8	0	-58.9448	-3.0413	1.08448	1.50692	-28.2119	1.08448	1.50692	28.2119
865	173	0	-58.838	-3.18841	0.477945	-1.52226	22.3162	0.514216	1.52226	22.3162
866	173.2	0	-59.3374	-3.75689	-0.649566	-4.15823	138.419	0.972276	4.15823	138.419
867	173.4	0	-60.0906	-3.67479	-2.11083	-2.83381	69.1137	2.11083	2.83381	69.1137
868	173.6	0	-60.0646	-3.43681	-0.617019	1.46258	-11.3064	0.617019	1.46258	24.8166
869	173.8	0	-59.9114	-3.39288	0.0469894	0.0793343	-3.33101	0.0493088	0.566354	8.87534
870	174	0	-59.9783	-3.35582	-0.244619	-0.0861846	15.6931	0.468198	0.25001	15.6931
871	174.2	0	-59.7502	-3.39773	0.638844	1.10288	3.95596	0.638844	1.10288	4.23304
872	174.4	0	-59.6613	-3.39397	0.00231618	0.406144	5.40399	0.430079	0.406144	6.92149
873	174.6	0	-59.6854	-3.31775	-0.548953	-0.32623	40.5206	0.548953	0.32623	40.5206
874	174.8	0	-59.9355	-3.23729	-0.836091	-1.39271	3.78967	0.836091	1.39271	6.59975
875	175	0	-59.8779	-3.00557	-1.24537	1.60253	-88.0022	1.24537	1.60253	88.0022
876	175.2	0	-58.6951	-3.2131	4.60059	5.75498	-104.236	4.60059	5.75498	104.236
877	175.4	0	-58.3658	-3.29649	-0.564977	-0.30906	35.8856	0.644956	1.72527	46.6908
878	175.6	0	-58.8474	-2.78457	-3.53044	1.12464	51.8505	3.53044	6.89641	129.695
879	175.8	0	-58.8143	-3.07016	1.46465	-2.54963	-7.44186	1.8562	2.54963	23.5182
880	176	0	-58.4704	-2.49265	-2.2699	3.36871	-169.83	2.2699	3.36871	169.83
881	176.2	0	-59.0085	-3.18531	0.449686	-7.52973	-13.8902	0.449686	7.52973	41.4435
882	176.4	0	-59.865	-3.97708	-1.67393	-3.18397	21.7133	1.67393	3.18397	23.8541
883	176.6	0	-60.0329	-4.14616	0.181198	-0.808156	-7.64291	0.181198	0.808156	7.64291
884	176.8	0	-60.0329	-4.14616	0	0	0	0	0	0
885	177	0	-60.0818	-3.4114	-3.63005	5.01408	-83.4121	3.63005	5.01408	83.4121
886	177.2	0	-60.264	-2.91473	0	0	0	0	0	0
887	177.4	0	-60.264	-2.91473	0	0	0	0	0	0
888	177.6	0	-60.192	-2.88963	0.589854	0.444559	-16.4646	0.589854	0.444559	16.4646
889	177.8	0	-60.0952	-2.85361	0.140806	-0.101266	10.754	0.140806	0.643467	10.754
890	178	0	-60.0712	-2.76711	-0.135646	0.842866	2.55021	0.152441	0.842866	2.55021
891	178.2	0	-60.0955	-2.6937	-0.307587	0.149311	2.46503	0.307587	0.149311	2.46503
892	178.4	0	-60.7981	-2.58832	-4.718	-1.06532	6.81605	4.718	1.06532	15.8632
893	178.6	0	-61.603	-1.62972	-3.46073	7.62226	-239.948	3.46073	7.62226	239.948
894	178.8	0	-61.8067	-0.316483	4.69162	3.10674	-153.591	4.69162	3.10674	153.591
895	179	0	-62.6831	-0.0719567	-0.934292	6.73059	-148.976	3.33389	6.73059	148.976
896	179.2	0	-64.6261	0.239457	2.71023	7.19573	-120.926	2.71023	7.19573	120.926
897	179.4	0	-64.3729	-0.130318	-2.84659	-1.29829	39.4659	2.84659	1.29829	39.4659
898	179.6	0	-65.0722	-0.760009	0.122604	6.15658	-182.145	1.03818	6.15658	182.145
899	179.8	0	-65.7448	-2.10304	-0.868923	9.1028	-170.267	3.20681	9.1028	170.267
900	180	0	-65.0794	-2.34533	-4.02594	-3.39237	55.4264	4.02594	3.39237	55.4264
901	180.2	0	-64.3802	-2.5773	-1.71588	3.11077	-81.4395	2.10564	3.11077	81.4395
902	180.4	0	-63.8273	-3.74528	-1.45638	5.95168	-117.572	1.45638	5.95168	117.572
903	180.6	0	-63.5164	-3.97016	-0.764047	1.80558	4.18819	0.764047	1.80558	4.44617
904	180.8	0	-63.1695	-4.00525	-1.09127	0.511826	11.5972	1.09127	0.511826	11.5972
905	181	0	-63.06	-4.05698	-0.264363	0.0685045	38.0677	0.264363	0.818546	38.0677
906	181.2	0	-63.0615	-3.88972	-0.482855	-1.18144	54.9741	0.482855	1.18144	54.9741
907	181.4	0	-62.9294	-4.0136	-0.465631	0.968857	20.4665	0.640526	0.968857	20.4665
908	181.6	0	-62.7766	-4.88648	-0.0169437	4.83333	0.614292	0.207402	4.83333	1.74386
909	181.8	0	-62.9728	-5.82895	3.38834	4.28114	-68.8035	3.38834	4.28114	68.8035
910	182	0	-63.2219	-6.10922	0	0	0	0	0	0
911	182.2	0	-63.1711	-6.32847	0.407759	1.99377	-9.83408	0.407759	1.99377	21.1124
912	182.4	0	-62.9615	-6.69926	-0.56856	1.26686	1.97535	0.56856	1.26686	19.0968
913	182.6	0	-62.8014	-6.47095	-0.944932	-0.589926	38.357	0.944932	1.60208	38.357
914	182.8	0	-62.6462	-7.4079	0.959591	4.11724	-19.2638	0.959591	4.75489	19.2638
915	183	0	-62.8054	-7.34055	0.786897	-0.596137	10.6215	0.786897	0.596137	10.6215
916	183.2	0	-62.9257	-6.99459	-0.295055	-2.31724	72.1775	0.295055	2.31724	72.1775
917	183.4	0	-63.0377	-6.45257	0.326521	-2.21638	52.7584	1.00238	2.21638	52.7584
918	183.6	0	-63.0139	-6.34951	0.128611	-0.490353	26.8731	0.128611	0.494712	26.8731
919	183.8	0	-62.9296	-6.71822	-1.65769	4.14414	49.4432	1.65769	5.08225	49.4432
920	184	0	-63.5717	-8.2522	3.04287	11.3064	-139.044	3.04287	11.3064	139.044
921	184.2	0	-63.5134	-8.39036	-0.666365	1.29115	-33.2842	0.666365	1.29115	33.2842
922	184.4	0	-63.3885	-8.70626	-0.618657	1.73142	-36.2563	0.618657	1.73142	36.2563
923	184.6	0	-63.0334	-9.36992	-1.77481	3.31517	-9.91109	1.77481	3.63351	60.5054
924	184.8	0	-63.7063	-9.56876	6.42202	1.31795	25.7998	6.42202	1.31795	25.7998
925	185	0	-64.2478	-9.4089	-1.60864	-1.48685	10.3724	4.53477	1.48685	10.3724
926	185.2	0	-63.6555	-9.27099	-2.08104	-0.203487	79.259	2.08104	1.38654	79.259
927	185.4	0	-63.331	-9.29282	-0.80676	-0.741716	20.1022	0.80676	0.741716	20.1022
928	185.6	0	-62.8824	-8.87805	-1.2057	-4.38014	70.2595	1.2057	4.38014	70.2595
929	185.8	0	-62.3499	-8.62274	-0.838929	0.526832	-17.9673	1.45427	5.19756	71.2695
930	186	1	-62.8193	-8.94111	1.02235	1.29136	35.74	1.02235	1.29136	50.1837
931	186.2	1	-62.9526	-8.72126	1.11752	-0.712125	29.3182	1.11752	0.712125	29.3182
932	186.4	1	-62.6459	-8.176	1.72247	-4.16917	54.0205	1.72247	4.16917	54.0205
933	186.6	1	-61.9637	-7.58596	-0.000207417	-3.56733	39.5995	0.281353	3.56733	39.5995
934	186.8	1	-61.4893	-7.47781	-0.338721	-1.29607	44.1946	0.338721	2.38869	44.1946
935	187	1	-61.5797	-7.51745	-0.0837848	-0.0500947	85.9738	0.164517	0.884372	85.9738
936	187.2	1	-62.255	-7.75607	-0.845805	4.34195	-48.4306	2.29448	4.34195	48.4306
937	187.4	1	-63.3254	-7.56873	2.30446	5.44376	-84.0282	2.30446	5.44376	84.0282
938	187.6	1	-63.8801	-7.58187	0.570871	2.09093	12.7338	0.570871	2.09093	12.7338
939	187.8	1	-63.7307	-8.45734	-4.7324	0.0720944	102.975	4.7324	1.25564	102.975
940	188	1	-63.3838	-8.63935	-0.171143	-0.918708	29.7505	0.988983	2.63549	44.4557
941	188.2	1	-63.9996	-8.15199	2.00347	2.12777	30.9624	2.16128	4.22483	85.3726
942	188.4	1	-63.9132	-7.90526	1.34622	1.97653	66.2791	1.34622	3.71723	76.1564
943	188.6	1	-63.8679	-7.59608	1.77408	-1.86463	38.2704	1.77408	1.88286	38.2704
944	188.8	1	-63.2439	-7.74334	0.526702	-2.54979	79.4639	0.814232	2.54979	79.4639
945	189	0	-63.0206	-8.30291	-0.873205	-2.8976	77.2345	0.873205	2.8976	77.2345
946	189.2	0	-63.0795	-8.09928	0.485907	3.13025	-29.995	0.485907	3.13025	29.995
947	189.4	0	-62.8967	-7.61702	3.41469	1.65002	-34.6335	3.41469	4.91055	80.3859
948	189.6	0	-62.8128	-6.96349	0.720048	0.855926	19.6296	0.720048	0.855926	19.6296
949	189.8	0	-62.7729	-6.95373	0.17239	-0.360165	16.3002	0.218896	0.571098	16.3002
950	190	0	-63.2812	-6.45366	-3.42691	4.44462	115.266	3.58974	4.44462	115.266
951	190.2	0	-63.6483	-6.55303	0.351561	-0.64192	7.29548	0.517626	3.67203	62.3848
952	190.4	0	-63.7275	-5.85278	-0.0132746	2.54915	-72.3445	0.4012	3.04849	72.3445
953	190.6	0	-63.5876	-5.84417	1.08185	-0.522559	7.08864	1.08185	1.32359	10.4125
954	190.8	0	-63.4183	-6.02678	-0.0392654	-1.296	21.5367	0.0392654	1.296	21.5367
955	191	0	-63.533	-6.23186	-0.889782	-0.773666	6.82748	0.889782	0.904468	8.27362
956	191.2	0	-63.9207	-5.86549	-1.43756	2.8085	-40.8714	1.43756	2.8085	40.8714
957	191.4	0	-64.2916	-5.23185	0.386813	3.68488	-103.843	0.441349	3.68488	103.843
958	191.6	0	-64.5502	-4.90145	0.659313	2.13213	92.2356	1.49333	2.13213	98.3263
959	191.8	0	-64.3387	-5.06509	0.480397	-2.45112	58.7641	0.480397	2.45112	58.7641
960	192	0	-64.17	-5.15537	0.523226	-0.114538	11.1936	0.523226	0.114538	11.1936
961	192.2	0	-64.1789	-5.15159	0.183364	-0.00564151	10.9373	0.339862	0.108896	10.9373
962	192.4	0	-64.1878	-5.1478	-0.156498	0.103255	10.681	0.156498	0.103255	10.681
963	192.6	0	-64.2039	-5.31972	-0.105616	-1.14314	-25.5487	0.223858	1.14314	38.146
964	192.8	0	-64.0005	-5.04991	2.24623	1.40329	77.8568	2.24623	1.67663	77.8568
965	193	0	-63.8894	-4.85179	1.36093	2.59355	9.01239	1.36093	2.73022	68.8444
966	193.2	0	-63.7782	-4.65366	0.475623	3.78382	-59.832	0.475623	3.78382	59.832
967	193.4	0	-63.8781	-4.10775	-1.16287	0.873138	-7.93341	2.01734	0.873138	56.3929
968	193.6	0	-64.1362	-3.61739	0.341686	2.69429	-73.4699	0.614029	2.69429	73.4699
969	193.8	0	-64.3435	-4.01934	-2.3967	-1.47025	27.4898	2.3967	1.47025	27.4898
970	194	0	-64.4857	-4.35019	-1.02301	-2.37818	9.75395	1.02301	2.37818	9.75395
971	194.2	0	-64.4703	-4.35661	0.38478	-0.46261	36.262	0.803826	1.24021	36.262
972	194.4	0	-64.5345	-5.22608	-1.19042	-3.98658	177.21	1.19042	4.04988	177.21
973	194.6	0	-64.6016	-5.20241	0	0	0	0	0	0
974	194.8	0	-64.739	-5.59357	0.538323	-1.52982	23.7338	0.68033	3.32864	43.4547
975	195	0	-63.9422	-4.85913	2.32453	5.07443	-95.4843	2.32453	5.07443	95.4843
976	195.2	0	-63.4914	-4.40235	2.0086	1.69973	-7.03706	2.0086	1.69973	21.288
977	195.4	0	-63.3948	-4.50005	0.00247703	-1.66716	91.5134	1.33287	3.02577	91.5134
978	195.6	0	-63.9867	-4.85625	-1.13584	-1.53695	77.1876	2.25711	2.4416	77.1876
979	195.8	0	-63.4612	-4.08531	0.416369	7.82344	-143.47	0.680686	7.82344	143.47
980	196	0	-63.1053	-3.46636	0	0	0	0	0	0
981	196.2	0	-60.9139	-1.93006	10.7982	9.10366	-53.7996	10.7982	9.10366	65.3749
982	196.4	0	-60.7229	-1.78977	0	0	0	0	0	0
983	196.6	0	-60.3216	-1.40901	3.92696	3.6729	-43.5245	3.92696	3.98166	56.5961
984	196.8	0	-59.8427	-1.55027	0.430075	-2.78665	101.926	0.632037	2.78665	101.926
985	197	0	-60.2386	-1.54515	-2.11616	-0.221111	37.7846	2.11616	1.27819	42.5902
986	197.2	0	-60.202	-1.15313	-0.398193	3.14762	-9.44831	0.398193	3.14762	9.44831
987	197.4	0	-60.3574	0.853213	-3.54547	10.2225	-37.6364	4.42436	10.2225	37.6364
988	197.6	0	-59.7274	1.84655	2.98921	5.32259	-57.5557	2.98921	5.32259	57.5557
989	197.8	0	-59.785	1.9501	-2.67391	-2.60114	117.557	4.46519	2.60114	117.557
990	198	0	-60.2038	2.84619	-2.65566	8.1549	-30.7748	2.65566	8.1549	63.1611
991	198.2	0	-60.0775	3.25927	0.348764	-1.71763	66.0795	0.668063	1.71763	66.0795
992	198.4	0	-60.3508	2.97392	-0.213046	-2.38285	41.9862	0.213046	2.38285	41.9862
993	198.6	0	-60.0157	3.04365	0.745018	1.64327	32.7891	2.1537	2.76925	61.5846
994	198.8	0	-59.1265	3.38315	0.965505	8.53215	155.646	0.965505	8.53215	155.646
995	199	0	-59.672	3.44914	1.00926	-5.99415	194.841	1.63313	6.27311	194.841
996	199.2	0	-59.8157	3.81306	-1.36238	-2.29729	169.911	1.43123	2.29729	169.911
997	199.4	0	-59.4171	4.7236	-2.72167	-4.5646	187.777	2.72167	4.5646	187.777
998	199.6	0	-59.3353	4.98974	0.679709	0.378705	-34.763	0.679709	1.98625	34.763
999	199.8	0	-59.4006	4.24967	-0.475355	3.38213	-20.0413	0.503679	3.38213	40.3627
1000	200	0	-58.8965	2.29549	-3.28983	9.113	29.3924	3.28983	9.113	29.3924
1001	200.2	0	-58.9316	2.24304	1.38612	0.32613	53.6073	2.17915	0.32613	53.6073
1002	200.4	0	-59.2056	2.18308	0.552694	0.96341	17.3366	0.552694	0.96341	17.3366
1003	200.6	0	-58.5956	3.86399	3.06413	-9.71814	237.788	3.06413	9.71814	237.788
1004	200.8	0	-57.8375	3.85079	-1.00667	-2.14848	87.6043	1.60631	3.23907	97.4585
1005	201	0	-58.5241	4.21651	3.19052	4.39317	-72.3056	3.19052	4.39317	72.3056
1006	201.2	0	-58.7867	4.31491	-0.535974	-0.83523	16.8857	0.535974	0.83523	16.8857
1007	201.4	0	-58.2182	4.38171	0.0982497	-3.51973	66.7881	0.254111	3.51973	66.7881
1008	201.6	0	-57.9148	4.53571	0.729017	0.064652	72.3367	0.729017	1.08763	72.3367
1009	201.8	0	-58.5233	4.95323	1.07162	4.70425	20.7351	1.07162	4.70425	20.7351
1010	202	0	-59.5517	5.29582	-0.475456	4.21217	-7.31509	0.475456	4.21217	7.31509
1011	202.2	0	-60.1471	5.29885	-0.68902	3.02398	-39.8242	0.68902	3.02398	39.8242
1012	202.4	0	-60.7178	5.13511	-1.67667	2.40284	-17.3939	1.67667	2.40284	17.3939
1013	202.6	0	-61.0565	4.72558	-2.1605	1.02628	41.6007	2.1605	1.02628	41.6007
1014	202.8	0	-61.2008	4.35177	-1.19707	-0.398597	56.539	1.90306	0.856817	56.539
1015	203	0	-60.8501	4.38648	1.03022	-1.22341	49.3376	1.03022	1.22341	49.3376
1016	203.2	0	-60.743	4.56186	0.996151	0.545888	12.8462	0.996151	0.641406	12.8462
1017	203.4	0	-60.8475	4.90199	0.932285	1.45404	-18.2788	0.932285	1.45404	18.2788
1018	203.6	0	-61.0717	5.18781	0.598683	2.72298	-39.0287	0.598683	2.72298	39.0287
1019	203.8	0	-61.3193	5.41976	-0.202221	1.15115	69.4369	2.19865	2.64521	93.3854
1020	204	0	-61.809	5.17885	-2.32297	3.3125	-66.7919	2.32297	4.52032	66.7919
1021	204.2	0	-62.8819	5.1552	-3.09635	2.91837	7.43727	3.09635	2.91837	7.43727
1022	204.4	0	-63.0098	5.31656	1.72165	0.619239	-30.4124	1.72165	0.619239	30.4124
1023	204.6	0	-63.0301	5.55295	1.89906	1.29406	-13.1189	1.89906	1.29406	13.1189
1024	204.8	0	-63.0044	6.6094	6.99094	3.80627	72.9349	6.99094	3.80627	72.9349
1025	205	0	-63.0044	6.6094	0	0	0	0	0	0
1026	205.2	0	-63.588	7.65926	3.71187	5.48144	-94.8065	3.71187	5.48144	94.8065
1027	205.4	0	-64.2736	7.44995	-2.80849	2.00527	75.6517	2.80849	2.42498	75.6517
1028	205.6	0	-63.8719	6.82752	-0.807018	-4.28025	90.2903	1.16392	4.28025	90.2903
1029	205.8	0	-63.4537	6.26575	-0.0552139	-2.6541	83.6097	0.323328	2.6541	83.6097
1030	206	0	-62.7904	5.91296	3.37105	-3.30523	36.9546	3.37105	3.30523	36.9546
1031	206.2	0	-62.1215	5.75546	1.98863	-1.46048	-59.4658	1.98863	1.46048	59.4658
1032	206.4	0	-61.9353	5.44217	-0.0664477	-1.43293	25.786	0.149404	1.43293	25.786
1033	206.6	0	-61.7994	4.79136	-0.814745	-5.75655	41.0393	0.814745	5.75655	41.0393
1034	206.8	0	-61.6562	4.57336	0.682451	-1.65603	7.92573	0.682451	1.65603	7.92573
1035	207	0	-61.4968	4.44045	0.206249	-0.452672	1.31445	0.317404	0.452672	1.31445
1036	207.2	0	-61.3434	3.85596	-0.228751	-3.6454	10.8272	0.690312	3.6454	10.8272
1037	207.4	0	-61.5302	2.73705	-1.8393	-4.78025	8.38336	1.90832	4.78025	8.38336
1038	207.6	0	-61.5016	2.32606	-0.419498	-2.27743	17.2739	0.419498	2.27743	17.2739
1039	207.8	0	-61.3705	1.59815	0.0879126	-3.28932	30.2082	1.20043	3.28932	30.2082
1040	208	0	-61.6101	1.05905	-0.878572	-2.66586	69.9769	0.878572	2.66586	69.9769
1041	208.2	0	-62.061	0.290644	-1.46643	-4.86398	20.8157	1.46643	4.86398	34.2281
1042	208.4	0	-62.1976	-0.484546	0.889463	-2.97885	-81.5155	0.889463	2.97885	81.5155
1043	208.6	0	-61.8873	-0.226866	2.12472	1.83947	-116.478	2.12472	1.83947	116.478
1044	208.8	0	-61.6597	-0.0136716	1.34546	0.225119	-164.754	1.34546	2.09434	164.754
1045	209	0	-61.9817	0.721507	2.99348	3.57457	-128.425	2.99348	3.57457	128.425
1046	209.2	0	-63.0499	1.23616	3.66078	4.78049	-182.814	3.66078	4.78049	182.814
1047	209.4	0	-63.8764	0.819795	-0.861615	3.36012	-67.8298	0.861615	4.91023	74.2008
1048	209.6	0	-63.5323	0.760793	-1.24093	-0.801346	11.8313	1.24093	0.801346	11.8313
1049	209.8	0	-63.6265	0.489161	-1.01208	2.97097	-43.3049	1.01208	2.97097	43.3049
1050	210	0	-64.0721	0.246833	1.67918	3.52955	-89.1775	1.67918	3.52955	89.1775
1051	210.2	0	-64.7958	-0.524628	2.36027	3.99967	-98.0023	2.36027	3.99967	98.0023
1052	210.4	0	-65.0152	-0.9686	0.174579	1.79558	-36.8913	0.419404	1.79558	36.8913
1053	210.6	0	-64.9252	-0.758987	-0.65331	-1.70725	52.4859	0.65331	1.70725	52.4859
1054	210.8	0	-64.6958	-0.388144	-0.733063	-1.87739	30.4174	0.733063	1.87739	30.4174
1055	211	0	-64.668	-0.294781	0.169114	-0.0723827	-2.75261	0.169114	0.0792703	6.93919
1056	211.2	0	-64.6146	-0.234941	-0.315833	-0.448528	6.12977	0.315833	0.448528	6.12977
1057	211.4	0	-64.6153	-0.205745	0.186513	0.03127	1.8787	0.186513	0.204465	3.42262
1058	211.6	0	-64.598	-0.182881	-0.0733387	-0.196584	2.17932	0.266136	0.196584	5.05816
1059	211.8	0	-64.5859	-0.138892	-0.0689625	-0.304303	0.22289	0.0689625	0.304303	2.7917
1060	212	0	-64.5899	-0.172542	-0.0771657	0.254811	0.565388	0.216741	0.262227	2.98664
1061	212.2	0	-64.5528	-0.0974756	0.0127829	-0.454463	0.655562	0.0812203	0.454463	3.06066
1062	212.4	0	-64.5528	-0.122448	0.0144903	0.0754813	0.201286	0.255882	0.482739	1.74927
1063	212.6	0	-64.5699	-0.102791	0.0513825	0.0340664	0.119919	0.0513825	0.0340664	0.119919
1064	212.8	0	-64.5811	-0.0669238	0.0370561	-0.164088	1.7005	0.214428	0.164088	3.70327
1065	213	0	-64.5466	-0.0820615	-0.272453	0.0673006	2.77605	0.272453	0.0673006	2.77605
1066	213.2	0	-64.5502	-0.0620597	0.0373844	-0.194004	0.70305	0.0571428	0.226285	1.8383
1067	213.4	0	-64.5081	-0.0285611	-0.211807	-0.141968	0.797469	0.211807	0.141968	0.797469
1068	213.6	0	-64.5037	-0.0122709	0.19581	-0.0364173	0.271924	0.335499	0.0686157	1.3641
1069	213.8	0	-64.4976	-0.00198036	-0.169866	-0.148592	5.08099	0.169866	0.189856	5.3329
1070	214	0	-64.4656	0.0277807	-0.0346686	-0.187262	-1.34377	0.241862	0.187262	1.34377
1071	214.2	0	-64.4836	0.0756136	0.0650096	-0.0490405	2.59493	0.189504	0.286934	4.69615
1072	214.4	0	-64.434	0.0512902	-0.157223	-0.012735	-0.981712	0.459193	0.0243556	1.08723
1073	214.6	0	-64.4479	0.0549575	0.0274115	-0.0596896	3.36141	0.103358	0.177336	3.36141
1074	214.8	0	-64.4683	0.100395	0.144101	-0.241648	3.24742	0.144101	0.241648	3.91432
1075	215	0	-64.2038	0.481474	-0.578349	-2.25915	58.2698	0.578349	2.25915	58.2698
1076	215.2	0	-64.118	0.521072	-0.317741	-0.0694758	0.327181	0.317741	0.561874	3.93868
1077	215.4	0	-64.2451	0.440533	0.505796	0.665938	-5.56484	0.505796	0.665938	5.56484
1078	215.6	0	-64.2825	0.410729	0.00546316	0.216322	5.41539	0.129041	0.384463	6.27273
1079	215.8	0	-64.1867	0.535751	-0.173015	-1.42385	14.7591	0.350867	1.42385	14.7591
1080	216	0	-64.1448	0.589655	0.101312	0.207871	-1.9573	0.101312	0.207871	1.9573
1081	216.2	0	-64.1094	0.59214	-0.285469	-0.249714	0.812798	0.285469	0.249714	0.812798
1082	216.4	0	-64.0914	0.585748	-0.0780974	-0.125647	-5.86763	0.131267	0.293268	5.86763
1083	216.6	0	-64.1721	0.537618	0.319936	0.477147	-1.96633	0.319936	0.594444	1.96633
1084	216.8	0	-64.1186	0.631148	-0.1094	-0.469987	2.12586	0.1094	0.55996	2.12586
1085	217	0	-64.1146	0.636269	0.0121916	-0.0837678	-0.76175	0.0392584	0.0837678	1.52278
1086	217.2	0	-64.1007	0.62795	-0.180715	-0.0360016	-0.560549	0.180715	0.22784	2.82366
1087	217.4	0	-64.1169	0.58105	-0.0147126	0.267911	-0.50599	0.201057	0.400497	0.741768
1088	217.6	0	-64.1159	0.59433	0.0511793	-0.0794119	0.874245	0.178352	0.140265	0.874245
1089	217.8	0	-64.1078	0.592257	0.00744023	0.0473423	1.00111	0.0504946	0.0473423	1.00111
1090	218	0	-64.1118	0.589582	0.00338744	-0.031078	-0.170983	0.0300486	0.160699	0.170983
1091	218.2	0	-64.1152	0.604197	0.113374	-0.0558814	0.50809	0.16928	0.152664	0.50809
1092	218.4	0	-64.0849	0.635818	-0.000907301	-0.103192	-0.364731	0.458476	0.312063	2.26211
1093	218.6	0	-64.14	0.530472	-0.109763	0.646678	-9.78834	0.262699	0.646678	9.78834
1094	218.8	0	-63.9708	0.661654	-0.573029	-1.83849	5.72578	0.573029	1.83849	8.21188
1095	219	0	-63.804	0.82195	-0.289653	-0.584455	16.2877	0.289653	0.584455	16.2877
1096	219.2	0	-63.6778	0.806475	-0.502368	0.20299	24.3941	0.502368	0.753007	24.3941
1097	219.4	0	-63.7607	0.621521	-0.375057	1.41675	10.8564	0.375057	1.41675	10.8564
1098	219.6	0	-63.8508	0.639707	0.715603	0.522374	4.38953	0.715603	0.698564	4.38953
1099	219.8	0	-64.115	0.579052	0.410065	1.30779	-64.0633	0.842061	1.30779	64.0633
1100	220	0	-64.6721	-0.270554	1.55959	6.53986	-130.831	1.55959	6.53986	130.831
1101	220.2	0	-64.4695	-0.799479	-1.71229	0.566409	-5.8172	1.71229	0.566409	7.97461
1102	220.4	0	-64.0508	-0.896004	-2.43841	0.357193	-72.0449	2.43841	0.76205	72.0449
1103	220.6	0	-63.9529	-1.69603	2.50194	6.25551	-89.202	2.50194	6.25551	89.202
1104	220.8	0	-63.5538	-2.46583	-0.247329	2.56545	36.0962	0.377957	2.56545	36.0962
1105	221	0	-63.2224	-3.0304	-0.181477	2.59858	47.5322	0.912563	2.59858	47.5322
1106	221.2	0	-63.1602	-3.0262	-0.756794	-0.308154	27.0363	0.756794	0.308154	27.0363
1107	221.4	0	-63.2206	-3.39086	1.37391	1.93751	-27.8702	1.37391	1.93751	27.8702
1108	221.6	0	-63.4559	-3.72854	1.4436	1.21234	34.8255	1.4436	1.21234	46.3128
1109	221.8	0	-63.5179	-3.65766	0.509909	-0.114741	17.6283	1.66242	1.99586	29.5614
1110	222	0	-63.5498	-4.0445	-0.927692	-1.82082	152.977	4.181	9.06741	152.977
1111	222.2	0	-62.0397	-2.81941	-3.03096	-5.80695	70.4666	3.03096	6.89675	72.4894
1112	222.4	0	-62.5742	-3.63537	0.05933	4.80927	-51.4022	1.24326	4.80927	51.5401
1113	222.6	0	-62.4488	-3.91189	-1.78403	0.991983	-9.31781	1.78403	0.991983	9.31781
1114	222.8	0	-62.5354	-4.49736	-1.20788	2.6518	21.0142	1.20788	2.80352	35.1505
1115	223	0	-63.3124	-5.20621	1.61602	5.29644	65.8593	1.61602	5.29644	65.8593
1116	223.2	0	-63.1699	-4.90955	0.348225	-2.01915	62.3643	0.348225	2.01915	62.3643
1117	223.4	0	-63.4995	-5.46761	-0.321435	5.41284	-107.892	3.2292	5.41284	107.892
1118	223.6	0	-63.9416	-5.923	-0.72253	1.01066	6.54269	0.84178	1.01066	6.54269
1119	223.8	0	-64.252	-5.8452	2.06493	0.582533	45.6756	2.06493	0.582533	45.6756
1120	224	0	-65.3594	-5.24149	5.22468	1.90277	77.9654	5.22468	4.26686	77.9654
1121	224.2	0	-64.5654	-5.52771	-3.15783	-2.92941	91.3059	3.15783	2.92941	91.3059
1122	224.4	0	-64.4013	-5.56994	0.141946	-0.808477	-40.2592	0.599456	0.808477	40.2592
1123	224.6	0	-64.3748	-5.65066	-0.964278	-0.195407	-3.299	0.964278	1.52604	18.8618
1124	224.8	0	-64.1996	-5.76099	-0.329162	-0.283756	8.45363	0.463827	0.283756	8.45363
1125	225	0	-65.5898	-6.64612	-0.983836	8.71921	-111.118	2.00356	8.71921	111.118
1126	225.2	0	-66.263	-6.87122	1.47228	2.86063	-32.8456	1.47228	2.86063	32.8456
1127	225.4	0	-66.4789	-7.1047	-0.549476	1.27633	115.418	1.78274	1.27633	115.418
1128	225.6	0	-66.7954	-6.89311	1.78776	1.36967	-31.9439	1.78776	1.36967	31.9439
1129	225.8	0	-67.3172	-6.86269	1.06292	3.33751	109.858	1.06292	3.33751	109.858
1130	226	0	-66.5842	-7.25254	-2.93855	-4.29486	99.6281	2.93855	4.29486	99.6281
1131	226.2	0	-66.3991	-7.65138	-1.37012	-1.0416	51.5245	1.37012	2.70608	51.5245
1132	226.4	0	-67.4046	-7.59725	-0.446061	6.51757	-70.9823	0.608247	6.51757	70.9823
1133	226.6	0	-67.6041	-7.79806	-0.921722	0.392724	-1.23438	0.921722	0.392724	6.91258
1134	226.8	0	-67.8862	-8.08234	-1.72792	1.91384	31.0433	1.72792	1.91384	31.0433
1135	227	0	-68.178	-8.21972	-0.392747	0.305372	28.7885	0.392747	1.32476	28.7885
1136	227.2	0	-69.058	-7.75152	3.08748	5.89472	-30.0686	3.66139	5.89472	30.0686
1137	227.4	0	-69.4038	-8.05749	-5.25114	-0.87506	149.656	5.25114	1.28116	149.656
1138	227.6	0	-69.4952	-8.48051	0.215293	0.612531	-33.1958	1.06824	2.02563	37.4302
1139	227.8	0	-69.777	-8.5268	-1.88064	1.06438	35.3388	1.88064	1.8872	35.3388
1140	228	0	-70.237	-8.24415	-0.107292	2.74605	-6.1937	1.54077	2.74605	16.1656
1141	228.2	0	-70.8417	-8.13873	-1.59384	3.28234	46.286	1.59384	3.28234	46.286
1142	228.4	0	-70.162	-6.13457	9.39053	3.10042	37.7142	9.81049	4.25643	37.7142
1143	228.6	0	-70.0933	-6.02461	0.574527	0.897386	19.9612	0.858121	0.897386	19.9612
1144	228.8	0	-70.3075	-6.09518	-1.97746	-0.192996	-5.95741	1.97746	0.192996	5.95741
1145	229	0	-71.0895	-5.98434	-2.56382	3.66782	-122.302	2.56382	3.66782	122.302
1146	229.2	0	-71.6665	-5.66803	-0.390954	2.27803	-60.1884	1.32812	2.68809	69.213
1147	229.4	0	-71.6044	-6.07258	-1.78967	-1.19589	20.3598	1.78967	1.19589	20.3598
1148	229.6	0	-71.2535	-6.05929	1.88916	-1.22867	15.684	1.88916	1.22867	15.684
1149	229.8	0	-70.8449	-5.76527	2.15594	-1.0606	43.4896	2.15594	1.0606	43.4896
1150	230	0	-70.7812	-5.58731	0.382125	-0.015742	48.9069	0.382125	1.28242	48.9069
1151	230.2	0	-70.8279	-5.39808	1.39139	1.79044	-23.497	1.39139	2.43952	72.4039
1152	230.4	0	-70.8745	-5.20885	2.40065	3.59662	-95.9009	2.40065	3.59662	95.9009
1153	230.6	0	-71.3941	-4.72365	-0.939935	1.95006	50.1055	0.939935	1.95006	54.8777
1154	230.8	0	-71.6345	-4.33002	1.16685	1.53619	83.2269	1.43951	2.97032	83.2269
1155	231	0	-71.3302	-4.60041	1.43559	-2.57877	35.1426	1.81629	2.57877	35.1426
1156	231.2	0	-70.6366	-5.91639	-0.222033	-6.73427	46.424	0.886435	6.73427	46.424
1157	231.4	0	-70.48	-6.46833	-0.482557	-3.4764	21.8761	0.531784	3.4764	21.8761
1158	231.6	0	-70.1223	-8.14214	0.0334958	-14.0097	12.8687	0.0334958	14.0097	12.8687
1159	231.8	0	-70.1223	-8.14214	0	0	0	0	0	0
1160	232	0	-70.1223	-8.14214	0	0	0	0	0	0
1161	232.2	0	-73.2715	-4.69417	-15.6729	16.7352	126.015	15.6729	18.7306	126.015
1162	232.4	0	-74.0118	-4.98679	-2.29255	-2.28162	31.077	2.29255	2.28162	31.077
1163	232.6	0	-74.3113	-5.14746	-0.389448	-0.265445	-92.7939	1.0487	1.80429	92.7939
1164	232.8	0	-74.2236	-4.47721	0.659719	2.97322	-119.806	0.913133	2.97322	119.806
1165	233	0	-74.719	-3.60823	0.537991	5.98593	-86.7113	0.537991	5.98593	86.7113
1166	233.2	0	-75.2195	-3.11283	-1.12678	2.82666	-15.4874	1.69195	2.82666	23.8348
1167	233.4	0	-75.6311	-3.29942	-1.36229	0.542059	-34.0481	1.36229	0.970493	34.0481
1168	233.6	0	-75.9769	-3.16338	-0.608039	1.72095	-50.1269	0.608039	1.72095	50.1269
1169	233.8	0	-76.0839	-3.16835	0.00172719	0.319092	6.04467	0.0200511	0.445866	9.89405
1170	234	0	-76.0201	-3.12036	0.368951	-0.340636	15.6396	0.368951	0.340636	15.6396
1171	234.2	0	-76.0201	-3.12036	0	0	0	0	0	0
1172	234.4	0	-76.0595	-3.10056	-0.0294165	0.425667	-5.74151	0.0294165	0.425667	5.74151
1173	234.6	0	-76.0988	-3.08077	-0.058833	0.851334	-11.483	0.058833	0.851334	11.483
1174	234.8	0	-76.1312	-2.89921	0.524755	0.260736	31.3113	1.20304	0.260736	36.3405
1175	235	0	-76.3485	-2.94617	-0.910162	1.17348	-7.8174	0.910162	1.17348	7.8174
1176	235.2	0	-76.3552	-3.04497	-0.184062	-1.56286	49.7435	0.184062	1.56286	49.7435
1177	235.4	0	-76.3839	-2.74046	1.9141	2.47716	41.8552	1.99141	2.88226	41.8552
1178	235.6	0	-76.4116	-2.57164	0.957051	1.23858	20.9276	0.995705	1.44113	20.9276
1179	235.8	0	-76.4393	-2.40282	0	0	0	0	0	0
1180	236	0	-76.4393	-2.40282	0	0	0	0	0	0
1181	236.2	0	-76.415	-2.42608	-0.0802921	0.150646	14.0805	0.275535	1.10927	14.4418
1182	236.4	0	-76.7864	-2.13214	-0.15256	2.56827	-0.842364	1.19472	2.56827	1.17893
1183	236.6	0	-77.2032	-1.6587	-1.01122	3.42214	10.0447	1.42791	3.42214	10.0447
1184	236.8	0	-77.6993	-1.04232	0.895958	3.58491	-42.9546	0.895958	3.58491	42.9546
1185	237	0	-77.7856	-0.778176	0.795323	0.0492858	28.801	0.795323	1.47098	28.801
1186	237.2	0	-76.8436	-1.38461	2.40184	-5.68689	102.213	2.40184	5.68689	102.213
1187	237.4	0	-76.7407	-1.20785	0.449431	2.17483	8.8978	0.449431	2.17483	16.1704
1188	237.6	0	-76.7713	-1.0018	-0.0962697	0.893973	35.2748	0.33874	0.893973	35.2748
1189	237.8	0	-77.0307	-0.5236	-1.34001	3.66541	0.553187	1.34001	3.66541	38.5547
1190	238	0	-77.4133	0.483501	-0.544049	4.97177	-54.2362	0.699026	4.97177	54.2362
1191	238.2	0	-78.0679	1.53302	-0.786414	5.07497	-24.4447	0.786414	5.07497	35.3351
1192	238.4	0	-78.3492	1.66158	-1.76622	1.0237	137.253	1.76622	1.0237	137.253
1193	238.6	0	-77.9784	1.97017	2.21336	2.66234	5.64011	2.21336	3.46573	11.1134
1194	238.8	0	-78.244	2.37424	-1.16494	0.72582	36.5137	1.16494	0.72582	36.5137
1195	239	0	-78.0777	2.89232	1.14696	2.81194	-3.38347	1.14696	2.81194	38.9493
1196	239.2	0	-77.8285	3.3131	1.78663	3.08576	22.7673	1.78663	3.29721	22.7673
1197	239.4	0	-77.6965	3.78817	-0.181989	1.22517	-13.5365	0.673422	1.22517	13.5365
1198	239.6	0	-78.0736	4.18345	-1.87813	1.5159	23.6488	1.87813	1.5159	23.6488
1199	239.8	0	-78.2451	4.45227	-0.827904	2.11394	-9.83913	0.827904	2.11394	9.83913
1200	240	0	-78.2288	4.90404	0.537122	1.62307	-31.3714	0.537122	1.62307	31.3714
1201	240.2	0	-77.9977	5.08837	1.36915	-0.0429004	3.68567	1.36915	1.59577	11.0222
1202	240.4	0	-77.5896	4.719	1.93649	-2.05464	54.8316	1.93649	2.05464	54.8316
1203	240.6	0	-77.5601	4.87679	-0.377497	1.73514	49.0349	1.31221	1.73514	88.0113
1204	240.8	0	-77.1148	5.06472	1.85538	1.3878	-49.2932	1.85538	1.3878	49.2932
1205	241	0	-77.1211	5.4259	-0.77627	2.11233	-2.49178	0.77627	2.11233	14.7511
1206	241.2	0	-76.8397	7.90089	4.67382	14.619	-133.794	4.67382	14.619	133.794
1207	241.4	0	-76.8664	7.80931	-3.11599	-5.7912	139.554	3.11599	5.7912	139.554
1208	241.6	0	-76.9363	7.36906	2.01086	-1.52272	-10.0107	2.01086	1.52272	10.0107
1209	241.8	0	-76.7016	7.1728	1.10513	-0.894162	2.09883	1.62501	0.894162	2.09883
1210	242	0	-76.4689	7.16031	2.16625	0.0792817	0.869132	2.16625	0.303705	11.2077
1211	242.2	0	-76.5893	6.5124	-0.353356	-6.01104	175.969	0.45816	6.01104	175.969
1212	242.4	0	-77.2384	5.97801	-0.948904	-1.66214	24.5521	0.948904	1.66214	24.5521
1213	242.6	0	-77.0716	5.59759	2.19337	-1.58859	-74.6165	2.19337	1.93436	74.6165
1214	242.8	0	-77.624	4.90683	-0.851957	-5.61428	65.82	0.851957	5.61428	65.82
1215	243	0	-78.9363	3.8719	0.645226	-6.94247	68.8912	1.58516	6.94247	68.8912
1216	243.2	0	-79.0288	3.4532	1.06229	-0.583864	-4.83666	1.06229	0.607821	4.83666
1217	243.4	0	-79.8652	2.91949	0.302769	-5.95627	8.6299	0.643578	5.95627	19.1976
1218	243.6	0	-80.9862	2.48541	-0.472347	-7.20487	87.9903	0.472347	7.20487	87.9903
1219	243.8	0	-82.7662	2.38733	0.0243683	-9.74558	127.756	0.480981	9.74558	127.756
1220	244	0	-84.8632	3.35392	-0.968491	-9.61351	179.188	1.25862	9.61351	179.188
1221	244.2	0	-85.3344	4.29573	-0.366397	-4.13463	74.4016	0.422076	4.13463	74.4016
1222	244.4	0	-85.5674	4.85797	0.517178	-2.99527	47.486	0.517178	2.99527	47.486
1223	244.6	0	-85.4778	5.53973	-1.51501	-3.71015	74.5175	1.51501	3.71015	74.5175
1224	244.8	0	-85.1912	6.16029	-1.26694	-3.83016	62.5266	1.26694	3.83016	62.5266
1225	245	0	-85.0199	6.44238	-0.0117344	-1.58545	33.956	1.8099	1.58545	49.3929
1226	245.2	0	-84.368	7.23292	-1.7922	-7.88262	182.568	1.7922	7.88262	182.568
1227	245.4	0	-82.5659	7.79446	-1.04966	-7.81764	223.639	1.04966	7.81764	223.639
1228	245.6	0	-82.1557	7.62095	-0.110969	-0.797424	20.9969	0.110969	1.87063	20.9969
1229	245.8	0	-81.9305	7.45365	-0.575234	-1.57889	29.8472	0.575234	1.57889	29.8472
1230	246	0	-81.9393	7.36341	-0.260115	-0.0848208	2.78855	0.260115	0.139873	5.63985
1231	246.2	0	-81.9733	7.39088	0.113992	0.268154	-4.02601	0.113992	0.268154	4.02601
1232	246.4	0	-81.9327	7.45066	0.20403	-0.0594977	-6.40233	0.603037	0.463961	6.40233
1233	246.6	0	-81.9271	7.44083	-0.0274343	-0.149237	0.807813	0.337688	0.149237	1.15116
1234	246.8	0	-81.9077	7.37689	-0.287101	-0.211733	9.04082	0.287101	0.211733	9.04082
1235	247	0	-81.8419	7.33906	-0.0324303	-0.415851	1.35395	0.382526	0.415851	1.35395
1236	247.2	0	-81.8448	7.31915	0.0787381	0.0878855	13.9873	0.204412	0.0878855	13.9873
1237	247.4	0	-82.0258	7.25811	-0.780352	0.403772	44.6259	0.780352	1.11917	44.6259
1238	247.6	0	-81.925	7.15239	-0.0728084	-0.483852	5.74282	0.177289	0.598778	5.74282
1239	247.8	0	-81.9366	7.16194	0.0779867	0.0939539	-0.145728	0.316733	0.107415	1.74779
1240	248	0	-81.9164	7.13562	-0.292188	-0.407764	-1.0756	0.292188	0.407764	1.0756
1241	248.2	0	-81.9175	7.177	0.0510072	0.144404	0.896825	0.487013	0.144404	1.77918
1242	248.4	0	-81.9082	7.18788	0.233748	-0.0565056	0.195065	0.233748	0.0565056	0.195065
1243	248.6	0	-81.8991	7.19477	-0.0393939	0.108367	-4.54613	0.109738	0.284046	4.54613
1244	248.8	0	-81.8164	7.20111	0.314255	-0.456005	-1.49709	0.314255	0.456005	1.5931

## Sheet: rotational_speed
	Before	After
	1.56539	44.9858
	14.1347	65.5852
	2.71013	96.2209
	10.9182	40.8215
	9.75011	43.7884
	5.39013	60.9853
	51.0577	62.0431
	32.7414	1.74114
	41.5965	50.0165

## Sheet: rotational_speed_stats
Table Analyzed	Rotational speed
Column B	After
vs.	vs.
Column A	Before
Paired t test
P value	0.0225
P value summary	*
Significantly different (P < 0.05)?	Yes
One- or two-tailed P value?	Two-tailed
t, df	t=2.820, df=8
Number of pairs	9
How big is the difference?
Mean of differences (B - A)	32.92
SD of differences	35.03
SEM of differences	11.68
95% confidence interval	5.999 to 59.85
R squared (partial eta squared)	0.4985
How effective was the pairing?
Correlation coefficient (r)	-0.2811
P value (one tailed)	0.2319
P value summary	ns
Was the pairing significantly effective?	No

## Sheet: forward_speed
	Before	After
	0.218563	2.31743
	1.08285	3.71744
	0.275089	4.69126
	0.145537	2.84498
	0.152201	2.47828
	0.137695	2.22675
	2.82034	3.36184
	1.82189	0.205756
	2.59523	2.11318

## Sheet: forward_speed_stats
Table Analyzed	Forward speed
Column B	After
vs.	vs.
Column A	Before
Paired t test
P value	0.0285
P value summary	*
Significantly different (P < 0.05)?	Yes
One- or two-tailed P value?	Two-tailed
t, df	t=2.668, df=8
Number of pairs	9
How big is the difference?
Mean of differences (B - A)	1.634
SD of differences	1.838
SEM of differences	0.6125
95% confidence interval	0.2217 to 3.047
R squared (partial eta squared)	0.4708
How effective was the pairing?
Correlation coefficient (r)	-0.2131
P value (one tailed)	0.291
P value summary	ns
Was the pairing significantly effective?	No
