# Supplementary material for: Multiphoton imaging of neural structure and activity in Drosophila through the intact cuticle
Source: eLife. 2022 Jan 24;11:e69094. doi: 10.7554/eLife.69094 (PMC8846588; doi:10.7554/eLife.69094)
Supplement: Figure 7—source data 1. [file elife-69094-fig7-data1.xlsx]

## Sheet: Long_term_0hr
20200806	fly1
20200807	fly2
20200813	fly3

## Sheet: fly1
Time	gamma-L5	gamma-L4	gamma-L3	gamma-L2	alpha-L	gamma-R5	gamma-R4	gamma-R3	gamma-R2	alpha-R	stimulus			Time	gamma-5	gamma-4	gamma-3	gamma-2	alpha	stimulus
0											0			0	-0.00601873	0.00280812	0.0162022	-0.000932618	0.0135968	0
0.2											0			0.2	-0.0120963	-0.000969583	0.00481066	-0.0057035	0.00788471	0
0.4											0			0.4	-0.0235605	-0.0256335	-0.00134712	-0.0125646	0.0092339	0
0.6											0			0.6	-0.0235372	-0.0225099	-0.0223599	0.00578829	-0.00323873	0
0.8											0			0.8	-0.00922218	-0.00120681	-0.00521198	0.0187304	0.00752191	0
1											0			1	-0.00386372	0.0154657	0.00652514	-0.00119497	0.014233	0
1.2											0			1.2	-0.00452658	-0.00154123	-0.0141381	0.0109538	0.00106155	0
1.4											0			1.4	0.00115756	-0.0134606	-0.0117825	0.00470107	-0.0048984	0
1.6											0			1.6	0.0103531	0.0188542	0.0109994	-0.00411531	-0.00271412	0
1.8											0			1.8	0.0129918	0.0149661	0.0189356	-0.00972175	-0.00135786	0
2											0			2	0.01685	-0.00080983	-0.00480092	-0.00306308	-0.0221005	0
2.2	0.0350087	-0.0249174	-0.0216926	0.0248736	0.00937828	-0.00147385	-0.0632519	-0.00625425	-0.00155489	-0.00310248	0			2.2	-0.0037434	-0.00294563	0.00322298	0.0132471	-0.0109588	0
2.4	0.0238336	-0.0118631	-0.03284	0.00124351	-0.0207143	0.00293517	-0.0209493	-0.0322435	0.0231945	0.023617	0			2.4	-0.015508	-0.0283155	0.0137173	0.0129651	-0.0117861	0
2.6	-0.00424342	0.0213255	-0.0119824	-0.033756	-0.0245577	0.0234644	0.0199163	0.00162603	0.0677858	0.00651486	0			2.6	-0.00986413	-0.0183997	0.00442691	-0.000320188	-0.015584	0
2.8	0.0322429	0.011131	-0.0213559	0.0146318	0.0145276	0.00725389	0.0165545	0.0021221	0.00748894	0.00519285	0			2.8	0.00952482	0.000510004	-0.0277266	-0.0163311	-0.01257	0
3	0.0140322	-0.0489917	-0.0460086	-0.0388688	0.00491186	-0.00467037	-0.00815445	0.00511796	-0.0557955	0.0138446	0			3	-0.00441972	-0.00314132	-0.0214609	-0.0158298	-0.00636994	0
3.2	-0.0214796	-0.0183698	0.0118367	0.0188493	-0.0389073	-0.0393962	-0.015862	0.00812969	-0.0567846	-0.0321893	0			3.2	-0.0143555	0.000373238	0.00340215	0.0173013	4.00837e-05	0
3.4	-0.00955788	-0.013792	0.0278804	0.0853618	-0.0366396	-0.0310011	-0.0103877	-0.0175512	-0.0213202	-0.0173983	0			3.4	-0.0135414	0.000463727	0.00621248	0.00469967	0.00317392	0
3.6	0.0242826	-0.0369914	0.000277566	0.0440232	-0.0112398	0.00936147	-0.0299851	-0.0339995	0.00736253	0.00801788	0			3.6	-0.00162721	0.0114115	-0.0193141	-0.0330739	-0.00461342	0
3.8	0.0316358	0.0279975	0.0331777	0.00718501	-0.00657274	0.0326983	-0.0179795	0.00205307	0.0121133	-0.051248	0			3.8	0.00869468	-0.0013157	0.00836981	-0.00784186	0.0136637	0
4	0.0227747	0.0662396	0.0400527	0.0038945	0.0130513	0.069273	0.0661662	0.0261705	0.00580894	-0.0284527	0			4	0.017892	-0.0143507	0.0321845	0.00700106	0.0193739	0
4.2	0.0247451	0.060915	0.0439647	0.0219708	-0.00910917	0.00158379	-0.0175529	-0.0167528	0.0181104	0.0197113	0			4.2	0.00331358	0.00966056	-0.00999843	-0.0314524	0.0123821	0
4.4	0.0558665	0.0279508	0.0179828	-0.0143415	0.0103844	-0.020676	-0.00802544	0.00383528	-0.00518804	0.0218812	0			4.4	0.00317556	0.0249712	-0.0115841	-0.0250169	0.00626902	0
4.6	0.00664839	0.0195795	-0.0173605	0.0215338	0.0197725	-0.0172199	0.0155196	0.0254527	0.0370622	-0.0048002	0			4.6	0.0135036	-0.00224083	0.0137819	0.001387	0.00900267	0
4.8	-0.0350463	0.0228017	-0.00242459	0.0407153	-0.00248192	-0.0231109	-0.00764798	0.0207114	0.0382153	-0.021348	0			4.8	-0.00983381	-0.0241545	-0.000941339	-0.0118467	0.00449105	0
5	-0.00883451	0.00706892	0.0205729	-0.042047	-0.00101479	0.0040993	0.00844081	-0.00236201	-0.0327966	-0.0100609	0			5	-0.0218423	-0.0141979	-0.0132427	-0.00289969	-0.00424945	0
5.2	-0.0122178	0.00183869	-0.0129728	-0.0769115	0.0201259	0.0291598	0.0434106	-0.0408689	-0.0228155	-0.000138222	0			5.2	-0.0187025	0.00597982	-0.0266445	-0.005905	-0.0127355	0
5.4	-0.00989824	0.0193415	-0.0113592	-0.0195992	0.00773441	-0.0303749	0.0145019	-0.0124793	-0.0191925	-0.0305744	0			5.4	-0.00553866	-0.0207782	-0.00784108	-0.022534	-0.01159	0
5.6	-0.018784	-0.0188723	0.0259741	0.0231396	0.0191301	-0.0119844	0.00904454	0.00919799	-0.0417445	-0.00566132	0			5.6	-0.00664127	-0.00823886	0.000746469	0.0121205	-0.0085214	0
5.8	-0.0268957	-0.0484298	0.00848552	-0.0530262	-0.0115778	-0.0109071	0.0133139	0.0138305	-0.0126142	0.0469697	0			5.8	-0.0166413	0.0175691	-0.0149476	0.015164	-0.00974918	0
6	0.015973	-0.041548	-0.0030456	-0.0415065	-0.0263266	-0.0381364	-0.0560587	0.015628	-0.0131925	0.0384464	0			6	-0.00991393	-0.0120163	0.00412027	-0.00516356	-0.017135	0
6.2	0.0135108	-0.00578866	0.024074	0.0566858	-0.0125023	0.00277234	-0.0460579	0.0194342	-0.0424024	-0.0107652	0			6.2	-0.00170076	-0.00944421	0.00509689	0.00858518	-0.0163716	0
6.4	-0.0229086	0.0258381	0.0333549	0.0726349	-0.0204359	0.0628678	0.0692748	-0.00556156	-0.00852055	-0.0136037	0			6.4	0.02235	0.0192956	0.0142575	0.0104297	-0.023048	0
6.6	0.0378313	0.0127975	0.00401746	0.0305449	-0.00960875	0.040778	0.0428379	-0.0471022	0.0383086	0.016811	0			6.6	0.034657	0.0321518	0.0166224	0.00525316	-0.0160409	0
6.8	-0.0101262	-0.00315061	-0.02988	-0.0333651	0.051694	0.0702686	0.0155888	0.00997014	0.00983781	-0.00583474	0			6.8	0.0355888	0.0256281	0.010592	0.024855	-0.0102396	0
7	-0.0110274	-0.0100908	0.0216264	0.0112014	0.0727516	0.030745	0.0538438	0.0301541	0.0282413	-0.00943903	0			7	0.00872049	0.0134926	0.0323605	0.0051421	-0.019387	0
7.2	0.021552	0.00909038	0.000521777	0.0610316	0.0401273	0.016287	-0.0158658	0.0308328	-0.00307479	0.0274161	0			7.2	0.013022	0.00383055	0.0223784	0.0191393	-0.00505365	0
7.4	0.00684962	0.0138092	-0.0272332	-0.00248099	0.00281542	0.00320167	-0.0325859	-0.0115602	0.0290509	0.0319893	0			7.4	0.0247686	0.0423263	0.00236316	0.00978669	0.0190322	0
7.6	-0.00507543	-0.000408042	-0.0129062	-0.0521762	-0.0208233	-0.0146182	-0.00680417	-0.0396672	0.0558676	-0.00471777	0			7.6	0.021677	0.0243234	0.0109066	0.0111373	0.0120561	0
7.8	0.00863721	-0.0019777	-0.0367095	-0.0235081	-0.0403581	0.00146126	-0.0508418	-0.000249387	-0.0453981	-0.0296095	0			7.8	0.00813108	0.00809343	0.0270836	0.0313614	0.0146649	0
8	-0.0342164	-0.00822221	-0.0299012	-0.0702445	-0.0407944	-0.0331078	0.0439833	-0.0168958	-0.0108886	-0.0397186	0			8	0.00230563	0.0211315	0.0148041	0.0361672	0.00730325	0
8.2	0.00133488	0.000144998	0.00487347	0.0161093	-0.0204316	-0.0304905	-0.00158267	-0.00785053	0.0309542	-0.0159279	0			8.2	0.0208454	0.0357834	-0.0102601	0.0267966	-0.0105221	0
8.4	0.0248017	-0.00296904	-0.0243985	0.00538021	-0.019544	-0.00933406	-0.0428977	-0.0231479	-0.0187855	-0.00980367	0			8.4	0.0237915	0.054241	0.0207189	-0.00620932	-0.0138182	0
8.6	0.0154261	-0.0278044	-0.00920183	-0.0533063	-0.0360537	-0.0319527	-0.0236115	-0.00214599	-0.0108696	0.0243574	0			8.6	0.0233505	-0.00130964	0.0275844	0.0058342	0.00704848	0
8.8	-0.0139386	-0.0161166	0.0314293	-0.00465708	-0.0453803	-0.0375078	0.00100591	0.00588921	0.0162872	0.0223855	0			8.8	0.0216565	0.0241526	0.0168393	0.0188587	0.00572644	0
9	-0.0231335	0.0254499	0.0101	0.035206	-0.0224716	-0.00365383	-0.00153606	-0.0146511	0.000898581	-0.0229445	0			9	0.0443532	0.0736742	0.0411604	0.0166485	0.00137754	0
9.2	0.0186626	0.0318398	0.00538081	-0.00210505	0.0289428	-0.00369281	-0.00541905	0.0271566	0.0164921	-0.00239873	0			9.2	0.054065	0.0572727	0.0491384	0.0436816	0.0110225	0
9.4	0.029342	0.0502938	0.0675516	0.11923	0.0647566	0.00573718	0.0380103	0.0405617	0.00192692	0.0199011	0			9.4	0.0549309	0.0469747	0.0408988	0.0300741	-5.11712e-06	0
9.6	0.0252711	0.0656926	0.0283225	0.0616576	0.0902941	0.0411023	0.0600194	0.011404	0.047521	0.0421903	0			9.6	0.0473381	0.0783055	0.0545751	0.00837816	-0.00221429	0
9.8	0.0388611	0.0129365	0.0138022	0.0791371	0.0473809	0.0643338	0.0525665	0.04517	0.0301167	0.0151606	0			9.8	0.0373032	0.0650558	0.0215181	0.01008	-0.0118095	0
10	0.0191218	0.0264389	0.0404925	0.0848462	0.0293295	0.0867425	0.074496	0.0617856	0.0152855	0.00501041	0			10	0.0668729	0.061374	0.0571936	0.0377672	-0.00666984	1
10.2	-0.0221452	0.0432122	-0.000924686	0.00156745	0.00440834	0.0152059	0.0424951	0.0102756	0.0145377	0.0274736	0			10.2	0.121059	0.141919	0.133217	0.110561	0.0582222	1
10.4	-0.0322187	-0.030027	-0.0708647	-0.0119836	-0.0562692	-0.109886	-0.0721148	-0.0248153	-0.037039	0.00672094	0			10.4	0.15026	0.148043	0.124187	0.116781	0.0957989	1
10.6	-0.0265052	-0.045401	-0.0372159	0.0176406	-0.0145608	-0.0620635	-0.0944056	-0.0202441	-0.06152	-0.0398135	0			10.6	0.135774	0.144308	0.0956591	0.0946575	0.0922575	1
10.8	-0.0047238	-0.0736432	-0.00523119	-0.0342505	0.00753437	-0.00769686	-0.054417	-0.0463293	-0.0442983	-0.0229942	0			10.8	0.117351	0.15411	0.103975	0.0846358	0.0739001	1
11	-0.0106787	-0.0137517	-0.0264729	-0.0792508	-0.0104427	-0.0240228	-0.0427951	-0.0660844	-0.0254096	-0.0370842	0			11	0.109275	0.0894645	0.087792	0.0717711	0.0785182	1
11.2	-0.0253727	-0.0105358	-0.020733	-0.0904158	-0.018167	-0.0567321	-6.34763e-05	-0.0197441	-0.000109206	-0.0208718	0			11.2	0.0889534	0.0974103	0.0755283	0.0849756	0.0719794	1
11.4	-0.0330781	-0.0478647	-0.0182855	-0.0556568	-0.0119929	-0.0316827	0.0213869	-0.0148247	-0.00338853	-0.0312735	0			11.4	0.0756032	0.106651	0.0702831	0.0598855	0.0459132	1
11.6	-0.0363817	-0.0445301	-0.0171435	-0.0200747	-0.0149257	0.0203418	-0.00977348	-0.0518006	-0.0248751	-0.0212531	0			11.6	0.0579882	0.080179	0.0620586	0.0404273	0.056352	1
11.8	-0.00181817	-0.0334164	0.0142149	-0.034083	-0.0122936	0.0291755	-0.0171085	-0.0163651	0.00098528	0.066579	0			11.8	0.0369569	0.0524784	0.0492089	0.0272683	0.0481378	1
12	0.0665549	-0.0217321	-0.0103448	-0.0444183	0.0117719	0.0203051	0.0072608	0.0200368	0.0325129	0.0191811	0			12	0.0175764	0.0230085	0.039415	0.00768098	0.0187795	1
12.2	0.00426847	-0.0355684	0.00878208	-0.0631284	-4.73668e-05	0.0136488	0.0596912	0.0253106	-0.0314626	-0.012381	0			12.2	0.0115687	0.00758338	0.0194463	0.0175537	0.0356548	1
12.4	-0.0249637	0.0032647	0.0293744	-0.0227096	-0.0126242	0.00698824	0.0376389	0.0108972	-0.0559171	-0.00646661	0			12.4	-0.00897659	0.00800801	0.0093613	0.0345068	0.00782038	1
12.6	-0.036571	0.0495471	-0.00905859	0.0163471	0.00657539	-0.0168403	-0.011947	-0.0244209	-0.00619766	-0.00889523	0			12.6	0.00120695	0.0288957	0.0184962	0.00650807	0.00178966	1
12.8	-0.0447246	0.0148774	-0.0291886	0.0112788	-0.00556648	-0.0196114	-0.0356611	-0.037117	0.0444103	0.00108012	0			12.8	-0.00358418	0.0114336	0.00871092	0.015716	0.0242526	1
13	-0.0113726	-0.0276259	0.00062452	0.0105916	-0.0511372	0.011306	-0.0514633	0.00923558	0.0360768	0.0176232	0			13	-0.0111522	0.00243403	-0.0200134	0.00924725	0.026667	0
13.2	0.0169074	0.0242233	-0.00205065	0.0191994	-0.0368109	0.0217091	-0.0501863	0.0538869	-0.0282064	-0.000905698	0			13.2	-0.00698459	0.0267419	-0.00375851	-0.00622754	0.0121785	0
13.4	0.0102844	0.0456787	-0.00218531	-0.014076	-0.00430048	0.0144609	-0.00337926	0.0207961	-0.0650221	0.00364971	0			13.4	-0.0175137	0.0308565	0.00993197	0.0184149	0.00215454	0
13.6	-0.00124941	0.0439944	0.00145013	0.0202851	-0.0189028	0.00613948	-0.00254957	-0.012564	0.0354328	-0.00800679	0			13.6	-0.0243369	-0.00124326	-0.0107772	-0.0143161	-0.0174874	0
13.8	0.01434	-0.0170937	-0.0207212	0.0120304	0.017618	-0.017234	-0.0370157	0.00969637	0.0735194	-0.000410213	0			13.8	-0.0159139	0.0202798	-0.0160536	0.0189511	-0.00871044	0
14	0.00156209	-0.0542495	-0.00924785	0.0339114	0.0028123	-0.0123219	-0.019135	-0.0370776	0.0576058	0.0213731	0			14	-0.0104391	0.0205155	0.00696193	0.0279268	-0.0163472	0
14.2	-0.00401868	-0.0152659	0.0225972	0.0344787	-0.0273684	0.0156551	0.0320524	-0.0585898	0.0319969	0.0244925	0			14.2	-0.00171552	-0.0177109	0.00821955	0.0114671	-0.0227041	0
14.4	0.0185931	0.0117901	0.00767037	-0.0453611	0.00746895	0.00637818	0.0398888	0.0305125	-0.0307916	0.0012195	0			14.4	0.00226176	0.0183589	0.013191	0.026337	-0.0253463	0
14.6	-0.0237322	-0.0165701	-0.0239108	-0.0182142	-0.0386051	-0.0309098	0.0149384	0.0195193	-0.0570359	-0.0362369	0			14.6	-0.0140336	0.0167211	-0.000556101	0.0117614	-0.0309709	0
14.8	-0.0157126	-0.00161295	-0.0455474	-0.0237338	-0.042363	-0.0425042	-0.0242548	0.0349873	-0.0288222	-0.0527561	0			14.8	-0.00113474	-0.0215261	-0.000849337	-0.00979728	-0.0179785	0
15	-0.00637589	-0.0259177	0.000411847	-0.0480427	0.00530203	-0.0300629	-0.0200104	0.0342132	0.0113943	-0.0236524	0			15	0.013817	0.0266031	0.00709936	-0.0046024	-0.00966079	0
15.2	-0.00377461	-0.00190382	0.038886	0.00224735	0.0311977	-0.0163552	0.030339	-0.0516163	-0.0111481	-0.000540053	0			15.2	-0.0116818	0.0195933	-0.0043415	0.00291247	-0.00796593	0
15.4	-0.0134065	0.00323744	-0.0210485	0.0351696	0.00285239	-0.023484	0.004122	-0.0885613	-0.0560357	-0.0161796	0			15.4	-0.0212235	-0.02711	-0.0157369	-0.0129691	-0.019782	0
15.6	-0.0282294	-0.0311123	-0.0827451	0.00574218	-0.00813537	-0.0201691	-0.0591922	-0.0427186	-0.04616	0.000831005	0			15.6	-0.00343453	-0.012284	-0.0145397	-0.0248417	-0.0131602	0
15.8	-0.00612752	0.0219894	-0.0156104	0.00933374	0.0261192	0.0174105	-0.0208978	-0.0138622	-0.0205483	0.0532601	0			15.8	-0.00781686	-0.0109596	-0.0301321	-0.0208818	-0.00988608	0
16	0.0287765	0.0646854	0.0507698	0.0321217	0.00992641	0.0214148	0.00273547	0.040936	-0.0435123	0.00719086	0			16	-0.00234888	-0.00671295	-0.0136792	-0.022693	-0.00127376	0
16.2	-0.02171	-0.0202088	-0.00433979	0.0644863	0.0253997	-0.0026214	-0.0166168	-9.30025e-05	0.0061888	0.0126125	0			16.2	-0.0116659	0.0162163	0.00951592	-0.00666937	-0.00331717	0
16.4	0.0102726	-0.00327561	-0.00742113	-0.00454778	-0.00215785	-0.00307853	-0.00469744	0.0326747	0.0733042	0.006934	0			16.4	-0.0298107	-0.0126265	-0.0192201	-0.0100131	-0.00502321	0
16.6	0.0097731	0.00800635	0.0306824	-0.0320582	-0.0155485	0.0203311	-0.00273203	0.0711916	0.0332116	-0.0073368	0			16.6	-0.0161861	-0.0115232	-0.00515241	-0.0144149	-0.00129705	0
16.8	-0.0274587	-0.0180463	0.037408	-0.0111602	-0.000234901	0.0291278	-0.0426065	0.0362411	-0.0132107	-0.0120786	0			16.8	-0.0134216	-0.00566418	0.0135155	-0.0155865	-0.0187587	0
17	0.0121253	0.00297744	0.0193914	-0.0222396	0.0102409	0.00127919	-0.035924	0.00784642	0.0115027	-0.0107463	0			17	-0.00547558	-0.00630348	0.00922806	0.00384186	-0.0183435	0
17.2	0.046365	0.00409734	0.000721918	-0.00847402	0.0274971	-0.0155588	0.0517678	0.0109556	0.0104453	-0.00310636	0			17.2	-0.0152444	0.00585687	0.00878271	0.00531228	-0.0140736	0
17.4	0.0228436	-0.00937711	0.0135574	-0.0231275	0.00630895	0.0364202	0.070304	-0.0183701	0.052284	-0.0295236	0			17.4	-0.00877518	0.00344151	-0.0121488	-0.0120878	-0.00175985	0
17.6	0.0161337	-0.075936	0.0389331	-0.00587825	0.0550692	0.00467546	0.0675502	0.0277372	0.0295022	0.000468321	0			17.6	0.0192241	-0.00562852	0.0110003	0.00420586	-0.00592238	0
17.8	0.0108825	0.0182583	0.0328134	0.0200625	0.0262996	0.0340579	0.0284701	0.0173764	-0.0240768	0.00862321	0			17.8	0.000190238	-0.0145309	-0.00728716	0.0181307	-0.00989243	0
18	0.00911241	0.0735888	0.0335693	-0.0103747	-0.00210282	0.0296492	0.0116995	-0.0230787	0.0298889	0.00559933	0			18	-0.000573568	-0.00160127	-0.032998	0.0152468	0.00581436	0
18.2	-0.0130633	-0.00878562	0.00267405	-0.027651	0.0311212	-0.0263206	0.0209337	-0.00259629	0.0563344	0.00902918	0			18.2	-0.00311312	0.00300145	0.0085298	0.0220833	0.0184934	0
18.4	-0.0397509	-0.0268403	-0.0788547	0.00497048	0.0235639	-0.0108982	-0.0044002	0.0114366	-0.049547	-0.000483826	0			18.4	0.0106114	0.00561955	0.0278231	0.00758913	0.0149767	0
18.6	-0.00183325	-0.00133743	-0.0622546	-0.0202729	-0.00612921	-0.0224436	-0.0163065	-0.0390816	-0.0490524	0.0120886	0			18.6	0.00606753	0.014205	0.0154145	-0.00750971	0.00371621	0
18.8	-0.038539	0.00421611	0.00984693	0.0164942	-0.0138752	-0.0359127	0.0125483	-0.0290956	-0.05452	0.00139006	0			18.8	-0.0154668	0.0231365	0.00389129	0.00416579	0.00531227	0
19	-0.0139555	0.0171721	0.0178372	0.0271046	-0.0116394	-0.0254097	-0.0202793	-0.0103157	-0.0205977	0.0185118	0			19	0.0105316	-0.00879293	-0.0102116	0.0193593	0.0153356	0
19.2	0.0403803	0.038546	-0.00688675	-0.0181517	-0.0617062	0.00300259	-0.0147942	0.00483205	0.0617964	0.0395235	0			19.2	0.00896853	-0.00969408	-0.00686332	0.00307899	-0.00238794	0
19.4	0.00728567	0.00618936	0.00257645	-0.0588616	-0.0495784	0.0174261	0.00783039	0.00742783	0.02201	0.0217495	0			19.4	0.018554	0.00774027	0.0162455	-0.00154889	0.00423104	0
19.6	-0.0299846	-0.00319859	0.00287021	-0.00454964	0.0176099	0.0114061	0.0120861	0.0243786	-0.0543038	-0.00728807	0			19.6	0.014911	-0.0067232	0.0126591	-0.0033436	0.0136035	0
19.8	0.0182216	0.0449535	-0.0199179	0.0850291	0.00498443	0.00782718	0.0345263	0.0304914	0.0444772	-0.0102534	0			19.8	-0.0039514	-0.00820892	-0.014761	-0.025736	0.0107272	0
20	-0.0105196	-0.0594746	0.0392264	0.0125225	0.0363109	0.00470624	-0.0197843	-0.0735445	0.0608001	-0.00817209	0			20	0.0127298	0.0250799	-0.00509689	-0.00782701	-0.000880154	0
20.2	0.0169614	-0.0258669	0.0111077	0.00424945	0.0118316	-0.0070182	-0.0255329	0.0113266	-0.0200029	0.0211986	0
20.4	0.0302074	0.00727814	-0.0369466	0.0229243	-0.0522909	-0.0374244	-0.0216563	0.0396178	-0.0266679	-0.0233701	0
20.6	0.0120053	0.0104558	-0.00451114	0.00118608	-0.0483222	-0.0132501	-0.0312254	0.029729	-0.00153371	-0.0375412	0
20.8	-0.00813635	0.0054563	0.00681543	-0.0346319	-0.0371217	0.0218481	0.011632	0.0249856	-0.00989905	-0.00523056	0
21	-0.0158974	-0.0182022	-0.0326321	-0.0328562	-0.0496624	-0.00201661	0.0527126	-0.0200084	-0.0133373	-0.0174162	0
21.2	-0.00043723	-0.0276902	0.00964197	-0.0003869	0.00489447	-0.0137219	-0.0180042	-0.0278098	-0.000584675	-0.0205775	0
21.4	0.00420598	-0.0568456	0.00608179	-0.00985322	-0.0299514	-0.00463176	-0.0226118	-0.0210473	-0.00671813	0.0169369	0
21.6	0.0102147	0.0021217	-0.0130068	-0.0311616	-0.0378515	0.00362525	0.0026541	0.0343233	-0.0441378	-0.00860612	0
21.8	0.0236392	0.0424261	0.0244444	-0.0188886	-0.0297041	0.0538216	0.0125453	0.0446872	-0.0148428	0.00209464	0
22	0.00989532	-0.0197918	0.0388846	-0.0110861	-0.0255377	0.0495121	-0.0223607	-0.0144605	0.0072525	0.0269049	0
22.2	-0.018504	-0.0697376	0.015895	-0.0241124	-0.0107682	-0.0229573	-0.0482564	-0.0721044	-0.0119068	0.0059374	0
22.4	-0.014287	-0.0209697	0.00810311	-0.00695821	0.00387268	-0.0228411	-0.000350273	-0.0451071	-0.000930074	-0.011145	0
22.6	0.0129239	0.0262243	-0.0266135	0.0377623	0.00286284	0.0333632	0.0395144	0.0598307	0.017745	0.00332167	0
22.8	0.0467677	0.0830366	0.0171714	0.0379703	0.00317406	0.00491891	0.00843789	0.0397182	0.0760192	0.0297649	0
23	0.0192932	0.0607598	0.0260181	0.0423059	0.0373029	0.0655649	0.0658024	-0.0506826	-0.0312963	0.0291722	0
23.2	0.0244081	0.0276496	0.0107822	0.00763881	0.00189719	0.0624244	0.0581525	-0.0220264	-0.0250445	0.011689	0
23.4	0.0323088	0.0365237	-0.0092065	-0.0171516	-0.0164224	-0.000530957	0.00244613	0.0171891	0.0247085	-0.0208456	0
23.6	-0.00560199	0.0102438	-0.0185146	0.00380058	0.0339877	-0.0238813	-0.0159206	-0.0392219	-0.0446054	-0.025792	0
23.8	-0.00666467	-0.045137	0.00384179	0.0132454	0.034908	-0.0568999	-0.0472995	-0.0330474	-0.0140239	0.0299237	0
24	-0.00207297	0.021655	-0.00443616	0.0438204	0.0480071	-0.0249301	0.0180017	0.032762	0.051862	0.0304782	0
24.2	-0.0338762	0.0332424	0.0536479	-0.0039795	-0.00968714	-0.00930506	0.0316214	0.00708069	-0.0280647	-0.0183561	0
24.4	0.0277652	0.0254817	0.0122802	0.0124012	0.0194629	0.00523827	-0.0232624	0.0379496	0.0166031	-0.01362	0
24.6	0.0392278	0.000826629	-0.0160907	0.0337696	0.0220733	0.00241227	-0.0265721	0.0155546	0.0495409	0.0168922	0
24.8	0.000894685	-0.0188885	0.00655862	0.00160836	-0.0284698	0.00793177	0.0391629	0.00307424	0.0172237	0.00501536	0
25	0.0218833	0.00857316	-0.00580043	-0.012684	-0.0180417	0.0355988	0.0606023	0.0717589	0.0518568	-0.0157754	0
25.2	0.00304849	0.0342667	0.0258957	0.00894284	-0.0106798	0.0283214	0.0294196	0.000505208	0.0350031	0.00683713	0
25.4	0.0211107	0.0427862	0.0422692	0.0512195	0.000401975	0.0467967	0.0652848	0.0186236	-0.0147274	0.0101145	0
25.6	-0.0101913	0.0133968	0.0263657	0.00908337	0.0126494	0.0194616	-0.0611748	0.0416045	-0.0316318	0.0118138	0
25.8	-0.0522851	-0.0285791	-0.0321667	0.0102996	0.0164222	-0.0281866	-0.0576952	0.0177919	-0.0309392	0.00452454	0
26	-0.0494861	-0.00606869	-0.0455799	-0.0158341	-0.00173376	-0.0266596	0.0214785	-0.0628588	-0.00573177	-0.0136311	0
26.2	-0.0559097	-0.0121561	-0.00517557	-0.0960463	-0.00966038	-0.0316533	-0.0213316	-0.0789861	0.0182876	-0.0163637	0
26.4	-0.0715016	-0.100786	-0.0163257	-0.0916378	-0.00491289	-0.0752063	-0.058286	-0.0083013	-0.0118277	0.0105831	0
26.6	0.00120693	-0.0541586	-0.0609091	-0.0576653	-0.0428477	-0.047273	-0.0312001	-0.067872	-0.0434956	0.0292438	0
26.8	-0.0191285	-0.0414777	-0.0481513	-0.0131065	-0.00130294	-0.0827693	-0.0598918	-0.0110964	-0.0230169	-0.00965601	0
27	-0.0232287	-0.0267435	-0.0177134	0.00860102	0.00173358	-0.0265356	-0.0218667	-0.0107047	-0.0290868	-0.0165898	0
27.2	-0.0125785	-0.015381	-0.0336587	-0.052618	-0.00249781	-0.0111773	-0.0229955	-0.00329668	-0.00879436	0.00010942	0
27.4	-0.0158393	-0.00771316	-0.0341208	-0.0292968	0.0124359	-0.0111215	0.00989245	0.0211109	0.0333544	-0.0205936	0
27.6	-0.0102207	0.00249701	-0.0158943	0.0543288	0.00807496	0.0385744	0.0605412	0.00513015	0.0155565	-0.043441	0
27.8	0.0213029	-0.00338546	-0.0251617	-0.00206435	-0.00276178	0.0143872	-0.0585702	0.0159652	-0.0397861	-0.00554359	0
28	0.0826452	0.0265618	0.0715557	0.0846689	-0.0123455	0.0352731	-0.0364434	-0.00272463	-0.0461201	0.011519	0
28.2	0.0292091	0.0604027	0.0449505	0.0522253	-0.0138576	0.0211294	-0.00597362	-0.0329016	-0.0173034	-0.0298842	0
28.4	-0.00354798	0.0377703	4.2818e-05	-0.019774	-0.0110513	0.0169627	0.0248832	0.0237144	0.0196151	-0.01667	0
28.6	0.00785992	0.0107284	0.00262069	0.0153047	-0.0187582	0.0254016	0.0539413	0.00891342	-0.00420908	0.0211114	0
28.8	-0.0126601	-0.0094379	0.0121858	0.0324488	-0.0309035	0.000801984	0.0302299	-0.0465569	-0.0103586	0.0136739	0
29	-0.0349657	-0.0276808	0.0123306	-0.0243789	-0.0260769	-0.0395169	-0.0316166	-0.00288855	0.0347861	-0.00516354	0
29.2	-0.0128408	0.00685046	0.00262806	0.0221763	-0.0042838	-0.041488	-0.0341417	0.0137989	-0.0095809	0.00279378	0
29.4	-0.0385364	-0.0252705	-0.000310633	0.0115566	0.0196357	-0.0152957	0.0429156	0.0723341	0.0272126	0.000538581	0
29.6	-0.00995148	-0.0664508	0.00212763	0.0360571	0.0396759	0.0345453	0.0261939	0.0173305	0.0465366	-0.0251608	0
29.8	0.00971429	-0.0127605	-0.0147751	0.053622	0.0280246	0.0215461	-0.0025651	0.000417341	0.0127198	0.0138953	0
30	0.00125471	0.0631472	-0.0190295	-8.50311e-05	0.00953925	-0.00228323	0.0065061	0.0155598	-0.0208461	0.0230957	0
30.2	0.00657533	0.0187184	0.00381052	-0.0628015	-0.00138787	0.0104986	-0.00892731	-0.0261081	-0.0126213	-0.0266529	0
30.4	0.0162223	-0.0690982	0.023634	-0.0461819	-0.00890502	0.00693006	-0.00655544	-0.0416528	0.00349939	-0.0112677	0
30.6	0.0215233	-0.00482722	0.0337065	-0.00364782	0.0224269	0.00861291	0.0737463	-0.0146681	-0.0299766	0.00689561	0
30.8	0.00737292	-0.00379699	-0.0237139	-0.0605664	0.0149247	-0.0146485	-0.0141257	-0.018586	-0.0231663	0.0132986	0
31	0.0114132	0.0228164	-0.0164028	-0.0220913	0.00522725	0.0127352	-0.0236533	0.00566143	-0.0264766	-0.000261946	0
31.2	0.0124083	0.0404204	0.0136479	-0.00724928	-0.0190054	0.00858227	-0.0329996	0.00959751	-0.040157	-0.00886859	0
31.4	0.0123667	0.0230466	0.0279559	-0.033958	-0.0213813	0.000853846	-0.0644937	-0.00403236	0.00185297	0.00380835	0
31.6	-0.00463523	0.0247608	0.023841	-0.00217109	0.0130862	0.00555536	-0.0483324	0.0019017	0.0560354	0.00844081	0
31.8	-0.0467855	0.0133544	-0.0190683	0.0170679	0.00913071	-0.0575633	-0.0485314	-0.0141152	0.0305265	-0.00390276	0
32	0.0137478	-0.0384476	0.0135518	0.0456852	0.00668142	-0.000316061	0.0488389	-0.0183383	0.0317941	0.0169118	0
32.2	-0.000120872	-0.011306	0.0115787	-0.00991424	0.0139173	0.00103105	0.00515319	0.000807954	0.0351104	-0.0148878	0
32.4	0.0268196	0.0639528	0.00708368	0.00784956	0.0393267	0.00906136	0.0309633	0.0219769	-0.0212825	-0.0107155	0
32.6	0.0415395	0.0432421	0.0244836	0.0703899	0.0504022	0.0124909	0.0436325	0.0315143	-0.0359244	-0.00155185	0
32.8	0.00789986	-0.00698563	0.00981585	0.0652963	0.0180445	0.00343656	0.0012861	0.0532488	0.00547332	-0.0174205	0
33	0.00664417	0.0298207	-0.0370572	0.0118137	-0.0368427	0.0193003	0.0171567	0.0604237	0.0107324	-0.00431282	0
33.2	-0.0123701	0.0225027	-0.0379949	-0.034552	-0.052624	-0.00289796	-0.0243531	-0.00365856	0.000189913	0.011772	0
33.4	0.00515841	-0.0146796	-0.0175051	-0.0129629	0.00846435	0.00258886	0.0375316	0.00667578	-0.0477992	0.0182071	0
33.6	0.0064217	-0.0612325	0.0061581	0.0277029	-0.0436745	0.0100975	0.0354094	0.0548881	0.0075691	-0.000173382	0
33.8	0.0256557	-0.0191153	0.0214376	-0.0269174	-0.0307628	0.00762285	0.0167435	0.00334751	0.0552453	-0.00548607	0
34	0.0341956	0.0127452	0.0164625	-0.0414884	0.022386	0.0191033	0.0328066	-0.0587913	0.0111462	-0.0262638	0
34.2	0.00438782	-0.0427257	-0.0204164	0.00103018	-0.0219199	0.0237488	0.0220961	-0.0471401	-0.0350566	-0.0421259	0
34.4	-0.0179504	-0.060182	-0.0402237	-0.0397247	-0.0508418	-0.00239636	-0.0235305	-0.048695	-0.0200641	0.00364304	0
34.6	-0.0416314	-0.0293223	0.0262749	0.00846088	-0.00638659	-0.000771179	-0.0340948	-0.0376045	-0.0024676	0.0140577	0
34.8	-0.0117729	-0.0126924	0.00955737	-0.0258898	0.00918878	-0.0108652	0.0111168	-0.0106764	0.0113844	0.0348763	0
35	0.0232207	0.0151635	0.0211006	-0.0233367	-0.0149076	0.00507677	-0.00066775	0.00593247	0.00812838	-0.00311149	0
35.2	0.000886793	0.0289198	0.0189123	-0.00414111	0.0282351	0.0499	0.0079088	0.030492	0.00581528	-0.00902694	0
35.4	-0.0175847	0.02275	0.0107028	0.025334	0.0672232	0.0516682	0.018103	0.0376429	0.035991	0.021608	0
35.6	0.0130906	0.0221758	0.0392917	0.0475489	0.0405591	0.0160914	-0.0124392	0.0081621	0.0507134	0.00919088	0
35.8	0.0111621	0.0335445	0.0100373	-0.0208996	0.0627805	0.00307558	0.00139393	-0.0076189	0.00475138	0.00959996	0
36	-0.0190197	0.0648531	-0.0132124	0.0171151	0.0171433	-0.0693101	-0.0628869	-0.0294765	0.0092696	0.0281582	0
36.2	-0.0391432	-0.0334086	-0.0482388	-0.0152219	-0.0271422	-0.0191055	0.00977215	-0.0363771	-0.0693892	0.0294598	0
36.4	-0.000340821	-0.0225678	-0.0354138	-0.017717	-0.0262776	-0.0223588	0.0197716	0.0317426	-0.0271051	0.0184971	0
36.6	0.0230854	-0.00273428	-0.000481285	0.0376148	-0.0219879	-0.0625993	-0.0293936	0.0435361	0.0370018	-0.00789774	0
36.8	-0.00978796	-0.030168	0.0120327	0.0362942	-0.0251645	-0.0246977	-0.019711	-0.0124453	-0.0098909	-0.027962	0
37	-0.0193683	0.0314895	0.012866	-0.0234061	-0.0089718	0.0121349	0.000877505	-0.000755281	-0.0355155	-0.00945245	0
37.2	0.00754688	0.0123344	0.00325276	-0.0295128	-0.000469504	-0.0132648	0.0143909	-0.00354523	-0.028535	0.00299537	0
37.4	-0.0169026	-0.0126001	0.0217293	0.0106879	-0.0145853	-0.0241805	0.000844994	-0.0545633	-0.04431	-0.0371907	0
37.6	0.00151354	-0.0446955	-0.0178794	0.0354204	-0.0204825	-0.00587365	0.00914878	-0.0186484	-0.0126978	-0.0302444	0
37.8	-0.0223489	-0.030803	-0.0391602	0.0132668	-0.0293441	-0.00433542	-0.00040597	0.0258445	0.0141246	-0.015087	0
38	-0.029286	-0.0073735	-0.00612085	-0.0263838	-0.0217335	-0.00394216	-0.0500555	-0.00274227	0.0113339	-0.0114134	0
38.2	-0.00436208	0.00229602	0.00594556	-0.0227192	-0.0048753	-0.00399108	-0.0590402	-0.0283246	0.0228375	-0.00691584	0
38.4	-0.0563463	0.0404255	-0.0172239	0.0146526	-0.0136192	-0.0214972	0.0230987	0.00927376	0.0349958	-0.027962	0
38.6	0.00384872	0.0172579	-0.0165796	-0.00543568	0.00556491	0.0258205	0.0713237	0.0219709	0.0140796	-0.0287789	0
38.8	0.0165389	0.000748952	-0.0270798	-0.00218589	-0.0160442	0.0252357	-0.00969389	-0.00996181	0.0231048	0.0111382	0
39	0.0152873	-0.0284145	-0.00949023	0.0205807	-0.0146056	-0.0190182	-0.0377683	0.0180672	-0.0424495	0.0222455	0
39.2	0.0285164	-0.0541869	-0.00522425	-0.0420449	-0.000221122	0.017864	0.00385165	0.0360833	-0.0324965	0.0099424	0
39.4	0.0122095	-0.0372022	-0.0153887	-0.0850606	0.012285	0.0184569	0.014486	0.0344226	0.0306255	0.0260556	0
39.6	-0.00419866	0.00237847	-0.00904584	-0.0159782	0.0406688	-0.0633483	-0.000512325	0.0320023	-0.0127242	0.0540314	0
39.8	0.020964	0.0131955	-0.0124235	-0.00225084	0.0359261	0.00477736	-0.00173894	-0.0273438	-0.0341206	0.0314972	0
40	-0.0362387	-0.00292799	0.0378318	0.0231683	-0.0142016	0.000435813	-0.0511268	0.0445866	-0.00841061	-0.0139314	0
40.2	-0.00211057	-0.0100752	0.0547696	0.0552398	0.0280763	0.0115567	-0.0485592	-0.00903	0.0164908	-0.00334764	0
40.4	0.015625	0.0230507	0.0378797	0.0351482	0.0186391	0.00033813	0.0102354	-0.0581005	-0.0278391	0.00777891	0
40.6	-0.0180559	0.0360902	0.0192984	-0.00774849	-0.00816017	-0.0271461	0.00458703	-0.0137167	-0.00964155	0.0152235	0
40.8	-0.0148814	0.0213305	0.0247429	0.00312794	0.00276077	-0.00464003	-0.0462287	-0.000350441	0.0723277	0.0199327	0
41	0.0177709	0.0308625	0.0317089	0.0322	-0.0166654	0.0455783	-0.0137501	-0.0453427	0.0540973	-0.00690087	0
41.2	0.0313264	0.0274316	-0.0207564	-0.0131441	0.0142882	0.0557278	0.0563324	-0.0297684	0.0184269	-0.0105204	0
41.4	0.0471882	0.0451005	-0.0130597	0.00478413	0.0309486	0.0235321	0.0964909	0.0109434	0.00470381	-0.0033326	0
41.6	0.0275013	0.00893729	0.0279129	0.0280882	0.049335	0.00465067	0.0154216	0.0467322	0.00749988	-0.0217422	0
41.8	-0.0109027	-0.0185117	0.0105588	-0.0216744	0.0341007	-0.00958733	0.00992449	0.0523336	0.0259293	-0.0048064	0
42	-0.002415	-0.0136087	-0.0228323	-0.0376286	0.0121769	-0.0136407	0.0283668	0.00695217	-0.00275181	-0.0103441	0
42.2	0.0251246	-0.00506585	0.0113575	0.034792	0.0353637	0.0258109	-0.00916526	0.00385764	-0.0479063	-0.0319507	0
42.4	-0.00725424	0.0187185	0.040231	0.0468627	0.0464997	0.0581661	0.0415683	0.0715604	-0.00623107	0.0421729	0
42.6	-0.0229176	0.00355251	-0.0379024	-0.00957675	0.0043643	-0.00669524	0.00549289	-0.0207637	0.00357533	0.0408264	0
42.8	-0.00158968	-0.0153777	-0.0402343	0.0166372	0.0205581	-0.0134491	0.0218704	0.0180185	0.0188232	0.0575392	0
43	0.000537855	0.00537399	-0.011273	0.022356	0.00723852	-0.00595073	0.0326478	-0.0262503	-0.0451031	0.00488193	0
43.2	0.00294159	0.0121986	-0.0124226	0.00353244	-0.0362674	-0.032098	-0.0137873	-0.0437261	-0.0364576	-0.0138221	0
43.4	0.015036	-0.0102976	-0.0245275	-0.0163622	-0.0496617	-0.0283024	-0.0396465	-0.0132676	0.0110712	0.00545113	0
43.6	0.00473336	-0.00684768	-0.0177756	-0.0213346	-0.0520375	-0.00231653	-0.0297327	-0.0716266	-0.0322453	-0.0275575	0
43.8	-0.00975014	0.0024774	0.00529759	0.0498253	-0.0658095	-0.0449655	-0.0616412	-0.0155303	0.0210305	-0.00866773	0
44	-0.0214127	-0.0475272	-0.00614158	0.0162476	-0.0545166	-0.0302202	-0.0339799	0.0316089	0.0471206	-0.0486275	0
44.2	-0.0576923	-0.0596795	-0.0443563	-0.0816655	-0.0839081	-0.0233322	-0.0299499	0.00410348	-0.00986628	-0.0393846	0
44.4	-0.0436295	-0.0494899	-0.0372844	-0.0629154	-0.0513273	-0.0303306	-0.0573614	-0.00477019	-0.0598424	0.0138246	0
44.6	-0.00788034	-0.0153427	0.00544353	-0.0251518	0.00850904	-0.00468359	0.000650362	0.0136933	-0.063226	0.0138739	0
44.8	-0.0010244	0.0303088	0.0287555	-0.0400073	0.0108726	0.0191654	0.0676835	-0.00910024	-0.0316035	-0.0149967	0
45	0.0121135	0.00634079	0.0348784	-0.00635322	0.0170633	-0.00949704	0.000478973	-0.0292889	0.0264461	-0.000369146	0
45.2	0.0129919	-0.0417129	0.0420697	-0.0192538	0.0393558	-0.0157976	-0.00537462	0.0470345	0.0603226	-0.0140013	0
45.4	-0.00520554	0.0515156	0.0222401	-0.0172335	-2.34514e-05	0.0229058	0.0440288	0.0709883	0.0500986	-0.0170254	0
45.6	0.0117444	0.0390252	0.000502191	0.0111656	0.015258	0.026175	0.0390469	0.0432304	-0.0252548	0.0160871	0
45.8	0.019148	-0.035677	0.00392075	0.0463312	0.0291042	0.000433755	-0.0286019	-0.0066708	-0.0229852	0.0390241	0
46	0.0128964	0.00696753	-0.00391483	0.0582905	0.0144223	0.0237562	-0.0121274	-0.0325935	0.0410412	0.0267294	0
46.2	0.0174083	0.0536929	-0.0188912	0.020259	0.0256157	0.051909	0.0558406	-0.0281331	0.0272456	-0.00307331	0
46.4	-0.00094118	-0.0258605	0.0176843	-0.0387011	0.0266499	-0.00430991	0.00571434	-0.0366197	-0.00923491	-0.0279762	0
46.6	-0.00133613	0.0418644	0.0289169	-0.0268403	0.0145116	-0.00480398	0.0537268	3.05968e-05	0.0223555	-0.0192862	0
46.8	0.0219037	0.0369351	-0.00150649	0.0393892	0.0379437	-0.0161928	0.0537461	0.046429	-0.0335972	-0.0191267	0
47	0.0166474	0.02218	0.00468491	0.0340372	0.0152333	0.015511	-0.00264456	-0.0184521	-0.0276714	-0.0136622	0
47.2	0.0218345	-0.00188212	0.0367817	-0.00107731	0.0129253	0.0626636	-0.0524235	-0.0304025	0.000772695	-0.00722014	0
47.4	0.0356996	-0.0204163	0.0185345	0.0107622	0.0233652	0.0519368	-0.0621868	0.0533007	-0.0104661	-0.0229442	0
47.6	-0.00602587	0.0139089	-0.0338561	0.0216965	-0.020749	-1.21517e-05	-0.0184504	0.0173961	0.0083496	-0.032038	0
47.8	-0.0476738	-0.0145019	-0.0269376	-4.3469e-05	-0.011503	-0.0343953	0.0432891	-0.0767496	0.01925	0.00229025	0
48	-0.016771	-0.0151404	-0.00493253	0.00884732	-0.0505542	-0.0147335	0.0286311	0.0454507	0.0499766	0.0044993	0
48.2	-0.0267367	-0.0106482	-0.0309981	-0.00767238	-0.0368213	0.0185877	-0.0266949	0.0859192	0.0208445	0.0163454	0
48.4	-0.010193	-0.0185406	-0.0075909	0.00425862	-0.0236822	0.0608191	-0.00820029	0.00999394	0.00149586	0.00187702	0
48.6	0.0156124	-0.0149307	0.0205779	0.0198179	-0.0258315	0.0525711	0.047285	-0.0280443	-0.0155437	0.000891165	0
48.8	-0.0134465	-0.0205402	0.0126646	-0.00772001	0.0132951	-0.0213715	0.0251985	-0.0148996	-0.0247717	0.0236618	0
49	-0.0223257	-0.0291186	0.019697	-0.0104628	0.044663	-0.0536354	-0.024365	-0.00739813	0.0317127	0.00683558	0
49.2	0.0193246	0.0493533	-0.0467997	0.0248083	0.0094148	-0.0155213	0.0327376	0.0333021	0.0193269	0.0199377	0
49.4	0.0303322	0.0143496	0.0219099	0.0193609	0.0399781	-0.014515	0.0375321	0.0278674	0.00392114	-0.0137033	0
49.6	-0.00357046	-0.0375174	0.0128694	-0.00275367	0.0234504	-0.0115684	0.00124141	-0.0351341	-0.00243059	0.0035192	0
49.8	0.000420856	-0.0312741	-0.00557737	-0.00336832	-0.00260976	0.0063587	0.00854197	0.00286621	-0.0154776	0.0138359	0
50	0.0202918	0.0203232	0.0164066	0.00664408	0.00939176	-0.0102091	0.0110277	0.0415457	-0.0177359	-0.00910882	0
50.2	-0.00417169	0.0378033	0.00662796	0.00215371	0.0136396	-0.0512084	-0.0116336	-0.0255468	-0.020955	-0.0028314	0
50.4	-0.0138777	-0.0146895	0.02423	-0.0111052	0.0147872	-0.0411531	-0.00745378	-0.0101213	-0.0542435	0.000153523	0
50.6	-0.00644033	0.0548502	-0.0287482	-0.0118175	0.00673044	6.85238e-05	-0.114765	-0.0342339	-0.0238076	0.000750243	0
50.8	-0.00367298	0.0268772	-0.0258768	-0.00192464	0.0142622	0.005234	-0.0197457	0.00100677	0.0511295	0.0359898	0
51	0.0258788	0.023677	0.0442864	0.0302023	0.0175216	0.0285277	0.032262	-0.0242733	0.0330197	0.027588	0
51.2	0.0302965	0.0314108	0.0327956	0.0139844	0.0270537	0.00961445	-0.0226039	-0.0259711	-0.00021034	0.0154628	0
51.4	0.0058193	-0.00738653	-0.0385958	-0.0511177	0.00224262	-0.0385261	-0.0194364	0.0377585	0.0367256	0.0468572	0
51.6	0.0059553	0.0112325	-0.0261889	-0.0504846	-0.0528406	-0.00694468	0.0174501	0.0175924	0.0313077	0.0443721	0
51.8	-0.0141853	0.0343351	0.00144543	0.00749373	-0.00503658	0.0243102	-0.00215555	-0.0322441	-0.0390573	-0.0160836	0
52	-0.00164115	-0.0710456	0.00789935	-0.0170204	-0.00984538	0.0299365	-0.0310424	-0.0516361	0.0102644	-0.0298749	0
52.2	0.0114282	-0.0459159	-0.0180562	-0.018325	-0.0098537	0.0160711	0.026257	-0.0222488	-0.0272655	0.0275035	0
52.4	-0.0202396	-0.0261006	0.00512354	0.0159175	-0.00859065	-0.0320294	0.00931285	0.0237219	-0.00491521	-0.000884966	0
52.6	-0.0236339	-0.0406504	0.00125296	0.0116929	-0.0271068	-0.0338752	-0.0431202	-0.0215865	0.0376566	-0.0540047	0
52.8	-0.0159441	0.00476791	-0.0532617	-0.0142261	-0.0264673	0.0280759	-0.0139123	-0.0716835	-0.0419543	-0.0226728	0
53	-0.0632004	0.00687479	-0.0141065	-0.00011805	-0.00352716	0.0265729	-0.00881113	0.0264874	-0.0771541	-0.00232198	0
53.2	0.0100829	-0.0123923	0.0208919	0.00788491	-0.0120071	-0.0246943	-0.0238992	0.0268297	-0.0205379	0.00633577	0
53.4	-0.0194992	-0.0183764	0.00209503	0.0288807	0.013295	-0.0371635	0.00915079	0.0237017	0.0437108	-0.0299826	0
53.6	0.0309392	-0.000190063	-0.0155336	0.0104868	0.00474489	-0.0204219	0.0556757	-0.0324374	-0.0124169	-0.0202402	0
53.8	0.030352	-0.00725242	-0.0076329	0.0272987	0.00466999	0.0365042	0.0322372	0.000510417	-0.00382849	-0.0182603	0
54	-0.0258784	-0.00915759	0.0133726	0.0304823	0.00954607	0.0508172	-0.0342615	0.0798078	0.0566155	-0.0232618	0
54.2	0.0141189	0.0272075	0.00264312	-0.0543277	-0.0158625	-0.0160204	-0.0407788	0.0413303	0.00767254	0.0107828	0
54.4	-0.00477151	0.0222814	-0.0421797	-0.0632251	0.00769578	-0.0127783	0.0189792	0.016528	0.00149177	-0.00348083	0
54.6	0.0225971	0.00708939	0.0260698	-0.0123372	0.0154127	0.0117901	0.0496308	-0.0129016	0.0149187	-0.00650903	0
54.8	1.15653e-05	-0.0401114	0.0148283	-0.0104605	0.0415245	0.00637038	-0.00139493	-0.0286295	-0.0512017	-0.00588632	0
55	-0.0396078	0.0142588	-0.00276272	-0.016195	0.0085041	-0.00766793	-0.0232563	-0.0346267	-0.0540304	0.0111118	0
55.2	-0.0212334	0.037092	-0.00946215	0.0130767	-0.0339367	-0.0277874	0.00664029	-0.0434229	-0.00223089	0.0203993	0
55.4	-0.0113868	-0.0382852	0.00123708	0.0158099	-0.0211242	-0.0134807	-0.0280215	-0.0371396	-0.00766704	0.000283377	0
55.6	-0.0407033	-0.028869	0.0432749	-0.0117248	-0.00503971	0.0176197	-0.0798525	-0.0118696	-0.0170307	-0.0047903	0
55.8	0.0218344	0.00811733	-0.0317333	0.0342539	0.00702832	-0.0615293	0.0275902	-0.0100498	0.0271168	0.0282647	0
56	0.000236794	0.0107092	0.0107735	0.0103205	-0.0208419	-0.0114898	-0.0464395	-0.00373593	-0.0194903	0.0144435	0
56.2	-0.00261047	0.0307306	-0.0011877	-0.0195629	-0.0196337	-0.0096309	-0.0308461	-0.00390013	0.0249544	0.00193919	0
56.4	0.0014038	0.0088189	-0.025932	-0.0403327	-0.01259	-0.0385336	0.07314	0.0495655	0.0187182	0.00834145	0
56.6	0.0208757	-0.0118412	0.00194112	-0.0315768	-0.0134541	-0.00698518	0.0556197	0.0395971	-0.0157773	0.00248106	0
56.8	0.0576461	0.01794	0.0239516	0.0102692	-0.000331202	0.018562	-0.0123431	-0.0303078	0.0273985	-0.0145517	0
57	0.0266026	-0.00435468	0.0324342	0.0280489	0.00310412	-0.00438102	0.0166467	0.0361134	0.0100336	-0.016723	0
57.2	0.0214937	-0.0240061	0.011801	0.0485176	-0.0106554	0.0175394	-0.0449235	0.00107282	0.0258012	-0.0199229	0
57.4	0.00527776	0.0558698	-0.0327961	-0.0252952	-0.0164189	0.0102455	0.00601693	-0.0411207	-0.013492	-0.0161388	0
57.6	0.01226	0.0526656	0.00238648	-0.0440741	0.0204661	0.0105784	-0.0205982	-0.0169921	0.0462259	0.0132312	0
57.8	0.00401847	0.0128478	0.0137313	0.00378856	0.0111139	-0.0206376	-0.0183289	0.00790057	0.0699718	0.0269165	0
58	-0.0187777	-0.0122579	-0.0290045	0.0139733	-0.0317204	-0.0314669	0.0353933	-0.0436198	0.00253621	0.00828227	0
58.2	-0.0128583	-0.0179484	-0.0115631	-0.0338525	-0.00756025	0.00705415	-0.0223399	-0.0924318	0.0036326	-0.00897512	0
58.4	-0.0171968	0.0818027	0.0106176	-0.0844081	0.016528	-0.0607626	-0.0329608	-0.0162419	0.0100457	-0.00636509	0
58.6	0.0153556	-0.0221235	-0.0163928	-0.0502152	-0.00626821	-0.0467201	-0.0163958	0.00722699	-0.00703226	0.0316514	0
58.8	0.0269835	0.0238625	-0.0173727	0.0139541	-0.00297222	-0.0371341	0.0121677	-0.0255537	-0.0578313	-6.91587e-05	0
59	0.0332262	0.132083	-0.00108456	0.0227871	0.00269281	0.0124563	0.0438151	0.0188798	-0.0582729	-0.0117328	0
59.2	0.0254214	0.0924874	0.0433847	0.0141007	0.00403691	0.0719516	0.0333466	0.00963784	0.00916289	0.0125879	0
59.4	0.00981999	0.0419105	0.0793604	0.00235535	0.00598214	0.0758392	0.0334592	-0.0400821	0.0537745	0.00666962	0
59.6	0.0319519	0.11396	0.0538584	-0.0357942	-0.0109695	0.0690381	0.0900423	0.052853	0.0205727	0.00456618	0
59.8	0.0595344	0.102627	0.0723476	0.0117179	-0.0138527	0.066438	0.0621236	0.0565423	-0.0106169	0.0263909	0
60	0.120326	0.116467	0.0678101	0.0690153	-0.0173177	0.113685	0.119882	0.114074	0.0581364	-0.0279249	1
60.2	0.176374	0.132704	0.119511	0.045634	0.0406155	0.14213	0.174583	0.115152	0.133153	0.0422078	1
60.4	0.175461	0.141714	0.113737	0.0130497	0.0520294	0.129405	0.149362	0.10639	0.131994	0.130808	1
60.6	0.143435	0.172142	0.0575876	0.0112995	0.00290266	0.107369	0.120683	0.11654	0.111523	0.113183	1
60.8	0.130617	0.149695	0.050042	-0.0117848	0.000345883	0.100778	0.1243	0.0773922	0.121002	0.11522	1
61	0.11531	0.0308951	0.0334096	-0.0491947	0.0125847	0.105824	0.0895619	0.048388	0.116249	0.172414	1
61.2	0.0721069	0.0462512	0.0617754	-0.0456971	-0.0258486	0.0891187	0.0703187	0.0822193	0.110159	0.0892031	1
61.4	0.0775206	0.0693935	0.0290688	-0.0474837	-0.0294978	0.0568171	0.113912	0.0186371	0.0259086	0.0602145	1
61.6	0.068789	0.0270426	0.0291223	-0.0597427	-0.0248524	0.0647589	0.143789	0.0199701	-0.0150475	0.124654	1
61.8	0.0617846	-0.00200044	0.0575961	-0.0606422	-0.0407636	0.0601325	0.086433	0.0695266	0.0284595	0.0926553	1
62	0.0454458	-0.0129262	0.037771	-0.0439946	-0.0428795	0.0339332	0.0138859	0.0585463	0.0672051	0.0626925	1
62.2	-0.0202497	-0.0456314	-0.00160072	-0.0418057	-0.0306285	0.0369469	0.00865466	0.0395854	0.0794067	0.154342	1
62.4	-0.0301786	-0.0185985	-0.0152633	-0.070898	-0.0613573	0.0234515	0.0166593	0.0408583	0.0981228	0.0731625	1
62.6	-0.00991216	0.018276	-0.037901	-0.041691	-0.0944829	0.0295126	0.0706922	0.0199794	0.0188422	0.0710355	1
62.8	-0.00268655	0.010352	-0.0348199	-0.0591601	-0.0858021	-0.028816	0.0625853	0.0083723	0.00578604	0.0823885	1
63	-0.0252041	0.0704798	-0.0226376	-0.111574	-0.0612059	-0.00297278	0.0465366	-0.019616	-0.0195483	0.0708856	0
63.2	-0.030849	0.103526	0.000901287	-0.093952	-0.0589658	0.038612	0.057177	-0.0102521	0.0218555	0.0685264	0
63.4	-0.0314816	0.00530057	0.023056	-0.0477825	-0.0718089	0.00547369	0.0616529	0.0307824	0.0780487	0.05117	0
63.6	-0.0536528	-0.0502889	-0.00657382	-0.0690083	-0.0679458	0.0221909	0.0712149	-0.00298671	-0.0332221	0.00973858	0
63.8	0.00553219	-0.00942131	-0.0421938	-0.0450382	-0.0618618	-7.62337e-05	0.0784667	-0.00844065	0.0555131	0.0288913	0
64	-0.0242179	-0.062319	-0.0309396	-0.0293051	-0.107831	0.00598207	0.0534459	0.0758391	0.0504924	0.0406095	0
64.2	-0.0176769	-0.0416725	-0.0460982	-0.00800642	-0.0633661	0.0226537	0.0109316	0.0531588	0.0440477	0.00676204	0
64.4	-0.00500791	0.0191104	-0.0260296	-0.00986748	-0.0564158	0.0311324	0.0177234	-0.0400075	0.0605501	-0.0234799	0
64.6	-0.0118324	-0.00403541	-0.0117472	-0.00888079	-0.102062	0.0333774	0.0121414	-0.0213757	0.0128422	-0.0102009	0
64.8	0.011482	-0.0295724	-0.043609	-0.000548291	-0.0752975	0.0285544	-0.016783	0.0398177	-0.0258588	0.0158566	0
65	-0.00954941	0.0313662	0.00648993	-0.0582788	-0.0722399	0.022625	0.0347368	-0.0314433	0.0253434	0.0144965	0
65.2	-0.0585554	0.0293872	-0.0161079	-0.0521279	-0.0823802	0.0152916	-0.0421744	-0.0109412	-0.0172217	0.0111179	0
65.4	-0.055599	-0.00709245	-0.0196508	-0.0702175	-0.0712433	-0.00383172	-0.0270588	0.0373494	0.00155851	0.0158116	0
65.6	-0.0150249	-0.00206156	-0.00309403	-0.0369298	-0.0172298	-0.00296695	0.0313505	-0.00964206	-0.00628334	0.00934615	0
65.8	0.0138222	-0.0203326	-0.013613	0.0052094	0.000619604	-0.0118934	-0.0202547	-0.0603384	-0.035867	-0.00968127	0
66	0.00409632	-0.0398991	-0.0138582	-0.0171872	-0.0356036	-0.0154641	-0.035666	-0.0370515	-0.0395382	-0.0168533	0
66.2	-0.0267686	0.00261258	0.0135105	-0.0208121	-0.0389467	-0.00176731	0.092573	-0.011175	-0.0402136	-0.0182635	0
66.4	-0.0279956	-0.0336792	-0.0138757	0.0217587	-0.0187114	-0.0641654	0.0640411	-6.549e-05	0.00888573	-0.0398246	0
66.6	-0.0123469	-0.0281461	-0.0160522	-0.0137718	-0.0271252	-0.0252096	0.00299205	-0.00836779	-0.0392512	-0.00281906	0
66.8	-0.00805141	0.0296402	-0.00908482	-0.0339678	-0.0290943	0.025828	-0.0377732	-0.00342894	-0.0431371	0.0307331	0
67	-0.0267054	0.0479426	0.0184035	-0.00710048	-0.0192638	0.0166368	-0.0050456	0.00400557	-0.00617232	-0.0105224	0
67.2	-0.0234761	0.0106298	0.00827805	0.0148204	0.0159415	-0.0153712	0.0269314	0.00945439	-0.0145711	-0.0459665	0
67.4	0.0159274	-0.011985	-0.0112057	0.0168818	0.0396567	-0.00852897	-0.0249004	0.0221597	-0.0451793	-0.00576124	0
67.6	0.0328777	-0.00431943	0.0461373	0.0225414	0.00419223	0.0164136	-0.0746488	0.022567	-0.0137941	0.0175727	0
67.8	0.0215633	-0.00812742	-0.0156572	0.0242578	0.0212151	-0.0221196	-0.055942	0.000724312	0.0651206	-0.0184904	0
68	0.00250385	0.0765782	-0.0427535	0.0331605	0.00751353	0.0245357	0.00929792	0.0111859	0.0392331	0.00384499	0
68.2	0.00731191	0.0112298	0.020708	0.0398541	0.00973841	0.00263361	0.0165633	0.0444879	0.0423931	0.0349308	0
68.4	0.0205511	-0.0163717	0.0573873	0.0427808	0.0135157	0.0142363	-0.00357058	0.0236164	0.0328432	0.0122915	0
68.6	0.0111848	0.0168665	0.01709	0.0179798	-0.00827399	0.0438833	0.0381354	-0.00460235	-0.0221238	-0.0109666	0
68.8	0.00776539	-0.0337169	-0.00897858	-0.0211549	-0.00284115	-0.00792601	0.0664572	0.026987	-0.0139809	0.00956083	0
69	0.0405202	0.0437451	0.0197433	0.00379289	0.0262242	0.042614	-0.011874	0.024158	0.0233079	0.0130198	0
69.2	0.0176396	-0.0204539	0.00729998	0.0434067	-0.0239913	0.00196678	0.0364418	0.000746901	0.00613566	0.00384678	0
69.4	0.0257681	-0.0223739	0.00122775	0.036158	-0.00093041	0.0324939	0.0174629	-0.01609	0.0373792	0.020813	0
69.6	0.00611339	-0.0303318	0.00518214	-0.0300682	0.0389472	0.0397767	-0.0216548	-0.0176529	-0.00449982	0.0444209	0
69.8	-0.0172728	-0.0144009	0.017056	-0.0352587	0.0461644	-0.000557992	-0.0146356	-0.0243672	-0.0637987	0.0354403	0
70	-0.00346844	0.0416541	0.00956163	0.00791495	0.0413812	-0.0247219	-0.0133359	-0.0338136	-0.0147075	0.0167384	0
70.2	-0.0161389	4.38714e-06	-0.0324927	-0.0145396	0.0284174	-0.054874	-0.0188907	-0.0242456	0.0398543	0.00744167	0
70.4	-0.0433733	-0.0266937	-0.0328295	0.00588462	0.0340661	-0.054699	-0.00168149	-0.0212788	0.0119465	-0.0425094	0
70.6	-0.0610395	-0.00190787	-0.0488122	-0.0115789	0.00104815	-0.0337605	-0.0375205	-0.0233111	0.00629697	-0.034513	0
70.8	-0.0204504	-0.0259683	-0.002383	-0.0123775	0.00808246	-0.0136277	-0.00172442	0.0350835	0.0202531	-0.0129983	0
71	0.0221311	0.00993972	0.0257398	-0.0179399	-0.00436953	-0.0262115	0.0218013	0.0319708	-0.0178691	-0.0387745	0
71.2	0.0214302	0.0624455	-0.0105076	-0.0329845	-0.0307224	-0.0124725	0.0102994	0.00758953	-0.00610433	-0.0434334	0
71.4	-0.00326903	-0.012249	-0.0309646	-0.0118261	-0.0335329	0.0331851	0.00203203	0.0470979	0.0572164	-0.0134739	0
71.6	-0.0257163	-0.0652702	0.000407537	0.00823069	-0.0612593	0.0100162	-0.0436709	0.0241135	-0.0087774	-0.0396835	0
71.8	-0.00885075	0.0392555	0.0406441	-0.0260397	-0.0195096	0.00516255	0.0152393	-0.00956614	-0.0252167	-0.0149522	0
72	0.0184097	-0.0317148	-0.0272901	0.00606508	-0.0181837	0.0348648	0.0225146	-0.0170432	-0.0425838	0.0342493	0
72.2	0.0123767	-0.0470748	-0.0211675	0.0166842	-0.0256433	0.0300676	-0.00906509	-0.0237761	-0.0165127	0.0235514	0
72.4	0.0190765	0.033938	0.0101515	-0.0310624	0.0126943	0.01755	0.00609123	-0.0326341	0.0140216	0.0241624	0
72.6	0.0196478	0.0305334	-0.00811233	-0.0235574	0.026144	0.0209381	0.0281282	-0.0231849	0.00734815	0.0209157	0
72.8	-0.0177272	-0.0180063	-0.00797284	0.0257653	-0.018381	0.0139859	0.0133435	0.0148411	0.00901008	-0.0141882	0
73	-0.000904785	0.0138714	-0.0175022	-0.0309148	-0.00138178	0.00902184	0.0239937	0.0351337	0.0150927	0.0562218	0
73.2	-0.0101311	0.0200821	0.0402198	0.00132508	0.0364611	-0.0257525	-0.0133495	-0.0559084	-0.000686717	0.0199494	0
73.4	-0.00419023	0.0196597	0.0402962	0.0203524	0.0323571	0.00713732	0.014207	0.00578432	0.00458173	0.00692321	0
73.6	-0.000257242	-0.0183958	-0.0200299	0.00691131	-0.00543203	0.00744513	-0.0102524	0.0146657	-0.0419729	0.00125765	0
73.8	-0.00768735	-0.0169551	-0.035843	0.0065262	-0.0148895	-0.032679	-0.049977	-0.0082754	-0.0339716	-0.0109688	0
74	-0.009046	0.0392316	0.0159426	0.00753564	-0.0148387	-0.0367434	-0.0321554	0.0467737	0.0337664	0.00609716	0
74.2	0.00804104	0.0258888	0.0465479	0.00366922	-0.0416606	-0.0235326	-0.0361247	0.0290462	0.00743173	-0.000573965	0
74.4	0.0495712	-0.00403467	0.0126726	0.0278123	-0.0064831	0.00630156	0.0109876	0.0357838	0.0495553	-0.0510617	0
74.6	-0.000688039	-0.0330465	-0.00215482	-0.00322725	-0.0236519	0.0258575	0.0195046	0.016264	0.00919457	-0.0238147	0
74.8	-0.013129	0.0108131	0.0109227	0.00746427	0.0318992	0.0208069	0.0233263	-0.0298298	-0.0119808	-0.0131432	0
75	0.0215368	0.028527	-0.00119544	0.00226879	0.0246871	0.0120771	-0.00116549	-0.0339706	-0.0264324	-0.00658161	0
75.2	0.0283628	-0.00252722	-0.0269875	-0.0286267	-0.0453759	0.00525582	0.00506373	0.00726475	-0.0451951	0.0219785	0
75.4	0.0190832	-0.00106393	-0.0270638	-0.0182033	-0.0258226	-0.00297432	0.046136	0.00737451	-0.01708	0.0174011	0
75.6	0.0231972	-0.0132955	-0.00607186	-0.0156757	0.0112308	-0.00319153	-0.0179633	-0.0431385	0.00829902	-0.00859156	0
75.8	-0.00824262	-0.0599164	0.0443572	-0.01049	0.0670186	-0.0153299	-0.0225106	-0.0143737	0.0160372	0.015079	0
76	-0.046375	-0.0101993	-0.0108051	-0.0322075	0.0258193	-0.0083237	-0.00719071	-0.0280312	0.0377097	0.0271759	0
76.2	-0.0543523	-0.0222446	-0.0388205	-0.0368385	-0.0310246	-0.022125	-0.0152431	-1.69378e-06	0.00596484	-0.0109554	0
76.4	-0.0167061	-0.0470714	-0.0484598	-0.0527234	-0.0786153	-0.026599	-0.0306543	0.0086713	0.00651463	-0.0212616	0
76.6	0.0093219	-0.0178587	-0.059814	-0.0692587	-0.0997843	0.0117085	-0.03146	-0.0528961	0.0471375	-0.00293996	0
76.8	-0.0132449	-0.000233368	0.0167531	-0.0119076	-0.0339587	0.0367963	0.00453579	-0.0405996	0.012701	-0.0192835	0
77	-0.00358653	0.0652493	0.0769517	0.0545487	0.0420045	0.0112326	0.0549188	0.0431107	-0.00393099	-0.0158395	0
77.2	0.00182792	0.0314419	0.0139847	0.0394658	0.050229	-0.0121871	-0.0265352	0.00497167	0.0246825	-0.0313366	0
77.4	-0.0446101	0.0612026	-0.00663657	0.0192125	0.00797403	0.011591	0.00848537	0.00269425	-0.0477344	0.0253118	0
77.6	-0.0279118	0.0177444	0.000312542	0.0348364	-0.0066753	0.000602977	0.0134551	-0.003738	-0.086063	0.00601329	0
77.8	0.0262819	-0.00829726	-0.00340948	0.0506427	0.000381745	-0.0171925	-0.0617808	-0.00682985	-0.0328782	-0.0178587	0
78	0.046769	0.0500791	0.00507311	0.0223143	0.0128535	0.0220989	-0.0211141	0.0203751	-0.00254891	0.0475296	0
78.2	0.0575682	-0.0368384	0.00148146	-0.0310795	0.0383685	0.0349736	0.0761769	-0.00225036	-0.00644668	0.0331748	0
78.4	-0.0152949	-0.0710929	-0.0179995	-0.030646	-0.00976602	-0.0177185	-0.00757765	0.0186077	0.0116894	0.00661155	0
78.6	0.0185304	-0.0375748	-0.024105	-0.0112804	-0.0370057	-0.0230523	-0.022769	0.0121919	0.0122532	-0.00693056	0
78.8	-0.00303161	-0.0488515	-0.028189	-0.0498223	-0.0461424	-0.0172392	0.00585781	0.0185826	0.0117743	-0.0279462	0
79	-0.0174146	-0.0137384	0.0141888	-0.005973	-0.0251968	0.00150908	0.0240569	-0.0141128	0.0334079	-0.0190384	0
79.2	0.00375527	0.0550171	0.0387875	0.0532641	0.00851462	0.012272	0.0164397	-0.0361839	0.015307	0.023039	0
79.4	-0.021401	0.0455874	0.0193686	0.0100681	0.0252992	-0.00101683	0.00380168	0.0061912	-0.0236185	0.0247887	0
79.6	-0.00396168	0.0336021	0.0648606	0.0490345	0.0450082	0.0235271	0.0396297	-0.00445937	0.0233034	-0.0168125	0
79.8	-0.0339265	0.00373562	-0.013387	0.0224119	0.0158943	0.00983901	0.0150881	0.0494227	-0.00793363	0.0152342	0
80	-0.0413666	0.000907858	-0.00122055	-0.0181754	0.0325391	0.0264146	0.0114914	-0.00179537	0.038028	0.0237162	0
80.2	-0.00508865	0.00362105	-0.00770517	-0.0176535	0.0381662	0.0233851	0.00999731	-0.0139268	0.0214781	0.0189198	0
80.4	0.0245773	0.0401527	-0.0279165	-0.00826297	0.0122734	-0.003444	-0.0269221	0.0267405	-0.0200328	0.00191126	0
80.6	0.00531976	0.0368135	0.00461058	0.00397544	0.0154992	1.63943e-05	-0.00711696	0.014099	-0.008519	-0.00972542	0
80.8	-0.0135131	-0.0551901	-0.00718386	0.0287976	0.0358352	0.0107066	0.0506901	0.00698684	-0.0219932	0.00793628	0
81	0.0469372	-0.0185414	-0.0301728	0.00404947	0.00709268	-0.014892	-0.042556	0.0479399	0.00510556	-0.0149451	0
81.2	0.0456983	-0.0201032	0.0306522	-0.00600451	-0.00759355	-0.00179385	0.0466861	0.0320676	-0.0258136	0.0261767	0
81.4	0.0233287	0.0131276	0.0171724	0.0386827	-0.00205352	0.00410083	0.0116776	0.0138358	-0.0177972	-0.00571443	0
81.6	0.0304952	0.0320073	0.02199	0.0235965	0.019694	-0.00884075	-0.0112633	-0.00380688	0.0380843	-0.00250623	0
81.8	-0.000164241	-0.0125663	0.0216971	-0.0102042	0.0328154	-0.0247652	-0.0197149	-0.0266811	0.0500371	0.0393163	0
82	-0.0397766	-0.0436216	-0.0309855	-0.0032391	0.0103005	-0.0242651	-0.0549651	-0.00368589	0.0134591	0.0225245	0
82.2	0.00581301	-0.0247511	0.00662453	-0.0335753	-0.00838322	0.011876	0.0727973	0.0390077	0.010282	0.0194931	0
82.4	-0.0317597	-0.0142411	0.0079376	0.00867856	0.0285188	0.029737	-0.0139061	-0.0305411	0.014971	0.00361808	0
82.6	-0.0036957	0.0128815	0.0375132	0.00121361	0.00207951	-0.02786	-0.0295601	-0.0596569	-0.0252646	-0.0058309	0
82.8	0.0153377	0.0139135	0.017736	0.015118	0.00898233	-0.0326411	0.00426295	-0.0538855	0.0298296	0.0110312	0
83	-0.0259241	-0.0290768	-0.0441597	0.019334	0.0247682	-0.0198174	-0.0260973	-0.0431059	0.00479626	-0.0165397	0
83.2	-0.054612	-0.0292762	-0.0337587	-0.0272472	-0.00576465	-0.0306092	-0.0586774	-0.0338272	-0.0647646	-0.0548671	0
83.4	-0.0367505	0.00843299	0.0268417	-0.038003	-0.0429621	-0.0155969	-0.0164532	-0.0344725	0.00300439	-0.0274035	0
83.6	-0.0283453	-0.0355526	0.00309157	0.00923954	-0.0794349	-0.0218796	0.0161652	-0.0173654	-0.0232788	-0.0139468	0
83.8	-0.0341651	0.00826103	-0.0034809	0.0230292	-0.0676634	-0.0405738	-0.0300826	0.0246605	-0.0288618	0.00509674	0
84	0.0103207	-0.0139494	-0.0270219	0.0360432	-0.00394695	-0.00778918	-0.0183913	0.0352951	-0.0948955	-0.0251146	0
84.2	0.0234783	0.0296655	-0.00852191	0.0215893	0.00388719	0.00488529	-0.0347018	0.00791263	-0.0749628	-0.0586423	0
84.4	0.0306712	0.071372	0.00698401	0.0223108	0.00475353	0.00141351	-0.0386278	0.00839461	0.0403477	-0.0178931	0
84.6	0.037582	0.0128915	-0.0110435	0.0316139	0.0415792	0.0176771	0.0433891	0.0251718	0.0779787	0.0327634	0
84.8	-0.00333988	-0.00640422	0.0194078	-0.00346215	0.0239007	0.0248278	0.0682329	0.0203677	0.0384009	0.0202467	0
85	0.0451766	-0.0135853	0.0496416	0.0238063	0.00835765	0.0492921	-0.0166905	0.0722182	0.0685603	0.0541288	0
85.2	0.0233123	0.0533819	0.0677136	-0.0168692	0.0530342	0.0614941	-0.00674514	0.0289832	0.0702273	0.0270713	0
85.4	0.0185383	0.0687659	0.0266855	-0.00872696	0.0437122	0.0839598	0.0835974	0.00665746	0.0510002	-0.0294347	0
85.6	0.0429282	-0.00794374	-0.00377715	-9.93951e-05	0.0179255	0.0523794	0.0892927	0.000686838	-0.00508017	-0.0221034	0
85.8	0.021399	-0.0371317	-0.00904622	-0.0421461	0.0080211	-0.0168041	0.00535357	-0.00677006	-0.0192655	0.0030863	0
86	-0.0245812	0.0171751	-0.0129879	-0.0501985	-0.0118508	-0.0246543	-0.0170266	0.0160747	0.0423025	-0.00898352	0
86.2	-0.0236566	0.00863474	0.0240477	-0.0107563	0.00166633	0.00486586	0.0353064	0.00893494	0.0269836	0.00953615	0
86.4	-0.0208667	-0.0216124	0.0121989	-0.00453919	0.0153839	-0.0227513	-0.0013617	-0.0328101	-0.0298989	0.0216501	0
86.6	-0.0134057	-0.0285843	-0.0747122	0.00129536	-0.0649535	-0.0573862	-0.0207515	0.0131687	-0.0202303	-0.00445167	0
86.8	-0.0142218	-0.0107274	-0.0666959	-0.00987304	-0.0658687	-0.0600726	-0.0296534	4.87978e-05	-0.0398851	0.0021762	0
87	-0.0399422	-0.00667723	-0.0375676	-0.0136974	-0.017708	-0.0301393	-0.0198218	-0.0610421	-0.0640115	-0.00337012	0
87.2	-0.0434078	-0.0363289	-0.0410036	-0.00275551	-0.0172694	-0.0420837	-0.0131993	-0.0546786	-0.0521141	-0.0265777	0
87.4	-0.0184892	-0.0586404	-0.00358116	0.00768982	-0.0186785	-0.0686911	-0.045503	-0.016618	-0.059285	-0.000754734	0
87.6	-0.0396767	-0.0254972	-0.0127746	0.0417729	-0.0268668	0.0346889	-0.0402376	-0.0119005	-0.0518627	0.011876	0
87.8	0.0224343	0.0189476	0.0146965	0.00727396	-0.0280116	0.0101047	-0.0307245	0.00740008	-0.00939137	0.0122006	0
88	0.0369022	0.00794245	-0.00296491	-0.0355767	-0.00632327	-0.00895527	0.031958	0.00846438	0.0077663	-0.0362937	0
88.2	-0.00943914	-0.0304277	-0.0010754	-0.0358069	-0.000252544	0.0123768	-0.0234297	0.0260848	0.00925597	-0.0416162	0
88.4	-0.0147207	-0.036994	0.0425028	-0.0474124	-0.00517236	0.0349543	-0.0525711	0.0354962	-0.0048641	-0.0213098	0
88.6	0.0136212	0.00630752	0.0441623	-0.0564924	-0.00152122	0.0367753	0.0360925	-0.00340387	-0.00628889	-0.0134541	0
88.8	-0.0136443	0.0542807	0.0131868	0.0149533	-0.00901968	0.00869059	0.01267	-0.0214537	0.0491668	0.0190579	0
89	-0.047152	0.0365498	0.0241561	0.0524533	-0.0105423	0.00347894	0.0249815	0.0048937	0.0739328	-0.00758635	0
89.2	-0.0214121	0.00952883	-0.0432308	0.00373936	0.0121507	-0.0258627	-0.000932514	-0.0656574	0.0784027	0.0212569	0
89.4	0.00737423	0.0169637	-0.0456051	0.0111429	0.0238339	0.0153882	-0.0525948	-0.0402523	-0.0336224	0.00417906	0
89.6	0.0353364	-0.0080021	-0.00268468	0.019165	-0.00991619	0.00693136	-0.0170126	0.0298646	-0.0370193	0.0149307	0
89.8	0.0456621	-0.0122801	-0.0197488	0.0132955	-0.0200134	-0.0394038	0.0124355	0.0178051	0.0286274	0.0436313	0
90	0.0333912	0.0294941	-0.0475779	0.0334277	0.015981	-0.00630307	-0.0195194	-0.0167585	-0.0222157	-0.00210699	0
90.2	0.0591059	-0.0304743	-0.0198217	-0.00532659	-0.0109983	-0.00994846	0.0519543	-0.00700106	0.0120891	-0.0214644	0
90.4	0.0456897	-0.0461883	-0.0273023	-0.00486633	-0.0351475	-0.0144231	0.0175517	0.031106	0.0381519	-0.0293427	0
90.6	-0.0139038	0.00584297	0.0187166	-0.0395287	-0.0104989	0.0536687	-0.0492211	0.0761122	-0.0132289	0.0287354	0
90.8	-0.00273088	0.0520604	-0.000372452	-0.0278861	0.00926365	0.0476137	-0.0184308	0.0340521	-0.0200647	0.0172408	0
91	0.0128887	0.0398047	0.0334618	0.000493736	-0.00439134	0.0107939	0.0580515	-0.0251217	0.00218589	-0.0254151	0
91.2	-0.0164767	-0.00240852	0.0997062	0.0169264	0.00304629	0.00967565	0.0479001	-0.009954	-0.0102021	0.000971668	0
91.4	-0.0174178	-0.0121625	0.0126016	0.0493719	0.0440955	-0.0208493	-0.0184437	0.00529612	-0.0204648	0.0117147	0
91.6	-0.0333858	-0.000861147	0.00694422	0.00870606	0.0279646	-0.0101723	0.0123748	-0.0280369	-0.0158411	-0.0327999	0
91.8	-0.0118828	-0.0327154	0.00856948	0.0321713	0.00129805	0.0294893	0.0325902	0.00282648	0.0390174	0.0306689	0
92	-0.0134417	0.0269554	-0.0199993	-0.0117359	0.0222895	0.00300479	-0.0416169	0.0123917	0.00935447	0.0358193	0
92.2	0.00829821	0.0253847	0.0145943	-0.0179057	0.0474174	-0.0234279	-0.0149117	-0.0271414	-0.00194466	0.0129533	0
92.4	0.00312602	-0.0371262	0.0436812	0.00556121	0.030548	-0.0156868	0.0261506	-0.0277001	0.0419925	0.0143564	0
92.6	-0.0441652	-0.0441155	-0.00354724	-0.00746022	-0.00547694	-0.0156542	-0.00562499	0.0194423	0.0182437	0.00824481	0
92.8	-0.0138568	-0.0561985	-0.0234034	0.0118855	-0.0165496	-0.0222239	0.0552607	0.00977822	-0.0628054	0.00635238	0
93	-0.0066497	-0.0161081	-0.039341	-0.0620057	-0.00491377	-0.0266956	-0.00507328	-0.0348169	-0.059179	-0.0171871	0
93.2	0.0163348	0.00410897	-0.00187847	-0.0400481	-0.017341	0.0392725	0.00630204	-0.00569585	0.00167067	-0.0378002	0
93.4	0.048507	-0.00164002	0.00182252	-0.0136886	0.00108945	0.0446043	-0.00247518	-0.0196585	0.0200265	0.0209242	0
93.6	0.0501385	-0.0094307	0.0205451	-0.0247293	-0.00269961	0.0326954	0.0101425	0.00592654	-0.0367745	0.00721629	0
93.8	0.0317885	0.0310535	0.0209871	-0.00322123	-0.0209467	0.0345565	0.0362887	0.0583639	-0.0430849	-0.0493828	0
94	0.0230954	0.0835313	-0.0339748	0.0236921	-0.00380765	0.0134433	0.00250587	0.0201813	0.0384159	0.00351008	0
94.2	0.00571781	0.0353805	0.0145844	-0.00976748	-0.0270519	0.0443739	0.0276384	0.0142353	0.0209193	0.0160721	0
94.4	-0.0204999	0.0276633	0.00567882	0.0146611	-0.012312	0.03557	0.0174215	0.00518092	-0.029963	-0.0092625	0
94.6	-0.0036571	0.0118717	-0.0167801	0.0219489	0.0253701	0.0182125	-0.000116235	-0.0275169	0.00749481	-0.0155812	0
94.8	-0.00293532	-0.0252803	0.00223607	-0.0186656	0.0092663	6.58776e-05	0.00812625	-0.00511572	0.0384132	-0.00989933	0
95	-0.0342019	-0.0637731	-0.0109535	-0.0103631	-0.0556553	-0.0155613	0.0306776	0.00927457	-0.0326552	-0.0170049	0
95.2	-0.0337966	-0.0356737	-0.0679374	0.00802926	-0.0633346	-0.0317213	0.004586	-0.016265	-0.0377678	-0.0215161	0
95.4	-0.00115295	0.0250105	-0.0681423	-0.033134	0.00502452	-0.0485804	-0.0687422	-0.00197364	0.0864497	-0.0134518	0
95.6	-0.00618469	-0.0520482	-0.0158217	0.0402655	0.00293149	-0.0259571	-0.0598275	-0.0158558	0.0158104	-0.0166762	0
95.8	0.00643834	0.0464032	0.0466607	0.0332994	-0.0170321	-0.0138176	-0.037919	-0.029244	0.0330687	0.0261963	0
96	-0.0153055	0.0304633	0.0180705	0.00930191	-0.0122997	-0.0428423	-0.00421404	-0.0250193	-0.00216962	-0.00286445	0
96.2	-0.0229765	0.0011891	0.0108738	-0.00589146	-0.00205477	-0.054164	-0.00182792	0.0406322	-0.0217228	0.026073	0
96.4	0.00465617	0.0419635	0.0514516	0.00212487	0.00281077	-0.00776435	-0.0271982	0.0887426	-0.0102664	0.0578341	0
96.6	0.0405443	0.0254377	0.0495825	0.0304369	0.023257	0.0339929	-0.0178803	0.0482067	-0.0182582	-0.0118905	0
96.8	0.0683304	0.0125831	0.0304592	-0.00244072	0.039928	0.0203896	0.0201643	0.0163306	0.0483632	-0.00406797	0
97	0.0066909	0.016234	0.0190361	-0.0402775	-0.00834028	0.0340512	0.0324283	0.0114469	0.0303779	0.00575196	0
97.2	0.0409542	-0.00865281	0.0455609	0.0285459	0.00390275	0.0239388	0.0470579	0.0104731	-0.0387125	0.00536154	0
97.4	0.0374283	0.00584955	0.040033	0.0261319	0.0231312	0.0158955	0.0890403	0.0247491	-0.00121581	0.0252865	0
97.6	-0.00923407	0.00669462	0.00795044	0.00387168	-0.0238146	-0.00981036	0.0719512	-0.0105945	0.0185041	0.0214952	0
97.8	-0.0236288	-0.0195497	-0.0026215	0.0332989	-0.0280434	-0.0337006	-0.00809508	-0.0410756	-0.0108481	-0.0198766	0
98	-0.0334729	-0.0204064	-0.0235733	0.0112236	0.043158	-0.00823609	-0.0506024	-0.0248968	-0.0244887	-0.0367049	0
98.2	-0.0350191	-0.0457414	-0.0719493	-0.0343511	0.00301085	0.000236827	-0.0470213	-0.0942392	-0.12176	-0.0135521	0
98.4	-0.0393712	-0.00339742	-0.019484	-0.0362264	0.000226063	-3.74777e-05	-0.00967654	-0.013224	0.032853	0.00533601	0
98.6	0.00729246	-0.0185648	-0.0248204	-0.0310892	0.0039676	0.0160476	-0.0565002	-0.00990002	0.0670411	-0.0272846	0
98.8	0.00548005	-0.0188369	0.00377266	-0.0118766	0.0113058	0.0211934	-0.0272568	-0.0279347	-0.00852481	-0.0173589	0
99	-0.0399216	0.0651399	-0.00786744	0.00501877	0.0296174	0.00424987	0.0327475	0.00557483	0.00982462	0.0371217	0
99.2	-0.0184381	0.0859174	-0.0562328	0.0266229	0.0163743	-0.0212546	0.00413898	0.033826	0.0172357	0.0418594	0
99.4	0.0412467	-0.0151051	0.0313254	0.0628133	-0.014423	-0.0356503	-0.0165012	0.0379726	-0.0609069	-0.00143398	0
99.6	0.0181323	0.0120129	-0.00143372	0.0165105	0.0255355	-0.014432	-0.0356287	0.00725696	0.0469304	-0.00992582	0
99.8	-0.0139063	0.0359038	-0.0139623	0.0116794	0.00625877	-0.016546	-0.0101406	0.0246321	-0.0186998	0.0165925	0
100	0.0319332	0.0398996	0.0578044	0.0454941	-0.0110628	0.0209559	0.040527	-0.00780878	0.0138402	0.011341	0
100.2	0.0532633	0.0130117	0.0526193	-0.000884502	0.0096629	0.0106382	0.0452795	0.00189746	0.0740908	-0.011428	0
100.4	0.0250594	-0.0188174	0.00244838	-0.0291894	0.00445341	0.0166091	0.0173551	0.0402787	0.0170768	-0.00921764	0
100.6	-0.00192298	-0.013948	0.0160528	0.0392866	-0.0175002	0.0601052	-0.00715049	0.0105463	-0.0333233	-0.000883746	0
100.8	-0.0428858	-0.0158914	-0.0104046	0.0196157	0.022987	-0.0351378	-0.0318286	0.000125725	-0.0268915	-0.0255157	0
101	0.00229139	-0.0400336	-0.0103979	-0.00917139	0.0310986	0.0203939	0.017003	-0.0409839	0.00800287	-0.0412862	0
101.2	-0.047733	-0.0485628	-0.0204338	-0.0157974	-0.00456436	-0.00137851	-0.0383039	-0.0607626	0.034743	0.0270065	0
101.4	-0.0659344	-0.039281	-0.0395051	-0.0646231	-0.0296125	-0.0181884	0.0116578	-0.0430041	-0.0402152	-0.00318655	0
101.6	0.0022184	-0.038243	-0.0199808	-0.0666248	-0.0354456	0.0234276	0.0047154	-0.0206489	-0.0978259	-0.0336974	0
101.8	0.0314732	-0.0303626	-0.00101526	0.011055	-0.0353707	0.0193362	-0.043484	0.0259773	-0.0303173	0.016805	0
102	-0.00182734	0.0122193	-0.0213436	0.0273462	-0.0153401	-0.0209991	0.0663843	0.0742847	0.0363695	-0.00769081	0
102.2	0.00170011	0.0391089	0.0134354	-0.0328168	0.0188326	-0.000997389	-0.0239324	0.00118047	0.0203966	-0.0415397	0
102.4	-0.00729247	0.0044988	0.0318126	-0.039243	0.0167108	-0.0238549	0.0311896	-0.0380762	0.0521013	0.0279182	0
102.6	0.0104465	0.0181577	-0.0132404	0.00954081	0.0273483	-0.02364	0.00619282	0.0106234	-0.00422021	0.00919099	0
102.8	0.0212093	0.0605409	0.0171861	0.0177998	-0.00132834	-4.28608e-05	-0.00499796	0.0168732	-0.026523	-0.0200064	0
103	-0.00991908	0.0360435	0.0433624	-0.00541193	-0.0281125	0.0132102	0.0418776	0.0268266	0.0176447	0.0250101	0
103.2	-0.026605	-0.0153285	0.0093294	-0.0130596	-0.00124871	0.0336254	0.0113695	0.0465236	0.00967653	0.0514798	0
103.4	0.0111969	0.000787369	0.0328837	-0.0159099	-0.00140983	0.0444241	-0.038348	-0.0221162	0.000672905	0.00960731	0
103.6	0.0151188	-0.00713189	-0.0602998	0.0160903	-0.0208086	-0.0269933	-0.0186956	0.0401212	0.0520287	-0.0221619	0
103.8	-0.0167128	-0.0324317	-0.0426654	0.00406951	-0.0347241	-0.0416877	-0.0203171	-0.0272285	-0.0428101	0.00334388	0
104	0.00825193	-0.0503776	-0.026359	-0.00158837	-0.0137769	-0.0214285	-0.0380506	-0.0824393	-0.0138287	-0.000586124	0
104.2	0.00744998	-0.0297107	0.00591139	0.0125183	-0.00171931	-0.0367275	-0.0229021	-0.0716931	0.0216327	0.00496431	0
104.4	-0.0306657	-0.0139462	0.0210844	0.00618567	0.00101637	-0.0435835	-0.00062626	-0.0463575	-0.0237572	0.0151908	0
104.6	-0.0273244	-0.0429357	-0.0442179	0.00402354	0.0223482	0.00330903	-0.00231737	-0.0109529	-0.0111285	-0.00993757	0
104.8	-0.0327914	-0.0353269	-0.0277802	0.0434321	0.0124697	0.022261	-0.00377171	-0.00531027	-0.0193849	-0.000711292	0
105	-0.0147018	0.0155216	-0.0161622	0.0132759	-0.0124852	-0.0049528	-0.0472822	-0.0124523	0.0188718	-0.0266493	0
105.2	-0.0243552	-0.032471	0.0045123	-0.0331611	0.0142675	-0.00179491	-0.0317196	-0.00781401	0.0226844	0.0298748	0
105.4	0.000165064	-0.0182503	0.0154779	0.0205385	0.0217494	-0.0483488	-0.00680555	0.0297299	0.0113089	0.0217567	0
105.6	0.0155144	0.0380777	0.0228099	0.0420709	0.0027109	-0.0655037	-0.038781	0.0136082	-0.00429903	-0.0227864	0
105.8	-0.0166949	0.0265567	0.0408172	-0.0115404	-0.0162047	-0.00799015	-0.0415489	-0.011375	-0.000416083	-0.0121892	0
106	-0.0227722	0.0243046	0.0218415	-0.0020627	-0.0381203	0.0156148	0.0533355	0.0387751	0.0119637	-0.0193025	0
106.2	-0.0153104	0.0467599	-0.0482078	-0.0266257	-0.00488511	0.0418639	0.088221	-0.0147141	-0.0680097	-0.0239786	0
106.4	0.000830722	0.0223982	-0.0288484	-0.0491263	0.0408612	0.00111289	-0.000869025	-0.010563	-0.022051	-0.020925	0
106.6	0.0441907	0.0376746	-0.0238064	0.0210683	0.0265436	-0.019476	-0.0221054	0.0103785	-0.0411161	0.00624797	0
106.8	0.0180844	0.0168226	0.0139551	0.0349224	0.00468992	0.00721121	-0.0241653	0.0271064	-0.0386262	-0.00231795	0
107	0.000795	-0.0124608	0.0383476	0.00436555	0.00233408	0.0143995	-0.000323411	0.00959957	0.0195034	-0.0051849	0
107.2	0.0370374	0.00373656	-0.0094254	0.00647663	-0.0063962	0.00380133	0.0574175	-0.0336976	0.0435531	0.0129775	0
107.4	-0.00558281	-0.0134363	-0.00941599	-0.0272924	-0.000224049	0.0373669	0.0141348	0.000385288	0.0632332	-0.0163149	0
107.6	0.0298692	0.0261159	-0.00877946	0.0392232	0.028113	0.0423168	0.0066741	0.0766712	-0.00506092	0.042124	0
107.8	0.0115549	-0.0348355	0.0374481	0.0329966	0.0377831	-0.00415765	-0.0103643	0.078736	-0.0170273	0.0226459	0
108	-0.00635733	-0.0229622	0.0295657	-0.0044825	0.012166	0.000523416	0.00742822	0.00377117	0.00453693	0.0191157	0
108.2	-0.0112418	0.0216379	0.0184913	-0.0125778	0.000506574	0.00993465	0.0356113	-0.000618111	-0.00676262	0.00978511	0
108.4	0.0152102	-0.0111453	0.029274	0.00574511	0.0121139	0.013511	0.0263667	0.0105347	0.0057889	-0.0242931	0
108.6	0.0567307	-0.028721	0.00804732	0.00997344	0.0142137	0.0314159	0.0152533	-0.0382113	0.0645536	0.00423748	0
108.8	-0.000975829	0.0161542	0.0186702	-0.0306212	0.0293216	-0.0239432	0.0264114	0.0377837	0.0562287	0.0371886	0
109	0.0345039	0.0229573	0.00451574	0.0141443	0.0568862	0.0226306	-0.000231779	0.0427294	0.0424946	0.00911148	0
109.2	0.0224777	-0.0294906	0.00633546	0.0181811	0.041416	0.0352	-0.0326079	0.0364902	0.00929998	0.0168235	0
109.4	0.0031724	-0.00232347	-0.00574948	0.0311157	0.0298368	0.0361751	-0.0113406	0.0191255	-0.0472624	0.0457914	0
109.6	0.00579211	0.0217763	-0.0140608	0.0228779	0.0192888	0.0395686	0.0314356	-0.0317189	-0.0135975	0.0138511	0
109.8	-0.0158371	-0.000783983	0.000971979	-0.0143084	-0.0105554	0.0115426	0.0132221	-0.0427474	0.0405875	-0.021048	0
110	-0.0223009	0.0380864	0.00675004	0.0291886	-0.0269901	-0.0140231	-0.00747005	0.00157774	-0.0282873	-0.00591884	0
110.2	0.0151596	0.00362528	0.022932	0.0383763	-0.0457756	-0.0241728	0.0825735	-0.02888	-0.000861853	-0.0739864	0
110.4	-0.0137423	0.0297513	-0.0121163	-0.0481622	-0.0465329	-0.0089676	-0.0317989	-0.0104287	-0.00763431	-0.00268388	0
110.6	-0.0441779	-0.00255224	-0.0148691	-0.0412268	-0.0376626	-0.0100214	-0.0295972	0.0204476	-0.0498959	0.00282763	0
110.8	-0.0268843	-0.03988	0.0183269	-0.0202561	-0.0494785	-0.00210251	0.0269207	0.00564628	-0.0570673	-0.0410297	0
111	-0.0150147	-0.0297429	0.0231558	-0.0397828	-0.0453338	-0.019151	-0.023322	-0.0325638	-0.0237744	-0.0140125	0
111.2	-0.0267949	-0.0103722	-0.0260557	-0.0298475	-0.0211318	-0.0637866	-0.0428127	-0.0388581	-0.0086884	0.0209455	0
111.4	-0.00824786	0.013635	-0.0693859	-0.0316237	-0.0375138	-0.0356219	0.00268351	-0.00529336	-0.020606	-0.00783734	0
111.6	-0.00119182	-0.0337795	-0.00969332	-0.0231693	-0.0130903	-0.0205847	-0.0677416	0.0109602	0.026255	-0.0242794	0
111.8	-0.00952711	0.0482432	-0.0231853	0.0108864	-0.0186449	0.00151052	-0.00879663	0.00675703	0.0473633	-0.00930951	0
112	0.0101758	0.0105602	-0.0317953	0.0540323	0.00586813	0.0232089	0.00892565	-0.0102889	0.0156084	0.00642975	0
112.2	0.0273768	-0.0420427	-0.00532929	0.0323554	0.0314461	0.0476401	0.022863	-0.0178648	0.030736	-0.000571969	0
112.4	0.00903847	0.0150781	0.00174415	-0.0350794	0.015978	0.0350584	0.0530921	-0.00449107	0.0353186	-0.010501	0
112.6	-0.00846236	0.00631719	-0.0146753	-0.029825	0.0105804	-0.0213858	-0.0143637	-0.0112105	-0.040127	-0.0122609	0
112.8	0.000698963	-0.0166532	-0.0350632	0.0336283	0.0184583	-0.0160136	-0.00330411	-0.0442278	-0.00208975	-0.0237151	0
113	0.0166079	-0.00977991	0.0187992	0.0103741	0.0196208	-0.0267418	-0.00970412	0.0395831	0.0191275	0.0120836	0
113.2	0.023102	0.00353117	0.0641901	0.0171232	0.0231987	-0.000292337	-0.0330072	0.0337086	-0.0217623	-0.0221273	0
113.4	-0.0131141	-0.0677524	0.0135715	-0.00539857	0.00361111	-0.0279356	-0.0513341	-0.0076575	-0.0202236	-0.0314139	0
113.6	-0.0373136	-0.0472026	-0.0385876	-0.00335417	-0.0174356	-0.0519747	-0.0584704	-0.00233233	0.0223941	0.0210977	0
113.8	-0.0116347	0.0804511	0.0120349	0.0460749	0.00803478	-0.0132714	-0.0215865	-0.00285265	0.00567338	0.0510873	0
114	-0.0113396	0.0352119	0.0460481	0.00947704	0.0426521	-0.0195638	0.0368617	-0.0240224	-0.0245248	0.036497	0
114.2	-0.0389074	-0.0157611	-0.0654446	0.0116036	0.00889769	-0.00305897	-0.00982388	-0.032383	0.0542219	-0.0167122	0
114.4	0.00666837	-0.000690077	-0.0536199	-0.0150854	-0.0152963	-0.00821633	-0.0254487	-0.011592	-0.0138755	-0.0313935	0
114.6	0.0173246	0.00647178	0.0310164	-0.0192601	-0.00559794	0.000292087	0.0243817	0.0514735	-0.0322678	0.0113307	0
114.8	0.00799473	-0.00490835	0.00583679	-0.0131448	-0.0255799	0.0439929	0.0711262	0.053968	-0.0247011	0.0108904	0
115	0.0138379	-0.00179183	-0.0340268	0.00670099	-0.034709	0.0371192	0.0695557	0.0261684	-0.0392049	-0.0180785	0
115.2	0.00543056	-0.00985357	0.0304676	0.0420027	-0.00519947	-0.0101482	0.0228503	0.0240979	0.00306854	0.00246585	0
115.4	-0.00253245	-0.0376616	0.0357017	0.0144997	-0.0295698	0.0396569	-0.0247877	-0.036393	0.0218816	0.0135549	0
115.6	-0.023366	0.0192709	0.00636249	-0.00965806	0.00467094	0.0421786	0.00382286	0.00471665	-9.20163e-05	0.0150431	0
115.8	0.0371338	0.0153966	0.00967871	-0.0418723	0.00738339	-0.00877884	-0.0315021	0.0200789	0.0275124	0.0121923	0
116	0.0371106	-0.00585614	0.0138561	-0.0231423	-0.0303954	-0.00966235	-0.022865	-0.0270527	0.0244341	0.00269555	0
116.2	-0.0153781	0.0104738	0.00381496	0.0437195	-0.00153525	0.00115466	-0.0190275	-0.0163177	-0.00415408	0.00535047	0
116.4	-0.00593161	0.0215248	0.00874937	0.0244738	0.040054	-0.0177533	-0.0409879	0.0157169	0.000225021	0.00580456	0
116.6	0.0115473	0.0137416	0.0163271	-0.0746756	-0.00847156	-0.0159963	-2.49432e-05	-0.0208476	-0.00309896	-0.00481274	0
116.8	-0.0366529	0.0185422	-0.0107068	-0.0349259	-0.00517413	-0.0245626	-0.0334556	0.0127007	-0.0381288	0.0217185	0
117	-0.0171328	-0.021605	-0.00948682	-0.0386469	-0.0156114	-0.0484772	-0.0170982	-0.0321439	-0.0449009	-0.00459911	0
117.2	0.000623851	-0.014032	-0.0532671	-0.0451141	-0.0133728	-0.057197	0.0300555	-0.0533709	-0.0477645	-0.000415127	0
117.4	0.0138723	0.0144807	-0.0237428	0.0151458	0.0288624	-0.0163564	0.0331518	-0.00196881	-0.0231341	0.0309651	0
117.6	-0.00694812	-0.00619267	0.0508962	0.0433978	0.0741824	0.0367174	0.025779	0.00353294	0.00013856	0.00186807	0
117.8	-0.0510768	-0.00952365	0.0351829	-0.0116901	0.0564447	0.0416277	-0.0103932	-0.038797	0.0188105	-0.0340128	0
118	-0.0206996	0.0483152	-0.0215524	-0.0308531	-0.0100079	0.00381422	-0.0788272	-0.0143345	0.0684232	0.0184102	0
118.2	-0.00336057	-0.0131075	-0.0640365	-0.0154966	-0.00403487	-0.0281147	0.0536611	-0.0272131	0.00980672	-0.00106053	0
118.4	0.00218334	-0.0664105	-0.019954	-0.0367834	0.00708549	-0.00248912	-0.0168833	0.03825	-0.0479047	-0.022673	0
118.6	-0.014825	-0.020918	0.00306905	-0.0102081	-0.004787	-0.0189373	-0.0243365	0.0170726	0.0212732	-0.0281905	0
118.8	-0.00963341	0.00575574	-0.00628941	0.011007	-0.0436171	-0.00991155	0.028457	0.00580889	0.0416606	-0.0329341	0
119	0.0158875	-0.0355975	0.0111901	-0.0144089	-0.0822811	0.0226167	-0.0125865	0.0252331	-0.0201422	-0.00853415	0
119.2	0.022373	-0.0529525	0.0216711	-0.00954826	-0.0868393	0.022894	-0.0230601	-0.0268294	0.011875	0.0225368	0
119.4	0.0398878	-0.0234259	-0.0243204	0.0138768	-0.0798026	0.0878598	0.0695185	0.00448673	0.0707049	-0.00921817	0
119.6	0.0436893	0.0304232	-0.0225871	-0.00865792	-0.0816581	0.0564208	0.118245	0.0160661	0.034498	0.0132262	0
119.8	0.0469212	0.0242125	0.0525173	0.0120269	-0.0726284	0.0283107	0.0486624	-0.0145595	-0.00764261	0.000814483	0
120	0.0202627	0.0213636	0.0660672	0.0479166	-0.0700013	0.0295021	-0.0108873	0.0281375	-0.00894762	-0.00292069	0
120.2	0.029243	0.0815844	0.0458141	0.0427895	-0.0170198	0.016696	-0.00982183	0.0716653	0.0242211	0.0541247	0
120.4	0.0638936	0.114735	0.065699	0.0646871	0.052718	-0.00615784	0.00590118	0.0257865	0.0226007	0.0824305	0
120.6	0.0305747	0.0712233	0.0662705	0.139372	0.055482	-0.00552899	0.0142265	-0.00842077	-0.0100291	0.0359755	0
120.8	0.0320046	0.0890786	0.0550548	0.105333	0.10272	0.00721511	0.00629755	0.0175109	0.0822136	0.0549302	0
121	0.0500638	0.0813686	0.0897806	0.0665598	0.0600836	-0.00489989	0.0527779	0.0380293	0.0884167	0.0769153	0
121.2	0.0548249	0.150569	0.106241	0.0887089	0.0211516	-0.00177243	0.0890662	-0.0155068	0.0279603	-0.00214052	0
121.4	0.0733574	0.138473	0.0860041	0.0644473	0.00365313	0.042692	0.0642545	0.00205112	-0.000785256	-0.038571	0
121.6	0.0661848	0.0634681	0.0848135	0.025171	0.0194027	0.0752125	0.0274805	0.0533503	0.0547229	0.00565795	0
121.8	0.0277916	0.0863932	0.107772	0.0649356	0.0532915	0.0662657	0.0569611	0.0267718	0.0878342	0.0274116	0
122	0.0483894	0.0937217	0.0942573	0.0873109	0.0279829	0.0546423	0.121777	0.0337537	0.0208966	0.0437418	0
122.2	0.0608491	0.0528531	0.0751016	0.0469397	0.0478756	0.0251682	0.0857842	0.0382848	0.112266	0.0520259	0
122.4	0.0670017	0.0708498	0.117035	0.0332929	0.0329188	0.04665	0.0405728	0.0264734	0.0612185	0.0125988	0
122.6	0.0387885	0.0872081	0.114611	0.0503519	0.0418754	0.0319446	0.0856769	0.0421372	0.0656279	-0.028367	0
122.8	0.0160526	0.0481006	0.065735	0.0529163	0.0300296	0.0203777	0.0566029	0.0253066	0.0386344	-0.0258044	0
123	0.052268	0.0691165	0.0809799	0.0825781	0.0391019	0.0523795	0.00758947	0.0771608	0.000691375	0.0136919	1
123.2	0.125631	0.159976	0.154726	0.162971	0.119373	0.0812248	0.107861	0.233061	0.123398	0.068413	1
123.4	0.184385	0.1223	0.154529	0.176179	0.0886256	0.125439	0.133766	0.172998	0.106411	0.124124	1
123.6	0.198435	0.15297	0.106983	0.130469	0.105278	0.113206	0.14091	0.110321	0.116054	0.145351	1
123.8	0.154053	0.212974	0.131487	0.0642639	0.0890131	0.080024	0.0781319	0.127019	0.184658	0.115055	1
124	0.131801	0.202506	0.107426	0.0875363	0.0913627	0.0580942	0.0674935	0.13157	0.174465	0.0827062	1
124.2	0.131247	0.153597	0.0879411	0.106228	0.100534	0.0433566	0.114244	0.0812342	0.120317	0.0770299	1
124.4	0.0904073	0.130217	0.117379	0.0627407	0.0597824	0.0192388	0.0803302	0.0523472	0.0954021	0.0857598	1
124.6	0.0378455	0.109373	0.0602544	0.076474	0.0313155	-0.00274936	0.00951227	0.0713839	0.0488297	0.0955479	1
124.8	0.0382629	0.0641917	0.0520298	0.0573737	0.0359266	0.0120997	0.067073	0.0292517	0.0333999	0.0882275	1
125	0.0385325	0.0280769	0.100255	0.0185369	0.0370101	-0.00175023	0.0379806	0.00733598	0.0505669	0.0558451	1
125.2	0.0273463	0.0302543	0.0376464	0.0509026	0.0496735	-0.018703	-0.0650866	0.0305005	0.05108	0.0477036	1
125.4	0.00654325	0.0456987	0.00178275	0.0613532	0.0417674	-0.0511126	-0.0579611	0.0334445	-0.00540866	0.0240341	1
125.6	-0.00846043	0.0305293	0.0420901	0.030508	0.0271625	-0.0552754	0.00918423	0.00696839	-0.0214742	0.0195689	1
125.8	0.00714114	-0.0212017	0.00565716	0.0839434	0.0632794	-0.0232384	-0.0108625	-0.011202	0.0393521	0.061803	1
126	0.03154	-0.036097	-0.0448849	0.155525	0.113432	-0.0526452	-0.0423395	-0.0221908	0.0315756	0.0321287	0
126.2	0.00743903	0.0688216	0.0334186	0.0246371	0.101913	-0.0459313	-0.0364333	-0.00408482	0.0221662	-0.0149098	0
126.4	0.00565721	0.0761205	0.0056049	0.00521291	0.0806177	-0.0685988	0.0462277	0.000855748	0.0609573	-0.00589887	0
126.6	-0.0184104	-0.0451133	-0.00414576	0.0404596	0.0243942	-0.0671529	0.0190217	-0.0245475	0.0219774	0.011994	0
126.8	-0.0409014	-0.0136939	0.0331637	0.0826288	0.0020965	-0.0288492	-0.0179595	-0.0269347	0.00631526	0.00230935	0
127	-0.0265369	0.0584687	0.0148602	0.0851248	0.0142934	-0.0146901	0.0194245	0.00498175	0.0694524	-0.0119257	0
127.2	-0.0169505	-0.0622842	0.00282987	0.0182138	-0.0160526	-0.0247848	0.012077	0.0302711	0.0595913	-0.0129577	0
127.4	-0.0148302	0.0184803	0.0637692	0.0637833	-0.00785956	-0.0259867	0.014952	0.0360387	0.0148218	-0.0108641	0
127.6	-0.0204653	0.072883	0.0207506	-0.003744	-0.0137481	-0.0765697	-0.046479	-0.0377298	0.0255148	0.00107069	0
127.8	-0.00964014	-0.0181908	0.00111072	0.0261412	-0.00470405	-0.010355	-0.018856	0.00817388	0.0188448	0.00714247	0
128	-0.000116861	-0.0101298	0.043429	0.0371208	0.0126334	0.0403173	0.0463519	0.040825	0.0113289	0.00501373	0
128.2	-0.0137735	0.00833587	-0.0066773	0.0205083	0.00807754	-0.0347114	0.0309172	-0.00286199	0.0063588	-0.0263238	0
128.4	-0.0252716	-0.0730083	-0.072301	0.0535672	-0.00644454	-0.0650248	-0.00950172	-0.0240611	-0.020037	-0.0465058	0
128.6	-0.0157581	-0.0212489	0.0234041	0.00651353	6.88211e-05	0.0241972	-0.00186873	-0.0325151	-0.0255732	-0.00998866	0
128.8	-0.0283139	0.0348809	-0.026983	-0.0318069	0.0184545	-0.00980368	-0.0377828	-0.0202973	-0.00408146	-0.0286406	0
129	-0.0152697	0.0513836	-0.0290875	-0.0251775	0.0354625	0.0026493	0.00270292	-0.0166683	-0.0317299	0.0195538	0
129.2	0.00368319	0.00895181	0.0144533	-0.0133837	0.0169968	0.0316039	0.0287572	0.018515	-0.013935	0.0269157	0
129.4	0.0137603	-0.0427492	0.01599	-0.000162065	0.00784488	0.00854448	0.00041296	-0.00063883	-0.000291761	0.0323524	0
129.6	-0.00972579	-0.0151797	0.00441306	0.0165548	-0.000146309	-0.0304402	-0.0316584	-0.0172452	-0.0263265	0.0276103	0
129.8	-0.0317119	0.0325247	0.0123093	0.00327506	-0.0331416	-0.0254756	-0.0272036	0.0363512	0.0006704	-0.0300683	0
130	0.0151163	-0.0310821	-0.0113063	-0.0407228	-0.025075	0.0102491	0.0109181	-0.000137463	0.0622784	-0.0108722	0
130.2	-0.0282148	-0.0237903	-0.0222143	-0.0341303	-0.0273998	0.00688415	0.000319909	0.0138298	0.0227176	-0.02732	0
130.4	-0.0175982	-0.0167792	-0.05281	0.0198726	-0.029614	-0.0117656	-0.011553	-0.00760123	-0.0274448	0.0011364	0
130.6	0.0103374	-0.00357694	0.0026551	-0.00710228	-0.0317922	-0.0131175	0.00393854	0.00983833	0.012319	0.00637455	0
130.8	0.012994	-0.014519	0.0293661	-0.0213715	-0.0264602	-0.00199241	0.0183907	0.00445825	0.0185633	-0.0225226	0
131	0.00691759	-0.0381671	-0.0250155	0.0163671	0.00511915	0.00132145	-0.000146123	-0.0336094	-0.0122972	-0.0154706	0
131.2	-0.000955577	0.00492652	0.00352141	-0.0112809	0.0472802	-0.00147065	-0.0129528	0.0055652	0.022802	0.00958187	0
131.4	0.0174665	0.0343951	0.042333	0.0090585	0.0503806	0.00116229	0.0411778	-0.00522151	-0.0454696	-0.00817184	0
131.6	-0.0187466	0.0042047	0.0368549	0.0388185	0.0196293	-0.0246988	0.0357247	0.0106298	-0.0514887	-0.0290495	0
131.8	-0.0408436	0.00721006	0.00148589	0.0307302	0.00554096	-0.0458291	-0.0203879	-0.0245509	-0.026291	0.0180796	0
132	-0.0185703	-0.00628771	-0.0262178	0.00367553	-0.0123979	-0.0528566	-0.0996066	-0.0911102	-0.024728	0.022897	0
132.2	-0.0193772	-0.0191121	-0.0144158	-0.0401524	-0.0285118	-0.0349598	-0.106707	-0.0504544	-0.048064	-0.0218522	0
132.4	-0.0258612	0.0165282	0.00529769	-0.0510652	-0.0260591	-0.00506833	-0.0344116	0.0580929	-0.0489161	-0.0260879	0
132.6	0.023446	0.0092291	-0.0395888	0.00313286	-0.0375689	-0.0134103	-0.0294261	0.0318569	0.000971381	-0.014498	0
132.8	-0.00765935	-0.0227629	-0.090203	-0.0532796	-0.0412847	-0.0240356	-0.0309474	-0.0410863	0.00699098	0.00227271	0
133	0.0186399	0.0184817	0.00934609	-0.0216431	-0.041371	0.0170055	0.053842	0.0056268	0.00893862	-0.00861467	0
133.2	0.0164051	0.0273303	-0.00473421	-0.0318786	-0.0557673	0.0338545	0.0556334	-0.00928597	0.04879	-0.0086141	0
133.4	0.0136534	-0.011444	-0.0548084	-0.0256917	-0.0442336	0.0293716	0.0158427	0.0051821	0.0615336	-0.0177085	0
133.6	0.0255946	-0.039647	-0.0147284	0.0543965	0.0141325	0.0282913	0.0222894	0.054336	0.0380674	-0.0306255	0
133.8	-0.0158108	-0.0483045	-0.00390262	0.0519408	0.05064	0.0155374	0.0296503	0.0096171	0.0156245	-0.00185415	0
134	-0.0347674	-0.0294957	-0.000668974	-0.0109289	0.0343559	0.0155713	0.05059	0.0268607	-0.0442905	0.0246312	0
134.2	-0.0209335	0.00907955	0.0299774	0.05101	0.0902298	0.0206012	0.0460416	-0.033065	-0.0465025	0.0118445	0
134.4	0.0264477	0.0647005	0.0582502	0.0435072	0.0885005	0.0422237	-0.000141435	0.0313285	0.0312278	0.00712173	0
134.6	0.0354263	0.045364	0.0735533	0.0310366	0.0714009	0.0154876	0.012008	0.051417	-0.00401646	0.0602866	0
134.8	0.00651759	-0.00547236	0.0558872	0.0443602	0.0961682	0.0147773	0.0218717	0.00204062	-0.0122139	0.0971707	0
135	0.00278901	0.0242046	0.0258518	0.00919045	0.0929763	0.0373338	-0.0245099	0.0178574	0.0440573	0.0624961	0
135.2	0.0207777	0.0695423	0.0258342	-0.00478659	0.0330222	-0.00482838	-0.00829423	0.0301764	-0.0349878	0.0329833	0
135.4	0.0114471	0.0132267	0.0114604	0.0669885	0.0135158	0.0333841	0.041478	-0.000871476	0.0144419	0.0422516	0
135.6	0.00201776	0.0345106	0.0113305	0.0154685	0.00466393	-0.0688941	-0.0196558	0.0222463	0.0137513	0.0185115	0
135.8	0.0114652	0.0237696	-0.00541256	-0.0439769	-0.00305389	-0.0390293	-0.023036	-0.0138937	0.0489258	-0.0298637	0
136	0.0162498	-0.00123476	-0.0104061	-0.0209574	-0.0137753	0.014712	0.0308519	-0.0255272	0.0741155	-0.0431561	0
136.2	0.0180925	-0.0241334	-0.010397	0.0195352	-0.0146559	-0.00204489	0.024403	-0.00255675	0.0445851	-0.0300556	0
136.4	0.0249047	-0.0522224	-0.0141684	0.0081545	-0.0177527	0.00545149	-0.0275698	-0.00930836	0.0360514	-0.0308477	0
136.6	0.00529534	-0.000943123	0.0109207	-0.0240839	-0.0472315	-0.0214071	-0.0197209	0.0257455	0.0230111	-0.0390528	0
136.8	-0.0263699	0.0219601	-0.0278698	-0.0106524	-0.0263459	0.00300723	0.0429165	-0.00107927	-0.0672371	-0.0574063	0
137	-0.0137305	-0.00490863	-0.0263239	-0.0128844	-0.0255396	-0.00219801	-0.0150739	-0.0272293	-0.0469718	-0.0268373	0
137.2	0.0147249	-0.0024194	-0.0183506	0.0077404	-0.0834147	-0.00849508	-0.0325462	-0.0334119	-0.0107225	-0.00863994	0
137.4	-0.0236439	-0.0337349	-0.00695497	-0.00494961	-0.0712801	0.000723031	-0.0225927	-0.0168152	-0.00519842	-0.0115224	0
137.6	-0.0620389	-0.103708	-0.00432308	-0.0439202	-0.0116404	-0.0198933	-0.0397429	-0.0170951	-0.0247972	0.01482	0
137.8	-0.0029692	-0.0708952	-0.0294325	-0.0363338	-0.021595	-0.040627	-0.0258904	-0.0459059	-0.0500305	0.0459279	0
138	0.0212574	0.0377075	0.00136354	-0.0530485	0.00444049	0.010898	-0.0384476	-0.0193664	0.0148151	0.0172046	0
138.2	-0.0246494	0.041828	0.00804211	-0.00108948	-0.0251924	-0.00404154	0.0323578	-0.0199869	-0.0179734	-0.00845967	0
138.4	-0.0104716	0.0298015	0.00305994	0.00307	0.00532697	0.0165386	0.0725157	0.0121498	0.00304097	-0.0116134	0
138.6	0.0732696	0.0626743	0.0238035	0.0181643	0.0322748	0.0506147	0.0346638	0.0406874	0.00614728	0.00418995	0
138.8	0.0572643	0.0568604	0.0571709	0.0467548	0.0516423	0.0724621	0.024255	0.0613281	0.0305392	0.0198583	0
139	-0.0160254	-0.0079331	0.0291839	0.0235511	0.0572753	0.0575031	0.0266514	0.0589288	0.0714418	0.015583	0
139.2	0.0255845	-0.0375649	-0.0432643	0.0033859	-0.0144005	-0.0121724	-0.0550893	0.000426274	-0.0199857	-0.0120835	0
139.4	-0.0283227	-0.0260361	0.00860502	0.0104658	0.0104855	0.0125382	-0.0515339	0.0141869	-0.00775497	-0.0434589	0
139.6	-0.00589911	0.0657315	0.0261785	-0.0116206	-0.00262601	-0.00302555	0.014259	-0.0200286	-0.00402127	-0.0100962	0
139.8	0.00853925	-0.00725371	0.0408779	0.00922233	-0.0401083	0.0130756	0.054599	0.0444676	-0.00150396	0.0122915	0
140	-0.00175063	-0.0385734	0.0149282	0.0126333	-0.020696	0.0165112	0.0321094	0.0589275	-0.00158048	-0.0390208	0
140.2	0.00192383	0.024601	-0.0317129	-0.0108719	-0.0185661	-0.023207	0.00313578	-0.0335678	-0.0250327	-0.0676125	0
140.4	0.0185865	-0.000463016	-0.0279312	-0.0161756	-0.0582329	-0.0324172	0.00260292	-0.0520875	-0.0417743	0.00137141	0
140.6	0.0416384	0.0062589	-0.0432845	-0.0583913	-0.00576626	-0.0265283	-0.0165119	-0.023054	-0.0183178	0.0457984	0
140.8	-0.0212716	-0.0521831	-0.0453366	-0.0371217	-0.00806472	-0.0295304	-0.0128291	-0.0184567	0.0198153	0.00609621	0
141	-0.0327436	-0.0510341	0.0262109	0.0165383	-0.00604551	0.0119973	0.00434694	-0.0145647	-0.00363929	-0.0100257	0
141.2	0.00558624	0.00913966	0.0370842	0.0146615	-0.0101885	-0.0095271	0.0459084	-0.0069654	-0.00526534	-6.05392e-05	0
141.4	0.0204274	0.0561788	-0.0171024	0.0223518	0.000558478	-0.0204634	0.0512105	0.0115489	0.055693	0.0274129	0
141.6	-0.0169111	0.0433791	-1.96542e-05	0.0469171	0.0129948	0.0163999	-0.0145708	0.0140454	0.0780344	0.0413898	0
141.8	-0.0479374	-0.0162412	0.0529588	0.0118407	-0.0110798	-0.00722651	-0.0633285	-0.0115345	0.00589848	0.019052	0
142	-0.000490705	-0.0487211	-0.0166982	0.00844804	0.0119655	-0.00915173	-0.0384531	0.00468371	-0.0397033	0.0324484	0
142.2	-0.0259225	-0.0598859	-0.00720393	-0.0107815	0.00734342	-0.0224555	-0.0377623	-0.0188084	-0.00809659	0.00174156	0
142.4	-0.0269674	-0.0271829	0.0202282	-0.00694213	0.00281157	-0.0145513	-0.0380388	-0.0539833	0.00110107	-0.00833306	0
142.6	-0.00840198	0.0510693	0.0119267	-0.0221953	0.00611146	0.00329022	0.00228172	-0.0234312	0.00173698	0.0384527	0
142.8	0.015844	0.0640013	-0.00908905	-0.0353673	0.00555875	-0.00937191	0.017919	0.00344142	-0.0241472	0.0323196	0
143	0.0400652	0.00691083	-0.0288169	-0.00259394	0.0114265	-0.0106738	-0.0113725	0.00124464	-0.0764532	-0.0486771	0
143.2	0.00740123	0.00917432	-0.0130722	0.0116716	0.0222463	0.030825	0.00691668	0.0435047	-0.0472552	-0.0557166	0
143.4	-0.0068541	-0.0109362	0.0731552	-0.00054539	0.00994355	-0.0166597	0.0307571	-0.00368934	0.0110473	-0.00819111	0
143.6	0.0289123	0.027889	0.000614677	-9.58892e-05	0.00355398	-0.0409753	-0.0065884	0.0216645	-0.00745631	-0.0022508	0
143.8	-0.00661491	-0.00702857	-0.0603224	-0.013555	-0.00448833	-0.0168202	-0.00801508	-0.00223754	0.0184832	-0.0199284	0
144	-0.0438036	-0.0293549	-0.0448078	0.00980441	-0.0129781	-0.00969651	-0.0383566	-0.0278132	-0.00462902	-0.0225843	0
144.2	-0.024637	0.0168242	-0.0223986	0.0179927	-0.0074971	0.0169902	-0.0337051	0.013723	-0.0492313	-0.000172604	0
144.4	-0.00995772	0.0260966	-0.0115026	-0.0379163	0.00650407	0.0593471	0.0408584	0.0172811	0.028384	0.0105104	0
144.6	0.00964854	0.009469	-0.0159218	-0.00261021	0.011472	-0.0163275	-0.0519439	-0.0385232	0.0456241	-0.0200505	0
144.8	-0.0133464	-0.0682593	0.0224972	0.0402299	0.0135026	-0.0272182	-0.0154594	-0.0609382	-0.0297445	0.0172982	0
145	-0.0212172	-0.054711	0.0246552	0.0304043	0.0191767	0.00440342	-0.0103681	-0.0103051	0.00343342	0.0400144	0
145.2	-0.016798	0.00373463	-0.0157313	-0.0386373	0.0254614	-0.00950325	-0.0148235	-0.0035503	0.0451418	0.035117	0
145.4	-0.0129515	0.00829054	-0.0186565	-0.024226	0.00979044	-0.0243357	-0.0146074	-0.026198	0.0293773	0.0321898	0
145.6	-0.00906359	-0.00306162	0.00789878	0.0183658	-0.0287322	-0.00563893	-0.0221909	-0.0132187	0.014127	0.0109726	0
145.8	-0.00874113	0.00564944	-0.0121968	-0.0549276	-0.0363488	-0.0229024	-0.0121806	-0.00964519	-0.0125272	-0.0305652	0
146	0.0035438	-0.0471586	-0.0252058	0.00878151	0.0125786	-0.0572933	-0.0741786	-0.00363007	-0.0574889	-0.0246545	0
146.2	0.0152046	-0.0410162	0.0133408	0.036378	0.00174849	-0.0183067	-0.0706886	0.0543854	-0.0302021	-0.0197889	0
146.4	0.0186876	0.0337813	0.0527707	-0.0339968	-0.0232098	0.0172669	0.00255509	0.0332137	-0.0039575	-0.0234604	0
146.6	0.0243631	0.0624815	0.0226194	-0.0208732	-0.022285	0.0233487	0.0318013	0.010575	-0.0121471	0.00231089	0
146.8	0.0305172	0.0407442	-0.012921	0.0378973	-0.0100259	0.0410432	0.0678095	0.0472951	-0.0032074	0.0236472	0
147	0.0199956	0.031274	0.00963085	0.0210911	-0.01395	0.040013	0.105986	0.0566673	0.0246555	0.0068406	0
147.2	-0.00820011	0.00851688	0.00540246	0.0264459	-0.0253056	-0.0127002	0.0233978	0.0199592	0.0287794	0.00775205	0
147.4	-0.025983	-0.0179773	-0.0326877	0.0024763	0.0168244	0.00832244	0.0678002	-0.00295791	0.0518384	0.0189409	0
147.6	-0.0108672	-0.0273503	-0.0169569	0.022855	0.0292363	-0.00945263	0.0217291	-0.0204023	-0.00143789	-0.000276297	0
147.8	-0.0249972	0.0136939	0.0235425	0.0316039	0.036676	-0.0022703	-0.0279482	-0.0179007	-0.00526455	-0.00505005	0
148	0.0197358	0.0268889	0.014216	0.0296024	0.0268946	0.0238813	-0.00284309	-0.031269	0.0225335	-0.00560756	0
148.2	0.0802248	-0.00446021	-0.0159687	0.0174201	0.0118939	0.0366649	0.0372553	-0.0405704	-0.0106136	0.0207464	0
148.4	0.0303836	0.00804826	0.0133599	-0.023545	0.018829	0.0475255	0.0368434	0.0146172	-0.0263143	0.0674069	0
148.6	0.0252056	0.0417645	0.0572867	-0.00828902	-0.017229	0.0216993	-0.00624115	0.056594	0.0487482	0.000342015	0
148.8	0.0468466	0.0292447	0.0175873	0.0405589	-0.0211172	0.0422215	0.00354071	0.0046129	0.0422118	-0.0406868	0
149	0.0363733	0.0283983	0.0366938	0.0209458	-0.000858872	0.0242756	0.00643211	-0.0420563	-0.0157295	-0.0113691	0
149.2	-0.0156483	0.0127477	0.0217656	-0.0426971	0.00589576	0.0105215	-0.00569597	-0.0197778	-0.0527821	-0.000433426	0
149.4	-0.0568699	-0.0259752	-0.0466905	-0.0358838	0.00192777	-0.00644538	0.0406668	0.0113036	-0.0303303	-0.0131325	0
149.6	-0.0394378	-0.0448237	-0.0249921	0.0122669	-0.0060098	-0.038094	0.0762393	0.0178999	-0.000571695	-0.0130939	0
149.8	-0.0132707	-0.0535181	0.0452651	-0.0169069	-0.0232968	-0.016557	-0.0100322	0.0317192	-0.0281774	-0.0252186	0
150	-0.0602587	-0.0682238	-0.030352	-0.0326264	-0.0255272	0.000208446	-0.0358198	0.00971788	-0.0134131	-0.0211607	0
150.2	-0.0352192	0.019801	-0.0241978	-0.00852686	-0.0309486	0.0112281	-0.00217262	-0.0050175	0.0629731	0.0359494	0
150.4	-0.00560188	0.00803151	-0.0147699	-0.0278689	-0.0135841	0.0168335	-0.0224274	0.0354785	0.0457764	0.0102122	0
150.6	0.00780875	-0.00523792	0.014206	0.0157705	-0.00112385	-0.0199492	-0.0245903	0.0371163	0.00509424	-0.0291817	0
150.8	0.0159099	0.0222125	0.0430144	0.0617913	-0.00170483	-0.0346159	0.00510502	0.0180217	0.0177558	-0.00647271	0
151	0.0168365	0.0123709	0.0253678	0.0188572	0.0182896	0.00828898	0.0041805	0.033742	0.0143956	0.00281066	0
151.2	0.0361625	0.0604237	0.0478203	0.0462467	0.0331315	0.00876535	0.0123818	-0.0106567	-0.0145766	-0.0282509	0
151.4	0.0221142	0.031292	-0.00309314	-0.00470828	-0.00408331	0.0370691	-0.0185661	-0.0246084	-0.0127553	-0.03265	0
151.6	0.00225418	-0.00753666	-0.0288992	-0.0653374	0.0148801	0.0295129	0.0221928	0.027512	0.00104409	0.00671569	0
151.8	-0.0181972	0.0162209	0.00641205	-0.0316145	0.043028	-0.00307538	-0.00226622	-0.0120532	0.0227867	0.00152238	0
152	-0.0220111	0.00897932	-0.0142713	0.0172106	0.00634007	-0.0340876	-0.0565438	-0.0454615	0.0241109	-0.0110352	0
152.2	-0.00612411	-0.0243492	-0.0507677	0.00800675	-0.0292388	-0.0292401	-0.0391648	-0.0322125	-0.0226888	0.021349	0
152.4	-0.00675364	-0.00249515	-0.0040787	-0.015517	0.0022013	-0.00985156	-0.0263267	-0.0641851	-0.0622996	0.0213346	0
152.6	-0.0269399	-0.0415555	-0.0333478	-0.0438017	0.00219726	-0.067593	-0.0493733	-0.00116247	-0.0384883	-0.0307162	0
152.8	-0.0187416	-0.0632823	-0.0443354	-0.0330143	-0.0322494	-0.0508258	-0.0446858	-0.0445597	-0.0772638	0.0094605	0
153	-0.0279996	-0.0608164	-0.0645564	0.00518517	-0.0146592	-0.0672194	-0.0390833	-0.0287087	-0.0194332	0.0385307	0
153.2	-0.0562386	-0.0441509	-0.00963237	0.0281989	0.0107514	-0.016274	-0.0079421	0.00177561	0.0234459	0.0500607	0
153.4	-0.0391446	0.0175321	-0.00604665	0.0309913	0.0324911	0.0109675	0.0209994	-0.000112403	-0.0180291	0.0374699	0
153.6	0.0161381	0.0618065	-0.0555966	0.0153935	0.0645438	-0.0345995	0.0223742	0.0204245	-0.0361353	-0.00370689	0
153.8	0.0426843	-0.000548327	0.0480921	-0.00570684	0.0571093	0.0396763	0.0356746	0.0413449	0.0146346	-0.0103179	0
154	0.0693668	-0.0100067	0.00166891	0.0412015	0.0294196	0.0229648	0.0212556	0.0569508	0.0921323	-0.0120622	0
154.2	0.0260637	0.0525248	0.00624413	0.0610581	-0.0157955	0.0190799	0.0432829	0.0508744	0.01797	0.0237972	0
154.4	0.0315221	0.0702456	0.020414	0.0118347	0.0080411	0.0426604	0.0263401	0.0316135	0.0727982	-0.0190875	0
154.6	0.0481315	0.0184705	0.0318312	0.0355633	0.0324193	0.0836254	0.0439407	0.0299058	0.0647014	-0.0299337	0
154.8	0.030149	0.0230727	0.0762826	0.0679347	0.0172241	0.0754055	0.100737	0.0388559	-0.0233989	0.0141195	0
155	0.0282109	0.0815871	0.0910062	-0.0208674	0.00279242	0.0119843	0.0919416	0.00350811	0.0576908	0.00842777	0
155.2	0.0131918	0.0316259	0.0327013	-0.0437677	-0.0395649	0.0201736	0.0547615	-0.0704476	0.0705798	0.0262682	0
155.4	-0.0161098	0.0269286	-0.0045603	-0.00802396	-0.0409358	-0.00320138	-0.0120944	-0.0531305	-0.00145961	0.00118456	0
155.6	-0.0354899	-0.0428765	-0.0239966	-0.037207	-0.0450919	-0.0170139	-0.0519379	-0.00250631	-0.0314353	0.00746684	0
155.8	-0.0418321	-0.0771169	-0.017595	-0.0564258	-0.0482628	-0.0168434	-0.0642753	-0.0105785	-0.0485018	0.00686343	0
156	-0.0219511	-0.072359	-0.00463277	-0.0187763	-0.0235605	-0.0194543	-0.0194579	-0.0160564	-0.0218232	-0.0118452	0
156.2	0.00690635	-0.0327338	-0.0133294	-0.0171592	-0.015756	-0.0249069	0.0289887	0.00974914	0.0051213	-0.00997462	0
156.4	0.0176419	0.0480555	-0.0136938	-0.0580054	-0.0514787	-0.01447	-0.00331588	0.0121371	-0.0362762	-0.00301205	0
156.6	0.0381859	-0.0323702	0.00583508	-0.0116015	-0.0412856	0.0264795	-0.00805789	0.0414603	0.0176152	-0.0213549	0
156.8	0.00384299	-0.0106847	-0.0717011	-0.0318347	-0.0327261	0.00868045	-0.0257411	0.0163725	-0.0472203	-0.0353673	0
157	-0.0659017	-0.019866	-0.0481871	-0.017117	-0.0162715	-0.0320398	-0.0649061	0.0152133	-0.0823621	-0.00840348	0
157.2	-0.0588512	-0.0467916	0.0173611	-0.0225915	0.0193684	-0.027152	-0.0512012	-0.0231244	-0.026774	-0.00604715	0
157.4	-0.0207894	-0.0123684	0.00257999	-0.0337798	0.0233251	-0.00622875	-0.0114328	-0.0672708	-0.00967261	-0.0105309	0
157.6	-0.0224791	0.0182422	-0.0327342	0.0165335	0.0134986	-0.0125972	-0.0162816	-0.040896	-0.0325193	-0.00598375	0
157.8	-0.00631791	0.0048032	-0.0149145	0.0277247	0.0504978	-0.0195857	-0.0182341	-0.0125697	0.0275886	-0.0482396	0
158	-0.0327481	0.0223879	0.0168207	0.0107471	0.0115163	-0.0251375	0.0194003	0.0332325	0.0559382	-0.00908174	0
158.2	0.0194964	-0.0277733	0.0106544	0.011961	0.00416869	0.0278478	0.0277757	-0.0342919	0.0429119	0.0167297	0
158.4	0.0454331	-0.0232955	0.016234	-0.0191579	-0.0129777	-0.00429957	-0.0283569	-0.037305	-0.0117373	0.0448004	0
158.6	0.0109084	0.0144577	-0.00466962	0.00469261	-0.0243965	-0.0374267	-0.0533201	-0.0034407	-0.0233737	0.0146737	0
158.8	-0.00543798	0.00134262	-0.0230276	0.0618758	-0.0057168	0.000914271	-0.0495732	-0.0149213	-0.00502221	-0.00264813	0
159	0.0149715	0.00212626	0.0197613	0.0281134	0.00153487	0.0223554	-0.0458367	-0.0102254	-0.0221887	0.0434593	0
159.2	0.0208015	0.0571951	0.0215044	0.00898598	0.0075086	0.0430311	0.0595994	-0.00758766	0.0169919	-0.040986	0
159.4	-0.00806388	0.0446704	0.0376984	0.0359865	0.01487	0.0136976	0.0750039	0.00441397	0.0556354	-0.00156654	0
159.6	0.0069421	-0.00746634	0.0257346	-0.0273082	0.0132727	0.00381355	0.0440906	0.0267025	-0.0426602	-0.0210781	0
159.8	-0.00105068	-0.0221465	0.0141767	-0.0279873	-0.0206301	0.00676789	0.0298096	0.055051	-0.0268556	-0.0300185	0
160	-0.0330565	0.00187144	0.0106546	-0.00669321	-0.020255	-0.027585	-0.00493901	0.0240726	0.00942203	0.00925554	0
160.2	-0.0319022	-0.00644526	-0.00789894	-0.0406149	0.0283916	-0.0263025	-0.0236745	0.0015795	-0.04805	0.0171689	0
160.4	-0.00796485	-0.0330117	-0.0304481	-0.00453153	0.0218799	0.0401604	0.0193846	0.0659841	0.0185891	-0.00133736	0
160.6	0.0268732	0.0372867	-0.0512966	0.0133375	-0.0203792	-0.0174774	-0.0159999	0.00145307	0.0555067	-0.0310728	0
160.8	-0.00403952	0.0245605	-0.0465399	0.00662439	0.0048621	0.0107519	0.0226505	0.00141903	0.00614164	0.0250543	0
161	0.0161937	-0.0295354	-0.00178355	0.00744217	0.0242127	0.00560568	-0.00184373	0.0207738	0.0205846	0.0692398	0
161.2	0.0182458	0.00103052	0.0204199	0.00389885	-0.00317528	0.00702228	-0.00962973	-0.0148552	0.0146546	0.0298645	0
161.4	-0.00446092	0.0362543	-0.0105134	-0.00682776	-0.030117	0.00516581	0.0120222	-0.0556008	-0.000792284	-0.0106247	0
161.6	0.000124453	-0.000288138	-0.0265112	-0.0131818	-0.0119504	-0.0612559	-0.0183559	-0.0350069	0.0276084	0.0070629	0
161.8	-0.042755	-0.000880456	0.00664892	-0.018492	0.0138854	-0.0554562	-0.0165802	0.00401704	-0.0256242	-0.00247419	0
162	-0.0234736	-0.0323617	-0.00566247	0.0046862	-0.0343839	-0.0112969	-0.0578935	-0.024485	-0.00687185	-0.0498494	0
162.2	-0.0135254	-0.0238653	0.013563	0.0299843	-0.0297251	-0.0131485	-0.0514511	-0.00563937	-0.00909735	-0.0261929	0
162.4	-0.00500383	-0.0151079	0.0397399	0.014584	-0.00081976	-0.0154594	-0.0410492	0.0281635	-0.0266569	-0.00943568	0
162.6	0.00935606	-0.0414153	0.0245551	-0.0194141	0.0166314	-0.00879558	-0.0403239	0.0015799	-0.0326645	0.000656425	0
162.8	0.00831419	-0.0323068	-0.00149246	-0.0228885	0.0182809	-1.81765e-05	-0.0210674	-0.0313817	-0.0238371	0.00165078	0
163	0.0152649	0.0208821	-0.009359	0.000321416	0.00552312	0.0268256	0.0296764	-0.0144249	-0.00519558	-0.0202966	0
163.2	0.0508704	0.00697962	-0.0160689	0.012611	0.015542	0.0279338	0.0983786	-0.014868	-0.0079262	0.0379008	0
163.4	0.0259325	0.034657	0.0423337	0.0202066	-5.55117e-05	-0.00643259	0.024486	0.0227893	0.000607837	0.0104326	0
163.6	0.007419	0.0231515	-0.00425846	-0.0229275	0.00730077	0.00587996	-0.0131704	-0.0233804	0.0228104	-0.0148646	0
163.8	0.00304699	0.00100827	-0.0356698	0.00590277	0.0551114	0.0101701	0.000588476	-0.00864586	-0.017	-0.00292626	0
164	0.00711144	0.0234836	-0.0142395	0.0625792	0.0259274	-0.00891539	-0.000256824	-0.000982868	-0.0310271	0.00905403	0
164.2	0.00840844	0.0246942	-0.00260655	0.0209035	-0.0350561	0.00298437	-0.00658612	-0.0343642	0.0270456	0.0255732	0
164.4	-0.0118078	-0.00501251	0.0482684	-0.00728856	0.0232035	0.0326292	0.0186892	0.0459192	0.025195	0.0269185	0
164.6	0.00176865	0.0752275	0.0593158	0.0709261	-0.00631939	0.0280795	0.0719374	-0.0259575	0.011219	-0.0508069	0
164.8	-0.0104457	0.0249435	0.0213223	0.00102063	-0.0138291	-0.0353346	0.0122518	0.0469305	-0.0188417	0.00105027	0
165	0.0103565	0.0122437	-0.00373097	-0.0629536	0.0206038	-0.0147493	0.0219456	0.0987582	0.0188157	0.00886122	0
165.2	0.000782357	0.0174291	-0.0166736	-0.0134644	-0.00198598	-0.00460235	0.0159657	0.0198667	0.0292441	-0.0165278	0
165.4	-0.0209868	-0.0158911	-0.0162851	0.0135331	-0.0287784	-0.0234481	-0.0309187	-0.0148542	-0.00531197	-0.00450022	0
165.6	0.0166007	0.000970503	0.00508737	-0.0288045	0.01056	0.0119937	-0.0129396	0.0371167	0.0190897	-0.0102308	0
165.8	0.0144685	0.0240087	-0.00215537	-0.0151314	0.0015983	0.00772674	-0.0312889	0.0030626	0.0522054	-0.0175813	0
166	-0.00137611	-0.022255	-0.028991	-0.0330301	-0.0043235	0.0304439	-0.0133577	0.0165313	0.041977	-0.00950851	0
166.2	-0.00525199	0.0014032	-0.0137783	0.027875	-0.00653157	0.0261828	-0.00395318	0.0301333	0.0118923	-0.00919586	0
166.4	-0.00725173	0.0113461	0.00974834	0.0199036	0.0107176	0.019306	0.0166615	-0.0085638	0.00754231	0.00336852	0
166.6	-0.00892651	0.0131232	0.0393284	0.0429468	0.0301948	0.0233591	0.0322064	-0.0273856	0.0133926	0.0308693	0
166.8	0.000305204	0.0159961	0.0459078	0.0837148	0.0247885	0.0333436	0.0115383	0.00205086	0.0125883	0.0326188	0
167	0.0128188	-0.0470198	-0.00689551	-0.0198881	0.00613402	0.0341803	0.000101728	-0.00250437	0.0133133	-0.00422504	0
167.2	0.00773103	-0.0596327	-0.0251043	0.00981231	0.00228158	-0.0270858	0.0284798	-0.0324173	-0.0126422	-0.0178816	0
167.4	-0.000248471	-0.0205435	-0.0359133	-0.0292753	0.0308847	-0.0527226	0.0182279	0.00982477	-0.0443722	0.0282413	0
167.6	0.0171408	-0.0177146	0.0230185	-0.0170271	-0.0180697	0.0130332	0.0491454	-0.010816	-0.0416291	0.0536852	0
167.8	0.0133562	0.0253305	0.0254247	0.00218353	-0.0372702	0.011191	0.0168877	-0.0418224	-0.0219086	0.0239668	0
168	-0.0108445	0.048929	-0.0260227	-0.00810586	-0.00550821	-0.0228798	-0.0319018	-0.0211834	-0.00546771	0.00419869	0
168.2	-0.022429	-0.0133167	-0.0199843	0.00124944	-0.00795685	0.0051876	-0.00563265	-0.00811198	0.00964358	0.00167448	0
168.4	-0.0288408	-0.00473013	0.00187944	-0.0129548	-0.00560317	-0.0242455	-0.017474	-0.00813344	0.00792515	-0.0310581	0
168.6	-0.00307169	0.0457433	0.0156948	-0.0366812	-0.0012034	-0.0591897	-0.0114539	0.0211866	-0.0215412	-0.00413949	0
168.8	0.00799824	-0.0183136	-0.017942	0.00129505	-0.0252053	-0.0270005	-0.0122211	-0.0192047	-0.0107903	-0.016641	0
169	0.00714031	-0.0299502	-0.0228033	-0.0196134	-0.019939	0.00272863	-0.0172999	0.00739295	0.00585947	-0.0169389	0
169.2	0.0198628	-0.00785077	0.00404817	0.0205434	-0.00428566	0.0139352	-0.00579413	0.00707138	-0.0112922	-0.0190683	0
169.4	0.0135185	-0.0133553	-0.00162032	0.0566942	-0.00879667	0.00325252	-0.00431716	0.0044889	-0.00838625	-0.0322043	0
169.6	-0.0110798	-0.00771657	-0.0266839	-0.039723	0.00155699	-0.00426512	-0.0228054	0.0795792	0.017887	-0.0125365	0
169.8	0.0174154	-0.0275463	-0.00699601	0.000209753	0.0378981	0.0550764	-0.0031275	0.00421053	-0.0103796	0.00381628	0
170	0.00809855	0.0134228	0.00730418	0.00565175	0.0639982	0.0180797	0.0162052	-0.00321212	0.0485195	0.00957852	0
170.2	0.0241479	0.0117962	0.0291962	0.00363631	0.0664045	0.0200564	-0.00369105	-0.0134917	0.0464708	-0.0101704	0
170.4	-0.017623	0.00975199	0.0160056	-0.0145034	0.0445895	-0.0167212	-0.0160597	-0.00915588	-0.0215265	-0.00743363	0
170.6	-0.0687971	-0.00662868	-0.00341769	-0.035639	0.0294568	-0.0544132	-0.0129417	-0.018722	-0.0480745	0.0213138	0
170.8	-0.0331148	-0.0380181	-0.0147008	-0.0245924	0.00925774	-0.0157359	-0.0114775	-0.0420547	-0.0294627	0.0232468	0
171	0.0100874	-0.0141381	-0.0453631	0.0032518	-0.0393618	-0.000772325	0.0125661	-0.00788689	-0.0347724	-0.0126433	0
171.2	-0.00445435	-0.0308399	-0.0124594	0.0184089	-0.050782	-0.0156186	0.0222224	-0.0067158	-0.0451328	-0.0290994	0
171.4	-0.0357326	-0.0622978	0.00535325	-0.0359368	-0.0831254	-0.0133284	-0.0999659	-0.00682436	-0.0472815	0.00787643	0
171.6	-0.0383554	0.0325591	-0.0182826	-0.0649532	-0.0805548	-0.00447177	-0.0320615	-0.0426247	-0.025185	0.0222204	0
171.8	-0.0258866	0.0434988	-0.000318729	-0.00703593	-0.0662428	0.0106373	0.0565431	-0.0354597	0.00472888	-0.00925451	0
172	-0.0173346	-0.0400358	0.0182181	0.0459408	-0.0725677	0.0252873	0.00216829	0.0281685	-0.00458531	-0.00709866	0
172.2	-0.0167927	-0.0228385	0.015946	0.0169389	-0.0542369	0.0142615	-0.0282206	0.0332064	-0.0225535	0.0347428	0
172.4	-0.00772765	0.00992078	0.0768588	-0.0083869	-0.0137168	-0.0229071	0.0121414	-0.0185745	0.0400457	0.0144971	0
172.6	0.0503271	-0.00973195	0.020301	0.0289855	-0.0517518	-0.0441013	0.0323078	0.0159539	0.092052	-0.0155026	0
172.8	0.0204753	-0.033213	-0.0165106	0.0384461	-0.0553919	-0.0019137	0.0180329	-0.00645392	0.00256367	-0.00177776	0
173	-0.0214958	0.0105204	-0.0102846	0.0345638	-0.0342557	0.0202143	-0.0039481	0.0162322	-0.0105164	-0.000655257	0
173.2	-0.00757326	0.00728894	-0.0104317	0.0393302	-0.0342318	0.0175075	0.0301077	0.0207764	0.0309957	-0.0219337	0
173.4	0.0214158	-0.0234586	-0.0208121	-0.00877286	-0.0174651	0.0286348	0.0404377	-0.0198417	0.0221123	-0.0053929	0
173.6	0.032093	0.0317963	-0.0235259	-0.0760451	0.0137486	0.0110285	-0.0247063	-0.00031715	0.0102734	0.0310486	0
173.8	0.0375978	0.0271957	-0.00948954	-0.0150332	-0.0187929	-0.0385417	0.00810826	-0.00213308	-0.0166754	-0.00324946	0
174	0.0337057	0.0103062	0.0354989	-0.00765308	0.00855896	0.0284581	-0.00923424	0.0265103	0.00448366	-0.0205999	0
174.2	0.0534188	0.0122904	-0.0128814	-0.029032	-0.0218104	0.0355113	-0.0135803	0.00365544	-0.0285673	-0.034133	0
174.4	0.0270341	0.0152023	-0.0190752	-0.0524941	-0.0140577	0.052111	-0.0112046	0.0471918	-0.00182993	-0.0390096	0
174.6	-0.0127312	0.0167917	0.0357816	-0.0594574	0.0653068	0.0456574	0.0172646	0.0302776	0.014916	-0.0142393	0
174.8	-0.00791553	0.0292238	0.0310695	-0.0358623	0.100392	-0.0183935	0.0282733	-0.0553832	-0.04591	-0.00221391	0
175	-0.0181996	0.0205746	0.000981198	-0.0101714	0.0843523	0.00205466	-0.034626	0.0210329	-0.010542	-0.0284882	0
175.2	-0.0320865	-0.0326922	0.0154776	0.0122419	0.0940937	0.00459109	0.019217	-0.0107924	0.0491172	-0.00120672	0
175.4	0.0107442	0.0190613	0.00546788	0.0615914	0.056579	-0.0272026	-0.00455366	0.0118433	0.0299973	0.0153712	0
175.6	0.0208062	0.0264282	-0.00733436	0.0192577	0.0196337	-0.0348708	-0.0284501	-0.0218998	0.0213062	0.0169453	0
175.8	-0.00630526	-0.0166676	-0.00805008	-0.00970677	0.033277	-0.0210915	0.00405236	-0.0326829	-0.00555685	0.0162141	0
176	-0.0176411	-0.0195259	-0.0186643	-0.00725128	0.027533	-0.01842	0.0245077	-0.000456962	-0.0167543	0.0220603	0
176.2	-0.018708	-0.0170064	-0.0296139	-0.0103726	-0.0105226	-0.0212993	0.0144953	-0.0205019	-0.000407933	0.0459511	0
176.4	-0.0359649	-0.0334319	-0.0116	0.0754278	0.0115777	-0.00931759	0.0208605	-0.0165054	-0.0598442	0.0566878	0
176.6	-0.0455054	0.0376141	-0.00612683	0.0133855	-0.0226389	-5.76161e-05	-0.00708519	-0.0241308	0.0379294	-0.00793632	0
176.8	-0.0131378	-0.028804	-0.0111739	-0.0380842	-0.0383036	-0.0188502	-0.044433	-0.00441019	0.0495138	-0.025939	0
177	-0.00847153	-0.0398746	0.00597009	-0.0221233	-0.0344052	-0.0382138	0.00465648	-0.00885804	-0.0332208	-0.00445582	0
177.2	-0.0125887	-0.0148106	-0.00229564	0.0267451	-0.0192429	-0.0125155	0.0223412	0.0084701	-0.0406216	-0.00908979	0
177.4	0.0278301	-0.0228319	-0.037378	0.0558959	-0.0122532	0.01337	-0.00496992	0.0327322	0.0156636	-0.0195472	0
177.6	0.0510577	0.0220848	-0.0125686	0.0289229	-0.0217321	-0.00556636	0.0315043	0.00467172	0.0170901	0.00818316	0
177.8	0.00144188	0.00126904	0.0422199	0.00480942	0.00334151	0.0143966	-0.00986995	0.0423874	0.00626964	0.0243211	0
178	0.00356793	0.0393353	0.00742604	0.0360736	-0.04204	0.0182798	-0.00987017	0.0153636	-0.0151921	0.00194463	0
178.2	-0.0289939	0.0293883	-0.00510018	0.0365583	-0.0706796	-0.0162481	-0.0403999	0.0101775	0.0434435	-0.00998969	0
178.4	-0.0470683	-0.05241	0.0170082	0.025506	-0.04387	-0.0308351	-0.038246	0.0371417	0.00490129	-0.00135606	0
178.6	-0.0161363	-0.0471054	-0.0068979	-0.00154904	-0.0193274	-0.00435187	-0.00261596	0.0427138	-0.0399715	-0.0127791	0
178.8	0.00368391	0.0294863	-0.0538827	-0.0477789	-0.00600717	0.0129782	-0.00117647	-0.0172892	0.0203325	-0.0398483	0
179	-0.0129895	8.81681e-05	-0.029164	-0.0183041	0.0209016	-0.00434961	0.0117214	-0.0987857	-0.000694278	-0.0255723	0
179.2	-0.0486302	0.00682528	0.0167253	0.0523978	-0.00615673	-0.00866775	0.0402594	-0.0315313	0.0244976	0.00825331	0
179.4	0.000969452	0.00393179	-0.00547686	-0.0352553	-0.00440748	-0.00187014	0.0275393	-0.00751123	-0.033837	-0.00571988	0
179.6	0.0210383	-0.0137846	-0.0245905	-0.0573967	-0.004706	-0.0368698	0.0130512	-0.0388028	-0.0613424	0.00580503	0
179.8	0.0374636	-0.0117987	0.0404134	0.00288784	0.0239985	0.00906378	-0.00616688	0.0149341	-0.000354521	0.0550299	0
180	0.0647092	0.00272158	0.0824749	0.0118136	0.0949851	0.0833139	-0.00670348	0.0590824	0.0266427	0.0551847	0
180.2	0.0384146	0.0418402	0.0188405	-0.0229149	0.0850171	0.0399415	0.0136709	-0.0161665	-0.0262658	0.00814281	0
180.4	0.0235558	0.0948872	0.00245601	-0.0525536	-0.0384074	0.0155315	-0.0339528	-0.0205974	-0.0278263	0.0119791	0
180.6	0.0229908	-0.0345446	0.0286168	-0.0590593	-0.0239927	-0.00612577	-0.0552069	-0.0135228	0.0212636	-0.00694548	0
180.8	-0.0164616	-0.0354101	-0.00946177	-0.0403798	-0.0214893	-0.0394741	-0.0480934	0.021229	0.0238416	-0.00963447	0
181	-0.0230023	-0.0105748	-0.00918007	-0.00458374	-0.0383688	-0.0438905	-0.0351031	0.00300047	0.0198408	-0.0151461	0
181.2	-0.00823654	-0.0143682	-0.00195261	-0.00971991	-0.0320743	-0.0234825	-0.0340388	-0.0137795	-0.030866	-0.0257061	0
181.4	-0.0182868	0.032126	-0.0334813	-0.00940625	-0.0140549	0.0102281	-0.00719448	0.00404131	-0.0492525	-0.0190566	0
181.6	-0.0171268	0.0456279	-0.0289478	0.0494841	-0.000702504	0.0341251	0.0589148	-0.0181204	0.0409295	-0.00761838	0
181.8	-0.0175368	-0.00660438	-0.0548359	0.0074734	-0.0161394	-0.023071	0.0420987	0.00741362	-0.0305275	-0.00109753	0
182	-0.0558245	0.0371986	-0.0626339	-0.0128469	-0.0176296	-0.0309102	-0.0253822	0.0438948	0.0255865	0.0120332	0
182.2	-0.0157558	-0.000794442	0.043561	0.0156152	-0.0325651	-0.0274743	0.0202573	-0.0027335	0.0281776	0.0163323	0
182.4	0.047822	-0.046189	0.0947996	0.0180353	-0.0416289	-0.00433994	0.033911	-0.0130544	-0.0184244	-0.00339007	0
182.6	0.0380273	-0.00560713	0.0373234	0.0226896	-0.0123142	0.055914	0.00607132	0.0273939	0.0303434	-0.00452605	0
182.8	0.00522764	0.036184	0.00729021	0.0442048	0.00684903	0.0568652	0.0391128	0.0246604	0.0628734	0.0184101	0
183	0.0180275	0.0285333	0.0230888	-0.0111266	-0.0313611	-0.0376908	0.0296543	0.00832214	-0.0350723	0.00158009	0
183.2	0.0127063	0.000118094	0.0237376	-0.0447444	-0.0346273	-0.0195464	0.0200322	-0.0198203	0.0182506	-0.00222114	0
183.4	0.0464413	0.0551376	-0.0268601	0.0405117	-0.0330583	0.0289113	0.0162969	0.0234704	-0.0302922	0.0446606	0
183.6	0.0357069	0.0225711	0.00615584	-0.0147306	-0.0479617	0.0464712	0.00585213	0.0160393	-0.0499397	-0.0048563	0
183.8	0.0118612	-0.0221563	0.0416645	-0.0652114	-0.0384273	0.0143248	-0.0191782	0.0266391	-0.00792724	-0.0692638	0
184	0.0189007	9.80476e-05	0.0120319	-0.00706687	-0.0224903	1.38179e-05	-0.0305913	0.0216074	0.0525837	-0.0472508	0
184.2	0.0224184	0.0104375	0.00158258	-0.0138005	-0.0519174	0.0554057	0.00491595	-0.0498822	0.0881307	-0.013691	0
184.4	0.0381896	0.0374377	-0.0101165	0.00303198	-0.0679158	0.0664693	0.0364385	0.051999	-0.0295875	0.00976145	0
184.6	0.0190368	-0.0334247	-0.00374613	0.0273806	-0.0300557	0.0110336	-0.0268625	0.0402545	-0.0150218	0.0219027	0
184.8	0.0192835	3.45485e-05	0.00839739	-0.00443419	-0.0600068	0.0267485	-0.0345036	0.00102122	0.00869355	0.0167037	0
185	0.0516343	0.0443496	0.0694034	0.00658072	-0.0764806	0.0657704	0.00629812	0.0317525	0.0205885	0.0220612	0
185.2	0.0602801	0.0144344	0.0817589	0.0354883	-0.0528624	0.0807195	0.0647305	0.0466626	0.0441313	0.00247102	0
185.4	0.0489051	0.0230714	0.0313757	0.000840669	-0.0513907	0.0813694	0.0719844	0.0312299	0.028963	-0.00680933	0
185.6	0.0639377	0.0761791	0.0283925	-0.0258559	-0.0765342	0.0483677	0.0167667	0.0355982	-0.0246333	0.0561435	0
185.8	0.0476469	0.0122236	-0.0422566	0.00961395	-0.132275	0.0137694	0.108657	-0.0485663	-0.0417856	0.0446541	0
186	0.0236118	0.0081709	-0.0112656	0.0571266	-0.112243	0.0389671	0.0470188	0.0144025	-0.0409445	0.0646723	1
186.2	0.087859	0.157978	0.0829019	0.0960036	0.00104008	0.113134	0.118411	0.0939492	0.102209	0.0776844	1
186.4	0.164594	0.186129	0.0986184	0.0872032	0.0548249	0.122275	0.154986	0.0988522	0.18585	0.124382	1
186.6	0.153029	0.118681	0.0856842	0.0671057	0.037038	0.0991716	0.160462	0.0968399	0.131494	0.149792	1
186.8	0.121765	0.126409	0.120178	0.0577531	0.0389217	0.116866	0.233152	0.117732	0.0919228	0.084845	1
187	0.154506	0.0640291	0.0986282	0.0138861	0.0226148	0.0901183	0.0823017	0.107331	0.0876853	0.0894264	1
187.2	0.13369	0.103949	0.067033	0.047506	0.00488709	0.0642011	0.0961023	0.072967	0.171341	0.186071	1
187.4	0.140507	0.1189	0.126041	0.0283592	-0.0299066	0.0691284	0.127155	0.0782255	0.194386	0.129127	1
187.6	0.113184	0.0823832	0.112479	0.0488643	0.00493107	0.0661014	0.108974	0.0791416	0.143186	0.106516	1
187.8	0.0394838	0.0161691	0.0366503	0.0228665	0.0139198	0.00997779	0.0830041	0.0501987	0.0821523	0.0988613	1
188	0.0105402	0.00405204	0.0201411	-0.0660625	-0.0346967	-0.021243	0.0669816	0.0124402	0.019834	0.0347052	1
188.2	0.0416257	0.0618124	0.0227671	-0.0265388	-0.0455343	0.00244569	0.0554969	-0.0122207	-0.00772257	0.0383731	1
188.4	0.0444874	0.0242775	-0.00160884	0.061585	-0.0897866	-0.0470505	0.0379721	-0.00304571	0.0622867	0.0591021	1
188.6	0.0262826	0.035492	0.0591296	0.0270641	-0.0642587	0.0250945	0.00920039	0.0207107	0.0257992	0.0517126	1
188.8	0.0139819	0.0425204	0.0388724	-0.0219143	-0.0151074	0.0121128	-0.0147919	0.0453856	0.0462891	0.0389543	1
189	0.0133912	-0.014797	-0.0479976	-0.0467011	-0.0297722	-0.0310221	-0.00917868	0.0372465	0.0462063	0.0345334	0
189.2	0.0210451	-0.0246867	-0.0548261	-0.0326802	-0.0303897	-0.0322234	-0.00795298	0.0122922	0.0206081	0.00689686	0
189.4	0.0200867	0.038518	-0.00978059	-0.0130488	-0.0242912	-0.0362193	-0.0426809	0.00907342	0.0271017	-0.0168616	0
189.6	-0.00574738	0.0459041	-0.0320511	-0.0444617	-0.0944916	-0.0232487	-0.048198	0.00564132	-0.00164165	0.0113862	0
189.8	-0.0262667	0.06535	-0.0240694	-0.0137381	-0.0232124	-0.00492185	0.0189371	-0.0278465	0.0280258	-0.000485537	0
190	-0.0100786	0.0697265	-0.00399356	-0.0273352	-0.0404317	0.00690689	-0.0156537	-0.0189763	0.0191315	0.00720222	0
190.2	0.0156566	0.0136143	-0.0143192	-0.0492413	-0.0466042	0.0108089	-0.0389318	0.0234749	0.00419718	-0.00400605	0
190.4	-0.00249531	0.0219516	-0.00895106	-0.0205829	-0.0520868	0.0307582	0.0179357	0.0543261	0.0493173	-0.00137182	0
190.6	-0.0244699	0.0369652	0.00922331	-0.00893099	-0.0607086	0.0157582	0.0288514	0.0375422	0.0537672	-0.000176887	0
190.8	-0.00935762	-0.0168641	-0.0124354	-0.0551945	-0.0315014	-0.0174921	-0.0288903	0.00184601	-0.0221681	-0.0193673	0
191	-0.0154309	0.0389444	-0.0295072	-0.0429953	-0.0487874	0.0450569	0.0183494	0.0128027	-0.00013339	0.0309189	0
191.2	0.000718105	0.0116455	0.00481346	0.0282698	0.00137669	0.0209401	0.0794482	0.00572587	0.0316876	0.0403362	0
191.4	-0.00937199	-0.0305321	0.00983895	-0.016368	-0.0100175	0.0317579	-0.0154663	-0.0255971	-0.0263179	-0.000292291	0
191.6	-0.0212764	-0.0743866	-0.0642337	-0.0685425	-0.0266414	0.010222	-0.00548881	-0.00115762	-0.018235	-0.0345161	0
191.8	0.00259122	-0.0443952	-0.0790677	-0.0300271	-0.0349919	-0.0133035	0.0221267	0.019507	-0.0287176	-0.00507681	0
192	0.017274	0.00605319	0.00773583	0.0303048	-0.0289007	-0.00737917	-0.0248523	0.00685463	-0.0528301	0.0186988	0
192.2	-0.0321481	-0.0400144	0.0139094	0.0288107	0.00996558	-0.0445982	0.00441767	0.00788241	0.0195175	-0.0165709	0
192.4	-0.0666316	-0.00861376	-0.0681537	-0.0226758	-0.0319207	-0.0423766	-0.0551711	-0.0485772	-0.0675934	0.0201203	0
192.6	0.0181499	0.00483603	0.0249708	-0.0296289	0.00443822	-0.0375442	-0.00198296	-0.0186331	0.00593433	-0.00974022	0
192.8	-0.0151349	0.00878911	0.052283	0.00590452	-0.0327643	-0.0259837	-0.0399623	-0.00733686	-0.0262643	-0.018217	0
193	-0.0266899	-0.0260052	0.0406215	0.0259637	-0.0384863	-0.0214604	-0.0345486	0.0037816	-0.0111954	-0.00584122	0
193.2	-0.000192137	-0.026025	0.0383183	0.0132888	0.00515039	-0.0310965	0.0470753	0.00503002	0.0297483	-0.0048469	0
193.4	-0.011836	0.0373234	-0.00587233	-0.00687757	-0.00893564	-0.0188497	0.0485432	-0.0175632	-0.0297796	-0.00704136	0
193.6	0.0529832	0.0379153	-0.025522	-0.0228209	-0.0115855	0.01585	0.00692014	0.0103262	0.0340921	-0.0202961	0
193.8	0.000766874	0.0416216	-0.049528	-0.0354147	0.00235459	-0.0100707	-0.0686096	-0.0130865	0.0576284	-0.0154511	0
194	-0.0137635	0.00146208	-0.0857625	-0.0144637	0.0394679	-0.0249565	-0.0586326	-0.0220331	0.029481	-0.00558876	0
194.2	-0.0117815	-0.000941472	-0.0198906	0.0329928	0.0396632	-0.0144165	-0.000816661	-0.0032131	0.00573884	-0.0302338	0
194.4	-0.0226301	-0.0201322	0.015292	0.012386	0.0287158	0.0328822	-0.00178103	0.0335316	-0.00606419	-0.0068714	0
194.6	-0.0228456	-0.0271576	0.00618946	-0.0156512	0.0164702	0.0476281	0.017456	0.0263251	-0.0125928	0.0344878	0
194.8	-0.00286674	0.0384195	0.0482511	0.0418263	-0.00554906	-0.00310046	0.0808367	-0.0198467	0.013865	0.00708243	0
195	0.0352402	0.00795453	-0.00747139	0.0504365	0.0265849	0.0162418	0.0133111	0.0196285	0.0596707	0.0156858	0
195.2	0.0421534	-0.0201086	-0.0150779	0.0484404	0.0366125	0.0463884	0.0717755	0.0307214	0.00870755	0.0195685	0
195.4	0.0245536	0.00938305	0.000401622	0.0370312	0.0319072	0.0594381	0.0598529	0.048543	-0.0198805	0.0257435	0
195.6	0.00809297	0.0311415	0.0739739	0.0110689	0.0464783	0.0254474	0.00070283	0.0221834	-0.000666672	0.00384145	0
195.8	0.0312614	0.0363567	0.0497691	-0.00251587	0.0301814	-0.00544408	-0.00286343	0.000265398	-0.00655426	-0.00841108	0
196	0.056924	0.034326	-0.0243643	0.00128962	-0.0100835	0.0119998	0.0155116	0.00306206	-0.0287547	-0.00333137	0
196.2	0.0253449	0.00314782	0.0691344	0.00213376	-0.000661215	0.0229218	0.00309839	-0.0182201	-0.00905348	-0.0227249	0
196.4	0.0214589	0.00727056	0.0381885	0.00997092	-0.00402371	0.012283	-0.016182	0.0450524	0.00648986	0.00698245	0
196.6	0.04028	0.0509563	0.0185043	-0.0174762	-0.00603704	0.0667689	-0.0193881	0.0061584	0.0270345	0.0113529	0
196.8	-0.0450276	-0.0439913	-0.0460126	-0.0556896	-0.0402158	0.0192491	0.00952954	-0.0352226	0.000891654	-0.0024403	0
197	-0.102162	-0.0598843	-0.0500564	-0.0740556	-0.0578112	-0.0292293	-0.0128702	-0.0313649	-0.0114456	-0.0292824	0
197.2	-0.0343916	0.0106605	0.0153599	-0.0528324	-0.0424854	0.0137167	-0.0421783	-0.0468908	0.00314662	-0.0163152	0
197.4	0.031538	-0.0163716	0.0135505	-0.00167505	-0.0110555	0.024861	0.0198918	-0.0584962	0.0116854	0.0236681	0
197.6	0.0180883	-0.010504	-0.00792826	0.03002	0.0277823	-0.0218419	0.0745336	-0.0133677	0.0324095	-0.0136193	0
197.8	0.0136229	-0.00146424	0.0284035	0.0182015	-0.0380081	0.00332663	0.0215696	-0.0281298	-0.00944388	-0.011361	0
198	-0.0149611	-0.0155374	-0.0285673	-0.0190542	-0.0500214	-0.0290911	-0.050519	0.0275973	-0.0131759	0.0242635	0
198.2	-0.0144924	-0.00227557	0.0038078	-0.0123853	0.0187682	-0.0302481	-0.0504548	0.0441772	0.00233118	0.0195332	0
198.4	-0.000587976	-0.00922297	0.0344707	0.0449662	0.0309313	0.00022512	-0.00661187	0.0283976	-0.022348	0.0298964	0
198.6	0.0162253	0.000578735	0.0164461	0.032187	-0.010353	-0.00410721	0.0341221	0.0559485	-0.0187432	0.0379831	0
198.8	0.0428574	0.0842745	0.0460352	-0.0626152	0.00824863	-0.00132813	0.0224547	0.0506005	0.0405498	-0.0213353	0
199	0.00448957	0.0738313	-0.0454767	-0.0344116	0.033957	0.0250354	-0.0543057	-0.0190773	0.0103648	-0.0287568	0
199.2	-0.013873	0.0115427	-0.0213409	0.0213615	0.0373097	-0.00883873	0.0443779	0.00827557	-0.00478326	-0.0325869	0
199.4	-0.0349395	-0.0481288	-0.0473104	0.0212853	-0.0114345	-0.0453879	-0.0343554	-0.0368757	0.000750062	-0.0476828	0
199.6	-0.0219683	-0.0272723	-0.0183396	0.0659918	-0.00454519	-0.0284525	-0.0742477	-0.0489456	-0.00550303	-0.0296065	0
199.8	0.0278388	-0.000948	0.0371213	0.0847442	0.0436421	-0.00156308	-0.015562	0.010914	-0.0380685	0.0201788	0
200	0.0390661	-0.0218052	-0.00182329	0.00252944	0.017035	-0.011481	-0.0567775	0.0297157	-0.04155	0.0270069	0
200.2	0.0023981	0.00861296	-0.0212737	-0.0413142	-0.0191464	-0.00521762	-0.0519821	0.00724056	0.0208499	-0.019364	0
200.4	0.00260172	0.0416444	0.000184576	-0.0306267	0.0736774	0.0513558	0.109603	-0.0140068	0.0294261	-0.00404166	0
200.6	-0.0294722	-0.00144566	0.0139606	0.0188884	0.0406151	-0.00524952	0.0528849	0.0246452	0.00319335	0.0052088	0
200.8	-0.0244006	-0.0399579	0.00145512	0.00149782	0.00352976	-0.047707	-0.0283267	-0.0338908	-0.034346	0.01414	0
201	-0.0069727	-0.0594147	-0.011243	-0.0293213	-0.0365554	-0.0375776	-0.00733442	-0.040237	-0.00559197	0.0224263	0
201.2	-0.0169861	-0.0498948	-0.0244312	-0.0211831	-0.0533345	-0.0495485	-0.0270879	0.0177728	0.0298784	0.00104844	0
201.4	-0.0376463	-0.0228446	-0.0422501	-0.0229134	-0.0209874	-0.0798279	-0.097601	-0.0391158	-0.0138191	-0.0333884	0
201.6	-0.0717063	-0.0642471	-0.0374376	-0.039509	-0.0800813	-0.0879939	-0.0625467	-0.0920637	-0.0360353	-0.0175147	0
201.8	-0.067457	-0.0835802	-0.0442577	-0.0431943	-0.0495521	-0.104113	-0.0491401	-0.045827	-0.0446035	0.031207	0
202	-0.0172673	-0.0340214	-0.0543326	-0.0272249	-0.0391023	-0.01228	-0.0282111	-0.0288231	-0.048528	-0.0224813	0
202.2	0.0073914	-0.0221236	-0.0536445	-0.019105	-0.0742918	0.0302117	-0.00483643	-0.00385956	0.00212509	-0.00144207	0
202.4	-0.00307972	-0.0143566	-0.0229446	0.00249625	-0.033757	0.0399539	0.023182	0.0237359	0.0471197	0.0570294	0
202.6	-0.00882307	0.0495945	0.0306075	0.016509	0.028562	0.0704745	0.0535864	0.0249936	0.0186458	0.0312253	0
202.8	0.0101906	0.0768108	0.0472081	-0.0225631	-0.00501167	0.0408899	0.0628527	0.0240311	-0.00956505	-0.00174218	0
203	0.0386406	0.0252546	-0.00554666	-0.0355356	0.0173678	0.0308303	0.0488444	-0.00645312	0.0185967	-0.0180586	0
203.2	-0.00590859	0.0232665	-0.0223556	-0.00801473	0.0190403	0.0465241	-0.022444	-0.00629435	-0.0232616	-0.0175005	0
203.4	0.0149934	0.0104286	-0.000739177	0.00215829	-0.00543929	0.0365304	0.0298531	0.0182734	0.000109212	0.00623464	0
203.6	0.0410824	0.0248598	0.0160002	0.0421778	0.000865908	0.0117594	0.0358668	0.0240111	0.0348628	0.0139857	0
203.8	0.0122276	0.0301637	0.0350792	0.0393057	0.0406605	0.00234997	0.00138207	0.00437427	0.0284899	0.0154044	0
204	0.00188906	-0.0182124	0.0639952	0.0117428	0.0582991	0.00294754	0.0420723	-0.0130917	0.011079	0.0198453	0
204.2	0.0276747	-0.0109477	0.0554189	0.102073	0.0533959	0.00519224	0.0162609	-0.0197706	-0.0202174	0.00233413	0
204.4	0.0217244	0.0503213	0.0194103	0.0698568	0.0849054	0.0238867	-0.0244336	-0.0207928	-0.00197938	0.0203131	0
204.6	0.0190765	0.0791462	0.0720379	0.0377474	0.0297045	0.022414	-0.0130019	0.0352483	-0.000434955	0.00357707	0
204.8	0.0204889	0.0399781	0.0247466	0.00833229	0.0389774	0.0071878	0.0285246	0.0659079	0.00410509	-0.005177	0
205	-0.00579037	-0.0181169	-0.0104372	0.00869215	0.0544857	-0.00466399	0.00769459	0.013242	0.0046105	-0.00405521	0
205.2	-0.0181342	-0.0201529	-0.000892189	0.0111057	0.0143196	0.0072967	-0.00636353	-0.0190282	-0.0285404	-0.0129744	0
205.4	0.00888559	0.0080196	-0.0421674	-0.0157916	0.000405277	0.0202659	0.0318498	0.0274365	-0.0313164	-0.0101131	0
205.6	-0.0105228	-0.0173831	0.00787714	0.00182385	-0.0206692	-0.0158931	-0.0242416	0.0202499	0.0359934	0.01318	0
205.8	-0.0357639	-0.00700902	-0.0509675	-0.0686766	-0.0364314	-0.0228428	0.0022641	-0.0184878	-0.026702	0.0374903	0
206	-0.00101265	-0.0602244	-0.0617881	-0.0661757	-0.0599159	-0.0497612	-0.0165005	-0.0459777	-0.019373	0.00320677	0
206.2	0.00329461	-0.0678476	-0.0624524	-0.00960398	-0.0531572	-0.0511269	0.000959582	-0.0204437	0.016284	-0.0277183	0
206.4	-0.00740214	-0.0120907	-0.0257958	7.105e-06	-0.0232545	-0.0258817	0.0153844	0.0183159	0.0158317	-0.053954	0
206.6	0.0227489	0.0167141	0.0241797	-0.0078904	-0.0135221	0.00617868	-0.0198931	0.0404625	-0.00947494	-0.0466529	0
206.8	0.0222283	0.00696178	-0.00673489	0.00708618	-0.0245463	0.0286957	-0.00909399	0.0383324	-0.027902	0.0303694	0
207	-0.0249167	-0.0308354	0.0471757	-0.035094	-0.0294313	-0.0293034	-0.0265608	-0.0394034	0.0404213	0.00728694	0
207.2	0.00967599	-0.0171252	0.0089151	-0.0373391	-0.0140074	0.00952804	-0.0222519	-0.0212096	-0.00160195	-0.0466168	0
207.4	-0.00424971	0.00665166	-0.00134562	-0.0116669	0.00390166	0.0547033	0.0165221	0.00619542	-0.0466732	-0.00747272	0
207.6	-0.0107795	0.0362908	0.0372094	0.0226918	0.00952172	0.0590339	0.0185167	0.000551084	0.000323901	0.0221675	0
207.8	0.00715373	0.0357082	0.0310261	0.0322301	-0.0198915	0.029683	-0.0128978	0.0037627	0.0594598	-0.00762905	0
208	-0.0193186	-0.0047657	-0.0334125	-7.53168e-06	-0.0442673	-0.0270226	-0.0104483	0.0264877	0.049618	0.00421002	0
208.2	-0.0317403	0.00402899	-0.061627	-0.0119732	-0.000209422	-0.0513162	0.0136556	0.036561	0.0104159	0.0504793	0
208.4	-0.0226116	0.0292852	0.0176745	0.0166859	0.00244752	-0.00902523	0.00253936	0.00390519	-0.0151505	0.0106647	0
208.6	0.0131045	0.00555628	0.0173002	-0.021868	-0.02916	0.0142107	-0.026154	-0.0327066	-0.00223534	0.0166051	0
208.8	0.00401146	0.0103856	0.000389183	-0.00455766	-0.00220708	0.00396893	-0.0170233	-0.0234774	0.018151	0.0128864	0
209	-0.00620007	0.0038991	-0.0320696	0.0184262	0.022745	-0.0168067	0.0191687	-0.0514783	-0.00159821	-0.0135607	0
209.2	0.0140789	0.00561893	-0.0437553	-0.00580966	-0.00059479	-0.0285579	-1.72156e-06	-0.067049	-0.0195915	-0.0036884	0
209.4	0.0051316	0.0313409	-0.00502472	-3.07741e-05	-0.00814071	-0.0181079	-0.06235	0.00351757	0.00400747	0.0134274	0
209.6	-0.0127976	-0.056818	-0.0598665	-0.000480715	0.00779844	0.0104124	-0.0246582	-0.010377	-0.00786895	-0.0156823	0
209.8	0.0168746	0.0118497	0.00925394	0.0151283	0.0432184	0.0361114	0.0443767	0.0221306	-0.0192861	-0.00967391	0
210	0.029232	-0.000141295	0.105257	0.0197064	0.00955908	0.0246772	-0.00645947	0.0553963	-0.0242295	-0.0398461	0
210.2	0.052188	-0.0233873	0.0565466	-0.0138433	-0.0034636	-0.00518472	0.00930729	0.0306539	-0.0239576	-0.0296755	0
210.4	0.0286675	-0.0112157	-0.0167382	-0.0098079	-0.00362432	0.0112975	0.0819303	0.0106196	-0.00932694	0.0237413	0
210.6	-0.0159143	-0.0301633	0.00683185	0.0133611	-0.0146606	0.0381296	0.0758089	0.0104831	0.0278423	0.0363052	0
210.8	0.0224632	-0.00826826	0.0277013	-0.0171512	0.0289006	0.00611634	0.0434597	-0.00522054	0.0426261	0.020842	0
211	-0.0252457	0.0525185	0.0484471	0.0418052	0.0274606	0.0112459	-0.0208106	0.0460936	-0.0148045	0.00684515	0
211.2	-0.0215874	-0.000834364	0.0412045	0.0175053	0.0147816	-0.0244457	-0.0363794	-0.0030234	0.0397268	-0.0361927	0
211.4	-0.0261532	-0.0113236	0.0137135	0.0240919	0.00417218	-0.00640221	-0.0395427	-0.0380619	0.0596078	-0.000318502	0
211.6	-0.0142508	0.0328559	-0.00937674	0.0146929	-0.0111295	0.00961768	-0.031648	-0.027547	-0.000609853	0.0362689	0
211.8	-0.00959312	0.025409	-0.0392196	-0.0605347	0.00658604	-0.00406789	-0.0307358	-0.0025513	-0.0560898	0.00959336	0
212	-0.0356826	-0.0176501	-0.0660461	-0.0503739	0.0363049	0.00809557	-0.0204209	0.00272834	-0.0505094	-0.0071622	0
212.2	0.011623	-0.0305661	-0.0324578	0.0692252	-0.00191356	0.00405662	0.0417061	-0.0462878	0.0181241	-0.000556017	0
212.4	0.00939039	-0.0576563	0.0113016	0.0311135	0.000408215	-0.00423308	-0.0125975	0.00265223	0.0472783	-0.0113541	0
212.6	-0.00608775	-0.0225694	-0.0363283	0.000669699	0.00815467	-0.0239278	0.00458385	0.0516641	-0.0332917	-0.0237443	0
212.8	-0.0154962	0.000678861	-0.00817785	-0.0132503	-0.00102115	-0.0171828	-0.0024289	0.041045	-0.0459219	-0.0122578	0
213	-0.00130954	-0.00968058	0.0208656	-0.0350651	-0.00449531	-0.0043488	-0.0125476	-0.00490113	-0.0270577	0.016632	0
213.2	-0.00305352	-0.00978689	-0.0199434	-0.054066	-0.0130368	0.0244223	0.00779627	-0.0411785	0.00352472	0.037047	0
213.4	-0.0359143	-0.000270133	0.00272054	-0.0424202	-0.0313562	0.0381168	0.00654955	-0.0451927	0.0761638	0.0292603	0
213.6	0.00608371	0.000172124	0.0335283	0.0374175	-0.00451498	-0.0782923	0.0588578	-0.0298989	-0.0171865	-0.00642058	0
213.8	0.0150295	-0.0273461	0.0247681	0.0127433	0.00496089	-0.0373682	-0.0365159	-0.012221	-0.0320297	-0.0340684	0
214	0.0104249	0.0130068	-0.00625434	0.0039217	-0.00608232	-0.0031679	-0.0341041	-0.0182749	-0.0408152	-0.0178915	0
214.2	-0.00373864	0.0448457	-0.017861	-0.00235004	0.00740645	0.0152209	-0.0183641	-0.0104175	-0.0352427	-0.0156498	0
214.4	-0.0231291	0.018554	-0.0161804	-0.0210667	0.0269353	0.0324372	-0.0205747	0.0181723	-0.014663	-0.00155677	0
214.6	-0.0137361	-0.0147251	-0.018975	-0.0141867	0.0180441	0.00758477	0.0277155	0.0292153	0.00730027	0.0258598	0
214.8	0.0114152	-0.0320604	-0.0258472	0.00396349	0.00620228	-0.0152418	0.00904575	0.00986215	0.0518099	-0.0149903	0
215	-0.0125291	-0.0205042	-0.0506096	0.0448276	-0.00318426	-0.0214511	-0.0487173	-0.0166516	0.0199026	-0.0241165	0
215.2	-0.0228794	0.00199169	-0.00738118	0.0273877	-0.0248491	0.0279445	-0.0250874	0.0155757	0.031259	-0.0208274	0
215.4	0.0453446	0.0104087	0.0175413	0.0123045	0.0206282	0.017319	0.0290931	0.0512448	-0.00208344	0.00838393	0
215.6	0.0506551	0.0404248	0.0510886	-0.0177992	0.0244709	-0.0105366	0.0220314	0.0307152	-0.00733438	0.027874	0
215.8	-0.0153019	0.0382122	0.0514824	-0.00190261	-0.0173017	-0.00182502	-0.0239146	-0.00779538	0.0218298	0.00965127	0
216	-0.0191484	-0.00734687	-0.00504905	0.0535378	0.00847825	-0.00335821	-0.0321893	-0.0059361	0.00614002	-0.00438957	0
216.2	-0.00669521	0.03485	0.0393561	-0.0268077	0.0229398	-0.00216585	-0.0082476	0.0145421	0.019293	0.00978712	0
216.4	0.0020533	0.0110437	0.0114412	0.0158222	0.0142911	0.0155933	0.0118985	0.0224768	-0.0401037	0.00129736	0
216.6	-0.00486144	-0.0261776	-0.00572229	0.0160895	-0.00650106	0.0106355	0.0696531	0.00847532	-0.0318919	0.00419704	0
216.8	0.00122542	-0.022178	-0.0174524	-0.00394651	0.00695794	0.00878831	0.0443212	-0.00245143	0.014291	0.0222337	0
217	0.0156893	0.0111359	-0.0179378	-0.0109609	0.008778	-0.012219	0.00483096	-0.0154191	-0.00217828	-0.00619991	0
217.2	-0.00261074	0.0241559	-0.0121577	-0.0138437	0.00589622	-0.0269835	0.0362098	-0.0206882	-0.0283315	-0.0330639	0
217.4	-0.0222865	0.00153547	-0.0144168	0.0124834	0.033479	0.022178	0.0267986	-0.00366107	0.0172688	0.0116124	0
217.6	0.0327937	0.00401902	0.0387261	0.00426364	-0.0254975	0.0277374	-0.0218212	-0.0239323	0.0390087	0.00388977	0
217.8	0.0247723	0.0218306	-0.018741	-0.047197	-0.0253975	-0.0137858	-0.0103525	-0.0508796	0.0330476	0.0186558	0
218	0.0232233	-0.0121279	-0.036377	0.00323501	-0.0063317	-0.0226058	-0.0114001	0.00479016	0.0100355	0.00551848	0
218.2	0.0222384	-0.00361319	-0.0101682	0.0320264	-0.00382888	0.0123462	-0.0197731	-0.00262983	-0.0367644	-0.0190528	0
218.4	0.0104032	0.016055	0.00448301	0.00345198	0.0118764	0.00558914	-0.0320571	-0.0137986	-0.0370595	-0.0122401	0
218.6	0.00813078	-0.0312753	0.0111026	0.00360114	0.0265196	-0.0276357	-0.0454132	0.0501054	0.0109073	-0.00657365	0
218.8	-0.0029559	-0.0296179	-0.00267677	-0.011438	0.00228806	0.015103	-0.00967628	0.0173009	-0.0146765	-0.0141227	0
219	-0.00331071	0.0269799	-0.00150508	-0.0085453	-0.000928563	0.017352	0.0150888	0.0208855	-0.0455383	0.0334077	0
219.2	-0.0474217	-0.00650736	0.00596417	-0.00176756	-0.0128063	-0.0126814	0.0399984	0.00181748	0.00514309	-0.0120229	0
219.4	-0.0500611	-0.00117437	-0.036286	-0.00736522	-0.0136771	-0.0153459	0.0385487	-0.0198694	0.0787449	-0.00543562	0
219.6	-0.0154147	0.00636042	-0.0276381	-0.0169528	0.00683458	-0.00765263	0.015676	-0.0144783	0.0416626	-0.00653597	0
219.8	-0.00467158	-0.0128716	0.0334791	-0.00467241	0.0211401	0.00633328	-0.00134927	0.0240493	-0.0528782	-0.0335709	0
220	-0.00225912	-0.00263194	0.0180903	0.0190815	0.00530311	0.0271378	-0.0133177	0.0524035	-0.0334234	0.0170621	0
220.2	0.0190752	-0.045015	-0.0159095	0.00187448	-0.0160902	0.00246711	0.00438663	0.0081591	0.0436393	0.0215073	0
220.4	0.0187053	-0.0245154	0.0172766	-0.0286966	0.0134138	0.00942481	0.103734	-0.000548459	-0.00398178	0.0221146	0
220.6	-0.0011538	0.0126288	0.0292782	-0.00882465	0.00343606	-0.00659761	-0.00455566	-0.049907	-0.000579921	0.0225163	0
220.8	-0.00441149	0.0333932	-0.0174835	0.0392535	-0.0175043	-0.0135578	-0.0824868	-0.0426967	0.0113981	0.0156981	0
221	0.0143896	0.0296686	0.0120614	0.0120809	-0.0136569	-0.00728409	-0.0497813	-0.0087331	0.00275423	0.0143942	0
221.2	0.0168896	0.0128047	0.0483873	-0.0455119	-0.0158616	0.00076648	-0.0403728	-0.0173419	0.026064	-0.00133952	0
221.4	0.00765347	0.015735	-0.0402687	0.00768587	-0.0168529	0.0236035	0.00333186	0.00443476	0.0296564	-0.028026	0
221.6	0.0407001	0.01844	0.0295114	0.0425394	0.0258477	0.010424	0.0542812	0.0251378	-0.0262212	0.0125621	0
221.8	0.000134253	-0.0321257	-0.0273141	-0.0742296	0.011334	0.0182874	-0.0121207	0.0314218	-0.024725	-0.0166264	0
222	0.000661307	0.00415442	-0.023353	-0.0383892	-0.00586808	0.00438245	-0.0500675	-0.0137222	-0.0377004	-0.0242837	0
222.2	-0.00113548	0.0133146	0.0119284	0.0502519	-0.00138724	-0.0163845	-0.0272769	-0.00236338	-0.0250077	-0.0140249	0
222.4	-0.0118584	-0.0110034	-0.0135627	0.042568	0.0114155	-0.00190073	0.00752389	0.0365807	0.0234265	-0.00678061	0
222.6	0.00387279	0.0242265	-0.0356209	0.0142982	0.0110893	0.0144882	0.03998	0.0183199	0.0249781	0.00998243	0
222.8	-0.0264118	-0.00351692	-0.0271172	0.0036165	-0.022295	-0.00670242	0.0417879	0.0203678	-0.0153349	1.74307e-05	0
223	0.000213889	-0.0500122	0.0316463	0.0586688	-0.019371	0.00305572	0.026254	-0.01925	-0.0389483	0.0123465	0
223.2	-0.0181826	-0.0205608	0.00728821	-0.00914674	0.0169815	0.0176059	0.0661657	-0.0172911	0.0138822	0.023982	0
223.4	-0.0744578	0.00370904	-0.00979087	-0.0343604	0.0318906	-0.00816203	0.0337287	-0.0176788	0.00596054	0.0138635	0
223.6	-0.0429066	-0.0128056	-0.000913082	0.017099	0.0034862	-0.0215366	-0.00865823	-0.0175209	-0.032396	0.00230708	0
223.8	0.0191705	-0.0155176	0.00832942	0.0407993	-0.0107408	-0.00363147	-0.018307	-0.0087642	-0.0144612	0.0121408	0
224	0.00760035	0.0172007	0.0410391	0.0201044	0.0154689	-0.009665	-0.0482185	-0.016416	0.0126296	0.0153069	0
224.2	0.0404455	0.0291859	0.0388262	-0.0354498	0.00207712	-0.017906	0.00478388	0.00310631	0.0185672	-0.019474	0
224.4	-0.0136746	-0.0394358	-0.00115864	-0.0233064	-0.0199032	0.00374965	-0.0141372	0.0096713	0.00868962	-0.0118508	0
224.6	-0.014189	-0.0188668	0.0220696	-0.000482804	-0.0180018	-0.012162	-0.00352049	0.0314406	0.036295	-0.00359706	0
224.8	0.0242623	-0.0185961	0.0110583	-0.0384294	-0.00204277	0.00535973	0.00134086	0.0431038	-0.00354682	0.0150785	0
225	0.0454144	-0.0236344	-0.0308413	-0.0541387	0.0151659	0.0130798	-0.019404	0.0248699	-0.0225019	0.00510008	0
225.2	0.0417457	0.0404587	-0.0197184	0.0129224	0.0181046	-0.0145982	-0.000590296	-0.00466561	0.0388038	-0.0289459	0
225.4	-0.00180899	0.0390636	-0.0101426	0.0383854	-0.000100336	0.0224747	0.0261419	-0.020221	0.0225871	-0.000384098	0
225.6	-0.0269974	-0.00223576	-0.00910684	-0.0383794	0.00102549	0.0161965	-0.00714243	-0.0123662	0.00484588	0.00944686	0
225.8	-0.00322982	0.0393755	0.0759158	-0.0258255	0.00702394	0.0158459	0.0311734	-0.0539276	-0.0540309	-0.0214681	0
226	-0.0257497	0.0539925	0.031464	0.00863376	-0.0213547	0.0132327	0.011522	0.0208968	0.0196373	-0.0136869	0
226.2	-0.020076	0.0157065	-0.0171596	0.0158359	-0.00102164	0.00093172	-0.00881329	0.0390122	0.0445397	0.0295852	0
226.4	0.0284746	0.0312819	0.0146834	0.061253	0.0323433	0.00844307	0.00855809	-0.0201853	-0.0155084	0.0415032	0
226.6	0.0169569	0.0705424	-0.00778618	0.0847132	-0.00568414	0.0235825	-0.0119917	0.0177957	0.0182615	0.0177	0
226.8	-0.0132008	-0.00739982	-0.0573785	-0.0225141	-0.0148034	-0.000178268	-0.013785	0.0241123	0.0221913	0.00021349	0
227	0.00311204	-0.0492396	-0.10965	-0.00649711	-0.00659416	-0.00708934	-0.0077287	0.00884817	-0.0339823	-0.0320304	0
227.2	-0.0144624	-0.0216449	-0.0408445	0.00126114	0.000692223	-0.00941804	-0.0596482	-0.00804681	-0.0654027	-0.00813769	0
227.4	0.00902328	-0.0196274	0.0173993	-0.0278563	-0.0207023	-0.0146976	-0.024755	0.00507202	-0.0307642	-0.0131569	0
227.6	0.0436013	-0.0240665	0.0301255	-0.0239628	-0.0180402	0.00917246	0.0251733	0.00484694	0.00709679	-0.0310206	0
227.8	0.0348738	-0.0198579	0.0371854	0.0235063	0.0252173	0.0522594	0.039504	-0.0109015	0.0067887	-0.00557846	0
228	0.0325402	-0.0263518	0.0291927	0.038956	0.0441427	0.0670106	0.0860236	0.0128863	0.0111935	0.0199891	0
228.2	0.0139081	0.038442	0.0622641	-0.0190882	0.0372718	0.0441158	0.017299	0.0301048	0.0365757	0.0341815	0
228.4	-0.0270534	0.035415	0.0575291	0.000578268	0.000864794	-0.0489114	0.0149788	0.0352309	0.038304	0.0255546	0
228.6	-0.0277087	0.0275733	0.056443	0.0115981	-0.0250555	-0.0211392	0.00328157	0.011443	0.00440693	0.0108349	0
228.8	0.0269081	0.00364178	0.0253738	0.0445572	-0.00859926	0.0270078	0.0377851	-0.00798003	0.00277112	0.0158835	0
229	0.047473	0.000698623	0.00208839	0.0775428	0.0500061	0.0420096	0.0714145	0.00838797	0.0463774	0.0159836	0
229.2	0.00432422	0.0309113	0.0118015	0.0142163	0.0680133	0.0517126	0.0214559	0.0209663	0.0477068	0.00164641	0
229.4	-0.0247871	-0.00127491	-0.0218131	-0.0681193	-0.0161216	-0.0135948	-0.0104417	-0.0292444	-0.00763365	0.00261241	0
229.6	-0.0661653	-0.0266575	-0.0220627	-0.0404304	-0.0523447	-0.0397392	-0.0403172	-0.0876609	0.0037542	-0.00656691	0
229.8	-0.0874037	-0.0903429	-0.0450863	-0.0763051	-0.0284745	-0.0378444	-0.0487889	-0.0215095	-0.0495001	0.048168	0
230	-0.0193193	-0.0379474	-0.0587775	-0.0299861	-0.021195	-0.0347932	0.00309715	0.0364368	-0.0223344	0.0172323	0
230.2	0.0111152	0.0208178	-0.0425446	-0.00638212	-0.0108133	-0.0177081	-0.0316959	8.42492e-05	-0.00778842	-0.0405112	0
230.4	-0.0077757	-0.0143703	-0.0315487	-0.0338656	0.00703782	-0.016574	-0.0784115	-0.037478	-0.035179	-0.046696	0
230.6	0.00143006	-0.0406987	-0.0568703	0.00760633	-0.0113602	-0.0563582	-0.0131924	-0.0315425	0.0257777	-0.0464088	0
230.8	-0.0473643	-0.0460244	-0.0716106	-0.0152663	-0.0221581	-0.0694747	-0.049628	-0.0481816	0.047097	-0.000594316	0
231	-0.000771333	-0.0228911	0.0255465	-0.00338159	0.00801426	-0.0554543	-0.0217607	0.0147727	-0.0102007	0.0316204	0
231.2	0.0266344	0.00413711	0.0367123	0.0101667	-0.0212566	-0.0450044	-0.0352346	0.0133985	-0.0163908	-0.0288669	0
231.4	0.0261944	-0.0406648	0.0160485	0.0217269	-0.0282443	-0.0337868	-0.0614252	0.0121568	-0.0375644	-0.0135039	0
231.6	0.00121199	-0.0428477	0.0184596	0.0255502	-0.00461141	-0.0140438	-0.0106557	0.0216388	-0.0759415	-0.00168346	0
231.8	-0.0343575	0.0268383	0.00949119	-0.00636327	-0.00801786	0.0111838	0.0222056	0.0135584	-0.0477283	-0.0582613	0
232	-0.0173513	0.0244458	-0.00311278	-0.041669	-0.0170101	0.0159153	-0.0448038	0.0299896	0.0173165	-0.0379329	0
232.2	0.011874	0.0318678	-0.0174412	-0.00298918	-0.0267641	-0.0232582	-0.0202203	0.013094	0.0376502	-0.0332414	0
232.4	0.00160739	0.0340497	0.0152185	0.0481732	0.00280801	0.00739766	0.0327791	0.0200059	0.0263539	0.0534585	0
232.6	0.0267968	0.0373455	0.0870159	0.0611956	0.0482859	0.0587684	0.0840332	0.0286325	-0.0163953	0.0230473	0
232.8	0.0171877	0.0350504	0.0326333	0.0145173	0.03671	0.0323385	0.0510221	0.00263627	-0.00803678	-0.000960804	0
233	0.00794425	0.016557	-0.0471941	0.00797413	0.011616	-0.00907382	-0.000930128	-0.02063	0.0231615	0.0579119	0
233.2	0.0376339	0.0171975	-0.0156189	0.0681498	0.0202942	0.0223604	0.0198486	-0.0140758	0.00414876	0.0548778	0
233.4	-0.0042118	0.0486135	-0.0234573	0.0415773	0.0119795	0.0502328	0.0276846	-0.0112504	0.00666703	0.00220566	0
233.6	0.0191153	0.0175456	0.0159101	-0.0255927	0.0572531	0.0317154	0.0368388	0.0162163	0.038352	0.0102023	0
233.8	-0.00162857	0.030679	0.0413455	-0.0265696	0.0685887	0.0394764	0.0113236	0.0346488	0.00458881	0.0238328	0
234	-0.0129109	0.0124426	0.0549965	-0.0170596	-0.0049583	0.00447579	-0.000968467	-0.00692864	-0.0188666	-0.00872902	0
234.2	-0.0187313	0.019323	0.0332073	0.0229127	-0.0367429	-0.0131912	-0.0345552	-0.0301095	-0.0483106	-0.0138662	0
234.4	-0.0407246	0.00956368	-0.02997	0.00931901	0.00790608	-0.00791719	-0.0633039	-0.03589	-0.0364918	-0.0182895	0
234.6	-0.0306388	-0.0693471	-0.0635516	-0.0867413	0.00695099	-0.0625806	-0.0360584	-0.0512544	0.0432625	-0.0540654	0
234.8	-0.00717439	0.00428718	-0.0388482	-0.0139457	-0.0390378	-0.0691179	-0.0420595	0.0253227	-0.0130271	0.0198758	0
235	0.00279015	-0.0221732	-0.0222853	-0.0132865	-0.0511909	-0.0164743	0.0268891	-0.0198278	-0.0263791	0.0129469	0
235.2	0.0405811	-0.0525676	0.0221112	-0.00398569	-0.0473097	-0.015203	0.000705753	-0.0379165	-0.0117657	-0.00567129	0
235.4	0.00374362	-0.0237616	-0.0147067	0.00653727	-0.0591518	0.0135508	-0.0396325	-0.00999303	0.0304473	0.00935143	0
235.6	-0.0158171	-0.0255036	-0.0557963	-0.023184	-0.0512375	0.0326279	0.00328081	-0.00755985	0.0603113	-0.0104406	0
235.8	0.026457	-0.0581113	-0.018768	-0.0371143	-0.00559174	0.00100266	0.0431356	-0.00254553	0.0361369	-0.0385451	0
236	0.00275547	-0.0283101	-0.00338232	0.00497524	0.0212197	0.0124188	0.0292225	0.0313334	0.0147184	-0.0104892	0
236.2	0.0572712	0.00999474	0.0504363	0.0319848	0.00338157	0.00255134	0.0516054	0.00732799	0.0258499	-0.0540305	0
236.4	0.0273386	0.0738556	0.0350932	-0.0029307	-0.0261561	0.0565441	0.0413875	-0.00126119	0.00767709	-0.0417642	0
236.6	0.010343	0.0266236	0.0445621	-0.0180141	-0.00159961	0.0522504	0.0124671	0.0495686	0.0219864	0.0403161	0
236.8	0.00368457	-0.0572608	0.0110379	-0.00318111	0.00738551	-0.00691951	0.021	0.0466907	0.0188148	0.0114692	0
237	-0.0171262	-0.0508409	-0.0245676	0.00322866	-0.0203383	-0.0125545	0.0165694	0.0020063	-0.0232512	-0.0467932	0
237.2	-0.0289248	-0.00707843	0.00348612	-0.0114787	-0.0166237	0.00349049	-0.0270956	-0.00720867	-0.0549236	0.00663833	0
237.4	-0.057396	-0.0142716	-0.0416552	-0.0437816	-0.00215487	-0.0393042	-0.0137434	-0.0326056	-0.0832514	0.00685278	0
237.6	-0.023804	-0.0176819	-0.00518102	-0.0521568	-0.023719	-0.00205645	-0.00385167	0.00667489	-0.0537555	0.0237923	0
237.8	0.017903	0.00355387	-0.027197	0.00112024	-0.0215888	0.00329405	-0.0217172	0.00340594	0.0143611	0.0355802	0
238	0.0272274	-0.00196234	0.00353778	-0.00871113	0.0166821	0.0311706	0.0104199	-0.0143513	-0.0160918	-0.00381809	0
238.2	-0.00285639	0.0127601	0.0360828	0.0110463	0.0275572	0.035734	0.0174656	-0.00480237	-0.0125414	-0.0294559	0
238.4	-0.0112639	0.0222684	0.0137515	0.086269	0.0207634	-0.014066	-0.0342844	0.00238962	0.0117506	-0.00354876	0
238.6	0.0207436	-0.0154909	0.0237828	0.0483408	0.0382145	-0.0135025	-0.0241228	-0.0039843	-0.0545815	0.00958787	0
238.8	-0.00527468	0.0396532	-0.00565955	-0.00727054	0.0135956	0.0136893	0.0344693	0.00288427	0.0528348	-0.0045314	0
239	0.0238294	0.0162218	-0.00417396	0.0453593	-0.00177017	0.006779	0.0391356	-0.0110145	0.0412886	-0.00481404	0
239.2	0.0183838	0.00220453	0.00184403	-0.0228953	-0.0224441	0.0134857	0.0089013	0.0161087	0.0419455	0.0294721	0
239.4	-0.0182624	0.0438598	0.0172513	-0.0109461	-0.00367087	-0.000739825	0.0508299	0.025972	0.0668573	-4.23668e-05	0
239.6	-0.00476086	0.0647844	0.0398996	0.0439146	0.02049	-0.0103947	0.0533876	0.0155161	0.00919791	-0.02808	0
239.8	0.0286405	0.0358027	0.0483624	-0.0257525	0.00505317	0.0137652	-0.0202727	0.0422563	-0.0326975	0.0213071	0
240	0.00604318	0.0251327	0.0241828	-0.0248132	0.00345931	0.00254772	-0.00819705	0.0494798	0.0482627	0.0223439	0
240.2	0.00850723	0.044402	-0.0516761	0.0220029	-0.000149617	-0.0152436	-0.0499903	-0.0163495	0.015779	-0.016999	0
240.4	0.0318472	0.0187532	-0.0368967	0.0249797	0.00327904	-0.00464323	-0.00268577	0.00263069	0.00993715	0.0142939	0
240.6	0.0126777	-0.00890789	-0.0319713	0.0225745	-0.00340898	-0.000263865	0.0144571	0.0269593	-0.00415284	0.0173527	0
240.8	0.0107268	0.00114067	-0.00986897	0.0545312	0.0189916	0.0101348	0.00800646	0.0105446	-0.0255249	-0.0122122	0
241	0.0189792	-0.0108886	0.0460764	0.0460761	0.0390353	0.014968	0.0012066	-0.0175441	-0.0412499	-0.0078674	0
241.2	-0.0104606	-0.0588645	0.0297456	-0.00573647	0.00473235	0.00214674	-0.0408842	-0.0291396	-0.0338796	0.0177379	0
241.4	-0.00164211	-0.0378512	-0.0291565	0.0234773	-0.00530505	0.0158986	-0.0328043	-0.00363879	0.0422208	0.0283917	0
241.6	-0.0198528	0.00134593	-0.0074697	-0.0011521	0.0119868	-0.0211502	-0.00806951	-0.00890789	0.00234564	0.0253005	0
241.8	-0.0350163	-0.0344165	-0.0141702	-0.0417673	0.0206864	-0.049038	-0.0545447	-0.0218832	-0.0461994	-0.0228068	0
242	-0.0299203	-0.00830195	0.0127647	-0.0433291	0.0080939	-0.0382572	-0.0411715	-0.0311047	-0.0288974	0.00129674	0
242.2	-0.0225627	0.00489985	0.0227113	-0.0345816	-0.00703537	-0.0181183	-0.0181099	-0.0284284	-0.0159278	0.0218885	0
242.4	-0.0238734	-0.0359332	-0.0284764	-0.0397698	-0.0170647	-0.00473319	-0.028835	-0.0293935	0.00349289	-0.022866	0
242.6	-0.00985077	-0.0015107	-0.0353329	-0.0304582	-0.0163636	-0.000330711	0.0283736	-0.0325621	0.0580355	-0.00371294	0
242.8	0.0190881	-0.0080548	-0.0273031	-0.00121177	0.0142721	-0.0292065	0.0268255	0.0127134	-0.00704649	0.0359984	0
243	-0.0486726	0.0291505	-0.0323875	0.021496	0.0036515	-0.0505044	-0.050199	-0.0168476	-0.0358159	0.000174993	0
243.2	-0.045181	0.0179262	-0.0547533	-0.0386323	0.00519591	-0.010247	-0.0295479	-0.0607614	-0.0252965	-0.00537895	0
243.4	-0.00267086	-0.0256418	-0.0621036	-0.0645018	0.00377226	-0.0297272	-0.051097	-0.0291708	-0.0571608	-0.0269575	0
243.6	-0.0168074	-0.0129785	-0.0396275	-0.0122706	-0.000952467	-0.0750277	-0.0651124	-0.0387023	-0.0792036	-0.0273619	0
243.8	-0.0343334	-0.00478013	-0.0157878	-0.00809194	0.0177389	-0.046295	0.0112533	-0.105826	-0.038461	0.0340567	0
244	-0.0105617	-0.0672387	-0.0144715	-0.059235	0.0184372	-0.0352332	-0.0427552	-0.0310912	-0.024866	0.0122041	0
244.2	-0.0237405	-0.0173362	-0.0206954	-0.00270756	-0.00821645	-0.0316293	-0.0786229	0.0415665	-0.0378239	-0.0302369	0
244.4	-0.0149466	-0.0413451	-0.0387497	0.0402622	0.0143678	-0.0187157	-0.0152902	0.0200269	-0.0153267	0.0026298	0
244.6	-0.0325222	-0.032903	0.0232794	0.0452225	0.0122485	-0.00271607	0.00681804	0.0247809	0.0441482	-0.00535337	0
244.8	-0.00364411	0.0244999	0.0229004	0.00820011	-0.00496261	0.0181377	0.0107338	0.0545288	0.0345277	-0.0136375	0
245	0.0264384	0.0387549	-0.023911	-0.00315504	-0.00385352	0.0401465	0.0329092	0.0358181	-0.014364	0.00754179	0
245.2	-0.0334797	0.0163691	0.0408673	0.0339787	-0.00604709	0.0496935	0.0271147	-0.00903242	0.0069815	0.000371368	0
245.4	-0.0040821	0.0108177	0.0560359	-0.011692	-0.000502465	0.0515971	0.0265548	-0.0174483	0.0306061	0.0230762	0
245.6	0.0476258	0.0504873	0.0420437	0.000322975	-0.0217322	0.0532999	-0.034643	0.032398	0.0515669	0.000571629	0
245.8	0.0386187	0.0117046	0.0227986	0.0155271	-0.0183653	0.024173	-0.00137635	0.027993	0.0324843	-0.017371	0
246	-0.0204822	-0.0371951	0.0210231	-0.0299921	-0.00642164	0.0177506	-0.0136603	0.00105644	-0.0456696	-0.00384148	0
246.2	-0.00934184	0.00932788	0.00715976	-0.0361511	-0.0028022	0.0158516	0.00283399	-0.0132177	-0.0318283	0.0238565	0
246.4	0.062567	0.0468791	-0.017087	0.00833585	-0.00965082	-0.00210212	0.112722	-0.00367053	0.044096	0.0277843	0
246.6	0.0489964	-0.0170693	0.00746452	-0.00496855	-0.0240804	0.0164958	0.103181	0.0365622	-0.00384668	0.00213438	0
246.8	0.00307475	0.00704726	0.0434434	0.00945182	-0.00302891	0.0306181	0.0542534	0.0219687	0.00665256	0.00681541	0
247	-0.00430761	0.00890861	0.0247442	-0.00802538	0.00189888	0.0120125	0.0389344	-0.00403972	0.00237377	0.00140306	0

## Sheet: fly2
Time	gamma-L5	gamma-L4	gamma-L3	gamma-L2	alpha-L	gamma-R5	gamma-R4	gamma-R3	gamma-R2	alpha-R	stimulus			Time	gamma-5	gamma-4	gamma-3	gamma-2	alpha	stimulus
0											0			0	0.00840982	-0.00114166	0.0124932	0.0246071	0.00610799	0
0.2											0			0.2	0.00335683	0.0080675	-0.0198557	-0.0113038	0.0095918	0
0.4											0			0.4	-0.00740686	-0.00757487	-0.013531	0.000895792	0.00137362	0
0.6											0			0.6	-0.013709	0.00176085	0.0187583	0.0148115	0.0196564	0
0.8											0			0.8	0.000533303	-0.0223902	0.00289894	0.0176943	-5.99924e-05	0
1											0			1	0.0117792	0.0154157	-0.013424	-0.012613	-0.0220858	0
1.2											0			1.2	0.00933622	0.0403021	0.0172681	0.00704855	-0.00789767	0
1.4											0			1.4	0.0140122	0.0139672	0.0136359	0.0136433	0.00670593	0
1.6											0			1.6	0.00952099	0.0157048	-0.00571002	0.0177435	-0.00251218	0
1.8											0			1.8	-0.0142561	-0.00340135	0.00975615	0.0218579	-0.0178839	0
2											0			2	-0.0025039	-0.017416	-0.0140407	-0.020933	-0.0132137	0
2.2	-0.0212871	-0.0339994	-0.0480877	-0.00862501	-0.0383891	-0.0268053	-0.0105585	-0.0293246	-0.0244512	0.00661982	0			2.2	-0.00482722	-0.0192257	-0.0181548	-0.0184246	0.00457565	0
2.4	0.00412627	-0.0160671	-0.0217232	-0.0270799	-0.00315214	0.000357239	0.0110118	-0.00641724	0.00165332	-0.0170666	0			2.4	-0.0112182	-0.00273142	0.000407122	0.00156764	0.00987575	0
2.6	0.0302493	0.0467502	0.0371852	-0.0214107	0.0437021	0.0074921	0.0267547	0.0325766	0.0155156	-0.0177963	0			2.6	-0.00239099	0.0090111	0.0188857	-0.00365717	0.00209434	0
2.8	-0.00142825	-0.00581711	-0.03017	0.0397337	0.000485459	-0.0309071	0.00171603	-0.01099	-0.0216936	-0.00784464	0			2.8	0.00780106	0.0119227	-0.00438052	-0.00456474	-0.00612093	0
3	0.0160241	-0.0206601	0.0266513	0.00370044	-0.0064514	-0.00106737	-0.0281001	-0.00361794	-0.018952	-0.0147532	0			3	0.00786355	0.00280752	0.00980255	-0.00383019	-0.00236978	0
3.2	0.050085	-0.0352321	0.000392145	0.0084263	0.0472159	-0.00660167	-0.0652496	0.0182909	0.0117942	0.00815327	0			3.2	-0.00535596	-0.0111579	0.0325443	-0.00800413	0.00985766	0
3.4	0.0466056	0.0185477	-0.0567645	0.0406624	0.0480972	-0.0171388	-0.0403914	0.0321241	-0.0166236	0.0274105	0			3.4	0.00218835	-0.0201464	0.0194994	-0.0120186	0.0259018	0
3.6	0.0107211	0.0430687	-0.01608	-0.000402838	-0.0193605	-0.00471825	0.00120245	0.0256945	-0.0245699	0.00807888	0			3.6	0.00822749	-0.0252882	-0.0186989	-0.00557199	0.0139212	0
3.8	-0.00246945	-0.0574732	0.0335027	-0.0444929	-0.0396443	-0.0027558	-0.0264625	-0.0163856	0.0221793	-0.0259888	0			3.8	-0.00232719	-0.0229164	-0.0182431	-0.0162013	-0.0145639	0
4	0.0247159	-0.0503618	0.018971	0.0129	0.0085235	0.015991	-0.0342439	-0.0440975	-0.0141962	-0.0415612	0			4	-0.00355917	0.00486756	0.00696485	-0.00853097	0.000896105	0
4.2	-0.00331734	0.0238161	-0.0219527	0.0394011	0.00488495	-0.0106603	0.00567805	-0.0226841	0.0378273	0.00530834	0			4.2	-0.0156673	0.00849992	-0.00179697	0.0108014	-0.00296383	0
4.4	0.00219781	0.0239582	0.0240653	-0.0229468	0.00698168	0.0184064	0.0227874	0.0309834	0.0313982	0.0342329	0			4.4	-0.0228199	0.00982208	-0.0207412	0.00044227	-0.00980569	0
4.6	0.0061149	-0.0124956	0.0317651	-0.0140587	0.00658072	0.0193768	0.034385	-0.00230611	0.0170929	-0.000148872	0			4.6	-0.00725718	-0.00560636	-0.00969656	0.00087793	0.00169592	0
4.8	-0.0174059	0.0347566	0.0158103	0.0265231	0.0107983	-0.0147509	0.000699905	-0.0383741	0.0301603	-0.0191824	0			4.8	0.000934133	-0.0136765	-0.0185943	-0.00435588	-0.0147357	0
5	-0.0250127	0.0620483	0.028875	0.0150512	0.00648635	-0.0184756	-0.0365195	-0.000966732	0.0383853	0.00572658	0			5	-0.0033448	0.00605273	-0.0127175	-0.000810682	0.00265033	0
5.2	-0.00721236	-0.0230327	0.0121583	0.00460114	-0.0277605	-0.00962484	-0.00287602	0.0093562	0.0273203	-0.00235384	0			5.2	-0.00258766	0.00595293	-0.00481809	0.0118293	0.0137654	0
5.4	-0.00384867	-0.00410696	-0.00377716	-0.0128627	-0.0121977	-0.0183776	-0.0202543	-0.0174717	-0.0310471	-0.0310495	0			5.4	0.00605293	0.0310995	-0.00848465	0.0133673	-0.00967864	0
5.6	-0.00741589	-0.0497775	-0.0222995	0.00648701	0.0231863	-0.0340163	-0.0116717	-0.0181865	-0.052128	0.00210154	0			5.6	0.00573794	0.0150977	0.00365334	-0.0101441	-0.00777966	0
5.8	-0.00856444	0.0273	-0.00370794	-0.0272548	-0.0248342	-0.0081608	0.0280032	0.0218886	-0.0368441	-0.0193007	0			5.8	0.00443987	0.0141543	-0.00784313	0.00237716	-0.0192736	0
6	-0.0217268	0.0395534	-0.0351851	0.000450802	-0.00896596	-0.00718767	0.0297378	-0.00423583	-0.00378292	-0.0145725	0			6	0.00152434	-0.0147703	-0.00916942	0.00102772	0.00387278	0
6.2	-0.0232012	0.0132874	-0.00649765	0.0286324	0.0301223	-0.00314594	0.0243967	-0.0427917	-0.0120791	0.0140878	0			6.2	0.0175094	-0.0158825	-0.001319	0.00312398	0.00679358	0
6.4	0.0016723	0.0561861	0.0557461	-0.0238219	-0.0282405	0.0175907	0.0286135	-0.0192437	-0.0284066	-0.0108426	0			6.4	0.015317	-0.0187223	0.0084252	-0.00198579	0.00889436	0
6.6	0.00449625	-0.0278746	-0.0407263	0.0122328	-0.0596181	-0.0117191	-0.000326905	-0.0118228	0.0342453	-0.0133445	0			6.6	0.00402344	-0.0242151	-0.00676299	-0.0179356	0.00574267	0
6.8	-0.020297	-0.0869834	0.0347291	0.0813202	-0.0291689	0.0313318	0.0335594	0.0253237	0.0386894	0.0268332	0			6.8	-0.0110487	-0.00706526	-0.0127628	-0.00377878	0.00953488	0
7	0.000693997	-0.0184877	-0.00789574	0.0227783	0.0229259	0.014096	0.00579945	0.0530786	0.0202516	0.0251893	0			7	-0.00619183	-0.014074	-0.00944847	0.0118356	0.00178103	0
7.2	-0.00196586	0.0131251	-0.0108251	-0.0523417	0.00411189	-0.00330428	-0.0393404	0.027117	-0.022112	-0.00293529	0			7.2	0.0113817	-0.0200289	-0.0287177	-0.00660142	-0.0147421	0
7.4	-0.0132663	-0.0680484	0.00839066	-0.0519435	-0.00275064	0.00541773	-0.0191946	-0.0436778	-0.00833805	0.00774278	0			7.4	0.0104762	-0.0118632	-0.000145149	-0.00160476	-0.0113899	0
7.6	0.000800245	-0.0834999	-0.0331461	-0.0301227	0.0300888	0.0131147	-0.00571651	-0.0310145	0.0205209	0.0189535	0			7.6	0.012765	-0.0304258	0.00514551	-0.00249768	0.0175579	0
7.8	0.00184714	0.0302098	-0.0181912	-0.026274	0.0321128	0.0220898	-0.0438244	0.0495676	-0.0289093	0.0023982	0			7.8	0.00748237	-0.00449296	-0.0254004	-0.00189013	0.0164837	0
8	-0.0147982	0.0397935	0.0350642	-0.0136548	0.022924	0.0140871	-0.0111004	0.000844997	-0.0437653	0.0348727	0			8	-0.0044011	-0.00064483	-0.0254041	0.00118814	-0.0108443	0
8.2	-0.00797776	-0.0081296	-0.051587	-0.0544164	-0.0400028	-0.021704	0.0227057	0.0282551	-0.00666763	0.0187495	0			8.2	0.00642747	-0.0259633	-0.0269555	-0.00473812	0.0134011	0
8.4	0.00129317	0.00900626	0.0500918	-0.0511965	-0.0315799	0.00255738	-0.0365951	-0.00662074	-0.00624927	-0.0257692	0			8.4	0.0109697	0.0025582	-0.0455501	-0.00519731	0.0119219	0
8.6	-0.00543798	0.0181155	0.0146239	-0.0481369	-0.0125206	-0.0102575	0.0118781	-0.0205699	0.00165954	-0.00084775	0			8.6	0.00760956	0.0128363	-0.0296266	-0.0189144	0.0129091	0
8.8	-0.000330602	-0.0184115	-0.0964654	-0.0412323	0.00785067	-0.036806	0.0276647	-0.0157389	-0.00387382	0.0075379	0			8.8	0.0156617	-0.0234919	-0.0195963	-0.0129771	0.00611723	0
9	0.0208609	-0.000941209	-0.0341816	0.0373341	0.0388596	-0.0230936	-0.059464	-0.0329612	-0.0160967	-0.0175035	0			9	0.0258262	-0.0286476	-0.0166639	-0.0118443	0.0200253	0
9.2	0.0218964	0.0594932	0.00666117	0.0962588	0.0214357	-0.0140951	-0.00854687	0.000502848	0.020762	0.0159311	0			9.2	0.0130149	-0.016501	-0.0279209	-0.03555	0.0129077	0
9.4	0.012298	0.00417661	-0.00543613	-0.0051743	0.000660672	0.0220923	0.0316439	0.0300272	0.00621358	-0.0174079	0			9.4	0.00303097	0.00493306	-0.0297706	-0.0255786	-0.00396561	0
9.6	0.0169345	0.0332314	0.0676724	0.00271956	-0.0151292	-0.00675934	-0.00454349	0.0232216	0.00705517	-0.021265	0			9.6	0.0166843	0.0187691	-0.0186845	-0.0273765	-0.000312627	0
9.8	0.0121962	-0.00898412	0.00309073	0.0878608	-0.0164162	0.00458448	0.0124686	-0.00399652	0.030475	-0.0110158	0			9.8	0.015279	0.00739823	-0.0194067	-0.0133292	0.00289879	0
10	0.00126023	-0.0495828	-0.00674667	0.062414	-0.0173238	0.0220345	0.0390079	-0.0163757	0.0467027	0.0164158	0			10	0.0363263	0.00298346	0.0359527	0.0128882	0.0235575	1
10.2	-0.040389	0.0113076	0.04236	0.0242085	-0.00351567	0.0162715	0.0164488	0.0160382	0.00165753	0.0135056	0			10.2	0.0955551	0.0602621	0.0662781	0.0611956	0.0203962	1
10.4	-0.0560284	0.0267436	-0.00821474	0.0602185	0.00745631	0.0102491	0.00369076	0.053372	-0.0460374	-0.0318601	0			10.4	0.123568	0.0781651	0.0852463	0.0856131	0.0100542	1
10.6	0.0229133	-0.05693	0.0152672	0.000870028	-0.030502	-0.0181175	0.0241612	0.0154008	0.0222073	-0.0120711	0			10.6	0.121296	0.0776088	0.0951261	0.0641008	0.00837098	1
10.8	-0.016122	0.00853092	0.057949	-0.0457961	-0.0250993	-0.00878997	0.0191526	-0.0464227	0.0530206	0.0351717	0			10.8	0.110085	0.105715	0.0853074	0.0574437	-0.00143765	1
11	-0.0220303	-0.00273831	-0.033218	-0.071399	0.00739482	0.00693498	0.0294821	-0.022631	-0.012311	-0.0111356	0			11	0.0907807	0.0712612	0.0586345	0.0479652	-0.0218452	1
11.2	0.0170963	-0.0270154	-0.0567862	-0.043059	-0.0174997	0.018911	0.0192888	-0.0209958	-0.024274	-0.0334776	0			11.2	0.0636514	0.0394975	0.0149457	0.0240961	-0.0208236	1
11.4	0.0263153	0.0145112	0.000547065	-0.024606	-0.000927007	0.0143295	-0.0340508	-0.0311833	-0.010712	-0.00136718	0			11.4	0.0347176	0.0517302	0.0256932	0.0168826	-0.0155066	1
11.6	0.0146721	0.0204788	-0.00874322	-0.0398609	0.07454	-0.00303715	-0.0420656	-0.0155658	-0.0415284	0.00707593	0			11.6	0.0321636	0.0335596	0.0373531	0.00308268	0.00377559	1
11.8	0.0328089	-0.00580961	-0.0360103	-0.0043908	0.0725749	-0.0027424	0.0182163	-0.0179844	-0.032556	-0.00139199	0			11.8	0.0308262	0.0411805	0.0258903	0.00179799	-0.00170848	1
12	0.0535828	0.0711155	0.0308651	0.0430395	0.0140723	0.0169427	0.0148361	-0.00675098	0.0360824	0.0223847	0			12	0.0131228	0.0305915	0.0277911	0.0161395	-0.0243445	1
12.2	0.0294409	0.0290546	0.0144056	-0.0530665	-0.0131998	0.0166504	0.0123839	0.0384514	0.000270491	0.00955397	0			12.2	-7.40115e-05	0.00926403	0.0244532	0.00426159	-0.0241817	1
12.4	0.0270263	0.0124289	0.017049	0.00746989	0.0083249	-0.0158843	-0.0194226	0.0777847	-0.016355	0.0260625	0			12.4	-0.00101402	0.0246554	0.000620245	0.00824372	-0.0269904	1
12.6	0.0250756	0.0056547	0.0168288	0.0788986	-0.0041058	0.0190042	-0.0252705	0.0416105	0.0420621	0.0116794	0			12.6	0.00487584	0.0114444	0.00116212	0.0116292	-0.0498114	1
12.8	0.00554286	-0.0190554	0.0180202	0.0718318	-0.0416034	0.014884	0.00478476	-0.0217993	0.0315509	-0.00891856	0			12.8	0.0025827	0.000187127	0.00164508	2.56029e-06	-0.0286694	1
13	-0.00324236	-0.0175329	0.0369519	0.0516973	-0.0330634	-0.0534253	-0.00439594	0.00936345	-0.0416355	0.00612154	0			13	-0.0205497	-0.00557592	0.00493002	-0.00834981	-0.0145714	0
13.2	-0.00406438	0.0103437	0.0195672	0.00778682	-0.000541643	-0.0202563	-0.0444888	0.0710524	-0.00882794	-0.0114108	0			13.2	-0.000618803	0.0105523	0.0148076	-0.000495544	-0.0245988	0
13.4	-0.0197829	0.0309849	0.0037633	0.0203656	-0.00360262	-0.0164892	-0.00908378	-0.0353317	0.0304363	-0.0285114	0			13.4	0.0189677	0.0469302	0.0138469	0.0169289	-0.0357244	0
13.6	-0.0120107	-0.0621465	-0.030003	-0.0537482	0.0124226	-0.026271	0.0236996	-0.0262083	0.0292706	0.00961844	0			13.6	0.0114398	0.0478661	0.0268827	0.015951	-0.0205235	0
13.8	-0.0376544	-0.0442068	-0.027908	-0.0182631	-0.0079587	0.00836648	0.0304152	-0.00109549	0.0017292	0.0126704	0			13.8	0.0204478	0.0534658	0.0322195	0.0293501	-0.0214716	0
14	-0.0623206	0.00684731	-0.0238947	0.0121329	-0.0306821	0.0244437	0.0240949	-0.0480414	-0.00273587	-0.0455987	0			14	0.0232836	0.0641513	0.0364703	0.0451095	-0.0140028	0
14.2	-0.0365056	-0.0250879	-0.0100622	-0.0458642	-0.00473456	0.0198812	0.0168262	-0.0343518	0.020055	-0.0351352	0			14.2	0.0321265	0.0292783	0.0284176	0.0433574	-0.0241953	0
14.4	0.000222914	-0.0180355	0.0223115	-0.0412335	0.0310372	0.0239235	0.00923641	0.0554761	0.0244954	0.0347322	0			14.4	0.020877	0.0312815	0.0279095	0.0464128	-0.0190647	0
14.6	-0.00133333	0.0522998	-0.0117156	0.0123941	0.0197893	-0.00458057	-0.00275325	0.030892	-0.0137118	-0.00512499	0			14.6	0.0165677	0.0533241	0.0301613	0.0461765	0.0139539	0
14.8	-0.015087	-0.00809206	-0.0418099	-0.0157298	-0.0194121	0.0153815	-0.00251225	-0.022857	-0.0670833	0.0116456	0			14.8	0.0283453	0.0654586	0.0235606	0.0250953	0.000115031	0
15	-0.0166846	-0.00552119	-0.0180792	-0.000734245	0.0151226	-0.00377972	0.00254667	0.00132583	-0.0573987	0.0313808	0			15	0.0193043	0.0556066	0.0371181	0.0145733	-0.014296	0
15.2	-0.0218591	0.0176731	0.0214352	-0.0118569	-0.000599391	-0.0115668	-0.0109931	0.0150139	-0.0226627	-0.00136024	0			15.2	0.00769994	0.0416921	0.034782	0.0305277	-0.00777587	0
15.4	-0.00191044	0.0147063	0.0528827	-0.00555322	-0.024633	-0.0041317	-0.0358509	8.70467e-05	0.026448	0.00338652	0			15.4	0.00107667	0.020461	0.0342677	0.0303501	-0.00375398	0
15.6	0.0151077	0.0218897	0.0575031	-0.00317024	0.00603855	0.00454771	-0.0278074	-0.023028	0.0396719	0.0319205	0			15.6	0.00801947	0.0347958	0.0344494	0.0219013	-0.00523234	0
15.8	-0.0107322	0.0274911	0.0077522	-0.0481621	0.0188736	0.010447	-0.0125978	-0.0429321	-0.0111542	0.00427333	0			15.8	0.0173741	0.0313776	0.0264274	0.0101792	-0.00399099	0
16	0.00688486	0.00188908	-0.0409984	0.0458618	0.0270259	-0.0390478	-0.0473598	-0.00698064	-0.00418315	0.0135476	0			16	0.00963928	0.00462656	0.0179876	0.0124028	0.00988324	0
16.2	0.0224871	-0.0350993	0.012932	0.0152672	0.00388673	-0.0110184	0.0454632	-0.0499365	-0.0295735	-0.0176699	0			16.2	0.000531648	4.81534e-05	-0.0028588	0.0106107	-0.00492224	0
16.4	0.030205	-0.047955	-0.0309798	-0.0348008	0.0134096	-0.00680532	0.0300443	-0.0546377	-0.0383231	-0.0145765	0			16.4	-0.00327622	0.00594213	0.0108385	0.0219778	-0.0158563	0
16.6	0.0252432	-0.0396173	-0.0346295	0.0216529	0.00909073	-0.00179068	0.0223114	-0.0183517	-0.0211164	-0.0303547	0			16.6	0.0111282	0.00449625	0.0236353	0.0205819	-0.0168442	0
16.8	0.00531178	-0.0156386	0.025535	0.0256926	-0.011331	-0.000543278	0.0180746	-0.00465021	0.0249504	-0.0365975	0			16.8	-0.0043995	-0.00407524	0.00332271	0.00306269	-0.00401237	0
17	-0.000253279	0.0169542	0.0115741	-0.0358201	-0.0100096	-0.0227266	-0.0571768	-0.0065154	0.078525	-8.13215e-05	0			17	0.00483305	0.00690817	-0.0171419	0.00511402	0.00422189	0
17.2	0.0215656	0.0518035	-0.0172593	0.041418	-0.0170516	0.000284195	-0.0356995	0.0259406	0.0678501	-0.00954507	0			17.2	0.0193489	0.0192626	-0.00114944	0.0058851	-0.00748942	0
17.4	0.0170769	0.0861359	0.0109695	0.0616372	-0.0204505	0.0187388	0.021073	0.0862159	0.00602838	-0.00732943	0			17.4	-0.00338718	0.0187123	0.0027131	-0.0022187	0.00399229	0
17.6	0.00885414	0.00260521	0.0481483	0.0106923	0.0134978	-0.0241509	0.000918711	0.0300945	-0.0410903	0.0170627	0			17.6	0.00130353	-0.00420319	0.00864495	-0.020051	0.000353294	0
17.8	0.00933961	-0.0570743	-0.00350342	-0.00266107	-0.0223155	-0.0237344	0.0270507	0.0513986	-0.0154518	0.00988415	0			17.8	0.000520584	-0.0128216	0.0045091	0.00362864	0.00240831	0
18	-0.00332905	-0.0182922	-0.00455014	0.0180368	-0.0598402	0.00161564	0.0124702	0.0554756	0.0134636	0.0139534	0			18	-0.0055774	0.0205804	-0.00424534	0.00235936	-0.0109114	0
18.2	-0.0196805	0.0520105	0.0324289	0.0104096	-0.0132156	0.0261255	-0.0377879	-0.00999875	0.0107038	0.0176504	0			18.2	-0.00247034	0.00375285	0.00180062	-0.00838771	-0.02203	0
18.4	-0.0165143	0.0309862	-0.00913359	-0.0262193	0.0361876	0.0318509	-0.00790825	-0.0252408	0.0139076	-0.0121634	0			18.4	-0.00989248	-0.00375805	-0.0056954	-0.00835397	-0.00935195	0
18.6	-0.0129839	-0.100595	-0.00221185	-0.0436786	0.011395	-0.0316105	-0.00119742	-0.0444263	0.00455687	-0.00404538	0			18.6	-0.0101095	0.0042987	-0.00325498	0.012959	0.00619265	0
18.8	-0.0148947	-0.0737094	0.00308442	-0.0199704	-0.00899059	0.0130584	0.000773214	-0.0193372	-0.0153658	-0.0087043	0			18.8	-0.0012092	-0.0234789	-0.000495846	0.00150232	-0.00492167	0
19	-0.0361198	0.0182232	-0.0253032	-0.0195393	0.0197454	0.00186564	0.00235115	0.000806189	-0.00231792	0.0184147	0			19	-0.00879648	-0.00519153	0.0150448	-0.020453	-0.00149641	0
19.2	-0.0405871	0.0102021	-0.00720389	-0.0408129	0.0250771	-0.000461189	0.0106116	-0.0433173	-0.0132566	-0.00340574	0			19.2	-0.0149414	-0.0115862	0.00472624	-0.00836977	0.0116908	0
19.4	-0.0220437	-0.0629339	-0.0156385	0.0158402	-0.00973505	0.0245201	0.00550006	-0.0457929	-0.0276748	-0.0194103	0			19.4	-0.00677981	0.00471076	-0.00266191	0.00980765	0.00842797	0
19.6	-0.0128365	-0.0443989	-0.0307911	0.0520295	-0.0214325	0.0215449	-0.00577735	0.0378853	0.010562	-0.00029191	0			19.6	0.0139212	0.0113134	0.0101327	0.00615458	0.00991448	0
19.8	-0.00298227	0.0511339	0.0349718	-0.042616	0.0151943	0.023827	0.0027427	0.0767532	0.0299987	-0.0338134	0			19.8	0.00892198	-0.0252689	-0.0047666	0.00339908	0.00202779	0
20	0.0366719	0.0278221	-0.0085036	-0.0228738	0.0404679	0.0241422	0.00250552	0.0310309	-0.0406358	-0.0296624	0			20	0.00487678	-0.000946589	-0.0146323	0.0117117	0.0100832	0
20.2	0.0124104	0.00302067	-0.0175681	-0.0204325	0.00150407	-0.0340691	0.0187615	-0.0306618	-0.0226478	0.0495012	0
20.4	0.0132687	0.0140847	-0.00709021	0.0447932	0.00711848	-0.0222838	-0.00880628	-0.00535038	-0.0138629	0.0313558	0
20.6	0.0285547	0.0236546	0.0075719	0.0180529	-0.0160575	0.0235338	-0.0417631	-0.00849483	0.0159515	-0.000339127	0
20.8	0.0102141	0.0277378	0.00224689	-0.0160371	-0.0275698	0.0125534	-0.023466	0.00102018	0.0239946	0.00468791	0
21	0.00712923	0.0366848	-0.00911857	0.0404999	0.000831485	-0.0138566	0.0136041	0.0501001	-0.0169085	0.00226232	0
21.2	0.0513989	0.025913	0.0226175	-0.00728902	-0.0493211	0.00823253	0.03193	-0.0105669	0.0210722	0.0274149	0
21.4	0.0382568	0.00454178	0.00496984	0.0276308	-0.00166509	0.0149985	0.0613723	0.00398899	0.0254669	0.0142985	0
21.6	-0.00513494	0.0483666	-0.00833958	0.0313859	0.0278443	0.0149758	0.00902294	-0.00246461	-0.00408861	-0.0238011	0
21.8	-0.0268676	0.0156477	-0.00085183	0.0215763	0.0314721	-0.00486503	-0.0551595	-0.0249763	-0.00576746	-0.00158678	0
22	0.00778606	-0.0168469	0.0346509	0.0352823	-0.00370322	-0.0246808	-0.0180664	-0.010272	0.0231072	0.0309956	0
22.2	0.048466	0.0111033	0.0144594	0.0294393	-0.0249806	-0.00517051	0.023891	0.0119566	0.0395741	0.0163591	0
22.4	0.0212225	-0.0159155	-0.0564557	-0.0138203	0.0206062	0.0262515	-0.00842862	0.0058834	0.0264252	0.00324514	0
22.6	-0.0233491	-0.0580875	-0.000484791	-0.0265551	0.0168852	0.0090666	0.0316372	-0.00209686	0.00357444	0.0151065	0
22.8	0.0010568	0.00530898	0.00217679	0.00551132	-0.0215543	-0.00242379	0.0189242	-0.051089	-0.0195961	-0.00304756	0
23	-0.0124958	0.0215915	-0.0134339	-0.0128239	0.0161812	-0.0284697	-0.0143571	-0.0458038	-0.0387753	-0.0365236	0
23.2	-0.00539699	-0.0189533	-0.00676594	-0.0479238	0.000915266	-0.00969903	0.0181497	0.00221169	-0.0283017	-0.031118	0
23.4	0.00736526	-0.029861	0.00850933	-0.0282445	-0.00514304	0.00383485	0.0445117	0.0245691	-0.00364494	0.010055	0
23.6	-0.0183127	0.00843383	0.0262586	0.00491496	0.028535	-0.018553	0.0222343	0.0225909	0.0047916	0.0271869	0
23.8	-0.0143615	0.00764487	0.0445032	-0.0241413	-0.0243244	0.00288548	0.012824	0.0215013	-0.000146867	-0.00944811	0
24	0.00626203	-0.0785866	0.0311104	-0.0416099	0.00255611	0.0193056	-0.0212612	0.00135841	-0.0120492	-0.044926	0
24.2	-0.0078158	0.0123804	-0.0130145	0.0472138	0.01978	0.0190562	0.0274577	0.0354056	-0.0146112	-0.0117889	0
24.4	0.00433687	0.0596312	-0.0373957	0.0449732	-0.00452642	0.0141168	0.0449403	0.0215364	0.0251093	0.0134473	0
24.6	-0.0136249	-0.0135912	0.00277169	-0.0256899	-0.0117908	0.0109647	-0.0190145	-0.0209998	0.0287989	0.00872127	0
24.8	-0.0340546	-0.0220987	0.0314021	-0.0472636	-0.00880123	0.0076056	-0.0330708	-0.00380613	-0.0175425	-0.00149357	0
25	-0.00606597	0.0482844	-0.0103872	-0.0181463	-0.000307431	-0.0112784	0.00303688	0.0353364	-0.0277471	-0.0122022	0
25.2	-0.0218585	0.0145482	-0.0321349	0.0105383	0.039609	-0.0431619	-0.0455315	-0.00509939	-0.00571794	-0.016322	0
25.4	-0.0291051	-0.0204247	-0.0129127	-0.0132379	-0.0142466	-0.030732	-0.00146761	-0.064184	-0.0306432	-0.00192339	0
25.6	-0.00210137	-0.0134635	-0.00387452	-0.00206517	-0.0211082	-0.00734907	-0.0117432	-0.0148834	0.00282106	-0.000585778	0
25.8	0.0246787	-0.00297091	-0.0309311	0.0202915	-0.00330005	-0.00643674	-0.0249698	0.00554378	0.0350094	-0.0088963	0
26	0.016102	-0.00957097	-0.0275987	0.0193688	-0.0100709	-0.0257629	-0.0365762	0.0104752	0.00792343	0.00151617	0
26.2	0.00433506	0.0211243	0.0237833	0.00409654	-0.00692043	-0.0270387	-0.0527653	0.0157208	-0.00523764	0.00912188	0
26.4	0.0207926	0.0387916	0.0353526	0.000819605	0.00565818	0.00875565	-0.00030633	-0.00616126	0.0253322	-0.00955831	0
26.6	0.00924889	-0.0611986	-0.00846118	0.0213419	-0.0295295	0.0237794	0.067033	0.0543026	0.0165561	-0.0100254	0
26.8	-0.0311993	0.0482124	0.00649698	0.000486882	-0.0234959	-0.0207583	0.0137799	0.00175586	0.0554722	-0.0159413	0
27	-0.0303317	0.00248731	-0.0118284	-0.031945	0.0294727	0.00763536	-0.0220787	0.0292465	-0.000803828	-0.00529311	0
27.2	-0.00201129	-0.0533499	0.0179655	0.00553068	0.0516575	0.0264539	0.00677058	0.0201945	-0.0322755	0.00191494	0
27.4	-0.00337914	-0.0336013	0.0269692	0.0237692	0.0110638	0.0132978	-0.0116595	-0.0201847	0.00149198	0.0134978	0
27.6	-0.00581814	-0.0399084	-0.0112351	-0.0203959	-0.00236492	0.0230137	-0.0324552	-0.0131548	-0.00942703	0.0264622	0
27.8	0.0235005	-0.00575678	0.0372589	-0.0137854	0.0391046	0.0211078	0.0493074	-0.0328401	-0.0491345	0.0204581	0
28	-0.0119622	-0.0039873	-0.00662199	-0.00309846	-0.0250617	0.0220259	0.0251574	0.0226082	-0.0453149	0.0486607	0
28.2	-0.0103364	-0.0241883	-0.0482576	0.0433324	-0.0264684	0.0265612	0.0340146	-0.0230395	-0.0163236	0.023387	0
28.4	0.0125495	0.0633143	-0.00368865	-0.00611572	0.0275429	0.00563884	-0.0270677	-0.0135793	0.0146789	0.0100944	0
28.6	0.00491713	0.0551513	-0.0253929	-0.0332013	0.00325541	-0.0178083	-0.0303922	-0.0334431	-0.00721696	0.00218411	0
28.8	-0.010221	-0.00988817	-0.0685181	-0.0441934	-0.0470538	0.00144121	0.0208802	-0.0428028	-0.0169603	-0.0194688	0
29	0.00303922	0.021634	0.00864621	-0.0864339	-0.0224147	0.0179653	0.000644686	0.0484499	0.0371291	-0.00974626	0
29.2	0.0102222	-0.0231554	0.0571557	0.0293754	-0.00547862	-0.025614	0.0239116	0.00899551	0.033611	0.0115558	0
29.4	-0.0172436	0.0514275	0.0493455	0.0822274	0.0072245	-0.001341	0.0035031	-0.0280337	0.00825283	-0.0341995	0
29.6	-0.031987	-0.00186079	0.0161214	0.0243687	-0.0387767	-0.0221389	-0.0077692	0.0164106	0.0209104	-0.013479	0
29.8	-0.00294775	-0.0437723	-0.0249166	-0.02945	-0.0192165	-0.0297424	0.0292855	0.0300639	0.0399939	0.0055046	0
30	0.0197383	-0.00582897	-0.00957893	-0.00782007	0.0220658	-0.000552997	0.0206947	0.0286249	-0.000119666	-0.0144033	0
30.2	0.00146519	0.0213431	0.0288468	0.00433178	-0.000838143	0.0271377	-0.0247472	0.0217012	-0.0481014	-0.016954	0
30.4	-0.000869668	0.0159131	0.00618379	-0.0337039	-0.000215681	0.0297792	-0.00901018	-0.0409251	-0.0271201	0.00765567	0
30.6	0.0447282	-0.012674	-6.4387e-05	0.0181853	0.0506605	-0.03267	-0.00490446	-0.0506085	-0.0223104	0.0183997	0
30.8	0.0279612	0.0471953	-0.0163872	0.0488998	0.0294019	-0.0511594	0.0154297	-0.0487425	-0.0364499	-0.0139686	0
31	0.00898063	-0.000364529	-0.0531333	0.0213088	0.00942437	-0.00308874	-0.000413679	-0.0410778	-0.00277496	0.0145959	0
31.2	-0.00116437	-0.0518617	-0.0255418	-0.0286872	-0.0228253	0.0222276	-0.0630061	0.0179033	0.0249182	0.00923324	0
31.4	-0.00589656	-0.028127	0.034984	-0.0163495	-0.0430673	-0.000866629	-0.0581677	0.0243851	0.0057564	-0.0375134	0
31.6	0.0136817	-0.0311819	0.00117019	0.0474813	-0.00295341	-0.00776298	0.0200343	-0.00726858	0.00434435	-0.0228151	0
31.8	0.0266848	-0.0445738	-0.0704922	0.0467081	0.0133675	0.0130192	0.0321824	0.0518395	0.0289027	0.00823566	0
32	-0.00528737	0.0328027	0.0252911	-0.00548861	-0.0355657	-0.00601023	0.032539	-0.0268522	-0.0208556	-0.0149054	0
32.2	-0.000120203	0.0757749	0.0891598	-0.0797791	0.0256024	-0.0117225	0.013385	0.0167389	0.034007	0.00408668	0
32.4	-0.00263441	0.0129174	0.0563044	0.00289192	0.0471203	-0.00102456	-0.0390751	0.0182842	0.00685576	-0.00624781	0
32.6	-0.0139998	-0.0677682	-0.00594683	-0.00652341	0.0052222	0.0269318	-0.0234045	-0.00354548	0.0101879	-0.0130768	0
32.8	-0.00699489	-0.0269993	-0.031572	-0.032259	-0.00193656	0.0360613	0.0309696	0.0149781	0.0443015	0.0290689	0
33	-0.0118784	0.076852	0.000468501	0.0808371	0.00824982	0.0132938	0.0148077	0.00972755	-0.0149963	0.0405219	0
33.2	-0.0344717	0.0271075	0.0316254	-0.0423895	-0.0162047	0.0259362	0.0106442	0.0291042	0.0151866	-0.009517	0
33.4	0.00311785	-0.0615675	-0.0480164	0.0465394	-0.0137143	0.0280206	0.0386725	0.0286962	-0.0572385	-0.013598	0
33.6	0.0132993	-0.0169097	-0.0536334	-0.00879754	-0.00245717	0.0327206	-0.00517018	0.0637415	-0.00434206	-0.0113802	0
33.8	-0.00304801	0.0141235	0.022024	-0.0131766	0.0107223	-0.00967113	-0.0355807	0.0448291	0.0128606	0.0153562	0
34	0.00792397	-0.00253482	0.0291348	0.0589743	0.0197021	-0.0168875	-0.0102411	-0.0119839	-0.0177738	0.0441609	0
34.2	0.0194557	-0.0097958	0.000516358	0.0500695	0.00158964	0.0145373	0.0158938	-0.0379054	-0.00247128	0.024198	0
34.4	-0.00336896	-0.0156727	0.0204099	0.0313546	-0.0199384	-0.0249461	0.0270702	-0.0656243	-0.0127791	-0.0197218	0
34.6	0.00897217	0.0435341	-0.0426898	-0.0504278	0.0111693	-0.0238888	0.0294495	-0.0688283	0.00741905	-0.0234453	0
34.8	0.0171836	0.0424436	0.0440712	-0.113695	-0.00824459	-0.0210578	0.0111925	0.0198513	0.00417352	0.0286698	0
35	0.00772077	0.0175954	-0.0198625	-0.0344772	-0.0256981	0.00373259	-0.00573838	-0.00416071	-0.0204597	-0.005445	0
35.2	-0.0054649	0.0207306	-0.0382965	0.0580044	-0.0291556	0.0127086	-0.0135248	-0.0207879	-0.0109625	-0.015434	0
35.4	-0.00332151	0.00707823	0.0330856	0.0343989	-0.0127129	-0.00831426	-0.00666708	0.0176781	0.0200756	0.0195053	0
35.6	-0.00182275	-0.00477327	-0.00939567	-0.00871011	0.0128052	0.00436247	0.0229721	-0.00830507	0.00558834	0.0115523	0
35.8	-0.0157447	0.0456972	-0.0275675	0.0168251	0.00673095	0.0389955	0.046002	-0.0303425	-0.0453522	0.00972256	0
36	0.0180259	0.00518286	-0.00507151	-0.0284513	0.0279032	-0.023099	0.00597241	0.00931585	-0.0374324	-0.0228088	0
36.2	0.0301312	-0.00588414	-0.018295	-0.00498567	-0.0256164	-0.00828152	-0.0502953	0.0210271	0.0285946	-0.00669368	0
36.4	0.00625465	-0.0626346	0.0170239	0.0114248	-0.0120095	-0.0222645	-0.0583683	-0.012976	0.0569125	0.0198782	0
36.6	-0.00257807	-0.0915494	0.0405411	-0.0325888	0.0337331	-0.0298968	-0.053549	-0.0276617	0.0191981	-0.00482226	0
36.8	-0.00664962	-0.0249616	0.00986749	-0.0379128	0.0196422	-0.0023679	-0.0190283	-0.0217527	-0.00121264	-0.00886395	0
37	-0.0268933	0.00468624	-0.00917494	0.0190562	-0.00296291	-0.028376	0.0311943	-0.0281441	0.0222258	0.0252661	0
37.2	-0.00852682	-0.0210417	-0.0342993	0.00862104	-0.0112474	-0.022032	-0.0381961	-0.00653139	-0.00469264	-0.026895	0
37.4	-0.00717335	0.0618	-0.000245985	-0.0207829	0.0114714	0.0446796	-0.0281701	0.00569688	-0.0263534	0.0124844	0
37.6	0.014682	-0.0472377	0.0264646	-0.00937182	0.0407575	0.0149872	0.00782677	-0.0100273	-0.0157545	-0.0105743	0
37.8	-0.00588435	-0.021794	0.0013406	0.0135212	0.0101034	-0.0208854	0.0280658	0.0170333	-0.0155089	-0.0382808	0
38	-0.0302199	0.0449514	-0.0411611	-0.0117435	-0.0135315	0.00152816	0.0343121	0.0360744	-0.00420005	-0.0238205	0
38.2	-0.0110995	-0.0318195	-0.0283749	-0.0517753	0.00373829	0.0198752	0.042229	0.0242926	0.020648	0.00902533	0
38.4	-0.00890225	0.0281676	0.0418751	-0.00916384	-0.00310051	0.0148365	0.0434329	0.0506183	0.0120111	0.0501968	0
38.6	0.00507824	0.0398864	0.0490798	0.063111	0.0266178	0.00108712	-0.013989	0.0160319	0.0235239	-0.00635864	0
38.8	-0.00714685	0.0126064	-0.0205924	-0.0218723	-0.0165225	-0.0183057	-0.00539042	-0.0118666	0.0118976	-0.0381661	0
39	0.00563189	0.0335665	-0.0498915	0.00801255	-0.0168636	-0.0304385	-0.0327476	0.0139522	0.00760195	0.0224257	0
39.2	0.0336604	0.0165979	-0.0143279	0.0233022	-0.00860049	-0.00392239	-0.0743513	0.0132279	0.00612294	0.0209282	0
39.4	0.0268558	-0.0131	-0.00733147	-0.0190027	-0.0263423	0.00703553	-0.0182428	-0.038592	-0.00349961	-0.00112593	0
39.6	-0.00734099	0.00896795	-0.0348774	0.017529	-0.0169902	-0.0202333	0.0305227	-0.0479067	-0.00032948	0.0463759	0
39.8	-0.0174229	-0.0256961	-0.0111276	-0.00499284	-0.010296	0.00586759	-0.0599788	0.00781953	0.00794034	0.00623632	0
40	-0.00027437	-0.0442376	-0.0245321	-0.0259239	-0.0204293	0.0243699	-0.00106748	0.00780032	-0.0148019	-0.0213615	0
40.2	-0.0185252	-0.0442339	-0.00156548	-0.0316888	-0.027347	0.00725141	0.0112742	-0.00573942	-0.00940177	-0.0315326	0
40.4	0.00133845	0.0462151	-0.00802706	0.0412221	0.00662057	-0.0181084	0.0470038	-0.0464221	0.0132596	-0.0465911	0
40.6	0.0194763	0.0322778	0.00909905	0.041548	0.0391255	-7.63942e-05	0.042773	-0.0497519	0.00950236	-0.000893084	0
40.8	0.0153586	-0.0270719	0.0299005	-0.060847	0.0270771	0.0210116	-0.0121134	-0.00663635	0.0107904	0.0378206	0
41	0.0338263	0.0626607	-0.00374578	-0.0441663	-0.000220913	0.00530256	0.0331878	0.00785372	0.0287954	-0.0186852	0
41.2	0.00380736	-0.00812531	0.0577488	0.0594009	-0.00551983	0.0258511	0.0473925	0.0349512	-0.0131955	-0.000264931	0
41.4	0.0126192	-0.0124213	-0.00901897	0.00891203	0.0210253	-0.0162956	-0.0436149	0.046577	0.000795802	0.0104139	0
41.6	-0.0185096	-0.00424742	0.0229597	-0.0136989	-0.0121749	0.030397	-0.0340423	0.0424412	0.00845588	-0.0225963	0
41.8	-0.0118159	0.00295312	0.0345049	0.0202911	-0.000869155	0.0257784	0.0249322	0.0367848	0.0145748	0.00368952	0
42	-0.0048226	0.0339775	-0.0180609	0.0452184	0.0169408	-0.0104455	-0.00396296	0.0107584	0.014595	0.0360406	0
42.2	-0.0404111	0.0259969	-0.00672039	0.0329416	-0.00984696	0.00400563	-0.0461879	0.00490592	-0.0157706	-2.84092e-05	0
42.4	-0.0157573	-0.0476761	0.00449139	-0.0098554	0.0206622	-0.0447216	-0.000683345	0.0522396	-0.0340913	-0.00340307	0
42.6	-0.022093	-0.0626886	-0.03678	-0.000793693	-0.00373494	-0.0343641	-0.00215124	0.00871836	-0.0155146	0.013408	0
42.8	-0.0137181	-0.038907	-0.0283104	-0.0344136	-0.0108028	-0.0179099	0.0216192	-0.00251964	0.0156025	-0.04243	0
43	-0.0222061	-0.00117318	0.0212511	-0.0390267	-0.014179	-0.0218137	0.048039	-0.00233722	0.0167825	-0.00906555	0
43.2	-0.0280468	0.00107492	-0.00459561	-0.0102765	-0.0101777	-0.0144506	-0.0332185	-0.0019256	0.0126743	0.0345551	0
43.4	-0.0189188	0.0122583	-0.04209	-0.00345853	0.00533379	-0.00430794	-0.0691779	0.00755149	-0.0109736	-0.0103084	0
43.6	-0.00831586	0.0219702	-0.00271912	-0.0297587	-0.000839322	-0.00943566	0.0278469	0.0159796	-0.0279687	-0.0269593	0
43.8	0.0224887	-0.0652698	-0.00949886	-0.0473271	-0.0216515	-0.00644564	-0.00292983	0.018663	0.04466	0.019651	0
44	0.0215226	0.013442	0.00372479	0.0330592	-0.00276922	-0.0247419	0.0154074	-0.0265921	0.012538	-0.0154606	0
44.2	0.0247383	0.0567603	0.0252574	0.0660439	0.0195932	0.0221479	0.0312373	-0.0256105	-0.0207849	0.00330453	0
44.4	0.0380294	-0.0156161	0.0605725	0.0425526	0.022577	0.00333236	0.012211	0.0390011	-0.000996842	0.00903818	0
44.6	0.0153723	-0.00899975	0.00980445	0.00392362	0.010607	-0.017974	-0.0170415	0.0110927	-0.0119895	-0.0174111	0
44.8	-0.0113211	0.022513	-0.0536328	-0.0106908	0.00812973	0.0327128	-0.0276478	-0.0854172	-0.0518548	-0.0165209	0
45	0.0255427	-0.037075	0.020356	0.0139634	0.0213241	0.0234118	-0.0209491	-0.0616652	-0.0271341	0.00374661	0
45.2	0.0498322	0.0876448	0.0359961	0.00742649	0.0094818	-0.0196137	-0.0244155	-0.012253	0.0136703	0.0203844	0
45.4	0.0109549	-0.020622	0.0791825	-0.00452055	-0.0140041	0.0108721	0.00140741	-0.0100849	0.000197436	-0.0306713	0
45.6	-0.0191135	0.00826697	0.0400523	-0.0176681	-0.040418	-0.0202137	-0.013724	-0.0146745	-0.0481486	-0.0147531	0
45.8	0.00257538	0.0297448	-0.0134587	0.0103975	0.00052743	-0.0150069	0.00384166	-0.00696166	0.000441326	0.0135561	0
46	0.00421896	-0.0225493	0.00364374	0.0479764	0.0209383	0.0154026	0.0266631	-0.0258552	0.0373898	-0.00927784	0
46.2	-0.0345156	0.0024718	0.0238781	0.0220385	-0.0336542	-0.0106658	0.00861688	0.00190226	-0.0190627	-0.0314971	0
46.4	-0.0246354	-0.0163455	-0.0102027	-0.0250653	-0.0171251	0.00330288	0.0322002	0.102506	0.00786263	-0.0144894	0
46.6	-0.002449	0.0114352	-0.0377022	-0.0062149	0.0118558	-0.00114299	0.0170162	-0.027552	0.0175788	0.038643	0
46.8	-0.0012501	0.0100794	-0.0200405	-0.00468298	-0.00154991	0.0326052	0.0786405	-0.0399082	-0.00296283	0.00913403	0
47	-0.0246856	-0.0308908	-0.0379051	0.0103861	0.0203698	0.0501909	0.0511252	0.035416	-0.00536348	0.00647497	0
47.2	-0.0381501	0.00893826	0.00407331	0.000310231	0.0203892	0.0468432	0.0142211	0.0522784	0.00481724	0.0378618	0
47.4	-0.00355638	0.0584516	0.0189608	-0.0149275	0.00295595	0.0125064	0.0415181	0.0144259	0.0198135	0.0226243	0
47.6	0.022192	-0.0266139	-0.07802	0.0131838	0.0237903	-0.0376557	0.000210363	-0.0142735	0.0146376	-0.0132493	0
47.8	-0.0325676	-0.0807062	-0.00202374	-0.0104737	-0.0191614	-0.000826434	-0.0569247	-0.0103692	-0.0308809	0.00110405	0
48	0.0025521	-0.00262437	0.0232378	-0.0147168	-0.0286625	0.00930223	0.00804083	0.00630286	0.0458601	0.0221974	0
48.2	0.0214056	0.0157558	-0.00455554	-0.0103287	-0.00412293	0.0101212	-0.0104433	0.00777842	0.00576657	-0.019277	0
48.4	0.0190255	0.0178604	0.017731	-0.0072954	0.00298214	0.0185431	-0.0177423	-0.00950053	0.0110965	0.00908954	0
48.6	-0.00315563	-0.00406695	0.0705763	-0.025543	-0.0059864	0.0288444	-0.0218583	0.0118114	0.0319172	0.0112942	0
48.8	-0.0339745	-0.0132251	0.0211676	-0.0322149	-0.0103032	0.0114369	-0.0596511	0.0340713	-0.0329371	-0.0254369	0
49	-0.0114829	0.040324	-0.0815952	0.00425514	-0.0111708	-0.0322357	-0.0146055	-0.0283925	-0.029045	0.0516138	0
49.2	0.0184197	-0.0571045	0.010937	-0.0124243	-0.00447919	-0.0183284	0.0111981	-0.0510448	-0.0146252	0.00758385	0
49.4	0.0159696	0.0651205	0.0126147	-0.0135804	-0.0162877	-0.0016078	-0.0343905	-0.000884436	-0.029755	-0.0113701	0
49.6	0.0343454	0.0287366	-0.00824312	-0.0147937	0.0442411	-0.018266	-0.0196409	0.00618632	-0.0305313	-0.0123583	0
49.8	0.0126615	-0.0527959	0.0181193	-0.0126479	0.0369654	0.00828995	-0.0205919	-0.00387697	0.00156989	-0.0328195	0
50	-0.00511575	0.0117051	0.0158802	-0.0268346	-0.016876	0.0269729	-0.0353699	-0.00815844	0.0156708	-0.00489396	0
50.2	0.0232221	0.032963	-0.0361564	-0.0371934	0.00258203	-0.0187637	0.00553651	-0.0418833	-0.0137012	0.0397499	0
50.4	-0.0207236	-0.0374238	-0.0471404	0.0152774	0.00186808	-0.0266661	0.0120448	-0.052975	-0.0278602	-0.0254346	0
50.6	-0.0293797	-0.0191002	-0.0133073	0.0105196	0.0403512	-0.0492689	0.0294085	0.0016975	-0.00115435	-0.0326045	0
50.8	0.00719151	-0.0409727	-0.021396	0.0474709	-0.00683524	0.00208916	0.022365	0.00876519	0.0113068	0.000126892	0
51	-0.00605026	-0.00622268	-0.00768923	0.0277197	-0.0243056	0.0197637	0.0481049	-0.026488	-0.0131546	0.00105528	0
51.2	-0.00981029	0.0359645	0.0291021	-0.0143657	-0.011286	-0.0192519	0.0392962	-0.0138333	0.000872451	0.00504335	0
51.4	0.0367572	0.0213299	0.00366032	0.0225388	-0.00580062	-0.0127017	-0.00264515	0.0208858	0.0259972	0.0142667	0
51.6	0.0347398	0.0104033	-0.0353081	0.0655119	0.00907055	0.0207984	0.00816647	0.0308437	0.0168574	-0.0102395	0
51.8	-0.0221292	-0.0316528	0.0356115	0.0228451	-0.0324018	-0.017486	-0.00818875	0.0876999	0.0662329	-0.0104997	0
52	-0.025809	-0.0273452	0.0151542	-0.00409345	-0.0138101	0.0222783	0.0134971	0.0622246	-0.00455631	-0.0146393	0
52.2	0.00488603	0.0140055	-0.0133945	0.00389185	-0.00987038	0.0131775	0.0348852	0.0169977	0.00911356	-0.0122924	0
52.4	0.0152834	0.0365856	0.0242595	0.0340862	-0.00188938	-0.0128701	-0.0200722	-0.0336888	-0.0391549	0.0215616	0
52.6	0.00615023	0.00111514	0.0489689	0.00761147	-0.00272699	0.00549163	-0.00495242	-0.0377677	-0.0734115	0.0225298	0
52.8	0.00274674	-0.0178637	0.00548201	-0.0482826	-0.0261866	0.0194144	0.0272093	-0.0122484	0.0094581	-0.0162928	0
53	-0.00464984	0.0382175	-0.0344035	-0.0114363	-0.00191964	-0.00365367	-0.105357	-0.0331229	-0.00404183	-0.001799	0
53.2	-0.0262238	0.0165015	-0.0231015	-0.00383914	0.0410994	-0.0229155	-0.0381307	0.0184354	-0.00614571	0.0192272	0
53.4	-0.00232449	-5.14044e-05	0.0031644	-0.0920274	0.0482949	-0.0324579	-0.0619831	-0.0249312	0.00187249	0.0198354	0
53.6	0.00738323	-0.0531949	-0.0285515	-0.0470256	-0.00878054	-0.0341523	-0.0637416	-0.0499257	-0.00301769	0.0209715	0
53.8	0.00713597	-0.0112579	-0.0463854	-0.0350221	-0.0231056	-0.027541	-0.0042307	-0.00535424	-0.025729	0.0167281	0
54	-0.00814278	0.0553627	-0.00303328	-0.027628	0.00846116	-0.0105547	0.0132267	0.0196545	-0.0291902	0.00476952	0
54.2	-0.0367143	0.00380319	0.0277952	0.055041	0.00443099	0.0156862	-0.00795626	0.0069696	0.00337425	-0.01541	0
54.4	-0.00988037	-0.00542219	0.00693416	-0.057157	-0.00188666	0.0174606	-0.000840428	0.0176055	0.0283609	-0.0430021	0
54.6	-0.00793863	-0.0509602	-0.0115929	0.0396467	-0.0292189	-0.041622	0.0141994	-0.00126502	0.0407757	-0.0121323	0
54.8	-0.0244848	0.00627456	-0.000741597	0.0882849	-0.0175944	0.0150238	0.0121486	-0.0300565	-0.00551988	-0.0146932	0
55	0.00772436	0.00204517	-0.00287454	0.00708049	0.0294583	0.0244992	0.00393636	-0.0201147	0.00411721	-0.00731698	0
55.2	0.0206248	0.00200159	0.000371326	-0.0145764	0.0266613	-0.00833523	0.0188577	-0.00128389	0.0159	-0.00178935	0
55.4	-0.0189923	0.0382498	0.00996727	0.0346001	0.000443437	-0.000912212	0.0347813	0.00629512	-0.0215501	-0.0154997	0
55.6	-0.00847814	-0.0110156	-0.0075395	0.0113205	0.013357	0.00142523	0.0234146	0.0366186	-0.00959268	-0.0151354	0
55.8	0.0400507	0.0209347	0.0018422	-0.00592921	-0.0302557	0.0418252	0.0259943	0.0421931	0.0219335	-0.0342945	0
56	0.00618778	-0.0351297	0.021674	0.0173549	-0.0242298	0.00689336	0.00684122	-0.0501572	0.0294927	0.00534499	0
56.2	0.0348908	-0.0242427	0.0320904	0.0252586	0.024006	0.00920319	0.0165848	0.0196621	0.00016049	0.0286225	0
56.4	0.0256055	-0.00230812	0.00796442	-0.00174572	-0.000735353	0.0353588	0.0238203	0.000205483	-0.0128591	0.0355305	0
56.6	-0.0148583	0.00174634	0.0330527	-0.0244047	-0.0170174	0.0213363	-0.0222103	-0.0456075	0.00477078	0.0280656	0
56.8	0.00284874	0.027493	0.0691604	0.0103199	0.0312529	-0.0191332	-0.0492963	0.0365689	0.0275946	0.00473958	0
57	-0.00856118	-0.00335953	-0.034356	0.0503962	0.00192058	-0.034162	0.00138502	-0.0161757	0.0381083	0.00275725	0
57.2	-0.0103429	-0.0394054	-0.0590534	-0.038186	-0.0251043	0.0140606	-0.00751965	0.00515616	0.00385078	-0.012868	0
57.4	-0.0207767	-0.00101774	0.0145447	-0.000649825	-0.013121	0.0262505	0.0280104	0.053115	-0.00797431	0.00107204	0
57.6	-0.018239	-0.0365595	-0.0191025	0.0382691	0.0226038	0.0454376	-0.0196835	0.0360295	-0.0101762	0.0347466	0
57.8	-0.00965648	0.00186745	-0.0138988	0.00930199	0.0154981	0.0491988	-0.0197218	0.0134756	-0.012973	0.014448	0
58	-0.019188	0.0484974	0.0401775	0.0137196	0.00363385	0.0104848	0.0469515	0.016277	-0.0294556	0.0075959	0
58.2	-0.0271579	-0.0450055	-0.0278262	0.0749163	0.0303937	-0.00107684	0.00820628	0.00863077	-0.0445173	0.062817	0
58.4	-0.0110832	0.00116524	-0.0456877	0.0759576	0.00822951	0.0397755	0.0108447	0.019313	-0.021631	0.0294615	0
58.6	-0.0266653	-0.0299811	-0.0109401	-0.0335991	0.0137714	0.0385144	0.142286	0.0158919	-0.0633484	0.0107175	0
58.8	-0.0323497	-0.0181944	-0.0542273	0.00948303	-0.00237612	0.0321076	0.0361463	-0.00685421	-0.0173731	0.0420857	0
59	-0.0199715	-0.00678913	-0.012589	0.0322174	0.0409038	0.0570237	-0.0210871	-0.0196544	-0.011779	0.0378347	0
59.2	-0.0108502	-0.00440798	0.0241661	0.0124753	0.0569622	0.0571537	0.0316526	0.00416568	-0.0395806	0.00969425	0
59.4	-0.0202866	0.0189147	-0.0233178	0.0227251	0.0065028	0.0495429	0.0584009	0.0647911	0.00627572	0.016401	0
59.6	-0.032781	0.0132173	-0.00198284	-0.0223828	0.00500882	0.0889714	0.0908783	0.102182	0.0241291	0.0175608	0
59.8	-0.00903957	-0.00811792	-0.0176056	-0.0231508	-0.0288415	0.0732489	-0.00113094	0.0577704	-0.0548872	-0.0125078	0
60	0.0225766	-0.0475132	0.0137965	0.0195359	0.0246797	0.098195	0.0796029	0.0879722	-0.0266702	0.0417057	1
60.2	0.107332	0.0453075	0.0856605	0.116805	0.0516	0.164759	0.157571	0.141248	0.111464	0.0524608	1
60.4	0.128149	0.0882631	0.138103	0.121893	0.035564	0.184955	0.170521	0.146786	0.136526	0.00664637	1
60.6	0.112087	0.0841278	0.125941	0.0692325	0.0422094	0.149244	0.146048	0.147745	0.073835	0.00470133	1
60.8	0.133117	0.135873	0.0975245	0.0927542	0.0516648	0.125587	0.100875	0.155657	0.075476	0.0321967	1
61	0.0906311	0.0866755	0.0928488	0.0823484	0.0157146	0.12125	0.106723	0.107355	0.0629277	-0.00361481	1
61.2	0.0729045	0.0633737	-0.00743239	-0.0119228	-0.012823	0.0818683	0.107715	0.0824895	0.0190207	-0.0281615	1
61.4	0.0516903	0.0576117	0.0499573	0.0601141	-0.0213406	0.0546825	0.0680793	0.118673	0.00598786	0.0147526	1
61.6	0.0614867	0.0434202	0.0719978	0.0786722	0.000196774	0.0472214	0.0790191	0.130641	0.00509845	-0.00616158	1
61.8	0.0690523	0.0901848	0.0371018	0.0393383	-0.0121566	0.0423827	0.073133	0.0906122	0.0227459	-0.0452039	1
62	0.0420472	0.116226	0.0430128	0.0326276	-0.0444861	0.025718	0.0174511	0.0765095	0.0607675	-0.0419179	1
62.2	0.0225238	0.0104461	0.0287872	0.0190624	-0.0267142	0.00813242	0.0496559	0.0980084	0.0491671	-0.0392422	1
62.4	0.0285389	-0.0247027	-0.010473	0.0552206	-0.013289	0.0173838	0.143036	0.0655311	-0.0276135	-0.0179211	1
62.6	0.0503388	0.075102	-0.0226251	0.0226474	-0.00662075	0.0176628	0.0396327	0.0644706	-0.0177804	-0.0630375	1
62.8	0.0454069	0.0244778	-0.00756781	0.027734	-0.0417905	0.0245083	-0.0141206	0.0107736	-0.02333	-0.0382524	1
63	0.0234417	0.0216342	-0.00675875	0.0416429	0.0204113	0.0138738	0.0185625	0.0134092	-0.00964153	0.00561946	0
63.2	0.0405543	0.0810704	-0.0114928	0.0130142	0.0319314	-0.0236821	0.00635855	0.0382477	0.0130964	0.0113635	0
63.4	0.064209	0.0817814	0.00777509	0.0118077	-0.0541248	-0.0273509	0.00977534	-0.000643179	0.0255051	0.0043052	0
63.6	0.042157	0.111255	0.0152848	0.0704977	-0.0189569	0.0287996	0.0910125	0.00734698	0.06456	0.000567299	0
63.8	0.0722711	0.0790715	-0.0159879	0.0757276	-0.0519797	0.0462266	0.0178084	0.0700435	0.0372586	0.0233292	0
64	0.0551961	0.0939565	0.0478003	0.0802018	0.00586085	0.033868	-0.0253694	0.0566058	0.0583129	-0.00218865	0
64.2	0.0646619	0.0254501	0.0486027	0.0782651	-0.0172555	0.0247785	-0.0244433	0.0387152	0.0605784	-0.0369284	0
64.4	0.0722788	0.0058859	-0.0020006	0.0954994	-0.0143245	0.0333657	0.0205805	0.0382735	0.0411236	0.00737581	0
64.6	0.0438453	0.0811576	-0.0111685	0.0897622	0.0466253	0.0313995	0.0628309	0.0339484	0.0614982	0.0465696	0
64.8	0.035167	0.0913428	0.00874284	0.0233838	0.00810986	0.0208011	0.0550493	0.0555832	0.0954265	0.00279733	0
65	0.0423024	0.0644123	0.0278424	0.00704739	-0.039007	0.0389034	0.0474017	0.108247	0.0742756	0.000761239	0
65.2	0.00895168	0.0734381	0.0175174	0.0591684	0.00623512	0.0168341	0.00544682	0.102174	0.047278	0.0226395	0
65.4	0.0177694	0.0172506	-0.00438805	0.0396367	-0.0100078	0.00245929	0.0182793	0.0106917	0.0595341	0.0133856	0
65.6	0.0427229	0.0319119	0.0111555	0.0685218	-0.016354	0.0161083	0.0431462	0.0404487	0.0246158	-0.0114621	0
65.8	0.0482321	0.0408828	0.082286	0.0608038	-0.0105598	0.0180441	0.0637833	0.0705258	0.0296301	-0.00674134	0
66	0.0380922	-0.00352916	0.0970238	0.000528992	-0.00881849	0.0144282	0.0645635	0.0230279	0.0707916	0.0220493	0
66.2	0.0134747	0.0339741	-0.00332797	0.0339186	0.0286293	0.0309746	0.0149431	0.0564181	0.00962817	0.0191305	0
66.4	-0.00198707	0.0493164	-0.0416099	0.0273204	0.0166841	0.0194165	0.00275173	0.0626556	-0.0195251	-0.0203015	0
66.6	0.0364271	-0.0228124	-0.0316497	0.0312443	-0.0144811	0.00972677	0.0539793	0.0279662	0.0374892	-0.0043241	0
66.8	0.00373784	-0.037062	-0.00908469	-0.0230768	-0.0127964	0.00338104	0.0157206	0.0506814	0.0110909	0.00387071	0
67	-0.0021123	-0.0198397	-0.00823549	-0.0552263	-0.00792818	0.0218369	0.00751138	0.0257591	0.00290257	-0.0261489	0
67.2	-0.00684395	-0.00234729	-0.0318396	0.00138574	-0.019541	0.0366076	0.0335627	-0.00612805	0.0127337	-0.00888089	0
67.4	-0.0585659	0.0203354	-0.0243674	0.0381803	-0.0401235	0.020448	-0.0213965	0.00690468	-0.0305876	0.0401263	0
67.6	-0.0287492	-0.0107372	0.0359586	-0.0218243	-0.0338142	-0.000936544	-0.0678944	-0.0368286	-0.0275567	0.0201111	0
67.8	-0.00352272	-0.062624	0.0318974	-0.0324795	0.0470032	-0.0360753	-0.0180249	-0.0084981	-0.0110804	0.0341999	0
68	0.00326414	-0.0404357	-0.0534929	0.000272616	-0.030797	-0.0236152	0.0149475	-0.0198848	-0.00902857	-0.0126253	0
68.2	-0.00582163	-0.0295547	0.0302514	-0.0149394	-0.0299274	-0.0107075	0.00852434	-0.0416964	-0.0234664	-0.0401923	0
68.4	4.42654e-05	0.0441816	0.0541399	-0.00529774	0.0205954	-0.0216975	0.00143546	-0.0271027	-0.0263078	-0.00776098	0
68.6	0.0168625	0.0603481	-0.028258	0.051118	-0.00356131	-0.00377284	0.00155964	0.0179996	0.0131562	0.00843901	0
68.8	0.0103984	-0.0346994	0.00478965	0.0439048	3.30679e-05	0.0324326	0.00270149	0.0459083	0.0383139	-0.0286744	0
69	-0.00300541	0.0586373	0.00240133	-0.0315041	0.0560381	0.0113002	0.0189061	0.00823617	-0.0258839	-0.0446326	0
69.2	0.00551027	0.00378985	0.0148865	-0.0696437	0.0198448	0.0200562	0.033129	-0.0283799	-0.0290814	-0.00022721	0
69.4	0.00680015	0.0358962	0.00191668	-0.0235959	0.00326721	-0.0280189	0.0327185	-0.0369514	0.0266452	0.0179056	0
69.6	-0.0214706	0.0210525	0.0061934	0.0264999	0.0268922	-0.0124312	0.000465867	-0.0155237	0.0201894	0.00904145	0
69.8	-0.0388833	-0.00136493	-0.0148041	0.0219978	0.00746842	0.0182841	-0.0534775	-0.0478229	-0.000735929	-0.00201687	0
70	0.00233764	0.0163932	-0.0397635	0.00554445	-0.0232358	-0.0235399	-0.0521732	-0.0785597	-0.00182044	0.0188322	0
70.2	0.0509178	-0.0424388	0.0201315	0.00463842	0.0192927	-0.048198	-0.00420502	-0.00155607	-0.0301479	0.0581031	0
70.4	0.014406	0.0126863	0.036092	-0.028648	0.0397883	-0.0441736	-0.0483998	0.00352212	0.00549592	0.00946233	0
70.6	-0.000984869	0.0168782	0.00968169	-0.00239208	0.00825645	0.00300419	-0.00247308	-0.026759	-0.00739509	-0.0267448	0
70.8	-0.0304246	-0.0204156	-0.0490826	0.010065	0.0161217	0.00970333	-0.0162889	-0.0275699	0.005377	-0.0299351	0
71	-0.041635	-0.00990889	-0.0551037	-0.00466287	-0.0239586	-0.00712259	-0.0255009	0.00743428	-0.00598122	0.016129	0
71.2	-0.0015954	0.00700562	-0.0440128	-0.0354674	-0.0550469	-0.018165	0.0265683	0.024422	-0.0102797	0.0301411	0
71.4	0.0312229	-0.0162564	-0.0511566	-0.0480631	0.00381176	-0.0167338	0.034768	0.0157065	0.0295835	-0.0379898	0
71.6	0.0149887	-0.0245798	0.0115361	-0.0158781	-0.00136734	0.0105474	0.0049348	0.0283993	0.00586589	-0.0583988	0
71.8	0.00854865	-0.0403373	0.043632	-0.054874	-0.0432743	0.00707971	0.0344579	0.0209025	0.00263394	0.00360771	0
72	0.017921	0.00762298	0.0113631	0.00183432	-0.0201496	0.016479	-0.000292777	0.0285474	0.00449711	-0.00263373	0
72.2	0.00871784	0.0387557	0.00282492	0.0503474	0.0083105	0.0183513	-0.0200705	0.0413827	0.0125457	0.0201195	0
72.4	-0.0129883	0.0247268	0.0110975	0.0329113	-0.0291213	-0.0103908	-0.0167464	0.000631927	0.0122679	0.0315031	0
72.6	-0.0158908	-0.0312537	-0.00265461	-0.00426758	-0.0322568	-0.0370319	-0.0402439	-0.0396522	-0.00631333	-0.0142727	0
72.8	-0.00119509	-0.0947085	-0.0300621	-0.0248677	0.0495336	-0.0061485	-0.0216074	0.0125421	-0.0247865	-0.0230684	0
73	-0.00116562	-0.0604896	-0.0467543	0.0118448	0.040713	0.0496526	0.0591001	0.0647605	-0.0224164	0.00234106	0
73.2	-0.0199202	-0.0133201	0.0377969	0.0577369	-0.00223906	-0.0117445	-0.0142068	0.0107265	0.0105326	0.00244805	0
73.4	-0.0239412	0.0435195	0.0807494	0.0202244	-0.00668291	0.00135297	0.0187986	-0.0207824	-0.0199029	-0.00501684	0
73.6	-0.00773107	0.0115336	0.0237539	0.0180758	-0.00376343	0.000830256	-0.0127328	0.000991472	0.000853919	-0.00740813	0
73.8	-0.0089566	0.00932023	-0.0277657	0.0250346	-0.0139126	-0.0109691	-0.0245323	-0.0218376	0.0153738	0.00356006	0
74	-0.0204834	0.0644746	-0.0141553	-0.0347166	0.00416942	0.0361033	0.0506258	-0.047405	-0.021912	0.0282401	0
74.2	0.00385893	0.0252929	-0.0106303	-0.0552601	0.0413376	0.0421229	-0.0300485	0.0100597	0.00833306	0.0322984	0
74.4	0.0299306	0.0501733	-0.0295147	-0.00321389	0.0157808	0.00159097	-0.0397606	-0.00415437	0.0128044	-0.0141735	0
74.6	0.0314071	-0.022239	0.0394982	0.0185994	0.0192683	-0.00695678	0.0366016	0.0403701	0.072995	-0.0436778	0
74.8	0.0190237	0.00446076	0.0487074	0.00361771	-0.0196844	0.00479011	0.0363719	0.0419274	0.00449288	-0.0132653	0
75	-0.00512454	0.0142799	0.0295957	-0.0206912	-0.0407478	0.00192888	-0.0255729	0.00835456	-0.0197202	-0.00132017	0
75.2	-0.0193286	-0.0303346	0.0173289	-0.0208653	-0.00502738	-0.0193731	-0.0588922	-0.00991208	0.00832034	-0.000301398	0
75.4	0.00233279	-0.0200844	-0.0355859	-0.0272216	0.0149125	-0.0200511	-0.0205741	-0.0177724	-0.0432421	0.0230733	0
75.6	0.0214333	-0.0474205	-0.0549709	-0.0441324	0.0108856	0.00972952	0.0418195	-0.00914804	-0.0270507	0.00237746	0
75.8	-0.0165191	-0.0166614	0.00198905	0.0981759	0.0142693	-0.0139818	-0.0328219	-0.0305582	-0.0607299	0.0136537	0
76	-0.00557718	0.0636827	-0.0071151	0.0446321	-0.0111893	0.0121032	0.0266367	-0.0279141	-0.0241054	0.0422837	0
76.2	0.0386387	0.0598731	0.0107407	-0.0281305	-0.0330038	0.0100511	0.0555618	-0.00287165	0.0314673	0.0289162	0
76.4	0.0128697	0.00932719	0.0186439	-0.0195754	-0.0131124	0.00295098	0.0673523	0.016109	0.00683395	0.00834578	0
76.6	-0.018159	-0.014777	-0.024283	-0.0305437	0.00234598	0.0276695	0.062521	0.0266002	-0.00721158	0.0054098	0
76.8	0.0284462	-0.0189142	0.00635166	-0.0157965	-0.0134244	0.0238158	-0.034127	0.0370753	0.0479323	-0.0267064	0
77	0.00293904	0.0190428	0.0697382	0.0789434	0.000130717	0.00818386	0.0304587	0.0383549	0.0110812	-0.0532595	0
77.2	-0.0212661	-0.00310737	-0.0500104	0.0538576	-0.031918	-0.0214992	0.0759802	0.0162298	0.0127465	0.0237662	0
77.4	-0.0120088	-0.0360637	-0.0109695	0.00890782	0.00201327	-0.0131293	-0.0160909	-0.0346719	-0.0143157	-0.0136946	0
77.6	-0.0218611	-0.0108486	0.00725705	-0.0217493	0.0200006	0.0184703	-0.0374103	-0.0270388	3.96374e-05	-0.029865	0
77.8	-0.0260808	-0.00752685	-0.0195996	-0.0440514	-0.00541274	0.013457	-0.0541022	0.00203165	0.0316686	0.0154797	0
78	-0.0151716	-0.0437455	0.0184203	-0.0231016	-0.00603599	-0.0235071	-0.098607	-0.0358523	0.00267073	-0.00424845	0
78.2	-0.0352007	-0.0284796	-0.0205413	0.0253332	0.00493978	-0.037616	0.0211561	-0.0645815	-0.022102	-0.0305097	0
78.4	-0.0109465	-0.0431485	-0.0106853	0.0283454	0.0178638	-0.0409276	0.00273029	-0.00276121	-0.0253046	0.00318893	0
78.6	-0.0187596	0.0123395	-0.0330254	0.0138293	-0.000186964	-0.0370743	-0.0894207	-0.00985128	-0.00768829	0.00663765	0
78.8	-0.0160557	-0.0272324	-0.00311586	-0.0451955	0.0239308	-0.0255248	-0.0448725	-0.000868511	0.0186053	-0.00252962	0
79	0.00326579	-0.0544972	0.0195655	-0.0363452	-0.00501947	-0.0233034	-0.00551143	0.0492477	0.0224591	-0.0141861	0
79.2	0.00765237	0.0216585	0.0127559	0.0189669	-0.0560338	0.00541334	-0.0128498	0.0426225	0.0152018	0.016021	0
79.4	-0.000934041	0.0702296	0.0328022	-0.0126806	0.00330796	0.0428112	0.0490179	-0.0084216	-0.00482807	0.0497157	0
79.6	0.00353808	0.0430196	0.01589	-0.0430316	0.0560531	-0.00207601	0.0536636	0.00122416	-0.0496407	-0.0236436	0
79.8	0.0450931	-0.01808	-0.0112756	0.00768072	0.0156308	0.00525319	-0.00806384	-0.0158479	0.0161625	0.0168125	0
80	0.0477109	0.0616234	-0.0445	-0.0261538	-0.0130869	0.020461	0.0267716	0.00453451	0.0290807	0.0237601	0
80.2	0.0359699	0.0558064	-0.0141647	0.00289852	-0.00117495	0.0170666	0.0253968	-0.00577237	-0.0142573	0.0136219	0
80.4	0.013549	-0.0225313	-0.00386449	0.0139528	-0.0129271	0.00198516	-0.0169186	-0.0336662	-0.00286856	0.0081869	0
80.6	-0.00562509	-0.0374119	-0.03546	-0.0319223	-0.0407589	0.00398674	-0.00107829	-0.0451529	0.0043206	-0.00724598	0
80.8	0.00117131	-0.0545638	-0.0134202	0.0302191	-0.0210367	0.0289089	0.0117423	-0.0356981	-0.0465335	-0.00869849	0
81	-0.0248628	-0.0466752	-0.0207313	0.0347844	0.0147144	0.0182711	-0.0264359	0.0492991	0.0154329	-0.0126188	0
81.2	-0.0122217	0.018218	-0.0180983	-0.041131	0.0435228	0.00353577	0.00092969	-0.00506008	-0.00435926	-0.00347966	0
81.4	-0.0470637	-0.0103839	0.0162217	-0.0779986	-0.0191213	0.000316564	-0.00509287	0.0265581	-0.00638516	-0.0309388	0
81.6	-0.0501447	-0.015506	0.0192968	0.00631858	0.00121447	0.0128772	-0.00515841	0.0605503	-0.0105131	-0.0106989	0
81.8	-0.0193915	-0.00387657	0.0189386	0.0503213	0.0476349	0.00247389	-0.00126583	0.00539634	0.000951322	0.00396995	0
82	-0.0277671	-0.0457731	0.0275989	0.00406142	0.00152988	-0.0277663	0.00534038	-0.00815419	0.0125885	-0.0342977	0
82.2	-0.020998	-0.0283508	-0.0264205	0.03529	0.00739213	-0.0232728	0.0748866	0.0310686	-0.0713796	-0.00344335	0
82.4	-0.000288577	-0.0214319	-0.0285929	-0.00825549	-0.0137819	-0.0274994	0.0375909	-0.0194217	-0.0413005	-0.00193442	0
82.6	-0.00038644	0.0423561	0.0296102	-0.0191844	0.0106536	0.00416552	0.00796391	-0.0251642	-0.00100334	-0.0165507	0
82.8	0.0311046	0.0734826	-0.0391362	-0.0103273	0.00665556	-0.0206095	0.0235709	-0.0336615	-0.0151298	0.0107265	0
83	0.0305236	0.056998	-0.0388559	-0.0426984	-0.0288859	-0.00598865	-0.0470189	-0.0190368	0.00497562	0.0472857	0
83.2	-0.00215296	0.0155426	0.0525356	-0.016684	-0.0140299	0.0375712	-0.122518	0.0187807	0.0273453	0.0273341	0
83.4	0.00603867	-0.0229361	0.0302601	0.0675025	0.019025	0.00532668	-0.0420159	0.0051721	0.000927037	-0.00329586	0
83.6	0.00876322	0.00377955	0.0371538	0.000448342	-0.0126462	0.0170721	0.0193601	-0.0242445	0.0479328	0.0295477	0
83.8	0.0430836	-0.0264911	0.0178397	0.00369985	0.0264354	-0.00956159	-0.0215594	-0.0503939	0.0397603	-0.00811036	0
84	0.0277926	-0.0496449	0.00473612	0.0230394	-0.00342593	-0.0234311	0.000987286	0.00236129	0.0376757	0.00546399	0
84.2	0.00099141	-0.0507447	-0.019274	-0.0067952	-0.0116428	0.00812012	0.0318482	0.035856	0.03927	-0.000326735	0
84.4	-0.0155637	-0.0234079	-0.0337564	-0.00980498	0.0107559	0.0341837	0.0285978	0.0105722	-0.00246886	-0.0331563	0
84.6	-0.0220384	0.0247122	-0.0269711	0.0289729	-0.0179046	0.0143875	0.00927463	0.0165786	-0.0440323	-0.0296651	0
84.8	-0.000225018	0.0762728	-0.0018289	0.0170741	-0.0428178	-0.00641908	0.00187393	0.0575259	-0.0263134	-0.0163969	0
85	0.00158297	0.133186	0.0730718	-0.0121419	-0.0125699	0.025497	0.0697566	0.0240366	-0.0160798	0.00724784	0
85.2	0.00698828	0.0130639	-0.0228114	-0.00557375	0.0228732	0.037228	-0.0353822	0.0152705	-0.016504	0.0232689	0
85.4	0.0175069	-0.0213783	-0.0303117	-0.0388137	0.00871231	-0.0142161	-0.0350086	-0.0106243	0.0139278	0.0160555	0
85.6	-0.00802558	0.0546666	0.0194538	-0.0126479	-0.0218376	-0.000853526	-0.00559949	0.000519547	-0.000998241	-0.0103147	0
85.8	-0.000878345	0.0360888	0.0315481	0.0363068	-0.0239725	0.0327688	-0.0166452	-0.00734407	-0.0511607	-0.00390996	0
86	0.0383596	-0.0581543	0.0298071	-0.00230028	0.00228898	-0.0136374	0.0071663	-0.0675473	-0.0355386	0.0220578	0
86.2	-0.0121055	-0.040533	-0.0202989	-0.00472436	0.0255923	-0.0270513	-0.0168059	-0.0316479	0.0132516	-0.0073413	0
86.4	0.00522703	-0.0147876	-0.0242531	0.0648739	0.00426125	-0.020265	-0.00391535	-0.00106146	0.00114901	-0.00622419	0
86.6	0.0153055	-0.00327511	0.0071721	0.0688405	-0.00834364	-0.00228771	-0.0242522	0.0661377	0.0216324	-0.00318069	0
86.8	0.00529053	-0.0325318	0.0138921	0.0435554	-0.000906023	0.0120024	-0.00422878	0.0217416	0.0825414	-0.00672437	0
87	0.0056348	0.00427577	0.0117431	0.00403828	0.00642589	0.0120782	0.0353482	-0.0225405	0.0256338	0.0037424	0
87.2	0.00832956	0.0385946	0.00294358	-0.0361655	0.00398299	0.00250164	0.0322291	0.00799813	-0.0286353	-0.00200527	0
87.4	0.000794015	-0.0417047	-0.00658408	-0.0404468	-0.00704715	-0.0100389	0.0132655	-0.0108448	0.0296223	-0.0105115	0
87.6	0.00429447	-0.0270268	0.0412764	-0.0473677	-0.00609494	-0.0206342	-0.000134483	-0.021612	-0.0812233	0.0432564	0
87.8	0.0105948	-0.0238865	0.00484235	-0.0230062	0.0533319	-0.0104864	0.00481609	-0.0292186	0.000245639	-0.0235116	0
88	0.0078843	0.00316581	-0.0480441	-0.0150801	0.0543507	-0.0144857	0.0319075	-0.0527491	-0.00490299	0.0131245	0
88.2	0.0280969	0.0426106	-0.0238187	-0.0285085	0.0208719	0.013305	-0.0153693	-0.0288409	-0.0105836	0.0376239	0
88.4	0.0287291	0.0563972	0.0430068	-0.0105577	0.0112249	0.011491	-0.03098	0.0121322	0.0232231	0.0015086	0
88.6	0.00197541	0.0734826	0.0593378	0.00606916	0.0160651	-0.0198548	-0.000610258	-0.00271952	0.00233481	0.00147928	0
88.8	0.00557321	0.0894782	-0.00875589	-0.0199675	0.0120488	0.0138429	-0.0516964	-0.0283967	0.0104225	-0.00300373	0
89	-0.0258995	0.00569071	-0.0900072	0.0308823	-0.012727	-0.0230108	0.0217185	-0.0022856	0.0325265	-0.019047	0
89.2	-0.0300217	-0.0372059	-0.0126516	0.0263948	-0.0385281	-0.0217311	-0.039534	0.0184754	-0.0064858	-0.0338993	0
89.4	-0.0284969	-0.0483462	0.0492453	0.0460217	-0.0139614	-0.0130259	-0.0299126	0.044795	0.0032174	-0.00974482	0
89.6	-0.0111608	-0.0158904	0.0107155	0.0868401	-0.000332743	-0.00444107	-0.00972269	0.0524239	0.0635818	-0.00497265	0
89.8	-0.00852926	0.00639714	-0.026347	0.0456129	-0.0150436	0.0134883	-0.0270559	0.0408342	0.0522473	-0.0188274	0
90	-0.0461179	-0.0276192	-0.00675679	-0.0251886	-0.0184343	0.0134049	0.0409813	0.0416607	-0.015729	-0.00943774	0
90.2	-0.0332122	-0.021852	-0.00219254	0.0118151	-0.0167498	-0.0027568	0.0846466	0.0373819	-0.0150203	-0.0146409	0
90.4	0.0328121	-0.0180767	-0.0243984	0.0257271	0.0388049	0.00419993	0.00598619	0.0219961	-0.0444186	0.00506698	0
90.6	0.029051	-0.0352684	0.0367729	0.0472411	0.0137501	0.0313751	0.00128533	0.0085888	-0.0104945	0.00792663	0
90.8	0.0020699	0.000549832	0.087971	0.0148965	-0.0303867	0.00134468	0.02509	-0.0090011	-0.00937034	-0.00804158	0
91	0.0102484	0.0292754	0.04588	-0.047113	-0.0296539	-0.0283625	0.0106471	-0.0105013	-0.0279228	0.00328006	0
91.2	-0.00286799	-0.00609958	0.00225954	-0.0632058	-0.014936	0.00533379	-0.0274527	-0.0237383	-0.0175611	0.0429784	0
91.4	-0.0416775	-0.0276787	0.0105653	-0.0451899	-0.00945938	0.0302823	-0.0270009	-0.051986	-0.0302007	0.0396616	0
91.6	0.000584771	-0.00782393	-0.0458142	-0.0251876	-0.00550432	-0.000845952	0.0478398	-0.00525816	-0.04185	-0.0191427	0
91.8	-0.0140804	0.0059758	-0.0629131	-0.0122675	-0.0137731	-0.0331939	-0.0481513	-0.0398096	-0.0465914	0.00637784	0
92	-0.0214609	0.0091844	-0.028253	-0.036513	-0.01518	-0.00490432	-0.0146421	-0.00961382	0.00881212	0.00417356	0
92.2	0.00454904	-0.0469453	0.00580411	-0.0545041	0.0137312	0.0316789	0.0436998	0.0293534	0.00668463	-0.00419473	0
92.4	0.0233235	-0.0454349	0.0259956	-0.00912548	0.0360195	0.0349469	0.0158918	-0.000773365	-0.00741622	-0.0129872	0
92.6	0.0210453	0.0157553	0.000114779	-0.00238388	0.0114582	0.01156	0.00249808	-0.0279181	0.0352594	-0.0152945	0
92.8	0.0185857	-0.0486128	-0.0633328	-0.0764967	-0.013162	-0.0317728	-0.0151333	-0.0232328	0.0250328	0.0296614	0
93	0.0254959	-0.040467	-0.000890013	0.0461243	0.0170442	-0.0438909	-0.0508439	-0.043177	0.0240406	-0.0203584	0
93.2	0.01944	0.0418202	-0.00286186	0.0404779	0.00977695	0.0120948	0.0133828	0.0110648	-0.0336406	0.00462905	0
93.4	0.00963689	0.0506023	-0.0316066	0.0156531	-0.0076846	-0.0222311	-0.0554827	-0.000517631	-0.0292211	0.0159814	0
93.6	0.00537113	0.0512463	-0.0265636	0.051676	-0.0148175	-0.043592	-0.0604563	-0.0278156	0.0231871	-0.0251913	0
93.8	-0.00462924	0.0651251	0.018128	0.046891	0.00184362	-0.007576	0.0347202	-0.0070115	0.0299464	-0.0289923	0
94	-0.0135559	0.0205693	0.0492522	0.00752065	0.0209062	-0.0210565	-0.00113259	0.000888868	0.0126424	0.0159138	0
94.2	0.00699951	-0.00339621	-0.0051147	0.0124636	-0.0123896	-0.0180486	-0.00362519	0.0158954	0.0227214	0.0267903	0
94.4	0.0227509	-0.00945993	-0.000874697	-0.0583195	0.013186	-0.0176643	0.0234791	0.0241244	0.00934475	0.0191903	0
94.6	0.0015606	0.0258375	0.0258148	-0.00649079	0.00636472	0.0176305	0.000763341	0.0543987	0.0026478	-0.0226598	0
94.8	-0.0360394	0.012948	-0.0647616	-0.0163956	-0.00101286	0.0114039	-0.0193029	0.039469	0.0107992	-0.0516884	0
95	-0.0229268	-0.0763151	-0.0233874	-0.0331962	-0.00998561	-0.00178648	-0.00908952	-0.0152229	0.00995377	-0.0297261	0
95.2	0.000269701	-0.082295	0.0915993	0.00548206	-0.0256544	0.0199666	0.0252271	-0.0239226	-0.0143947	0.00364133	0
95.4	-0.0297268	0.00946168	-0.0358673	-0.038652	-0.00168311	0.00992625	0.0563654	0.00137355	-0.0325168	0.000115372	0
95.6	-0.00680515	-0.0592167	-0.0041504	0.00957254	0.00760749	-0.00399915	0.00227197	-0.0274757	-0.00955372	-0.00448606	0
95.8	-0.0212345	0.0210295	-0.000736474	0.00339057	-0.00694791	0.016129	-0.0164655	-0.0116429	-0.0188819	0.0252804	0
96	-0.0232809	0.0519764	0.0229961	0.0351031	-0.0127889	0.0290269	-0.0137034	-0.00745465	0.0148168	0.0375949	0
96.2	-0.0102055	-0.017835	0.0150383	0.0371834	0.00503144	0.0156171	0.0181592	0.0113005	0.0527292	0.0149786	0
96.4	0.00316969	-0.0689158	-0.00557624	-0.0291152	0.00398576	0.0292952	0.0401312	0.0223056	0.0373442	0.012379	0
96.6	0.015813	-0.0538302	0.0216723	-0.0217228	-0.0160503	0.0418098	0.03003	0.00250615	0.0147428	0.0304628	0
96.8	0.0018182	-0.0035804	-0.000124742	0.0462953	-0.000247623	-0.0192125	0.0406978	0.0170677	0.0120769	0.00709511	0
97	-0.018838	0.00694633	-0.04359	-0.0481114	-0.00102904	-0.00396921	0.00998806	-0.00832782	-0.0340922	-0.0074971	0
97.2	0.000190569	0.0167822	-0.0460679	0.0505633	0.0101368	0.00533424	0.0233109	0.0234967	-0.0395783	-0.0322613	0
97.4	0.0639963	0.0674173	-0.04638	0.0613962	0.0152725	0.0115745	0.00491302	0.00968616	-0.0437617	-0.0253185	0
97.6	0.044861	0.0722112	-0.0109923	-0.0224283	0.0237073	0.0235669	-0.00724957	0.0184134	-0.0438257	0.0128334	0
97.8	-0.00812527	-6.03968e-05	0.0444897	-0.00873859	0.006367	0.00185779	0.000668601	0.0137168	-0.00395387	0.0184594	0
98	0.0316423	-0.0167348	0.0406531	0.00788625	-0.0331245	-0.0383967	-0.0411837	-0.0558443	0.0278706	-0.0149176	0
98.2	0.028098	0.0608896	0.033757	-0.0428799	0.00858922	-0.0209682	-0.0460118	0.0443779	0.00785419	-0.0139808	0
98.4	0.014244	0.0219084	0.0577507	0.00132328	0.011028	0.0123609	0.0335517	0.0417455	0.0343755	0.00387525	0
98.6	0.0183578	0.0528469	-0.0431287	0.00833351	0.0015425	0.0264175	0.000235993	-0.000362349	0.0444635	0.0253489	0
98.8	0.00139438	0.014543	-0.0306452	0.000191029	-0.000742161	-0.0106126	-0.0286288	-0.0157891	0.028052	0.0220588	0
99	-0.0100336	-0.0316246	0.062966	0.0305578	-0.00779309	-0.0163435	-0.00412784	-7.54974e-05	0.0152979	-0.00454448	0
99.2	0.0139956	0.00336833	0.0252034	0.0291437	-0.00825862	0.00278533	-0.0240245	0.0365073	-0.00466678	-0.0093497	0
99.4	0.0174435	-0.0321011	-0.0178792	-0.00239959	0.0208137	-0.0282244	-0.0260184	0.042629	-0.0173601	0.00531873	0
99.6	-0.0142169	-0.0165824	0.0524542	0.0539655	0.0522854	0.0315352	0.0714906	-0.0108109	0.0317536	-0.0249087	0
99.8	-0.011208	-0.0218377	0.0159375	-0.037579	0.0151605	0.01636	0.00790702	-0.00784316	-0.0142591	-0.00171286	0
100	-0.00919496	-0.0472879	-0.0436354	-0.0485045	-0.0181516	0.00404685	-0.0481765	-0.0343603	-0.0352518	0.00996839	0
100.2	-0.0317614	-0.0257582	-0.0352454	0.00449856	-0.0280314	-0.0086219	-0.0265284	-0.0260198	-0.0161614	0.0215295	0
100.4	-0.0481664	-0.0156815	0.0156837	-0.013269	-0.0222234	-0.014656	-0.0176286	0.00312765	0.0117271	0.0232689	0
100.6	-0.0295029	-0.0254774	0.00972548	-0.0129812	-0.00899933	0.0052315	-0.0234832	-0.0295289	0.0124174	-0.0272638	0
100.8	-0.00551269	0.047885	-0.0625665	0.0526793	-0.00876155	-0.0205689	0.00603551	-0.024475	-0.0484562	-0.0518971	0
101	-0.0340305	0.0131656	0.0189574	-0.0166222	0.0225474	-0.0164194	0.0111176	0.0141198	0.0165269	0.00170973	0
101.2	-0.0251875	-0.0126326	0.00060595	-0.000172213	-0.00618908	-0.037188	0.033893	-0.0126265	0.00653199	0.00955799	0
101.4	-0.0064573	-0.032673	-0.0489562	-0.0389229	-0.00286616	-0.038454	-0.0221195	-0.0318518	-0.0101498	-0.0395036	0
101.6	-0.00942175	-0.0120867	-0.014275	-0.0338897	0.0251545	-0.0216673	-0.0322601	-0.0341156	0.00605365	-0.0238132	0
101.8	0.00354628	0.0341833	0.000247881	0.0207349	0.0150768	-0.00418242	0.0404973	-0.0212385	0.0100673	0.034207	0
102	0.0194201	0.0216236	-0.0565099	-0.0505356	-0.00706296	0.021773	0.0170606	0.0305427	0.0104668	0.00855039	0
102.2	-0.0211477	0.0177512	-0.016742	-0.0338098	-0.0231797	0.0142077	-0.0269947	0.0304068	-0.00579895	-0.0233178	0
102.4	0.00956127	0.038153	0.0433251	-0.0365766	-0.00516844	0.0158352	0.0282895	-0.00152076	-0.0299384	0.016302	0
102.6	-0.00435302	0.0568733	0.0182081	0.0086521	-0.0029409	0.05216	-0.00417611	0.0415073	3.52439e-05	0.0137005	0
102.8	-0.00542609	-0.00890018	0.0266905	0.0725068	-0.021254	0.0350462	-0.0269879	0.0683274	6.49604e-06	0.00793863	0
103	0.0212767	-0.0663484	0.0437942	0.0484746	-0.0138972	0.0235681	0.0270264	0.0493413	0.00660911	0.0134739	0
103.2	0.0286111	-0.0120795	0.00647578	-0.00246701	0.00385231	0.0426567	0.0432056	0.0214869	0.0489254	-0.00357164	0
103.4	0.036569	0.0183924	0.0134016	0.0161754	-0.0079479	-0.00733449	0.00733246	-0.0321463	0.00601062	0.00220235	0
103.6	-0.00261225	-0.0707208	0.0230527	-0.0275968	0.0193536	0.00606738	0.0125206	-0.033847	-0.0467705	0.0311361	0
103.8	0.019255	-0.0669285	0.0554353	0.0596464	0.0260311	-0.0158326	-0.001596	-0.00942595	-0.0438739	0.0313404	0
104	0.020081	0.031096	-0.0254369	0.00410952	0.00506481	0.00601072	-0.0100458	-0.006926	-0.0219252	-0.000576905	0
104.2	-0.00130276	0.0275201	-0.0682926	-0.0381176	-0.0126566	0.00748649	-0.00197895	-0.032468	0.0187882	-0.0175646	0
104.4	-0.00261955	-0.0285668	-0.0390499	0.0296467	-0.00441016	-0.0469288	0.0249413	-0.0508823	0.0366861	-0.0290321	0
104.6	-0.00754198	0.0182804	-0.0460866	0.0175866	0.0138591	-0.0653105	0.0427834	-0.0361652	-0.00110898	-0.0375398	0
104.8	-0.0151264	0.0434481	0.0201802	-0.000147085	0.00592924	-0.0426017	-0.0107103	-0.0112301	-0.0138576	0.00144805	0
105	0.0071054	0.0179353	0.0487821	-0.0147636	-0.00945982	0.00351582	-0.0521289	-0.00570848	-0.0155218	-0.014361	0
105.2	-0.0166953	0.0617045	0.0324544	-0.0178544	-0.0277759	0.0188599	-0.0499794	0.0166342	-0.0228635	0.00324576	0
105.4	-0.0267057	0.022816	0.0191056	0.00949414	-0.0127049	0.0306662	0.00644459	0.0104381	-0.0276355	-0.00982574	0
105.6	0.00108549	-0.0184978	0.013415	0.000389577	0.0235249	0.026273	-0.00871587	-0.011985	-0.0157775	-0.0163239	0
105.8	0.00914311	-0.00952098	-0.0207828	-0.024224	0.0225743	0.0230926	-0.0223909	-0.00614942	0.0284602	0.0188383	0
106	-0.0164268	-0.0681737	-0.0374783	0.00702562	-0.0181548	0.0457811	0.0618497	0.0250446	0.0702371	0.0212921	0
106.2	-0.0242307	-0.0462766	0.039381	-0.0174598	-0.0190718	0.00311738	-0.0451634	0.0529555	0.033656	0.0268129	0
106.4	0.00867473	-0.0501251	-0.0191308	-0.0317219	0.0295674	-0.000792433	-0.0216335	-0.0190186	0.00826221	0.00986706	0
106.6	0.015077	0.0272506	-0.0196564	-0.0068639	-0.0127174	0.00787925	0.0259498	-0.0179194	-0.0378232	0.0122428	0
106.8	-0.00132159	0.00609893	-0.00405911	0.0252967	-0.0253244	0.00441252	0.0344262	0.0146308	-0.0417299	-0.00182319	0
107	-0.00307304	-0.0378141	-0.0248984	-0.031238	0.0131219	-0.0332631	0.0069113	-0.0102911	-0.00993894	-0.00328889	0
107.2	0.00718418	0.0499121	-0.0280707	-0.0827571	0.00982929	-0.0621631	-0.0324525	-0.0347261	-0.00633152	0.0140372	0
107.4	0.0121481	0.0481007	-0.0185605	0.0188487	0.0165382	-0.0168752	-0.0191526	-0.0155008	0.00868493	-0.0176683	0
107.6	0.0145629	-0.0185685	0.0498231	-0.0173749	0.013513	-0.0229266	-0.0220595	-0.0150814	0.0366182	0.0166712	0
107.8	-0.00238169	-0.0231688	-0.0232788	0.00988467	-0.00281362	-0.0368463	-0.0135399	-0.0103027	0.0109485	0.0160218	0
108	0.0136563	0.0127551	-0.0465618	0.0509158	-0.0178439	-0.026216	-0.0163793	0.00706337	-0.00389244	-0.00542435	0
108.2	0.0165127	0.0236534	0.0180189	0.0489006	-0.0116434	-0.0233922	-0.01625	0.0186816	-0.00390133	-0.0284905	0
108.4	-0.00589651	0.0099178	0.0251406	0.0196203	-0.0030392	-0.0110161	-0.00458809	0.0220103	-0.00138437	-0.0132604	0
108.6	0.0014139	-0.0131913	-0.0148042	0.0110388	6.55698e-05	0.0119739	-0.00498466	0.0100084	0.00849852	0.0230063	0
108.8	0.00110255	-0.0256888	0.0106663	0.055455	0.0278531	-0.0180919	-0.00225006	-0.030315	-0.012794	-0.0272832	0
109	-0.017207	0.0747948	0.0346056	-0.0413807	0.0123016	0.0244015	0.0100929	-0.0275577	-0.0153936	-0.00892334	0
109.2	-0.0174089	0.0282844	0.0443556	-0.056201	-0.000374142	0.0248258	-0.00486857	-0.00537483	-0.024208	0.0145406	0
109.4	-0.0274709	-0.0697507	-0.00347338	-0.00919752	-0.0110943	0.0099689	-0.0429581	0.0206258	0.0050248	0.019309	0
109.6	-0.0274576	-0.085702	-0.0132275	0.00195991	-0.00824835	0.0156773	-0.0233554	0.0274125	0.00822297	0.00807608	0
109.8	-0.01019	-0.0357575	0.00668081	-0.00381478	0.00278773	0.0231907	0.0395665	0.00931107	-0.0171326	0.00021536	0
110	-0.0177769	0.0424665	-0.0444599	0.00216493	-0.0043862	0.0180483	0.0346476	0.00258364	0.0177757	0.00556102	0
110.2	-0.0116578	0.0662554	0.0061349	-0.000806101	-0.00114306	-0.0250657	-0.0130712	0.0145834	-0.00198578	-0.0305758	0
110.4	-0.00637928	0.0215097	0.00100857	-0.0324744	-0.0727096	-0.0117488	-0.0633536	0.0118995	-0.00570764	-0.00942994	0
110.6	0.00166394	0.0461602	-0.00137298	-0.0333826	-0.0450689	0.00303149	-0.0273515	0.00753309	-0.0264918	-0.00872251	0
110.8	0.0175244	-0.0130528	-0.0205679	0.017217	0.00990515	0.0174892	0.0573663	-0.000999515	0.00111808	-0.00649904	0
111	0.0124017	-0.0991725	-0.00258957	0.0184236	0.00246869	0.0239068	0.067127	0.00432141	0.0503123	0.000362062	0
111.2	0.00106685	-0.0232435	0.0692653	-0.00398542	0.0119821	-0.00436226	0.00563506	0.0120924	0.0324842	-0.0327446	0
111.4	0.0231218	0.0503345	0.0230815	0.0670392	0.0457164	-0.0189897	0.00397187	-0.0278736	0.00311281	-0.0459916	0
111.6	-0.00513813	0.0331397	-0.0336539	-0.00136422	0.0177116	0.00300227	0.0330746	-0.0365529	-0.019463	0.0012159	0
111.8	0.0191015	-0.0020981	0.00606603	0.000558767	0.00777642	0.000167923	-0.000383983	-0.000149275	-0.0264185	0.0304401	0
112	0.02973	0.0245226	0.00227826	-0.0162849	0.0225184	-0.0161151	0.012189	-0.0233924	-0.0183416	-0.000585904	0
112.2	0.00272475	-0.00945294	0.00664531	-0.0263483	0.00869399	-0.00517998	0.0376647	-0.0211786	0.0230404	-0.0061245	0
112.4	-0.00403975	-0.0627346	0.00136717	-0.013997	-0.0188605	0.0121695	0.0585528	0.00983045	0.0173098	0.0205051	0
112.6	0.0043239	-0.0104557	-0.0951876	-0.0328264	-0.00972762	0.00365555	0.0730066	-0.0137438	-0.0428128	0.005575	0
112.8	-0.00986139	-0.0153435	-0.0524702	0.0450808	0.00499251	0.00658189	-0.0419848	0.027375	0.0326208	0.00919358	0
113	0.00995389	0.0532737	0.0417405	0.0413548	-0.00772083	0.020323	0.0114639	-0.00429914	0.0573489	0.0427688	0
113.2	-0.00287731	0.0228239	0.00117118	-0.0214534	-0.0201298	0.0141387	-0.0228805	0.00812475	0.0124367	0.0221575	0
113.4	-0.0111262	-0.0219248	0.0146773	-0.0155579	0.017235	-3.84056e-05	-0.0425377	0.0277738	-0.0337448	0.0213318	0
113.6	0.00382918	-0.00707047	0.0615009	0.0679126	0.033848	-0.0128783	-0.0292268	0.0275013	-0.0246617	0.0406591	0
113.8	0.0195449	0.00215645	-0.00101138	0.0590036	-0.0115387	-0.00994817	-0.0557178	0.0140413	0.00511973	0.0130999	0
114	0.0344649	-0.00716344	-0.0362637	-0.0496475	-0.0239592	0.0238989	-0.00758878	-0.0201345	-0.00207891	-0.0152169	0
114.2	0.0165303	-0.0159565	0.013229	0.0385531	0.00332138	0.0286449	0.0225545	0.0293169	0.0152112	0.00061592	0
114.4	0.0186664	0.0216027	0.0137821	-0.0141824	0.0149401	-0.0259944	-0.0123234	0.0190705	0.00107898	-0.00314494	0
114.6	-0.02711	0.0416545	0.00931271	0.0258558	0.0288275	-0.0182472	-0.0224751	0.00249217	-0.0325371	-0.0223146	0
114.8	-0.023298	0.028295	-0.027255	0.022633	0.010036	0.00273414	-0.025931	-0.0154865	-0.0276119	-0.0219784	0
115	0.0158243	-0.00775414	-0.0106874	-0.0667926	-0.00533917	-0.00349393	-0.00874776	-0.0426896	-0.0225631	-0.00571801	0
115.2	-0.0209574	-0.0182076	0.056785	-0.0291956	0.0245535	0.00941348	0.0466985	-0.0217625	-0.0331257	-0.000710269	0
115.4	-0.0412462	0.0378607	-0.0356625	0.013381	0.0115965	0.00836713	0.0376692	0.0405686	0.0202571	-0.0111446	0
115.6	-0.0153808	-0.00130733	-0.0150622	0.010429	-0.0153378	-0.00904914	0.020337	0.048845	0.0266193	-0.0222774	0
115.8	0.0350671	-0.0186007	-0.00852093	-0.0103874	-0.0293468	-0.0352048	0.0272956	0.00892396	0.0151719	-0.00911973	0
116	0.0372533	-0.0117494	0.019645	-0.0502001	-0.0237397	0.0019041	0.0168522	0.0310177	0.0298103	0.019995	0
116.2	0.0182426	-0.0341524	0.0770336	-0.0177001	0.00120262	0.0190227	-0.0206792	0.0473473	0.0373656	0.03158	0
116.4	0.0217552	-0.0314536	0.0429577	0.0528875	0.0200625	0.00223492	-0.0166934	0.0182062	0.0180047	0.0291936	0
116.6	0.0208481	0.0196497	-0.0596969	0.00951248	-0.00969625	0.0247741	0.0264151	0.0237346	0.00203133	0.0211864	0
116.8	0.00721229	-0.0142143	-0.0372008	-0.0475001	-0.0459514	-0.0184682	-0.00109691	0.00733167	-0.00404693	-0.0186844	0
117	-0.0241011	-0.0523844	0.00858853	0.0028061	0.0505174	0.00248252	0.0119226	-0.00340184	0.0136843	-0.00722873	0
117.2	-0.0365237	0.0461853	0.00285037	-0.00929094	0.0031955	0.0123411	-0.0533299	-0.0225089	-0.0040448	-0.0106896	0
117.4	-0.0278696	0.0972347	-0.00986182	-0.0204299	-0.00572772	0.00433651	-0.00591683	-0.0512156	-0.0207201	-0.0180165	0
117.6	-0.0102219	-0.00186636	-0.0127433	-0.0312271	0.0423798	0.0126228	0.0344818	-0.0389478	-0.0271836	-0.0103484	0
117.8	-0.00543574	-0.0523975	-0.0318807	-0.0618828	-0.00128264	0.0137063	-0.0380399	0.00073647	-0.0308249	-0.0124217	0
118	-0.0277973	0.0270666	-0.0403405	0.00375849	-0.00428972	-0.00809315	0.0311653	-0.0113228	0.00444043	-0.00651498	0
118.2	-0.0202006	-0.0118587	0.00442926	0.0308948	-0.00281053	-0.00723618	-0.0114634	-0.0275392	0.0230693	0.0279224	0
118.4	0.0318715	0.00952135	0.0368078	0.0119688	-0.0058738	0.0156858	-0.0132453	-0.0270609	0.00332085	-0.0118402	0
118.6	0.0196059	-0.0031922	-0.0344283	0.0454537	-0.0408855	-0.00472547	0.0242341	-0.0492342	-0.03334	-0.00958757	0
118.8	-0.0238687	-0.0266177	-0.00312229	0.0229886	-0.0154727	-0.00371823	-0.00735368	-0.0663189	0.00182935	-5.19343e-05	0
119	-0.000959226	0.00452723	0.075389	-0.0253703	0.00852752	0.024425	-0.0439312	-0.0625886	0.0363499	-0.0185019	0
119.2	0.0323363	0.00205841	0.00970592	0.0130949	-0.0496514	0.0111128	-0.00972547	-0.0571838	-0.00982022	0.00510631	0
119.4	-0.0184044	-0.0655177	0.0154935	-0.00641134	-0.0171424	0.0147666	-0.029891	-0.034478	-0.0123488	0.0207219	0
119.6	-0.0114136	-0.0670913	0.00324314	-0.0141829	0.00778888	0.0350574	-0.0520089	-0.0359812	-0.0673704	-0.0189269	0
119.8	-0.0279422	-0.00749661	-0.0149411	-0.0312837	0.0266775	0.00326332	0.0260714	-0.0724706	-0.0389523	0.00944759	0
120	-0.0475938	-0.0151034	-0.0462827	-0.0417403	0.0112287	0.0164167	-0.0271344	-0.0544126	-0.00708916	0.00992696	0
120.2	-0.0407303	-0.0260928	-0.0625902	-0.0146127	-0.0306982	0.0806146	-0.0841004	-0.0386142	0.00606378	-0.0169749	0
120.4	-0.027832	-0.0243137	-0.0347266	0.0012261	-0.0390242	0.0872587	-0.0128938	-0.0516814	0.0337366	-0.0117757	0
120.6	-0.0242016	-0.0821513	-0.0307259	-0.0438452	0.000739817	0.0346798	-0.00868495	-0.0237556	0.0366797	-0.000372695	0
120.8	-0.0398857	-0.0336196	-0.0931926	-0.0669829	0.0276041	0.0257316	-0.00109568	-0.0707864	0.0448212	0.037462	0
121	-0.0292784	-0.0350693	-0.0375956	-0.0414105	0.00524002	0.0334177	-0.0195281	-0.159451	0.01345	-0.0218482	0
121.2	-0.00179691	-0.0699073	0.0106598	-0.0554074	-0.00780162	0.0337281	0.00678294	-0.134573	-0.0255878	-0.0277404	0
121.4	-0.00604289	-0.0130561	-0.0535551	-0.0650316	0.010968	0.0258693	-0.00460004	-0.100089	-0.0275033	0.0281716	0
121.6	-0.018883	0.00694767	-0.123279	-0.0382816	0.0139541	0.026152	-0.0483349	-0.11174	-0.0387766	0.0328446	0
121.8	-0.00283072	-0.0856508	-0.0942505	-0.0250133	-0.00741209	0.054085	-0.022929	-0.0939579	-0.0480314	0.00525231	0
122	0.00447826	-0.0818264	-0.0355967	-0.0491349	-0.00209401	0.079147	0.0174024	-0.0880913	0.00764698	0.0129839	0
122.2	-0.0123643	-0.0603621	-0.0128274	-0.096683	0.00103875	0.0322794	-0.00157304	-0.132365	-0.0333471	-0.0490342	0
122.4	-0.0534531	-0.0202723	-0.0243298	-0.0503259	-0.0091215	0.033554	-0.0141812	-0.104027	-0.0450603	-0.0438255	0
122.6	-0.0414299	-0.00300222	-0.0396789	-0.073283	0.00838624	0.0677851	-0.0631202	-0.103043	-0.039848	-0.00937384	0
122.8	-0.0388474	-0.0619075	-0.0261523	-0.0953156	0.0200694	0.068186	-0.0371882	-0.114317	0.000651568	-0.00846875	0
123	-0.0545793	-0.0585899	0.0177204	-0.0363607	0.000183253	0.0809736	0.0506903	-0.102586	0.0371503	-0.0165413	1
123.2	-0.0189632	0.0661387	0.0570099	-0.0244653	-0.0153377	0.155172	0.0256148	-0.0965013	0.0229808	0.00666978	1
123.4	0.00755295	0.0438601	0.0533044	-0.0470124	-0.0223963	0.190539	-0.0188761	-0.0462252	0.0503218	0.0382605	1
123.6	0.061906	-0.0203872	0.0105247	-0.00347938	-0.0314785	0.162848	0.0671598	-0.0517398	-0.01557	0.00102936	1
123.8	0.0190065	0.0259309	0.0445733	-0.0154796	-0.0535386	0.176848	0.123685	-0.0898405	0.0166157	-0.0379395	1
124	-0.0117038	-0.0235738	0.087911	0.0167527	-0.0353968	0.156064	0.0351846	-0.084799	0.0314225	-0.072061	1
124.2	-0.0102527	-0.0549213	0.0615934	0.021329	-0.0311391	0.0820648	-0.010988	-0.083036	0.0188099	-0.0631079	1
124.4	-0.0346655	0.016324	0.0288892	-0.071894	-0.035268	0.0456411	0.024458	-0.0988793	0.0344599	-0.0126394	1
124.6	-0.0304898	-0.0394642	0.0447096	-0.10043	0.0291907	0.0580456	-0.0199234	-0.0645745	-0.000830844	-0.00162733	1
124.8	-0.0139712	-0.0319411	0.00906673	-0.089397	0.0155555	0.0528714	0.0284143	-0.0492691	0.00895595	0.00221119	1
125	0.0035211	0.0134192	-0.0835227	-0.028791	0.0145352	0.00668625	-0.000643096	-0.0130605	-0.0133267	-0.00041415	1
125.2	0.000314136	0.0444755	-0.045374	-0.0716643	0.0414424	-0.0240213	-0.0547001	-0.0172255	-0.0526824	-0.00363963	1
125.4	-0.0380393	0.0433006	0.015932	-0.0415714	0.00437036	-0.0129275	-0.0510996	-0.0684665	-0.0555506	-0.0459936	1
125.6	-0.0236957	0.0367106	0.0164656	0.0229393	-0.0274441	0.00423486	-0.0236078	-0.0829756	-0.034193	-0.0497663	1
125.8	0.0314561	0.0169888	0.0257002	-0.0522097	0.0112442	-0.0116669	-0.0141669	-0.0439329	-0.0218508	0.010399	1
126	-0.0100866	-0.0330077	0.0250473	-0.0653987	-0.0228039	-0.0289263	-0.0143118	-0.0319897	-0.00461224	-0.00778176	0
126.2	0.0292345	0.0174664	0.0493331	-0.0254461	-0.0613488	0.0178882	-0.0405071	-0.0254612	0.0102453	-0.000553154	0
126.4	0.0566738	0.0540189	0.0461855	-0.0155625	0.0148168	0.00477899	0.0247871	0.00350038	-0.0135041	-0.0294576	0
126.6	0.0371281	0.0429584	0.00615815	-0.0341327	0.032249	-0.0211834	0.0380628	0.0547025	-0.0268193	-0.000125362	0
126.8	0.0253669	0.080943	0.0105098	0.0340247	0.00203816	-0.0112906	0.0311812	0.0476697	-0.0210591	0.0062492	0
127	0.0497559	0.0980124	0.0526139	0.0926652	0.0175022	-0.0056769	0.0649983	-0.00283956	0.00363768	-0.0265466	0
127.2	0.0673948	0.0361017	0.0593058	0.0130214	0.0285816	-0.0315173	0.0404986	0.00220457	0.0391691	0.00489906	0
127.4	0.0517295	0.105984	0.0686749	0.0332486	0.0344947	-0.0543519	-0.0130429	0.0291883	0.0100177	-0.0202722	0
127.6	0.0935103	0.0798284	0.040787	0.0790273	0.0372849	-0.036233	-0.0204949	0.0590958	-0.0246481	0.00201838	0
127.8	0.085955	0.0472204	0.019515	0.0189254	-0.00383956	-0.00901752	0.0407892	0.0326299	-0.0381234	0.0225342	0
128	0.0522397	0.0780117	0.0571891	0.0126813	-0.032741	-0.0100116	0.0424244	-0.00163518	-0.0330623	0.0186131	0
128.2	0.0299273	0.0868496	0.0696147	0.0578637	-0.0243028	-0.00742451	-0.0149025	0.00584873	-0.0137679	-0.005987	0
128.4	0.00702081	0.0481749	0.0245942	0.0236837	-0.0139065	0.011483	-0.0189613	0.0219166	0.0307799	-0.0123523	0
128.6	0.0104228	0.033632	0.00231733	-0.0224074	-0.00422774	-0.000647222	0.00901072	0.0207965	0.0614097	0.0255872	0
128.8	0.0375322	-0.000208251	-0.0572475	-0.0242164	0.0113829	-0.023816	-0.014064	0.0351634	-0.0120841	0.0126602	0
129	0.0239828	-0.0285766	-0.0289681	-0.0145741	0.00677202	-0.0449147	-0.00835275	0.0035733	-0.0101349	0.0388341	0
129.2	-0.0112169	-0.021309	-0.0176093	0.00639921	-0.0119045	-0.0424953	-0.0121469	-0.0285327	-0.0205986	-0.00921846	0
129.4	-0.0120391	-0.0400894	-0.0262471	0.0307588	-0.0381178	-0.0387745	0.000908722	0.00209966	-0.0264188	-0.0316359	0
129.6	0.0104358	-0.0540882	-0.0199	0.00364785	-0.0313513	-0.0523467	0.0028335	0.0423099	0.0208989	-0.0145651	0
129.8	0.00834792	-0.0232046	-0.0438836	-0.0336198	0.0211368	-0.0481752	-0.00815665	0.0135772	0.052894	-0.0385018	0
130	-0.00616136	-0.0258925	-0.0637728	0.0173024	0.0403404	-0.00272481	0.0672422	-0.0229751	0.0353582	0.00160481	0
130.2	0.00131288	0.0534581	0.0182635	-0.0293546	0.014158	0.00982647	0.0253267	0.0116785	0.00188802	-0.0252662	0
130.4	0.0119168	0.0775064	0.0503559	-0.0688712	-0.0176046	-0.0375504	0.0323855	-0.0230653	-0.0123689	0.0182004	0
130.6	-0.00675647	0.00308851	-0.00434423	-0.0195724	-0.00824506	-0.00798861	0.0263849	-0.0159514	-0.0469986	-0.0129438	0
130.8	0.00523514	0.00102416	-0.0111883	0.0253386	0.0103763	0.0133197	-0.0189961	0.00691556	-0.0441296	-0.059605	0
131	0.0325179	0.0699113	0.0556397	0.030181	0.00541618	-0.00864876	-0.0284034	-0.00430544	0.0165452	-0.0222209	0
131.2	-0.0102592	0.0362067	0.0566	0.0576408	-0.00596728	0.0386357	-0.0129592	0.0132396	0.0201988	-0.0124252	0
131.4	-0.035403	-0.00616934	-0.0171686	0.0507947	-0.0209715	0.0166322	-0.00764995	-0.0207899	-0.0269834	0.0074171	0
131.6	-0.0186282	-0.00572137	-0.0167185	0.0190796	-0.00097897	0.00806192	0.00180055	0.0132204	0.0220251	0.0328308	0
131.8	-0.00695584	0.0102093	0.0179305	-0.00786666	-0.00991062	0.0384003	-0.0226463	0.026195	-0.00967178	0.0117437	0
132	-0.0220098	-0.0190697	0.0297413	0.0266013	-0.0242358	0.0465963	-0.0142833	0.051279	-0.00620335	0.0125669	0
132.2	-0.049959	-0.0522015	0.00812565	0.057014	-0.0031015	0.0293347	-0.00488702	0.046202	0.0552497	0.006941	0
132.4	-0.0331038	-0.0213997	-0.0133132	0.0157887	0.012661	0.0385105	-0.00256763	0.00323512	0.0358965	-0.0108121	0
132.6	0.0318438	-0.00220392	0.00031517	-0.0301008	-0.00600888	0.0582429	0.063433	0.0571946	0.00900861	0.0421306	0
132.8	0.000709445	-0.0688904	0.000603268	-0.0565626	0.00881998	0.0218688	0.00900345	0.0535587	0.0374994	-0.00577322	0
133	0.0054468	0.00724651	0.00330605	0.0283366	0.0185785	-0.0128842	0.0395199	0.0128388	-0.0120966	0.0115479	0
133.2	-0.00106558	0.0200614	0.0376546	0.00278873	0.0388957	-0.0123436	0.0167434	-0.0376033	0.00589546	0.0314123	0
133.4	0.012725	-0.00687961	0.0340292	-0.0380766	0.0192035	-0.0382638	0.00109757	-0.0168774	0.0273094	0.0351835	0
133.6	0.0358125	0.0304411	1.45428e-05	-0.00607028	-0.0171575	-0.0585254	0.0421882	-0.00894799	-0.0219056	0.00626454	0
133.8	0.0203188	0.0321007	0.0113577	-0.0313078	-0.0065511	-0.0205657	-6.52663e-05	-0.0766052	-0.0381521	-0.0407396	0
134	0.0458192	-5.06067e-05	0.0160479	-0.0407322	-0.0172569	-0.0217262	-0.0685467	-0.0217869	-0.0359363	0.0241751	0
134.2	-0.0145115	0.0292499	-0.00940955	0.0206389	-0.00172254	-0.00907612	-0.0506753	-0.00212584	-0.054535	0.00879476	0
134.4	0.014294	0.00301552	-0.0418817	0.00775915	0.00402441	-0.0188876	0.00619285	0.0120399	-0.0333304	0.00766424	0
134.6	0.0359605	-0.00237045	0.0352406	0.0458507	-0.00321347	-0.0138356	0.00805686	0.0030983	-0.0225525	-0.00824638	0
134.8	0.0117373	0.0368063	0.0426114	0.0491689	-0.00564991	0.00515596	0.0155904	-0.0447321	-0.0313514	-0.00224991	0
135	-0.00316545	0.0434277	-0.0517982	-0.0437646	-0.000392268	0.00414106	0.017496	-0.0617538	-0.00939621	0.0090939	0
135.2	-0.0277455	0.0147509	-0.0154324	-0.0354115	0.00807955	0.00347503	-0.0446659	-0.0134519	0.0331485	-0.0474947	0
135.4	-0.0116872	-0.0203079	-0.0301679	-0.0179158	0.0174055	0.0134725	0.00558412	0.00457811	0.0411057	0.00960007	0
135.6	-0.0107653	-0.040545	-0.0228183	-0.0510378	0.0248854	0.00140301	-0.05065	-0.0194169	-0.0113298	0.0169095	0
135.8	-0.0111046	-0.06366	0.00646457	0.0266404	-0.0247676	-0.03345	-0.0316765	-0.0172418	0.00549524	0.00743565	0
136	-0.0281495	-0.0191012	0.00983039	0.0309354	-0.0380722	-0.0391465	0.00332903	-0.0077376	0.032573	0.0055787	0
136.2	-0.0266602	-0.00854191	0.000467926	-0.0409104	-0.0117061	-0.0100166	-0.0305088	-0.0107461	0.0278266	-0.00487846	0
136.4	0.0119748	-0.0459721	-0.00954537	-0.0050385	-0.00391404	-0.00529962	-0.0145482	-0.0320341	0.0201812	-0.000320078	0
136.6	0.00886844	0.0567237	-0.0339904	0.0154784	0.0354895	-0.0271592	0.0409263	-0.0638776	-0.0204671	0.0108837	0
136.8	-0.00292469	0.02417	-0.00354899	-0.0203723	0.0305754	0.00285642	-0.0347806	0.0178764	-0.00832913	-0.0418815	0
137	-0.0139271	0.02027	-0.0193305	-0.0225931	0.00673704	-0.0210257	-0.038383	0.0587571	0.0204652	-0.0126937	0
137.2	-0.0194235	-0.0113319	-0.0241122	-0.0368302	-0.0178047	-0.00703397	-0.0160983	0.0197227	-0.0141026	-0.00610091	0
137.4	-0.0148125	-0.0127397	-0.0124155	-0.018603	0.00644109	0.0086477	-0.0283524	-0.0178766	-0.0238849	-0.0313557	0
137.6	-0.0137592	0.019206	-0.0140531	0.0141619	0.0273909	0.00138067	-0.00853894	-0.0130796	0.00914247	-0.0316626	0
137.8	-0.0231843	-0.00117765	-0.00990885	-0.0100826	-0.0283961	0.0282211	0.0180862	0.0277873	-0.012667	-0.0297736	0
138	-0.010713	0.0463871	-0.00190717	0.0323528	-0.0424139	0.00307885	-0.0154162	0.0824842	-0.0190112	-0.0103672	0
138.2	0.0269256	0.00256697	0.0487754	0.0855146	-0.0113074	-0.00102744	0.134947	0.0284382	0.0268364	0.00377936	0
138.4	0.013463	-0.0374655	0.0732519	0.0213008	-0.0146578	-0.0037314	0.0394931	0.0250657	0.016018	0.0126737	0
138.6	-0.0162013	-0.0134742	0.0359116	0.00218464	0.025081	0.0236177	0.0103437	0.044136	0.0251109	-0.0092065	0
138.8	0.00592998	-0.00987902	-0.0103747	0.0278915	0.0213045	0.0422051	0.0834511	0.0287189	0.0430867	0.00056671	0
139	0.0346595	-0.0213742	-0.0158942	0.00970162	-0.0236297	0.0235197	0.00605699	-0.00695083	-0.000194523	0.0303338	0
139.2	0.0115649	0.00923916	0.0111169	0.0110984	0.0512932	0.0170219	-0.0255971	-0.0365348	-0.0375998	0.00265638	0
139.4	0.0270735	-0.0379485	0.0400045	-0.0214402	0.0152082	-0.0142633	0.0154412	0.00420333	-0.0428414	0.0527198	0
139.6	0.0326169	0.0547155	-0.0163528	0.0212115	-0.0205256	0.00215762	-0.0463711	-0.0240747	-0.0274725	0.0347667	0
139.8	0.0185376	0.0583764	-0.0548372	0.0211168	0.00129338	-0.00229593	-0.0278667	-0.0160772	-0.00582442	0.0164255	0
140	0.0193531	-0.00469122	-0.0194305	-0.0089904	0.00354966	-0.00399939	-0.0355025	-0.0313135	-0.0363112	0.0210053	0
140.2	0.00713941	-0.00381449	0.00665419	0.0213685	-0.0233878	-0.0131962	-0.0805598	-0.0552287	-0.028754	0.0156878	0
140.4	-0.0219233	0.0191205	-0.0102119	0.033991	-0.00543601	-0.0485662	-0.0180951	-0.0300365	0.0407934	-0.00339451	0
140.6	0.00486811	0.0310001	0.00861171	-0.0536533	0.0388937	-0.0236514	0.00424716	-0.0606406	-0.00437457	-0.0320282	0
140.8	0.00732101	0.00666284	0.00271411	-0.0351966	0.0190241	-0.0289627	-0.0269447	0.0196679	0.0135913	-0.0194058	0
141	-0.0113691	-0.0397918	-0.072549	-0.0192166	-0.0018763	-0.0184597	0.0150627	-0.00471436	-0.00262225	-0.00356274	0
141.2	-0.0312369	-0.0368142	-0.0554008	-0.0327086	-0.0323669	0.0140153	0.0809112	-0.024491	-0.0295738	-0.0160392	0
141.4	-0.0298746	0.000670874	0.0238457	-0.0396782	-0.0282699	0.0270226	0.0312881	0.0276759	0.0165491	-0.0162834	0
141.6	-0.0108766	-0.0198791	0.0499046	-0.0244917	0.00906551	0.0123716	-0.0514711	0.0386271	0.0395452	0.0103223	0
141.8	-0.00338708	-0.0718171	0.0485609	-0.010635	0.00643964	-0.00158001	0.0178124	-0.00333722	-0.0258676	0.0150546	0
142	0.00192967	-0.0232891	0.0319258	-0.0268456	0.00445166	0.00224874	0.0958954	0.0193459	0.00100588	-0.00893566	0
142.2	0.0311863	-0.0212353	0.0136302	0.0330289	-0.0100177	0.0358471	-0.0236165	0.0755435	-0.0279729	-0.0279011	0
142.4	-0.0168928	-0.0187823	0.0462846	0.0603906	0.00703975	0.0407259	-0.0278935	0.0415731	0.000898089	-0.0123427	0
142.6	-0.0173473	0.0148929	0.0139422	0.01624	0.00286164	0.00886852	0.0009128	-0.0117544	0.0357346	0.0212491	0
142.8	0.0159818	0.039637	-0.011453	-0.0394945	-0.0130928	-0.00824801	-0.00120727	-0.00760393	-0.0135621	0.00948449	0
143	0.00163079	0.0274613	0.0267753	-0.0304878	0.00281133	0.00171199	0.00659505	-0.016063	-0.0456455	-0.0190119	0
143.2	0.0190771	0.00578631	-0.0262551	0.0354209	0.00058561	7.50192e-05	-0.0468174	-0.0603023	0.0125373	0.0104251	0
143.4	-0.0116074	0.0216546	-0.0314338	0.0143773	-0.0132011	-0.00616637	-0.00137168	-0.00795201	-0.00353153	-0.00578805	0
143.6	-0.00922916	0.0217026	-0.0258384	-0.0186278	0.023687	-0.0260885	-0.0235184	-0.0130926	0.0222218	0.01624	0
143.8	0.0108	-0.0154321	-0.0278718	0.000447403	0.0235283	-0.0150511	-0.0323926	-0.0555144	0.016848	0.0314347	0
144	0.00310841	-0.0114585	-0.0297745	0.0162692	-0.000387071	0.00215722	0.0251246	-0.018317	0.0106366	0.0131441	0
144.2	-0.00335085	-0.00538783	-0.0298001	-0.00481923	-0.00533922	-0.000883157	0.022813	0.0370015	0.0229602	-0.0028906	0
144.4	0.0143978	-0.0234805	-0.030528	-0.0200553	-0.00232822	-0.00430427	-0.0569007	-0.00256872	0.000939199	-0.00448832	0
144.6	0.00862267	0.0536163	-0.0280205	-0.0177584	0.0176369	-0.00951519	-0.0291524	-0.0370128	-0.00308242	0.00164744	0
144.8	0.00891854	0.0314864	0.00234459	-0.0261499	0.00311793	-0.00877925	0.0381799	0.00392854	-0.00738756	0.0302278	0
145	0.0161969	0.0858863	0.0667903	-0.0368046	-0.0175362	-0.00999783	0.0183119	0.017859	0.0181476	-0.0156436	0
145.2	0.00290086	0.041947	0.0242242	0.0126132	0.00400107	0.00921266	-0.0308919	0.00657591	0.00464442	-0.0130162	0
145.4	-0.0267247	-0.0606452	-0.022144	0.0444841	-0.00100206	-0.000375671	-0.0222451	0.000901333	-0.0387305	0.00066789	0
145.6	-0.0225301	-0.0102495	0.00256074	-0.00493593	-0.0254966	-0.0264446	0.0279465	0.00450697	-0.015991	-0.0323406	0
145.8	0.00872334	0.0449471	-0.0023768	-0.0324625	0.00861906	-0.00525933	0.0378336	0.00695786	0.0306406	-0.0226242	0
146	-0.0220828	-0.0791109	0.0637345	0.0212124	-0.00193509	-0.0205474	-0.0260292	-0.012874	-0.0332767	-0.0305318	0
146.2	-0.0203025	0.0300927	0.0293875	0.0801098	0.0216468	0.00920008	-0.0543444	0.014422	-0.00611588	0.00119246	0
146.4	0.0235377	0.0545197	-0.0039869	0.0258452	-0.00283504	0.0160136	-0.00592272	0.00872973	-0.0262521	0.0191198	0
146.6	0.00801864	-0.00636134	-0.0235197	-0.00860891	-0.0355234	-0.00631939	0.0588332	0.0267661	-0.000895564	0.00566622	0
146.8	-0.0224934	-0.0477975	-0.0189844	0.027989	-0.018974	-0.00928924	0.0473716	0.0168478	0.0374781	-0.000533656	0
147	-0.00261453	-0.0992059	-0.00370835	0.0114548	0.00966153	-0.000739647	0.00177232	-0.0428164	0.00281246	-0.0137987	0
147.2	-0.0101683	-0.0957655	-0.0458721	-0.0440498	0.00909245	0.00411273	0.0319977	0.00574404	0.0357865	-0.0430619	0
147.4	0.00699958	-0.0838832	0.0158663	-0.00629632	-0.01928	0.0502163	0.0133226	0.0084525	0.00112819	0.021886	0
147.6	-0.00716097	-0.0126577	0.0226442	0.00174543	0.0296891	0.0374128	-0.0391115	0.0223083	0.0526595	0.00691433	0
147.8	-0.0122186	0.0155927	5.63951e-05	-0.0134375	0.0197138	0.0055083	-0.0366774	0.0276541	0.0190095	0.00763274	0
148	0.001628	-0.0097416	-0.0026894	-0.00583355	-0.0272086	-0.011299	-0.00332247	0.00613628	-0.0144696	0.0158984	0
148.2	0.00540764	0.0188617	-0.0166697	-0.00165873	-0.0244493	-0.0146802	0.0084735	-0.0168642	0.00690449	-0.000801344	0
148.4	0.00372143	0.110891	-0.0276567	-0.0172248	-0.000728395	0.00118939	-0.00587727	-0.0112469	-0.0384689	0.00797633	0
148.6	0.0109787	0.1127	0.0154894	-0.0219465	0.0258057	0.00747627	-0.0249687	0.0210841	-0.0347485	-0.00851993	0
148.8	0.0235947	-0.0257007	0.0196981	-0.0589734	-0.00288865	-0.0183984	0.0523314	-0.00529421	-0.0516368	-0.00483163	0
149	0.0372358	0.0369876	0.0342622	0.00124583	-0.0025052	-0.00619676	0.0518564	-0.0275123	-0.019964	-0.00271684	0
149.2	0.0108129	0.0497913	0.0112963	0.0381227	0.02379	0.0140601	0.00335713	0.0139015	-0.00984495	0.0302852	0
149.4	-0.0136124	-0.0298063	-0.0323125	0.0321054	0.0047794	-0.000916142	-0.029686	0.0310578	-0.0161273	0.0076589	0
149.6	0.00750641	0.00295843	-0.0340591	0.0259642	-0.0184595	-0.0139905	-0.0211477	-0.0132261	0.00853538	-0.0496117	0
149.8	0.0130733	0.0318295	-0.000342707	-0.0204496	0.018402	0.000959632	0.0247399	-0.0297087	0.00457437	0.00493596	0
150	-0.0161955	-0.0386768	0.0534861	0.0142221	-0.000993575	-0.00817348	-0.024804	-0.0458823	-0.0143176	0.013988	0
150.2	0.00100093	-0.0489973	-0.0144838	0.0362575	-0.0087891	0.0131724	-0.0263353	-0.0502922	0.0130758	0.0182057	0
150.4	-0.0202319	-0.0118511	-0.0218626	-0.00399449	-0.00706896	0.00700159	-0.00460945	-0.0215995	-0.00631552	-0.0152722	0
150.6	-0.0384854	0.0144104	0.0293983	0.00556456	-0.0168112	-0.0336428	-0.0349556	0.0286074	0.003172	-0.00782955	0
150.8	-0.0301188	-0.0169521	0.0645317	-0.00142731	-0.0331493	-0.0313723	-0.053894	0.0211229	0.0122622	0.00924559	0
151	-0.0325282	-0.0441821	0.0527849	-0.0443393	-0.0271975	0.00911855	0.0165586	-0.011531	-0.0147549	-0.0325553	0
151.2	-0.00507505	0.0278599	-0.0194233	0.0435416	0.00828201	0.00352296	0.0559838	0.0631217	0.0521826	-0.0201085	0
151.4	0.0130045	0.00412984	0.0446636	-0.0432484	0.00582822	0.0184983	-0.0615571	0.0787672	3.56915e-05	0.00144239	0
151.6	0.00372923	-0.0152193	0.0325641	-0.0361873	0.00971366	0.0190217	-0.0209945	0.0291536	0.0144231	0.00580936	0
151.8	0.00896976	-0.031964	0.00235392	0.00227437	-0.0175381	0.0348767	0.0722505	-0.0316453	0.011765	-0.0110596	0
152	-0.000711518	-0.00147918	-0.0518184	-0.0132872	-0.00184316	0.022217	0.0379122	-0.018923	-0.0132383	-0.00668052	0
152.2	-0.0036698	0.0251016	-0.0869693	-0.0012869	0.0529409	-0.0233138	-0.0656352	0.0254792	-0.0269328	0.00958369	0
152.4	0.037505	-0.0308309	-0.0270758	0.0287722	0.0319563	-0.0270041	-0.0648631	-0.00046307	-0.0601778	-0.0113938	0
152.6	0.0134369	0.000765104	-0.0615018	-0.0186868	0.00995004	-0.0201202	0.0508452	-0.0195666	-0.0168983	-0.01592	0
152.8	0.00152412	0.0176018	-0.027031	0.012788	0.0107409	-0.00677152	-0.00177654	-0.0175066	0.0207542	0.032739	0
153	-0.000259968	0.01877	-0.00755788	0.0356442	0.0236542	-0.00761473	0.0354876	-0.0588566	0.0228369	0.0253672	0
153.2	0.0100831	0.0103004	-0.0467953	-0.0276067	-0.007679	-0.0229041	0.0239258	-0.0260344	0.0225232	0.0161476	0
153.4	0.0316554	-0.0132524	-0.0222903	-0.0373586	-0.0369785	-0.00952089	-0.0264349	0.00450599	0.020055	0.0244578	0
153.6	0.0196529	-0.00486353	0.0520605	0.0155837	0.00248594	0.019735	0.0210531	-0.0432896	0.0117241	8.58533e-05	0
153.8	-0.0229143	0.0386367	0.0216862	-0.0216483	0.0296739	0.00333698	0.0202623	-0.00895026	0.0115422	-0.0128316	0
154	0.00306548	-0.0140993	0.00726101	0.0224706	-0.0234717	-0.0124925	0.0140146	0.0256006	-0.00347073	0.0173296	0
154.2	-0.0101884	-0.0356699	0.030409	0.0223271	0.012807	-0.0273545	-0.00629523	0.0164368	0.0454117	-0.00481297	0
154.4	-0.0225827	0.0437709	0.0504142	0.0189914	0.0134913	0.0277709	-0.0234834	0.0110291	0.017654	-0.0126673	0
154.6	-0.013207	0.0645576	0.00983484	0.0180083	-0.0110914	0.0519914	-0.0281424	0.0174812	-0.0336795	-0.00351055	0
154.8	-0.0219303	-0.0296471	-0.00506455	0.01488	-0.0185854	0.00530124	-0.0190916	0.00802202	-0.049836	-0.00961273	0
155	-0.0239513	-0.0728419	0.0221808	0.0233759	-0.0309399	-0.0185823	-0.00818211	-0.00130943	-0.0555564	-0.0025981	0
155.2	0.0195025	0.00425734	-0.0590056	0.00407549	0.00445054	-0.0196561	-0.00612938	0.0116293	0.00259164	0.0102934	0
155.4	-0.00655839	0.0471221	-0.0217073	0.010622	0.00231347	-0.00135455	0.0252269	-0.019021	-0.0018557	-0.0352809	0
155.6	0.00594229	0.00839885	0.0122837	0.0176283	-0.0317844	-0.0180171	-0.0279841	-0.0130613	-0.0281323	-0.0217883	0
155.8	0.0237551	-0.043424	-0.000605297	0.0027594	-0.00546122	-0.0227853	-0.0520621	-0.000952983	-0.0338771	0.0071744	0
156	-0.0047443	-0.0533884	-0.02469	-0.0331066	0.0194912	0.00190602	-0.00603829	0.0134495	-0.00607988	0.0210303	0
156.2	-0.0138066	-0.0298128	-0.0195981	-0.0377997	0.00876462	-0.001393	0.0294643	0.0352452	0.0261225	0.0275691	0
156.4	0.0307369	-0.0152485	0.0103113	0.00114926	0.0211038	-0.0159731	0.0367547	0.0469829	0.0412456	0.0011923	0
156.6	0.0196109	-0.0266181	-0.00277444	-0.00286366	-0.0202022	0.0412193	0.0376002	0.0818724	0.0664413	-0.0267147	0
156.8	-0.0319889	0.0104333	0.0326266	0.0480447	-0.0215334	0.0116592	0.0470954	0.0294569	-0.00371048	-0.0220915	0
157	-0.0136595	0.0989525	0.0576032	-0.000596605	0.00937978	-0.005282	0.0277392	0.0345775	-0.0489704	0.0100399	0
157.2	0.0154072	0.0827893	0.0159977	-0.054253	0.0416381	-0.00269861	0.00112938	-0.0215934	0.00322305	0.0352642	0
157.4	0.011763	-0.000378691	-0.0531291	-0.0210127	0.0501272	0.00436209	-0.000632402	-0.0759746	0.0306521	0.0192228	0
157.6	0.0211699	0.0190856	-0.0147385	0.0262051	0.0182171	0.0449227	0.00468452	-0.0164276	-0.0140138	-0.00674628	0
157.8	0.0195068	0.055901	0.107593	0.0436916	-0.0283472	0.0614919	0.00274091	-0.0271	0.00463929	0.00758153	0
158	-0.0385313	-0.0607878	-0.00634064	0.0120082	-0.0379978	-0.00202145	0.0200342	-0.0180418	0.0455796	0.00284566	0
158.2	-0.0193984	-0.0342361	0.00534106	-0.00769339	-0.0208753	0.00662676	0.000592306	-0.00237195	0.0194781	0.0185558	0
158.4	0.00966301	0.0283067	-0.019876	-0.0288715	-0.00447211	-0.0044099	0.0250553	-0.0286785	-0.00631012	0.0157008	0
158.6	-0.00173343	0.000296606	-0.0660361	-0.0451192	-0.0039325	-0.00840656	-0.0268881	-0.0393068	-1.45393e-05	-0.00658642	0
158.8	-0.00878075	-0.0441206	-0.00934805	-0.0430473	-0.0228877	-0.00192147	-0.092834	-0.0315991	-0.00636398	-0.0199007	0
159	0.00497421	-0.0551427	0.0274301	-0.0214852	-0.0221794	-0.0358916	-0.0156679	-0.0338035	-0.0186564	-0.0116775	0
159.2	0.00576311	-0.0799693	-0.018551	0.0115441	0.0240012	-0.00275365	-0.00985727	0.0136489	0.0153674	0.017668	0
159.4	0.00643452	-0.0442053	-0.0185737	-0.0223672	-0.0115221	-0.000569563	0.00446327	-0.00245506	0.0238575	0.000442545	0
159.6	0.00391849	0.0219778	0.0105173	0.0424877	0.00475283	0.0119669	-0.00737749	0.0410893	-0.0105216	0.000556757	0
159.8	-0.00191127	0.0244272	0.0191778	0.0647704	0.0149955	0.0155147	0.0088847	0.0196782	-0.0304782	0.0153832	0
160	0.000756213	0.0161184	-0.00730085	0.00239622	0.00314068	0.00620228	0.0252973	0.0093047	-0.00416067	0.00305285	0
160.2	0.00178618	0.014321	-0.0372525	-0.0239781	0.00141853	0.00452156	0.0544623	0.0460073	0.0386535	0.00908687	0
160.4	-0.0244351	-0.0217927	-0.0214174	-0.013229	-0.0168114	-0.00906334	0.119261	-0.0174623	0.0390971	0.0521402	0
160.6	-0.0507444	0.0320653	0.0133137	-0.00685767	0.00727033	-0.0261881	0.0119813	0.0202589	-0.0160349	0.000826347	0
160.8	-0.0229632	-0.0364242	-0.0429311	-0.0193543	-0.000686163	0.002497	-0.0155408	-0.0067792	-0.00556526	-0.0205404	0
161	-0.0169915	-0.0228093	-0.00905457	-0.0450457	-0.0143063	0.0172699	-0.0425298	-0.0410238	-0.0100439	-0.0282547	0
161.2	0.00818893	-0.000978721	0.045721	-0.0362757	-0.0193975	0.031054	-0.0362809	-0.0380541	-0.0147282	-0.0201801	0
161.4	0.0265113	-0.00823579	0.024553	0.000405998	0.00119821	0.0466697	0.00843529	-0.00350485	0.0151169	0.0199097	0
161.6	-0.00783741	0.0327728	0.00926803	0.0062377	0.0324485	0.0372677	-0.00811622	0.0142205	0.029049	0.032709	0
161.8	0.00776218	0.0208527	0.0307307	0.00545252	0.00307778	0.0246221	-0.0198827	-0.0343876	0.00836458	-0.011809	0
162	0.031643	0.0471021	0.0285636	0.0794789	-0.0352215	-0.0018645	0.0617796	-0.0079451	-0.000423396	0.00218399	0
162.2	0.0120297	0.0577147	-0.00159551	0.0658879	-0.0140083	0.000643286	0.0120045	0.0277749	0.00152702	0.00446742	0
162.4	-0.000839969	-0.0108008	-0.0569298	-0.00340942	-0.00519148	0.00648189	-0.0202676	0.0256191	-0.013706	-0.0474948	0
162.6	-0.0189997	-0.073913	-0.035784	-0.00798149	0.000384239	0.0041163	-0.0267199	-0.0302767	-0.0322771	-0.0185133	0
162.8	-0.0169336	-0.0323564	0.0317937	0.00926278	0.0295806	-0.0216187	-0.036964	-0.0689426	-0.0251493	0.0122824	0
163	0.0286373	0.0189737	0.0161494	-0.0337998	0.0292531	-0.0520161	0.00696463	-0.0261032	-0.0278437	-0.0720866	0
163.2	-0.00703929	-0.0459874	-0.00945665	-0.0426207	-0.00121581	-0.00371124	-0.0151498	-0.0113194	-0.0598943	-0.0172212	0
163.4	-0.0305263	0.0104058	-0.0327888	-0.0228316	-0.00803222	0.0160941	-0.0133855	-0.0469913	0.0389824	-0.0155754	0
163.6	0.0061343	0.0536322	-0.00117364	0.000536277	-0.0259572	0.00745877	0.0187359	0.0201186	0.0439788	0.0144761	0
163.8	-0.0244214	0.00768233	-0.00924671	0.0341109	0.004283	-0.036025	0.00585797	0.0748585	0.0269229	0.00624582	0
164	-0.0478215	0.00281912	-0.0258897	-0.00618169	0.00746063	-0.0215539	-0.00809263	0.0496836	0.0415279	-0.0116087	0
164.2	0.00748116	0.0235491	0.00925576	-0.0382183	-0.0369158	0.0416854	0.0229693	0.0123927	0.0399702	0.0250021	0
164.4	-0.00122051	-0.0520065	0.0147994	0.0526333	0.00333358	0.0276563	0.0240632	-0.00487705	0.044908	0.0126544	0
164.6	-0.0154039	-0.0290749	0.0166659	-0.0578169	0.00428005	0.0613872	0.00186764	0.0301365	-0.0124429	-0.0117358	0
164.8	-0.00724378	0.00106072	0.00807522	-0.0551785	-0.00411504	0.0229714	0.000938815	-0.0194339	-0.0147513	0.0527599	0
165	0.0234857	0.0393427	0.0488844	0.0766059	0.0221685	0.00605916	0.00373476	-0.05677	-0.0220316	0.0249369	0
165.2	0.0386112	0.0106527	0.00778838	0.0645733	0.0495934	-0.010992	0.00286389	-0.0204692	-0.0215455	0.000983522	0
165.4	0.0268138	-0.0466423	-0.0250211	-0.0553389	0.0293489	-0.0250772	-0.00491543	0.000170493	-0.0347212	0.0361579	0
165.6	0.0145454	-0.0141364	0.039767	-0.0376114	0.0025075	0.00542897	-0.0229665	-0.0165567	-0.0622966	0.00756601	0
165.8	0.0205141	0.0323498	-0.0286329	0.0388029	0.0350428	-0.0127206	-0.0209803	0.0117502	0.0128025	-0.0280379	0
166	0.0541445	0.0308079	0.0317572	0.00345795	0.027992	-0.0190873	0.0184265	-0.0115094	0.0319567	-0.0175229	0
166.2	0.0269926	0.00945355	0.039105	0.000153776	-0.0195092	0.00233039	0.0251975	0.0191104	0.00331447	-0.0020461	0
166.4	-0.0032052	-0.00825287	-0.0115677	0.0459975	-0.0165081	-0.00236463	-0.00314029	0.0324288	-0.00844892	-0.00484337	0
166.6	0.00125394	0.0134007	-0.0459299	0.0518293	-0.00845219	-0.0364786	-0.00298538	0.0464444	-0.00313206	-0.0154708	0
166.8	0.0154615	0.028409	-0.0107136	0.00495532	-0.0117271	-0.0379379	0.0161773	0.0507187	0.00732756	-0.0256978	0
167	0.011959	0.0195238	0.0721467	-0.0320647	0.0149562	-0.00484838	-0.0233777	-0.0130135	0.0162452	-0.00956957	0
167.2	-0.0190259	0.0818685	0.0435017	-0.0415795	-0.0267512	-0.0186777	-0.0701164	0.000227007	-0.0210348	0.0491492	0
167.4	0.024546	-0.038921	-0.0173936	-0.0409216	-0.0176626	-0.0291576	0.0270969	-0.0250857	-0.0558516	0.0130794	0
167.6	0.0164652	0.0196112	-0.0356047	-0.0115092	0.018042	-0.0567212	0.0249855	0.00299085	-0.00418319	0.000976493	0
167.8	-0.00189444	0.107115	-0.015695	0.013031	0.00112652	-0.0450436	-0.00740985	0.00753232	0.0279849	0.00858341	0
168	0.00546427	0.0362287	-0.0100064	0.026092	-0.0401301	-0.0105089	-0.014512	-0.0201774	-0.0146265	0.0112956	0
168.2	-0.003495	-0.0286159	-0.0141722	0.0327371	-0.0465383	-0.0189365	-0.037479	-0.0207391	-0.0433495	-0.000107239	0
168.4	-0.00155675	-0.00637458	0.00147554	0.00546084	-0.0202408	-0.0263155	-0.00324162	-0.0327061	-0.00599307	-0.0555237	0
168.6	0.0119605	-0.00768972	-0.0321564	-0.014976	0.0347643	0.00874951	0.0126831	0.0139543	0.0483382	-0.0339996	0
168.8	-0.00359945	-0.0477827	-0.0119179	0.0112408	-0.0101891	0.0235534	0.0364908	0.0296208	0.0323225	0.0286848	0
169	0.0169555	-0.0410669	-0.0108376	0.0686474	-0.0195261	0.00880177	0.0217009	0.0119662	-0.00350142	0.017995	0
169.2	0.00424141	-0.0220843	0.00594584	0.0329954	0.0426846	-0.00789291	-0.0086584	0.00792788	-0.00970101	-0.0317262	0
169.4	-0.0405887	-0.0221394	0.0390186	-0.0264386	0.0576208	-0.016889	-0.000831191	0.00458031	0.00246789	-0.0259438	0
169.6	-0.0387823	0.0103353	0.00912251	0.00800122	-0.00342699	0.00306155	-0.00550815	0.0119283	0.0185547	0.0168895	0
169.8	-0.0526365	0.0429951	-0.0218605	-0.00276409	-0.0306819	0.0525613	-0.038621	0.0648657	0.0316148	0.0141758	0
170	-0.0213222	-0.0222793	-0.0314736	0.0124313	0.00188979	0.00483544	0.0854117	-0.0026807	-0.00414869	-0.00898066	0
170.2	-0.0239463	-0.0683172	-0.00553142	-0.0110668	-0.00839978	0.0143173	0.00491595	-0.00207673	-0.0505501	0.000980925	0
170.4	-0.0252601	-0.0398541	0.0253824	-0.0114669	-0.0103233	-0.0156138	-0.0167081	0.0325273	-0.0284426	-0.00673422	0
170.6	-0.00300521	-0.0310326	0.0503815	-0.00529572	0.0167497	-0.0431507	-0.00369419	0.018476	-0.00963068	-0.0179134	0
170.8	0.000380542	-0.0275009	0.0533094	-0.0314062	0.0042093	0.0180035	-0.0480782	-0.0129726	-0.0120309	-0.0061971	0
171	-0.00882934	0.0128493	-0.00373018	-0.0156135	-0.0323241	0.0324922	0.0243245	-0.0091675	0.0363188	-0.00412277	0
171.2	0.00391422	-0.0706032	-0.0719675	0.0343346	-0.00205771	-0.0188622	-0.0412686	0.03814	0.0215893	0.0177617	0
171.4	-0.0323571	-0.00963325	-0.0338004	0.014561	-0.0044714	0.0178556	0.0042315	0.0298517	0.0200209	0.0342901	0
171.6	-0.0311925	0.0107993	-0.0231636	-0.0289187	-0.00139775	0.0078178	0.00176197	0.00986756	0.0209058	0.021297	0
171.8	-0.0133607	-0.0314121	0.00987189	-0.0937904	-0.0182079	-0.0204012	0.017351	-0.00901463	0.0161901	-0.0144263	0
172	-0.0187589	0.0100275	0.0233569	-0.0642602	-0.0245158	0.00422747	0.0283061	-0.0124081	-0.0126859	-0.0176804	0
172.2	-0.000954121	0.0788293	-0.0364014	0.063003	0.00224121	0.051254	-0.018191	-0.0250484	-0.0141812	0.0235054	0
172.4	0.0421432	0.0323796	-0.0112264	0.0428383	-0.0175816	0.0770632	0.0508699	-0.0656275	0.0676142	0.0294015	0
172.6	0.0235361	0.0251943	0.00177492	-0.00986184	0.00126963	0.0212907	0.0522585	0.0269206	0.0268062	-0.0120121	0
172.8	0.0162754	0.0537695	-0.00961157	0.0185159	0.00743005	0.0244304	0.0486092	-0.0485946	-0.0019702	-0.0107373	0
173	0.0350519	0.0111793	0.00786244	-0.00478877	0.0167961	0.00963975	-0.0273031	-0.0724648	0.0147966	-0.00726535	0
173.2	0.0232459	-0.0119308	0.0425412	-0.0382195	0.0223602	-0.0281077	-0.0340527	-0.0359677	-0.0225174	0.0114838	0
173.4	0.0128343	0.028121	0.0191341	0.00755481	0.0185603	-0.0227952	0.000655235	-0.0324106	-0.0686818	0.0209401	0
173.6	0.0283437	0.007045	-0.0356622	0.030009	0.018569	-0.00821486	-0.0631824	0.000168914	-0.0299303	-0.0273389	0
173.8	-0.0145878	-0.0434143	0.0103812	-0.0183251	0.00112688	-0.0294367	-0.0208257	-0.013553	-0.0156511	-0.0297907	0
174	0.0263984	0.0154843	0.0568996	0.0500771	0.0155088	-0.0284931	-0.0631483	-0.00551103	-0.0111487	0.00239946	0
174.2	0.0136095	-0.0189109	0.0356768	0.0786432	0.0440709	-0.0214775	0.0144273	0.00855827	-0.0058984	0.0134609	0
174.4	-0.00364764	-0.0161687	-0.0159665	0.0156282	0.0218558	-0.0329134	-0.00209228	0.0113475	-0.00573559	-0.00606057	0
174.6	0.0106072	0.0438917	-0.0550029	-0.0381031	-0.0131708	-0.0350893	-0.0563827	0.0199779	-0.00447463	-0.00781813	0
174.8	0.0139977	0.0117886	-0.0594341	-0.034624	-0.0238623	-0.00409408	-0.00219604	0.010296	0.00294524	0.0266372	0
175	0.0117951	-0.0386157	-0.0264441	-0.0248724	-0.0323988	0.0168005	-0.0169056	-0.0034774	0.00478243	0.0334063	0
175.2	-0.0133922	0.0152315	0.00154804	-0.0292176	0.0164771	-0.0158466	0.00837854	0.0705513	0.00132573	-0.0196533	0
175.4	0.0102115	-0.00258331	0.0346763	-0.0115114	0.0188891	-0.0275273	0.00583566	-0.050307	0.0101103	-0.0118599	0
175.6	0.00370418	0.00755342	0.0337666	-0.0151035	-0.0189163	-0.00495234	-0.0112947	-0.0228836	-0.0308259	-0.0171777	0
175.8	-0.00761513	-0.0145764	0.0379727	0.0303917	-0.0226593	0.00303269	-0.00934606	0.0513803	-0.0255243	-0.00932916	0
176	-0.00550076	-0.0410357	0.0385908	0.0410042	0.000474876	0.0038256	-0.00688712	-0.00879468	0.0190986	0.0228951	0
176.2	-0.0216883	0.0182294	-0.0014971	-0.0177329	0.00748083	0.0261094	-0.00826736	-0.0488934	0.00982145	0.00571023	0
176.4	-0.0169904	0.0171954	-0.0266009	0.0459219	0.0158189	0.0311035	0.0271969	0.00307887	0.0213382	-0.0225775	0
176.6	-0.00984253	-0.0113368	-0.0420151	0.000615815	0.00804035	0.0152866	0.0478909	0.0771723	0.0356367	0.0276442	0
176.8	-0.0317253	-0.0103077	-0.0162897	0.00650327	-0.017077	0.0160478	-0.0518646	0.0332842	-0.0232388	0.0218643	0
177	-0.0214311	0.0482525	0.0124213	-0.0370325	-0.0431568	0.0200291	0.0171116	-0.00238997	-0.00148412	-0.0269316	0
177.2	-0.00128604	0.0245086	0.0284284	-0.0516716	-0.0201986	0.0411903	0.135445	0.0173652	0.0536918	-0.0248821	0
177.4	0.00452567	-0.0330262	-0.00416298	-0.00830622	0.00955642	0.06282	0.0888655	0.0285798	0.0547336	0.0104179	0
177.6	0.000487239	0.0205009	-0.0607652	-0.0278365	-0.028132	0.0464577	0.0359789	0.0191646	0.0586096	0.00771499	0
177.8	-0.0579292	-0.0174911	-0.00340834	0.0283027	-0.0453241	0.0325713	0.0345606	-0.0186247	0.0187454	-0.00713513	0
178	-0.0153053	-0.0526324	-0.029004	-0.00505069	-0.0108439	-0.00851766	-0.0215134	-0.079242	-0.0225421	-0.0289318	0
178.2	-0.00838313	-0.0644459	-0.0709938	-0.048417	0.0310984	-0.0270999	-0.12829	-0.0765608	-0.0128147	-0.00532487	0
178.4	-0.0142305	-0.0365226	0.036473	-0.00997784	0.0135405	-0.0226129	-0.0719092	-0.0295071	-0.00918577	0.0255899	0
178.6	0.0102553	0.00325374	0.0898583	0.0427606	0.0192435	-0.0118132	0.0356205	-0.0215283	-0.0359518	0.0111349	0
178.8	0.0348346	0.0551792	-0.00574655	0.0392301	0.0479526	-0.0100517	-0.00168359	-0.0141733	-0.0325786	-0.00373215	0
179	0.0524299	0.106682	0.0220758	0.0194206	-0.0128747	-0.0361025	-0.0278002	0.0536032	-0.00653377	0.00611932	0
179.2	0.0238675	-0.00108726	0.0381559	-0.00494047	0.0143355	-0.0441292	0.0106006	0.0373953	-0.052765	-0.0482987	0
179.4	0.0147915	-0.00896798	0.0289404	-0.0235648	0.008772	0.00913084	-0.00172875	0.0486586	-0.029284	0.0292523	0
179.6	0.0125015	-0.0586285	-0.00629546	-0.009065	0.0209479	0.0180103	-0.0222289	0.00854192	0.0141326	0.0388985	0
179.8	-0.00106834	-0.074173	-0.00363868	-0.00345409	0.014197	0.0187661	-0.0325254	-0.0242109	0.0185444	-0.0305669	0
180	-0.0139456	0.00277778	0.0199729	-0.0106702	-0.0137845	0.0329067	-0.00169992	8.35926e-06	-0.000187696	-0.0373582	0
180.2	-0.0360006	0.0160324	-0.0154703	0.0199316	0.00118538	-0.0127924	0.0462648	-0.0104178	-0.000202958	-0.000495222	0
180.4	-0.0586483	-0.0168228	-0.0402919	0.0447489	-0.00219824	-0.0623179	-0.00929994	-0.0476177	0.0278508	0.0119971	0
180.6	0.0186715	-0.0100084	0.0296508	-0.0179772	-0.0135083	-0.0150549	-0.0194844	-0.0232812	0.00123313	0.0330036	0
180.8	0.0218214	0.0170958	-0.00785281	-0.016315	-0.0226109	-0.0150261	-0.0271404	-0.0417707	0.000122404	-0.019811	0
181	0.000424072	-0.00544163	0.0246235	-0.00785152	-0.0111161	-0.0168259	-0.0224555	-0.0262763	-0.0164092	0.0156814	0
181.2	0.0215283	0.000515654	0.0140541	0.0136528	0.0109242	-0.0219071	0.0376647	-0.0189401	0.00203538	0.0216841	0
181.4	0.0382073	0.0634797	-0.0673151	0.0247687	0.0190409	-0.0295426	0.05381	-0.0096021	0.0270957	-0.0443424	0
181.6	0.0250417	0.0699156	0.0108532	-0.0344055	-0.00770432	0.00155843	-0.0127702	0.0656503	-0.0403008	0.0132779	0
181.8	0.00828411	0.0411128	-0.0170579	0.00521339	-0.0501954	-0.0359338	0.0308556	-0.00459494	-0.0317727	0.0146287	0
182	-0.0154219	0.0246592	-0.0427814	-0.0128373	0.0317889	-0.011979	-0.0455885	0.0034477	-0.0388237	0.020307	0
182.2	0.0143034	-0.0249504	0.00100173	0.0403884	0.0304155	0.00320988	-0.0550196	-0.0131904	-0.0503383	0.00226255	0
182.4	0.014494	-0.0238783	0.0512813	0.0247131	0.0115864	0.0200818	-0.014559	0.0100844	-0.00326289	0.00340507	0
182.6	-0.0211056	0.00985106	-0.0234254	-0.0314211	0.0321003	0.0151244	-0.0155774	0.0281403	0.0249945	0.00244555	0
182.8	-0.0134321	-0.0225849	-0.0915163	0.00593369	0.00516595	-0.0118967	-0.0165782	-0.00337814	0.00371511	-0.0200742	0
183	-0.00229044	-0.0487784	0.0401118	0.000397961	-0.0222746	0.0390398	0.00854675	0.0544244	0.0309405	0.00712727	0
183.2	-0.0289674	-0.000992911	-0.0188366	0.00364791	0.00193064	0.0536557	0.037938	0.00163168	-0.000372262	-0.00473765	0
183.4	-0.0264084	-0.0496754	-0.00721318	-0.0323226	-0.00564712	0.0243649	-0.0112891	0.0250906	-0.00364453	0.000156658	0
183.6	0.011031	-0.0366896	0.0310285	-0.0631852	0.014726	0.027882	0.00121426	0.037399	0.0272718	0.0329038	0
183.8	-0.000620169	-0.00533111	0.00308103	-0.0234494	0.0139523	0.0201262	0.0309431	0.00891905	0.0379413	-0.0100625	0
184	-0.0271978	-0.0225778	0.00521673	0.0243674	-0.000515465	0.00535512	-0.0221426	-0.0170493	0.026458	-0.059172	0
184.2	0.0143015	0.00746248	0.0341174	0.0127629	0.0219253	0.0205669	-0.063319	-0.0527416	0.00940449	0.000813003	0
184.4	0.0308364	0.0323857	-0.0393137	0.0185304	-0.018224	-0.0135369	-0.0113903	-0.053968	-0.0115059	0.0129248	0
184.6	0.0014369	0.00951699	0.0413018	0.0193622	0.0132136	0.0251024	-0.00341679	0.0110061	0.0411571	-0.00704669	0
184.8	-0.00261033	0.0276178	0.0677494	0.00649445	-0.0103152	0.0455685	-0.0779413	0.0639628	-0.00342252	0.00946879	0
185	0.0231179	0.0135475	0.029702	-0.0171503	0.000365249	0.0111616	-0.0931329	0.0262461	-0.0328661	0.0301578	0
185.2	0.0248862	0.00744592	-0.00791656	-0.0321863	0.0493897	-0.0130155	-0.0717613	-0.0427479	-0.0239784	0.00939567	0
185.4	0.0117707	0.0487823	-0.0391237	-0.0403698	0.0358766	-0.00294221	-0.062046	-0.0526169	-0.0467167	-0.0296271	0
185.6	0.0179821	0.0603557	-0.0569556	-0.0292259	0.00457172	-0.000421809	0.0142855	-0.0126297	-0.0236484	-0.0280295	0
185.8	-0.00742787	0.0961325	-0.0636323	0.0543654	0.022493	0.00555381	0.0566014	0.0474966	0.0383617	0.0246485	0
186	0.0236044	0.0146921	0.080924	0.0628693	0.0414624	0.0471877	-0.0209814	0.11789	0.0208049	0.0498555	1
186.2	0.0966175	0.0489472	0.0689565	0.0864834	-0.0061808	0.0684128	0.0179933	0.141295	0.0539055	0.0331652	1
186.4	0.125455	0.100825	0.101691	0.143673	-0.0106787	0.104758	0.0843973	0.117818	0.108277	0.0129294	1
186.6	0.12747	0.0818803	0.214246	0.149475	0.0115533	0.114223	0.106824	0.12404	0.111112	0.022211	1
186.8	0.138223	0.131238	0.178024	0.0995821	-0.0217677	0.067728	0.11669	0.125906	0.0757136	0.0207584	1
187	0.11427	0.207113	0.11265	0.0667658	-0.0260155	0.0741722	0.0154452	0.0358405	0.0275744	-0.00969798	1
187.2	0.120537	0.154295	-0.0116141	0.0537153	-0.0485241	0.0347865	-0.0224896	0.0476737	0.0436244	0.0588142	1
187.4	0.10105	0.120075	0.0280775	0.0933568	-0.0348947	-0.0100929	0.0238334	0.0274417	-0.020729	-0.00364961	1
187.6	0.0795695	0.11792	0.0735808	0.0423257	0.00515202	-0.0228516	0.0203853	-0.032236	-0.00633939	-0.00409704	1
187.8	0.0625733	0.113515	0.0807426	0.00149375	0.00576475	-0.0279511	-0.0262226	-0.0129127	0.0276511	0.0235781	1
188	0.0401461	0.0840353	0.0931943	0.0359847	-0.0323669	-0.0393817	-0.0469396	0.0506133	0.0095749	-0.0414171	1
188.2	0.0245223	0.0541069	0.058291	0.0511079	-0.0445684	-0.0319154	-0.0484001	0.0242318	0.0305789	-0.0723681	1
188.4	0.0103612	0.077851	0.0308934	0.108414	-0.0291375	-0.0114013	-0.0404531	-0.0296955	0.010563	-0.0599714	1
188.6	0.0114211	-0.0112744	0.0290071	0.0449625	-0.0438946	-0.0307067	-0.0478968	0.00263012	0.0311995	-0.108105	1
188.8	-0.0187679	-0.0023761	0.0150948	0.0428227	-0.0594756	-0.0554403	-0.00968027	0.0098026	0.0268492	-0.0541411	1
189	-0.024383	0.00794181	0.0265184	0.0162285	-0.0587343	-0.0972175	-0.0342745	0.00335365	-0.0283178	-0.024139	0
189.2	0.0225307	0.0219723	0.0119527	0.015043	-0.0575066	-0.0902385	-0.023047	0.0262662	-0.0289259	-0.0714795	0
189.4	0.056064	0.0541981	-0.0212442	0.0780087	-0.0717511	-0.0405686	0.0570204	0.0475077	0.0153183	-0.0781352	0
189.6	0.039941	-0.0115142	0.0355119	0.0194746	-0.0814052	-0.0582032	0.0154223	0.0422922	0.00212543	-0.05547	0
189.8	0.0225615	0.0676781	0.0505673	-0.00107404	-0.0494852	-0.0324486	0.0441126	0.0305147	0.051223	-0.0589814	0
190	0.0106769	0.0866994	0.0244315	0.0149866	-0.0557248	-0.00411847	0.0666106	0.0402096	0.0208531	-0.0229197	0
190.2	0.0587513	0.0743575	-0.0141777	0.0417713	-0.0824868	0.00868992	0.0237053	0.0358549	0.0273394	-0.0419817	0
190.4	0.0269854	0.0589714	-0.0077155	0.0478151	-0.0567428	-0.0047453	0.00931037	0.0410364	0.0507727	-0.064919	0
190.6	-0.03067	0.0405126	0.00442729	0.0450784	-0.0280108	-0.00244595	0.0761099	0.053878	0.0263407	-0.0207638	0
190.8	0.0101663	0.0384146	-0.0194437	0.0374695	-0.0423518	0.0269997	0.119935	0.0443362	0.01349	0.0134402	0
191	-0.00932362	0.0383886	-0.0113747	0.00562952	-0.0165953	0.00171579	0.0630007	0.0424406	0.0208681	-0.0168069	0
191.2	0.0212899	0.0711628	-0.0301312	0.0520723	-0.027425	-0.0233788	0.0281577	0.0436677	-0.0194483	-0.017815	0
191.4	-0.0124792	0.0384196	0.0551477	0.0378637	-0.0364391	-0.0197934	0.0196027	0.0976442	-0.00939746	0.0367963	0
191.6	-0.0264692	0.040525	0.041297	0.012872	-0.0147978	0.0059792	0.0505492	0.0906812	-0.0136038	-0.0101396	0
191.8	-0.00654035	0.0328134	-0.0123277	-0.00570678	-0.0109906	0.0307926	0.0650582	0.0401643	0.0126482	-0.0196972	0
192	-0.00660843	-0.0450925	-0.000481844	-0.021397	-0.0168815	0.0328556	0.0487468	0.0137504	0.0492023	0.017344	0
192.2	-0.0037478	-0.0572942	-0.0115517	0.0200619	-0.00875865	0.0162005	0.0421218	-0.0125492	0.0142551	-0.0474115	0
192.4	0.00113791	0.0261799	0.0591712	0.0486301	-0.0600382	0.0125889	-0.00341452	0.00896133	0.0711014	0.0382713	0
192.6	0.0387303	0.0440532	0.05672	-0.00720455	-0.0269412	0.0237961	0.00301222	0.0663653	0.0374156	-0.00940244	0
192.8	0.00767528	0.0343951	-0.00158035	-0.0247975	0.00349477	-0.00136384	-0.00614386	0.0102264	0.0358853	-0.00127831	0
193	0.0327962	-0.00630822	-0.0285768	-0.00265253	0.0118111	-0.0146363	0.0187359	-0.00505023	0.0329998	0.00565215	0
193.2	0.0654033	-0.0232944	0.00491546	0.0226589	0.0178929	0.00978707	0.0288698	-0.00378649	0.0259989	-0.0232993	0
193.4	0.021958	0.0143979	0.0465729	0.0333815	0.0198291	0.0214704	-0.010955	-0.0401221	0.0269537	0.00352602	0
193.6	0.0436604	0.0200237	0.0386678	0.0260166	0.0159536	0.00859161	0.00391536	0.0343675	-0.0303704	0.0210581	0
193.8	0.0132656	0.047201	0.0156339	0.0734643	-0.0299816	0.0109011	-0.0255099	-0.0077058	0.0106585	0.0124571	0
194	-0.0231191	0.0514526	-0.00943762	-0.0124503	-0.0125644	-0.0138634	0.0560101	0.00600905	-0.0113638	0.00732287	0
194.2	-0.0181875	-0.00340388	-0.0531216	-0.0572143	-0.0143827	-0.00848196	0.0237039	0.00553081	-0.0325458	-0.029285	0
194.4	-0.011204	-0.0316949	-0.0350233	-0.0538109	-0.0199201	-0.00772677	-0.0226511	0.0117722	0.0114813	-0.0354716	0
194.6	-0.0237139	-0.0188738	-0.00276665	-0.0415513	0.00829526	-0.0394664	-0.0133209	-0.00300671	0.0139261	-0.00786887	0
194.8	-0.0369786	-0.0345141	-0.0411697	-0.00382699	0.00223999	-0.0445519	-0.0619244	-0.0566289	-0.0518394	-0.00496178	0
195	-0.0540794	-0.0444465	-0.0306694	-0.0473713	-0.0290009	-0.0315807	-0.0308932	0.0292803	-0.0383568	0.0202858	0
195.2	-0.0393309	-0.0304161	-0.0274234	-0.0260916	0.029473	-0.0552598	-0.0189316	0.0149464	-0.0376655	0.0172148	0
195.4	-0.0129691	-0.000758118	0.042013	0.017372	0.0191819	-0.0118977	-0.0156247	-0.0128716	-0.0132606	0.00836411	0
195.6	0.0003984	0.00516601	0.0312984	0.0199995	-0.0130499	0.0269438	-0.0200327	-0.0186816	-0.00866914	0.000481438	0
195.8	0.0248499	-0.0242989	-0.0355572	0.0127669	-0.00487034	0.0267028	-0.0125852	0.0154226	0.00542879	0.00853877	0
196	0.0411333	-0.0247114	-0.0137302	0.0051553	0.0171995	0.016767	0.00804549	0.0281149	0.0451509	0.0175769	0
196.2	0.00654897	0.0332413	0.041045	-0.0164386	0.0220739	0.000129624	0.0142572	-0.040558	0.0380701	-0.00463062	0
196.4	-0.00171024	0.0421575	0.0309494	0.0232897	-0.0186301	0.0206178	0.0391469	-0.0104143	0.0247802	-0.0194243	0
196.6	0.0218115	0.0192032	0.0158287	0.0428537	0.00123716	0.0119993	0.0636768	0.0244577	0.00266294	-0.0501586	0
196.8	0.019433	-0.0274349	-0.0265653	-0.00895702	0.0297553	0.037593	0.0877891	0.0442685	-0.010383	-0.0132787	0
197	-0.0348617	-0.0401361	-0.0407405	-0.0055107	0.0237382	0.0491213	0.0313325	0.0364575	-0.010584	0.0146017	0
197.2	-0.0539387	0.0115465	-0.0254825	0.0575667	0.00705741	0.034363	-0.0108419	-0.0035006	-0.0152826	-0.0230861	0
197.4	-0.00115598	0.041539	-0.0248593	0.0509353	0.00529133	0.0283549	0.0164659	-0.0300427	-0.011518	-0.0240111	0
197.6	0.0107213	-0.0192634	-0.00524096	-0.00749665	9.0725e-05	-0.00707198	-0.0539234	-0.0127693	0.0108025	0.0363167	0
197.8	-0.0144426	-0.0262762	0.00709276	-0.0138887	-0.0315942	-0.024382	-0.0714217	-0.00976612	-0.0193192	0.000749084	0
198	-0.000792412	0.069142	0.0191026	0.00132232	0.00539047	-0.0420381	-0.0304391	-0.0379171	-0.0140504	0.023043	0
198.2	0.00535218	0.0738937	0.0349811	-0.054262	0.0100226	-0.0222506	-0.0145046	-0.0389153	-0.0367165	0.0515637	0
198.4	0.0236186	-0.0219663	0.0205692	-0.0530348	0.000871682	-0.0257837	-0.0349736	-0.0373578	-0.0489765	0.0491494	0
198.6	0.0533595	-0.0573222	0.0375532	-0.00649218	0.0037037	-0.0473584	-0.0537906	-0.0648233	-0.0273992	0.0268353	0
198.8	0.0355484	-0.00362593	0.0616841	-0.0323968	-0.0263525	-0.0213615	-0.0439368	-0.0575469	-0.0320125	-0.0126075	0
199	0.0089045	0.0131638	-0.0573964	0.0241189	-0.01397	-0.0270898	-0.00842016	0.01003	-0.0068967	-0.0189538	0
199.2	-0.0187514	-0.0334201	0.0567919	0.0175293	0.0035065	-0.00926491	-0.0158647	0.0073256	0.0280146	-0.0358331	0
199.4	-0.0463033	-0.0894164	0.0109712	-0.0209133	0.00448113	-0.0144094	0.0148168	-0.0199115	0.0083238	-0.00688865	0
199.6	-0.0359939	-0.0299248	-0.0751004	-0.0474882	-0.0197847	-0.0233531	-0.0234498	-0.0148224	-0.0158461	-0.00763826	0
199.8	-0.00178143	0.01307	-0.0642956	-0.0318177	-0.0214021	-0.0264962	-0.0806896	0.0274753	-0.00468513	-0.0203487	0
200	-0.00369974	-0.0121503	-0.0617368	0.00524372	0.00776223	-0.0293375	-0.0338085	0.031498	0.0153802	-0.0231992	0
200.2	-0.0291317	0.0439751	-0.0493989	0.00874557	0.0116236	-0.0141344	0.0269704	-0.0290874	0.0143237	-0.0642078	0
200.4	-0.00450878	-0.002555	-0.014953	0.0142141	0.0149343	-0.0109346	0.0508138	-0.000549989	-0.0145572	-0.0105083	0
200.6	-0.0176649	-0.0131449	0.0183436	-0.0123498	-0.0131374	-0.00968914	0.0892381	0.00503099	-0.0118789	0.0251864	0
200.8	-0.0255933	0.00874438	0.0140544	-0.050058	-0.0355129	-0.00904752	0.01578	0.0170157	0.0167258	-0.0217273	0
201	0.0180046	0.0428918	-0.0223738	-0.0072016	0.0126345	0.0179226	0.0225914	0.0378006	-0.00607897	0.00110545	0
201.2	0.0325035	0.0462571	-0.0119424	0.0549061	0.0362457	0.0604963	0.0637054	0.0434717	-0.00896996	0.055932	0
201.4	-0.0109748	0.00363618	0.0296977	0.056483	-0.00959732	0.0699303	-0.00974004	0.038896	0.0478735	0.00634328	0
201.6	-0.00517395	-0.0167503	-0.00403089	0.066411	0.0244606	0.0445207	0.0314466	0.0309523	0.0176854	-0.0241427	0
201.8	-0.0109255	-0.0544414	0.0195451	-0.00244059	0.025504	0.0213838	0.00197959	0.0398923	0.0233911	-0.0166379	0
202	-0.0127167	-0.0020877	-0.00863236	0.0271269	0.0111152	0.0178964	0.00744338	-0.0255119	0.0357821	0.0112836	0
202.2	0.0215503	0.00728255	0.0156743	0.00705117	-0.0198889	0.0211152	0.0128094	0.0197434	0.0490532	-0.0265594	0
202.4	0.0357123	0.0124765	0.0118198	-0.0192075	-0.0221587	0.0137593	-0.0199806	0.0646234	0.032155	-0.0110743	0
202.6	0.010065	0.0162205	-0.0402971	0.0131027	-0.00509898	0.000639386	-0.0192724	-0.00610999	-0.0180557	0.0566857	0
202.8	0.00413278	-0.0553505	0.0295062	-0.0198878	-0.0142147	-0.00431876	0.0284908	-0.0475904	-0.0385844	0.0136629	0
203	0.0060999	-0.00328586	0.0927993	-0.0453656	0.0115409	-0.00857	0.00130084	-0.0830574	-0.025896	-0.013702	0
203.2	-0.0119915	-0.00127017	0.0331806	-0.0340438	-0.0254125	-0.0217827	-0.0923124	-0.0475504	-0.0311406	-0.011319	0
203.4	-0.00742162	0.0154802	0.0105709	-0.00481456	-0.04243	-0.0368357	-0.0524867	0.0122647	-0.0272884	0.00928649	0
203.6	0.0164301	0.0363594	0.0338336	0.0215017	0.00363103	-0.0184085	0.00133279	0.0404941	-0.0311406	0.0192298	0
203.8	0.0149468	0.0119174	0.0199224	-0.00103112	0.0310184	-0.00767738	-0.0138792	0.0011663	0.0039221	0.00913964	0
204	0.00654236	-0.0259484	-0.0184611	-0.028799	0.00482918	-0.0273077	-0.0129504	-0.0468555	0.0459787	-0.0023475	0
204.2	0.02824	-0.0163837	-0.0391955	0.00176799	0.000895681	-0.0240989	0.00781578	-0.0218974	-0.0130704	0.00784772	0
204.4	0.00817592	0.0402531	-0.0734796	-0.043536	0.0198833	-0.0364829	0.00939639	-0.0275238	-0.0115898	0.0420917	0
204.6	0.0097801	0.00996552	-0.0432584	0.0201877	0.0148679	-0.0139233	-0.035559	-0.0107502	-0.0167482	0.0277553	0
204.8	-0.00631603	0.000493551	0.00653415	0.0498206	-0.00542581	-0.00217632	-0.0397693	0.00796974	0.00196137	-0.0126036	0
205	-0.0173825	0.0349111	0.0106021	0.0283468	-0.00749962	-0.00531451	0.0117139	0.00473899	0.0158913	-0.0142201	0
205.2	-0.00221381	0.0474151	-0.0169011	0.0206016	-0.00638785	0.00822454	0.0325325	0.0443841	0.0034911	-0.000514325	0
205.4	-0.00520045	0.0207744	-0.010151	0.0132621	-0.000596251	0.0146123	-0.006465	0.0692033	0.0258328	-0.00731072	0
205.6	-0.0287151	-0.0268732	0.0309799	0.0133041	0.034544	-0.0104106	-0.00785637	-0.0571398	0.0610189	0.010639	0
205.8	-0.0393922	-0.0324278	-0.000931061	-0.0453607	-0.0242275	0.00276856	0.0573247	-0.0193745	-0.0160523	0.00994707	0
206	-0.0196763	-0.0193031	0.00966173	-0.0719856	-0.0290229	-0.000899931	0.0147472	0.0117895	-0.0383194	0.0162944	0
206.2	-0.0113698	-0.0188125	-0.0319067	0.0114468	-0.0010109	0.00231562	-0.000526791	-0.011079	0.0414939	-0.0169972	0
206.4	0.00114877	-0.0273823	-0.0465096	0.0128256	-0.00765289	0.0179006	0.00963024	-0.0390171	0.0404021	-0.033609	0
206.6	0.0209259	-0.0400796	0.0171544	-0.086777	-0.0299961	0.0135217	-0.0250299	-0.0323635	-0.0505941	-0.00172417	0
206.8	0.0016611	-0.0682613	-0.00215422	-0.0535298	-0.0179847	-0.0151937	-0.0224268	-0.00707298	-0.0549862	-0.0164473	0
207	-0.0124404	-0.0788307	-0.0295714	0.0107358	0.0325824	-0.041715	-0.00121108	-0.0492939	-0.0451666	-0.0459389	0
207.2	0.0161289	0.0136997	0.00549209	0.0519055	0.00720428	0.00985297	0.0488126	0.00595438	-0.0115014	0.0164762	0
207.4	0.0183759	0.0373617	-0.0377781	0.0285424	-0.00872735	-0.00421734	-0.0395933	0.0100104	0.00790428	0.0264369	0
207.6	-0.000176879	0.072612	0.00945494	0.0722161	0.000927828	-0.020578	-0.0438949	0.0176134	-0.0289386	-0.00651074	0
207.8	0.0047651	0.0702438	0.0615305	0.0964112	0.0116424	0.00914239	0.0447875	0.0288413	-0.0200128	-0.0178065	0
208	0.0144225	-0.0284991	-0.011846	0.00321557	0.00763157	0.00958152	0.0213164	0.0114604	0.0423041	-0.0136086	0
208.2	-0.00548518	-0.00384308	0.0267748	-0.0172897	-0.0224269	-0.00584686	-0.00672921	0.0631861	0.00462045	0.0043564	0
208.4	-0.00714462	0.0351964	0.019237	-0.0268234	-0.00248171	0.00740084	0.00286569	0.00893063	0.00587309	0.0150628	0
208.6	0.00884364	0.0209018	0.0109397	-0.0224716	0.0120575	0.01286	-0.0223768	-0.031531	0.013939	0.0283643	0
208.8	-0.0255301	0.00271208	-0.0208685	0.00909694	0.00018325	0.0126228	-0.018772	-0.0171032	-0.032389	-0.0125395	0
209	-0.0329451	-0.00635243	-0.000393749	-0.000896873	-0.0182652	0.00639246	-0.0250414	-0.00487447	-0.00508532	-0.0283608	0
209.2	-0.0135213	-0.0418635	0.061694	-0.000690163	-0.0013014	-0.00459681	-0.0425575	0.0102619	0.0379543	-0.0173619	0
209.4	-0.0319166	-0.0611528	0.0260089	0.0496596	0.0251591	-0.000178626	-0.0117073	0.0518126	-0.0252295	-0.041414	0
209.6	0.0111601	0.00428204	-0.0482984	-0.0251884	-0.0208442	0.0145091	-0.000379945	0.0559843	0.0124718	0.00342773	0
209.8	0.0182502	0.0020423	-0.00753168	-0.0757467	-0.0135789	0.00962586	0.0441937	0.0410911	0.0268353	0.0188103	0
210	0.0159695	0.00605928	0.015097	-0.00937254	0.0211272	0.0533374	0.0294072	0.0331495	0.00350892	0.0236279	0
210.2	0.00798877	0.0213876	0.00804069	0.0552877	0.0516226	0.0393247	0.0231579	0.0169193	-0.00111397	0.037696	0
210.4	-0.0106404	0.0156169	-0.00917729	0.013734	0.0147976	0.00874887	0.0277861	-0.0294047	0.0191777	0.016752	0
210.6	-0.00881464	-0.00385781	-0.0378745	-0.0320687	-0.0450583	0.0279326	0.00177464	-0.0770657	0.0188687	-0.0256685	0
210.8	0.0152366	-0.00503689	-0.0358757	0.00563614	-0.0213977	0.00174999	-0.00384101	-0.0883258	-0.00955196	-0.0216514	0
211	0.00173471	0.0270861	-0.00942232	-0.0373389	-0.017854	-0.0256739	0.0073178	-0.0803575	-0.0122521	-0.0144255	0
211.2	-0.0159691	-0.0248086	-0.0154645	-0.0452426	0.0380661	-0.031435	0.0552506	-0.00919514	-0.0151505	-0.011758	0
211.4	-0.00368232	-0.0487473	-0.0203544	-0.00508693	0.00903999	-0.0257169	0.0107777	-0.00874124	0.00119645	0.00111978	0
211.6	-0.00761138	0.00696486	0.00368552	-0.0215469	-0.0353002	-0.0179921	-0.0015022	0.0085573	0.0334233	-0.00447292	0
211.8	0.00651989	-0.0213636	-0.00363332	-0.0249304	-0.00591947	0.00404137	0.0432153	0.00942555	0.0261435	0.00798988	0
212	0.0500755	-0.0606808	-0.0405056	0.0180619	0.0172366	0.019378	0.00995291	-0.0510931	-0.0153711	0.0488541	0
212.2	0.00962494	0.115537	0.00548428	-0.0384745	-0.000522742	-0.0112419	-0.0321045	0.0196915	-0.00599911	0.0260868	0
212.4	-0.0160798	0.0301432	0.0665167	-0.00283466	0.0146006	-0.0120127	-0.00722616	0.0373558	0.0148392	0.0122831	0
212.6	0.0244773	-0.0231102	0.0574827	0.00687387	0.02613	0.0192114	-0.0059688	0.0575767	-0.02895	0.017375	0
212.8	0.0278908	0.0352343	0.0272525	0.0451238	0.0238576	0.0432488	-0.0240141	0.0339595	0.00798575	0.00462715	0
213	-0.0034067	0.0315092	0.0321915	0.043809	0.0148994	0.0235616	-0.0274431	0.00702473	0.00554318	-0.0180912	0
213.2	-0.0058174	-0.0154435	0.0422232	0.00484384	0.0175571	-0.00368185	-0.00372524	0.0160096	-0.0456185	-0.0213717	0
213.4	0.0048391	0.00953841	0.029342	0.0259829	0.0304122	0.00830191	0.0414989	0.00574875	0.00604602	-0.00884724	0
213.6	0.00684385	-0.00690016	0.0272229	-0.00452633	0.00822417	0.00587501	0.0512247	0.0013658	-0.0201406	0.00378478	0
213.8	0.0162758	-0.0203902	-0.0147905	0.0734792	-0.00481756	-0.0195451	-0.0310593	0.00786216	0.0418544	0.0178128	0
214	0.0204489	0.0061871	-0.00733975	0.0181147	0.0351148	-0.0397869	-0.0907521	0.0149506	-0.000634336	-0.0104384	0
214.2	-0.00197332	0.0554209	-0.0314445	-0.0304649	0.0109919	-0.0336054	-0.0362028	-0.0126108	-0.0347733	0.00631378	0
214.4	-0.0012274	0.0958418	-0.0452941	0.000483305	-0.0199795	0.00241249	0.00680537	-0.0277385	0.00697251	0.0380513	0
214.6	0.0181755	0.0638239	-0.00210518	0.00525146	0.00394874	0.0189593	0.00241553	0.00288754	0.0168261	0.0157542	0
214.8	-0.0137473	-0.0507623	-0.0295878	0.00912962	-0.0235718	-0.0205183	0.0490267	0.017438	0.00615843	0.00196	0
215	-0.0157293	-0.0773897	-0.0497038	-0.0201655	-0.00657053	-0.023529	-0.0183709	0.0202611	0.00611643	-0.0157619	0
215.2	-0.0176885	-0.0256766	-0.0203325	-0.019384	-0.0250242	0.00434457	0.0265301	0.0120542	-0.0194529	-0.0097856	0
215.4	-0.0277473	-0.0475826	-0.0159828	-0.0130644	-0.0150548	0.00324236	0.00771429	-0.0176905	-0.00838936	-0.0337655	0
215.6	-0.0153339	-0.0470148	0.0193858	0.0242133	-0.0203566	0.0108848	-0.0224033	0.00912173	0.0140726	-0.039604	0
215.8	0.00254466	0.000135403	0.0462354	0.039949	-0.0377184	0.0259981	0.00730508	0.0536987	0.0200702	-0.00298061	0
216	-0.0103589	-0.0118441	-0.00420521	0.0176673	-0.0236536	0.00338767	0.0122936	-0.00697774	0.0184697	0.00337678	0
216.2	-0.0176909	-0.0173842	0.0133182	0.0745738	-0.0438586	-0.00262309	0.0319187	-0.0706735	-0.00816432	-0.0103768	0
216.4	0.00979666	-0.0270002	0.0403211	0.0223495	0.00798665	0.0239706	0.0117419	0.0313802	0.0106514	0.0386688	0
216.6	-0.0101739	-0.0201471	-0.0586222	-0.0458648	-0.00420822	0.00817843	-0.0132908	-0.0195403	-0.00198794	-0.00728457	0
216.8	-0.00892425	-0.00537148	-0.0799003	-0.0513668	0.0254022	0.0117288	0.00361578	-0.0204444	-0.0306685	0.0102632	0
217	0.0111508	-0.034255	-0.0170566	-0.0351125	0.0469437	0.0056495	-0.0346888	0.00567477	-0.0375413	0.0214463	0
217.2	0.0113794	-0.0374196	0.0116991	-0.0237131	0.0184791	-0.0154385	-0.0469039	-0.0451501	-0.0180763	-0.0335005	0
217.4	0.00787547	0.0246428	0.0129957	-0.0105336	0.0259237	0.0090055	0.0513745	-0.0246581	0.010932	0.0134329	0
217.6	-0.0218193	-0.019502	-0.0372015	-0.0272832	-0.0386752	-0.0199155	-0.0377044	-0.0172824	0.00281756	0.042258	0
217.8	0.0135565	0.057988	0.0136554	-0.00204125	-0.00264797	-0.035876	0.0207765	0.00744696	-0.0259293	0.00448851	0
218	0.0255115	0.110782	-0.0151811	-0.00661072	-0.0144024	-0.0141641	0.0397448	-0.0105084	0.0486172	-0.0232108	0
218.2	-0.0122926	0.0366352	-0.0039528	0.027765	-0.0192264	-0.00768466	0.0165627	-0.0120696	0.0625083	-0.00378899	0
218.4	-0.0174502	-0.0184029	0.066328	0.0489814	0.00375367	-0.0163272	0.0119599	0.00773629	-0.0012812	-0.00586829	0
218.6	0.020237	0.0283032	0.0463606	0.00904386	-0.000852903	-0.0113784	-0.0195917	0.0138741	0.00494429	-0.0392583	0
218.8	0.0160989	0.0367667	0.0140002	0.0191624	0.0301376	-0.00760895	-0.0282519	0.0307692	0.0264325	-0.0136709	0
219	-0.00245278	-0.0135609	0.0472235	-0.0427603	0.0348447	0.01194	0.0317077	-0.00341148	0.00345305	0.0198851	0
219.2	0.00644425	0.013124	0.0416646	-0.0110714	0.0107435	0.0249806	0.0272237	0.0550872	-0.0153685	0.0110003	0
219.4	0.00274212	0.0210315	0.0237255	0.0350446	0.0123562	0.0253453	-0.0100085	0.0262394	-0.0264808	0.0202957	0
219.6	-0.00518233	-0.046942	-0.0122887	-0.0169605	0.0286913	0.0119633	-0.000368723	-0.0170417	-0.0333017	-0.0163708	0
219.8	0.00466528	-0.0614298	-0.0320856	-0.053186	0.00276745	-0.0217299	0.0246982	0.0259041	-0.00697498	-0.0257756	0
220	0.0067035	0.00613024	0.0102096	0.0186215	-0.0359989	-0.0311008	-0.00542161	0.0392538	0.0188655	0.0451947	0
220.2	-0.0114672	-0.0246641	0.00553269	0.027891	-0.0145165	0.0256027	-0.0366257	0.0250422	-0.0153316	-0.0253825	0
220.4	-0.0237366	-0.0524532	-0.0538706	-0.0254108	-0.0382091	0.00181876	0.0301586	0.0366819	0.0380641	0.00638588	0
220.6	-0.0382092	-0.00932579	-0.0249291	0.0236337	-0.0182897	-0.0125719	0.00230669	-0.0123978	0.00305832	0.0319508	0
220.8	-0.048689	-0.00441946	0.0512269	-0.0231474	-0.00246227	0.0164999	-0.0502991	-0.0339366	-0.00528256	-0.0195828	0
221	-0.033892	0.0131185	0.025065	-0.0463437	0.0150995	0.0206684	0.0129125	-0.0005409	0.00906051	-0.019211	0
221.2	0.00462598	0.075689	-0.0556759	0.0553031	0.00506121	-0.0145522	0.0350204	-0.0133956	-0.0344039	0.0214737	0
221.4	0.0404578	0.0269191	-0.0448977	0.0199009	-0.0638183	-0.0206681	-0.0918548	-0.0664305	-0.0303986	-0.0286185	0
221.6	0.0491304	-0.0696319	-0.0457959	-0.0553199	0.019072	0.00771449	-0.0307731	-0.0357811	0.0135362	-0.0239139	0
221.8	0.00414832	0.0240385	-0.0445829	-0.0747655	0.0253631	-0.00463645	0.0243902	-0.00902254	0.016273	0.00215385	0
222	0.00289356	0.065261	0.0201787	0.00011919	0.0417884	-0.0228289	0.0173152	0.0178408	0.0336324	0.0184173	0
222.2	0.00772607	0.0184995	0.0279949	0.000860882	0.0419722	-0.00878316	-0.0345366	-0.0267599	-0.00939346	-0.0132989	0
222.4	-0.00664263	-0.00205452	-0.0104073	0.000697948	-0.0305218	0.00487611	-0.0563123	-0.0368424	-0.0512686	-0.044954	0
222.6	0.0025393	0.0144094	0.0223737	0.0678143	-0.0610352	-0.00269642	0.000954218	0.0446955	0.0083279	-0.0103038	0
222.8	0.0153322	0.0219658	0.0450435	-0.0162653	0.00624211	0.00186574	0.0535415	0.0126723	0.0249828	0.0326141	0
223	0.0197814	-0.0397126	0.00173212	-0.0214327	0.000260678	0.00101828	0.0601935	0.0196869	-0.00673652	0.0238453	0
223.2	-0.0107042	-0.0377079	0.0456714	0.0305133	0.0182299	0.00915985	0.0720498	0.0808615	0.0162481	-0.00396793	0
223.4	-0.0313502	-0.00538216	0.037185	0.0548413	-0.0202099	0.0390057	0.0345112	0.0656351	0.00835981	0.0177328	0
223.6	-0.0296215	0.0327939	-0.0254916	0.0359358	-0.0502886	0.0227606	0.00300337	0.0100463	0.00585417	0.0135581	0
223.8	-0.0156009	0.0577703	-0.0255865	0.0383843	0.00783516	0.00398626	-0.00922744	-0.0244746	0.0241046	-0.0130425	0
224	0.00577464	0.0269096	-0.00946827	0.0267748	0.0449187	0.0375566	-0.0359971	-0.0300417	-0.00560152	0.00506712	0
224.2	0.00967269	-0.00656939	-0.0450033	-0.0883902	0.0108602	-0.008167	0.0107568	0.0345713	-0.00812392	-0.0232691	0
224.4	0.017151	-0.0139747	0.00151712	0.0143868	0.000452615	0.00749049	-0.0253017	-0.0200897	-0.0247761	0.0102097	0
224.6	0.0172672	-0.0701874	0.0303281	0.0112557	0.00842626	-0.000822781	-0.00883769	0.00176568	-0.00319665	-0.0244428	0
224.8	0.0216801	-0.0824862	-0.0242228	0.00567359	0.00846618	-0.000945706	-0.0188229	-0.00558615	0.00606718	-0.0194467	0
225	0.0382318	0.00251796	0.00309572	0.0166861	0.00121331	0.00458532	-0.0431308	-0.0464821	-0.0209652	0.0347679	0
225.2	0.0430836	0.0755587	0.071528	-0.0243592	0.0138178	-0.0216517	0.010862	-0.0431059	-0.0108592	0.0312822	0
225.4	0.0233883	0.0496555	-0.016002	0.0111384	0.039411	-0.0281074	0.0493871	-0.055897	0.0325532	0.00717106	0
225.6	0.00584209	-0.000388147	0.0121012	-0.0168092	0.0107682	-0.0127286	0.0221979	0.0272553	-0.00253361	-0.0156115	0
225.8	-0.0224873	0.00741464	-0.0233297	0.0141643	-0.00169397	0.0268937	0.0128976	0.0443982	0.0183274	-0.0325403	0
226	0.0186196	0.0658214	-0.00494728	0.0441662	-0.0289967	0.00195795	-0.0105914	-0.00114154	-0.0121275	-0.0283171	0
226.2	0.0337198	0.0294807	0.0586441	-0.00452203	-0.0388034	-0.0330761	-0.0225652	0.00204592	-0.010048	-0.00443657	0
226.4	-0.00418664	-0.0533665	0.0658884	-0.0499752	-0.0216185	-0.00641472	0.00171113	0.0188686	0.0237743	0.0254274	0
226.6	-0.00925864	-0.0293864	0.0134966	-0.00118693	-0.00745571	0.0213593	0.00505901	-0.0026143	-0.00993913	0.0251746	0
226.8	-0.0140853	0.0150638	-0.0335807	0.0455378	0.0124865	-0.0105622	-0.0248687	0.0186384	-0.00603843	-0.0166599	0
227	-0.000822062	0.0136011	0.0373557	-0.021234	-0.0267701	-0.0299363	-0.00395663	-0.00204991	-0.00540662	-0.0062134	0
227.2	0.025101	0.0207018	0.00846259	-0.0303757	-0.0177767	-0.00835227	-0.0291405	-0.00712977	0.0683345	-0.0306007	0
227.4	0.00269454	0.0186128	-0.0535207	0.00721036	0.00432399	0.0198882	0.00229726	0.00420107	0.0468506	0.0137796	0
227.6	-0.014312	-0.0117144	-9.55566e-05	0.060053	0.0107446	0.0324816	0.0321963	0.00488235	-0.0157191	0.0212257	0
227.8	0.00780676	-0.0268321	0.038158	0.0454679	0.0211643	0.0269757	0.00824811	0.025875	0.00516967	-0.0141793	0
228	-0.00291438	-0.0263574	-0.0321167	-0.0325673	0.030752	0.0117767	0.0374691	0.0481889	0.0215429	0.0384629	0
228.2	-0.0320707	-0.0586979	0.0296697	0.0531573	0.0278909	0.0125517	0.0569464	-0.0318069	0.000555731	-0.0312992	0
228.4	-0.0270601	0.0151463	-0.0119143	-0.00706203	-0.0229104	0.0163669	0.017384	-0.0572349	-0.0166492	-0.0383075	0
228.6	-0.0271029	-0.0120737	-0.106197	-0.0496795	-0.0458018	0.011018	-0.0519715	-0.0291412	0.00149356	0.0219175	0
228.8	-0.0124767	-0.0121229	-0.0656176	-0.0151734	0.00521844	0.0136987	-0.0236016	-0.0185589	-0.041083	0.0160026	0
229	0.00506674	0.0148679	0.0477596	-0.0270942	0.0246439	-0.00123151	0.0182508	-0.0401072	-0.0682189	-0.0291884	0
229.2	-0.00859834	-0.0258764	0.0510534	-0.0515174	-0.0093128	-0.0377469	-0.027241	-0.0173824	-0.0116543	-0.0217167	0
229.4	-0.014845	-0.00682451	-0.0116914	-0.00135098	0.0135007	-0.0394289	-0.0532295	0.0477277	-0.0178955	0.000115944	0
229.6	0.00297138	-0.0239382	0.0105748	-0.0686191	-0.00289292	-0.0334298	-0.076978	-0.023398	-0.0375513	0.0158558	0
229.8	-0.016136	-0.0242338	-0.0112138	-0.0731319	0.0238555	-0.0373941	-0.00244597	-0.0134615	-0.0126799	0.0249715	0
230	-0.00243107	-0.000444322	0.00565949	-0.00872852	0.0289114	-0.0586766	0.00441686	-0.0306644	0.0124834	0.0234164	0
230.2	0.0066159	0.0395614	-0.00066698	0.0267508	-0.0198262	-0.0480635	-0.0209835	0.0196516	-0.025272	0.0192716	0
230.4	-0.01815	0.0273678	-0.0282279	0.00532342	-0.0413481	-0.0106108	-0.0206496	0.0510426	-0.0187099	0.0141292	0
230.6	-0.00313343	-0.0125792	0.0301146	-0.00984117	-0.00135684	-0.000273533	-0.0136882	-0.0562024	0.0451934	0.00835387	0
230.8	0.0373749	0.0462866	0.0374344	0.0315095	0.020433	0.00549974	0.0525529	-0.00144598	-0.0195201	0.0139925	0
231	0.00256716	-0.0295613	-0.0766528	0.0502387	0.0169931	0.0221277	-0.00522605	-0.0460517	0.0477185	0.0115168	0
231.2	-0.00993674	-0.0402858	-0.0085827	0.0319999	0.0187946	0.00886645	0.0279092	0.0243915	-0.00373345	0.00592614	0
231.4	-0.02368	-0.0073983	0.00326713	-0.0216085	-0.00519962	0.0123079	-0.00835411	0.0353418	-0.00817674	-0.0176004	0
231.6	-0.0261688	-0.0364186	-0.0407061	-0.0358254	-0.0176711	0.00267972	-0.0897845	-0.0250646	0.0201062	-0.0222375	0
231.8	0.00552699	-0.0495149	0.00561831	0.011462	-0.00807875	-0.0244073	-0.00163346	-0.00367468	-0.0174303	0.00167045	0
232	0.0195408	0.0147479	0.0203075	0.0281171	-0.0247972	0.0075615	0.10645	0.0317925	0.0104691	0.000239258	0
232.2	0.0216208	0.0181396	0.0250463	0.0137071	-0.00804109	0.032182	-0.0273261	0.0309468	0.0153169	-0.0175731	0
232.4	-0.00175232	0.0478762	-0.0365787	0.0538451	0.00350328	-0.000276558	-0.0187813	-0.00288619	-0.0108067	-0.0352476	0
232.6	-0.000728978	0.0417914	-0.0533573	-0.010821	-0.0180947	-0.0155338	0.0152445	-0.0137176	0.0276963	0.00593691	0
232.8	0.00354433	0.00181497	-0.0352347	-0.0691574	-0.0169287	-0.0111794	0.00710296	0.00317101	0.0131508	0.00439746	0
233	-0.0132204	-0.0206935	0.00350043	-0.0484708	-0.00316333	-0.0130395	-0.0113862	0.00716334	-0.0223027	-0.0471784	0
233.2	-0.0297454	-0.0311644	0.0367251	-0.0346364	-0.00825686	6.20433e-05	-0.018209	-0.000504466	0.0315834	-0.0302711	0
233.4	-0.0312492	-0.0404094	-0.00891974	-0.000245694	0.0167574	0.0235501	0.0345335	0.0101312	0.0504328	0.0242777	0
233.6	-0.0135719	-0.0126745	0.000700679	0.05939	0.035823	-0.00323301	0.0683343	-0.00708576	0.0221616	-0.00642942	0
233.8	-0.00478204	-0.0221622	0.00604666	0.0524536	0.00271279	-0.00219628	-0.00183796	-0.0291533	-0.0201569	-0.0138247	0
234	-0.0135279	-0.0464906	0.052377	0.0111147	0.00780808	0.0156181	-0.0122011	0.00742136	-0.039024	0.046393	0
234.2	-0.00688389	-0.00606019	0.0651479	-0.00440226	-0.00976565	0.0173114	0.00798212	-0.00241946	-0.0472108	0.0483861	0
234.4	0.00723186	0.0492253	0.00838292	0.0116474	-0.0338213	0.0135318	-0.0179712	-0.0481084	-0.0388518	-0.000633021	0
234.6	0.000214644	0.0161173	-0.0259532	0.0346963	0.00925858	0.0202584	-0.0105339	-0.00501755	-0.00230101	0.0174402	0
234.8	0.0160946	-0.0177078	-0.0291629	0.0422773	-0.0119624	0.035119	0.016954	0.00934109	0.0157676	0.0308309	0
235	0.0563814	0.0566106	0.0226561	0.00944418	0.0286856	0.0571706	-0.044079	-0.0466318	0.0348589	0.0222703	0
235.2	0.0266087	-0.00776307	0.00229872	-0.0799782	0.0033258	-0.00561112	-0.0267467	-0.00456391	-0.00155749	0.00788268	0
235.4	-0.00943956	-0.0270916	-0.0318068	-0.0784499	-0.00983859	-0.0246654	-0.00776176	-0.00200604	-0.0399244	-0.0122549	0
235.6	0.00944471	0.034074	-0.0063998	-0.0164579	0.0177369	-0.0175964	-0.0155435	-0.00713	-0.0300442	-0.0275097	0
235.8	0.0234605	0.0361099	0.00856079	0.00680896	0.00870759	-0.0364584	0.0123654	0.0416655	0.000671592	-0.0134284	0
236	-0.00304966	0.0378197	-0.0290793	0.020499	-0.00545623	-0.00705466	0.03272	0.0186287	0.0282609	0.00316052	0
236.2	0.00317791	0.0382721	-0.0164903	-0.0123947	0.0196295	-0.0328175	0.0341079	0.0479873	0.0424841	-0.0325745	0
236.4	-0.0104427	0.051219	-0.0119374	0.0319119	0.0165707	-0.00709581	0.0208588	0.0446325	-0.0295066	0.00323667	0
236.6	-0.0118426	0.00802352	0.0228731	0.0867512	0.000439131	0.0202409	0.0289268	0.0253928	-0.00426069	0.0143173	0
236.8	0.00518849	-0.0264714	0.0331284	-0.00185908	-0.00428068	0.0259259	0.0201913	0.0104707	0.0381531	-0.0365093	0
237	0.00678191	-0.000694347	0.0229751	-0.0507273	-0.0158136	0.0181198	0.000546438	0.00681796	0.00551945	-0.0382181	0
237.2	-0.00409617	0.00301883	0.0362316	0.0276805	-0.017412	-0.00845172	0.0104782	-0.0221424	-0.00705842	0.017688	0
237.4	0.00335102	-0.0549366	0.00740614	-0.0410889	0.022229	-0.0201129	0.0196788	-0.0779801	0.0217612	-0.00881418	0
237.6	0.00079559	-0.0706553	-0.0168084	0.0195786	0.00534243	0.0132774	0.0274768	0.0284108	0.02621	-0.0464449	0
237.8	-0.0353724	-0.0728939	-0.0243969	0.00234817	0.00773756	0.0310578	-0.0144394	-0.00214937	-0.00229385	0.0101913	0
238	0.0060571	-0.00491774	0.03814	-0.0329223	-0.00734766	-0.00408406	0.000743328	-0.0318914	0.00667562	0.00699425	0
238.2	0.0243437	0.017547	0.0210101	-0.00084812	-0.000382853	-0.00534213	-0.0211093	-0.00424247	0.0114972	-0.00139667	0
238.4	-0.0374081	-0.0442136	-0.0507765	0.0293154	0.0250843	0.0101496	-0.0915594	0.0189029	-0.00196375	0.0300061	0
238.6	-0.0135062	-0.0410881	0.0215929	0.0276898	-0.00833355	-0.0278564	-0.0221095	0.0457895	0.0158241	-0.0183109	0
238.8	0.0699612	0.00324062	0.0600102	0.0337549	-0.0200078	8.30438e-05	0.0844191	0.0123068	-0.00681571	-0.047501	0
239	0.00063594	0.0480512	-0.0149151	-0.0306087	-0.0123382	-0.000724529	0.0311851	0.0411879	-0.0387211	0.00648643	0
239.2	-0.0367877	0.0287375	-0.0318127	0.0237432	0.00525399	0.00298976	0.0153171	-0.00336562	-0.009218	0.0393956	0
239.4	-0.03041	-0.012014	-0.00433152	0.0121725	-0.0118383	0.0135417	-0.00730209	-0.0061348	-0.0176821	0.0152945	0
239.6	-0.0237724	-0.00332	0.0122074	-0.0371264	-0.03533	0.000783048	-0.0499915	-0.00666615	-0.0481438	0.0207549	0
239.8	-0.0183199	0.0346407	0.0187456	0.000373082	-0.0236962	-0.0201789	-0.0394302	-0.0654631	-0.0133881	0.0375054	0
240	-0.0298038	0.049124	-0.00421743	-0.0404255	-0.0100125	-0.0195781	-0.0354418	-0.013632	0.0119101	-0.0182351	0
240.2	0.0141434	0.0622135	-0.0291949	-0.0594129	0.00182853	-0.0198739	-0.0360214	0.0155126	-0.0133972	0.00165862	0
240.4	0.0141327	0.0148165	-0.0295555	-0.0273085	-0.00976575	-0.0223992	-0.0247667	-0.034563	0.0278721	0.0134174	0
240.6	0.0313159	0.00122043	-0.00601704	-0.0257973	0.0114493	-0.0159475	0.0320783	-0.0431195	-0.00842224	0.0404551	0
240.8	0.0283824	0.0171263	0.0114708	-0.0142003	0.0399967	-0.0100013	0.0264175	0.000393602	-0.0233965	0.0185077	0
241	0.0169856	-0.0044668	0.00444701	0.00276256	0.0356825	0.0103089	-0.0230685	0.0140169	0.019645	-0.0278824	0
241.2	0.0442239	-0.0236539	0.0062943	-0.024846	0.0142362	0.0309248	0.00352022	0.00592689	-0.00449215	-0.0187067	0
241.4	0.0195733	0.0211059	0.0322433	-0.00643008	-0.00133579	-0.00715395	0.0279523	0.0319627	-0.0130536	-0.0358779	0
241.6	0.027608	0.0183853	-0.0186526	0.0537522	0.019919	-0.0128159	0.00757895	0.00958662	0.0115334	-0.0281697	0
241.8	0.0455494	-0.0687662	-0.0579838	0.0560704	-0.0141496	0.0210957	0.00616294	-0.0108678	0.0218216	-0.0253219	0
242	0.000616188	-0.0454388	-0.00708131	0.056264	-0.0165933	0.0230915	-0.0129249	-0.00800179	-0.00612734	-0.0192966	0
242.2	-0.0258691	0.0330058	0.0356567	0.0373162	-0.00233584	0.0246538	-0.0121869	-0.00860615	-0.0166709	0.00419779	0
242.4	0.000380309	0.0208661	0.0182413	-0.00148166	-0.00926992	0.0228309	0.00298845	0.0194231	0.00633549	0.0031272	0
242.6	-0.0108055	0.000199535	0.00397473	0.0321677	0.00819343	-0.0146223	-0.0152443	0.0842853	0.014943	-0.015747	0
242.8	-0.0156359	0.0203625	-0.0351601	0.061396	-0.0119298	0.0257206	0.0515875	0.0548335	0.0261878	0.0391952	0
243	-0.0132104	-0.0192615	-0.0120902	-0.0168181	-0.0104048	0.00440162	0.0727499	-0.00416832	0.0285404	0.0258329	0
243.2	-0.00414431	-0.0237004	0.030282	0.0174948	0.00720698	0.0103229	0.0625973	0.00825768	0.0229885	0.00432437	0
243.4	-0.02821	-0.0168717	0.0343252	0.0172866	0.0131781	0.0273065	0.0302717	0.0480918	0.0291978	0.0153907	0
243.6	-0.0374762	-0.018307	0.0565868	-0.0556493	-0.0178366	-0.00563995	0.0127314	0.0356707	0.0136003	0.0180802	0
243.8	0.000194411	0.0320567	0.0995059	-0.0358515	-0.0303935	-0.0250952	0.00528278	-0.00341056	-0.00432715	0.0105909	0
244	-0.00209099	0.0735323	0.0241002	0.0170918	0.0317662	0.0146359	-0.0325493	0.00263736	0.0280549	0.0274275	0
244.2	-0.016735	-0.0231545	-0.112279	0.0226244	0.0120924	-0.00193212	0.025423	0.021363	-0.0185737	0.0231834	0
244.4	-0.00486874	-0.0163242	-0.0402499	-0.0200938	-0.0316961	0.0158233	-0.00646985	0.000338951	0.0121751	0.0109206	0
244.6	-0.0122325	-0.00547567	-0.0571327	0.00896682	-0.00350432	0.0110284	-0.0255419	-0.0620091	0.0254717	-0.0228323	0
244.8	-0.000350504	-0.00795222	-0.0855533	0.0036753	0.0168394	-0.00774928	0.00218573	-0.0652831	-0.0255957	-0.0432346	0
245	0.0244972	0.0196997	-0.00666325	-0.0348504	-0.00265657	0.00223759	-0.0208941	-0.0185029	-0.0476053	-0.0184841	0
245.2	0.0236757	0.0222862	0.0332118	0.0134609	0.0086522	0.0115403	-0.0697813	-0.0208326	-0.0222678	0.00915103	0
245.4	0.059518	0.0125263	0.0820553	0.00497833	0.0238975	0.00453427	-0.041363	-0.0384219	-0.032246	0.00445499	0
245.6	0.035048	0.0202519	0.0444355	-0.0319137	0.0440387	-0.0115528	-0.0305292	-0.0517788	-0.037147	0.0142746	0
245.8	0.00663913	0.00680638	-0.00532999	-0.0166291	-0.0099624	-0.0228694	-0.0161305	-0.00946677	0.00494934	-0.0450851	0
246	0.00122993	-0.0259661	-0.0167317	0.0176465	-0.0153838	-0.00980644	-0.0124767	0.000799444	0.0139348	-0.0167613	0
246.2	-0.0139368	-0.0868989	-0.0050351	-0.0246393	0.00265566	-0.00155977	-0.0208527	-0.0152185	-0.0299152	0.0300669	0
246.4	-0.0400396	-0.0902639	-0.0055869	-0.0415903	-0.0363556	-0.010615	-0.00398949	-0.0135744	-0.0415774	-0.0144977	0
246.6	-0.0465823	0.0194744	-0.0330933	0.0467426	-0.0472944	-0.00517409	0.0300502	-0.0103634	0.00769719	-0.015332	0
246.8	-0.0451514	0.0131712	-0.0453188	-0.0557511	-0.024926	-0.00622888	0.0221977	0.0519977	0.0326752	-0.000697206	0
247	-0.0291497	-0.000915538	0.0340426	-0.0772506	-0.00738057	-0.0184713	-0.00547431	0.0390774	0.0145993	-3.53544e-06	0

## Sheet: fly3
Time	gamma-L5	gamma-L4	gamma-L3	gamma-L2	alpha-L	gamma-R5	gamma-R4	gamma-R3	gamma-R2	alpha-R	stimulus			Time	gamma-5	gamma-4	gamma-3	gamma-2	alpha	stimulus
0											0			0	0.00308546	-0.000192169	-0.00371504	-0.00992181	-0.000217039	0
0.2											0			0.2	-0.00361072	0.00100709	-0.00255468	-0.000486118	0.0102687	0
0.4											0			0.4	-0.00245438	-0.0107507	0.00693765	0.00540395	1.14451e-05	0
0.6											0			0.6	-0.00368068	-0.0179354	0.00141047	0.0020843	0.0120925	0
0.8											0			0.8	-0.00130567	-0.00271249	0.00738017	-0.00541979	0.00096778	0
1											0			1	0.00180932	0.0121902	0.00591973	0.0110142	-0.00478249	0
1.2											0			1.2	-0.000462767	0.0233064	-0.0101623	0.00852383	-0.00317245	0
1.4											0			1.4	0.00504102	0.0154606	-0.00148759	0.006222	0.000691111	0
1.6											0			1.6	0.00289857	0.015065	0.0114365	0.00237289	0.0193219	0
1.8											0			1.8	-0.00924528	0.0107744	0.00164561	-0.0147815	0.0151331	0
2											0			2	0.000571971	-0.00499541	-0.00314987	0.0170297	-0.000744796	0
2.2	-0.0106999	0.0329547	0.0185543	-0.00917251	0.0278851	-0.0161783	-0.0391223	0.0428542	-0.0419977	-0.0395566	0			2.2	0.0114365	-0.00781887	0.0010677	0.0142421	-0.00241555	0
2.4	-0.00777472	0.0702496	0.00817748	-0.0144215	0.0201016	-0.0185071	0.00267605	0.0172301	0.0046253	-0.0154101	0			2.4	0.0105971	-0.0140948	-0.00568603	0.00260549	-0.0123817	0
2.6	-0.00831462	0.0297701	-0.00334721	-0.0047681	-0.0285993	-0.0168122	0.0127285	-0.0542416	0.0509593	0.0218762	0			2.6	0.00671681	0.00605431	0.000118384	0.00315709	-0.0103416	0
2.8	-0.0224775	-0.0349293	-0.0215442	-0.0235876	-0.014987	0.019174	-0.00528732	-0.000419201	-0.0315872	-0.041819	0			2.8	0.00284122	0.00169686	0.00172931	-0.0156714	0.00877382	0
3	-0.0273426	-0.0294707	-0.0228632	-0.0183984	0.017996	0.00799887	0.0325952	0.0220374	-0.0333708	0.017292	0			3	0.0064471	-0.0188417	0.0102228	-0.0183151	0.00427827	0
3.2	-0.0263543	-0.0155301	-0.00840346	0.0161038	-0.0214969	0.0224886	-0.00585103	0.0189762	0.0364478	0.0202334	0			3.2	0.0018202	0.00463946	-0.00463441	-0.00445258	-0.00424899	0
3.4	-0.00455375	-0.0227291	-0.0207817	0.0263323	-0.0575708	0.0347063	-0.0406512	0.00546461	0.0352488	-0.00664369	0			3.4	0.00206123	0.014917	-0.0106936	-0.00787812	0.000925722	0
3.6	-0.000523133	-0.0124797	-0.0207849	0.0171666	-0.0308951	0.0106793	-0.0122564	-0.0155647	-0.0391329	0.0308478	0			3.6	0.00225498	0.0148171	0.00950505	0.000273446	0.00567009	0
3.8	-0.029638	0.00511749	0.0172476	-0.00201204	0.019236	-0.00875801	-0.0113122	-0.0322054	-0.046544	0.0377267	0			3.8	-0.00936042	-0.0103283	-0.000500721	0.0108919	0.00942237	0
4	-0.0119118	-0.0151954	-0.000509143	-0.0425981	0.0453323	-0.00419567	-0.0245824	-0.0306796	0.0150666	-0.0117381	0			4	0.00602487	-0.0247579	-0.0168245	0.0122907	0.00121437	0
4.2	0.013891	-0.00884813	-0.0370125	0.0215284	-0.0231868	0.0375878	-0.00835754	0.0479749	-0.0533296	0.0212168	0			4.2	0.0126162	-0.00371487	-0.00443682	0.0164904	-0.00762925	0
4.4	-0.00468709	0.0146473	-0.00923886	0.0319986	0.00262994	0.0287089	-0.0468399	0.0511593	-0.0441524	-0.0353467	0			4.4	-0.00299666	0.0048789	-0.0110966	0.0062714	-0.00818264	0
4.6	-0.00668263	0.0141628	0.0162023	-0.0233084	-0.00984541	-0.0174401	0.0118615	0.0123816	-0.0342041	0.0186301	0			4.6	-0.0127517	0.0193031	0.0106679	-0.0124922	-0.000420301	0
4.8	0.0327677	-0.00233864	-0.0057434	-0.0292993	-0.0282248	-0.0296476	0.0231909	-0.0348278	-0.0312461	0.00859786	0			4.8	-0.0123787	0.0110251	0.0202376	-0.00936246	-0.00415552	0
5	0.01788	0.0101705	-0.0109215	-0.0188567	0.0013652	-0.0149134	-0.0332986	-0.0458628	0.00867961	-0.0678237	0			5	-0.00177409	0.0140675	0.00844218	-0.00163333	0.0103868	0
5.2	-0.042345	0.0326466	0.025363	-0.0416281	-0.00916197	-0.0234297	0.0304844	-0.0159304	0.0166252	0.032274	0			5.2	0.00760168	-0.00361668	0.00510333	-0.00444828	-0.00403358	0
5.4	0.0237598	-0.0117098	0.0149267	0.0313817	0.027447	-0.0259016	-0.00842642	-0.0724404	0.0114462	-0.0138946	0			5.4	-0.00416454	-0.0143318	-0.00839704	-0.00108153	-0.0244732	0
5.6	0.0273273	-0.0471067	-0.005769	0.0177339	0.0597464	-0.00578685	-0.0698592	-0.0206625	0.039888	0.0273767	0			5.6	-0.0203834	-0.0108071	-0.00738344	-0.00342077	0.00255934	0
5.8	0.0253574	-0.0419313	0.00531856	-0.00589424	-0.0186221	0.00334649	0.00745728	0.0469719	0.0517239	-0.0153967	0			5.8	-0.00547663	0.00614128	0.00342977	0.00183638	-0.00392596	0
6	0.0104266	0.0115693	0.0107507	-0.000946931	-0.0155523	0.010491	0.0409801	0.013993	0.0238554	-0.0461618	0			6	0.00153941	-0.00627348	0.0053071	-0.0107174	-0.00950999	0
6.2	-0.0307616	0.0281966	-0.0011433	-0.0031705	0.0243725	0.00613686	-0.00122943	-0.0282239	-0.00451655	0.0134334	0			6.2	-0.00268766	-0.00963532	-0.00230267	-0.00720544	0.00798483	0
6.4	-0.0174786	-0.00862454	-0.00920794	-0.0104721	-0.0104947	-0.0217578	0.000479675	0.00813404	0.00184544	0.0169779	0			6.4	0.00319606	-0.013123	-0.00540642	0.00450773	0.0134845	0
6.6	0.0283734	0.00423226	-0.00763628	-0.00642597	0.0165539	-0.0285864	0.00487955	0.0294068	0.00706738	-0.0445125	0			6.6	0.00507802	-0.0140802	-0.00853184	0.00967599	-0.0070706	0
6.8	-0.0528139	0.0151113	0.0196897	-0.00782636	0.00349995	-0.00219964	0.0180568	-0.00400109	-0.0413918	0.00926313	0			6.8	0.00542628	0.00111059	0.00918828	0.00549693	-0.00528715	0
7	-0.0138797	0.0233581	0.0152241	0.0421924	-0.0230452	-0.0286564	0.00622951	0.00450079	-0.0352928	0.0086738	0			7	0.0152555	0.0215094	0.0094206	0.0063813	0.00212849	0
7.2	-0.00511093	-0.0200682	-0.0038812	0.0157803	-0.0345016	-0.00829017	0.0302831	0.00242142	-0.0102241	-0.0574205	0			7.2	0.00441438	0.00613069	-0.0145329	0.00494643	-0.00874503	0
7.4	-0.021419	-0.036943	0.00389201	-0.0116384	-0.0150729	0.0116136	0.0344003	-0.0212121	-0.00292743	-0.0340316	0			7.4	-0.0154945	0.00274046	0.0226085	0.00931814	0.024618	0
7.6	-0.033457	0.014238	-0.00782027	0.0255912	0.0118185	-0.00115187	-0.0139383	-0.00878473	0.0264969	0.0313205	0			7.6	-0.000299338	0.0185603	0.0221366	0.028536	0.0361058	0
7.8	-0.0443346	0.034321	-0.0402989	0.0206897	-0.0101844	0.0151319	-0.0340516	0.00658129	0.0391338	0.00889606	0			7.8	0.0098139	0.0263029	0.0131674	0.0319967	0.0130237	0
8	0.0478861	-0.0167396	0.00165419	-0.0309162	-0.0372954	0.0173663	-0.00239448	-0.0371253	-0.0327171	0.00471004	0			8	0.0045013	0.0191506	0.0231349	0.029495	0.0116488	0
8.2	0.00252105	-0.0370438	-0.00514374	-0.0175573	0.0743026	0.00254032	0.023719	-0.000767251	0.0185667	0.0345548	0			8.2	0.00855325	0.0195957	0.0204833	0.0328778	0.0139743	0
8.4	0.0184265	-0.0146788	-0.000999291	-0.0039218	0.00675937	0.00523746	0.00758795	-0.0206261	0.0239326	0.0435624	0			8.4	-0.00241668	-0.0039416	0.0281099	0.0402712	-0.0061634	0
8.6	0.0388038	-0.0227883	0.000816212	0.00932693	-0.0540523	-0.0084952	-0.0215611	0.00243301	-0.00664793	0.0159181	0			8.6	-0.00158303	0.00979803	0.00984997	0.0220789	0.0125671	0
8.8	0.0101979	-0.0684515	-0.0065203	-0.00712137	0.0165709	-0.0255933	0.0101619	0.0403902	-0.0152305	-0.00075012	0			8.8	-0.00468927	-0.00386248	0.00938857	0.029326	0.0219137	0
9	-0.0105347	-0.0216098	0.0137906	-0.0204447	0.0672218	0.00571386	0.0314174	0.0293401	-0.0179925	0.0213899	0			9	0.000675378	-0.00470393	0.0326662	0.0240871	0.0114547	0
9.2	-0.00870232	0.0796737	0.0238387	0.0247087	0.0214612	0.0310247	-0.0366857	0.0472112	-0.00936098	0.0387519	0			9.2	0.0194131	0.0255707	0.0151465	0.0186922	0.004224	0
9.4	0.0190886	-0.0299246	-0.0419466	0.00958761	-0.0389899	-0.0355312	-0.0179725	0.0391343	0.0205473	0.0114529	0			9.4	0.0039302	0.00596995	0.0197776	0.0424112	0.01594	0
9.6	0.0198484	0.0209779	-0.0238044	0.0107816	0.0195765	0.00364797	-0.00274594	0.00269784	-0.00505152	-0.0132943	0			9.6	-0.00154174	0.00765545	0.025134	0.0319329	0.0220863	0
9.8	0.0249957	0.0583983	0.0312669	-0.0368639	0.0250006	0.0451974	-0.0413276	0.0274033	-0.0549294	-0.0120394	0			9.8	0.0067749	0.0163864	-0.00529099	0.0193767	0.0179967	0
10	-0.0027358	0.0583851	0.0558884	-0.0216684	0.0341911	0.0135671	-0.00598252	0.00992352	0.000485424	-0.00471198	0			10	0.0271363	0.0261572	0.0489693	0.0312714	0.0130082	1
10.2	-0.00689591	0.0531063	0.0488947	0.0214978	0.0226844	-0.0122877	0.0329839	-0.00587573	0.056998	-0.0150224	0			10.2	0.0838585	0.0689827	0.12261	0.0838096	0.0584622	1
10.4	0.0348113	0.0101132	0.033547	0.0207748	-0.0506953	0.00748829	0.0096886	0.00801122	0.00855379	-0.0140319	0			10.4	0.143878	0.123481	0.142439	0.117118	0.0703723	1
10.6	-0.00327668	-0.00823893	0.0139206	0.0674683	-0.0297952	0.00103073	0.0443407	-0.0781304	0.000170649	0.0148951	0			10.6	0.13535	0.151635	0.134777	0.120684	0.0550646	1
10.8	-0.0321488	-0.0191609	-0.0285437	0.00203654	-0.0159373	-0.0250029	-0.0237852	-0.0301933	-0.00635972	-0.0153939	0			10.8	0.135291	0.128949	0.150299	0.117994	0.0424945	1
11	0.0124735	-0.0605812	-0.0370133	-0.0323679	0.0153506	-0.00533542	0.010089	-0.0123959	-0.0251374	-0.012783	0			11	0.119585	0.147753	0.130735	0.121641	0.0390812	1
11.2	-0.00300119	6.19724e-05	-0.0208611	0.00600898	-0.0106139	0.0293693	-0.0556701	0.0309727	-0.0134956	-0.0351953	0			11.2	0.106678	0.131833	0.118133	0.11446	0.0492796	1
11.4	-0.0334588	0.0293316	0.0030402	0.00895189	-0.0579574	0.00973989	-0.056569	0.0328849	-0.024333	-0.0317778	0			11.4	0.076432	0.119599	0.114389	0.096241	0.0222716	1
11.6	-0.00675134	-0.0277485	-0.0138628	-0.0125936	-0.0397058	-0.0427577	0.0492782	-0.0289841	-0.0193553	0.00597911	0			11.6	0.0587982	0.118418	0.0837172	0.0717512	0.0242443	1
11.8	-0.00242859	-0.0107247	-0.0606565	0.00127475	0.0231228	-0.0411193	0.0262101	-0.0402426	0.042063	0.017137	0			11.8	0.0649068	0.101086	0.0783908	0.0726139	0.0213086	1
12	-0.0361981	0.0201989	-0.0206778	-0.023496	0.0478499	0.00463531	0.023273	-0.0336802	0.00423932	0.0371096	0			12	0.0446757	0.0692649	0.0671466	0.0536482	0.00260425	1
12.2	-0.00840389	-0.0239347	0.00726316	0.00728544	0.000555548	-0.0137634	0.00176536	0.0092766	-0.028287	-0.0630425	0			12.2	0.0331656	0.0620067	0.0444925	0.036302	0.01184	1
12.4	0.0311631	-0.0130065	-0.00248175	-0.0149477	0.00995076	-0.00110034	-0.0105301	0.0360843	-0.00138217	-0.0167177	0			12.4	0.0388124	0.0780597	0.0585941	0.0599107	0.00376222	1
12.6	0.0100203	-0.022131	0.0066442	-0.0375176	-0.006641	0.0380793	0.0103146	0.00325156	0.0199213	0.0348813	0			12.6	0.0330065	0.0602452	0.0499143	0.0375991	-0.0252082	1
12.8	-0.0276276	-0.0215509	0.00469138	-0.00977935	-0.0474496	0.0352127	0.00354041	-0.0183313	0.0102054	0.00741527	0			12.8	0.00525882	0.0521631	0.0374197	0.0212501	-0.0119524	1
13	-0.0161776	0.00940662	-0.00849722	-0.00103254	-0.00775106	0.0148476	-0.0233804	0.00366836	-0.000423453	-0.0146821	0			13	-0.000883051	0.0358236	0.0365431	0.0526354	-0.020566	0
13.2	0.0162864	-0.012137	0.024488	-0.0146518	0.0477918	0.0294177	-0.00220864	-0.0112237	0.0100291	-0.0245251	0			13.2	-0.00362953	0.0246217	0.0226171	0.0513613	-0.0250112	0
13.4	0.0144709	0.0429922	0.0131395	0.041693	-0.00232492	0.00951855	-0.00693205	-0.0423942	0.0416817	0.0238228	0			13.4	-0.00386756	0.0449285	0.0322826	0.0193003	-0.0140611	0
13.6	-0.0268014	0.0347868	-0.0135153	0.0114826	0.00926567	-0.0444649	0.00510771	0.00776853	0.00927219	0.0251203	0			13.6	0.00529157	0.0379049	0.0445568	0.0177435	-0.0103276	0
13.8	-0.0039736	0.00814653	0.0247067	-0.000411413	-0.0052365	0.0121448	0.0222063	0.0286988	0.00658468	-0.0340729	0			13.8	-0.0238898	0.00955977	0.0372889	0.0229662	-0.0208322	0
14	0.0114996	-0.0173447	0.0130035	0.00829067	-0.00464481	0.0178532	-0.0196593	0.0512622	0.00178776	-0.0158676	0			14	0.000407376	0.0210049	0.00787136	0.00814166	-0.00510367	0
14.2	-0.00421857	-0.0235713	-0.0165341	0.0037851	0.0273643	-0.0121485	-0.0197702	0.0234691	-0.0127304	0.0562882	0			14.2	0.00677579	0.00327356	0.0123553	0.0158247	-0.00148459	0
14.4	0.00958946	0.0101082	0.0232283	-0.00129327	0.0274092	0.0228611	0.0468592	-0.0362394	-0.00337244	0.0461616	0			14.4	-0.0067836	0.0126298	0.0238087	0.0197126	-0.034508	0
14.6	0.017714	0.0297551	0.009288	-0.0146721	0.0254799	-0.036741	0.00162895	0.0508531	-0.0153983	-0.00176068	0			14.6	-0.00835541	0.0270586	0.0227707	0.0186006	-0.0189018	0
14.8	0.0331217	0.0338815	0.00851765	0.0261159	-0.00917515	-0.0269168	0.000777536	-0.00485605	0.0188001	0.000257123	0			14.8	0.00152879	0.0207215	0.0278159	0.0135829	-0.00303404	0
15	0.0300294	0.0331658	0.0242446	0.0208205	-0.0275881	-0.00364913	0.0350777	-0.0207269	0.0294709	0.00703162	0			15	0.0120915	0.0248309	0.0162153	-0.00376757	-0.00268553	0
15.2	0.0143335	0.0102233	0.0246363	-0.0272302	-0.00488071	0.00376526	0.00048296	0.00302524	0.0129127	0.0174508	0			15.2	0.0057485	-0.00724175	0.00643331	-0.000711447	-0.0221314	0
15.4	-0.00185904	-0.0211561	0.0345099	-0.0154828	0.00157121	0.0233108	-0.0189063	0.0142515	0.00272653	-0.0312709	0			15.4	-0.00979553	-0.00314491	-0.00320367	-0.00850718	-0.0329316	0
15.6	0.0105042	-0.00748592	0.0367579	0.0223878	-0.00513462	0.0458968	0.00406363	0.00344512	-0.0148794	-0.0564744	0			15.6	-0.0123717	0.0232518	-0.0180389	0.00264277	-0.0146968	0
15.8	0.0262123	0.0232917	-0.00183214	-0.0011722	0.0154776	0.0299693	-0.0113439	-0.0163898	-0.0402026	0.0214801	0			15.8	-0.0141915	0.0127503	-0.00218355	-0.00234869	-0.0257384	0
16	-0.0277697	-0.0206	-0.0137328	0.00237114	0.00791767	-0.00230459	0.00767122	0.00501457	-0.0159896	-0.00660103	0			16	-0.0107756	-0.019388	-0.00210205	-0.0122232	-0.0322902	0
16.2	-0.00131925	-0.00977046	-0.034155	0.0111632	0.0167267	0.0220062	0.00432568	-0.00553236	-0.000221075	0.00831143	0			16.2	-0.00474423	-0.00241541	-0.00545132	0.00272291	-0.0115239	0
16.4	-0.0185261	-0.0346242	-0.0587975	0.0225217	0.00451892	0.00997167	0.0309029	0.00886643	-0.00426972	0.0312817	0			16.4	-0.0225932	-0.00554614	0.00350734	0.00124666	-0.0159224	0
16.6	-0.0051239	-0.0207317	-0.0165514	0.00317057	-0.00364065	0.00839615	0.00886457	0.0212999	0.020204	-0.0406998	0			16.6	-0.00619487	-0.0282676	-0.0133548	-0.017858	-0.015893	0
16.8	0.0221443	0.0147867	0.00764927	-0.0150661	-0.0425302	0.00856579	-0.0029848	0.00547805	0.0305844	-0.0415414	0			16.8	0.00933406	0.0226351	-0.018108	-0.00920586	0.0115393	0
17	-0.00835653	0.00531381	-0.0401146	-0.0037872	-0.0623698	-0.0326053	0.0231351	-0.00556486	-0.0239963	0.0419822	0			17	0.0053092	0.0302155	-0.00626057	-0.00546509	-0.003362	0
17.2	-0.0213473	0.00844316	-0.0362356	-0.00949713	0.0266696	-0.0570177	-0.0448895	0.00199756	-0.0425898	-0.00225584	0			17.2	-0.00348214	-0.00949226	-0.00700562	-0.00395642	-0.0170134	0
17.4	-0.0359063	-0.0101563	-0.00491989	-0.0216425	0.0114278	-0.0630423	-0.072567	-0.0033726	0.0500681	0.0372442	0			17.4	0.00491154	-0.014686	0.00404765	0.00187127	-0.00942774	0
17.6	0.00967395	0.00953269	-0.00364836	-0.0326345	0.0122651	-0.0250622	-0.0217315	-0.052099	0.0149307	-0.0157722	0			17.6	0.0204564	-0.00156776	-0.0152107	-0.00300119	0.0192139	0
17.8	-0.0222137	-0.0387546	-0.00742974	-0.00688516	0.00464035	0.00783523	0.0123579	0.0184104	-0.0230868	-0.0099135	0			17.8	0.00452535	-0.000903433	-0.00466557	-0.00340449	-0.0105259	0
18	-0.0195513	-0.0367499	0.00496283	0.00617475	-0.0158787	0.00591408	0.0245989	0.0553687	-0.00210108	0.00502471	0			18	0.00595304	-0.00438984	0.0148346	-0.0100518	-0.00431085	0
18.2	0.017494	0.0467307	0.0216851	0.00102829	-0.0120561	-0.00585315	0.0212946	-0.0284867	-0.0192761	-0.0243274	0			18.2	0.00137686	-0.00434045	0.00250821	-0.00559766	0.0190191	0
18.4	-0.0216324	0.0341666	0.0136374	0.0148916	0.00700385	0.00189384	0.00113285	-0.0534414	-0.0506451	0.00177555	0			18.4	-0.00993884	-0.00960126	-0.00241642	8.06652e-05	0.0119794	0
18.6	-0.00667255	-0.0456653	-0.0073417	0.0175254	0.0196975	0.0106836	0.00693172	-0.000143694	0.00404442	0.0246688	0			18.6	-0.00675819	-0.012177	0.00739637	-0.000965043	-0.00556212	0
18.8	-0.008328	-0.00122181	0.0441751	0.0292905	0.0279826	-0.0180823	-0.0169572	-0.0171318	-0.00263267	-0.0330795	0			18.8	-0.0196724	-0.0294124	0.0100243	-0.0147936	-0.00778731	0
19	0.0124894	0.00230013	0.0287868	-0.00399319	-0.00339711	0.000696498	0.0140634	-0.0177949	0.0439831	0.00718311	0			19	-0.00824374	-0.0129897	0.0111497	-0.00404092	0.0144635	0
19.2	0.0157159	0.000494816	0.00785106	0.00984474	-0.0206386	0.0477441	0.0415465	0.0152182	0.042486	-0.0538817	0			19.2	0.00373632	0.0301996	-0.0151615	-0.00578293	-0.00282161	0
19.4	0.00226404	0.0303328	-0.00787512	0.0199048	0.0051304	0.0116654	0.0263041	0.0164701	0.0127618	-0.0431079	0			19.4	-0.0180993	0.0261945	-0.00998569	0.00867551	-0.0170923	0
19.6	0.00992982	0.0136218	-0.038104	-0.0278761	0.0409672	-0.0297772	-0.0160087	-0.00231228	0.03055	0.0626233	0			19.6	-0.00508608	0.0037833	0.0052756	0.00341865	-0.00208606	0
19.8	0.0107071	-0.0264637	-0.0200497	-0.0339696	0.0112178	0.0300316	-0.0314538	0.00833568	0.0271544	-0.0202136	0			19.8	0.00188166	-0.0198734	-0.00959648	-0.00430173	-0.010024	0
20	-0.0186108	0.0175434	0.0132706	-0.00694454	-0.102803	-0.000812398	0.0378106	0.00289229	-0.00590309	-0.000576583	0			20	0.00318075	-0.0105043	-0.0260308	0.0156751	-0.0195683	0
20.2	0.00466467	-0.0300728	-0.0151163	-0.0236211	-0.0427559	-0.0279637	-0.0290684	0.00347945	-0.029917	0.02119	0
20.4	-0.00483764	-0.0146669	-0.0147876	0.0210288	0.020558	-0.0161465	-0.00251376	-0.0145191	-0.0449118	0.0107468	0
20.6	-0.0357417	0.0301826	-0.00484593	0.0495781	0.0203381	0.0124489	0.0262975	0.0342956	-0.0237709	-0.0270989	0
20.8	-0.0310541	0.0180924	0.00723572	0.0110046	0.014714	0.0271025	-0.0147455	0.0614814	-0.00242876	-0.025842	0
21	-0.00307592	-0.0011703	0.0221813	-0.0112716	0.0147931	0.0140271	-0.0235354	-0.0259304	-0.0190821	0.0206598	0
21.2	0.0180986	-0.00778765	-0.00508412	0.00196921	0.000842922	-0.010457	-0.0194679	-0.0492111	-0.0131736	0.0167877	0
21.4	0.0317358	-0.0591427	0.000884423	-0.00975783	-0.0276528	-0.0152793	-0.0113377	0.0172743	0.0324676	0.0107982	0
21.6	-0.00746711	-0.0350149	-0.018152	-0.0267584	-0.0168975	0.0156243	0.00626232	-0.0697434	0.0312908	0.0207193	0
21.8	6.02414e-05	0.0277159	0.000348096	-0.0216548	-0.0107176	-0.00296065	0.0242284	-0.0253067	-0.00335126	0.00536208	0
22	0.0222063	0.0354464	0.0118716	-0.0273734	-0.0119352	-0.02402	-0.0133005	0.0437209	-0.0102985	-0.0134621	0
22.2	0.00880199	0.00422939	-0.0171768	-0.0159649	0.0152441	-0.00453434	-0.0396083	-0.0256991	-0.0151681	-0.0165027	0
22.4	0.00294669	-0.00634364	-0.0157751	0.0224163	0.0437765	-0.0117004	0.0112113	-0.0580478	-0.0285748	-0.0217048	0
22.6	-0.0080102	-0.00664564	0.00732241	-0.0120591	0.0144232	-0.0417545	0.00463759	-0.00145823	0.00854457	-0.0196895	0
22.8	-0.0425531	0.0201527	-0.0164384	-0.0122621	-0.025654	-0.00335305	-0.036629	0.0544679	-0.0443669	-0.0195051	0
23	0.00138087	0.04013	-0.0134575	0.0322598	-0.00858922	0.0264184	-0.034728	-0.00480071	-0.0636402	0.000782059	0
23.2	0.0145359	-0.0441226	0.0182694	0.00880228	0.0216596	0.0120498	0.046199	0.00474752	0.0239232	0.0336905	0
23.4	-0.0134527	-0.0720183	0.00927217	-0.00152912	0.0138605	-0.0129443	0.0642162	0.0474004	0.0433124	0.00809361	0
23.6	0.0124692	0.0178559	-0.0122848	0.0263368	-0.0055215	-0.00332678	-0.0279564	0.0194941	-0.0107594	-0.000473677	0
23.8	0.06532	0.0316614	0.0100519	-0.0150066	0.0157751	0.0229354	-0.044741	0.00544365	0.0286704	0.0673636	0
24	0.0587795	0.0233382	-0.00656882	0.0142021	0.0533759	5.51466e-05	0.0446286	-0.0324294	0.0117503	-0.0144203	0
24.2	-0.0199135	-0.00923051	0.0222208	0.0323681	0.0123381	0.0292203	0.0286965	-0.0210558	0.0310185	0.019078	0
24.4	-0.00240039	-0.00844528	0.00820358	-0.00460359	-0.0186657	0.0268558	-0.00163007	-0.0348122	-0.00685421	0.0276233	0
24.6	0.00857785	0.00897628	0.00153114	-0.00586998	-0.0152995	0.00767848	0.0401964	-0.00480512	0.000202369	-0.00159981	0
24.8	-0.0366346	0.000829647	0.00358419	0.00747211	-0.0279296	0.00738723	0.0423932	0.0237727	0.0456555	-0.0061683	0
25	-0.0336714	-0.00409643	-0.0146406	-0.0298899	-0.0433034	0.00698632	-0.035169	-0.00490257	0.0212436	-0.0149577	0
25.2	0.00187337	0.00751717	0.013517	-0.0312153	-0.015438	0.00353004	-0.0446873	0.0260884	0.00667325	-0.0128629	0
25.4	0.0323994	-0.0413392	-0.0091225	0.0195844	-0.00299905	-0.0206445	-0.0305452	-0.0139864	-0.0113642	0.0360787	0
25.6	0.017465	0.00904156	0.0271129	0.021809	-0.00346748	0.0119611	-0.0560905	-0.0373575	-0.0438967	0.039439	0
25.8	0.000783111	0.016509	-0.0217438	0.00134506	0.0107587	0.029601	-0.00414413	0.0474986	-0.00428096	0.0153782	0
26	-0.0202896	0.0261258	-0.0413857	0.0153746	0.019871	0.00947376	0.0562101	0.0725254	0.0133098	-0.00209164	0
26.2	-0.0260303	0.0541694	0.0171566	0.0145832	0.011644	-0.00652501	0.0595335	-0.00132928	-0.0134891	-0.0130647	0
26.4	-0.00580539	0.00477399	-0.00414624	-0.0198893	0.0151472	-0.0148611	0.0489723	-0.0126521	0.0110247	-0.0313126	0
26.6	-0.0298566	0.0124358	-0.014204	0.0023346	0.0296957	-0.0216598	-0.0311546	-0.00604973	-0.000616974	-0.0555559	0
26.8	0.0159499	-0.0136019	-0.0289952	-0.0375194	0.0181479	-0.00934491	-0.0678663	-0.0167827	-0.0153853	-0.0188819	0
27	-0.00273979	-0.0412036	-0.0372964	-0.0132169	0.0317691	-0.00778372	-0.0623261	-0.00140717	0.0159052	-0.0204661	0
27.2	-0.0363723	-0.0409994	-0.00307325	0.0155171	-0.0276391	-0.0346348	0.00300403	0.0205856	0.00322043	-0.0171949	0
27.4	-0.0230577	0.000664062	0.0341026	0.0349619	-0.0521398	-0.0175253	0.0753282	0.0308609	-0.00282168	-0.00983148	0
27.6	-0.000131648	0.0174472	0.0353911	0.0302188	0.0136961	0.0444018	0.0379421	0.0236402	0.0196734	-0.0354844	0
27.8	0.0168359	-0.0349904	0.0237718	-0.0424965	-0.00727288	0.0271101	-0.0573617	-0.00176309	-0.0232738	-0.028097	0
28	0.0291695	0.00457585	-0.0105199	0.00398936	-0.00888717	-0.0456545	-0.000854792	-0.00565765	0.00344872	0.0318012	0
28.2	0.029522	0.0358523	-0.0221943	-0.0273493	-0.00342344	-0.020092	0.0262208	-0.0468082	0.0081689	0.0578466	0
28.4	0.00387318	0.0279082	0.0134297	-0.0246959	-0.0166504	0.00867576	0.0479795	-0.0233128	-0.00923431	-0.0314834	0
28.6	-0.00774942	-0.00163344	0.0310564	-0.00297656	-0.0081581	0.00722492	0.0780041	0.0471908	-0.00921418	-0.0242281	0
28.8	0.0113827	-0.0218947	0.0242028	-0.00539262	0.00809365	0.00176997	0.0296433	0.0361332	-0.00296928	0.0338144	0
29	0.0124495	-0.0186892	0.0229255	0.00534152	-0.00840395	-0.00261083	-0.0613597	-0.0450313	-0.00992561	-0.0141495	0
29.2	-0.015577	-0.0175097	-0.00197436	-0.00982306	-0.0209511	0.012726	-0.043299	-0.0615296	-0.0110742	0.0154887	0
29.4	-0.00179705	-0.0178085	-0.00221565	-0.0307453	-0.0226026	0.0188113	-0.0114587	-0.0543818	-0.0103777	0.0143155	0
29.6	-0.0315027	-0.00700665	-0.0291744	-0.00270278	0.0159866	0.0033561	-0.0250326	-0.0053521	-0.0210467	0.0214906	0
29.8	-0.0138751	-0.0226986	-0.0176759	0.0616694	0.00840277	0.00642958	-0.0247692	0.0585314	0.0112958	0.0485156	0
30	0.0203334	-0.00335004	0.0208333	0.0398157	0.0224829	0.0184613	-0.0180114	0.0398927	0.0236082	0.00100191	0
30.2	-0.003921	0.0232319	0.0103219	-0.0211987	0.0670951	0.00117337	-0.0132633	-0.0178557	0.00374357	-0.0685942	0
30.4	-0.017317	-0.00731104	-0.0281853	0.0109743	0.0110488	-0.0237221	0.00823873	0.00813167	0.0184939	-0.011376	0
30.6	0.0213839	0.0434672	-0.0200863	0.000861455	-0.0607053	-0.00494541	-0.0205672	0.0384847	0.00219827	0.062514	0
30.8	0.0424492	0.0354125	0.00484817	-0.0393162	-0.0314082	0.0134903	-0.0517106	0.026511	0.0259508	0.0183297	0
31	-0.00224952	-0.0175086	0.00470411	-0.0306622	0.0163318	-0.0251366	0.0250683	0.0210109	0.00201866	-0.0204641	0
31.2	0.0157518	-0.0238691	-0.00436212	0.0140009	0.0250371	-0.0360572	0.0262626	-0.0331283	-0.015942	0.00205405	0
31.4	0.0171972	0.0039665	-0.015517	0.00723398	0.0105074	-0.00264876	0.00895498	-0.0382777	-0.015891	0.0138302	0
31.6	-0.0410401	0.0033474	-0.0144836	-0.0161777	-0.00885329	0.00184121	0.0709662	0.017111	-0.0350326	-0.00277826	0
31.8	0.0126718	-0.00130688	0.0263723	0.0262309	-0.0180622	-0.0102277	0.0360439	-0.0241068	-0.0232116	-0.0106927	0
32	0.0170477	0.0362067	0.0404615	-0.00547387	0.00439591	0.0114954	0.015619	0.0213099	-0.00181095	-0.0574095	0
32.2	0.0204153	0.0295169	-0.0149897	-0.0040123	-0.0132072	-0.00722377	-0.0109198	-0.0329184	-0.0176941	-0.00186714	0
32.4	0.0156702	0.00933918	-0.0200292	-0.0216249	0.021022	0.00331076	-0.0202878	-0.0613915	-0.0174353	0.044463	0
32.6	-0.00925488	0.0127254	0.000354435	-0.0135501	0.00903862	0.0519354	-0.0411199	-0.0321936	0.0313133	0.0140357	0
32.8	-0.0337902	0.00256851	-0.0159538	0.0292963	-0.0283067	0.0396459	-0.0348787	0.00223713	0.0440996	-0.0275298	0
33	-0.0238834	-0.00749656	-0.0239168	0.0282516	0.00391313	-0.0244113	0.0160174	0.0321588	0.00825279	-0.0135795	0
33.2	0.0078753	0.0193425	-0.0127369	0.0137144	-0.0342502	-0.0152117	-0.0170929	0.0257022	0.0347045	0.0285551	0
33.4	-0.0396828	-0.0852539	-0.0404572	-0.00814986	-0.00563894	-0.0197282	-0.0454993	0.0438386	-0.00264682	-0.0153131	0
33.6	-0.00451433	-0.0688331	0.0069571	-0.00939961	0.0281084	-0.0153095	-0.0466761	-0.0010151	0.00167161	-0.0244491	0
33.8	0.0102549	-0.0206445	0.0392476	0.02388	0.0345343	0.000246523	-0.000463301	-0.0113497	-0.0147722	-0.00959153	0
34	-0.00752682	0.0202163	-0.000992783	0.0308709	0.0284171	-0.00118655	0.0234388	-0.000902284	-0.0368534	-0.011335	0
34.2	-0.00195167	0.0384124	-0.00873311	0.00320981	0.0173908	-0.00960481	-0.000902514	-0.0111808	-0.019437	-0.00465021	0
34.4	-0.0223012	-0.0186379	0.0366087	-0.0032732	0.0136792	-0.00545103	0.0150115	0.0151308	-0.0161783	0.0250876	0
34.6	-0.0201398	0.0284349	0.00371726	-0.0215037	0.0221637	-0.0139623	0.0536375	0.00231804	-0.00240424	0.0461319	0
34.8	0.0139334	-0.0223094	0.0282392	-0.0254252	-0.0152082	0.0012973	0.0194174	-0.0528388	0.000174841	0.0282626	0
35	-0.00133082	-0.05388	0.0249571	-0.0383579	-0.0420787	0.0256364	0.0370329	-0.0144593	0.00114393	-0.0357941	0
35.2	-0.0395735	0.0138003	-0.00493254	-0.0402405	-0.0421198	0.029305	-0.000604106	0.041281	0.0317692	-0.0239994	0
35.4	-0.0261548	0.0346543	-0.0233055	-0.0253951	-0.0296324	0.0149855	-0.0558779	0.00959668	0.0203427	-0.00342695	0
35.6	0.00868871	-0.00510355	-0.0188871	0.000892821	0.00493279	-0.00804475	-0.0249385	-0.0168016	-0.00837675	-0.0423323	0
35.8	0.0084046	0.0406719	0.00865988	0.0368374	0.053433	-0.0264065	-0.0252757	0.0241265	0.0575754	-0.0100524	0
36	0.0525606	-0.00715467	-0.0207858	0.010034	0.0541362	0.000638458	0.0222202	-0.0387634	0.00336834	-0.0197089	0
36.2	0.0413836	-0.00198783	0.0254853	-0.00404869	-0.00329085	-0.0156507	0.0294954	0.0216928	-0.0267153	0.0228516	0
36.4	-0.00284849	0.0271583	0.0214895	0.0131613	-0.000338416	0.0160285	0.0244122	0.0174462	-0.0037265	0.0168105	0
36.6	-0.00209162	0.0105905	-0.0175374	0.0190648	-0.0135029	0.0409657	-0.00541587	-0.0259795	-0.027737	0.0053373	0
36.8	0.0132569	-0.0162226	-0.0136816	0.00366017	-0.0408836	0.00148432	-0.00761498	0.0289886	-0.0375867	0.0138955	0
37	0.00376003	-0.0106582	0.00674846	-0.00711864	-0.00608456	-0.0232396	0.0222482	0.0671138	0.0331147	-0.0120408	0
37.2	0.0237942	0.00870788	0.0350214	-0.00143261	-0.033706	-0.0271259	-0.0603801	0.000251822	0.0287638	0.0238275	0
37.4	-0.00325445	0.051542	-0.00183646	0.0305067	0.0112497	-0.0232449	0.00199702	-0.0111146	0.0352507	0.0469052	0
37.6	0.019086	0.00430277	-0.0148071	0.00523646	0.0102129	0.0351	0.0026021	-0.0275309	-0.0148718	-0.00445237	0
37.8	0.0253635	-0.0417213	-0.00805435	-0.0061761	0.0161342	0.00606103	-0.000408534	-0.0026579	-0.00492237	-0.0298227	0
38	0.00646643	0.00505707	0.0234405	0.0200024	0.00605928	-0.0417321	-0.000278498	0.0125435	0.0411213	0.0244667	0
38.2	-0.0112775	0.0269919	0.0142874	0.0185375	-0.0471204	-0.00113869	-0.0192635	-0.00707466	0.0164091	0.0202466	0
38.4	-0.0462819	-0.0339254	-0.0556267	-0.00422404	-0.0168669	0.00968581	0.0258138	0.0205486	-0.0366393	-0.0727204	0
38.6	-0.000982872	0.0206526	0.0400101	0.00725562	0.053609	-0.00944424	0.0092606	-0.0160771	-0.0819556	-1.34725e-05	0
38.8	0.0381871	-0.00206335	-0.0239425	0.014126	0.00459964	-0.0108131	0.0112963	-0.0404748	-0.0178285	-0.00265385	0
39	0.000889736	-0.0119417	-0.050942	-0.0122087	-0.0229935	0.0169169	0.0133003	0.0200994	0.0146828	-0.0388193	0
39.2	-0.0249931	-0.011856	0.0117847	-0.018414	0.00340475	0.0317537	0.0125888	0.0101775	0.00488225	-0.00185476	0
39.4	-0.0140202	-0.0126058	0.0207826	-0.0299779	0.00492024	-0.00662074	0.0105714	-0.011268	0.0187792	0.0335473	0
39.6	-0.0225999	0.00186644	-0.0282875	-0.0467572	-0.0221535	-0.0356899	0.000828525	0.040312	0.0289752	0.0143471	0
39.8	-0.0284245	-0.0241888	-0.0330587	-0.00550181	-0.0223378	0.0189244	0.00438966	-0.0186893	0.00626042	0.0194859	0
40	-0.0259833	-0.000164665	-0.000427918	-0.0653113	0.00860172	0.0156589	-0.00573434	-0.00622871	0.0063585	-0.0210123	0
40.2	-0.0188244	-0.0097415	0.0243617	0.0547234	0.00399233	-0.0180823	-0.055787	-0.00185826	-0.0258287	0.00419903	0
40.4	-0.000339381	-0.0143564	-0.0149658	0.0446842	0.0129423	-0.00394023	-0.0538532	-0.0337057	-0.0194655	0.0340197	0
40.6	-0.0124849	-0.00926342	-0.0043128	-0.0504527	0.047538	0.00709119	-0.00496815	-0.0139597	-0.00793721	-0.0098031	0
40.8	-0.0100015	-0.0119321	0.0428219	0.00857476	0.0198301	-0.00662401	0.0214701	0.0171105	-0.00554514	-0.0364954	0
41	0.0385	0.00149934	0.00977333	0.0676934	-0.0467384	0.00572336	0.0324549	-0.0253421	0.0280617	0.00606358	0
41.2	0.00251609	0.016555	0.0262472	0.00976228	0.00618614	0.0151061	0.0480919	-0.0186313	0.00772861	-0.0132579	0
41.4	0.0290682	0.0296954	0.026723	0.0496421	0.0226773	0.055066	0.0195477	0.0145983	0.0201463	0.0167604	0
41.6	0.0321927	0.00161227	0.0171854	0.0399181	0.019731	0.0174221	0.0404744	-0.0125436	0.0256411	0.0291442	0
41.8	-0.0190434	0.00408425	-0.0110763	-0.0328768	-0.0178199	-0.0161477	0.0176927	-0.000952502	0.030061	0.0285421	0
42	-0.00994198	0.0520847	0.00527845	-0.0201448	-0.0149105	-0.0133514	-0.0092388	0.0187933	0.0176456	0.0199429	0
42.2	0.0400521	0.0298696	0.0428333	0.0232754	0.0305994	-0.00215772	-0.00196994	-0.0130665	-0.0314938	0.00277611	0
42.4	0.0110807	-0.0501238	-0.0235648	-0.0370538	-0.000233859	0.0253771	-0.0526337	0.00618076	-0.0474461	0.0164452	0
42.6	0.0281813	0.0211362	-0.0666351	-0.00696577	0.0108451	-0.037356	-0.00341792	0.0314875	0.0053828	0.0156071	0
42.8	-0.00223657	0.00211945	-0.0335403	-0.0225753	-0.0181378	-0.0658442	-0.00759862	-0.0028489	-0.00480753	-0.0172848	0
43	-0.00997664	-0.0276587	-0.0172696	-0.0129748	0.0125886	0.000223271	-0.00348953	-0.0484146	-0.0272651	-0.0167536	0
43.2	-0.011485	-0.0295079	-0.00790644	-0.0226971	-0.015624	0.029008	-0.0174981	-0.0430236	-0.0160026	-0.0449009	0
43.4	-0.0277944	-0.0196338	0.00220195	-0.0385746	-0.0750042	-0.00957336	-0.0483428	-0.00596671	0.00385662	-0.0609873	0
43.6	-0.0219533	0.00425426	-0.0112795	0.01394	-0.0298537	-0.00935318	-0.0228222	0.004177	0.00275492	-0.00976713	0
43.8	-0.0142066	-0.0153739	0.00227709	0.017428	-0.029497	0.0157233	0.00318383	-0.00719196	-0.00636477	-0.0155266	0
44	0.0082527	-0.0285874	0.0176485	-0.0239323	-0.0105824	0.0050195	0.00238382	0.0123048	0.0268284	0.0338877	0
44.2	-0.0145285	0.023552	0.0164572	-0.00587152	0.0234249	0.00821993	-0.0132866	0.0140794	0.000885029	0.0213617	0
44.4	-0.0228679	0.0366992	0.0283342	0.0234401	0.0530942	0.0120469	0.0620695	0.0484065	-0.0240295	-0.00590469	0
44.6	0.00324102	-0.00548203	0.0393015	0.00369854	0.00125412	0.00393849	0.0418266	0.0208981	-0.0356676	0.0293011	0
44.8	0.0286884	-0.00159572	0.00503092	-0.0112503	-0.0400651	-0.0184837	-0.0586076	-0.032397	-0.0404634	0.051292	0
45	0.0267398	0.0447828	-0.0320873	0.0266968	0.0401782	-0.0491583	0.0168551	0.0205831	0.00931832	0.013873	0
45.2	-0.017815	0.0249035	0.00742443	0.0415251	0.0275804	-0.0317119	0.0407989	-0.0107863	0.0469101	0.0217295	0
45.4	0.00652135	0.0255451	-0.00769318	0.0214108	0.0354835	0.0114902	0.00212317	0.0169668	0.0073857	-0.0550044	0
45.6	0.0227962	-0.0192151	0.0237769	-0.00702422	0.020431	-0.00536304	-0.0243224	-0.022229	0.0156394	-0.0481082	0
45.8	0.0116794	-0.0238326	0.041792	0.00421053	0.0183808	0.00675473	-0.00332067	-0.0301107	0.0127981	0.00830841	0
46	0.0095531	0.0130166	0.0193312	0.0127059	0.0283623	0.0210463	0.0043787	-0.00188543	-0.0134644	0.00965818	0
46.2	0.000549649	0.0118585	0.00588866	-0.0109414	-0.0142572	0.00231362	-0.0310087	-0.014015	0.00394758	-0.0106818	0
46.4	-0.00732099	0.0183186	-0.024031	-0.0102752	-0.0518981	0.0481792	-0.0303847	0.0237578	0.0116193	-0.00148024	0
46.6	0.0577783	0.0176584	-0.0224081	-0.018845	0.00839038	0.0237123	0.00936623	0.0274295	-0.012354	0.01291	0
46.8	-0.0176198	-0.0280283	-0.00848835	0.0175952	0.00275946	0.0155846	-0.010507	-0.0416998	-0.00538725	0.00452631	0
47	-0.00572206	-0.0384197	0.00284445	0.0124145	0.00254011	-0.00631486	-0.00345869	-0.0181895	0.0138062	-0.00850098	0
47.2	-0.000676424	-0.0136143	0.00358969	-0.00829113	-0.0283953	-0.00522461	-0.00192257	0.0145792	-0.00182386	0.0319581	0
47.4	-0.0417782	-0.0173873	-0.0165478	-0.00640195	-0.0490402	-0.000641864	-0.0112418	-0.0211416	-0.0177959	0.0507863	0
47.6	0.0170513	-0.013243	-0.021642	-0.0140303	0.0314575	-0.0370514	0.00817438	-0.014343	0.00689621	-0.0241655	0
47.8	-0.00188147	0.0433681	0.0210165	-0.00964042	0.0384649	-0.0193672	-0.0208748	0.0304837	0.00967677	-0.0462049	0
48	-0.0258197	-0.0211135	-0.0117012	-0.0152862	-0.0119106	-0.0303092	0.0303757	0.036866	-0.0208804	-0.0104582	0
48.2	0.00944451	-0.021174	-0.00572799	0.0116834	0.0254114	0.0157616	0.0648047	0.0303295	-0.00589923	-0.0261825	0
48.4	0.00540858	0.000160792	0.0213142	0.0295064	0.0319665	-0.00571315	0.0230981	0.0235993	0.0119236	-0.00385672	0
48.6	-0.00601787	-0.00442887	0.00401882	-0.0069455	-0.0295387	-0.0143404	0.00448161	0.00993861	0.0271562	0.0359496	0
48.8	0.012717	0.0044745	-0.0255423	-0.0395942	-0.0431263	0.0145793	0.0146057	0.00292987	0.0191757	-0.00361469	0
49	-0.0056695	0.011919	-0.0109544	-0.00375398	0.00768796	-0.0424842	-0.00635462	0.00390098	-0.0298566	-0.0379228	0
49.2	0.00205942	0.0139506	0.019178	0.0286157	0.0297452	0.0388976	0.0610643	-0.0161627	0.0193355	0.027547	0
49.4	-0.0143534	0.00797749	0.0232744	0.0148907	0.00993429	0.0368057	0.0276469	0.00226798	0.0235761	0.010191	0
49.6	0.00180026	0.0325127	0.0498656	0.00410789	0.0266905	0.0129168	-0.0377395	-0.00246195	0.0175915	-0.0132905	0
49.8	-0.0034799	0.0321431	0.0198182	-0.0100177	-0.0435089	0.0060775	-0.0486847	-0.000141619	-0.00930216	0.00221165	0
50	0.0058249	-0.000306373	-0.024961	-0.00627835	-0.0775784	-0.0118163	-0.0312579	-0.0222291	-0.0282983	0.0184821	0
50.2	0.0311041	-0.0115656	0.001009	0.0124216	0.0342546	-0.015653	-0.0206736	-0.0660685	-0.00479065	-0.000101937	0
50.4	-0.0623972	-0.0105824	-0.00751837	-0.0121347	0.0200058	0.0017173	-0.00998147	-0.00629045	-0.0152569	-0.0361283	0
50.6	-0.066382	0.00139826	-0.0354044	0.0104601	-0.0153899	-0.0282262	-0.0167765	0.0172702	-0.0211779	0.00163175	0
50.8	0.0053776	0.00619173	-0.0066193	-0.0167988	0.00299712	-0.0169915	-0.0274674	0.00936094	0.0257352	-0.00546674	0
51	0.0291834	-0.0314405	0.0294349	0.0071492	-0.00838828	0.0151446	-0.00154801	-0.0208605	-0.00620691	-0.00379376	0
51.2	0.0374866	0.0125342	-0.00537178	0.0269019	-0.0165064	0.0209622	-0.0060129	-0.00338212	-0.0260017	-0.000563813	0
51.4	0.0316613	0.0503927	-0.0485604	-0.0120881	0.0264992	-0.00237841	-0.0118924	0.0264762	0.0285889	-0.0131243	0
51.6	-0.0212924	-0.0425744	-0.0163331	-0.0147656	0.0390405	-0.0249115	0.0241912	-0.00644802	0.0243395	0.0207541	0
51.8	0.000540077	-0.00297048	0.00144161	0.00305222	-0.0123741	-0.0116274	-0.0339532	0.0188437	-0.00958433	0.0606381	0
52	0.013991	-0.0118568	-0.0216227	0.0120561	-0.0109441	0.0050203	-0.00211479	0.0692027	0.0254226	0.00461968	0
52.2	0.00637522	-0.0315132	-0.0220791	-0.00414918	0.0209648	-0.0162901	0.0333385	0.0108442	0.0381865	-0.0182004	0
52.4	0.0234767	-0.0195463	-0.0113515	-0.0188957	0.0018896	-0.0115206	0.0183313	-0.0259947	0.00616685	0.0184472	0
52.6	0.00564798	-0.0072736	-0.00224466	-0.0167478	0.00178647	0.0139881	-0.0170229	-0.0120868	-0.0293483	0.0263693	0
52.8	-0.034311	-0.0125787	0.0146947	-0.00419723	0.0376599	0.0224595	-0.019344	-0.0073319	-0.0353877	-0.016324	0
53	0.00253691	-0.00686575	0.0310254	0.00775519	-0.00262937	0.0317777	0.0197564	0.0118572	-0.0176223	-0.0296998	0
53.2	-0.0010644	0.0257599	0.0394325	-0.00209551	-0.0291669	0.00916879	0.0133666	-0.0259468	-0.0248354	0.0072291	0
53.4	0.022521	0.0354032	0.00263473	-0.0132757	-0.0228897	0.00531859	-0.000552449	-0.0199394	-0.0184988	-0.0148426	0
53.6	-0.0016657	0.00104012	0.0135581	0.005555	-0.0120512	0.035731	0.00258619	-0.00608584	-0.0171814	-0.00894893	0
53.8	-0.00511326	-0.0348839	0.013445	0.0180305	0.020447	0.00386453	0.00452181	-0.00580919	-0.00719046	-0.00847269	0
54	0.0146608	-0.0284644	-0.0173365	0.0170868	0.0361397	-0.0180514	0.00393325	-0.01135	0.00660941	-0.0435951	0
54.2	-0.0165255	-0.00142879	-0.00950939	0.0143938	-0.0113938	0.0396938	0.00403979	-0.0206925	0.022463	-0.0387257	0
54.4	-0.0239281	0.0124663	0.0111768	-0.012038	-0.045285	0.000278519	0.000330977	-0.00227901	0.0570014	0.0051428	0
54.6	-0.0251386	0.0518986	0.0441026	-0.000829028	-0.0207084	-0.0490504	0.0470954	0.0465927	0.0106761	0.0130792	0
54.8	-0.0158374	0.0122633	-0.00165487	-0.00823349	-0.00738073	0.0287111	0.082216	0.0157375	0.0309698	-0.000916741	0
55	0.0143755	0.0354068	-0.0285149	-0.0180345	0.0332911	0.0217993	0.0302279	0.0184314	0.0668488	0.0416307	0
55.2	0.0383905	0.0488025	-0.0119672	0.00105853	0.0199512	0.000952186	-0.0426486	0.0155305	0.0257752	0.0490208	0
55.4	0.0110135	-0.0250103	-0.0148479	0.00222081	-0.0348808	0.0216237	-0.0564895	-0.00407832	-0.0148118	-0.00928112	0
55.6	-0.0424183	-0.0301685	-0.0192687	-0.0150801	0.00170425	-0.037282	-0.0423913	0.0382041	0.00866928	-0.0121402	0
55.8	-0.0301972	0.0211047	0.00716548	0.0407639	0.0273951	-0.00228965	-0.0321583	-0.00528616	-0.0254864	-0.00287999	0
56	0.00307783	-0.0139519	-0.00844347	0.00885229	0.0257805	-0.00780818	0.00187585	-0.0265569	-0.0534128	-0.0372837	0
56.2	0.00820383	-0.0757057	-0.00397437	-0.0361227	-0.0412893	-0.0399755	0.0152909	-0.0247726	-0.0353943	0.0250106	0
56.4	-0.00669348	-0.0387271	-0.0119403	-0.0151896	-0.0314953	-0.0226345	-0.0135061	-0.0359517	-0.0118112	0.049089	0
56.6	-0.0199534	0.000747251	-0.0244606	-0.0106885	-0.000279329	-0.00398241	-0.0514508	-0.045878	-0.0316133	0.00455244	0
56.8	-0.0170833	-0.0227608	0.00148798	-0.0264378	-0.017671	-0.0138028	-0.019153	-0.0241045	-0.0509018	-0.0169638	0
57	0.00314954	0.000214513	0.000856856	0.0283666	0.0178574	-0.0044516	0.0498322	-0.00746994	-0.0214754	-0.043106	0
57.2	0.00496913	-0.0317452	-0.0521859	0.00698513	-0.0534505	-0.0571173	-0.0364063	-0.0459338	-0.0309725	-0.00189354	0
57.4	-0.0093948	-0.0244134	-0.00840648	0.0063719	-0.0198962	-0.0532639	0.0155649	0.0287677	0.0356657	0.0266355	0
57.6	0.0380593	-0.00118976	0.0229286	0.0170304	0.00773299	-0.0453117	0.0171425	0.0161527	0.0324986	-0.000731963	0
57.8	0.0174823	-0.0045527	-0.0113953	0.0143926	-0.0277577	-0.019914	-0.0212495	0.0331874	0.0322259	-0.0150673	0
58	-0.0465813	-0.0237678	-0.0357351	0.00623045	-0.0280663	0.00670526	-0.000993381	0.061956	0.0323663	-0.000874391	0
58.2	0.00312361	-0.0550803	-0.0121048	0.0187914	-0.0143166	-0.0236013	0.00368976	-0.0230546	-0.0163355	0.00173532	0
58.4	0.0383504	-0.0993549	0.00828283	0.0446758	-0.0732838	-0.0424924	-0.00854726	0.0258358	0.0635791	0.0092792	0
58.6	-0.00669887	-0.0758866	-0.0188021	-0.0271601	-0.0158645	-0.0495898	-0.0327296	-0.0207911	0.0158333	-0.0120075	0
58.8	-0.074851	0.00343916	-0.000724281	0.0123862	0.0115265	-0.0304717	-0.096226	-0.0357418	-0.00300854	0.0132691	0
59	-0.0425418	0.020877	0.0280515	0.0305843	-0.020862	-0.0323263	-0.0520567	-0.00279579	0.00589817	0.0223139	0
59.2	0.00864613	0.000821271	0.00959727	0.0266166	-0.0378196	-0.0243032	-0.0015707	-0.0223172	0.0235218	0.0170269	0
59.4	-0.0100501	-0.00519072	-0.0186955	0.038874	-0.0126879	0.00187892	-0.0489551	-0.039745	0.0335646	0.00938005	0
59.6	-0.0296343	-0.0373959	-0.0193965	-0.0166785	0.00880933	-0.0293379	-0.0449057	0.0206208	0.00123081	-0.0251336	0
59.8	-0.0431924	-0.0461538	-0.0282043	-9.23192e-05	-0.0164118	-0.0775663	0.0136689	0.00759971	0.0239753	0.006373	0
60	0.0112939	0.0117078	0.0328792	0.00490232	-0.00477284	-0.0483084	0.0649736	0.0327218	0.0310155	0.0244038	1
60.2	0.123357	0.0648328	0.131582	0.0935771	0.0541453	0.0770781	0.116883	0.125105	0.108875	0.0487371	1
60.4	0.200141	0.146332	0.16899	0.153951	0.0743962	0.141808	0.135424	0.136517	0.121547	0.0465416	1
60.6	0.194158	0.190744	0.176281	0.148266	0.0450804	0.138317	0.139048	0.138751	0.0834891	0.0722606	1
60.8	0.151601	0.16044	0.184118	0.153941	0.0566384	0.124104	0.178045	0.175862	0.111184	0.10306	1
61	0.134735	0.177336	0.123232	0.128039	0.106858	0.0680398	0.194337	0.0800779	0.110499	0.0261451	1
61.2	0.140182	0.136242	0.0970801	0.107414	0.0657402	0.117157	0.130167	0.0923179	0.114386	0.0711469	1
61.4	0.0965839	0.120724	0.112429	0.109717	0.0897535	0.0558399	0.150406	0.136458	0.0760045	-0.0189991	1
61.6	0.0539624	0.190081	0.110743	0.0951743	0.101395	0.0402456	0.108759	0.0833977	0.0531508	-0.00196343	1
61.8	0.0816856	0.145295	0.102664	0.0832701	0.082391	0.0474503	0.0644845	0.0196895	0.0358468	0.0241927	1
62	0.0916001	0.0444972	0.0822186	0.0765042	0.0560043	0.0234602	0.0812931	0.0317466	0.0091938	-0.0345078	1
62.2	0.01542	0.0896302	0.0544121	0.0632929	0.0444676	0.0386664	0.057271	0.0582023	0.0218811	-0.0114122	1
62.4	-5.08883e-05	0.0765545	0.0973782	0.082586	0.112512	0.0129261	0.0529413	0.054384	0.0550573	-0.0294482	1
62.6	0.0249393	0.0668731	0.0947524	0.0512765	0.0618014	0.0286712	0.071924	0.0315908	0.0334566	-0.0453072	1
62.8	0.0283475	0.0355768	0.0730508	0.0594759	0.0614538	0.0428979	0.0308142	0.0255543	-0.0265687	-0.015171	1
63	0.025194	0.00423396	0.0388122	0.0876813	0.0204442	0.0206204	0.0327254	0.0452505	0.00756615	-0.00579444	0
63.2	0.00869112	0.0133496	0.0515456	0.0713563	-0.0173828	-0.00731596	0.0486085	0.0322783	0.0446885	-0.023071	0
63.4	0.00378192	0.0622941	0.0890456	0.0282718	0.0480342	0.00699278	0.0373736	0.0245721	0.0177987	-0.0288208	0
63.6	0.0317335	0.0659229	0.0535822	0.0331907	0.0725836	0.0289362	0.0593271	0.0732648	0.0401105	-0.0263338	0
63.8	-0.0177376	-0.0469121	0.0414368	0.093587	0.0353952	-0.0252173	0.00201034	0.00861859	0.0142783	-0.00138254	0
64	0.0017271	0.0179256	-0.00714781	0.0568734	0.0508823	-0.00232231	0.0239355	-0.0136346	0.0031777	-0.00493065	0
64.2	0.00718464	0.0275386	0.0332379	0.0386641	0.0292979	-0.0127773	0.000623986	-0.0173383	0.0305157	-0.0450955	0
64.4	-0.0369679	0.0236808	0.0272658	0.0391625	-0.0216326	-0.0120389	-0.023765	0.00067946	0.0371544	-0.047955	0
64.6	-0.0302567	0.0450656	0.00192053	0.0316703	-0.0230802	0.00492798	0.0134552	0.0215593	0.0400533	-0.0141208	0
64.8	0.033359	0.00668257	0.0693485	0.0240929	0.0163258	-0.0212008	0.063607	0.0260992	0.0407286	-0.0151688	0
65	0.0276042	0.0124822	0.0515562	-0.0191393	0.0321317	0.00634094	0.0894228	0.0494108	-0.0215316	-0.036593	0
65.2	-0.0040416	0.00146888	0.0460826	-0.00760636	0.00895393	0.0411946	-0.000921776	-0.0217818	0.00507409	-0.0118427	0
65.4	0.00467054	0.0183615	0.03736	-0.0142986	-0.00702654	-0.0181329	0.0330626	-0.0499652	0.00545464	0.022545	0
65.6	-0.0103274	0.0413994	0.00123631	0.00235719	0.00423523	-0.0310922	0.0202643	-0.0253325	-0.00078216	-0.00217746	0
65.8	-0.0377182	0.0288732	-0.0183856	0.00504572	-0.00800972	0.00841157	-0.0193711	0.0114558	-0.0201751	-0.0411463	0
66	-0.00548844	0.0142351	-0.00295069	-0.0186511	-0.0255849	0.00442852	-0.0258049	0.00349831	-0.0333456	-0.0334113	0
66.2	0.0246088	0.0222566	0.0215128	0.00531493	-0.00136505	-0.0188448	-0.0646323	-0.0331271	0.00146663	-0.000870526	0
66.4	-0.0463531	-0.00841826	0.0441179	0.0171244	-0.0155598	-0.00997261	-0.00939893	0.0275503	-0.00811395	0.0101983	0
66.6	-0.0149118	-0.0224113	0.000285374	-0.0357796	-0.0318164	0.00190118	-0.022526	0.00950387	0.00627039	-0.0395522	0
66.8	0.00531011	0.00969545	0.0088518	-0.0307602	0.00914353	-0.00880284	0.0383095	-0.0762338	0.00849659	-0.00502336	0
67	-0.00345708	0.0212058	-0.00920526	-0.0102054	-0.000765589	-0.00729677	0.0242931	-0.0246783	-0.0188546	-0.00674999	0
67.2	-0.0138404	-0.0102661	-0.0477253	-0.008877	-0.0458833	-0.00408578	-0.0468816	0.0610537	-0.0281859	-0.0678775	0
67.4	-0.0129506	-0.0259353	-0.0220105	0.011011	-0.00215724	0.000490675	-0.0320394	0.0167572	-0.0231817	-0.0437691	0
67.6	0.0242215	-0.0182232	0.004164	0.0264558	0.0624169	0.0403835	0.000828664	-0.0230485	-0.0354809	0.0245893	0
67.8	0.0238584	-0.046408	-0.000930258	0.010736	0.0010573	0.038385	0.0653363	-0.0242568	0.0026774	-0.0137005	0
68	-0.0116658	-0.0012427	-0.0168665	-0.00213627	0.0218143	0.0140845	0.00373111	-0.000985807	-0.0173257	-0.0125517	0
68.2	-0.0076051	-0.0060206	-0.025502	-0.00528412	0.0366595	0.00302444	0.0173684	-0.0210242	-0.0162809	0.028706	0
68.4	0.0121559	-0.0288467	-0.0320438	0.0118425	0.0318572	-0.00425131	0.0301151	-0.001772	0.0135803	0.0231004	0
68.6	0.00389588	-0.0173967	-0.00425281	0.013361	0.00475912	-0.021659	-0.0115471	0.0411827	0.0185359	0.0022539	0
68.8	-0.0201985	-0.0218471	0.0419918	-0.0198355	-0.0402764	-0.0381105	-0.0015024	0.0157099	0.011341	0.0210808	0
69	-0.0418527	-0.01617	0.0129509	-0.0278784	0.00401806	-0.0401068	-0.00385756	0.00280393	0.0195928	0.011547	0
69.2	-0.0306311	0.0116608	-0.00498072	-0.0390016	-0.0128098	-0.025431	0.0407612	-0.00453539	0.0286944	-0.014296	0
69.4	-0.00381113	0.0418008	0.00427909	-0.00944567	0.00295487	-0.0104126	0.0162913	0.00870278	0.0359594	-0.0228234	0
69.6	0.00702143	0.0226539	0.00324654	-0.00650553	-0.0169868	0.021955	-0.0164399	0.0343744	0.010482	-0.0174409	0
69.8	0.0103594	-0.0172351	-0.00272344	-0.00561206	-0.0655209	0.0355502	-0.0407075	0.00751598	0.0118548	-0.0137504	0
70	0.00754236	-0.00836139	0.00941692	0.0105352	-0.0536957	0.0205066	-0.0549845	-0.0161953	0.0111759	0.00658221	0
70.2	-0.0131247	0.0345878	0.0213948	-0.0164507	-0.0159208	0.0146852	-0.00525536	0.0326644	-0.0442171	0.0334825	0
70.4	-0.0112807	0.0297422	0.0135204	-0.00852514	-0.0118356	-0.00608258	0.0175992	-0.00843545	-0.000413171	0.0160887	0
70.6	0.0197265	-0.00858328	0.0201675	0.0516133	0.0422242	0.00567711	-0.0471837	-0.0580151	-0.0322373	0.0730883	0
70.8	0.0350177	0.00085153	-0.00511997	0.000952757	0.0496915	0.0130376	0.0141344	-0.0497468	0.00216836	0.00652586	0
71	0.017918	0.0101982	-0.0524197	0.0196924	0.0475303	0.0168294	0.0262494	-0.00855949	0.0136487	-0.0213785	0
71.2	0.0278714	0.0172241	-0.0201398	0.0442955	0.0235984	0.00846182	0.00485122	0.0333853	-0.0134622	0.0264872	0
71.4	0.0442503	0.0401423	0.0375307	-0.0365973	-0.0335688	-0.00237153	0.0603726	0.0123207	0.024633	0.0122088	0
71.6	-0.00755594	0.0059553	-0.023458	0.00432381	-0.00543056	0.0102392	0.00858307	-0.0522576	0.037192	0.00561794	0
71.8	0.0073028	-0.0385409	-0.0120574	0.00824656	0.0354962	-0.0376624	-0.00880644	0.0566654	-0.0247887	-0.0248057	0
72	-0.00204914	0.00592611	0.0112393	-0.0139898	0.0169833	-0.0373645	0.00694142	-0.00906189	-0.0453948	-0.0358275	0
72.2	0.00320214	0.00391881	0.0133863	-0.0129855	-0.00687185	-0.00171273	0.030437	-0.0364827	-0.0207991	-0.0226682	0
72.4	0.0137811	-0.0159725	0.001894	0.0157527	0.00840694	0.0156952	0.0172286	0.0669335	0.0149014	0.0169036	0
72.6	-0.0117143	-0.00370166	-0.00168462	0.0362133	0.0302578	-0.0033249	-0.0504418	0.0841112	0.00783445	0.0143823	0
72.8	-0.0262951	-0.0144843	0.0128012	0.0172967	-0.00201379	-0.0317276	-0.0505465	-0.00072495	-0.0363008	-0.028258	0
73	0.002666	-0.0104388	0.00982643	-0.0216374	-0.0511824	-0.00979853	0.070381	0.0156726	-0.00473739	0.0247457	0
73.2	-0.0178395	0.00491268	-0.0205224	-0.0287236	0.0406545	0.0447388	-0.0419314	-0.0194408	0.0506073	0.00412275	0
73.4	-0.0127063	0.00581307	-0.00735897	0.0060968	0.0309079	0.0259154	0.00370912	0.0071924	0.0455518	0.00465054	0
73.6	-0.0329055	-0.00596244	0.0175187	0.0299484	-0.00899962	0.0141587	0.0242749	-0.00738809	-0.035333	0.0350421	0
73.8	-0.00944406	-0.0171129	0.0158091	0.00745599	-0.00427091	0.00831901	-0.017045	-0.0489379	-0.046753	0.0162568	0
74	0.0671343	0.0101808	0.0153136	-0.0108668	-0.000742949	-0.00295536	0.0231397	-0.018508	0.014608	-0.0205576	0
74.2	0.0458591	0.0533945	0.00930709	0.0127932	0.00126447	0.0307295	0.00539891	0.0121937	0.00453434	-0.000861659	0
74.4	0.00921204	-0.00860833	-0.0493702	-0.00113695	-0.0188495	-0.00151193	-0.0480202	0.00423414	0.0193164	-0.00437118	0
74.6	-0.0175886	-0.027002	-0.00797694	-0.0159554	0.000588063	-0.0211102	-0.00706202	0.00390478	-0.0188376	-0.0278375	0
74.8	-0.0101557	0.0128488	0.00502439	-0.00688726	0.040634	-0.0171395	-0.022995	0.017084	0.0195041	0.0140244	0
75	1.64146e-05	0.0108676	-0.0269247	-0.000886369	0.00833935	-0.00131856	-0.0327147	0.00870545	0.0351398	0.0285204	0
75.2	-0.0045294	-0.00167446	-0.0211979	-0.0176463	-0.0505564	0.00148227	0.0200215	-0.0302614	0.00400337	0.00042562	0
75.4	-0.00885483	0.0204017	0.00952647	-0.0290335	-0.0590047	-0.0173094	0.0216112	-0.0198271	0.01816	-0.00487821	0
75.6	0.000983178	0.00195764	0.0140841	-0.0104752	-0.0500552	-0.0104969	-0.015893	0.0584445	0.00367436	-0.0216881	0
75.8	0.0445202	0.0150571	0.0270658	-0.00115842	0.0346004	0.0308307	0.0497198	-0.0070707	-0.0211287	0.00514012	0
76	-0.0108742	0.00622663	0.0128593	0.0138769	0.0188923	0.0167458	0.0419291	-0.0437083	-0.0225957	-0.0188772	0
76.2	-0.00940086	-0.00843031	-0.0166295	0.0215816	-0.0224864	0.0209065	0.0380415	0.0013339	0.0251982	-0.00448322	0
76.4	0.0295787	-0.0146682	-0.0120683	0.012679	-0.0250774	0.0219673	0.0134651	0.00884569	0.0269136	0.00810274	0
76.6	-0.00542153	0.0143478	0.023781	0.0126691	0.00840344	-0.00312393	-0.00483815	0.00132415	-0.0133701	-0.00223103	0
76.8	-0.0357145	0.0509996	0.0374664	0.0242036	0.0434822	0.000974614	0.0394889	0.0337238	-0.0123619	0.0292893	0
77	0.00393569	-0.00967061	0.0179285	0.0045365	-0.00370144	-0.00811268	-0.0367674	-0.0225182	-0.0394276	0.00277324	0
77.2	-0.00814482	-0.00722092	0.00581005	-0.00724232	-0.00606566	-0.0319669	-0.0226284	0.00894719	-0.0103007	-0.0342391	0
77.4	-0.0212037	-0.0260426	-0.0025048	0.0142944	0.00413456	-0.0156513	-0.0209687	0.0156462	0.0165606	0.0560645	0
77.6	-0.00162907	-0.0125646	-0.0202422	-0.00827024	0.0267986	0.0359065	-0.0248668	-0.00470526	0.0437451	0.0651111	0
77.8	0.0168799	0.00238964	0.000950093	-0.0321659	0.0609088	0.0399517	1.35868e-05	-0.00976811	0.015445	-0.00324737	0
78	0.013573	-0.0194122	0.0175071	0.0112949	0.0468742	-0.0170702	-0.00687021	-0.00258699	-0.0512901	0.00373147	0
78.2	0.00291942	0.00141132	-0.0366059	0.0308927	-0.0226945	-0.0338978	-0.0341406	0.0120475	-0.0182783	0.00282224	0
78.4	-0.0149886	-0.025121	0.00960546	-0.016382	-0.0396794	0.00597976	0.0193919	-0.00424999	0.0224226	-0.017468	0
78.6	-0.0330067	-0.0357487	0.0144923	3.09651e-05	-0.0132914	-0.0152567	-0.00535308	-0.0234303	-0.00834456	0.0175333	0
78.8	0.0136221	0.00607522	-0.00957994	-0.0197973	-0.000830078	-0.0229967	0.0188389	0.000344476	-0.00409525	-0.00864415	0
79	0.0274731	0.0425506	0.00140139	-0.00239841	-0.0226792	0.0293441	0.0370337	0.0231956	-0.00605397	-0.0369366	0
79.2	0.00152684	0.0193171	0.00575651	0.0360205	-0.0331873	0.0282931	0.010997	0.0104596	-0.0132985	-0.0185381	0
79.4	0.0122517	-0.0356528	-0.0100328	-0.00695355	-0.00866672	-0.0294095	0.0150603	-0.00788873	0.0260386	-0.0162971	0
79.6	-0.00779132	-0.0461207	0.0142351	-0.0194891	0.00474205	0.00939848	-0.00404654	-0.00431599	0.0151459	-0.0151571	0
79.8	-0.0199581	0.00966966	-0.0271639	-0.0232421	0.013309	-0.00917946	-0.011754	0.0208311	-0.0167511	-0.0282895	0
80	-0.00349284	0.0258282	0.00184134	0.0138838	0.00513175	0.00299165	0.0204112	-0.017304	-0.0159559	-0.0349504	0
80.2	0.0246515	0.0105327	0.0154107	0.00849687	-0.0182228	0.00937277	-0.0379168	-0.0356381	-0.019537	-0.0206288	0
80.4	0.0314095	-0.00678739	-0.0073687	-0.00790934	-0.0120212	-0.0355774	-0.0730224	-0.0340289	-0.036124	0.0308754	0
80.6	0.00744463	-0.0165855	-0.0249316	0.00806246	-7.50915e-05	-0.0567722	-0.0113871	-0.00586735	-0.00647393	0.0598989	0
80.8	-0.0138512	-0.0196788	-0.0386174	-0.00783959	-0.00420949	-0.00869646	-0.00381182	0.06727	0.0473133	0.0272121	0
81	0.00102491	-0.0206839	0.00687023	-0.0267748	0.0602777	0.0164704	-0.00294552	0.0309734	0.0132838	0.0385243	0
81.2	0.0168677	0.0691967	0.0102807	0.0190058	0.0252538	0.0199002	0.0519725	0.0001018	0.0158521	0.0124296	0
81.4	-0.00257223	0.072517	-0.00269844	-0.00907057	-0.0643186	-0.00583162	0.0358407	-0.0129064	0.00559397	-0.00716539	0
81.6	-0.00555202	0.0219431	0.0413123	0.00793796	-0.0221861	0.00213752	0.0346104	-0.0434722	0.000813491	-0.0336657	0
81.8	0.0155388	-0.00558456	0.0462465	0.0539014	0.0404964	0.0211106	0.0421092	-0.02504	0.00533341	-0.0300933	0
82	0.0292056	-0.018013	-0.0212424	0.00883298	0.0054163	0.00664334	-0.0175718	0.0286556	-0.0154987	0.000772368	0
82.2	0.0283501	-0.0110175	-0.0118858	-0.0191734	0.0297512	0.0042447	-0.0352898	-0.00306192	-0.0154528	-0.0208855	0
82.4	-0.0259688	-0.0214454	0.00630722	0.00492071	0.045436	-0.010032	0.0179308	-0.0139987	0.0353074	0.0188028	0
82.6	-0.0422571	-0.021598	0.00872477	0.00921982	0.0381369	-0.00877626	0.0310353	-0.0244016	0.00595555	0.0269205	0
82.8	-0.00665418	0.00342999	-0.00129714	0.0304996	0.0193051	0.000302731	-0.00965372	0.0528834	0.0140831	0.0258588	0
83	0.00371167	-0.00229744	-0.00749006	0.0340662	0.0073738	0.0270961	-0.0132838	0.0361169	0.00785792	0.0278158	0
83.2	-0.00387107	-0.0125242	0.00917076	-0.0097874	0.009243	0.0378366	-0.0242553	-0.0430585	-0.0193534	-0.00251863	0
83.4	0.0236319	0.0359188	0.0297115	-0.0347718	0.0122623	0.0166555	-0.0714733	0.0092923	0.0164077	-0.0202272	0
83.6	0.0288534	0.0629324	0.00722094	-0.00844124	-0.00567185	0.0298409	0.000495489	0.0190277	0.00217473	0.0256478	0
83.8	-0.00727339	0.0161765	-0.020882	0.00684346	-0.0464508	0.00638632	0.036722	0.0413951	-0.0188119	-0.0269716	0
84	-0.0330489	-0.0435887	0.00891461	-0.000353473	-0.0174666	0.002325	0.00183463	0.00937178	0.0148032	-0.00657165	0
84.2	-0.0185274	-0.0526631	0.017135	0.00222853	-0.0599719	-0.000397137	-0.0132038	-0.0510691	0.00535231	-0.00874431	0
84.4	0.0131582	-0.068142	-0.0300639	-0.00992364	-0.0587157	-0.00561577	-0.0141157	-0.0110435	-0.0193668	-0.0306479	0
84.6	0.0224497	-0.028609	-0.0281224	-0.016798	0.0166146	0.00986519	-0.00647042	0.0406914	-0.00125372	-0.0171598	0
84.8	0.000758253	0.093817	0.0420572	0.0118368	-0.029318	0.00728579	0.0205759	-0.0476188	-0.0120074	-0.029269	0
85	-0.0267923	-0.00851071	0.0141043	-0.025597	0.00114022	-0.0478916	-0.0318262	-0.0495869	-0.0350242	0.00474754	0
85.2	-0.041072	-0.0372863	-0.0143792	-0.00914435	0.0305424	-0.0478405	0.0167006	0.00408539	0.0141044	0.0118719	0
85.4	-0.0027973	0.00951514	-0.0229837	-0.001252	0.0187486	-0.00384069	0.0408944	-0.021042	0.00353638	0.00310583	0
85.6	0.0351352	0.0103869	-0.0145404	0.0236424	0.0184538	-0.0109351	-0.0261012	0.0116216	-0.0133222	-0.00492246	0
85.8	0.0204972	-0.00417608	-0.00124464	0.0428974	0.0139827	-0.00348687	-0.0579198	0.0573674	-0.000303883	0.0129138	0
86	-0.0133372	0.0301617	-0.0101172	-0.00184429	-0.00963396	0.0208255	-0.00966562	-0.00806082	0.0094796	0.0321655	0
86.2	-0.0154314	0.0455463	-0.0203198	-0.0289826	0.0124523	-0.0533223	0.0179353	-0.00190065	0.0426284	0.00816412	0
86.4	0.000465322	-0.000467967	0.0193536	-0.0072969	0.020031	0.019407	0.0582279	0.0759452	0.00822337	0.0411133	0
86.6	0.00533424	-0.0183253	-0.00585267	-0.00378804	-0.020192	0.0274526	0.00216085	-0.0103779	0.00302797	0.00262437	0
86.8	-0.0138483	-0.00582349	0.000231031	0.0153223	-0.0215615	0.00681681	-0.00136402	-0.0470033	-0.028721	-0.0109276	0
87	-0.0364016	-0.0195167	0.019214	0.000637404	0.0213913	-0.0226176	0.0427814	0.0176344	-0.029829	0.0154857	0
87.2	-0.0234202	-0.0236874	0.0035554	-0.0328381	-0.00268069	-0.0546683	-0.00237646	0.00618622	-8.39028e-05	0.00111415	0
87.4	0.00533802	0.0166453	0.0103112	-0.0167195	-0.0669281	-0.0234704	-0.0754543	-0.0606505	-0.0247795	-0.0349363	0
87.6	-0.00610325	0.00661216	0.0144199	-0.028834	-0.00325402	0.0174436	-0.0225422	-0.0150705	-0.00913277	-0.0365491	0
87.8	0.0215262	-0.0139841	-0.0321563	-0.00274105	0.000727351	0.0115244	0.00357245	0.0054533	0.0183774	-0.0414544	0
88	-0.00774204	-0.0371891	-0.0253951	0.0103619	-0.0114855	0.00384631	0.000439372	0.00424481	0.0299192	-0.00115635	0
88.2	0.0120863	-0.0264438	0.00476495	-0.0153894	0.00725767	0.00495487	0.0095288	-0.00440584	0.035143	0.0361293	0
88.4	0.0314438	0.0246408	-0.031398	0.00691035	0.0249128	0.00632133	0.00865194	0.0151122	0.0101353	-0.00229627	0
88.6	-4.49173e-06	0.0360536	-0.0517047	0.0528102	0.0307456	0.00630605	0.012411	0.0191665	-0.0204185	-0.0214927	0
88.8	0.0336245	-0.0157575	0.014954	-0.00511755	0.0358164	-0.00473377	0.0250019	-0.0403394	0.000381062	0.0423412	0
89	0.0136777	0.00828881	-0.0252301	-0.0496972	0.0185689	-0.0151967	-0.0550793	-0.0131691	-0.00450275	-0.0157602	0
89.2	0.00391914	0.0403067	0.016371	0.00531374	0.0651869	0.0307596	0.00830005	-0.0483474	-0.0093026	0.0108751	0
89.4	-0.0118613	-0.00622155	0.034232	0.0411112	0.0100334	0.0258615	0.0234416	-0.0108961	-0.0137265	0.0126539	0
89.6	0.00717818	-0.017901	0.0356663	0.0184588	-0.0543525	-0.0102584	-0.00585827	0.0612308	0.017883	-0.0261982	0
89.8	0.0412472	0.0246636	0.0338337	0.00616058	-0.0243682	-0.0115031	-0.00120068	0.0496811	0.0290734	-0.019866	0
90	0.00561498	0.0234978	-0.0081938	0.00350197	-0.0215028	0.00533845	0.029469	0.00642787	-0.024937	0.00957229	0
90.2	-0.0492393	0.0060359	-0.0142857	-0.0290258	-0.0686841	0.00921774	0.0821035	0.00633229	-0.0346287	0.00406772	0
90.4	-0.0113467	-0.0163546	-0.012595	0.0147101	0.0102702	-0.0106321	-0.0140004	-0.0189654	-0.014144	0.00823973	0
90.6	0.0182902	-0.0311774	-0.0302917	0.00552599	0.0106549	-0.0187552	-0.0365244	-0.0216921	0.0108523	0.028147	0
90.8	-0.00168317	0.0216368	-0.00145809	0.00801815	-0.0236015	0.00273581	-0.02918	0.0305082	0.0131818	0.0190729	0
91	-0.0223755	0.000208332	0.0453842	0.0121606	0.00693667	-0.0123207	-0.027195	0.0225115	-0.0016104	0.0201598	0
91.2	-0.0256513	-0.0550071	0.0340968	-0.0195238	0.0256822	-0.0236221	0.00824821	-0.0121512	-0.0188495	0.0407696	0
91.4	-0.0289406	0.00823731	-0.0045161	-0.0316345	-0.0125292	0.0382284	0.025517	0.0202168	-0.0169187	0.0177526	0
91.6	-0.0091114	-0.0363598	-0.00446449	-0.0244394	0.00317775	0.024141	-0.0063073	-0.0291791	0.0211021	-0.0223747	0
91.8	0.0153525	-0.043553	-0.0274494	0.0259465	-0.0343587	-0.0309679	0.012256	0.0239506	0.00254992	-0.0347817	0
92	-0.0085636	0.0376248	-0.0222644	0.023453	0.0230728	0.00456208	0.000690227	0.00643524	0.0154229	-0.00701504	0
92.2	-0.00898948	0.0355319	-0.00642722	0.0280794	0.0149811	0.0102694	-0.0248466	-0.0441926	0.00231539	0.00819477	0
92.4	0.0292472	-0.0101195	-0.0117023	0.029686	-0.0416653	-0.00868929	-0.0186023	-0.0421403	-0.0118123	-0.0288584	0
92.6	0.0313352	0.0150995	-0.0207484	-0.0136846	-0.00318913	0.0218051	0.00766963	-0.0228233	0.0081866	-0.0569043	0
92.8	0.00268465	0.00571563	-0.0225654	-0.0314128	0.0150659	0.00126887	0.0051208	-0.000632232	-0.0139875	-0.00909273	0
93	0.00904696	-0.0476216	-0.0201934	-0.0507788	0.0017178	-0.0365888	-0.0615899	0.022095	0.0183915	0.0180647	0
93.2	-0.0215473	-0.055003	0.0251107	-0.0459732	0.0067047	-0.00948221	0.00401149	0.00276609	0.0171882	-0.00927946	0
93.4	0.00318157	-0.00716071	0.0135281	-0.0222665	0.026216	-0.0159812	0.0681902	0.0150601	0.00178228	0.0228005	0
93.6	0.0147323	0.0357589	0.00537129	-0.0259809	0.0318233	-0.00704365	0.0078436	0.023202	-0.0107182	0.00360452	0
93.8	-0.00852767	0.0247876	0.0221212	-0.0181313	-0.00413466	0.0144177	-0.0342453	0.00563813	-0.0281901	-0.0405808	0
94	0.0104993	-0.00245677	-0.00624857	0.0228416	-0.0397413	-0.011063	0.0107129	0.00672453	-0.0275222	0.0197109	0
94.2	-0.00100231	0.0199142	-0.00507292	0.00691818	-0.016594	0.0123504	-0.0267873	0.000167302	0.0160889	0.0314853	0
94.4	-0.0421819	0.0163604	0.0441938	0.0179896	-0.0545052	0.00937744	-0.0217083	0.000678083	0.0594204	0.0168725	0
94.6	-0.0586728	-0.0100558	0.009153	0.0302873	-0.0197737	0.00126787	-0.0490217	0.00914855	0.00191123	0.00432925	0
94.8	0.00125098	0.00150975	-0.0115624	0.0268657	0.00828091	0.0120888	-0.0278194	0.0196193	0.000243487	-0.0149917	0
95	0.0311931	0.0135256	0.0111467	0.011246	0.0239403	0.00810536	0.0349957	-0.00791101	0.0215148	-0.0347564	0
95.2	0.0107763	-0.0108928	-0.00563609	0.00431547	0.034471	-0.00330641	0.0552055	-0.0464079	-0.00330022	-0.0228995	0
95.4	0.0327126	-0.0177351	-0.0274243	0.0214366	-0.013011	0.00202322	0.0405854	-0.0104519	0.00691632	0.00715644	0
95.6	-0.00272298	0.00330734	0.0211726	0.0204005	0.00973493	-0.0251737	0.0109823	0.046584	-0.0145381	-0.00029601	0
95.8	-0.032317	0.0127434	-0.00209876	-0.0166042	0.0463793	0.009952	0.00568289	-0.00233865	-0.0107223	0.0267303	0
96	-0.0103671	0.0210955	-0.0194962	0.0164062	-0.00689794	0.00517307	-0.0105596	-0.0476135	-0.0278175	0.0126193	0
96.2	0.0111922	0.0343536	0.0207667	0.0235517	-0.0275278	0.0205288	-0.0184386	-0.00184537	-0.0518161	0.0171617	0
96.4	0.0101899	0.0162646	0.0135932	-0.0125027	0.0096199	0.0425223	-0.0131516	0.0165125	-0.0137585	0.0271837	0
96.6	0.0106221	-0.014685	-0.0384311	-0.0206294	0.0144227	0.0022024	-0.00272549	-0.0239602	0.0357241	0.00651816	0
96.8	0.0125999	-0.004577	0.00452726	-0.0197912	0.0115909	-0.0148345	0.0445411	0.00861352	-0.00385914	0.0180053	0
97	0.0146605	-0.0292471	0.0181092	0.0405112	-0.00133521	-0.0119166	0.0754908	-0.00555232	-0.0114174	-0.0404329	0
97.2	-0.0224326	-0.00902649	-0.0192335	-0.0263684	-0.000278692	0.0150369	-0.0364065	0.0344339	0.0181359	-0.0109279	0
97.4	0.00189411	0.0407116	-0.02055	-0.0142801	-0.0106873	-0.00993509	-0.0424271	-0.00741141	0.0129885	-0.0069972	0
97.6	0.0211617	-0.0037863	0.0110614	0.0112986	-0.00647761	-0.0118098	0.0341144	-0.00783958	0.00790457	-0.0301149	0
97.8	-0.0205389	-0.0374528	0.0203611	-0.0205469	0.0323476	0.00463584	0.00649529	0.0450647	0.0406051	-0.00644757	0
98	-0.0228069	0.0419156	-0.00364957	0.000552838	0.0288219	-0.0364963	-0.0444255	-0.00733657	0.0357208	0.0142828	0
98.2	0.0226572	0.0193274	-0.0336646	-0.0108022	-0.0447694	-0.0213068	0.00752113	-0.0166465	-0.0352434	-0.0021313	0
98.4	0.0189337	0.0433807	-0.0120911	0.00745232	0.0012873	0.00184041	-0.0428902	-0.0291531	-0.0163212	0.00365038	0
98.6	0.0259088	0.00728973	0.023613	0.0228012	0.027405	0.0216847	0.00326133	0.0162813	-0.0185254	0.018154	0
98.8	0.00557337	-0.019359	0.0447835	0.00672563	0.00324814	-0.0211989	0.0321491	0.00995584	-0.0121383	-0.00398202	0
99	-0.00897232	-0.0309908	0.0238748	-9.50191e-05	-0.0121695	-0.00960467	0.0166066	-0.0272512	-0.010705	-0.0150157	0
99.2	-0.00512253	-0.0689739	-0.0180573	-0.00751717	-0.00264108	0.0447123	0.0111235	-0.0199049	-0.0398497	0.0169174	0
99.4	-0.0419919	-0.0661105	-0.027371	-0.0298129	0.028158	-0.0199157	-0.0340312	-0.02206	-0.0202559	0.0297849	0
99.6	-0.0152283	-0.0295638	-0.0285631	0.0330699	0.0554898	-0.0042729	-0.0132648	-0.00618401	0.0143976	0.0184745	0
99.8	0.0195491	0.0345865	-0.00430065	0.0043884	-0.0215038	0.00288838	-0.0391508	0.0105387	-0.010022	0.0119668	0
100	-0.0234668	-0.00867185	-0.0145143	-0.024585	-0.0357144	0.0123507	0.0123089	-0.00522979	0.0129862	0.0150805	0
100.2	-0.0260763	-0.0455406	-0.00359702	-0.0495919	-0.00155762	0.0072156	0.0472538	-0.0219963	-0.00517293	-0.0109929	0
100.4	-0.00174283	-0.017591	0.00923783	-0.0418259	-0.0208595	0.0115381	-0.000807494	-0.0113049	-0.0286313	-0.0209883	0
100.6	-0.017862	-0.0149702	-0.0288958	0.0084271	-0.0421839	0.0349357	-0.0153221	0.00692565	0.0222903	0.00349471	0
100.8	0.0336272	-0.00515278	-0.0223044	-0.0138789	-0.000433305	0.00143804	0.00965714	0.0198775	0.002529	-0.02116	0
101	0.0407752	0.0405237	0.0197154	0.00620266	-0.000967616	-0.0101291	-0.0215997	0.0461607	0.0105135	-0.0154791	0
101.2	0.00164361	0.0544029	0.0190997	-0.0148348	0.0161029	-0.00659344	-0.02183	0.0550643	0.0329556	-0.035055	0
101.4	0.0057886	0.0213545	0.0227281	0.00565456	0.0310582	-0.0248152	-0.0105328	-0.00863341	0.0307929	-0.020766	0
101.6	0.0180711	0.0111227	0.0190973	0.030938	0.0125111	-0.0146439	0.0222808	-0.0380183	0.0267098	0.00930821	0
101.8	-0.0016131	0.0172888	-0.00274095	0.0192965	-0.0228008	0.0116877	0.0228298	0.00866072	0.0084309	0.00705976	0
102	-0.000596619	0.00243452	0.000180202	0.020053	-0.0467739	-0.021845	-0.0344742	0.0196072	-0.036045	0.00770868	0
102.2	0.0144461	0.0421312	0.00663909	-0.00488655	-0.0296433	-0.0376604	0.0171019	0.00274784	-0.0148096	0.0220619	0
102.4	-0.00311727	0.0573877	0.0246053	0.0327914	0.046815	0.0382508	0.0219839	0.0113407	0.0268302	0.0139528	0
102.6	0.00863232	-0.0178695	0.0240979	0.0316507	0.0414059	0.0212079	0.0237769	-0.0240542	-0.0023883	-0.00420399	0
102.8	0.000623712	-0.0522236	0.0109697	-0.00211004	0.0214931	0.00540764	0.0175872	-0.0631332	-0.019867	-0.00542347	0
103	-0.0191457	-0.025289	-0.0177491	0.0227192	0.01954	0.0153529	0.0103831	-0.0338388	-0.00554898	0.0102089	0
103.2	-0.00961233	-0.00351805	-0.0370147	0.0341741	-0.00885977	-0.00394625	0.0136574	0.0135079	-0.00185102	-0.0100811	0
103.4	-0.0129799	0.0146928	-0.00830935	-0.0559609	-0.0268738	0.0155333	-0.0196904	0.0152449	0.00888188	-0.0598792	0
103.6	-0.0178514	-0.0200853	-0.00266593	-0.0383523	-0.0275867	0.010135	-0.0532045	0.0398498	-0.00480629	-0.00631052	0
103.8	-0.0171993	0.00544815	-0.00589354	-0.016412	-0.0127421	-0.024917	-0.00734087	-0.0185301	0.00417714	0.0101106	0
104	0.00312408	0.00135079	-0.00260274	-0.00500356	0.017788	0.00679002	0.0328189	-0.0387872	0.0227702	-0.00934452	0
104.2	0.0134658	-0.0250919	-0.0154999	-0.0294582	-0.000389425	0.0207642	-0.0407159	0.023978	0.0127501	-0.0156621	0
104.4	0.0128013	-0.00910542	-0.0199655	-0.0272969	-0.0129727	-0.0138455	-0.0542966	0.0402318	0.0347959	0.00849646	0
104.6	0.0231038	0.0192053	0.00626806	0.0138221	0.0239593	-0.0222169	0.0518998	0.00232803	0.0518077	0.0281293	0
104.8	0.0145276	0.0171033	0.010759	-0.020365	-0.0119997	-0.0311337	0.000986276	0.027847	-0.0624068	0.00294253	0
105	-0.0180108	0.00985486	0.0170665	0.0520371	-0.0170905	-0.0100807	0.0294596	-0.0464032	-0.0235574	0.0139415	0
105.2	-0.0241003	-0.0230863	0.026211	-0.028184	-0.00296024	0.00426386	0.0542091	0.00771958	-0.0224095	0.00486586	0
105.4	0.0164467	-0.0197641	-0.00252743	0.0012601	-0.0407082	0.00762377	0.0143994	0.0220322	-0.0240822	0.0014818	0
105.6	0.0128389	-0.0094802	0.000330777	0.0438692	-0.00790709	0.0236091	-0.00484327	-0.0257266	-0.0117748	0.0114417	0
105.8	-0.0257835	-0.0129613	0.0590236	-0.0200565	0.0668295	0.0229085	-0.0145512	0.00280485	-0.0114173	0.0195889	0
106	0.00566924	0.000504331	0.0509201	0.0299952	0.00938997	-0.0184444	-0.0691437	0.0397632	0.00733359	0.0354366	0
106.2	0.0261927	-0.0106526	-0.0290493	0.0420121	-0.0144772	-0.020643	-0.0282492	-0.00339514	-0.00903526	0.02817	0
106.4	-0.0126582	0.0757728	0.00243402	0.0225981	0.0049451	0.0141704	0.0407335	-0.0282599	0.00260914	-0.0253904	0
106.6	-0.0193599	0.0392502	-0.0172466	-0.0153851	0.0297672	0.0393378	0.0288194	0.0104823	-0.0033624	-0.0182429	0
106.8	-0.020849	-0.0251984	-0.0229487	-0.00839094	-0.00763751	-0.00191641	-0.0252173	0.0236325	0.0147824	0.00285291	0
107	-0.0209926	-0.00310015	-0.000435611	-0.0188626	-0.0503455	-0.0391793	-0.0190591	0.00357362	0.0609487	-0.0136536	0
107.2	0.0149696	0.0191592	-0.0108956	-0.0548419	-0.00746952	-0.01996	0.0444153	0.0151852	0.0336461	-0.0179775	0
107.4	0.0231489	0.0106567	0.00919488	0.000929247	0.0342352	-0.0147537	0.0561077	0.0143967	-0.0516143	0.0139574	0
107.6	-0.0238199	0.0142385	-0.0203425	-0.00384324	-0.0367436	0.0122013	-0.00565157	-0.04858	-0.0104907	0.0289125	0
107.8	0.0168351	-0.0155345	-0.0302692	-0.00477898	-0.0359105	0.0131848	-0.00477673	0.000800139	-0.00617159	-0.0131463	0
108	0.0103688	-0.0206111	-0.0146723	0.0228219	-0.0225382	0.00125893	-0.00882786	-0.0101709	-0.00377796	-0.023726	0
108.2	-0.0145914	-0.013784	-0.0101598	0.0101499	-0.0208628	0.00566425	-0.0195919	-0.0340198	0.00814304	-0.0175185	0
108.4	0.0156505	-0.017918	0.00143214	-0.00494546	-0.00986498	0.00513457	0.0420176	0.00387887	-0.00183332	-0.00322857	0
108.6	0.0332271	-0.0260067	0.0212731	0.0291691	0.00281922	-0.0127169	0.081525	-0.00474978	-0.0169698	0.0309754	0
108.8	0.017461	-0.0417061	-0.00409379	0.019689	0.035456	-0.0019722	-0.0346804	-0.0316773	-0.0301587	0.00721651	0
109	-0.00910893	0.0372652	0.00352203	0.0313339	0.0283687	0.0171931	-0.0285241	0.00551294	-0.0235648	0.000245376	0
109.2	-0.0189281	0.0308978	-0.0376816	-0.0209875	0.0585694	-0.0123595	-0.0510657	0.0171747	0.00770462	-0.00198936	0
109.4	-0.0201034	-0.00288331	-0.0200263	-0.0500873	0.0405193	-0.0160192	-0.055441	-0.0070776	0.00799073	-0.0253367	0
109.6	-0.0177764	-0.00959804	0.00322727	-0.0102381	0.0172727	-0.021445	-0.0135509	-0.0570544	0.0125421	-0.0351079	0
109.8	-0.00982286	0.00857009	-0.0285013	0.00397877	0.0232071	-0.0325918	0.0122504	-0.0499237	0.0365319	-0.00968573	0
110	-0.00359088	0.0312566	-0.000225871	-0.0363082	-0.0419076	0.00965094	0.00316941	0.0416349	0.0127784	0.004268	0
110.2	0.00180717	-0.0497978	0.022489	-0.029372	-0.0672573	-0.0207009	-0.0612725	0.00334994	-0.0180394	-0.0148794	0
110.4	0.0156169	0.00138929	-0.00602838	-0.00577306	0.0247137	-0.0244592	-0.0395159	0.00305372	-0.0297613	-0.00754167	0
110.6	0.00762501	0.0206565	-0.0138986	-0.00850779	-0.00582755	-0.00468033	-0.0306827	0.0278038	0.0150764	-0.0160637	0
110.8	-0.0123805	0.0425789	0.0182674	0.0343403	-0.0388676	0.0149808	-0.0031497	0.00954585	0.00154272	0.00724091	0
111	0.00315692	0.0362383	0.0254257	0.0514779	-0.00542764	0.0241156	0.0272934	0.0136733	-0.0422559	0.0379101	0
111.2	0.0190129	-0.0429418	-0.00802595	-0.011303	-0.020934	0.0294254	0.00104882	0.057022	-0.0174197	0.0177282	0
111.4	-0.0302163	-0.0210743	-0.00532558	-0.00261958	-0.0206001	0.0461213	-0.00502441	0.0309225	0.00311517	0.000603247	0
111.6	-0.0221373	-0.0321287	0.0371143	0.00661636	0.0169754	0.0235793	-0.014337	0.00874139	0.0354475	-0.0380494	0
111.8	0.0108339	-0.0322497	0.0337689	0.00253616	-0.00608068	-0.0580083	0.0137848	-0.0367738	0.0204922	-0.0324173	0
112	0.0093462	-0.0103037	0.0114915	0.0265582	0.0429019	-0.0143752	0.0408039	-0.0365335	-0.0316279	0.020287	0
112.2	0.00716393	0.0247789	-0.0140361	-0.00186705	0.0284794	0.0543065	0.0385065	-0.0122148	-0.0329865	0.023745	0
112.4	0.0286012	0.0286768	-0.0100683	-0.0464446	-0.0464628	0.0208477	0.0209734	0.00283909	0.0136678	-0.00559835	0
112.6	0.0239069	-0.0292304	0.0248664	-0.00774416	-0.00200951	-0.00455564	0.011055	0.0125025	0.0364069	-0.00254053	0
112.8	-0.00552436	-0.060223	-0.00730721	-0.00914698	-0.0185066	0.00207993	0.0235605	-0.0192635	0.0421639	-0.020527	0
113	0.0292541	-0.0101265	-0.00481902	0.00138641	-0.00230196	-0.0438462	0.0284681	0.018063	-0.00569271	0.0552347	0
113.2	0.000876622	0.00811881	0.0181007	-0.0102949	0.0232205	-0.0410857	0.000645446	0.00304921	-0.0501808	-0.00750823	0
113.4	0.00214226	-0.0211264	-0.0034266	0.0247642	0.0131502	-0.0194879	-0.0415069	0.0208904	-0.0280459	-0.0368838	0
113.6	0.0230238	-0.0154054	-0.0136868	0.0290903	0.00055356	-0.00494204	-0.0540326	0.0411501	0.0179428	0.0267656	0
113.8	-0.00987173	0.020635	0.0155712	-0.0233219	0.0182467	0.0078616	-0.0280882	-0.0032021	0.0216994	0.0279765	0
114	-0.0335157	0.0223039	0.00222249	0.00907476	0.0138834	-0.00335498	0.00596743	-0.0155883	-0.00390563	-0.00238052	0
114.2	-0.0609622	0.0373671	-0.0168927	0.0243681	-0.0470599	0.00973074	0.0328226	-0.0250038	-0.0170543	0.0135823	0
114.4	-0.000904175	0.00689356	0.00147469	0.0359405	-0.0238135	0.0159778	0.0215452	0.0220271	0.0215201	0.00995199	0
114.6	-0.0129095	0.0271074	0.0267203	-0.0094432	0.0433211	0.0444552	0.0119434	0.00794632	0.00107924	0.0199705	0
114.8	-0.0288237	0.0375333	0.0264405	-0.0143729	0.0346978	0.0155715	-0.0078041	-0.0650996	-0.011147	-0.00475142	0
115	0.0334666	0.0126034	-0.0106743	0.0223881	-0.0114144	-0.0320561	0.003867	-0.0203191	0.0397101	-0.0352758	0
115.2	0.0590779	0.000722504	-0.0307738	0.0153005	-0.00219396	0.00880701	0.0413672	0.0738501	0.0552856	-0.022075	0
115.4	0.00516508	-0.0361224	0.0135652	0.0177462	0.00611769	0.0444797	-0.00159897	-0.0243335	0.0153131	-0.0454044	0
115.6	-0.00588876	-0.0170984	-0.0135697	-0.0188814	-0.0198568	0.0156902	0.0188157	0.0056381	0.0258179	-0.0157203	0
115.8	0.0102361	-0.0194026	-0.015122	-0.0564961	-0.0120768	-0.0188163	0.00954098	-0.00943554	-0.0106733	0.0427868	0
116	0.0238576	-0.00422894	0.0157998	-0.0329101	0.0024375	-0.0453129	-0.0120134	-0.021014	-0.0374991	0.0192565	0
116.2	0.0161233	0.0174916	0.0122674	0.00117363	0.00894289	-0.0308137	0.016087	0.00368847	-0.0284137	-0.00726119	0
116.4	-0.01126	0.0068706	-0.0298225	0.0166475	0.0111035	0.018644	0.0414492	0.0225567	-0.0304198	0.0165147	0
116.6	-0.0329537	0.0052228	-0.0388435	0.0274573	0.00111548	0.0179153	-0.0133261	0.0200458	-0.0204807	0.0112458	0
116.8	-0.0293844	0.0256516	0.0062803	-0.0187705	0.0077776	-0.0234059	-0.0731561	-0.0369941	0.0353524	0.012185	0
117	0.00776337	-0.000631155	-0.00673332	0.00102116	0.0213601	0.0380554	-0.0388507	-0.00739443	0.0166235	-0.00173354	0
117.2	0.0255394	-0.0176934	0.0147693	0.0290832	0.00492179	-0.0192587	-0.0418183	-0.0275925	0.0123465	0.0293142	0
117.4	-0.0137737	-0.00260703	-0.00153943	0.00157104	0.0129352	-0.00552748	0.0341467	-0.0319131	0.0132057	0.0286118	0
117.6	-0.0328547	0.0065023	-0.0190869	-0.0403111	-0.00503553	0.0437225	0.0556008	0.0351314	0.00459478	0.0158406	0
117.8	0.00526069	0.00463248	0.0261981	-0.023348	-0.0492554	-0.0379491	-0.0438914	0.0592267	-0.00678932	0.0282475	0
118	0.016814	0.0171142	0.0182524	0.0172819	-0.00635679	-0.0547472	0.00368913	0.0165853	-0.0419051	-0.0168877	0
118.2	0.0144285	0.00854509	0.0032131	-0.0317325	-0.0209766	-0.0142149	-0.0131564	0.0280495	-0.0254791	-0.0337805	0
118.4	-0.00465695	-0.00685193	0.0319247	-0.0316559	-0.0447597	0.00545195	0.0135587	-0.0431265	0.0228801	0.0100675	0
118.6	-0.0183154	-0.00147183	-0.00384218	-0.00390439	0.0148391	0.0168394	0.041505	-0.0195562	0.0158209	-0.0217698	0
118.8	-0.0159369	-0.00783388	-0.0351166	3.63654e-06	-0.00257151	0.00650321	0.00258861	0.0393426	-0.000979766	-0.0509604	0
119	-0.0246335	0.00598262	-0.0233701	0.0122425	-0.0360427	-0.00647295	-0.0292894	0.0220263	-0.0171626	-0.0369849	0
119.2	-0.0341434	0.0336237	-0.0127981	0.0220586	0.0490714	0.0154185	0.0106302	-0.00256105	-0.0352826	-0.0285491	0
119.4	0.0043863	-0.0278128	0.0346031	-0.00974955	0.0143691	0.0266625	0.0167739	-0.00903199	0.0318646	0.0310722	0
119.6	0.0180387	-0.00279448	-0.0150542	0.0740572	-0.0201792	0.0200605	-0.0516354	0.0233782	0.0354252	-0.0105084	0
119.8	0.0383332	-0.0153639	0.00521434	0.0560674	0.00514443	0.00733835	0.0180045	0.0319373	0.0345834	0.0194811	0
120	0.0363985	-0.0082417	0.0427991	0.00617047	0.0273635	0.0256704	0.0259521	-0.010221	0.024585	0.0181418	0
120.2	0.0323445	-0.00283523	0.0269579	0.0134866	0.0543706	0.016315	0.00408781	-0.0124367	-0.0123529	-0.00368967	0
120.4	0.0315939	-0.00347314	0.021942	0.0373695	0.0949895	-0.00628207	0.0207761	0.00786695	-0.0160606	0.0302122	0
120.6	0.00699192	0.0747592	0.0444844	0.05166	0.0813611	0.0241538	-0.0371179	-0.0294969	0.0222658	0.0332829	0
120.8	0.0250773	0.0987643	0.0139997	0.042962	0.0318324	-0.00730743	0.0175366	0.00348336	0.00630755	0.0137534	0
121	0.0109892	0.0691603	0.012538	0.0301737	0.0323211	0.00893586	0.0529907	0.0166206	0.0376991	0.0241583	0
121.2	-0.0080372	0.0185944	0.012377	0.0449059	-0.0111541	0.0410999	0.0311353	0.0550524	0.0292854	0.054757	0
121.4	-0.00136126	0.0233429	0.0230578	0.0481948	0.0154137	0.0029488	-0.00476998	0.0516033	0.00121007	0.00157473	0
121.6	0.00938736	0.0506936	0.0331513	0.0252431	0.0476309	0.0114103	0.013314	-0.00506578	0.0333144	-0.013922	0
121.8	0.0224659	0.0243185	0.0355998	0.0247247	-0.00884882	0.0809548	0.0237419	0.00782384	0.0620872	0.0757132	0
122	0.0606782	-0.00683535	0.059014	0.0523281	0.0161195	0.025046	-0.0485865	0.0763028	-0.00756465	0.0437211	0
122.2	0.0638047	0.00479937	0.0259097	0.0430781	0.0145702	0.0357966	0.0211567	0.0280564	-0.0363578	-0.0176217	0
122.4	0.00635738	0.0117731	0.0133792	0.0546157	0.00284881	0.0345767	0.0150417	0.0612555	0.0436826	0.0360413	0
122.6	-0.00411303	0.0384619	0.00331402	0.0557176	0.032343	0.0198664	0.0134544	0.00515714	0.0164379	0.0904628	0
122.8	0.0334381	0.0164703	0.00955745	0.0150553	0.0266286	0.0496394	0.0583656	-0.0243046	-0.0226689	0.0366135	0
123	0.0608626	-0.00402735	0.0563785	0.0160974	0.0216785	0.0641616	0.0756045	0.082822	0.0314459	-0.00357108	1
123.2	0.0944745	0.0713378	0.120083	0.0988845	0.0965776	0.052615	0.0730763	0.146501	0.055933	0.061622	1
123.4	0.139379	0.125101	0.168498	0.14153	0.107057	0.134588	0.1015	0.143782	0.0694354	0.0673413	1
123.6	0.123273	0.230178	0.148147	0.162997	0.0791471	0.103859	0.132745	0.11601	0.104867	0.03552	1
123.8	0.165411	0.164718	0.184595	0.156409	0.0294188	0.150753	0.148582	0.112063	0.0923338	-0.000241248	1
124	0.156671	0.15481	0.196828	0.132393	0.052753	0.159451	0.142305	0.115764	0.0794409	0.0174492	1
124.2	0.107568	0.188717	0.167754	0.144756	0.0767705	0.0920006	0.127891	0.11948	0.101065	0.0317947	1
124.4	0.0876168	0.159056	0.156506	0.137247	0.049918	0.0775077	0.0972826	0.0838174	0.114549	0.0123448	1
124.6	0.064874	0.192953	0.148389	0.0744098	0.0756169	0.0928651	0.0621002	0.0151117	0.0854227	0.0131074	1
124.8	0.119568	0.13466	0.165662	0.14306	0.072001	0.0572783	0.0818469	0.07154	0.0370923	-0.0277486	1
125	0.0717335	0.0931326	0.140823	0.0902201	0.00629656	0.0048112	-0.000916246	0.0750696	0.0647939	-0.0211551	1
125.2	0.0411253	0.0595552	0.14645	0.0335772	0.0493625	0.0198963	0.0277601	-0.00945534	0.0991978	-0.0171824	1
125.4	0.0570412	0.0514084	0.120836	0.0742001	0.0078967	0.0510506	0.0733649	-0.00426773	0.0634049	-0.0414648	1
125.6	0.0410724	0.0784815	0.0693978	0.0926825	-0.0744358	0.0364988	0.05452	0.021634	0.00312782	-0.0526053	1
125.8	0.00986376	0.0828981	0.0711743	0.0641242	0.00757617	0.00155657	0.0631444	-0.0147128	-0.00574464	-0.0584635	1
126	0.0220233	0.0481099	0.0758929	0.1119	0.0402048	-0.0240929	0.030646	0.0425908	0.0167907	-0.0783644	0
126.2	0.0199899	0.0430096	0.0792165	0.0841033	-0.00283088	-0.0394768	-0.0377591	-0.0230177	0.0179355	-0.0213447	0
126.4	0.00813278	0.0366004	0.0174858	0.0429348	-0.0113483	-0.0340981	0.0120508	0.0321075	-0.00724788	-0.0667965	0
126.6	-0.0317481	0.0504637	0.0452132	0.0267126	-0.00353729	-0.0328276	0.0154538	0.0835115	-0.0236612	-0.0909939	0
126.8	-0.0454364	0.0553145	0.0911701	0.0282906	-0.0171226	-0.0170603	-0.00472869	0.0102906	-0.0409976	-0.0610085	0
127	0.0106761	0.00943093	0.0579277	0.0238568	-0.00449003	-0.00720348	0.0167754	-0.0574509	-0.0320939	-0.0302502	0
127.2	0.0489718	-0.0398618	0.0427045	0.0130883	0.0318744	-0.0248046	0.0206182	-0.0133495	0.00887505	-0.0181588	0
127.4	-0.00759805	-0.035628	0.0428993	0.0277027	0.00591229	0.00112421	0.0698729	0.0446881	-0.0200678	-0.0838141	0
127.6	-0.0174752	-0.0291724	0.0309629	0.00201153	0.0584987	-0.025044	0.0371435	0.038137	-0.00765802	-0.0331803	0
127.8	-0.0101062	0.0150829	0.0433884	-0.0374565	0.0261054	-0.00266983	-0.0230603	0.00068116	-0.0137031	0.00391853	0
128	0.00198907	0.0108623	0.0453487	-0.00318723	0.001549	0.00628991	-0.0212012	-0.0465271	-0.0397854	-0.0139295	0
128.2	0.00823891	-0.0464334	0.0279041	0.0210515	-0.0059145	-0.0211654	-0.00953079	-0.0443219	-0.0396336	-0.0581835	0
128.4	-0.00101759	-0.053847	0.00817451	-0.0110936	-0.051959	-0.0249414	-0.0260894	-0.0314589	-0.014935	-0.0726551	0
128.6	-0.0077297	-0.00675247	-0.0230595	0.00568377	-0.0388445	-0.0224712	0.00357487	-0.0703201	0.00112543	-0.0237101	0
128.8	-0.0249984	0.0162674	-0.0265687	-0.0113402	-0.0280841	-0.020237	0.0305061	0.0220357	0.000472934	-0.0408012	0
129	-0.00754215	0.0261228	0.000877168	-0.0155573	-0.0129675	-0.0102575	-0.0435386	0.0170814	0.00695405	-0.0231033	0
129.2	-0.0206264	0.0299343	-0.00721006	-0.0175651	-0.00321281	0.0224532	-0.00262239	0.0157692	0.0136502	0.00814391	0
129.4	-0.0318593	-0.00865698	-0.0176386	0.0079473	-0.0137128	0.00609788	0.00933798	0.0243653	-0.0160425	-0.0175451	0
129.6	-0.0142723	-0.019295	-0.0258458	0.0174611	0.00810843	-0.0154613	-0.0383248	-0.0109053	-0.0316703	-0.00296805	0
129.8	-0.00864584	0.0500705	-0.0350375	-0.0223512	0.0442529	0.032887	0.0169768	-0.0245651	-0.000151393	0.0641072	0
130	0.00251444	0.0471894	0.0182458	-0.00293981	-0.0109312	0.032416	0.0393894	-0.00414342	-0.00311467	-0.00240561	0
130.2	0.0309141	-0.0457231	0.00889994	0.0304117	-0.00941281	-0.0177017	0.0499598	-0.0387718	0.0147353	-0.00101463	0
130.4	0.0164009	-0.00865603	0.000381908	0.0169863	-0.0114556	0.0223843	-0.0249892	-0.00776935	-0.001038	0.00901241	0
130.6	0.0075108	0.0093522	0.0165347	-0.00774797	-0.0247706	0.0226439	0.0120617	0.000813644	-0.00713747	-0.0281182	0
130.8	0.00805425	-0.0419067	0.0350378	-0.0296221	-0.0444241	-0.0301321	0.0615033	-0.00746262	-0.0136319	-0.0422033	0
131	0.0200793	-0.036499	0.0290712	-0.0156997	-0.0346197	-0.0386364	-0.00869979	0.0295342	-0.0316427	-0.00579641	0
131.2	0.0372347	0.0175558	-0.00031382	0.0229831	0.0278775	-0.0158638	-0.0446085	0.0455423	-0.00300717	0.00919611	0
131.4	-0.033395	0.029608	-0.00679384	-0.0373919	0.0340669	0.0054314	-0.043619	0.0111917	0.0272316	-0.00227358	0
131.6	-0.0207167	0.026656	-0.011952	-0.00869788	0.00526934	-0.0158376	-0.0349524	-0.0251806	-0.0414464	0.0093695	0
131.8	-0.0268215	-0.0349068	-0.0257864	-0.00075719	0.00772486	-0.00209958	-0.0533046	-0.00290273	-0.0540145	-0.011602	0
132	-0.00677033	-0.0227846	-0.00256512	-0.0137005	0.0312998	0.0267546	-0.0358971	-0.0190569	-0.00671013	-0.0076547	0
132.2	0.00848644	0.00437235	0.00301921	-0.0171565	0.0229991	0.0102051	0.0218485	-0.0306725	0.0101301	0.00338579	0
132.4	-0.0252145	-0.0247012	-0.0293474	-0.0172163	-0.00174978	-0.0191866	0.0422533	0.011606	0.00455812	-0.00809705	0
132.6	-0.00869877	0.0191924	-0.0134639	0.000309668	0.0180354	-0.00454675	0.00826827	-0.0137625	0.014823	0.0198567	0
132.8	-0.0420457	-0.0250602	-0.0417801	-0.033278	0.026004	0.00164757	-0.0242766	-0.0275737	-0.00581423	-0.00928603	0
133	-0.00133136	-0.01414	-0.0465229	-0.0141631	-0.0472559	0.00780705	-0.00955777	-0.0661891	-0.00689044	-0.00549267	0
133.2	0.014938	-0.00896012	-0.0138734	0.0346571	0.00128278	-0.00264659	0.013394	0.00362892	0.00719498	-0.00234438	0
133.4	0.0145099	-0.0237203	0.0277693	0.013277	0.0372779	-0.0130415	0.026719	0.0480044	0.0177173	-0.013035	0
133.6	0.0257706	-0.0107829	0.016033	-0.0240974	-0.0198297	-0.00980535	0.032889	-0.0159378	0.00480089	-0.0204256	0
133.8	0.00579136	-0.00086546	-0.0294107	0.00767215	-0.0336241	-0.0180576	0.0142978	-0.0173736	-0.0213477	-0.00917265	0
134	0.013083	-0.00481742	0.000746142	0.00541825	-0.0623911	-0.0391822	-0.027526	0.040133	-0.00554873	0.0349924	0
134.2	0.0463247	0.0594175	-0.0147685	-0.0222669	-0.0198508	-0.0275851	-0.0396806	-0.00559153	0.0171357	0.0133144	0
134.4	0.00875403	0.0288488	0.0175179	0.00922401	-0.0230359	0.0123832	-0.0225081	-0.00369399	-0.00407199	0.00195357	0
134.6	-0.00427251	-0.0487972	0.0159266	0.0352254	0.0397055	0.0193846	-0.018458	-0.00228183	0.0182359	0.0299739	0
134.8	1.82772e-05	-0.0375105	0.0362842	0.019689	0.0556112	-0.0107749	-0.0134899	0.0205311	0.0383884	0.0432952	0
135	-0.0174507	0.0341737	0.0758165	0.0140633	-0.0303197	-0.0194706	-0.00164098	0.0501287	-0.0114699	0.000535849	0
135.2	-0.000328585	0.0342184	-0.00650708	0.018691	-0.00914444	0.0126391	-0.0207951	-0.0111015	-0.0375401	-0.0387508	0
135.4	-0.0163163	-0.0251202	-0.0275008	-0.0160928	0.0136583	0.0409726	-0.0338979	0.0100842	-0.0074359	0.01219	0
135.6	-0.0428795	0.0138379	-0.00989315	-0.0126615	0.0513152	0.0611989	0.00777572	0.0151894	0.00773589	0.0087888	0
135.8	-0.0114407	0.0485009	0.0378254	-0.00618644	0.055689	0.00995838	0.0593111	-0.000604423	0.0415927	0.00985727	0
136	0.0066567	0.00593693	0.0078191	-0.00969682	0.0337643	-0.0117963	0.0294124	-0.0223078	0.0392343	0.0164656	0
136.2	-0.000672988	-0.0206177	-0.0374292	-0.0109935	-0.00357039	-0.00443695	0.0265206	-0.0353009	-0.001755	0.00712942	0
136.4	0.00881712	0.012335	0.0055353	0.0119833	-0.0376783	-0.0354608	0.0793215	-0.0272354	-0.00980841	-0.00330974	0
136.6	0.00591786	0.0101892	0.00345241	0.0414959	-0.012179	-0.018625	-0.00658987	-0.00605553	-0.00654517	-0.0174476	0
136.8	0.0450969	-0.00355781	-0.0367821	-0.0303399	0.0218342	0.0123706	-0.0396227	0.0436893	-0.0321629	0.0013499	0
137	0.0323836	-0.0143351	0.0182037	0.0205838	0.00485576	-0.0101467	0.0105673	0.0784212	-0.0399592	0.0242964	0
137.2	-0.0130658	-0.00402648	0.012285	-0.00513987	-0.0275016	0.000337034	0.016923	0.00982673	-0.0147549	0.0296866	0
137.4	-0.00526329	-0.0130041	-0.0436872	-0.0425952	-0.0279912	0.00743662	0.00421791	-5.76858e-05	-0.00957685	0.00542986	0
137.6	-0.0049951	-0.0220522	-0.0233892	-0.00940756	-0.0160664	-0.0108568	-0.00282247	0.027153	-0.000832029	-0.0458536	0
137.8	-0.0446831	0.00884043	0.0206195	-0.0180232	-0.0194299	0.00774496	-0.0335175	-0.036104	0.0345744	-0.062381	0
138	0.0191939	0.00197447	0.00197637	0.0340301	-0.00775671	0.0132258	-0.00682394	0.0325857	-0.00174751	-0.00517765	0
138.2	-0.0185666	-0.000196972	0.0209801	0.0327324	0.00291891	0.02975	-0.00560759	0.00738708	0.0022744	-0.0306998	0
138.4	0.000821889	-0.0171449	0.0119888	0.00656144	-0.00571298	0.00798544	-0.0384453	-0.0637335	-9.28055e-05	0.016846	0
138.6	0.00894988	-0.0186219	-0.00962384	-0.018091	0.0269818	0.000790917	-0.0317976	-0.0825984	-0.00789136	0.00906737	0
138.8	-0.0168117	-0.0259725	-0.0146889	-0.0329937	0.00503655	0.0232206	-0.0360348	-0.0253018	0.00569331	-0.0421495	0
139	0.00544951	-0.0169569	-0.0170118	-0.016353	-0.0389172	0.0146607	-0.0268831	0.0294652	0.0181198	0.00142592	0
139.2	0.024634	0.0491058	-0.0237021	0.0188872	0.0493129	-0.0170665	0.0655842	0.00428371	0.0012113	0.0375505	0
139.4	0.00558705	0.0118419	-0.0281285	0.00891468	0.01181	-0.0035858	0.0111987	-0.0164885	-0.017603	0.00149683	0
139.6	-0.00262516	-0.0029656	0.0405305	-0.0155796	-0.00219079	-0.00450151	0.0238637	-0.039635	0.00755363	0.0523809	0
139.8	-0.0271982	0.0187219	0.0644839	0.0401889	-0.0431397	0.0122391	0.0345362	0.016331	0.0147964	0.0249753	0
140	-0.00697664	0.00746736	-0.00474517	0.013285	-0.0325029	-0.00524793	0.038511	0.0659357	-0.00181891	0.00286036	0
140.2	0.0195776	-0.00934403	-0.019647	-0.0369577	0.019421	-0.0229746	0.0411571	0.0342476	-0.00852741	0.0287013	0
140.4	-0.00114631	0.00426965	0.0540256	0.0209814	0.0153918	0.00376402	0.00476921	0.00683985	-0.00840498	0.0132423	0
140.6	0.0243544	-0.0150874	0.0302354	-0.00547459	0.025817	-0.0179878	-0.013783	0.0273597	-0.0167348	0.0228019	0
140.8	-0.00655466	-0.0178233	-0.0126343	0.0274236	-0.00448875	0.0159814	-0.0276292	-6.68388e-05	-0.0118523	-0.0270623	0
141	0.0096221	0.0262188	-0.0309849	-0.0039285	0.0465867	-0.00785555	-0.00760211	-0.0231571	0.0478002	-0.0262038	0
141.2	0.0189638	0.0141542	-0.0120273	0.00605481	0.0109746	-0.0335151	0.0024043	0.00866096	0.00112211	-0.0338115	0
141.4	0.00690523	0.0006682	0.0235282	0.0489849	-0.0532005	-0.000753324	-0.0226158	-0.000557426	-0.0245485	-0.0243282	0
141.6	0.0112503	0.0116186	0.0324665	0.0152811	-0.00677864	0.024792	-0.0370296	-0.0417462	0.0312215	0.0060459	0
141.8	0.0107545	-0.0178837	0.000790769	-0.038381	0.0354476	0.003243	-0.00969593	-0.0279878	0.0022184	-0.0096271	0
142	0.00102554	0.00395986	-0.0263698	-0.0212546	0.00357747	0.00759764	0.00441251	-0.0426212	0.0171434	0.0137564	0
142.2	-0.00745918	-0.019661	-0.00912543	-0.0199163	-0.00428744	0.023351	-0.0237084	0.0582122	0.0588037	-0.00918101	0
142.4	-0.025098	0.020068	-0.0033736	-0.0181308	-0.0330159	0.0384053	0.0518731	0.0199628	0.0261703	0.0248579	0
142.6	-0.0200934	-0.00201187	0.0107465	0.010399	-0.0403711	0.00427895	0.0431868	0.01419	-0.0367996	0.0221246	0
142.8	-0.0119731	-0.0318086	0.0064127	-0.000149112	-0.00885712	-0.0262977	-0.0222952	0.0550222	-0.0594646	-0.018701	0
143	-0.0164185	0.0284609	-0.0274178	-0.0396431	0.00635046	-0.0179571	0.00520191	0.00660578	-0.0499487	-0.0115714	0
143.2	-0.000455669	0.0200353	-0.000419766	-0.00484772	0.013521	-0.0244934	0.0102449	0.00141406	-0.0274466	-0.00796855	0
143.4	-0.0106999	0.00691601	0.0312092	0.0164749	0.0492922	0.024505	0.0303337	-0.024097	0.0108328	0.0173916	0
143.6	0.0112906	-0.0246341	-0.0655263	0.0115413	0.0134421	0.00299362	-0.0189338	-0.0225756	0.00653455	0.0512313	0
143.8	0.0142708	-0.0231222	-0.0265677	-0.00508594	-0.00142898	-0.0127041	-0.03582	-0.00733409	0.0252042	0.0185961	0
144	0.0084752	0.0275175	0.0148497	-0.0315538	0.0218081	-0.0236059	-0.0291303	0.00505666	0.0204091	-0.000648139	0
144.2	0.0186852	0.0425898	-0.0238263	-0.0198888	0.0223847	-0.0327016	-0.00476069	0.0374017	0.00735564	0.00450574	0
144.4	0.0225841	0.00995104	0.0176562	0.0301411	-0.0054376	-0.00281708	0.0327199	0.058029	0.0318596	-0.0268346	0
144.6	0.0131937	0.0151496	0.0218767	0.0137074	-0.0468127	0.00396745	-0.0132607	-0.000747627	0.00296482	-0.00940092	0
144.8	-0.0304764	-0.0556501	-0.00375065	-0.0114332	-0.0820143	0.00822489	0.0317772	-0.0356412	0.0372348	0.008822	0
145	-0.0249775	-0.00596025	-0.00620223	-0.0169004	0.0129211	-0.0033388	0.0091108	-0.0763197	-0.0107362	-0.0383697	0
145.2	0.00443912	0.0204331	-0.0208432	0.0117727	0.00980491	-0.00565252	-0.00604405	-0.0425111	-0.01389	-0.0212946	0
145.4	-0.00586397	-0.0300014	-0.00548418	0.0228041	-0.0221641	0.00520128	0.00210365	0.025791	-0.00218461	0.017201	0
145.6	-0.0332963	-0.0303884	0.0400232	0.00891349	0.0133058	0.00872393	-0.0280129	0.030064	-0.0393571	0.00120955	0
145.8	-0.0102067	0.00157843	0.0246163	0.0165056	-0.0110133	0.00542892	-0.041888	0.000191919	-0.0163834	-0.00146945	0
146	0.0341368	-0.0190438	-0.00575555	-0.00161103	0.0458621	-0.00100305	-0.0280389	-0.0260523	-0.0084138	-0.0182528	0
146.2	-0.00512917	0.00119813	-0.0304585	0.00252714	-0.0191016	-0.0195516	-0.0323534	-0.0473036	-0.0209881	0.021016	0
146.4	-0.000225921	-0.00611173	0.0347457	0.0310659	-0.049384	-0.00707327	-0.0116019	-0.0478056	-0.0268236	0.00468643	0
146.6	0.00377095	-0.00686196	0.0144183	0.0205898	0.0109338	0.0114229	0.0217213	0.013235	-0.0123544	-0.0179953	0
146.8	-0.0161167	0.00876463	-0.0216894	-0.00320406	0.0511703	0.0165707	0.0152368	0.0570848	0.0232249	0.00478368	0
147	-0.00677055	-0.0155057	0.0369259	0.00365679	0.0269458	0.00605739	-0.0100928	0.015763	0.0420618	-0.00465645	0
147.2	-0.00359392	-0.0355526	-0.0128831	-0.0159442	0.00982775	-0.0209606	0.0134663	-0.017621	0.0160664	-0.0489367	0
147.4	0.0136498	0.0101504	-0.0149237	-0.0435039	0.0318317	0.0100228	0.0480462	-0.0170167	0.0234121	-0.0139443	0
147.6	-0.0100902	0.0302213	0.0103504	0.00316606	-0.0165659	0.0131775	0.0301764	0.0115647	0.0112248	-0.0198615	0
147.8	0.00853499	0.0403836	-0.0123127	0.021612	-0.0487967	0.0178417	0.0633977	0.0363723	0.0189864	0.0451933	0
148	0.0428273	0.0354274	-0.0299009	0.012916	-0.00345736	0.00921038	0.0700388	0.0176479	-0.00375792	0.0525888	0
148.2	0.0427886	0.0245137	-0.0244675	0.000587584	0.0167718	-0.00147752	0.0314412	0.0126717	-0.0158114	0.0051361	0
148.4	0.0227397	0.0282377	-0.0178467	-0.0249466	-0.00945313	0.0208334	0.0168908	0.0324103	0.0356273	0.0473228	0
148.6	-0.0234701	-0.00319483	0.0453748	-0.00152739	0.0522498	0.00365673	-0.0524647	-0.0354416	-0.00796757	-0.0052436	0
148.8	0.00837517	-0.00814908	0.0375837	-0.024041	0.0392843	-0.00077372	0.0196467	-9.3428e-05	-0.00439161	0.00504568	0
149	0.00214017	0.00385847	0.0199427	0.012353	0.00620257	0.0320953	-0.0277874	0.0256446	-0.0264895	-0.0445017	0
149.2	-0.0299268	0.0260087	0.0103057	0.00861065	-0.0103035	0.00716096	-0.0475683	-0.00595766	-0.0119741	-0.0155596	0
149.4	-0.0332556	-0.0157512	0.0143455	-0.00710589	-0.00766571	-0.0124415	-0.0217173	-0.020204	-0.00519524	0.0477979	0
149.6	-0.0099008	-0.0509552	0.0114062	0.0193948	0.0258964	0.00731424	-0.0555194	-0.019645	-0.0208895	0.00660132	0
149.8	0.0137039	0.0223118	-0.0205567	-0.00529047	0.0310676	-0.0341905	-0.036717	-0.0263082	0.0313355	-0.024499	0
150	0.00156156	-0.0350627	-0.00172243	0.00105811	-0.0750201	-0.0263524	-0.00767001	0.0459237	-0.0124775	-0.0106556	0
150.2	0.00115146	-0.013748	-0.0318214	0.00636518	-0.0776103	0.000754374	-0.0163003	-0.0219314	-0.0468314	-0.0273789	0
150.4	-0.0165627	0.0267626	-0.0254928	-0.0159307	-0.00585209	0.00941622	0.0347618	-0.0227159	0.00293387	-0.00747244	0
150.6	-0.000303313	0.0152482	0.00943454	-0.015074	0.0241333	-0.010773	0.0365586	0.0347715	0.045957	0.00493195	0
150.8	0.0246067	-0.00325633	0.0208049	0.0063453	0.00390035	-0.0112464	0.0070069	0.0155053	0.0228513	-0.00372185	0
151	0.00649848	-0.0168064	0.0206182	0.00322058	-0.0110149	0.00851474	0.0380613	-0.0317427	-0.00341447	0.0133365	0
151.2	0.0114085	-0.0394399	0.00135119	-0.0072199	-0.00121845	-0.0238217	-0.00173821	-0.0180678	0.0157329	0.0105847	0
151.4	-0.013182	0.0240372	-0.0451529	-0.0169224	0.023247	-0.0234969	-0.0388034	0.0107477	0.0274555	-0.00658071	0
151.6	-0.0229856	0.0151866	0.007495	0.00853405	-0.000482305	0.0130437	-0.0162521	0.0123388	-0.0311254	-0.0136963	0
151.8	-0.0353194	-0.0370211	-0.00859583	-0.0160977	0.0152621	0.00463397	0.0131974	-0.0126667	-0.0488412	-0.0300022	0
152	-0.0148356	-0.0272258	-0.0207775	0.00803689	0.0461458	-0.0115008	-0.0146718	-0.0294322	-0.0370583	0.00719607	0
152.2	0.00771053	0.013382	0.0413797	0.0661743	0.015073	-0.00131947	-0.0321147	0.0191896	-0.0103793	0.0464291	0
152.4	-0.0228886	0.00373758	0.0173467	0.0273045	-0.0399002	-0.0189174	0.00582491	0.0586327	0.0352169	0.00644935	0
152.6	0.00710304	-0.0176052	-0.036262	0.0458798	-0.0525253	-0.0378669	-0.0232399	-0.0521178	-0.0172734	0.029814	0
152.8	0.0287249	-0.025654	0.00650949	0.0170296	-0.00988271	-0.00130096	-0.00571762	-0.00689492	0.0400703	-0.0101608	0
153	0.0110178	-0.00796673	0.018621	-0.0175356	-0.0382011	0.0359021	-0.0128568	0.00935924	0.0330311	-0.00782261	0
153.2	0.00944734	0.0121003	-0.00756718	-0.0327702	-0.0362715	0.0107262	0.00906481	0.0197392	-0.00485468	0.0239259	0
153.4	0.00425465	0.017195	-0.000613605	-0.0352827	0.0154217	0.0155677	0.0326282	0.0511343	0.0416627	0.0142171	0
153.6	-0.00659987	-0.000699458	0.0106424	-0.00586553	0.0182762	0.0458642	-0.000958432	0.0229637	0.0597039	-0.00670102	0
153.8	0.018237	-0.0117471	-0.0232182	0.0237291	0.0110238	-0.0128988	-0.00321458	-0.0266587	-0.0348398	-0.00294194	0
154	-0.0227208	0.0552945	-0.0147487	-0.0363715	0.0417444	0.013409	0.0174875	-0.0386769	-0.00954757	-0.033668	0
154.2	0.0163071	0.0500021	0.0269063	-0.0120326	0.0026921	-0.00360675	-0.0152477	-0.000360943	-0.0158686	-0.0404893	0
154.4	0.0195048	0.0323498	-0.000538833	-0.0136462	0.0247712	0.0251522	-0.0254612	-0.0126057	-0.019829	-0.00464294	0
154.6	-0.0028584	0.0118136	-0.0348689	-0.0116552	0.0347525	0.00473299	-0.00053975	-0.0254588	-0.00472609	0.00632318	0
154.8	0.00304305	0.010915	0.00412846	0.0196263	-0.00751658	-0.0509235	0.00874016	-0.00607491	-0.0128148	0.00983754	0
155	0.00367389	0.0262575	0.0419571	0.0127165	0.0136563	-0.0155694	-0.0145294	-0.00255466	-0.0352001	0.0480421	0
155.2	0.0078572	-0.0445319	0.00892417	0.0103885	0.0478733	-0.00941796	-0.0344928	0.00633328	-0.0335245	0.034523	0
155.4	-0.00722377	-0.0331022	0.0135631	-0.0246376	-0.00357555	0.0104343	0.0242175	-0.012929	-0.00242002	-0.0175326	0
155.6	-0.0093378	-0.00530088	0.0374318	-0.0319021	-0.0870723	0.0266649	0.0545873	-0.00827077	0.00762967	-0.0081365	0
155.8	0.00336008	-0.00185352	-0.0275198	-0.0503033	-0.0232558	-0.00362366	0.0212283	-0.0133173	-0.0108849	0.00475364	0
156	0.0108337	-0.0277844	-0.0746851	-0.0271866	0.038654	-0.0143311	-0.00245232	0.0133231	-0.0217393	0.00152245	0
156.2	-0.0106434	-0.0538672	-0.0226917	0.0434648	0.0104327	0.01376	0.0377407	0.0392867	-0.0102652	-0.00834298	0
156.4	-0.0468273	-0.028961	0.00336581	0.0358699	0.0236662	-0.0016159	0.0494162	-0.00956909	0.0151504	-0.0326267	0
156.6	-0.0306219	0.0140481	-0.00608784	-0.0205039	-0.0442792	-0.0266062	-0.0644868	0.0137015	0.0534269	-0.0084884	0
156.8	0.0069733	0.00619188	0.0341801	-0.0209992	-0.0372884	-0.00277097	-0.0274923	0.00306205	0.0341781	-0.00215591	0
157	0.0078	0.0104487	0.0439469	0.0275978	0.00338821	0.0177959	0.0286671	-0.0113892	-0.0467019	-0.015053	0
157.2	0.0157883	-0.0152999	-0.017632	0.0239727	-0.0156512	0.0149229	0.00254775	0.00791953	-0.0171357	-0.0241883	0
157.4	0.0290428	-0.0338966	-0.0416269	0.016867	-0.0219437	0.00345558	-0.010734	0.0152103	0.0237348	-0.0307536	0
157.6	0.013903	-0.00348649	0.00224782	0.0357798	0.01149	-0.00664511	0.00620628	-0.0210413	-0.0288876	-0.0273482	0
157.8	0.00137382	-0.00620228	0.00777932	-0.018432	-0.016973	-0.0125778	-0.0291293	-0.0422627	0.0074434	0.00526724	0
158	-0.014993	0.0271952	0.0340058	-0.0141643	0.00161543	-0.0167193	-0.00393705	-0.00601734	0.00549598	0.0253469	0
158.2	0.0109177	0.0389577	0.0211009	-0.0126447	-0.00416951	0.0136116	-0.00640213	0.00851588	0.00309933	-0.0067795	0
158.4	0.0111279	0.00467762	-0.012152	-0.00431003	-0.000451353	0.0186145	-0.0497092	0.00718322	0.000574266	0.00274004	0
158.6	-0.00162788	0.0188933	0.00125304	0.0045286	0.040904	0.00538954	-0.0271467	0.00855651	0.0171713	0.0230385	0
158.8	0.00802319	0.0463315	0.037918	0.0133062	0.0571145	-0.00741051	0.0236335	-0.0105786	0.0244017	0.0281027	0
159	0.014909	0.0184901	0.0317012	0.0248256	0.0148569	-0.0232628	0.00684237	-0.0315074	0.0128827	0.035468	0
159.2	0.00770956	0.0407759	0.00952312	0.000135974	-0.00235272	-0.00528521	0.00900713	0.0124208	0.0590339	-0.0230607	0
159.4	-0.0243198	-0.0106992	0.00528544	0.00507017	0.0305261	0.00348222	-0.00414915	0.0452505	0.0182763	-0.0429631	0
159.6	0.00239985	-6.32949e-05	0.0140912	-0.00270084	-0.0303332	0.0217765	0.0201786	0.00967663	-0.022358	0.00475891	0
159.8	0.0176576	0.0146105	-0.0266521	-0.00166537	-0.00804276	-0.00130321	0.020554	0.0347137	-0.00747717	-0.014795	0
160	-0.014453	-0.0105017	-0.0436452	0.013658	0.0448452	-0.00936549	0.0245345	0.0495611	-0.00040452	-0.0129208	0
160.2	-0.03459	-0.0229128	-0.0188838	0.0198422	-0.00361825	0.0213464	0.0467944	-0.0110441	-0.00613032	0.0425303	0
160.4	-0.0164513	-0.0216994	-0.0291206	0.0160646	-0.0194146	-0.0100042	0.0207479	-0.0170935	0.0106827	0.00319149	0
160.6	0.0130037	-0.014672	0.0360309	-0.00357415	-0.014774	-0.0426066	0.0250918	-0.0174726	-0.0313573	0.0149121	0
160.8	0.0132552	0.011633	0.04376	-0.0010004	-0.0701766	0.00548902	-0.0187574	0.00616918	-0.0201077	0.0177876	0
161	-0.0184146	-0.00562789	-0.012506	0.0204365	-0.00167394	0.0155829	-0.0615049	0.0354267	0.0027934	0.0383505	0
161.2	-0.0151141	0.0157259	-0.0123763	0.00238014	0.0558076	0.0187465	-0.0200287	0.0112331	-0.00227579	0.0552542	0
161.4	0.0199838	0.0324704	0.0166142	-0.00855792	0.00571781	0.0180676	0.0125165	-0.0209561	-0.014907	0.0191667	0
161.6	0.0328944	-0.0180684	-0.00564587	0.0288177	-0.0249733	-0.00748477	-0.0541893	-0.0103094	0.00288858	-0.00536378	0
161.8	0.0253072	-0.00691177	-0.0176782	0.0163067	-0.0120635	0.0151121	-0.068345	-0.0124619	0.0391074	0.0359373	0
162	-0.0155205	-0.0249595	-0.0303221	-0.0257162	0.0086397	-0.0244149	0.0444401	0.00566053	0.000615981	-0.0297044	0
162.2	-0.0360866	-0.0506633	-0.0041212	-0.0473063	-0.0129566	-0.0275903	-0.00716507	-0.0092516	-0.0122218	-0.0491824	0
162.4	-0.0382865	-0.0291428	0.0219093	-0.0461965	-0.0227132	0.0478711	0.0326448	0.00904185	-0.0301019	-0.0414464	0
162.6	-0.0381057	0.00203593	-0.0178696	-0.0224093	-0.0171629	0.0236125	0.0529222	0.00672873	-0.0165806	-0.0431768	0
162.8	-0.00510152	0.0305822	-0.0381788	0.0175896	0.0157842	-0.0493537	-0.0291136	-0.0166976	0.023567	-0.0141397	0
163	0.0273336	0.0461391	0.00745581	0.0251462	0.0537327	0.00717916	0.00754541	0.0213855	0.0109618	0.0243747	0
163.2	-0.032425	-0.0293853	-0.0329713	-0.02247	-0.00846682	-0.000263662	0.0126206	0.0333312	0.00250567	-0.010112	0
163.4	-0.00573917	-0.0269324	0.0244047	-0.0164747	0.0256436	-0.016747	0.0189888	0.0461339	-0.0112643	-0.0441896	0
163.6	-0.0111655	-0.00702883	0.0390863	-0.0157926	0.00913798	-8.48624e-05	0.0187474	-0.0110479	-0.0179642	-0.00210996	0
163.8	0.0151035	0.00779504	-0.0152516	0.0140125	-0.0146242	0.00468003	0.0381619	-0.0553245	0.0221598	0.0131302	0
164	0.0327085	0.00599127	-0.0155744	0.0493785	-0.0289912	-0.00221519	0.0157181	-0.04716	0.010434	0.00367436	0
164.2	-0.0020366	0.0016888	0.0126726	0.0262999	-0.039829	-0.00602385	-0.0436797	-0.0242127	-0.0364076	0.0269402	0
164.4	0.0193822	0.00920622	-0.0172544	-0.0162844	0.00122577	-0.0116202	-0.0291902	-0.000260415	0.0260386	0.0266379	0
164.6	-0.0150654	-0.0538148	0.0297694	-0.0397752	-0.0414093	0.0309287	-0.028515	-0.0211077	0.0128274	0.0118701	0
164.8	-0.0171699	0.024399	-0.0153381	-0.0133498	0.00519187	0.0204893	-0.00518629	0.00511192	-0.0355634	-0.0012664	0
165	0.00826774	0.0140709	-0.022294	0.00945283	0.0441595	-0.00993882	-0.036719	0.0162324	-0.00205143	0.0211182	0
165.2	0.0171547	0.0169588	0.0104462	-0.00108775	0.0116433	0.00141474	0.0081751	0.00671015	0.0243354	0.00492555	0
165.4	0.0175582	0.0575561	0.01282	-0.00465378	-0.00286692	0.028181	0.0349985	0.007056	0.002041	-0.0102354	0
165.6	0.0237454	0.00558743	0.0354096	0.032468	0.0205677	0.0208034	-0.0619003	0.00418412	-0.00307362	0.0315814	0
165.8	0.0112182	0.0107217	0.0706074	0.0577591	-0.000947923	0.000283775	-6.96515e-05	0.000219673	-0.0056308	0.0108236	0
166	-0.00536616	-0.0242416	-0.0115851	0.00440439	0.0147547	-0.00739013	0.0304211	0.0121063	0.0264072	0.0006656	0
166.2	0.00169047	0.0247235	-0.0110469	-0.0247033	0.0479382	-0.0314727	0.0223241	0.010767	-0.00541046	-0.027706	0
166.4	0.00983559	0.0171119	0.00748126	-0.0375521	0.0345122	-0.0117348	-0.0222128	-0.0101538	-0.0148682	-0.0155883	0
166.6	-0.0337797	-0.0468871	-0.00204836	-0.032141	0.00772752	-0.00544068	-0.0201834	-0.00507165	0.0133262	0.0125429	0
166.8	-0.0592545	-0.0433692	-0.00622362	-0.0104414	-0.0317853	-0.0242398	0.027475	0.0127408	-0.00291974	-0.00606146	0
167	0.00523743	-0.0109558	-0.0305705	-0.014832	-0.0959445	0.00258752	0.0129909	-0.0131175	-0.0305142	-0.0258617	0
167.2	0.0198779	-0.00986016	-0.0566248	-0.0128593	-0.0558854	-0.0225115	-0.0121759	-0.0196411	0.0119823	-0.00674657	0
167.4	0.0185643	0.0307635	-0.0400426	0.0165994	0.00115125	-0.0389369	-0.0193132	0.0450233	-0.00724307	-0.0386314	0
167.6	0.0111438	0.00582933	-0.0227948	0.0129335	-0.0204227	0.0353296	0.00747603	-0.0224303	0.0209044	-0.0260178	0
167.8	-0.00827841	-0.0203889	0.00250936	0.0223861	-0.0346919	0.0591877	0.0318368	-0.0219204	0.0589745	-0.000988955	0
168	-0.011483	0.0139111	0.0246348	0.0289994	0.0228209	-0.00745119	0.0418328	0.0016228	-0.00684287	0.0161067	0
168.2	0.000811463	0.0277954	0.0218788	-0.00597063	0.0281586	-0.0398777	0.0301716	-0.0462903	-0.0701339	0.0435896	0
168.4	-0.00183613	-0.00354676	0.00288225	-0.0169923	-0.0417502	-0.0103874	-0.00271165	0.042444	-0.0043196	0.022871	0
168.6	0.022503	0.0231302	-0.0413054	-0.00657487	0.0905062	0.00895945	0.0170913	0.00538351	-0.0311708	-0.0262299	0
168.8	0.00975549	0.0105976	0.0311036	0.0221414	0.0917506	0.000309987	-0.0508777	-0.0193851	-0.0056937	-0.00376789	0
169	-0.0235113	-0.0235988	0.0330983	-0.00133712	-0.0125478	0.00409261	-0.0499793	-0.00907297	-0.00550198	0.0184842	0
169.2	0.0165805	-0.00921995	-0.00823894	-0.0348914	-0.00276255	-0.00646817	-0.0109989	0.0336113	-0.00982334	0.0275103	0
169.4	0.0369905	0.0127536	-0.00284541	-0.0127439	0.017125	-0.0184124	0.0240509	0.0369635	0.0113251	0.00203511	0
169.6	-0.036559	-0.017088	-0.00211897	0.0237913	-0.0654145	0.0187524	0.0687305	-0.00706687	0.00646834	-0.0419927	0
169.8	-0.0244332	-0.0337682	0.00206637	0.00794384	-0.0175929	0.0517302	-0.00762347	0.0403166	0.0260517	0.0210465	0
170	-0.0406153	-0.0239496	-0.0125491	-0.0302578	0.00169542	0.0492592	-0.0305687	-0.00391025	0.0619655	0.031191	0
170.2	0.0081839	-0.0217768	0.00802007	0.00831091	0.0295422	0.0734376	0.0306133	0.0314415	0.0447431	-0.002315	0
170.4	0.0146634	-0.00561669	0.00188705	0.021155	-0.00907616	0.0341441	0.0498337	0.0113924	0.0439592	0.031764	0
170.6	-0.00447213	0.0180204	-0.0219393	-0.0313835	-0.0350189	0.00308274	0.00723957	-0.0300841	0.038397	0.0231411	0
170.8	0.0145955	0.0187559	-0.00402489	-0.0331233	-0.0192755	0.0171529	-0.00227317	0.0238541	0.000391412	-0.0264461	0
171	0.000663093	-0.00204025	0.0213336	0.0304026	-0.0365817	-0.0260587	0.029057	0.0393908	0.00238198	0.0348492	0
171.2	-0.00332796	-0.0240645	0.00683932	0.0067212	0.0651701	-0.016676	0.0060947	-0.0180804	0.00580346	0.0164801	0
171.4	0.0129279	0.00754568	-0.0146219	-0.0117075	0.00479739	-0.0374328	-0.00906151	-0.015014	-0.025607	-0.011116	0
171.6	0.00314109	0.0523092	0.000714237	-0.00220791	-0.0436954	0.00342816	0.0250174	0.0077703	-0.0214111	-0.00141767	0
171.8	-0.012969	-0.00575766	0.0187101	0.00639926	-0.00578847	-0.00952962	0.0156323	-0.0139991	-0.0153684	-0.00471485	0
172	-0.0133238	-0.0418854	-0.00100458	0.011712	0.00703533	-0.0507384	-0.0357684	-0.0245502	-0.0205712	-0.024052	0
172.2	-0.013431	0.00699335	-0.0199889	0.0202593	0.00491597	-0.0203954	-0.0544818	-0.0043365	-0.0122943	-0.0331724	0
172.4	-0.0179661	-0.0336883	0.00363358	0.00684315	0.0480486	-0.0353664	-0.0458083	-0.030279	-0.0196748	-0.0497237	0
172.6	-0.0127366	0.0310902	-0.00283923	-0.0280539	-0.0132768	-0.0213718	0.0129676	-0.0302745	-0.0193333	-0.0352293	0
172.8	0.0420606	0.0150104	-0.0215363	0.0191536	0.0236013	-0.0142315	0.000812878	-0.0324586	-0.0555699	0.00071187	0
173	0.0213612	0.00671166	-0.00813072	-0.00513489	0.00403137	-0.00418185	-0.0257271	-0.0314016	-0.050763	-0.00968438	0
[truncated: 370 more rows]

## Sheet: SEM
Time	gamma-5	gamma-4	gamma-3	gamma-2	alpha	stimulus
[truncated: 101 more rows]

[truncated: 1 more sheets: Average_left_right _combined]
