# Supplementary material for: Multiphoton imaging of neural structure and activity in Drosophila through the intact cuticle
Source: eLife. 2022 Jan 24;11:e69094. doi: 10.7554/eLife.69094 (PMC8846588; doi:10.7554/eLife.69094)
Supplement: Figure 7—source data 2. [file elife-69094-fig7-data2.xlsx]

## Sheet: Long_term_4hr
20200806	fly1
20200807	fly2
20200813	fly3

## Sheet: fly1
Time	gamma-L5	gamma-L4	gamma-L3	gamma-L2	alpha-L	gamma-R5	gamma-R4	gamma-R3	gamma-R2	alpha-R	stimulus			Time	gamma-5	gamma-4	gamma-3	gamma-2	alpha	stimulus
0											0			0	-0.0037379	-0.0147132	-0.00752089	0.0108659	-0.00707113	0
0.2											0			0.2	-0.0109433	-0.0270862	-0.00506065	-0.0191266	-0.0123917	0
0.4											0			0.4	0.0102661	0.00218949	-0.00726695	-0.00161291	-0.00380454	0
0.6											0			0.6	0.0027081	0.0128076	-5.92365e-05	-0.0031061	-0.0167141	0
0.8											0			0.8	-0.00755828	0.0138279	0.0130327	-0.00713736	0.00111432	0
1											0			1	0.00924508	0.0123235	0.0190333	0.00194724	0.00587256	0
1.2											0			1.2	0.0140403	0.00377694	0.0422253	-0.000331181	-0.00959669	0
1.4											0			1.4	0.0108118	0.0110276	0.00126662	-0.00466452	0.0031402	0
1.6											0			1.6	0.00915338	0.0244524	-0.00363874	0.00511419	-0.00422241	0
1.8											0			1.8	-0.00944049	0.0283068	-0.000380667	0.000631872	-0.00699913	0
2											0			2	-0.010829	-0.00818034	-0.0054987	-0.0151574	0.00517913	0
2.2	-0.00699632	0.00346813	0.0013057	0.0121376	0.0158527	0.0174089	-0.0637891	0.00835196	-0.0452212	0.00909718	0			2.2	0.00401776	-0.0273341	-0.0180899	-0.0102501	0.0139872	0
2.4	0.0100938	-0.0236205	0.0105742	-0.0145682	-0.00353062	0.00189942	-0.0286488	0.0151358	-0.0470828	0.0198091	0			2.4	0.0164653	-0.00103683	0.0105626	0.00485157	0.00806046	0
2.6	0.0196301	-0.0362577	0.00544039	-0.0428967	-0.0193329	-0.0256043	0.00755215	-0.0057266	-0.0117795	0.0026345	0			2.6	0.00993667	0.0218183	0.0238037	0.0154075	-0.00217394	0
2.8	-0.00333482	-0.0163229	-0.00756289	-0.0145843	0.00679012	-0.015882	-0.0347123	0.00209753	0.0675073	0.00226597	0			2.8	-0.00637863	-0.00662505	-0.00375863	0.0216605	0.00587552	0
3	0.00812119	-0.00732334	0.00514733	-0.00268098	-0.0269216	0.0184763	-0.01571	0.00427841	0.0413144	-0.0131355	0			3	-0.00391886	-0.0233114	-0.0212992	0.0138966	0.00599063	0
3.2	-0.0142041	-0.00944855	0.0203268	0.00993233	-0.0157936	0.00533716	0.0039252	0.00106998	0.0421337	-0.0183504	0			3.2	-0.0069193	-0.0192158	-0.0168735	-0.00769357	0.0172139	0
3.4	-0.0133247	-0.0408463	-0.0136268	-0.0118875	0.0061704	0.00465365	0.0173111	0.029674	0.0293586	-0.010141	0			3.4	-0.0105187	-0.0210125	-0.00218841	0.0155305	0.000388814	0
3.6	0.00462895	-0.0250113	-0.0206282	-0.0388826	0.0251229	0.0205633	0.026096	0.0265477	-0.0417756	-0.020083	0			3.6	-0.0106986	-0.0232001	0.00736241	-0.00618588	-0.0227069	0
3.8	-0.00429951	0.0458729	0.0138517	-0.0230456	0.0445517	0.00458896	0.00667984	-0.0561539	-0.0331718	-0.016202	0			3.8	0.000131199	0.0109168	0.00532793	-0.0248768	-0.0129308	0
4	0.0270312	0.011487	-0.0322916	-0.0172879	-0.0152381	-0.00646124	-0.00365957	-0.0860009	0.0606263	0.0436805	0			4	-0.00530608	0.00640796	0.00359786	-0.0147676	0.0162966	0
4.2	-0.0063696	-0.0412362	-0.00413524	0.0177584	0.00363044	-0.049332	-0.00573475	-0.00577699	-0.00931521	0.0234856	0			4.2	-0.0123066	-0.00124227	0.00160578	-0.00813299	0.0113932	0
4.4	-0.0274138	-0.0868632	-0.033713	-0.00226392	-0.00274202	0.00886587	0.0387916	0.0178892	-0.0568025	-0.0311504	0			4.4	-0.00954009	-0.0166777	-0.0220067	0.0025671	0.00221809	0
4.6	-0.0116521	-0.0301629	-0.0254904	-0.0177759	0.000507556	0.0225151	0.00189345	0.0420229	0.00437947	-0.0439754	0			4.6	0.00638589	-0.00166144	0.00373002	-0.00773753	0.000776783	0
4.8	-0.0144438	0.0489227	0.0213128	-0.0250109	-0.00751824	0.00220064	-0.0185263	0.0370752	0.0237975	-0.0149936	0			4.8	0.0167401	0.0101213	0.00358351	-0.00855185	-0.00186171	0
5	-0.00976444	0.0464269	0.0482897	-0.0104877	-0.0181121	0.000697435	0.0317598	-0.0046726	-0.0240731	0.0137656	0			5	0.0149111	0.0265043	-0.000688356	0.00451003	-0.0120819	0
5.2	0.0257048	0.0199235	0.0519225	0.0392663	0.00712859	-0.0243197	0.00742457	0.0155773	-0.0199543	0.0188495	0			5.2	0.00791423	0.0267751	0.00341894	0.0294574	-0.00660836	0
5.4	0.00107331	0.0253498	-0.0207678	0.0108646	-0.0360346	0.0195232	-0.0342835	0.0284013	-0.00191446	0.00546815	0			5.4	0.00593989	0.00323299	-0.011902	0.0183106	0.00454002	0
5.6	0.0519092	0.0674544	-0.0136906	0.0365626	-0.0050227	0.0349909	-0.0201733	0.00462333	0.0510277	-0.00963103	0			5.6	-0.0221882	0.01512	-0.00208806	-0.00461668	0.0103599	0
5.8	0.0202098	0.0754314	-0.0291915	0.0228096	0.0366485	-0.0330684	0.0192948	0.00934418	0.00672067	-0.0180286	0			5.8	-0.00779968	-0.00630206	0.0169505	0.0152154	0.00544763	0
6	-0.0123467	0.0234601	-0.00932701	-0.00365336	0.04005	-0.0174258	0.0331712	-0.00596393	-0.00812865	0.00196356	0			6	0.0231648	0.0109975	0.0188432	0.00212317	-0.0149262	0
6.2	-0.0223762	-0.0146807	0.0330147	0.0195717	0.0154444	0.0323821	0.00678504	-0.0277744	0.0169225	0.00979945	0			6.2	0.00100713	0.014871	0.016163	-0.00595922	-0.00822988	0
6.4	-0.0249031	0.00103845	0.0186736	0.0427951	-0.0196215	0.0290697	-0.0204159	-0.0196835	0.0329777	-0.015976	0			6.4	-0.00764166	0.01932	0.0102809	0.0159413	0.00127581	0
6.6	0.0484712	0.00284493	0.0099628	0.016044	-0.0271685	0.0680648	0.00272482	-0.0238799	0.081216	-0.0100793	0			6.6	0.00677041	0.0128314	-0.00085318	-0.00463399	-0.0109687	0
6.8	0.0254085	-0.0193693	0.0207117	-0.0114718	0.0170571	0.0164892	0.0432153	-0.00103513	-0.0151213	0.0250203	0			6.8	0.00973218	0.0129069	0.0099773	-0.0164435	-0.00822296	0
7	0.0321903	0.0206641	0.0234115	-0.0446295	0.00256343	-0.016159	0.0157728	0.0014891	-0.0160764	0.0177766	0			7	0.0086342	-0.0292632	0.00843325	0.0100782	-0.00416721	0
7.2	0.0323221	0.0295206	0.0317434	0.0335636	-0.001946	0.0111409	0.0447264	0.0222811	0.0128948	-0.0315793	0			7.2	-4.5095e-05	0.0226332	0.0116967	0.0124945	0.000645261	0
7.4	-0.00195416	-0.000291539	0.0224866	0.0846553	0.00176515	0.0159481	0.0605165	0.0167977	0.00739609	-0.0214024	0			7.4	-0.00410065	0.0172935	0.0188031	0.012676	0.0140226	0
7.6	0.000520309	-0.0228839	-0.000160088	0.0159932	-0.015513	0.0106173	0.013797	0.00329986	0.0258688	0.00740834	0			7.6	0.0258431	0.0215917	0.03228	0.0279238	0.01246	0
7.8	0.0501411	-0.0252373	0.00164299	-0.0295733	-0.0310434	0.0407446	-0.0152412	0.0303113	0.032079	-0.0262564	0			7.8	0.0271125	0.00808176	0.0270671	0.0223205	0.00594628	0
8	0.0479716	0.0169153	-0.000355378	-0.00572048	-0.0255254	0.0185333	-0.0254912	0.0248693	-0.0418362	-0.0180941	0			8	0.00785622	0.0171036	0.014068	0.0343032	0.01742	0
8.2	0.00563361	0.0547957	-0.0351424	-0.0156442	0.0425198	-0.0321093	0.0271536	0.0407477	0.00150616	0.00132846	0			8.2	0.0177681	0.0269279	0.0298343	0.0596903	0.0262406	0
8.4	0.00195574	0.0174422	0.0098796	-0.0218037	-0.00294972	-0.0430981	-0.0457354	-0.00654262	-0.0240887	-0.015674	0			8.4	0.0225805	0.0282832	0.0322908	0.0366167	0.00692523	0
8.6	-0.0512552	-0.0291982	0.00467694	-0.0271893	-0.0119191	-0.0368239	-0.0471222	-0.0117769	-0.0561606	-0.00594176	0			8.6	0.0224905	0.0495836	0.0431307	0.0311139	0.012401	0
8.8	-0.0577774	-0.0162851	-0.0137081	-0.0293903	0.0194457	-0.0530498	-0.0122241	0.0111401	0.00762873	0.0116458	0			8.8	0.0286165	0.0549677	0.0424482	0.0374872	0.0124733	0
9	0.0184074	0.00733008	-0.0026987	-0.00804219	-0.010427	-0.0545979	-0.0360734	0.00125276	0.051323	0.00609625	0			9	0.0406076	0.0530635	0.0567552	0.0241295	0.0165345	0
9.2	0.0167791	0.000471448	-0.0453306	0.0160388	-0.0243239	-0.000403432	0.0109165	0.0117518	-0.0216682	0.0195985	0			9.2	0.0375217	0.0509126	0.0537168	0.0280398	0.0286932	0
9.4	-0.00246375	0.0306337	-0.0310599	0.0155834	0.00993182	0.0345309	0.0294243	0.00140911	-0.0527433	0.0221794	0			9.4	0.0385493	0.0412257	0.0636398	0.053289	0.0209865	0
9.6	-0.0206592	0.00408409	-0.0514526	0.0280217	0.00896912	0.000957038	-0.0423756	-0.0689275	-0.00811994	-0.0084288	0			9.6	0.0361776	0.0455985	0.0617108	0.025704	0.0259969	0
9.8	-0.0283671	-0.050224	0.0322526	-0.0144231	-0.0334016	-0.00281245	-0.00594498	-0.0488658	-0.00871137	0.0182534	0			9.8	0.0358263	0.0528179	0.0857477	0.0278707	0.0205269	0
10	-0.027493	-0.0140334	0.0306614	-0.0191378	-0.0100634	0.0137981	-0.0281248	-0.0183334	0.0303986	0.0199267	0			10	0.0592036	0.0846625	0.0883013	0.0846273	0.0413697	1
10.2	-0.00135207	0.00473627	0.00735404	0.0274243	0.00971299	0.0326873	-0.0201027	-0.00848718	0.0455191	-0.0216562	0			10.2	0.120269	0.135432	0.137968	0.124285	0.10643	1
10.4	0.0138166	-0.0448178	0.0684335	0.0137823	-0.0155911	0.0339448	0.0889753	0.0215464	-0.0277161	-0.0295834	0			10.4	0.13886	0.17221	0.186651	0.119632	0.118416	1
10.6	-0.0304984	0.0127239	-0.00991722	-0.0366826	0.0362177	-0.013004	0.000419683	0.00321299	-0.00967053	-0.0267336	0			10.6	0.135731	0.161007	0.157478	0.104851	0.110654	1
10.8	-0.0192225	0.0260061	0.0041233	-0.0218415	0.0121378	0.00672443	0.0127914	0.000634384	0.00551392	-0.0160844	0			10.8	0.132526	0.13316	0.133793	0.121734	0.106322	1
11	-0.0162463	0.0192759	0.00151698	-0.0390878	0.0220471	-0.0184844	0.0259272	0.00266792	-0.016765	0.031002	0			11	0.116555	0.133031	0.119097	0.108943	0.090561	1
11.2	-0.000427776	0.0151237	-0.0485006	-0.00495873	-0.0023236	0.016766	-0.0583891	0.00704418	-0.00109664	0.0129961	0			11.2	0.0912488	0.116188	0.0950205	0.0856049	0.0890251	1
11.4	0.00761182	-0.0136179	-0.00037825	0.0189521	-0.00753399	0.0147515	-0.0560955	-0.00910629	-0.0238671	-0.00388977	0			11.4	0.0530563	0.0933361	0.0787963	0.0812281	0.075926	1
11.6	-0.00229631	-0.0295217	0.0414447	0.0117828	0.0117588	-0.0504155	0.0168607	-0.00289901	-0.055085	0.0389684	0			11.6	0.0435759	0.0756475	0.0562161	0.0780564	0.0547206	1
11.8	0.0165355	-0.0169259	-0.0453971	0.0601763	-0.0126298	-0.0393257	-0.0180631	0.0484274	-0.00343547	0.0504711	0			11.8	0.040275	0.0736844	0.0609197	0.0481745	0.0376811	1
12	0.036604	-0.0413514	-0.00214701	0.0809711	0.0172632	-0.0162663	-0.00994776	0.028687	0.00376388	0.0140872	0			12	0.0201349	0.0591316	0.0480946	0.0362056	0.0116052	1
12.2	-0.0092728	0.0201794	0.033437	0.0482016	0.0142227	0.0337957	0.06505	-0.0223041	0.0460874	-0.00231402	0			12.2	0.0125863	0.0539747	0.0312369	0.0272785	-0.00488026	1
12.4	-0.0141064	-0.0252192	0.00356108	-0.0211111	-0.0190497	0.0336553	0.053257	-0.0222921	0.0101929	-0.00825303	0			12.4	-0.00380522	0.0327262	0.0106448	0.0218272	0.00649252	1
12.6	0.0250732	0.0196752	0.0221864	-0.00908416	-0.0129896	-0.0145495	0.0363724	-0.00215852	0.00098495	-0.0156665	0			12.6	-0.025277	0.0292468	-0.0143765	0.0203312	-2.08206e-05	1
12.8	0.0205064	0.0452361	0.0502472	-0.00294316	0.0182722	-0.0276926	0.0172635	0.0155783	0.0365633	-0.00728784	0			12.8	-0.0181878	0.0369711	-0.00275757	-0.0251531	-0.0208716	1
13	-0.013012	-0.0568717	0.00313119	-0.0452969	0.0110232	0.0127629	-0.0176905	0.0146542	0.028623	-0.0160099	0			13	-0.0227665	0.00876179	0.00337471	-0.0105668	-0.018476	0
13.2	0.00412726	-0.0415659	-0.027657	-0.0244519	-0.0190118	0.0412583	-0.00124017	-0.00933125	-0.00603372	-0.0531961	0			13.2	-0.0199865	-0.00841461	-0.00480047	-0.00220092	-0.0249346	0
13.4	0.0172666	-0.0352871	0.0173333	-0.056804	-0.00525087	0.0285011	-0.0370956	0.01814	-0.0354765	-0.0156999	0			13.4	-0.0296172	0.0024685	-0.0220938	-0.0161526	-0.0297744	0
13.6	0.0120878	-0.00383716	0.0146445	-0.0337679	0.00888486	-0.0327719	-0.0265218	-0.0067729	-0.0122491	-0.0353032	0			13.6	-0.0374406	-0.00194466	-0.0303316	-0.027339	-0.0325252	0
13.8	0.000255045	0.0435233	-0.0174932	-0.0346003	-0.00591426	0.0157932	-0.0331619	-0.0107282	-0.0048108	-0.0145539	0			13.8	-0.0374358	-0.0199456	-0.027665	-0.018451	-0.0389758	0
14	0.00658393	0.0439794	-0.0437706	0.0266203	-0.0342088	0.034199	-0.0343907	0.0187078	-0.0176368	0.030158	0			14	-0.0218663	-0.0209687	-0.0194295	-0.0345983	-0.0342779	0
14.2	0.000330767	0.0242022	-0.0447134	0.0537202	-0.0126185	-0.0186241	-0.00657213	0.0124933	-0.0114609	0.0131481	0			14.2	-0.0298847	-0.0106207	-0.00614961	-0.0152837	-0.0274284	0
14.4	-0.0143604	0.0215765	-0.0187101	-0.0332338	0.0312708	-0.0125054	-0.00705705	-0.0284482	0.0132749	-0.00890843	0			14.4	-0.0308977	-0.0165068	-0.00798814	0.0127153	-0.0322989	0
14.6	0.0115498	-0.00508164	-0.00593066	0.00571833	0.00429691	-0.00399885	-0.0154578	-0.049033	0.0173526	0.041872	0			14.6	-0.0206191	-0.0150274	-0.0284207	-0.0137289	-0.0254806	0
14.8	-0.028833	-0.00772202	-0.0216031	0.0199119	0.0251512	-0.0213106	0.0509896	-0.0622517	-0.0192088	0.04505	0			14.8	-0.0169316	-0.0345698	-0.0343339	-0.0147741	-0.0297473	0
15	-0.0212221	-0.0208428	-0.0307213	-0.0107752	0.0249488	-0.0168904	0.0158561	0.0134613	0.0225549	0.0300523	0			15	-0.0146171	-0.00159285	-0.031587	-0.00868422	-0.025221	0
15.2	-0.00415976	0.0138682	-0.00214929	0.00491436	0.031709	-0.00820448	0.0133333	0.0221364	0.00852297	0.000699843	0			15.2	-0.0100796	0.00574567	-0.0174037	-0.0180431	-0.0154474	0
15.4	-0.0215942	0.0163134	0.0314393	0.0343491	0.0266394	-0.00915808	0.0583742	0.0177665	-0.0222821	-0.00257876	0			15.4	-0.00964741	-0.0117984	-0.000150269	-0.00991527	-0.0105303	0
15.6	-0.02263	-0.0125727	0.0290813	0.033307	0.00187315	-0.0158212	0.0453679	0.0127672	0.0104219	0.0205302	0			15.6	-0.0203622	-0.00101901	-0.00426049	-0.0333284	-0.00408371	0
15.8	0.00579041	0.0146808	0.00158229	0.00626305	0.00160817	-0.0223321	-0.0286277	-0.043905	0.0162954	-3.99165e-05	0			15.8	-0.00929016	-0.0122409	-0.0285374	-0.00996031	-0.00803562	0
16	-0.00492681	-0.0138548	-0.0218291	-0.055704	-0.0139722	-0.0060458	-0.092302	0.0353759	-0.0105818	-0.0476034	0			16	0.00714027	-0.00913152	-0.0194033	0.00182347	-0.0105854	0
16.2	-0.0132477	-0.0234035	-0.0383151	0.0133944	-0.0406541	0.0166542	0.0106423	-0.0154577	0.0127948	-0.0357545	0			16.2	0.0103557	-0.0107224	-0.00730324	0.00296972	-0.00963692	0
16.4	-0.00383493	-0.0697292	-0.0422325	0.0193788	-0.0147144	-0.0175846	-0.0173573	-0.0221845	0.0382424	-0.00842232	0			16.4	-0.0187084	-0.0162346	-0.000967401	-0.0134824	-0.011038	0
16.6	0.00604079	-0.0857086	-0.0198368	-0.0273731	-0.0195235	-0.038168	-0.0866718	-0.0092896	-0.0385232	-0.00736366	0			16.6	-0.0172579	-0.0285078	-0.00686861	-0.0261382	-0.0197501	0
16.8	0.00099407	-0.0172535	0.0303137	-0.0352727	-0.0422601	0.0186313	-0.043219	-0.0103743	-0.07472	-0.0155117	0			16.8	-0.020651	-0.027006	-0.0406701	-0.0269373	-0.0114165	0
17	0.0084126	0.0490155	0.059457	-0.0226397	-0.0133521	0.0573266	-0.00638127	0.0100514	0.000815072	-0.0187889	0			17	-0.0189242	-0.00904843	-0.0359058	-0.0127877	-0.00590567	0
17.2	0.0353321	0.04454	0.0431998	-0.012338	0.0105762	0.0140643	-0.0441904	0.00668417	-0.00686679	-0.0166607	0			17.2	-0.00392876	0.00424243	0.00444893	-0.00468543	-0.0164395	0
17.4	-0.00145342	0.0350575	0.0513163	0.0209358	0.00637921	0.0430421	0.00669078	0.010936	-0.0412651	0.0142423	0			17.4	0.00248942	0.00381733	0.00753485	-0.00696664	-0.017516	0
17.6	-0.0272501	-0.0113821	-0.0123602	0.0388768	0.0247426	0.0237854	-0.00469691	0.0248778	0.0121821	0.00752448	0			17.6	-0.00378131	0.0056236	-0.0140009	-0.00444796	-0.00700343	0
17.8	0.031883	0.0453562	-0.023576	0.01626	0.00300028	-0.00686724	0.0478075	0.00936523	0.0506508	0.0351569	0			17.8	0.0207149	-0.0207937	0.00713636	0.0161554	-0.00396452	0
18	0.0329799	0.0720269	0.0019042	0.00203706	-0.0231611	-0.0151249	0.0600116	0.00359214	0.028355	0.0399828	0			18	0.00482661	0.00388978	0.00622388	0.0165409	-0.010982	0
18.2	-0.0180771	0.00967566	0.00624193	0.00831368	-0.0048737	-0.00363418	0.0252639	0.0194426	-0.0181243	-0.00777284	0			18.2	0.00295418	0.0248178	-0.00330384	-0.00145018	-0.0176579	0
18.4	0.000381663	-0.000618958	-0.00369918	0.0153408	0.0179001	0.00832101	0.0537895	0.00550801	-0.028756	-0.0293605	0			18.4	0.00520819	0.0126253	0.00854749	0.000296837	-0.00508959	0
18.6	-0.000522291	0.0165606	-0.0304952	0.0285423	0.010392	-0.0123516	0.0237903	-0.0125308	0.0363808	-0.022704	0			18.6	-0.00208993	0.0117819	0.0145401	0.00265595	0.0110584	0
18.8	-0.0108555	0.0124516	0.0244321	-0.0170729	-0.013676	-0.00428973	0.0279889	0.0325605	0.0559203	-0.0163659	0			18.8	0.00443302	-0.00150356	-0.0156129	-0.017826	0.00553898	0
19	-0.00278542	-0.00125287	0.0295636	-0.0312146	-0.0189062	-0.00371063	0.00424853	-0.0324872	0.00130999	-0.0138231	0			19	-0.0104409	0.00139019	-0.0216852	0.00443366	0.0286789	0
19.2	-0.0218285	-0.0656607	-0.00637825	0.00572498	-0.00239161	-0.0309404	-0.0132641	-0.0362854	-0.0229446	0.00814419	0			19.2	0.00586605	-0.0107598	0.00814556	0.0265314	0.0145426	0
19.4	-0.0089289	-0.0772659	-0.0284988	-0.000130022	-0.000142581	-0.0297888	-0.023847	0.00251717	0.0117083	0.0183775	0			19.4	0.0139553	-0.00409382	0.00269554	0.0116324	0.0149169	0
19.6	0.0451731	-0.0213925	-0.000953745	-0.0265699	0.00367377	0.00788799	-0.0481939	-0.0180282	0.017845	0.0167506	0			19.6	0.0191493	-0.0100719	-0.00748504	-0.0113388	0.00847044	0
19.8	0.028875	-0.0119497	0.0469018	-0.00901647	0.036289	0.00622245	-0.0396663	-0.00127534	-0.015217	0.0173529	0			19.8	-0.00675153	-0.00661842	0.0104974	-0.011867	-0.00844041	0
20	-0.0204358	0.0177801	0.00286417	-0.0293896	0.0315968	-0.0309928	0.0142644	0.0376233	0.0110914	-0.0314854	0			20	-0.0245931	-2.19175e-05	-0.00884611	-0.0111957	0.00207799	0
20.2	0.0102695	-0.0192109	-0.0109102	0.092275	0.0161526	-0.00466455	0.0356676	0.0175901	-0.0154066	0.00723316	0
20.4	0.0237782	-0.033768	0.0303957	0.0713507	-0.0104694	0.00590022	0.0164372	0.00495668	-0.0095452	0.041531	0
20.6	-0.0143681	0.0288402	0.00904268	-0.0129067	-0.013712	0.0208722	0.0121261	0.0225107	-0.00321137	0.00252479	0
20.8	0.0030365	0.0598687	-0.0281884	-0.023135	-0.0111593	0.0370132	0.0374118	0.0237694	0.0107016	-0.0118013	0
21	0.0479101	0.0395188	0.0103775	-0.00771626	-0.0195202	0.016108	0.0380525	-0.00252294	0.0405035	0.0286681	0
21.2	-0.00431073	0.067574	0.0299364	0.00130375	0.00603843	0.0134772	-0.015641	-0.0118977	0.0227571	0.0199284	0
21.4	0.0119527	0.0272259	-0.00393357	-0.0385905	0.0197691	0.0441446	-0.0420943	-0.00427927	0.0581424	0.013441	0
21.6	-0.00199085	0.0216955	-0.0421712	-9.90246e-05	-0.0193822	0.018586	0.0317961	-0.0356029	-0.0076075	-0.0254074	0
21.8	-0.00813203	-3.28393e-05	-0.0875199	-0.0011167	-0.0165507	0.0137464	0.0378899	-0.0124509	-0.0199607	-0.0214734	0
22	0.00392248	0.00420192	-0.0592885	-0.0146873	0.00969187	-0.0156971	-0.024901	-0.00861101	-0.000650732	-0.00380016	0
22.2	-0.00189604	0.00360447	0.00788818	-0.00998167	0.00118165	-0.0374475	-0.0100536	-0.0235462	-0.0371835	-0.0152948	0
22.4	-0.00663609	-0.0526257	0.0292118	-0.0124479	-0.00737028	0.0113918	0.0374773	0.0181111	-0.0566742	-0.0354281	0
22.6	0.00539832	-0.0236263	0.0706257	0.0423389	0.0125118	-0.0141471	-0.0279761	0.00609485	-0.0266706	-0.0530422	0
22.8	-0.0270977	-0.0176876	0.0145193	-0.0058942	0.00777979	-0.0207999	-0.0104596	0.0190298	-0.00641813	0.0135979	0
23	-0.040564	0.00810431	-0.0135558	-0.016997	-0.0256544	-0.0548528	-0.0625374	-0.00813416	-0.0353491	0.0267809	0
23.2	-0.0171899	-0.0077982	-0.0248665	-0.0235637	-0.0181318	-0.0324768	-0.0593098	-0.00480609	-0.035723	-0.0173105	0
23.4	-0.0142525	-0.0441278	-0.0290288	0.00993993	-0.00183153	-0.0105247	0.0133883	0.00491048	-0.0268473	-0.0297334	0
23.6	-0.0247679	-0.0273076	-0.00354076	0.0394155	-0.00202417	-0.0230392	-0.00545856	-0.0268822	-0.00600008	0.0161791	0
23.8	0.00124025	0.00763767	0.0192155	-0.0341863	0.0182672	0.00588536	-0.048239	-0.0137964	0.0698308	0.0441037	0
24	0.00708831	0.0198562	0.0322066	0.00593224	0.00272475	-0.0301476	0.0563762	0.0358437	0.0458921	-0.00463834	0
24.2	0.0054134	0.0253517	0.0261173	-0.0427537	0.0172501	0.0191412	0.012299	-0.0130158	-0.0281262	0.0276394	0
24.4	-0.000348455	0.00248599	0.00294061	-0.024	0.0152865	0.0281706	-0.0117539	-0.0236622	-0.0235151	0.00722601	0
24.6	0.00150529	-0.0263467	-0.0112336	-0.0188349	-0.00825996	0.0139097	-0.000156894	-0.0329801	0.0385441	-0.00975773	0
24.8	0.00515882	-0.0384713	-0.015699	-0.0465213	-0.0256634	0.000971126	-0.0120777	-0.0104048	0.0343904	-0.0110673	0
25	0.00308511	-0.0156536	-0.0124683	-0.00367738	-0.019228	-0.0155876	-0.0289883	0.0537312	-0.00857077	-0.0280179	0
25.2	0.0161033	0.0252966	0.00517981	0.0173564	0.00545636	0.0198406	-0.0452189	0.00167461	0.0194111	0.0215212	0
25.4	0.0287524	-0.0222171	-0.0182254	0.0109902	-0.0106394	-0.00820168	0.0228165	0.01662	-0.0242294	-0.0139231	0
25.6	-0.0246167	0.0315466	-0.0434764	0.0144373	0.0011031	-0.0131939	0.0352507	0.0109268	0.01504	-0.0154163	0
25.8	-0.0411599	0.0129795	-0.0225544	0.0327079	0.0145716	-0.010519	0.0250006	-0.0185069	0.0251543	0.0395563	0
26	0.018792	-0.0547401	0.00477404	0.0557362	0.0119309	0.00168944	0.0180156	-0.0261033	0.00868587	0.0252315	0
26.2	0.0476977	-0.0416433	0.022904	0.0281953	0.0125326	0.0267634	0.0245512	0.0001596	0.018637	0.00297242	0
26.4	-0.000477131	0.0146386	0.031127	-0.0192769	0.0136041	0.0118723	0.0335832	0.0353641	0.000901273	0.0469886	0
26.6	-0.0222905	0.0587834	-0.0276504	0.0341211	0.00274163	-0.0301002	-0.0100617	0.0342389	-0.0248204	-0.0301509	0
26.8	-0.0309032	-0.0168818	-0.0379202	-0.0178935	-0.000627019	0.00548314	0.054291	0.00536216	-0.0427741	-0.0227657	0
27	-0.00315836	-0.00467589	0.0168729	-0.0324737	0.0116288	0.0249229	0.0239176	0.0121175	-0.0181485	0.0140377	0
27.2	0.0172574	-0.013842	0.0404987	-0.0383894	0.0161897	0.0144779	-0.000618249	0.00126299	-0.00311949	0.0145103	0
27.4	0.012775	-0.030354	0.0313277	-0.0205714	0.0115729	0.000758978	-0.000316622	-0.00745456	0.0114819	-0.0053603	0
27.6	0.0129077	0.0398466	0.034314	0.0251196	-0.00777738	0.00956342	-0.0259948	-0.0189819	0.0138984	-0.00922844	0
27.8	0.0194761	0.071512	0.0173906	0.00605801	-0.0382167	0.0323338	0.0111159	-0.0553184	-0.0179554	0.00226945	0
28	0.0140622	0.0370462	-0.0181805	0.0240329	-0.0120975	-0.00953377	0.00426448	0.0447516	0.0478005	-0.00963534	0
28.2	-0.00620344	-0.0461858	-0.0031844	-0.0358729	0.0016193	0.025521	-0.0858321	-0.00220635	0.00433989	-0.00919953	0
28.4	-0.0422615	-0.0599387	0.00755105	-0.0287359	-0.0149399	0.0133579	-0.068915	-0.0253019	0.0258468	-0.00476362	0
28.6	-0.0308545	-0.0299866	-0.000853025	0.00485911	-0.0117889	-0.0126767	-0.0160184	0.00823785	0.0444188	0.0208524	0
28.8	-0.0027001	-0.02109	-0.0204115	0.0090829	-0.0167894	-0.0209316	-0.034897	0.0130294	-0.0271852	0.0286882	0
29	-0.028226	-0.0228952	-0.0373012	0.012995	-0.0376816	-0.0307076	-0.0346546	0.0130037	-0.0660989	-0.0112643	0
29.2	-0.039031	-0.0118164	-0.0156631	-0.0140228	0.00991616	0.0201795	0.0288677	0.0229855	-0.0559842	-0.0239831	0
29.4	0.00359414	0.0372598	-0.000154256	0.0256466	0.0169533	-7.95465e-05	0.0239857	0.00458826	-0.0785757	-0.0232071	0
29.6	0.0275915	0.0711074	0.0177236	0.0396836	-0.0298451	-0.00536138	-0.0101996	-0.041928	0.00759843	-0.0118586	0
29.8	0.0277955	-0.00325496	-0.0102851	0.0019672	-0.0189217	0.00234885	0.00663765	0.0254539	0.0433099	-0.00688481	0
30	-0.0241241	-0.0155957	-0.00387567	-0.0357909	0.00597806	0.0138743	0.029896	0.0524126	0.00925385	-0.0114607	0
30.2	-0.0453585	0.0482815	0.0408182	-0.0359027	0.0132376	0.0210988	0.0139764	-0.0190562	-0.0034493	-0.00513402	0
30.4	0.0400365	-0.00233572	0.0062062	-0.00221264	0.0439857	-0.0163788	-0.000254327	-0.0218505	-0.0170951	0.0145252	0
30.6	0.0332315	-0.025194	-0.0289247	0.0340961	0.0190464	-0.0565852	0.00260692	-0.0445281	-0.0138192	0.0102934	0
30.8	-0.0315545	-0.00403595	-0.000330003	0.0297593	0.027761	0.00656049	0.0221972	0.00655895	0.0124326	-0.0163703	0
31	-0.0172572	-0.0296727	-0.0155366	0.0438095	-0.045031	-0.00285867	0.0275216	-0.0176514	0.000106062	0.0227872	0
31.2	0.0276795	-0.0406964	0.0141189	0.0189039	-0.0231992	-0.0256984	0.035063	-0.00878982	0.00693993	0.0156865	0
31.4	0.0351382	0.0155132	0.0511921	-0.0246416	0.0407552	0.000847761	0.0615252	0.0264908	0.0404177	-0.0288435	0
31.6	0.0152217	0.0554965	0.0158769	-0.0192331	0.00647233	0.0148726	0.0661304	0.0261787	0.0216225	-0.0154651	0
31.8	-0.0116144	0.0256058	0.00723157	-0.00760629	0.0175087	0.00832039	0.00327719	0.0516232	-0.0194711	0.00083965	0
32	-0.00624605	0.0291084	-0.0175528	-0.00166586	0.00880286	0.00277694	-0.0625423	-0.0442448	0.0338867	0.0125176	0
32.2	0.0269362	0.0442502	-0.0324706	-0.00452449	-0.00530975	0.0292495	-0.0051947	0.032181	0.0538671	0.0209939	0
32.4	0.0165766	0.0316751	-0.0202548	0.0495084	-0.00114282	0.0289701	-0.00487696	0.0379122	0.0671775	0.0501885	0
32.6	0.00754635	0.0121357	-0.0126213	0.00740629	0.0234473	0.00384971	-0.00666348	-0.00474	0.045988	0.03006	0
32.8	0.0209813	-0.0151349	-0.0183676	-0.0448243	0.0269084	-0.0172011	0.0108544	0.00184979	-0.0274854	-0.00592061	0
33	0.0015735	-0.0451027	0.00219345	0.0322322	-0.00408674	-0.0276681	-0.0528257	-0.0297879	-0.0517723	0.0087181	0
33.2	-0.0277446	-0.034098	0.0374679	-0.0116146	-0.00810887	-0.00921565	-0.0807751	-0.036807	0.00422338	-0.0155521	0
33.4	-0.0278866	-0.0579268	-0.00701924	-0.0139389	-0.00301908	0.0114306	-0.0503203	0.011605	-0.00574891	-0.00530567	0
33.6	-0.0308838	-0.0266232	-0.0185208	-0.0267838	-0.0343492	-0.0247883	0.00450563	-0.00482865	0.0150785	0.0194396	0
33.8	-0.0260765	0.0284812	-0.0329847	-0.0617633	-0.00174486	-0.0317423	0.00668796	-0.0647998	0.00258792	-0.0162615	0
34	-0.0222958	0.0151424	-0.0161591	-0.0137492	0.0293913	-0.00871934	-0.0116461	-0.0588924	-0.0335338	-0.0187477	0
34.2	-0.0244072	-0.0317541	0.0383194	0.0244371	-0.0242064	-0.00964148	-0.0122484	-0.0109824	-0.0381914	-0.00239525	0
34.4	-0.00667684	-0.028786	0.00786697	-0.0550449	-0.0475621	-0.0147983	-0.0316027	-0.0247561	-0.0420889	-0.0701053	0
34.6	0.00993719	-0.0184835	-0.0499423	0.00213615	0.00482343	-0.0173517	-0.0374196	-0.0438262	-0.0156928	-0.035693	0
34.8	-0.00127995	0.0215146	0.0196535	-0.00137997	0.0058878	-0.00526169	0.000560668	-0.00200822	0.0199588	-0.0148514	0
35	0.0013533	0.00319093	0.0245051	-0.0196543	-0.00966914	-0.00917807	0.0307974	0.0568331	-0.0231154	-0.00510179	0
35.2	0.0263858	-0.0296619	-0.0189647	0.0015804	-0.0105375	-0.0122999	9.90481e-05	0.0487637	-0.0431855	0.0416356	0
35.4	0.0244772	-0.0150944	-0.0359479	0.0209718	0.00732063	0.0084168	0.0147022	0.00653609	-0.0052271	0.0372111	0
35.6	0.00370349	0.0124349	-0.0261474	0.0102937	0.0161342	0.0389232	0.0745756	0.030229	0.0161752	-0.0269299	0
35.8	0.0127572	0.0160351	0.00528446	0.00448389	-0.00969972	0.0512435	0.0144446	0.054984	0.0250251	0.00227723	0
36	-0.019007	0.0103263	-0.0346613	0.0294925	0.0130229	0.0232856	-0.000150117	-0.0808014	0.0101377	0.0348609	0
36.2	-0.00869221	-0.00742063	0.0379438	0.0229126	0.0158272	-0.0251751	-0.0127341	-0.0435616	-0.0103408	0.0285602	0
36.4	0.00557474	-0.0216348	0.0428373	-0.00194067	0.0119344	0.00287618	0.0160756	0.0353096	0.0306658	0.0203106	0
36.6	-0.00861059	0.0208011	0.0160443	0.0187526	0.00573751	0.0187036	0.0191994	0.0454671	0.0504872	0.00080621	0
36.8	-0.0195333	0.0313194	0.0689477	0.0341447	-0.00751591	0.00519362	0.0141337	0.00855116	0.00959828	-0.0100412	0
37	-0.00198521	-0.019619	0.0660521	-0.00450865	-0.00834958	0.0328157	0.04887	-0.0341834	0.00751651	0.000185851	0
37.2	0.0200071	0.0494918	-0.0303428	0.00882713	0.00448894	0.00496677	-0.00942368	0.0143498	0.0387527	-0.0337746	0
37.4	0.000567199	0.0228329	0.0342193	0.0128641	0.0242311	0.00755795	0.00273438	0.0377107	-0.00302953	-0.00743346	0
37.6	0.00525033	0.0430241	0.0323225	0.000760818	-0.00313815	-0.0241042	-0.0211707	-0.0121018	-0.022273	0.0188587	0
37.8	0.0251248	-0.0131405	-0.0285846	-0.0522902	-0.0312018	-0.0138356	-0.0284185	0.0103853	-0.0220197	-0.0104305	0
38	0.028775	-0.0289363	-0.0574144	-0.0432776	-0.0127236	-0.0109835	-0.0243497	0.0195938	-0.0337695	-0.0322507	0
38.2	-0.00906816	0.0601469	-0.0415435	0.0144525	0.00992708	-0.0400412	-0.0533453	-0.0295158	-0.0329819	0.00706614	0
38.4	-0.0528243	0.00905317	0.00274799	-0.0209056	-0.00460355	-0.00135933	-0.0357545	0.00846551	-0.00722206	0.0286771	0
38.6	0.0188819	-0.0135891	-0.00722633	-0.00909987	-0.00805073	-0.00963793	0.0122071	-0.00585175	0.0068037	-0.0346468	0
38.8	0.047276	0.0596892	-0.0160266	-0.00605822	-0.0115976	0.0123917	-0.0320273	0.00589639	-0.0142602	-0.0259221	0
39	-0.0090964	-0.0069646	-0.00199827	0.0193834	0.0010167	-0.00627946	-0.00263219	-0.0709137	-0.018246	-0.00585721	0
39.2	-0.00271742	-0.0687022	0.010363	0.0507159	0.00933848	-0.032081	0.0231115	-0.0587656	-0.00128394	-0.0158133	0
39.4	0.0353054	-0.0455105	-0.000560631	0.0430669	-0.00300978	0.000619498	-0.000909155	0.0207313	0.0279496	-3.41897e-06	0
39.6	-0.0108233	-0.0312636	-0.00511845	0.000463979	-0.00135765	0.0559594	0.0195875	0.0232055	0.0462802	0.0300534	0
39.8	-0.0333454	0.0217289	0.0229803	-0.0257927	0.0223764	0.064994	0.0367541	0.0799282	0.0142375	-0.00322004	0
40	0.00901747	-0.0199644	0.00717878	0.0170029	-0.00689161	0.0106462	0.035047	0.0128433	0.0119054	-0.0141373	0
40.2	0.00448705	0.00509345	0.00142687	0.00604739	-0.0188372	-0.0108541	0.0593676	-0.0473553	0.0590226	0.0469363	0
40.4	0.0135491	0.00730941	0.0070859	-0.0398537	-0.00960452	-0.00229257	0.0392974	0.0510734	-0.0293041	0.0113545	0
40.6	0.0230201	-0.0293152	0.0195345	-0.0451949	-0.00069453	0.00376212	0.00392366	0.0591988	-0.0385833	-0.030853	0
40.8	0.00205905	-0.0189948	0.016363	0.0132069	-0.000160556	-0.017914	-0.0153581	-0.0435595	0.0459042	0.0165218	0
41	-0.00413818	0.00270358	-0.0349696	0.0545595	0.0135036	-0.0471139	-0.0332723	-0.0173154	-0.0332018	0.0281656	0
41.2	-0.0162949	-0.0201939	-0.0677705	-0.0095832	0.0554441	-0.0223866	-0.00132225	-0.0406512	-0.0426668	0.000546634	0
41.4	-0.0312924	0.00781223	0.00900113	-0.00246052	0.00453474	-0.0366403	-0.0452552	-0.023515	-0.0563057	-0.0159533	0
41.6	-0.0269655	-0.0393089	0.00282688	-0.0304402	-0.00549877	-0.0334098	-0.0595358	0.0191139	-0.0110601	-0.0356874	0
41.8	-0.0125098	-0.017296	-0.0438057	-0.0195128	0.010543	-0.00115868	-0.0442556	-0.0212282	0.0244967	-0.00697941	0
42	-0.0143366	0.0494837	-0.000949797	0.00468843	0.00167155	0.0238639	-0.0424219	-0.0261631	0.00796826	0.0231812	0
42.2	-0.007957	-0.00696476	0.0454658	-0.0255901	-0.0093751	0.0387912	-0.0231388	0.0297257	-0.0240866	0.0231641	0
42.4	0.0296583	-0.0582963	-0.0166172	-0.0123576	-0.0236604	0.0419009	0.0261288	-0.0183415	-0.0257025	0.0600505	0
42.6	0.0213593	0.0417807	-0.0205437	0.00131005	-0.0455872	0.00223323	0.0458544	0.0184214	0.0646435	0.0466104	0
42.8	0.0123161	-0.00547674	0.0153769	-0.00787833	-0.00540198	0.00870403	0.0580245	0.0238709	0.0176531	0.00613253	0
43	-0.0446954	0.0244303	0.0827057	0.00632811	0.0120433	0.00917362	0.0238059	0.0186471	-0.00364539	-0.0141878	0
43.2	-0.0331959	0.0696606	0.0431515	-0.0130895	0.0418265	0.00693409	0.00385039	-0.01149	0.0322661	0.000735167	0
43.4	0.0329287	0.011826	-0.0104332	-0.0127953	0.0407313	-0.00958506	0.040346	-0.0333144	-0.0258138	-0.0182519	0
43.6	0.0290491	-0.0207511	0.00655502	0.0421123	-0.0256274	-0.0453374	0.0574259	-0.00379956	-0.0906347	-0.0582885	0
43.8	0.0333442	-0.0068618	-0.0921743	0.00218356	0.00318268	-0.0155426	0.00614836	0.00419436	0.0334066	-0.00477766	0
44	0.0200112	-0.00764657	0.00993217	0.0204882	-0.00442661	0.00393372	-0.0321588	0.0386301	0.0337485	-0.0184463	0
44.2	-0.00895237	0.0140773	0.0214686	-0.00196938	-0.0119874	-0.00802584	0.0113025	-0.0161519	-0.0295497	-0.0404675	0
44.4	0.0117827	0.0179125	0.0249366	0.0150241	-0.00233764	-0.00893165	-0.0153578	-0.00647527	-0.026527	-0.0258075	0
44.6	0.0226008	0.00641739	0.0285036	0.0134576	-0.0200653	0.0119803	-0.0742773	0.0305056	0.0094874	-0.00125305	0
44.8	-0.0220172	-0.00421013	-0.010175	-0.0408473	-0.0285198	0.0323043	-0.0348626	-0.0209587	0.0235557	0.00859962	0
45	-0.0334833	-0.0247888	0.00113137	0.00736653	0.00228352	0.0266474	0.0285468	-0.0398064	0.0407204	0.0209852	0
45.2	0.00567926	-0.00513437	-0.0180055	0.0878909	-0.0326026	-0.00976294	0.0206458	0.0278118	0.0333646	0.0505391	0
45.4	0.00724936	0.0368099	-0.023167	-0.0140995	0.00320889	0.00441337	0.0507385	-0.0148865	-0.045926	0.0372285	0
45.6	0.00732485	0.0131879	-0.025135	0.0169516	0.0324413	0.00980733	0.0268298	0.00311116	0.0268439	-0.0155266	0
45.8	0.00817004	-0.00258903	0.00783582	0.0331108	0.013975	0.0201085	0.0176109	0.0146721	0.0456637	-0.0350689	0
46	0.00922896	0.0167035	0.00859758	-0.0405004	0.00889882	0.0379264	-0.00843837	-0.0159602	-0.0147855	-0.0044888	0
46.2	0.0213911	0.0125881	-0.0300681	-0.0347561	0.0220184	0.0424008	-0.0318258	0.0174693	0.0139094	0.0111461	0
46.4	0.0133235	-0.0123831	0.00961488	0.00587847	0.00362159	0.039601	0.0657608	0.0548877	0.0338483	-0.00946112	0
46.6	-0.0192099	-0.0385953	0.00319135	0.0293609	0.0104679	-0.0157194	-0.0206424	-0.00263231	0.0512734	0.00536373	0
46.8	0.00823684	0.0138231	0.00451007	-0.0219589	0.00970664	-0.0191201	-0.011835	0.00765937	-0.00322646	-0.00071378	0
47	-0.00474997	-0.00162262	0.00183267	-0.0162715	0.00939059	-0.0306251	-0.0392873	-0.000590817	-0.029621	-0.0021302	0
47.2	-0.0265019	-0.0139062	0.0254306	0.00124722	-0.0076134	-0.0452598	-0.0690224	-0.0384629	-0.0164978	0.0100774	0
47.4	-0.0268334	-0.0133534	0.0447354	-0.0315796	0.0169085	-0.0235427	-0.0157707	-0.0134925	-0.030948	0.0197015	0
47.6	-0.0403461	-0.0413064	0.00572136	-0.0182809	0.0663922	-0.0122933	0.0153222	0.0418249	-0.0403862	0.0262325	0
47.8	0.00170954	0.0570583	-0.0110649	0.0492131	-0.0174088	-0.037263	0.00670601	0.0224195	0.00144245	0.0190057	0
48	0.0371297	0.0129418	-0.0177489	0.0213991	-0.0103125	-0.0163688	-0.00946526	0.008051	-0.0328251	-0.00671955	0
48.2	0.000350823	-0.00116958	0.0159616	-0.0165269	-0.0321594	0.0357496	0.00490554	0.0436567	-0.0141516	-0.00444593	0
48.4	-0.0198972	0.0204624	0.0218379	-0.0396774	-0.020948	0.0137311	-0.00338635	0.00117937	-0.0173398	-0.00885093	0
48.6	-0.00971725	-0.00136584	-0.0320921	-0.0170179	-0.00725325	-0.00899964	0.00737896	-0.0617818	-0.0265459	-0.0235204	0
48.8	-0.00532038	-0.016971	-0.0570716	0.00962837	-0.020577	0.00623255	0.0270325	-0.0258846	0.0229665	0.000486871	0
49	0.0218037	0.00683752	-0.0127575	-0.0101853	0.00913074	-0.022415	-0.0165702	-0.00621176	0.0302753	0.0240388	0
49.2	0.0393172	-0.0197922	-0.0174841	0.0586952	-0.0321344	0.00831082	0.00654133	-0.0815121	-0.0192591	-0.0380749	0
49.4	-0.0163546	0.00270382	-0.0362871	0.0152048	0.00883817	0.0158381	0.00678314	0.0169031	0.0328536	-0.00356698	0
49.6	-0.0112818	-0.023193	-0.00664174	-0.0411217	-0.000400318	-0.00923359	-0.0108536	0.0178951	0.0303352	0.0106474	0
49.8	-0.01133	-0.0531849	0.0200967	0.00384639	-0.0223545	-0.00455989	0.011677	-0.00915704	0.0200937	-0.00109692	0
50	-0.0711926	-0.0351513	0.000946325	0.0387817	-0.0315153	-0.0054919	-0.00277859	-0.0162718	0.0187994	-0.00202743	0
50.2	-0.0506061	-0.0144805	-0.017136	-0.00511518	-0.0488517	-0.0269771	-0.0496201	-0.0574032	-0.0305969	-0.01555	0
50.4	0.0630277	0.00283833	0.010425	-0.00474759	0.00118815	0.00920278	0.00628983	-0.00254729	-0.0421274	-0.0261337	0
50.6	0.0151554	0.0297591	0.0426695	-0.00963125	0.00792588	-0.00125678	-0.0149483	-0.0175023	-0.0535952	-0.0363897	0
50.8	0.0374078	0.0868011	0.0164063	-0.0295877	0.00541599	-0.0197902	0.0198346	0.0147217	-0.028067	-0.0069895	0
51	0.0142171	0.0126659	-0.0122391	0.00566517	-0.00538538	0.00603293	0.00593183	0.0617404	0.00634353	0.00517049	0
51.2	-0.0161791	-0.0231989	0.0183037	0.0190731	-0.00054337	0.00985354	-0.0300782	0.0541219	-0.00346861	-0.00435757	0
51.4	0.0154436	0.0165209	0.0333687	-0.0123643	0.0320699	-0.0119215	0.0109797	0.0177243	-0.0212787	-0.014012	0
51.6	0.00863611	-0.0124954	-0.00873472	0.000651252	0.0321648	-0.000518413	0.0479204	-0.00498118	0.022681	-0.0140969	0
51.8	-0.0019234	0.061986	0.00899946	-8.14156e-05	-0.0101847	-0.0162464	0.00370528	-0.0148962	0.0653115	0.0276589	0
52	-0.00936136	0.0032479	-0.0244521	-0.0470588	0.0422369	-0.0193509	-0.0049443	0.0142639	-0.00363754	0.0412482	0
52.2	-0.00412659	-0.0180931	-0.0544533	-0.0267695	0.0407988	0.0354265	0.0127855	0.01003	4.09286e-05	0.041049	0
52.4	0.0107134	0.00202652	0.00164567	0.029878	-0.00742302	0.0734887	0.0428296	0.0238568	0.0162187	0.0303598	0
52.6	0.015441	-0.0135857	0.0539958	0.0394521	0.0170132	0.0497621	0.0300011	0.0344749	-0.000361606	0.00333819	0
52.8	0.0104936	-0.0337533	0.0336929	0.0309065	0.04982	-0.00406665	-0.00359366	-0.00202468	0.0286079	-0.0085348	0
53	0.00460419	-0.0312345	0.00707886	0.0334852	-0.0149576	-0.0379726	0.00856207	-0.020067	0.0642556	0.0193618	0
53.2	-0.0186249	-0.0431838	-0.0334712	-0.0215119	-0.0104188	-0.01268	-0.0421313	-0.0113756	0.0116159	0.0333722	0
53.4	0.00428699	-0.01433	0.0122321	0.0503852	-0.0282693	-0.0178164	-0.00782622	0.0246707	0.0109229	0.00294108	0
53.6	0.0120983	0.0165378	0.0555679	0.0165028	-0.0483818	-0.0121244	0.00712211	-0.0304597	-0.0114405	-0.0339883	0
53.8	0.000703902	0.0380398	0.0345458	-0.036037	-0.0426951	0.00472852	-0.0439543	-0.0249346	-0.0206608	-0.012327	0
54	0.00160657	0.0404942	0.011797	-0.0277958	-0.0108606	0.00639496	-0.0474015	0.0443021	-0.00510852	0.00823977	0
54.2	0.00122481	-0.0120452	0.0176458	-0.0269749	0.0198544	-0.00120793	0.00912405	-0.0034619	-0.0133078	-0.0177963	0
54.4	-0.0110999	-0.0591547	-0.00306832	0.0310054	0.00352533	-0.00928919	-0.00617043	-0.0505287	-0.0053948	0.00405846	0
54.6	-0.00938351	0.0345329	-0.00314368	-0.0216837	-0.0143341	0.00655625	-0.019265	0.0376212	-0.0368731	0.00431946	0
54.8	-0.00607492	0.035618	0.00285566	-0.00667467	-0.0208411	0.0216241	0.0370764	-0.037466	-0.011837	-0.0123871	0
55	-0.00478703	-0.00630554	-0.0215872	0.0207303	0.0186658	4.95909e-05	0.0649581	-0.0487063	-0.0224708	-0.00675429	0
55.2	-0.0164575	-0.0236745	-0.0566091	0.0420517	0.0220929	-0.00828141	-0.00454777	0.0244664	0.00887841	0.00928235	0
55.4	-0.0374971	-0.0306507	-0.0514301	0.0383166	-0.0232513	-0.00210366	-0.00945413	0.00834179	0.047565	0.00286832	0
55.6	-0.0393542	-0.0345573	-0.0182644	-0.0346715	1.21581e-05	-0.0271244	0.0616692	-0.0238348	-0.0171938	-0.0116106	0
55.8	-0.00814564	-0.0395244	-0.0143487	-0.0253051	0.0433334	-0.00603164	-0.0874433	0.00747679	0.0346577	0.00318072	0
56	0.0466075	0.0907888	0.01928	0.016472	-0.0220389	0.0375997	-0.00972703	0.0265946	-0.0754395	0.0152236	0
56.2	0.0451186	0.105705	0.0289422	0.0258134	-0.0219904	-0.0144932	0.0612411	0.0428504	-0.0904742	-0.00652464	0
56.4	-0.000595586	0.0228667	0.0207742	-0.0047803	0.0128698	0.00760707	0.00666387	0.0440475	0.0745579	-0.0158808	0
56.6	-0.0150353	0.00453871	0.0100652	0.00140452	0.00465147	0.058645	0.00261223	0.0130746	0.0860104	-0.0235501	0
56.8	0.0189414	-0.00119872	-0.0012405	0.0194215	0.00103815	0.011144	0.0487574	-0.0187556	-0.0406557	-0.0525437	0
57	0.0315252	-0.051205	0.016321	-0.0358261	0.0167675	0.00590691	-0.0115964	-0.00737175	0.042193	-0.0470631	0
57.2	-0.0175785	0.0542751	0.0500714	0.00170383	-0.0110658	0.00184916	-0.0225404	0.0237603	-0.00674625	-0.0140367	0
57.4	-0.018973	0.0379095	0.0544586	0.048721	-0.0170326	-0.0192736	-0.0271531	-0.0018936	-0.0282678	-0.0151176	0
57.6	0.02866	0.0348056	0.0437507	0.0387161	-0.00303935	0.0402107	-0.00497331	0.0840735	-0.00183773	-0.0229048	0
57.8	0.0192739	0.0310146	0.0358698	-0.00243231	0.00798817	0.0398798	0.00294859	0.0741582	0.0271154	-0.0107744	0
58	-0.0352854	-0.0200348	0.0361933	-0.0150295	0.0328007	-0.0280224	-0.0257601	-0.0378789	0.0535269	0.0166901	0
58.2	-0.0236861	-0.0234039	0.040207	0.0181153	0.0558571	0.00305145	-0.00571675	-0.00355856	0.0612493	0.015572	0
58.4	0.0316181	0.00893079	0.0461585	0.0456847	0.0280331	0.0431423	0.0736455	0.0272135	0.0308431	-0.0394127	0
58.6	0.0328769	0.0790681	0.0898737	0.0276365	0.0307312	0.0177333	0.0486468	0.0409463	0.00515706	-0.0244168	0
58.8	0.052835	0.0860665	0.104642	0.0305602	0.0214891	0.0204849	0.0571961	0.0338002	-0.000470932	-0.0194203	0
59	0.0425665	0.0746667	0.0633683	0.0190009	0.0400271	0.0544232	0.0961082	0.0597929	-0.0310827	-0.00848766	0
59.2	0.0496415	0.0732373	0.0503353	0.0122858	0.0426848	0.0498794	0.0662477	0.0886652	-0.0212442	0.0103412	0
59.4	0.0684034	0.0630285	0.0695583	0.0302796	0.0025373	0.0327248	0.00303154	0.0754824	0.0521261	0.0196476	0
59.6	0.0183951	0.0716198	0.0596803	0.0261915	0.00274506	0.0461569	0.0122308	0.0770117	0.0574955	0.0120151	0
59.8	0.0467346	0.105503	0.0919617	0.0244984	0.0253259	0.011578	0.0450495	0.106652	-0.00240174	-0.0430492	0
60	0.0637073	0.0938756	0.068055	0.0145956	0.0403993	0.0566314	0.0418877	0.0589346	0.0829585	0.0266919	1
60.2	0.116706	0.0852744	0.0872391	0.0704239	0.106719	0.133137	0.134143	0.195998	0.152622	0.0723029	1
60.4	0.16276	0.121008	0.120891	0.0882969	0.117264	0.125847	0.251476	0.263016	0.128618	0.0753853	1
60.6	0.168192	0.124929	0.118123	0.071668	0.116674	0.0966471	0.245233	0.189438	0.10887	0.0851625	1
60.8	0.160407	0.0792464	0.123315	0.0887478	0.166895	0.111574	0.139016	0.171525	0.115947	0.101094	1
61	0.142096	0.0765715	0.134794	0.0589227	0.131493	0.0779385	0.0891891	0.106918	0.0936005	0.113191	1
61.2	0.138527	0.0599377	0.0869345	0.0351096	0.106085	0.0355598	0.14297	0.0555507	0.117268	0.0608728	1
61.4	0.0798082	0.105249	0.0698721	0.0345041	0.00112688	0.0157418	0.0737007	0.083718	0.0754571	0.0916724	1
61.6	0.0285456	0.0714186	0.0577272	0.0401112	0.0224979	-2.09807e-06	0.0569883	0.103966	0.0512947	0.0820066	1
61.8	0.0158644	0.0138004	0.0215965	0.0254268	0.0370878	-0.0380552	0.0793664	0.0682324	0.00579244	0.0254419	1
62	-0.00835775	0.0153282	-0.0145993	-0.0259996	-0.0278159	-0.0512983	0.0606257	0.0279457	-0.0153977	0.0100977	1
62.2	-0.0511179	-0.012986	-0.0356719	-0.0726574	-0.0110065	-0.0186404	0.0364125	0.0177951	0.0475882	0.0212255	1
62.4	-0.0509191	-0.0660205	-0.0418073	-0.0387155	-0.0266828	-0.0417388	-0.0395962	-0.00590119	-0.00392663	0.0294673	1
62.6	-0.0221718	-0.0541741	-0.0213073	0.00878933	-0.0293511	-0.0888232	-0.00204626	-0.0551603	0.00735628	0.0238489	1
62.8	0.00355273	-0.0584632	-0.0515884	-0.0586606	-0.0351924	-0.0702823	0.0510081	-0.0246888	-0.0603392	0.0153171	1
63	-0.0319799	-0.0380955	-0.0488454	-0.0591627	-0.0451284	-0.0110556	-0.0159048	0.0229462	-0.097198	-0.0217644	0
63.2	-0.0619359	-0.0417526	-0.010269	-0.0248393	-0.0385018	-0.0367705	-0.0574495	0.00088661	-0.0616642	-0.037992	0
63.4	-0.0482043	-0.0766906	-0.0217913	-0.0836716	-0.0428852	-0.0720168	-0.0301884	-0.0496543	-0.0517951	-0.00997805	0
63.6	-0.0542748	-0.0694876	-0.0625606	-0.103774	-0.0810325	-0.00199403	-0.0725607	-0.0575356	-0.0537271	-0.0131459	0
63.8	-0.0182158	-0.153329	-0.0618887	-0.0558866	-0.0788632	-0.0649611	-0.0161412	-0.0467878	-0.041685	-0.0387337	0
64	0.00572634	-0.1144	-0.024189	-0.105734	-0.0658839	-0.0286314	-0.0309379	-0.032433	-0.0398542	-0.0472762	0
64.2	-0.0328561	-0.0452517	-0.0453056	-0.125483	-0.0469239	-0.00976066	-0.0491755	-0.0483774	0.0216734	-0.0667348	0
64.4	-0.0362434	-0.0332436	-0.0473683	-0.0835648	-0.0407307	-0.032015	-0.0400172	-0.0202215	-0.0226469	-0.0586532	0
64.6	0.00371049	-0.0609788	-0.0266862	-0.0662031	-0.0688045	-0.00509145	-0.0395063	-0.00163	-0.0466078	-0.0326414	0
64.8	0.00450894	-0.0670047	-0.071441	-0.0817725	-0.0871132	0.0323562	-0.0178184	-0.0600001	0.0543893	-0.0309537	0
65	-0.00360669	-0.0179383	-0.101262	-0.0824485	-0.0415285	-0.00741233	0.0357305	-0.070512	-0.0243343	-0.024577	0
65.2	-0.00191161	-0.0355898	-0.045014	-0.0838896	-0.0185031	-0.0435526	0.00585115	-0.0685044	-0.000126277	-0.0364641	0
65.4	-0.00618098	-0.0845341	-0.0372094	-0.0496358	-0.0453803	-0.0126926	-0.0254614	-0.00960728	-0.0278391	-0.00168858	0
65.6	-0.0219491	-0.0791557	-0.0353148	-0.013375	-0.0542059	0.000913885	-0.0107425	-0.0117688	-0.0602438	0.00219395	0
65.8	-0.0399232	-0.0339777	-0.0365541	-0.0461789	-0.0357767	-0.00318788	-0.0292586	-0.049334	-0.0554837	-0.0187545	0
66	-0.0186816	0.00175677	-0.0337582	-0.0744155	-0.0444498	0.0283756	-0.0559068	-0.0434664	-0.0372496	-0.0114671	0
66.2	0.0170044	0.00926187	0.00861189	-0.0298519	-0.0640014	0.0271792	-0.00485361	-0.0347615	-0.0101438	-0.00715965	0
66.4	-0.0338151	-0.0177684	0.00211903	-0.0416822	-0.0276001	-0.0563563	0.0101621	-0.0336488	-0.0215314	-0.0236623	0
66.6	-0.0306153	-0.0133105	-0.0104488	0.00375315	-0.031691	0.00546829	-0.0296251	-0.0297391	-0.0264029	-0.0247475	0
66.8	-0.0327463	-0.0497105	-0.0291806	-0.0129863	-0.00953703	-0.0271748	-0.0510012	-0.053098	-0.00410247	-0.0212793	0
67	-0.0225979	-0.0659356	0.014112	-0.0580015	0.00198331	-0.0328176	0.00735949	-0.0515465	0.00868668	0.0104707	0
67.2	0.00472715	-0.0313086	0.0131961	-0.0375759	-0.00802523	0.0278569	0.0188178	-0.00224104	0.0101557	-0.00763163	0
67.4	0.0034962	-0.00499082	-0.05765	0.00858283	-0.0126138	-0.00895357	-0.0346114	0.0152867	-0.00233503	-0.0666352	0
67.6	0.015992	0.00810533	-0.0149281	0.00657175	-0.0238763	-0.0708222	0.00177429	-0.0187221	-0.0205494	-0.028213	0
67.8	0.0856113	0.0369998	0.0118145	-0.000575905	0.00567563	-0.0135823	-0.0133927	0.0250618	0.0417487	-0.0112408	0
68	0.0131332	0.0440865	-0.0230985	-0.00126221	0.00184324	-0.00217462	-0.0215527	0.0425654	0.00556806	-0.0138364	0
68.2	-0.026639	-0.00648054	-0.0370551	-0.0364088	-0.0380897	0.00519433	0.0186161	-0.00177474	-0.0140024	-0.0312354	0
68.4	-0.0115076	0.0018121	0.0268189	0.0141855	0.000364776	0.0139638	0.0239451	0.0126808	-0.00410662	-0.00711415	0
68.6	-0.0142528	0.0439601	0.035022	0.0575855	0.0339542	-0.00649222	0.0265492	0.0716052	-0.0059732	0.0365713	0
68.8	-0.0222923	0.0200757	-0.0563461	-0.00717622	-0.00061061	-0.0222264	0.0565668	0.0419551	0.0163972	0.0333841	0
69	-0.0308805	0.00724274	-0.0377136	0.0457477	0.0652177	-0.0111211	-0.00763998	-0.0275287	0.0367286	0.0236538	0
69.2	0.0284433	-0.0588297	-0.00449443	0.0273124	0.0109504	0.00604596	-0.0115084	-0.0227223	0.0174159	0.0136567	0
69.4	0.0520625	-0.0142327	0.00825652	-0.0164492	0.0270571	0.0146887	-0.0445456	-0.0367175	0.0276248	0.0224741	0
69.6	0.0312885	0.0196039	0.000777225	0.00497725	0.0356486	0.0261393	-0.0440627	-0.0291784	-0.016753	0.0090287	0
69.8	-0.00245692	0.0184226	-0.0138716	0.027369	0.0017583	0.036884	0.0282592	-0.0274112	-0.0508563	0.00285736	0
70	-0.0215148	0.0160934	-0.00996241	0.0084841	0.00591797	0.0299843	0.040829	-0.0129646	-0.0137816	0.025147	0
70.2	-0.011945	-0.00761565	0.0219675	-0.00178922	0.0218587	0.0136261	-0.0402764	0.0629894	-0.00947717	0.0269311	0
70.4	-0.013723	0.0469014	0.0406989	-0.0208574	0.00648676	0.00276479	-0.0296401	0.0280727	-0.0276997	0.0190849	0
70.6	-0.0103027	0.00881218	0.00445581	0.00768484	0.00116636	-0.0416379	-0.037179	0.00132075	-0.0314522	0.00637908	0
70.8	0.0310448	0.0220333	0.0397286	-0.0184597	-0.0406768	-0.0228032	-0.00800945	0.014184	-0.00498639	-0.0100018	0
71	0.00525109	-0.000874725	0.0119873	-0.00920506	-0.0285805	0.0126622	0.0211895	0.0128154	0.0105236	-0.00605257	0
71.2	-0.0332022	-0.0534017	-0.0219994	0.00717686	0.011374	0.00259964	0.0320632	-0.00602746	-0.0121447	-0.0113705	0
71.4	0.00411266	-0.0288766	0.0271996	-0.0470035	0.00138206	-0.0164578	0.0118816	-0.00239276	-0.0269582	-0.0346371	0
71.6	0.000516504	-0.0205486	-0.00876938	-0.0358285	0.00829706	-0.021904	-0.0508527	0.0201644	0.00735435	-0.0220353	0
71.8	-0.0270945	-0.0226858	0.00761991	0.0282162	-0.00654166	-0.0317195	0.0161134	0.0131287	0.0338988	-0.0147506	0
72	-0.00113027	-0.00578344	-0.0269777	0.0263773	-0.00937754	0.0166525	-0.0354612	-0.0560234	0.0733762	0.0103923	0
72.2	-0.00835608	0.0186588	-0.0206629	0.0153903	0.0206696	0.0256451	0.0165027	-0.00594547	0.0651443	0.0203503	0
72.4	-0.000823852	0.0423748	0.00341309	0.0473111	0.0316276	-0.0126744	0.0914061	0.0300172	0.0469562	0.00692874	0
72.6	0.0203658	0.0247667	-0.0424275	0.0214801	0.0138618	-0.0135422	0.0342415	-0.0271273	0.0292761	0.00229632	0
72.8	-0.0132642	-0.0154696	-0.0349557	-0.0408545	0.0171872	0.0175664	-0.0230626	-0.0191651	-0.0187602	0.0279818	0
73	-0.00211525	0.033149	0.10903	0.0535708	0.0142774	0.00986815	-0.0181299	0.0110636	-0.0304184	0.0573073	0
73.2	0.00871149	0.0537076	0.0125241	0.0477	-0.0526727	0.00886559	0.0315196	0.00403116	-0.0491027	0.0160999	0
73.4	-0.00132837	-0.00824479	-0.0108416	0.0115443	-0.0173342	0.00167733	0.0117533	0.0291593	-0.00684796	-0.0366857	0
73.6	-0.00190656	-0.0202433	0.0280446	0.00955933	0.0232545	0.0202988	-0.0454805	0.0168288	-0.0253697	0.0174109	0
73.8	-0.00490034	-0.000894196	0.0316335	0.00496134	0.0234657	0.0324387	-0.020309	-0.0383865	-0.00448432	0.0441204	0
74	0.00281276	0.018132	0.00199904	-0.0201882	0.0242679	0.0100371	0.0385099	-0.0390437	0.0557786	-0.0157138	0
74.2	0.0285581	0.0529423	-0.0455713	-0.0389608	-0.00947798	0.00295132	0.00446328	0.00691577	-0.0352886	-0.00188396	0
74.4	-0.029928	-0.0515694	-0.0138345	-0.0488598	-0.0313562	-0.00122167	-0.0149804	-0.00212863	-0.0255656	0.00105799	0
74.6	-0.0334024	-0.0246089	-0.0444179	-0.0405734	0.00805229	-0.0263298	-0.0157179	0.0118023	0.01626	-0.0105519	0
74.8	0.0179382	-0.0211528	-0.00921814	-0.000551003	0.00582587	-0.00663657	-0.0275755	0.0011812	-0.00544445	-0.000535076	0
75	-0.00191239	-0.0420284	-0.00272283	0.0162347	0.00135291	-0.00698129	-0.024849	0.00252144	-0.0145453	0.00874833	0
75.2	-0.0319296	0.01445	-0.0166088	-0.0274018	0.0113507	-0.0395822	0.00194937	0.0212639	0.0243395	-0.0187942	0
75.4	0.0205992	0.0406643	0.0383353	-0.0463987	-0.00186817	-0.0229158	0.0349115	0.0111027	0.030285	-0.0463598	0
75.6	0.0382701	-0.0373392	0.0304241	0.010703	0.000538116	0.0198345	0.0658955	-0.00467653	-0.000305455	-0.0144725	0
75.8	0.0260076	0.0241766	0.0272113	-0.0157617	-0.0166715	0.0140167	0.0449836	-0.0281253	0.0301787	0.0172681	0
76	0.024737	-0.0112734	0.0353385	0.0495901	-0.0104519	-0.01138	-0.0293837	0.00304207	0.0229938	0.0015039	0
76.2	0.0551308	0.00763772	0.0270323	0.0366848	-0.0122361	0.011416	-0.0165276	0.0115706	-0.0094643	-0.00646225	0
76.4	0.0336176	0.0460262	-0.00744235	-0.00604155	-0.0194977	0.0392249	0.0190077	-0.00543055	-0.000254334	0.00528069	0
76.6	0.000973559	0.0280525	-0.0124364	0.029345	0.0035464	0.0340545	0.0316302	3.46009e-05	-0.0022801	0.00702141	0
76.8	0.033511	0.0274857	0.0352427	0.0226391	0.0252037	0.0378602	0.0652534	0.0137637	-0.0385439	-0.00516606	0
77	-0.00588236	-0.0303613	0.040846	-0.0214129	-0.00770184	0.0385476	0.00907208	0.0302528	-0.00856265	-0.010928	0
77.2	-0.0119113	-0.0110709	0.00875628	0.0186298	-0.0114136	-0.00691704	-0.0204542	0.0575869	-0.0934396	0.0263311	0
77.4	-0.00789769	-0.0497464	-0.0512306	-0.00373345	0.0228904	0.0178718	-0.0244834	-0.0104395	-0.0494336	0.00871486	0
77.6	0.0162017	-0.0368052	-0.0740994	-0.025284	0.0159252	0.0158827	-0.0246002	-0.011952	0.0139256	-0.00834276	0
77.8	-0.0103734	0.00584253	-0.0188162	-0.00622066	-0.0103029	-0.00729617	-0.00973373	-0.0102391	0.0411837	-0.00828644	0
78	-0.0582212	-0.0105575	0.0379678	0.0058095	0.0203079	0.0154096	-0.0197045	-0.0469597	0.0710292	-0.00856379	0
78.2	-0.00130485	-0.00649607	0.00861526	0.0131089	0.0419575	-0.00303632	-0.0599161	0.0305095	0.0133018	0.020828	0
78.4	-0.0115428	-0.0303962	-0.0259413	-0.0170231	-0.0489422	-0.0535747	0.00586632	-0.0175377	-0.0190722	0.00654095	0
78.6	-0.0256576	0.0389269	-0.00980439	0.0109197	-0.0405941	-0.0598373	0.000266971	0.0232683	0.00719574	-0.00668912	0
78.8	-0.0265081	0.0377066	-0.0179888	0.00505271	-0.00226654	-0.0251659	-0.00936436	-0.0139559	0.033205	-0.0106747	0
79	0.00691222	-0.0174564	-0.0182731	-0.0445042	-0.00724768	0.0107366	0.0442101	-0.059748	7.67828e-06	-0.00851554	0
79.2	-0.00443907	0.00159576	0.0118143	-0.0268748	0.00407583	0.0111529	0.0319299	-0.0156189	0.0131058	0.00823294	0
79.4	-0.0422461	0.0680177	0.0293124	0.0524364	0.040048	-0.0146206	-0.0444156	0.0178151	0.0604515	0.00964185	0
79.6	0.0645904	0.0807541	0.0381091	0.0476126	0.0211168	-0.013745	0.0135296	0.0236886	-0.044809	-0.0404429	0
79.8	0.0598602	0.0423594	0.0164222	-0.00879439	0.0115179	-0.00392527	0.00473581	0.014737	-0.0209721	-0.0534738	0
80	-0.0241476	0.00207579	0.0048476	-0.00777704	0.0106274	-0.0412771	-0.026233	-0.0282448	-0.039054	-0.0128403	0
80.2	-0.00074727	-0.0417779	0.0227597	-0.00719347	-0.000290473	-0.0487578	-0.042212	0.00676143	-0.100467	0.0349894	0
80.4	0.0330311	-0.0389287	0.0228574	-0.00642141	0.00135522	0.00121407	-0.0419625	0.00385927	-0.0608757	0.0220432	0
80.6	-0.0109216	-0.0334298	-0.027475	0.00903863	-0.00297029	0.0211462	-0.0385064	-0.0359581	0.0352345	-0.0222879	0
80.8	-0.0201517	-0.0781602	-0.0712964	-0.0213286	-0.0315358	-0.0217172	-0.0336078	0.0215164	0.0410515	-0.00824088	0
81	-0.0253849	-0.0203742	-0.0428052	-0.0613177	-0.0171364	-0.019662	0.00102155	-0.0383232	0.0236081	0.0332767	0
81.2	-0.038774	0.00206377	-0.00706677	-0.00516728	-0.045794	0.0405767	0.00553995	-0.0593285	0.0379043	0.0350542	0
81.4	-0.0130734	0.0190539	0.0293617	0.0635143	-0.0206208	0.0332686	0.0211697	0.0160585	0.0055702	0.00391199	0
81.6	-0.0248201	0.035835	0.0120627	0.0163674	0.0369747	0.0180243	0.0309966	0.0481763	0.00323525	-0.00194382	0
81.8	-0.0078176	0.000936257	-0.0263456	-0.0405853	0.0273091	0.028982	0.0212457	0.026179	0.00529615	0.00671039	0
82	0.0418142	-0.0448345	-0.0295352	-0.0228194	-0.00792159	0.0128656	0.00365442	0.0054778	-0.00629869	0.00855913	0
82.2	-0.0313503	-0.0221942	-0.0223951	-0.0189756	0.0133007	-0.0153102	-0.0135947	-0.0394138	0.0500814	0.0298142	0
82.4	-0.0257458	-0.00914495	0.022769	0.0572549	-0.0139933	-0.0366007	0.00768429	-0.0158065	-0.00949607	0.0221341	0
82.6	0.001512	0.0175597	0.00433362	0.00385632	0.0270936	-0.045693	-0.0185224	0.000953913	-0.0163962	-0.016077	0
82.8	0.0174854	-0.00136215	0.0117304	0.00482503	0.0224198	-0.0117922	-0.0115559	-0.0103362	-0.00708697	-0.0120526	0
83	0.00983425	-0.0359716	0.024841	0.027138	-0.00440915	0.0068344	0.025764	0.0159045	0.0357407	0.00303039	0
83.2	-0.0149836	-0.015844	-0.0245171	0.0154999	-0.0151696	-0.0173381	0.0105123	0.0339593	0.0242235	-0.012756	0
83.4	-0.0318976	0.0228267	-0.0656492	0.0307932	-0.0317416	-0.00807812	-0.0169613	0.0109498	-0.0661029	-0.022268	0
83.6	-0.0340909	0.0173535	-0.0159901	0.000156874	0.0084604	0.0426288	0.026126	0.0431395	0.0118553	-0.00143133	0
83.8	-0.00171264	0.0417356	0.0358159	0.0310837	-0.00977729	0.0146263	0.00854788	-0.0285485	0.00893953	0.0241533	0
84	0.0535628	0.0525492	0.0400631	-0.0632126	-0.0206348	0.0294875	0.0638936	-0.00797175	-0.0555543	-0.00151019	0
84.2	0.064829	0.0406897	0.0409764	-0.00220254	-0.0262819	0.0164614	0.0478484	0.0176285	-0.0102717	-0.0246912	0
84.4	0.0092169	-0.00137538	0.0243157	0.0534323	-0.00927052	-0.0172925	-0.0152759	0.0119016	0.0455238	0.0016961	0
84.6	-0.0122026	-0.0181705	0.0127951	-0.0448198	0.0064545	-0.0111932	-0.0165166	0.021945	-0.0158444	0.0250424	0
84.8	0.0373686	0.0154579	0.0445161	-0.00405612	-0.0173546	-0.00889786	-0.01681	-0.0010657	-0.0494637	-0.000882571	0
85	0.00259829	-0.0397014	0.001778	0.00752656	0.0207497	0.000776551	0.00539969	-0.00780403	0.0263029	-0.0128722	0
85.2	0.0157225	-0.0163369	-0.0125266	-0.000455726	-0.00856755	0.00122933	-0.0275556	0.054212	-0.00139532	-0.0084601	0
85.4	0.0158772	0.0049166	-0.0307445	0.0014688	0.0201883	0.0197242	-0.0231979	0.028751	0.00985865	0.0120714	0
85.6	-0.0305132	-0.0286537	-0.00930274	-0.0142005	0.0466204	0.00813599	0.0144316	-0.0219605	0.0294766	0.0298586	0
85.8	-0.0377849	-0.0302857	-0.00190615	-0.0339811	0.0232815	-0.0186944	0.0156204	-0.0203145	-0.00707671	0.0313414	0
86	-0.0239523	-0.00328506	-0.0439176	-0.0204925	0.00540233	-0.00904859	-0.0343188	-0.000462949	-0.0491776	0.0232451	0
86.2	-0.0655583	-0.0319998	-0.00847904	-0.00690241	-0.0206193	-0.00248338	-0.0629986	0.0138631	-0.0391248	0.00882086	0
86.4	0.0134724	0.0104189	0.0104092	-0.0326481	-0.00326751	0.00245102	0.0250042	-0.0312739	0.0796938	-0.0124065	0
86.6	0.0217361	0.000331495	0.0198394	-0.0390468	0.0343052	0.0286939	0.00575289	0.00325949	-0.00408234	-0.0034144	0
86.8	0.00423235	-0.0235024	0.00637551	-0.00924707	-0.0131739	0.0123644	-0.00727308	0.00875655	-0.0151924	-0.00977186	0
87	0.00816774	-0.00555552	0.0112061	-0.00940007	-0.039014	0.0195305	0.0229482	0.00660748	-0.00649847	-0.0188474	0
87.2	0.0152195	0.0176237	0.0335907	-0.0082738	-0.0143653	0.0293621	0.0121984	0.0130633	-0.0209086	-0.0254079	0
87.4	0.022005	0.0326194	0.0190861	0.0298454	-0.0350297	-0.018379	-0.0122308	-0.0345763	0.0589335	-0.0275579	0
87.6	0.0131367	0.0640858	0.0136862	0.00211743	-0.00796659	0.0241297	0.0179113	-0.0319521	-0.00165041	0.0250726	0
87.8	0.0294675	0.0196454	0.0563548	0.036804	0.0167472	0.0333724	0.061217	-0.00511605	0.0458966	-0.00661657	0
88	-0.0191294	0.023325	0.0302279	0.00639128	0.0120402	0.00859898	0.0470371	0.0200005	0.0363714	-0.0166027	0
88.2	-0.0157218	0.0175604	0.011717	-0.00645204	0.0121951	-0.0242694	-0.000830187	0.0186556	-0.00578865	-0.00377153	0
88.4	0.0189548	-0.00450925	-0.0151836	0.0226501	0.0138238	-0.0410322	-0.00394993	0.00164601	0.00191218	-0.0195119	0
88.6	-0.000320161	0.012461	-0.08216	0.0224475	0.00514055	-0.0132638	0.0308771	-0.0157773	-0.00327562	-0.0306507	0
88.8	0.00330783	0.0150671	-0.0650984	0.0185763	0.00242128	0.0228845	0.0250086	-0.0352539	-0.0190133	-0.000459102	0
89	0.0149181	-0.0187283	0.00396987	0.0100048	-0.00644947	-0.0122086	-0.00475197	-0.0261098	0.0575945	0.0148194	0
89.2	0.00123256	-0.0412805	-0.0109664	-0.0118367	0.026215	0.00609408	-0.0121284	0.00580729	-0.0438637	0.0144638	0
89.4	0.0170267	0.0425302	-0.00812388	-0.0168987	0.0380074	0.0347653	0.00722308	-0.012682	-0.0421347	0.0149715	0
89.6	0.022507	0.022783	0.0127584	-0.00471887	-0.00638149	0.0382519	-0.0158059	-0.0176564	0.0353782	-0.0147391	0
89.8	-0.00859452	-0.0613946	0.00997651	-0.0176122	-0.0304503	0.00496931	-0.0282661	0.00189744	0.00273864	-0.0189361	0
90	-0.0378673	-0.00804597	-0.00194479	-0.0185144	0.00944615	-0.0328216	0.00649261	0.00202003	-0.0514276	0.0242134	0
90.2	-0.044186	0.0164458	-0.0175805	0.0533208	0.0257218	-0.00654511	-0.0330967	0.0246277	-0.0140838	0.0058135	0
90.4	0.00830635	-0.0155437	0.0064683	0.0320081	-0.00563669	-0.0145009	-0.0483506	0.0111583	-0.0172576	0.0128886	0
90.6	0.0127525	0.00241224	0.0150101	0.00641097	-0.0112571	-0.049617	-0.0154436	0.0162604	-0.0120251	0.0133807	0
90.8	-0.0112022	0.00425519	0.0173241	0.0381781	-0.0279248	0.0162009	0.0270746	-0.00195211	-0.00431401	-0.0124466	0
91	-0.00507932	-0.0406994	0.0316174	0.036626	-0.0369473	0.0153324	0.00738488	0.00445979	0.0116953	0.0106769	0
91.2	0.00797007	-0.0217806	0.0195275	0.0166036	0.00716662	-0.0463194	-0.0137333	0.0237286	0.0169652	0.0400398	0
91.4	-0.00229615	0.0497222	-0.0345904	0.029251	0.038113	0.0117398	0.0273226	0.000139831	-0.0138962	-0.00179563	0
91.6	0.00129543	-0.0145362	-0.0474735	-0.0467954	-0.0152946	-0.027655	-0.00132321	0.0473111	-0.00541335	0.0105125	0
91.8	-0.0160932	-0.0299218	0.00372733	-0.00847773	-0.0290214	0.00194589	0.0258925	0.0268457	0.0183872	-0.0108557	0
92	-0.0107752	0.000627272	-0.0291461	0.0174256	-0.00676177	0.00788051	0.0467702	0.0159482	0.0624433	-0.0137674	0
92.2	0.00393689	-0.0103214	-0.0139223	-0.000807238	-0.00798003	-0.0231925	-0.0226967	-0.0475892	0.0152272	0.0115073	0
92.4	0.0105587	0.0132473	0.0295021	-0.0169458	0.00388429	-0.0267631	-0.0583178	-0.0704331	-0.0472547	0.0248794	0
92.6	0.00758112	0.0721658	0.00357318	-0.0252576	0.0319244	0.00791786	-0.00651308	0.00697598	-0.0122317	0.0114056	0
92.8	0.00571862	0.0213779	0.0164373	-0.0149765	0.00696842	0.0293502	-0.00816419	-0.00283995	0.0108724	-0.0194592	0
93	0.044712	-0.0145244	0.015506	0.00131831	0.00665632	-0.0111968	-0.00439698	-0.0192303	-0.00830071	-0.0466031	0
93.2	-0.00920302	-0.0306549	-0.00547274	-0.0594863	-0.00538449	0.00041099	-0.00911116	0.00523453	-0.0512627	-0.0243482	0
93.4	-0.012329	0.026003	-0.00471805	-0.0317204	-0.00968186	0.0060625	0.0452213	-0.00424778	-0.0328392	-0.0184866	0
93.6	-0.0111221	0.0190932	-0.00151665	0.014053	0.0121489	-0.0246994	0.00441212	-0.0117801	0.0073435	-0.0194556	0
93.8	-0.0219783	-0.0490524	0.00935889	0.00425235	0.0186767	-0.013048	-0.0625994	0.0200724	0.0316679	0.0211408	0
94	0.00471428	-0.0216507	0.0319259	0.0150946	-0.00899889	0.0332735	0.0188388	0.0296634	0.0278566	0.0460042	0
94.2	-0.0484608	0.0063123	-0.00572155	0.0139045	-0.0132938	0.00659594	0.0359139	-0.00305377	-0.0258679	1.89623e-05	0
94.4	-0.0435917	-0.0700448	-0.0497401	-0.00246528	0.00621532	0.00422261	0.00309397	-0.0123021	0.0531678	0.0287451	0
94.6	-0.0147493	-0.0389925	-0.0155608	-0.0261695	0.00372483	-0.0360262	-0.035793	-0.00665364	0.10779	0.0112467	0
94.8	-0.0100546	0.00252322	-0.0263116	-0.0373971	-0.00929934	-0.0517463	-0.0535306	0.00710537	0.0158499	-0.0170615	0
95	-0.00426867	-0.0211307	-0.00844304	-0.0150552	-0.0184574	-0.00190735	-0.0237794	-0.0269293	-0.0159059	0.0254157	0
95.2	0.00237164	-0.0131871	0.0612506	-0.00477788	-0.0228724	0.0258144	0.0403262	-0.0315986	0.0527239	0.0268609	0
95.4	-4.93185e-05	0.0443421	0.0044874	-0.020728	-0.0123062	0.00256795	0.0550358	0.0866249	0.0219703	-0.0641187	0
95.6	0.0457052	0.0473778	-0.0627873	0.0337499	0.0120799	0.0398501	-0.00131109	0.0957715	-0.00583089	-0.0110942	0
95.8	0.0434973	0.0215896	0.025583	0.0108903	0.026169	0.0524165	0.0672368	-0.0159682	-0.0971663	0.0161908	0
96	0.0362808	0.00435225	0.06363	-0.00105068	0.014102	0.0730438	0.0383534	-0.0228237	-0.0474729	-0.0125489	0
96.2	0.0296731	0.045093	0.0373541	0.0673285	0.000648484	0.0324682	0.00592086	-0.0227666	0.0139422	-0.0143241	0
96.4	0.00409784	0.103768	0.0135319	0.0863611	-0.00511484	0.0189856	0.0314041	0.0146425	-0.0104339	0.0110675	0
96.6	0.00373721	0.0815737	0.00768582	0.0293543	-0.00298731	0.0769749	0.026543	0.0889241	0.00309507	0.00709925	0
96.8	0.038312	-0.0027873	0.0459002	0.0490022	0.0192867	0.0208714	0.0276428	-0.0272062	0.0558014	-0.018842	0
97	0.0100684	-0.0141881	0.0470072	0.0274575	0.0260013	-0.02128	-0.00990581	-0.0408756	0.0365703	-0.0264118	0
97.2	0.0688436	-0.0020426	-0.00193252	-0.0405326	0.00334544	-0.0407941	0.0390404	-0.00523638	-0.0263349	0.0036771	0
97.4	-0.00362783	-0.0594689	-0.0483483	-0.0710886	0.0126209	-0.0395866	0.00745919	-0.0168692	-0.0212603	-0.0158341	0
97.6	-0.0761966	-0.0571139	-0.0398548	-0.0128743	0.00194953	-0.0312848	-0.0825881	-0.0135531	-0.0316033	0.000782801	0
97.8	-0.0265537	-0.0234228	-0.00781647	0.0157413	-0.0251121	-0.0419478	-0.0737859	0.0275004	-0.0356594	0.0333581	0
98	-0.028496	-0.0759105	-0.00724228	-0.0526654	-0.0022628	-0.0609457	-0.00205918	0.00430885	0.023076	-0.0134285	0
98.2	-0.0428725	-0.0395292	-0.0243518	-0.0393271	0.00327428	-0.0356364	0.00980181	-0.068658	-0.0247082	0.0087345	0
98.4	0.0171589	-0.0134951	-0.062432	0.00683039	0.00989576	0.0313097	0.0131976	-0.011539	0.0211844	0.0244871	0
98.6	0.00878064	0.00337967	-0.00613591	-0.0216007	0.00470262	0.0305545	-0.00405325	-0.0240314	0.0183176	-0.00920487	0
98.8	-0.0247333	0.0420531	0.0339997	0.014832	0.00774678	-0.000423721	0.000446834	0.00811008	0.0129992	-0.0245582	0
99	-0.0182828	0.0664613	0.0178721	0.0232117	0.0015041	0.0240734	0.00653119	0.0499541	0.00425715	0.00436789	0
99.2	0.00447516	0.0193316	-0.00508663	-0.0540752	-0.0129754	0.0511934	-0.0170562	0.00357777	-0.00842861	0.00282048	0
99.4	0.00980766	-0.0474719	-0.0250456	-0.0190063	-0.00158362	-0.00118931	-0.0421797	0.00301608	0.0309205	-0.0402265	0
99.6	-0.0259569	-0.0121948	0.00947692	0.0119237	-0.00962282	-0.0375719	-0.0755071	0.0259131	-0.0169595	-0.00400264	0
99.8	-0.0355378	-0.00245079	-0.0342158	-0.0448312	-0.00680842	-0.0484938	-0.0415882	0.0118177	0.0247083	0.0132616	0
100	-0.018386	-0.000330059	-0.0341341	-0.00872659	-0.0297237	-0.0312368	-0.0135993	0.023867	-0.0210775	0.0242914	0
100.2	0.000808049	-0.0284578	-0.0397593	0.0373897	-0.0141392	-0.0254903	-0.0365644	-0.00550239	-0.0483198	0.0117674	0
100.4	0.00256894	-0.039577	-0.0413494	0.0306368	0.013109	-0.0142808	-0.0193119	-0.0356781	-0.0167986	0.0156543	0
100.6	-0.00620565	-0.00964451	0.0267849	0.0243728	-0.0113432	0.00752098	0.0227664	-0.017009	-0.0165318	0.0428225	0
100.8	-0.00418906	-0.0293876	0.023106	-0.00551814	-0.00792948	-0.0217522	-0.0281981	-0.0575522	0.0157508	-0.00418769	0
101	-0.014072	0.0243349	-0.0485819	0.0388241	-0.00153806	-0.0164727	0.0175315	-0.0165555	-0.0532151	-0.0132332	0
101.2	-0.0150873	0.0206377	0.000146417	-0.0122605	0.00145873	-0.000726272	-0.00401784	-0.0201264	0.00801859	-0.0243261	0
101.4	-0.0208192	-0.0339725	0.00778211	-0.0342858	0.000770798	-0.0229466	-0.015936	-0.0359135	0.00945416	-0.062038	0
101.6	-0.025575	-0.0653512	0.00723273	-0.0216499	-0.0122287	-0.012229	0.00496399	-0.0278572	-0.0373759	-0.0232066	0
101.8	-0.0187032	-0.0468797	0.0205593	-0.0369698	-0.0191304	-0.000590518	-0.0089166	-0.0232503	0.00147628	0.0413844	0
102	-0.00675207	0.00593254	-0.0251928	0.00536564	-0.0189525	-0.0495239	-0.00795969	-0.0128024	0.0346383	-0.0071427	0
102.2	0.0133202	0.0521124	0.0357507	0.079035	-0.0375415	-0.0123994	0.0518375	0.0196442	0.00650447	-0.0327631	0
102.4	0.027349	0.0519794	0.0216202	-0.0242896	0.0332504	-0.0100349	0.0129408	0.0172355	-0.00364435	0.0199305	0
102.6	0.0470196	0.0267601	0.0258136	-0.0194893	0.0445802	-0.00417324	0.00129816	0.024489	0.0253207	0.0117862	0
102.8	0.030917	0.0628082	0.0280485	0.0441094	0.0208509	0.0494135	0.0267487	0.00703593	0.0332723	0.00340374	0
103	0.0149036	0.0740321	0.0116895	0.0345964	0.0127565	0.0807382	0.043031	0.0130484	0.0376245	0.0281644	0
103.2	0.0313203	0.0198893	0.0207003	-0.00638819	0.0148792	0.0489329	0.042056	0.0643714	0.0475276	0.00198908	0
103.4	0.0235751	0.0158707	0.0211182	-0.0301183	0.0256638	0.021395	0.0113778	0.051848	0.0227341	-0.054859	0
103.6	0.0170106	-0.0214406	-0.0140732	-0.0112082	-0.0135161	0.0200848	-0.0109187	0.0162837	0.0355474	-0.0202954	0
103.8	0.0218153	0.00397714	0.00956952	0.0395856	-0.00270268	0.0407101	0.0314197	0.0222066	-0.00617919	0.0349405	0
104	-0.000635162	-0.00940584	0.0310958	-0.00355232	-0.00423304	0.0368169	-0.0245274	0.0439484	-0.00774348	0.0296197	0
104.2	-0.0412298	0.0055818	-0.00822703	-0.0440346	-0.00102518	0.0114878	-0.0408055	-0.0241374	0.00208155	-0.00507811	0
104.4	-0.00647352	0.0070206	-0.0226307	-0.0272462	0.00994721	-0.000165747	0.00673234	-0.0512981	-0.0244394	-0.0140183	0
104.6	0.0548696	-0.065991	0.03035	-0.0246791	-0.00130489	0.00889512	-0.0167177	0.045805	-0.013621	-0.00163163	0
104.8	-0.00718169	-0.016472	0.0296962	0.00739511	0.0180255	0.00799071	-0.00156428	0.0108717	0.0142168	0.0091085	0
105	0.0219463	0.0119759	-5.84343e-05	0.0532138	0.0147659	-0.0262508	-0.00160782	-0.0472535	-0.0955812	0.0235028	0
105.2	-0.0461666	0.00304427	-0.00661172	0.0419909	-0.0164944	-0.0137361	-0.00273759	-0.0432368	-0.0571279	0.0176168	0
105.4	-0.0232846	-0.0225671	0.00342247	0.0375852	-0.0187035	0.018157	0.0180729	0.000495469	0.00801394	0.027185	0
105.6	0.0111261	-0.0306573	-0.0174911	-0.00513545	-0.0068062	-0.00811534	0.00455909	0.0180283	-0.00557303	0.0113417	0
105.8	-0.0252138	-0.0161704	-0.0514899	-0.0430998	-0.0084483	-0.0285828	-0.0154552	-0.0230583	-0.00125651	0.00783865	0
106	0.0192298	-0.008353	-0.0230687	0.0192443	-0.0100194	0.00723012	0.0217692	-0.0643612	0.0337166	0.0544967	0
106.2	-0.0165444	-0.0110224	0.0416161	-0.00997026	-0.0312081	-0.0447913	-0.00110473	-0.0269864	0.00837989	-0.024256	0
106.4	-0.0371888	-0.0279783	0.0218567	-0.0274044	-0.0424046	-0.0250492	-0.038125	-0.0120509	-0.0299319	-0.0392405	0
106.6	0.023021	0.0520714	0.00442166	0.00403072	-0.00185767	0.00620629	-0.00252763	0.00464925	-0.0223778	-0.0574582	0
106.8	0.0535714	0.0185016	-0.0251263	0.0180629	0.0200331	-0.000985705	0.0671331	0.0269456	-0.00748883	-0.0331389	0
107	0.00850227	-0.0131776	-0.0428587	-0.0012256	0.0130423	0.0045773	0.0374907	0.0531381	0.0131405	0.00606662	0
107.2	-0.0169412	0.0659525	0.00838664	-0.0289238	0.0173212	0.0213001	-0.0446671	0.0492913	0.0464899	-0.0087345	0
107.4	0.00260319	-0.0162029	0.04061	-0.0312963	0.0149715	-0.0116309	-0.00796908	-0.00845485	0.0258577	0.000721463	0
107.6	-0.0288221	-0.00136595	-0.02383	0.0491839	0.022094	-0.0347232	0.000448489	0.00910571	-0.029119	0.0115278	0
107.8	0.00283272	0.0245457	-0.0668212	-0.0175531	-0.00511009	-0.0500951	-0.0516088	-0.00771503	-0.00183777	0.00838654	0
108	0.00712061	-0.00647927	0.0150513	-0.0549098	-0.00952516	-0.0510574	0.00835024	-0.0247573	0.0225266	0.0101047	0
108.2	-0.0092917	-0.0142785	0.0238109	0.0123206	0.0133965	-0.0131679	0.0153491	-0.0152476	-0.0166753	-0.0191137	0
108.4	0.0033806	-0.0230553	-0.0260817	0.0361344	0.000395418	0.0196293	-0.0644886	-0.0016354	-0.0554318	-0.0283068	0
108.6	-0.00948375	-0.0834489	0.0157878	-0.0105163	-0.0432379	0.000612946	-0.0270818	0.0107001	-0.04359	0.0263306	0
108.8	-0.0390405	-0.056603	-0.018656	0.000322426	-0.0362102	-0.0112828	0.0303207	0.011805	-0.0140854	0.00640178	0
109	0.0316836	0.0195225	0.0175034	0.00451838	0.000332462	0.000253173	0.0335919	-0.012585	0.0358449	-0.0475193	0
109.2	-0.00216181	0.0239202	0.0311099	0.0178728	0.0192574	0.0246855	0.00725097	-0.0123687	0.0531198	0.014788	0
109.4	-0.0139349	0.0441006	0.0292086	0.0427815	0.0260503	0.0486439	0.0212596	-0.0324094	0.00535285	0.0321597	0
109.6	0.0269852	0.0576879	0.0134811	0.0338254	0.0313571	0.0436658	0.0307624	-0.0083224	0.0124035	-0.0132267	0
109.8	0.0143885	0.0101581	-0.0168827	0.0122449	0.0274794	0.00169251	-0.0278978	0.0479082	0.0533983	-0.00772587	0
110	-0.0173218	0.00523679	-0.0110598	0.00829098	0.0128591	-0.0327047	-0.0781894	-0.0010988	-0.0156397	-0.00775853	0
110.2	-0.0264642	0.0499129	-0.00758633	-0.0562896	-0.000827174	-0.0252787	-0.039174	-0.0445666	-0.0348653	-0.0511999	0
110.4	0.0113964	0.00100247	-0.0353465	-0.0485445	-0.00585115	-0.0338735	-0.0464308	-0.0244276	-0.00500682	0.00982417	0
110.6	0.0210945	-0.0410157	-0.0209474	-0.0492693	-0.00692305	-0.0415242	-0.0496661	-0.0199294	0.00685102	0.0305094	0
110.8	-0.0245327	-0.0351204	-0.0219437	-0.0102588	-0.0272392	-0.0133404	0.00195579	0.0173713	-0.0104023	0.0055175	0
111	-0.0261299	-0.0169575	-0.0239555	0.0268026	-0.0538588	-0.00238617	0.00471562	0.00578154	0.00423627	0.0124216	0
111.2	0.0192539	-0.0186616	-0.00657483	-9.61937e-05	-0.0337685	-0.0259402	-0.014518	-0.0570134	0.0161473	0.0161504	0
111.4	-0.015092	-0.0399404	-0.0418733	0.0155444	0.0288199	-0.009262	0.0788849	0.0138888	-0.0382073	-0.0214707	0
111.6	-0.0160458	0.00719433	0.0269546	-0.0110738	0.0349074	0.00363558	0.027231	-0.038483	0.0277459	-0.0174508	0
111.8	0.00826556	0.0688651	0.0693862	0.0253708	0.0136499	0.0759484	0.0354672	-0.0215358	0.00741525	0.0124553	0
112	-0.00966116	0.041833	0.0373034	0.061242	-0.0112473	0.0830321	0.0469222	0.00465692	0.0134602	0.025614	0
112.2	-0.0126599	0.0158053	-0.00367833	0.0130831	-0.00785108	0.00564752	0.0340856	0.00255945	0.016213	0.00974199	0
112.4	0.00327664	0.00262605	0.0215778	-0.0169813	0.000828893	-0.0473191	0.0184565	0.0230701	-0.0500103	-0.00600506	0
112.6	-0.0114915	-0.0478871	0.0545441	0.020807	-0.00873499	-0.0309783	-0.0204517	0.038344	-0.0597056	0.00516728	0
112.8	0.0150661	0.0033854	-0.0354035	-0.0303007	0.0137914	0.002863	-0.0191666	0.0173597	0.00866048	0.0194847	0
113	0.0120513	0.00569721	-0.0597806	-0.022036	-0.018577	-0.0133017	0.000519067	0.0218451	0.0378619	0.00824686	0
113.2	0.0457492	-0.0432794	0.0172488	-0.0389602	0.00266478	-0.0287527	-0.0340476	0.00960807	0.0227893	-0.000756713	0
113.4	0.0183622	-0.0232168	0.017127	-0.00141888	-0.00264329	0.00906053	0.00886168	-0.0435274	0.000217244	-0.000303217	0
113.6	-0.0299339	-0.0177123	-0.0261957	0.0425321	-0.0261462	0.012615	0.0326858	-0.0222426	-0.0135253	-0.00628268	0
113.8	-0.00828074	-0.0656169	-0.0131141	-0.0116827	0.00672504	-0.0173231	-0.0449516	0.0276764	-0.00457833	-0.00289526	0
114	0.00708174	-0.0115939	0.00588041	-0.0444448	0.0185171	0.0306215	-0.0347516	-0.013707	0.0165117	0.00829879	0
114.2	0.0253455	0.055449	0.0556499	0.0174875	-0.00882768	0.0355309	0.0171667	0.0742743	-0.00195697	-0.0399118	0
114.4	0.0572648	0.0469071	-0.0311117	0.0164382	0.0328211	0.0193478	0.0544592	0.000357066	0.0199649	-0.0367517	0
114.6	0.0186401	0.038114	0.0128514	-0.055741	0.0152214	0.00810333	0.0178253	-0.0312994	0.0267499	-0.0236229	0
114.8	-0.0150362	0.0172891	0.0478093	-0.0237206	-0.0222117	0.00851802	0.0173135	0.0130766	-0.0439774	-0.0195811	0
115	0.0246615	-0.00701263	-0.0166966	0.0441838	-0.00697903	0.00469745	0.021342	-0.0129663	-0.0554515	-0.0228185	0
115.2	0.0393408	0.00324192	-0.0107628	0.0128934	0.00496844	0.0196419	-0.0470834	-0.0323785	0.0176909	-0.0128703	0
115.4	-0.0112713	0.00201216	0.022065	0.020307	-0.0113364	0.0705291	-0.0172309	0.0662739	-0.0339322	0.0330584	0
115.6	0.0378329	0.0148731	0.0530829	0.00574971	-0.0234022	0.019588	0.0899342	0.0317687	-0.0163832	-0.0115258	0
115.8	0.0145663	-0.015322	-0.0213107	-0.0141516	-0.0144769	0.0171691	0.065484	0.0297544	0.0789084	-0.0229708	0
116	-0.0302946	-0.00729792	-0.046162	-0.0098632	0.0122264	0.021578	-0.0324151	0.00365672	0.0556217	0.0314467	0
116.2	-0.0348501	0.0316928	-0.0109214	0.0264662	0.0115417	-0.0171989	-0.0405428	-0.032133	0.00529989	0.0450391	0
116.4	-0.0362976	0.00363735	-0.00920717	0.0381314	-0.0198094	-0.0509366	-0.0262183	-0.0188597	0.00936924	0.0165895	0
116.6	-0.0401049	-0.0401704	-0.0245833	-0.00821388	-0.0274429	-0.0382307	-0.0685349	-0.00871154	-0.0413928	0.0217742	0
116.8	-0.0278451	0.0258073	-0.0338438	-0.0297264	-0.000622249	-0.00345193	0.00191788	-0.00218757	-0.0482861	9.3672e-05	0
117	-0.0362166	-0.00601351	-0.00189001	-0.0490559	0.0440615	-0.0349071	-0.0193243	-0.0270495	0.0249934	0.000768217	0
117.2	-0.0304679	-0.0626539	-0.0269967	-0.0192623	0.0402892	-0.0233104	0.010556	0.00975456	0.0352935	0.0274282	0
117.4	-0.0315837	-0.0336507	-0.025264	0.0136274	-0.00110079	-0.0137909	-0.0213007	-0.00835986	-0.0199075	0.0321407	0
117.6	-0.0152235	-0.0107297	0.0192352	0.0218851	0.00705369	-0.0033158	-0.0154597	-0.0199327	-0.0300163	0.00355038	0
117.8	0.0406341	-0.0216495	0.0315981	0.0261706	0.0274754	0.0405501	0.0712136	0.0377893	-0.00844783	-0.018493	0
118	0.0576862	0.0395671	0.0274155	0.0175097	-0.0270448	0.0249014	-0.0101695	0.0108655	-0.0319273	-0.0154149	0
118.2	0.023256	0.0310716	0.0102538	-0.00397116	0.00165711	-0.0215115	0.0205164	0.0181329	0.0099015	-0.0106767	0
118.4	0.0373016	0.0113405	0.0402824	-0.0486702	0.0136716	0.0147885	0.0320502	-0.0361065	0.040789	0.0285317	0
118.6	0.0020875	0.0606316	0.0232244	-0.020842	0.00823028	-0.0172236	-0.046325	-0.0458747	0.00714654	0.0138027	0
118.8	-0.0121815	0.0645954	-0.0181173	0.0501708	0.00730691	-0.0204713	-0.0134243	0.00720912	0.0151792	-0.0375521	0
119	0.0129425	-0.0081473	-0.0142018	0.046955	-0.0065358	0.0239109	0.0285206	0.0136458	0.0450027	-0.0438791	0
119.2	-0.0159717	-0.0276562	-0.0118252	-0.00532618	-0.0160807	-0.0146634	-0.0377026	-0.014572	0.0136004	-0.0106731	0
119.4	-0.0294156	0.0126362	-0.046184	5.70667e-05	0.00559602	-0.0235096	0.0648765	0.0161925	0.00540706	0.010923	0
119.6	-0.0190662	0.0123915	0.00166399	-0.0534016	-0.0260816	-0.00816604	-0.019309	-0.0251974	-0.0565862	0.0316006	0
119.8	0.00720753	-0.0180505	0.0705449	-0.0393479	-0.0164841	-0.033541	-0.0601346	0.00162778	-0.068255	0.0380672	0
120	-0.0230972	-0.0520592	0.00752466	0.0382108	0.00711883	-0.00814483	0.0205805	0.0469712	-0.00352192	-0.00668908	0
120.2	-0.047713	-0.045455	-0.0195374	0.0397157	0.0163216	-0.00671851	0.043169	0.012727	0.0536741	-0.00567488	0
120.4	-0.00652066	0.0336423	0.0531032	0.00897929	0.0227404	-0.0396975	0.011724	-0.0319685	0.0381618	0.0375941	0
120.6	0.033587	0.0821511	0.0255963	0.0531183	0.00805109	0.0125801	0.034362	0.000133525	-0.00577459	0.00231784	0
120.8	0.058911	-0.0247862	0.0116939	0.0244959	-0.0171886	-0.00470104	-0.0307801	0.0144886	0.0102774	-0.00418054	0
121	0.044919	0.00465616	0.0348107	0.0503499	0.0029623	-0.0302921	-0.00166136	-0.0328408	0.036095	0.0160489	0
121.2	0.0173485	0.0542076	0.0468672	0.026906	0.00587336	-0.0151052	0.00963918	-0.0603788	0.0732289	0.00666584	0
121.4	0.00608532	0.0255169	0.0424744	-0.0129755	0.0190771	-0.0251409	0.0317927	-0.00339236	0.0545539	-0.00684681	0
121.6	0.0178222	-0.00961859	0.0275957	-0.0136907	0.0338958	-0.0358722	0.0662666	0.0202135	0.0230762	0.00365156	0
121.8	0.0504052	0.00136488	0.0404315	-0.00612788	0.0195082	0.0090063	0.0503987	0.00264573	0.0486742	0.00842671	0
122	0.0690085	0.0289375	0.101767	0.015533	0.034543	0.0290148	0.042531	0.0781062	0.0476043	0.0101056	0
122.2	0.00847214	0.0601681	0.0750561	0.0523537	0.0606571	-0.00229167	0.0340637	0.024526	0.0278786	0.0647988	0
122.4	0.00234178	0.0114744	0.0329913	0.0431013	0.0555437	0.0171537	0.028223	0.0435622	0.0790982	0.0408551	0
122.6	0.0352128	-0.0300123	0.0493516	-0.0356926	0.0660479	0.0099605	0.0441272	0.0457285	0.0391441	0.037185	0
122.8	0.0373999	0.0123439	0.104538	-4.29973e-05	0.0552709	-0.021959	0.0379474	0.04214	-0.0057593	0.0242872	0
123	0.0546187	0.109349	0.114716	0.120542	0.0569697	0.0419053	0.0391888	0.0896325	0.0612606	0.0335783	1
123.2	0.143712	0.170507	0.122439	0.132737	0.128822	0.141058	0.123034	0.137704	0.119174	0.118549	1
123.4	0.204171	0.147955	0.225677	0.127088	0.138895	0.0933875	0.200574	0.208528	0.110483	0.0849181	1
123.6	0.165932	0.165982	0.129518	0.0765368	0.108126	0.142127	0.168854	0.26043	0.130512	0.0742529	1
123.8	0.171108	0.24	0.0922306	0.123716	0.0847099	0.149741	0.148058	0.163119	0.161863	0.0381644	1
124	0.190191	0.211651	0.113697	0.163079	0.0667835	0.111372	0.147868	0.105254	0.141471	0.0246322	1
124.2	0.140737	0.135716	0.117365	0.125746	0.075625	0.089482	0.132414	0.106472	0.0960067	0.0523004	1
124.4	0.0876297	0.110363	0.0979823	0.0959649	0.0907654	0.0745563	0.112648	0.0460354	0.107393	0.0605567	1
124.6	0.115072	0.0854614	0.0597178	0.10619	0.0535252	0.0634521	0.108918	0.0176731	0.135804	0.0416658	1
124.8	0.125414	0.123103	0.0951275	0.0979728	0.0238832	0.0725208	0.11479	0.0892063	0.0638271	0.0245421	1
125	0.0844682	0.114872	0.0829276	0.0307033	0.0196033	0.0608776	0.0743902	0.064669	0.0936118	-0.0204288	1
125.2	0.0717477	0.11463	0.106834	0.0273148	0.0241838	0.0401877	0.0979488	0.0666368	0.0265221	-0.0445346	1
125.4	0.0815363	0.0819449	0.106969	0.0548245	0.012229	-0.0108223	0.131876	0.0345414	-0.0107636	-0.0116328	1
125.6	0.0608019	0.0589572	0.0507253	0.0279131	-0.0133671	-0.0125249	0.106867	0.010332	0.0225813	-0.0164441	1
125.8	0.0204931	0.0941434	0.0253989	0.0281318	-0.0175419	0.0261727	0.0604321	0.0633867	0.00777506	-0.0672027	1
126	0.0115589	0.056294	0.0245811	0.103599	0.0060184	-0.0449145	0.0289202	0.0128113	0.0488048	-0.0330778	0
126.2	0.024995	0.0138939	0.00335951	0.0217484	-0.0032355	-0.0201724	0.0549718	-0.0126291	0.0402764	-0.0531243	0
126.4	-0.00241223	0.0431983	-0.0204749	0.0123658	-0.0279085	-0.0458804	0.0356196	-0.0157197	0.0438602	-0.0474158	0
126.6	-0.00536348	0.0800824	-0.0431733	0.000520581	-0.0356318	-0.0781573	-0.0209122	-0.00733731	0.0363431	-0.0456419	0
126.8	0.00485558	0.0509786	-0.029846	-0.0325937	-0.0467892	-0.0533494	-0.0382745	-0.00715742	0.0080478	-0.0327195	0
127	-0.00364883	0.00336908	0.0181161	-0.0392492	-0.0257351	-0.0260457	-0.000712913	-0.00940865	-0.000153246	-0.0195951	0
127.2	0.00647226	-0.00866605	0.0345225	-0.0305145	0.027706	-0.0382575	0.0159073	-0.00319176	0.024589	-0.055093	0
127.4	0.0166247	-0.018907	0.00132168	0.0423893	-0.0216908	-0.055131	-0.0305026	-0.0380282	0.0232931	-0.0396323	0
127.6	-0.0156023	0.0622257	-0.0294163	0.0381153	-0.0297978	-0.0700983	-0.0145073	-0.0789982	-0.0799923	0.0300572	0
127.8	-0.0266863	-0.000137328	-0.0143611	-0.0242211	-0.0406947	-0.0561406	-0.0454301	-0.0152815	-0.0241943	0.00986028	0
128	-0.0162036	-0.0230056	-0.0293032	-0.0443777	-0.00731563	-0.0550533	-0.0480925	0.0397365	0.0143835	-0.0425363	0
128.2	-0.00942301	0.0184071	-0.0372351	-0.0175472	0.00955547	-0.0476747	-0.0303995	0.0083504	0.00277945	-0.0214334	0
128.4	-0.00811527	0.0040318	0.015517	-0.00554936	-0.0164435	-0.0358146	-0.0188411	-0.0152538	-0.00171369	0.0232537	0
128.6	-0.0126199	0.0238765	0.0233813	0.0186122	0.0206122	-0.0492311	0.0367123	0.010851	-0.0820142	0.00665579	0
128.8	-0.0115316	-0.000643632	-0.0260383	0.0988382	-0.00559542	0.0320029	-0.0330668	-0.0117099	0.0191734	-0.0108034	0
129	0.0168847	0.0232265	0.00901114	-0.0131616	-0.00232963	0.0256113	-0.021668	-0.0098089	0.0205909	-0.0190585	0
129.2	0.0123397	0.0301176	-0.0320521	-0.042308	-0.0142167	0.00926488	-0.0270722	0.0405393	0.00642576	0.0289348	0
129.4	-0.0120787	-0.0325587	-0.0188225	0.0155774	-0.027882	0.0101915	-0.0460757	0.0429922	-0.00913131	0.0230443	0
129.6	-0.00710247	-0.0551277	0.0306054	0.00719216	-0.0283141	-0.0035493	-0.0297847	-0.00849291	-0.0494017	-0.0312954	0
129.8	0.00929054	-0.015535	-0.0606943	-0.0164534	-0.0308188	0.000503388	0.000439285	-0.0259348	-0.0419344	-0.0197607	0
130	-0.00572157	-0.0487236	-0.0848645	-0.020555	-0.00895683	0.018696	0.0419794	-0.0203486	0.0143976	-0.00806474	0
130.2	-0.0233139	0.00137697	0.0164877	-0.0836636	-0.0237521	-0.0208432	-0.0083674	-0.0350708	0.0802477	-0.0212378	0
130.4	-0.0234619	0.0177284	0.0512051	-0.0484316	-0.00937931	-0.0315492	-0.00754021	-0.0383791	0.028122	-0.0452779	0
130.6	0.0180687	-0.00777616	0.034288	-0.000910883	0.00980974	-0.0216682	-0.00171159	-0.0131135	-0.0155368	0.00536249	0
130.8	0.017924	-0.0447762	0.0100467	0.00202945	0.00956513	0.00193698	-0.0333056	0.0126401	0.0346204	0.0335182	0
131	-0.0116273	-0.0337645	-0.0016595	0.0180027	-0.00844388	0.0258874	0.0028998	0.0163211	0.0512891	-0.0102022	0
131.2	0.0256315	0.0498899	0.006298	0.0358332	-0.0323954	0.0197313	0.0929718	0.0289939	-0.031065	-0.0155743	0
131.4	0.0183738	0.0571716	-0.02083	0.00437737	-0.0130175	0.025065	0.0308751	0.055836	-0.0406423	-0.0138055	0
131.6	-0.0177187	0.0175454	0.0336269	-0.0208689	0.00780888	0.00974513	-0.00193284	-0.0400859	-0.00168858	0.0163876	0
131.8	-0.00303811	0.0100026	-0.0106441	-0.0226085	0.00260992	0.0086145	0.00232668	-0.0711564	-0.0482351	-0.00313854	0
132	-0.0023441	0.00939852	-0.048462	0.0124734	0.0219233	0.00636478	-0.0273232	-0.0177454	-0.0515273	-0.00303242	0
132.2	-0.0299085	-0.0296436	-0.0187768	0.0383028	0.0334995	0.0029756	0.00885952	0.0163531	0.0349175	0.00929936	0
132.4	0.00242187	-0.0321389	-0.00814762	0.0281026	0.00414583	0.0138055	0.0659268	-0.00830969	0.0381001	-0.0228863	0
132.6	0.0492026	0.0308892	0.0171192	0.00603121	-0.0023133	-0.000106971	-0.0484291	-0.0218076	-0.0534296	-0.0247445	0
132.8	-0.0469631	-0.0473425	0.0315667	-0.0764188	-0.0178015	-0.050208	-0.0573286	0.0741016	-0.0156154	0.000208411	0
133	-0.0537287	-0.0442741	-0.0410223	-0.0555319	-0.00051311	-0.0552346	-0.066782	-0.024586	-0.0338603	0.00966939	0
133.2	-0.00547815	-0.0213407	-0.0627758	-0.0117766	0.0465958	0.00479442	-0.00101821	-0.0126971	0.0252377	0.0139795	0
133.4	0.0112186	-0.0111768	0.0239895	-0.000981194	0.0342406	0.053341	0.0958946	0.0117089	0.0463475	0.0137584	0
133.6	0.0153042	0.0426054	0.0667459	0.0365382	-0.0109403	0.0399043	0.105905	-0.0303713	0.0123984	-0.00422889	0
133.8	0.025903	0.0958399	0.00349186	0.0500447	0.00193402	0.00608205	0.0528996	0.0391335	0.0501683	-0.0109386	0
134	0.0224979	0.0733162	0.00124604	-0.0449125	0.0111427	0.00266636	0.0215444	0.0442973	-0.0115633	0.0213735	0
134.2	0.0221378	0.0370967	0.00783172	0.0135483	-0.00475829	0.00667521	0.030471	0.0291313	-0.0141868	0.0101119	0
134.4	-0.0320245	-0.0159054	-0.0203116	0.0089857	-0.0245362	-0.0193937	-0.00642814	0.0178176	-0.0280941	0.0209563	0
134.6	0.0106417	-0.0205709	0.000735621	0.0241078	-0.00141993	-0.0169682	-0.0378224	0.0047825	-0.0523226	0.0186344	0
134.8	0.0497053	0.018843	0.0182607	0.0576199	0.00777135	-0.0140283	-0.0274291	-0.00382548	-0.00152195	-0.0189301	0
135	0.00272329	0.00110935	-0.0269725	0.0221042	-0.0169388	-0.020121	-0.0209062	-0.00597934	0.0413497	-0.0254333	0
135.2	0.0306639	-0.0529323	-0.0353514	0.00115424	-0.000964678	0.0202318	-0.0661818	-0.00233968	-0.0275873	0.00751456	0
135.4	0.0313855	0.00938911	0.00397493	-0.000437434	0.0110467	0.0123101	-0.127859	0.00968655	0.000651344	-0.00767411	0
135.6	-0.0135381	0.00469872	-0.0047746	0.00833287	-0.00363248	-0.0215359	-0.00554501	-0.0399545	0.0826523	0.00657434	0
135.8	-0.0316143	-0.0347145	-0.0190747	0.0218969	0.00529974	0.0201289	0.0184096	-0.0309033	-0.0312032	0.0033436	0
136	-0.0156228	-0.0353827	-0.0108029	0.000923295	-0.00751757	0.044837	0.0229131	-0.00300667	-0.0357794	-0.0116537	0
136.2	-0.0025793	-0.00828422	0.00777151	-0.0129617	-0.0177481	-0.0140269	0.0440908	0.0260227	0.0798551	-0.00537941	0
136.4	0.00134124	0.00275342	0.0145637	0.000659621	0.0103452	-0.0536885	0.00507041	0.0527869	0.0529805	0.0109196	0
136.6	0.0135521	-0.00182022	0.0153887	-0.0356199	0.00458239	-0.0186662	0.0453824	-0.00547947	0.0164292	0.0171446	0
136.8	0.0195015	0.0205034	0.0610098	-0.046669	0.0257936	-0.0138307	0.0221953	-0.00604711	-0.0749946	0.00495114	0
137	-0.0182807	0.00798491	-0.00757851	-0.0361954	0.0178687	-0.00285767	-0.0526191	-0.0439514	0.0031158	0.00252699	0
137.2	-0.000564963	0.0345126	-0.0203209	0.0269223	0.00482126	-0.0137184	-0.00454718	0.0296471	0.0626823	-0.00824506	0
137.4	-0.00423496	0.0454373	0.0402172	0.0630527	0.00189894	-0.00136272	0.051429	0.0195891	-0.00334769	-0.0422245	0
137.6	-0.0151476	-0.00107543	0.0314285	0.0135204	0.00244722	0.0232815	-0.0207681	-0.0652087	-0.0428841	-0.015667	0
137.8	0.0344449	-0.0101885	0.000697	-0.0262178	0.000609195	0.012423	-0.0742099	0.0309444	-0.00820201	0.0717158	0
138	-0.0314336	0.0124684	0.0516358	-0.00489268	-0.0158213	0.0450296	0.00149861	0.0323346	-0.0302277	0.0367764	0
138.2	0.000474784	-0.00965088	-0.00828138	-0.0512827	0.00285162	0.00849321	0.0434443	-0.0357129	-0.0167539	-0.00130781	0
138.4	-0.00304731	0.000696919	0.036386	-0.0496862	-0.0282764	-0.0144475	0.0353498	-0.0182454	-0.0300766	-0.0140179	0
138.6	0.00460522	-0.0171923	-0.0265865	-0.00171155	-0.0312687	0.0182047	-0.0268164	-0.029803	-0.0307163	-0.0188793	0
138.8	0.00190921	-0.052828	-0.108086	0.00384409	-0.00698005	0.0149638	-0.0618875	-0.0547222	-0.0140493	-0.0158464	0
139	-0.0276574	-0.0253816	-0.0461725	-0.0196446	-0.0107109	-0.0384005	-0.0443625	-0.00704252	-0.0104111	-0.0248749	0
139.2	0.0166748	0.00675726	-0.0484252	0.000795552	-0.000127672	-0.0390161	-0.0380283	0.0186274	0.0154728	-0.044519	0
139.4	-0.0072579	-0.0315062	0.00586652	0.0237309	-0.00114896	-0.0207798	0.0327196	0.0142116	0.0291123	0.00233591	0
139.6	-0.0271551	-0.00369125	-0.0147581	-0.00637893	0.00108232	-0.0283675	0.00809321	-0.00382809	-0.0334115	0.00995136	0
139.8	0.0100647	0.039275	-0.00910239	0.0261432	-0.00201931	-0.00420374	-0.0336827	-0.0343503	-0.00720459	-0.0130686	0
140	0.0230696	-0.0175246	0.00714822	0.0454748	0.0140203	-0.000212364	-0.0609128	-0.0197919	0.00761302	-0.0113087	0
140.2	-0.0228609	-0.0490432	0.00913056	0.019642	0.0208075	-0.0176447	-0.0469635	0.0327591	-0.0312779	0.0157309	0
140.4	-0.0427077	0.0194175	0.0327586	0.019856	-0.00860792	-0.00325872	0.0209919	0.0367752	-0.0244822	0.0279993	0
140.6	0.00306681	-0.00257331	0.0265451	-0.00134538	-0.0119852	-0.00753181	0.0373628	-0.0129001	-0.0240186	0.0209936	0
140.8	0.0215076	0.0221866	0.00948186	-0.0142215	-0.0104525	-0.00353881	0.023673	-0.0219503	0.0244388	0.0317861	0
141	-0.00855353	0.0444849	-0.0122853	-0.0321621	0.0151382	0.020675	0.00386161	0.0300568	0.0178874	-0.00729799	0
141.2	-0.0143374	0.00382927	-0.00794816	0.00551289	0.0302899	0.0134231	-0.00425265	-0.00487694	-0.0401617	0.00347318	0
141.4	0.000854515	-0.00838427	0.0093165	0.032039	0.00408158	-0.0394215	0.0228633	-0.0143348	0.00709895	0.0244379	0
141.6	-0.00579012	0.00485896	0.00508386	0.00464388	-0.00102199	-0.0329487	0.0311323	0.0246965	0.0693261	0.0111093	0
141.8	-0.0171178	-0.022378	-0.00637224	-0.0207629	0.0360474	0.0471604	0.0200169	-0.0337732	-0.0119871	0.0146752	0
142	-0.00344375	0.018734	0.00725065	-0.0529002	0.00254258	0.0109793	0.0996761	-0.0199818	0.00271279	-0.0242506	0
142.2	0.0273067	-0.0270564	0.0194406	0.039186	0.00584455	-0.00979901	0.00350958	-0.00241001	-0.00433797	-0.000842508	0
142.4	0.037597	-0.0287953	0.0437681	0.00415821	0.00928087	0.0122892	-0.0280494	0.00720982	-0.0127872	-0.0458213	0
142.6	0.0336596	-0.00425396	0.0227543	-0.0349544	-0.0142145	-0.00463558	-0.0378229	0.00118201	0.00554058	-0.0435536	0
142.8	0.017043	-0.00442376	-0.0201902	-0.0138092	-0.0215471	-0.0188376	-0.0353924	0.0116881	-0.0196835	0.0116188	0
143	-0.00591026	0.010759	-0.0277191	-0.00513739	-0.00704255	0.0241524	0.0181099	0.0523164	-0.018349	0.016288	0
143.2	-0.00150884	0.0369718	-0.0338042	0.0403496	-0.0151113	0.0357714	-0.0163013	0.0505037	0.0944334	0.0160069	0
143.4	0.0136938	0.0297459	-0.0212132	0.0084741	-0.0218552	0.000722708	-0.0323336	-0.00539226	0.0148009	-0.0334887	0
143.6	0.00345085	0.0254954	0.0358388	0.0154354	-0.0266434	-0.0141785	-0.00428245	-0.0129628	-0.0255918	-0.0307128	0
143.8	-0.00589032	-0.00633158	0.0235768	0.0207549	0.00300463	-0.010888	0.00174943	-0.0248017	-0.0374875	0.00564206	0
144	0.00569627	-0.0280544	-0.000505361	0.000283596	-0.00123417	0.0136333	-0.0341212	-0.0439518	-0.00461208	0.0135398	0
144.2	-0.00251793	0.0118234	0.0246307	-0.00174368	-0.0159242	0.0234415	-0.0323021	-0.0301631	0.0584653	8.12419e-05	0
144.4	-0.0318693	0.0435858	0.0213106	-0.00178722	0.0130437	-0.00395075	0.0343107	-0.00382838	0.0514139	0.0123076	0
144.6	-0.0114269	-0.0153616	-0.0163472	-0.0284342	0.000332904	0.00278944	0.0471216	0.00668214	0.0251162	0.0382366	0
144.8	-0.00465286	-0.0296574	-0.00270563	0.0419763	0.0444383	0.0137995	-0.00199418	0.0222947	0.0542679	0.00630886	0
145	-0.0116282	0.0284949	0.000948316	0.0620854	-0.00430512	0.00136196	0.0342491	0.00457607	-0.00581311	-0.0350558	0
145.2	0.0122761	0.0174544	0.00205198	-0.0336304	-0.0257428	-0.00231697	0.0387761	0.0107785	-0.0200984	-0.0147417	0
145.4	0.00501388	-0.0211808	0.000986875	-0.0502979	0.00502499	-0.00144131	0.00791568	0.0129215	0.0232868	0.0205018	0
145.6	-0.0181989	-0.00692649	0.00392297	0.00592598	0.0254566	-0.00416277	0.0273581	0.0138728	0.00719601	-0.00312783	0
145.8	0.0135338	-0.0186494	-0.0071062	-0.0499244	0.0478924	-0.000980006	0.0322692	0.0474477	-0.0361544	-0.0277685	0
146	-0.0243685	-0.0462077	-0.0947397	-0.0246083	0.00389097	-0.0171603	-0.0105486	-0.0130485	-0.0487674	0.0337761	0
146.2	-0.00659054	-0.00424635	0.00480513	0.0315113	0.0044986	0.0110517	-0.0158568	0.00984229	-0.0450325	0.0314953	0
146.4	-0.000991686	-0.0126664	0.0460581	0.000730236	0.00967015	0.00342679	-0.0499689	0.00685302	-0.00517922	0.000703641	0
146.6	0.000952977	-0.0270247	-0.00572035	-0.0210781	-0.0254038	-0.00545265	-0.0253534	-0.0243859	0.0322208	-0.00690852	0
146.8	0.0151056	0.0143008	-0.00785242	-0.0190908	-0.0225282	-0.00114647	0.0023619	-0.00681152	0.0270948	0.0143783	0
147	0.0123344	0.0567866	0.0423901	-0.0203351	0.0169615	-0.0161466	-0.0277321	0.0356741	0.00592937	0.018531	0
147.2	0.0197047	0.0520996	0.0607337	0.0506785	-0.0134565	0.0124219	0.0314665	0.0295495	0.00529829	-0.0298283	0
147.4	0.0423267	0.000790866	0.024382	0.0453671	0.00391562	0.087954	0.0415245	-0.0264451	0.00647008	-0.0268958	0
147.6	0.0155952	0.0122261	-0.0343405	-0.0297626	-0.00779899	0.0309288	0.0348549	-0.0263163	0.0126987	-0.0166995	0
147.8	-0.00954409	0.0432716	-0.0156499	-0.0323677	0.0044748	-0.00547342	0.0500174	0.0168797	-0.0483264	-0.00469371	0
148	0.00069663	0.0352503	-0.00198833	-0.00173192	0.0101675	-0.00266188	0.0170532	0.0236612	-0.0682611	-0.017943	0
148.2	0.00346795	0.00186044	-0.0266676	0.00244183	-0.00827942	-0.00336169	-0.0242415	-0.0329614	-0.0184574	-0.016577	0
148.4	-0.0118472	-0.0377091	-0.00833982	0.0205758	0.00547525	0.00924251	-0.00365577	-0.074051	-0.0147594	0.0414306	0
148.6	0.00184401	-0.0644013	-0.00917224	0.0155759	0.00378105	-0.0340243	-0.0330031	-0.0276833	0.0127766	0.0458807	0
148.8	-0.0078618	0.00602216	-0.0253427	-0.0286714	-0.0242253	-0.00789433	-0.0228854	-0.0161282	0.0951513	0.0081928	0
149	-0.0130109	0.0101544	0.0119368	-0.00377092	-0.0239951	0.0371533	0.00970408	0.0196379	0.0432736	-0.0268754	0
149.2	-0.0198205	-0.0472481	0.0163192	-0.00482666	-0.00415329	0.0103047	-0.0128306	0.00920522	-0.0206412	-0.00935479	0
149.4	-0.0280204	-0.0288356	-0.00840487	-0.0127244	0.000244368	-0.0235948	-0.0235427	-0.00468183	-0.00112518	0.0164659	0
149.6	-0.020871	0.0224187	0.0028865	0.0159667	0.000801041	-0.0204514	-0.0357259	0.0325361	0.0251726	0.0118542	0
149.8	-0.00997851	-0.00917303	0.0159925	-0.0135323	0.0133323	-0.029623	-0.083051	0.0272987	0.0128751	0.001219	0
150	-0.0108572	0.00262862	0.00665644	-0.0269683	-0.0116217	0.0159174	0.0655419	0.0230534	-0.0201309	-0.0381148	0
150.2	-0.00718447	-0.039291	-0.0483346	0.0226629	-0.0588945	0.0291925	0.00919512	0.0588096	0.001101	-0.00904637	0
150.4	0.00925568	0.0460227	0.00916696	-0.00220055	-0.0215643	-0.00869986	0.00786599	0.0134046	-0.0406775	0.0450948	0
150.6	0.012579	0.0829067	0.0622294	0.0154658	0.0272442	-0.00689556	0.0266974	0.0268792	-0.0437424	0.021221	0
150.8	0.0144756	-0.00145897	-0.00453324	0.0516798	0.0272722	-0.0119876	-0.00119874	0.0403088	-0.00378503	-0.0152045	0
151	0.016297	-0.0304974	-0.0423454	0.00260523	0.0197762	-0.0455153	0.0299826	-0.0461617	-0.025562	-0.0121707	0
151.2	0.00382904	-0.0104163	0.0313986	0.0246046	0.00442111	0.0169094	0.0345933	-0.0076498	-0.0112339	-0.0605317	0
151.4	0.0757735	0.0672287	0.00610038	0.0213814	0.00185976	-0.00512041	0.0292531	-0.0240497	0.0196796	-0.023673	0
151.6	0.0398225	0.0341333	-0.0237518	-0.00201071	-0.00109187	-0.0165418	0.00060368	-0.0335987	-0.00223496	-0.00435364	0
151.8	0.00114298	-0.00742649	-0.00272697	-0.0200248	-0.00994038	-0.00791522	-0.000558694	-0.0546062	-0.0612507	-0.023191	0
152	0.00240992	-0.0247777	-0.00302633	-0.0187616	0.0190203	0.0119705	-0.00946116	-0.0360812	0.0077666	-0.00554765	0
152.2	-0.0176424	-0.0473795	-0.0144407	-0.0135333	0.0270375	0.0177217	-0.0272511	0.00777639	0.0769709	0.0189194	0
152.4	-0.0374073	-0.0391065	-0.00016289	-0.0251754	-0.0245825	-0.00991894	-0.00475707	-0.0159692	-0.0319939	-0.00971204	0
152.6	-0.0403224	-0.0395933	-0.0469128	-0.0362163	0.0192785	-0.000769139	-0.00468657	-0.0265606	0.00294196	0.0115709	0
152.8	-0.0376928	-0.0585052	-0.0186655	-0.0395145	0.0221446	-0.0100942	0.0176047	-0.0291332	0.0445658	0.0739709	0
153	-0.0242255	-0.0179209	-0.0223544	0.00905502	0.0168877	-0.0209202	-0.0414889	0.0249666	0.0665014	0.052708	0
153.2	-0.0335199	-0.030648	-0.0171813	0.00352693	0.00268958	-0.0255016	-0.0866131	0.0285446	0.0296103	0.00662032	0
153.4	-0.0244054	-0.0363883	0.021891	-0.0164744	-0.00780566	-0.0229804	-0.0391989	-0.0133626	-0.0333693	0.0164028	0
153.6	0.00457396	0.00690132	0.0276915	0.00814035	-0.0261069	-0.0131336	0.00240013	0.00325991	-0.0442863	0.0228518	0
153.8	-0.0161179	-0.024308	0.00833053	-0.0227982	-0.0657678	0.00845954	-0.00600873	0.0433098	-0.0247154	-0.0311036	0
154	0.00458994	0.0575253	0.0157356	-0.024658	0.00728796	0.0531295	0.0425461	0.0381751	-0.0109339	-0.053158	0
154.2	0.00379526	0.0815946	0.0435549	0.0536899	0.0113727	0.015158	0.00405434	0.0165562	0.0561155	-0.0358224	0
154.4	0.0176847	0.0362541	0.00797903	0.0545206	-0.00416004	0.0113349	-0.00052948	0.024036	0.0156419	-0.0271215	0
154.6	0.0293478	0.0188241	-0.0171519	0.0170525	-0.00346652	0.0214244	0.000814791	-0.00635155	-0.0296545	-0.00815662	0
154.8	0.0286202	0.0102067	0.00574368	0.0191531	-0.0116895	0.0106729	-0.00351819	-0.00909269	-0.00537981	0.0137043	0
155	0.0277356	-0.0170499	0.00875187	0.0155006	-0.0151966	0.00789465	0.0486725	0.04825	-0.00331798	0.00949446	0
155.2	-0.00491137	0.0143562	0.00938452	0.00213901	-0.00598338	-0.0173261	0.0602511	-0.0168494	0.00304806	0.014749	0
155.4	-0.00463624	0.0216397	0.0171272	0.001821	-0.00706941	0.0135578	0.0470497	-0.0148786	-0.0267397	0.00734634	0
155.6	-0.000651075	0.0470823	-0.0142719	0.0168014	0.0298688	-0.0330765	0.0235169	0.0185448	0.00778184	-0.00023097	0
155.8	0.0037282	0.0184647	0.00605144	-0.00605777	0.0412242	-0.0207985	0.00102273	-0.00272978	0.0419843	-0.0262228	0
156	0.00913018	-0.0100419	0.00452621	-0.0267101	0.0336595	0.0110757	-0.0195007	0.00464783	0.0248558	-0.0254435	0
156.2	0.0177779	0.0250104	-0.0402653	-0.00185742	0.0222437	-0.0144751	-0.0135943	0.0474685	-0.0124826	0.00657458	0
156.4	0.0215329	0.012525	-0.0144494	0.0144378	-0.00562535	-0.00123718	0.00855616	-0.00877879	-0.0260639	0.0143061	0
156.6	-0.00753455	-0.0574435	-0.0166174	0.0065197	0.0228542	-0.00373641	-0.0396038	-0.0960597	0.00250585	0.0401574	0
156.8	0.0143264	0.0230504	0.0124665	0.0253182	-0.0113444	-0.00367555	-0.0558978	-0.0721525	-0.0443894	0.0436863	0
157	0.028038	0.0147129	-0.00482857	0.0195159	-0.00378073	0.0251612	0.0125122	0.0364291	0.00494087	-0.00514244	0
157.2	0.00141623	0.00217526	0.0219408	-0.00555273	0.0264007	0.0208397	0.0328126	0.0197141	0.0445167	-0.0156767	0
157.4	0.00328745	0.0240981	0.0688453	-0.00913684	0.00291596	0.0065579	0.0184044	-0.00870027	0.0141842	0.00766038	0
157.6	0.0275148	-0.0110092	0.0229777	0.00184439	-0.0265466	0.0168476	0.0312207	0.0588582	0.0243753	0.00412156	0
157.8	-0.0105314	-0.00877175	-0.0135295	0.0148153	-0.00237698	-0.00532391	-0.00657934	0.00733465	0.0314755	-0.00430593	0
158	-0.0163159	0.0100732	0.0392597	0.0539574	-0.0135002	0.00545535	0.00526781	-0.0015925	-0.0387769	-0.0502705	0
158.2	-0.00604025	0.0310968	0.00565443	0.0153242	-0.0456917	0.0350859	0.0534589	0.0298325	0.00210179	-0.0477148	0
158.4	0.00488046	-0.0172775	0.0251065	-0.00363935	0.0102682	0.00287867	0.0230608	0.020397	0.0252115	0.0163418	0
158.6	-0.0179085	-0.037254	0.0458843	0.0131935	0.0466334	-0.0388776	0.0128754	-0.0169999	-0.0065519	0.0326974	0
158.8	-0.0518783	-0.0280431	-0.01286	-0.0410445	0.00389667	-0.0131375	-0.000245679	-0.0186585	-0.0088051	0.0290653	0
159	-0.0192553	-0.0563881	-0.0527275	-0.106613	-0.0189997	0.0225552	-0.073653	0.0145842	-0.0068865	0.0503185	0
159.2	0.0441049	-0.0119816	-0.0484547	-0.0230098	-0.0279034	-0.00676181	-0.0133181	0.0127037	-0.0493747	-0.0160373	0
159.4	-0.00352599	-0.0409889	-0.00167366	-0.0261356	-0.00944892	-0.0090097	-0.0570065	-0.0442907	-0.0365548	0.0287794	0
159.6	-0.019512	-0.00888256	-0.0346851	-0.0135909	0.000318192	0.0149414	0.0059041	-0.0162749	-0.00648312	-0.0112574	0
159.8	-0.00684743	0.00882464	-0.0409438	-0.0434969	-0.00565945	0.009285	0.00930336	0.00253037	0.0253215	-0.0291354	0
160	-0.0215512	0.0107003	-0.00529904	-0.0202602	0.00721499	-0.00661882	-0.00492454	-0.0259862	-0.0033704	0.00465732	0
160.2	-0.0154895	0.019463	0.0113227	0.069382	0.0163694	-0.00246483	0.0567891	-0.032753	-0.0309677	-0.00892089	0
160.4	0.0277789	0.00374504	0.024253	0.0540847	-0.0057083	0.00721111	0.0120577	-0.00142332	0.0657432	-0.0224227	0
160.6	0.00126871	0.0968656	-0.0106991	0.0932169	0.0191309	0.0294752	-0.0326831	0.0541462	0.083814	-0.00489202	0
160.8	-0.0163151	0.055057	0.00258814	0.0371079	-0.00429746	-0.00280581	-0.00864824	-0.00313952	-0.0285714	0.0119663	0
161	-0.029267	-0.0314938	-0.00617603	-0.0308527	0.00145806	-0.0300142	-0.026356	0.0158668	-0.00788863	0.0230751	0
161.2	-0.0324795	-0.0469103	-0.0111314	-0.0470161	0.00215573	-0.0156609	-0.0709442	0.0312527	0.0663153	0.00700661	0
161.4	-0.0159028	-0.0317246	0.000145489	-0.033345	0.0107197	-0.0264989	-0.0358445	-0.018975	0.030878	0.00972658	0
161.6	0.000980394	-0.03015	-0.0324692	-0.0273827	0.0384461	-0.0687978	0.0243582	-0.0195621	-0.037622	0.0374006	0
161.8	-0.00466101	-0.0247454	-0.0682999	-0.0526685	-0.0197979	-0.0426213	-0.0225375	-0.00286259	-0.0477378	0.00388457	0
162	-0.0322684	-0.0570544	-0.019543	-0.0512367	-0.0329128	-0.00574108	-0.0355376	-0.0456099	-0.0619393	-0.00305107	0
162.2	-0.000547844	-0.0387059	-0.00390475	0.01986	-0.0152204	-0.0256459	-0.0240566	-0.0136365	-0.0238058	-0.0224885	0
162.4	0.0236163	0.00556031	0.0449132	-0.0177404	-0.0101433	-0.00538385	0.0217864	-0.00965189	-0.00907866	-0.045889	0
162.6	0.0227847	0.037145	0.0367563	-0.0228706	0.0143106	0.0378687	0.0595191	-0.0341738	-0.0240461	-0.0173683	0
162.8	0.025341	0.0502605	-0.0185315	0.0658843	0.0303387	0.0353667	0.0437964	-0.0163712	0.00762291	0.0154647	0
163	0.0141088	0.0441196	0.0127479	0.0450107	-0.012152	0.0159687	-0.00430041	0.00805138	0.0397454	0.00648228	0
163.2	-0.0106188	0.026499	-0.000105986	-0.000106226	-0.0108618	0.00690175	-0.0495175	0.0175999	-0.01836	0.0359513	0
163.4	-0.0182023	-0.00814702	0.0197638	0.0223969	0.0481466	-0.00325699	-0.0360822	0.0204331	0.0219491	-0.0117577	0
163.6	-0.00051965	0.00459865	0.00395341	0.0273802	0.0279847	-0.0209809	0.0327963	0.00635638	-0.027272	0.00350158	0
163.8	-0.0151985	-0.0460801	0.0116909	0.0140588	0.00174759	0.0136589	0.0232905	0.0232232	-0.0625991	0.0234311	0
164	-0.0316409	-0.0608765	0.015653	0.0248406	-0.00805305	0.0301985	-0.0274558	0.0371907	0.00101366	0.0236891	0
164.2	-0.0095829	0.0203574	-0.0222471	0.00352366	-0.0242833	-0.0178539	-0.0116442	0.0146648	0.0325493	0.0240134	0
164.4	-0.00194743	0.0037455	-0.0240728	-0.0628802	0.00291741	-0.0140413	0.0262043	1.37878e-06	-0.00375276	-0.0247054	0
164.6	0.0001838	-0.0138761	-0.0356384	-0.00927514	-0.000796473	0.0253759	0.048252	-0.0275825	0.0226833	-0.0348851	0
164.8	0.0257418	-0.0140191	0.00674666	-0.0117498	-0.0108909	0.00879988	-0.00283243	0.0239048	0.0615218	-0.0514921	0
165	0.0514057	-0.023522	-0.0043983	-0.0366841	-0.0325067	-0.0312797	-0.0153759	0.026009	-0.0225718	-0.0223472	0
165.2	0.0286721	-0.0392022	-0.0120545	-0.00331586	-0.0235248	-0.00218368	0.0205648	-0.0400045	-0.0668788	0.00169876	0
165.4	-0.0029405	-0.0285587	0.0132538	0.0152007	0.0129841	0.0567421	0.0429382	-0.0392606	0.0153294	-0.0163452	0
165.6	0.0144925	0.033995	0.0132644	0.00299991	0.0232619	0.0481829	0.0305579	0.0170516	0.0779985	-0.030321	0
165.8	0.0338383	0.0863366	0.0474922	0.071294	0.00652471	0.0200424	0.0166008	0.00308184	0.0588027	-0.0352654	0
166	0.0322147	0.0128929	0.0841655	0.0583146	-0.0310403	0.0395822	0.0698495	0.0759901	-0.0200078	-0.018489	0
166.2	0.0228545	0.102587	0.0300712	0.0292583	-0.00514606	0.00873761	-0.0220083	0.0765516	-0.024688	0.0200799	0
166.4	-0.012588	0.0422679	0.00907557	-0.0310912	0.0253407	-0.0193785	-0.0192699	0.0249362	-0.0102356	0.026153	0
166.6	-0.0329382	-0.0561966	0.0171456	-0.057999	0.0191916	-0.0277593	0.0318095	-0.00358721	-0.0104106	0.0222328	0
166.8	-0.0203034	0.0201725	-0.00708721	0.00610913	0.00119489	-0.0304648	-0.00732935	-0.00396066	0.0177009	0.0485337	0
167	-0.0228505	0.0220864	-0.0204563	0.0272031	0.00259726	-0.0120376	-0.0189765	-0.00414857	0.0253974	0.0630022	0
167.2	-0.0267402	-0.0458194	-0.0279859	-0.0679742	0.0289094	-0.022888	-0.0432761	-0.0368725	-0.0516003	0.0335765	0
167.4	-0.0123211	0.00132357	0.00490922	-0.00463738	-0.0180687	-0.0345445	-0.014744	-0.0528133	0.000672411	0.0168673	0
167.6	-0.0173077	-0.0017536	0.0236281	0.0141746	-0.00628742	0.00663471	0.00743049	-0.0719145	0.0132947	-0.0325021	0
167.8	-0.00118327	-0.00509262	-0.0155903	-0.00310401	0.00445242	0.00564427	-0.0108484	-0.00840386	-0.00174689	-0.0302603	0
168	0.0074936	0.0120832	-0.0163875	-0.00837399	-0.01622	-0.00732297	-0.026095	-0.00143428	-0.00469535	0.00177136	0
168.2	-0.0201265	-0.00463708	0.0271305	-0.0162859	-0.00759774	0.0207577	-0.0164788	-0.0740178	-0.0143532	-0.0119696	0
168.4	-0.00547348	-0.00625052	-0.0175841	0.0194554	-0.00265033	-0.00606875	-0.0267656	0.0297521	0.0256769	-0.00918675	0
168.6	0.0163938	-0.0444673	-0.0340342	0.00824199	-0.00733777	-0.023782	-0.0581682	0.0693541	0.0677323	-0.00522205	0
168.8	-0.0235277	-0.020708	-0.0219763	-0.00275646	-0.00217792	-0.0108512	-0.0220636	0.0148132	0.0270941	-0.0141525	0
169	-0.0301091	0.0209912	-0.0185166	0.00867646	-0.00391781	-0.00711301	-0.00459414	-0.0488022	-0.00989815	-0.0426781	0
169.2	-0.0140373	-0.00123453	-0.00160768	-0.0146664	0.00409337	-0.0123075	-0.0238978	-0.0186869	-0.0570617	-0.0435564	0
169.4	-0.010168	-0.0170186	0.0135113	-0.011642	0.000775832	-0.0190098	-0.0101145	0.0211371	-0.070147	0.00382694	0
169.6	0.0177599	0.0212355	-0.0102406	0.0514016	-0.0212289	-0.0102758	0.034787	-0.0226754	-0.00297304	0.0373464	0
169.8	0.0467959	-0.00550588	-0.0211467	-0.00320877	0.00186908	0.0403501	0.038419	-0.00236613	-0.00441307	0.0169901	0
170	0.0317368	-0.00884234	-0.00295348	-0.0742919	-0.0179558	0.0258791	0.0116528	0.0480138	0.000579442	0.0180217	0
170.2	0.0195608	0.0107228	-0.0121751	0.0118874	-0.00286542	-0.0308336	0.00936321	0.0228462	-0.0451397	0.0184855	0
170.4	0.023182	0.0274572	0.00683174	0.0347405	-0.00612127	-0.0294603	0.00943025	-0.0022168	-0.0276037	0.0384532	0
170.6	0.0109881	0.0200102	0.0128833	-0.0112282	-0.0111613	0.0284912	0.0176902	-0.00344481	0.0121026	0.000818523	0
170.8	-0.00897337	0.0168364	-0.00714598	-0.0191816	0.0160479	0.0384113	0.0435448	0.00574296	0.025313	-0.0572864	0
171	-0.00522764	0.0176836	0.0123158	-0.0396818	0.0117088	-0.0119266	0.0369335	0.00697919	0.049397	0.00292294	0
171.2	-0.00204807	-0.0481107	-0.0174087	0.0132667	-0.00050265	0.00884238	-0.00567728	-0.0804706	-0.0495734	0.027854	0
171.4	0.0179196	0.0185998	-0.00186381	0.0263025	0.0203381	0.0384113	0.000299496	0.00263003	-0.0174566	-0.00273006	0
171.6	-0.00773688	0.0241095	0.0171646	0.00743618	0.027925	0.0234421	-0.0274762	0.0240592	0.0109732	-0.0326273	0
171.8	-0.0289413	-0.00515958	-0.00173062	-0.00397549	-0.0192173	-0.0183091	-0.0504146	-0.0203038	0.0242431	0.00704937	0
172	-0.0210111	-0.0626392	-0.0214218	-0.0329216	-0.0316848	-0.0343704	-0.0215653	-0.0416673	0.0172232	0.0275138	0
172.2	-0.0100421	-0.11865	6.05231e-05	-0.0430533	0.0126375	0.00341488	0.0149009	-0.0229658	-0.028189	-0.0217601	0
172.4	0.0119116	0.00310762	0.0206719	0.0348011	-0.00467216	0.0356864	0.0220831	0.0357827	0.00759135	-0.0129673	0
172.6	-0.01373	0.0423093	-0.0220515	0.0421245	0.00365064	-0.0264115	-0.0111882	-0.0383617	0.0623197	-0.00821517	0
172.8	-0.0264392	0.037665	0.026591	0.0104774	-0.0003825	-0.00941824	-0.013368	0.0462322	0.0452377	-0.0118501	0
173	-0.00862902	0.0469496	0.0284882	0.00153107	0.00357726	-0.0100947	-0.00281333	0.0691677	0.0373527	-0.00637657	0
173.2	0.0146699	0.0100125	0.0127109	0.0439399	0.0254139	-0.0119691	0.0375442	0.0247771	-0.00940207	-0.000922819	0
173.4	0.0284604	-0.0312789	0.0338739	0.0702047	0.028835	0.00869277	0.0437655	0.0437151	-0.0483137	0.016245	0
173.6	0.0176837	-0.00863048	0.0118984	0.0108642	0.00745088	-0.0166156	-0.0336681	0.0384992	0.00113954	0.0387862	0
173.8	-0.0262661	-0.025482	0.00017054	-0.0470311	-0.00167528	-0.0259036	-0.0323727	-0.00639619	-0.0382745	0.0144385	0
174	-0.0243885	0.00497585	0.0151497	-0.0287793	-0.0178281	-0.0541938	-0.0055149	-0.00896953	-0.0187685	0.0202269	0
174.2	0.0194099	-0.0264294	0.0264679	0.00684391	-0.0221445	-0.0361559	-0.0116944	-0.0499637	0.00968947	-0.00981158	0
174.4	0.0342024	-0.0156365	-0.0182665	0.0480479	0.000929243	0.0134898	0.031665	-0.00223455	-0.0188032	-0.00305913	0
174.6	0.00148169	0.0208994	-0.0677728	0.00896873	-0.00116812	0.0514475	0.0443048	0.0468094	0.00481582	0.00981162	0
174.8	-0.0234239	0.0213373	-0.0478541	-0.0522366	-0.0272158	0.0494814	-0.0316267	-0.0119387	0.0544997	-0.0132863	0
175	-0.0148085	0.0464324	-0.0190915	0.0160484	-0.0103879	-0.00436181	-0.0363223	-0.0109621	-0.0192732	0.00233352	0
175.2	-0.0138768	0.00127267	-0.0508271	0.0050984	-0.00664776	-0.0370455	0.0232845	0.0311843	-0.0217544	-0.0160568	0
175.4	0.0261895	-0.00780922	0.0225628	-0.00499074	-0.0226584	0.0348832	0.00437513	0.00144172	0.0179081	-0.0294669	0
175.6	0.019226	-0.00241194	0.00212278	-0.013213	-0.00699761	0.0274601	-0.0333101	-0.0190938	0.0109219	0.0614809	0
175.8	-0.00802313	-0.00154185	-0.0293735	-0.00134103	0.0302503	0.0311777	-0.0563811	-0.0154295	0.00954329	0.0599442	0
176	0.00132774	-0.00232858	0.0159598	0.00180067	0.0281425	0.0541797	-0.0542369	-0.00782409	-0.010012	-0.0266964	0
176.2	0.0123402	-0.0052561	0.0327051	-0.0279396	0.00152312	-0.0174131	-0.0158336	-0.0153867	-0.0349368	-0.0133795	0
176.4	0.00183162	0.000980976	0.0416611	-0.00144545	0.0146318	-0.0398879	0.0173829	-0.0667401	0.0398446	-0.00956694	0
176.6	0.0122958	-0.00348596	0.0669112	0.047901	-0.00313226	0.0073731	0.0505476	-0.0439956	-0.0323179	-0.0362597	0
176.8	-0.000272303	0.000914175	-0.000656398	-0.0202477	0.00738296	-0.037091	0.0859859	0.0331622	0.0513393	-0.00295332	0
177	0.00874384	0.0243878	0.0205068	-0.041448	0.0162719	-0.0112267	0.0773011	0.0520181	0.0690558	-0.00763761	0
177.2	0.00982465	-0.0058386	0.0368481	-0.0134428	0.0063922	0.0198662	0.00916162	0.014154	-0.0196793	-0.0103319	0
177.4	0.00894769	-0.0252865	-0.0240605	-0.0222467	-0.00257954	-0.024212	-0.0374148	0.0113219	-0.00850043	0.00729341	0
177.6	0.0316653	0.0414128	-0.0194947	-0.00161098	-0.00660012	-0.0116062	0.0139375	0.0298262	0.0379549	-0.0284008	0
177.8	-0.0312389	0.000985561	-0.0399052	0.0428774	-0.00525102	-0.000716071	0.0685615	-0.0173679	-0.0366183	-0.0124252	0
178	-0.0393331	-0.0363018	0.00020972	-0.00178114	-0.0192894	-0.0262874	-0.0254133	0.00664917	-0.0271992	-0.00332341	0
178.2	-0.0430789	-0.0284527	0.00613935	-0.041171	-0.0134948	-0.0230972	-0.0864031	-0.0271141	-0.0241854	0.023472	0
178.4	-0.0333969	0.00937577	-0.00783759	0.0168287	0.00218768	-0.0112714	-0.0452342	-0.0426283	-0.0201907	0.00151633	0
178.6	-0.0263675	0.00973468	-0.0125369	0.0650401	0.00942958	-0.0366366	-4.75936e-05	-0.0179636	-0.001052	-0.00789666	0
178.8	-0.0397485	-0.0363324	-0.0390997	0.00325834	0.00703803	-0.0366856	-0.0162328	-0.023564	0.00243345	0.0243776	0
179	-0.0188689	-0.0297065	-0.0550709	-0.0615907	-0.00355216	0.0374408	-0.0477767	-0.0172311	0.00147079	-0.00858129	0
179.2	0.00343476	0.0136652	-0.00139577	-0.041482	-0.00288354	0.0384034	-0.0347946	-0.0119441	-0.0265496	0.0266331	0
179.4	0.0293112	-0.0734418	-0.0166409	-0.0172621	-0.00320394	0.00834048	-0.00789599	-0.00532544	0.00163646	0.0340849	0
179.6	0.00640596	-0.0519939	0.0199325	0.00579288	-0.029981	0.00776375	-0.00216144	0.0324286	0.00163616	-0.0182213	0
179.8	0.0145735	0.0458462	0.00965128	0.00236532	-0.00452228	0.0120783	-0.00215631	0.0487365	-0.0169161	-0.0175116	0
180	0.0332209	0.0674223	-0.0234327	-0.0178642	0.0310679	-0.00193515	0.00327047	0.0178602	-0.0137746	0.0245027	0
180.2	-0.00791931	0.0283097	0.017189	-0.0197454	-0.00280375	-0.012159	0.0192557	-0.00449612	-0.00480108	0.00138728	0
180.4	0.0062225	-0.0193929	-0.043162	-0.0177526	-0.00315669	0.0023007	0.0396035	-0.00165746	0.0138248	-0.0221585	0
180.6	0.0156959	0.0247243	0.00511928	0.0273296	-0.0165175	0.043986	-0.0237714	-0.0165192	-0.00706677	0.0205888	0
180.8	-0.0063421	-0.047596	0.0182578	-0.00673543	0.00955618	0.0100494	-0.0139347	-0.0315338	-0.0437868	0.00351926	0
181	0.00736341	-0.00402205	0.0225064	0.0275918	-0.0160107	0.00425292	0.0749977	0.0053759	0.0156265	-0.0259324	0
181.2	0.0564963	0.0585789	0.0443784	0.0673226	-0.0354596	0.0139836	0.0787057	-0.0201088	0.0525611	-0.0265462	0
181.4	0.0226475	0.0118235	0.0159163	0.0144521	0.016147	0.000502518	0.00428864	-0.0484161	0.0174111	-0.0107271	0
181.6	-0.0644988	0.0549245	-0.0115681	0.00365334	0.0340601	0.0129845	-0.00562299	0.0637892	0.0342073	0.0176649	0
181.8	0.0194741	0.0572087	0.0736327	0.0223965	0.0103554	-0.0194421	-0.0192244	0.0458501	-0.00580671	0.00606149	0
182	0.0195341	-0.0166197	0.041669	0.0120409	-0.00982013	-0.00160586	-0.0188306	0.0260716	-0.032292	-0.0225073	0
182.2	-0.0020096	-0.00492429	-0.0142615	0.0161038	0.0116716	0.00806207	-0.00743735	0.0658441	0.00452747	-0.00578213	0
182.4	0.00180593	0.0127032	0.0193477	0.00724338	-0.0119055	-0.00174213	-0.0038262	0.00750729	0.0131629	0.00605238	0
182.6	0.0269804	0.0155411	0.0166422	0.0143969	-0.0369587	-0.00273541	0.0612137	-0.0213678	-0.019628	-0.0154742	0
182.8	0.0541053	0.0201473	-0.0387479	0.0367464	0.00484487	0.000535884	0.0879202	0.0464351	-0.00657052	-0.0242601	0
183	0.0399021	-0.0175191	0.0274642	-0.0119133	0.0148732	0.00571306	-0.0637801	-0.0403098	0.0313267	-0.0100107	0
183.2	0.0463222	0.112078	0.0310998	-0.00768393	0.0195137	0.0235681	-0.00572799	-0.0279409	-0.00569648	-0.00118639	0
183.4	0.0469586	0.0420737	0.0100755	0.0154113	0.0340717	0.0129023	0.00556451	0.0290432	-0.00694938	0.0218793	0
183.6	0.0252409	-0.0397713	0.0119823	0.0555264	0.0487058	0.0147799	0.022976	0.0281436	0.027794	0.0416293	0
183.8	0.018863	0.0588177	0.0128058	0.0414895	0.0259438	0.0304485	0.0112761	0.0133863	0.0329772	0.0338892	0
184	0.0422407	0.136365	0.0661819	0.0284726	0.0075349	0.0535776	0.00905666	0.0179419	0.0524044	0.0284834	0
184.2	0.0576479	0.0485021	0.133476	0.0893807	0.0385047	0.067352	0.0783389	0.0223927	0.0892617	0.0349707	0
184.4	0.0541889	0.0260301	0.0334698	0.0766634	0.0362343	0.0255894	0.00378303	0.047821	0.0249308	0.0044663	0
184.6	0.0639238	0.0982852	0.0548628	0.0991357	0.0175474	0.038459	0.0148537	0.025292	0.0453688	0.012997	0
184.8	0.0258225	0.104018	0.0510978	0.11025	0.0160666	0.0131454	0.0307625	0.0220716	0.0420372	0.0287692	0
185	0.036624	0.0333703	0.0458822	0.0628184	0.0252307	0.0120083	0.0427675	-0.00838524	0.0309033	-0.00221177	0
185.2	0.084204	0.0177832	0.0751298	0.00647202	0.00518955	0.0352248	0.0539757	0.00858861	0.0904928	-0.0115123	0
185.4	0.0829951	0.0807357	0.0938926	0.0271617	-0.0121218	0.0276769	0.0608611	0.0663522	0.0879671	0.0194568	0
185.6	0.0739904	0.100828	0.0991138	0.0928829	0.0222737	0.0333499	0.0747974	0.0393793	-0.0257974	0.0157144	0
185.8	0.0830369	0.0774957	0.07228	0.0742091	0.0293116	0.0581673	0.0385683	0.0969139	0.0767209	0.0320151	0
186	0.0601482	0.141943	0.0740611	0.121111	0.0679789	0.0782106	0.0817311	0.124408	0.107296	0.0226003	1
186.2	0.107264	0.150425	0.178146	0.132693	0.113278	0.0797375	0.149208	0.106284	0.13806	0.0989111	1
186.4	0.161898	0.173855	0.21806	0.125995	0.137506	0.0850952	0.138392	0.0837346	0.137312	0.156528	1
186.6	0.15729	0.154227	0.152354	0.15894	0.128171	0.0841958	0.106817	0.0950049	0.0825764	0.151538	1
186.8	0.129591	0.0594408	0.127644	0.169174	0.111171	0.072737	0.133196	0.124925	0.0709551	0.1359	1
187	0.103593	0.133119	0.140029	0.113403	0.133104	0.0741381	0.139788	0.113889	0.0831798	0.0741624	1
187.2	0.118365	0.124845	0.110954	0.0710821	0.131549	0.0248218	0.101248	0.0928465	0.0684181	0.107718	1
187.4	0.0514123	0.0430365	0.0950066	0.0971152	0.101464	0.00918951	0.115019	0.0801632	0.0769339	0.109971	1
187.6	0.0499447	0.0138136	0.0930957	0.0606144	0.0572295	0.00444303	0.117285	0.00511678	0.0743246	0.0713984	1
187.8	0.0615643	0.0244775	0.0925451	0.0577135	0.0461609	0.00434158	0.0865684	-0.0011897	0.0383145	0.0689706	1
188	0.0189257	0.0240164	0.0858588	0.0893225	0.0302972	0.0161942	0.0655572	0.0417657	0.0449935	0.0578779	1
188.2	0.0093916	0.0161334	0.0610081	0.0279593	-0.0177323	0.0239492	0.0717094	-0.0291805	0.106944	-0.00141747	1
188.4	-0.024991	0.00561414	0.0211865	0.0395646	0.0157595	0.0241035	0.0825392	-0.0511193	0.0899799	0.0198149	1
188.6	-0.0360007	0.0719562	-0.0290306	0.00835806	0.00491127	-0.0529432	-0.0060797	-0.0418182	0.0469891	0.0302772	1
188.8	-0.0417908	0.062324	0.00110694	-0.03543	-0.0106695	-0.0472722	0.0123822	-0.0301608	-0.0323956	-0.00994006	1
189	-0.0264395	0.00367331	0.0362134	0.00078555	-0.012114	-0.0337685	0.0176836	-0.0274583	-0.0602297	-0.00478992	0
189.2	0.0037139	0.00241904	0.0189623	0.0521752	-0.0316097	-0.0297489	-0.0225703	-0.0291132	-0.040902	0.0148557	0
189.4	4.5545e-05	0.0439998	-0.00099825	0.000541951	-0.0378973	-0.00923495	-0.00112754	-0.0239243	-0.0182168	-0.0125616	0
189.6	-0.0384223	0.0345285	0.00261627	-0.063695	-0.00629644	-0.0464317	0.0366816	-0.013999	0.0202982	-0.0134028	0
189.8	-0.0404505	-0.0365372	-0.00233025	0.0227443	-0.0454288	-0.0524936	0.0736292	-0.0179796	-0.0113325	0.00867993	0
190	0.000942407	-0.0144964	-0.0347636	-0.0176572	-0.0599547	-0.0795403	0.031366	-0.0338987	-0.00494215	0.0127773	0
190.2	-0.0338225	0.0101756	0.0125653	-0.000271675	-0.0300817	-0.0710836	0.0132862	0.0128893	0.0183048	0.00655722	0
190.4	-0.0528933	-0.0251496	0.0364392	0.0607586	-0.0335313	-0.0257286	0.0487792	0.0199283	0.0560625	0.000445168	0
190.6	-0.00908511	-0.0800272	-0.0097077	0.039693	-0.0338297	-0.0275482	0.0426297	-0.0240859	0.0326212	-0.0178673	0
190.8	0.0004177	-0.0693066	-0.0221077	0.00696641	0.000178979	-0.0560456	-0.00772153	-0.0228118	-0.019812	-0.0297615	0
191	0.000940861	0.0305041	-0.00926867	0.00977518	-0.0398087	-0.00636753	0.0132448	-0.0189123	0.0748965	0.00444034	0
191.2	0.0347022	0.0279184	0.0168504	-0.0339936	-0.0456284	0.00738212	0.0482866	0.0211302	0.0245183	0.0197889	0
191.4	0.00201841	0.00288541	0.0157394	0.0283559	-0.014997	0.00290057	0.0511289	0.0299124	-0.00310962	-0.00792647	0
191.6	-0.0238207	0.0169337	-0.032475	-0.0401491	0.00913833	-0.0154667	0.00626163	0.0197633	-0.0228008	-0.0088967	0
191.8	-0.0254573	0.0334971	-0.0366595	-0.0610265	0.00496261	-0.00764379	-0.00999593	-0.0109284	-0.0150844	0.0177536	0
192	-0.0286253	-0.00830438	-0.000508601	0.070367	-0.0195254	0.0192768	0.00610684	-0.0378891	0.0448095	0.0333181	0
192.2	-0.00970874	-0.0596058	-0.0237553	0.0458717	-0.0252758	0.00605492	-0.0121823	-0.00240174	0.0478245	0.0238974	0
192.4	-0.00861409	-0.0023544	-0.0311979	-0.00722687	0.0121764	-0.0115779	-0.00881225	0.0327536	-0.0168998	-0.0223047	0
192.6	-0.0233731	-0.0081775	-0.0125176	-0.0270557	0.00394274	-0.0443754	-0.0350216	-0.0106187	-0.0649145	-0.00639556	0
192.8	-0.0381174	-0.020336	-0.0327533	-0.0305266	-0.0162878	-0.0356612	-0.0258924	-0.0423595	-0.0556207	0.0291848	0
193	-0.0523118	-0.00437798	-0.0497004	-0.029532	-0.0283598	-0.0187921	0.0154077	-0.023087	0.00827776	-0.00250659	0
193.2	-0.0131798	0.0160475	0.00752486	-0.020995	0.00165284	0.00118025	0.0288883	0.0267968	0.0237186	-0.0396428	0
193.4	0.0427031	0.00864166	0.0411486	-0.0190519	0.052119	0.0327019	0.0436763	0.0335977	-0.00868616	-0.0233086	0
193.6	-0.00151814	-0.0349447	-0.0439123	-0.0284878	0.0183049	0.0372601	0.0682945	-0.0276174	0.0322253	-0.0234084	0
193.8	-0.0183868	-0.0356526	-0.0221385	-0.00445025	-0.0527411	0.0507859	-0.0346351	0.00539357	0.0235599	-0.00856416	0
194	0.0132378	-0.0109175	0.0164917	0.00596247	-0.0441308	-0.00949686	0.0425872	-0.0132769	0.0196851	0.00887827	0
194.2	0.00245775	0.00307872	0.00244395	0.0247844	-0.0107421	-0.00865075	-0.00916905	-0.018729	0.0121576	0.0220897	0
194.4	-0.00402925	0.0163467	-0.02143	0.0233288	-0.00808578	-0.0106166	-0.0543991	-0.00179086	0.00463829	0.0111205	0
194.6	0.0256289	-0.00697996	-0.00452682	0.0168647	-0.00993866	-0.00944987	-0.00845046	-0.00840051	-0.0299839	-0.0184331	0
194.8	0.0174191	-0.0510746	0.0149246	0.0283595	0.0154725	0.0481213	-0.0469185	-0.0124107	-0.0736928	-0.0144835	0
195	-0.0144762	0.00799976	-0.0090976	-0.0102887	0.0372597	-0.0101883	0.0186633	0.0104361	-0.00653175	0.0270513	0
195.2	0.00824802	0.0329219	0.0299327	0.000640484	0.0126325	0.0193919	-0.00635829	0.048581	0.0405996	0.00721681	0
195.4	0.00224969	-0.00253933	0.0357999	-0.00210145	0.0496447	-0.00149629	0.00296687	0.0252917	-0.00548229	0.00906599	0
195.6	0.029271	-0.0134906	0.016971	-0.00346238	0.0358514	-0.0208987	-0.00494198	-0.0287917	-0.00539622	-0.0026484	0
195.8	0.03245	0.0242216	0.0125472	0.0162281	-0.000864741	-0.0102151	-0.00594277	-0.0139482	0.0280912	-0.0368003	0
196	-0.0284405	0.0573356	0.0105188	0.00728087	0.00315724	-0.0186243	-0.00333338	0.0249399	0.0202346	-0.0309105	0
196.2	-0.0372266	0.0382732	0.0120783	-0.0227169	-0.0219017	-0.0160369	-0.0612508	-0.0288766	0.0129002	-0.000281056	0
196.4	-0.0230701	-0.0266889	0.0173162	0.00913419	-0.00839375	-0.000105657	0.00925601	-0.0640079	-0.0113778	-0.0135322	0
196.6	0.00563712	-0.042873	-0.0501872	-0.0281641	-0.0152473	-0.0149859	0.0216846	0.00800206	0.0073925	-0.00215966	0
196.8	0.0126471	-0.0179863	0.00315079	-0.0214846	-0.0323983	-0.00329158	-0.0134112	0.0401265	0.0195142	0.00921286	0
197	-0.0185139	-0.0250947	0.0409686	0.0232558	-0.0109477	0.00416266	0.00412962	-0.00650428	0.00479575	0.00431399	0
197.2	-0.0343813	-0.0236688	-0.0123075	0.0168375	0.024178	0.00772736	0.0667633	0.0111939	-0.00597689	0.00161638	0
197.4	0.00322818	0.0106881	-0.0268302	-0.00945468	0.00616266	0.0309464	0.0780779	0.0692172	-0.0174652	0.00248628	0
197.6	0.0374882	-0.00766193	-0.0115634	0.00832286	-0.0383262	0.0212148	0.00285406	-0.000661722	-0.0387722	-0.00107164	0
197.8	0.0278007	0.000389764	0.00799871	-0.00723516	-0.0102093	0.0099177	-0.0622034	-0.000482565	-0.00843249	0.0139147	0
198	0.0237698	-0.0141197	-0.0324185	-0.0192638	0.00395163	0.00307541	-0.0391674	-0.0377327	-0.0452445	0.0183813	0
198.2	0.000906697	0.00627804	-0.018121	0.045037	-0.0130085	-0.0251269	0.019203	-0.0288692	-0.00206714	-0.00840944	0
198.4	-0.00226228	0.0219327	0.0212324	0.0313159	0.0081934	-0.0235094	0.00774032	0.0532662	0.0550142	-0.0102798	0
198.6	0.0259306	0.0156363	0.0126001	-0.040805	0.034535	0.00653218	-0.02819	0.0636537	0.0206731	0.00275343	0
198.8	0.0139773	0.048248	-0.00190389	-0.0109982	0.00601372	0.000373686	-0.000540853	-0.0103348	0.00823973	-0.0220987	0
199	-0.0230455	0.0493937	-0.00432176	-0.019424	0.00596397	-0.0101642	0.00701543	0.00633307	0.0362069	-0.0173264	0
199.2	-0.001173	-0.018872	0.00813395	0.0139941	-0.0104781	-0.0218175	0.00962468	-0.0212995	-0.0160864	0.0160387	0
199.4	0.00786035	-0.00991885	-0.0298634	-0.023015	-0.0316249	-0.020122	-0.0334425	-0.0604927	-0.00251202	0.0387655	0
199.6	-0.0260199	-0.0240476	0.0082715	-0.0396945	-0.0143193	-0.00700973	-0.0452241	-0.0558982	-0.0127659	-0.00817765	0
199.8	-0.0263439	-0.0418151	0.0403002	0.0206744	-0.00225267	0.0276601	-0.00043062	-0.0240104	-0.0337374	-0.0269078	0
200	0.00669424	-0.0217176	-0.0346627	0.0405654	-0.0269013	0.0155493	0.0239175	-0.017847	0.00731494	0.00721212	0
200.2	-0.0114929	-0.0504635	-0.0357	-0.0137734	-0.023413	-0.0641079	-0.000431494	-0.0511441	0.0123308	-0.0198146	0
200.4	-0.0193904	-0.00575046	0.0558493	-0.0146646	0.0111698	-0.00580422	-0.0168155	-0.0542302	-0.00931002	-0.00261857	0
200.6	-0.00189623	-0.0366965	0.0448414	-0.0505338	0.00710507	-0.0171268	-0.00220844	0.0242042	-0.04187	-0.00735777	0
200.8	-0.00167917	-0.0234972	-0.0120028	-0.0625032	0.0258261	-0.0257427	-0.0119454	0.0518997	-0.0415563	0.00963937	0
201	-0.0100907	0.0362371	-0.00829951	0.008952	0.0145305	-0.00120294	-0.00148808	0.0374037	0.0219088	0.0198311	0
201.2	-0.0142441	0.0129108	-0.00434997	0.0410044	-0.0135621	-0.00609223	0.014175	0.00974779	0.0501713	-0.00491825	0
201.4	-0.0156764	-0.0324974	-0.0557871	-0.0204058	0.0200168	-0.00581595	-0.0182978	-0.0273839	-0.0131717	-0.000147537	0
201.6	0.00265499	0.0389692	-0.0523284	-0.011408	0.0321123	0.0450281	-0.0241005	-0.00376417	-0.0371894	0.0388672	0
201.8	0.0223639	0.0207835	0.00964113	0.00905968	-0.0143406	0.0150783	-0.00565733	0.0142895	-0.0177029	-0.00389811	0
202	0.0418604	0.0528627	0.0241902	-0.0133427	0.00757394	0.0219248	-0.0351815	0.0240616	0.00700933	0.00236909	0
202.2	-0.0091833	-0.00713509	0.0214247	0.00200774	0.00440698	0.00781427	-0.0329675	-0.0114005	0.0137271	0.015683	0
202.4	-0.0191447	-0.030585	0.00698044	0.0246001	0.00739082	-0.0112713	-0.0100461	-0.0221496	-0.00601398	0.00826066	0
202.6	0.015467	0.0229504	0.00369315	0.00274391	0.0165057	0.00623881	-0.00246351	0.002254	-0.0114638	0.00929099	0
202.8	-0.021946	-0.0315523	0.0227199	0.00490853	-0.0344534	-0.0101516	-0.00409291	-0.00644701	0.00750476	0.00506755	0
203	0.00843408	0.00854705	-0.0340773	0.045698	0.00388293	-0.0509629	-0.0536771	0.0205578	-0.0247434	-0.00365763	0
203.2	-0.000713832	0.0466398	-0.0122255	0.0192955	-0.0168048	-0.0225692	0.0147821	0.0121495	-0.00836156	0.00103945	0
203.4	-0.0196464	-0.00303806	-0.0271465	0.0171251	-0.00391875	0.0213255	0.0614011	0.0105939	0.0467106	-0.01538	0
203.6	0.0163183	-0.00488968	-0.0222212	0.0453813	0.0128053	0.0112677	0.0366801	0.021286	0.0305522	-0.00365442	0
203.8	0.0435009	0.0351633	0.00726823	0.0248107	0.0142369	-0.00653282	0.0395941	0.00674922	-0.0230812	0.0106268	0
204	0.00422383	0.00336756	-0.000518557	-0.0438874	0.0245411	0.00100276	0.0437457	-0.019704	-0.00385832	-0.0236959	0
204.2	-0.0218652	-0.0339938	0.00801957	-0.0553308	-0.000716107	-0.0233506	-0.0364075	-0.0116079	0.037022	-0.035786	0
204.4	0.0042979	-0.00170292	0.00460545	0.0206129	-0.0258335	-0.0371336	-0.0225158	0.00626198	-0.00424711	-0.0030967	0
204.6	0.00864582	0.00358032	0.00330515	-0.00142821	-0.0150284	0.0217746	0.0251177	-0.00227592	0.0159039	-0.0360953	0
204.8	-0.0410415	0.0335632	0.0212055	0.0263142	-0.00862244	0.0312519	-0.0138296	-0.0106514	-0.0140025	-0.0271054	0
205	-0.0264964	0.0181781	0.0228426	0.027998	-0.0156618	0.00723778	-0.0210599	0.00973394	-0.0185724	0.022856	0
205.2	0.0086131	-0.03229	-0.000156182	-0.0567497	-0.012727	-0.0105972	0.000158541	0.0123737	0.0222794	0.048543	0
205.4	-0.0226848	-0.0184526	-0.00191265	-0.0525618	-0.00725302	-0.0170468	-0.0374662	-0.0223522	0.00218106	0.0366413	0
205.6	0.0154085	-0.00824068	0.0218709	0.0346654	-0.0115595	0.0384223	-0.00447007	-0.012727	0.00394872	-0.0147578	0
205.8	0.0073633	0.012381	0.0129939	-0.0169419	0.0148648	0.0175293	-0.00587784	0.00571038	-0.00714969	-0.00934132	0
206	-0.00333999	-0.0308518	-0.00468035	-0.0387858	-0.000645796	0.0163417	0.0372603	-0.0293916	-0.0388724	-0.00493077	0
206.2	-0.0210747	-0.0152199	-0.0108944	0.00517978	-0.00498401	-0.00100814	0.0433935	-0.013097	0.00149425	0.0123429	0
206.4	-0.00901678	-0.00447519	-0.0188269	0.0220893	0.0178275	-0.0228968	-4.82357e-05	0.0124261	-0.00377031	0.00341233	0
206.6	0.0208395	-0.0292181	-0.0393196	-0.0296646	0.0284996	-0.00536116	-0.0202904	0.000715699	-0.0500528	-0.0115317	0
206.8	0.00635891	0.0242495	-0.0481039	-0.049398	0.0236745	-0.000375725	-0.0199016	0.0124274	0.0152422	0.0224157	0
207	0.0260321	0.0133393	-0.00897023	0.0600707	-0.00333393	-0.0193136	-0.00442036	-0.027869	-0.0141232	-0.0263032	0
207.2	0.0192511	0.034617	0.0458434	0.00728359	-0.0215891	-0.0109419	0.0359625	-0.0200726	-0.0391628	-0.0357215	0
207.4	0.00289318	0.0304588	0.020456	-0.00346066	0.00494056	-0.0120934	0.0129701	-0.0192824	-0.0108434	-0.0359614	0
207.6	0.0173254	-0.0166527	-0.0106737	0.0287049	0.00924006	-0.0324718	-0.0255297	-0.00816473	0.00334667	-0.0226654	0
207.8	0.0213292	-0.0645807	0.00442165	-0.00196738	-0.00786505	-0.00471928	-0.0501848	0.00316531	-0.0289772	0.00988549	0
208	-0.0187549	-0.0512449	0.00478441	-0.0391619	-0.00150726	0.0245597	-0.0507326	-0.00963658	-0.0402613	0.0131552	0
208.2	-0.0381883	0.00879805	-0.0110794	-0.0145706	-0.000653151	-0.0394799	0.0127279	0.000525494	0.0115964	-0.00306681	0
208.4	-0.0105796	-0.0507581	0.015738	0.0228017	0.0118588	0.00411866	0.0051454	-0.0132028	0.0344269	0.0379298	0
208.6	0.00996203	-0.00713641	-0.0122279	-0.0131014	-0.0144569	0.0313858	-0.00724205	0.00330446	0.0208746	0.0265697	0
208.8	0.00346705	0.0427445	-0.0330011	-0.0232685	0.0150041	0.00296251	0.00034951	0.0106147	0.0246461	-0.00283097	0
209	0.0090603	0.0156826	-0.036171	0.0093522	-0.00497516	0.0155572	0.0219004	0.0040831	-0.00389291	0.00150489	0
209.2	-0.0211068	-0.0202814	-0.0289953	-0.00680348	-0.0413754	0.0182004	0.0184874	0.0123683	-0.00339082	0.0125501	0
209.4	-0.0896461	-0.0278483	0.00448627	-0.0391759	0.033449	-0.0281001	-0.00895883	0.0235064	0.0617535	0.0142321	0
209.6	-0.0331277	-0.0217437	0.00644565	0.0209247	0.0126511	0.0440063	-0.00158432	0.0150371	-0.0109633	0.0264668	0
209.8	0.00971736	0.0272751	0.00351492	0.00589241	-0.0248669	0.0267366	-0.0632055	-0.00805587	-0.0286552	-0.00616005	0
210	-0.00764638	0.0340832	0.0134205	0.0321166	-0.00203237	-0.00778347	-0.00014886	-0.0120796	0.00485906	0.0255742	0
210.2	-0.00488545	-0.00764749	0.0125795	-0.00411298	6.40564e-05	0.00562294	0.0028268	-0.00762452	0.0528473	0.0256065	0
210.4	0.0160505	-0.00490856	-0.0192102	-0.0220924	0.00346479	0.00564571	-0.0196952	0.0192276	0.0291439	-0.00973596	0
210.6	0.0140554	0.0103914	-0.0245104	0.0152462	0.0142801	-0.0213632	0.0392013	0.0338148	-0.041572	-0.0072757	0
210.8	0.022192	-0.0203976	0.01619	-0.0344216	-0.0251654	-0.00638366	0.0252686	-0.0155819	-0.0144901	-0.0222636	0
211	0.0456976	0.0674544	-0.0117417	0.0439923	0.0179293	0.0129824	0.0189244	-0.0273372	0.0391522	-0.0510935	0
211.2	0.0429927	0.0708906	0.048151	0.0595287	0.0129627	-0.0205453	-0.00244981	-0.0308597	0.023581	-0.00585633	0
211.4	0.0557313	0.0437908	0.0454644	0.0472453	0.0167867	-0.0255478	0.0346329	0.0257675	-0.0527656	-0.00575454	0
211.6	0.033685	-0.014509	0.0399855	-0.0164285	-0.00899434	0.00169596	0.0321666	0.00801846	-0.0460024	-0.022683	0
211.8	0.0147325	-0.0232191	0.0366011	-0.0392601	-0.0386002	0.0399743	0.021427	-0.0232657	0.0319919	-0.00893485	0
212	0.0384871	0.0401169	-0.0140863	0.0207825	0.0030337	0.0548332	0.0679605	0.028464	0.0357902	-0.0102277	0
212.2	0.00373984	-0.00819282	0.0362688	-0.0201171	0.0324692	0.0054634	0.0299465	-0.00697258	-0.00636759	-0.00902916	0
212.4	0.00803589	0.00201081	0.0637558	0.0136241	0.0408751	0.0297466	0.0225844	0.0314767	0.0246	0.0347082	0
212.6	0.00575066	0.0430263	-0.013722	0.0109742	0.0251986	0.0631988	-0.000472465	0.0293692	0.0175687	0.0243223	0
212.8	-0.0151525	-0.000905164	-0.0209304	0.018819	0.000110772	0.00992719	-0.025358	0.0176885	0.0100056	-0.0118414	0
213	0.00653497	-0.00341429	0.02112	0.000697008	-0.00570322	-0.0216674	-0.0214917	0.0340635	0.0230389	0.0113291	0
213.2	0.014764	0.03438	0.00533663	-0.0316929	-0.00929267	0.00178514	-0.0172783	0.0151982	0.0329765	0.0465281	0
213.4	-0.0458408	-0.039294	-0.0129823	0.0111436	-0.00958708	-0.018506	-0.0245281	-0.0306987	0.0366266	0.0148507	0
213.6	-0.0293548	-0.0601312	0.00152967	0.0246321	0.0435713	-0.0200801	0.000859244	-0.00266933	0.00396865	0.00104574	0
213.8	-0.0280819	-0.0108694	-0.0121484	0.0450914	0.00799096	-0.0294143	0.00120994	-0.0254079	-0.0395401	0.0126841	0
214	-0.0280599	-0.00114858	-0.0380634	0.00274039	-0.0256987	-0.0306327	-0.0186269	-0.0456325	-0.0174943	-0.00361811	0
214.2	-0.0330105	-0.0135579	-0.0383688	-0.0391371	-0.0323747	-0.0307263	-0.0416957	0.0026638	-0.00273495	-0.00134605	0
214.4	-0.00234818	-0.000557906	-0.023956	-0.0380732	-0.0305062	-0.0167091	-0.0238897	0.00429174	-0.0703454	0.0168362	0
214.6	0.0257082	0.0123107	-0.0294671	-0.0207458	-0.0227606	-0.00724505	-0.00469274	-0.0487237	-0.0932276	-0.00404474	0
214.8	-0.0359496	-0.0157167	-0.0512315	-0.0047379	-0.0168284	-0.0375246	-0.0542798	-0.0103057	-0.000985918	-0.0278223	0
215	-0.0222448	-0.0536913	-0.0440835	-0.0343241	0.000179798	-0.0252824	-0.0322043	-0.0102857	-0.050991	0.0033656	0
215.2	-0.00191277	0.00117823	0.0147368	-0.0201202	-0.0211286	-0.0239094	0.0200772	0.0140032	-0.00571202	-0.00454555	0
215.4	0.00525837	0.0127407	0.0507263	-0.0310858	0.00177258	0.0249835	0.00914033	0.00791557	0.0306204	-0.0115791	0
215.6	0.0337304	-0.0232272	0.0432511	-0.0238598	0.00943314	0.0565956	0.0158215	0.00572401	0.0528026	-0.0119013	0
215.8	0.0374585	-0.00761089	0.0281519	0.0460892	-0.0043262	0.0514063	0.0601017	0.0353572	0.0609203	-0.0182898	0
216	0.000567502	0.0429449	0.0352386	0.0753209	0.0398973	0.0432349	0.0608773	0.039844	0.0327611	-0.00492585	0
216.2	0.0227517	0.0344067	0.0599669	0.023023	0.0527616	-0.0252611	0.0431953	0.0214863	0.0630233	0.0227942	0
216.4	0.0351706	-0.0248162	0.0511154	0.0411943	-0.0179941	-0.028008	0.01796	0.0238512	-0.00707005	0.0252464	0
216.6	0.0155423	-0.021649	0.0490409	0.00835551	0.0160633	0.0110045	0.038492	0.0398767	0.0201879	-0.00307217	0
216.8	0.000436704	0.0357183	0.0073047	0.0115653	0.0167011	0.0220174	-0.00802396	0.0144626	0.0132967	-0.022585	0
217	-0.00400374	0.0464242	-0.0448984	0.0146344	-0.00837633	0.00587163	-0.025492	-0.00581629	-0.0174429	-0.00954164	0
217.2	-0.0089917	0.0195343	-0.0254299	-0.000696094	0.0168771	0.00735505	0.0146512	0.000143578	-0.0261712	0.00136605	0
217.4	-0.00965981	0.00821432	0.00274436	0.0554492	0.0102455	0.0150333	-0.0264467	-0.03011	-0.0755642	-0.00863116	0
217.6	-0.0120072	-0.0424325	-0.064165	0.0327838	0.00374246	-0.0185224	-0.0166558	-0.0526684	-0.0155367	0.0136645	0
217.8	-0.0121695	0.0308907	-0.0190924	-0.0377533	0.000286086	-0.00654215	-0.0207585	-0.0244438	0.00516405	0.0232715	0
218	0.00391578	0.0577033	-0.0313245	-0.0151119	-0.018006	-0.00613148	-0.0262478	-0.013948	0.0453691	0.00817967	0
218.2	-0.0226405	-0.00951623	-0.0361014	-0.021575	-0.0215605	0.00945765	0.000200096	-0.00699846	0.018279	-0.00579982	0
218.4	-0.0241013	-0.0561801	-0.00431162	-0.0214981	0.00858415	0.0223006	0.0265966	-0.000472974	-0.0367891	-0.023837	0
218.6	0.0306282	-0.0171173	0.00608469	0.0253267	0.0211278	-0.00063074	0.0279779	0.0316475	-0.00888014	-0.029087	0
218.8	0.025129	0.0352151	0.0408363	-0.0456377	-0.0179696	0.00392627	0.0315452	0.0973381	0.0261816	4.55332e-05	0
219	0.0532325	-0.00563865	0.00292897	-0.0279436	-0.0195265	0.00926003	0.0220354	0.000641359	0.0788558	-0.0296642	0
219.2	0.0271268	0.0129684	0.0501713	0.0224031	0.00778609	0.0122286	0.0173541	-0.000132525	0.0888282	-0.0106905	0
219.4	0.00947932	0.0457701	0.0126506	-0.0106996	-0.018776	-0.00817492	0.010586	0.0191119	0.0172176	-0.00775032	0
219.6	0.00685887	-0.00713173	0.0220947	-0.0270894	-0.0199829	-0.00718621	0.00909493	0.00689322	-0.0382756	-0.00461537	0
219.8	-0.00357991	-0.0520452	0.0833959	-0.0343817	0.00221018	0.0342048	-0.000867583	-0.0252636	-0.00269251	0.0116508	0
220	0.00389587	-0.00950539	0.013511	-0.0619601	-0.034906	0.046735	-0.00823184	-0.0529307	0.0198272	-0.0116976	0
220.2	0.00510079	-0.0125833	0.00824799	0.0455997	-0.0236273	0.0104372	0.0359043	0.00667148	-0.0520187	-0.0110447	0
220.4	-0.0257151	0.00852303	0.0103228	-0.0115428	0.0264996	0.0167755	0.0124616	-0.00860727	-0.0116586	0.0490483	0
220.6	-0.00176806	0.0276171	-0.0292797	0.0105508	0.0143323	-0.0236309	-0.0331519	-0.00796683	-0.0157029	0.0117724	0
220.8	-0.0315728	0.0116961	-0.0342735	0.0725715	0.00549517	-0.015674	-0.00219465	0.0386328	-0.009708	-0.0059283	0
221	-0.0341372	0.00183711	-0.00258608	0.0758794	0.0175712	-0.00458981	0.0175195	0.0402533	-0.0162556	-0.000476978	0
221.2	0.0222273	0.0285283	0.00489734	0.0283489	0.0111711	-0.0352425	-0.0329279	-0.00157154	-0.0447129	-0.0119986	0
221.4	-0.0170683	0.00707652	-0.0163748	-0.0196559	0.00613776	-0.00291979	-0.0338735	-0.0100839	-0.00791658	0.0246107	0
221.6	-0.010024	-0.0919187	-0.035943	0.0423944	0.00300339	-0.00449366	0.00287851	-0.0263389	-0.0505589	0.00836251	0
221.8	-0.00844793	0.0489499	0.00678561	-0.00249497	0.0118371	-0.0365854	-0.0467078	0.0219872	-0.0291834	0.0419416	0
222	-0.0334487	0.0755802	-0.032134	-0.0208325	-0.00217508	-0.0339865	-0.0253277	-0.00988454	-0.00769649	0.0465251	0
222.2	-0.0434901	-0.0244852	-0.0487297	-0.0168951	-0.0246881	-0.00453145	0.000640749	-0.0556855	0.0464222	0.0134972	0
222.4	-0.0158722	-0.0426695	-0.0241085	-0.0219932	0.00172326	0.002386	-0.0103686	-0.019816	0.0614536	0.00174858	0
222.6	0.0198552	-0.00749384	-0.0290367	-0.0125426	0.0375893	-0.00754283	-0.000141977	0.0122256	-0.0113262	-0.00858721	0
222.8	0.0123112	-0.00980741	0.0218571	-0.0382054	0.00315125	-0.00542448	-0.0310832	-0.0235448	-0.00965351	-0.0401318	0
223	-0.042495	0.00582271	0.00920189	-0.0367245	0.0135106	-0.0308163	-0.049776	-0.0276032	-0.0242532	-0.00137747	0
223.2	-0.0123787	-0.0175759	-0.025745	-0.0195445	-0.0173519	-0.00538085	-0.0132298	0.0193127	0.06279	-0.0255144	0
223.4	0.00941036	-0.0213578	-0.008908	0.0224601	-0.0320958	0.00378028	0.00935325	0.0199984	0.0447456	-0.00234993	0
223.6	0.000483117	0.0197007	-0.000632616	0.0224759	-0.00999312	-0.00703482	0.0414367	0.00545301	-0.0049934	0.00140563	0
223.8	0.0147936	0.035375	-0.0100419	-0.0137954	0.00148436	0.00697332	0.0600091	0.0218198	0.00674938	-0.0222784	0
224	0.0130704	-0.0103167	0.0144363	0.000467733	0.0119948	0.0117608	0.000182449	-0.00578551	-0.0214515	0.0203843	0
224.2	-0.022198	-0.0481346	0.0144794	0.0144811	0.0307639	-0.016703	-0.0214826	-0.0626999	0.00526833	-0.023318	0
224.4	0.0307998	-0.0279382	0.0555775	-0.010358	-0.032867	-0.00177294	0.00518842	0.0333044	0.0255616	-0.00237793	0
224.6	-0.010071	0.00215872	0.0288961	0.00500474	-0.0216854	0.0267209	-0.0162191	-0.0203236	-0.00701567	0.000653995	0
224.8	0.00595093	-0.00462775	-0.0227551	-0.0127907	0.0143273	0.0162399	-0.000310178	-0.0512503	-0.0117732	-0.0145257	0
225	0.0592664	0.013417	0.0179615	-0.0236268	0.0129206	0.0147954	0.0221811	0.0423836	0.000646793	-0.0183221	0
225.2	0.00392137	0.0354075	0.0493988	0.0255212	0.0145483	0.0315158	-0.0172398	0.0581157	-0.0111601	-0.0111935	0
225.4	-0.028649	-0.0183631	-0.0308872	0.0321862	0.0128033	0.010299	-0.0275892	-0.00747994	-0.00316303	0.0286144	0
225.6	0.0210657	0.000480205	0.0152159	0.0213005	-0.0129392	0.0219833	-0.0122437	0.0208988	-0.0023848	0.0680691	0
225.8	0.0153243	-0.0200575	-0.0476538	0.0049305	0.000334912	-0.0161352	0.000864189	-0.0277718	0.00299416	0.00552988	0
226	-0.0165776	-0.0167958	-0.0222294	0.00835145	-0.0268795	-0.0455745	0.00637737	0.0108248	-0.000295169	-0.00655016	0
226.2	-0.0157075	0.00148559	0.0115996	0.00124067	-0.00686869	-0.00329836	0.0156783	0.0417378	-0.0305352	0.0105473	0
226.4	-0.00809955	0.0212436	-0.0224455	-0.0277594	0.0204464	0.00442645	0.0248636	0.041902	-0.0264963	-0.00245586	0
226.6	-0.00729247	0.0288366	9.93891e-05	-0.0582474	-0.0121072	-0.0440541	0.02916	0.0548585	0.0251164	0.00441458	0
226.8	0.0165543	-0.0347873	0.0344708	-0.0684039	0.0457219	0.022056	0.0316375	-0.0548261	0.00968591	0.0168643	0
227	-0.00416721	-0.0146908	0.0436786	0.0158283	0.0121921	0.0541021	0.0102493	0.0135068	-0.0209477	-0.00420533	0
227.2	0.0105151	0.00153057	-0.0165963	0.0497426	-0.0216408	-0.00908238	0.031326	-0.0435054	0.032071	-0.000586799	0
227.4	0.0150729	-0.0216535	-0.0812815	-0.00716839	-0.0118467	0.003419	-0.0095815	-0.016014	0.0254631	-0.0265547	0
227.6	-0.0380165	-0.0518396	-0.0256995	0.0113102	-0.000705676	0.0109076	-0.0454542	0.0449604	-0.0360465	-0.0195402	0
227.8	-0.0737271	-0.049497	0.0232456	0.0555777	-0.00994714	-0.0204293	-0.0290141	-0.015706	-0.00306936	0.0247922	0
228	-0.0380533	-0.0212253	-0.0483672	-0.0129036	-0.0213114	0.0138986	-0.0436166	-0.03645	0.047095	0.00314159	0
228.2	-0.0216657	-0.0220426	0.0218525	0.0176936	-0.0159172	-0.048265	-0.0165636	-0.013606	-0.0637311	0.0113228	0
228.4	-0.0208449	-0.00459949	-0.0162739	-0.0315035	0.0196434	-0.0371832	-0.042228	0.0127124	-0.0145501	0.0514384	0
228.6	-0.00883617	-0.018428	-0.0278814	-0.0186782	0.0305222	-0.0299423	-0.0155604	-0.0141228	-0.00311846	-0.000458772	0
228.8	0.0040962	0.0325313	-0.00909101	0.0105471	0.0243065	-0.00122636	0.0269967	0.00354453	0.00518547	-0.0337355	0
229	0.0222562	0.0717701	0.0122309	-0.029507	-0.0204054	0.00090702	0.0409164	0.00248509	0.00140847	-0.0201862	0
229.2	0.0430892	0.0569465	0.0363387	-0.0263879	-0.0486943	-0.0222599	0.0442922	-0.061807	-0.0386341	-0.0382085	0
229.4	0.048767	0.116312	0.0199492	0.0494265	0.0140627	0.0449041	0.0201245	-0.0262975	0.0226055	-0.0475684	0
229.6	0.0751205	0.0445161	0.0533638	-0.0254186	-0.0322764	0.0175472	0.00620118	0.0186012	0.0184288	-0.0489442	0
229.8	0.0667891	0.0625964	0.050825	-0.0023457	-0.00670217	0.060101	0.0535579	0.0319531	0.0377976	-0.0452686	0
230	0.0332721	0.0596939	0.0161676	0.0417977	0.00453586	0.0471659	0.0809906	0.0182139	0.0355253	-0.0336067	0
230.2	0.00669682	0.00886864	0.0003637	0.0207684	-0.0315372	0.0409672	0.0281814	-0.0272008	0.00226845	0.00739105	0
230.4	0.00975907	-0.00124579	-0.00797774	-0.0105362	-0.0267475	0.0434087	-0.037028	-0.0256625	-0.0344655	0.0263238	0
230.6	0.0307923	-0.00974058	-0.0228602	0.000321095	0.00612885	-0.0170085	-0.0251076	0.0500619	-0.0591627	0.00608916	0
230.8	0.0201091	-0.0720865	-0.00031455	0.0363194	-0.00582194	0.0162452	0.0191137	0.0508783	-0.0175238	0.0358096	0
231	-0.0112072	-0.0652138	0.0177679	0.0312679	0.0260364	-0.0199341	-0.00604927	0.0147807	0.0624331	0.0153657	0
231.2	-0.00782796	-0.039426	-0.0060189	0.00387035	0.0307784	-0.0266027	-0.0108891	0.000215301	0.0233754	0.0426963	0
231.4	-0.0262359	-0.00320929	-0.00994656	-0.037807	0.0328756	-0.0131924	0.0168577	0.0190091	0.0239935	0.0398793	0
231.6	-0.0452475	-0.00152915	0.0176987	-0.0146062	0.0141437	-0.0143127	0.0248553	-0.000605014	0.0379526	6.8659e-07	0
231.8	-0.031959	-0.0220171	0.0038743	0.0274151	-0.011645	-0.00292911	-0.0100326	-0.0262278	-0.0311328	-0.00501939	0
232	-0.0376763	-0.0114629	-0.0319738	-0.0326756	0.0218024	0.000753879	-0.0511947	0.00537672	-0.0294657	0.00824984	0
232.2	-0.0399819	-0.0484303	0.0346113	-0.0422635	0.0229511	-0.0510391	-0.0401666	-0.0454739	0.062744	0.0226048	0
232.4	-0.00799069	0.0132512	0.0461819	-0.00561973	0.00988685	-0.0248355	-0.0090103	-0.0334938	-0.00519441	0.0171078	0
232.6	0.00493818	0.0401567	-0.0186781	0.00458238	-0.0123613	0.026622	0.0449851	0.00354661	0.0273125	-0.0196916	0
232.8	0.0136713	0.0139777	-0.0219106	0.00137994	-0.0279403	0.00413332	0.0555228	0.00654867	0.0207563	-0.0403261	0
233	0.0256367	0.000670538	-0.0191494	-0.000537178	-0.0122849	0.00509132	0.0231403	-0.0093664	-0.040394	-0.0176087	0
233.2	0.0212445	0.007757	-0.0438344	-0.000642214	-0.00599787	0.0575963	0.0167033	-0.0100048	-0.00296154	0.00110791	0
233.4	0.0110167	0.00948453	0.0248178	0.0180214	-0.038808	0.00801651	0.014961	0.00498397	-0.0259621	-0.0161781	0
233.6	-0.0214112	-0.0233653	-0.037889	0.00460302	0.00673201	0.0025765	-0.0362673	0.0103121	-0.050678	-0.00585812	0
233.8	-0.0325694	0.0238504	-0.0120015	-0.0186321	-0.0143052	-0.00909616	-0.0625528	0.0220857	0.0118396	0.00383863	0
234	-0.00504442	0.0205159	-0.00944181	0.0279138	-0.0508969	-0.0222017	-0.0419395	-0.00208473	0.0248133	0.0218444	0
234.2	-0.0259673	-0.00896874	-0.0145891	0.0380992	-0.021859	-0.0336464	-0.0173451	-0.00810326	-0.0358294	-0.00126814	0
234.4	-0.038587	-0.0203202	0.0168917	-0.0152282	0.0215739	-0.0164036	-0.0313643	0.0454913	-0.0331663	-0.0248803	0
234.6	0.0134739	-0.0369503	0.00671687	-0.0220522	0.0241768	0.0212807	-0.0557613	0.0698195	0.0184168	0.0153651	0
234.8	-0.0374863	0.0106123	0.00656816	-0.0225687	0.027775	-0.0151771	-0.0188841	0.0097932	-0.0225777	0.0119268	0
235	0.00605349	-0.0453343	-0.00743864	-0.00262831	0.00897911	-0.0138662	0.028602	-0.0269868	0.0440075	0.0223086	0
235.2	0.0299917	-0.000471315	0.0279338	-0.00136903	0.00357882	-0.032352	0.0200849	-0.0462968	0.00749948	0.000908061	0
235.4	0.00754301	0.0318635	0.00783175	-0.00226722	0.0108562	-0.0220577	-0.0321727	-0.013468	-0.0211334	-0.0272096	0
235.6	-0.0328665	-0.00422103	-0.0175962	0.00628332	0.0106788	-0.013964	-0.0275884	0.00330718	0.0214162	-0.021643	0
235.8	-0.0225147	-0.0392986	0.0104026	-0.0247531	0.0183867	-0.028767	0.0203618	-0.0155422	0.0284031	-0.00946638	0
236	0.0604147	-0.0568932	-0.0144638	-0.0401814	0.0249209	0.00354966	0.00637121	0.00850256	0.00656607	-0.0120584	0
236.2	0.0260251	0.0372607	-0.0180958	0.100503	-0.0278753	-0.00407259	0.0173346	-0.0335077	-0.0102591	0.0109036	0
236.4	0.0130429	0.0116123	0.00290379	0.023015	-0.00818402	0.0102813	0.0471344	-0.0560563	-0.0342252	0.00930708	0
236.6	0.0140103	0.00814512	0.0411378	0.00761481	0.00087252	-0.00254512	0.0116766	0.0105561	-0.0660697	0.00616305	0
236.8	-0.000906057	0.00828262	0.029432	0.0230157	-0.0226248	-0.0147	-0.0236432	0.0412598	-0.0273238	0.002598	0
237	-0.0103844	-0.0140546	0.0036311	0.00138178	-0.00340942	0.00214682	-0.0193944	-0.0164945	0.0287998	-0.0032193	0
237.2	-0.0174032	0.00341701	0.00481802	0.0150293	0.0286101	0.010543	-0.00933331	-0.0258723	0.0116557	0.00859236	0
237.4	-0.0409865	0.0132085	-0.0357578	-0.0398827	-0.0136985	0.0010092	0.0121377	0.0390039	-0.00341863	0.0306978	0
237.6	-0.0210095	0.0408121	-0.00480247	-0.0285746	-0.014769	-0.00601487	-0.0153386	-0.0229815	-0.0159797	0.0332979	0
237.8	0.0370581	-0.0376249	0.0340082	0.0206605	-0.00573632	0.0474567	-0.0170018	-0.0138427	0.00471423	0.00751269	0
238	-0.000564085	-0.0507127	0.00593963	-0.0118669	0.017242	0.0317685	-0.0239743	0.0184931	-0.014231	-0.0366082	0
238.2	-0.0211154	-0.0181267	-0.00711301	-0.0529046	0.00284257	-0.0160864	-0.0181784	-0.014225	0.0272358	-0.0614106	0
238.4	0.00619817	-0.0294455	-0.00388897	-0.0257819	-0.0202535	-0.0102183	-0.000162968	-0.0337416	0.0760869	-0.0306411	0
238.6	-0.0365996	-0.0167827	-0.0460202	-0.000280075	0.0128627	0.00390547	0.00610531	0.00137871	-0.00999563	0.0266546	0
238.8	-0.0179283	0.0136999	-0.0169947	0.000457268	-0.0123749	0.0168751	0.053371	-0.00931873	0.000676045	0.0274628	0
239	-0.0389376	0.0857096	-0.0134355	-0.0240478	-0.0277128	-0.00865804	-0.0159285	0.0165811	0.00266478	-0.0153553	0
239.2	0.0260298	0.0563946	-0.0408547	-0.00399662	0.0240788	-0.0270054	-0.0296379	0.0176753	-0.0138434	-0.0230172	0
239.4	0.0482335	0.00666712	-0.0260559	0.0114385	0.0294868	0.0197018	0.041552	0.0573666	-0.00802073	-0.0104255	0
239.6	0.0119966	0.0165849	0.0180206	0.023619	0.00275515	0.0265818	0.0674312	0.0513239	-0.011277	0.000935512	0
239.8	0.0232462	0.0139903	0.0443351	0.0385755	0.00734466	-0.0141181	-0.00083412	-0.0189051	-0.036363	0.0161152	0
240	0.0176074	-0.0027387	0.061201	0.00973539	-0.0127772	0.0374437	-0.0519625	0.0138142	-0.0420928	0.0192432	0
240.2	-0.00658652	0.0609664	0.0439507	0.0163673	-0.00113825	0.028737	0.013978	-0.0189152	-0.0550101	0.0130667	0
240.4	0.00432136	-0.00364492	0.00638263	-0.0516009	0.021635	-0.00241762	0.0173613	-0.0144782	0.0110106	0.0157654	0
240.6	0.0212708	0.00509481	-0.0170307	-0.00775904	-0.0117731	-0.0197134	0.00897033	0.0139545	0.0320992	-0.00539108	0
240.8	0.0440099	-0.000265054	-0.0143423	0.00674085	-0.0182715	-0.00910038	0.0365368	-0.0171382	0.0303714	-0.0342968	0
241	0.0308737	-0.0535513	0.00147167	-0.00500729	0.00938893	-0.00232935	0.0142912	-0.0309708	0.0273097	-0.0181938	0
241.2	-0.014773	-0.00942429	0.0118737	0.0767342	-0.010598	-0.00748057	-0.0381145	0.0172489	-0.0095347	0.0222143	0
241.4	0.0161015	0.00408832	-0.00661235	0.00769067	-0.0176668	0.0110367	0.00570827	-0.00690688	-0.000706953	0.0154709	0
241.6	0.00404921	-0.0175398	-0.0654918	-0.0241873	0.0113477	-0.0394163	-0.0317575	0.0177091	0.00251462	0.00967629	0
241.8	-0.00894692	-0.0153957	-0.047746	0.0296596	0.0293229	-0.0477472	-0.0236186	-0.0274038	0.0330515	0.00620428	0
242	-0.00801293	0.0212596	0.0316645	0.0397703	0.0132531	-0.00943561	0.00463786	-0.0429557	0.000579117	0.0258302	0
242.2	-0.000328854	-0.0140463	0.0562163	0.0164042	-0.0356259	0.00748704	0.0192429	0.00589558	-0.0485905	0.0278987	0
242.4	0.00220226	-0.0539289	0.00571198	-0.0137194	-0.0575562	0.0144498	0.0222328	0.0162903	0.00737163	0.00755986	0
242.6	-0.018956	0.0165446	-0.0243082	-0.0713762	-0.00900246	0.0126944	-0.00459536	-0.0168758	0.0529698	0.0153019	0
242.8	-0.0331979	-0.0212213	-0.00190864	-0.0428662	0.018641	-0.0613015	-0.0216083	-0.0195835	-0.0682492	0.00523612	0
243	0.0057337	-0.0288033	0.0174906	-0.0329066	0.0151949	0.00710623	-0.0466757	-0.0358218	0.0107607	-0.00535373	0
243.2	-0.0205451	-0.0307415	0.0159288	-0.0100876	0.0302624	0.033053	0.00707097	0.0527538	0.0197169	-0.00835598	0
243.4	-0.0270526	-0.0171688	0.0337366	0.0428271	0.00695291	-0.00342182	0.0331818	0.0447973	0.00769409	-0.0320337	0
243.6	0.00650682	0.0297033	0.000799688	0.0179806	-0.0413498	-0.00508705	-0.026836	-0.02714	0.0384309	-0.018472	0
243.8	0.00122237	0.0200666	-0.0712358	-0.0525543	-0.0314008	0.013756	-0.0299436	0.00335266	0.0285094	0.0359677	0
244	0.00900328	-0.0455106	-0.0237499	0.0042443	0.0105308	0.00727705	0.0554247	0.0014939	0.0253087	0.0146103	0
244.2	0.0301459	0.0466133	0.0175297	0.0394449	0.017828	0.00216652	0.0116551	0.0205721	-0.0338784	-0.00536637	0
244.4	-0.0340163	0.0066988	0.0367882	0.0415907	0.0135196	0.00598595	0.0122114	0.00830882	-0.0175315	0.0191967	0
244.6	-0.031357	0.0264512	-0.0020489	0.0250072	-0.00208969	-0.0138447	-0.00368189	-0.0446171	-0.0175733	0.00668521	0
244.8	0.0134396	0.0265386	-0.025604	-0.0294986	-0.000524536	0.0308834	-0.0125599	-0.000829069	-0.027411	-0.0121018	0
245	0.00935395	-0.0243083	-0.00932546	-0.0574055	0.0168956	0.0759555	0.0186204	0.061335	0.00549003	0.00823757	0
245.2	-0.00748502	0.0362535	-0.00780454	0.00790512	0.0139989	-0.00144114	0.0223691	0.00722968	0.0135216	0.0104121	0
245.4	-0.0116504	0.0286751	0.0247091	0.0511471	0.01238	-0.0236255	0.0241442	0.0180374	-0.0192453	-0.0205697	0
245.6	0.0359977	-0.00460075	0.0565066	-0.00178857	0.0293353	0.0388716	0.0184845	-0.00163095	0.0249757	-0.00481067	0
245.8	0.0334287	0.0381565	-0.0202384	0.0117528	0.0174974	0.037464	-0.0590702	0.00156318	0.0286721	0.00279638	0
246	-0.0186789	0.00711337	-0.0227725	0.0188912	-0.0297815	-0.000909554	-0.0237372	0.0282594	-0.0037465	-0.0173615	0
246.2	-0.0327592	-0.0352152	0.00163587	-0.00757139	-0.0302458	-0.0321014	0.047974	0.00617763	-0.0254933	-0.0210567	0
246.4	0.0122629	0.019689	-0.0340702	-0.00323401	0.00638475	-0.0368699	0.00890931	-0.0319325	-0.012804	-0.0195805	0
246.6	0.0320362	0.0391119	-0.005449	0.0093042	-0.00296619	-0.00802879	-0.00932106	-0.006416	0.0242928	-0.03748	0
246.8	-0.0262295	0.00598345	-0.00880907	0.0187952	0.0195943	-0.0397288	0.0220813	-0.0070378	-0.00367057	0.00727771	0
247	-0.0393374	-0.0379462	0.00985893	0.032955	0.0110741	-0.0421435	0.023511	-0.0281991	-0.00321972	0.024165	0

## Sheet: fly2
Time	gamma-L5	gamma-L4	gamma-L3	gamma-L2	alpha-L	gamma-R5	gamma-R4	gamma-R3	gamma-R2	alpha-R	stimulus			Time	gamma-5	gamma-4	gamma-3	gamma-2	alpha	stimulus
0											0			0	0.00116962	-0.0172699	0.00311363	-0.00734949	-0.00933621	0
0.2											0			0.2	-9.07125e-06	-0.0124743	-0.0129667	-0.00224114	0.00725265	0
0.4											0			0.4	0.00456051	0.00371923	0.00200496	-0.00925885	0.015709	0
0.6											0			0.6	0.00577809	-0.00418873	-0.00365749	-0.0200783	0.00314191	0
0.8											0			0.8	0.0051073	0.0039819	-0.00972047	0.00116504	-0.0095533	0
1											0			1	-0.0101709	-0.00146451	-0.00376675	-0.0144365	-0.0179982	0
1.2											0			1.2	-0.0128454	-0.00110324	0.00241964	-0.0109722	-0.00642825	0
1.4											0			1.4	-0.000353111	-0.00433792	0.00195735	0.00525958	-0.00473854	0
1.6											0			1.6	0.000496794	0.00696858	-0.00476623	0.000567894	-0.014392	0
1.8											0			1.8	0.00137525	0.00981613	0.0191599	0.0104426	0.00726546	0
2											0			2	0.0119948	-0.0200775	0.0122707	0.027586	0.0213331	0
2.2	-0.019438	-0.0540744	0.0279779	0.0097811	-0.014176	0.0456097	-0.0385846	0.0164158	-0.0431739	-0.0151937	0			2.2	0.00175432	-0.00479781	-0.00340242	-0.00238209	0.00899787	0
2.4	-0.00279928	-0.0417146	-0.0350928	-0.0321698	-0.00412694	0.0296066	0.00549409	0.0318706	0.00689232	0.0240307	0			2.4	-0.00414778	-0.015267	-0.03342	-0.011889	-0.00214928	0
2.6	-0.000942934	-0.0119162	-0.0630688	-0.034457	-0.00588932	-0.0115629	0.0606139	-0.00838071	0.0662104	0.0588352	0			2.6	0.0102366	-0.0203901	-0.0117565	-0.00695288	0.00150781	0
2.8	-0.0154012	0.00574755	0.0455135	0.00852915	-0.00427758	-0.0269647	0.0330039	-0.0326502	0.00265947	-0.0115924	0			2.8	-0.0047281	0.00323849	0.00548022	0.00995214	0.0100483	0
3	-0.0180197	0.0359975	-0.00457887	-0.00952385	0.01985	-0.0262175	-0.0253067	0.0231311	-0.0150171	0.00736743	0			3	-0.0121949	-0.00150803	0.00689228	0.0028167	0.00375293	0
3.2	-0.0377705	0.0402246	-0.0453122	0.0232541	0.0342791	-0.0362313	-0.0460974	-0.0415101	-0.0244761	0.00758057	0			3.2	0.00269726	0.00160219	0.000221057	0.00310204	-0.001702	0
3.4	-0.00972151	0.015522	-0.0270312	-0.00295008	0.0229394	-0.0525061	0.0162492	-0.0835204	-0.0172423	0.000191549	0			3.4	-0.0120233	-0.00335267	0.00702918	-0.0138942	-0.00563715	0
3.6	0.0280173	-0.0151537	0.00979735	-0.0701741	0.0130173	-0.0252837	0.0125668	-0.0071493	0.00331693	0.0148207	0			3.6	-0.00497982	-0.00105941	-0.0238359	-0.0239716	-0.0245559	0
3.8	0.0061169	0.000837453	0.0341296	-0.035727	0.0128109	0.0177854	-0.0802204	0.0214923	-0.0211414	0.0028144	0			3.8	0.00193994	0.0163516	-0.0301319	-0.0036786	-0.0134813	0
4	0.0116816	0.086173	-0.0184168	-0.00755692	0.00110623	-0.011383	-0.0311922	-0.0169964	-0.0449168	-0.00684789	0			4	0.00193658	-0.00623629	-0.00302656	0.0164925	0.00291985	0
4.2	0.0071602	0.0739053	0.000398369	-0.00635792	0.0106636	-0.00855922	-0.0310551	-0.00650635	0.00228672	-0.00804426	0			4.2	0.00410551	-0.00312539	0.00895995	0.00732829	0.00712748	0
4.4	-0.0181379	-0.0197624	-0.0180154	-0.00647034	0.00412987	-0.00211293	0.0100435	0.00280684	-0.0191374	0.0108367	0			4.4	-0.0142179	-0.00964779	0.010432	0.00271185	-0.00469802	0
4.6	-0.0206534	-0.0670183	0.00959256	-0.0198333	-0.0298495	-0.0155427	-0.0336769	-0.0133055	-0.0217094	-9.43754e-05	0			4.6	0.00785018	0.0121844	0.00690272	0.0122748	-0.00132592	0
4.8	0.00894157	-0.0373263	0.036012	-0.041337	-0.0175855	-0.0213576	-0.0749454	0.0141229	0.00653589	-0.0206532	0			4.8	0.0134816	0.0276758	-0.00799048	-0.00146906	0.00746963	0
5	0.0223318	0.0325194	-0.0120193	0.006146	0.0127918	-0.0105453	-0.0162266	0.0212161	0.00393883	-0.0225935	0			5	0.00307846	0.0340235	0.00502127	-0.00825103	0.00407717	0
5.2	-0.00723577	0.0443852	-0.04377	0.0810708	-0.0122309	0.00120788	0.0259272	-0.0389979	-0.00553375	-0.0189955	0			5.2	0.0199187	0.00846135	0.0258409	0.00707984	0.0120487	0
5.4	-0.0287099	-0.0871506	-0.0251165	-0.000750275	0.00252989	0.0112326	0.0405474	0.0195692	-0.00709627	0.00191536	0			5.4	0.0133711	0.0115732	0.000212025	-0.00241461	0.0231405	0
5.6	-0.00786392	-0.0496992	0.00224549	-0.00747472	0.00994955	-0.0207952	-0.00811702	-0.00856898	0.000244419	-0.0161294	0			5.6	0.00373415	0.0193799	-0.00525103	0.0021604	0.010329	0
5.8	0.00385623	0.0291247	-0.0208889	0.0251721	0.00370352	-0.0125169	0.0009698	-0.0413625	0.0178562	-0.00363754	0			5.8	0.000767079	-0.00346524	0.00487602	0.0075607	0.000494492	0
6	0.00657648	0.0145955	0.00418045	-0.0186279	-0.0117801	0.0135207	0.0288254	-0.026152	-0.00419997	-0.0130815	0			6	-0.013556	-0.0151365	-0.00228382	-0.00166105	-0.0063972	0
6.2	-0.00287839	-0.0206235	0.0260781	-0.0299973	-0.015363	0.0130435	0.0389536	-0.0142669	-0.00977487	-0.0167934	0			6.2	-0.0130955	-0.0180304	0.0145985	0.00942256	-0.00293658	0
6.4	0.00146308	-0.013907	-0.00221611	0.0315129	-0.00788478	0.00685124	0.0269618	-0.000308464	0.0173522	0.00836961	0			6.4	-0.00154777	-0.0291652	0.0151992	-0.000346484	-0.00987033	0
6.6	0.0429984	0.00280274	0.0315528	0.0165336	-0.00264572	0.0192022	-0.0315396	0.0373634	-0.00690175	-0.0116156	0			6.6	-0.0253044	-0.0310617	-0.00545537	-0.00291918	0.00236996	0
6.8	0.0109097	0.060703	0.0247153	0.0280842	0.0387979	0.0283862	-0.0398518	0.0118607	0.0154663	0.0229895	0			6.8	-0.0296368	-0.0351966	-0.0245426	-0.0144716	0.0216555	0
7	0.010597	0.038552	0.0218152	0.0212376	0.0187755	-0.0103433	-0.0336389	0.0456194	0.0165288	0.0239352	0			7	-0.0194581	-0.0204798	0.00281791	-0.0123406	-0.0114662	0
7.2	-0.0127033	-0.00573168	0.0396044	-0.033806	-0.0344204	0.0018855	0.00948594	0.0462206	0.00329712	-0.00697223	0			7.2	-0.0220444	-0.0044481	-0.0201485	0.000986605	-0.0194832	0
7.4	-0.0205316	-0.0246971	0.0193057	-0.000779778	-0.0292347	0.0110544	0.0417922	0.0244071	0.00140294	-0.00497522	0			7.4	-0.00830352	0.0135299	-0.0137536	0.00260439	0.00205087	0
7.6	-0.00585449	-0.0529195	-0.0329945	0.0220649	0.0186951	-0.00634165	0.0127448	0.0112487	0.00035559	0.0248814	0			7.6	-0.0166829	-0.00398706	0.0223776	0.00359827	-0.000626102	0
7.8	-0.027337	-0.0672725	-0.0491335	-0.0563774	0.026115	0.00553295	-0.0272084	-0.0125575	-0.00479974	0.0241287	0			7.8	-0.0212767	0.0067506	0.0168178	-0.0061777	0.00197248	0
8	-0.0324876	-0.000294089	-0.0366147	0.0128123	-0.00703973	2.48728e-05	-0.0182568	0.000644257	-0.00157234	-0.000251081	0			8	-0.00939471	0.0110149	0.0133284	-0.00599751	0.00187889	0
8.2	-0.0247784	0.0334454	-0.0351747	0.0184743	-0.0285938	0.0132884	-0.00765784	-0.00298672	-0.0122431	0.0132309	0			8.2	-0.0196735	-0.0216658	0.013402	0.00312412	0.00100677	0
8.4	0.000930461	-0.00102271	-0.00391363	-0.03805	0.00698414	-0.0133923	-0.0206464	-0.0430607	-0.00914583	0.0159117	0			8.4	-0.015049	-0.011586	-0.017506	0.023286	0.027744	0
8.6	-0.016903	0.00933004	0.0336037	0.00612943	0.0216275	-0.0162284	0.00781398	-0.0202345	0.0370695	-0.00971357	0			8.6	-0.00882659	-0.0263195	-0.012099	0.015429	0.000267292	0
8.8	-0.0225467	0.0144129	0.0408211	0.0135588	-0.00210502	0.0177091	0.0284545	-0.0094535	0.0178325	-0.0197297	0			8.8	-0.002702	-0.0207706	-0.00440423	0.00637113	0.00346898	0
9	0.0112766	0.0114779	0.00733983	-0.0441308	-0.0088875	0.00984175	0.0178547	-0.04355	-0.0451367	0.00810003	0			9	-0.00366103	0.0185791	0.00750946	-0.000126301	-0.0058889	0
9.2	0.0121171	0.0714301	-0.035263	0.0180878	0.000187344	-0.0260973	0.0230404	-0.0153007	-0.0177894	0.0121369	0			9.2	-0.0153826	0.0213912	0.017333	0.00895166	-0.00160505	0
9.4	0.0233375	0.024644	-0.0110758	0.0234784	-0.0122539	0.00652651	-0.0274994	-0.00125394	-0.0177762	-0.0451534	0			9.4	-0.0113677	0.0131186	-0.00370264	0.0108284	0.01731	0
9.6	0.0202769	3.23737e-05	0.0464414	-0.00446001	-0.00233352	-0.00937389	-0.0255336	0.0180522	-0.000290055	-0.00553485	0			9.6	-0.00915215	0.00696137	-0.0225908	-0.00769003	0.000915316	0
9.8	-0.000876014	-0.0117344	0.00477536	-0.005192	0.0184562	-0.0166094	-0.0299303	0.0167628	0.0291331	-0.00097507	0			9.8	-0.0124129	-0.0176724	-0.00902608	-0.000581213	-0.00370928	0
10	0.00602304	-0.065053	-0.0383831	0.0173833	0.0176108	0.000381483	0.0424646	-0.00987721	0.0107203	-0.0119658	0			10	0.00669853	0.00963352	0.00495832	0.0272308	0.0190573	1
10.2	0.00794915	-0.0556373	0.000599539	0.00332537	-0.00103756	0.00455166	0.0660363	-0.0326307	-0.0410714	-0.0128257	0			10.2	0.0394086	0.0472091	0.0289081	0.0219408	0.00695092	1
10.4	-0.00846643	0.00543598	0.0283573	-0.0284747	-0.0226132	3.71934e-05	-0.0326702	-0.0212238	-0.0336398	-0.0123394	0			10.4	0.0676219	0.0598372	0.0413727	0.0115564	-0.00259942	1
10.6	0.0157264	-0.0315055	-0.0231944	-0.00578328	-0.0223152	0.00465099	-0.00633909	0.0332083	0.0407111	0.039318	0			10.6	0.0603575	0.0546774	0.0368584	0.0134172	0.00310836	1
10.8	0.00377193	0.0293935	-0.0573378	-0.0141548	0.0439255	-0.00750039	0.0228321	0.0758182	0.0384431	0.0452212	0			10.8	0.0467137	0.0313647	0.0237573	0.0173317	-0.00185286	1
11	0.0396932	-0.00361307	0.0195703	-0.0175505	0.0198746	-0.0239586	0.0289192	-0.0242872	-0.0232331	0.0371581	0			11	0.0306769	0.000724258	0.0472221	-0.00347533	0.0064075	1
11.2	0.0295464	-0.00777723	0.0401855	-0.021066	0.00517912	-0.0188628	-0.0177641	-0.0724668	-0.0249378	0.0048311	0			11.2	0.0246845	0.0239779	0.0336633	0.00358543	0.00201787	1
11.4	0.01965	0.0613426	-0.00224631	0.0159465	0.0123574	0.00946849	0.00089792	-0.0181762	0.0104118	-0.0128525	0			11.4	0.0450305	0.0325726	0.0366928	0.0284214	-0.0091936	1
11.6	0.0348248	0.0750432	-0.00122842	0.0578513	-0.00603506	0.00776909	0.0301001	0.017143	0.028334	-0.0100678	0			11.6	0.0362852	0.0129051	0.0518429	0.0182761	0.0042497	1
11.8	0.0100981	0.0305523	0.0164736	0.0499246	-0.0143109	-0.0257732	-0.0216465	0.015453	0.0404053	-0.0186284	0			11.8	0.00926262	0.0125941	0.0318163	0.0156705	-0.00199492	1
12	0.00541312	0.0263288	-0.0111281	0.051166	0.000491586	-0.000937727	0.0317408	0.0468852	0.0297458	-0.00893447	0			12	0.0029942	0.0177563	0.0204552	0.0127939	-0.0112988	1
12.2	-0.0244341	-0.0433393	-0.00392466	-0.0359122	0.0228131	0.0140711	-0.00488564	0.0666056	-0.000580512	-0.0235968	0			12.2	0.00616921	0.00441127	0.0281802	0.00579267	-0.00231673	1
12.4	-0.0172813	-0.00329551	-0.00231232	-0.0128186	-0.0191978	-0.00929264	-0.00427016	0.00789609	-0.0309484	-0.0109713	0			12.4	0.0136243	0.0146764	0.0350251	-0.00834881	-0.0246666	1
12.6	0.0195514	-0.0268382	0.0103521	0.00108262	-0.0280915	-0.0104638	0.0194849	-0.0084216	-0.0255494	-0.0114557	0			12.6	-0.00382071	0.0272651	-0.000987594	-0.0153318	-0.0139694	1
12.8	-0.00396029	-0.0426594	0.0277837	-0.00525943	-0.00299487	0.0177408	0.00707054	0.0407418	-0.0189255	-0.0190625	0			12.8	-0.0109145	0.0361554	0.0232023	-0.00741621	-0.015621	1
13	-0.0431315	0.0295499	0.0136717	0.0122224	-0.00622001	0.0308476	-0.0112597	0.0194007	-0.00372381	-0.00479101	0			13	-0.0086679	0.0143167	0.0232885	0.00291045	-0.0329001	0
13.2	-0.00887495	0.0110247	-0.00286796	-0.0118606	9.56707e-05	0.0260373	-0.00120571	-0.0649341	0.0397942	-0.000817626	0			13.2	-0.00976798	-0.00153646	0.00415399	-0.0033772	-0.0218864	0
13.4	-0.031886	0.031088	0.0201724	0.0469601	0.00963289	0.0234936	0.0165011	-0.0268578	-0.0129805	0.000800149	0			13.4	0.00129076	0.0185395	0.017486	-0.00313529	-0.0190344	0
13.6	-0.00690044	-0.0399872	0.0071724	0.0330713	-0.0190696	0.0080264	-0.0132687	-0.0211077	-0.0243808	0.00526993	0			13.6	0.00410039	0.0328705	0.00932844	-0.0109946	-0.020927	0
13.8	0.0134672	0.0051748	-0.0128678	0.0155556	-0.000766093	-0.0024738	-0.00933469	0.00472877	-0.00845204	0.0304341	0			13.8	-0.0122707	0.0293368	0.0193434	-0.0145112	-0.0146591	0
14	0.0153468	0.0576762	0.0119306	-0.0101804	0.0238861	0.0295414	0.0291119	0.0266696	-0.0102582	0.050144	0			14	-0.00793879	0.0105867	0.0262785	0.0215528	-0.0170852	0
14.2	0.027988	-0.00340361	0.0601268	-0.0262948	0.00307155	0.0663458	0.0271818	0.0308313	0.0158739	0.0196017	0			14.2	-0.00839322	0.011893	0.0293321	0.0126439	-0.0149181	0
14.4	0.0202727	-0.0491396	0.0321007	-0.00986713	-0.0134581	0.040816	-0.0362792	0.0391344	0.0483606	-0.0150834	0			14.4	-0.00779562	0.0211658	0.0295361	0.0157968	-0.00837312	0
14.6	-0.0183224	-0.0179057	-0.0541019	-0.0429379	0.00688748	-0.0122685	-0.0687169	-0.00080787	-0.00169287	0.0123822	0			14.6	-0.00919486	0.0270615	0.0236235	0.0273856	-0.0131812	0
14.8	0.00828535	0.0212953	0.0297293	-0.0406042	0.0147796	-0.00571806	0.0198846	-0.0303395	-0.00083764	-0.010614	0			14.8	-0.00701203	0.0233708	0.0231255	0.0103902	-0.0271083	0
15	-0.00842583	0.0289236	-0.0214935	0.0211224	-0.0222344	0.0094179	-0.0200015	0.0189741	-0.0225047	0.0011186	0			15	0.0151471	0.00819677	0.0253629	0.00826589	-0.024564	0
15.2	-0.0216896	-0.00447671	-0.0410548	-0.00883774	-0.00649345	-0.0329255	-0.0304447	0.0145918	0.0011057	-0.00233579	0			15.2	0.0140387	0.0185258	0.0318407	0.0260437	-0.0171782	0
15.4	-0.00102443	-0.0394786	0.0131968	-0.0449492	-0.00593556	-0.0358245	-0.00801137	0.00208986	0.00934273	-0.0333832	0			15.4	-0.0245486	0.00352163	0.0432972	-0.00737235	-0.0242136	0
15.6	0.00506881	-0.0489099	0.00541891	0.0221023	-0.029174	0.0115838	0.00959955	0.0238708	-0.0152028	-0.0268491	0			15.6	-0.0155819	-0.000780712	0.00909113	-0.0226675	-0.0239979	0
15.8	-0.0102957	-0.0434296	-0.0333251	0.0508125	0.00935331	-0.00678871	0.0661262	-0.0123788	0.0139032	-0.000410011	0			15.8	-0.000333643	0.00880312	-0.0021249	-0.0205767	-0.0171573	0
16	-0.0133528	-0.0206641	-0.0413165	-0.0452734	0.00249692	-0.0351939	0.020778	-0.0593346	0.00906357	-0.0219092	0			16	-0.0135829	-0.000488593	0.00848812	0.0026798	-0.00525819	0
16.2	-0.0339814	0.0109693	-0.0563242	-0.0625859	0.0160351	-0.0131792	0.0192251	-0.0800504	-0.00813923	0.00516892	0			16.2	-0.01604	-0.028876	-0.000289594	0.0113538	-0.00368525	0
16.4	-0.016237	0.0241331	-0.00810591	-0.00305141	0.0297862	-0.0220527	-0.0480879	-0.0411216	-0.0136316	0.00258021	0			16.4	-0.00407394	0.00119952	-0.00130607	0.0154814	-0.0101473	0
16.6	0.0174304	-0.000242318	0.0137259	-0.0246732	0.0268338	-0.0145715	0.00866725	-0.0367589	-0.00417916	0.0191611	0			16.6	0.00466525	0.0120765	-0.0116816	0.0308527	-0.00314574	0
16.8	0.0240011	-0.00261554	0.00477691	-0.0159769	0.0331022	0.00412002	0.050833	-0.0183919	-0.0180603	0.0348718	0			16.8	0.000145051	0.00679002	0.0150635	0.0238773	0.0174393	0
17	0.0258697	0.0276001	-0.00149496	0.0582696	0.0208006	-0.00315463	-0.0324733	0.0456673	-0.0219513	-0.00325696	0			17	0.017031	0.00765342	0.00704232	0.00525278	0.00766576	0
17.2	0.0314774	0.0220238	-0.0248512	0.0038879	-0.0341552	0.0123646	0.0143107	0.0345875	0.0281855	-0.0133276	0			17.2	0.0208522	5.05005e-05	-0.0167756	0.0160075	-0.0125794	0
17.4	-0.00949349	0.0193435	0.0523341	0.00497396	-0.0192203	0.0180224	-0.0302158	0.0278072	0.0030457	0.0230174	0			17.4	0.00786742	0.00618215	-0.00156965	0.0185165	0.00319134	0
17.6	0.0219611	-0.0192836	0.0514264	0.0218206	-0.0231294	-0.0311694	-0.0495411	0.0445446	0.0177712	0.0213578	0			17.6	0.00755735	0.0187811	0.00908228	-0.0129638	-0.00555509	0
17.8	0.0210173	-0.0264637	-0.0021838	0.0246153	-0.0202075	-0.030541	0.0966674	0.0925454	0.00274136	-0.00546688	0			17.8	-0.00247263	-0.00860963	-0.00839695	-0.0126726	0.000718854	0
18	-0.00751303	0.0368919	-0.0149464	0.0115916	-0.0228378	-0.0192074	0.0788082	0.0433352	0.00449914	-0.00359332	0			18	-0.00240634	0.00779023	0.000715486	-0.00704013	0.00688723	0
18.2	-0.0173205	0.0248463	0.0127277	0.0207729	-0.042456	-0.0173578	-0.0398633	-0.0123791	0.0147325	-0.0159804	0			18.2	0.0114908	0.00384969	-0.0102982	0.00831376	-0.0037262	0
18.4	-0.0202	-0.0742308	0.0262909	0.0381195	-0.0288206	0.0151541	0.00726444	0.0478189	-0.0106211	-0.0496543	0			18.4	0.00789176	-0.011642	-0.0145253	-0.00656241	0.0016143	0
18.6	-0.00217715	-0.0349038	0.0131089	-0.0205835	0.016457	0.0148456	-0.0427264	0.0129623	0.014628	-0.00654029	0			18.6	0.00346903	0.00358213	0.00713905	-0.0058929	0.00572904	0
18.8	-0.00577938	-0.0125303	0.0117348	-0.0514228	0.0136715	0.00767113	-0.0199035	-0.0647226	-0.0289925	0.00453783	0			18.8	-0.00671095	-0.00646603	-0.0113959	5.87266e-05	0.0008688	0
19	0.00143862	0.0813531	0.0318521	0.0267858	0.0179069	0.0477136	0.0129264	-0.0365281	-0.00805341	0.000919959	0			19	-0.00996239	-0.0123634	-0.0130809	-0.0152247	0.00887544	0
19.2	0.0117862	0.000549058	-0.0325233	0.0134595	0.0281557	0.0399529	0.00879481	0.0214604	0.0150559	0.00989239	0			19.2	0.0144105	-0.00606688	-0.00697352	-0.0139204	0.0155288	0
19.4	0.00225444	-0.0591924	-0.0751045	-0.0607024	0.0142079	0.0230248	-0.000757053	0.0115976	0.0223756	-0.00163664	0			19.4	0.00702663	-0.0113507	0.00700044	-0.0109707	-0.00238131	0
19.6	-0.0154935	0.0206286	-0.000985117	-0.0337216	-0.000584717	0.0353417	-0.0151857	-0.0122481	0.0146233	-0.0266114	0			19.6	-0.0129261	-0.00585261	-0.0211085	-0.0150197	-0.0133628	0
19.8	-0.0204891	0.00132633	0.0363234	0.0217143	0.00558498	0.00637059	-0.0429443	0.00716467	-0.0166556	-0.0178461	0			19.8	-0.0137383	0.0115865	0.00394341	-0.0101549	0.00464661	0
20	-0.023528	0.0565258	-0.00935746	-0.00207476	-0.00362649	-0.00628296	-0.0241518	-0.00711557	0.0317925	-0.0013868	0			20	-0.000144443	0.00856909	0.00385435	-0.0128414	0.00415698	0
20.2	-0.0262521	0.0018003	0.0650917	0.0346371	0.0134084	0.0192814	0.0110635	-0.0224344	-0.0220794	0.020595	0
20.4	-0.0112229	-0.0630239	-0.0056397	-0.0102941	0.000333027	0.00943043	0.0243717	-0.0390649	-0.036285	0.0231282	0
20.6	-0.00740233	-0.0257929	-0.0362079	-0.0260223	-0.0358056	-0.0192585	0.031709	-0.0215597	-0.00933617	0.0110299	0
20.8	0.0005524	0.04737	0.0160233	0.0216096	-0.0384173	-0.0245133	0.0372606	0.0140719	0.00388848	0.00316538	0
21	0.0315618	0.0470898	-0.00911597	0.00716882	-0.0163176	-0.00915675	0.0150663	0.0169128	0.0174853	-0.0062694	0
21.2	0.0345424	-0.013528	0.00284393	-0.031535	-0.00608965	0.00656799	-0.0174895	0.00343065	0.0165465	-0.00965146	0
21.4	0.0114224	-0.0304999	0.0246516	-0.0180893	0.0322649	-0.00205082	-0.00758997	0.00546321	-0.0156739	0.0399516	0
21.6	0.0210137	0.0420412	-0.0296662	-0.00915213	0.0250007	-0.0220213	-0.0348199	-0.00531948	-0.0498776	0.0503312	0
21.8	0.0251402	0.00479241	-0.0457491	0.0454742	0.0446942	-0.0171233	-0.0129122	-0.0566698	0.00894154	0.0344895	0
22	0.0200709	0.0317703	-0.0160198	0.0379991	0.0373484	-0.00615591	0.0173316	-0.0283627	0.0321458	0.0298724	0
22.2	-0.00432366	0.107073	-0.00313235	-0.029679	0.00526987	-0.00911251	-0.0133889	0.0306108	-0.0178762	0.0143338	0
22.4	-0.028432	0.0101423	0.0144172	-0.0147338	0.00785912	-0.00912319	-0.0241812	-0.00217868	-0.0106431	-0.00860695	0
22.6	0.0196245	-0.0384056	0.0448381	0.0173118	-0.0282657	0.000989289	0.0326203	0.006797	0.0123024	0.0009768	0
22.8	0.00170272	-0.0415022	0.00979001	0.00833836	0.0187087	0.0142485	0.0234137	0.0145557	0.00860712	-0.0498748	0
23	-0.0115291	-0.0406133	0.0112812	-0.00151771	0.012212	0.00155988	0.0287719	0.040146	0.0460123	-0.0597981	0
23.2	-0.0150896	0.0153019	-0.0130446	0.0203704	-0.0137866	-0.008679	0.0209229	0.0289836	0.0252315	-0.0422769	0
23.4	0.00122272	0.00859855	0.00373257	0.00298376	-0.00660242	-0.0139794	0.0140447	0.0107179	-0.00909651	-0.0234499	0
23.6	0.014238	-0.073464	0.0311113	-0.0381334	-0.000324739	-0.020422	0.0222645	0.0157363	0.0129209	-0.00572205	0
23.8	-0.0151631	-0.0432675	-0.0664206	0.00337607	-0.00733185	-0.01489	-0.000382357	-0.0072936	0.015193	-0.00988956	0
24	0.0105498	0.0135313	-0.0379546	0.0364465	-0.0153333	-0.0107133	0.00444557	-0.0217114	0.0171165	-0.00882475	0
24.2	0.0290647	0.011305	0.0501022	-0.0123704	-0.0431235	0.0319166	0.00737152	-0.0152371	-0.0115091	0.00142574	0
24.4	0.0268215	0.0365883	0.0503497	-0.0251215	-0.00890242	0.0334898	0.00368135	-0.000318942	-0.0502261	-0.00901867	0
24.6	0.00657488	-0.00780408	-0.0122571	0.0199849	-0.00636333	0.000466234	0.0246514	-0.0126081	-0.020606	-0.0324233	0
24.8	-0.00543999	-0.0390235	-0.0354358	0.0246759	-0.0271907	-0.00967884	0.00442434	-0.0195464	0.00574938	-0.00295648	0
25	-0.00220187	0.0315932	-0.00977585	-0.0202112	0.023488	0.00913302	-0.0540645	0.0124782	-0.0211013	0.0551675	0
25.2	-0.0203887	0.0212572	-0.00521757	-0.0126092	0.0616992	0.0323755	-0.03229	0.0331894	0.00400816	0.0442798	0
25.4	-0.0313196	0.0451625	-0.0184386	0.019339	0.0335295	0.041214	-0.0542833	0.0341245	-0.0146268	0.0487466	0
25.6	-0.0160246	-0.0062953	0.0239966	0.00543697	-0.0275596	0.00275806	-0.0291691	-0.000828115	-0.00809455	0.00393878	0
25.8	-0.0247284	-0.0346303	0.0426374	-0.0188339	-0.0262376	-0.0176837	0.0262546	-0.0220359	0.0277101	-0.022597	0
26	-0.0271367	-0.0179406	0.0335371	0.0143964	0.00814434	-0.00913406	-0.00886908	0.0132491	0.0185579	0.0203691	0
26.2	-0.00863038	-0.0100641	0.00758398	0.0410286	0.00310578	-0.00624599	-0.064037	0.0284641	-0.0154426	0.0361015	0
26.4	-0.00943598	-0.0138425	-0.0483552	-0.00867594	-0.0315068	-0.0064705	-0.0166731	-0.0151394	-0.00756405	-0.0197707	0
26.6	-0.00240122	-0.0215176	-0.0358453	-0.0214621	-0.0405422	0.00367287	0.00805474	-0.00633326	-0.0109734	-0.0112376	0
26.8	0.0084748	0.0403882	0.0529086	0.01137	0.022321	0.00609522	0.0323161	-0.0463938	-0.0304974	0.0166734	0
27	0.0136976	0.0114917	0.0353763	0.0433447	0.0336339	-0.0416356	0.0124129	-0.059176	-0.0203637	-0.00302492	0
27.2	-0.00304082	-0.0265065	-0.0290757	0.0174882	-0.00726828	-0.0270959	-0.0181055	0.0189586	0.00670404	-0.0490001	0
27.4	0.00390595	-0.00295077	-0.0581883	-0.0276288	-0.0149523	0.00374912	-0.00881079	-0.00254311	0.0157951	-0.0291176	0
27.6	0.0400382	0.019344	-0.0499868	-0.0353304	0.0110734	-0.0241963	0.0296975	-0.0928128	0.00910256	0.0186079	0
27.8	0.0254235	0.00318797	-0.00581343	-0.0220083	0.0168738	-0.0112534	0.0253988	-0.00953527	0.0133298	-0.0111056	0
28	-0.0239223	-0.0408427	0.00635192	-0.00484996	0.0227784	0.0215367	-0.0653579	-0.0105185	0.030721	-0.00958984	0
28.2	-0.0335768	-0.0179998	-0.00783594	-0.0252733	-0.0125504	-0.0108466	-0.0500954	-0.00121502	0.0343256	-0.0209278	0
28.4	-0.013974	-0.0083236	0.0241512	-0.0291866	-0.0146291	-0.0554649	0.0397185	0.00263385	0.0188027	0.00140628	0
28.6	-0.00653879	-0.00282326	0.0155193	-0.0180766	0.0141784	-0.051709	0.0222561	0.0311067	0.00377197	0.0268081	0
28.8	-0.0148697	0.0272803	-0.0490378	-0.00911935	0.00907732	-0.0257315	0.0102671	0.0710819	-0.00998634	0.0117536	0
29	-0.0059262	0.0273636	-0.0205948	-0.0081002	-0.0166879	-0.00288786	0.0809435	0.0198653	-0.0167229	-0.0103699	0
29.2	0.0146833	-0.0101832	0.0799604	-0.0262799	-0.00518582	0.031207	-0.0187529	-0.0725795	-0.00783686	-0.00552517	0
29.4	-0.0150605	-0.000501435	0.00894508	-0.0108706	-0.0061387	0.0162247	-0.0714375	-0.00174781	-0.0406706	0.0103449	0
29.6	0.0185386	0.00837085	0.0437763	-0.0318066	-0.0171459	0.0192834	0.0113151	0.00765152	-0.0100793	-0.000474476	0
29.8	0.0184176	0.0610612	0.00403183	0.034366	-0.000238716	0.0265629	0.0419798	-0.0171933	-0.0071532	-0.00984344	0
30	0.0149721	0.0206123	-0.0143306	0.0983231	0.0284147	0.0347525	-0.0078694	-0.00287619	-0.0233208	-0.00126995	0
30.2	0.036949	-0.0546055	0.040372	0.0661754	0.0167948	0.0247454	-0.0526563	0.0386346	-0.0133136	-0.00333952	0
30.4	-0.00101082	0.0093309	-0.0421388	0.0294967	-0.0153286	-0.0195296	-0.0497266	0.0750887	-0.005952	-0.0127045	0
30.6	-0.0185736	-0.0222781	-0.0534251	-0.0192283	0.000394391	-0.0112747	0.030501	0.0484529	0.0325787	0.0135596	0
30.8	0.00956595	0.0120138	0.0175681	0.00584825	-0.0185245	0.0206714	0.00897317	-0.00302165	0.0144332	0.00939444	0
31	0.00707606	-0.0451563	0.00936305	0.0178351	-0.0111419	0.0101351	0.0512502	-0.0102681	0.00580732	0.0126697	0
31.2	0.00836023	-0.0186702	0.0131181	-0.0135204	0.0132622	-0.0083387	0.0925597	0.00529478	0.0201189	-0.00618557	0
31.4	0.0133307	0.0732857	0.0448633	-0.0427635	0.0295796	-0.00534903	0.0374575	0.00351837	0.0233695	-0.0247198	0
31.6	-0.0128676	0.0397929	0.0481198	-0.0365366	0.0250189	0.00284365	-0.0290093	0.0175039	0.0143745	-0.00327297	0
31.8	-0.0245531	-0.0226229	0.0554159	-0.00935746	-0.0131089	0.00792665	-0.0311903	0.0277666	0.0055264	0.0137406	0
32	-0.00416581	-0.0482995	-0.0259738	-0.00283191	-0.0224019	0.00173023	-0.0060902	-0.0810983	-0.00906331	0.0283568	0
32.2	0.00182098	-0.0166236	-0.0481167	0.0063175	-0.0341731	0.00801183	0.0297917	0.00337924	-0.00660318	0.0199501	0
32.4	0.000113319	0.0180541	0.00573159	0.0127819	-0.0179955	0.0354485	0.0172696	0.0248588	-0.00325495	-0.00510783	0
32.6	0.0146261	0.0372758	-0.0153515	0.0233514	0.00753761	0.0139941	-0.0441019	0.000834519	-0.017459	-0.0137877	0
32.8	0.0191334	0.027194	-0.0649706	-0.0109292	0.0166714	-0.000391002	-0.0580631	0.010831	-0.0191041	0.00136009	0
33	-0.0137569	-0.0254498	-0.0117152	-0.0370229	0.0247679	0.0397358	-0.0149631	-0.0295665	-0.00411087	0.0183752	0
33.2	-0.0405033	-0.0642203	0.00668971	0.0722873	0.0206513	-0.00141617	-0.0131043	-0.0315837	-0.0144835	0.00943501	0
33.4	-0.0295803	-0.0395026	-0.0528318	0.0156542	-0.0174362	-0.0129629	0.0387876	-0.030122	0.012928	-0.0475928	0
33.6	-0.0203166	-0.0242993	-0.00220868	-0.0120563	-0.014798	-0.0423371	-0.0523677	-0.0333783	-0.0157981	-0.0201335	0
33.8	-0.0315517	-0.00919202	0.0306495	-0.0327662	0.00907845	-0.0489378	-0.0805166	-0.0315713	0.00348074	-0.00302143	0
34	-0.0136478	-0.0256688	-0.0167238	-0.0183231	0.0111252	0.000416277	0.0130943	-0.0256913	0.0330033	-0.013355	0
34.2	0.0270694	-0.0356432	-0.0451997	0.0403232	-9.39915e-05	0.0213833	0.0491288	-0.0274935	-0.00230166	-0.00400357	0
34.4	0.0193485	0.0251705	-0.0279637	0.015924	0.0096071	-0.0187419	0.0242604	-0.0213874	-0.0170939	-0.0122893	0
34.6	-0.00299825	0.0217963	-0.000917368	-0.0244521	0.0295413	-0.000159492	0.0358266	0.0154649	-0.00780697	-0.00669993	0
34.8	0.0152325	0.0474393	0.0117924	-0.0431819	-0.0273386	-0.0107437	-0.0445066	-0.00822232	0.00921251	0.0364263	0
35	0.0136546	0.0303182	0.00461881	-0.00231155	-0.0133916	-0.0186558	-0.0283347	-0.00648429	0.00961001	0.040071	0
35.2	0.00192075	0.0122877	0.014172	0.000338332	0.0322405	0.0146787	-0.00196364	0.0330785	-0.0194533	-0.00732049	0
35.4	0.00455797	0.044425	0.0489337	-0.00649748	0.0139699	0.00962002	0.0191318	0.0398505	-0.0128793	-0.00910889	0
35.6	0.00184146	0.0361152	0.0456214	0.00821857	-0.0229656	-0.0361898	0.0712514	-0.0217872	0.0216533	0.0303091	0
35.8	-0.0111267	-0.0371419	-0.0153251	-0.0640589	-0.0210672	-0.00587979	0.0167292	-0.0713819	-0.0156822	0.000439754	0
36	-0.00793593	0.00262499	-0.0194367	-0.0703505	-0.0216384	0.00988552	0.00359553	0.0195643	-0.0233913	-0.00695372	0
36.2	0.0304041	-0.0306092	-0.0267303	0.0209736	0.00788169	0.0235936	-0.0121832	0.0199018	-0.0116935	-0.00894053	0
36.4	0.0315232	-0.0882582	0.014635	0.0507021	0.0125097	0.0323004	-0.0610764	-0.0105259	0.00736287	-0.00463119	0
36.6	-0.00198754	-0.0656796	0.0287817	0.0168795	-0.0205881	0.00920892	-0.0354409	0.00322379	0.024752	-0.0076174	0
36.8	0.00321051	0.00256692	0.0104403	0.0251808	-0.0285136	-0.0203588	0.0257551	0.0354235	0.0277287	0.000369657	0
37	0.0234996	0.0260385	0.0332332	0.0663283	0.0105386	-0.0108723	-0.00908137	0.0502936	0.0248758	0.0218999	0
37.2	-0.0217097	0.016374	0.00246656	0.0396231	0.0434219	0.00572242	-0.0250232	0.0254339	0.0187227	-0.012948	0
37.4	-0.00291965	0.0661887	-0.00733674	-0.0455364	0.058768	-0.0161659	0.0488942	0.0208023	-0.0294707	-0.0263491	0
37.6	0.00540372	0.00814706	-0.0162365	0.00933333	0.00500594	-0.0147582	0.0330862	0.0357296	0.0346124	0.00298121	0
37.8	-0.0183776	0.0339085	0.0267537	0.0226493	-0.0409911	-0.0344274	0.0144613	0.0333918	0.0241668	0.0167836	0
38	-0.0395161	0.0200276	0.00945908	-0.017012	-0.0362982	-0.0379115	0.042186	-0.000219423	-0.0406558	-0.00114534	0
38.2	-0.0312335	-0.0487915	-0.0568323	0.00936033	-0.030199	0.00377928	0.0244356	-0.00516475	-0.0282398	-0.00643545	0
38.4	0.0028965	0.0644661	0.00482495	0.0237931	-0.0341772	0.00469474	-0.0275228	0.0291426	-0.0210916	0.00364465	0
38.6	0.0143909	-0.0378296	0.00793763	0.0270951	-0.00447245	-0.00800186	-0.0222432	-0.0231382	0.00710301	-0.0195721	0
38.8	0.00753199	-0.0284518	-0.0057083	0.0182881	0.00432908	0.00547602	-0.0117386	-0.0195965	0.000883411	-0.00462813	0
39	-0.00148973	-0.0518016	0.0131782	0.00353165	-0.00641362	0.0141718	0.00872944	0.0306941	-0.00460141	0.00402639	0
39.2	0.0018406	-0.0258255	-0.0107699	-0.000621475	0.00966531	0.01649	0.0198235	0.0394211	0.00968298	0.00727106	0
39.4	0.00548312	0.0756624	-0.0394466	-0.0124602	0.0146994	0.0271804	0.0166989	0.00687709	0.00475007	0.0221033	0
39.6	-0.000663765	0.0617154	0.00730348	-0.0458721	-0.00525379	0.0407115	0.0193198	-0.0130323	-0.0134757	0.0277091	0
39.8	0.000569365	-0.0193421	0.0446328	-0.0373807	0.0246049	0.0446003	0.00943188	-0.0180507	0.0216321	0.0162614	0
40	-0.00369042	-0.0079262	0.0557215	0.037446	0.0192452	0.0282342	-0.0189567	-0.0239574	0.0619029	-0.00439231	0
40.2	-0.0191144	0.0107136	0.0555012	-0.0340977	0.0103746	0.0097725	-0.00231583	-0.0410657	-0.000144655	-0.0213429	0
40.4	0.00704354	0.0407398	0.0246818	-0.0151602	-0.034145	0.0221167	0.0032446	-0.00845873	-0.0328939	-0.0351244	0
40.6	0.0416325	0.0394883	-0.0303264	-0.0161364	-0.0239153	0.022023	-0.0258701	0.0314745	-0.00164608	-0.00851892	0
40.8	0.0388603	-0.00884912	-0.0447743	-0.0777119	0.0209969	-0.00655064	-0.0249889	-0.0113691	0.0196703	0.0210169	0
41	0.0127689	-0.0274226	-0.0348026	0.0102299	-0.0133352	-0.0103343	0.00786857	-0.0628421	0.0120292	-0.00528546	0
41.2	-0.0204332	-0.0248109	-0.0939018	0.021805	-0.00180431	-0.00850503	-0.00430971	0.00202093	-0.0131796	-0.0103027	0
41.4	0.00477586	-0.0479001	-0.0384714	-0.00735652	0.0154487	-0.0577095	0.0268505	-0.024217	-0.00712482	-0.0179163	0
41.6	-0.0111778	-0.00257755	0.00168339	-0.0272908	0.00576556	-0.0360441	0.00866561	-0.00566437	-0.00169482	-0.0105352	0
41.8	0.00283471	0.00442935	0.00573018	0.00582453	0.0286284	-0.000853976	-0.0352636	0.00037119	-0.0105636	-0.000845586	0
42	-0.00596116	0.000174055	0.00681523	0.040743	0.02603	-0.0154143	-0.0287773	-0.00897862	-0.00693557	0.0150537	0
42.2	-0.0589765	0.0385423	0.0261509	0.0184952	-0.00592086	-0.012069	-0.0122264	0.00845285	0.0115388	0.0332501	0
42.4	-0.00402673	0.00373944	0.0486099	-0.00265601	0.0190104	0.0182767	-0.0246731	-0.0121899	0.0147693	0.0193076	0
42.6	0.0302269	-0.0157721	-0.0304538	0.0134481	-0.0385132	-0.0339177	0.0223626	0.00795812	0.00677304	0.00529216	0
42.8	0.0251253	0.033017	0.0313552	-0.0371456	0.0189655	-0.0330009	-0.0218561	-0.0167596	-0.00990554	0.0194784	0
43	0.0211562	0.0217568	0.0342893	-0.00387991	0.0294028	0.0177264	0.016925	-0.00882911	-0.0122595	-0.00162113	0
43.2	-0.0164238	-0.0416232	-0.0309339	0.0176742	-0.0125466	0.0244834	0.00906286	0.035973	-0.0252407	-0.0232296	0
43.4	-0.0338944	-0.0622082	-0.0585837	-0.0224641	-0.0177946	-0.0174154	-0.0473988	0.0209042	-0.0217249	-0.00994303	0
43.6	0.00683398	-0.00696333	-0.0470811	-0.0105273	-0.014698	-0.0210625	0.0110393	-0.0151132	0.0100374	-0.00792165	0
43.8	-0.0121588	0.0639936	0.0234855	-0.00511866	-0.00839468	0.0263587	0.0336772	0.0292696	-0.00374467	-0.0250531	0
44	-0.00425185	0.0042531	0.0653382	-0.0264219	0.0171568	0.0147215	0.057206	-0.0301092	0.0171465	-0.0121773	0
44.2	-0.00269205	-0.034908	-0.000516048	-0.000598871	-0.0114798	0.0187048	0.00445625	-0.00212793	-0.00371028	-0.0146808	0
44.4	-0.00743975	-0.0174484	-0.0263591	0.0342722	0.00616149	0.0279036	-0.0233863	-0.00503086	-0.00721241	0.01569	0
44.6	0.0174816	0.0447088	0.0120218	0.0622895	6.57959e-05	0.0174329	-0.00850926	-0.0038901	2.20772e-05	0.0219813	0
44.8	0.0190077	0.0509174	0.0038126	0.0722926	-0.0403099	0.0123219	0.0107932	0.052212	-0.00543794	-0.0195852	0
45	-0.030813	-0.0299036	-0.0446714	0.0342735	0.0146064	0.0167342	0.0374274	0.0266839	-0.000256595	-0.0118603	0
45.2	-0.00391168	0.0229981	-0.0312487	-0.00771507	0.0307343	0.00816184	0.0131535	-0.00672756	-0.0316755	0.00435265	0
45.4	-0.00208437	0.00636294	0.0244627	-0.0518026	0.0212801	0.0294263	0.0053789	0.00280866	0.00582741	-0.0288183	0
45.6	0.00216656	-0.0349761	0.0884225	0.0476378	-0.00328752	-0.0137062	-0.0753934	0.0201603	0.0102627	-0.00104481	0
45.8	0.0204646	-0.0254986	0.084351	0.0842825	-0.0332167	0.0153544	-0.0219623	-0.00137123	0.000847061	0.0211373	0
46	0.0172473	0.00709574	0.0442511	-0.0148797	-0.00223879	0.0450673	0.049268	0.000354319	-0.00553012	-0.00229056	0
46.2	-0.00328061	0.0241667	0.0313881	-0.0505416	0.0410166	-0.0214256	-0.0192077	-0.00698785	-0.0285347	-0.000556607	0
46.4	-0.00822388	0.0333905	0.0110522	0.00210311	-0.0188944	-0.00939179	0.0202444	-0.0957632	-0.0111186	0.0203686	0
46.6	-0.0172411	0.0262621	-0.00254482	0.00480267	-0.0129436	-0.0312346	0.0267919	-0.00931772	0.0299027	0.00671622	0
46.8	-0.00610803	-0.0131248	-0.0245398	0.0267059	0.0143811	-0.0274319	0.0145385	-0.00300422	0.00291623	-0.00912402	0
47	0.0113725	-0.00974428	-0.0474972	9.0899e-05	0.0176961	-0.0171622	-0.0232481	-0.0408991	0.0164891	0.0128068	0
47.2	0.0201406	-0.00477445	-0.0147165	-0.0563206	0.00995595	-0.0339463	-0.061866	-0.044617	-0.0132612	0.024798	0
47.4	0.0189509	-0.0386819	-0.0112346	-0.0454517	0.00416371	-0.037309	-0.0661913	-0.00176274	-0.046603	0.0201061	0
47.6	0.0021282	-0.0359585	-0.07091	0.00576166	-0.00111406	-0.00716227	-0.047734	0.0264637	0.0271297	0.0168152	0
47.8	-0.0255049	0.0235393	-0.0137974	-0.00296345	0.00577774	-0.011334	-0.0306159	-0.0523617	0.00287803	-0.0168194	0
48	-0.0216962	0.0140445	-0.018498	-0.0123883	0.0205543	-0.0404855	-0.0142185	-0.0224858	-0.0244878	0.02574	0
48.2	0.00237683	-0.0553016	-0.00349829	-0.070665	-0.0127779	-0.0460696	0.00573506	0.0568736	0.0260696	-0.000207588	0
48.4	0.0122567	-0.0615091	-0.00883027	-0.0518325	-0.0188458	-0.0109389	0.0356338	0.0293519	0.0167524	-0.0485462	0
48.6	-0.00159105	-0.0449014	-0.0316079	-0.00114532	-0.00533849	0.00587017	0.062856	0.0194394	-0.0110099	-0.0418952	0
48.8	-0.00475764	-0.0168947	0.0237219	-0.00520564	-0.0281791	-0.00469735	0.0704191	0.0809184	-0.00127504	-0.0130799	0
49	0.0173799	0.0643968	0.0899529	0.0349931	-0.0335367	0.0137019	0.0524048	0.0505101	-0.0161631	0.00667147	0
49.2	0.0140875	0.00842058	-0.000636636	0.0855107	0.00662329	0.0157623	0.00265154	0.0193043	0.0526082	0.0256996	0
49.4	0.0107156	-0.0256251	-0.00547151	-0.00276225	-0.0159728	-0.0236417	-0.0491723	-0.00555795	0.0382734	-0.00775225	0
49.6	-0.0164776	0.0509815	-0.00287376	-0.0108941	0.0146171	-0.0368062	-0.0115295	0.0320081	0.0122278	-0.0396457	0
49.8	0.002843	0.0620821	0.0202838	0.0185988	0.00985564	-0.0157795	0.00499775	0.0210988	0.015766	-0.0342753	0
50	0.0291222	0.011384	0.00956731	0.018652	-0.0349473	-0.00560123	-0.0296977	-0.0533727	0.0184395	0.00810646	0
50.2	-0.00776382	0.0183678	-0.0491632	0.0191882	-0.00396626	0.00380814	0.00326688	-0.0492313	0.0115659	0.0312488	0
50.4	-0.0265818	-0.00864433	-0.00289135	-0.0358475	0.0368282	0.0426628	0.0746285	0.0122067	-0.0184839	-0.013167	0
50.6	-0.0442634	-0.0587777	-0.0361563	-0.0509314	0.0367002	0.0389628	0.0440488	-0.0317166	-0.0771857	-0.00528504	0
50.8	-0.010373	-0.0558557	-0.00668372	0.00123448	0.00615387	0.0421869	0.00900217	0.00410115	-0.00939351	0.000152912	0
51	-0.00525384	0.032942	0.0278029	0.00200082	-0.0252226	0.0211484	0.00950096	0.00721985	0.0290364	-0.00392095	0
51.2	-0.0169718	0.0448484	0.0197853	0.0330983	-0.0334297	-0.00125936	0.0254083	0.00768712	0.000187691	-0.00330377	0
51.4	-0.00418529	0.0114347	-0.00236155	0.0692547	-0.0237701	0.00431915	0.0271948	0.0313849	-0.00614251	0.00522727	0
51.6	-0.00499169	0.0689215	-0.0069719	0.00869175	-0.0182185	0.0211164	0.00552167	-0.00686765	-0.00716919	0.0112819	0
51.8	-0.00896194	0.0307144	0.0338727	0.0419716	-0.000339266	0.0504234	-0.00732091	0.00397134	-0.0135702	0.000643604	0
52	0.0327238	-0.012362	0.0193671	0.0366496	0.0621274	0.0274594	-0.00619203	0.0394403	0.0673373	0.0206287	0
52.2	0.0186207	0.0201833	0.00862703	-0.0249043	0.0196113	0.00915238	-0.0417789	0.0644437	-0.0065852	0.0152084	0
52.4	0.000460634	0.00682426	-0.00275598	-0.0584647	-0.0246715	0.0259752	-0.045788	0.0180668	-0.0571446	0.012388	0
52.6	0.0118995	-0.0479443	-0.00533272	-0.0453884	-0.00410048	0.0241194	0.0210673	-0.0329841	0.00949461	0.0316736	0
52.8	0.00625175	-0.0493906	-0.00193466	-0.0224061	0.0143509	-0.0156323	0.0407394	-0.0230453	0.0293246	0.0337847	0
53	-0.00539954	-0.0259681	-0.0307047	-0.00420164	0.0191688	-0.0212532	-0.0482917	-0.00805664	-0.0108667	-0.000283141	0
53.2	0.00257041	-0.00302385	-0.0173643	-0.00858185	0.00862035	0.0269545	-0.0577834	0.011883	-0.00211785	-0.0362165	0
53.4	-0.0400929	0.00983518	0.0179677	-0.0382079	-0.0386451	0.0245396	-0.0227492	-0.0175013	-0.0196756	-0.00959864	0
53.6	-0.00875521	-0.00121554	-0.0110935	-0.0303841	-0.0327603	-0.0155201	-0.00784554	-0.0761421	-0.026795	0.00403632	0
53.8	0.00994953	-0.0338342	-0.041933	0.0097198	-0.0175963	-0.0262464	-0.0140614	-0.0327514	0.0256659	-0.00762919	0
54	0.00814161	-0.0254196	-0.041169	0.0254322	0.0180133	-0.00927897	0.0118454	0.0327901	0.0631373	-0.0138544	0
54.2	0.0378358	0.00278234	-0.0280589	0.00792178	0.0614684	-0.00538262	0.0276506	-0.0123264	0.0174086	-0.00458529	0
54.4	-0.0112728	-0.038313	0.0122984	-0.00112739	-0.0107282	-0.00963134	-0.0424351	-0.0318674	-0.0223413	0.0108501	0
54.6	0.0277695	0.0149593	-0.0436834	0.00424661	0.014662	-0.00769839	0.00358814	-0.00857278	0.00138315	-0.022662	0
54.8	0.0143238	0.0284568	-0.0384629	0.0180542	-0.0307285	0.00504109	0.0413884	0.00577924	-0.0319363	-0.00203006	0
55	-0.0282913	0.0290707	0.0426703	0.0151312	-0.0166999	0.0030253	0.0183712	0.0206502	-0.0283152	0.021358	0
55.2	-0.018206	0.0261396	0.049924	-0.020664	0.0283722	0.00545854	0.000729939	0.0286213	-0.00488408	0.015748	0
55.4	0.00584982	0.035187	-0.00655873	-0.0530816	0.0125927	0.00677915	0.0116541	-0.010369	-0.00683024	0.0119271	0
55.6	-0.00561544	0.0652561	-3.89914e-05	-0.0355185	0.00817914	-0.0196965	0.0135559	-0.0428943	0.00685813	0.00768105	0
55.8	0.000766478	0.00356465	0.00765196	0.00938001	-0.0136144	-0.0301229	0.000123001	0.0192021	-0.019385	-0.00304103	0
56	-0.00496056	0.0150745	0.02503	0.041442	-0.0154385	-0.061186	-0.0416263	-0.0318722	-0.0100554	-0.00210947	0
56.2	-0.012018	-0.0666853	0.0217753	0.0157151	0.0308586	-0.0662547	-0.0704101	-0.0458359	-0.0102815	-0.00772363	0
56.4	-0.00625462	-0.109781	0.0085354	-0.00761462	0.0278635	-0.0556247	-0.0428227	0.0245051	-0.00704597	-0.0147346	0
56.6	-0.0142875	-0.0581646	-0.00860656	-0.00986741	0.00544967	-0.0574254	-0.00271213	0.0174502	-0.0154069	0.00553569	0
56.8	-0.0237542	-0.0336288	-0.0226873	-0.0322378	0.0204073	-0.0485356	-0.0205947	-0.0460917	-0.0321171	0.02968	0
57	-0.0016139	-0.028184	-0.0201492	-0.0475451	-0.0145067	-0.0199558	-0.0488606	-0.0217275	-0.00350433	-0.000932957	0
57.2	-0.0140451	-0.027481	-0.0422167	-0.004505	-0.0601439	-0.026419	0.0120692	-0.0884819	-0.00504782	-0.0444132	0
57.4	0.0270072	0.0238718	-0.0274536	0.0134783	-0.0288842	-0.018728	0.00130198	-0.00713209	0.0262314	-0.0243965	0
57.6	0.00600849	0.0669026	-0.00396596	0.0109053	0.0124421	-0.038437	-0.017851	0.0125253	0.00792208	-0.000235322	0
57.8	-0.0136524	-0.0205143	0.0322043	0.00183723	0.00546328	-0.0293599	0.0124926	-0.0277776	-0.00588927	0.0129833	0
58	0.00668359	-0.0919576	0.0496901	-0.0269589	-0.0270706	-0.0268194	-0.0187646	-0.0106479	0.0142644	-0.00771558	0
58.2	-0.0127599	-0.0140627	-0.00396974	-0.0164831	-0.028446	-0.0653395	-0.0898011	-0.00308517	0.00287825	-0.0366549	0
58.4	-0.0168376	-0.0120771	-0.0532167	0.0744734	0.00921679	0.00459476	-0.0198754	-0.0299755	-0.013178	0.0257217	0
58.6	-0.00767199	-0.00828888	-0.0213861	0.0289671	-0.00302417	0.028721	-0.0560243	-0.0192042	-0.0527623	0.00416974	0
58.8	0.00665335	0.0133092	0.0011239	0.0219547	-0.00686178	0.0110363	-0.0515926	-0.00298044	-0.0328904	-0.0115967	0
59	0.0223213	0.0696551	-0.00310234	0.0305851	-0.0136146	0.0157192	-0.00258863	0.0137472	0.0142704	-0.0125916	0
59.2	0.0163931	0.0504463	-0.0158762	0.0109438	0.0091024	0.00686452	-0.000395369	0.0307446	-0.0100716	0.00479342	0
59.4	-5.75707e-05	-0.0176554	-0.0205065	-0.0128437	0.0442843	-0.00798041	-0.0130761	0.00498361	-0.0494693	0.019799	0
59.6	0.00594888	0.00896192	-0.00865471	-0.0189258	0.00290751	0.0188932	-0.00707265	-0.0354842	-0.0172059	-0.00582197	0
59.8	0.0100181	-0.0168521	-0.0131117	0.0405624	-0.0340673	-0.00207016	-0.0547892	0.0275792	-0.0382938	0.0113176	0
60	0.030531	-0.0319195	-0.0139605	0.039577	0.0105491	0.0262789	0.0170866	0.0381736	-0.0166472	0.0183192	1
60.2	0.0441233	0.0204759	0.0232223	0.0145285	0.0468533	0.0952267	0.0436566	0.0231361	-0.00968412	0.0219006	1
60.4	0.0918529	0.0961588	0.0763415	-0.012237	0.0234944	0.114522	0.00110679	0.00868194	0.000706332	0.0496033	1
60.6	0.121949	0.127047	0.0113202	-0.0430101	0.00611095	0.0799896	-0.0209983	0.0280534	-0.00399455	0.0486793	1
60.8	0.0773391	0.0614344	-0.0878799	-0.0533375	0.0348091	0.0316122	-0.0284147	0.0490882	-0.0392346	0.00415739	1
61	0.0453471	-0.0137147	0.0178803	-0.0313923	0.046549	-0.0259519	-0.0699423	-0.0115775	-0.0150435	0.00322509	1
61.2	0.0320247	0.117893	0.0408449	-0.00243669	0.0226272	-0.0217538	-0.100709	-0.0131775	0.0165989	0.0201405	1
61.4	0.0302066	0.0164002	-0.0259072	0.0168106	0.00262565	0.0292934	0.0008139	0.00075725	0.0138597	0.0229651	1
61.6	0.0310963	0.00856648	-0.0632665	0.0125915	0.019181	-0.0223969	-0.0222444	0.0137921	-0.00352609	0.0120482	1
61.8	0.0248382	0.0388649	-0.0170822	-0.0423909	0.030616	-0.0339564	-0.0546387	-0.00700764	0.0161667	-0.0167088	1
62	0.0293404	0.0022368	0.00646632	-0.060784	0.0161703	-0.00261009	-0.0182836	-0.0304298	0.0276733	-0.00985539	1
62.2	0.0402757	0.0640503	-0.0352373	0.00527524	0.000128512	-0.0551965	-0.0385209	-0.00617326	-0.0131344	0.0358957	1
62.4	0.0100633	0.0427733	-0.0015631	-0.0118911	-0.0146698	0.00158822	0.0325084	-0.0061342	-0.0102932	0.00801091	1
62.6	0.00701472	0.0305831	-0.021962	-0.0473015	0.00760233	0.00272279	0.0247396	-0.012498	-0.00549304	0.017783	1
62.8	0.0415935	0.0224649	0.00576172	0.0158382	-0.0282661	0.00730052	0.0515297	0.0156311	-0.0199116	-0.00566304	1
63	0.0288341	-0.0407108	0.0122779	0.0580879	-0.0452093	0.00657084	0.0592028	0.0200404	-0.00456244	-0.045357	0
63.2	-0.00086873	-0.0144326	-0.00776672	0.0254433	-0.0175214	-0.00115211	0.0184769	-0.00519072	-0.00471207	-0.050387	0
63.4	0.0100192	0.103746	-0.00215503	-0.0126663	-0.00740962	0.0133052	0.029534	0.00126812	-0.00803627	-0.0375629	0
63.6	0.0161488	0.0732165	-0.00355175	-0.0289103	-0.00964387	0.0210251	0.0759827	0.0240819	0.0429697	-0.0354748	0
63.8	0.0200576	-0.00797195	0.0150001	-0.0179456	-0.00930341	0.00444948	0.0304362	0.0034471	-0.00482865	-0.0287705	0
64	0.0301101	0.0122352	-0.012454	-0.0184714	-0.0202733	-0.000851994	0.0649815	0.049922	0.00496656	-0.0192849	0
64.2	-0.0174518	0.0246847	0.0418134	-0.0159134	-0.0311446	-7.61533e-05	0.0710547	0.047461	0.0270665	-0.0121461	0
64.4	-0.00246404	0.0449792	0.0465783	0.0156584	-0.0352521	-0.0201481	0.0409403	0.0495024	0.0505014	0.000462342	0
64.6	0.0305444	0.0882539	-0.0152791	0.0598726	-0.0396087	-0.0134785	0.0262571	0.0652382	0.0511716	-0.0254168	0
64.8	-0.00355298	0.0774839	0.00877218	0.0446345	-0.043025	0.0233074	0.0210683	0.030588	-0.016099	-0.0561622	0
65	0.0434945	0.0361079	0.0583385	-0.0205726	-0.0335314	-0.000446394	0.0556637	0.0130156	-0.0494213	0.0122191	0
65.2	0.0318681	0.0453645	0.0833642	0.0401875	-0.0234863	-0.00206498	0.11065	-0.034055	0.0430608	0.0108513	0
65.4	-0.0358364	0.0439698	0.0648147	-0.00554233	-0.0460071	0.000984168	0.0177798	-0.0200603	0.0188636	-0.0315104	0
65.6	-0.0464013	-0.0345776	-0.0112296	-0.0724461	-0.0296592	-0.00871361	-0.0305105	0.00369845	-0.00787515	-0.0214662	0
65.8	-0.0445417	-0.0341314	-0.0598999	-0.0287152	-0.0108184	0.0115706	-0.000303065	0.0273598	0.00447094	-0.0246911	0
66	-0.0653445	0.0136116	-0.0199762	0.0405162	-0.022225	0.0328314	-0.0274394	0.0663614	-0.00134836	-0.0469242	0
66.2	-0.0471764	-0.0471479	0.0206431	0.0302376	-0.0166031	-0.00383847	-0.0427322	0.0528006	0.0103445	-0.0106964	0
66.4	-0.0271886	-0.00245381	-0.0297212	0.00259522	-0.0200867	-0.0200647	0.0579113	-0.0229353	0.0348618	-0.000152542	0
66.6	0.00542377	0.0730156	-0.05595	-0.0108583	-0.0032239	-0.00504786	-0.0113376	-0.0036356	0.0556959	0.0156896	0
66.8	0.0231672	0.0297058	0.0589645	0.0194505	0.0053919	-0.00245938	-0.0106783	0.0423807	0.00601686	0.0121739	0
67	0.0363433	0.0030061	0.0312721	0.0411439	-0.0278159	-0.00167485	0.033505	0.0412657	0.00652868	0.018764	0
67.2	0.0315064	0.0287018	-0.0422936	0.0398806	-0.0125211	-0.00470261	0.016801	0.00924476	0.0441743	0.0075681	0
67.4	0.010719	0.0202456	0.0558307	0.0274363	0.0430498	-0.0159568	0.00367116	0.0146284	0.0080655	-0.0347617	0
67.6	0.0120432	-0.00580182	0.0777537	-0.00457456	0.0100006	-0.004827	0.0224413	0.0561765	-0.0352218	-0.0194809	0
67.8	0.00177456	-0.0396215	-0.0173384	-0.00201627	0.0114115	0.00315741	0.0149708	0.0162922	-0.0123497	0.0368679	0
68	0.0230735	0.0483127	0.0105988	0.00626755	0.00601327	-0.0443467	0.0426887	-0.00832727	-0.0144476	0.026577	0
68.2	0.0356285	0.0275476	0.0244662	0.0223638	-0.00316912	-0.00404524	0.0278319	-0.0282718	-0.0185421	0.00158924	0
68.4	0.0186548	-0.0124713	0.0197747	0.000162656	0.00133316	0.0405079	-0.0127934	-0.0208583	0.0129153	-0.0141864	0
68.6	0.00179293	-0.000699601	0.0146916	0.00645237	-0.00686672	0.0154597	0.00350175	-0.00824694	0.00165874	-0.0210834	0
68.8	-0.0112608	-0.0291845	-0.0282433	0.0504506	-0.0261411	0.011033	0.0279378	-0.0515624	-0.0505947	-0.0114586	0
69	-0.0338291	-0.00492289	-0.0161808	-0.0290298	0.00547099	0.0352995	-0.0228435	-0.0759668	-0.00398245	-0.00555831	0
69.2	-0.00822499	-0.0103054	-0.00433497	-0.0208975	0.0507713	0.0572172	-0.0171408	-0.00433763	0.000418981	0.0182083	0
69.4	-0.00851276	-0.0292801	0.00106826	0.0023522	0.0111569	0.00324918	-0.0663054	0.00796652	-0.0164942	0.013078	0
69.6	-0.00913763	-0.0230196	-0.0287	-0.0122842	-0.00423904	-0.0154896	-0.0123108	0.00651122	-0.000739457	-0.0120106	0
69.8	0.00254473	0.0223064	-0.0100673	-0.00703274	0.00987848	-0.0181088	0.0317783	-0.0113316	0.0188107	-0.00291972	0
70	0.00838571	0.0322073	0.0370949	-0.0122896	-0.00573684	-0.0161865	0.00239858	-0.032037	0.0104648	0.0214275	0
70.2	0.0173459	-0.0191422	0.00100432	-0.0518983	-0.00302366	0.0240837	0.0535111	0.00269076	0.00147872	0.0128337	0
70.4	0.0161304	0.00735551	0.00335924	0.00822696	0.0229872	-0.0455978	-0.0114835	-0.0227198	0.00287497	0.0204106	0
70.6	-0.00716349	0.00553891	0.0057738	-0.0465889	0.00968709	-0.0227203	-0.0793337	-0.00418514	-0.00924015	0.0222874	0
70.8	-0.000544772	0.0617432	-0.0120552	-0.0195413	0.0219674	0.0119511	-0.0573665	0.0241416	-0.0029596	0.0111428	0
71	0.0233804	0.0314036	0.00405056	0.0143011	-0.0124492	-0.0222618	-0.0261599	0.00179705	0.0016496	-0.0234423	0
71.2	0.0193571	-0.0522866	-0.0039552	0.0102757	-0.0355901	-0.0270463	0.0188151	-0.00442595	-0.0153636	-0.0215944	0
71.4	-0.00688929	-0.0347187	-0.0383185	0.00644147	0.0167054	0.0156418	0.0542456	0.0256071	-0.026833	0.00710529	0
71.6	-0.0148245	-0.013058	0.0133765	-0.0492768	0.00352349	-0.0127422	-0.0194812	0.00245836	-0.0169768	-0.0269795	0
71.8	-0.00400572	-0.00797527	0.00434842	0.0234196	-0.0273195	-0.0150378	0.00853293	0.00563473	-0.0110961	-0.00597571	0
72	0.00343353	-0.0158089	0.0136597	0.0292344	-0.0401499	-0.012242	0.0613288	0.00978754	0.0047003	-0.00239853	0
72.2	-0.00820953	0.00826567	0.0177825	0.0029902	-0.0144711	-0.0337889	0.00865292	-0.01608	0.00615255	-0.0290103	0
72.4	-0.0139931	-0.00300533	-0.0250497	0.00415316	0.0103839	-0.0278658	-0.0130805	0.00951611	0.0198124	-0.00567934	0
72.6	-0.0157861	-0.00965491	-0.054826	0.00437552	0.0165531	0.000923651	0.0180757	0.0370108	0.0325829	0.0283149	0
72.8	-0.0197815	0.0423113	-0.0126115	-0.00833443	0.00527922	-0.00348622	-0.0203354	0.000921633	0.0133081	-0.00172843	0
73	0.00773843	0.0105974	0.0311728	0.00423098	-0.0304527	0.00139449	-0.0143363	0.0321804	0.0165429	0.00135925	0
73.2	0.00591049	0.0310229	0.0160086	0.0580451	0.0164881	0.0428066	0.0420833	-0.00767288	0.00606991	0.0273529	0
73.4	0.0073014	0.0193058	0.0482575	0.00733545	-0.0121727	0.0535924	0.0236748	0.0414202	0.012701	-0.00983146	0
73.6	0.000944077	-0.0118727	-0.00419183	-0.00152293	-0.00709071	0.0424242	-0.0340294	0.00730903	0.0156664	-0.00709314	0
73.8	0.000747841	0.00695144	-0.0426862	0.0377465	0.0174061	0.0204308	-0.0444669	-0.0147589	-0.00184543	0.012363	0
74	0.00220554	0.0187929	-0.0207462	0.00405531	-0.0158782	0.0053598	-0.00351535	0.0292384	-0.00328827	-0.0051821	0
74.2	-0.0156475	-0.022532	-0.0791656	-0.0457163	-0.0155601	0.0255356	0.0205604	-0.0384165	0.0146068	-0.00180029	0
74.4	0.0125689	-0.0022842	0.00627697	-0.0390879	-0.00167692	0.0347213	-0.00637693	0.0378573	-0.0201991	-0.026282	0
74.6	0.00519104	-0.0751442	0.0472708	-0.0123492	0.00661124	0.04153	0.0401663	-0.000309052	-0.0564557	0.0102229	0
74.8	0.0182306	-0.0550308	0.0556392	-0.00852736	-0.00842818	0.0147087	-0.0164294	-0.0427178	-0.0268188	0.0180806	0
75	0.0126816	0.000560149	0.0370199	0.02525	0.00665865	-0.00520581	-0.0432418	-0.0322356	0.0138367	0.00889885	0
75.2	-0.0038176	0.0436515	0.00699412	0.013241	0.0151911	0.00797624	0.0173607	-0.0290904	0.00931983	0.00760536	0
75.4	0.00918392	0.0462037	0.0238453	-0.0537396	-0.0167712	0.00214535	0.0436493	-0.0117867	-0.012202	0.00133063	0
75.6	-0.00887418	-0.0814207	0.0534165	-0.00420458	-0.00763048	-0.0509931	0.0412757	0.026635	-0.00795566	0.00747629	0
75.8	-0.0149284	0.00479637	0.00267261	-0.011939	-0.0141143	-0.0798899	-0.0659692	-0.0435058	0.01647	-0.0234133	0
76	-0.0117504	0.0460943	-0.0540066	-0.0226233	0.0285861	-0.0342179	-0.0279165	-0.0149043	0.0033093	0.000815116	0
76.2	-0.00511591	0.0420693	-0.0383122	-0.0155721	0.0316315	-0.00657933	-0.0319985	-0.0448224	0.00382975	-0.00151639	0
76.4	-0.0110747	0.0149148	-0.024403	0.00744851	0.00984415	-0.0252638	-0.0588505	-0.0333492	0.0196013	-0.0170485	0
76.6	-0.0133256	0.0136076	-0.0342535	0.0167115	0.000796973	-0.033807	-0.0184143	0.0436257	0.00269835	-0.00671554	0
76.8	-0.00130349	0.04577	-0.0104756	-0.0105441	-0.00769565	-0.0156535	0.00574063	0.0157774	-0.0155526	0.000450341	0
77	-0.0151172	-0.0463229	0.00234062	-0.00835846	0.0283237	-0.00620306	0.0495974	0.0505801	0.0214357	0.023702	0
77.2	0.00602982	0.0176936	0.0437168	0.0243226	-0.0115723	-0.0121609	0.0250205	0.029147	0.0104594	-0.0166869	0
77.4	0.000394893	-0.0377431	-0.0241604	-0.00490929	-0.0250921	-0.0395172	-0.0255948	-0.0339285	-0.019113	-0.0380212	0
77.6	-0.035473	-0.0989987	-0.0556401	0.00438098	-0.0195648	-0.00465576	-0.0232876	-0.0420536	-0.0167314	5.56444e-05	0
77.8	-0.0201584	-0.0155743	-0.0122189	0.0144755	-0.0238945	0.0412329	0.00729646	0.0155785	-0.024154	0.0065092	0
78	0.0329619	0.041493	0.0146324	-0.0146254	-0.0129743	0.0285439	-0.00310774	0.0487691	-0.0263258	-0.034379	0
78.2	0.0150639	-0.031483	0.028315	0.0184702	0.00535951	0.0290306	-0.0359013	0.0297231	0.0201672	-0.00700637	0
78.4	-0.0288909	-0.037625	-0.0207626	-0.00251076	0.000808813	0.0284871	-0.0264981	0.0561826	-0.0184941	0.0494044	0
78.6	0.0041999	-0.0168221	0.000856791	0.0128174	-0.020471	-0.00712411	-0.0232061	0.0352951	0.00149526	-0.0086729	0
78.8	0.008156	-0.0021649	-0.000893917	0.0399216	0.00137167	-0.0331047	0.0277379	-0.0253178	0.0191446	-0.0168662	0
79	0.00593561	-0.00567922	0.00106247	-0.00969001	-0.00162925	-0.0271482	0.0182683	-0.0821541	0.00617269	0.0277312	0
79.2	-0.00464175	-0.0260866	0.0106759	-0.0522622	-0.00725972	-0.0168985	0.00800963	-0.046383	0.0087568	0.0403066	0
79.4	-0.03821	-0.0264624	-0.0106565	-0.0046805	0.0252094	-0.00392246	0.062328	0.0231507	0.0234662	0.0337842	0
79.6	0.00508935	0.0210759	0.00427707	0.0181675	-0.00560578	0.0231498	-0.0203248	-0.0471035	0.0142515	0.0106581	0
79.8	-0.00799713	0.0539548	-0.0266632	0.0358537	0.0120453	-0.00841604	-0.021525	-0.0102779	-0.00516774	-0.035199	0
80	-0.0148646	0.0314107	0.0322871	-0.0107506	-0.0198993	-0.00333845	0.0560177	0.011941	-0.0337315	-0.0121495	0
80.2	-0.00168695	0.00524261	0.0243293	0.00659428	-0.00189362	0.0013104	0.0442635	-0.0201658	-0.0261067	0.0143586	0
80.4	0.0158541	0.0339496	-0.0181628	0.0225691	0.0496687	0.00994422	0.00593787	-0.00791293	0.029975	0.0076516	0
80.6	0.0206949	0.0538696	0.00309473	-0.0190456	0.0322151	0.0341607	0.0104254	0.00842129	0.035978	-0.0113233	0
80.8	0.00980351	0.0171847	0.00151623	-0.00404837	-0.0107714	0.0285556	0.0134018	-0.0226705	-0.0280421	-0.028088	0
81	0.0151361	0.0362142	-0.012919	0.00281949	-0.00540351	0.0299439	0.0609908	0.045416	-0.00453629	-0.00561755	0
81.2	-0.0116694	0.0152141	-0.021798	-0.0329667	0.010169	0.0444328	-0.0469619	0.00255506	-0.0275215	0.0154901	0
81.4	-0.0178243	0.0033429	0.00866842	-0.023378	-0.024099	-0.010826	-0.0053517	0.0123353	-0.0019029	0.0268839	0
81.6	-0.00358575	-0.0172141	0.0373418	-0.0143957	-0.0102427	-0.00995437	0.0477588	0.00899767	0.0132512	0.0202207	0
81.8	-0.00369096	-0.0592742	0.00540592	-0.00677177	0.038909	0.0201265	-0.0223898	0.0185454	0.0026146	0.0188411	0
82	-0.0063746	-0.0508968	-0.0192529	0.0310219	0.0274639	-0.0199909	-0.0830297	0.0693873	0.00859253	0.0146149	0
82.2	0.00762207	-0.00833651	0.024738	0.0241074	-0.00592431	-0.0334759	-0.0775154	-0.00494535	-0.0164436	-0.0248896	0
82.4	-0.00103233	-0.0681296	-0.0249371	-0.0288419	-0.0161909	-0.0251064	-0.00201042	-0.0373118	-0.00898371	-0.0172356	0
82.6	-0.00676604	-0.0036791	-0.0112836	-0.0401933	0.000348418	0.0106517	0.0361377	-0.0330898	0.0282241	-0.00870367	0
82.8	0.0252794	0.0171707	-0.0256377	0.017999	0.00372579	-0.0332677	0.0396001	0.0185212	-0.00242378	-0.0294978	0
83	0.0312424	0.00387436	0.0245281	0.0671109	-0.0054078	-0.052247	0.019476	0.0163426	-0.0111229	-0.0143684	0
83.2	0.002181	0.0307263	0.0640441	0.0115124	-0.020733	8.34647e-05	-0.0173011	-0.00401824	0.018547	0.018805	0
83.4	-0.00185708	0.0377502	-0.0213191	-0.0746585	-0.0125505	0.00100725	-0.030949	0.0306401	-0.00454033	-0.000587842	0
83.6	-0.00337515	0.0345546	0.0093989	-0.0256004	0.0384463	-0.019095	0.00562039	-0.0211344	-0.00460631	-0.0127624	0
83.8	-0.0089132	-0.0168527	-0.070637	0.00634215	-0.0202594	0.0235819	0.0494767	-0.0352987	0.00657118	0.00717168	0
84	-0.00953589	-0.0357515	0.0185038	-0.00993765	0.0189688	0.0343243	0.00331874	-0.0329981	-0.028472	0.0193103	0
84.2	0.00696637	0.00549405	0.0653864	0.00663862	0.0152568	0.00255053	-0.00836104	0.00863052	0.0145934	0.0221921	0
84.4	0.0306413	0.0340211	0.00165793	0.00409111	-0.0196056	-0.00267492	-0.0326992	0.0275881	0.0420515	0.00181252	0
84.6	0.0129429	0.0258696	-0.023713	-0.0210924	0.00333045	0.0258809	-0.0512421	0.0123347	-0.00892653	-0.0138042	0
84.8	-0.0305492	0.0140706	-0.0185238	0.00963603	-0.00470116	0.0214585	0.0413175	0.0138907	-0.000455087	0.00174656	0
85	0.0205748	-0.0217403	0.0295926	0.00386517	0.0174762	-0.012777	-0.0141558	-0.0632625	-0.0224403	-0.0352253	0
85.2	0.0636344	0.0199229	0.0125037	0.0750909	0.0223432	0.0204005	-0.0156616	-0.0357753	-0.0400721	-0.0202493	0
85.4	0.0023505	-0.0064911	-0.0373406	0.0116523	0.00214841	-0.0526846	0.0195805	0.00723309	0.00508447	0.0184119	0
85.6	-0.0374755	0.0241909	0.000379764	-0.00458138	-0.000773138	-0.039642	-0.0214643	0.0261444	0.0267823	0.0101771	0
85.8	-0.00648841	0.0835891	0.0467966	0.0129858	0.00780407	0.0335481	-0.0115009	0.0446871	0.00944049	-0.0110596	0
86	0.0180144	0.0240779	-0.0010824	-0.0498526	-0.0119842	-0.00080317	0.0744325	0.0405546	0.0217633	-0.000444207	0
86.2	0.014211	-0.0264499	-0.00679013	0.0155954	-0.031132	0.0118126	0.010371	0.0136299	0.027837	0.000135237	0
86.4	-0.0415544	-0.0527069	0.0547173	0.0129647	0.0077486	-0.027044	-0.00743981	0.0197942	-0.0088137	-0.0027021	0
86.6	-0.0169212	-0.0446214	-0.0325398	0.0281456	-0.00630893	-0.00274334	0.0444631	0.00715577	0.0194221	0.000679645	0
86.8	-0.0233767	-0.0555922	-0.0259509	0.0079276	-0.0363721	0.0347237	0.0374814	0.0150009	-0.0126459	-0.0169237	0
87	-0.0290168	-0.0376555	-0.0202392	-0.00292923	-0.0339028	0.00115486	0.0230401	-0.0178134	-0.0237706	-0.0100455	0
87.2	-0.0108266	-0.010909	-0.0716012	0.000621347	-0.0100328	-0.034533	-0.0120896	-0.0430164	0.0225081	0.00499553	0
87.4	-0.0255848	-0.0381239	-0.00140012	-0.0248431	0.0066196	-0.00685467	-0.0871767	0.00276745	0.00214553	-0.0175572	0
87.6	0.0174226	-0.00979081	0.0138456	0.029146	-0.00204488	0.00256248	-0.0164703	-0.0549485	-0.0118661	0.000704657	0
87.8	0.011408	0.0292462	-0.0379517	0.0296008	0.00430469	0.034091	-0.0510228	-0.0505347	-0.0307518	0.00360732	0
88	-0.0151151	0.00507539	-0.0355076	-0.010318	0.024152	-0.0145084	-0.0355435	-0.0362831	-0.0213847	0.0173286	0
88.2	0.00194185	0.0176278	-0.030389	0.00432292	0.00983556	-0.0278674	-0.00228671	-0.00438569	0.0137501	0.0196807	0
88.4	0.0283955	0.0282436	0.015545	0.0102973	-0.00988256	0.00654402	0.0126617	0.0191541	0.0135144	0.0129568	0
88.6	0.0279001	0.00319734	0.0871144	-0.0320124	-0.00922514	0.0259484	0.0235407	0.0257128	-0.0195343	0.00161509	0
88.8	0.0334345	0.0387806	0.047717	-0.0186477	-0.020659	0.0532066	-0.0051239	0.0533972	-0.0128036	-0.0243327	0
89	0.029663	0.0227374	0.0322127	0.000374596	-0.00621256	0.0162956	-0.003189	0.00624557	0.00626401	-0.00434608	0
89.2	-0.00293572	-0.0349829	0.0309578	-0.0549117	0.0175603	0.0154418	-0.0117258	-0.0274098	-0.012899	0.00229965	0
89.4	-0.0014449	-0.0497166	0.0202713	-0.0394878	0.0365142	-0.00921575	0.0420138	-0.0320073	-0.0133544	0.0247493	0
89.6	0.00324089	0.0170779	0.00551128	0.000729725	0.0192069	-0.00676792	0.0930923	-0.0139585	-0.021019	0.00820268	0
89.8	-0.0134275	0.0442182	-0.0110769	-0.00766893	0.00966385	0.0149773	0.068979	0.00371399	-0.012759	-0.023218	0
90	-0.0145266	-0.00903091	-0.0333002	-0.0271552	0.0207387	-0.00963748	0.00575304	0.0055588	0.0393189	-0.00385272	0
90.2	-0.00977538	-0.00219085	-0.0403659	-0.0290144	-0.0141703	-0.0219643	-0.0404876	0.023907	0.0331988	0.00742093	0
90.4	-0.0255567	-0.0325623	-0.0160214	0.0384271	0.0186805	-0.0478555	-0.00817999	0.0421236	-0.00647102	0.0357751	0
90.6	-0.00911466	-0.0039895	-0.0473128	0.00801897	-0.00527388	-0.0177559	0.000533273	-0.0245929	-0.0285721	0.00924526	0
90.8	-0.00687316	0.0119746	0.0167375	0.0444884	-0.0256206	0.00066784	-0.0376836	-0.018013	-0.00936882	0.00414291	0
91	-0.00267318	0.00120454	0.0329226	0.0963282	-0.00139114	0.00599268	-0.0583504	0.0175058	0.00655284	0.00256242	0
91.2	-0.0025328	-0.00706984	-0.0129185	0.0330711	0.00339199	0.0234676	-0.0326027	-0.00841743	0.00111621	-0.0146907	0
91.4	-0.0277944	-0.020889	0.0439342	-0.0358147	-0.0121607	0.0160038	9.11561e-05	-0.00578321	0.00742077	0.00751122	0
91.6	0.01876	0.00164246	-0.0213194	-0.0454531	0.011765	0.00562505	0.00913219	0.0221868	0.0188148	0.0103761	0
91.8	0.024771	0.00123989	0.0213321	-0.0349673	-0.00842075	0.0171149	0.00208405	0.0140326	0.0301127	-0.00763608	0
92	-0.0131801	0.0205834	0.0237043	0.00752741	-0.0100643	-0.0307023	-0.00396432	0.00851935	-0.0204377	-0.00655752	0
92.2	-0.0131786	0.044629	0.00206054	0.0428601	0.00881473	-0.0291563	0.0219758	0.0303845	-0.0143798	-0.00391297	0
92.4	0.014689	0.0482764	0.0115043	0.0231694	0.0196196	-0.00174707	0.0322014	0.00613803	0.0258936	-0.0219084	0
92.6	0.0157678	0.0334991	0.00144453	-0.0190915	0.00938534	-0.0195854	-0.00621823	-0.031276	0.0160912	-0.0237198	0
92.8	0.00942284	0.00155264	-0.0233798	-0.0227541	-0.0170718	-0.00138603	-0.0307028	0.012104	0.0119481	0.00648581	0
93	0.0138526	-0.017835	-0.0265792	-0.00466057	-0.00125653	-0.00694152	-0.0196814	-0.0283119	-0.0277661	-0.00870511	0
93.2	0.00998455	-0.0162784	-0.0816445	0.0431783	0.0170478	0.0114601	0.055294	-0.0131337	0.00418148	-0.00474119	0
93.4	0.0131912	-0.0461454	-0.00839566	0.036044	-0.00385993	0.0265458	0.0344784	0.0181715	0.0415686	0.0218066	0
93.6	0.00460694	-0.00872873	0.010687	-0.00839689	-0.0144264	0.00299163	-0.0324389	0.0160436	0.0167821	-0.0158048	0
93.8	-0.0122343	0.0164929	-0.0578555	-0.0151781	0.0131291	-0.00265519	-0.0117083	0.0027432	-0.0110933	-0.0366413	0
94	-0.010057	-0.035779	0.0130277	-0.00396425	0.00992909	0.0290549	0.0247254	0.0140638	-0.00681413	0.0172054	0
94.2	-0.00445826	0.0249555	0.100362	-0.0197	-0.0464709	0.0105732	-0.0256829	0.0452717	-0.024611	-0.0152776	0
94.4	0.00444503	-0.0717114	0.0740841	0.0128419	-0.0230605	-0.00138287	0.0014393	0.00838265	0.0070368	0.00401551	0
94.6	-0.0174129	-0.00531974	0.00364166	-0.0266868	0.0123313	-0.0306204	-0.0029324	-0.0284065	0.00538205	-0.0426663	0
94.8	-0.00732753	0.01365	0.00953471	-0.0513351	0.0159062	-0.0306907	-0.00439462	-0.0188804	0.0157134	0.00458063	0
95	-0.00167054	-0.0273832	-0.000145288	-0.0392065	0.0119818	0.00216992	-0.00399684	0.00123177	0.010072	0.0453167	0
95.2	-0.00766023	0.00826036	-0.0322722	-0.023933	0.01464	0.00102665	-0.0254429	0.0107071	-0.0194773	-0.0259685	0
95.4	0.0250957	0.0117465	0.0226285	0.0153693	0.0114654	-0.0263506	-0.0144899	0.0147341	-0.00270365	-0.00851154	0
95.6	-0.00295551	0.0205881	0.00882574	0.0174489	0.00578088	-0.00132948	0.0183365	-0.0171484	-0.00411651	0.0591002	0
95.8	0.00294123	0.0250509	-0.0115435	0.0147826	0.00146574	-0.0247758	0.0463355	-0.0365087	0.0199593	0.00836625	0
96	-0.00214901	-0.0059071	-0.0252472	0.0125917	-0.00244911	-0.00647677	-0.00740002	-0.0534083	-0.00644257	0.00554985	0
96.2	-0.0174898	0.00470684	-0.018477	-0.00229151	-0.0260188	0.0218241	-0.0364571	0.00974695	-0.0112886	0.00870651	0
96.4	0.001314	0.0412137	0.00786874	0.0304546	-0.0294032	0.0229933	-0.010073	0.0716304	0.0191053	-0.0291558	0
96.6	0.0157682	0.0152565	0.0113806	0.0706765	-0.00559373	0.0239069	0.0143544	0.0320073	-0.000826755	-0.0172498	0
96.8	-0.0171037	-0.0244789	-0.00560891	0.00502978	-0.0159971	0.0168147	0.0673932	0.00408464	-0.0294006	0.0229606	0
97	0.00598213	0.0144669	0.0227433	0.00819938	-0.00169221	0.0201174	0.0942299	-0.00700869	0.0131644	-0.00577663	0
97.2	0.0139843	0.0570505	-0.0340541	-0.0258309	-0.0124082	3.81945e-05	0.0187166	0.0028624	-0.00253211	0.0315222	0
97.4	0.0047895	0.0299066	0.0198864	-0.021422	-0.00427383	-0.0126594	-0.0969089	-0.00615835	-0.0246313	0.0120083	0
97.6	-0.0131148	-0.0390183	0.0557883	-0.0204608	0.00620442	-0.0287686	-0.0414679	-0.00696596	-0.0291783	-0.0258359	0
97.8	-0.0201646	-0.0581227	-0.000995771	-0.0243048	0.0196646	-0.015744	0.0596979	-0.00126611	-0.0116477	-0.000160755	0
98	0.00118343	-0.018844	0.011574	0.0305662	0.0531298	0.037207	-0.0291247	-0.0148726	0.0238532	0.00898922	0
98.2	0.00627944	-0.00396427	-0.00761875	0.0240696	0.0308685	0.00570662	-0.0811799	-0.00502955	0.00391638	-0.0098777	0
98.4	-0.0103827	0.0304981	-0.0534817	0.00669204	0.011181	-0.0325749	-0.0655879	-0.0263793	0.0104752	0.0310941	0
98.6	-0.00848212	-0.0230816	-0.049359	0.0250822	0.0250008	0.015997	-0.0507187	0.01367	-0.000880634	0.0308028	0
98.8	-0.00489227	-0.0290383	-0.00154556	0.0326453	-0.0213576	0.0187628	0.00120587	0.00176963	-0.0272712	-0.0164642	0
99	0.00387425	0.00984963	0.0247736	0.0257276	-0.05513	-0.0195613	0.0636183	0.0012378	-0.0011945	-0.0247189	0
99.2	0.0118219	-0.00971314	0.0137511	-0.00409436	-0.0145005	-0.00274483	0.0710704	0.0302516	0.0449958	-0.00370777	0
99.4	-0.0128505	-0.0303801	-0.00348345	-0.0622423	-0.00655583	0.0148562	0.0507724	-0.0504808	0.0172775	-0.0119769	0
99.6	-0.0194986	-0.0184311	-0.0214873	-0.0266454	-0.00662026	-0.00920938	0.0249284	-0.0339288	-0.00632737	0.00982023	0
99.8	0.0151041	0.0196301	0.0105142	0.0187192	-0.009435	-0.0109595	-0.043639	0.0218214	0.0462214	-0.00732253	0
100	0.0136267	-0.000181527	-0.00213137	-0.0127941	0.0170691	0.000330883	-0.00927115	0.00518865	0.0021987	-0.0140996	0
100.2	0.0116562	0.0156676	0.0102065	-0.0051558	0.0155974	0.0242847	0.0349617	-0.0108989	-0.0414803	-0.00499971	0
100.4	0.0112917	0.0507526	0.0157812	0.056125	-0.0111284	0.0250114	0.0116834	0.0121876	-0.00504116	-0.00343159	0
100.6	-0.000917673	-0.00483482	-0.0427299	0.0343825	-0.0121829	-0.00990302	-0.00637361	0.00309381	0.00330928	0.00524215	0
100.8	0.0192138	-0.0395899	-0.017269	-0.0518798	-0.00942248	-0.00800959	-0.024456	-0.0352005	-0.0283548	0.0181647	0
101	-0.0348219	0.0415294	0.0310238	-0.0478463	0.0180038	0.00415978	-0.0553162	-0.0380954	-0.0238777	-0.00830868	0
101.2	-0.0134587	0.0207249	0.0651751	7.16525e-05	0.00634496	-0.0127334	-0.0433827	-0.0290422	0.0189575	-0.0154259	0
101.4	0.0313601	-0.0394243	0.00614519	-0.0187286	-0.00217072	-0.00910815	0.0246396	0.00489898	0.000173532	-0.0114276	0
101.6	0.0265888	-0.0178462	-0.0438703	-0.0496621	0.00395127	0.0129793	0.0306558	0.0160781	0.000399096	0.01983	0
101.8	0.012182	0.0204216	-0.00942715	-0.0186603	0.0045686	0.0232427	0.0198701	0.0136703	0.0219309	0.0251016	0
102	0.0232579	-0.00849929	0.007739	0.0229065	0.00829125	0.0228509	0.0567566	0.0396354	-0.0296107	-0.0212308	0
102.2	0.0240976	-0.0190417	-0.0251211	0.0219561	0.00820808	0.00354594	-0.0382435	0.0180581	-0.00983079	0.0149495	0
102.4	0.0154155	0.0142337	-0.0420877	-0.00102132	-0.00275601	-0.0127932	0.00245098	0.024638	0.0522926	-0.0211159	0
102.6	-0.00745882	0.0344013	0.00773788	0.0301276	-0.0131805	0.00431186	-0.0194891	0.0147534	0.0302305	-0.00884697	0
102.8	-0.0215673	-0.0159865	0.021483	0.0474395	-0.010913	-0.0319095	-0.0362982	0.0290662	0.00098142	0.00927901	0
103	-0.00930065	-0.0228633	-0.0196542	0.039159	0.00201303	-0.0463464	0.0253086	0.0202426	0.00230933	-0.000223888	0
103.2	-0.0124263	0.0375625	-0.0112633	-0.0203961	-0.00344185	-0.00829392	0.0368894	-0.0482138	-0.00472698	-0.00676152	0
103.4	-0.0468714	0.0123911	0.0284824	-0.114508	-0.0254917	-0.0424481	-0.0372765	-0.0539504	-0.0131623	-0.0131202	0
103.6	-0.019221	-0.0104002	-0.0358109	0.0226056	0.000823984	-0.0119833	-0.0706717	-0.00514733	-0.0472605	0.0330774	0
103.8	-0.0123342	-0.0025792	-0.0224536	0.0138683	-0.0059972	0.00333458	-0.0598434	-0.0438511	-0.0327712	0.00612532	0
104	-0.00134788	-0.000656352	0.00698085	-0.0109087	0.0154045	-0.0219487	0.0221092	0.0284553	-0.00341637	0.00733619	0
104.2	-0.00281211	0.0315001	0.0201088	0.0289398	0.00489609	-0.00356596	0.0725645	0.0216022	0.0193805	0.00647131	0
104.4	-0.0210678	0.027798	0.0291102	0.0194122	-0.0141469	0.0333668	0.0319509	-0.0414845	0.0143418	-0.00833367	0
104.6	-0.0114427	-0.0212578	0.0129957	-0.0175935	0.0317236	0.0242521	0.00388435	0.0241374	-0.00395084	0.00554707	0
104.8	0.0120331	0.0198814	-0.0106964	0.0185522	0.0225711	0.0317078	0.0261317	-0.00117393	0.028823	-0.0175719	0
105	0.0136459	-0.0700193	-0.00971869	-0.0190682	-0.0133398	0.0240641	-0.0331511	0.065702	0.0235445	0.0016363	0
105.2	0.0188984	-0.0398723	0.0455142	-0.0112965	0.0180326	0.0398546	0.0250718	-0.00975801	-0.00424165	-0.00248572	0
105.4	0.011478	-0.0269936	0.0435984	0.00547298	-0.00885644	-2.46534e-05	0.110928	-0.00887301	0.00358824	0.00206216	0
105.6	0.0175451	-0.00055305	-0.0114866	-0.0143509	-0.0233179	-0.0271441	0.0303032	0.0585667	0.0086734	-0.000908604	0
105.8	0.0131777	0.0317767	-0.0230975	-0.00667717	0.0123858	-0.00253329	-0.0866126	0.0529951	-0.0248145	-0.0236493	0
106	-0.0297735	-0.0558112	0.000490311	0.0364513	-0.0269822	-0.015644	-0.0338023	0.0215709	-0.042336	-0.01866	0
106.2	0.00203869	0.0196446	-0.0113337	0.0139724	-0.0227766	-0.00843588	-0.00905209	-0.0805838	-0.0202585	-0.00926666	0
106.4	0.00913634	0.0810882	-0.0234492	-0.00811829	0.0337114	-0.00908007	-0.0670623	-0.0265509	-0.0142587	0.0235993	0
106.6	-0.00706199	0.0181586	-0.0103788	-0.0161004	0.0317144	0.00732034	0.00580156	-0.00941375	-0.0118071	0.0114679	0
106.8	0.00773819	-0.0201362	0.0153172	0.0255025	-0.0181689	0.000686358	0.0469222	-0.0302886	0.0167967	0.00751024	0
107	0.017826	-0.00189592	-0.0134651	0.00326062	-0.0226125	-0.00224188	0.00875085	-0.0214906	0.0303785	0.00909509	0
107.2	0.0115964	-0.00397182	-0.0439642	-0.0635625	0.0194304	0.0229798	0.00607469	-0.011091	0.0207394	-0.0158279	0
107.4	0.0345942	-0.0134956	0.0245781	0.037721	0.0280813	-0.000139654	-0.0206585	0.00583912	0.0286571	-0.00863181	0
107.6	-0.00710151	-0.049096	0.010053	0.0744516	0.0171628	-0.0282961	-0.0213111	0.0237011	-0.0134555	-0.00262838	0
107.8	-0.0188465	0.0373564	0.0191725	-0.0500465	-0.00234028	0.00533987	-0.0230088	0.000132757	0.0110152	0.00314112	0
108	-0.0126571	-0.0197307	0.00325323	-0.0614293	-0.0385961	-0.000275722	0.00573183	-0.0371925	0.0115116	0.00965612	0
108.2	-0.019953	-0.02826	0.00496214	0.006082	-0.0162171	-0.00850732	0.0533365	-0.0233896	-0.0160008	0.0134016	0
108.4	-0.00243256	0.0653751	0.0356675	0.0137586	0.0118311	0.0201679	0.0369863	-0.00733761	-0.0111336	0.0097375	0
108.6	0.0242161	0.00687995	-0.0012783	-0.00514808	-0.0333122	0.0309273	-0.011556	-0.0195367	0.00107982	-0.00386223	0
108.8	-0.0122221	-0.0188223	-0.0499139	-0.0358818	-0.0113427	0.0355477	0.0337317	0.0399988	-0.00912393	-0.00957295	0
109	0.0191938	0.0323411	0.01698	-0.00882261	0.0332291	0.0212678	0.0139088	0.0404865	-0.0131685	0.0228853	0
109.2	0.0132785	0.0589232	0.0072158	0.0314417	-0.0048229	0.0156653	-0.000548834	0.0120995	0.00222627	0.021279	0
109.4	-0.0155018	0.0362501	0.000788133	-0.00496229	0.00126114	-0.0350975	0.040987	0.0356457	-0.00286573	0.00993261	0
109.6	0.00100879	-0.0308093	0.0258406	-1.7822e-05	0.0361863	-0.0382874	0.0230475	0.0623024	-0.00187876	0.00510964	0
109.8	-0.00303474	-0.0377352	0.00438112	0.0661022	0.0183249	0.0215736	-0.0642249	0.0396296	0.00467154	-0.00973407	0
110	-0.0609771	0.0379431	-0.00698371	0.0289577	0.00225918	-0.0166629	-0.0643524	0.00875955	-0.0194101	-0.0226998	0
110.2	-0.0100586	-0.0557892	0.0320991	-0.0117069	-0.0185268	-0.0708536	0.0115516	-0.0217992	0.000846413	-0.0197088	0
110.4	0.0159766	-0.060141	-0.0285726	-0.0141677	-0.0214985	-0.0117611	0.0675134	-0.0174995	-0.00588639	0.00911908	0
110.6	0.00141764	0.00552479	0.00818683	0.0107004	-0.0301372	-0.00253497	-0.0315194	-0.0120234	0.0268284	-0.0214617	0
110.8	-0.0133069	-0.0102177	0.0106694	0.0140802	-0.00539268	-0.0135565	-0.0480792	0.0162697	0.0476218	-0.00844849	0
111	0.011408	-0.00560059	-0.0108596	0.00744955	0.0153713	-0.00806284	-0.0117117	0.00476337	0.0165957	0.00575384	0
111.2	0.0361565	0.0101751	0.0290969	0.0215198	-0.0110203	-0.0222131	-0.0511179	-0.044397	0.000228816	-0.0500316	0
111.4	-0.0111366	-0.103222	-0.0554833	0.00582908	-0.0042565	-0.00474062	0.0142388	-0.00390964	0.0194346	-0.0158103	0
111.6	-0.0184662	0.0942356	-0.0645099	-0.0623738	0.0150523	0.0120955	-0.0263654	-0.0337038	0.0147188	0.0291296	0
111.8	0.00614883	0.0899247	-0.0318867	-0.0648687	-0.00349315	0.0306544	0.0158254	-0.0501229	-0.0192646	0.0295447	0
112	0.00462257	-0.0273336	0.0379749	-0.0463778	-0.00669651	0.0337881	0.0147625	0.00613186	0.0110225	0.0050982	0
112.2	-0.00514047	0.0250274	0.0273745	0.0312679	0.00579491	0.0194188	-0.00579822	0.0308595	0.00641522	0.0170674	0
112.4	-0.00396804	0.0728091	-0.016332	0.0873096	0.000436501	0.00120194	0.0270045	-0.020797	-0.0427214	0.0251272	0
112.6	0.000569036	-0.0416904	0.0268907	0.00419441	0.00575935	-0.0102977	0.0210702	-0.0503752	-0.0170348	-0.00833622	0
112.8	0.0241394	-0.0164858	0.00213521	-0.0208666	0.0322527	-0.00901975	-0.0137104	-0.0171195	-0.0131278	0.01057	0
113	0.00670805	-0.00795439	0.0411096	-0.00885073	-0.0148284	-0.00745254	-0.0253768	0.031397	-0.0214086	-0.0175633	0
113.2	0.00157217	-0.00410179	-0.0106686	-0.0162385	-0.00659703	0.00320126	-0.051245	0.0726478	-0.0123245	0.0183502	0
113.4	0.00885055	-0.0232491	-0.0148884	0.01333	0.00746247	0.00565243	-0.00757228	0.063714	-0.00833099	0.0122689	0
113.6	0.00678078	0.00541569	0.0174447	0.0536696	-0.00242448	0.0150808	0.02761	-0.00623839	0.00966107	-0.0263086	0
113.8	-0.00389717	0.0423738	-0.00931841	0.00547208	-0.000799975	0.0167403	-0.00920838	-0.0573889	0.0170269	-0.011508	0
114	-0.0187824	-0.0438398	-0.00153885	-0.069974	-0.00534515	-0.0150447	0.00958763	-0.0195955	-0.031926	-0.00862274	0
114.2	-0.0148352	-0.0458469	-0.0162912	-0.00967591	0.00749312	0.00731428	0.028243	0.0278197	-0.0140227	-0.00769763	0
114.4	0.0324577	-0.050563	-0.000720027	-0.000505128	0.00640312	0.00179029	0.00580413	0.0252308	0.0093188	-0.026595	0
114.6	-0.0128445	0.00640868	0.0511427	-0.0210853	-0.00765656	-0.014918	0.0503617	-0.00210836	-0.0108973	-0.0185427	0
114.8	-0.0432397	0.00369138	0.0283907	0.0134151	0.000355754	-0.010584	0.0482644	-0.0160669	0.00247828	0.0242298	0
115	-0.00568905	-0.027851	0.00294605	0.0258116	0.0287712	0.025122	-0.0294449	-0.000866331	0.0246653	0.0267649	0
115.2	0.00904342	0.0108797	0.00327989	0.00142999	0.0264024	0.0327244	-0.0448069	-0.00381695	-0.0122517	-0.0161749	0
115.4	0.0207015	-0.0105949	-0.119764	0.0465403	-0.0135444	-0.0250773	-0.0344859	-0.0492151	-0.0225563	-0.0113758	0
115.6	-0.0109227	0.0524581	-0.039615	-0.0348975	-0.0125172	0.0352173	-0.0739935	0.00827672	-0.000481708	-0.00906586	0
115.8	-0.0102182	0.00419837	0.0585373	-0.00171677	-0.0312941	0.00555192	0.00911463	0.013225	0.0265268	0.0249888	0
116	0.0195992	-0.000749013	-0.00881016	0.0428636	-0.0178992	-0.0136091	0.0391516	0.0130093	0.0427114	-0.00664424	0
116.2	0.00536072	0.0317691	-0.0140701	-0.00545222	0.0171483	0.00394907	0.0250369	0.00132351	0.0485853	-0.00709397	0
116.4	-0.03128	0.00952649	0.0648444	-0.0536742	0.00091739	-0.00736585	-0.00736205	-0.0314344	0.0264402	0.0223204	0
116.6	-0.0170584	0.0101606	-0.00326875	-0.0396344	-0.0354018	-0.00540251	-0.0592059	-0.0269703	-0.0210505	-0.0336595	0
116.8	0.0012504	0.0134683	-0.0347995	-0.0117275	-0.00272447	0.0094098	0.0995921	-0.0413451	-0.0314533	0.00875028	0
117	0.0125756	-0.0161999	-0.040268	0.0160848	0.0277773	0.0109576	0.0404054	-0.00660544	-0.023663	0.0191525	0
117.2	0.0269353	-0.0490458	0.0238208	0.00361161	-0.00899714	-0.0245265	0.0131334	0.0270966	-0.00560359	0.0102877	0
117.4	0.0174519	-0.00237866	0.0789289	0.00379457	-0.0170592	-0.0257022	0.0136068	0.0175035	-0.00703785	-0.0168799	0
117.6	0.0115246	0.0470035	0.0243781	0.0317466	0.00874921	0.0162447	-0.0339022	0.0443533	-0.0135155	-0.00848667	0
117.8	0.0223333	0.0409371	-0.0539004	0.0129101	0.00571197	0.0203019	-0.0156178	0.0710532	-0.00379599	0.0314456	0
118	0.0147847	0.0430018	-0.0220674	-0.0396134	0.00960252	-0.00679447	0.0603718	-0.00760995	0.0091424	0.00290426	0
118.2	0.0384679	-0.0307912	-0.00010667	0.0138726	0.0193672	0.0311967	0.0177698	0.0191408	0.0414778	0.00214817	0
118.4	-0.000123893	0.0217378	-0.00162482	0.041124	0.0170184	0.00609813	-0.025383	-0.00048657	0.012433	0.0340781	0
118.6	0.00498054	0.058076	0.0465071	0.0202349	0.0301778	-0.000248991	0.00885705	-0.0452144	0.00462511	0.00459567	0
118.8	0.0203006	0.00155562	0.0313859	0.00664406	0.0228546	0.0165172	0.00940213	-0.0131239	-0.00437534	-0.0193475	0
119	-0.0181773	-0.0341186	0.000506102	0.0133866	-0.000507811	-0.0106244	-0.0169582	0.0287462	-0.00525715	-0.0146984	0
119.2	-0.0311253	-0.0269606	0.0226443	0.00601749	-0.00646251	-0.03278	0.0130995	0.013029	0.0202191	-0.0411601	0
119.4	0.00104166	-0.0620274	-0.069624	-0.0153984	-0.0296698	0.00459881	-0.00227105	0.0298471	-0.0192542	-0.0334961	0
119.6	-0.0530048	-0.0232181	-0.00204943	0.00758557	-0.0160767	-0.0362053	-0.0490794	-0.0093077	0.0276745	0.00805444	0
119.8	-0.050833	-0.00462054	-0.00199965	-0.0106316	-9.49686e-05	-0.0525946	-0.056438	0.00147503	-0.00860263	0.0256782	0
120	-0.0256306	-0.0116194	0.0400481	-0.00315585	0.001652	-0.00783978	-0.0100547	0.0463095	0.00442525	-0.000556985	0
120.2	-0.0200777	0.0261596	0.0234013	-0.0034185	0.00722391	0.00649471	0.0338981	0.0461591	0.0552995	-0.0146652	0
120.4	-0.00217722	0.0494097	-0.0599306	-0.0145296	-0.000299358	-0.0283068	0.0280381	0.0311076	0.0314617	-0.00140497	0
120.6	0.0097079	-0.00121816	0.0197023	0.0275553	-0.0233257	-0.0313881	-0.000392057	0.0570813	0.0159454	-0.00595324	0
120.8	-0.0202041	0.0205673	0.0266288	-0.0100259	0.00532701	-0.0116995	0.00593416	0.0476261	0.0433025	-0.00416891	0
121	-0.0232105	0.00743623	0.0580709	0.00702959	-0.00177592	-0.00661966	0.0285629	0.01098	0.0440362	0.0160832	0
121.2	0.00737573	-0.035585	0.0424197	0.0118591	0.00481093	-0.020172	0.0465415	0.0878743	0.0328497	0.01611	0
121.4	0.0154084	-0.0391906	-0.0157741	0.00545761	-0.00676422	-0.0218623	0.00697102	0.109929	0.0410368	-9.20018e-05	0
121.6	-0.000144888	-0.0300601	-0.0439174	0.0192344	0.00976348	-0.0194242	-0.0269595	0.0458149	0.0625362	-0.0119466	0
121.8	0.00227964	-0.0323675	-0.0195214	0.0173731	0.0554606	-0.0252729	0.0276464	0.044191	0.0515744	-0.023713	0
122	0.0136107	-0.00687014	0.0193457	-0.00694949	-0.000431136	-0.0213154	0.0762972	0.0712101	0.016634	-0.0322578	0
122.2	0.00783552	-0.0159367	0.00621234	0.00935789	-0.00393615	-0.0324204	0.0252106	0.0897486	0.0765483	-0.0106184	0
122.4	0.0127271	0.0422466	-0.00609269	0.0263047	0.0312802	-0.0125862	-0.00503298	0.0355839	0.0997637	-0.00187736	0
122.6	-0.00359821	0.0489847	0.00497557	-0.0389103	0.0197705	-0.0139189	0.00541999	0.0039725	0.0214785	-0.000873947	0
122.8	-0.00535495	0.0121679	0.00919663	-0.0292996	0.0168628	-0.0274047	0.00885105	-0.00788645	0.0331596	0.011075	0
123	0.000922754	0.0295693	0.0241346	0.0764654	0.0323827	-0.00147284	0.0124799	0.0049342	0.113247	0.024576	1
123.2	0.000846717	0.0663208	0.0442408	0.0853051	0.00638389	0.0334856	0.0442139	0.0748707	0.0783021	0.00785251	1
123.4	0.0593766	0.0467387	0.011686	0.0355762	-0.00226049	0.0173124	0.065104	0.0851961	0.057293	-0.039824	1
123.6	0.0164742	0.0113296	0.0844585	0.0419089	-0.015733	0.0037816	0.0536166	0.0400869	0.0450733	-0.0369675	1
123.8	0.0317491	-0.01238	0.0922749	0.0671903	-0.0226576	-0.00436588	0.0697041	0.0774358	0.0422639	-0.000479063	1
124	0.0676001	-0.00236222	0.0437313	-0.00439139	0.0109278	-0.0195927	0.0571514	0.125362	0.0363833	-6.72218e-05	1
124.2	0.0569507	0.0236238	0.0249671	-0.0225743	0.0131567	-0.0201268	0.0480268	0.104511	0.0467407	-0.0145058	1
124.4	0.0461651	0.0587634	0.0731814	0.0590986	-0.0204421	-0.0101631	0.0449545	0.0899122	0.0626972	-0.00910418	1
124.6	0.0419014	0.0981071	0.130341	0.0519035	0.00761079	-0.0225387	-0.0191441	0.12854	0.0457532	-0.0298987	1
124.8	-0.00463924	0.0601043	0.0408184	0.0689589	0.0093984	-0.0280702	0.00129523	0.11029	0.0463641	-0.0653809	1
125	-0.0144881	-0.00820082	0.0189056	0.0135913	-0.0473825	-0.0299893	0.0539943	0.0858427	0.042317	0.000767948	1
125.2	0.0135898	-0.0182869	0.056866	-0.0458362	-0.0486247	-0.0319138	0.0256498	0.112234	0.0407387	0.0145504	1
125.4	0.00867414	-0.0232776	0.0545568	-0.0651451	-0.0520044	-0.0119646	0.00597977	0.0846165	0.0540103	-0.0254282	1
125.6	-0.00991169	0.0307962	0.0361563	-0.0524324	-0.0589329	-0.00663531	0.0154649	0.0397561	0.0542869	-0.0194103	1
125.8	0.0107995	0.103186	0.0476685	-0.010729	-0.0248345	-0.0363208	0.0267267	0.0719957	0.0342439	0.0089896	1
126	0.0196034	-0.00988908	0.0398955	0.0173616	-0.0313747	-0.0376616	0.0700234	0.0789315	0.0370015	-0.00766208	0
126.2	-0.00903985	-0.00027471	0.0340018	-0.0213338	-0.00783843	-0.0369787	-0.0517387	0.0890462	0.0364903	-0.0196006	0
126.4	-0.0270589	-0.00456851	0.0395745	0.00352296	-0.0249776	-0.00782483	-0.029166	0.138496	0.000495766	-0.0273353	0
126.6	-0.0216318	-0.0301772	0.0107722	-0.0327146	-0.0456192	0.0129292	0.070082	0.125296	-0.00387746	0.0106653	0
126.8	-0.0101038	0.0101502	-0.015395	-0.0141824	-0.0375735	0.00437617	0.0641352	0.107441	0.0198554	0.013443	0
127	0.00309738	0.037579	0.0267371	0.0424308	-0.018185	-0.0260879	0.0473781	0.114844	0.0437439	-0.0350225	0
127.2	0.0118655	-0.0207059	0.0622618	-0.025464	-0.0100386	-0.0444191	0.119525	0.091435	0.0594768	-0.0184	0
127.4	-0.00684519	0.00744618	-0.00448492	0.0147258	-0.0180176	-0.00995839	0.0898229	0.111425	0.0349865	0.0261605	0
127.6	-0.0191286	0.0930841	0.0394033	-0.0121437	0.019672	-0.0280152	0.00555007	0.0474941	0.0657955	-0.00810127	0
127.8	-0.00509817	0.0449526	0.0394056	0.00985408	-0.00644126	-0.0452267	0.0210134	0.0835063	0.0464189	-0.0154363	0
128	0.000707869	-0.0308462	0.0033202	0.0610378	-0.0449092	0.0212627	0.0572672	0.0897051	0.0380537	-0.0381092	0
128.2	-0.0114649	-0.0101491	0.0189522	0.0307203	-0.0542385	0.039304	0.0287706	0.0991277	0.0283087	-0.0378791	0
128.4	-0.0122556	0.0192353	0.0688278	-0.0234509	-0.0404412	-0.0273837	0.0167927	0.136014	-0.00167409	0.00978684	0
128.6	0.00788327	-0.00459569	0.0744354	-0.00147318	0.00275056	-0.00202719	0.0441109	0.031886	0.0317194	-0.0124869	0
128.8	0.0241307	0.0287844	-0.00135223	-0.0114428	-0.013888	0.0163158	-0.0244902	0.0493412	0.0149499	-0.0150426	0
129	0.00950987	-0.0215044	0.0251865	0.0143986	0.00219839	0.00117913	0.0292637	0.00812318	0.0180437	0.020972	0
129.2	-0.0272822	-0.0480536	0.0217993	0.0496224	0.0105787	-0.0179058	-0.020598	-0.000429304	-0.0378161	0.00228928	0
129.4	-0.0095997	-0.030468	-0.0294131	0.0506332	-0.0085302	-0.00316753	-0.0270977	0.0200747	-0.0466529	-0.0243489	0
129.6	0.00806928	0.00198672	-0.0394697	0.0554841	-0.0118185	0.0216147	0.0460116	0.00233837	0.007385	-0.0104628	0
129.8	-0.0237755	0.0376217	-0.0281663	0.0570605	0.00407799	0.0197378	0.0156874	-0.0219171	-0.00529596	0.00468333	0
130	0.0127569	0.00342772	-0.0370932	-0.0135539	-0.00960829	0.0224997	0.03778	-0.0336937	-0.0292809	0.0108593	0
130.2	0.00617336	-0.0314976	-0.0140226	-0.0196076	-0.0359975	0.0378151	0.0397388	-0.0385115	-0.0185096	-0.00509222	0
130.4	-0.0184714	0.0397766	-0.0487714	-0.00503366	0.0113823	0.0365642	-0.0377295	-0.0158083	0.00545478	0.0118083	0
130.6	-0.025128	0.0253539	-0.0355011	-0.00544589	-0.00365527	0.0152362	-0.0263059	-0.041997	-0.0189917	0.0141046	0
130.8	-0.0185123	-0.0222184	0.00357912	-0.0320087	-0.0298673	-0.0199284	-0.0364845	-0.0660055	-0.0527785	0.00460227	0
131	0.0074212	-0.00471362	0.0102801	-0.0214219	-0.00169592	-0.0389679	-0.0706619	-0.0348403	-0.0220129	0.00258026	0
131.2	0.0376451	-0.0183054	0.034708	0.0268038	-0.00566397	-0.0253515	0.0234942	-0.0408061	0.028866	-0.00961826	0
131.4	0.00671574	-0.00492053	0.0223934	-0.0448688	0.0196088	-0.0193867	-0.0350324	-0.0826166	0.00488621	0.00720812	0
131.6	-0.0113964	-0.00331504	-0.00631831	-0.0256876	0.014952	0.0118221	-0.0760798	-0.0088126	-0.0129629	0.0244469	0
131.8	-0.00052898	0.0194377	-0.02079	-0.0105944	0.00385359	-0.0163434	-0.0693008	0.0165347	-0.000143575	0.00462599	0
132	0.0065063	0.00529985	-0.0316647	-0.0239715	-0.00328381	-0.0220007	-0.00913917	-0.0385075	-0.00376499	0.0064383	0
132.2	0.000643329	-0.0149333	0.0270846	-0.0261264	-0.00387806	0.0222748	0.0454168	-0.021307	-0.00832749	0.0180844	0
132.4	-0.0121299	-0.0169575	0.0615842	-0.0162463	-0.00442137	0.0311754	0.0463354	0.0351961	0.000810533	-0.0260969	0
132.6	-0.0250495	-0.0588635	-0.0525002	-0.0065823	-0.0105045	0.00243371	0.0419314	-0.0175309	-0.0033516	-0.0567606	0
132.8	-0.00174444	-0.00220501	0.0434646	-0.0357738	0.0256417	-0.0183308	0.0124875	0.0178708	0.0407074	0.0276119	0
133	0.0157128	0.00414726	-0.0235075	-0.036481	0.0232659	0.00433595	0.0220414	0.0274424	0.0100632	0.028204	0
133.2	-0.0164975	0.0169083	-0.0305353	0.0131248	-0.0105852	-0.0299089	0.0137589	-0.0105285	-0.0223203	-0.0202286	0
133.4	-0.0288488	0.00776493	0.0135569	0.0382266	-0.00205438	-0.0399856	-0.0191432	-0.0144002	-0.0191598	-0.00588538	0
133.6	-0.00689862	-0.0365984	-0.0228786	-0.0021242	0.00648007	-0.00388676	-0.0149002	0.0202521	-0.0080664	0.0239248	0
133.8	-0.00128603	-0.0292883	-0.046248	-0.0192517	-0.0109948	-0.0211949	-0.00239225	0.0283624	0.00414766	-0.0032958	0
134	0.0191526	-0.00643678	-0.0454192	0.0481168	0.0407614	-0.0272175	-0.0500705	0.00812454	0.00519454	-0.0166477	0
134.2	0.016292	-0.0195821	-0.0152874	0.0386738	-0.0060756	-0.00965051	-0.0175721	-0.00875279	0.0125412	-0.0207242	0
134.4	0.0132444	0.032784	0.0144179	0.0365101	4.03555e-06	0.0127799	-0.00459067	0.00337628	0.0340346	-0.0109815	0
134.6	0.0296528	0.0591533	0.0329366	-0.0229298	0.00947649	0.00135603	-0.00332349	0.0405582	0.0131304	-0.0107337	0
134.8	0.00552033	0.0331401	0.0399968	-0.0543179	0.00697942	-0.0279883	0.00225338	0.0158555	-0.0116815	-0.00270682	0
135	-0.0260005	0.00730497	0.0354189	0.0034587	0.00676656	-0.0258003	0.0379051	-0.0182449	0.00828585	0.0159586	0
135.2	0.0118329	-0.0107427	0.0191525	0.0122597	-0.0328203	-0.00431203	0.08768	0.059771	0.019099	-0.00131715	0
135.4	-0.00312383	0.0108983	-0.0111031	0.00320284	-0.0106839	-0.016486	-0.000446159	0.0737051	0.0064728	-0.0310416	0
135.6	0.0135864	-0.0317394	-0.0277041	-0.035234	0.013746	0.00434253	0.0212933	0.00740533	0.0135028	-0.0115115	0
135.8	0.00454532	0.00955736	0.0220962	0.0207417	0.000996207	0.0375404	0.0483375	-0.0445248	0.00708387	0.0109085	0
136	0.00870807	0.0152209	-0.0200351	0.0227794	0.00023477	0.0589812	-0.0148214	-0.0183682	-0.0086604	0.0127395	0
136.2	0.0235282	-0.00766625	-0.0248734	0.0109124	-0.00430178	0.0264073	-0.0236405	0.00747784	0.00444671	0.00598816	0
136.4	-0.0156827	0.0310966	0.0717099	0.0612128	-0.0245781	-0.0276524	0.0300499	-0.0130153	0.021372	0.00618026	0
136.6	-0.0399801	-0.0141039	-0.0280344	-0.016886	0.00786954	0.00646221	-0.0374779	0.00130269	-0.00771899	0.00203513	0
136.8	0.0225655	-0.0219635	-0.00872433	0.00694939	0.0154088	0.0286931	-0.0194295	-0.0027037	-0.020825	-0.0439394	0
137	0.0191703	0.0118613	0.00869486	0.0553484	-0.000292586	-0.0214512	0.0141208	0.0225872	-0.0357365	0.0214963	0
137.2	0.00576996	0.022384	0.0560351	0.00667987	0.00419136	0.0140557	0.00146909	0.00361364	-0.00795903	0.03289	0
137.4	0.000744328	-0.00141624	0.0487139	-0.0218592	0.00749479	0.0402183	-0.00125299	-0.0245981	0.0105892	-0.00187509	0
137.6	-0.028098	-0.0108708	0.00747556	0.00866869	-0.00688572	0.00675679	-0.0123021	0.0226207	-0.00145878	0.0179652	0
137.8	-0.0393642	0.0159909	0.0298634	-0.00496471	-0.00236193	0.0198804	-0.0433095	0.0426349	0.00400442	0.0341709	0
138	-0.00728248	0.0377889	-0.0446976	-0.0128576	0.00956053	-0.011732	0.0245203	-0.0574731	-0.00867573	0.0177491	0
138.2	0.0143697	0.0321181	-0.0228931	-0.0521848	-0.0383285	0.0145882	0.00905988	0.0323268	0.0109785	-0.000619173	0
138.4	-0.0272205	-0.0280529	-0.0253032	-0.0239297	-0.0364099	0.0170387	-0.0193686	0.0276051	0.00414406	-0.0097586	0
138.6	-0.0114468	-0.0517051	-0.0334686	-0.0291839	-0.0037355	0.0159113	-0.018971	-0.030488	0.0244743	-0.00244122	0
138.8	0.0111528	-0.0453698	-0.0337764	-0.0544435	0.0162863	-0.00205312	-0.001459	-0.0559457	0.0229289	-0.00267914	0
139	-0.0235484	-0.0262238	-0.0322169	-0.0167972	0.0144248	-0.0462329	0.00235213	-0.0732655	-0.0171238	-0.0207733	0
139.2	0.0041113	0.0253747	-0.00551396	0.00239015	-0.00579464	-0.0333823	-0.0336646	-0.040438	0.00985601	-0.0137367	0
139.4	0.0300384	-0.0217121	-0.049665	-0.00626713	0.0208319	-0.00218924	-0.0420866	-0.0115157	-0.00916892	0.0221651	0
139.6	-0.0139835	0.0215397	0.00774205	0.0436784	0.0230363	-0.0242823	0.00367302	0.0129523	-0.0580263	0.000320644	0
139.8	0.00127063	0.0151713	0.0168309	0.023233	0.0172531	-0.0245132	-0.0409119	-0.00530447	-0.0364647	0.000586495	0
140	0.0268842	-0.0540378	0.0210168	-0.0136868	-0.00383279	-0.00333442	-0.0624705	-0.0236347	-0.0153368	0.0175512	0
140.2	-0.00970325	-0.0651596	0.0356215	-0.0193564	-0.0133606	-0.0154685	-0.0242238	-0.0322196	-0.0305135	0.00669524	0
140.4	-0.0203755	-0.0105233	-0.00281483	-0.0222506	0.00850025	-0.0424168	-0.0153467	-0.0426892	-0.0131772	0.000192164	0
140.6	0.0320167	0.0317273	0.0130546	0.0207357	0.00278976	-0.0316294	0.0328196	0.00257225	0.0189351	0.0185266	0
140.8	0.0106073	0.0375809	0.00760748	-0.00282637	0.013655	-0.0111994	0.0422331	0.0454168	0.0267331	0.00563895	0
141	-0.00845569	0.0210157	-0.0131015	-0.00188231	-0.0107725	-0.00298597	0.0545401	0.0287697	0.0200618	-0.0175438	0
141.2	-0.024701	0.0143566	0.000990553	0.0142121	-0.0295846	0.0169316	0.081174	0.0221426	0.0211854	-0.00819107	0
141.4	-0.0175305	0.0193723	0.0267783	-4.40198e-05	-0.0142575	0.0288481	0.0413442	0.0337442	-0.0185656	-0.00732096	0
141.6	0.00861071	0.00414647	0.0274215	-0.028636	-0.0128367	0.000920998	-0.0225597	0.0197568	-0.0440884	-0.0234073	0
141.8	0.00501646	-0.0314041	0.0140849	-0.0207871	-0.0219589	-0.0304864	0.00235623	0.0137347	0.0165802	-0.0239415	0
142	0.0176058	-0.0370826	-0.0118616	0.0242179	0.0301188	-0.00566273	0.0154406	0.0468992	0.012502	-0.052073	0
142.2	0.0328866	-0.0324752	-0.0481917	0.0051892	0.023269	0.0372292	-0.018761	-0.00547002	0.011389	-0.0251959	0
142.4	-0.0038489	-0.0335626	-0.0546501	0.0234517	0.0120196	0.0125401	-0.00269713	-0.0333964	0.0162129	0.0292512	0
142.6	0.0159192	-0.0210307	0.00293856	0.0323885	0.0119607	0.0110511	0.0104536	0.029663	0.0211673	0.0165637	0
142.8	0.0349696	-3.28509e-05	0.0350288	0.0192281	0.00951931	0.0319883	0.0316692	0.0428766	0.0153205	-0.035977	0
143	-0.0202445	0.0339855	-0.010094	0.0188671	0.00998401	0.0135179	0.0525457	-0.0202751	0.00414524	-0.0286171	0
143.2	-0.0134968	0.082827	-0.0141991	-0.00258207	-0.00090348	0.0154788	-0.0221442	-0.0189305	0.0156906	0.0343909	0
143.4	0.01009	0.0561878	0.0452498	0.0134784	-0.0263292	0.0304697	-0.0295033	-0.0508465	0.0186747	0.0665975	0
143.6	0.0125228	0.0281272	0.0198746	0.0174775	-0.0117349	0.0377618	-0.0132979	0.0327744	-0.0111468	0.0375181	0
143.8	0.00135746	-0.0132652	-0.0212746	0.00868161	-0.0257904	0.000125524	-0.00604263	0.0247359	-0.0150922	0.0084678	0
144	-0.0118097	0.00334841	-0.00387838	-0.0335824	-0.0217842	0.0102756	0.00965103	-0.00997059	0.00156008	-0.0145114	0
144.2	-0.021746	0.0527184	0.0137974	-0.0590632	0.006837	0.0542533	-0.00739169	0.0115823	0.00380139	0.0012421	0
144.4	-0.0299862	0.0051423	0.00453418	-0.00695005	-0.0146442	0.0257083	-0.0584064	-0.00610808	-0.0141317	0.0443455	0
144.6	-0.032758	-0.0653598	0.0167462	0.0282858	-0.026012	-0.00874098	-0.0395025	-0.0150582	-0.0440189	-0.002117	0
144.8	-0.00246324	-0.0122525	-0.0532689	-0.00364904	0.0225307	-0.0198888	-0.0273386	-0.0374092	-0.0320382	-0.0117156	0
145	-0.00241047	-0.0228475	-0.0257353	-0.0206676	0.0435237	-0.0453574	0.017193	-0.0247192	-0.00496443	-0.00999177	0
145.2	0.000508504	-0.0240032	0.00961119	-0.0184419	0.0196336	-0.0378738	0.0084935	-0.0319877	-0.0175455	-0.0085564	0
145.4	0.0186526	-0.0132404	-0.0341207	0.0237435	0.0119441	-0.0131788	-0.0217161	-0.0396322	-0.01831	-0.0138938	0
145.6	0.0120655	-0.0263368	-0.0194403	0.0487184	0.0187963	-0.0124162	-0.0179796	-0.0279762	0.00888917	0.000672116	0
145.8	-1.1489e-05	0.000273291	0.0716553	-0.0260505	0.000528361	-0.0100252	-0.0370906	-0.0272311	-0.00809419	0.0370449	0
146	0.0314118	-0.00688858	-0.00435166	-0.0504198	0.00552471	-0.0081934	-0.0222294	0.0237392	-0.0210035	-0.00514042	0
146.2	0.00967348	-0.00481643	-0.0254407	-0.012875	-0.0026791	-0.020475	0.0745689	0.00737427	0.0219926	-0.0068655	0
146.4	-0.00360516	-0.00595486	-0.0073153	-0.0383765	-0.00551971	6.56506e-05	0.00839353	-0.0250394	0.011547	-0.0141536	0
146.6	-0.0228823	-0.000917379	0.0108219	-0.0281624	-0.00901225	0.00240187	-0.0341841	0.0382454	-0.0328899	-0.0201524	0
146.8	-0.0435093	0.00611031	0.031964	0.0206015	-0.0201374	-0.00504399	-0.00198485	0.0581201	-0.0299406	-0.0269857	0
147	-0.0117291	-0.00618499	0.041209	0.00581087	-0.0133443	0.00456936	-0.0433863	-0.0309466	0.0175137	-0.0201369	0
147.2	0.0251742	-0.0119928	0.012082	0.00092863	0.00604101	-0.024897	-0.0370834	-0.00514563	0.0487765	0.0300179	0
147.4	-0.00386274	0.0226836	-0.0509003	0.0350081	-0.0161309	-0.0288611	0.0181694	0.0359882	0.030312	-0.0250985	0
147.6	0.0126142	0.0469667	0.000617621	0.0139053	0.000707362	-0.0302185	0.026402	-0.00205643	0.0198563	0.010238	0
147.8	0.0307022	0.0172577	0.00235697	-0.0244584	0.0168834	-0.0168611	-0.00829542	0.0224391	0.0133402	0.00559505	0
148	0.00281331	-0.00137516	-0.014378	0.00442157	0.0162288	0.00269592	0.0516161	0.00285403	0.0272176	-0.00924682	0
148.2	-0.0204728	0.00366699	0.0305743	0.049838	0.0129504	0.00874027	0.103839	-0.0401762	0.0194646	0.0176867	0
148.4	-0.00029887	-0.00599966	0.0295872	0.0136775	0.000244674	0.00482331	0.0188485	0.0372219	-0.0118896	-0.00125498	0
148.6	0.0132295	0.00845352	-0.0249826	-0.0494856	-0.00742694	-0.00375601	0.0311787	0.0166598	0.0492524	-0.00402894	0
148.8	-0.00619015	-0.0203129	-0.0133624	-0.0550937	-0.0145208	-0.00523192	0.0205679	-0.0186989	0.0178393	0.0155314	0
149	-0.0176163	0.0296929	-0.0286031	0.0167883	-0.0405828	0.00066497	-0.0125726	0.0292152	-0.00721506	-0.00869698	0
149.2	0.00420793	-0.0251392	-0.0422806	0.0295396	-0.0233543	-0.00623485	-0.00727397	0.0356813	-0.0107647	-0.0430416	0
149.4	0.00289076	-0.0708403	-0.0194783	0.0283794	0.00501664	-0.0294346	0.0207065	-0.00537033	-0.0137291	-0.0150452	0
149.6	-0.0224715	0.0287071	-0.00190972	0.0555171	-0.00788751	-0.0314228	-0.0262831	0.0152876	-0.00822032	0.010653	0
149.8	-0.00242535	0.0500302	-0.00959823	-0.00532023	-0.00651745	-0.0105752	-0.0928821	0.0530548	0.000122455	-0.0277719	0
150	0.006788	0.0318881	-0.00945079	-0.0451473	0.0200412	-0.030493	0.0449889	0.00856381	0.0131593	0.0173021	0
150.2	-0.00705237	0.0139669	0.0461149	0.0148792	0.0246646	0.00943759	0.0435687	-0.00108416	-0.0287295	-0.00491497	0
150.4	-0.00393926	-0.0295517	0.0500884	0.0437936	0.0259569	0.0114376	-0.0243753	-0.0253943	-0.0476686	0.00469636	0
150.6	0.0272504	-0.00586227	0.0238825	0.0296537	0.0185941	0.0187682	0.0043057	-0.0364789	-0.0238557	0.013017	0
150.8	0.0250256	0.0320364	0.0122865	0.0151876	-0.00715664	0.035968	0.0528298	-0.0236964	-0.0121899	-0.00562362	0
151	-0.00330619	-0.0270634	-0.00790194	-0.0195465	-0.00334012	0.0260718	0.0151396	-0.00198077	-0.00469479	0.00726438	0
151.2	0.0274863	-0.0477583	-0.00710574	-0.0545878	0.0374169	0.0695065	-0.031744	0.0412908	0.0246197	0.0177558	0
151.4	0.0191313	0.0259212	0.0429143	-0.0199863	-0.0133108	0.0668179	-0.0533441	-0.0392351	-0.0223418	0.0300969	0
151.6	0.0257806	0.0140154	0.000685341	-0.00874625	-0.0111629	0.0338565	-0.0399804	-0.0408372	0.0146358	0.00141777	0
151.8	0.00150115	0.00480151	-0.0433563	0.0403772	0.0221878	0.0198866	0.0060553	0.018582	0.0225618	-0.011124	0
152	-0.0146252	0.00593431	-0.0110669	0.029237	0.00475579	0.0179642	0.0329295	0.0287224	0.0269435	0.0146649	0
152.2	0.0105001	-0.0159715	0.0114698	-0.0181119	-0.0301336	0.0323814	-0.00964069	0.0378355	0.0524265	0.0215871	0
152.4	0.00832607	-0.0120978	-0.0226799	0.0230428	-0.0319347	0.0505148	-0.0582312	0.0793074	0.010553	-0.000534665	0
152.6	-0.017544	-0.016008	-0.00759736	-0.0308174	-0.0364142	0.00294374	-0.0155884	0.0130822	-0.00243381	0.00436557	0
152.8	-0.0292	0.00903978	0.023134	-0.0155379	-0.00359806	0.00430336	-0.0168168	-0.0353392	-0.0369014	-0.0227109	0
153	-0.0115037	0.00364124	-0.00774962	0.00570255	-0.0524664	-0.00584343	0.0445933	0.00483276	-0.0200724	-0.0122115	0
153.2	-0.0155345	-0.0215295	-0.0251262	0.0182291	-0.0371678	-0.0324502	0.0328511	-0.0121957	0.0156609	-0.00624931	0
153.4	-0.0312843	0.0077599	-0.00132127	-0.00924409	0.0248548	-0.0354309	-0.0323362	-0.0719268	-0.00168104	-0.000862239	0
153.6	-0.0357378	0.0620437	-0.00332847	-0.05204	0.0213025	-0.0344028	-0.0100738	-0.0601883	-0.0422026	0.0257694	0
153.8	-0.0335002	0.0327849	-0.0256284	-0.0172271	0.0327368	-0.0472872	0.00855867	-0.0342464	-0.0356828	0.0127478	0
154	0.0333439	-0.0275372	-0.0124368	-0.0130092	0.013902	-0.0226054	-0.0190598	-0.0395502	-0.0164187	-0.00267112	0
154.2	0.0136793	-0.0176836	-0.0402454	0.0242627	0.0140235	-0.0414272	0.00881655	-0.0328848	-0.0388431	-0.0089308	0
154.4	-0.0297121	0.00377589	0.00520829	0.0058506	0.0103374	-0.0202062	-0.00153395	0.00917678	-0.00349035	0.000690534	0
154.6	-0.003389	-0.0165191	0.0185087	-0.0207684	0.014744	-0.0126099	0.0132107	0.00813412	0.0119938	-0.00156519	0
154.8	0.0193463	-0.0354171	-0.0265552	-0.028699	0.0258918	-0.0317872	0.0350966	-0.0346803	-0.0076011	0.00430967	0
155	-0.0107507	-0.0324831	0.0274854	-0.0282715	0.00972662	-0.023859	-0.0445025	-0.023184	0.00862055	0.0296276	0
155.2	0.010794	-0.0511301	0.0852983	0.041585	-0.00433192	-0.0461382	-0.0847122	0.015988	-0.0145996	0.0101398	0
155.4	0.0151826	-0.020688	-0.0485102	-5.02059e-06	0.0262532	-0.0138743	-0.00578181	-0.0256823	-0.00482572	0.00175562	0
155.6	-0.00438145	0.0353543	-0.0361715	0.0126629	0.0300572	-0.0293606	0.00767048	-0.02266	0.00314675	-0.00568448	0
155.8	0.000426431	0.0212815	-0.0201575	-0.0127971	-0.00481122	-0.0270637	-0.000917211	-0.012325	0.0105484	-0.0127944	0
156	0.00960026	0.0108758	0.00358929	0.00162669	-0.0093833	0.0196123	-0.00528067	-0.0107555	0.00288804	-0.00758203	0
156.2	-0.00713211	0.0348735	0.0540224	0.0563426	0.0206221	0.0388993	-0.0274683	-0.0127394	0.00845405	0.000401059	0
156.4	-0.00912854	0.00653929	-0.0210857	-0.00142851	0.00257641	0.0185565	-0.0234593	-0.00945847	0.0451345	-0.00733206	0
156.6	0.0264618	0.00812485	-0.0263656	0.0353219	-0.0552905	0.0151535	-0.00561766	0.0742968	0.016917	-0.0248879	0
156.8	0.0345248	0.0277415	-0.0071758	0.0149094	-0.0372354	0.0432557	0.00519206	0.0197618	0.0540325	-0.039685	0
157	0.0307578	0.0545282	0.043985	0.000394314	-0.0221511	0.00880067	0.0721864	0.0561941	0.00958983	-0.0172805	0
157.2	0.018052	-0.0051492	0.0332913	0.0178631	-0.00999873	-0.0106183	0.0773918	0.087586	-0.0319828	-0.00447472	0
157.4	-0.00847124	-0.0200224	-0.00179664	-0.000290086	-0.00695738	0.00168239	0.0458049	0.0130611	-0.0137487	-0.00959532	0
157.6	-0.0289725	0.0391239	0.034481	-0.0274298	-0.00202292	-0.00519773	0.0222838	-0.0202813	-0.00896877	-0.0131603	0
157.8	-0.0227761	-0.052843	0.0664703	0.00566623	0.0501629	0.0125615	-0.0548707	0.0217722	0.00204515	-0.0193968	0
158	0.00239246	-0.0473252	0.0581738	-0.0242368	0.0112712	0.0199133	0.0377626	0.00878974	0.00960091	0.0262897	0
158.2	0.00882271	0.019912	-0.00223557	-0.0648857	-0.0168072	0.0166251	-0.0193871	0.0107008	0.00396846	0.00147716	0
158.4	-0.0255693	0.0321485	-0.0325331	-0.0114566	0.00590769	0.0260813	0.0172443	0.0343655	-0.00289974	-0.00856008	0
158.6	-0.00761225	0.0255772	-0.046723	0.0264765	0.0134786	0.0411363	0.0491598	0.0252857	-0.0152279	0.00784594	0
158.8	0.0210277	0.026849	-0.0251189	0.00250563	0.00155144	0.0358837	-0.021103	-0.0100213	-0.0143981	0.0165474	0
159	-0.0141269	4.22641e-05	0.0224618	0.0156896	0.0114458	0.0197176	-0.00596414	0.00420844	0.0227099	0.0309229	0
159.2	0.0153658	-0.00440168	-0.031225	0.0261748	0.00213123	0.0219453	0.00307006	0.053848	0.0394623	0.0210855	0
159.4	-0.014641	0.0197919	0.0157594	-0.00268492	-0.0242773	0.00338405	-0.009995	-0.0152216	-0.0126155	0.00515357	0
159.6	-0.0325637	-0.0184205	-0.00195667	0.0133844	-0.0230479	-0.0224977	-0.0388112	0.00750381	0.0252255	0.0109214	0
159.8	0.019206	0.00747835	-0.00566638	0.029736	-0.00662578	-0.0194373	0.00297033	0.0137221	0.0185175	0.00287107	0
160	0.0466821	0.0159597	-0.0083792	0.0189372	-0.0112678	0.0128871	0.0491878	-0.0342776	-0.0310339	0.00889174	0
160.2	0.021063	-0.0489684	-0.0485309	-0.01637	-0.0238089	0.0266344	0.0217661	-0.0415859	-0.0282304	0.0184771	0
160.4	0.0206135	-0.0204904	-0.0160851	-0.0510789	-0.0101411	-0.00170667	-0.00960346	-0.0212291	-0.0165935	-0.0118497	0
160.6	-0.00808336	-0.00703809	0.00323093	0.0157101	0.00719968	-0.0100566	-0.0225438	0.0138078	0.0286474	0.0213186	0
160.8	-0.0232083	-0.0511101	-0.0194739	0.00907477	0.017228	0.0165083	0.0196307	-0.0441887	-0.0171147	0.00560349	0
161	-0.00334502	-0.039419	-0.0330115	-0.0219153	0.00957519	-0.0138174	-0.0194333	-0.051147	-0.0435963	-0.0200593	0
161.2	-0.0060938	0.0113484	-0.0297476	-0.0146264	-0.0122411	-0.0391658	-0.0247141	-0.042652	-0.0214291	-0.020276	0
161.4	-0.020421	0.0193943	-0.0413376	0.00516602	-0.0272779	-0.0219445	0.0152734	-0.0361251	-0.0140269	-0.00467295	0
161.6	0.000150894	-0.0120786	-0.019661	0.00388994	-0.00868468	-0.00366963	-0.0287772	-0.00753361	-0.0134944	0.0104912	0
161.8	0.00733654	-0.0161337	0.0625699	-0.0197577	0.0287789	0.00984966	-0.0822804	-0.0391322	0.00736916	-0.00234947	0
162	-0.0204282	0.0266622	0.0146694	-0.0441245	0.0157389	-0.0404568	-0.079948	-0.0206364	-0.0269921	-0.0350958	0
162.2	-0.0220373	-0.0098855	0.0315412	0.0158283	0.0198196	-0.0517632	0.00513928	0.0121336	-0.0241713	0.00767148	0
162.4	0.00586829	-0.0152593	0.0174616	0.0151667	0.0263802	-0.0363467	0.0391596	0.0211969	0.03552	0.0258679	0
162.6	0.0121221	0.0351587	-0.0142957	-0.0121792	0.0229326	-0.00788706	-0.00767381	0.00834684	0.0583495	-0.000494924	0
162.8	-0.00857074	0.0401781	0.00136203	-0.00345861	0.00602195	0.00027885	0.0033657	-0.00997828	0.0235872	-0.00451962	0
163	-0.00850121	-0.00299786	0.0116178	-0.00969036	-0.0109633	-0.0204358	0.0746422	0.000173726	0.00127915	0.0126429	0
163.2	0.0138183	0.00649813	0.029906	0.016026	0.016854	0.0137824	0.0129647	0.0465482	0.0041081	0.0136728	0
163.4	0.00497607	0.0626406	0.00523071	0.0046026	-0.000606891	-0.0153892	-0.0162676	0.0247241	0.0408211	-0.0155458	0
163.6	-0.0297464	-0.00421682	0.00253311	0.0224059	0.00504469	0.00193928	0.0399709	0.0334589	0.00941673	-0.0370268	0
163.8	0.0250239	-0.0293144	0.00772846	0.0331203	0.00606616	0.0214749	0.0592045	0.0141706	0.000440729	-0.0206905	0
164	0.0415825	-0.0479725	0.01145	0.00890644	-0.0183338	-0.000263706	0.0222024	0.0396996	0.0204978	-0.00298293	0
164.2	-0.00911193	-0.0884551	0.00485455	0.00559695	-0.0227946	-0.0163434	-0.0138297	0.0846633	0.0149502	-0.0140074	0
164.4	0.0476252	0.00518648	-0.00648333	0.0350182	0.00340714	-0.0174936	-0.0481327	-0.0167834	0.0147306	-0.0182108	0
164.6	-0.0114974	-0.022167	0.0600245	0.0240135	0.0161915	-0.0132054	-0.0455956	0.00909719	-0.0327327	0.001716	0
164.8	-0.0260355	0.0487562	-0.0260396	-0.00670104	-0.0345867	0.00113018	-0.0351691	0.0156445	-0.032676	0.0140162	0
165	-0.0211107	0.00414774	-0.0448806	0.00276101	-0.0195917	0.000755616	-0.0104759	-0.0138454	-0.0102165	-0.0292164	0
165.2	-0.0307191	-0.0306906	-0.000634435	0.00126658	0.00750064	0.0386423	0.0507687	-0.0252646	0.00175904	-0.00848407	0
165.4	-0.0213782	0.0228365	0.015674	-0.0328702	-0.00405463	0.0645651	0.0805501	-0.00691026	-0.0137816	0.0439249	0
165.6	0.00179446	0.024319	0.0247503	-0.0517078	-0.0102138	0.0275783	0.0209019	0.0160897	-0.0370022	0.0135336	0
165.8	0.00458073	0.0477196	-0.00929385	-0.0467594	-0.0287906	0.0409101	-0.0264552	0.00989421	-0.022498	0.0126118	0
166	0.0176976	0.0289033	-0.0137755	-0.00990964	0.0070725	0.0304753	0.00262066	-0.0263921	-0.0408909	0.0268744	0
166.2	0.0126486	0.0157067	-0.0592545	-0.0359789	0.0456935	0.0103727	-0.0383041	-0.0387523	-0.0264541	0.0118518	0
166.4	0.0107914	0.0198766	-0.0591035	-0.0049948	0.00293219	-0.00637407	-0.00239089	-0.0272839	-0.000962523	0.0159025	0
166.6	0.0174886	-0.0179651	0.0264286	0.0437007	-0.0301513	-0.00826466	0.0309427	-0.0332474	0.0209105	-0.0034628	0
166.8	0.00639732	-0.0308432	0.0516642	0.0334205	0.0105807	-0.0134584	-0.014538	-0.0465641	0.019707	-0.0168514	0
167	-0.00412719	0.0459497	-0.0320407	0.0166725	0.0314201	-0.0292565	0.00558702	-0.0298137	-0.00530246	0.0360314	0
167.2	0.026108	0.032891	-0.0118177	-0.0303765	0.0140911	-0.0058939	0.0070212	-0.0145627	0.0289187	-0.00700696	0
167.4	0.0118702	0.0102299	0.0521953	-0.0062389	0.0117236	-0.0200983	-0.0427475	-0.00740203	0.0111334	-0.0340262	0
167.6	-0.0106107	-0.00770786	0.0401526	0.0464962	0.00293504	-0.00564722	-0.0368486	0.0185446	-0.0192093	-0.0131884	0
167.8	-0.0221944	-0.033592	-0.0194548	0.0460088	-0.0178884	-0.00297405	-0.0212227	0.051496	0.0150921	0.00455487	0
168	-0.0282629	-0.0299126	0.0145354	0.00803118	-0.0445456	-0.00419989	-0.0120522	0.0441805	0.0415824	-0.00995422	0
168.2	-0.0276825	-0.00348827	0.0821232	-0.00596354	-0.037729	0.00610413	0.0402568	-0.00540367	0.00105644	-0.0371508	0
168.4	-0.0101517	-0.0153201	0.00575604	-0.0202226	0.0200259	-0.0359803	0.077247	-0.00649076	-0.0117966	-0.0318215	0
168.6	0.0347787	-0.0180124	-0.0244377	-0.0705505	0.0123538	-0.0370361	0.0328159	0.0794632	0.0164751	0.0227037	0
168.8	0.00600578	-0.0213132	-0.0366631	0.0364509	0.00529528	-0.00698472	0.0140466	0.0120258	0.0291787	0.00181468	0
169	-0.0358027	0.00884142	0.0177683	0.0266384	0.00240634	-0.00620132	-0.0147391	-0.00600664	0.00773462	-0.0176517	0
169.2	-0.00906478	0.0291005	0.00832112	-0.0510176	-0.00627777	0.0115748	0.000933871	0.0149271	0.0226367	0.0117805	0
169.4	0.0235487	0.00100431	-0.0500664	0.00476417	-0.00640299	0.0447738	0.0196846	0.00240933	0.039292	0.0227441	0
169.6	0.00775378	-0.0178317	-0.0158144	0.0614357	0.00573566	0.0405507	-0.0532586	0.0151403	-0.00537575	-0.00365605	0
169.8	0.0242075	0.000914433	-0.0176218	-0.0192204	0.0150516	0.0392871	-0.0712166	-0.000231493	-0.0145619	0.0123779	0
170	0.0153122	-0.0231633	-0.039107	0.0187383	0.0155713	0.00764742	0.000434019	0.0141113	-0.0204257	0.0480848	0
170.2	-0.000688543	0.0211243	0.0407986	0.0396314	0.0140671	-0.0136271	0.00966093	0.00170592	-0.0454499	0.014681	0
170.4	0.0139862	-0.0251235	0.0392439	-0.0129758	0.0047556	-0.0322809	-0.0304078	-0.0480765	-0.0584269	0.0043457	0
170.6	0.00782364	-0.0629293	-0.00808222	-0.0487827	0.00157936	-0.0125244	-0.0475989	-0.0517294	-0.0133966	0.0138919	0
170.8	-0.0175298	-0.00220246	-0.00936669	-0.0397778	0.00758233	0.00121008	-0.0640266	-0.00914416	0.017957	-0.017689	0
171	0.000898006	-0.0199344	-0.0399404	-0.0204088	0.00734241	-0.0491135	-0.0721607	-0.0230335	-0.0241153	-0.0348472	0
171.2	0.000907545	-0.0144774	0.0104568	0.0212265	0.00870865	-0.00388565	0.0289004	-0.0654728	0.00540451	-0.00151556	0
171.4	0.0245183	0.0268211	0.0355834	-0.0257599	-0.0182593	0.00563885	0.0617382	-0.0337294	0.00184305	0.0370769	0
171.6	0.00345305	0.0147873	0.0171589	-0.0375526	0.00422281	-0.00633779	0.058914	-0.0272886	-0.00276202	-0.00743662	0
171.8	-0.0129777	0.0501788	0.00842305	0.0090369	0.0289323	-0.00582379	0.0357447	-0.0139507	0.0120892	-0.027143	0
172	-0.00418665	0.0820994	0.0393449	0.0397103	0.00290317	-0.00110713	0.00941941	0.0208235	0.0251021	-0.013408	0
172.2	-0.0146312	-0.0155099	0.0472486	0.0559679	-0.0191963	0.00486966	0.0239984	0.0461519	0.0315499	-0.023269	0
172.4	-0.0217822	-0.0725079	-0.0168193	0.0654943	-0.00476298	0.00729186	0.030918	0.0810639	0.0235846	0.00975264	0
172.6	-0.0238436	0.0202967	-0.0152287	-0.0241574	-0.0142128	-0.0202192	-0.021454	0.0351979	-0.0119354	0.00373805	0
172.8	-0.00360018	-0.033698	0.00573031	-0.0237365	-0.00773014	-0.01833	0.0588517	0.0412771	0.0172967	0.00531695	0
173	0.0371412	-0.0136437	-0.0247468	0.0225219	-0.00125474	-0.00535018	0.0267568	0.0182751	0.0166788	0.00318444	0
173.2	0.016012	0.0359424	-0.0432953	0.0235167	-0.0161281	-0.0116212	-0.0352915	-0.0155704	-0.0216069	-0.0139701	0
173.4	-0.0259769	-0.0212838	-0.0168178	-0.0140429	-0.0197195	0.00285476	-0.023424	-0.0068385	-0.00860958	-0.00539829	0
173.6	0.0123786	-0.0272917	-0.00970184	-0.0336131	0.0041388	0.0462609	-0.0479595	0.00266099	0.0289742	0.0287307	0
173.8	0.0332118	0.0514852	-0.0199753	-0.0087003	0.00491413	0.0489697	0.000810954	0.0220302	0.00233004	0.0225874	0
174	0.0136322	0.0355463	-0.0112863	-0.0229472	-0.0102939	0.082116	0.0209019	0.032246	0.0149011	0.0208185	0
174.2	-0.00194239	-0.0144993	-0.0167552	-0.0232311	-0.0272815	0.033683	0.0946355	0.0166318	0.0261535	-0.00322865	0
174.4	-0.0181126	-0.00671448	-0.00422928	-0.00482458	-0.000329511	0.00696279	0.00778718	-0.0352285	-0.0131675	-0.00403701	0
174.6	-0.0407802	-0.00466057	-0.000694126	-0.0088546	0.00111524	0.00142902	-0.0501819	-0.0601705	-0.0401321	0.00969857	0
174.8	-0.031079	0.00359214	-0.00142514	-0.0144572	-0.0184273	-0.0165491	0.056385	-0.0156189	-0.00117533	-0.0108554	0
175	0.0190084	0.0814782	0.0383377	0.0302484	0.0273318	0.0104001	0.0235132	0.03989	0.036905	-0.0338675	0
175.2	0.0271516	0.028989	0.00872225	0.0722083	-0.00110777	-0.0452698	0.027091	0.0566072	0.0101101	-0.0205574	0
175.4	-0.00523428	-0.0222676	0.0229875	0.029264	0.0262424	-0.0401666	0.0221793	0.0164181	-0.025239	-0.015676	0
175.6	0.0108759	-0.0493625	-0.0155757	-0.00965999	0.0335536	-0.0340061	-0.0320778	-0.0143705	-0.0229956	0.0133946	0
175.8	-0.0172034	-0.0379138	-0.0276357	-0.0121093	0.0164563	0.00145388	-0.0552214	-0.0159459	-0.0321128	0.0215184	0
176	-0.0321783	-0.00806661	0.0196364	-0.0157131	-0.00680504	0.0164196	-0.0439077	-0.0296558	-0.0352161	0.0100204	0
176.2	0.0315852	0.00135903	0.00968094	-0.010712	-0.0222553	-0.0324574	-0.0424929	-0.0510661	-0.00492603	0.0267354	0
176.4	0.00252135	0.011639	-0.0231494	0.00535058	0.0232887	-0.0057423	-0.0244864	-0.0229618	-0.0115713	0.0275727	0
176.6	0.0314898	0.00579768	0.020755	-0.0537983	0.0140311	-0.0133821	-0.0492269	0.0139666	-0.00188505	0.0021383	0
176.8	-0.0179417	0.0237799	0.00834936	-0.000530501	-0.0120064	0.00392861	0.0137997	0.00261771	-0.00681925	-0.0393122	0
177	-0.0359886	-0.0206564	-0.0210145	-0.0308345	-0.0217531	-0.00710439	0.00367857	-0.0154744	0.0150782	-0.0431246	0
177.2	-0.0188886	-0.00330459	-0.0137428	-0.0770557	-0.00831251	-0.0324317	-0.0559676	-0.0107403	0.001635	0.00668102	0
177.4	-0.0228108	0.0460614	-0.0149413	-0.0159903	-0.0121821	-0.0136898	-0.0659595	-0.0268487	-0.024378	0.0224856	0
177.6	0.00180717	-0.0287365	-0.0204721	0.007597	-0.0394843	0.0128113	-0.0606656	-0.04332	0.0262704	-0.0137319	0
177.8	0.0140349	-0.0114191	0.0347552	0.0041876	-0.00467244	0.0065788	-0.00503329	0.0300362	0.0141734	0.0233753	0
178	-0.0144048	-0.0414126	0.00613278	0.0297716	0.00355399	0.00675755	-0.00320251	0.00660422	-0.0187195	-0.0138477	0
178.2	-0.014142	0.00681953	-0.0401706	0.0142718	0.018586	-0.0448729	0.0199165	-0.0527776	0.0137469	-0.00964601	0
178.4	0.00875466	-0.0264504	-0.0264399	0.000983327	0.0201342	-0.0557014	0.018893	-0.0204115	0.0193083	0.00417379	0
178.6	0.00531351	-0.0672733	-0.0108827	0.0234017	0.005445	-0.00420753	-0.00665465	0.0099987	0.00615399	-0.00238814	0
178.8	-0.0185058	0.0201459	0.00879366	0.0183936	0.0175843	0.00418406	-0.0053767	-0.0226947	0.00959069	0.00087531	0
179	-0.0100561	0.0166124	0.0704724	-0.026465	0.0395484	-0.0424506	0.0101967	0.00544353	-0.0271415	-0.011373	0
179.2	0.0287688	-0.0457782	-0.00176599	-0.009293	0.0150463	-0.0514199	0.0593926	0.0213202	-0.00452812	-0.0077165	0
179.4	0.00190155	-0.0101187	0.010673	0.041839	-0.0129702	-0.0198419	0.000752294	-0.00237436	-0.0400869	0.00415321	0
179.6	0.00653681	0.0458357	-0.00929213	0.0104824	-0.0415198	0.0103204	0.0059142	-0.0162484	-0.0364479	-0.00803015	0
179.8	0.000227303	0.0173029	-0.0334687	-0.025851	-0.0492052	0.017049	0.0156419	0.00350654	0.0115745	-0.012483	0
180	-0.0246192	-0.036863	0.0188757	-0.0105842	-0.0187283	0.0138429	-0.011186	0.0182173	0.0285478	-0.0148413	0
180.2	-0.00677401	-0.0114178	0.0446007	0.00504677	0.00593216	-0.00345487	-0.00185505	-0.00137303	0.0155846	-0.0213409	0
180.4	-0.0170598	0.0391505	-0.00371752	0.0339138	-0.012942	-0.0390931	-0.0275172	-0.0105541	0.00906928	0.018571	0
180.6	-0.00761377	0.00206005	0.00598764	0.026967	-0.00538089	0.00687444	0.0393977	0.0189534	0.0228212	0.00516285	0
180.8	-0.0367122	0.0289307	-0.00640539	-0.00875795	0.008162	0.0556018	0.0419593	-0.0260067	0.00471166	0.0322568	0
181	-0.00181292	0.0450398	-0.0225735	-0.0153492	-0.00473084	0.0375594	0.00828555	0.019058	0.00949804	0.012029	0
181.2	0.0441144	0.0393276	-0.0218374	0.00244411	0.0215979	0.0184808	-0.00240773	0.0793032	0.0102327	-0.0149413	0
181.4	0.023023	0.0247093	-0.00518299	-0.0116883	0.0581053	0.0386004	0.001534	0.0254943	0.00355547	0.00512116	0
181.6	0.00972499	-0.040849	0.036591	-0.0110182	0.0122578	0.0332604	0.0113836	-0.0264566	0.0277809	-0.000917575	0
181.8	-0.00779644	-0.0410743	0.0299224	0.0806792	-0.00303628	0.0049375	0.00563741	-0.0457823	-0.0275787	0.0191515	0
182	-0.00712999	-0.0227621	-0.0606783	-0.0087892	-0.0125514	0.0207422	0.00957195	0.0245653	-0.0406931	0.00692232	0
182.2	0.0190774	0.0528293	0.036568	-0.00545964	-0.00754747	0.0445273	-0.0100552	0.0394101	0.0303248	0.0144156	0
182.4	0.00200922	0.0148819	0.0622513	0.0149228	-0.0254848	0.044943	0.0270286	0.0356801	0.0323115	0.0162999	0
182.6	-0.00915305	-0.0553102	-0.049027	-0.0108525	0.00190898	0.0182495	0.00211393	0.0188083	-0.0166483	0.00934767	0
182.8	0.0219785	0.00122504	-0.0551988	0.00210433	0.0513977	-0.0240818	-0.0971224	-0.0227529	-0.00534492	0.00286477	0
183	-0.00326491	0.00455187	-0.0161725	-0.0189403	-0.0227533	-0.0584436	-0.028712	-0.0114009	-0.00532359	-0.0316993	0
183.2	-0.00565225	-0.0352844	0.00828839	-0.00987124	0.00322229	-0.0725673	-0.0360501	-0.0680413	-0.0265373	-0.00812332	0
183.4	0.0143162	-0.004355	0.0353683	-0.0298815	0.0521944	-0.0419326	-0.0170873	-0.0544811	-0.011134	0.0150958	0
183.6	-0.0143211	-0.0212066	0.0443848	-0.034616	0.0127312	-0.0316676	-0.0501571	0.00453793	-0.0061224	0.000584318	0
183.8	-0.0279993	0.0247519	0.0232707	-0.0526887	-0.0194638	-0.0247447	-0.00272817	-0.00104539	-0.0136021	0.011694	0
184	0.00421115	0.0818867	0.00852454	-0.0681447	0.00996051	-0.0106134	0.0589261	-0.0366476	-0.00621167	0.0217917	0
184.2	0.00894383	0.00774222	-0.0136228	-0.0216518	0.0461009	-0.0360892	-0.0448298	-0.0292042	0.00929257	0.00411962	0
184.4	-0.00322488	0.0342099	-0.0848086	0.0128249	0.0811253	-0.0683727	-0.0395539	-0.0311897	0.0191013	0.0572567	0
184.6	0.000498631	-0.0333101	-0.0435193	0.0433572	-0.00368391	-0.054938	-0.00327423	0.00961794	-0.00875838	0.00632521	0
184.8	0.0120793	-0.0630439	-0.0588543	-0.0152489	0.00595407	-0.0229876	-0.0185752	0.00961598	-0.00453607	0.00157066	0
185	-0.0075103	0.0369432	-0.0354222	-0.0604002	0.0309772	-0.0447917	-0.0619624	-0.0207217	0.00510228	-0.00741541	0
185.2	-0.0210348	0.0720259	-1.18825e-05	-0.0403648	0.0244901	-0.0699335	-0.0030038	-0.00681926	0.00729635	-0.0334617	0
185.4	0.00812289	0.00121597	-0.0471831	-0.00863095	0.0234463	-0.068432	0.0710135	0.0109991	0.00984593	-0.0130727	0
185.6	0.0170398	0.0108812	-0.0589934	0.00990617	-0.0046486	-0.0792776	-0.0254069	-0.0413607	-0.0024828	-0.00584157	0
185.8	-0.0238109	-0.0049959	-0.00802733	-0.0119045	0.0141712	-0.025855	-0.0504159	-0.0619068	0.00228863	-0.0416148	0
186	0.00854983	0.012109	0.0236182	-0.049949	0.0383863	-0.0246185	0.018476	-0.0471502	0.000692153	-0.00986938	1
186.2	0.0512002	0.0785952	0.0398669	-0.0382102	0.00592214	0.011569	0.0299925	-0.0318883	0.00140348	-0.0472069	1
186.4	0.0630839	0.0827011	0.0518125	-0.0179798	-0.0139384	0.0595836	0.067214	0.0145185	0.00597997	-0.0326712	1
186.6	0.0748477	0.0593982	0.031119	0.0199019	0.011632	0.0651033	0.0976713	0.0261124	0.0206239	0.00492851	1
186.8	0.0959181	0.0726513	0.0197978	0.0728801	0.0196529	0.0480297	0.0251929	-0.00817324	0.0142282	-0.0465998	1
187	0.0860996	0.0341787	0.0742948	0.0307479	-0.000317716	0.0305592	-0.000965444	0.0336418	-0.0371559	-0.0218719	1
187.2	0.035057	0.0398006	0.0403077	-0.0145679	-0.00721272	0.0659549	0.0152323	0.00452657	-0.00224826	-0.0220987	1
187.4	0.0763809	0.0153437	0.0314654	0.00408373	-0.0407082	0.0982998	0.0591597	0.0507475	0.0139787	-0.0104978	1
187.6	0.0854955	-0.00293569	0.0421601	0.0123182	-0.0102611	0.104154	0.0150809	0.0594912	-0.00938388	0.026818	1
187.8	0.0423992	0.0414839	0.0173264	0.0133064	0.0154073	0.0550041	-0.0115453	0.0465523	-0.00838202	0.0146985	1
188	0.0337498	0.0548648	-0.0104495	0.0288234	-0.0106984	0.00196248	0.0219262	0.0523961	0.0251423	-0.0167949	1
188.2	0.0461501	-0.00207204	0.0189781	0.0138116	-0.0171331	0.0241099	-0.00435268	0.0224134	0.033901	0.00128267	1
188.4	0.0336923	0.0506478	0.051909	-0.0258448	-0.0445259	0.0396924	-0.0205733	0.0267658	0.00907104	-0.019382	1
188.6	-0.00112354	0.105162	-0.0269509	-0.0499634	-0.0206893	-0.0149912	-0.0431551	-0.020427	0.00891284	-0.0101692	1
188.8	-0.023575	0.0524177	0.00209564	-0.0417029	-0.0210674	-0.0652846	-0.0393933	-0.00393905	-0.0222359	-0.0228845	1
189	-0.0231942	0.0400003	0.0198838	-0.0332193	-0.0361193	-0.04616	-0.0327267	-0.0312981	-0.0572066	-0.0316784	0
189.2	0.0118903	0.0576276	-0.0193763	-0.030439	-0.0235809	-0.0224588	-0.0188773	-0.0657904	-0.0257119	-0.0123898	0
189.4	0.0487184	0.0172191	-0.0207788	-0.0169203	-0.0181489	-0.0294144	-0.00552798	-0.0514892	0.0147924	0.00122769	0
189.6	0.0198999	0.0193112	-0.015828	-0.0144758	-0.0428762	-0.0237689	-0.011192	-0.0847999	-0.0289593	-0.00261313	0
189.8	-0.02844	0.0502502	0.0181126	-0.0303628	-0.0239999	-0.0639635	0.0290207	-0.0125451	-0.0396029	-0.00175046	0
190	-0.0144119	-0.0241227	-0.0111524	0.0368693	-0.0164777	-0.0394884	-0.0745312	-0.0102253	0.0197775	0.00673241	0
190.2	0.00407243	-0.0435873	-0.0186482	0.0262412	-0.0329703	-0.00435017	-0.0796135	-0.0483302	0.0044562	0.0151911	0
190.4	-0.000554483	-0.0224242	-0.0144109	0.000399204	-0.0120241	-0.00680348	-0.0337697	-0.0113938	-0.0214903	-0.0115678	0
190.6	-0.00500332	-0.0180708	-0.0361594	0.0024697	-0.00798379	-0.020088	-0.0327054	0.0410441	-0.00285211	-0.0176487	0
190.8	-0.00857137	-0.00727497	-0.0506219	-0.0118879	-0.0513658	-0.00293041	-0.0170182	0.0271025	-0.0105796	0.00978109	0
191	-0.0133397	-0.0254972	-0.0385376	0.0380795	-0.00851282	0.0392035	-0.0435147	0.0263355	-0.0175818	-0.0345407	0
191.2	0.00762793	-0.0133355	0.0129304	0.0138415	0.0164972	0.018962	-0.050146	0.010725	0.000143455	-0.0148136	0
191.4	-0.0292043	-0.0230998	0.00739295	-0.00662223	-0.0137335	-0.0435958	-0.053548	0.00279371	-0.0258081	-0.0233763	0
191.6	-0.0336274	0.0582596	-0.00232754	-0.0655995	-0.0399014	-0.0106052	-0.037371	-0.0419158	-0.0203304	-0.0432243	0
191.8	-0.00592102	0.0483565	0.00281634	-0.073826	-0.00763672	-0.00355634	0.0346026	-0.0310146	-0.0288968	-0.0308671	0
192	-0.00748114	-0.0540273	-0.0394866	-0.0107103	0.0183984	-0.052192	0.0571642	0.0107203	-0.0448209	-0.00396874	0
192.2	-0.00277822	-0.000126658	-0.063922	0.00158644	-0.0212588	0.00274098	-0.0145976	-0.0326293	0.0141478	0.0135788	0
192.4	0.0194342	-0.0243061	0.0452407	0.0434987	-0.0229067	0.0161426	0.0336114	0.00891778	0.00795215	0.015141	0
192.6	0.00994176	-0.057196	-0.000386734	0.0482403	-0.0147118	-0.0120102	0.019979	0.0270143	0.029169	0.00565295	0
192.8	-0.00800911	-0.0504688	0.0155161	0.0423541	0.0290706	-0.00779065	0.0188723	0.0236029	0.0236778	0.0492381	0
193	0.0115107	-0.000465093	0.0415897	-0.00811956	0.0083506	0.0207501	-0.0313332	-0.00108665	0.0347985	0.0454449	0
193.2	0.0280487	0.0109848	0.00577393	-0.0026224	-0.0226357	0.0262722	-0.0644258	-0.0208444	0.0527294	-0.00679772	0
193.4	0.0173621	-0.0177717	-0.00675133	0.0628155	0.00230741	0.0169875	0.0289007	-0.00854599	0.0123607	-0.0146381	0
193.6	0.0160388	0.0257566	-0.0152151	0.00941963	-0.0251108	0.031981	0.0712426	0.0132767	-0.0229684	-0.00918874	0
193.8	-0.0251153	0.0623489	-0.0332672	0.0127148	-0.00714296	0.0437882	-0.0306532	0.0463581	0.0104026	-0.0115583	0
194	0.0163395	0.0760953	0.0232339	-0.00440883	0.0121769	0.0220424	-0.0449798	0.00334765	0.0137828	-0.00432803	0
194.2	0.0214132	-0.00237566	-0.0342073	0.00979051	0.00270722	0.00365506	-0.0350945	-0.0176779	-0.0193994	-0.00820233	0
194.4	-0.0116725	-0.0200434	-0.0327888	-0.0117141	0.0049781	0.0125313	0.0154092	0.00694377	-0.000755773	-0.00925593	0
194.6	-0.0140813	0.0261335	0.0353893	-0.0334178	0.0211312	0.0172172	0.071952	0.0161313	0.0285998	0.00179419	0
194.8	-0.021928	-0.0212036	-0.00204601	0.0229626	0.0239854	-0.0012375	0.0335173	0.0177317	-0.0117282	0.0103475	0
195	-0.0400414	-0.0520146	0.0534206	-0.00749384	0.0301952	-0.00570888	0.00944003	0.0304139	-0.0231058	0.0199902	0
195.2	0.0132133	-0.0308856	-0.0042128	-0.0304403	0.00173706	0.00133941	-0.00855295	-0.0347333	0.00185008	0.00825008	0
195.4	0.0305451	0.026292	-0.0191071	-0.0260899	-0.00752901	-0.00216727	-0.0281889	-0.0447053	-0.0101566	-0.00047552	0
195.6	-0.00731014	0.0311212	-0.00767298	-0.0521482	0.00576391	-0.0230035	-0.0139743	-0.0267582	-0.0150123	-0.00242594	0
195.8	-0.0163947	-0.0209957	0.00473851	-0.0491484	-0.0262696	-0.0303957	0.0261477	-0.0210146	-0.0284929	-0.00606313	0
196	0.00749593	-0.0411988	0.00766316	-0.00971183	-0.0361492	-0.0206106	0.0318188	0.00647012	-0.0390939	-0.00606946	0
196.2	-0.00524195	-0.0144851	-0.034925	-0.00661469	0.0379083	-0.0238919	-0.0203264	0.0283676	0.0109152	-0.000905	0
196.4	-0.0186481	-0.0184159	-0.0189784	0.0500331	-0.0135302	-0.0152906	-0.070766	-0.0180751	0.00637602	-0.00111883	0
196.6	-0.00194642	0.0154968	-0.00195349	0.0429231	-0.0233702	0.01488	-0.0575773	-0.0163632	-0.0104556	0.0202444	0
196.8	-0.00329638	-0.0216076	0.00664094	-0.0218641	0.00443791	-0.0239663	0.0432054	0.0184917	-0.0165278	0.00550165	0
197	-0.0152953	-0.00801797	-0.018083	-0.0209748	0.0109161	-0.0193335	0.0385678	0.0181629	-0.025714	0.00111585	0
197.2	-0.00302441	0.0338858	-0.0499303	0.0222112	0.00369599	0.0232507	-0.0278949	-0.000795409	-0.0124125	-0.00270159	0
197.4	0.0109231	-0.0190637	-0.00699524	0.016878	0.00168505	0.00124729	-0.0134416	-0.000604426	0.0369977	-0.0338861	0
197.6	-0.00763603	-0.0311706	0.065544	0.0164111	6.18186e-05	-0.0070115	-0.0297208	-0.0109108	0.0498998	-0.0131202	0
197.8	-0.00658487	0.0109368	0.0054861	0.0325954	0.0167099	-0.00451135	-0.0165818	-0.0342451	-0.00691985	0.0103504	0
198	0.00989295	0.033162	0.0425456	-0.033697	0.00715345	-0.00544054	-0.0430227	-0.0537329	-0.0141022	0.00829107	0
198.2	-0.00944056	-0.0437847	-0.0133358	-0.0500025	-0.00652958	-0.0239969	0.0165999	-0.0415994	0.00444912	0.00398521	0
198.4	-0.0138011	-0.0477599	-0.0363443	-0.00973234	-0.0123217	-0.0240357	0.065222	-0.00852399	0.00125767	-0.017339	0
198.6	0.00916118	0.0374479	0.0248054	0.0244761	-0.00566297	-0.0165741	0.0160727	0.0284477	-0.00899835	-0.013822	0
198.8	0.00221322	0.0387917	-0.0277874	0.0331727	0.0099035	-0.0222471	-0.0281974	0.0431162	0.0129589	0.030323	0
199	-0.00314511	0.0302579	-0.0168156	-0.0396197	-0.00573255	0.0114051	-0.0564576	0.00492808	0.0480446	-0.00962381	0
199.2	-0.0129246	-0.0206519	0.0128813	-0.0502203	-0.0201144	-0.0147877	0.0105306	0.0114706	-0.01826	-0.0277107	0
199.4	0.0247818	0.0432885	0.00603882	-0.00275095	-0.019492	-0.0116734	0.0274503	0.0278779	0.00213777	-0.00918338	0
199.6	0.0233951	0.0482913	0.00322269	0.0136554	-0.00620218	0.00263171	0.00242896	0.0352768	-0.0121259	0.000716249	0
199.8	0.01141	0.0171388	0.0308812	-0.00239695	-0.0109849	-0.0170934	0.00546259	0.0370781	-0.0380251	0.000833893	0
200	0.0237907	0.0226607	0.041423	0.0160408	-0.0207273	-0.0171351	0.0320496	0.0218026	-0.00818478	0.00459402	0
200.2	-0.00261838	-0.0308375	0.0110241	0.05777	0.00120668	0.0256716	0.0335303	0.00724479	-0.0325747	-0.00478968	0
200.4	0.0297009	0.0454415	0.00487563	0.034495	-0.0101783	0.0135221	0.00251608	0.0281765	0.0125003	-0.0156653	0
200.6	0.0164907	0.00433979	-0.00386715	0.000436432	-0.0253704	0.0262428	0.0870931	-0.0302411	-0.0155629	0.00686245	0
200.8	-0.0129616	-0.0451665	-0.0106746	0.00942211	0.0335994	0.0361689	0.0404534	-0.0696941	-0.00447347	-0.00801501	0
201	-0.00927732	-0.0421488	0.0173819	0.0341362	0.0447293	0.0602775	-0.0400088	-0.00422796	0.0225879	-0.00432287	0
201.2	0.0113786	-0.0171059	0.0360032	0.0019107	0.0156147	0.0507342	-0.0341683	0.0420721	0.0324247	0.0291197	0
201.4	0.0183727	0.0301583	-0.0107116	-0.0256214	0.0327895	-0.0243376	-0.0305337	-0.00884065	0.0354372	0.0164635	0
201.6	0.0101351	0.046474	-0.0585063	0.0527279	-0.000140186	-0.0355731	-0.0304328	-0.0196833	-0.0177275	-0.0121419	0
201.8	-0.00738221	-0.0191806	-0.0445772	0.00115048	0.00480565	-0.0108919	-0.078824	-0.0203558	0.0127466	-0.00739212	0
202	-0.0153976	-0.0172234	-0.0407892	-0.0608477	-0.00438543	-0.0143381	-0.0166024	-0.0227565	-0.00563233	0.0284498	0
202.2	-0.00989732	0.00269169	0.0440601	-0.0274022	-0.0131479	-0.030513	-0.0153352	0.000562946	-0.0206488	0.00661408	0
202.4	-0.00511833	4.88981e-05	0.0408973	0.00576524	0.000336446	-0.00193432	-0.0035124	0.016011	0.0160115	-0.0235382	0
202.6	-0.00332686	-0.00366171	-0.010681	-0.00618903	0.00573985	0.0306323	0.0590156	-0.0024998	0.0392877	-0.00600909	0
202.8	-0.00631797	-0.0100288	0.0787407	-0.00129562	-0.00360825	0.0280916	0.0427077	-0.00555253	0.012537	0.00966485	0
203	-0.0248701	0.00498779	-0.000355176	-0.0030138	0.0118869	0.0764741	0.110927	0.0359038	-0.0160915	0.0267257	0
203.2	0.000691936	0.0406245	0.0182999	0.0509008	0.00693187	0.0399749	0.0880484	0.0612836	-0.0158281	0.0233255	0
203.4	0.0255171	0.0213198	0.00523446	-0.0283924	0.0121085	0.0203203	0.0249748	0.00237531	-0.00676909	-0.00299328	0
203.6	0.0158697	0.0199062	-0.0450738	-0.0521789	-0.000628028	0.0246743	-0.0197376	0.0201364	-0.017096	0.00418275	0
203.8	-0.0153702	0.0123374	-0.0368544	0.0173741	-0.0167259	-0.00422097	-0.0248352	0.0650238	-0.000476284	0.0015997	0
204	-0.0228753	-0.0321311	-0.00617453	-0.00672833	-0.017487	-0.037753	-0.0150667	0.00477326	0.0272656	-0.0284628	0
204.2	0.010062	-0.0174553	-0.0147133	-0.0419815	-0.0319518	-0.02309	-0.0513259	-0.0250455	-0.0119008	0.000982429	0
204.4	0.013792	-0.0149099	0.00399412	0.0497439	-0.00278567	-0.00074153	-0.0819922	0.00975852	-0.00387517	0.0119502	0
204.6	0.00258285	0.0127473	-0.00150534	0.0102482	-0.000577047	-0.00743414	-0.0327991	-0.023241	0.0204545	-0.0104559	0
204.8	-0.0476986	-0.0244922	-0.0463933	-0.0272858	-0.0200386	-0.0316123	-0.0118012	-0.0233757	0.0147616	-0.00431628	0
205	-0.0422236	-0.0320487	-0.0507656	-0.00251875	-0.0245668	-0.0151971	-0.0509069	-0.00783199	0.00199677	0.00317448	0
205.2	-0.00663571	0.0114035	-0.00639781	0.00636298	-0.0105446	0.0064867	-0.0351403	-0.0233607	-0.0105637	0.0065964	0
205.4	-0.0337302	-0.016611	0.0097495	-0.00537564	0.0116117	-0.0121584	0.0212235	-0.033405	-0.0389663	0.0240872	0
205.6	-0.00942184	-0.0530197	-0.0140827	-0.00336328	0.0304825	-0.0100247	-0.0172735	-0.0371156	-0.0487526	0.00592261	0
205.8	0.0390749	-0.0224334	-0.0390284	0.00734796	0.00901363	-0.0466377	0.0410928	0.00633649	-0.0212076	0.0151002	0
206	-0.00723542	-0.0189138	0.0348557	-0.020854	-0.00263451	-0.0172215	-0.0143102	-0.0200024	0.0135875	0.0103292	0
206.2	-0.00713563	0.0303307	0.0148022	0.0237993	0.00206167	-0.0225691	-0.0153759	-0.0383175	0.0230075	0.00327498	0
206.4	0.0117609	0.0369223	0.0226258	0.0184955	0.00320221	-0.0298369	0.0397083	-0.0165467	-0.00101696	-0.0141001	0
206.6	0.00257784	-0.0390643	0.0984969	-0.0563618	0.00267363	-0.0141591	0.0279565	-0.00296716	-8.25135e-06	-0.0302956	0
206.8	0.0510392	-0.024925	0.0190052	-0.0162327	0.0122229	-0.0549574	0.0294847	0.00272091	0.0352805	-0.00949936	0
207	0.0403229	0.024756	0.00276669	-0.0214926	0.028004	-0.0167939	0.0347005	-0.00346837	-0.00658662	-0.00832149	0
207.2	0.0137522	-0.00732226	-0.00466978	-0.00244705	0.0363583	0.00592544	0.0155009	0.00897848	0.0108919	-0.0128295	0
207.4	-0.0169934	0.0255334	-0.040369	-0.0017107	-0.0259368	0.0132626	-0.0119371	-0.00580244	-0.00999119	-0.0106745	0
207.6	-0.0070125	0.0229071	-0.0593264	-0.0205266	-0.0480472	0.0294012	-0.0373034	-0.0150317	-0.0117922	-0.0203412	0
207.8	-0.00516292	-0.0186197	-0.0564356	0.0115279	-0.00881214	0.0350398	-0.0419619	-0.00980836	0.0236751	-0.0391427	0
208	-0.0246221	-0.00613836	-0.0316697	0.0676016	-0.00140264	0.0165731	-0.0276503	-0.0157901	-0.00420266	-0.0286036	0
208.2	0.0173145	-0.0263612	0.041879	0.04594	-0.00675746	-8.49739e-05	-0.0251747	-0.0136359	-0.0570137	0.00331939	0
208.4	-0.0130865	-0.0122596	0.0686197	0.0160815	0.0106021	-0.00201157	-0.00803583	-0.0148619	-0.0222393	-0.0188296	0
208.6	-0.0149063	0.0212975	0.0150572	0.00182262	0.0395785	0.000351362	0.0169908	0.0168251	0.00130309	0.000997006	0
208.8	-0.0155335	-0.0125652	0.0222848	-0.00206871	-0.00500808	-0.00802248	0.010374	0.0245712	0.00257929	0.0257045	0
209	-0.00782454	-0.0142772	0.0140459	-0.0154979	-0.0348827	-0.0224596	0.0061978	-0.00649101	-0.00730613	0.0315912	0
209.2	0.0176489	0.03109	-0.0114044	-0.0348354	0.00789564	-0.0268698	0.0173066	-0.000575975	0.00274677	0.0269685	0
209.4	0.0163371	0.0100205	0.0418579	-0.0350936	0.0206983	-0.00264829	0.0124259	0.0273689	0.034487	0.0133001	0
209.6	0.00257873	0.00577752	0.0180481	-0.0241199	-0.00811328	0.0417119	0.0220507	-0.0246922	0.0101788	0.0233205	0
209.8	-0.00101238	0.052904	-0.0180324	-0.0220391	0.0118013	0.0304676	0.0401909	0.013444	-0.00210282	0.0392969	0
210	0.0277508	0.010744	-0.00904916	0.0370554	-0.017704	0.0204089	0.00822253	0.045686	-0.00411827	0.0087958	0
210.2	0.0169573	0.00205293	-0.0155319	0.0352082	-0.012939	0.0403853	0.0068314	0.0855475	0.00305433	0.00479166	0
210.4	-0.00180745	0.0726431	-0.017383	0.0130399	0.0240419	0.0854207	0.0321246	0.0682147	0.022569	0.0252958	0
210.6	0.0160108	0.0696443	0.00784787	0.0354008	0.0229275	0.0994228	0.0399082	0.00878007	0.0126779	0.0124162	0
210.8	0.0156553	-0.00304626	0.0115375	0.00512968	0.0137641	0.0515309	0.0360185	0.0465638	-0.0233112	-0.016572	0
211	0.0118886	0.0391266	0.0293903	-0.0182792	-0.0181927	0.0418085	-0.0399913	0.0275196	0.0159147	-0.0470747	0
211.2	-0.0193025	-0.03158	-0.0205237	-0.0329574	-0.0174387	-0.00689524	-0.0395061	-0.0176765	-0.00285222	-0.0483217	0
211.4	-0.0244582	-0.0918481	-0.0344837	-0.0396331	-0.00997083	-0.0470179	-0.0219746	-0.029372	0.00911104	0.00584175	0
211.6	-0.0364262	-0.0656768	-0.0127312	-0.0193819	-0.0194917	-0.0667851	-0.0553096	-0.0364068	0.000382739	-0.00179449	0
211.8	-0.0453773	-0.0183772	-0.0290821	-0.00283928	-0.0122374	-0.0712274	-0.0375262	-0.0513854	-0.0282856	-0.0235145	0
212	-0.00844105	-0.0161411	-0.031982	-0.0220388	0.00777731	-0.0449792	0.0331061	-0.0470272	-0.00240814	0.0172412	0
212.2	0.00226744	-0.0559173	0.029061	-0.0285887	-0.00946554	-0.0172816	-0.0174998	-0.0375354	0.0103217	-0.0116535	0
212.4	-0.0374	-0.0427014	-0.0151382	0.00149759	0.00322284	-0.0253929	-0.0443765	-0.0372948	0.0274714	-0.00660872	0
212.6	-0.0171813	-0.0657759	0.0111237	0.017618	0.0146653	-0.0369793	-0.011544	-0.00823969	0.0162313	0.00117263	0
212.8	0.0178548	-0.0118439	-0.0173813	0.0309627	-0.00667637	-0.0424507	-0.00859987	0.0211669	-0.00500948	-0.00964586	0
213	0.015882	0.0496016	-0.0374533	0.0272549	-0.000109201	-0.0440639	-0.000312869	-0.0100979	-0.0267393	-0.00182994	0
213.2	0.0202902	0.0349275	0.0284642	0.0152948	0.0125473	-0.0205872	0.0111224	-0.0364368	-0.0125723	0.00566979	0
213.4	0.0414239	0.024784	0.0317108	0.0214042	-0.0207375	0.0148287	-0.00635633	0.0238725	0.0255901	-0.0180325	0
213.6	0.0140006	-0.00133751	-0.0284329	0.000783306	0.00819216	-0.003622	0.0539435	0.0503482	-0.0236033	-2.53537e-05	0
213.8	0.0180479	-0.00529005	-0.0670989	-0.00153374	0.023089	-0.0184286	0.0115549	0.0126321	-0.0181854	0.0220685	0
214	0.0156687	0.0534572	-0.0414045	-0.0130239	0.00301575	-0.0134028	-0.00430479	0.0320499	-0.00567671	-0.00282129	0
214.2	-0.00608599	0.039065	-0.0232685	-0.0470569	-0.0255239	0.0284298	-0.029999	0.000194647	-0.00535862	0.0339105	0
214.4	-0.00985123	0.0133545	0.0328873	-0.0133375	-0.019421	0.0194127	0.0162158	-0.0357299	-0.0150484	0.0426121	0
214.6	-0.0139105	0.0423404	0.0788945	0.0452049	0.0130175	-0.0292894	0.0933716	0.0189147	-0.0200133	-0.0271507	0
214.8	-0.0348808	-0.00139265	-0.00561496	-0.0294888	0.016168	0.0111189	-0.0209566	0.0238586	0.0107716	-0.0112365	0
215	0.0226749	-0.0045917	0.0484025	-0.064107	0.000502027	0.00859498	-0.0314581	-0.0185687	0.0248872	-0.0221866	0
215.2	0.0217661	-0.0154875	0.0537755	0.056445	-0.0163926	0.0144779	-0.0289877	-0.00717443	0.00906484	0.0278625	0
215.4	-0.0069153	-0.0492113	0.00241922	0.0356405	-0.00604962	0.0165585	0.00468689	0.000915064	-0.00790753	-0.00614742	0
215.6	-0.0131961	0.0141796	-0.0308174	0.000683506	0.0178727	0.00190182	-0.0255803	-0.0488068	-0.00146129	-0.0148788	0
215.8	-0.00661876	0.0841527	-0.0134082	0.0143497	0.00624784	0.0127751	-0.0673706	-0.0474629	0.0147045	0.0135159	0
216	-0.0104486	0.0231687	0.00824553	-0.0331604	-0.0253979	0.0408825	0.00105199	0.00311369	0.00542769	-0.0326266	0
216.2	-0.0197337	-0.00927923	-0.0270386	0.022055	-0.00208733	0.00410067	0.0283026	-0.0502409	-0.0283314	-0.00904944	0
216.4	0.0129087	-0.0369853	-0.00936	0.00657525	0.0242342	-0.0462807	0.0116144	0.0372055	-0.0271526	0.0136628	0
216.6	0.0139155	-0.0820156	0.0205798	-0.0216349	0.0227393	-0.01929	-0.0500976	-0.00485189	0.0227794	0.00345856	0
216.8	-0.0263608	-0.0584519	0.0519422	-0.00144435	0.0158103	0.0181754	-0.0160027	-0.0322234	0.0269928	0.00152994	0
217	-0.0227041	-0.014764	0.0211084	0.0436391	-0.00341773	0.0151845	0.0317153	0.00871369	-0.0325406	0.0200918	0
217.2	0.014411	-0.000818353	-0.0304403	0.0454641	-0.0154067	0.0109396	0.0156273	0.00216308	-0.0429906	0.0341507	0
217.4	-0.00182539	0.0235615	-0.00373713	-0.00543592	0.0111574	0.0275641	0.045337	-0.0043166	0.0198955	0.0197679	0
217.6	-0.012718	-0.000206616	-0.0213396	-0.0245814	0.0123161	0.0288088	0.0690572	0.0439602	0.0058201	-0.0300011	0
217.8	0.0131351	-0.0139122	-0.0233974	-0.0295869	0.00037028	0.0243238	0.0501011	0.0714163	-0.0057593	-0.0547878	0
218	0.0242988	0.0310908	-0.000423544	0.0306813	-0.0119463	0.027919	0.0144198	0.0427631	0.0141766	-0.0169852	0
218.2	-0.000221598	0.0586938	0.0137475	0.0456525	-0.033977	0.0056206	0.00344553	0.0207665	0.0488462	0.0215672	0
218.4	0.00342926	0.0502946	-0.00205728	-0.0162125	-0.0196205	0.0241954	-0.00342182	0.0591639	0.0543504	0.0127645	0
218.6	0.0338095	0.0151062	-0.00109242	-0.0358381	0.0305579	0.0757147	-0.0149924	0.0643538	0.0138429	0.00522249	0
218.8	0.00929619	-0.049823	0.0363874	-0.00804969	0.0204924	0.0248757	-0.00384606	-0.0204406	0.000959101	0.0295594	0
219	0.00315856	-0.00111899	-0.0162696	-0.0420013	-0.019376	-0.00857234	-0.0239338	0.0170694	0.0623893	-0.00200939	0
219.2	0.0129423	0.0148634	-0.0250024	-0.00505449	-0.028727	-0.0719953	0.00627375	-0.0345836	-0.0101644	-0.0132191	0
219.4	0.0129431	-0.00963769	0.015847	-0.0220549	-0.0263419	-0.0428131	0.00411253	-0.007797	-0.0545423	0.00610796	0
219.6	-0.0111553	0.000613217	0.0150729	-0.032777	0.00426859	-0.0326346	-0.0119855	-0.00643922	-0.0152999	0.0191602	0
219.8	-0.034747	-0.0164988	-0.0156131	0.00893464	0.0257771	-0.0623897	0.0178618	-0.0691781	0.00184364	0.026126	0
220	-0.0119332	-0.0737546	-0.000117074	0.0142758	-0.00499227	-0.00086923	0.0111267	-0.031632	-0.0170861	0.0135177	0
220.2	0.0382996	0.00198645	0.0122778	0.0323915	0.00100994	0.0280332	-0.0847162	-0.0232718	-0.0216604	-0.0386945	0
220.4	0.0104593	0.0555932	-0.0551086	0.0106192	0.0269245	0.0226448	-0.0666572	-0.0226731	-0.0244885	0.00326634	0
220.6	-0.0435985	0.0137855	0.00011635	0.00209766	0.0230529	0.00316506	-0.00234041	-0.0333338	-0.0221313	0.00497889	0
220.8	-0.0307086	-0.012472	0.0333143	0.0274317	-0.00425103	-0.0132525	0.0104439	-0.0155773	-0.00203505	-0.00150952	0
221	-0.00408282	-0.00985517	-0.035825	0.0329203	-0.0152818	-0.00357918	-0.0156892	0.00895507	0.00492806	-0.0194651	0
221.2	-0.0148375	-0.0393115	-0.0459398	0.00713723	-0.00356133	-0.00509785	-0.0334861	0.00103581	0.00688927	-0.0402052	0
221.4	-0.0049626	-0.0635704	0.0222109	-0.00337944	-0.000925083	-0.0478487	-0.0236336	-0.0112928	0.02241	0.00334845	0
221.6	0.00792345	-0.0347533	-0.00201736	-0.0161219	-0.0120109	-0.039098	0.02052	-0.0174585	-0.0206595	-0.0102641	0
221.8	-0.00655123	-0.009987	0.0540811	-0.0301679	-0.00525915	-0.040574	0.0403823	-0.0285837	-0.00139701	-0.0280929	0
222	-0.00245994	-0.0147851	0.0266178	0.019254	-0.00849222	-0.0174825	0.0366211	0.0221042	0.00259887	0.00457908	0
222.2	0.017717	0.0185817	-0.0207429	-0.0167631	0.00853825	-0.0150077	0.0233832	0.0670489	0.0189434	0.00606182	0
222.4	0.0110752	0.0340881	-0.0031873	-0.047711	0.011574	-0.00740489	0.0112674	0.0522284	0.0150607	-0.00573591	0
222.6	0.00587298	0.00269726	-0.00391733	0.060163	-0.0145352	0.0228832	-0.0114061	0.024355	-0.0430955	0.0206622	0
222.8	0.0380668	0.0529011	-0.00520309	0.0608375	0.0236435	-0.0167502	-0.0465811	-0.000287188	-0.0264484	0.00032161	0
223	6.08657e-06	0.063182	0.0666949	-0.0365678	0.0370318	-0.00190384	-0.0115541	-0.0310659	0.00203025	-0.017377	0
223.2	0.0204392	0.021773	0.0215859	-0.0479505	-0.0234455	0.0289549	0.0415404	0.00379985	0.000134678	0.0202155	0
223.4	0.0493502	0.0494622	0.00609124	0.0132847	-0.0279471	0.0299965	0.00694481	0.0272416	0.00268986	0.00581791	0
223.6	0.00745979	0.0777994	0.000303838	0.012991	-0.00839253	0.0134785	0.0144704	0.0135583	0.00135321	-0.0190449	0
223.8	-0.018051	0.0163909	-0.0289802	0.00181756	-0.0022671	0.0169759	0.0312412	-0.00355485	-0.00942866	0.012422	0
224	0.0116771	-0.0362489	-0.00866089	0.0524753	0.0285213	0.0418513	-0.0399513	-0.0179691	0.00235323	0.0190116	0
224.2	-0.038031	-0.00467751	-0.0387813	-0.00412429	-0.000499511	0.0370863	0.04682	-0.0176053	0.0118467	-0.0261393	0
224.4	-0.0117885	-0.0130284	0.0144001	-0.0551833	-0.0174196	-0.00207853	0.0480993	-0.00682905	-0.0208836	-0.0131813	0
224.6	-0.00303794	-0.0732228	0.0574579	-0.0336794	0.0053778	0.0156849	0.0231775	0.0250793	0.0174492	0.00406675	0
224.8	-0.0136356	-0.0191297	-0.0108861	0.00861672	0.000167063	0.00990317	-0.001738	0.00414634	0.0154515	0.0107517	0
225	-0.0343544	-0.00513067	-0.0571713	0.00849014	0.00797166	-0.0106927	-0.0129163	0.000558516	-0.00782942	0.00382148	0
225.2	-0.0309256	-0.0765043	0.000825771	-0.0342161	0.0239729	0.00968401	-0.0191524	0.0364022	0.0301491	0.00186665	0
225.4	0.0213915	0.0257008	0.0124515	-0.0548395	-0.0305748	-0.00151307	-0.0639372	-0.0175556	0.0244334	0.0273061	0
225.6	-0.0290604	0.0500809	-0.0314014	-0.00124524	-0.0133154	-0.0414546	-0.0592023	-0.0528038	-0.020841	-5.57991e-05	0
225.8	0.0178747	-0.0467704	-0.0112258	0.0173327	-0.0342689	-0.0477641	-0.0272253	-0.0387196	-0.00382184	-0.0174101	0
226	0.0137711	-0.0367992	-0.0191343	0.0172614	0.0138517	-0.0511516	-0.0320813	-0.0113302	0.0021559	-0.00843222	0
226.2	-0.00958646	0.0326367	0.0274192	0.0117424	0.0284615	-0.0250221	-0.00657711	0.0100665	0.0198733	0.0141577	0
226.4	0.00620999	0.0130854	0.0480825	0.0329349	-0.00745603	-0.00490163	0.0177817	-0.018303	0.0147153	0.0210739	0
226.6	-0.00225818	-0.0255649	-0.0486599	0.0636967	0.0061706	-0.014805	0.0141237	-0.0494238	-0.0302222	-0.00327596	0
226.8	-0.000831017	0.0124624	-0.00418415	0.0170665	-0.0131224	0.0372689	0.10282	0.0144039	0.0134714	-0.0276141	0
227	0.00356567	-0.0130994	0.0655974	0.0147325	0.0124088	0.0451897	0.0958397	-0.0195226	-0.00540018	-0.0298921	0
227.2	-0.0132378	0.00770693	-0.00152753	0.00987583	0.01808	0.0344513	0.0198688	0.0505819	0.00474007	-0.00336119	0
227.4	-0.00655775	0.0109564	-0.0465174	0.00128904	0.000125318	0.0199209	-0.00623949	0.0742228	0.00877586	-0.00213277	0
227.6	0.00123673	-0.0166114	-0.00855998	-0.00996941	-0.00427132	-0.00378651	-0.0195397	0.0142308	-0.0221835	-0.0118099	0
227.8	-0.00363957	0.00108279	0.0283567	-0.0192313	-0.00378646	-0.0196822	-0.0197963	-0.0160247	-0.025115	0.028585	0
228	0.00727901	0.0361929	0.0297822	-0.00908742	0.00318234	-0.0217495	0.0278916	-0.0185653	0.0225376	0.0686783	0
228.2	-0.00870927	0.0059762	-0.0051646	-0.00493566	0.0429027	-0.0340572	-0.0256131	0.00340631	0.0357536	0.00354556	0
228.4	-0.0126457	-0.0243579	-0.0118265	0.00863617	-0.0208534	-0.0150768	-0.0568986	0.0232575	-0.0340194	-0.01703	0
228.6	-0.0219744	-0.0388392	-0.0179969	0.0112076	-0.0205233	-0.000142177	-0.017096	0.0308241	-0.0110265	-0.0223459	0
228.8	-0.0465543	0.0452037	-0.0380596	-0.0199573	-0.0030817	-0.00922525	-0.0437852	0.00741675	0.0260431	0.00428439	0
229	-0.00630279	0.0389219	-0.0396654	-0.00130344	-0.00506212	0.00669542	-0.0643647	-0.0100859	0.0120098	0.0193058	0
229.2	0.0393425	-0.0526943	0.00320506	0.030932	0.0083797	0.0186134	-0.00499995	0.00739859	0.000574086	0.00198056	0
229.4	-0.0386406	0.0457757	0.0421562	-0.0360875	-0.0133747	-0.0185132	0.00578806	0.0129977	-0.0111436	0.0195425	0
229.6	-0.00860271	-0.0429482	-0.00653626	0.0170922	-0.0193362	0.0451216	0.0701306	-0.00745628	0.000532881	-0.0214013	0
229.8	0.018778	-0.0298079	-0.0278988	-0.00327865	-0.0200951	-0.00857134	0.0117436	-0.0454461	0.000282387	-0.0103349	0
230	-0.00183205	-0.0198634	-0.00133027	-0.053612	-0.0286732	-0.00301467	-0.0402087	-0.0542277	-0.0309139	0.0113124	0
230.2	-0.020232	-0.021234	0.0127601	-0.00652896	0.0259625	0.0350932	-0.0287734	-0.0321634	-0.0218311	0.0149325	0
230.4	0.00564531	-0.00680858	0.00295505	0.0243193	0.0469532	0.0122891	0.00632784	-0.0113123	-0.00112193	0.00624479	0
230.6	0.0301347	-0.00575588	0.0126601	-0.0361288	-0.0293959	-0.00392043	0.0155323	-0.00666792	-0.0185068	-0.0145801	0
230.8	0.00244436	0.0539768	0.0382313	-0.00853278	0.0025414	-0.0106626	-0.0300321	0.000173499	0.0201116	-0.0120398	0
231	0.0448216	0.00127821	0.0127269	-0.0430275	-0.0076316	0.0152364	0.0645862	0.0435599	0.0267345	0.0101614	0
231.2	0.00643901	0.0335642	-0.0501339	-0.05046	0.00559034	-0.00854141	0.000640058	0.0527003	0.00951399	-0.00321066	0
231.4	-0.00267849	0.0433624	-0.027986	0.0154586	0.0218269	-0.0308478	-0.0455528	-0.0163561	0.00867041	0.0279321	0
231.6	0.020244	0.0145142	0.0448535	0.0314107	0.00231468	-0.0203657	0.0233463	-0.0393861	-0.011893	0.0177492	0
231.8	0.0104355	0.0268226	0.0323818	0.00515841	0.0037376	-0.00352772	0.0454178	0.00953307	-0.0241303	-0.0521031	0
232	0.0129344	-0.00512564	-0.0388378	0.0444246	0.0219514	-0.00263659	0.013937	0.0166729	0.018221	-0.0262132	0
232.2	-0.0236358	-0.0808879	-0.0298242	0.0176469	-0.0538359	-0.0386682	0.0403436	0.029874	-0.0096992	-0.00710959	0
232.4	-0.00695348	-0.0408643	-0.0269588	-0.00228708	-0.0257246	-0.0124515	0.0429974	-0.0353327	0.00123483	-0.0349294	0
232.6	-0.00325667	-0.0123454	-0.0236355	-0.0268443	0.0214643	0.017441	-0.000890859	-0.00173926	0.0368463	-0.00663092	0
232.8	-0.0179064	0.0496552	-0.00749418	-0.0215534	0.00130692	0.0067439	0.000692723	-0.00644506	0.0264527	0.0393971	0
233	-0.010743	0.063462	0.0182355	0.0391868	-0.013856	-0.0161772	0.0193802	-0.0529567	-0.00435037	0.0108351	0
233.2	0.00406801	-0.02787	0.0324069	0.0459676	0.0176234	-0.0151163	-0.0120622	-0.00946178	0.000479631	-0.0245618	0
233.4	-0.00163226	-0.00902819	0.0200566	-0.0462092	0.0276625	0.00446082	-0.0331497	0.0179961	0.00148108	0.0273942	0
233.6	-0.0041457	0.00848318	0.038123	0.00604325	0.0347269	0.00529059	-0.0421332	0.0577455	-0.0355524	0.0201169	0
233.8	0.0123799	0.0446595	0.0129428	0.040265	-0.00868264	0.00645594	0.0333986	0.00602669	0.000218039	0.0190844	0
234	0.00409196	-0.0442427	-0.00654496	0.0367538	-0.0176396	0.0355799	0.0127073	-0.000838727	0.0247054	-0.0194361	0
234.2	-0.0131764	-0.0505947	-0.0165569	0.0207913	-0.00645894	0.00767552	-0.0408349	0.0212601	-0.012216	-0.0267354	0
234.4	0.00623754	0.0406503	0.0106713	0.0241146	-0.00257306	-0.0225799	-0.0352515	-0.00370468	-0.0379488	-0.00378829	0
234.6	0.026731	0.001437	0.0568908	0.0552362	0.00589426	0.0456032	-0.0278277	-0.0091155	-0.0207131	-0.0252398	0
234.8	-0.00385733	0.00595552	-0.0192988	0.0215468	-0.0226023	0.043347	0.0201429	0.0209369	-0.0206867	0.0088105	0
235	0.0178764	-0.041088	-0.00109248	-0.0382473	0.0162484	-0.0149372	-0.00243844	0.00221926	-0.0144562	0.0148254	0
235.2	0.0345118	0.0129653	0.0525868	-0.0158582	0.00304699	0.0145182	-0.0150409	0.00760313	0.0133898	0.0157633	0
235.4	0.0305358	0.0780172	0.0375116	-0.0308409	-0.00624495	0.033503	0.00728712	0.00731984	0.0186416	0.00216565	0
235.6	0.000942453	0.049129	-0.018201	-0.0576846	0.00937552	-0.00699218	0.00437759	0.0105468	0.0261946	-0.0116006	0
235.8	-0.00665871	-0.00506155	-0.0503649	-0.00856871	0.00889098	-0.019292	-0.0219996	0.0266616	0.0497767	0.00333269	0
236	0.0353165	-0.00555758	-0.0418069	0.000424794	0.0137362	0.00494369	-0.0112762	0.0139961	0.0246211	0.0143047	0
236.2	-0.0162256	0.0176318	0.00566896	-0.0586222	-0.000694682	-0.00332284	0.0163767	0.0372435	-0.024337	-0.00920089	0
236.4	-0.00734758	-0.0243033	-0.0188959	0.00501471	0.0128735	-0.0150276	0.0356478	0.00789415	-0.0323372	-0.0183865	0
236.6	-0.0018351	-0.0462056	-0.0433112	0.0525573	0.00046245	-0.0337569	-0.0436459	-0.0524923	0.0167361	-0.0135321	0
236.8	-0.0302765	-0.0482185	-0.0140749	-0.0141931	0.00258832	-0.026705	-0.0634261	-0.0217798	-0.00806461	0.00614676	0
237	-0.0374176	-0.0235668	-0.00100617	-0.0806633	0.00111849	0.00238523	-0.0114397	-0.00582511	-0.0495689	-0.00281774	0
237.2	-0.0130279	0.0246021	-0.0114981	-0.0338455	-0.0367483	0.0181295	-0.00474332	-0.0684205	0.00608525	-0.0275974	0
237.4	-0.00714047	0.00595457	0.037711	0.0491586	-0.0151514	0.0187857	0.0168492	-0.00950789	0.0194435	0.0260662	0
237.6	-0.0354144	-0.00158605	0.0243111	0.0376211	0.0129703	-0.0195994	-0.0360847	-0.00276313	-0.00087778	0.0486374	0
237.8	-0.0157907	-0.0250707	-0.0350656	0.0106463	0.0214616	0.00992086	0.00369373	-0.00475657	0.0179024	0.0338465	0
238	-0.000734261	-0.0402513	0.033699	0.0149181	0.0167831	0.00442547	0.0361565	0.0191019	0.0185348	0.0157186	0
238.2	-0.00708146	-0.0214932	0.030205	0.0189542	-0.0112984	0.0031893	0.039202	0.030851	-0.0117644	-0.0192469	0
238.4	0.0061056	0.0283174	-0.0497056	0.0205301	-0.0200241	0.0167875	0.0624151	0.0209855	-0.0198689	-0.029283	0
238.6	0.025824	0.0726735	0.0242013	0.0302931	0.0105683	-0.0211185	0.0455006	0.0026291	0.00386788	0.0147798	0
238.8	0.0106906	0.0378269	-0.00830269	0.00163519	-0.0137874	0.0166974	-0.0141164	-0.0224813	0.0166531	-0.0035181	0
239	-0.0095273	-0.0510758	-0.0332926	-0.0232831	-0.00301391	-0.0181102	-0.0187846	0.0464842	-0.0111729	-0.0168516	0
239.2	0.0101856	-0.0460025	-0.0119517	-0.0460544	-0.0123156	-0.0106666	-0.0245736	0.019843	-0.0104222	0.012159	0
239.4	0.0455808	-0.00796478	-0.0349979	-0.0296101	-0.0188654	0.013092	-0.00493673	-0.0199945	-0.0261635	0.0115016	0
239.6	0.0144497	0.0292339	-0.0231192	0.00854332	-0.000632382	-0.00621376	0.0459829	0.0104924	-0.0241288	-0.0132381	0
239.8	-0.0386187	0.0346811	0.037773	0.00903067	0.0035705	-0.0214174	0.0491032	0.0264357	0.0128974	-0.0206204	0
240	-0.0106154	-0.0338401	-0.00260206	-0.019205	0.000133752	-0.0219261	-0.0157335	-0.0113089	-0.0039028	-0.0315675	0
240.2	-0.0252608	0.0329291	0.0155073	-0.028538	0.0337011	-0.0587434	-0.0546059	-0.0538743	0.0138522	-0.0133589	0
240.4	8.88778e-05	0.0513796	0.0500293	-0.0110289	0.025773	0.00824966	-0.0379529	-0.0181869	0.0170049	0.00103089	0
240.6	0.0266904	0.00892159	0.0230868	0.0271506	0.0203324	0.0489009	-0.0342776	0.0155682	0.0475322	0.027449	0
240.8	0.0156127	-0.0264468	0.00697265	0.066631	-0.0102259	0.0495734	-0.0179136	0.00678419	0.0189126	0.0108495	0
241	-0.00305284	-0.0303583	0.0162009	0.048166	-0.0197624	0.0308183	0.0288465	-0.00431997	-0.0281726	-0.019952	0
241.2	0.00536908	-0.00885871	-0.00779233	-0.0250284	0.0131599	-0.00841734	0.0222517	0.00228431	0.0157815	0.00865884	0
241.4	0.0257936	0.0236933	-0.00506223	-0.0222114	-0.0414321	0.013025	-0.0502015	0.00178089	0.0123487	0.0248656	0
241.6	0.00840731	0.0483053	0.0321359	0.0578913	-0.00621928	-0.00609181	-0.0297896	-0.0114122	-0.0374431	0.0192654	0
241.8	-0.00924878	0.0267087	-0.00627682	-0.0181583	-0.00988003	0.00214005	0.0168844	-0.0127501	-0.00580868	0.000190861	0
242	-0.00256252	0.0423971	-0.033333	-0.0543008	-0.029412	0.0118819	0.0195435	-0.0126248	0.0183816	-0.0300545	0
242.2	0.00154352	0.026895	0.00653648	0.00316344	-0.00996731	0.030376	0.0445924	0.0126704	0.0187022	-0.030679	0
242.4	-0.00463691	0.0040819	0.0141057	0.0282211	0.0153313	0.0428012	0.0646657	0.0202629	0.0201885	-0.00807198	0
242.6	-0.00355795	0.0431178	-0.0418352	0.0192953	0.0170476	-0.0128895	-0.00707581	-0.0403253	-0.0116443	-0.00743851	0
242.8	-0.0143001	-0.0720104	-0.017216	-0.0204207	0.0102967	-0.0490647	-0.0239466	-0.0394307	-0.00610216	0.00431588	0
243	-0.0164987	-0.014908	0.0400999	-0.0236034	0.0103983	-0.00866658	0.00130241	-0.0141026	0.0251085	-0.0077333	0
243.2	-0.0259057	-0.0352239	0.00812013	-0.0153637	0.0186697	-0.0135104	-0.0239023	-0.0174762	0.0137009	0.0181825	0
243.4	-0.00972545	-0.0832645	-0.0396756	0.0127331	-0.0102758	-0.0565461	-0.0238374	0.00298512	-0.0473982	0.00541292	0
243.6	0.000423464	-0.0476438	-0.0258482	-0.00529534	0.000108078	-0.034188	0.00442996	0.0286333	-0.0514613	-0.00505195	0
243.8	-0.0282134	-0.0294805	0.00726547	-0.0589597	0.0437316	-0.0136949	-0.0257786	0.00836044	0.00529712	0.0289325	0
244	-0.0364645	-0.0499612	-1.5614e-05	-0.020021	-0.0221463	-0.0930716	-0.0493603	-0.00577554	-0.0164636	-0.00916959	0
244.2	-0.0303375	-0.0338066	-0.0486255	-0.0179545	-0.0188395	-0.0376777	0.0308102	-0.0068074	-0.0391972	-0.00773789	0
244.4	0.0284446	-0.0114442	0.00261834	0.00667733	0.0100287	0.00585094	0.037149	-0.022195	0.00517689	-0.0235734	0
244.6	0.0275613	-0.0357368	0.0284111	-0.00601743	-0.00129938	0.0420022	-0.0134004	-0.00433464	-0.00722527	-0.00409785	0
244.8	0.0146257	0.0394756	0.00365748	-0.00135526	-0.00786299	0.0454164	0.0243186	0.0141881	-0.0198126	-0.000322634	0
245	0.0286719	0.124623	0.00167836	0.0351423	0.00217358	0.00539985	0.0646141	0.0132461	0.0177773	-0.031076	0
245.2	0.0216698	0.0542974	0.0132228	0.042912	-0.00813266	0.000354782	0.000851923	0.0174672	0.00884719	-0.0148332	0
245.4	0.0454232	0.047883	0.00618489	0.0720042	-0.010685	0.032933	0.00450008	0.0030908	-0.023417	0.0219975	0
245.6	0.0340116	-0.0131929	-0.0108748	0.0300902	-0.024087	0.0433307	-0.0325429	0.0228806	0.0076009	0.0335938	0
245.8	0.0185695	0.0241704	0.0052893	0.0121528	0.000248587	0.0168893	-0.0420291	0.00228908	0.00336601	-0.00714884	0
246	-0.00417852	0.0421243	0.032662	-0.00471329	0.0279331	0.0205412	-0.009797	0.0108404	-0.00337997	0.00192059	0
246.2	-0.00092228	0.00897818	0.043491	-0.0186255	0.013222	0.014883	0.0240057	0.0365061	0.0404275	0.0316452	0
246.4	0.0328392	0.0290638	0.0229501	-0.00375094	-0.0197883	-0.0152401	0.0364171	0.0232918	0.0618041	0.0146102	0
246.6	0.0221965	0.047537	-0.0255896	0.0027164	-0.0233873	0.00876521	0.0204627	0.0256183	0.0180421	0.00734314	0
246.8	-0.0241857	-0.0203894	-0.0403846	0.00904671	-0.000897595	0.027216	-0.00648956	0.0504169	0.0285931	0.0124766	0
247	-0.0250034	-0.0400057	0.00584638	-0.0113059	0.00832856	0.0415314	0.0244061	0.0436056	0.017591	0.0204954	0

## Sheet: fly3
Time	gamma-L5	gamma-L4	gamma-L3	gamma-L2	alpha-L	gamma-R5	gamma-R4	gamma-R3	gamma-R2	alpha-R	stimulus			Time	gamma-5	gamma-4	gamma-3	gamma-2	alpha	stimulus
0											0			0	-0.0161389	-0.0349374	-0.00648852	0.00898523	-0.000931172	0
0.2											0			0.2	-0.00926384	-0.00445301	0.010158	-0.00554864	-0.00608674	0
0.4											0			0.4	-0.00666571	0.0205537	0.00355087	0.00229149	-0.00540382	0
0.6											0			0.6	0.0122228	0.00673352	-0.00678451	0.00327673	0.00314314	0
0.8											0			0.8	0.0194842	-0.00371449	-0.000654658	-0.00643189	0.0085803	0
1											0			1	-0.00627106	0.00422002	0.00972828	-0.00285792	0.00945903	0
1.2											0			1.2	-0.00789332	-0.00616788	-0.00293521	0.00142679	0.00311614	0
1.4											0			1.4	-0.00701423	-0.00645132	0.00851793	-0.00849548	0.000419319	0
1.6											0			1.6	-0.00496697	-0.00556081	0.00254557	0.0103093	-0.00855955	0
1.8											0			1.8	0.0124323	-0.0212905	-0.0177652	0.00510154	0.000354988	0
2											0			2	-0.0103019	-0.0108813	-0.00750163	-0.0214612	0.0130972	0
2.2	-0.0175337	-0.0365413	-0.00426855	0.0326194	0.0525438	0.0284851	0.018244	-0.0165099	0.0442677	0.0224801	0			2.2	-0.0148516	-0.000684553	-0.000670714	0.0096088	0.00724519	0
2.4	0.00849033	-0.0371783	-0.0228692	0.026746	0.0234641	0.0293169	-0.0413601	-0.000929253	-0.0019709	-0.00185397	0			2.4	-0.0106539	0.0199789	0.00185505	0.00503115	-0.00152731	0
2.6	0.0211383	-0.0134641	0.00769841	-0.00164097	-0.0125817	-0.00137835	-0.0492671	0.0122231	-0.0286385	-0.0351818	0			2.6	-0.0184665	0.025135	0.00568005	-0.0107189	-0.00813308	0
2.8	-0.015301	-0.0285599	0.0309183	0.0324467	0.0338435	-0.00413866	0.0823489	-0.00356535	-0.0022071	0.0202651	0			2.8	-0.0112139	-0.00600437	-0.00175956	0.0128286	0.00305723	0
3	0.0257107	0.0153244	0.0295007	0.0395393	-0.0121178	-0.00783542	0.0115692	0.049323	-0.00509455	0.0188296	0			3	0.01474	-0.00399764	-0.00538933	0.00490479	-0.00726099	0
3.2	0.0186851	0.0479758	0.0203165	-0.0123341	-0.031213	0.0170202	-0.0175699	0.0294647	-0.0283289	0.0187707	0			3.2	0.0161592	-0.00361475	0.00679337	-0.00854745	-0.00163797	0
3.4	-0.0105098	0.0245943	0.00963358	0.000353347	0.000310635	0.0211534	0.0149352	0.0226103	-0.0170144	0.00570128	0			3.4	0.0141321	-0.00455135	0.000765613	-0.0139832	0.0093428	0
3.6	0.0047757	-0.0141424	-0.00321174	0.0366358	0.00289793	-0.00587904	0.0279764	0.00683398	0.0038734	-0.0272204	0			3.6	0.00958041	-0.00321833	-0.0197178	0.00650071	-0.0108293	0
3.8	0.0157884	-0.032403	-0.00834867	-0.00351999	0.00180711	-0.0122124	0.0406336	-0.0594573	-0.0130505	-0.031698	0			3.8	0.00165623	-0.00146087	-0.0325302	0.00945817	-0.0091626	0
4	0.00204129	-0.0164028	0.00337625	-0.0136507	0.0371743	-0.00988027	0.02281	0.0285649	-0.0206166	-0.0116853	0			4	-0.00942201	0.00168454	0.00177639	0.000789819	-0.00427177	0
4.2	0.000876672	0.0412069	0.00399716	-0.0164267	-0.00741452	-0.00287709	0.0670872	0.0645334	0.0137484	0.0528491	0			4.2	-0.00465192	0.0189283	0.0229991	0.0168125	-0.000846598	0
4.4	0.0149146	-0.00298749	-0.0661186	-0.0354772	-0.0313776	0.0507792	-0.0319952	-0.0343827	-0.0147572	0.023405	0			4.4	0.0191293	-0.0153793	0.00396099	-0.00428133	0.00826929	0
4.6	0.0100441	0.0188743	-0.0259125	-0.005256	0.0100706	0.0425515	-0.0284862	-0.0359714	-0.0294102	-0.00541999	0			4.6	0.0234664	-0.00740815	0.0197057	-0.0184889	0.0155709	0
4.8	-0.00336827	0.0294696	0.0303854	-0.000272938	0.0173989	-0.00626487	0.00352934	-0.0110316	-0.000512484	0.00399441	0			4.8	0.000165524	0.00889485	-0.00237897	0.00687493	0.0133954	0
5	-0.0210926	-0.0301376	-0.00140659	-0.0244687	-0.0089013	-0.0157487	-0.0610777	-0.0321383	0.0234576	0.0116871	0			5	-0.0154918	0.000454491	-0.000255208	0.0264828	0.014	0
5.2	-0.0508797	-0.0154993	-0.0101823	0.0105628	0.00558916	-0.00558768	-0.0233192	0.00987881	0.0380578	0.0176886	0			5.2	-0.0106526	-0.00106195	0.0155458	0.00464076	0.00172956	0
5.4	-0.0355316	-0.0152285	-0.0249911	-0.00523288	-0.0185908	0.00647553	0.0640104	-0.004451	0.0319672	0.0027688	0			5.4	-0.0136668	0.00126054	-0.0064028	-0.00156244	-0.0051982	0
5.6	0.0240655	0.00102608	-0.00339547	-0.0350941	-0.0261505	-0.00649136	-0.0215156	-0.00781363	-0.0327724	0.0065067	0			5.6	-0.00723596	-0.00492289	0.0196023	-0.00747416	0.00147905	0
5.8	-0.00107988	-0.00402408	-0.00943158	0.0134857	-0.00579324	-0.0427246	-0.0418968	-0.0397556	0.0146982	-0.00658506	0			5.8	0.00580144	0.00363743	-0.000834123	-0.00802296	-0.00634934	0
6	-0.00513342	-0.0111606	0.0326492	0.0553063	0.0037488	-0.0242183	-0.0274896	-0.0341079	0.0322842	-0.0282652	0			6	-0.00504946	0.00904856	-0.0131636	-0.0197924	-0.0188796	0
6.2	0.0166623	-0.0174912	0.0263931	-0.000325228	0.00163293	0.0150763	-0.0176898	0.0270171	0.00870082	-0.0355261	0			6.2	0.0079765	-0.0114013	-0.00234018	-0.0161274	-0.013378	0
6.4	-0.0172256	-0.0207235	-0.0450107	-0.0353717	0.00439111	0.00258036	0.0212261	0.0447965	0.0125461	-0.0330614	0			6.4	0.0141165	-0.0038581	-0.0080572	-0.00343092	0.00865858	0
6.6	-0.0313679	0.00630622	-0.0115514	0.0357173	-0.00529043	-0.0127839	-0.00832568	9.29541e-05	-0.0452152	-0.0256619	0			6.6	-0.00853213	0.0240839	0.00716202	0.016561	0.02221	0
6.8	-0.00942215	0.00023124	-0.064473	-0.012955	-0.0275081	-0.0111659	-0.0883094	0.00434443	-0.0267979	-0.00704372	0			6.8	0.00258212	0.0126303	0.0207716	0.0304625	0.00521994	0
7	-0.0099185	-0.0351696	0.0205895	-0.0158367	-0.0250644	-0.056649	-0.0691073	0.0149682	0.0160001	0.00612535	0			7	0.0354152	0.0212314	0.0130733	0.0114292	0.00705058	0
7.2	-0.0409937	-0.0142646	0.054079	0.00351788	0.00944899	-0.0128245	0.0132794	0.0195526	-0.0371784	-0.00334557	0			7.2	0.0153229	0.0219677	0.0381306	0.000444812	0.0268338	0
7.4	-0.0366356	0.00318358	0.001592	0.00169745	0.0117489	0.0339334	0.080895	-0.00269213	-0.0341606	0.00688525	0			7.4	0.0161471	0.0157669	0.0433924	0.020765	0.0309954	0
7.6	0.0128571	-0.0178926	-0.00492004	-0.00675708	0.00059524	-0.00705846	0.0446631	-0.0387385	0.0253819	0.00272197	0			7.6	0.0250679	0.00665703	0.0463841	0.0328461	0.023717	0
7.8	0.0426748	0.00364202	0.00515939	-0.00344342	0.00928202	-0.0319632	-0.032088	-0.0471706	-0.00963509	-0.0224713	0			7.8	0.0306224	0.0140501	0.0456173	0.0308907	0.0273545	0
8	0.0337553	0.0443993	-0.0380137	0.00628782	-0.0154862	0.00853586	0.027644	-0.0301031	-0.0140161	0.0199541	0			8	0.0382961	0.0356868	0.0538189	0.0335896	0.0331399	0
8.2	0.0219776	-0.0184324	-0.00365956	-0.0319457	0.0267803	0.048904	-0.00517395	0.0121256	0.0377734	-0.0271964	0			8.2	0.0408975	0.0251684	0.0598667	0.0351246	0.0553781	0
8.4	0.0152977	0.0100935	0.0176797	0.0125607	0.0106268	0.0359277	-0.00529239	0.0415103	-0.0140551	0.0223376	0			8.4	0.0357274	0.0293338	0.0358566	0.0726526	0.0495919	0
8.6	0.00226566	0.0456878	0.0385186	0.00128659	-0.00889695	-0.00708657	0.0506992	0.0527263	-0.039648	0.0363175	0			8.6	0.0242518	0.0443958	0.0224555	0.0321134	0.0398898	0
8.8	-0.0121455	0.0165921	0.0151347	-0.0256523	0.00866207	-0.00778609	0.0167103	0.00743609	0.0288157	0.0263606	0			8.8	0.0319447	0.0251091	0.0519462	0.024906	0.0515192	0
9	0.00997366	-0.0134636	-0.00815748	0.00803746	0.00781169	0.0262003	-0.0379951	-0.0117483	0.0384996	0.0377039	0			9	0.0346149	0.006693	0.0724072	0.0396255	0.0504546	0
9.2	0.0317606	-0.0284565	0.0275942	-0.0102382	-0.00395262	0.0175189	0.0141795	0.0677836	-0.0171474	-0.0136347	0			9.2	0.0249831	0.0169964	0.069854	0.0299199	0.0516828	0
9.4	-0.0458295	-0.0398997	-0.0561995	-0.0349733	0.030635	-0.0151907	-0.0310557	0.0243978	0.0560381	-0.000209942	0			9.4	0.034079	0.0383908	0.0458401	0.0359502	0.0589618	0
9.6	-0.0202674	0.000665839	0.0129738	0.00461748	0.0345915	-0.0177847	0.0125236	-0.0712252	-0.0157307	-0.00844515	0			9.6	0.0467942	0.0426517	0.0549855	0.0571809	0.058376	0
9.8	0.00226709	-0.0340278	0.0139721	0.0494633	0.0043597	-0.044779	0.0168756	-0.0854217	-0.0220704	-0.00314148	0			9.8	0.0423131	0.0288582	0.0737416	0.0392112	0.0638771	0
10	0.00336439	-0.0169504	-0.0266365	0.0287307	0.00215926	-0.00378862	0.0116819	0.00748485	-0.0240278	0.013343	0			10	0.0441392	0.0336745	0.0826112	0.0656112	0.0717869	1
10.2	0.00238283	0.0523295	-0.00232217	-0.0133015	0.0208317	0.0348074	-0.0166512	0.0591055	-0.0224007	0.0113138	0			10.2	0.091829	0.116323	0.12932	0.132465	0.0840308	1
10.4	-0.00769305	0.0224808	0.0224109	-0.00292966	0.0103373	-0.00943916	-0.0603235	0.0123072	0.0462831	-0.00915867	0			10.4	0.127891	0.163614	0.141577	0.132385	0.102329	1
10.6	-0.000782957	-0.0269243	0.013005	0.0105205	-0.0179418	0.00538735	0.012224	-0.00917175	0.0277827	-0.0289629	0			10.6	0.13422	0.124896	0.135723	0.104581	0.103133	1
10.8	-0.0133494	0.0197209	0.00573057	-0.0454162	-0.0258005	0.00486892	0.00381131	-0.0478148	0.0123987	-0.0167531	0			10.8	0.116662	0.105103	0.13172	0.106347	0.0823909	1
11	0.0186763	0.0276195	-0.0120621	-0.00587996	0.00589002	0.0117004	0.00628564	-0.0139887	0.00514554	-0.00792428	0			11	0.0845639	0.109896	0.105336	0.0818597	0.0755636	1
11.2	0.0176299	0.0167909	-0.0316449	0.0291791	-0.0152624	0.0498192	0.0485401	0.0703467	0.0100158	0.00780799	0			11.2	0.0899072	0.0859562	0.0763237	0.0568075	0.0777275	1
11.4	0.0004024	0.00683615	-0.0393533	-0.00592897	-0.0135132	0.0438051	0.0509434	0.0561172	0.00770975	0.0190241	0			11.4	0.0534445	0.068309	0.0539226	0.0554401	0.0463818	1
11.6	-0.00972921	-0.00633641	-0.00945111	0.00702122	0.010135	0.00195586	-0.00741	0.00854814	0.00758205	-0.00527352	0			11.6	0.0118757	0.0699653	0.0459242	0.0543288	0.0272567	1
11.8	-0.0233684	-0.0134089	0.0359219	0.0706422	-0.0249166	0.00430365	-0.0339567	0.0351986	0.0281907	-0.0209759	0			11.8	0.0232089	0.0657576	0.0491928	0.0268471	0.021351	1
12	0.0164958	-0.0307282	0.0259753	0.00799178	-0.00425214	0.00398464	0.0164146	-0.0262801	0.0202758	0.0238219	0			12	0.0290011	0.0322505	0.0380267	0.0446357	-0.00030184	1
12.2	0.0173313	-0.0187549	0.038388	-0.0238653	0.0133945	-0.0145055	0.0156693	-0.0427148	-0.0175698	-0.0113392	0			12.2	-0.0146904	0.00846339	0.0193963	0.0443794	-0.00765034	1
12.4	0.0149132	0.0215178	0.029531	0.0196126	-0.000491348	-0.00270416	0.00363207	0.0209033	-0.0199033	-0.00884966	0			12.4	-0.0173057	0.0108928	0.0180343	0.019862	-0.0171198	1
12.6	0.0062531	0.011923	0.00830196	-0.023267	-0.0231255	-0.000379632	-0.00613466	-0.0078226	-0.0107062	0.00629337	0			12.6	-0.00553955	0.00693741	0.0146046	0.00457292	-0.0311514	1
12.8	0.00255378	0.00181047	-0.000776608	-0.0302026	-0.00903735	-0.0188763	-0.0448257	-0.0142749	-0.00549481	0.0124628	0			12.8	-0.0156132	-0.00801083	-0.00970264	-0.0102958	-0.0307311	1
13	0.00987291	0.036272	0.00320052	0.0448344	0.0122206	-0.0316666	-0.00790527	0.030311	-0.0304183	0.0181125	0			13	-0.0305355	-0.0211284	-0.0206305	-0.012181	-0.0413576	0
13.2	0.00686215	0.0257595	0.00646528	-0.0111372	-0.0139326	-0.0284216	0.101176	-0.0534874	-0.0650184	-0.00381408	0			13.2	-0.0417414	-0.0131582	-0.0261834	-0.00731917	-0.0396862	0
13.4	0.0189482	-0.0219442	-0.0182303	-0.0358144	-0.0119969	0.00356308	-0.0273232	-0.0239759	0.0282264	-0.010616	0			13.4	-0.0401057	-0.0166895	-0.0138002	-0.00347583	-0.0485068	0
13.6	-0.00510296	-0.0043133	-0.0246395	0.0174063	0.0182805	-0.0106854	-0.00329225	0.00394208	0.0274761	-0.03162	0			13.6	-0.0260269	0.00914547	-0.00998645	-0.00775735	-0.0450627	0
13.8	-0.024867	0.038689	-0.0246168	-0.010219	0.0293552	0.00186541	0.00297086	0.0200246	0.0225697	0.00884011	0			13.8	-0.0114343	0.00926743	-0.000984272	-0.00171666	-0.0348454	0
14	-0.0240839	0.0125798	0.00842756	-0.00704513	0.0115685	-0.0014015	-0.0243225	0.0205014	0.000978676	0.00431916	0			14	-0.0265904	-0.00043215	-0.0261755	-0.0174846	-0.0467995	0
14.2	-0.00108897	-0.0190937	0.0140115	0.0363785	-0.0127977	-0.0113036	-0.00263236	0.0521664	-0.025614	-0.0184994	0			14.2	-0.0256853	-0.0115541	-0.022453	0.00063718	-0.0563496	0
14.4	0.02546	-0.00792656	-0.0152939	-0.0006616	-0.00797521	0.0194764	0.00795276	0.0851251	0.0172773	0.0159322	0			14.4	-0.0171835	-0.0220233	-0.0291807	-0.0213298	-0.049788	0
14.6	0.00536068	-0.0473737	0.0238605	-0.0174665	0.0304115	0.0249043	-0.00398076	0.00874772	0.0449138	-0.00309677	0			14.6	-0.0275026	-0.0114649	-0.0317541	-0.0492812	-0.0649103	0
14.8	-0.0253899	-0.0306707	-0.0271232	0.0183718	0.0236475	0.0381613	0.00562787	0.0130763	0.00110431	0.0384981	0			14.8	-0.0227608	-0.0140242	-0.0416911	-0.0268836	-0.0628882	0
15	-0.0135334	0.0138106	-0.0163638	0.00691969	0.00781266	0.00107982	-0.0284008	-0.00741576	-0.0145276	0.0253298	0			15	-0.0303257	-0.0268261	-0.048388	-0.0277839	-0.0456472	0
15.2	0.0168769	-0.0108998	0.0319493	0.016106	0.00120257	0.00243965	-0.0149969	-0.0390333	-0.0350636	-0.00668145	0			15.2	-0.0221756	-0.0123956	-0.015179	-0.00888854	-0.0469297	0
15.4	0.0323967	-0.0115884	0.0116044	0.0184096	-0.0293068	0.00305536	0.0355089	-0.052921	-0.0329799	0.00990992	0			15.4	-0.0129071	-0.00304485	-0.0178046	-0.00686508	-0.0470127	0
15.6	0.0196195	0.0350248	-0.0281501	-0.00705487	-0.0304887	-0.029931	0.0316211	-0.0483748	0.0377495	0.00394673	0			15.6	-0.00441466	6.47581e-05	-0.0271613	-0.0255516	-0.0371377	0
15.8	-0.0150079	0.0110182	0.00187973	-0.00631348	0.0126645	-0.0113216	0.0137214	-0.0147589	0.0498782	-0.0488116	0			15.8	-0.00414343	0.00625975	-0.0303654	-0.0250118	-0.0355913	0
16	-0.0327601	-0.0181495	0.0246817	-0.0199465	-0.0342334	0.0221758	0.0668801	0.0200366	-0.0660981	-0.0128588	0			16	-0.013658	-0.00669601	-0.0211428	-0.00767676	-0.0424659	0
16.2	-0.0117188	0.0141485	0.00948173	0.0107923	-0.0010922	-0.00525085	0.0603345	0.0270183	0.0394644	-0.0025219	0			16.2	-0.0300546	-0.0123024	0.0104079	-0.0178686	-0.0225039	0
16.4	-0.0125109	0.0109015	-0.0186002	-0.00220434	0.020078	-0.00442148	0.0061989	-0.0268924	-0.0149056	0.00547287	0			16.4	-0.0110938	-0.0138699	0.00635692	-0.0176753	-0.0118705	0
16.6	-0.0225077	-0.00280793	-0.00465494	-0.0393217	-0.0271494	-0.0218315	-0.0216582	-0.0871945	-0.0528189	0.0171309	0			16.6	-0.00812113	-0.0222503	-0.0116477	-0.00602801	-0.036363	0
16.8	-0.0191988	-0.00119518	0.00885144	-0.03541	-0.0348317	-0.0320507	-0.0240942	-0.08186	0.0190491	-0.00372516	0			16.8	-0.0189475	-0.0140464	-0.00927176	0.0119479	-0.0282415	0
17	0.00526552	0.00833866	-0.0234094	0.0179475	0.0273354	-0.00316873	-0.0176344	-0.0153151	0.00878004	-0.0248677	0			17	0.00130446	-0.00472766	-0.0136431	0.00041477	-0.0250616	0
17.2	0.0313367	0.0407558	-0.0238086	0.0530048	0.0303069	-0.0123571	-0.0263972	0.0507437	-0.0345393	-0.00173062	0			17.2	-0.0142416	-0.0257377	-0.00156307	-0.00317096	-0.0155275	0
17.4	-0.017356	0.0406358	0.0358983	-0.017711	-0.0264486	-0.00254259	-0.128648	0.0653744	-0.0286101	-0.0110027	0			17.4	-0.0100881	0.00733735	-0.00489052	0.0131851	-0.000913663	0
17.6	-0.0222773	-0.00939622	-0.00124321	-0.0373178	-0.0281308	0.00318368	-0.114566	-0.0162878	-0.0200973	-0.00325206	0			17.6	0.0153061	0.0131898	-0.00529431	-0.00251767	0.0119805	0
17.8	0.0433431	-0.0382198	0.0107077	-0.0346752	-0.037244	0.000789697	-0.00313417	-0.0216337	-0.00695398	-0.0100567	0			17.8	-0.0187724	0.000553982	0.00193753	-0.00336856	0.0161493	0
18	0.0551091	-0.00879953	0.0402996	-0.00136488	-0.00631657	-0.0220495	0.0264037	0.0450535	-0.0152055	-0.00963928	0			18	3.33093e-05	0.00404362	-0.00571725	-0.0183925	-8.90215e-05	0
18.2	0.0160412	0.0167404	0.0106463	0.0313626	0.040878	-0.0107766	0.0469211	0.029342	0.00514336	0.0063965	0			18.2	0.00092	0.00258185	0.00221988	-0.0055118	0.0162523	0
18.4	0.0182517	-0.000772228	0.00223384	0.0199774	0.031628	0.0412741	0.0871239	-0.0214974	0.0585474	0.0104006	0			18.4	-0.0061248	0.00893303	0.00884527	0.00643001	0.0101648	0
18.6	0.0228154	0.0040838	0.0254014	0.040344	0.0516216	0.0315859	-0.0447007	0.0424599	0.0154939	0.0224995	0			18.6	-0.0192501	-0.00102727	-0.00223313	0.00395883	-0.000696566	0
18.8	0.0250126	0.0317591	-0.0319061	0.0488955	0.04563	0.0513278	0.00796548	0.00515415	0.00258663	0.0281535	0			18.8	-0.018842	0.00857794	0.00243954	-0.0068013	0.00572435	0
19	-0.0403295	0.0359475	-0.00812475	0.0586124	0.0146927	0.0379219	-0.00207122	0.028453	0.0272973	0.0145312	0			19	0.0199986	-0.00193576	-0.00844961	-0.0225974	0.00358461	0
19.2	-0.0515115	0.0257623	0.0582199	0.0459042	0.00826421	0.00987035	-0.0554633	0.0447626	0.0148956	0.00411432	0			19.2	0.00910706	-0.0159294	-0.0207785	-0.00630599	0.00190255	0
19.4	0.00103434	-0.0140768	0.0125265	0.0162835	0.00737309	0.00134188	0.0338128	0.0273171	0.0232328	-0.012344	0			19.4	-0.000795595	-0.0298445	0.00173286	-0.00120782	0.00338314	0
19.6	0.0140211	-0.048335	-0.0466397	-0.0244272	-0.00421129	0.00051545	0.112101	-0.0186298	0.0318656	-0.00432521	0			19.6	0.00348854	-0.0250724	-0.000533763	-0.00797387	-0.0053955	0
19.8	0.00620737	-0.0221832	0.0223305	-0.0548284	0.00844668	-0.0140245	0.00569493	-0.0724871	-0.0393192	0.0353241	0			19.8	0.00853656	0.00376268	-0.0128126	-0.00480187	0.00259189	0
20	0.0444714	-0.0185191	0.0136409	-0.00958542	0.0166364	-0.0359545	0.00799557	0.0309491	-0.0312909	-0.00520008	0			20	0.00111825	0.0166344	-0.0187359	-0.00175221	0.0077176	0
20.2	0.00390902	-0.0254321	-0.00641997	-0.020871	-0.0389363	-0.0116895	0.00112119	0.050255	0.0199006	-0.00695603	0
20.4	0.00344564	0.0427619	0.00849943	-0.0460256	-0.0498003	-0.00472009	-0.0242936	0.0217934	0.0447406	-0.00646412	0
20.6	-0.0114401	0.0094669	-0.0266635	-0.0118035	-0.0457385	0.0142921	0.0168216	-0.0381595	0.0292103	-0.00814385	0
20.8	-0.0226495	-0.0176719	-0.0496438	0.00488493	-0.0210078	0.0116812	0.0301549	-0.0848665	-0.0293219	-0.00593769	0
21	0.0172687	0.0454796	0.00942837	-0.00699564	0.013733	-0.0346542	-0.0280062	-0.0388595	-0.0528488	-0.00622733	0
21.2	0.00829526	-0.031798	0.0224568	0.0318535	-0.0208013	-0.0167708	-0.00874357	0.0281292	0.0186252	0.00521512	0
21.4	0.0108086	-0.0108268	-0.0168105	-0.0262122	0.0134275	0.0235436	0.0010737	-0.00339314	-0.00185523	0.00358603	0
21.6	-0.0153907	0.000755143	-0.0253947	0.0153974	0.00316325	-0.0116438	-0.0261424	0.0375557	-0.00346591	-0.00619658	0
21.8	-0.00255807	-0.0158084	-0.0235739	-0.0274742	0.0160363	-0.0136094	-0.0507636	0.0167788	0.0307431	0.0281665	0
22	-0.00872363	0.0268291	-0.0335598	-0.0342687	0.0215681	-0.00512312	-0.0206136	-0.0221318	-0.00503884	0.038311	0
22.2	-0.043209	0.0181294	-0.00159757	0.0372939	-0.00390784	-0.00996577	0.0198047	-0.0226786	-0.0452068	-0.0245089	0
22.4	-0.0183509	-0.0652845	0.0470922	-0.00716575	0.016783	0.0112119	-0.000461279	-0.0241872	0.00623032	-0.0491552	0
22.6	6.27921e-05	0.027406	0.00608697	-0.0410995	0.0474083	-0.00311136	-0.0184951	0.0346458	0.00641165	0.0187031	0
22.8	-0.0536097	0.0107816	0.0289168	0.0123424	-0.00330992	-0.00270629	0.0245953	0.00285028	-0.0172823	-0.0218395	0
23	-0.0314172	-0.0299385	0.0078638	-0.001247	-0.0495964	0.0187791	-0.0156771	-0.0236152	0.0015276	-0.0174786	0
23.2	0.0177063	-0.0396721	-0.0101764	-0.0102774	-0.040989	0.022592	-0.000142918	-0.0253628	-0.0141545	-0.0272581	0
23.4	0.0279564	-0.00957469	-0.00361123	0.0187711	-0.00443283	0.00299958	0.0667382	0.00891262	-0.00149602	-0.0118503	0
23.6	0.021483	0.0175924	-0.00114076	0.0284303	0.0037255	0.000999853	0.0101095	0.0587524	0.042676	0.0289085	0
23.8	0.012149	-0.005388	0.0182947	0.0289865	-0.0154783	0.0253873	-0.0828903	0.0562601	-0.00752199	-0.021703	0
24	0.00810585	0.00848713	0.00730639	0.026889	0.00559221	0.0113108	0.0133713	0.0438517	-0.0230674	0.00106126	0
24.2	0.0264734	-0.00162958	-0.0591458	0.0146063	-0.0146725	-0.0397436	0.0105239	0.0269647	0.000634434	0.0142667	0
24.4	0.00607792	0.0212899	-0.0165895	0.0328668	-0.0247026	-0.0291141	0.0121132	-0.00528184	0.00471399	0.00255223	0
24.6	-0.0113271	-0.000200236	0.00251589	-0.00223795	0.00232726	-0.0031439	0.0150079	-0.0358093	-0.029437	0.0393743	0
24.8	-0.0169597	-0.0337319	-0.0271955	-0.0432375	0.0328764	0.00879052	-0.0133427	-0.0397174	-0.0372478	0.0482077	0
25	-0.0231982	0.0156784	0.014378	-0.0164984	0.027003	0.00782792	-0.0121227	-0.0304423	0.0337216	-0.0178727	0
25.2	0.00290047	0.0396684	0.0296844	-0.0154937	-0.00709961	-0.0330334	-0.00493854	-0.0361508	0.0699671	-0.019923	0
25.4	-0.0196665	-0.0120535	-0.015672	0.017982	0.0038547	-0.00307386	-0.0441731	-0.0329616	-0.0696898	-0.0184391	0
25.6	0.0199107	-0.0279797	0.00366935	-0.0158304	-0.0035633	-0.0278316	-0.056335	-0.0372752	-0.0242162	-0.0149924	0
25.8	0.0280114	0.0083794	-0.00201087	-0.0295543	-0.0160903	0.00147928	-0.0131895	-0.0317273	0.0058816	-0.00209533	0
26	-0.0108952	0.0215307	-0.00571494	-0.0200411	-0.00324672	0.00678571	0.0200199	-0.013824	-0.0174384	0.0206503	0
26.2	-0.0339892	0.000530802	0.00329115	-0.040548	0.0211112	-0.0215875	0.0241345	0.00406972	0.00501877	0.0131298	0
26.4	-0.0200745	-0.00448833	-0.0199792	-0.0396471	0.036178	0.0165861	0.0210036	0.0198146	0.0102671	-0.0232997	0
26.6	0.0258054	0.0052877	0.0236546	0.0284807	0.0382096	-0.0303463	-0.00986136	0.0359693	0.0198178	-0.00238148	0
26.8	-0.0156686	0.0335232	0.0142797	0.0745079	0.00481333	-0.0316571	0.0165289	0.049198	0.0464533	0.00600622	0
27	-0.0200387	0.00726306	-0.00127992	-0.00804804	-0.0320181	0.0313313	0.0212591	-0.0160393	0.00552374	0.00672507	0
27.2	0.0142496	-0.044229	0.0264389	-0.0316933	-0.0103477	0.0405039	0.025964	0.0036303	-0.0371047	0.00216933	0
27.4	0.0140154	-0.00990507	-0.00257728	0.0125487	-0.00127599	0.0312758	0.0340823	-0.00728883	-0.0227196	0.00256102	0
27.6	-0.00186263	0.0485254	-0.0326864	-0.00646558	-0.0239076	0.0330681	0.0242326	-0.0703027	-0.0048658	0.00432201	0
27.8	0.0120584	-0.0102589	0.0497793	-0.0347858	0.0082757	-0.025836	0.00661059	0.0343581	-0.0167882	-0.00963607	0
28	0.00563132	-0.0316838	-0.0249605	-0.0149873	-0.00231712	-0.0263406	-0.0444719	-0.00131879	-0.000646775	-0.0020274	0
28.2	-0.00347414	0.0135171	-0.031729	0.0232528	-0.0197139	-0.0123247	-0.00599626	-0.0447595	0.023893	0.012523	0
28.4	0.0242748	0.00641246	-0.0110781	-0.00864813	-0.0174662	-0.035074	0.0162795	-0.0233374	0.0525889	-0.0220576	0
28.6	0.0361063	-0.0632834	-0.0472179	0.00371059	-0.0106091	-0.0139052	-0.0140457	0.045561	-0.002389	-0.0437343	0
28.8	0.000345201	-0.0767297	-0.0453029	0.0351237	0.0142145	0.0307412	-0.0276181	0.0406486	-0.0460628	-0.00201753	0
29	-0.0387159	0.000873255	0.0308683	-0.019188	0.0286477	0.00738147	-0.0339003	-0.0197712	-0.00799059	0.0261525	0
29.2	-0.0463616	0.0333384	0.0263321	-0.0318395	-0.0147458	-0.0156315	-0.0636133	0.0576145	-0.0533509	-0.00894593	0
29.4	-0.0156751	-0.0306056	-0.0253339	-0.0133811	0.0275961	0.0140866	0.0108421	0.0687063	-0.0181144	0.00495233	0
29.6	0.0153727	-0.0138594	-0.0030619	0.0140243	0.0187048	0.0139887	0.0149801	-0.0493154	-0.00608953	0.00196264	0
29.8	-0.0166871	0.0187622	-0.015567	0.0248142	0.0074339	0.0314884	-0.0178439	-0.0178969	-0.00460394	-0.00405928	0
30	-0.0314858	-0.018859	-0.0415831	-0.00650395	-0.0110836	0.00944855	-0.00885058	0.0493507	-0.026078	0.0102342	0
30.2	-0.0109517	-0.0365177	-0.021068	-0.0128462	-0.0359526	-0.0354768	0.00632784	-0.0206146	-0.0352247	0.00405749	0
30.4	-0.0220692	0.0289816	0.0213909	0.0361537	0.000666473	0.00429694	0.0130293	-0.060517	0.0378423	-0.037074	0
30.6	0.0169983	0.0439563	0.0930621	0.00845905	0.0193867	-0.00203275	0.0474661	-0.0135673	0.0552598	-0.0369521	0
30.8	0.0290619	0.0110198	-0.0075806	0.0097837	0.00973238	-0.0639506	-0.0209282	0.023874	-0.0212997	0.0206923	0
31	-0.0154064	0.0450554	-0.000136301	0.00614975	0.0271221	-0.0165789	0.0160895	-0.0449788	0.0324294	-0.00317224	0
31.2	-0.00766458	0.0727056	0.0308714	0.00275842	0.0100032	-0.00930033	0.00356288	-0.0450931	0.008549	0.00839466	0
31.4	0.0407129	0.0293045	0.00445228	-0.00122783	-0.0223053	-0.0175679	-0.02407	-0.00508907	-0.0437724	0.0226026	0
31.6	0.0335827	-0.0248534	0.0220667	-0.00620558	-0.00999557	0.0611625	0.0544459	-0.0151184	0.0177289	-0.015137	0
31.8	0.00840579	-0.0334902	0.0377503	0.0141784	0.00386505	0.0608166	0.0563467	0.0211566	-0.0120703	0.0252494	0
32	0.0314522	-0.0106688	-0.0204824	0.000157365	0.0191115	-0.00458191	0.0281243	-0.0170517	-0.0186295	-0.00267531	0
32.2	0.0206731	-0.0238123	-0.0375033	-0.034241	0.0114428	-0.00887201	-0.0442058	0.0109544	0.0101035	-0.0206366	0
32.4	0.0121764	-0.0222765	-0.0286344	-0.00658449	-0.00712433	-0.0017306	-0.0294503	0.0257269	0.0274309	0.00407031	0
32.6	0.0102027	-0.00196644	-0.0248648	0.0389507	-0.00182477	-0.0026901	0.0330809	0.0185341	0.00379335	0.000839663	0
32.8	0.0255029	0.0295221	-0.00192855	0.00679171	0.0129413	-0.0117109	0.00654305	0.0191101	0.00715276	0.001937	0
33	0.0300086	0.0330935	0.0205158	-0.0470046	-0.00633861	-0.0121724	-0.0560016	0.0131344	0.0414029	0.0360448	0
33.2	-0.0584977	-0.0463481	-0.0156629	-0.00888218	-0.0290476	0.032843	-0.014068	0.00706288	-0.00659783	-0.0185556	0
33.4	-0.0610664	-0.0237028	-0.0233633	-0.0163177	0.0135829	-0.01181	0.00751422	-0.0621344	-0.000572465	-0.0544968	0
33.6	-0.0176102	-0.0154018	0.0107914	-0.0285862	-0.00923795	-0.0176527	0.0533604	-0.0373105	-0.0129641	0.0279643	0
33.8	-0.0143222	-0.0267769	0.0442132	0.000836118	-0.0143162	-0.0103832	-0.0077831	0.072764	0.0165083	0.0663175	0
34	-0.0429192	0.00220191	0.00418395	-0.00410851	-0.0322471	0.0186255	0.00990506	0.0820345	0.0275363	0.0219775	0
34.2	-0.0292402	0.0349456	-0.0311341	-0.020076	-0.0446664	0.0467908	0.0688718	-0.00364143	-0.0186649	-0.0178029	0
34.4	0.0204065	0.0226551	0.0131096	0.0255875	0.0430245	-0.00524729	-0.0738059	-0.00510832	0.000221169	-0.0241129	0
34.6	0.00939216	0.0207798	-0.0275421	-0.00374517	0.0286817	-0.0136304	-0.00451695	0.0268474	0.0302472	0.0169254	0
34.8	0.0377278	0.00683172	0.0452121	0.00552501	0.021076	0.032225	0.0168296	0.026941	-0.0516041	0.00137806	0
35	0.0414498	-0.0156107	0.030975	0.0135469	0.00213377	0.021016	-0.0147621	0.00213802	-0.0677667	0.00114668	0
35.2	0.0333034	-0.00641124	0.016047	0.00506178	0.00816599	-0.0177703	-0.00498712	-0.0325774	-0.0380248	0.00493335	0
35.4	0.0343369	0.021488	0.0372441	0.000590861	0.00826922	-0.0203203	-0.0204374	-0.0238993	-0.025596	0.00169104	0
35.6	0.0170415	0.0198912	0.0207328	0.0246082	-0.0241965	-0.0116481	-0.0464804	-0.0030112	0.014757	-0.0024396	0
35.8	-0.0104071	-0.00738428	0.0332808	0.0608813	-0.00321692	-0.0090097	0.00985671	-0.0544263	0.0595855	-0.0247113	0
36	-0.0266816	-0.0245633	-0.030178	0.00147959	0.00120828	0.0319917	-0.0736263	-0.0272822	0.0357868	0.0144092	0
36.2	0.00121389	-0.0263698	-0.0140077	0.00271521	-0.0193038	0.00579008	0.00223613	0.0134834	0.0602933	-0.00274127	0
36.4	-0.00535976	0.00936163	0.0104504	0.00478079	-0.00522812	-0.017046	0.0235718	0.00435644	0.0482203	-0.0257901	0
36.6	-0.0148425	0.0193529	-0.0102906	0.0106205	-0.00250518	0.0041121	0.0160086	-0.015828	0.00486071	-0.00392852	0
36.8	0.00162773	0.00293831	-0.0484238	0.0300216	-0.0175305	-0.00526239	0.0615758	0.00242622	0.00180809	0.0152576	0
37	-0.01258	0.014919	-0.0551653	-0.00477355	0.00723695	-0.0402954	0.0429741	0.0297558	0.0223713	-0.00820726	0
37.2	-0.0388386	-0.00186421	-0.00112619	-0.0419675	0.0161208	-0.00289076	0.0167587	0.0173846	0.0243906	-0.0108869	0
37.4	-0.0291017	-0.0251363	-0.0315326	0.000414008	-0.0131147	-0.00782781	-0.0360278	0.0221785	-0.0157607	0.0743766	0
37.6	-0.0105258	-0.0120181	0.003491	-0.0267699	-0.0212743	0.0248969	-0.0346891	0.0609452	-0.0110017	-0.00372619	0
37.8	0.00360882	0.0385017	-0.0138161	-0.0275885	0.0197485	-0.00420822	0.0200205	0.0236136	-0.0112695	-0.0593534	0
38	0.00778045	0.0287053	-0.0305972	0.0111717	0.0210649	-0.00430798	0.0301428	-0.0307815	-0.0315303	-0.0147069	0
38.2	-0.0105062	-0.0337321	0.0328579	0.00896326	-0.00877144	0.0582522	-0.0141923	-0.0244828	0.00532163	-0.0142344	0
38.4	-0.0242801	-0.0165318	0.0349532	0.00766705	0.0235814	0.0093559	-0.0270665	-0.0120579	0.0385939	-0.0380759	0
38.6	0.0167883	0.0144592	0.0333076	0.00785012	0.0117694	0.00338089	-0.029998	0.0335781	-0.0724807	-0.0101614	0
38.8	0.0249967	-0.0356747	0.00186199	-0.0271336	0.0262029	0.00824286	-0.0277	-0.026843	0.0035567	0.00531594	0
39	0.0326192	-0.00124335	-0.0296226	-0.00249271	0.0234241	-0.00863532	0.0666564	-0.043124	-0.00810454	0.0484196	0
39.2	0.0123367	0.00373789	-0.0102535	0.0281964	-0.00735029	0.00476385	0.0654516	-0.0221877	-0.0462377	0.0262744	0
39.4	0.00220807	-0.0310952	0.0260542	0.0185623	-0.0189743	0.000380908	0.0119111	-0.00643406	-0.0299168	-0.0056575	0
39.6	0.0384205	0.0110689	0.0295939	-0.0129846	-0.0085636	-0.0357534	0.033721	0.0380232	-0.0496063	0.0278712	0
39.8	0.0241413	0.0105298	0.0233692	-0.0475416	-0.0114745	0.016907	-0.0398843	0.0488993	-0.0121688	-0.00861008	0
40	0.00622822	-0.00816083	0.00234732	0.0431261	-0.000941398	0.0306874	-0.033092	-0.0149014	0.0300009	0.0123588	0
40.2	-0.00587796	0.0461056	-0.00169259	0.0231274	0.0127527	0.00453734	-0.0100355	0.00406468	0.0225875	0.0206913	0
40.4	0.0103027	0.0545848	-0.0190338	-0.02309	0.0185782	0.00636514	0.0170642	-0.0191388	0.0526665	0.00982177	0
40.6	0.0115096	0.037196	-0.0189585	-0.0183969	0.00512714	-0.00261102	0.0333124	-0.0576548	0.0709962	-0.00780532	0
40.8	-0.0061292	0.00797116	0.0223241	0.0251507	-0.00221569	-0.011874	-0.00162932	-0.032657	0.0223945	-0.0108742	0
41	-0.00401291	-0.0637902	0.0395262	0.0521475	0.0112465	0.0160846	-0.0625908	0.00802513	-0.0173198	-0.0037341	0
41.2	-0.0220915	-0.0310513	0.0118009	-0.0309663	-0.0079738	-0.0129022	-0.0727688	0.0726693	-0.0280304	-0.041446	0
41.4	-0.0085554	-0.004178	0.0249106	0.0137588	-0.0217002	0.00974678	-0.0353928	0.0478831	-0.0243686	-0.0154829	0
41.6	-0.00132639	0.0165752	-0.0329827	0.00175993	-0.00369414	-0.021221	0.00352432	-0.0291275	0.0194109	0.0140457	0
41.8	-0.0182617	0.0207013	-0.0471195	-0.015776	0.0201487	-0.0405171	0.018681	-0.0192353	0.0168903	0.00992378	0
42	-0.0231989	-0.0199432	-0.0219608	0.0108651	0.00902719	-0.0259594	0.00176604	0.0171492	-0.019239	-0.00925019	0
42.2	0.00565127	-0.0300636	-0.0208866	0.0124618	-0.00927597	-0.0171057	0.00396154	0.0066921	-0.0124267	-0.0209762	0
42.4	0.0267349	0.0377235	0.0183542	0.0102387	0.00479491	0.0181432	0.0459483	0.0321135	0.00788722	-0.00582619	0
42.6	-0.00240164	0.0144432	-0.00688104	0.0108708	-0.0159803	0.0220844	0.00500332	0.013822	0.0101619	0.0336586	0
42.8	-0.00989521	0.0221565	0.0202275	-0.0338659	-0.00989914	0.000375685	0.0188972	-0.0749353	-0.0205725	0.0289965	0
43	0.00416782	0.0264102	0.0295229	0.0013915	-0.00858512	-0.00935706	0.0263378	-0.0463193	-0.0210698	-0.00482219	0
43.2	0.00517409	-0.0150033	-0.0072336	0.0282365	-9.39798e-05	-0.023264	0.0186044	-0.0252387	-0.00886969	-0.0202984	0
43.4	-0.00567607	-0.0165326	-0.00287525	-0.0155551	0.0129109	-0.00873439	0.00927243	-0.0390786	-0.0017207	-0.0189667	0
43.6	-0.00735823	0.0223931	0.0281286	-0.0381253	0.000450439	0.0367269	-0.0298521	0.0395696	0.0221768	-0.00615717	0
43.8	-0.000559381	-0.0190096	-0.0102491	-0.0347654	-0.00625452	0.00194531	-0.0543919	0.0698081	0.0339568	0.0288004	0
44	0.00819839	0.00364031	0.0245559	-0.00433082	-0.00273813	-0.0342011	-0.0198557	0.0310513	0.0128219	0.0147793	0
44.2	0.00669989	0.00631762	0.0267633	0.0159839	0.0343827	0.0289975	-0.0167714	0.0148121	-0.00706229	0.0329648	0
44.4	0.0133551	-0.0179259	-0.00962976	-0.00904354	0.0286282	0.0261883	-0.0228958	-0.00973048	0.00713629	0.0251946	0
44.6	0.0175922	-0.0286203	-0.0270532	0.0114933	-0.0055864	-0.0158744	0.00869902	-0.0189731	-0.00819431	-0.0224918	0
44.8	0.000210789	-0.0235185	-0.028436	0.0501915	-0.0282391	0.00779293	0.0423177	-0.0138019	-0.0402936	-0.0504688	0
45	-0.012373	-0.0210548	-0.0216986	-0.00464543	-0.0451317	0.0148772	0.017939	-0.0255447	-0.0095908	-0.0405884	0
45.2	0.00795991	-0.0165557	0.0182552	-0.00647078	-0.021415	-0.029354	-0.0188947	0.034153	-0.0044683	-0.00683075	0
45.4	0.00952988	0.0308222	-0.00656502	0.0323108	-0.0438686	-0.0463635	0.0501924	0.0211709	-0.0333316	0.000803945	0
45.6	-0.0161981	0.011055	-0.0290485	-0.0088884	-0.0011974	-0.0141752	-0.00509852	-0.0569752	-0.046062	-0.00975564	0
45.8	-0.0148098	-0.0151066	-0.0180975	-0.0100893	0.0288257	-0.0124243	-0.0487853	-0.049581	-0.00209852	-0.0128009	0
46	0.00820594	0.00272139	0.0141731	0.00190025	-0.00621047	-0.0256991	0.00790492	0.0265309	0.0443226	0.00235352	0
46.2	-0.00503322	0.019992	0.00842103	-0.0361987	-0.00439193	-0.011214	0.0218445	0.0247171	0.0340729	0.0228405	0
46.4	-0.0291119	0.0243266	-0.0306532	-0.00330775	0.0416415	-0.00673695	0.00151989	-0.0239699	0.0165285	0.0257416	0
46.6	0.0135394	0.000612375	0.0725956	-0.0191296	0.0151914	0.0308875	0.0345881	0.0302228	0.0268614	0.0197696	0
46.8	-0.000841281	-0.0114907	-0.00118553	-0.010958	0.0379977	0.0351655	-0.0160645	0.00821368	-0.0299274	0.0464862	0
47	0.00551832	0.016449	-0.00605409	-0.0121136	0.0190641	0.0428583	-0.0207751	0.00601642	-0.03832	0.0121585	0
47.2	0.0213209	0.016753	0.0203546	0.0239322	0.010741	0.041962	0.0366309	0.0245362	-0.00953982	-0.0102921	0
47.4	-0.00533552	-0.0143221	-0.0011513	0.0608638	0.0264184	-0.00718271	0.0241582	0.00882368	0.0280597	0.0103069	0
47.6	-0.0187187	-0.00721775	0.0341543	0.0124188	-0.0111308	-0.0272852	-0.00192637	0.00489999	0.0619219	0.0023415	0
47.8	0.0101079	0.00817575	0.0146813	-0.00830318	-0.0128796	0.0497431	0.0731004	0.00169895	-0.00856388	0.0111671	0
48	0.00402796	-0.00281622	0.0172964	0.00741195	-0.0243077	0.0185461	-0.0511514	-0.0462455	-0.0121494	-0.0200873	0
48.2	-0.0244347	0.0109664	0.0147173	0.0186096	-0.0390017	-0.0284446	-0.0172259	0.0101056	-0.0149991	-0.0221988	0
48.4	0.00279858	0.0176893	-0.0151814	0.0190902	-0.00848419	-0.00520918	-0.0264001	0.00561129	-0.0128067	-0.0193218	0
48.6	0.039129	0.0126032	-0.043064	0.0174381	0.00974988	0.028178	-0.0623474	-0.033965	0.0130137	-0.00931053	0
48.8	0.025671	0.0123678	-0.00521928	-0.00961166	-0.00817829	0.0119156	0.0162079	0.00106001	0.0514479	0.0124056	0
49	0.00262772	0.00269661	0.0509587	-0.039135	0.00363766	-0.00245055	0.0155016	0.00302676	0.0619925	0.00842258	0
49.2	-0.0147399	-0.00109889	-0.0328581	0.00987632	0.00187772	0.0300439	-0.0137611	0.000812905	-0.0132076	0.00583043	0
49.4	0.0265533	-0.0202281	-0.0293066	-0.0297258	0.00284301	0.0164037	0.0339588	0.076008	0.00169456	-0.0390524	0
49.6	-0.00357624	-0.011994	-0.0166687	-0.00576902	0.0232346	-0.00164112	0.0718996	0.0166266	-0.0614131	-0.0153194	0
49.8	-0.0342828	-0.0176541	0.016706	0.011476	0.0137647	-0.0181301	-0.006426	-0.0389855	-0.0180219	0.024455	0
50	-0.009673	-0.0283153	0.022857	-0.0141141	-0.00857195	-0.0279142	-0.0553466	0.0103692	0.0589961	0.0111297	0
50.2	-0.0103934	-0.0056995	-0.0230451	0.0133309	-0.00866416	-0.0275003	0.0165464	0.0179337	-0.023108	-0.00343458	0
50.4	-0.023128	0.0102456	0.0200638	0.0272438	-0.0190566	-0.0475858	0.0254216	-0.0435947	-0.0237013	0.00689037	0
50.6	0.023454	0.0371506	0.00874929	-0.026575	-0.000237132	-0.025866	0.0122671	-0.0700115	-0.0302089	-0.00461699	0
50.8	-0.00390295	-0.00249955	-0.0162619	-0.0425229	-0.0265801	0.0280866	-0.0498689	0.0154832	-0.0304358	-0.00921848	0
51	-0.00883296	-0.00882497	0.00879952	-0.0295037	-0.0178075	0.00937713	-0.0528735	-0.0106351	-0.00539197	-0.00794266	0
51.2	-0.0041793	-0.000470811	-0.0142461	-0.0355024	0.0232659	-0.0208753	-0.029126	-0.0157536	-0.0249479	-0.00160304	0
51.4	-0.0128316	-0.0110855	-0.0488421	-0.0275167	0.0122795	-0.0134333	0.00656618	0.0485409	-0.0370621	-1.04376e-05	0
51.6	0.018816	0.0134738	0.0134535	0.0274466	-0.0288039	-0.00813807	0.0313901	-0.0082399	0.0354395	0.00120542	0
51.8	0.0132388	0.0274982	0.0155269	0.0512981	-0.00987879	0.0263132	-0.0912574	-0.0362003	0.0381693	0.0275025	0
52	-0.00548556	0.000330166	-0.0166119	0.00876231	0.026994	-0.0135143	-0.0145669	-0.0372432	-0.000199649	-0.00794049	0
52.2	-0.0107723	-0.046473	-0.0331578	0.00993332	0.0435155	-0.0204413	-0.0110355	0.0377617	0.0312396	-0.0317159	0
52.4	-0.0284832	-0.0295763	-0.0192383	0.0193581	0.0223386	-0.0138525	-0.0140961	0.0492856	0.0204632	-0.0366867	0
52.6	-0.0500805	0.00638036	-0.00497092	0.0151888	-0.0019378	-0.0313276	0.0497418	-0.00188932	-0.0222048	-0.0117784	0
52.8	-0.0291009	-0.00278245	-0.0113715	0.018408	-0.0190832	-0.0303461	0.0368566	-0.0121247	-0.0183544	0.050366	0
53	0.0222145	-0.00819888	-0.00821899	-0.0016497	-0.038498	-0.000334789	-0.0421858	-0.0220696	-0.0120893	0.0642216	0
53.2	0.0302232	-0.00766095	0.0242148	-0.0299008	0.00292615	0.00454223	-0.0174405	-0.0305004	0.0135283	-0.0173445	0
53.4	0.0207367	0.0152139	0.0260491	-0.0191638	0.00332885	-0.00517275	0.00603402	0.0548649	-0.0515585	-0.0473865	0
53.6	0.00698654	-0.00539415	0.00198637	0.000567003	-0.00722534	0.0216724	-0.00654879	-0.0100549	0.0339911	-0.021611	0
53.8	-0.0107027	-0.0213874	-0.0065688	-0.00306477	0.00422842	0.0236903	0.000809926	-0.0477419	0.0432099	-0.000918251	0
54	-0.0155516	0.00348413	0.0229372	-0.000224287	-0.00578996	-0.00977199	0.0335414	0.0172122	-0.0353824	-0.00413984	0
54.2	0.010816	0.00231509	0.0360558	0.010699	-0.0285699	0.0035441	0.0343288	-0.00773296	0.0181045	-0.00365217	0
54.4	0.0434875	-0.0293395	-0.0132541	-0.016745	0.00497447	0.0478411	0.00310022	-0.0224629	-0.00180079	0.0126229	0
54.6	0.0230229	0.00673529	0.00148194	-0.00751487	0.00760418	0.0248974	0.0199085	0.0407006	-0.00599352	0.00670438	0
54.8	-0.0176044	0.00626632	-0.0161866	0.00140967	0.00423558	-0.00806995	0.0520596	-0.0252816	0.00259538	0.0278052	0
55	-0.0112174	-0.00824843	-0.00873451	0.0113398	0.015568	-0.0208008	-0.00691675	0.0109283	0.035246	0.0244779	0
55.2	0.00143802	0.0190253	-0.0189611	0.0287191	0.0381552	-0.0137602	-0.0532021	0.037105	0.0146247	0.0126039	0
55.4	-0.0146592	0.00191353	-0.0459506	0.00913685	0.0201467	-0.00459147	-0.0105995	-0.0167094	-0.0363181	0.0406941	0
55.6	-0.00527824	-0.0661246	-0.0035931	-0.0447478	-0.0240581	-0.00190791	0.0159398	0.0335705	0.00233279	0.0374761	0
55.8	0.0214767	0.0146211	0.00143421	-0.033321	0.0232749	0.0201825	0.0150207	-0.0166926	0.0290529	-0.0495586	0
56	-0.013859	0.0339815	0.0283003	-0.00430426	-0.0057483	0.0216071	-0.00302436	0.00574095	-0.0265391	-0.0203247	0
56.2	0.015371	0.0142901	0.0134508	-0.00660169	-0.0270258	-0.00302674	-0.034199	-0.0273619	0.0086822	-0.00221351	0
56.4	0.0359044	0.030982	-0.00294556	-0.00103557	0.0055677	-0.00195375	-0.00328169	-0.00572696	-0.00372332	-0.0015887	0
56.6	-0.0205244	0.0401547	0.0119304	0.0288028	0.0241374	0.006697	0.0481756	0.0537069	-0.0487403	0.00086716	0
56.8	-0.0443806	0.0230717	0.0159319	0.0379277	-0.0141613	0.0333063	0.0417771	0.0198314	0.00557686	0.00142336	0
57	0.00732217	0.0214949	0.00491142	0.00705857	-0.0355419	0.0867692	0.0122145	-0.00393082	0.0166681	0.0274243	0
57.2	-0.00923501	-0.0305279	0.00906661	-0.0136564	0.0367267	-0.0187301	-0.0315251	0.0351162	-0.0430273	0.0097888	0
57.4	0.00819228	-0.00493701	-0.00911174	0.01039	0.0116702	-0.0312594	-0.00970413	0.0655457	0.0581868	0.0584204	0
57.6	0.00424431	-0.00609314	2.09607e-05	-0.0278865	0.00895986	0.034093	-0.0353686	0.0409548	0.029604	0.0421709	0
57.8	0.0234633	-0.00906789	0.031667	-0.0131274	0.0294163	0.043228	-0.0140778	0.0290934	-0.00577713	0.0386228	0
58	0.0815533	-0.00844533	0.0496942	0.0377505	0.0199591	0.037409	0.0649161	0.0568589	0.0368984	0.0904964	0
58.2	0.0751885	0.00121891	0.0469193	0.0182079	0.037786	0.0653426	0.0541233	0.0505836	0.0253283	0.082147	0
58.4	0.0154237	0.112344	0.0272244	0.0615408	0.0716371	0.0373211	0.0425028	-0.00648665	0.0827622	0.0620628	0
58.6	0.0095719	0.00913948	0.0315241	0.0028733	0.0453024	0.0703565	0.123899	-0.0161602	-0.00293745	0.0751354	0
58.8	0.0296625	-0.00246786	0.0467874	-0.030006	0.0178121	0.0598058	0.0986247	0.0413606	0.0154668	0.107666	0
59	0.00548414	0.0281114	0.0769703	0.047849	0.0601404	0.031163	0.0096841	0.0960403	0.0501588	0.0993136	0
59.2	-0.0181029	0.0120404	0.0835166	0.0540108	0.0911095	0.0459217	0.0105897	0.0772937	0.0127606	0.0498714	0
59.4	0.014666	0.0292014	0.0391501	-0.0193379	0.0524011	0.0872005	0.0506708	0.0512672	0.0377426	0.042941	0
59.6	0.0448133	0.079311	0.0164369	0.018851	0.0388653	0.104276	0.0287684	0.0862927	0.116986	0.0937187	0
59.8	0.0395376	0.0798788	0.0800294	0.0344991	0.0793015	0.0711572	0.0561116	0.0640378	0.0443029	0.090504	0
60	0.125414	0.0772428	0.122097	0.0731196	0.0598107	0.050602	0.0506078	0.0830568	0.0653051	0.103633	1
60.2	0.192191	0.193535	0.192809	0.207549	0.0815326	0.115482	0.106648	0.150822	0.165093	0.11743	1
60.4	0.20365	0.303884	0.213042	0.228742	0.142647	0.210658	0.170438	0.185537	0.147217	0.147264	1
60.6	0.212304	0.244999	0.211603	0.172408	0.148565	0.249994	0.136146	0.161301	0.0887053	0.167565	1
60.8	0.199769	0.151641	0.231989	0.181533	0.120395	0.196406	0.12032	0.1425	0.113366	0.122331	1
61	0.142534	0.209569	0.170377	0.130205	0.142438	0.11341	0.221104	0.147508	0.0923919	0.0813719	1
61.2	0.14698	0.17772	0.156192	0.104729	0.135045	0.149404	0.143268	0.0774438	0.0791078	0.141948	1
61.4	0.117306	0.132133	0.121641	0.0543518	0.0892815	0.0820528	0.076895	0.0178985	0.103026	0.0744193	1
61.6	0.0535651	0.107771	0.120651	0.0473155	0.0932505	0.053133	0.0766386	0.0351344	0.045154	0.0444185	1
61.8	0.034829	0.116227	0.113355	0.0594661	0.0828973	0.0660047	0.100895	0.0715305	0.0122809	0.0476892	1
62	0.0386217	0.109067	0.0733627	0.0686139	0.0429267	0.0329401	0.066964	0.0579006	0.0576297	0.00036618	1
62.2	0.0179181	0.0460466	0.0549002	0.0922754	0.0422673	-0.00779691	-0.00497035	0.0237528	0.0627012	-0.00730458	1
62.4	0.0323288	0.0303459	0.0421445	0.0651052	0.0150846	-0.0365812	0.0536302	0.0438064	0.0587813	0.020604	1
62.6	0.0121361	0.0637164	0.0811592	0.0568153	-8.80659e-05	0.00567789	0.0691793	0.0825576	0.0340634	-0.0254363	1
62.8	-0.0208368	0.0424092	0.0490707	0.00493566	-0.039154	-0.0124707	-0.014302	-0.0278851	0.0025992	-0.043601	1
63	-0.0199768	-0.0174927	-0.0084782	-0.0256057	-0.0481022	-0.0200581	-0.00195924	-0.00821758	-0.0274911	-0.0173683	0
63.2	0.00350928	-0.0217269	0.0150176	0.0139917	-0.018423	-0.00169484	-0.00489138	0.0571737	-0.0272461	-0.00972087	0
63.4	0.00698775	0.0178637	0.0352571	0.0273412	-0.0114121	-0.0161159	-0.0609793	-0.0140485	-0.00423187	-0.0179647	0
63.6	-0.0151632	0.0273622	-0.0234935	-0.0197751	-0.025696	-0.000308732	0.0564474	0.00454216	0.00181918	-0.0226452	0
63.8	-0.0280074	0.0503722	0.0232948	0.00577734	-0.0111918	0.0651572	0.104017	0.0643926	0.0208997	-0.0680196	0
64	-0.0229898	0.0349546	-0.0125238	-0.0473972	-0.0134297	0.00833107	0.0102569	-0.0209572	0.024415	-0.0223099	0
64.2	-0.0166488	0.0343113	-0.00155856	-0.00159189	-0.036237	-0.0213144	-0.0303223	-0.0420359	0.0507322	-0.0112415	0
64.4	-0.0194835	-0.0234263	0.000310007	0.0073307	-0.0637212	-0.017412	-0.0191192	-0.0233682	-0.0199607	-0.00786774	0
64.6	-0.0286695	-0.0472407	-0.039062	-0.0557304	-0.082145	0.00802201	0.0226073	-0.0352072	-0.0670353	-0.00637976	0
64.8	-0.0275572	0.030438	-0.0449333	-0.0557712	-0.0573754	0.0458584	0.0539203	-0.0314901	0.020113	-0.0472073	0
65	-0.013867	-0.00465418	-0.054959	-0.0664856	-0.000456109	-0.0038719	-0.0324239	-0.0390672	-0.00305853	-0.0395904	0
65.2	-0.0247631	-0.0398649	-0.00659387	-0.00470645	-0.034343	0.00280324	0.00603979	-0.0244757	-0.00620478	-0.0421402	0
65.4	-0.00502368	-0.0543935	-0.0305896	-0.0457846	-0.030358	-0.0327521	0.0572004	-0.0393588	-0.0451899	-0.0548335	0
65.6	-0.00383676	-0.0407405	-0.0290609	-0.0917195	-0.0369908	-0.0292882	0.0287722	0.00807297	-0.0228853	-0.0313726	0
65.8	-0.00539124	-0.0229494	-0.00859824	-0.0424344	-0.052839	0.0110051	0.0116026	0.017877	0.0217843	-0.0384074	0
66	-0.00153762	-0.0192885	-0.0254696	0.00484411	-0.0253398	0.00874929	0.0186283	-0.0191745	-0.011455	-0.061129	0
66.2	-0.0257055	-0.0148207	-0.011775	-0.0283288	0.00610217	-0.0142273	-0.0366497	0.0155815	-0.035352	-0.0214676	0
66.4	-0.0273086	-0.0169006	0.0226805	-0.0415628	-0.00842643	-0.0115501	-0.0711343	-0.0258897	0.0129193	-0.037596	0
66.6	-0.0508428	-0.0283393	-0.0353473	-0.00631911	-0.0544763	0.00649992	-0.019291	-0.0496177	-0.0780563	-0.0895183	0
66.8	-0.0312781	0.0219431	-0.0512294	0.0362053	-0.0355448	-0.00408163	-0.0183432	0.0048217	-0.00585929	-0.038357	0
67	-0.00377669	0.00784779	-0.00230331	0.0112881	-0.0203852	-0.00398109	-0.0630677	0.0507474	0.0475688	-0.00067874	0
67.2	-0.018306	-0.0415654	-0.00692123	-0.00551684	-0.0446218	-0.0257286	-0.0526891	0.0229932	-0.00252757	-0.0134994	0
67.4	-0.0200211	-0.028731	-0.0500078	0.00911412	-0.0425811	-0.034461	0.00965717	-0.0277883	-0.00454084	-0.00572711	0
67.6	0.00993418	-0.0330153	-0.0130396	-0.0328608	-0.0062127	0.0364679	0.038043	-0.0323592	-0.000389616	-0.00510437	0
67.8	-0.0357328	-0.0224905	0.00149908	-0.00458555	0.00993565	-0.0248619	0.0219802	-0.00416067	-0.00302527	0.00316705	0
68	0.0115834	0.0369017	-0.031974	-0.0331015	0.0129562	0.0049918	-0.0269244	0.0214471	-0.0580281	-0.00272469	0
68.2	0.00680072	-0.00316654	-0.013655	0.000163829	0.0182803	-0.00377041	0.0301047	-0.0432747	-0.0357423	-0.0118085	0
68.4	-0.00865764	-0.0199973	0.00689951	0.0187135	-0.00801926	-0.0356435	0.0177904	-0.0368369	0.0149324	0.00068219	0
68.6	0.00753509	0.049952	0.0133669	-0.0207455	-0.0226472	-0.0454772	-0.0602957	0.0285036	0.0165622	0.0150103	0
68.8	-0.0104648	0.0458468	0.0414713	-0.0168073	0.0254337	-0.051952	-0.0305829	-0.012263	0.00198561	0.0139009	0
69	0.00932395	-0.0196765	0.0209074	-0.00713017	0.0445244	0.0133092	-0.013526	-0.0353858	-0.0133976	0.028677	0
69.2	0.027543	0.00192004	0.0121513	0.00613931	0.00799907	0.00105829	0.0533183	0.00309181	0.0125677	0.0364763	0
69.4	-0.00391148	-0.0116547	-0.013226	0.00466711	-0.011246	-0.00588779	-0.0143985	0.0615135	-0.000785624	0.0311015	0
69.6	0.0198039	-0.0210559	-0.036142	0.0281339	-0.00387292	-0.00548982	-0.0867426	0.0123243	-0.00701475	0.0166713	0
69.8	0.0362058	0.0159564	-0.00764722	0.0267713	0.0181291	0.00152169	-0.00564772	-0.0446463	-0.00768583	-0.0175006	0
70	-0.00178304	0.0120451	0.0282292	-0.00954301	0.0259826	0.0146536	0.101837	-0.0397369	-0.00997555	-0.0276162	0
70.2	-0.0058925	-0.0278998	0.0126061	-0.000222275	-0.00217703	0.0323626	0.0745777	-0.0304195	0.0324181	0.0267733	0
70.4	-0.0259673	0.0339835	0.0162391	0.0104674	-0.00770035	0.0872903	0.0216296	0.062757	0.063156	0.0417212	0
70.6	0.00806178	-0.00454195	0.00757687	-0.00232882	0.0230406	0.0161888	-0.023462	0.000239991	0.0419302	-0.0224872	0
70.8	0.00457241	-0.00886018	-0.0116917	0.0326591	-0.0122405	0.0298147	-0.0268673	-0.00634812	0.00244941	-0.0496895	0
71	-0.00845317	0.0216456	0.00353636	0.0104835	-0.0220038	0.0125717	-0.0141437	-0.0253965	0.00265162	-0.00700926	0
71.2	0.0126307	0.0249632	0.0132128	-0.0424277	0.0174784	-0.0184445	0.0120406	-0.0191846	0.00926445	0.00650508	0
71.4	0.0259413	0.0169294	-0.00199853	-0.0214612	0.00893992	0.0191843	0.0319681	0.0539817	-0.00865327	-0.0190925	0
71.6	0.013904	0.00712071	0.0114293	-0.00240752	-0.0155621	-0.0326788	-0.00249043	-0.0135423	-0.00271132	0.00965977	0
71.8	0.00706304	0.0167901	-0.0169678	0.00978255	0.0197358	-0.0136317	-0.0153851	-0.0136028	-0.0040365	0.0152599	0
72	-0.0158515	0.037737	0.0169665	0.045723	-0.00522996	-0.0265509	-0.0489302	0.0203545	-0.0125024	0.0368701	0
72.2	-0.00301291	-0.0209264	0.00552372	0.0526935	-0.0167482	-0.00575525	0.022694	0.0289979	-0.0295516	0.00896441	0
72.4	0.00707229	-0.00864021	-0.00124498	-0.014554	-0.0132484	-0.00198678	0.0589855	-0.00163306	-0.0653446	0.0129577	0
72.6	-0.0148209	0.0445147	0.0116898	-0.0336335	-0.00743245	-0.0247674	0.00522937	-0.0384264	-0.047102	0.0576781	0
72.8	-0.0120452	-0.0210328	-0.00986336	0.028992	0.0282408	0.00336637	0.0151615	-0.0350701	0.0100991	0.0223467	0
73	0.0247071	-0.0270488	0.0275658	-0.0147106	0.0209629	0.00499846	0.0159095	-0.00277673	-0.0339604	-0.0247261	0
73.2	0.0424271	-0.0309924	-0.026667	0.0180469	-0.0270233	0.00412755	-0.034523	-0.000923175	0.037914	0.0104849	0
73.4	-0.00963804	-0.0381832	-0.00578782	-0.0146903	-0.00766357	0.0217808	-0.0370156	-0.000495102	0.0210111	-0.0049538	0
73.6	0.00689197	0.0215575	0.00766787	-0.0294056	0.0142032	0.0227033	-0.0269693	0.0337503	0.0249554	-0.0198078	0
73.8	0.0244182	0.0499163	-0.0174455	-0.0122949	-0.0139617	-0.00666133	-0.0423037	0.00393803	0.0322263	-0.0355968	0
74	-0.0191409	-0.00678425	-0.012215	-0.00891411	-0.00829537	-0.0142735	-0.0198471	-0.0395056	-0.0151274	-0.0358527	0
74.2	-0.00111326	-0.0198349	0.00257217	0.0247068	0.0416736	0.0102047	0.054824	0.0391894	0.00772393	0.0243472	0
74.4	-0.00419249	-0.00227163	0.0300082	0.00500394	-0.00924581	-0.00926074	0.0456176	0.0395968	-0.00100982	-0.0342951	0
74.6	-0.00198138	0.00087517	0.030002	-0.0240221	-0.00787208	0.0278274	-0.058505	0.0535576	-0.0269401	-0.0307419	0
74.8	-0.00321297	0.0242204	0.00215391	0.0441848	0.0370016	0.0234518	-0.0458277	0.00424289	0.046131	0.00311194	0
75	-0.0211793	0.0255532	-0.00838352	0.0199292	0.0400607	-0.0105567	0.0417453	-0.00900652	0.0255641	0.00978112	0
75.2	-0.00448358	-0.016271	0.00746316	-0.0200128	0.00315941	0.0141049	0.0516244	0.0450837	-0.0370922	0.013578	0
75.4	0.0261947	-0.0301095	0.00587356	0.0443722	-0.00651957	0.0263113	0.0100668	0.0210696	0.0315207	0.03829	0
75.6	-0.0150523	0.00413581	-0.0150804	-0.0101496	0.00935944	-0.0449953	0.0116059	-0.0628649	0.0321496	0.0434986	0
75.8	-0.00342868	-0.0110899	0.00778728	0.0228345	-0.0230829	0.0157287	-0.0083018	-0.0212922	-0.0334405	-0.00934087	0
76	-0.0256426	-0.0119947	-0.0151095	0.0127251	-0.00133066	-0.0185532	-0.0237436	0.0112099	-0.0279083	0.0117048	0
76.2	-0.0105858	0.021602	0.0145277	0.0291636	0.0238733	-0.0104202	-0.0121467	-0.00819992	0.00761578	0.00995789	0
76.4	0.0212046	0.0247397	0.0346739	0.00595471	0.0356613	0.010027	0.0128319	0.0277651	0.0107497	-0.0121269	0
76.6	0.00653665	0.00826938	-0.0116992	-0.0532537	0.0250929	-0.0187538	0.00139527	0.0362779	0.00348768	-1.76636e-05	0
76.8	-0.00354124	0.00705734	-0.0103287	-0.0111304	-0.0326861	0.00540222	-0.017518	-0.0606787	0.0172798	0.000282802	0
77	0.0156835	-0.0420832	0.036636	0.00721141	-0.0519773	0.0135564	0.0420833	-0.0214991	0.0318178	-0.0151744	0
77.2	-0.00554435	-0.0268018	0.0284129	-0.031542	-0.0146806	0.00333649	-0.00548725	-0.00189978	0.0322532	-0.0196237	0
77.4	-0.00257282	0.0541836	-0.0337051	0.000242142	0.0244193	0.0192845	-0.00656859	0.00169342	0.0466609	-0.00898058	0
77.6	0.000780655	0.0352242	-0.0424432	0.00471709	8.99652e-05	0.0297973	0.0337261	-0.0293144	0.0264341	0.000981812	0
77.8	0.00799449	-0.0119999	-0.0134166	-0.0152818	-0.0345376	0.00956663	-0.0211511	-0.0378631	-0.00310038	-0.00107872	0
78	0.0235119	0.00168617	0.00153345	0.0074702	-0.00919269	-0.0137097	-0.0656363	0.00607246	-0.00822657	-0.00400095	0
78.2	0.00122347	-0.0196702	0.026051	-0.000868931	0.0224904	-0.0101311	0.0446873	0.01515	-0.0179308	0.0155058	0
78.4	-0.00331767	0.0194449	0.00876	-0.0213431	0.000356932	0.0118255	0.0272402	0.0128991	0.0142489	0.0398674	0
78.6	-0.00023123	0.0131913	-0.0017004	-0.0285156	-0.0162245	-0.00493781	-0.0369787	-0.00742906	-0.0175019	-0.012967	0
78.8	0.034626	-0.00953487	-0.0335071	0.0115202	-0.0159602	-0.0324928	-0.0241334	0.0469889	-0.0799817	-0.0380417	0
79	0.0116775	0.000624041	-0.0349618	0.00952502	-0.0113945	-0.0209261	0.0254541	0.0362225	-0.0191302	-0.0188611	0
79.2	-0.00409627	-0.0148011	0.0222792	-0.0215224	0.0024096	-0.0021288	0.00323333	-0.0159796	0.0492428	-0.00010789	0
79.4	0.0456698	-0.0413176	0.0535866	-0.00641296	0.00930661	-0.0202202	-0.0223692	0.0178277	-0.0109843	0.0114147	0
79.6	-0.00939248	0.0271684	0.0198269	-0.010425	-0.0134362	-0.0198041	0.0692124	-0.000472881	-0.0114897	0.012861	0
79.8	-0.0152077	0.0162771	0.0118291	-0.0014772	0.0013127	0.027949	0.0285916	-0.00207572	-0.0131641	0.0153634	0
80	-0.00941199	-0.0163132	-0.0284273	0.0145047	0.0126348	-0.0106231	-0.00271417	-0.0117135	-0.00477334	-0.0320552	0
80.2	-0.0205952	-0.0177966	-0.041719	0.0563631	0.0265624	-0.033544	-0.0351605	-0.0177897	-0.00926537	-0.0176823	0
80.4	-0.0349	-0.0384823	-0.00424323	0.0640312	0.0112843	0.00497077	-0.0474326	-0.00043166	-0.0296161	0.00632439	0
80.6	-0.0158949	-0.0166595	0.0312631	0.0350431	0.00719799	0.0502848	0.00317486	0.0218446	-0.00220868	0.00957131	0
80.8	0.0204546	0.0624333	0.019368	0.0244687	0.0278905	0.0663051	0.035411	0.00747087	0.0455782	0.0455062	0
81	-0.00574113	-0.0173451	-0.0264357	-0.030082	-0.0723925	0.0191046	0.0107015	-0.0450044	-0.0182968	-0.0082033	0
81.2	0.00886268	0.0234723	0.0269107	-0.0339501	-0.0210888	0.00581509	0.0210304	-0.035297	-0.0124828	0.0140921	0
81.4	-0.00291569	0.00115511	-0.0124951	0.0172629	0.0358895	-0.0275375	0.00916065	-0.00152349	-0.015943	-0.00916268	0
81.6	-0.0387444	-0.0213601	-0.0358614	0.0123852	0.00568164	-0.0138008	0.0157267	-0.0138533	-0.00709564	-0.0223477	0
81.8	-0.0319709	0.0222828	0.00694178	-0.0178063	-0.020041	-0.0278017	-0.012164	0.0172668	0.00674249	0.00935396	0
82	0.00745547	0.0217901	0.0241743	-0.0175874	0.013888	-0.0888662	-0.0483588	0.0607279	-0.0116581	0.00477153	0
82.2	0.0165788	-0.0272131	0.0380674	-0.0386926	0.0333786	-0.0237886	0.0188278	-0.0394956	-0.00435307	-0.00961687	0
82.4	0.0110104	-0.031952	0.00301635	-0.00192265	-0.00759991	0.00418282	-0.0685927	-0.0354188	-0.00739875	0.0219464	0
82.6	0.0162007	0.0204894	-0.0026427	0.0216228	0.00185633	0.0284423	-0.0321941	0.0271632	-0.0355319	-0.016368	0
82.8	0.0304394	0.0367414	0.0180531	0.0238848	0.0195878	0.00846152	0.009171	0.0288185	-0.00120864	-0.013432	0
83	0.0397985	0.00726893	0.0341443	0.0110932	0.0204054	-0.0116505	-0.000706042	0.0178851	0.0757958	0.0121885	0
83.2	0.0190479	-0.0074343	0.0250106	-0.0211262	0.0106509	0.00476537	0.0080688	0.0266289	0.0843926	-0.00225821	0
83.4	-0.0124167	0.00923854	0.00604484	-0.0310916	-0.0107835	0.0210379	0.0198961	0.0244582	0.0213186	-0.0134265	0
83.6	-0.00319979	0.024243	0.0130319	0.00549438	-0.0194134	0.03705	0.00962752	0.0350105	0.00101888	-0.0112845	0
83.8	-0.0185371	0.0175754	-0.0150937	-0.0259367	-0.0297087	0.0364395	0.00835896	-0.0116916	0.00316173	-0.0043341	0
84	0.0161952	-0.0328499	-0.0599467	0.0176476	-0.034146	0.0743036	0.0456665	-0.00391726	-0.0218746	0.0170885	0
84.2	1.3383e-05	0.000109301	-0.0269499	0.0484935	-0.026682	0.0181839	-0.0107781	0.00671968	-0.0333941	0.0143963	0
84.4	-0.0369661	0.0270994	0.0213428	-0.00502997	0.00177666	-0.0430262	-0.023403	0.0122659	0.0146315	-0.0232199	0
84.6	-0.0215579	-0.0187523	0.00871956	-0.0351833	0.0139815	0.000795583	0.0523982	0.0307326	0.0303039	-0.0248225	0
84.8	-0.0135687	0.00184876	0.00546065	0.0235428	-0.0132545	0.0158744	0.00486728	0.0182688	-0.0268604	0.011822	0
85	0.00451231	0.0224673	0.0232579	0.0553455	0.0119027	-0.0147627	-0.014892	0.00758698	0.0161929	-0.031748	0
85.2	0.0116592	-0.0208244	-0.0171105	0.000754331	0.0542482	-0.0223352	0.0582887	-0.040117	-0.0334338	0.00498163	0
85.4	0.00752191	-0.0145878	-0.0253619	0.0130024	0.0365227	-0.0493418	0.00506083	-0.058763	-0.00463286	0.0220878	0
85.6	-0.00453011	0.00855586	0.0118159	0.014937	0.0115675	-0.0392963	-0.0159766	-0.0389493	0.0619767	0.0330853	0
85.8	0.0100142	0.0233267	0.017893	-0.019787	-0.000716611	-0.0184265	0.000991103	0.0196944	0.0647639	0.0381894	0
86	0.0463578	0.0421229	-0.0109676	-0.00745075	-0.0120038	-0.0281468	-0.0392647	0.0323859	0.0179866	-0.00495201	0
86.2	0.030344	-0.00139948	-0.0046557	0.00757695	0.0076395	0.0161906	0.0363482	-0.05896	-0.0395728	-0.00341709	0
86.4	-0.0122267	-0.0539847	0.0134619	0.021473	-0.0143815	0.0366025	0.0537258	0.0333069	0.00524118	0.0653269	0
86.6	-0.00210692	-0.00125205	0.00094485	0.0175013	-0.00231731	0.0196272	-0.0285353	0.0424354	-0.0329311	0.0244465	0
86.8	0.00217036	0.0293168	0.00607018	-0.0375517	0.0176175	0.011909	-0.021969	0.0201585	-0.0382222	-0.00276907	0
87	-0.0234653	0.0185743	-0.00982975	-0.0512279	0.0142141	0.0205664	0.00975861	0.00221255	0.00275625	-0.00953057	0
87.2	-0.0225043	0.0123596	-0.0292425	0.000303428	-0.0053107	0.0125575	0.00499625	-0.0236755	0.0266756	-0.0116895	0
87.4	-3.23471e-05	-0.0238307	-0.00635507	0.0104143	-0.0306428	1.4502e-05	0.0193109	-0.0205865	0.0222894	0.0113627	0
87.6	-0.0216305	-0.0568762	-0.0266699	-0.0092842	-0.0386747	0.0338571	-0.023757	-0.0373878	-0.0485015	-0.0464018	0
87.8	0.00170625	0.00493211	0.0166041	0.0244327	-0.0112976	0.0478247	0.0172312	-0.0384863	-0.0323417	-0.0209714	0
88	0.0210743	0.0119318	-0.0138618	-0.0127194	0.00757274	-0.016812	-0.000673863	-0.0192548	-0.0496861	-0.014924	0
88.2	-0.0112923	0.0100713	-0.0143806	-0.0257966	0.00340194	-0.0435858	-0.0238386	-0.00312126	-0.0248834	-0.00802847	0
88.4	-0.00842994	0.00593895	0.0205906	-0.023311	-0.020587	-0.0341512	0.0413928	-0.0242099	0.0208638	-0.0121939	0
88.6	0.031134	-0.0292026	-0.000919885	-0.0432687	-0.0188862	-0.0372566	0.0274483	-0.0233451	-0.0235569	-0.0166924	0
88.8	-0.00216009	-0.0280753	-0.0184837	0.00255314	0.0212591	0.00774049	-0.109526	0.0464835	-0.0651517	0.0377928	0
89	-0.0233328	-0.0108249	0.00392227	0.0147579	-0.0120956	0.0444025	0.0168102	0.0368337	0.00112868	0.0075732	0
89.2	-0.0419123	0.0392344	0.0541509	-0.0100667	-0.0125118	-0.0171953	0.0229744	0.0425477	-0.00610098	-0.00579022	0
89.4	-0.0100626	0.00280347	-0.00726118	-0.0182109	0.0388199	-0.0382247	-0.0240566	-0.00678213	-0.00821713	-0.00487205	0
89.6	0.0126686	-0.0374966	-0.0372089	0.00104355	0.0434973	0.0027517	-0.0410984	-0.0248992	0.0480387	0.00204117	0
89.8	-0.00606737	-0.00777043	0.00237626	0.037517	-0.00241993	0.010426	-0.0238981	-0.00764247	0.0703534	-0.00384209	0
90	0.0017157	0.00594805	-0.00870609	0.0480385	-0.0233499	-0.013196	-0.0102635	-0.0205327	0.0245644	-0.0287124	0
90.2	0.0342896	-0.0261732	-0.0125754	0.00493678	-0.0186566	0.00508252	-0.0574832	0.0115452	-0.00194489	-0.0213209	0
90.4	0.00304319	-0.0331984	-0.0235734	0.0246922	0.00508852	0.0143655	0.0144006	-0.0174163	-0.0224027	-0.00258437	0
90.6	-0.00638877	-0.0261941	-0.00932664	-0.00404432	0.00985497	0.0359436	0.0195852	-0.0098473	-0.0231562	0.0109271	0
90.8	0.0156505	0.011592	-0.0152002	-0.0307917	0.0204384	0.00632578	-0.0329475	-0.00268138	0.0158742	0.00946164	0
91	-0.00122042	0.0548418	-0.0305646	-0.0325028	0.0127829	-0.0321607	0.0161789	-0.0162189	0.040501	0.00933725	0
91.2	-0.0179116	0.0280641	0.0129412	-0.0292231	-0.0313277	-0.0209561	0.0810663	-0.0147071	0.0125744	0.0184121	0
91.4	0.0288826	-0.0346438	0.0596782	0.00712455	-0.046933	0.00138448	0.00601107	-0.00166726	-0.0246042	0.0245884	0
91.6	0.0292666	0.00109384	-0.0131898	0.0439099	-0.00112773	0.0209392	-0.0329095	0.00800132	-0.0380816	0.0165709	0
91.8	-0.00141638	0.00465061	-0.0151391	-0.0106626	0.0172029	0.0160939	-0.0391723	0.0142883	-0.0354243	-0.0366834	0
92	-0.0138552	-0.0261054	-0.00604529	-0.0498068	-0.00116468	-0.0148533	-0.026217	-0.0433886	-0.0026137	-0.0163305	0
92.2	-0.000536987	-0.0184802	0.0171807	-0.0129795	0.0023655	-0.0226903	0.00825422	-0.0162419	-0.0203614	0.00206002	0
92.4	0.00294643	0.0137135	0.0481406	0.0199001	0.016714	-0.0123487	0.0301822	0.0219541	-0.0223106	-0.00126734	0
92.6	-0.0116464	0.0275663	0.0311439	0.0106008	-0.000958655	-0.0102068	0.0232283	-0.00112568	0.0496969	0.0104365	0
92.8	-0.0270382	0.0171236	-0.0209621	0.00686432	-0.0151771	-0.0107765	0.0144181	0.0543633	0.0404279	-0.0111248	0
93	-0.0647502	-0.0428817	-0.0475451	-0.0307851	0.00699978	-0.0351955	-0.0197031	0.00330664	-0.0541937	-0.0090932	0
93.2	-0.0473196	-0.0217095	0.01753	-0.0246339	-0.0216494	0.000944596	-0.0665913	-0.0105317	-0.025687	-0.011988	0
93.4	-0.0162521	0.0282386	0.00784801	-0.0388455	-0.00907414	0.00703426	-0.0202808	0.0494649	0.0181353	-0.0022528	0
93.6	-0.0101979	-0.0108302	-0.0365643	-0.0172279	0.00116451	-0.0227747	0.0218482	0.0526805	0.0211361	-0.00029154	0
93.8	0.00482512	-0.00751688	-0.0255062	0.0344747	0.00160389	0.000570863	0.0280077	-0.0296098	0.0292231	-0.0153398	0
94	0.0335121	0.0802776	-0.00357582	0.021818	0.0226996	0.0502306	0.0559018	-0.0553089	0.0259139	0.00586214	0
94.2	0.0270652	0.000173088	0.0157641	0.00750774	-0.020811	0.0257128	0.0189322	0.0223318	-0.0104813	0.0552268	0
94.4	0.0383535	-0.00246774	0.0262551	0.0220712	0.0157286	0.0259214	-0.00218535	0.017777	0.00207084	0.00521038	0
94.6	0.043767	-0.0236918	-0.0266958	0.00495144	0.015807	0.0200162	0.0102421	-0.0287785	0.0309773	-0.00278548	0
94.8	0.00912562	-0.00770334	-0.00443652	-0.014266	0.015831	-0.0265061	0.00455059	-0.0411172	0.00826634	0.00501046	0
95	-0.00662414	0.0362728	0.063952	-0.00212329	0.0207186	-0.0149735	-0.0155941	-0.0284133	-0.0248166	0.00635113	0
95.2	0.0195299	0.0204973	0.0391444	0.0347738	-0.00372806	0.0484585	-0.0229697	-0.012632	-0.0146788	0.00370394	0
95.4	0.0194248	-0.00963331	-0.0298499	0.0532953	-0.0138634	0.0321159	-0.0223817	0.0187031	0.000989696	-0.0146641	0
95.6	0.00276778	0.0165799	-0.0236494	0.0133696	0.000328426	-0.00449884	-0.00798515	0.0436392	0.00341041	0.0178019	0
95.8	0.0156545	0.0142904	-0.0127117	0.0418494	0.0147837	-0.0248142	0.00799159	0.0116428	0.0406924	0.00794092	0
96	-0.0254886	-0.00855794	0.023092	-0.00299398	-0.00338905	-0.0439652	0.027314	-0.0365649	0.0130175	-0.0105636	0
96.2	-0.0178504	-0.00374633	0.0232934	-0.0419998	-0.0243132	-0.00290376	-0.0435872	-0.0212173	0.0125092	-0.0273014	0
96.4	0.00523199	-0.000361311	-0.0262362	-0.0136898	-0.00290304	0.0327496	-0.0530748	0.0199147	0.00229372	-0.0111967	0
96.6	-0.0126491	-0.0208955	-0.0287029	-0.0163583	0.0195928	-0.0154283	0.0836693	0.0166172	-0.0682661	0.0155646	0
96.8	0.0377543	-0.00813759	0.0169083	-0.0469067	-0.010592	-0.0373377	0.0868214	-0.00157673	-0.0400305	-0.0172582	0
97	0.00179988	0.0195318	-0.0243714	-0.00744774	-0.0026455	0.00217793	-0.00910347	-0.0134686	-0.0157947	0.00886138	0
97.2	-0.0115497	-0.00420363	0.00457349	0.0348272	-0.00639817	0.0249892	-0.0294201	0.0209342	-0.0372118	-0.0182781	0
97.4	-0.0215616	-0.020447	0.0241973	0.0115888	0.000890794	-0.00758647	0.0243226	-0.00361	-0.0299185	-0.0414845	0
97.6	-0.0298651	-0.00229553	-0.00280239	-0.00494033	0.0151246	-0.0369849	-0.0102503	-0.0362595	0.00396858	-0.0166005	0
97.8	-0.0101763	-0.0179858	-0.00769932	0.00861744	0.0107949	-0.0258174	-0.0145735	0.0144254	-0.00690836	0.00524315	0
98	0.00399119	-0.0434077	-0.00109378	0.00595141	-0.000536498	-0.00611016	0.0775417	0.0506084	-0.0362479	0.0114083	0
98.2	-0.00756726	0.0204914	-0.0397229	0.0200265	-0.00385644	0.0110875	-0.0710338	-0.0246716	0.0122009	0.0355117	0
98.4	0.00378881	-0.0281117	-0.0373459	-0.00183435	0.000702499	0.04457	-0.108593	-0.0246426	0.0448939	0.0096909	0
98.6	-0.0122373	-0.0381561	0.00149713	-0.0116272	-0.00360612	0.0622694	-0.0255321	0.0204388	0.052427	0.00420423	0
98.8	-0.0248347	0.0114816	0.0125821	-0.0221826	-0.0480235	-0.027255	0.000959736	-0.036979	0.026322	-0.00786977	0
99	-0.0108577	0.0224268	0.015754	-0.0167273	-0.0174642	-0.0585622	-0.0330169	-0.0567042	0.00868075	0.00650081	0
99.2	-0.0100946	0.00724812	0.0334482	-0.000180578	0.0300461	0.00778987	-0.00489244	0.02466	0.0546151	0.025179	0
99.4	-0.0357413	0.0241411	0.0293047	-0.0209805	-0.0491204	-0.0181691	0.0530238	0.0288377	0.0703142	-0.0162517	0
99.6	-0.0386124	0.00855882	0.0211959	-0.0194691	0.0139986	0.00948478	-0.0156629	0.0441511	-0.0719558	0.0302924	0
99.8	-0.0179662	0.0097838	-0.015778	-0.0101011	0.024808	-0.00978666	-0.0243058	-0.00878426	-0.061486	-0.0129041	0
100	-0.000453946	-0.0253652	-0.0459784	-0.0393651	0.0660079	0.0132639	0.088393	-0.0230617	-0.000803705	-0.0570974	0
100.2	0.00498075	-0.0651949	-0.0452092	-0.0259782	0.0419155	0.0197519	0.0553703	-0.0440108	-0.0502784	-0.0397462	0
100.4	0.0136364	-0.0442007	-0.00431734	-0.00557896	-0.0171815	-0.0288607	-0.0331897	-0.0214985	-0.078043	0.00315303	0
100.6	0.0341654	0.0199228	0.0115031	-0.0203797	-0.00675864	-0.0430735	-0.0046594	0.0629334	0.013299	0.0181903	0
100.8	0.0527267	0.0434799	-0.0561135	0.0318458	-0.0446346	-0.0080391	-0.0567902	0.0283903	0.0447651	0.00340514	0
101	0.0579949	-0.0179657	-0.0296312	0.0118747	-0.0132952	0.022713	0.023409	0.0527439	0.0183072	0.0550716	0
101.2	0.0376994	-9.64861e-05	0.00102875	-0.00291781	-0.0168419	-0.000410169	-0.0214978	-0.000151638	-0.0245113	0.0210253	0
101.4	0.0106795	-0.0140313	0.0536435	0.0185289	0.00168238	0.00402089	-0.0484808	-0.00313747	0.0136018	0.0167025	0
101.6	0.00298976	-0.0331655	0.0513525	0.0177989	-0.0282797	0.0254178	0.0200944	0.0248407	0.0687074	0.0124717	0
101.8	-0.0159241	-0.00607059	-0.0139599	-0.0248458	-0.0479117	0.0259797	0.0268485	-0.0163358	0.029551	0.00833808	0
102	-0.0452432	0.0112819	-0.0111368	-0.0198651	0.0591694	0.0218912	-0.00600732	-0.0404328	-0.027778	0.0577377	0
102.2	-0.004441	0.0600279	0.0241281	0.0730116	0.050928	0.00116201	0.0868112	0.00314941	0.0230054	-0.0270228	0
102.4	-3.09984e-06	0.0287722	0.0242156	0.0451181	0.0247963	0.0217768	0.0157992	-0.0245632	0.0282931	-0.0549227	0
102.6	0.0189248	0.0304196	0.0478415	0.0302192	0.000893028	0.00910685	-0.0188729	-0.019472	0.011226	-0.0257637	0
102.8	0.0153204	-3.82181e-05	0.0412119	0.0251276	0.003676	0.00686557	0.0104037	0.0247998	0.00480222	-0.00887334	0
103	0.00323364	-0.0133218	0.019085	-0.0222051	0.018117	0.0382567	0.00446749	0.0289906	0.00447068	-0.0123742	0
103.2	0.00853781	0.02907	0.0201058	-0.0326023	0.011031	0.0473122	-0.0149592	-0.000102891	0.00134061	-0.00848197	0
103.4	-0.0109331	0.00223461	0.0003829	0.0240448	0.00143932	0.011721	0.00256104	0.0162254	-0.00381352	-0.00361907	0
103.6	0.00714478	0.0122066	0.000196543	0.00380774	0.0028185	-0.0405433	0.00534817	0.058192	-0.00370807	-0.0217499	0
103.8	0.0160422	-0.0046532	-0.0326296	-0.00418318	0.00786087	-0.0347611	-0.00350286	-0.0125553	-0.042882	0.0077921	0
104	-0.015817	0.00528119	-0.0293364	-0.023822	-0.00774448	-0.00701736	0.0436606	-0.0400804	-0.0444131	0.0281646	0
104.2	-0.00381011	0.00655209	-0.0137747	-0.00957465	-0.0309634	0.00962233	0.0386457	-0.00141245	-0.00334267	0.0228946	0
104.4	0.0114097	-0.00506194	-0.0210594	0.00235208	-0.0123732	-0.00996	-0.0128682	0.0211373	0.0205773	0.00495431	0
104.6	-0.0299308	0.0184972	-0.00437859	-0.0297262	0.0188856	-0.0432696	-0.00227608	0.00235907	0.0283355	-0.0206262	0
104.8	-0.0113715	0.0074882	0.0265058	0.00342855	-0.0148031	-0.0199968	0.00294806	-0.0456353	0.028844	-0.0155954	0
105	-0.0105368	-0.0567252	-0.0239373	-0.00915368	-0.00911533	-0.0165411	0.00971892	-0.0357013	-0.0454484	0.0129469	0
105.2	-0.0041551	-0.034963	-0.0562122	-0.00616058	-0.0220896	-0.0319274	-0.0182267	-0.00919126	0.027954	-0.020996	0
105.4	0.000717046	-0.00650563	0.00313944	-0.0149194	-0.0268941	0.0166154	-0.0511967	0.00278762	0.0368744	0.00399234	0
105.6	-0.0241787	-0.00596955	0.0331755	-0.0126752	-0.0138272	0.0425453	-0.0410893	0.0140019	-0.0223758	0.00224925	0
105.8	-0.0410779	-0.0111613	0.00222915	0.00782825	-0.00877668	0.00149077	0.00782577	0.0352658	-0.0163521	-0.031585	0
106	-0.00338531	-0.0311072	-0.00150228	0.0138856	-0.00873965	-0.00107743	0.00847617	0.0196305	-0.010072	0.0260425	0
106.2	0.0243313	-0.00110247	-0.0427051	0.0542838	-0.0116707	0.00938225	-0.0709027	-0.0514259	0.000154475	-0.0120747	0
106.4	-0.00409811	0.0581353	-0.00275007	0.00348934	0.000969348	0.013684	0.0254513	0.00756594	-0.0109148	0.0324984	0
106.6	-0.00360556	0.0389506	0.0557212	0.0149638	0.0373001	0.00150813	0.0470626	-0.0109027	-0.00164567	0.018352	0
106.8	0.0072949	0.0149234	0.04367	0.0388276	0.025486	0.0530164	0.0146244	0.0104452	0.0283663	0.0430423	0
107	0.0236892	0.0257476	0.0117908	-0.00729365	0.00428265	0.0560408	0.055001	0.0227226	0.0346873	0.0441991	0
107.2	0.0491165	0.0176401	0.0267276	-0.0271321	0.0381232	-0.0337533	0.0785793	-0.0346609	0.00473583	-0.0542587	0
107.4	0.025581	0.00911239	0.0212886	0.0402712	0.0519039	-0.0114472	0.00935451	0.0460098	-0.0104065	-0.035773	0
107.6	0.0033332	0.0288254	-0.0454664	0.0489414	0.0189798	0.0160572	-0.0134352	0.0164927	0.0132709	-0.000492262	0
107.8	0.031547	0.0169525	-0.00728312	-0.0250324	-0.0182138	-0.0139883	-0.0213135	-0.0120739	-0.047279	0.00515908	0
108	0.0082385	0.00856777	0.0191366	-0.0153068	-0.017265	-0.0280745	-0.0174606	0.00733892	-0.0542454	-0.0214636	0
108.2	-0.00450155	0.0134699	-0.00571372	-0.00195748	0.00344695	-0.0370167	-0.0641866	0.0319912	-0.0106973	0.00565439	0
108.4	0.0214244	-0.0254841	-0.00661676	-0.0215604	0.00487294	-0.0460153	-0.0679317	-0.0119361	-0.00986744	0.0250647	0
108.6	-0.00269681	-0.0569656	0.0140377	0.00745777	-0.0103292	-0.0169423	0.0310411	-0.0727069	0.004195	-0.0203011	0
108.8	-0.028742	0.0204619	0.00769414	-0.0117859	-0.0155009	0.004056	0.0104672	-0.00123607	0.0803598	0.0229307	0
109	-0.00421865	-0.0163485	0.00219929	-0.0228994	-0.0239141	-0.00407804	0.00651459	0.018192	0.0497782	-0.0119729	0
109.2	0.0175553	-0.00267133	0.0153566	-0.00140361	-0.0243274	-0.0218775	0.0129056	-0.0102447	-0.0145697	-0.0333336	0
109.4	-0.00930442	0.00848663	-0.00742463	-0.00435078	-0.0108344	-0.0365672	-0.000243903	-0.00704481	0.0059656	-0.0205206	0
109.6	-0.0223173	-0.0342642	-0.0472474	0.000284138	-0.000395003	0.00202748	-0.00682532	0.00164006	0.0246487	-0.00435375	0
109.8	-0.00174864	-0.0209797	-0.0374842	0.0327635	-0.00839395	0.0542064	0.0182669	0.014719	0.00874727	0.00291237	0
110	-0.00623909	0.035234	0.00667241	0.0231163	-0.013798	0.0348014	0.0353183	0.057253	0.0326527	0.00205604	0
110.2	0.00483079	-0.0339203	0.0197447	0.000171621	0.0174466	0.031806	-0.00577052	0.0277556	-0.0232218	0.0212868	0
110.4	0.014568	-0.0166931	0.0133297	0.0204047	0.0401674	0.0156553	-0.0207415	0.0479522	-0.0379278	0.033472	0
110.6	0.0311495	0.030221	0.025076	0.0017565	0.0238697	0.0329675	0.00524743	0.00945859	0.00274281	-0.0126086	0
110.8	-0.00452055	0.0142923	0.0250777	-0.00138358	0.0328274	0.0181625	-0.00237612	-0.0257933	0.018855	-0.00794627	0
111	-0.0376644	0.0173308	0.00932989	0.00707077	0.0424575	-0.0256981	0.0207964	0.0131792	0.000305343	0.0218755	0
111.2	-0.00568137	0.0399767	-0.00912702	-0.0300202	0.00518217	-0.017143	0.0363061	0.0207587	0.001525	-0.0101659	0
111.4	-0.00360414	-0.0334838	-0.0298072	-0.033596	-0.0111794	0.00939232	-0.0858601	-0.0357627	0.00717868	-0.00493565	0
111.6	-0.0105986	-0.0168266	0.00933353	0.001522	-0.0237328	0.000324248	0.0112222	0.00390537	-0.0420889	0.0239977	0
111.8	-0.0194394	-0.00738418	-0.0403514	-0.0205158	-0.0297228	-0.0270863	0.0134443	-0.0201354	-0.0299101	0.00363241	0
112	0.003484	-0.00754444	-0.0250067	-0.0199427	-0.0334197	0.00702942	0.0204923	-0.0718807	-0.0340295	-0.0182351	0
112.2	0.00609632	-0.00468011	0.0171483	-0.0147454	-0.0361679	0.013578	-0.00016145	-0.0782778	-0.0639858	-0.0042076	0
112.4	-0.011598	-0.00483802	0.00767601	-0.0142518	-0.0263205	-0.0321188	-0.0276057	-0.0522658	-0.0336531	0.00775905	0
112.6	0.00207654	-0.00646165	0.00153135	0.00849439	-0.0124269	-0.033882	0.0402802	-0.0100968	0.0145267	-0.00826689	0
112.8	-0.0105593	-0.0163129	-0.0366083	-0.0332932	-0.020298	-0.0382155	-0.0321446	0.0233669	-0.0240577	-0.0247141	0
113	-0.0161616	0.00728039	0.00574201	-0.0236679	-0.0135955	-0.0302832	-0.0671506	-0.034348	-0.000872892	-0.0448114	0
113.2	-0.0136991	-0.0362829	0.00658997	-0.0310413	-0.0312476	-0.00113908	-0.0416679	0.0281115	0.0124247	0.00716864	0
113.4	0.0099153	0.00126891	-0.0152012	-0.00699152	-0.00916111	-0.00454755	-0.00695956	0.0554333	0.0121265	0.00371738	0
113.6	0.0500761	0.0259552	-0.0338055	0.0446206	0.00845142	0.0160645	0.00654229	0.00652401	0.0247103	-0.00685221	0
113.8	0.036207	-0.025281	-0.029102	0.0469334	0.0021165	0.0562887	0.00547032	0.0182417	0.0261735	0.0391453	0
114	-0.0455504	0.0345701	0.0249599	0.0202767	0.0424367	0.0183605	0.0046103	0.0265386	0.0145619	0.00571724	0
114.2	-0.0458768	0.0133237	0.00676085	0.0227308	0.00642797	0.0206402	-0.0068086	-0.0346949	0.0142099	-0.0359669	0
114.4	-0.0123017	-0.0335884	0.0109311	0.035211	0.0149324	-0.00634548	-0.00644154	0.018674	-0.045182	-0.0262295	0
114.6	-0.0175395	-0.00267299	-0.0134318	0.00888796	0.0551759	0.00579534	-0.0269262	0.0287393	-0.00852835	-0.0094235	0
114.8	-0.0129228	0.0101221	-0.00999367	-0.0264793	0.0583249	0.0123718	-0.0439803	-0.0351088	0.0033247	-0.00851767	0
115	0.00980864	-0.0271511	0.00129963	-0.0320164	0.0275865	-0.0192894	0.0250415	-0.0295107	-0.0225238	-0.00126231	0
115.2	0.00588069	-0.00133157	-0.0117048	-0.0129923	0.00397485	-0.0318697	0.108557	0.0253797	0.000878702	0.0332231	0
115.4	0.00558974	0.0595941	0.0585197	0.00461656	-0.0140716	-0.0290924	0.0480106	-0.0105458	-0.055053	0.0599757	0
115.6	0.0114348	-0.00327335	0.052392	-0.017401	-0.0367396	-0.0240498	0.0173407	-0.00894448	-0.0174436	0.00813606	0
115.8	0.00670207	-0.0154732	0.0111673	-0.00938826	-0.0159522	-0.000487715	-0.0364113	-0.00568412	0.0824546	0.0299317	0
116	0.0143257	0.0296938	-0.0111958	-0.010054	-0.0242391	0.0388867	-0.0149231	0.0381367	0.0963916	0.00709595	0
116.2	0.0127433	0.00090955	0.00526229	-0.0112211	-0.00850093	0.0700516	0.0412569	0.030832	0.0408015	-0.00190667	0
116.4	0.00119093	-0.0358642	0.0223995	-0.000685931	0.0123677	0.0624988	0.0143231	-0.025916	0.0129678	0.0390747	0
116.6	0.00961244	0.0111667	-0.00928646	0.00171441	-0.0270801	0.031836	0.0040635	-0.0212118	0.00441428	-0.00986796	0
116.8	0.00138587	-0.0221132	-0.0366333	0.0342228	0.0290183	0.0275219	0.092832	-0.0548449	-0.0218632	-0.0495928	0
117	-0.00191107	0.0312735	-0.00216837	0.0262748	-0.00741174	-0.0200611	-0.0531034	-0.00891037	0.00319044	-0.017664	0
117.2	0.000179185	0.0530457	-0.0196004	0.0493757	-0.0222939	-0.0396379	-0.0285437	0.0735108	0.0115505	-0.0073537	0
117.4	0.00780238	-0.00160482	-0.0279089	0.0106871	0.00720595	-0.0147418	0.0367736	0.0600835	-0.0299231	0.0207034	0
117.6	0.0197124	-0.0250503	-0.00961963	-0.036054	0.0231933	0.000989926	-0.0154547	0.0132114	-0.0446451	0.0347952	0
117.8	0.0133113	-0.00174069	-0.0122073	0.00422872	0.0301311	-0.017687	-0.0381394	-0.00658725	0.0337387	-0.00357821	0
118	-0.0109886	-0.0103545	0.00358328	0.0229055	0.0352775	-0.0401082	-0.0154058	-0.055007	0.0841556	-0.00536433	0
118.2	0.00663034	0.0211913	0.014997	0.0273182	-0.00288668	-0.0406583	-0.0155842	-0.00742723	-0.0573648	-0.00943685	0
118.4	0.0112742	0.0503935	0.0106149	0.000773018	-0.0321533	-0.0508641	-0.0378144	-0.036444	-0.0145332	-0.00903269	0
118.6	-0.0123065	0.0109559	0.028252	-0.0141611	0.00862258	-0.0136147	-0.0198337	0.0108557	0.00519337	-0.03722	0
118.8	-0.0227001	-0.0185282	0.00525282	-0.0528346	0.00667153	0.0161763	0.00896953	0.0267159	-0.00301552	-0.0150427	0
119	-0.00741868	-0.000866711	-0.0111487	-0.0617451	-0.0326036	0.00446658	0.018151	-0.026406	0.00246602	0.0218278	0
119.2	-4.63135e-05	-0.0108461	0.035957	-0.00182248	-0.00500447	0.0174433	0.0138061	-0.00796948	-0.0370037	-0.014104	0
119.4	-0.00982483	-0.0477	0.00497057	-0.00445346	0.0098653	0.0385512	-0.0145851	-0.00176418	0.00989775	0.0044952	0
119.6	-0.00768653	-0.0419874	-0.0090089	0.0423962	0.0145353	-0.00392663	-0.00148057	0.0469578	0.0293134	0.069974	0
119.8	-0.0149458	-0.0122769	0.0264827	0.0381991	-0.00474761	0.032926	0.00355745	0.0567486	0.0545829	0.0338378	0
120	0.0155709	0.0384059	0.0284752	0.0319202	-0.00866212	0.0652732	0.0617076	0.0438741	0.0190815	-0.00191082	0
120.2	0.0378722	0.0511382	0.0230825	0.0381803	0.0256491	0.0566846	0.101233	0.0706365	-0.0287932	-0.000965029	0
120.4	0.0294705	0.0334044	0.0656241	0.0378815	0.0284028	0.0637041	0.0297739	0.0941203	0.0143187	0.000104886	0
120.6	0.0521804	0.041352	0.0984155	0.0521904	-0.0124205	0.0744336	-0.0225805	0.048469	0.0820578	0.0289586	0
120.8	0.0477509	0.00894735	0.0849241	0.0343782	0.0360891	0.0752854	0.0670133	0.0247594	0.0686202	0.042421	0
121	0.0223879	0.0594313	0.0853835	0.0397635	0.045794	0.0613517	0.0933473	0.0789101	0.0603895	0.0282176	0
121.2	0.0629262	0.0536477	0.0825016	0.0551383	0.0625191	0.040704	-0.00847522	0.0435079	0.0428451	0.043888	0
121.4	0.0698089	0.0377278	0.0555703	0.0553742	0.0513903	0.0420189	-0.00485557	0.0287724	0.0704521	0.044768	0
121.6	0.0303727	0.0344424	0.0409414	0.0497298	0.0366365	0.0512683	0.064228	0.0757397	0.0931755	0.0328217	0
121.8	0.0241949	-0.00651056	0.074282	0.0614157	0.0575408	0.0613412	0.0239104	0.0482756	0.0468832	0.0426437	0
122	0.012642	-0.00230997	0.10752	0.0726177	0.0331621	0.0829489	-0.00646907	0.014415	0.0429867	0.0401416	0
122.2	0.00328135	0.0449765	0.0723308	0.0345616	0.0164622	0.0455116	0.00583774	0.118277	0.0866819	0.0619784	0
122.4	-0.00655814	0.00191379	0.079822	0.0394436	0.0392327	0.0658535	0.0816051	0.0382316	0.0784474	0.0710517	0
122.6	0.0312695	0.0113263	0.0883527	0.0519185	0.0618392	0.0855536	0.0663237	0.0542091	0.0766854	0.057433	0
122.8	0.0511785	0.0408452	0.0776105	0.0277023	0.0350837	0.0399841	-0.00542002	0.122423	0.0684622	0.0804655	0
123	0.0397829	0.0432119	0.0893099	0.0403817	0.0283834	0.0277972	0.0204486	0.117121	0.0687162	0.121713	1
123.2	0.0637979	0.105952	0.115789	0.131563	0.0948541	0.0974465	0.111169	0.142571	0.116657	0.108117	1
123.4	0.0769742	0.152017	0.117271	0.168073	0.0996762	0.10045	0.118658	0.116713	0.114699	0.0873032	1
123.6	0.0807754	0.083044	0.120169	0.100468	0.0459518	0.0889432	0.114338	0.126145	0.112038	0.105275	1
123.8	0.061239	0.0929798	0.094	0.0592361	0.0953008	0.134111	0.103958	0.114108	0.0861691	0.077796	1
124	0.0683281	0.0631751	0.0800639	0.0643371	0.0607795	0.106844	0.0372125	0.101567	0.0683797	0.0819951	1
124.2	0.0419455	0.0259683	0.0668601	0.0561004	0.0146364	0.056994	-0.0157008	0.0862299	0.0371246	0.0781984	1
124.4	-0.0236972	0.0758142	0.0292716	0.0486108	0.0514644	0.0497099	0.00165129	0.0439872	0.0178746	0.0356005	1
124.6	-0.00451347	0.0730386	0.0252739	0.0573023	0.00774551	-0.00211567	0.0159328	0.00100531	0.0587928	0.0433064	1
124.8	0.0384028	0.0176069	0.0596455	0.00573583	0.0215274	-0.0011926	0.0139723	-0.0341223	0.0277062	0.006326	1
125	0.0396529	-0.0166922	0.0227231	0.0483181	0.00223194	-0.00973754	0.0171202	-0.00951863	0.0551042	-0.00287034	1
125.2	-0.0296355	0.0153985	-0.00241044	0.0394856	0.000342204	-0.0627638	0.0172865	0.0495829	0.00208977	-0.00323604	1
125.4	-0.0362742	-0.0275875	-0.0333857	-0.0222213	0.021069	-0.076998	0.0103409	0.0469042	-0.0352234	-0.0591074	1
125.6	-0.011566	-0.0640188	-0.0610174	-0.0435835	0.0237912	-0.0192933	-0.00994975	-0.0325076	-0.0122873	-0.0664708	1
125.8	-0.038002	0.00491115	-0.0282299	-0.0222062	-0.0050689	-0.000313137	-0.0529145	-0.0765445	-0.0280517	-0.0028103	1
126	-0.0168776	-0.0297513	-0.0113253	-0.00540667	-0.0458896	-0.0745117	-0.0702325	-0.0446285	-0.0260191	-0.0458514	0
126.2	-0.0555594	-0.0548843	-0.0643085	-0.0485893	-0.0364008	-0.0715125	0.00733902	-0.0732664	-0.0125452	-0.0467356	0
126.4	-0.0466821	-0.0131537	-0.0956418	-0.0446421	-0.0508488	-0.0546954	-0.0408793	0.0135405	-0.0250229	-0.0637974	0
126.6	-0.0414523	0.00978697	-0.035154	-0.0451143	-0.0364502	-0.0429098	-0.0730343	0.0173471	-0.00648116	-0.0606995	0
126.8	-0.0314271	-0.024135	0.0133005	-0.0765757	-0.00609553	-0.0515355	-0.0759324	-0.0824439	0.00868312	-0.0534124	0
127	-0.0131537	-0.0479647	-0.0107336	-0.0576227	-0.0343122	-0.0664635	-0.0734882	-0.0764345	-0.0137489	-0.0894806	0
127.2	-0.0370864	-0.0215733	-0.0353406	0.00126689	-0.0774008	-0.0382688	-0.019963	-0.00202221	-0.0309007	-0.112386	0
127.4	-0.0394031	-0.0158195	-0.046152	-0.0327435	-0.0397755	-0.014315	-0.047301	-0.0672699	-0.04932	-0.0766055	0
127.6	-0.0493648	-0.0610045	-0.0317863	-0.0556138	-0.0304053	-0.0766499	-0.0256802	-0.0644665	-0.0469255	-0.100015	0
127.8	-0.042978	-0.0568439	-0.0839667	-0.0447182	-0.0645006	-0.0959599	-0.00474319	-0.044327	-0.0377757	-0.0763257	0
128	-0.0456644	-0.0554088	-0.0963489	-0.066787	-0.0768884	-0.059972	-0.0169131	-0.0451731	-0.0309652	-0.0580805	0
128.2	-0.0426416	-0.0471338	-0.0531817	-0.035857	-0.0506275	-0.0391881	-0.0201126	-0.00417244	-0.0175344	-0.0585597	0
128.4	-0.0033848	-0.0108081	-0.0361679	0.0399408	-0.0376206	-0.0241052	-0.00713853	0.0452078	-0.00398513	-0.0238805	0
128.6	0.0229501	-0.0273838	-0.0351194	-0.0141014	-0.0514604	0.008978	0.00407087	-0.00433802	-0.0125879	-0.00597991	0
128.8	-0.00579025	-0.0328012	-0.0622626	-0.0496616	-0.026009	-0.0209104	0.0444604	-0.0635446	-0.0184258	-0.0373675	0
129	-0.0362859	-0.000707393	-0.0383119	-0.0122818	-0.0071059	-0.0494475	0.00183335	-0.0491998	0.0315511	-0.073453	0
129.2	-0.0183879	-0.0122686	0.0231079	-0.031865	-0.0265991	-0.0550158	-0.0140848	0.0194583	-0.0110355	-0.0444459	0
129.4	-0.0232282	-0.0217431	0.0289702	-0.0342424	-0.0594443	0.0144581	0.00332885	0.00888544	-0.0436086	0.00269884	0
129.6	-0.0495163	-0.011608	0.00479267	-0.00353071	-0.0487019	0.0325297	-0.0289495	-0.0271382	0.025966	0.00547842	0
129.8	-0.0156964	-0.00547571	0.0155737	-0.0120418	-0.0142009	-0.0328658	-0.0520211	-0.00984154	0.0460326	-0.0278856	0
130	0.0212904	0.0321998	0.000538264	0.0158245	-0.0323662	0.0471342	0.00850545	-0.0536471	-0.0326653	-0.0520802	0
130.2	-0.029124	-0.0177757	-0.0146994	-0.00101782	-0.0150379	0.00780368	-0.0258374	0.00239038	-0.00265275	-0.012401	0
130.4	-0.0205024	-0.00387152	-0.00589544	-0.00495116	0.022423	-0.0100751	0.0434962	-0.00487463	0.0386563	-0.0314139	0
130.6	0.035106	0.0426469	0.000438226	0.0184699	0.0455249	-0.0125138	0.00815098	0.0249467	0.0288437	0.0166929	0
130.8	0.0220175	0.0261067	0.011538	-0.00405448	0.02565	0.00164569	-0.0235349	0.0204614	0.0156893	0.0270592	0
131	-0.0236124	-0.00929789	0.021419	-0.0226414	0.00322692	0.00957392	0.0479256	-0.0341621	-0.0139742	-0.00732429	0
131.2	0.00303404	0.0169305	0.0170496	0.0306554	0.0344387	-0.0268749	0.0152277	0.0196209	-0.0725284	0.0691073	0
131.4	0.0235744	0.0277641	0.0348145	0.0117776	0.0466792	0.0131024	0.0127236	0.0186406	-0.0372799	0.0120602	0
131.6	0.0155035	-0.0546932	-0.0206275	0.0398923	0.000793108	-0.0299563	-0.000310862	-9.28838e-05	-0.00853246	-0.0194774	0
131.8	0.00745237	0.0219241	-0.00017544	0.0138284	0.0111755	-0.0304544	0.0216337	0.0103981	-0.00315629	-0.0372027	0
132	0.0276002	0.0329021	-0.0249465	-0.0410155	-0.00988405	-0.0268402	0.010932	-0.0359696	0.000306889	-0.0126299	0
132.2	0.0241623	-0.0465525	-0.0470976	-0.0269752	-0.0381173	-0.0168006	-0.0448316	-0.0519183	-0.00662919	0.0233999	0
132.4	-0.0275176	-0.0395763	0.00703489	0.013942	-0.010935	0.0269934	-0.049336	0.026393	-0.0214824	0.00162684	0
132.6	-0.0434447	-0.0467733	-0.0385835	-0.00161507	-0.0367939	0.0104134	-0.0184062	0.0181315	-0.0149933	-0.00936398	0
132.8	-0.0149018	0.0142238	-0.0139531	-0.00316146	-0.0305717	0.023825	-0.0648656	-0.0273416	-0.00144122	0.0407356	0
133	-0.0230552	-0.00193585	-0.00257493	-0.0290171	0.00557492	0.025921	-0.023814	0.0117087	0.00722656	-0.00534445	0
133.2	-0.0145598	-0.0218955	-0.0145013	-0.0310451	0.00163352	-0.0166482	0.0348961	0.0364018	-0.0192158	-0.0125647	0
133.4	-0.0210083	-0.0166108	-0.00700738	-0.0241318	-0.0180455	0.00221993	-0.01155	-0.0364569	-0.0549313	0.0021706	0
133.6	-0.0229325	-0.00230762	0.0271579	-0.0122174	-0.00661738	0.0333815	-0.0505844	-0.0326612	-0.0583538	-0.0135033	0
133.8	0.0275451	0.0238664	0.0462463	0.0232488	0.0146785	-0.0260965	0.00744941	0.0767209	-0.0328927	0.00539638	0
134	0.0184012	0.0207627	0.014595	0.0212371	0.018709	-0.0253848	-0.000576777	0.0063861	0.00735429	0.022247	0
134.2	-0.00436797	0.0282398	-0.0112179	0.0125727	0.0182203	0.000143513	0.0193339	0.0227791	0.0646063	0.000489433	0
134.4	-0.00158641	-0.00166057	-0.0166536	0.00405487	0.0193719	0.00825611	0.0489275	-0.014937	0.0543108	-0.0109734	0
134.6	0.0103668	-0.00251809	-0.000682583	-0.0135477	0.0324975	-0.00781874	0.0518882	-0.0101113	0.0365167	-0.00596087	0
134.8	0.0260016	0.0221332	-0.0147291	-0.0275556	0.0126389	0.00503246	0.0113337	-0.000798814	0.02346	0.00726154	0
135	0.0410893	0.00773851	-0.0206542	-0.0141526	-0.028797	0.030073	-0.0379118	-0.0369219	-0.00192997	0.0171754	0
135.2	0.0327333	-0.0205418	0.0341524	0.00628296	-0.00418365	0.0186461	-0.0338913	0.00159626	0.0176784	0.00699162	0
135.4	0.00877829	-0.0106655	-0.00302685	-0.0126129	0.0402662	0.0418961	-0.00443917	0.000240995	0.0687742	-0.00355222	0
135.6	-0.00485659	0.0248669	-0.00685554	0.0069321	-0.00175875	-0.0275086	-0.018342	-0.00323152	0.0712681	0.00053715	0
135.8	0.00393728	0.0479801	0.0356405	0.0599482	-0.0327553	-0.0198123	0.0315463	-0.048279	0.0440995	0.008412	0
136	-0.00623248	0.00879669	0.0398715	0.0188375	0.028357	-0.0208039	0.0497833	-0.0133499	-0.0141849	0.00828614	0
136.2	-0.0270994	-0.0219754	0.011831	-0.0320492	0.064053	-0.0395555	-0.0313587	0.0142912	-0.0487174	0.0207146	0
136.4	-0.0176905	-0.0156956	0.00823102	0.0126527	-0.00237736	0.00819917	-0.0716831	-0.0302397	-0.0424076	0.0134159	0
136.6	-0.0065108	-0.0719549	5.33796e-05	0.0180323	-0.0205176	0.00114728	0.00466022	0.0526561	-0.0785063	-0.0451995	0
136.8	-0.0156814	-0.0669379	-0.0374157	0.0301902	0.0274881	-0.0151281	0.037051	0.0232135	-0.0643883	0.00092833	0
137	0.0205721	-0.00236899	-0.0409659	-0.00124942	-0.0450622	-0.0550151	-0.0237436	-0.0134241	-0.0050973	-0.000343756	0
137.2	-0.01049	-0.0117639	-0.0397215	-0.0348706	-0.0346782	0.00688901	0.055387	-0.0323277	0.00576997	-0.00253676	0
137.4	-0.00804414	0.0103926	-0.0163939	-0.0202478	-0.00341105	0.0510081	0.0982835	-0.0057708	0.0324005	0.00709928	0
137.6	0.0424096	0.0713558	0.0026691	0.00374832	-0.0378583	0.0222532	-0.0106029	0.0319271	0.0436533	0.00206166	0
137.8	0.00114705	0.0285776	-0.0278024	-0.00736677	-0.00799022	0.0296553	-0.0440538	0.00562487	-0.0287231	0.011417	0
138	-0.0133339	0.00922219	-0.020597	-0.0121375	0.0224853	-0.0103638	-0.0235419	-0.0130827	-0.00560537	0.0183494	0
138.2	-0.025858	0.0166303	-0.0160027	-0.00244631	0.0300139	0.00607383	-0.0170892	-0.0126526	-0.00813105	0.0153748	0
138.4	-0.0213878	0.000485519	0.027374	0.0243776	0.025381	0.00683614	-0.0250822	0.0179293	0.0225646	-0.00167438	0
138.6	-0.0100004	-0.0297996	0.0492116	0.00545038	0.0047426	0.0100385	-0.0164213	0.0512216	0.0280766	-0.0138158	0
138.8	0.00657097	-0.0236323	0.0351026	-0.0229153	-0.00855339	0.00407824	-0.0380446	0.0181988	0.00185254	0.00107171	0
139	0.0224736	-0.0157425	0.017101	-0.0131289	-0.0176864	-0.0189419	-0.0558778	-0.0207136	-0.000454178	0.0248849	0
139.2	0.00670456	-0.0407731	-0.0168431	-0.00279413	-0.0428747	0.00599637	0.0147709	0.032042	-0.00945444	0.00495207	0
139.4	-0.026352	0.0138124	-0.0257854	0.0272403	-0.024252	0.0230609	0.0186979	0.0193672	-0.0215601	-0.0470097	0
139.6	-0.0339626	-0.0134507	0.0167039	-0.0122845	-0.0314686	-0.0102089	0.00687201	-0.0178821	0.0247591	-0.000105957	0
139.8	0.00143477	0.00922147	0.0258734	-0.0376157	-0.0127247	-0.0150171	0.0147642	-0.0816245	-0.0193397	0.0214043	0
140	0.0296754	0.0536709	-0.00453922	-0.0248592	0.0205226	0.00132541	0.0228234	-0.06555	-0.0145632	-0.00557551	0
140.2	0.0151831	0.0200343	-0.0401051	0.00876325	0.0100821	0.0111719	0.0350887	-0.00709431	0.0345711	-0.0241297	0
140.4	-0.00272209	-0.024038	-0.0533339	0.0455068	-0.00325844	0.000782319	0.0521674	-0.00709091	-0.00819476	-0.017204	0
140.6	0.00527709	-0.00259085	-0.00764804	0.0204215	0.0353777	-0.047147	0.0212214	0.0258957	-0.0112667	0.0126711	0
140.8	-0.0142945	0.0097994	0.0448233	-0.0377766	0.00838929	-0.022345	-0.0342171	0.0305544	-0.0528596	0.000487359	0
141	0.0249199	0.029977	0.0398521	0.00890233	0.0088605	0.00435541	0.0351815	0.0129555	-0.00636414	0.00740184	0
141.2	0.00966326	0.0214188	0.0114207	0.0191628	0.0282959	0.000409581	0.0363765	-0.0295844	0.0503818	0.00527928	0
141.4	-0.0234341	0.000377481	0.00346873	-0.0044462	0.00999184	-0.0180765	-0.0519864	-0.0221965	0.0166162	-0.000193442	0
141.6	0.0108276	-0.0114489	0.00189099	0.015076	-0.0116238	-0.00341917	-0.0365164	0.036856	-0.0380777	0.0144273	0
141.8	0.0207327	-0.0341868	-0.01236	0.0185762	0.00306444	0.0231835	0.0381155	0.0421939	-0.0323461	0.013499	0
142	-0.0256414	-0.0323701	-0.0140947	0.00224086	-0.00264634	-0.0330422	-0.0512775	0.00589796	-0.0309432	-0.0146475	0
142.2	0.00229856	-0.00151772	-0.016289	-0.0168205	0.0123905	0.0034711	-0.0743216	-0.0256078	-0.0131287	-0.0207202	0
142.4	0.0166472	-0.0192326	-0.0170291	-0.0333441	0.00439014	-0.0124338	-0.00263574	0.0107525	0.0445531	0.0167978	0
142.6	-0.00536155	0.000848619	0.0267075	-0.0046148	-0.0274546	-0.00406603	0.00333077	-0.0112926	0.0717365	0.0249255	0
142.8	-0.017393	0.0255792	0.0383375	0.0152688	-0.0252447	0.0252806	-0.0472706	-0.0213901	0.0116277	0.0116489	0
143	0.00461895	-0.0206154	-0.0231983	-0.0155219	-0.00148047	8.13835e-05	-0.0262771	0.0519143	-0.0467223	0.0101245	0
143.2	0.0366985	-0.0312576	-0.0297298	-0.0259986	-0.0139073	0.00187695	0.0220826	0.0395105	-0.00637956	-0.0116723	0
143.4	0.0153923	-0.00090679	0.0147477	-0.0261927	0.00146511	-0.0150955	-0.00377932	0.0187537	0.00815533	-0.00266628	0
143.6	0.00354197	-0.0161757	0.014147	0.0400023	0.0145029	0.0223806	0.0799571	-0.0154862	0.000117387	-0.010381	0
143.8	-0.00985975	0.01055	0.0374495	0.0636916	0.0232394	0.0596486	-0.00986106	-0.0188001	0.0239141	-0.00565385	0
144	-0.00313158	0.0263819	0.0536092	0.0124248	0.0132585	0.0349388	-0.0411406	-0.0208458	0.0495851	-0.00921817	0
144.2	0.000634074	0.00664038	0.0113189	-0.000677919	0.000927197	-0.00607545	0.0555643	-0.0138922	-0.0096107	-0.0126602	0
144.4	-0.0267674	0.018241	-0.0219636	0.0198753	0.0129435	0.0032435	0.020881	0.0193707	-0.0691705	0.0104012	0
144.6	-0.0152063	0.00626457	-0.00657555	-0.0458975	0.0106589	0.0287249	0.0206512	0.00129761	0.0274444	0.00218859	0
144.8	-0.0159835	-0.0183799	-0.0266757	-0.00380639	-0.00786791	0.00181304	-0.0462064	0.00405713	0.00434315	-0.00496235	0
145	-0.00723856	-0.00849624	-0.0315009	0.0105649	0.00375847	-0.0458652	0.0232264	-0.0312204	-0.00862583	-0.0184031	0
145.2	-0.00873309	0.0113325	-0.0189325	-0.0290928	-0.00436041	-0.0226548	0.0333894	-0.00232824	0.0260484	0.00403766	0
145.4	-0.0281389	0.0206031	0.00105939	-0.0542914	-0.0214164	0.00276399	0.00790341	0.0493574	0.0297856	0.0132738	0
145.6	-0.0211494	0.0336682	0.0137554	-0.0286668	-0.0139752	-0.0145242	0.0115406	0.00938235	0.00306772	-0.0084867	0
145.8	0.0184649	0.0313724	-0.0137524	0.00887507	-0.0126021	0.00215879	-0.0502901	-0.0341324	-0.00899803	0.00879933	0
146	0.0225233	-0.0290347	-0.0369957	-0.0111537	-0.00632266	0.00333503	0.0253214	0.0155898	-0.023634	0.0107947	0
146.2	0.0264124	-0.0531177	0.0429586	0.0253418	0.02385	-0.00722308	0.0099883	-0.012218	0.0210892	-0.0139743	0
146.4	0.0240655	0.0185997	0.0149911	0.0533129	0.0107629	-0.00822712	0.0356697	-0.0233426	0.0147766	0.0110792	0
146.6	-0.0302403	0.0180443	-0.0193643	0.0143363	-0.00975906	-0.00274325	0.0122347	0.0159507	0.00431922	0.0105928	0
146.8	-0.036732	-0.013721	0.000257292	0.0031476	-0.0103322	0.00607275	-0.0300668	0.0204025	0.0119249	-0.0201732	0
147	0.0405597	0.0187799	0.00241092	0.0460951	0.00128845	0.00165913	0.00126265	-0.0184908	0.00571121	0.0138535	0
147.2	0.0357425	-0.0157828	0.0329461	0.0224391	0.0271418	-0.0209068	-0.028195	-0.0167877	0.0227073	0.0545306	0
147.4	0.00325511	-0.000242758	0.00126642	0.000673102	-0.0156386	0.0073487	0.0215415	0.00928937	-0.00828299	-0.0169566	0
147.6	-0.00597177	-0.00383216	-0.00585361	0.000791788	-0.0499973	0.00894624	0.0596158	0.008706	-0.0347459	-0.023053	0
147.8	-0.00998164	0.00463731	-0.0032438	0.011724	-0.0311791	0.010631	0.012307	0.0293898	-0.062387	-0.00389341	0
148	-0.0169558	0.0216081	-0.0137396	-0.00715757	-0.00762966	0.0149057	-0.0207346	0.0322518	-0.00102733	-0.0149826	0
148.2	-0.00938185	0.0239803	-0.00270347	-0.0189941	0.0152832	-0.00398622	-0.0118351	0.0193946	0.0266245	-0.0169991	0
148.4	0.00573071	-0.00449795	0.0234878	-0.00144415	0.0418105	-0.0155658	-0.0204693	0.00878872	-0.056247	-0.00451538	0
148.6	-0.00294194	-0.0749465	0.00938264	-0.0401048	0.0134018	0.00746635	0.000882637	-0.0647546	0.044515	-0.0121465	0
148.8	-0.00823601	-0.0129451	0.018004	-0.019891	0.0338458	0.00215987	-0.0134922	0.00950155	-0.012315	0.0152481	0
149	0.0245481	0.0490684	0.00622965	-0.0487806	-0.00580015	-0.0112777	-0.0117456	0.00521313	0.000532995	-0.0251909	0
149.2	0.00508216	0.0209346	-0.0260357	-0.0165711	-0.0205075	0.00668723	-0.0248055	-0.0573697	0.0115776	-0.020201	0
149.4	-0.0220548	-0.0337069	-0.0267586	0.0370147	0.0132346	0.00834108	-0.0322181	-0.0301614	0.0139108	0.00618577	0
149.6	0.00682301	-0.0351736	-0.016767	0.0134146	0.0142034	-0.0231363	-0.0340975	0.0326955	0.0402458	-0.00824669	0
149.8	-0.00315225	0.00995582	-0.0282018	-0.00589858	0.00813915	-0.00923151	-0.0423271	-0.000192745	-0.0232437	0.0129592	0
150	-0.0378678	0.0389615	0.0182217	-0.0357411	0.024765	0.046741	0.0665305	-0.0448809	-0.0252142	-0.00868314	0
150.2	0.0403706	0.00515887	-0.0025945	0.00327176	-0.0356558	0.0687768	0.0241279	0.00228729	0.0164195	0.013794	0
150.4	0.0253254	-0.03047	-0.00237334	0.0104501	-0.0115714	0.0186427	0.0451756	-0.0072135	-0.00719745	0.0234274	0
150.6	-0.0370363	-0.0399796	0.024916	-0.0150485	-0.00442877	-0.00846249	0.0064001	-0.0249901	0.00824552	0.00989014	0
150.8	-0.00592304	0.000400284	0.0205038	-0.00204389	-0.0322221	-0.00214313	-0.0481508	0.0067145	0.0337609	0.0056391	0
151	0.037657	0.0477759	-0.0010319	0.0408925	0.0080155	-0.0192824	0.0351103	0.0369132	-0.0227985	-0.00303811	0
151.2	-0.00604342	-0.00425656	-0.00538893	0.0334197	0.00291543	-0.00500851	0.00580787	0.0599239	-0.0255461	-0.0172259	0
151.4	-0.0188591	-0.0366199	-0.00688126	-0.0508242	-0.0135668	0.032443	-0.000959296	0.0255487	-0.0149757	0.0171518	0
151.6	0.00545898	0.0107716	-0.00652009	-0.00498876	-0.00732695	-0.0132681	-0.0241709	0.0576598	0.0220202	0.0152854	0
151.8	0.0153989	0.0128148	0.0200171	0.0132982	0.000179525	-0.0339947	-0.0264656	-0.0139616	0.0586016	0.0152611	0
152	0.0121395	0.0143806	0.0104949	-0.0079875	0.0157638	-0.0159026	0.0110743	-0.0439156	0.0145953	-0.0175715	0
152.2	-0.0110679	0.0395135	-0.0309553	0.0294949	0.0184983	-0.0237492	0.0176372	0.0427835	-0.0543058	-0.0189277	0
152.4	-0.0391646	0.0116246	-0.00607825	0.0442269	-0.0194363	-0.0383585	-0.0108538	0.00955405	-0.0221498	0.0660816	0
152.6	0.00387004	0.0101158	0.0294346	-0.00867804	-0.0287132	-0.0326421	0.0180492	-0.061333	0.0265187	0.0034755	0
152.8	-0.0126071	-0.0367974	-0.039796	0.00279755	-0.00595408	0.00598576	-0.00872611	-0.0434451	-0.0142119	-0.0265159	0
153	-0.0234712	0.00368841	-0.00779441	-0.00387904	0.0351306	0.0180702	-0.0427505	-0.00883977	-0.0275772	0.0215104	0
153.2	-0.00118578	0.0353211	0.00371247	-0.02129	0.00884423	0.0134003	0.0292358	-0.0405515	0.00423397	-0.0118959	0
153.4	0.0229638	-0.0146062	-0.016669	-0.0134263	-0.0154491	0.00938347	0.0780252	0.00766505	-0.00863883	-0.0529958	0
153.6	0.0139127	-0.038675	-0.0012772	0.000438213	0.0212426	0.00250687	0.0135565	0.0810022	-0.0613423	0.00270298	0
153.8	-0.0301294	0.00027538	-0.0353461	-0.00154782	0.00811011	0.00820787	-0.0267553	-0.0253123	-0.0339194	0.0174316	0
154	-0.0306911	-0.00181409	0.0176131	-0.0257852	-0.0152975	0.0229424	-0.0719554	0.036183	0.0622534	0.00988238	0
154.2	0.0177553	0.0116706	0.013335	-0.00770047	-0.00690913	0.00650007	-0.00554849	-0.00986128	0.012284	0.0189229	0
154.4	0.00310893	0.000447286	0.00325952	0.00233755	-0.00396474	-0.0120376	0.030554	-0.0586992	-0.0438363	-0.00820365	0
154.6	0.00148584	0.0019746	0.0156304	-0.0149496	-0.00719343	-0.00287183	0.0288476	-0.0145675	-0.0233785	-0.000710292	0
154.8	0.0315843	0.00230735	0.0405569	-0.00130017	-0.0250892	0.00668261	-0.00912752	0.00452252	0.032388	0.00388826	0
155	0.0255999	-0.0123593	0.0426812	0.037706	-0.0337121	-0.00818394	-0.0871362	-0.0330482	0.0663983	-0.0399623	0
155.2	0.0269919	0.0396675	-0.0241511	0.0161311	0.0295159	-0.0111059	-0.0412607	-0.00560478	0.0406536	0.0100166	0
155.4	-0.0493214	-0.0113296	0.00107555	0.000347027	0.0297413	0.00500975	0.0618695	0.00475472	0.053817	-0.00361158	0
155.6	0.00512472	-0.0309405	0.0118476	0.0469595	0.0196029	-0.0248889	0.0315698	0.00527624	0.0148551	0.00610532	0
155.8	0.0253281	-0.0218752	0.0051865	0.0135932	-0.00157798	-0.00288002	-0.0445886	0.0131785	-0.0155274	0.00502466	0
156	0.0110987	-0.000669426	-0.000510533	-0.0232844	-0.00864552	0.00881548	0.0105143	0.0316009	-0.0188988	-0.00716174	0
156.2	0.0314205	0.00748202	-0.00591228	0.000705972	0.0125054	-0.024166	0.0858019	0.0628183	-0.0275602	0.0142093	0
156.4	-0.00680364	-0.0227025	-0.00360602	-0.0135927	0.0139984	0.00531305	0.00789992	0.0698947	-0.0276261	0.0243184	0
156.6	-0.00633673	0.0112612	-0.0191363	0.0212227	0.00680273	0.0118294	-0.0124236	0.00875783	-0.0339712	-0.0100025	0
156.8	0.036441	0.0227016	-0.000189106	0.0169429	0.0119497	0.0119384	0.0425389	0.00286218	-0.0141522	-0.000517973	0
157	0.000568502	0.0145348	0.000971034	0.0349584	-0.013834	0.0352238	-0.000293639	-0.0179796	-0.0189679	-0.0153778	0
157.2	-0.0148463	0.0118819	-0.0179532	0.0236792	-0.00445729	0.0160525	-0.0641077	-0.0349472	0.00257011	-0.00936301	0
157.4	0.0241315	0.0108281	-0.00983936	-0.0208336	0.0218784	0.0040882	-0.027986	-0.0360634	0.0164263	0.0142879	0
157.6	0.0113576	0.0106396	0.0341488	-0.0166346	-0.00255962	0.0357725	0.0201576	-0.0422993	-0.0187159	-0.0167764	0
157.8	-0.0312749	0.0102785	0.0401359	0.00412729	-0.0126814	0.00192403	-0.0139902	0.00103507	0.0106918	-0.0408208	0
158	-0.00579969	-0.0121253	-0.0490946	-0.036781	0.01921	-0.0171197	0.00786644	0.0679453	0.0780377	0.0150044	0
158.2	0.01185	0.0238378	-0.000801802	-0.0500009	0.00869988	0.0192201	0.0413165	-0.0097419	0.0252315	-0.0210301	0
158.4	-0.00099246	0.0605884	0.0388568	-0.0486889	-0.0268803	0.00254991	0.0143369	0.0126333	-0.0389656	-0.00792254	0
158.6	-0.0279609	-0.00291003	0.00435623	-0.00184017	-0.0453765	-0.0208572	-0.00684695	0.0268936	-0.014919	0.028995	0
158.8	-0.0182377	-0.058541	-0.00995003	0.0464437	-0.0259466	0.0138532	0.00856605	-0.0286093	0.0419796	0.00135036	0
159	0.00917563	-0.0207238	0.00704038	0.00953048	0.00560114	0.0111409	-0.00220252	0.00786072	0.0224622	-0.0192791	0
159.2	-0.0451146	-0.0445117	0.00932958	-0.0180593	-0.00397587	-0.0578476	-0.0296896	-0.0170558	-0.0544511	0.00611832	0
159.4	-0.0420165	0.0130627	0.021806	0.00535917	0.00499793	-0.00153493	-0.0282872	-0.0789527	0.0152502	0.0514653	0
159.6	-0.00540315	0.00434455	-0.0229302	0.010471	0.00950718	0.00967347	0.0377219	-0.00982798	0.0104134	0.0224219	0
159.8	0.0221632	-0.037188	-0.0253812	0.00888381	-0.000403448	-0.0241104	0.0404143	0.0159122	-0.00115711	-0.0351717	0
160	0.00684293	-0.0351778	0.00260497	0.0122265	0.000547315	-0.0340993	0.00106303	-0.0329136	0.0136456	-0.0222379	0
160.2	-0.000700616	-0.0150187	-0.00586857	-0.00513139	0.0171702	-0.0207872	-0.00685954	-0.00572665	-0.0158185	0.0194878	0
160.4	0.038958	0.00231108	0.0007458	-0.0251563	0.0169578	-0.00364538	-0.045444	0.0567826	-0.0299784	0.000481562	0
160.6	-0.00255898	0.0312836	0.00783172	0.00356746	-0.00575706	-0.00681676	-0.0784265	0.0358686	-0.010808	0.00622375	0
160.8	0.0139485	0.0365935	-0.0190105	0.0312957	0.0039788	0.0124739	0.00593224	0.047441	-0.0531251	0.0289895	0
161	0.0269914	0.0331281	-0.0101094	0.0404462	-0.0114813	0.0481982	0.0713405	-0.0113423	0.0171365	0.0204309	0
161.2	0.0142438	0.0170911	0.0171602	0.0202288	0.00548235	0.0217738	0.0420994	-0.0139016	0.0435221	0.0122868	0
161.4	0.00914117	0.0023912	0.0206511	0.000546801	0.0288952	-0.000263292	-0.0351475	0.0181316	0.000363845	0.00066282	0
161.6	0.00786361	0.0124982	-0.0108393	0.00670469	0.00425449	0.0434679	-0.0575708	-0.0305549	0.0185822	-0.0107403	0
161.8	-0.00546002	-0.00298323	-0.0465037	-0.000516012	0.011257	0.0188234	0.0212114	-0.00965256	-0.00605298	0.020914	0
162	-0.0275539	-0.0875214	0.0233193	-0.0277197	-0.0192866	-0.035616	0.0441802	0.026539	-0.00124125	-0.0277561	0
162.2	-0.0260991	-0.0420144	0.0092041	-0.0516467	-0.021381	0.0176593	0.0187563	0.0161967	-0.0219521	-0.0529201	0
162.4	-0.013848	0.0180273	-0.0154298	-0.0266131	0.000507398	-0.0173974	0.00679857	-0.0243738	-0.0288203	-0.00209037	0
162.6	-0.00265484	0.0238685	0.000264553	-0.0206661	0.00311033	-0.0369972	0.0120003	-0.0515488	-0.00410858	-0.00332578	0
162.8	-0.000178707	0.0302506	-0.00541349	-0.02099	0.00563773	0.0063191	-0.00671266	-0.038576	0.014877	-0.0316359	0
163	-0.00934066	0.0326687	-0.0142196	0.0206758	0.0207239	-0.031044	-0.0431731	0.00185666	0.0102401	0.0112961	0
163.2	-0.0104334	0.00907769	0.0309322	-0.0140175	-0.0104852	0.0169171	-0.0267182	0.0201172	-0.00666353	-0.0175864	0
163.4	-0.0133252	-0.0101195	0.0100193	-0.00487658	-0.029161	0.0291146	0.0232101	-0.00372186	-0.00743515	0.00495009	0
163.6	-0.0136343	-0.0528607	-0.0476095	-0.0245812	-0.0304696	-0.0166308	-0.00940996	-0.0184474	0.0447108	0.0153919	0
163.8	-0.00871465	0.0165947	-0.0510369	-0.0127543	0.000935431	-0.0163763	-0.0722773	0.0224356	0.0105768	-0.00802426	0
164	0.019156	0.0362275	-0.016386	0.0223831	0.0174235	-0.0104892	-0.0357497	0.0220234	-0.0447579	0.00993298	0
164.2	0.0322967	-0.0734615	0.00619607	0.011698	-0.0140677	-0.0247606	0.021136	-0.0472588	-0.0238378	0.0346296	0
164.4	-0.0224788	-0.0327034	0.0370702	-0.00184965	-0.0197282	0.0179091	-0.0275985	-0.0322151	-0.0398008	-0.017535	0
164.6	-0.0442135	0.0279194	0.0642354	-0.00138336	0.0238568	-0.000829002	0.00273528	0.0444729	-0.0359622	-0.0154469	0
164.8	0.0042649	-0.0132906	0.0233927	0.00573287	0.0147855	-0.0150729	-0.0189221	-0.00247008	0.0283603	-0.0176096	0
165	0.0143323	0.0166915	0.00531869	-0.0174448	-0.00929637	-0.0100122	0.00116501	-0.0380083	0.0248496	0.00199706	0
165.2	-0.0200722	0.0303703	0.00434877	-0.0107049	-0.00645482	0.0190809	0.00805948	0.00701866	-0.0223309	0.00528292	0
165.4	-0.0208022	-0.00119843	-0.0173383	0.0169801	0.00734169	0.0366622	0.0185669	0.0464588	-0.00746559	0.00675218	0
165.6	0.00927633	0.00870084	-0.0143917	0.0154976	0.008728	0.0054	0.074214	0.0195314	0.0180004	0.0270858	0
165.8	0.0068445	-0.0258911	0.0196283	0.0264675	0.0081136	-0.0230072	0.0264987	-0.0318326	-0.0105312	-0.00379197	0
166	0.0140791	0.01248	-0.0111636	-0.00730654	0.0289396	-0.0178129	0.0377231	-0.0305732	0.08252	0.0289646	0
166.2	0.0285302	0.033655	-0.0269064	0.0110578	-9.22245e-06	-0.0246643	0.0313516	-0.00855521	0.0114665	0.0203495	0
166.4	0.0191648	0.0187301	-0.0388516	0.0151442	0.00353429	0.0297055	0.00268443	0.0167439	-0.060911	-0.0081683	0
166.6	0.0150538	-0.00948311	-0.00717811	-0.000262676	-0.0177393	0.0175419	-0.00636813	0.0344356	0.00570236	0.000831889	0
166.8	0.0131622	-0.0341372	0.01512	0.0123743	-0.0333277	-0.0451148	0.0111956	0.0361442	0.062793	0.0167534	0
167	-0.0111867	-0.0290902	-0.0214382	0.013117	0.0334956	-0.00157512	0.0128485	0.0160532	-0.000820301	-0.000750464	0
167.2	0.00447476	-6.53447e-05	0.0489848	-0.0166767	-0.0403962	-0.0386233	-0.0455434	-0.0244791	-0.0713781	-0.0228395	0
167.4	-0.00224653	0.000927368	-0.0513052	-0.0155565	-0.0237502	0.0173084	-0.0544413	-0.0181243	-0.0265879	-0.0365093	0
167.6	0.00268586	0.0115067	-0.0313436	-0.0319939	0.0207243	0.030304	-0.0182363	-0.0505975	-0.0270608	0.0124843	0
167.8	0.0116753	-0.00378029	0.0373593	0.000717422	0.0325438	0.00344092	0.00946868	-0.0376419	-0.0222949	0.0112052	0
168	0.0277881	-0.0286258	0.00820684	0.00203826	0.0362315	0.01799	-0.00485644	-0.0124925	0.0211275	-0.0357914	0
168.2	0.0283088	-0.0270022	-0.00937281	-0.0523906	0.01485	0.0279351	-0.0290947	-0.0122856	0.0311962	-0.0256633	0
168.4	-0.0368318	-0.0205805	0.0315429	0.00220094	-0.0336681	-0.00894747	-0.0393743	0.0443111	0.0185731	-0.00906812	0
168.6	-0.0561611	0.0373839	0.00425831	0.0120848	0.00208172	0.00297009	-0.0915273	-0.0161913	-0.00695959	-0.0302874	0
168.8	0.00611975	0.0445913	-0.035493	0.0604137	0.0124178	-0.0109892	0.00764994	0.0501245	-0.00321776	0.015274	0
169	0.0220148	0.0260696	0.0199479	0.0620163	-0.00854463	0.00136517	0.0657817	0.0560091	0.049608	0.0398905	0
169.2	-0.00501005	0.017245	0.0518197	0.00908877	-0.0129105	0.0347261	0.0511098	0.0115495	0.011908	0.0221539	0
169.4	-0.00748772	-0.000676358	-0.00545358	0.00271806	-0.00499501	0.021289	0.0450264	0.0184976	-0.0381239	0.0196341	0
169.6	0.00557467	-0.0149558	-0.0145785	0.0255904	-0.00710043	-0.0209545	0.0189385	0.0121096	0.0185882	0.0248749	0
169.8	0.0117564	0.00861431	0.0402874	-0.0185514	-0.0111188	-0.00467552	0.00279691	0.00852576	-0.00965693	0.00439104	0
170	0.00697393	-7.13809e-05	-0.013477	-0.00914003	-0.0275459	0.0472984	0.0642313	0.046121	0.031507	-0.00215347	0
170.2	0.00451084	0.0449769	0.00516124	-0.0123461	-0.00520131	0.00605004	0.0467806	-0.0180078	-0.00593227	0.00248694	0
170.4	-0.0168469	0.0154262	0.00523878	-0.0129945	0.0100533	0.0272061	-0.0196361	-0.0323202	0.0238057	-0.00398322	0
170.6	-0.00188413	0.0110467	0.00930002	-0.0228815	0.0169988	0.059527	-0.0126146	-0.0171226	0.0483765	-0.0185412	0
170.8	0.0365948	0.0460706	0.0595813	-0.023305	0.0185671	-0.0045999	0.0280448	-0.0441384	-0.0287079	-0.0198027	0
171	0.0107108	-0.0472901	0.0211853	0.0206654	-0.000746257	-0.0343168	-0.00679156	-0.00743802	-0.0393566	-0.00796174	0
171.2	-0.000532223	-0.0165163	-0.033217	-0.00355022	0.0275623	-0.0154374	-0.0510761	0.0293651	-0.0200783	-0.00864502	0
171.4	-0.00921813	0.0349579	-0.000889758	0.0214286	0.00224256	-0.0239892	-0.0698415	0.042763	0.0149609	-0.00857607	0
171.6	-0.0136697	-0.0192038	0.0110984	0.0108244	-0.00686335	-0.0266383	-0.0149003	0.00458328	-0.0329465	0.028213	0
[truncated: 377 more rows]

## Sheet: SEM
Time	gamma-5	gamma-4	gamma-3	gamma-2	alpha	stimulus
[truncated: 101 more rows]

[truncated: 1 more sheets: Average_left_right _combined]
