# Supplementary material for: Multiphoton imaging of neural structure and activity in Drosophila through the intact cuticle
Source: eLife. 2022 Jan 24;11:e69094. doi: 10.7554/eLife.69094 (PMC8846588; doi:10.7554/eLife.69094)
Supplement: Figure 7—source data 3. [file elife-69094-fig7-data3.xlsx]

## Sheet: Long_term_8hr
20200806	fly1
20200807	fly2
20200813	fly3

## Sheet: fly1
Time	gamma-L5	gamma-L4	gamma-L3	gamma-L2	alpha-L	gamma-R5	gamma-R4	gamma-R3	gamma-R2	alpha-R	stimulus			Time	gamma-5	gamma-4	gamma-3	gamma-2	alpha	stimulus
0											0			0	0.00940518	-0.00828297	0.0122106	-0.000937838	0.00920496	0
0.2											0			0.2	0.0185675	0.00699612	0.0100417	-0.00141345	0.0155032	0
0.4											0			0.4	0.000246045	0.00951393	0.00317784	0.0133724	-0.000783618	0
0.6											0			0.6	0.00226117	0.00588776	-0.0103293	0.00749726	-0.00877886	0
0.8											0			0.8	-0.00414567	0.00489177	-0.00628165	-0.0167018	-0.0106839	0
1											0			1	-0.00386694	0.00495686	-0.0138814	-0.0141408	-0.00451163	0
1.2											0			1.2	-0.00698578	0.0297291	-0.027387	0.011679	-0.000835194	0
1.4											0			1.4	-0.00790619	0.0283463	-0.00553349	0.022787	-0.00504737	0
1.6											0			1.6	0.0233111	-0.000622231	0.00514797	0.0128867	0.00256478	0
1.8											0			1.8	0.00565012	0.00972374	-0.00180195	0.0219206	-0.00186695	0
2											0			2	-0.00140874	0.0138058	0.00846702	-0.00185209	0.00475479	0
2.2	0.0206383	0.00108727	-0.0263849	-0.0414717	-0.0102539	0.000406844	-0.0405416	0.00427682	-0.0182581	0.00316807	0			2.2	0.00440462	-0.00555615	0.0121376	-0.0235157	0.00694462	0
2.4	-0.00615418	0.0153655	-0.0526283	-0.0281672	0.00320338	-0.00805407	-0.0133542	-0.021494	-0.0147401	0.0182448	0			2.4	0.00108128	-0.0230682	0.00898341	0.00680936	-0.000385787	0
2.6	-0.0314245	0.0135086	-0.0287412	0.0334655	-0.00532264	-0.00529914	-0.00568429	0.0109196	0.000491791	0.00570833	0			2.6	-0.0181647	-0.0316903	0.00346525	0.00506291	0.000568721	0
2.8	-0.00279199	0.0104692	0.0197837	-0.00331677	-0.0100121	-0.0061432	0.0342974	0.013488	0.00593414	0.0215396	0			2.8	-0.0179212	-0.0217534	0.0165895	-0.00916554	0.00304534	0
3	0.00400376	0.00499723	0.0206474	-0.00409688	-0.0173558	-0.0170108	0.0498279	-0.00630048	-0.0138121	0.0118555	0			3	0.00709566	0.000869672	0.00943959	-0.0153569	-0.00189638	0
3.2	0.0368016	0.0177079	-0.0306493	-0.0482372	-0.00371429	0.00554659	-0.0531132	-0.0540357	-0.0223652	-0.0126145	0			3.2	0.00696213	0.0138663	0.0197586	-0.0221436	-0.000827355	0
3.4	0.0501142	-0.001838	-0.0086234	-0.0187394	0.0202874	0.00999872	-0.0412301	-0.0405793	-0.00339243	0.00916211	0			3.4	0.00071169	-0.0109815	0.0143734	-0.0140924	0.00575092	0
3.6	-0.00231929	-0.0185321	0.022445	0.0313166	0.01766	0.00224702	0.0374372	0.00312388	0.00265623	0.0344833	0			3.6	0.00320759	0.000635917	-0.000174578	-0.010468	0.00230245	0
3.8	-0.0301076	0.00225079	-0.0169554	0.0111962	0.0148382	0.00604982	-0.0133079	-0.00453168	-0.00816436	0.0132383	0			3.8	0.000375871	-0.00240982	0.00291142	-0.00997606	-0.00600417	0
4	0.0299545	-0.0297893	0.0361874	0.0780119	0.047766	-0.0368037	-0.0198142	0.00769992	0.00588953	0.00697754	0			4	0.0135323	0.00395688	-0.000136151	0.00512852	0.00165225	0
4.2	0.0390239	-0.0390251	0.0824835	-0.00562824	0.0120321	-0.0241668	-0.0410604	0.0170747	-0.0100343	-0.0123216	0			4.2	0.0230029	0.0243853	-0.0144137	0.0164346	0.00633204	0
4.4	0.0131838	-0.00343222	0.00564588	0.00276222	0.0134311	0.0260291	0.0337574	0.0340393	0.0294537	-0.0180003	0			4.4	0.000875849	-0.00622072	-0.0174461	0.00271246	0.0134129	0
4.6	0.00447525	0.0630005	0.00325996	0.071506	0.0241267	0.0171354	0.0666188	0.0183433	0.020843	-0.0431409	0			4.6	0.00613534	-0.00179206	-0.0188051	-0.0136897	0.00175261	0
4.8	-0.00245568	0.0720755	0.0319117	0.0486857	0.0101436	-0.0126517	0.0202317	0.0156919	-0.00581676	-0.0115871	0			4.8	-0.0109	0.00543521	0.00860465	0.0222641	-0.0158194	0
5	-0.00152009	0.01639	-0.00241297	-0.0332418	-0.00913537	0.00470229	0.00702046	0.0281535	0.00475616	0.0286025	0			5	-0.0146796	0.00694339	-0.0179961	0.0121085	-0.0120434	0
5.2	0.00339417	-0.0268749	-0.00370385	-0.0663321	-0.02314	-0.000870552	-0.00968765	-0.0123118	0.00838324	-0.0198558	0			5.2	-0.00686541	-0.00352255	-0.0196975	-0.00566432	-0.00863945	0
5.4	-0.0488245	-0.0513201	0.00257753	-0.0755407	-0.0241675	-0.0665085	-0.119941	-0.036466	0.0363714	0.0118737	0			5.4	-0.00138573	0.00874911	-0.00208078	-0.00338914	-0.0141845	0
5.6	-0.00603948	0.0154757	-0.00572149	-0.0735445	-0.0157191	0.0118969	-0.0515391	-0.00246231	0.00247777	-0.000866814	0			5.6	0.00685427	0.00920191	-0.00738479	0.00792732	-0.0160153	0
5.8	-0.00645343	-0.0227542	-0.0564322	0.00563198	0.00125319	0.0140796	-0.0143079	-0.0142562	-0.0153398	0.0183489	0			5.8	-0.0126061	-0.000356517	-0.00584976	0.0134656	-0.00269423	0
6	-0.0407718	-0.0402098	-0.0260092	-0.0181848	0.00477805	0.0210802	0.0126025	-0.0187283	-0.0163641	0.00660239	0			6	-0.00157145	-0.00951828	-0.0119097	-0.00368126	0.0100574	0
6.2	-0.0189699	-0.0227418	0.0208881	-0.0445899	-0.010867	0.0420863	0.0261021	-0.00934512	-0.0279519	-0.0098695	0			6.2	0.000219589	-0.015283	-0.000271149	-0.00429403	0.0165795	0
6.4	0.00779488	-0.0454026	-0.0387824	0.0252087	-0.024466	-0.013527	-0.0261584	-0.044449	-0.0238495	0.0295512	0			6.4	-0.0162704	0.00312087	0.020306	-0.00507682	0.0104461	0
6.6	-0.0149097	-0.0246098	-0.0673482	-0.00907889	-0.0142248	-0.0283408	-0.0116713	-0.0431221	0.00367206	0.0341546	0			6.6	-0.00739997	0.00669035	0.00231865	-0.00925874	0.00593296	0
6.8	0.0224485	-0.0463125	0.0298332	0.0197393	0.016305	0.00732478	0.0595442	0.0625177	0.00260893	0.0169875	0			6.8	-0.0169321	-0.00750892	-0.00606933	0.015607	0.00206819	0
7	-0.0200035	0.0176135	0.0464795	0.0628259	0.0125873	-0.0111875	0.0211955	0.0240056	-0.0252788	-0.0109222	0			7	-0.0245191	-0.0181568	0.00803849	0.013317	0.02467	0
7.2	-0.0219947	0.0166111	-0.0128993	-0.0120196	0.0304917	0.00177905	-0.0018443	-0.0220753	-0.0346645	-0.0140676	0			7.2	-0.0109182	-0.0103349	0.0132915	0.0131661	0.0168609	0
7.4	-0.00759349	-0.0233918	-0.032616	-0.0178156	0.00677404	0.00535085	-0.00756777	-0.00172079	-0.00371429	-0.00756993	0			7.4	0.000214539	0.000545386	-0.00501452	-0.00533767	0.014922	0
7.6	-0.0154829	-0.0185665	0.00318851	0.0441118	-0.0204823	-0.020595	-0.00915505	0.01047	0.00605168	-0.0216167	0			7.6	-0.00821222	0.0164689	0.014555	-0.0159123	0.0309198	0
7.8	0.007731	-0.00145386	0.0210995	0.00826918	0.0238801	0.00145218	0.010608	-6.22558e-05	-0.0309007	-0.0319742	0			7.8	-0.0135567	-0.000951699	0.0194384	0.008103	0.0364062	0
8	0.0114327	0.0216231	-0.00720229	0.0108737	0.018937	0.0247282	-0.0304912	0.000844826	-0.0174663	-0.0117593	0			8	0.00120427	-0.00241925	0.00590082	0.0199748	0.0236482	0
8.2	-0.00344189	0.0136871	-0.0351936	-0.00164505	0.0285525	-0.0157111	-0.0155299	-0.00954279	0.0428611	-0.0167573	0			8.2	0.0195105	0.011393	0.0301352	0.0107696	0.0161764	0
8.4	0.0179474	0.0280126	-0.0164796	-0.0019263	0.00292007	-0.0140903	0.016924	-0.00886082	0.0695945	0.00321365	0			8.4	0.00263244	-0.0149963	0.022754	0.0262351	0.0381283	0
8.6	0.0297272	0.000109248	0.0168034	0.00973249	-0.0123592	0.0291242	0.0616496	0.00402224	0.0315113	0.0119139	0			8.6	0.00187118	0.000673694	0.010539	0.035852	0.031852	0
8.8	0.0474632	0.0220457	0.0569381	0.0129918	0.00804484	0.0535136	0.0746252	0.00407245	0.015085	0.000640821	0			8.8	-0.00378879	0.00307074	0.030199	0.0400554	0.0260721	0
9	0.0478292	0.0939096	0.0594726	0.0167754	0.0131596	0.0418491	0.0281512	0.0155469	0.0240516	0.000499093	0			9	-0.0136773	0.00287513	0.0230574	0.0148652	0.0292352	0
9.2	-0.00989808	0.0495696	-0.0160115	0.028128	-0.0120633	-0.00604058	-0.011054	0.0371232	-0.0100753	0.00347599	0			9.2	0.00336644	0.0090342	0.0139206	0.0106525	0.0291626	0
9.4	0.00670656	-0.00382114	-0.0315033	0.019658	-0.0185462	-0.0732253	-0.010043	-0.00882053	0.00547832	-0.00583356	0			9.4	-0.000490242	0.00449579	0.0234669	0.0299144	0.0229975	0
9.6	-0.00496267	-0.012789	0.0537198	0.0129613	-0.0213285	-0.0260293	-0.0203159	0.0334571	0.0357508	-0.0179683	0			9.6	-0.0106979	0.0152682	0.0146876	0.02791	0.0288578	0
9.8	-0.0426146	-0.0109171	0.0543855	0.00153114	0.0148612	-0.002227	0.00117738	-0.000350378	-0.0117642	-0.0120933	0			9.8	0.0114803	0.022248	0.0356934	0.0282426	0.0310949	0
10	-0.0224938	-0.00112414	-0.0139333	0.00110007	0.00252009	-0.00984076	-0.0065048	-0.0416662	-0.0397315	0.00303306	0			10	0.0307765	0.020406	0.0380738	0.0430771	0.0500089	1
10.2	0.0134224	0.0121698	-0.0246851	-2.9004e-05	-0.0382362	0.0239087	-0.00303636	-0.0238908	0.00533704	-0.00673552	0			10.2	0.0956417	0.0738819	0.0965925	0.0809893	0.0984479	1
10.4	0.00212891	0.0177899	-0.00438077	-0.00566874	-0.0224122	0.0523226	0.0373278	-0.00377636	0.0257597	-0.0179635	0			10.4	0.14327	0.124358	0.144604	0.109404	0.111385	1
10.6	-1.42296e-05	0.01293	-0.0219774	0.0101017	-0.00108705	0.0118819	-0.0068796	0.0329587	-0.0156176	0.00586942	0			10.6	0.128001	0.13527	0.152288	0.123314	0.113621	1
10.8	0.00173945	-0.0197167	0.0344956	0.00742546	0.0150902	-0.00392233	-0.0292164	0.0473288	-0.0261887	-0.0200966	0			10.8	0.0880136	0.13093	0.120228	0.0810891	0.105379	1
11	0.0167071	0.0185708	0.0178628	0.0330534	0.022478	-0.00862029	0.00594592	0.0186711	-0.0279935	-0.00602546	0			11	0.0683626	0.136291	0.0984691	0.0916066	0.0931713	1
11.2	0.0222857	0.0117898	-0.00101574	-0.0210866	-0.0208298	0.00229289	0.00187238	0.0128425	-0.0199562	0.00972462	0			11.2	0.0788653	0.0919921	0.0950248	0.107677	0.0744859	1
11.4	0.0283434	-0.0138204	0.00707784	-0.0377828	-0.0289388	0.0192216	0.0122802	-0.00775992	0.010819	0.036281	0			11.4	0.0646621	0.0726041	0.0891445	0.0822893	0.0507353	1
11.6	0.0326081	0.00891514	-0.0155112	0.00818502	0.00691349	0.00789627	0.022423	-0.035754	0.00365987	0.0406364	0			11.6	0.0295173	0.0894837	0.0662756	0.0800786	0.050858	1
11.8	0.0151953	0.0198217	-0.0332188	0.001317	-0.00692753	-0.0159736	-0.0278657	0.000975614	-0.0335682	-0.00995112	0			11.8	0.0202904	0.0468158	0.0449913	0.0809117	0.0356791	1
12	-0.00779352	0.00232422	0.00945808	0.0259624	-0.0128864	0.00225323	-0.00471008	0.0235417	0.0240671	-0.00034866	0			12	0.02582	0.04337	0.034423	0.0379824	0.00973622	1
12.2	-0.0461598	-0.00302781	-0.0220721	-0.0312138	0.0386388	0.00692027	0.0064492	-0.0319757	0.0339545	0.00122447	0			12.2	0.00247451	0.0527943	0.0403371	0.027929	0.0295076	1
12.4	-0.0498795	-0.0562874	-0.0297748	-0.0491086	0.0369243	-0.0027003	-0.00107239	-0.0262295	0.0217547	0.0135455	0			12.4	-0.00192185	0.0413238	0.0639294	0.033298	0.0214939	1
12.6	-0.0349704	-0.0785927	0.0202014	-0.0162483	-0.0115028	0.00862136	-0.0458223	-0.0356529	0.00531547	-0.0187171	0			12.6	0.00874279	0.0329357	0.0297588	0.0268095	0.00116048	1
12.8	0.00409247	-0.0462808	0.0144126	0.0124523	-0.033543	-0.0202021	-0.0517848	-0.00875469	-0.01343	-0.0264594	0			12.8	0.006239	0.0196817	0.00325502	-0.00710332	-0.00288913	1
13	0.019772	-0.0129238	-0.040376	0.017673	-0.00453502	-0.0559931	-0.0238905	0.0442706	-0.0179592	0.0126926	0			13	-0.00748308	0.0312798	0.00590692	-0.00289021	-0.0102631	0
13.2	-0.0207467	0.01982	-0.00225299	-0.00266825	0.0317147	0.000245685	-0.0274943	-0.00642467	-0.000656704	0.00393377	0			13.2	-0.0154868	0.011588	0.00817544	0.00859035	-0.00904331	0
13.4	0.0281096	0.0388476	0.0580275	-0.0150773	0.0153412	0.00396643	0.0643853	0.0422766	0.0200435	0.0279587	0			13.4	-0.0132992	-0.00528407	0.00553439	0.000237682	-0.0184546	0
13.6	-0.00808111	-0.00427207	-0.000202175	0.0488793	-0.00260605	0.0114393	0.0308544	0.0335445	-0.00689427	-0.0203296	0			13.6	-0.00401784	0.0120927	0.0390992	-0.0153187	-0.0220137	0
13.8	-0.0272907	-0.0031475	-0.0406246	0.0204418	0.00715324	0.0087924	0.0332007	-0.00164113	-0.0138109	-0.0086725	0			13.8	0.00137044	0.00101383	0.0116874	-0.0265586	-0.0204934	0
14	0.0138421	-0.00400518	0.00460653	-0.00868057	-0.0237096	0.0135894	0.0563594	-0.00310316	-0.0168727	0.0069009	0			14	-0.0134375	-0.00131876	0.00762177	-0.0142644	-0.0363428	0
14.2	0.0184677	-0.000566255	0.0138668	0.0266911	-0.0193822	-0.00362556	0.0223644	-0.00778704	-0.0256172	-0.0192363	0			14.2	-0.0213502	0.0240448	0.0292275	-0.00615178	-0.0353597	0
14.4	0.00159054	0.0392911	-0.017775	0.00783079	0.0444415	-0.0405493	-0.0205377	-0.0479761	-0.00484937	-0.0116526	0			14.4	-0.00828761	0.00888127	0.0353448	-0.00877874	-0.0207741	0
14.6	0.0413825	0.0158114	0.0221476	-0.0638334	-0.00319443	-0.00507297	-0.0454565	-0.0577313	0.0102597	0.00114098	0			14.6	0.00772997	-0.000283054	0.0102808	-0.00970151	-0.0242342	0
14.8	-0.0189897	0.00871975	-0.0554974	-0.0624441	-0.015907	0.00712912	-0.0358568	0.0154619	-0.0139252	-0.0174492	0			14.8	0.0129043	-0.00126163	-0.0123268	-0.00567751	-0.0203702	0
15	-0.00984697	0.0097581	-0.045033	0.0512642	-0.00995192	-0.00994105	-0.016723	0.0234801	0.0222291	0.0138468	0			15	-0.0105975	-0.00127778	-0.00475686	-0.0148729	-0.0136015	0
15.2	-0.00966566	-0.0282241	0.0478974	0.0333257	-0.00488381	-0.027824	0.00602617	-0.0159446	0.0271438	-0.0131323	0			15.2	0.00301009	0.0239926	-0.00770847	-0.0111002	-0.0267377	0
15.4	-0.0196686	-0.0259304	0.0535027	0.00228856	0.0075467	-0.0420484	-0.0076718	0.00396138	0.000139585	-0.0357149	0			15.4	0.00542405	-0.010494	0.00230133	-0.0212149	-0.03931	0
15.6	-0.00371368	0.0349139	0.0113436	0.0432572	0.0284081	-0.0158979	-0.0144893	0.0261677	0.00340973	0.0200419	0			15.6	0.0064095	-0.0323499	-0.012189	-0.0238389	-0.0293015	0
15.8	0.00981205	0.0408275	0.0350255	0.00422267	0.0452406	0.0376228	0.0365475	-0.01769	0.0142423	0.0521475	0			15.8	-0.00640845	-0.0146098	-0.023708	-0.0134804	-0.0270199	0
16	0.0549216	0.00613363	-0.00384337	-0.00598068	0.0365497	0.00375796	0.0305743	0.0031974	0.0109098	0.0238611	0			16	-0.0211801	-0.00375143	-0.012834	-0.00528978	-0.000764726	0
16.2	0.000984581	0.0444322	-0.0491259	-0.0228977	-0.0131772	-0.00648204	0.00482438	-0.000468868	-0.0112689	-0.0334861	0			16.2	-0.0134294	-0.0238047	-0.0156715	-0.00775002	-0.00096864	0
16.4	-0.0263945	-0.0152844	-0.00232525	-0.00823433	-0.0377078	0.0400017	0.0147826	0.0257419	-0.0186899	-0.0229921	0			16.4	-0.0074305	-0.0130327	0.00309574	-0.0246401	-0.0178262	0
16.6	0.00875974	-0.0439162	0.0296673	-0.00804509	-0.0138067	0.0308499	-0.0572818	0.0235345	0.00845002	-0.0105637	0			16.6	-0.00157486	-0.000440406	-0.0104408	0.0135316	-0.00358865	0
16.8	0.00647898	-0.00979514	0.00887682	-0.0193994	0.00782464	-0.00205769	-0.104653	0.00403124	0.0016035	-0.0111861	0			16.8	0.00306808	0.00277758	-0.007484	0.0163048	0.00651473	0
17	-0.0343103	-0.0325801	0.00205878	-0.0166845	-0.0051759	0.0223774	-0.00850511	-0.00586213	-0.0234828	0.00964292	0			17	0.00188736	-0.00107959	0.0146824	-0.014652	0.00169318	0
17.2	-0.0158081	-0.0450383	-0.018609	-0.0299616	-0.0220333	0.036528	0.0339412	-0.0354891	0.0200203	0.0232668	0			17.2	-0.00213129	-0.00695826	0.0112902	-0.0141849	0.00126385	0
17.4	0.00557312	0.0242269	-0.0746987	-0.0133492	-0.0191332	0.0224393	-0.0279493	0.0161232	0.0180579	0.0417011	0			17.4	0.000893589	0.00295485	0.00939287	0.000999059	0.000776915	0
17.6	-0.0157454	0.00686927	0.00358558	0.033895	0.00516484	0.0414864	0.0551522	-0.00631714	0.0275571	-0.00699971	0			17.6	0.00875306	0.00379922	-0.018983	0.0106466	-0.0131296	0
17.8	-0.0128821	-0.0182642	-0.0056339	0.00732224	-0.00299952	0.012974	0.0647504	-0.00760332	-0.00662872	-0.0132337	0			17.8	-0.00569776	0.0231406	-0.00953451	0.00952083	-0.00801729	0
18	0.0239542	0.0266639	-0.00147856	-0.0281032	-0.0111888	-0.0134585	0.00461658	-0.00268641	-0.00536988	0.00835363	0			18	-0.00626922	0.0159131	0.00198675	-0.0150033	-0.00374018	0
18.2	0.0307264	0.0239487	0.0289591	0.00815126	0.00373761	-0.028576	0.0031889	0.0103398	0.023076	0.0167772	0			18.2	-0.00573371	0.0122229	-0.00988748	-0.0071579	-0.00432949	0
18.4	0.0117232	-0.0278535	-0.000176842	0.036941	0.00367905	-0.0429569	0.0186996	0.0490673	-0.00965507	0.0276674	0			18.4	-0.00683322	-0.000684956	-0.0306116	-0.00387771	-0.00508118	0
18.6	0.0270248	0.0416932	0.0791985	0.00290601	-0.00517618	0.0279586	0.0151688	0.008428	-0.0229486	0.0120498	0			18.6	0.00321324	-0.000686883	0.00241579	-0.0116545	0.000985966	0
18.8	0.0021017	0.00988215	0.00602093	0.035276	0.00991696	0.0132957	0.0223734	0.0128931	-0.0223559	-0.00361422	0			18.8	0.00441364	0.00176147	0.0311499	-0.0078573	0.000379965	0
19	-0.00365763	0.00338214	-0.045871	0.0502368	-0.00663821	-0.0102557	-0.024485	0.00817536	-0.0121394	-0.0345071	0			19	-0.01074	0.00499795	0.00342962	-0.00568919	-0.000687544	0
19.2	-0.0205781	-0.0187828	-0.0206615	-0.0252824	0.0148692	0.0015949	0.0268446	-0.0274617	-0.00678142	-0.0196244	0			19.2	-0.000816005	-0.00348339	-0.0120643	0.0092915	-0.00906442	0
19.4	-0.0062852	-0.0386833	0.031742	-0.0466894	0.037036	0.00656997	0.045368	0.0285096	0.0113546	0.000671144	0			19.4	0.00532954	-0.027746	0.0108	0.00265894	0.00460182	0
19.6	0.0358236	-0.0109093	0.0439395	-0.00113576	-0.00456325	0.00283389	-0.0345495	0.0750964	0.0252354	-0.0149441	0			19.6	-0.0113307	-0.0201157	-0.00292733	0.00388321	0.00933359	0
19.8	0.0174076	-0.00228576	-0.00642863	-0.0104096	-0.0350001	0.00825854	-0.0175407	-0.03766	0.00167292	-0.000997388	0			19.8	1.38811e-05	-0.00459485	-0.0162458	0.000514962	-0.00594383	0
20	-0.00564345	-0.018352	-0.0176499	0.0302889	-0.00990696	-0.0204065	-0.0167032	-0.0402775	0.000209712	0.0254253	0			20	0.0180218	-0.00177872	0.00442015	-0.000115299	-0.00749859	0
20.2	-0.0283546	-0.028219	0.0109579	-0.02033	-0.0233828	-0.0205222	-0.0873652	-0.0433508	0.0209695	-0.0358778	0
20.4	-0.0212931	-0.009847	-0.0048074	-0.0201584	-0.0179334	-0.0272341	-0.0258217	-0.0369496	0.0123224	-0.00546923	0
20.6	-0.0125513	0.0311386	-0.0167866	-0.0157808	0.0109113	-0.0229965	0.0239599	-0.0337723	-0.0447865	0.0151598	0
20.8	-0.0153888	0.0371136	-0.0231198	-0.0363305	0.0119477	-0.0261439	0.0102484	-0.0120952	-0.0513572	-0.0121764	0
21	-0.00308437	0.0285119	-0.0353894	-0.0323194	0.00266605	-0.0310891	0.0162135	0.0121891	-0.000730349	-0.00797067	0
21.2	0.0101817	0.0571043	0.000232712	-0.0282715	0.020198	0.0130863	-0.00708489	-0.0270181	-0.00969356	-0.0130773	0
21.4	-0.0114256	-0.0100669	-0.000314074	0.0119677	-0.00231917	-0.000239519	0.0248036	-0.00901111	0.00755603	0.0181963	0
21.6	0.0233312	-0.012011	-0.000795418	-0.0119854	-0.00617626	0.00801715	-0.00945945	0.00487485	-0.0283537	0.00542573	0
21.8	0.0273963	0.00717946	-0.00450356	0.0276338	-0.00116078	0.0200944	-0.00363276	0.017551	0.00911219	0.0168041	0
22	-0.00384625	-0.0201231	0.0139174	0.0444724	-0.00212909	0.0235576	-0.0279277	0.0431688	0.0496961	0.00304222	0
22.2	-0.000664002	-0.0187463	0.00684647	0.0196324	0.000698592	0.0168697	-0.0366604	0.0438147	0.0269939	-0.0211426	0
22.4	0.0260928	0.0357177	-0.0472976	0.0287138	0.0124894	0.0203473	0.0625944	0.0129018	0.0306244	0.0222452	0
22.6	0.01081	0.00978934	-0.00315987	-0.0399886	0.0236375	0.0496055	0.044985	0.00463609	0.0427718	0.032791	0
22.8	-0.0393833	-0.0476529	0.0696381	0.010277	0.0127248	-0.0343849	0.0281536	-0.0120876	0.0223063	0.0331596	0
23	0.0382678	-0.014739	-0.00783147	0.0756288	0.00397981	0.0325373	0.0223978	-0.0159756	-0.02904	0.0286743	0
23.2	0.0284684	-0.00422878	-0.0085578	0.0222834	0.0105204	0.0270409	0.0155736	0.00112282	-0.0338188	-0.0203934	0
23.4	-0.0411064	-0.0197289	0.0558685	-0.0138955	-0.000699272	-0.0327891	0.0211188	0.00576925	-0.0221987	-0.0464563	0
23.6	-0.00962173	0.0103091	0.0143534	0.0196594	-0.0218497	0.00328211	0.0160616	-0.0176605	-0.0354539	-0.0224246	0
23.8	0.021697	0.0405682	-0.0505219	-0.0290958	-0.0205953	0.00214329	-0.00368067	-0.031585	-0.0218761	-0.0211901	0
24	0.00587108	0.0369342	-0.0508405	-0.0713855	-0.0397407	-0.00309161	0.0259782	-0.0130881	-0.00227625	-0.00632282	0
24.2	-0.00849022	-0.037671	0.00786602	-0.0312087	-0.0211406	0.00816963	-0.0234199	-0.011645	-0.023846	-0.00820161	0
24.4	0.0193007	0.0378287	-0.0216446	0.0041896	-0.00843972	-0.00130335	-0.0306999	0.0206958	0.0296805	0.00630684	0
24.6	0.008034	0.0342024	0.0106015	0.0197059	-0.00744283	-0.0182334	-0.0277324	0.0230977	0.0410204	-0.0154284	0
24.8	-0.0112036	-0.0356209	0.0395578	0.00593708	0.0162752	-0.009604	-0.0554478	0.0253698	-0.0147857	-0.0224743	0
25	0.00309178	0.0195482	-0.00960282	-0.0262782	0.0399046	0.0128842	-0.0438252	0.0460951	0.00355468	0.0363544	0
25.2	-0.0293485	-0.000915424	0.0604435	-0.00253347	0.00896428	0.00445598	0.000697043	-0.0198097	0.0495294	0.0392573	0
25.4	-0.00443567	-0.0411576	-0.0268294	0.0172019	-0.0218356	-0.0361912	0.00625943	-0.013833	-0.00215865	0.0126798	0
25.6	-0.0180774	-0.0484223	0.0249292	0.00344119	0.0361654	-0.0024959	0.0229229	0.026446	0.00886336	0.0154345	0
25.8	-0.0343665	-0.00136663	0.0492615	-0.0118137	0.0111224	0.0144255	0.0677909	0.00246215	0.0165397	-0.0213732	0
26	0.0284117	0.0202723	0.0129897	0.0700564	-0.0316208	0.0186429	0.0303664	-0.00322946	0.017759	-0.0417394	0
26.2	0.0721084	0.0109995	0.0121332	0.0780818	0.0044774	0.0106507	0.00634287	0.0382865	0.01143	-0.00813745	0
26.4	0.0245323	0.0410064	-0.00144677	-0.0730136	0.014404	-0.0352514	0.0612641	0.0213856	-0.0333978	0.0104607	0
26.6	0.0341058	0.0480172	-0.0287367	-0.00357727	-0.00738897	0.00148364	-0.0552151	-0.0257443	-0.00946518	0.0187385	0
26.8	-0.0148683	0.000230675	-0.0643757	0.0267828	0.0139627	0.0395758	-0.00958407	-0.0253411	0.0113737	-0.0107553	0
27	-0.0318693	0.00388045	-0.0377287	0.0151125	0.0268445	-0.00630335	-0.00698049	-0.0136606	-0.0155018	-0.0279006	0
27.2	-0.00239569	0.00907879	-0.0305222	-0.00963894	0.0044879	-0.040272	-0.0263076	-0.0238124	-0.0246673	-0.0127948	0
27.4	0.0020176	-0.00531208	-0.0154956	-0.0566818	-0.0238393	-0.0263036	0.00376618	-0.0208935	-0.0118583	0.0193862	0
27.6	-0.0187728	-0.0267914	0.0167824	-0.066273	-0.0140075	-0.00448477	0.00628621	0.0039537	-0.0102107	0.0266231	0
27.8	-0.00979911	-0.0458514	-0.0145561	-0.00866734	0.0149803	0.0201654	-0.0373303	-0.00163395	0.00128782	-0.00535844	0
28	0.000347193	0.0266933	0.0228618	-0.0115745	-0.020844	0.0249418	-0.0282618	-0.0227672	0.00663923	-0.00409819	0
28.2	-0.0126711	-0.0307576	0.00350236	0.00101669	-0.0227825	0.0626049	0.0637825	0.00716768	-0.0243934	0.00455576	0
28.4	-0.00989462	-0.029761	-0.034941	0.0175313	-0.0113613	-0.018406	0.00828275	0.00772997	-0.0130302	0.0068914	0
28.6	-0.0142417	0.00602687	-0.0153179	0.00986544	0.0121601	-0.0449121	-0.0329632	-0.0340235	0.0158787	-0.0135842	0
28.8	-0.0149868	-0.01573	0.0388159	-0.0308615	0.0199435	-0.0101049	-0.0217934	-0.0517888	0.017263	-0.0404607	0
29	0.00987948	-0.0361273	0.0522434	-0.0316763	-0.00323026	-0.0405694	-0.0553948	-0.0460051	-0.00198894	-0.0337565	0
29.2	0.00827329	-0.0210282	0.0131078	0.0583172	0.00901956	0.0117074	0.0195276	-0.0543752	-0.030434	-0.00216155	0
29.4	0.00692245	0.0469896	-0.00470653	0.0177375	0.00841752	-0.007951	-0.00541822	0.00691507	-0.0106712	0.0119415	0
29.6	-0.00802674	0.0296131	0.0314214	0.0162805	0.00439781	-0.0174486	-0.0549252	0.0759618	0.0043795	0.0224829	0
29.8	0.00350111	-0.0233239	0.0428281	0.060148	-0.00279741	-0.00437428	-0.017512	0.0691258	0.029076	0.00439591	0
30	0.0227452	-0.00793041	-0.0219849	0.0299921	0.0173467	0.0152911	0.0612505	0.0281984	0.0179596	-0.00719288	0
30.2	0.0282979	0.0387618	-0.023402	-0.0228859	0.0267484	0.0410141	0.0609191	0.0335386	0.000659833	-0.000201217	0
30.4	0.0307278	0.011424	0.050479	0.0155467	-0.0139494	0.052764	0.014559	0.0549125	0.0493177	-0.0111351	0
30.6	0.00223697	-0.0413394	-0.0545124	0.0426733	0.00265872	0.0288536	0.0576514	0.0166025	0.0385926	0.000884098	0
30.8	6.61002e-05	0.0405916	0.0170339	0.0152644	0.0126122	-0.0209963	-0.00031907	0.000315272	-0.014045	0.0250506	0
31	-0.0278336	0.0361612	0.00147428	-0.0238737	-0.00423589	0.00456304	-0.033714	-0.00960332	-0.0208853	0.00693252	0
31.2	-0.0464429	0.0186187	-0.0369345	-0.0291077	-0.0346568	0.000186534	-0.00968037	-0.0285321	0.0159629	-0.0185346	0
31.4	-0.0202844	-0.00802787	-0.00919029	-0.0124581	-0.0409446	-0.0413864	-0.00134016	-0.0243486	-0.00964534	-0.00876299	0
31.6	-0.000491998	-0.0481467	-0.00151118	-0.0137921	-0.014613	-0.0290505	-0.0168222	-0.013866	-0.0504349	0.016119	0
31.8	-0.0116586	0.0362358	0.00983461	-0.0212647	-0.00313386	-0.00514831	-0.0121257	-0.0371898	0.0138032	0.0162985	0
32	0.0163471	0.0215873	0.0229824	0.00520765	-0.0125074	-0.00536675	0.0073779	-0.0228722	-0.0144433	-0.00437963	0
32.2	0.029554	-0.0206913	-0.0220076	-0.0346954	0.0151873	-0.038046	-0.00434792	-0.0259125	-0.0235303	0.0161083	0
32.4	-0.0168093	-0.00473847	0.0246913	-0.0679121	0.0194213	-0.0371268	-0.0297535	-0.0116249	-0.0248636	-0.00988013	0
32.6	-0.0323141	0.00318482	0.0188073	-0.0386784	-0.00883355	-0.0084407	0.000104043	0.0154982	-0.0329507	-0.0310303	0
32.8	-0.00767158	-0.0252947	-0.0348859	-0.00378482	-0.0189634	0.00920924	0.0261059	0.0114873	-0.0280254	0.000916598	0
33	0.00531237	-0.0190141	-0.00371955	0.00991269	-0.00890353	0.0113022	-0.0152406	-0.00475761	-0.0197124	0.0218055	0
33.2	0.0363439	0.0169691	-0.0369866	0.0468177	-0.0095321	0.00929555	-0.00895567	0.0155752	-0.00981597	0.0155755	0
33.4	-0.0216009	0.00944912	0.0523419	0.0383036	0.00554363	0.0289779	0.0228378	0.0223531	0.0345088	-0.0143449	0
33.6	-0.00454726	0.0259713	0.055932	0.0111532	-0.008729	0.0131753	0.00614659	-0.0103539	0.0470079	-0.0237001	0
33.8	0.0283187	-0.0287766	0.0380419	0.0422237	-0.0154696	-0.0104	-0.0515087	-0.0105218	0.0555379	0.00224882	0
34	0.00108038	-0.0426505	-0.00316867	0.0106113	0.0032226	-0.00764399	-0.0194694	0.0105556	0.0409171	-0.00600737	0
34.2	-0.0114901	0.00722064	-0.0542026	-0.0394346	0.0215236	-0.00803176	0.0362815	-0.0178925	0.017531	-0.0105495	0
34.4	0.0173774	-0.0478206	-0.0123389	0.0630913	0.0181821	-0.0187516	-0.0161199	-0.0399051	0.0263442	0.0429981	0
34.6	-0.0111583	-0.0423816	-0.0267486	0.0574807	-0.0142809	0.00589754	0.0283747	0.0385245	-0.0250826	-0.0126352	0
34.8	0.00245556	0.0107285	-0.0181943	-0.0477243	-0.00840253	-0.0162092	0.0172851	0.00474581	-0.00546788	-0.0348691	0
35	0.0129237	0.019383	-0.0319199	0.00451822	0.00493389	-0.00611514	0.018175	-0.0334832	0.0191497	-0.00702893	0
35.2	-0.00385777	0.042805	-0.0231359	-0.0121658	0.00114669	0.00219436	0.00946769	0.0159019	-0.00786433	0.0108055	0
35.4	0.00508092	0.0652229	0.00489939	-0.0881532	0.00716487	-0.0194344	-0.030779	0.0422451	-0.0233128	0.00594865	0
35.6	0.0230432	0.0271138	0.00846161	-0.0322783	0.0156821	-0.0161917	-0.0238641	0.00171431	-0.0139005	0.0245764	0
35.8	-0.0103207	0.00546585	0.0103835	-0.0125975	-0.00324187	0.010967	0.013359	-0.000376719	-0.0317017	0.0485934	0
36	0.00531721	0.0113179	-0.0456321	0.000850667	0.0148258	0.0122343	-0.0461961	-0.02136	0.00437408	-0.0281474	0
36.2	0.0198598	-0.00897577	-0.0630432	-0.0352726	0.00934362	0.0145445	-0.011059	0.0266388	-0.0305106	0.00167452	0
36.4	-0.00943552	-0.0583831	-0.00812952	0.0119991	-0.00729649	0.0323336	0.022971	0.00410317	-0.0230058	0.0022858	0
36.6	-0.022796	-0.0448538	0.018188	0.0159957	-0.018043	0.0525806	0.000818762	-0.021628	-0.0181511	0.00195231	0
36.8	-9.9971e-05	0.0257209	0.0116988	-0.00522747	-0.0126669	0.0263071	0.0259824	-0.000363545	-0.0299255	0.0132596	0
37	0.00940902	0.0411726	0.0426149	0.064116	0.0138354	-0.0186907	0.0730578	0.00375599	0.0275876	-0.0351068	0
37.2	0.00571063	0.00588077	0.0389713	0.000284834	0.0160841	0.00581601	-0.00060427	0.0570256	0.0368054	-0.0050821	0
37.4	-0.00920178	0.00777508	0.00632428	0.0177211	-0.0261351	-0.0548279	-0.014451	9.25779e-05	0.00674315	-0.0177973	0
37.6	0.0194077	0.0564251	0.052099	0.0161689	-0.0116493	-0.0293045	-0.0108512	-0.0145255	0.0274126	-0.0307223	0
37.8	0.0036031	0.00762864	0.0391645	0.0176555	0.00537617	0.00325496	0.00356285	0.0357187	0.0115362	0.0140843	0
38	-0.0532025	-0.068943	0.0324386	0.0019433	-0.00291176	0.0200133	-0.00946024	0.0456983	-0.00887721	0.0340154	0
38.2	-0.0487693	-0.0517695	0.0561921	-0.0451345	0.0163671	0.0238568	-0.0294155	0.00758872	0.0188227	-0.00120866	0
38.4	0.0019613	-0.0211222	-0.0427698	-0.00979317	0.0437697	-0.0302786	0.00677855	-0.00630668	0.00840735	0.00584015	0
38.6	-0.00293954	-0.0111786	-0.0551917	0.0600496	0.0121934	0.0236387	-0.0133502	-0.0209647	-0.00888634	0.0272651	0
38.8	-0.0212013	-0.0139564	-0.0445206	-0.0059568	-0.00799703	-0.0146331	0.026289	-0.0535528	-0.00959701	0.00622355	0
39	0.00535165	0.00912584	-0.0412263	-0.0423912	-0.0196401	-0.0308867	0.00318712	-0.0285339	0.0035581	-0.0043279	0
39.2	0.0382143	0.0187499	-0.0232956	-0.031043	-0.00483474	0.00107139	-0.0234742	-0.00963635	-0.00172586	0.00990329	0
39.4	0.0470944	0.00837951	0.0112121	-0.0215942	0.00996426	0.028672	-0.00106631	0.0101791	-0.0352105	0.0208615	0
39.6	0.0502573	0.0019009	0.0181085	0.000654755	0.00425555	0.0349999	0.0145463	0.015744	-0.0390808	0.0143543	0
39.8	0.045147	0.000208598	-0.0246893	0.00864765	0.0232023	0.00227869	0.028702	-0.0671244	0.0103407	-0.0117824	0
40	0.0248241	0.0654386	-0.0324169	0.00615799	0.000175076	-0.00363559	-0.0122641	0.0460247	-0.00921447	-0.0371964	0
40.2	0.000923254	0.0332078	0.0100125	0.0117461	-0.0223346	0.00909799	-0.0225177	0.00220001	-0.0110672	0.00512764	0
40.4	-0.00548227	0.0202707	0.047309	0.00462482	-0.0456832	-0.0085075	-0.0134907	0.00220799	0.0088682	-0.0104907	0
40.6	-0.0250482	-0.0027778	0.036415	-0.0153364	-0.0112273	0.0075128	0.0408747	0.0107974	0.00469167	-0.0108977	0
40.8	-0.0351769	-0.0467941	0.0269955	-0.0151584	0.0310827	0.0389266	0.0508901	-0.0364288	-0.00460531	0.0237014	0
41	-0.00399878	-0.0117165	0.0175682	0.0113173	-0.000391704	0.000745777	-0.0367795	0.00660591	0.012439	-0.0191488	0
41.2	-0.0147636	-0.0202963	-0.0779371	0.0218959	0.0200029	-0.0118878	0.0104742	-0.00376258	0.0202887	-0.0186735	0
41.4	-0.0130875	-0.0384498	-0.012104	0.00949215	-0.00305258	-0.0113229	0.0211514	0.0320643	0.0337191	-0.0143383	0
41.6	0.0023794	-0.0078095	0.0837169	0.01733	0.0038162	0.0029129	-0.00574561	0.0023675	0.0601013	-0.0206578	0
41.8	0.0113593	0.024421	0.0383688	0.0194845	0.00130178	0.00641222	-0.00124628	-0.0255627	0.0252841	-0.00988228	0
42	0.0118249	0.00435651	-0.040934	0.0158558	-0.00586153	-0.0108571	0.00333408	-0.0113611	-0.00581962	0.00963893	0
42.2	0.00902185	-0.0196915	-0.0094741	-0.0171526	-0.00186008	0.000554242	-0.0013191	0.0128874	0.0165059	0.0133768	0
42.4	9.76014e-05	0.00998873	0.0409568	-0.0734799	-0.0301286	0.0259277	0.0367584	0.0500551	-0.0182945	0.0132695	0
42.6	-0.0132987	0.0196503	-0.000506989	0.0219094	-0.00137502	-0.0601127	0.0253538	0.0172796	-0.0637629	0.0166337	0
42.8	-0.0158165	0.00941822	-0.0426035	0.0398638	0.0051496	-0.0483465	-0.0544619	-0.0161269	-0.0195607	-0.00217225	0
43	-0.0201017	0.019696	-0.0363331	-0.000818907	-0.00670637	-0.000455335	0.00640622	-0.0013095	0.0140432	-0.00903386	0
43.2	0.00674866	0.0403182	-0.00145726	-0.0123619	-0.00197871	0.0173399	0.0512269	-0.00499531	-0.0377376	0.00144524	0
43.4	0.0200871	0.0287874	0.0337888	-0.0209972	0.00935776	0.00850133	-0.00212553	-0.0228911	-0.0550928	-0.00127914	0
43.6	-0.00691823	-0.00767097	0.0256863	-0.0221258	0.00316507	-0.0199922	-0.0239015	-0.0167104	0.00118422	0.00140973	0
43.8	0.0171978	-0.0271568	-0.0391656	0.0490555	-0.0030427	-0.0310079	-0.051176	-0.0324403	-0.0160268	0.0224785	0
44	-0.00578328	-0.0483743	-0.0334045	0.0491296	0.0154988	-0.0109305	-0.00922226	0.00981169	0.0261192	-0.0459477	0
44.2	-0.0216641	0.00545486	-0.0223716	-0.00232784	-0.00653113	-0.0042114	-0.0479411	0.0167898	0.0120478	0.0123302	0
44.4	-0.004101	0.00251021	-0.0127935	-0.0267652	-0.00599118	0.0237824	-0.0321639	-0.0476379	0.0180386	0.0117067	0
44.6	0.00316297	-0.0468276	-0.00291209	-0.000951863	-0.00551769	0.0141375	0.0134238	-0.062587	0.0235227	-0.0278	0
44.8	-0.0227724	-0.0384095	0.0147954	0.00866687	-0.0251294	-0.00607661	-0.00494575	0.00310818	0.00806511	0.0196119	0
45	-0.0311208	-0.0104797	0.0186771	-0.0287123	-0.0130901	0.0385996	-0.0240178	0.0228548	0.0260122	0.0228321	0
45.2	0.0179944	-0.0118645	-0.0503087	-0.0174248	-0.0169948	-0.0110944	-0.0544914	-0.00506388	-0.0215606	-0.0411923	0
45.4	0.0264589	0.00217821	0.0105617	0.01024	0.0124494	-0.0375508	-0.0296365	0.0253468	0.00140232	-0.0101119	0
45.6	-0.0150024	0.0209209	0.0257824	0.0369075	0.0288983	0.00759912	0.0324427	0.00400481	0.0401235	-0.000654974	0
45.8	-0.0165432	0.0170954	0.00527888	0.0205883	0.0132122	0.035217	0.0320155	0.00935138	0.00587633	-0.00673918	0
46	0.0178815	0.0119126	0.00673406	-0.0253898	0.0109774	0.0066588	-0.00118443	0.0178117	-0.0418358	0.0303023	0
46.2	0.0160535	0.0273816	0.0107397	-0.0459269	0.016152	-0.0100209	0.0277587	-0.0143679	0.00192	0.0320779	0
46.4	0.00194346	0.0372988	0.0294654	-0.0255071	-0.0102837	0.0159762	0.0567092	0.0224827	0.0601919	-0.0370258	0
46.6	0.0246956	0.0208851	0.0152106	0.0217839	0.00998566	0.00638825	-0.0142733	-0.00385153	-0.0275351	-0.00581412	0
46.8	-0.0143678	-0.0310345	0.0139506	0.00615248	0.0121378	-0.0298055	-0.0156089	-0.0148806	-0.000902211	-0.0132791	0
47	-0.0126215	0.0127902	0.0265073	0.00652964	-0.0221185	-0.0160568	-0.0197949	-0.00911086	0.00234031	-0.000670595	0
47.2	-0.0169291	-0.00481812	0.0118541	0.0131263	-0.0229989	0.0308936	-0.0184754	-0.00421282	0.00275791	0.0167133	0
47.4	-0.0353409	-0.0464157	-0.0178286	-0.0286586	0.0149633	0.0205074	0.0331287	0.00544265	0.0081831	0.0130621	0
47.6	0.00495199	0.00479341	-0.0241522	-0.0534538	0.0259282	-0.0219612	0.048641	0.0134146	-0.0421164	0.0291512	0
47.8	0.0043619	-0.0878744	-0.0272805	-3.51283e-05	0.00785318	0.0108686	-0.0190046	0.000528252	-0.00193468	0.0208337	0
48	-0.00411599	-0.0118175	-0.0300055	0.00469766	-0.0151612	-0.0116874	-0.0424164	-0.0241458	-0.0239303	-0.0138589	0
48.2	-0.0191702	-0.0114086	-0.0159139	-0.00214966	-0.0196818	-0.0176342	0.000994043	0.0218727	-0.0111122	-0.0321471	0
48.4	-0.0139927	0.0142007	-0.0106321	-0.0111022	-0.00243867	-0.01467	-0.0333903	-0.0134159	0.0148124	-0.0229996	0
48.6	0.00759946	0.0607509	-0.0190991	-0.0201093	-0.00089432	-0.0308217	-0.0273542	-0.0421727	0.00315373	-0.00898405	0
48.8	0.017591	0.0410635	-0.006001	0.0168152	-0.0217429	-0.0174498	0.0408055	0.0184511	-0.0103624	0.00138989	0
49	0.0290669	0.0454458	0.0111686	0.0727494	-0.023404	0.0151544	-0.0174616	0.00847809	-0.00164248	0.00952934	0
49.2	0.0577281	0.0259311	-0.0408542	0.0223083	-0.00339493	-0.0367477	-0.00906818	0.00876883	-0.00254684	-0.00757845	0
49.4	0.0304523	0.0439922	-0.0481845	-0.0134529	0.0312707	-0.00928231	0.0272936	0.0542098	0.0161638	-0.0219675	0
49.6	0.0108242	-0.00610025	0.0470552	0.00741747	0.0129893	0.0141113	0.0122594	0.027184	-0.0351821	0.0177551	0
49.8	-0.00511985	-0.0394847	0.11872	0.00402486	-0.0102426	-0.00168518	-0.00349652	-0.0335279	-0.0266639	0.0283918	0
50	-0.0071042	-0.0232729	0.067387	0.0135423	0.0122643	0.0277622	-0.00918655	-0.014871	0.0289529	0.00497747	0
50.2	-0.00406644	-0.0481935	-0.00300875	0.0519134	0.0300375	0.0773922	-0.0136778	0.0131134	0.0119645	0.00487096	0
50.4	-0.0458583	-0.0541309	0.0198242	0.00580653	0.00471394	0.0426305	0.0219565	-0.0406858	0.0164402	-0.0030234	0
50.6	-0.00158978	0.0374507	-0.00975092	0.00400981	-0.00621671	0.035428	-0.00299015	0.034446	0.0204742	0.0171739	0
50.8	-0.00291022	0.0103963	-0.0449018	0.00285368	-0.0283801	0.00320154	-0.0207183	0.0237141	-0.0191991	0.00500488	0
51	-0.000250567	0.00417606	-0.0494485	0.00297388	-0.0211304	-0.0238668	0.0160748	-0.0308747	-0.012755	0.0131361	0
51.2	0.00546264	0.0383303	-0.0438481	-0.00209623	0.0146566	-0.0421077	0.0483907	-0.021833	0.0101964	0.00337935	0
51.4	0.0197367	0.0231104	-0.0278766	-0.0281771	0.0269917	-0.0256131	0.0329111	-0.00634384	0.0330657	-0.023754	0
51.6	0.0608275	0.0138142	0.00984707	-0.0417398	0.0061662	0.0293168	0.00914045	-0.0241486	0.0695123	-0.00153435	0
51.8	0.0105383	0.0463195	0.028974	-0.00781568	-0.00605852	0.0186054	0.00775468	0.0140031	0.0134495	0.00390947	0
52	-0.0372102	0.0193272	0.0135804	0.0153999	-0.00047817	0.0425934	0.00945311	0.0106651	-0.00484646	0.0143255	0
52.2	-0.0191107	-0.0389854	0.0284423	-0.0231903	-0.00590925	-0.00427354	0.0337152	-0.00583076	0.00743878	0.0196773	0
52.4	-0.0258327	-0.0617658	0.031733	-0.0342507	0.0101052	-0.0204365	0.0308248	-0.0068328	-0.0187886	0.0137831	0
52.6	-0.0224668	-0.0392235	-0.0118017	0.00111418	0.0229209	-0.0253232	-0.0305354	0.00778169	-0.0190875	0.000240512	0
52.8	0.00659719	-0.00508248	-0.0301177	0.0310056	-0.0128176	-0.0380981	-0.0535081	0.0232849	0.0171107	-0.0148198	0
53	-0.0305251	0.0110277	0.0147289	0.0209605	-0.0426142	0.0263675	0.0229644	0.0471186	-0.0167937	-0.0135962	0
53.2	-0.0203019	-0.00313067	0.0176024	-0.0543337	-0.0122412	-0.0149552	0.0359392	0.0891033	-0.0443729	0.0115853	0
53.4	-0.0267251	-0.0294022	0.0216206	0.0247563	-0.01332	0.0312379	0.00567501	-0.0292914	-0.052422	-0.00219474	0
53.6	0.0132949	-0.0137523	0.0266331	-0.00186256	-0.000106995	0.0501171	-0.0168324	-0.00449633	0.00437118	-0.0249641	0
53.8	0.0217948	0.0100935	-0.0209515	-0.0347721	0.0152592	0.016666	-0.0377517	0.0675073	0.020081	-0.0166666	0
54	0.000193575	0.00831083	-0.0482566	0.0152877	0.0129746	0.00834759	0.00702401	0.0139144	-0.018341	-0.000361636	0
54.2	0.0342817	-0.00265352	0.0161608	0.0210948	0.0171889	0.0176749	0.0589248	-0.0235477	-0.0044953	0.00375524	0
54.4	0.0495361	-0.0160539	0.0444	0.0268102	0.0153853	0.011572	-0.0470441	0.0141547	0.0206257	0.0146363	0
54.6	0.0366595	-0.0065612	-0.0107052	-0.00303097	0.00757802	0.00882463	-0.0101502	-0.0165876	-0.00772936	-0.00182647	0
54.8	-0.0117273	0.0400048	-0.0232875	0.0363008	0.0162035	-0.0123323	0.0133454	-0.00550889	0.0137823	-0.00103163	0
55	-0.0100244	0.0222282	-0.0069978	0.0100089	1.18461e-05	-0.0181948	0.0148779	-0.0305915	0.0275623	0.00911316	0
55.2	0.00737013	0.00361774	-0.00873109	-0.0434358	-0.0324762	-0.0403752	0.0196739	-0.0478688	0.0204056	0.0057938	0
55.4	0.0100905	0.0451423	0.0107059	-0.0109406	-0.0455689	-0.0327503	0.0105975	-0.0264242	0.0192191	-0.0268959	0
55.6	0.0294812	0.0516432	0.0382089	0.0229349	-0.0262101	0.0383613	0.00578488	-0.0440365	0.00604274	-0.0571451	0
55.8	-0.00544525	0.0210757	-0.0309081	-0.00058814	0.0225712	-0.0105874	0.0040339	-0.019398	0.00448255	-0.00938245	0
56	-0.0246156	0.0220919	-0.032363	0.0219142	0.00207767	-0.027199	-0.0131435	-0.0172843	0.00255274	0.0243054	0
56.2	-0.0235712	-0.00327364	0.00440281	0.0317675	0.0109571	-0.00422294	-0.0270461	0.00563334	0.00853494	0.0323605	0
56.4	-0.0329547	-0.0167377	0.0189226	-0.0121382	0.040038	-0.0288543	-0.0391753	0.010478	-0.0330144	0.0161913	0
56.6	-0.0293054	-0.0417785	-0.00219069	-0.0433476	0.0290763	-0.0471768	-0.0329059	-0.0111368	-0.0514478	0.00409893	0
56.8	-0.0278675	-0.0724568	-0.0287241	-0.032003	-0.00321676	-0.0277857	-0.0157462	-0.0150003	-0.00598381	0.0237823	0
57	-0.0559657	-0.0195264	-0.0220346	-0.0229662	-0.0131827	-0.0523564	-0.0260559	-0.00473765	-0.00657253	0.0362388	0
57.2	0.006444	-0.0118124	-0.0211475	0.0058085	-0.00893312	-0.0265244	-0.0183913	0.0149567	0.00466305	0.00497154	0
57.4	0.00743405	0.0112831	-0.0742324	-0.0281688	-0.000776124	-0.00246149	-0.00560887	0.0181539	-0.000820431	0.00959856	0
57.6	-0.00118613	0.0472228	-0.0526305	-0.0204565	0.0176553	-0.0320068	0.00373886	0.0243374	-0.00931032	0.000279187	0
57.8	-0.0175831	0.00281255	-0.00909522	0.0647609	0.0373241	-0.0601754	-0.0263322	-0.026479	-0.00225934	-0.0121668	0
58	-0.0227779	-0.00719348	0.0248894	0.0834954	0.0207447	-0.0279844	-0.0363045	-0.0588305	-0.00708637	0.00370327	0
58.2	0.0125141	0.0723806	0.0567675	0.0213475	-0.0093989	0.00662143	-0.00609842	-0.00375302	-0.0229888	0.0351537	0
58.4	-0.00284124	0.011703	-0.00579318	0.0437151	0.0168934	-0.0298952	-0.0515688	-0.0311008	0.00686953	0.0657964	0
58.6	-0.000443174	0.0269445	0.040254	-0.00808351	0.0058998	-0.0335558	-0.0252099	-0.0440415	0.0370676	0.0262515	0
58.8	-0.0100467	-0.00509622	0.00558861	0.0305461	-0.0129145	-0.0456202	-0.0451193	-0.00788262	0.0330642	0.0100955	0
59	-0.0329113	0.00230228	-0.00135416	0.0328854	0.0174998	-0.0374388	-0.0669042	0.0111439	-0.00433385	0.0213575	0
59.2	-0.0292203	0.0235923	0.045919	-0.00524232	0.039577	-0.0295465	-0.0419204	-0.0171708	0.00899448	0.0438853	0
59.4	-0.0312041	-0.00246916	0.0407008	0.0158147	0.0182212	-0.026108	-0.0113977	-0.0701194	0.0506515	0.0536174	0
59.6	-0.0623121	-0.00311786	0.0160058	0.0253225	0.0100468	-0.00375034	-0.00223771	-0.0698234	0.0284362	0.0337055	0
59.8	-0.016496	-0.0219302	0.0143348	0.0131434	0.0147544	-0.0398594	-0.0289084	0.0425777	0.0251084	0.0548398	0
60	0.0214616	0.0124134	-0.00849152	0.0663129	0.0592017	0.00909607	-0.0756342	0.0170197	-0.0315489	0.0861801	1
60.2	0.11151	0.0265251	0.0408813	0.0480705	0.11925	0.0754375	0.0575011	0.0684177	0.0402919	0.117207	1
60.4	0.179696	0.0522531	0.120222	0.107593	0.143955	0.0722386	0.135111	0.151635	0.113876	0.147308	1
60.6	0.177227	0.104976	0.161348	0.170971	0.124585	0.0413807	0.112742	0.147441	0.0645333	0.152971	1
60.8	0.139924	0.131877	0.140293	0.0885838	0.0947367	0.0395578	0.124971	0.118158	0.0416878	0.133536	1
61	0.0900183	0.119666	0.0731366	0.083547	0.0824385	0.0301835	0.0546552	0.0976846	0.114873	0.120684	1
61.2	0.111489	0.0564804	0.101664	0.121841	0.0811643	-0.00203732	0.0374468	0.0474979	0.0826287	0.0956432	1
61.4	0.0812308	0.039323	0.0826339	0.0869611	0.0320404	0.00796761	0.0568776	0.000137495	0.0367044	0.0734852	1
61.6	0.0437386	0.0816241	0.0298873	0.0773619	0.033664	-0.0209296	0.0474568	0.0170814	0.0686951	0.0659142	1
61.8	0.0394365	0.0953151	0.0250141	0.0748406	0.0489022	-0.0394203	0.00638959	0.00694775	0.0611438	0.0355205	1
62	0.0245003	0.0519944	0.0366698	0.0655045	0.0232996	-0.0206614	-0.0243968	-0.0427089	0.00453688	0.028159	1
62.2	-0.00809673	0.0223051	0.0196746	0.0899149	0.00551738	-0.0474775	-0.0277633	-0.0335649	0.00800925	0.0755373	1
62.4	-0.0131331	0.0361048	0.0228327	0.0713789	-0.0198196	-0.0802306	-0.024363	-0.00774761	-0.00676925	0.0534481	1
62.6	-0.0220797	0.0420948	-0.00235471	0.0738792	-0.0529446	-0.0688607	-0.0246955	0.0159409	-0.0334806	0.0279521	1
62.8	0.0217582	0.0297914	0.0116522	-0.0350213	0.00913485	-0.0488181	-0.063735	-0.0350459	-0.0288234	-0.00517812	1
63	0.0118031	0.0496888	-0.0225742	-0.0113584	0.017763	-0.0491805	-0.0331183	-0.0297858	-0.0303725	0.000384979	0
63.2	-0.0237196	0.0343497	-0.0660756	0.059819	-0.0300454	-0.0624842	-0.0112183	-0.0360643	-0.0386848	0.0312132	0
63.4	-0.0162479	-0.034154	-0.0301408	-0.00579567	-0.0543743	-0.0401251	-0.0245888	-0.0477671	-0.0371848	0.00819967	0
63.6	-0.0194405	-0.0546516	0.00682652	-0.0454795	-0.0748727	0.00641966	0.0434005	0.0600844	-0.0419559	-0.042435	0
63.8	0.0135255	-0.0757873	-0.000295468	-0.0742466	-0.0172585	-0.0324514	0.00503228	-0.0197959	-0.0316801	-0.00607325	0
64	0.00264658	-0.0483298	-0.0275593	-0.00114896	-0.0852138	-0.0136456	-0.0145146	-0.0464507	-0.0482283	0.000287533	0
64.2	-0.000785238	0.0153922	-0.00752572	0.0398504	-0.0818595	-0.015741	0.0326873	-0.019786	-0.0381086	-0.0273469	0
64.4	0.0115523	0.0272814	0.0281025	0.00334064	-0.0351529	-0.0222364	0.00768619	-0.0105449	-0.0342309	-0.0622041	0
64.6	0.0148837	0.000515616	0.01706	-0.00762575	-0.0372873	0.00494647	-0.0343462	-0.0429957	-0.0532038	-0.0406238	0
64.8	0.0110463	0.0094178	-0.035449	0.0125597	-0.0301262	-3.97259e-05	-0.0162496	-0.0513726	-0.0394344	0.0133501	0
65	-0.00254178	0.0375693	-0.0560841	-0.0115645	-0.00680476	-0.0357368	-0.0684935	0.00980832	2.53685e-05	-0.0172748	0
65.2	-0.019245	0.0587445	0.0134158	0.0447096	0.0020938	0.00965466	-0.033439	-0.0619816	-0.00396472	0.000891154	0
65.4	-0.012911	0.0108173	0.008253	0.0187982	-0.044374	-0.00622591	-0.0614545	-0.0323548	-0.0385597	0.0238171	0
65.6	-0.0073792	-0.0339261	0.0315146	-0.0380729	-0.0465664	-0.00891428	-0.100062	-0.033902	-0.0350464	-0.00166798	0
65.8	-0.0215735	-0.0219164	-0.00983135	-0.033634	-0.0212032	-0.0104124	-0.044539	-0.00548668	-0.0263073	-0.0361096	0
66	-0.0320975	-0.016106	-0.0733577	-0.0417971	-0.00831915	-0.0211877	-0.00462551	0.0155672	-0.0164133	-0.0137266	0
66.2	-0.0221385	-0.0412173	0.027079	-0.097671	0.0023316	0.014095	-0.0615172	-0.0918374	0.00475515	0.0232209	0
66.4	-0.0161085	-0.00927945	0.0279018	-0.0417386	-0.0415653	-0.00607994	-0.0335196	-0.0103093	-0.0424434	-0.0226652	0
66.6	-0.00697	-0.00174018	-0.064866	0.0609641	-0.0298772	-0.0340633	-0.00470929	-0.0155948	0.0128194	-0.0264248	0
66.8	0.000748113	0.0115946	-0.0441634	0.0450369	-0.0113469	-0.0303264	0.014219	-0.0218542	-0.0154291	-0.0307094	0
67	0.036534	-0.00907535	-0.00295883	-0.00481727	-0.00824886	-0.0155766	0.026654	-0.0333705	-0.0175981	-0.0250057	0
67.2	0.0296297	-0.00412204	0.0500132	0.00388713	0.000561941	-0.0222662	0.0207489	-0.0330178	0.0203734	-0.026197	0
67.4	-0.0164404	0.0177713	0.0776253	0.0331594	0.0014128	-0.000642166	0.0133208	0.00889525	-0.00850926	-0.0526434	0
67.6	0.0223314	-0.0306192	-0.046391	0.0320813	-0.0145455	0.0612249	0.0216532	0.0107108	-0.019099	-0.0542547	0
67.8	0.0433762	0.0458868	-0.029892	-0.0107805	0.00470071	-0.00113188	0.0135811	0.00128596	0.000251132	-0.0499903	0
68	0.0351751	-0.000495718	-0.0307893	-0.0099519	0.00288757	-0.0147807	0.0335041	-0.00467357	2.33285e-06	-0.0239823	0
68.2	-0.0065768	-0.0196072	-0.0101362	0.00886606	-0.00428456	0.00864916	-0.0118674	0.00102069	0.000194996	-0.0051049	0
68.4	-0.0262054	0.0381011	0.00153733	-0.00875707	-0.0126285	-0.00448134	-0.0257839	0.00202771	-0.0122279	0.0239752	0
68.6	-0.0121072	0.0393671	-0.00136548	-0.0316821	-0.00981062	0.00610747	0.00260675	0.000438383	-0.0139531	0.0253593	0
68.8	-0.00529943	-0.0238355	0.0413671	-0.0141368	0.0191744	0.0493444	0.00388009	0.006426	0.0233694	-0.0108743	0
69	0.00377303	-0.0297571	0.0441666	0.0108337	0.0272723	0.000822947	0.0604078	0.0158691	0.0313914	0.0247877	0
69.2	0.00291255	0.0108493	-0.0334925	0.0213453	-0.00854191	-0.00872698	0.0119158	0.0612949	0.00545983	0.0451756	0
69.4	-0.0203569	0.0108702	-0.0106982	-0.0295813	-0.0160292	0.00166448	-0.0391246	0.0466308	-0.0181182	0.036537	0
69.6	-0.0114096	-0.000257827	-0.0335763	-0.00164531	0.00291058	-0.0207086	-0.0268979	0.0210782	-0.017038	0.0210575	0
69.8	0.00804793	0.0011905	-0.0449226	0.0101062	0.00104262	-0.0118259	-0.00552649	-0.00873209	-0.0219791	0.00368896	0
70	0.0197645	-0.0193731	0.0124527	-0.0354881	-0.0007676	0.0230317	-0.0212891	-0.0525318	-0.0179242	-0.00288352	0
70.2	0.027601	-0.0642624	0.00925983	-0.00194488	0.0263788	-0.00490716	-0.032719	-0.0225194	0.0200192	0.0146192	0
70.4	-0.032023	-0.0734835	0.0424394	-0.0240626	0.016872	-0.0248943	0.0086176	0.0672595	0.00685388	0.0213219	0
70.6	-0.0136148	-0.0305973	-0.00777873	-0.0188832	0.00634539	-0.0189631	0.0377998	-0.0052243	-0.011055	0.00185894	0
70.8	-0.00383518	0.0245072	0.00720866	0.00373329	-0.0290771	0.0374173	0.0243516	-0.00863191	-0.0228168	0.0163796	0
71	-0.0205531	0.0538152	0.00692497	0.0548547	-0.0124963	0.0353816	-0.0123928	-0.00214244	0.0521879	0.0208908	0
71.2	-1.43567e-05	0.0365587	0.00374148	0.0410784	0.0275122	-0.018575	-0.0243651	-0.0140584	0.0797546	-0.0106978	0
71.4	0.0383048	0.00783639	0.0361296	-0.0154696	0.0169038	-0.00700767	0.0282194	0.0187428	-0.00608806	-0.0312789	0
71.6	0.0207328	0.0248476	-0.0163372	0.0484029	0.0098886	0.0338727	0.0801151	-0.00761296	0.00502744	-0.0271178	0
71.8	-0.0165082	0.0404265	0.0210613	0.035703	-0.00396336	0.000886672	-0.0104335	-0.0260031	0.00273877	-0.0178495	0
72	-0.0168156	0.0223075	0.0317307	0.0697596	0.0068014	0.0231669	-0.0410139	-0.00979216	-0.00281882	0.00821677	0
72.2	0.00311877	-0.00901555	0.00641464	-0.00645863	0.0132736	0.0195512	0.00828985	-0.0176507	-0.00118517	-0.0122458	0
72.4	0.0109154	0.0203165	-0.0130218	-0.0533837	0.0241173	0.00259563	-0.00166735	-0.0242692	-0.0115453	-0.0175406	0
72.6	-0.00201589	0.0226682	-0.0229862	-0.0150233	0.0226849	0.000734332	-0.00719251	0.0149311	-0.0132685	0.0028818	0
72.8	-0.0170263	-0.0385173	-0.0328522	-0.0384416	-0.0017471	-0.00722519	0.0622912	0.0361354	0.0131984	0.00420057	0
73	-0.00781586	0.0288167	-0.0232893	0.00275847	0.0164371	0.0211906	0.00875391	-8.64165e-05	0.019757	0.0499544	0
73.2	0.0102207	0.000273782	0.0332407	0.0170069	0.00273523	-0.0185411	-0.0289096	0.067165	0.00696315	0.0244583	0
73.4	0.0111632	-0.0319511	0.000450744	-0.0644885	-0.0171645	-0.00670364	0.0145959	0.0648096	-0.0180787	-0.008149	0
73.6	-0.0177592	-0.0216934	-0.00406805	-0.0541351	-0.0102435	-0.0157659	-0.000199587	-0.0070107	-0.0136666	-0.00245889	0
73.8	-0.0209215	0.0214699	-0.00410795	0.0261734	-0.0211667	-0.0409907	-0.0390487	-0.0258987	-0.0073555	0.0161678	0
74	0.000332773	0.0255768	-0.0322904	0.0171733	-0.0366201	-0.027328	-0.00235639	0.00695693	-0.000868054	0.0132069	0
74.2	-0.0213906	-0.0436019	0.00363903	-0.00620043	0.0119389	-0.0107498	0.0151078	-0.00881372	0.0309376	-0.0058588	0
74.4	-0.0312943	-0.0246858	-0.0247999	0.0481187	0.0438811	0.037547	-0.0397754	-0.0588002	-0.00815356	-0.00901191	0
74.6	-0.0128473	-0.0198095	0.0146256	-0.0538886	0.0158723	0.0105565	-0.00541775	-0.0129153	-0.0255133	-0.0177319	0
74.8	-0.000825944	0.0170454	0.00772214	0.0155859	-0.0217609	0.00251444	0.00984706	-0.0153408	-0.000859678	0.00174991	0
75	0.0128013	-0.0145446	0.00561766	0.0441189	-0.0137562	-0.0279683	-0.0240469	-0.0422603	0.0103555	0.0276852	0
75.2	0.0193386	-0.0375863	0.0113355	-0.0645132	0.00397485	-0.0324431	-0.0226982	-0.0405111	-0.00678926	0.025687	0
75.4	0.000792862	0.0206403	-0.0321842	-0.0454109	-0.00571422	0.0361569	0.00626174	-0.0188965	-0.0204294	0.00399289	0
75.6	-0.013208	-0.0306186	-0.0340165	0.0183074	0.00196238	0.0121491	-0.017661	0.0308268	-0.0251868	-0.00458255	0
75.8	-0.0158371	-0.0245727	-0.0343384	-0.0352309	0.0177009	-0.0254503	-0.0428395	-0.0136724	-0.0309086	0.0259865	0
76	0.000108657	-0.0308517	0.00712903	-0.0525197	0.01933	0.0092205	-0.0353861	-0.0242683	-0.00621394	0.00971192	0
76.2	0.0169118	-0.0392884	0.0476744	0.0103894	-0.0247748	0.0374254	0.0373312	0.00752001	0.0050276	0.0225221	0
76.4	0.0121776	-0.0165788	0.00693354	0.0631661	-0.0184535	-0.00736685	0.047471	0.00886024	0.00939485	0.0157675	0
76.6	0.00663566	-0.00797529	-0.0177645	0.0442947	0.0146358	-0.0395562	0.00298772	0.0183835	0.0131668	-0.033198	0
76.8	0.00220664	-0.0204052	0.0340115	0.00737396	-0.0145407	0.00682488	0.0323833	0.0502404	0.00659345	-0.0365774	0
77	-0.0402019	0.031122	-0.0309769	0.0295378	0.0152788	0.021885	0.0140517	0.00221115	0.0269248	-0.0312613	0
77.2	-0.00698746	0.0612438	-0.0376941	0.0231646	0.00185127	0.0121788	-0.0489296	0.0637103	0.000475989	-0.00186903	0
77.4	0.0455347	0.0212807	0.036228	-0.0751602	-0.00650713	-0.00751582	-0.00605497	0.00599631	-0.010993	0.00170739	0
77.6	0.03142	0.0138375	0.0464015	-0.0147939	-0.0018774	-0.0079823	-0.0129128	-0.0257361	0.0342339	-0.0228582	0
77.8	-0.01129	0.0198032	0.0036101	0.0537109	0.00348515	-0.00603825	-0.0443737	0.0180436	0.00451654	-0.00914393	0
78	-0.0178724	0.00314496	0.0149945	-0.0241167	-0.00467977	-0.0126067	0.00511566	-0.00518256	-0.0606458	0.0211783	0
78.2	0.00465953	0.0351712	0.0479609	0.0105421	-0.0415944	-0.00186488	0.016844	-0.0453593	0.0268064	-0.00513764	0
78.4	0.0410523	0.0391547	0.0321236	0.0266725	-0.0443173	-0.0026625	0.0218868	-0.0302878	0.0410891	0.00312637	0
78.6	0.00680076	0.0114416	0.031943	-0.01568	0.00700028	0.00571584	0.046256	-0.0050106	-0.0216082	0.0120918	0
78.8	-0.0357156	0.00930615	-0.0249459	-0.0244285	0.0236183	0.0270827	0.0695211	0.0321383	0.0325047	-0.00277078	0
79	-0.00482789	0.0126046	-0.0344281	0.0540528	0.00745648	0.00692981	0.0324296	0.018996	0.0228711	-0.010952	0
79.2	0.0177636	-0.006301	0.0214327	0.049855	0.0032574	-0.00525806	-0.0301151	-0.0169886	-0.0337962	-0.0206843	0
79.4	-0.0135597	0.00193974	0.0235578	-0.0418729	-0.000183493	0.00939166	-0.0471349	-0.000705694	0.0253212	-0.0348803	0
79.6	0.0128589	0.057989	0.00293925	0.0360322	-0.0107109	-0.0488769	-0.0434837	0.0134408	-0.00782155	-0.00469943	0
79.8	-0.00839453	0.0366944	-0.0216384	-0.00443065	0.0111088	-0.0116325	-0.0118822	0.0258772	-0.0398602	0.0094522	0
80	-0.00322668	-0.0524435	-0.0320997	-0.0233042	-0.00461169	0.0290686	0.0283227	0.0175669	0.014476	0.0288813	0
80.2	0.0102958	-0.0520734	-0.0549173	0.00300896	-0.0121328	0.0257585	0.0272648	-0.00364768	0.0308393	0.0106051	0
80.4	-0.00410795	0.00967787	-0.042167	0.00730197	-0.00367006	0.000615484	0.0123724	0.00246106	0.00123273	-0.0172414	0
80.6	-0.0128813	0.0191794	0.01431	-0.00973916	-0.00230303	-0.00959678	-0.00632418	-0.00716658	-0.0042308	0.000626503	0
80.8	0.0117166	-0.0031363	0.0241367	-0.0100283	0.00720816	0.0104603	-0.0398166	-0.0489974	-0.00846916	0.0356618	0
81	0.0203999	-0.0196584	-0.0138836	0.013204	0.0122763	0.0215534	-0.011528	0.00557526	-0.0180951	0.0463288	0
81.2	-0.0187115	-0.0693625	-0.0170484	0.0281615	0.0193155	0.00512792	0.0127974	0.00436062	0.00435886	0.0295528	0
81.4	-0.007551	-0.0325532	0.0292725	-0.0393063	0.0030619	-0.00596439	0.0209135	-0.00159006	-0.0198302	-0.0367004	0
81.6	0.00631637	0.0171803	0.0240128	-0.0378977	-0.0105662	0.0129609	0.0155057	-0.0196077	-0.00889998	-0.0242081	0
81.8	0.00347348	0.0283776	0.013603	0.0348954	-0.00097281	0.0195132	0.0474655	-0.00531362	0.0264332	0.024101	0
82	0.0103939	0.0140177	0.0494911	0.0145051	-0.00468407	-0.0101597	0.0366311	0.0255863	0.00690906	0.00302765	0
82.2	0.00366561	-0.0262459	0.0315101	-0.0470836	-0.02807	-0.029559	-0.0715723	-0.0265558	0.000917336	-0.0143178	0
82.4	0.0315337	0.0339563	0.00780317	0.019556	0.000152169	-0.0258673	0.0495485	0.0149192	0.0271887	-0.0457744	0
82.6	0.0230853	0.0389737	-0.042477	0.0164738	-0.0104585	0.0252191	0.0175832	0.0439689	0.0128439	-0.036756	0
82.8	-0.00155031	0.0318762	0.00395062	-0.0214563	0.00506281	-0.00157869	-0.0103602	0.019611	0.0105872	-0.011645	0
83	-0.00114292	-0.00346908	0.0097963	-0.0192544	0.0238653	-0.0263365	0.00322388	0.00722801	0.00154232	-0.000819644	0
83.2	0.0185982	-0.0199885	-0.0542047	-0.0131155	-0.00122081	-0.00792159	-0.01663	0.0321681	-2.28643e-05	0.0175424	0
83.4	0.00648533	-0.000146608	-0.0307256	-0.0223618	-0.00581642	-0.00546998	0.0105314	0.025082	0.0271592	0.042214	0
83.6	-0.0418391	-0.0718854	0.000141384	0.010069	0.0360446	0.0418318	0.0574422	-0.033783	0.00284954	0.025623	0
83.8	-0.000358633	0.0363695	-0.000520124	0.0465184	0.0147699	0.0174076	-0.0238942	-0.00358973	0.0332946	0.011172	0
84	-0.0177823	0.0475528	-0.0183441	0.0150994	0.0213313	-0.00452818	-0.0386585	0.000899472	0.00708419	-0.00750358	0
84.2	-0.0565841	0.0282109	0.0170818	-0.0285936	0.0192987	-0.0166621	-0.00117318	-0.0450553	-0.0175155	-0.00381306	0
84.4	-0.020176	0.0210751	0.0377202	-0.00982769	0.0180731	0.0138147	0.00672489	-0.0154024	-0.000213388	0.00498419	0
84.6	0.0299668	-0.0122539	0.00021968	0.028599	0.0154173	0.0419762	0.00311179	0.0554581	0.00249464	0.00513744	0
84.8	0.0108108	-0.0113857	0.00406065	0.0154929	-0.0267597	-0.00492081	0.0056833	0.0128102	-0.0148101	0.0120279	0
85	-0.00250245	-0.0171789	0.0422051	0.00113155	-0.00361446	0.0049842	-0.0199644	-0.0368137	-0.0135394	-0.00318662	0
85.2	-0.0207338	0.0325111	0.0363779	-0.0114119	-0.0260926	-0.0496682	-0.0454	-0.0239421	-0.0242623	0.0259175	0
85.4	-0.0101657	-0.0337585	-0.00563076	-0.0166881	-0.0188596	-0.0282144	-0.0166024	-0.00456147	-0.0335295	0.0348013	0
85.6	0.00363984	-0.0316857	-0.0395976	-0.020485	-0.0173035	0.00227621	0.0035885	-0.0229439	-0.0231042	0.0121908	0
85.8	-0.0154856	-0.00265606	-0.0354904	-0.0388121	-0.00905295	-0.0121311	-0.0340603	-0.0332261	-0.021884	-0.00812821	0
86	-0.0097219	-0.0437057	-0.0165186	-0.0190077	0.0230926	-0.00409761	-0.0555089	-0.0117672	-0.0319237	-0.00858365	0
86.2	0.0471408	0.0373246	-0.0373889	0.0586498	-0.0080188	0.00236056	-0.0137789	0.00756198	-0.00798045	0.00577188	0
86.4	-0.00212578	-0.0558084	-0.0590567	0.00265806	0.00288085	7.72694e-05	-0.0206168	0.0613857	0.00911737	-0.00518529	0
86.6	-0.0198479	-0.0231111	0.0336949	-0.0287989	-0.0255672	-0.0127914	-0.00288403	0.0171141	0.00897173	-0.00484665	0
86.8	-0.0425966	-0.0210274	0.00994397	0.0103742	-0.000896379	-0.0234416	-0.00877305	0.00460807	-0.0295757	-0.00950576	0
87	-0.0217245	-0.0363444	-0.0329272	0.0326308	0.0268576	-0.0051257	0.0182248	0.0148601	-0.0210694	-0.018	0
87.2	0.0432354	0.0382805	0.0106933	0.0116443	0.00496637	-0.00591572	0.0237296	-0.00920797	0.02805	-0.000337998	0
87.4	0.0433763	0.0567111	0.00096068	-0.00250545	0.00586106	-0.0223838	-0.036262	-0.0243098	0.0110509	0.00901305	0
87.6	0.0248207	-0.0294927	0.00212081	0.00327341	-0.000855062	0.0596941	0.0612954	-0.0347897	-0.0152072	-0.0408918	0
87.8	0.00947502	0.000622041	0.0511276	0.0247779	-0.0325239	0.0544914	0.0666287	0.0239258	0.0145853	-0.0185723	0
88	-0.0171121	0.00447491	0.0120149	-0.00512301	0.00306122	0.020844	0.0311199	-0.0363401	0.0401108	-0.0063436	0
88.2	-0.0144395	-0.00539509	0.0332282	-0.0102902	0.0122911	0.0250722	0.00668126	-0.0111689	0.00665452	-0.0308411	0
88.4	-0.00172252	-0.0115213	0.0793351	0.00765435	0.0117034	0.0200638	0.011767	0.0259143	-0.0133468	-0.0339105	0
88.6	-0.00421089	-0.0251014	0.0167578	0.0023261	0.0283574	-0.0132087	0.00376713	-0.0194792	0.0179264	-0.00348101	0
88.8	-0.00465863	0.000590141	-0.0296442	0.00277128	-0.0155483	-0.0271348	-0.0550396	0.0400611	0.0316572	0.0164399	0
89	-0.0351364	0.00752289	0.00356693	-0.0201784	-0.00778728	-0.0430616	-0.0288116	0.00927267	0.033133	0.0184141	0
89.2	-0.000856223	-0.00607721	-0.020078	-0.0293455	-0.00461462	-0.0380833	0.00936915	0.0515149	-0.020523	0.00244861	0
89.4	-0.0112665	0.0223504	-0.0377579	-0.0223467	-0.0129906	-0.00129016	0.0231672	0.0157955	-0.0269281	0.0236579	0
89.6	-0.0244967	0.0662686	-0.0233276	-0.0282398	0.0014731	0.00613851	0.0174417	-0.0420432	-0.0155755	0.0359566	0
89.8	0.00896207	0.0436498	-0.045361	0.0217264	0.00165749	-0.0240261	0.00823062	-0.0262039	-0.0171446	0.00252835	0
90	0.0198656	-0.0221892	-0.0827212	0.0689177	-0.0353318	-0.0227455	0.0203918	-0.0119465	0.000954388	-0.0187225	0
90.2	-0.000218141	-0.0189848	-0.0371437	-0.0335545	-0.0254469	0.00658713	0.0241594	-0.023881	0.0176513	-0.00123864	0
90.4	-0.00164544	0.0197635	0.000283349	0.0341109	0.0273646	-0.0230283	-0.0634602	-0.0163986	0.0440303	-0.0126794	0
90.6	-0.00675552	0.0110405	-0.0179207	-0.0156733	0.0234236	-0.013482	-0.0223784	-0.0190697	0.00438407	-0.0157867	0
90.8	0.0131035	-0.0636537	0.00939307	-0.00401275	-0.0133491	0.0253615	-0.016262	-0.00280146	-0.000240831	-0.0143861	0
91	0.0228288	-0.0666861	0.0564216	0.0203669	-0.00125354	0.0365261	0.00445918	-0.00178643	-0.0180513	0.0295896	0
91.2	-0.00689588	0.0124728	0.0603983	-0.0222358	0.0297544	0.00456709	0.0550446	0.00701167	-0.0388576	0.0255287	0
91.4	-0.0232381	0.032014	0.0375721	0.00861795	0.00226842	-0.0263544	-0.0165773	0.0437616	0.021352	-0.067494	0
91.6	-0.00965913	0.0165639	-0.0141533	-0.0177966	-0.0280227	0.00554366	-0.0145779	-0.0161808	-0.0129345	0.00612443	0
91.8	-0.00423964	-0.0220935	-0.00747876	-0.044679	-0.0150881	0.032902	0.0234038	0.0141357	-0.0490508	0.0373379	0
92	0.0348265	-0.0422595	-0.0307893	-0.0607077	-0.0030683	0.0262996	-0.05235	-0.00719613	-0.0315562	0.0228565	0
92.2	0.00724907	-0.0127753	-0.0158312	-0.0204844	0.00310883	0.0195408	-0.0278784	0.00809398	-0.0146638	0.0351318	0
92.4	-0.0102948	-0.00101812	0.00261201	0.014725	-0.0013708	0.0193008	0.0320825	0.029698	0.0102873	0.0166265	0
92.6	0.0167702	-0.0171033	-0.00822243	-0.0175276	-0.00912944	0.00797012	-0.0194185	-0.0207828	0.0249332	-0.0405445	0
92.8	-0.0501754	0.0112577	0.0164996	-0.0351582	0.0130368	-0.00921406	-0.0024517	-0.0109351	-0.0223767	-0.0286901	0
93	-0.0164458	-0.0062223	-0.0766594	-0.0119359	0.0290321	-0.0173696	0.00767896	0.00309033	0.0161204	-0.0113677	0
93.2	-0.00611997	-0.0183208	-0.0145933	0.0229931	0.0214692	0.0264315	0.0243413	0.0151732	0.0456077	-0.00216396	0
93.4	-0.019604	-0.00252723	0.0471635	0.0367588	0.013936	0.00763156	-0.00164515	0.0250285	0.0284079	0.00864674	0
93.6	-0.0195435	0.0318091	0.033542	0.0422451	0.0138394	-0.0439615	-0.0329975	0.00565595	-1.68747e-05	-0.00283919	0
93.8	-0.00752187	0.0201262	0.0198516	0.0607454	0.00853416	-0.0366768	-0.0184069	-0.0247403	0.00862905	-0.0286065	0
94	0.0109785	-0.0162108	0.00623403	0.0549657	-0.0100938	-0.0124273	0.00439907	-0.0137294	0.0196098	-0.0145685	0
94.2	0.0260348	0.0346178	-0.0175298	-0.0176795	-0.0190891	-0.0300145	0.00449881	0.0274626	-0.0256405	0.034708	0
94.4	0.0162731	0.0104463	0.0048335	-0.0637729	0.020849	0.00155382	0.0306523	0.0339839	0.0141085	0.0305096	0
94.6	0.0214751	0.01188	0.012238	-0.041734	-0.0100671	0.0141213	0.0356397	-0.0250041	0.0057414	-0.00127846	0
94.8	0.0279522	0.0226109	0.0364099	0.000158207	-0.0308197	0.0167067	0.0175314	-0.0437087	-0.0181623	0.00311618	0
95	0.0192711	0.0211452	0.0324406	0.0417586	-0.0133249	0.0169477	0.00636844	-0.0146623	-0.00606341	0.00591098	0
95.2	0.00258671	0.0240599	-0.00512077	0.0469946	0.00974569	0.00816332	-0.00571538	-0.0166435	-0.0131709	-0.0213414	0
95.4	-0.00912459	0.00346656	-0.00272591	0.0112648	0.028417	-0.0029837	-0.0267306	-0.0168595	-0.0553889	-0.0260603	0
95.6	-0.00171643	-0.0340791	-0.0196208	0.0382554	-0.0165588	-0.0338699	-0.0104903	0.0492883	-0.0450489	-0.00932976	0
95.8	0.00457409	0.00156881	0.0138597	-0.00704797	0.00138172	-0.0169111	0.0193399	0.00342212	0.00603563	0.00233988	0
96	0.0112451	0.0289017	0.0149191	0.000535622	0.00692529	0.031524	0.0251269	-0.0213491	0.0390185	-0.0098681	0
96.2	0.00385933	0.0280904	0.0240995	-0.00519867	0.000505831	0.0193707	-0.0394356	-0.00251024	0.0399463	0.00753149	0
96.4	-0.0123883	0.0104881	0.0166553	-0.022205	0.0106849	0.0101074	-0.0569918	0.0161685	0.020837	0.0182596	0
96.6	-0.0129456	-0.0342025	-0.0254437	0.0139785	0.0139735	0.031576	0.0150095	0.018574	-0.00327035	-0.0180421	0
96.8	-0.00407181	-0.0679089	0.00634663	-0.00841772	-0.00191451	-0.0383932	0.00638703	-0.0234311	-0.00794862	-0.0177799	0
97	-0.00306442	-0.0418739	0.00522312	-0.0557969	-0.030427	-0.0581239	-0.0114297	-0.0390094	0.00902363	0.010695	0
97.2	0.0243713	-0.0384023	-0.0325408	0.000825526	-0.0158594	-0.0141296	-0.00492498	0.0290833	-0.00634588	0.0229805	0
97.4	-0.017295	0.0403078	-0.0447347	-0.022315	0.011846	-0.0274173	-0.0139178	0.0266118	0.00496886	0.00685449	0
97.6	-0.0298116	0.0390505	-0.00711662	-0.0812089	0.00386935	0.00915813	0.0203691	0.000163998	0.0240718	-0.00105274	0
97.8	-0.00351598	-0.0338181	-0.0119012	-0.0119185	-0.00995679	0.0411104	0.00975755	-0.0173735	0.00329901	0.00239919	0
98	-0.0293715	0.0125042	-0.0575532	0.0936614	-0.00518068	-0.0285472	-0.0553883	-0.0500763	-0.0173782	-0.00750667	0
98.2	0.00948774	0.0226659	0.0129759	0.061206	-0.0290485	0.0389499	0.0713082	0.034907	-0.00419172	-0.00531593	0
98.4	0.0118991	0.0115093	0.0149359	0.00574586	-0.0183465	0.00197482	0.00374788	0.0661973	-0.0140294	0.018747	0
98.6	0.0326764	-0.00149771	0.019151	0.00289045	-0.0167215	0.000106529	-0.00281921	0.0406943	0.00350074	0.0384778	0
98.8	0.00476853	-0.0160791	0.0453053	-0.00538838	0.00621598	0.0223497	0.0351957	0.0306108	0.0128701	0.00527313	0
99	-0.0209196	-0.0118425	0.00734594	-0.0270876	0.0437426	0.0446656	0.0307418	-0.0220469	-0.00461603	-0.0154207	0
99.2	0.00240356	-0.00965994	-0.0509767	-0.0482856	0.0217027	0.0543663	0.0111874	-0.0764138	-0.0106192	0.0168324	0
99.4	-0.00870162	-0.0261643	-0.023832	-0.054973	-0.0273188	0.00638017	0.00711305	-0.0188213	0.0144567	0.0109221	0
99.6	0.0131532	0.0303234	-0.0100672	0.0261592	0.0248321	0.00900002	0.0629319	-0.0163326	0.0454159	-0.0368781	0
99.8	0.0372915	0.0749473	0.0409562	0.00757959	0.0231466	0.0436574	-0.0017871	0.0248937	0.00316598	-0.0194358	0
100	0.0215429	0.0363764	0.0213885	-0.00643562	-0.0418645	0.0354528	-0.0239854	0.00779467	-0.00547199	0.00147508	0
100.2	0.0121911	0.01617	0.0199901	0.0186409	-0.0101697	-0.00656694	0.000904348	-0.0039261	-0.00176662	0.00583906	0
100.4	0.0197428	0.0108855	0.0492741	0.0238239	0.0536136	-0.0236447	0.0170038	0.02639	0.00840973	0.00773361	0
100.6	-0.00621997	-0.0408906	0.0344882	0.0140426	0.010615	-0.0204973	0.0146674	0.0287573	0.0290358	-6.71175e-05	0
100.8	-0.0367193	-0.0427196	0.0301877	0.0299465	-0.0229793	-0.0440677	-0.0412349	0.0063364	-0.0110656	0.00284351	0
101	0.013379	-0.00335007	-0.0366106	0.054558	-0.0158018	-0.0474818	-0.0277045	-0.0530527	0.00482816	0.0346721	0
101.2	0.0156881	-0.00535551	-0.0151034	0.0303989	0.00799551	-0.0218976	0.0104475	-0.00414308	-0.0303202	0.0236637	0
101.4	-0.013361	-0.0299649	-0.0169903	0.00199033	0.0249202	-0.0113829	-0.00921542	0.0184691	-0.0409733	0.00437211	0
101.6	-0.0120928	-0.0393353	-0.0165545	-0.0238608	0.00331644	-0.0256245	-0.0153884	0.00479005	-0.0246541	-0.0205274	0
101.8	-0.00455149	-0.0141295	-0.00540225	-0.00834794	-0.026902	-0.0252675	0.00326626	-0.0129297	-0.0165326	-0.0301074	0
102	-0.0270774	0.00967074	-0.0576004	0.0414195	-0.0257392	-0.000539452	-0.0215014	-0.0587365	0.00127159	0.00473116	0
102.2	-0.0421599	-0.0206171	-0.0409056	-0.0131605	-0.0335164	-3.0243e-05	-0.0101077	-0.026614	-0.0165717	0.00252897	0
102.4	-0.0320734	0.0307279	-0.0388548	0.0151557	0.00509573	-0.0134914	0.00346833	0.00282279	-0.0235588	-0.00812052	0
102.6	0.0114348	-0.0186275	0.016632	0.0080347	0.0294726	0.00689356	-0.0111779	0.0253403	0.00272195	-0.0160222	0
102.8	0.0117374	-0.00356323	0.0399708	-0.0392855	0.0244288	0.0194061	0.0212103	0.0306137	0.015573	-0.0237059	0
103	0.0158245	0.0294441	0.0182129	-0.0568408	0.00110903	0.00615956	0.0381583	-0.00296515	0.0335943	-0.00826208	0
103.2	0.0251684	-0.0175582	0.0184106	-0.0611481	-0.0207682	0.00713743	-0.014741	-0.0246769	0.0263248	0.0215436	0
103.4	-0.0274799	0.0262971	0.00325804	-0.0642186	-0.01697	0.020711	-0.0382021	0.0152673	-0.0331561	0.0121678	0
103.6	0.0399348	0.0180107	-0.0313812	-0.00281335	-0.0174791	0.00745376	-0.0404388	0.0261986	0.0552961	-0.021233	0
103.8	0.0161442	0.0193418	-0.0117151	0.0267221	-0.0139818	0.0171123	0.0499049	0.0274072	0.0529077	-0.0257702	0
104	-0.00563239	0.0328389	0.0321028	0.0505617	-0.0149788	0.00638539	0.0349565	0.0130841	-0.00681337	-0.0280893	0
104.2	-0.00449489	0.0527041	0.0562303	0.0434339	-0.00455265	-0.0124966	0.0275113	-0.0161039	0.024913	-0.0177009	0
104.4	-0.0105386	0.0394354	0.00662314	0.0153763	0.00328899	-0.0272177	0.0509935	-0.0261749	0.028336	0.00346275	0
104.6	0.00599553	-0.0112061	-0.0493268	0.0248179	-0.00035987	-0.0291571	-0.0299769	-0.0165471	-0.0543495	0.0164691	0
104.8	0.0120455	-0.00330617	0.0321481	0.030126	0.0195972	0.0116347	-0.0741237	-0.0359228	-0.00077225	0.0396374	0
105	-0.00852893	0.0282506	0.0445295	-0.00327305	0.0117674	-0.00124458	-0.0557825	-0.0533555	-0.0149584	0.0341146	0
105.2	0.0210545	-0.00391766	0.0286793	-0.0277248	0.0290732	0.0448685	-0.0200304	-0.00326889	-0.0102902	0.00297106	0
105.4	0.00471013	-0.053322	-0.00360197	-0.0418996	0.0168429	0.01194	0.0557726	0.0283586	-0.0184435	-0.0262224	0
105.6	-0.0319836	-0.0505455	-0.0473791	-0.0217351	0.00651185	-0.0433398	0.0450196	0.0147619	-0.0105851	-0.017186	0
105.8	-0.0287384	-0.0326508	-0.0396135	0.0101842	0.00738379	-0.0171124	-0.0453129	0.0104026	0.0148248	0.00118921	0
106	-0.0264357	-0.0485721	0.00252094	0.00391374	-0.0234681	-0.00628872	-0.0400522	0.0101353	-0.0115877	-0.0102462	0
106.2	0.00415783	-0.0341355	-0.0428022	0.0114153	0.000652665	-0.0167405	-0.0309907	-0.0137286	-0.00355426	0.00688799	0
106.4	0.0301399	-0.00362143	-0.0470429	-0.00813626	-0.017309	-0.0397588	-0.0340155	0.0100353	-0.005261	0.0141039	0
106.6	0.0324172	-0.00221391	-0.0117219	0.0325915	0.013131	0.00506442	-0.0051525	-0.0142111	-0.0185886	-0.0131201	0
106.8	-0.00560412	0.00358	0.0137337	0.0362199	0.0236447	0.019351	0.00314305	0.00612331	-0.0224565	0.00405033	0
107	-0.0264031	-0.00257312	0.000269145	-0.00815381	-0.0120682	0.00403229	-0.00315512	0.00851672	-0.00686451	0.0158294	0
107.2	-0.00718304	-0.0222889	-0.016171	-0.0238606	-0.0222525	0.016622	0.00182732	-0.0438016	0.00479226	-0.0194674	0
107.4	-0.00698955	0.0113819	0.0144032	-0.0190818	-0.0171216	-0.000993908	-0.0186529	0.0175293	-0.0152525	0.0047182	0
107.6	0.0239473	0.0246484	0.0292002	0.0550576	-0.00409027	0.019312	-0.0013741	0.00549908	-0.022637	0.0216239	0
107.8	0.0307985	0.014443	0.0434792	-0.00796344	0.0173569	0.0356693	0.0174228	0.0200774	0.0272438	0.0190398	0
108	-0.00264397	0.0386023	0.0158185	-0.0154849	0.025521	-0.00516923	0.0352319	0.0415737	0.0411107	0.00233718	0
108.2	-0.00823714	0.050768	0.00823763	-0.0103832	0.00816396	-0.0174211	0.00888319	-0.0248045	0.00427176	-0.019451	0
108.4	0.0142842	0.0265548	0.00844072	-0.0432691	0.00651932	0.02011	-0.0101567	-0.0332139	-0.0122569	-0.0150696	0
108.6	-0.00918661	0.0105178	-0.0184307	-0.0134473	0.0239142	0.00534207	0.0215647	0.0532102	0.0117818	0.0109134	0
108.8	-0.0447089	-0.00792749	0.0164121	-0.00425715	-0.00480376	-0.0401225	-0.0115206	-0.0519056	0.0168461	0.0053178	0
109	0.00987862	-0.0171555	-0.0413315	0.0143498	-0.00510634	0.00808826	-0.00851502	-0.0419906	-0.0322015	0.0132396	0
109.2	0.00158139	-0.00720078	0.00378595	0.00367289	-0.0150124	-0.00863065	-0.00194146	0.000354503	-0.0229482	0.0120722	0
109.4	-0.00470942	-0.0296703	0.0242968	0.00486845	0.0125527	-0.0176563	0.0200547	0.0320677	-0.0150279	-0.00987361	0
109.6	-0.00192188	-0.0431627	0.0347753	-0.0278453	0.0213137	0.0191596	0.04272	0.0277372	-0.0186077	-0.00701618	0
109.8	-0.00791224	-0.0164444	0.0440424	-0.0460593	-0.0250088	0.0131216	0.0213454	-0.000565297	0.008893	0.0188175	0
110	0.0330061	-0.00195703	-0.0325844	0.0419621	-0.0192462	-0.0183539	-0.00677122	0.0017662	0.0310375	0.0107738	0
110.2	0.0235336	0.0141781	0.0400753	0.0201222	0.0196233	0.0116758	0.0148751	-0.01853	0.0277059	-0.0106191	0
110.4	-0.00571583	-0.0200827	-0.0464201	-0.0163297	-0.0127832	-0.0032452	-0.0382746	0.00638423	-0.0128518	-0.025113	0
110.6	0.00651022	-0.0177876	-0.0393726	-0.0518261	0.000840854	0.000991796	-0.066786	-0.0101022	-0.0318205	0.0241371	0
110.8	0.0219704	0.0586122	0.00884474	-0.012881	0.00432566	0.0310047	-0.0332652	-0.0207565	-0.0189315	0.0385501	0
111	-0.00863568	0.0578086	-0.0630146	0.0504783	-0.0388969	0.0356852	-0.0333291	0.00548771	0.0194887	0.00672431	0
111.2	-0.0517399	-0.0193923	-0.0783044	0.0282269	-0.0491638	0.00272346	-0.0310169	0.000932567	0.0468823	-0.0156238	0
111.4	-0.0360442	0.0220831	0.0610004	0.00335163	-0.0154058	-0.0342419	0.061766	-0.0287288	0.0119669	-0.0454736	0
111.6	0.0270536	-0.00464972	-0.00765846	0.0386018	0.0402361	-0.0195815	0.0191844	-0.0174304	-0.00517008	0.0148425	0
111.8	0.000709483	-0.00224705	-0.0345214	-0.0162017	0.00906511	-0.000614833	0.0706714	0.024675	-0.0127834	-0.0172121	0
112	-0.0213369	-0.0115082	0.0252429	-0.00640159	0.00374528	-0.00809612	0.0422246	0.00243013	0.000470632	-0.0286293	0
112.2	-0.00144541	-0.0138454	0.0556883	0.0340753	0.0308781	-0.00819292	0.0082228	-0.0345196	0.0196366	0.00295059	0
112.4	0.015085	-0.011479	0.0330726	0.0143671	0.0405328	0.00747473	0.0392768	0.0039901	0.0211586	-0.023308	0
112.6	0.0250265	-0.0401827	0.0262189	0.0134638	0.0372978	0.0157258	-0.00657289	0.053656	0.0107671	-0.0493059	0
112.8	0.0238569	0.00141277	0.0500925	0.0227983	-0.00429292	0.0325379	-0.0217897	0.0248066	-0.00163097	0.0270661	0
113	0.0119195	0.0481405	0.00903909	-0.010119	0.00534314	0.0353581	-0.00542063	0.0415921	-0.00753213	0.0248949	0
113.2	0.0401109	0.0317375	-0.0394512	-0.0134398	0.000814818	0.0185247	0.0280316	0.0698035	-0.0115152	0.0350114	0
113.4	0.0444271	-0.00110891	-0.0108288	0.0224929	-0.0216579	0.0206529	0.0133174	0.0334991	0.0130672	0.034591	0
113.6	0.0147481	0.000511068	0.00156291	0.00651089	-0.0243067	0.0160952	-0.00744126	-0.00235629	0.00694842	-0.00153409	0
113.8	-0.00488485	0.0014334	-0.0196258	-0.0567552	-0.019033	-0.0175032	0.0151178	0.00329101	-0.032826	-0.0205226	0
114	-0.0176342	-0.0137633	0.0242577	-0.0431185	-0.020854	-0.0311263	0.0289641	-0.0266063	-0.00789581	-0.0138341	0
114.2	-0.0150796	0.0270402	-0.018593	0.0263307	0.00404617	-0.0298549	0.0412703	-0.0478886	0.0143054	-0.0124618	0
114.4	-0.0365154	0.00139099	-0.0546066	0.0335462	0.00150645	-0.0292763	0.0184197	0.00299031	0.00125638	-0.0114704	0
114.6	-0.0355122	0.00416421	-0.0160977	-0.00503529	0.00566924	0.0308354	-0.0442089	0.0168146	-0.00485263	-0.00457918	0
114.8	0.00152557	0.0191793	-0.00121002	0.0316596	-0.0277809	0.0105327	-0.0350819	-0.0288516	-0.00432029	0.00281676	0
115	0.00141201	-0.0147269	-0.0060546	0.0188175	-0.049506	-0.0449409	0.0206592	-0.0533055	-0.0194787	0.00172058	0
115.2	-0.0290806	-0.0425388	0.0454426	-0.0651228	-0.00147656	-0.00113997	0.00393648	-0.0175954	-0.0188983	-0.00517681	0
115.4	0.0028472	-0.00676979	0.0592974	0.0379582	0.00426291	-0.0029324	-0.0575239	0.0180275	0.0287169	-0.0115404	0
115.6	-0.0129662	0.0264625	-0.0136654	-0.00544537	0.0117395	-0.0086564	-0.116514	-0.0102083	0.0391554	-0.0214229	0
115.8	-0.0162263	-0.0409032	-0.0153518	-0.0498258	0.00454138	0.0105485	-0.0180447	0.0352491	0.00235729	0.0184837	0
116	0.00021386	-0.0063711	-0.0147316	-0.0121547	-0.00496453	0.00965018	0.0189621	0.0248225	-0.0173722	0.039554	0
116.2	0.0219542	0.0216265	-0.0206393	0.00435271	-0.000912427	-0.0101169	-0.0222193	0.00264685	0.00363667	0.014187	0
116.4	0.0288275	-0.0261261	0.0103022	-0.0124356	0.0136596	-0.0142375	-0.00459369	0.025271	0.0231089	0.00537767	0
116.6	0.00524672	0.000251136	0.0255226	0.00123623	0.0180333	-0.00975594	0.0246232	0.00284924	0.0128098	0.024403	0
116.8	0.00174766	-0.035289	0.0108193	-0.0163607	-0.00630578	-0.0111038	0.00387475	0.00739464	-0.00330067	0.00666159	0
117	0.0436612	-0.0139574	0.012913	0.00580356	-0.00180343	0.0110991	-0.0145751	-0.014264	-0.0266634	0.0005716	0
117.2	0.0389898	0.0206813	-0.00304714	0.00822141	0.0477522	-0.0105509	0.00837849	-0.0448448	-0.00187001	-0.0266715	0
117.4	-0.0190722	0.0212471	-0.0611476	-0.0232035	0.0636548	0.00978385	0.0406655	-0.0496979	-0.014361	-0.00401374	0
117.6	-0.0359641	0.0174039	-0.0273211	-0.0101759	0.014425	0.0182366	0.00648899	-0.0286413	-0.0364789	0.0253819	0
117.8	0.00416304	0.0389093	0.0570896	0.017093	-0.0307129	-0.0473398	-0.0442232	-0.0198461	-0.00727315	-0.0130402	0
118	0.00615019	0.0478675	-0.00240975	-0.0143872	-0.0250816	-0.0374012	-0.00983444	-0.0350411	-0.0202991	-0.0382709	0
118.2	-0.0292179	0.0049711	0.00842165	0.0311581	-0.0233149	0.0262812	-0.0168092	-0.0068647	-0.0495243	-0.0346565	0
118.4	-0.0403083	0.0156204	-0.0699559	-0.0389375	-0.0230658	0.0388108	-0.00485595	0.0303305	0.00445284	-0.00824896	0
118.6	-0.0270476	0.0127881	-0.0582133	0.0172683	-0.00315125	0.00667919	-0.0237833	-0.00248466	-0.000109589	-0.00855665	0
118.8	-0.0267501	-0.01723	0.00946144	0.0275365	-0.000409596	0.00987939	0.00889189	0.00381519	-0.0159284	0.0113234	0
119	-0.0025023	-0.0601747	-0.00247462	-0.0756292	0.00197638	0.0142518	0.0339398	0.0267589	0.0055218	0.0432117	0
119.2	0.0267851	-0.0918961	-0.0175869	-0.0293679	0.00837873	-0.031905	-0.0351009	-0.0159578	-0.00577768	0.0296161	0
119.4	-0.0359585	-0.0455421	0.0303856	0.0499325	-0.0411048	-0.025087	0.0111446	0.0198959	-0.00421623	0.0208265	0
119.6	-0.000378705	-0.0254095	0.0138162	-0.0053356	0.00208729	0.0291403	0.078606	0.0301972	0.0239206	0.00542782	0
119.8	-0.00816581	-0.0142844	-0.0175434	0.0292178	0.00360299	0.00164813	0.0209642	0.0248143	0.0571068	-0.00111666	0
120	-0.0225956	0.00491744	0.0108671	0.0611047	0.0319227	-0.0370317	-0.0541427	0.0236941	0.0695419	0.0075336	0
120.2	-0.0025727	0.0151242	0.0413816	0.0327325	0.0537172	-0.0157094	-0.0445545	0.00534894	0.0402079	0.0124064	0
120.4	0.0117718	0.0257558	0.0360138	-0.00270307	0.0222018	0.00214392	0.00159629	-0.0242511	0.00399971	0.0190171	0
120.6	0.0131211	0.0432844	0.0343287	-0.0257905	0.0320914	-0.0243583	0.0129711	-0.0320599	0.00158801	0.0424511	0
120.8	0.00108676	0.0357855	0.00575441	0.0309631	0.0399245	-0.017855	0.00325027	-0.0381145	-0.0149542	0.0414842	0
121	-0.0119596	0.0754093	0.00594891	0.0284687	0.024428	-0.00559335	0.015575	-0.0425139	-0.0139593	0.00913941	0
121.2	-0.0234277	-0.0110109	0.0252804	-0.0200836	0.0222629	0.00986923	0.0205497	0.035982	0.0423601	-0.0264063	0
121.4	-0.0280543	-0.0528772	0.00351488	0.0243019	0.0417853	-0.00988649	-0.00164958	0.0329581	0.0556811	-0.0168847	0
121.6	-0.00328592	0.0274813	0.0121589	0.0827836	0.0426355	-0.00894707	0.00304756	-0.00994066	0.0240004	0.0104952	0
121.8	0.027039	0.0525409	0.0787243	0.032461	0.0235927	0.0135556	0.0475675	0.0465245	0.0270384	0.00146038	0
122	-0.00472523	0.00739229	0.0631293	-0.00226143	0.0285964	-0.0207658	0.0478705	0.0542126	0.0330262	-0.0108563	0
122.2	-0.0457117	-0.0029386	0.0229732	0.0173541	0.0220003	0.0604859	0.0131503	0.016171	0.0176875	0.0147737	0
122.4	0.0267291	-0.0191876	0.0399941	-0.0184883	0.0097651	0.0262064	0.0294233	0.0502541	0.00829123	0.00280936	0
122.6	0.043318	0.0107506	0.0788543	0.0321636	0.0231947	0.00626086	0.0572115	0.061996	0.0300897	0.0149852	0
122.8	0.0247367	0.0471134	0.0241618	0.0805027	0.0204068	0.0416398	0.037804	0.0372458	0.0367551	0.0163455	0
123	0.0749649	0.0445771	-0.00488087	0.0788688	0.0183713	0.0595377	0.0250097	0.0693588	0.0498488	0.0427676	1
123.2	0.138844	0.0599232	0.10362	0.113678	0.0796315	0.104045	0.0821496	0.148525	0.10543	0.115623	1
123.4	0.17499	0.115034	0.122099	0.093129	0.135311	0.190131	0.15638	0.166641	0.114648	0.063692	1
123.6	0.195437	0.15294	0.156524	0.146256	0.129037	0.184989	0.224999	0.140019	0.124546	0.104042	1
123.8	0.106596	0.140371	0.136402	0.0408998	0.103886	0.108176	0.182221	0.110625	0.108444	0.0888519	1
124	0.0928718	0.152	0.146177	0.0569441	0.0783918	0.0560709	0.156542	0.110122	0.0814008	0.0657518	1
124.2	0.129612	0.100026	0.15584	0.150349	0.0588768	0.0779035	0.130644	0.130006	0.08245	0.0658061	1
124.4	0.083787	0.0477995	0.102239	0.110264	0.0619927	0.0992148	0.0783776	0.145139	0.0804026	0.045385	1
124.6	0.0416465	0.144008	0.0758538	0.117733	0.0670816	0.0401432	0.0866221	0.12978	0.0457302	0.0412678	1
124.8	0.0306305	0.0661968	0.0610976	0.149426	0.0152423	-0.00961958	0.0208922	0.0634726	0.048461	0.037747	1
125	0.0438171	0.053056	0.0272481	0.0447207	-0.0371971	-0.0183469	0.0554393	0.0331765	0.00390858	-0.00435904	1
125.2	0.00778723	0.0887568	0.0987049	0.00665405	0.0212392	-0.00882912	0.0265687	0.0497478	-0.0342545	-0.00630615	1
125.4	-0.000806552	0.058603	0.085018	0.0471554	0.0369505	0.0154613	0.0189285	0.0548229	-0.00588639	0.00956415	1
125.6	0.0304417	0.0303406	-0.0070368	0.0281305	0.000680039	0.00889712	0.015722	0.0095961	0.0247103	-0.000677209	1
125.8	0.0231627	0.0574604	0.00562213	-0.0233018	-0.00286666	-0.045638	-0.0324767	-0.0482941	-0.00614116	-0.0208196	1
126	0.00649703	0.0398189	0.0120576	-0.014391	-0.0648713	-0.0623684	0.0381081	-0.0432772	-0.0378472	-0.0407419	0
126.2	-0.000866429	0.0462203	0.0217898	-0.0409014	-0.0309362	-0.045375	-0.0419204	0.0206118	-0.0321863	-0.0438189	0
126.4	-0.0105096	0.0138621	0.0140496	-0.0138244	-0.0272553	-0.0551796	-0.01452	0.0429273	-0.0164093	-0.0195537	0
126.6	-0.0237872	-0.00656312	0.00851324	-0.00616591	-0.0314045	-0.022247	0.0285984	0.0728355	-0.0141218	-0.0254655	0
126.8	-0.00600916	0.010961	0.0287804	-0.0119135	-0.026851	0.0178752	0.0177863	0.0414729	-0.0373146	-0.0345334	0
127	-0.004881	0.00613496	0.0469127	-0.0064502	-0.0475349	0.00181294	0.0470149	-0.00648519	-0.0381726	-0.0306315	0
127.2	-0.0432983	-0.0379938	0.0321929	-0.0184122	-0.0621994	-0.027357	0.0729352	0.0621185	0.0057587	-0.0388634	0
127.4	0.00336346	-0.0365849	0.0136894	-0.000344509	-0.0328641	-0.0263649	-0.0145624	0.0675142	0.000335966	-0.0135978	0
127.6	0.00203893	0.0238375	-0.00100597	-0.0280911	-0.0343114	0.0203916	-0.00428091	-0.00570622	-0.0196417	-0.0179973	0
127.8	0.00268578	-0.0335729	0.00082166	-0.0432253	-0.0421283	-0.00127083	0.00106158	-0.00216832	-0.0232111	-0.0228834	0
128	-0.00744157	-0.0445526	0.0117508	-0.056403	0.00230928	0.00290321	0.0382951	-0.0195305	-0.00220494	-0.0278211	0
128.2	-0.0144908	0.00991972	0.0173427	-0.0613365	-0.0177742	0.0173069	0.0496094	-0.0333446	-0.00400326	-0.0643632	0
128.4	0.00838412	0.00604072	0.00798594	-0.0503448	-0.0781502	-0.00794843	-0.0295803	-0.00250879	-0.0216533	-0.0930521	0
128.6	0.01025	-0.00905609	-0.0380458	-0.0414633	-0.00817914	0.019009	-0.0486869	-0.0377338	-0.00572118	-0.0567833	0
128.8	-0.00423985	-0.0542832	-0.0955778	0.0188948	-0.027891	0.0175164	0.00566194	-0.00760189	-0.0239714	-0.0278731	0
129	-0.00627907	-0.0311885	0.0276562	-0.0130554	-0.00503185	-0.0116877	0.0234897	-0.00246413	0.034805	-0.00135452	0
129.2	-0.00800266	0.0171109	0.0368765	-0.00433321	-0.0166713	-0.0262415	-0.0207149	0.0364242	0.0341643	0.0112052	0
129.4	-0.00686115	0.0311982	0.0146675	0.000355209	-0.0302021	-0.0197736	-0.0416152	0.0421343	-0.0126044	0.0167561	0
129.6	0.00635284	-0.00456099	0.0172928	-0.0111417	0.00244932	0.00683005	-0.0119927	-0.0192352	-0.0113745	0.0371432	0
129.8	0.0178294	-0.0260077	-0.02564	0.0296027	0.0186779	0.0267202	0.0145155	-0.0298856	0.00076832	0.0607721	0
130	0.00148246	0.0352434	0.0588594	0.00505129	0.0139373	-0.000710923	0.0119976	0.0288859	-0.019879	0.0534213	0
130.2	-0.0343901	0.0180561	0.0214077	-0.0496421	0.02154	-0.00190826	-0.0269664	0.0277439	-0.00408296	0.0340289	0
130.4	0.0167578	-0.0548099	-0.0483833	-0.0328756	0.0172738	-0.0371093	0.00828431	-0.0101756	0.00600113	0.0330823	0
130.6	0.0139556	-0.0143744	-0.0236781	0.0218011	-0.00363072	-0.0423723	0.058752	-0.0315087	0.0225963	-0.00396227	0
130.8	-0.0353099	0.0332579	0.0172846	0.0291161	0.000947381	-0.0134843	0.0513826	-0.0218259	0.00876627	-0.046591	0
131	-0.0348327	0.0233059	0.0116861	-0.00124315	0.0083558	-0.0109021	0.0198107	-0.0114552	-0.0222782	-0.0363928	0
131.2	-0.0273735	0.0549404	-0.00806692	0.00283005	-0.0270926	-0.015708	0.00490318	-0.0297177	-0.0142248	-0.0236858	0
131.4	-0.0172471	0.00655151	-0.0630846	0.0260639	-0.0273122	0.0117423	-0.0166926	-0.0428646	-0.0406242	-0.0477311	0
131.6	0.0308891	0.00574258	0.00304543	-0.00138207	0.00173618	0.0173011	-0.0178133	-0.000405412	-0.023825	0.000135218	0
131.8	0.00524735	-0.00290373	-0.00164212	-0.0401805	0.0176558	0.00721582	0.00111739	0.0515124	-0.00834014	-0.00222671	0
132	-0.00873979	-0.0101066	-0.0190468	-0.0475638	0.000251969	0.000239918	0.0462031	0.0250206	0.0197607	-0.0375097	0
132.2	0.0300817	-0.0163342	0.0206569	-0.00773586	-0.00626911	0.0290557	0.0327155	-0.00355166	0.0333607	-0.0214137	0
132.4	0.0294743	-0.0318126	0.0295677	0.0437115	0.0200435	0.0390618	-0.0378427	0.0194991	0.0176528	0.0127213	0
132.6	-0.00853193	-0.0135989	-0.00449138	0.0359411	0.0184727	-0.0299514	-0.02964	-0.00277853	0.0347336	0.00369481	0
132.8	-0.00622572	-0.0160604	-0.0181131	-0.00501541	-0.0220931	0.00587813	-0.0253233	0.0171946	0.0140797	-0.00152321	0
133	0.012059	-0.0218179	0.01668	0.0226715	-0.0220582	0.0424074	0.0112328	0.0685063	-0.00935803	-0.00828607	0
133.2	1.55554e-05	0.0121424	-0.0034114	0.000556389	-0.0125812	0.0204516	0.0110032	0.00650175	-0.0221566	0.00672996	0
133.4	0.00748722	0.0219588	0.00058861	-0.00939359	0.0138392	0.00774075	-0.0197413	-0.0373117	-0.0244241	0.00684294	0
133.6	0.0328438	0.0106151	0.00591261	0.0324875	0.0218625	0.0168125	-0.0159578	-0.00810894	-0.0140714	0.00745666	0
133.8	0.00947722	0.0103164	-0.040882	0.00343388	-0.014129	0.00946018	0.0193398	-0.0201305	-0.00726357	0.0331103	0
134	-0.0201898	-0.0418915	0.0250463	-0.0438656	0.0069304	0.0195776	0.0315595	0.0020545	-0.0179739	0.00618579	0
134.2	-0.00592914	-7.21517e-05	-0.029991	0.0431138	0.00736158	0.0138698	-0.00663686	0.0192177	-0.00469115	0.00749749	0
134.4	-0.034408	0.013546	-0.0436582	0.00714014	0.00744414	-0.013443	-0.0391197	-0.0153905	0.0113884	0.018533	0
134.6	0.00164147	-0.017425	-0.0124131	-0.0248608	0.000389615	-0.0473816	-0.0124965	-0.0293173	0.00165427	0.00582236	0
134.8	0.0310975	-0.0112477	0.0210631	-0.0186064	0.00879059	-0.019775	0.0110551	0.0236273	0.0074481	-0.0151342	0
135	-0.0322153	0.000951329	0.0208566	-0.0360603	-0.00544101	0.0150684	-0.00316309	0.0482987	0.00816283	-0.00971458	0
135.2	-0.0258658	-0.0325188	-0.0110122	0.0119151	-0.0507851	-0.0346299	-0.00169054	-0.0283009	-0.046194	0.0175945	0
135.4	0.0673189	0.00161614	0.0655832	0.0487806	0.0359535	-0.0137838	-0.00646037	-0.0717258	-0.0249662	0.0191729	0
135.6	0.0338446	0.0249471	0.0323738	0.000503827	-0.011739	0.00251613	0.00546614	-0.0323642	0.0586945	-0.00882221	0
135.8	0.00617602	0.0579776	-0.0234163	-0.00100242	-0.0174432	-0.000151967	-0.00342269	-0.00411035	0.0435329	-0.00480744	0
136	-0.000421364	0.0456672	-0.0234228	0.00388825	0.00323335	7.7805e-05	0.0125331	-0.00562535	0.0143382	-0.0281391	0
136.2	-0.0158172	0.0109731	-0.0155123	0.00923947	0.00581639	-0.0146556	0.0144736	-0.00506609	0.00732948	-0.0505355	0
136.4	-0.0150815	0.0332153	0.00326561	0.0254058	0.0169607	-0.0250586	-0.00390789	0.0160931	-0.0241148	-0.0156397	0
136.6	-0.0226889	0.0430929	0.0664264	-0.0363679	-0.0233441	0.0164429	0.0509857	0.0375248	0.00636106	-0.00979524	0
136.8	-0.0119029	-0.018758	0.040929	-0.0293695	-0.00205838	0.0171558	0.000925244	-0.0195272	0.0434205	-0.00333109	0
137	0.0114126	-0.0319241	-0.010807	-0.0440689	0.0120466	0.0170857	0.00126782	-0.0260481	-0.0192221	-0.00505756	0
137.2	0.0185463	0.0158083	-0.0385481	-0.00727283	-0.00809449	-0.0019809	-0.0197861	0.0554863	-0.0191827	-0.00407683	0
137.4	-0.00759371	0.0133051	-0.0270133	0.0769246	-0.0228534	-0.00313699	-0.0030721	0.0516136	0.00182074	0.00955927	0
137.6	-0.00623857	-0.0197154	0.0109255	0.0667009	0.00473316	0.00372115	0.0471836	-0.00505421	-0.0311528	0.000524421	0
137.8	0.0221219	0.0040594	0.02948	-0.0205137	0.0313507	-0.0163776	-0.007879	0.0220768	-0.0234644	-0.0326811	0
138	-0.0337788	0.000282383	0.00317971	0.00525821	-0.00776957	0.0139912	-0.0509432	-0.0262176	0.00583663	-0.0107153	0
138.2	0.00638965	-0.00478311	-0.0145209	0.0229088	0.0158359	0.00222515	-0.029119	-0.0195632	-0.00501258	0.0224466	0
138.4	0.0587063	0.0311176	0.0140145	0.0366874	0.0515266	-0.0127973	-0.0462842	-0.0220495	0.0165059	0.0181525	0
138.6	0.0359308	0.0265468	-0.000503541	-0.0111144	0.0148868	0.00780037	-0.0177106	-0.00530696	0.0292762	0.026622	0
138.8	0.0102906	-0.0245716	-0.0178734	-0.0548901	-0.0217747	0.0135232	0.0187262	0.00786791	-0.010702	0.0414	0
139	-0.000104645	-0.0286493	0.0117016	-0.0391322	-0.0123392	0.00394602	-0.00116983	-0.0179955	-0.0324956	0.0198941	0
139.2	-0.0424191	0.00285376	-0.00247752	-0.0267054	-0.0209962	0.0329598	0.0196475	-0.00772305	0.0140042	0.000666988	0
139.4	0.00318691	-0.0419643	-0.021036	0.033235	-0.00260366	0.0202092	0.0294784	0.0360735	0.0336117	0.0152265	0
139.6	0.000424432	-0.0567696	0.0165412	-0.0509561	-0.0345668	-0.0146814	0.00850381	0.0553884	0.0193761	-0.00249785	0
139.8	-0.0101043	-0.0643496	0.0292906	-0.0210529	-0.033982	-0.00442522	0.0267153	-0.0107737	0.000894951	-0.0146776	0
140	-0.00820252	-0.00774497	-0.00597584	0.0348782	0.00794416	-0.0331607	0.0119184	-0.0381718	-0.0172556	0.00742308	0
140.2	-0.0081461	0.0475249	-0.0142891	-0.00671017	-0.00949332	-0.0308491	-0.0144777	0.00808944	-0.0277682	-0.00113487	0
140.4	-0.00866781	0.00664963	0.0204645	-0.0157708	-0.0356716	0.0367326	0.0224626	0.00815526	-0.0136471	-0.0298882	0
140.6	-0.0212399	-0.00311731	0.0138465	0.0237564	0.0570559	-0.0296907	0.00368117	-0.0399904	0.0131316	0.0152935	0
140.8	-0.0186858	-0.00286652	-0.0227779	0.0385375	0.0289193	-0.00154283	-0.0626498	-0.0405424	0.0165445	-0.0089587	0
141	-0.0237811	0.0211976	-0.0138068	-0.0187193	-0.0286738	-0.00448224	-0.00733096	0.0154929	-0.00864112	-0.0141562	0
141.2	-0.024525	0.0460375	-0.0088896	-0.014656	0.005104	-0.0197737	-0.00471751	-0.00384727	0.0169458	0.0214093	0
141.4	-0.015777	0.0258331	-0.0328115	0.0243793	0.0334452	-0.0110125	-0.0516098	-0.00632318	0.0128717	0.00760233	0
141.6	-0.00547386	-0.00478156	-0.0311275	0.00490832	-0.00383553	-0.00501225	-0.0276009	0.0339935	-0.0248528	-0.0174156	0
141.8	0.010617	-0.00903555	0.00632402	-0.0257549	-0.0193255	-0.0039092	0.0111754	-0.0155498	0.00471427	0.0173388	0
142	0.0215947	-0.0376046	0.00390633	-0.0305654	-0.00955736	-0.00829471	0.0204712	-0.0334472	-0.0133072	-0.00567106	0
142.2	-0.00389503	0.0236195	-0.02294	-0.0409877	0.0313018	-0.030638	0.0090003	-0.011688	-0.0183866	0.0315611	0
142.4	0.0312107	0.00604934	0.0492564	0.0250196	0.0141244	-0.0129294	-0.0298161	0.0122942	-0.0171882	0.0224557	0
142.6	0.0333068	-0.0557112	0.0611519	0.0739501	-0.0106205	0.0213643	-0.0589305	0.0234897	-0.022124	-0.0160878	0
142.8	0.0161996	-0.0584275	0.00366203	0.0218329	-0.00461106	0.016917	0.000344693	0.00856443	-0.0262351	-0.00481281	0
143	0.0292707	-0.0346769	0.00470778	-0.0184909	0.00119631	0.00288406	0.0503856	-0.0227267	-0.0200904	-0.000117818	0
143.2	-0.00372601	-0.0176536	0.0144211	0.0408793	0.00449084	0.0199267	-0.0250649	-0.0110167	0.00659559	-0.0469322	0
143.4	0.0200632	0.0381138	0.0301148	0.0375926	-0.00130446	-0.000270713	0.0390655	0.0377148	0.0473636	-0.00148186	0
143.6	-0.0123438	0.0296037	0.0199853	-0.0173275	0.0114439	0.0194867	0.0440538	-0.0484913	0.0449193	0.000364612	0
143.8	-0.0219624	0.0190454	-0.0243757	-0.0642899	0.0174329	0.028573	0.00761	0.0199687	0.00558111	0.0072418	0
144	-0.008724	0.0263729	-0.0369613	-0.00473254	0.00611851	-0.00222952	0.0233511	0.0682684	-0.00306085	0.0107179	0
144.2	-0.0190972	0.00175385	-0.00968892	0.0529627	-0.0195289	-0.0174283	0.0190508	-0.00250977	0.0258069	0.0171652	0
144.4	-0.0203509	-0.0192459	-0.00817178	-0.0225546	-0.0321621	-4.63898e-06	-0.0200397	0.00830161	0.0185156	0.047819	0
144.6	-0.00576667	0.0231228	-0.0303903	-0.0411311	-0.00985678	0.00185459	0.0376574	-0.00665042	-0.0368965	0.00726334	0
144.8	-0.0169994	0.00366241	-0.0302387	0.0353071	-0.0493192	0.0187516	0.00434831	0.0176864	-0.0346747	-0.0293489	0
145	0.0130556	0.0139573	-0.0252847	-0.00463803	-0.0191148	-0.00185049	0.00942822	0.0174154	-0.00468807	-0.0134191	0
145.2	0.00555189	0.0412712	-0.0294376	-0.00409144	0.0465033	0.00394023	-0.00587989	0.018448	0.0316451	-0.00829816	0
145.4	-0.00975915	0.0159155	0.0103709	-0.00786378	0.0349567	-0.00217446	-0.0117503	0.00169014	0.0202137	-0.0309511	0
145.6	0.0052193	-0.0265462	0.0560334	-0.0526807	-0.0210549	-0.0198892	0.00398363	-0.0363528	-0.011029	-0.0234359	0
145.8	-0.00611261	-0.0194056	0.026832	0.019514	-0.0245393	0.0257975	-0.0362842	-0.0330071	0.0170478	0.00942746	0
146	0.0176137	-0.0105155	0.0207692	0.0325762	-0.0115178	0.0080175	0.00489161	-0.0201607	0.00870386	-0.0101369	0
146.2	0.0168883	0.000541067	-0.00793645	0.024561	0.0106325	-0.00366693	0.0109495	0.020896	-0.0268535	-0.0132135	0
146.4	0.0122301	0.0189437	0.0194635	-0.0271884	0.0186579	0.0188396	-0.000412869	0.00740789	-0.00989987	-0.0288982	0
146.6	-0.000956874	0.0163918	0.0537009	-0.0350788	0.0163527	0.0361264	0.0339324	0.0187916	0.0387058	0.00603613	0
146.8	0.00363408	0.00318692	0.0108615	0.00693854	0.00538286	0.0170477	0.0364197	0.0169039	0.0306706	0.0375784	0
147	0.0213851	-0.000499434	-0.0399743	0.01729	-0.00197898	-0.00842051	-0.02706	-0.0150374	-0.0113051	-0.0126145	0
147.2	-0.0119647	-0.0117274	-0.00378953	0.0126787	0.0145486	0.000784461	-0.0188591	0.055797	-0.0014545	-0.0155693	0
147.4	-0.00771019	-0.00454808	0.0155504	-0.00232901	0.00740715	0.00185525	0.0216569	0.00371867	-0.0275394	0.0432189	0
147.6	0.0263585	0.00390878	0.000467252	-0.0329035	0.00370928	-0.0249859	-0.0524743	-0.0507687	-0.0154141	-0.0140428	0
147.8	0.00650963	-0.0111828	-0.00637468	0.0200636	0.00849723	-0.0471172	-0.00543958	-0.019271	0.0186964	-0.0136197	0
148	-0.0194875	-0.0245455	0.0151941	0.0303738	0.00184634	-0.0084854	0.0261838	-0.00572289	0.00912098	0.00029388	0
148.2	-0.0279338	-0.0285782	-0.00532064	-0.0268451	-0.0147098	0.0372776	-0.0473246	-0.0504127	-0.0351662	-0.028715	0
148.4	-0.0418425	-0.0459194	-0.0703311	-0.00331131	-0.0176537	1.29785e-05	-0.032364	-0.0429679	-0.0440769	-0.0062652	0
148.6	0.00183376	-0.0447302	-0.0330604	0.0144924	-0.00779601	-0.0435179	-0.013889	0.016524	-0.0122985	-0.0106745	0
148.8	0.00218503	0.0150108	0.0108578	-0.0152349	-0.0109416	-0.0065599	0.00165916	-0.0230368	-0.0247349	0.00430912	0
149	0.0202371	0.0580835	-0.00792916	-0.017425	0.00979117	-0.00474826	-0.00622346	-0.0199378	-0.0103692	0.0241698	0
149.2	0.00969797	0.0232656	-0.0280545	-0.00345911	0.00584292	-0.0137252	-0.0417316	0.0149048	0.0246987	0.0213577	0
149.4	-0.0281225	-0.0223655	-0.0296887	0.0065583	0.00967244	-0.0170555	-0.0141644	0.0264659	0.0307199	0.000236313	0
149.6	-0.013429	-0.0118447	-0.0285249	0.0222549	0.00749165	-0.0407527	0.0294152	0.045223	-9.73007e-05	-0.00380572	0
149.8	0.0314323	0.0189621	-0.00662273	0.021644	-0.0456188	-0.0293744	-0.00989902	0.0614726	-0.0305612	0.0123656	0
150	0.0024937	0.0407478	0.0185993	-0.00300684	0.0226383	0.0420138	0.0590312	0.00750496	-0.00278717	-0.00330078	0
150.2	-0.0537866	0.0199894	0.0529476	0.0377275	0.00690299	0.0257674	0.0349128	-0.00587616	0.0693509	0.0139422	0
150.4	-0.0312454	-0.042296	0.0273373	0.00224998	0.00811078	0.00392463	0.0188451	0.0186818	0.0485362	0.0485018	0
150.6	0.0133942	-0.00310343	-0.00300629	-0.0555015	-0.00492676	0.0102876	0.0222464	-0.0200147	-0.00785873	0.0213184	0
150.8	0.0185374	0.0377564	-0.0106259	-0.0307623	-0.0164319	0.00392477	-0.012424	-0.0277283	-0.0334515	-0.00395316	0
151	0.00704209	-0.0104802	-0.0190634	0.0299008	0.02403	-0.00320032	-0.0278596	0.0225382	-0.0155565	0.0229599	0
151.2	-0.00275879	0.0459356	0.0069957	0.0467654	-0.0089092	0.0229633	0.00631316	-0.0453687	0.0572566	-0.0089073	0
151.4	0.0176076	0.00450473	0.020379	0.000315614	-0.0289587	0.0311478	-0.0203151	0.00983996	-0.00337513	-0.0198776	0
151.6	-0.00041016	-0.00430496	0.0571995	0.0182858	-0.0361062	-0.0355608	-0.00310772	-0.00249984	-0.0357516	-0.0191735	0
151.8	-0.00189257	0.00471179	0.0105308	-0.0119432	0.00178701	-0.014389	-0.0187965	-0.0555225	0.00610862	-0.040321	0
152	0.032143	-0.024227	-0.0349855	-0.00696987	0.0354617	0.00209436	-0.0579799	-0.043696	-0.00752439	-0.0219464	0
152.2	0.0336925	-0.0256071	-0.0058308	0.0242711	0.0221581	-0.0195662	1.6804e-05	0.0248358	-0.0194349	-0.000975222	0
152.4	-0.0063762	0.0280157	0.0069666	-0.027632	0.00110368	0.0219906	0.0847449	0.059155	0.0555415	-0.0361673	0
152.6	-0.0106365	0.0145088	0.0164296	0.0447945	-0.0108522	-0.0331916	0.00618205	0.00226184	0.00484364	0.00907617	0
152.8	-0.0102631	-0.024668	-0.0159711	0.00827704	0.0130447	0.012523	-0.023999	-0.00642806	-0.00724546	0.00994031	0
153	-0.00182868	-0.0118415	-0.029748	-0.0510341	0.00997862	0.0271718	-0.0178647	0.0321501	-0.023634	0.00630344	0
153.2	-0.00386153	-0.0159445	-0.0371935	-0.0605428	-0.000161365	0.0193029	-0.00325831	0.0274117	-0.0136093	0.0344366	0
153.4	-0.00219273	-0.0418897	-0.00531912	-0.00903538	0.0141862	0.0196831	0.0162179	0.00591712	-0.00251126	0.0227828	0
153.6	-0.0148706	-0.0124696	0.0688184	0.0323769	0.0185411	-0.0114483	0.0155137	-0.00458478	-0.0392012	-0.00785545	0
153.8	-0.047207	0.0450701	0.0681463	-0.0324435	-0.00251153	-0.0237314	0.012218	-0.0544565	-0.0251571	0.0256225	0
154	0.0422666	0.0338351	0.00115358	-0.057687	0.00570322	0.0353469	0.0542604	-0.0541503	0.0657789	-0.0044664	0
154.2	0.0481183	-0.0185871	-0.0201649	0.0596123	-0.00958396	0.000745928	0.0042464	0.00268818	0.0150685	0.0254607	0
154.4	0.00725009	-0.0313066	-0.0184175	0.0514476	0.00151195	-0.0165306	-0.00130664	0.040715	-0.0155853	0.00568082	0
154.6	-0.000980458	-0.00689787	0.0123807	0.0220865	0.0188564	0.0128803	0.00983002	0.0421956	0.0238119	-0.00852244	0
154.8	0.0162188	0.0191117	0.0148987	0.0207628	0.0156909	0.019311	0.0105507	0.0293487	0.0321785	0.0320339	0
155	0.0129616	0.025495	-0.0353685	-0.0251477	0.00515228	-0.00232847	0.0324824	-0.00129993	0.00610045	0.0178898	0
155.2	-0.0310381	0.00572984	-0.0135131	0.0514917	-0.0241308	-0.00871258	-0.0139869	-0.0423262	0.0025771	-0.0400421	0
155.4	-0.036765	0.00984738	-0.00718761	0.0120482	-0.0230373	0.0349575	-0.0181085	-0.0259027	-0.0075737	-0.0229497	0
155.6	0.0149031	-0.0286223	0.0472676	-0.0187028	-0.00744769	0.031049	-0.0224526	0.0174991	-0.0128338	-0.0273715	0
155.8	0.00376873	0.0197823	0.000316336	-0.00773525	0.0148501	-0.00495143	-0.0381934	0.00802036	-0.000963899	-0.00459059	0
156	-0.019543	0.0697568	-0.0228439	-0.00611467	0.0181796	-0.0458276	-0.0242869	-0.00313599	-0.0124917	0.0305004	0
156.2	0.000841699	0.0016415	0.0257072	-0.0295468	-0.00136057	-0.0555958	0.00831619	0.0141132	-0.0241333	-0.000279451	0
156.4	-0.00414417	-0.0525459	-0.0252823	-0.0443475	-0.00564678	-0.0311508	0.00571919	0.00507712	-0.00845752	-0.0278029	0
156.6	0.00676398	-0.0226691	-0.00805651	-0.00500119	0.0019672	-0.0611548	-0.0197645	0.0136376	-0.0579895	0.0337107	0
156.8	-0.0110868	0.00676651	-0.0576825	0.012739	-0.0164768	0.00432515	-0.0190728	0.00332188	-0.0246601	-0.0164604	0
157	0.000728306	-0.0402512	0.00716164	-0.0470496	-0.026087	0.0305304	0.0361376	-0.000205375	-0.00713168	-0.0171972	0
157.2	0.0255509	-0.0158933	0.0662247	-0.0381753	-0.000101755	0.0170234	0.0451169	-0.00637972	-0.00173105	-0.000390304	0
157.4	0.026215	0.0412794	-0.00123018	0.0377551	0.0139428	0.00580398	-0.00125694	-0.00846035	0.0245312	-0.0217106	0
157.6	-0.000502928	0.0216321	-0.0381848	0.0363316	-0.00870094	-0.0244278	-0.0204138	0.00821635	0.0394481	-0.0231426	0
157.8	-0.0284266	0.0261034	0.033858	-0.00117659	-0.00756076	-0.0364324	-0.0223256	0.00835686	0.0314264	-0.0107158	0
158	0.0115185	0.00748314	0.026217	0.0366225	0.0154583	0.00992377	-0.0272229	-0.0062935	0.00404004	0.000500058	0
158.2	0.0137552	0.030272	0.00131576	0.0271396	-0.0191995	0.0377457	0.0250471	0.0225527	0.0189731	0.000521546	0
158.4	0.0183315	0.0790094	-0.0138701	0.0339302	-0.00936041	0.0342656	0.0210114	-0.0226322	0.00612009	0.011048	0
158.6	-0.00177108	0.0178173	-0.0432957	0.00967209	0.0182535	0.0206372	-0.00736725	-0.0434118	0.0275942	0.0232731	0
158.8	-0.035841	-0.0314789	-0.0291102	-0.0290829	0.00922376	0.0162789	0.0177383	0.00940041	0.0581986	0.00913969	0
159	-0.0082252	0.0334143	0.0439225	0.00196168	0.0143688	0.00487518	0.0321346	0.0116801	0.0178809	0.00291156	0
159.2	0.0207155	-0.0560037	0.0391862	-0.00584586	0.0351448	-0.0283172	-0.0161035	-0.00191321	0.022127	0.0433496	0
159.4	0.00865322	-0.0701169	0.00856466	-0.00286962	0.0346426	0.0174071	-0.0418963	0.00135537	-0.0313516	0.00031678	0
159.6	-0.0255108	-0.0397628	-0.00358875	-0.0372791	0.00387991	-0.00760225	-0.0188183	0.0120569	-0.00179275	-0.0336655	0
159.8	-0.0269173	-0.00160823	-0.00743712	0.0395643	-0.00925784	-0.0241474	0.00975856	-0.00712287	0.00963888	-0.0274501	0
160	-0.00692527	-0.0116003	-0.00677855	0.0548172	-0.0123306	0.0163258	0.0147087	-0.0071324	-0.0313763	0.0147078	0
160.2	-0.0072433	-0.0512874	-0.0254369	-0.0604344	-0.00678573	0.0194377	0.0209341	0.0163067	-0.0351892	0.0382363	0
160.4	-0.00864795	-0.0282346	-0.0648208	-0.0350494	0.0176643	-0.015386	0.0262106	-0.0162006	-0.0266412	-0.0190458	0
160.6	0.0105493	-0.0116792	-0.0259388	-0.0250948	-0.0175545	0.00148198	-0.0244169	-0.0369156	-0.0436054	-0.0465211	0
160.8	-0.0273977	0.00357575	0.0262075	-0.0452418	-0.0132061	-0.036736	-0.0143167	0.0255684	0.00787123	0.00799124	0
161	-0.00160093	0.040915	0.00899898	-0.0522511	0.00733769	-0.0333612	0.00475569	0.0349668	0.0104404	0.0300745	0
161.2	0.030714	0.00289514	0.0410863	-0.00586108	0.0183811	0.00570707	0.0140463	-0.0292065	-0.0285169	0.0181789	0
161.4	0.0126727	-0.0380275	0.020753	0.0430529	0.0102599	0.0131658	0.0390605	-0.040408	-0.0224474	0.0171434	0
161.6	0.002088	0.00969605	-0.0662618	0.0209613	-0.0171408	0.0280901	0.0184165	0.0193184	0.00327234	0.0171317	0
161.8	0.010046	0.0114879	0.0473398	-0.0165787	-0.0273373	0.075177	-0.0721218	0.0361418	-0.0149359	0.0105461	0
162	0.0313537	0.0193171	0.0058193	0.0218365	-0.0161088	0.0263232	-0.0310302	0.0436719	-0.0167398	0.00158091	0
162.2	-0.0194267	0.0259835	-0.015972	0.00304578	-0.0391986	-0.0021285	-0.00449305	-0.00220901	0.0125469	-0.00729699	0
162.4	-0.0200846	0.0433395	0.0349507	-0.0130296	-0.0214647	0.000207451	-0.0109476	-0.0420166	0.0415288	-0.00697512	0
162.6	0.0118169	0.00583904	0.00232532	0.0286031	0.00386119	0.00919705	-0.0176166	-0.0434765	0.0293511	-0.0020416	0
162.8	-0.000682953	-0.0281072	-0.042482	0.0413309	0.00150216	0.00683356	-0.00496353	0.00322234	-0.00326902	0.00408349	0
163	-0.0179224	0.0325722	0.020513	0.0088909	0.0165567	-0.0234258	0.0107131	0.040517	-0.00955035	-0.00128818	0
163.2	-0.0223424	0.0153821	-0.0254035	0.0338225	0.00587668	-0.0486348	-0.026404	-0.0298297	0.00280207	-0.029775	0
163.4	-0.01181	-0.051623	-0.0363141	-0.0369511	-0.0206939	-0.0468465	-0.00560463	0.0347331	0.0447823	-0.00393758	0
163.6	-0.00733794	0.00249033	0.0222962	-0.0309957	0.0345752	0.00229349	0.020894	0.0290645	0.0207103	-0.00475606	0
163.8	0.0100677	0.0384064	0.0445842	0.0202217	0.0129703	0.0259102	0.0479935	0.0161785	-0.00949165	-0.00556645	0
164	0.031693	0.0154431	0.00312131	0.0257647	-0.0306658	0.0175361	0.0574605	0.0260898	-0.0152773	-0.0124976	0
164.2	0.0328836	0.0107575	-0.0169486	-0.0100361	0.00868637	0.0154331	0.00135741	0.000704361	-0.0200836	-0.0285328	0
164.4	0.0186712	-0.0110268	-0.00263193	-0.0441296	0.000224495	-0.000623121	-0.0487945	0.00797265	-0.00490904	-0.00210758	0
164.6	-0.0130124	-0.0124324	-0.0485304	0.0042163	0.00528017	-0.0206965	0.0288893	0.000885834	-0.00313023	-0.0144134	0
164.8	-0.0312553	-0.0188119	-0.0319919	0.0469925	0.00774184	-0.0207185	0.0183003	-0.0527484	0.00693839	-0.0137935	0
165	-0.0105975	0.0217233	-0.000230482	0.0231462	-0.0150854	0.00420892	0.00141066	-0.0562227	0.0188523	-0.0318036	0
165.2	0.00132351	0.0288316	0.0537383	-0.0332821	-0.0106108	0.0190487	-0.00417281	-0.0262506	0.00986312	-0.0396764	0
165.4	-0.0130708	-0.0122958	0.0431492	-0.0520937	-0.00131629	0.00888407	-0.0260524	-0.00612298	-0.008304	-0.0139273	0
165.6	-0.0151284	-0.0190141	-0.0287915	-0.0236686	-0.0157004	0.00101223	-0.00125193	0.0155201	-0.0189097	0.000340865	0
165.8	0.00975517	-0.005478	0.0597355	0.00126004	0.0160876	0.0118153	0.0423472	0.0206325	-0.0255648	0.00790829	0
166	0.0547298	0.0375853	0.0633894	0.0302922	0.00812636	0.0237331	-0.035057	0.00698983	0.0053309	0.0757352	0
166.2	0.0287628	0.0252294	-0.0313928	0.0671868	0.00442509	0.0278805	0.0419076	0.00310907	0.0119611	0.0935958	0
166.4	0.00446845	-0.034265	-0.034423	0.0239793	0.00297625	0.00965816	-0.0114417	0.00944077	-0.0136027	0.0692696	0
166.6	-0.00909946	-0.0376714	0.011241	-0.0599044	-0.00101345	-0.00469458	-0.064195	0.0151664	-0.0254692	0.0217504	0
166.8	-0.0204435	0.00030534	0.00314558	-0.0454897	0.00783649	-0.0119798	0.00971081	0.00841812	0.00267051	-0.00749108	0
167	0.000288463	0.00821772	0.00301635	0.0248104	0.0166576	-0.017661	-0.0281218	0.00174811	0.0334007	0.0148473	0
167.2	-0.00424434	0.051484	0.018156	-0.0212304	0.0102892	0.0175315	0.0215791	0.0223298	0.00902667	-0.00291675	0
167.4	0.0289354	0.0193815	0.00683944	0.0210841	0.0315352	-0.00737262	0.0635806	0.00106783	-0.0243668	-0.0176482	0
167.6	0.0137905	0.0190066	-0.0203174	0.0376366	0.000713728	0.0314016	0.0302396	0.0101078	0.0107064	-0.0757196	0
167.8	0.00170148	-0.027951	0.0142177	-0.028671	-0.00141303	0.0129062	-0.0146397	-0.010844	0.0363786	-0.0617167	0
168	0.0136625	-0.0526115	0.00678317	-0.0271754	0.00781277	-0.0266811	-0.0202834	-0.0168206	0.0235938	-0.00170174	0
168.2	0.0105358	-0.00180273	-0.0588374	0.0298862	-0.0261906	0.0138792	0.00286299	0.0190268	0.0279192	-0.00621231	0
168.4	0.00442909	-0.0416934	-0.00812488	-0.00188705	-0.0170047	-0.010848	0.0226616	-0.0238517	0.0205581	-0.0137488	0
168.6	-0.0350521	-0.00820145	-0.0145615	0.064164	-0.0209307	-0.0439992	-0.0080626	-0.0126195	-0.0402508	-0.00972619	0
168.8	-0.00172788	0.0684029	-0.0398313	-0.0085506	-0.0420962	-0.00599774	-0.0283449	0.0191479	-0.0229506	0.0268715	0
169	0.0487768	0.0186064	0.0100422	0.0113147	-0.021384	-0.0295721	0.00559103	0.037315	-0.0265374	0.022512	0
169.2	-0.0056824	-0.0562766	0.0481715	0.0489215	0.0101042	-0.029336	-0.00461064	0.0156882	-0.0160439	0.0431169	0
169.4	-0.0523135	-0.0337431	0.0254294	-0.0252545	0.00509042	0.026708	-0.0344075	-0.0163824	-0.0100461	0.0562677	0
169.6	0.0028993	-0.0093365	-0.000848069	-0.0700742	-0.00799327	0.00726098	-0.0209317	-0.0388489	-0.0506201	-0.00732966	0
169.8	-0.0212344	-0.0318026	-0.0490407	-0.0433804	0.0112225	-0.0311371	-0.0639106	-0.0681801	0.00906602	0.0106544	0
170	0.00172087	0.0279265	-0.0836874	0.0338352	0.0454135	-0.0166548	-0.0090426	0.0278933	-0.00543044	0.0337916	0
170.2	-0.027168	0.0179525	-0.0324468	0.00107594	0.0195255	0.00104238	-0.0115489	0.0336843	0.00341315	-0.0306628	0
170.4	-0.0193962	0.0155523	0.0414209	-0.0388134	-0.00104526	-0.0114956	-0.0227796	-0.0601448	0.0357685	-0.0239067	0
170.6	0.00392074	0.0155784	0.0334256	-0.047552	0.00634267	0.00884481	0.00463683	-0.0403623	0.0142236	0.000380437	0
170.8	-0.00873877	-0.000730432	0.00326343	-0.0194704	0.0119829	0.0395268	0.0127612	0.0528776	-0.0149078	-0.0200092	0
171	0.0159517	0.0323978	0.0278456	0.0506627	0.01263	0.0041879	0.0152889	0.00496333	0.021513	0.0123165	0
171.2	0.0273831	-0.00317891	-0.0160469	-0.0182091	-0.0158687	0.00732496	0.0720553	-0.0389412	0.0308998	-0.0235833	0
171.4	0.0378972	0.000473	0.0182677	-0.00669301	-0.0173454	0.00516223	0.0903008	-0.0324601	0.0347004	-0.0210384	0
171.6	0.0134113	0.0397093	0.00976486	0.0268661	0.00658806	0.0250882	0.029175	-0.0255561	0.0192665	0.00207466	0
171.8	0.00865403	0.0422672	0.0104489	0.0390188	0.0089752	0.0202166	-0.00635145	0.0270018	0.0327103	-0.00898146	0
172	0.010168	0.00084603	-0.0041703	0.0298814	-0.00394696	-0.00488511	0.00361489	0.0478164	0.0120285	-0.00720568	0
172.2	-0.00245549	-0.0463439	-0.0440067	-0.000793626	-0.00693306	0.00260397	-0.0022924	0.000925027	-0.0570748	0.0126753	0
172.4	0.0331704	-0.0506139	0.0307094	0.00108507	-0.0121588	0.0176192	-0.00526187	0.0421801	-0.0277698	-0.0225629	0
172.6	0.0132179	0.04173	-0.0141319	0.048655	0.00653589	0.0274186	-0.00481769	0.058612	-0.0155994	-0.00494228	0
172.8	-0.019401	0.00780725	-0.00968975	0.0522406	0.0293919	-0.019809	-0.00792468	0.0435471	-0.01149	0.0155906	0
173	-0.0391346	-0.0320219	0.0308878	-0.0308394	-0.00416409	-0.0331669	-0.0586845	-0.0309723	-0.00683932	0.0153436	0
173.2	-0.0234766	-0.0286808	0.017094	-0.0447815	-0.0318777	-0.0172944	-0.0336937	-0.0446083	-0.00107709	-0.00573961	0
173.4	0.000817583	0.00175121	-0.010799	-0.0260946	-0.0116871	-0.0208838	0.0159554	0.00547567	0.00145442	-0.00474301	0
173.6	-0.00455019	0.0463063	0.00912631	-0.0579459	0.00128167	-0.00884122	-0.0280908	-0.0149918	-0.00442402	0.0286578	0
173.8	-0.00450401	0.00467369	0.0119639	0.0453097	0.0101947	0.0264311	0.0318832	-0.0384197	-0.00386201	0.00204822	0
174	-0.0246353	0.036129	-0.0200557	-0.0311294	0.0262208	0.0137347	0.0413579	-0.0367179	0.00572718	-0.0416128	0
174.2	0.0139693	-0.010369	-0.00698016	0.0296124	-0.0126651	0.0186641	0.00156964	0.000453778	0.00921307	-0.0385034	0
174.4	-0.0062995	0.00456579	-0.00975937	0.0477887	-0.0180079	0.0191891	-0.0295791	0.00469133	0.0276863	-0.00976579	0
174.6	-0.013022	0.0378746	-0.0525788	-0.0156786	0.011238	0.0077836	-0.0437717	-0.00335169	0.0200704	0.00713936	0
174.8	0.0343903	-0.0364168	-0.0279207	-0.0135025	0.00628299	-0.0248185	-0.0032691	0.0374695	-0.0151716	0.00874808	0
175	-0.0145832	-0.0685859	0.0481707	-0.0178155	0.000165082	-0.0780935	0.0653935	0.0682447	-0.00645335	0.0105076	0
175.2	-0.00146786	-0.0343986	-0.0285494	0.0296807	0.00776623	-0.0285137	-0.034191	0.0144859	-0.0111527	0.0215303	0
175.4	0.0141303	-0.0352577	-0.0336444	-0.0057875	-0.0117822	-0.0190387	-0.0869632	-0.023021	-0.0446033	0.0130844	0
175.6	-0.000529031	-0.0023556	0.0194299	-0.0104437	-0.0143333	-0.0119533	-0.0346712	-0.00880414	-0.0404343	0.0171708	0
175.8	-0.00617757	0.000452124	0.0206756	-0.01337	0.00881191	-0.00810672	-0.0274835	-0.0149745	0.00855747	-0.00187973	0
176	-0.000607105	-0.0367808	0.0104588	-0.0387911	-0.00451399	-0.0108973	-0.0231775	-0.0403425	0.00831995	0.012264	0
176.2	-0.00777593	-0.02132	0.0394997	-0.02335	-0.0421494	-0.0127806	0.065399	-0.0197068	-0.0240536	0.0644338	0
176.4	-0.0234039	0.0101759	0.00287032	-0.00158977	-0.0197514	-0.036972	0.0668736	0.0143879	0.024017	0.000426061	0
176.6	-0.0596384	0.0116345	-0.0818093	0.0192814	-0.0172444	0.0085239	-0.00383832	-0.00406791	-0.0122412	-0.0205452	0
176.8	-0.0016728	0.0237558	0.0301723	0.00836704	-0.00233615	-0.00110448	-0.000634347	-0.0303397	-0.00265109	0.00116368	0
177	0.0282028	-0.00769027	0.0217066	-0.0429652	0.0197698	0.0214735	0.0019798	-0.0223231	0.0189156	-0.00415717	0
177.2	0.00590227	-0.020645	-0.0409769	-0.0128921	0.0213219	0.0337626	0.0439885	0.00881763	0.0342298	-0.0359533	0
177.4	0.00578914	0.0158357	0.0211233	0.0579893	0.0114573	0.0184418	0.0784097	0.0315124	0.0390416	-0.0350153	0
177.6	0.00266639	0.0285011	0.0340179	0.0440286	0.0215869	0.0517326	-0.0151444	0.0104546	0.0154072	-0.0119202	0
177.8	-0.0164089	0.0617286	0.0103699	0.0679847	0.0473122	0.00910756	-0.0415577	-0.034097	0.0305657	-0.0314008	0
178	0.0412709	0.0816602	0.0364569	-0.0131189	0.0402202	-0.0115777	-0.033538	0.0494598	-0.00788589	0.0222467	0
178.2	0.0309494	-0.0109389	0.0392916	-0.0361823	0.0146031	0.0490832	0.0214745	-0.0169248	-0.00513932	0.0199499	0
178.4	0.00105705	-0.0430907	0.0136808	0.00975805	-0.00757193	0.0517849	-8.40896e-05	-0.0620054	0.0174625	-0.0113537	0
178.6	-0.0154129	-0.014858	-0.0108496	0.0176949	-0.00483201	-0.0241627	-0.0154735	0.0595348	-0.00305421	-0.00523374	0
178.8	-0.0205862	-0.0367813	-0.023676	-0.0206723	9.21567e-05	-0.0497625	0.0237997	0.110149	-0.0349687	0.0227922	0
179	0.0310607	-0.0133444	-0.0160047	-0.0410769	-0.0246916	0.0058068	-0.0280206	0.000703956	-0.0257043	0.0349343	0
179.2	0.00925797	0.0375729	-0.00485904	-0.0365063	-0.0124387	0.0559346	0.013409	0.0346976	-0.00563826	-0.00514402	0
179.4	-0.03156	-0.00403568	0.0157205	-0.0385467	-0.00533878	0.0167274	-0.00740654	0.0426173	-0.029015	0.0363217	0
179.6	7.38379e-05	-0.0239019	-0.00504383	-0.0547864	-0.0169012	-0.0397311	0.0334278	-0.0465123	-0.0245765	0.0133507	0
179.8	0.00737478	0.00543057	0.00364241	-0.00158355	-0.0235884	-0.0342242	0.039183	-0.0509436	-0.0239203	-0.011385	0
180	0.000732555	0.0403937	0.00634331	0.0826117	-0.00480865	0.0171596	-0.00345472	0.028533	-0.0279274	0.00334095	0
180.2	0.0361452	0.0550839	-0.054325	0.0594671	0.012107	0.0214768	0.00589708	0.0231213	0.0161896	-0.0161396	0
180.4	-0.0156167	0.0181482	-0.0313875	-0.0287838	-0.00784145	-0.030948	-0.0542871	-0.0209985	0.0351871	-0.00134361	0
180.6	-0.0230166	0.00955278	0.0015995	-0.027287	-0.000634241	0.032072	-0.0274866	-0.031175	0.00256384	-0.0344085	0
180.8	0.00649543	-0.00654329	0.030349	0.0500675	-0.018152	-0.00465915	-0.00888176	0.0128319	0.0236139	-0.0481832	0
181	-0.00409846	-0.023866	-0.0294629	0.0445322	-0.00694759	-0.0245086	-0.00961281	-0.00347343	0.0252337	-0.0110852	0
181.2	-0.00482694	-0.0269067	-0.0112029	-0.00673017	0.00791061	-0.000423773	-0.00568213	-0.051939	0.0141407	0.0249064	0
181.4	0.0111878	-0.0142731	0.0819807	-0.00393018	-0.00621822	0.00465506	0.000263433	-0.0391216	0.00980145	0.0248907	0
181.6	-0.0195955	-0.0116606	0.0139209	0.0210343	0.000132018	0.013247	0.0204392	0.00829579	-0.0196067	-0.00116053	0
181.8	-0.00283417	-0.0565934	-0.0289119	0.0443479	-0.00277038	-0.0398991	0.0376828	0.0308429	0.0209431	-0.0374976	0
182	0.0238726	-0.0258744	-0.0233402	0.000671748	-0.00731414	0.00676365	-0.0139487	-0.0227548	0.0228812	-0.0039128	0
182.2	0.0454441	0.0332484	0.0370019	-0.0275643	0.00993626	-0.0112126	0.0323702	-0.0151202	-0.00335673	0.00822831	0
182.4	0.0227002	0.041838	0.0438404	-0.0290026	0.0213369	0.00253207	0.0671977	-0.00168652	-0.00202194	0.0053889	0
182.6	-0.0152757	0.0444935	0.00315281	0.0043926	0.0132677	0.0185965	0.0171366	-0.0199269	0.0162654	-0.0183603	0
182.8	-0.00402065	0.0494936	-0.000355753	0.040811	0.0167817	-0.0354009	-0.0130239	0.000393235	0.00449336	-0.0274244	0
183	0.0129362	-0.000491056	-0.00202244	-0.0053515	0.0281699	0.00789882	-0.0136424	0.0424643	-0.0158544	0.0573374	0
183.2	-0.0316259	0.0253082	-0.0132867	-0.0233092	-0.00792776	0.00447887	-0.0276834	0.0524956	0.0188938	0.0469311	0
183.4	-0.00401622	0.0120356	-0.0224735	0.016334	-0.00985733	-0.0135848	-0.0417896	0.0367022	-0.0206675	0.0493483	0
183.6	0.0318604	0.0199719	0.0599173	0.0245573	0.0163663	-0.0367036	-0.0283756	0.053437	-0.0660617	0.0766752	0
183.8	0.0377866	-0.0177937	0.111584	-0.00041118	0.00876136	-0.0246003	-0.00343265	0.0729807	-0.0294813	0.10311	0
184	0.0396313	-0.0549121	0.0565633	0.00261569	-0.0133965	0.0359096	-0.00708977	0.0493477	0.0263147	0.0972701	0
184.2	0.0327393	0.0137948	0.0365781	0.0164924	0.0153465	0.0787465	-0.0212579	0.0299565	0.02749	0.0601005	0
184.4	0.0277149	0.000986217	0.0812559	0.00185557	0.058949	0.058757	0.0034287	0.0556889	0.0249871	0.06223	0
184.6	0.0502322	-0.0153747	0.0366679	0.0547492	0.0405264	0.0072268	-0.0128466	0.0281353	0.0245947	0.065304	0
184.8	0.001978	-0.00805101	0.0456209	0.0605312	0.049293	-0.00963844	-0.0234174	0.0126184	0.0566916	0.0849054	0
185	-0.00118169	-0.0107071	0.0131177	-0.014005	0.0280788	0.0149591	0.037297	-0.00190522	0.0438797	0.0907351	0
185.2	0.0444581	-0.00943811	0.0167701	0.0103527	-0.0055429	0.0197331	0.0717597	-0.00113868	0.0147686	0.060282	0
185.4	0.00725653	0.00183547	0.0455112	0.0995618	0.00253508	-0.00582141	0.0287704	0.0344608	0.0236554	0.0510367	0
185.6	-0.0425204	0.00248861	-0.0466402	0.0323936	0.00565547	-0.00518332	0.026514	0.0477331	0.0190543	0.0855594	0
185.8	0.0508478	0.0308235	0.0590721	-0.00894743	0.017131	0.00801263	0.0685854	0.0367685	0.0228936	0.0630916	0
186	0.00118835	0.037026	0.0845797	0.0286954	0.0267874	0.0184105	0.0790437	0.0708572	0.0662853	0.0667454	1
186.2	0.0510317	0.105442	0.111035	0.084986	0.0625293	0.0929817	0.11175	0.107077	0.0934792	0.0964467	1
186.4	0.137088	0.170851	0.158555	0.0979658	0.0918667	0.105478	0.116517	0.148471	0.129212	0.0861759	1
186.6	0.126311	0.134515	0.139557	0.0921259	0.0838646	0.04266	0.0814461	0.16884	0.141452	0.0872284	1
186.8	0.107495	0.0745424	0.076972	0.111282	0.0774736	0.026332	0.131596	0.138916	0.0956374	0.133788	1
187	0.10743	0.0982389	0.061578	0.122203	0.0875933	0.0336007	0.236647	0.102116	0.0906723	0.124168	1
187.2	0.105422	0.110065	0.0842389	0.09717	0.0371629	0.0508015	0.11729	0.0509022	0.111624	0.108262	1
187.4	0.0899823	0.149146	0.0610112	0.0775721	0.028554	0.0257903	0.0641004	0.143707	0.101832	0.0629548	1
187.6	0.0750744	0.095556	0.0501834	0.080143	0.0478542	-0.00256941	0.0816356	0.0948676	0.0908083	0.0493664	1
187.8	0.0806477	0.00400368	0.0508468	0.0789328	0.0237405	0.0200673	0.0880973	0.0625691	0.0726662	0.0529221	1
188	0.0912558	0.0520331	0.0226321	0.058881	0.00885232	0.0343551	0.0720941	0.12952	0.0503427	0.0396626	1
188.2	0.0813255	0.1491	0.0255202	0.05089	0.039353	-0.00986239	0.0577985	0.0819401	0.0463601	0.0417051	1
188.4	0.0724372	0.0652534	0.0930461	0.0724191	0.000589553	-0.00525936	0.0934165	0.135605	0.0214903	0.0482306	1
188.6	0.0764306	0.063253	0.0560385	0.0527065	0.0136413	0.0276277	0.070899	0.106369	0.0149113	0.0183113	1
188.8	0.0641854	0.0658657	0.0651668	0.0455809	-0.00431778	0.0227838	0.0611845	0.020429	0.00508682	0.00671259	1
189	0.049079	0.0483573	0.0589801	0.0716739	0.00740759	-0.00072876	0.0448238	0.0600409	0.00495402	0.0184792	0
189.2	0.0421845	0.0237579	0.03857	0.0638249	0.00249335	-0.00266012	0.018339	0.070221	0.0396707	0.016834	0
189.4	0.0373423	-0.00142072	0.0519662	0.0217445	-0.0301123	0.0049247	0.029117	0.00217107	0.0528957	0.0123681	0
189.6	0.0352439	-0.00322299	0.00141579	0.0234121	0.0212634	-0.000295819	0.0649953	0.0849197	-0.00760129	0.0208318	0
189.8	0.0211927	-0.0251983	-0.0387849	0.0268377	-0.0241492	-0.00591017	0.073289	0.0587475	-0.0310344	-0.0140949	0
190	-0.0102002	0.00554252	0.0673429	0.0192466	-0.0436887	-0.056358	-0.00376046	0.0119702	-0.0108332	-0.0112756	0
190.2	0.0153274	0.0182222	0.064509	-0.00300086	-0.0389612	-0.0562473	0.0430255	0.0438564	-0.0229981	0.037072	0
190.4	0.0197758	0.000728042	0.0464617	-0.0168632	-0.00905131	-0.0358159	0.0687393	0.0668455	-0.00491037	0.0282256	0
190.6	0.0171913	-0.0130421	0.0777103	0.0211664	-0.00780691	-0.0130722	0.0256178	0.0166223	0.0291869	-0.00737827	0
190.8	0.0413589	-0.0182041	0.0243336	0.0582034	-0.041949	0.0236452	0.0499775	-0.0101264	0.00104276	0.00151557	0
191	-0.0213044	-0.00850091	-0.011962	-0.0105646	-0.00626829	0.00053611	0.0380159	0.0374762	-0.00852543	-0.0257493	0
191.2	0.0134563	4.46791e-05	0.00606705	-0.0509567	-0.0522646	0.0113784	0.0590763	0.0122498	0.00895048	-0.0290094	0
191.4	0.00832817	-0.00439327	-0.0193202	-0.0343979	-0.0325252	0.0429173	0.0156062	0.0517529	-0.00113186	-0.0115753	0
191.6	0.00613034	-0.0386768	-0.0142711	-0.00111876	-0.0408604	0.0193612	0.0363078	0.0193041	-0.0216111	-0.0217517	0
191.8	0.0104119	-0.013855	-0.00762858	0.0015419	-0.0145242	-0.0301534	0.0412726	-0.0161218	-0.0174064	-0.0345183	0
192	-0.0250199	0.00403363	-0.0274032	-0.00702141	0.0359578	-0.030809	0.0018881	-0.0170026	0.0117435	-0.012114	0
192.2	-0.0377175	-0.0620906	-0.0125299	-0.00208168	-0.0299241	-0.000571362	0.025601	-0.0900414	0.0186663	0.00402583	0
192.4	0.0085553	0.021475	-0.0254726	-0.0352325	-0.0108033	-0.00431505	-0.046455	-0.0303475	-0.016177	-0.0184772	0
192.6	0.0270435	-0.00859911	-0.00262079	-0.0196754	-0.00898575	-0.00864225	0.0289598	0.0223789	0.0495978	0.00416331	0
192.8	-0.000743591	-0.00645114	0.0273539	0.0292897	-0.0149995	0.00418075	0.0087952	0.0492853	0.00856018	0.0166941	0
193	-0.0236998	-0.0242621	-0.0182912	-0.0456751	-0.0247626	0.013295	-0.047035	0.0549693	-0.00499387	0.000817678	0
193.2	-0.00371884	-0.033223	-0.0227307	-0.0596337	-0.0144038	0.019866	-0.0162431	0.0243247	0.00398898	-0.00794695	0
193.4	0.0254859	0.0245361	0.0364492	0.0591363	0.0197701	0.0173098	0.00862635	-0.00805362	-0.0509175	-0.0142341	0
193.6	0.00887302	2.01875e-06	-0.0157086	0.0155742	0.0194839	-0.0114943	-0.0126184	-0.0073223	-0.009074	-0.0218685	0
193.8	-0.0213042	-0.00646727	0.00592333	0.0348886	0.00967567	-0.00633246	0.0012023	-0.029983	-0.00511664	0.0331538	0
194	-0.017486	0.0267295	0.0468347	-0.0149483	0.00377794	0.00521117	-0.00737555	0.000317837	-0.0416004	0.0229127	0
194.2	-0.00224119	0.0483046	0.00562734	0.0119304	0.0320752	0.00884804	-0.00333602	-0.0180521	-0.0525441	0.00211562	0
194.4	0.00348435	-0.0126897	-0.0339106	0.0304857	0.0437506	-0.00829213	0.0064038	-0.0473748	-0.0182068	-0.0105411	0
194.6	-0.0214051	-0.0391621	0.00974089	-0.0189706	0.0104745	-0.00150591	0.0051377	0.00304091	0.0198861	-0.0219788	0
194.8	-0.0492373	0.0267375	0.0358212	-0.0252186	-0.0162038	0.019211	0.00557301	0.053415	0.0173628	-0.00524561	0
195	-0.012883	-0.0265077	-0.041998	-0.0546622	-0.0186796	-0.0476529	-0.0102518	-0.00343369	0.00610506	-0.000247902	0
195.2	-0.0159451	-0.0347672	-0.0577422	-0.0595941	-0.0226928	-0.0422739	-0.0252796	-0.0595515	0.0629131	-0.0406446	0
195.4	-0.00554235	-0.0110262	-0.016567	-0.0106237	-0.00412094	-0.0123241	-0.0575403	-0.0036323	0.0129124	-0.0215407	0
195.6	0.018369	-0.0158054	-0.0131175	0.0176742	0.0163745	-0.0157514	-0.0344938	0.0153214	-0.0463663	-0.00650858	0
195.8	0.0181089	0.00667242	-0.000179159	0.00870972	-0.0161476	-0.0139	0.0114781	-0.0427226	-0.00281136	-0.00063063	0
196	-0.00693222	0.0219362	0.0258318	0.014443	-0.0429215	0.0178004	0.0186388	-0.0444181	0.024964	0.0319254	0
196.2	-0.0172323	-0.0315079	-0.0135771	0.030497	0.0134853	0.0320297	0.0143681	0.00911125	-0.0416952	0.028677	0
196.4	0.0129687	0.0179262	-0.0156534	0.0123709	0.0274037	0.0137133	-0.00428609	-0.0143671	-0.0317987	-0.00829721	0
196.6	0.0127978	-0.0141091	-0.0419007	0.017337	0.00743834	0.0029318	0.022109	0.0225112	-0.00847805	0.0165872	0
196.8	0.0148129	0.00723673	-0.00835846	0.0198374	-0.0350883	0.016551	0.0319002	-0.0188901	0.0211126	0.0116347	0
197	-0.00916155	0.0227284	-0.00437437	0.00468122	-0.0454346	0.00877844	-0.0275575	-0.00439	0.0168511	0.0275802	0
197.2	-0.0122819	-0.0138491	-0.0217028	0.00993809	0.00937165	-0.019507	-0.0510981	0.0552589	-0.00229272	0.0442489	0
197.4	0.0242409	-0.0239201	0.014765	0.00483434	0.0545289	-0.0314381	0.0125851	0.0194185	-0.00348365	-0.00209877	0
197.6	-0.00451727	-0.0214366	0.0229883	-0.0620414	0.0196719	-0.0278049	0.0254066	0.0153968	-0.0078596	-0.0241602	0
197.8	0.00560454	0.010046	0.0509386	-0.0421057	0.00655837	0.0108433	0.00678847	0.0198269	0.0455731	-0.0507537	0
198	0.00328985	0.00790544	-0.00652512	-0.0217431	-0.00158749	0.0425428	0.0390494	0.0148196	-0.0238858	-0.0261211	0
198.2	-0.0205183	-0.00949694	-0.00800404	-0.000635131	0.00659154	-0.0101868	0.00421336	-0.0289973	-0.0210659	-0.00638738	0
198.4	-0.00893746	-0.0281036	0.0251017	0.0377396	-0.00597781	-0.0422737	-0.0323112	-0.034832	0.0313468	-0.0130146	0
198.6	0.0250439	-0.0151207	-0.0132416	0.0338491	-0.00830023	-0.00218933	-0.0251799	0.00333356	0.0102514	-0.0227142	0
198.8	0.00705382	0.0262718	-0.0359578	-0.016274	0.026432	0.011293	-0.0438649	-0.00579438	-0.0067706	-0.0142718	0
199	-0.0387142	0.00233289	0.0320143	-0.0241619	-0.0214824	-0.000799499	-0.0135095	-0.0244755	0.00599154	0.0289882	0
199.2	-0.0154859	0.00793807	0.00673955	-0.0615931	-0.033174	-0.026315	-0.0181536	-0.0112924	-0.00222522	0.0253125	0
199.4	0.0158111	0.0228884	-0.0159314	0.0237149	-0.033666	-0.013546	0.00163923	0.000973372	-0.0171362	0.026837	0
199.6	0.0222925	-0.012248	0.014342	0.0239739	-0.0159855	0.0313518	-0.00254004	0.0251808	-0.0224929	-0.00103476	0
199.8	-0.000360409	-0.00291314	0.0445851	-0.0404545	0.01383	0.00945119	-0.00971813	0.0170167	-0.0115592	-0.0229112	0
200	-0.00205595	0.0456259	0.0273436	-0.00382057	0.0162172	-0.0331743	0.0272712	-0.0115759	0.0150299	0.00729369	0
200.2	0.0386581	0.0146828	-0.0190996	0.0221949	-0.00718497	0.0330203	0.0365986	0.0117493	0.0317653	0.0212098	0
200.4	-0.00500844	0.0484233	-0.0250587	0.0224156	-0.0167866	0.0400029	0.0013002	-0.00954281	0.0116858	0.00532409	0
200.6	0.0106821	-0.00812314	0.000944018	0.0463691	0.0141485	-0.0115289	-0.0270514	0.0186845	0.000505422	-0.0338895	0
200.8	0.016549	-0.0173133	-0.0418211	0.0280223	-0.00895302	0.00218869	-0.016165	-0.00162369	-0.00741351	-0.0335907	0
201	-0.00415848	0.0290757	-0.00799559	0.045684	-0.0208851	0.00343654	0.0227287	-0.00913211	-0.00961156	0.000729993	0
201.2	-0.00520135	0.00351413	0.0542012	0.0794286	0.00476709	-0.0117911	0.033478	0.00953434	0.0116195	0.00971047	0
201.4	0.00513874	-0.0265437	0.00529794	0.00930602	-0.0111909	0.00863208	0.00215404	-0.00999587	0.0186472	-0.00269067	0
201.6	-0.0046768	0.0505353	0.00921365	-0.0676503	-0.0275231	-0.03398	-0.0152964	0.00446766	-0.0265188	0.0126535	0
201.8	-0.0323653	-0.0318886	-0.0131435	-0.0298471	0.0195525	-0.0319321	-0.0237794	-0.00200741	-0.0137506	0.00839992	0
202	0.00530904	-0.0699327	-0.0349539	-0.0279791	0.00889463	0.0118903	0.0332369	-0.0261031	0.0137441	0.0224145	0
202.2	-0.0204807	-0.0146484	0.00731457	-0.0262363	-0.00182136	-0.0270105	0.00661157	0.000567747	0.0076702	-0.00171526	0
202.4	-0.040584	0.0183283	-0.00560878	-0.0289945	0.0058536	-0.00498886	-0.0239381	0.0107793	-0.0173221	-0.00997207	0
202.6	0.0164296	-0.0263025	-0.0678048	0.0103569	0.0163468	0.0790929	0.0012312	-0.0156998	-0.0393001	0.0222684	0
202.8	0.0326943	-0.0562234	-0.016668	0.0864246	0.0353991	0.0301512	-0.0298504	-0.00507472	-0.0176568	0.00229501	0
203	0.0200967	0.0204708	0.0416274	-0.0445276	0.0034967	0.0152739	-0.0278297	-0.00860764	0.0686043	-0.0327811	0
203.2	-0.00318701	0.0239284	0.0161517	-0.0467922	0.0024706	0.021375	-0.0274672	0.0256124	0.0111012	-0.0127432	0
203.4	0.00643159	0.00648509	0.00977788	0.0394069	0.0123663	0.00623785	0.0528433	0.00203742	-0.0117534	0.00716539	0
203.6	-0.00318475	-0.0179717	-0.00746669	0.0316369	0.0216014	-0.040852	0.0792871	-0.025139	-0.0114188	-0.0224184	0
203.8	-0.00742252	-0.00203907	0.00838089	-0.0372046	0.0108209	-0.0290961	0.00232084	-0.00548623	-0.0298364	-0.0175615	0
204	0.0193247	0.0562035	0.0334989	-0.034454	-0.0206666	0.0121108	-0.0123428	0.0161954	-0.0180502	0.0400106	0
204.2	0.00608457	0.0352557	-0.0320368	0.0128544	-0.0279339	-0.0401015	0.0547588	0.0116414	0.00403976	0.0229392	0
204.4	-0.0062105	-0.0199857	0.0666861	0.00457244	-0.0187944	-0.0165155	-0.011097	-0.0145912	0.00365564	-0.023585	0
204.6	-0.0437783	-0.0222949	0.0668924	0.00514113	-0.00128751	-0.0282587	-0.0258364	0.00216249	-0.0360232	-0.00130536	0
204.8	0.00517882	-0.00220543	-0.0315539	-0.0201701	0.00954567	-0.00868007	-0.0231478	-0.033316	-0.0187051	0.0456994	0
205	0.00896007	0.00553364	-0.0473272	-0.0449892	-0.000272319	0.00584009	-0.0173595	-0.0133004	0.00993201	0.0395393	0
205.2	-0.0263434	-0.00116044	0.0112455	-0.00219897	-0.00983115	-0.00064035	-0.0312056	0.0385927	-0.010092	0.00226896	0
205.4	0.0078293	-0.00323194	0.0273509	0.0528011	0.00312437	0.012654	-0.0638283	-0.012742	-0.0133759	-0.00812419	0
205.6	-0.0336327	0.00572126	0.0265107	0.0172537	0.0151983	-0.0231965	-0.0128724	-0.0193635	0.0201546	-0.0034202	0
205.8	0.0137994	-0.0332802	0.00233737	-0.00620202	0.0197045	-0.0306188	-0.0354691	0.000541711	-0.0172978	0.0146335	0
206	0.00190989	-0.00416522	-0.0129916	-0.0121511	0.0196715	0.00126543	-0.0789239	-0.0349273	-0.0388811	0.00459348	0
206.2	-0.0290061	-0.000530724	-0.0259526	-0.000175924	-0.0240949	0.00781048	-0.0280426	-0.0121834	-0.0152499	0.0113365	0
206.4	-0.021392	-0.0304323	-0.0285755	-0.00871473	-0.0155754	-0.0178163	-0.0132966	0.0245129	0.0182639	0.0179129	0
206.6	0.00636803	-0.0457222	-0.0146225	-0.0241931	0.0285131	-0.0100803	-0.0164578	-0.00804666	0.0446362	0.00296856	0
206.8	0.0390995	-0.054852	-0.00520895	-0.0103846	-0.0154369	0.0320331	0.0971553	-0.0143283	0.0341014	-0.00729998	0
207	0.0338553	0.00809904	0.00221043	-0.030862	0.000856478	0.0141698	0.049957	0.0236062	-0.0382301	-0.0451255	0
207.2	0.019129	0.00618633	0.00395035	0.0311322	0.0133837	-0.00130205	0.00407081	0.0140956	-0.00215968	-0.0358483	0
207.4	-0.000720346	0.0176164	-0.017423	-0.0307729	-0.00154762	0.0389461	0.0443221	2.01156e-05	0.0118786	-0.0138828	0
207.6	-0.00263048	0.0668684	-0.0291049	-0.00893262	-0.00766679	0.0367764	0.0516263	0.0323824	0.0271831	-0.0171165	0
207.8	0.0226293	0.0746465	-0.00511694	0.110778	-0.0146765	0.0111809	0.00148214	0.0435186	0.0623094	-0.024713	0
208	0.0253595	0.0221268	0.0253602	0.0767555	-0.0257398	0.0247528	-0.00137317	0.00928315	0.0270769	-0.0171388	0
208.2	-0.0135421	0.00101601	0.0121452	-0.00326428	-0.000256542	-1.95692e-05	0.0233721	0.0167361	-0.0295772	-0.0147298	0
208.4	0.00185758	0.0462481	-0.0412416	0.0307788	0.00817748	-0.0173144	-0.0344418	0.00663312	0.0207445	-0.0123511	0
208.6	-0.00421968	0.0125573	-0.0153795	-0.00462858	-0.00138021	-0.00684874	0.00685542	-0.0171824	-0.00913653	0.0278473	0
208.8	-0.0196505	0.0328704	0.0274377	-0.0443519	0.00367295	-0.0161517	0.00895571	-0.00562624	-0.0228391	0.0132984	0
209	-0.00107599	-0.0118942	0.0323219	-0.0102098	0.0105498	-0.0117606	-0.0328757	0.012073	0.0127129	0.000436635	0
209.2	0.00515534	-0.0931825	0.0223319	0.0260764	0.00589262	0.00476241	-0.00562965	-0.0155706	0.0267636	0.0036401	0
209.4	-0.01445	-0.0321413	0.0264532	0.02227	-0.00396243	-0.00919135	0.0357155	-0.0475652	0.00718142	-0.0290527	0
209.6	0.0200149	-0.033697	0.034921	0.0390465	-0.0194155	0.00367656	0.0111214	-0.0140891	-0.0287052	0.00076347	0
209.8	-0.0129183	0.0137062	-0.00447056	0.011629	0.00339405	0.015992	0.0326082	0.0112737	-0.017789	0.00357907	0
210	-0.0149549	0.0458319	0.0179771	-0.0344812	0.00254196	-0.0156331	0.0111767	0.0159336	0.0215922	0.0208939	0
210.2	0.0173487	0.0252949	-0.043656	-0.0377724	0.0170092	-0.00770076	-0.00509656	0.0047629	0.0194534	0.0329897	0
210.4	0.0167602	0.0163283	-0.0601832	-0.051321	0.00490242	0.00190068	0.0074352	-0.00564771	-0.00352895	0.0257342	0
210.6	-0.00753394	0.0307958	0.0305653	-0.0661089	-0.0303157	-0.0146876	-0.0044232	0.00668621	-0.00797578	0.0056621	0
210.8	-0.008658	0.0183524	-0.0016362	0.0120011	0.00859478	0.0180711	-0.012739	0.0184286	-0.0143167	-0.0233069	0
211	-0.00588463	0.0110904	0.0259405	0.064381	0.00906614	0.00374881	0.0343711	-0.00987374	-1.92396e-05	-0.00878599	0
211.2	0.00898947	-0.0328515	0.0356428	0.0412188	-0.0132533	-0.0189702	0.0272762	0.0170101	0.0277902	0.00488261	0
211.4	-0.00141396	-0.0446808	0.0292509	-0.00342104	-0.00292161	0.025404	-0.00342772	-0.0301028	-0.00634755	-0.017246	0
211.6	-0.00766598	-0.0005965	-0.0206071	-0.00487751	0.00680943	-0.00379172	-0.0275844	-0.0319968	0.01284	-0.0171743	0
211.8	0.0213096	-0.00990579	-0.0418771	-0.00396715	-0.0196023	-0.0558871	-0.00181122	0.0220641	0.0564753	0.0133942	0
212	0.0347731	-0.0338813	-0.0120762	-0.0335807	-0.0192954	0.00500146	0.0305915	0.0200904	-0.0144564	0.016541	0
212.2	-0.0132662	0.0594339	-0.045367	-0.0230513	0.0401076	0.018737	-0.0432583	0.0559039	-0.0752206	0.0131701	0
212.4	-0.0465881	-0.0297115	0.0264673	-0.00421244	0.0172776	-0.0223712	-0.0403038	0.0461124	-0.00741576	0.057646	0
212.6	-0.0251201	-0.0539088	0.00489418	-0.00448272	0.0284222	0.013409	0.0208112	-0.0500297	0.0088435	0.0296625	0
212.8	-0.0286446	-0.000188909	-0.013962	-0.0315411	-0.00139131	0.0414036	-0.0518164	-0.0492348	-0.0241439	0.00869896	0
213	-0.0209544	0.05542	0.0351793	-0.0361265	-0.023302	0.0117454	-0.0551744	0.00596232	-0.0140319	-0.0101254	0
213.2	0.0164336	0.061711	0.040959	-0.00926814	-0.00470891	-0.0269996	0.0290874	0.0240135	0.0156685	-0.0409159	0
213.4	0.00452174	-0.000800078	-0.028726	0.00894834	-0.0264225	-0.0266462	-0.0111212	0.0290816	0.00288784	-0.032421	0
213.6	-0.017648	-0.0313532	-0.0500709	0.0354416	-0.0148024	0.0162185	0.0477568	-0.0377004	-0.00317221	-0.0388489	0
213.8	0.00738829	-0.0174301	0.00832683	0.0497534	-0.000648611	-0.0204536	-0.0111471	-0.0336518	0.00897553	0.00567276	0
214	0.0156441	-0.0057622	0.0549933	0.0179561	0.0229682	-0.00440054	-0.0402498	0.0183613	0.0122251	0.0367739	0
214.2	0.00410752	-0.0279932	0.0217139	-0.0350188	0.0225029	0.0355509	-0.00793744	0.0548304	0.0153153	0.00626407	0
214.4	-0.00532445	-0.0257751	-0.040958	-0.0059491	0.00749206	0.0154455	0.0234934	0.0574602	0.0101206	-0.0141982	0
214.6	-0.000194227	-6.03234e-05	-0.048837	0.0473416	-0.00673634	-0.0131111	0.0229298	0.0244717	-0.0131048	0.0130156	0
214.8	0.0179437	-0.0191796	-0.00868822	-0.0101933	-0.0256384	0.0113001	0.00222249	-0.0192997	-0.0148139	0.01853	0
215	0.00497891	0.0157735	0.00639067	0.00814694	0.0164221	0.0168656	0.0414271	-0.0132762	0.0143797	0.00571604	0
215.2	0.0198441	0.0561657	-0.0190795	0.0140056	0.00936706	0.0259062	0.0265882	-0.0367728	-0.0179006	-0.0124645	0
215.4	0.0116127	0.0241465	0.0367876	0.00465268	-0.0519823	0.0216043	0.00807657	-0.0250485	-0.0116826	-0.012026	0
215.6	0.0062463	0.0278068	0.044009	0.0264361	-0.0347998	0.0194583	0.0142893	0.0200273	0.0469584	-0.0242085	0
215.8	0.0211345	0.0349365	-0.030628	0.0390301	0.0264254	0.00412121	0.0397919	0.00465565	0.0461012	-0.0268973	0
216	0.0126264	0.00198047	-0.0143743	0.0156637	0.0119802	-0.0162715	0.0616455	-0.0371562	-0.0115854	-0.00681287	0
216.2	-0.00498029	0.073452	0.0582625	0.0170461	-8.61723e-05	0.0221258	0.0144089	0.00539795	-0.000335504	-0.0393675	0
216.4	-0.00791025	-0.00590525	0.0377139	-0.0121419	0.00894292	-0.00184424	-0.0424907	-0.02551	0.0150814	-0.0363338	0
216.6	0.00576853	-0.0116466	0.0160351	-0.0176232	-0.0156205	-0.0160988	0.000467226	-0.0378371	0.0307355	-0.00256758	0
216.8	0.000648987	-0.0401275	0.00729757	0.0258968	-0.00940707	-0.024199	0.043323	-0.0158375	0.0157135	0.00582655	0
217	-0.00299687	-0.0531261	-0.0199132	0.0255449	0.0327447	-0.0234031	0.0180172	0.00733475	-0.00109487	0.0375778	0
217.2	0.00938903	-0.017213	-0.0470682	-0.0364464	0.0410557	-0.00912265	-0.000750443	0.0105391	-0.00168789	0.0547897	0
217.4	0.00315884	-0.0469577	-0.0387781	-0.0526446	0.01276	-0.00715571	0.00280508	0.0083425	-0.0199304	-0.0139743	0
217.6	-0.00914889	-0.00386916	-0.00402198	-0.0249291	0.00110692	-0.00393873	-0.0626608	0.0493682	-0.0261756	-0.00245175	0
217.8	-0.00409268	-0.0210894	0.00906093	-0.0235703	-0.00887229	-0.038646	-0.0575539	0.0381749	-0.0223869	0.0109514	0
218	-0.0056199	-0.00732674	-0.036696	0.00178317	-0.00448038	-0.0210894	-0.0550348	0.0212912	-0.0160044	0.02081	0
218.2	-0.0107012	0.0161306	-0.0182416	0.0311882	-4.46065e-05	0.033708	-0.0163969	0.0152909	-0.0243361	0.0195671	0
218.4	0.00325142	0.0196764	0.0350967	0.00863048	0.018486	0.0622262	0.019622	0.0261592	-0.014022	-0.00569845	0
218.6	0.0266354	0.0215863	0.0238748	-0.0221751	0.0316924	0.0392679	-0.0155773	0.0192345	0.0118422	-0.00396486	0
218.8	0.0133686	0.00181005	0.0278608	0.0153704	-0.0132606	-0.0051973	-0.0216249	-0.0347123	-0.0103482	0.0436384	0
219	-0.0402918	0.0151529	0.05102	0.031381	-0.015863	0.0153233	0.00526014	0.010446	-0.0168698	0.00903501	0
219.2	-0.0202408	0.057303	0.044499	-0.0595909	0.0150407	-0.0097125	0.0137905	0.0187337	0.0015829	-0.0107515	0
219.4	0.0114634	0.0294225	0.0345964	-0.0104479	-0.00803006	-0.0123143	0.0426934	-0.00231031	0.0078467	-0.00622094	0
219.6	0.019297	0.00846449	0.00710169	0.0376791	-0.0115751	-0.0107941	0.0411823	-0.0202179	0.0335326	0.0153574	0
219.8	0.0111268	0.00509336	-0.00587358	-0.00444227	0.0231809	-0.010054	0.00814904	-0.00453973	0.0426989	0.0036556	0
220	-0.000618103	-0.0443167	0.00934469	0.019795	0.00174915	0.00492771	0.0140195	0.0287608	0.0018623	-0.0410432	0
220.2	0.0145162	-0.0255379	-0.0465375	0.00809184	-0.0278863	-0.0443996	0.00133152	-0.0110143	0.0133664	-0.00578354	0
220.4	-0.015326	-0.00373051	-0.0636624	-0.00918161	-6.02909e-06	0.00127375	-0.0555499	-0.0263639	-0.010189	-0.0134546	0
220.6	-0.0385388	-0.0495408	-0.0780521	-0.0281186	0.00438006	-0.0155793	-0.0344774	-0.0433837	-0.0100717	-0.00757864	0
220.8	-0.0214371	-0.031958	-0.0453387	0.0175251	-0.0314069	-0.0437885	0.019119	-0.0158352	-0.00570041	0.0225909	0
221	-0.0239791	0.0148997	-0.0153422	0.0223163	-0.0364517	-0.0180192	0.00329392	7.56143e-05	-0.0202931	0.027531	0
221.2	-0.042139	-0.00144079	-0.0251148	-0.0424245	-0.0158201	0.0222916	-0.0606829	-0.0137074	-0.0245049	0.0102226	0
221.4	-0.00868068	-0.0247427	0.0150087	-0.022532	-0.0173693	0.0396376	-0.0488213	0.00836092	0.00194405	0.000711697	0
221.6	0.00510411	-0.0417948	0.0604997	0.00793467	0.0228274	0.0100264	0.0548884	-0.0274514	0.0424406	-0.0227708	0
221.8	-0.00955481	0.0311737	0.0169663	0.0243459	0.0158518	0.0229866	0.00484724	0.0332527	0.0369858	-0.0107128	0
222	-0.028985	0.00588208	0.0266979	-0.0323111	0.00214334	0.0193778	-0.000204449	0.0514624	-0.0127342	-0.0244114	0
222.2	-0.0123874	-0.0427444	0.0111705	-0.0517722	0.000253465	-0.00217792	-0.00632181	-0.00598161	-0.0309508	-0.0215446	0
222.4	0.0179902	-0.0331421	-0.0214574	-0.00487324	0.0149889	-0.00654062	-0.0107054	-0.039594	-0.00667125	0.00657497	0
222.6	0.0180272	-0.00884323	0.000698434	0.00652454	0.0346719	0.00342869	0.050968	-0.0267987	0.0159502	0.00530425	0
222.8	0.0127835	0.0417019	-0.0333701	0.00183813	0.00895364	0.00958949	0.0402941	0.00415735	0.0254102	0.0072357	0
223	0.0185828	0.0265933	-0.0212938	0.0450548	-0.020149	-0.0118746	0.0644896	0.0722964	-0.00147787	0.0380014	0
223.2	-0.00631054	0.0166738	0.00520939	0.0032702	-0.00396353	-0.015183	-0.0118704	-0.0122551	0.00368622	0.037464	0
223.4	-0.00943805	0.0359871	0.0109806	-0.0271914	-0.00678783	-0.01795	-0.0252761	-0.0529524	0.0063904	0.00657131	0
223.6	0.0400905	0.0394112	0.0141387	-0.0117727	0.00373227	-0.027049	0.00727285	0.0373714	-0.00643622	-0.0135838	0
223.8	0.0572132	-0.00629431	0.013401	0.0247602	0.0341015	0.00972955	-0.00146385	0.0568857	-0.00527461	0.000475869	0
224	0.0124636	-0.0504148	0.0246969	0.0668919	0.0181879	0.0656865	0.0200356	-0.0327257	0.00224276	0.00520413	0
224.2	0.0240815	-0.00470652	0.0810625	0.0353924	0.0103437	0.025233	0.0509816	0.00032142	-0.00216908	-0.0433091	0
224.4	0.00865992	0.0543708	0.00742497	0.0145809	0.0272721	0.0199313	0.0186651	0.000589028	0.0130454	-0.0166397	0
224.6	-0.0257948	-0.0273444	-0.0345962	-0.0133121	-0.00735236	0.0283019	-0.0465151	0.00196634	-0.0377577	-0.0153835	0
224.8	-0.00790524	-0.0228838	0.0318082	-0.0131783	0.00098709	0.000585812	0.00491981	0.0282085	-0.0175626	-0.00579108	0
225	0.00975083	0.0325121	0.034447	-0.0043261	-0.00421361	-0.00524732	0.0377119	0.0170264	0.00876176	0.0189007	0
225.2	-0.0114256	0.000295742	-0.0510565	-0.0256082	-0.0380507	0.011311	-0.0237871	-0.0058789	-0.0260596	0.0136997	0
225.4	-0.00520761	0.0236336	-0.0209739	-0.0448064	0.0168641	-0.0315851	-0.0107369	0.00905566	0.0247718	0.00807026	0
225.6	-0.014928	0.0401822	0.0391898	-0.0535572	-0.030294	-0.0449346	-0.0611602	-0.055462	0.0232439	-0.000726606	0
225.8	-0.0189549	0.0302761	-0.03676	-0.00139897	-0.0124774	-0.0119501	-0.0201023	-0.0263525	0.000311731	-0.00547872	0
226	-0.00238378	0.000307234	-0.0224718	0.0498868	-0.00926194	-0.0193517	-0.0225432	-0.0504761	0.00183681	0.0158013	0
226.2	0.00548341	-0.0267643	-0.00319892	0.0376872	-0.0107372	-0.0431116	0.0075099	-0.0227797	-0.0224434	0.00290139	0
226.4	-0.0151712	-0.050908	-0.0165423	0.0146608	0.00931386	-0.0351304	0.048859	0.0508021	-0.0363033	-0.0136741	0
226.6	-0.0244098	-0.0532609	0.0390768	0.0294493	0.0108677	-0.0132579	-0.0202501	0.0243538	0.00429012	0.00968645	0
226.8	0.0178425	0.00154965	0.0151732	0.0100309	0.0192643	0.00277417	-0.0509229	0.0323374	0.00193549	-0.00734326	0
227	0.0424157	0.0241888	-0.0502134	-0.0385002	0.0123878	-0.000544923	-0.0593483	0.0337484	-0.00166894	0.0136906	0
227.2	0.00618006	0.0215662	-0.0214491	0.00982583	0.00779161	0.00160171	-0.0424305	-0.0231539	-0.00180675	0.0075044	0
227.4	-0.00790608	-0.064112	0.0281612	0.0369286	-0.00947181	0.0196458	0.0399718	-0.0105273	0.00512425	0.00436362	0
227.6	-0.00975631	-0.0632798	0.0211481	-0.0116707	-0.0232001	0.0135922	0.0368078	0.0427945	0.00954896	0.00423143	0
227.8	-0.0157878	0.0322848	-0.0125761	-0.0401011	0.00368578	-0.008058	-0.0185998	0.0183443	0.0145575	-0.000254767	0
228	0.00812026	0.0122882	-0.0470707	-0.0250961	0.0325975	0.00124957	0.0410721	-0.0212159	0.0104111	0.0120694	0
228.2	-0.0019367	0.00358323	-0.0794021	-0.0408212	-0.0123383	0.00234365	0.0212681	0.0136214	-0.0271074	-0.00966893	0
228.4	-0.0184116	5.52807e-05	-0.00997626	-0.0246224	-0.0369727	-0.00695505	0.027247	-0.0531027	0.0264324	-0.0463852	0
228.6	-0.00759713	0.0075451	0.00855147	0.0212191	-0.0267656	0.00162433	0.0137096	-0.0117817	0.00901476	-0.00639192	0
228.8	0.0146139	0.0438926	-0.00605754	0.00319665	0.00265509	0.0273174	0.0008958	-0.00670026	-0.0149953	0.012843	0
229	0.000663242	0.035522	0.00221269	0.0356749	0.000401374	0.0189266	-0.0108367	-0.0457576	-0.00606883	-0.0118877	0
229.2	-0.0205811	-0.0349581	-0.00490744	0.0777367	-0.00492172	-0.0111242	-0.0232647	0.00258931	-0.0190204	-0.0172624	0
229.4	0.00997019	-0.043559	-0.0189926	-0.058108	0.0380036	0.00465857	0.0112597	0.0173909	-0.0129847	-0.0244208	0
229.6	0.00740847	0.0140399	0.0184359	0.0189342	-0.0183302	3.68224e-05	0.0156149	0.0113796	-0.00867592	-0.0156108	0
229.8	0.0102928	0.0573051	0.028385	0.00339505	-0.000799975	-0.018827	0.00314403	-0.0195484	0.00330213	-0.035468	0
230	-0.0200105	0.0232628	0.0701566	-0.0244887	0.0271015	0.00553054	0.0112988	-0.00874843	-0.00910455	0.00996249	0
230.2	-0.0231056	-0.0246629	0.059166	0.00288452	0.0109177	0.00774585	0.0174897	-0.0131391	0.00277536	0.0487536	0
230.4	0.00707325	-0.00754491	0.0113706	0.00125865	-0.00813298	-0.0100827	-0.0150671	-0.035489	0.0271338	0.0219037	0
230.6	0.0123267	0.0486611	0.0239142	-0.0309699	-0.0159794	0.00228223	-0.0252619	-0.0057201	0.00668493	0.00078114	0
230.8	0.0345219	0.0678669	-0.00727578	-0.015266	-0.0226997	-0.0121145	0.0537635	0.0160653	0.0104388	-0.012606	0
231	0.0132288	0.0387669	-0.000875844	0.0244236	-0.00132687	0.0388737	0.0463158	0.0224206	0.0445839	-0.0153124	0
231.2	0.0138027	0.00089419	0.0150174	-0.0320079	-0.00227851	0.0143907	-0.00136363	0.0191125	0.0382736	0.00251524	0
231.4	-0.00237473	-0.00401074	-0.0503519	-0.0265751	-0.0217055	0.0415474	-0.0420235	0.0138427	0.00526747	0.000359171	0
231.6	-0.00471926	-0.0382402	-0.0661825	0.0200276	-0.00357021	0.0595355	-0.0439898	-0.00403264	0.00089858	-0.0137816	0
231.8	0.0156223	-0.0814061	-0.00172867	0.0014281	0.0325024	0.000296136	-0.00195815	-0.0111027	0.00279938	-0.0179458	0
232	-0.0051987	-0.0240817	-0.0161508	-0.0089917	0.0139149	0.00472712	0.0356491	0.0357558	-0.0203264	-0.0178011	0
232.2	0.00285595	0.0261667	0.0026401	-0.0065619	-0.015717	-0.00352706	0.034309	0.0736544	0.00223138	0.0123704	0
232.4	-0.00730305	-0.020532	0.0529014	-0.0144064	0.00929336	-0.0116216	0.00452805	0.00264049	0.00692884	0.0328692	0
232.6	-0.0106023	-0.0215684	0.00419381	-0.0350972	0.00897067	-0.0270556	-0.0137348	-0.0108138	-0.00201232	0.00691109	0
232.8	-0.0239005	-0.0540971	-0.0476704	-0.0240293	0.0269581	-0.0357023	-0.0211282	-0.00348015	0.00259861	-0.00547064	0
233	-0.00158307	-0.0326724	-0.0391656	-0.00144222	0.041283	-0.00936141	-0.0405018	-0.0266332	-0.0110245	0.0075221	0
233.2	0.0364861	0.0577007	-0.0243336	0.0154497	-0.01298	0.0119706	-0.0432559	-0.0391786	-0.0372786	0.00911418	0
233.4	-0.0202797	-0.0141802	0.00453069	0.0583854	-0.0449634	-0.018395	0.00976371	-0.03169	-0.0192526	0.0105882	0
233.6	-0.00786114	0.0635217	0.0225444	0.0403267	-0.0180401	0.000978	0.0336185	0.0545679	-0.0265163	0.000975716	0
233.8	-0.0131758	0.00484656	0.0354823	0.0413717	-0.0074739	0.0237109	-0.0112038	0.031928	0.000873074	0.0204075	0
234	-0.00488646	-0.0375559	0.0371653	0.0232574	0.00304688	-0.00351266	0.0124438	-0.013729	0.0158032	-0.00513262	0
234.2	-0.0225846	0.0115379	-0.000278601	-0.0139186	0.0205114	-0.039557	0.00700444	-0.00497992	-0.000468444	-0.0199531	0
234.4	-0.0172014	0.0269727	-0.00668364	-0.00509924	0.0236577	-0.0233969	-0.0284344	0.00333706	-0.00765858	0.00105703	0
234.6	0.0506253	0.00739881	0.0320383	0.0258523	0.00420929	0.00712471	0.0160977	-0.00550297	-0.00621228	-0.00084382	0
234.8	-0.0147396	0.0183753	-0.0285253	-0.00319708	-0.0194682	-0.0189951	-0.00961106	0.00616349	-0.0176921	0.023708	0
235	-0.0266949	-0.0206137	-0.00803735	-0.0065005	0.0151275	-0.0040065	0.0325376	-0.0272087	0.0137161	0.0107656	0
235.2	0.0255128	-0.0207283	0.0238417	-0.0159348	-0.00505175	0.0132085	0.0117366	0.00747213	0.0148469	-0.0159447	0
235.4	0.0150957	0.0020113	-0.0056399	-0.00886503	-0.00107936	0.0115677	0.0104187	0.0123218	0.000620599	-0.0104911	0
235.6	-0.0017577	-0.00875561	-0.0165745	0.00835862	0.0127187	0.000631736	0.0411751	-0.00244158	0.00610138	0.00929719	0
235.8	0.0226939	0.00206145	7.78605e-05	-0.0195206	-0.010826	-0.00144523	0.0183824	0.00718366	0.00150392	0.000711004	0
236	-0.0118054	0.0494128	-0.0310631	-0.0469232	-0.00573571	0.0133099	-0.0245199	-0.0197797	-0.020728	-0.0213931	0
236.2	-0.036503	-0.0172066	-0.00409159	0.0281633	-0.0274508	0.00756786	-0.0489915	0.0173192	0.00603133	-0.00609754	0
236.4	-0.0243049	-0.0238354	0.0136405	0.018862	-0.0082518	-0.0098863	-0.00046009	-0.00562843	0.0306642	0.0169096	0
236.6	0.0126357	0.0190085	-0.0208	-0.00338061	-0.0200874	-0.00213599	0.0209594	-0.0168781	-0.0108839	0.0131593	0
236.8	0.0262011	0.0468533	-0.038284	-0.00197265	-0.0238489	0.0166257	0.00794105	0.00010185	-0.0138537	0.00874327	0
237	-0.0152666	0.00825873	-0.000799276	-0.0167769	-0.000990934	0.00204526	-0.00663194	0.00880579	0.00208016	-0.000340026	0
237.2	-0.0357109	-0.0332418	0.025141	-0.0152505	0.00210209	-0.0178699	-0.0171268	0.000648784	-0.0247587	-0.0153182	0
237.4	0.0345015	0.0228821	-0.00906377	0.0342577	0.012939	0.0162241	0.00156939	-0.0267356	0.0158865	-0.00268497	0
237.6	0.0229949	-0.0159538	-0.027697	0.0128763	0.0120769	0.0116881	0.0175462	-0.023812	0.024047	-0.0383133	0
237.8	-0.0155475	0.024464	0.00701539	-0.0298071	-0.0080766	-0.0274672	-0.0125037	0.0128315	0.00261941	-0.0279116	0
238	0.0203117	0.0487466	-0.0122237	0.0295913	0.0160051	0.00910143	0.00546114	-0.00765171	-0.00058222	-0.0176752	0
238.2	0.0268399	0.00193011	0.0145036	0.0725125	0.0039892	0.0201366	0.0317252	-0.0186819	-0.00337049	-0.0570273	0
238.4	-0.0143098	-0.0237451	0.0691416	-0.00115403	-0.0269896	-0.0113148	0.0244035	0.000908416	-0.00393685	-0.048724	0
238.6	0.0124548	-0.00989388	0.0126268	-0.0611327	0.0264072	0.0310221	0.0247068	-0.0120326	0.0168499	0.0270471	0
238.8	0.028648	-0.00765747	0.0297138	-0.0169479	0.0220527	0.0158542	-0.0191655	0.0412804	0.000483775	-0.00745124	0
239	0.0365281	0.0122462	0.025883	0.0670278	-0.000637297	-0.0148676	-0.0275452	0.0578527	-0.0139362	-0.0153039	0
239.2	-0.00171138	-0.046749	0.0169323	-0.038896	-0.00921026	0.0130356	-0.00998906	0.000211553	-0.0112014	0.0255769	0
239.4	-0.0220047	-0.020855	0.0062932	-0.0435088	-0.0223728	-0.00972021	-0.0342619	-0.00674395	0.0166831	0.0310695	0
239.6	-0.00552343	0.0187073	-0.00811508	0.0162163	-0.0201596	-0.0301327	-0.00562732	0.0255679	-0.000907875	0.0374439	0
239.8	0.00347404	-0.0311977	-0.0172145	-0.0559794	0.00900287	0.0158156	0.0493027	0.00928908	-0.0413507	0.065117	0
240	0.000281673	-0.000281417	-0.0136479	-0.0434632	0.0172406	-0.000912193	-0.035758	-0.021537	0.000212246	0.0343829	0
240.2	-0.0216957	-0.00431045	0.00897643	0.0064876	0.0079129	-0.0107334	-0.0326393	-0.0409498	-0.00782973	0.0200921	0
240.4	-0.029475	-0.00815948	-0.0627666	0.0144942	0.00864926	0.013156	-0.0149609	0.0174011	0.00671438	-0.0179242	0
240.6	-0.00737233	-0.0329362	-0.0519238	-0.0120154	-0.0118862	0.032344	0.0106099	-0.00837261	-0.0105784	0.0166955	0
240.8	0.00565611	0.007292	0.0115426	0.0534729	0.0140162	0.0030346	0.00667994	-0.0374951	-0.00219911	0.0158346	0
241	0.00477476	0.0316212	0.0229457	0.08091	0.0331752	-0.0177545	-0.014708	0.0206665	0.0239221	-0.0358352	0
241.2	0.00522093	-0.0405365	0.00155915	-0.0160756	-0.017461	0.0102792	-0.00394806	0.0391092	0.00861738	-0.0133856	0
241.4	-0.0106239	-0.015574	-0.0306507	0.0244795	0.0091782	-0.00222218	-0.00929711	-0.0114562	0.0339621	0.00921118	0
241.6	0.00795376	-0.0310979	0.00437329	-0.0255289	0.00911714	-0.0216823	-0.0185372	0.021193	0.0156506	0.0027185	0
241.8	0.00411525	0.0231877	0.00796819	-0.0202857	-0.0503215	-0.00596988	-0.0022886	-0.019604	0.0239964	-0.037923	0
242	-0.0346638	0.0294971	0.0212629	-0.0284913	-0.0223185	-0.0262408	-0.0474252	-0.00428683	0.00354356	-0.000603101	0
242.2	-0.0381135	0.000374256	0.0441144	-0.0390287	0.0258607	-0.0440033	-0.0229324	0.0245161	-0.00802445	0.0204959	0
242.4	0.00514543	0.00432723	0.0269532	-0.0159479	0.00013172	-0.0166029	0.0472114	-0.0176921	0.00153821	-0.0149384	0
242.6	0.0206324	-0.00765621	-0.0121719	-0.0256123	-0.010375	-0.0101656	-0.0293559	-0.00853427	-0.0274117	0.0185724	0
242.8	5.82742e-07	0.0186187	-0.0362081	0.00623789	-0.00708616	-0.00353121	-0.0252655	0.00256158	-0.00427465	0.020941	0
243	-0.0111416	0.00963419	0.00652456	0.0198318	0.00557912	0.0456815	0.00575908	-0.0689664	-0.0513988	0.00932513	0
243.2	0.0167263	-0.0316515	0.00231723	0.00155793	0.0235016	0.00763233	0.0488928	-0.015491	-0.0207434	-0.0145824	0
243.4	0.0226686	0.0141594	-0.00921669	0.00650068	-0.00686504	-0.0265861	0.0370346	0.049693	-0.000845701	-0.00340425	0
243.6	0.0197277	0.0399589	-0.00605347	0.0266139	-0.0134322	-0.0182788	0.0143933	0.0179755	-0.00181868	-0.00480417	0
243.8	0.0334075	-0.0232716	-0.0154305	0.0101076	0.0222894	-0.00455844	0.0286667	-0.00955111	0.0435745	-0.0272295	0
244	0.00902032	0.0125285	-0.0107984	-0.0189571	-0.0088047	0.0486814	0.0119787	-0.00850431	0.0302163	0.0196604	0
244.2	0.0076633	0.028993	-0.0375421	-0.00195693	0.031142	0.0208509	0.0395359	-0.0251414	0.0163336	0.002988	0
244.4	0.0250987	0.00621929	0.0331648	0.0241454	0.00490232	0.0260536	0.00399933	0.0322819	0.0111957	-0.00330608	0
244.6	-0.0147813	0.00145148	0.0746087	0.016549	-0.0108122	0.0413798	0.0384877	0.0291364	0.021257	-0.00348251	0
244.8	-0.0284266	0.0269096	0.0351158	0.0115042	-0.0152965	0.00256624	-0.00604539	-0.0169221	0.00221601	0.000100868	0
245	0.0074053	0.0330643	0.00452934	0.00756753	-0.00880461	-0.0107274	-0.0757394	0.0033692	-0.0379652	0.00742227	0
245.2	-0.0107948	-5.89369e-07	0.0116493	-0.0153046	0.0330396	0.0237163	0.0169116	0.0334502	-0.0374592	0.00618477	0
245.4	-0.0360999	-0.0261299	0.00596402	-0.010057	0.0141726	-0.0353095	-0.00473685	-0.00173979	-0.0131165	0.0144947	0
245.6	0.00935882	-0.0392493	-0.00543058	-0.0414965	0.0227898	-0.015609	0.000380265	0.0293776	0.00297514	0.0035782	0
245.8	-0.0307837	-0.00595399	-0.0560948	-0.0143118	-0.022401	0.0158783	-0.0423139	0.00223989	-0.0177556	-0.0159459	0
246	-0.0326245	0.00591996	-0.0624907	0.00960785	-0.0321387	-0.00969398	-0.021043	-0.0224477	5.04802e-05	-0.0137598	0
246.2	0.000648026	-0.0196037	-0.00206994	0.00989286	0.00256897	-0.0409829	0.0168045	-0.0161257	0.0249567	-0.00967332	0
246.4	-0.0105141	0.00296701	0.025348	0.0381667	0.00471793	-0.0254457	-0.0117006	-0.0107156	-0.00201301	-0.0131327	0
246.6	0.00997384	0.0546832	-0.00918609	0.0380822	-0.0101488	0.000380342	-0.00328241	0.00177925	-0.0280902	-0.00573405	0
246.8	0.0241092	-0.0223518	0.00137289	-0.0526665	-0.0276354	-0.00749509	0.00577588	-0.0441112	-0.0292879	-0.0248426	0
247	0.0208016	-0.036383	-0.00851064	-0.00722661	-0.0205582	-0.0123546	0.0195137	-0.0548937	0.0245765	-0.0357703	0

## Sheet: fly2
Time	gamma-L5	gamma-L4	gamma-L3	gamma-L2	alpha-L	gamma-R5	gamma-R4	gamma-R3	gamma-R2	alpha-R	stimulus			Time	gamma-5	gamma-4	gamma-3	gamma-2	alpha	stimulus
0											0			0	0.00871959	-0.00291088	0.00682768	0.00545808	-0.00427499	0
0.2											0			0.2	0.00476213	-0.00480326	0.0179878	0.0312717	0.00913798	0
0.4											0			0.4	0.00937932	-0.0183496	0.00473477	0.0142829	0.00934942	0
0.6											0			0.6	0.0104152	0.0237842	0.00596151	-0.00175915	0.00158878	0
0.8											0			0.8	0.00811717	-0.000258775	-0.00156291	-0.00119664	0.00887471	0
1											0			1	0.0022864	-0.00840404	-0.010455	0.00430441	-0.00546756	0
1.2											0			1.2	-0.00137027	-2.25628e-05	0.0122777	0.00901125	-0.0096917	0
1.4											0			1.4	-0.00871718	-0.00857876	0.0114266	0.0022427	-0.000126838	0
1.6											0			1.6	-0.0206439	0.0135788	-0.00290468	-0.00161264	0.00110107	0
1.8											0			1.8	-0.0175826	-0.00495574	-0.00474458	-0.0177684	-0.00535206	0
2											0			2	0.00107314	-0.00406206	-0.00376773	-0.00790886	-0.00888919	0
2.2	0.00433288	0.0143604	0.00562253	-0.0144446	0.00859017	0.00465705	-0.00951707	0.00640909	0.00962485	-0.000484204	0			2.2	-0.0116823	0.0198383	0.00304822	-0.00224651	-0.00488497	0
2.4	0.00501099	0.0072111	0.0046541	0.025491	0.00147377	-0.0123344	-0.0486342	0.0106298	-0.00180039	-0.00934057	0			2.4	-0.00785128	0.00127455	-0.032752	-0.00130084	-0.00037023	0
2.6	0.0189527	-0.0216804	-0.0253264	0.0315096	0.00203628	-0.0425045	-0.0199796	0.0463988	-0.00282714	0.00643877	0			2.6	0.000353174	-0.000574784	-0.0154361	0.000822391	0.00814377	0
2.8	0.00157659	0.0648984	0.0217264	-0.0324951	0.0146184	-0.0213653	-0.0180699	0.018041	0.0133132	0.0132929	0			2.8	-7.00493e-05	0.00614805	0.0119657	-0.00446968	0.0164967	0
3	0.0177181	0.0445167	0.0514932	0.0106265	0.0176852	0.00403727	-0.0129624	-0.026332	0.00608418	-0.0072864	0			3	0.00883323	0.0182614	0.0163793	0.000546297	-0.00301057	0
3.2	-0.0213177	0.0402273	-0.0221475	0.0372999	0.00633552	0.0157779	-0.0412635	-0.0212944	0.0460712	-0.0103702	0			3.2	-0.00231895	-0.00393637	-0.0108536	0.000408641	-0.00510409	0
3.4	-0.0190325	0.0252725	-0.0435327	0.0195983	1.57617e-05	0.0143833	-0.0565649	-0.0310609	0.0251388	-0.00864603	0			3.4	-0.00062884	-0.0154894	-0.00965281	-0.00965844	-0.00697663	0
3.6	0.0226867	-0.00955781	0.00577502	-0.00371893	-0.0236276	-0.0108332	-0.056099	-0.0450179	-0.0309141	-0.0193377	0			3.6	0.00618516	-0.0157364	-0.00820302	-0.0197421	0.00111594	0
3.8	-0.0161772	-0.0286503	-0.00291248	-0.0297919	-0.0561417	-0.0227224	-0.0538101	-0.0274476	-0.0155371	-0.0222885	0			3.8	0.00533459	-0.0120648	-0.020888	-0.0139543	-0.00652856	0
4	-0.0583463	-0.0898187	-0.00974058	-0.0202941	-0.0268199	0.0149616	0.0137992	-0.0448016	-0.0255438	-0.0129544	0			4	0.00327015	0.00249664	-0.00774915	0.00315623	-0.00628919	0
4.2	-0.0417377	-0.00344438	0.0254849	0.0170186	0.0021599	-0.0164842	0.0552103	-0.00811724	-0.00491004	0.00382942	0			4.2	0.00180651	0.00564394	0.0012005	0.0129293	0.0211732	0
4.4	-0.00483422	0.0232226	-0.00373823	0.0571957	0.0152961	-0.015939	0.034054	0.0126571	0.00279419	0.0358014	0			4.4	-0.0137548	0.0073311	0.00209258	-0.000263804	-0.00401768	0
4.6	0.0286944	-4.89248e-05	0.0254235	0.00140233	-0.00031067	0.00374323	0.0130412	0.0168059	-0.0404465	0.0327094	0			4.6	-0.0143116	-0.00811865	0.038291	-0.00474771	-0.0167101	0
4.8	0.00607292	0.00234531	0.0126062	-0.0231903	-0.00901346	0.0166729	-0.00930877	-0.0125116	-0.0270046	0.0162484	0			4.8	0.00733801	-0.0242314	0.0105594	0.00811246	0.00112244	0
5	-0.0193978	0.023254	-0.0361953	0.00742261	0.00929731	0.0271469	-0.028802	-0.020859	0.037765	0.00446805	0			5	-0.0102237	-0.00789862	0.00608404	-0.0121957	0.00402904	0
5.2	0.0198542	0.023675	0.0153494	-0.0459095	0.0199382	0.0170969	0.00221082	0.0417478	0.0268092	-0.0215527	0			5.2	-0.000784432	-0.005771	0.0187324	-0.00060805	0.0013267	0
5.4	4.46831e-05	-0.0128002	-0.0429935	-0.0636048	0.015212	-0.00973436	0.0296091	0.0311349	0.00927647	-0.0175255	0			5.4	0.00963305	-0.00356299	0.00677778	0.00863431	0.00324632	0
5.6	-0.00904295	-0.00199552	-0.0305427	-0.0478989	0.0125102	-0.0102131	-0.022363	-0.0119729	0.021736	-0.00938215	0			5.6	0.00307311	-0.0127874	0.00523027	0.00453869	-0.0175174	0
5.8	-0.000534166	0.0121084	-0.0216923	0.0219116	0.00693726	-0.0143561	-0.0498373	-0.0625209	0.0186402	0.0131452	0			5.8	0.00467021	-0.0111988	-0.00755635	0.00790376	-0.00294316	0
6	0.0244187	0.00807458	-0.0137916	0.0323004	-0.0150393	0.00665234	0.00284054	-0.0164764	-0.00550196	-0.0263644	0			6	-0.00919416	0.0229056	-0.024964	-0.0128799	0.012026	0
6.2	0.0337927	-0.0131324	0.0173292	0.000801069	-0.0194221	-0.00316281	0.0660628	0.0530535	-0.000729276	-0.0341909	0			6.2	-0.00506536	0.0136971	-0.0121827	-0.0016075	-0.00153148	0
6.4	-0.00421138	-0.0198339	0.0300615	0.00341155	-0.00813239	-0.0568598	0.0492825	0.020984	0.00367781	0.0190782	0			6.4	0.00837695	0.00676	-0.00166821	0.0212921	0.00353358	0
6.6	-0.0291938	-0.00223271	0.0295669	0.00586026	-0.0252207	-0.0298149	-0.0142666	-0.00893817	-0.0312262	-0.0155901	0			6.6	0.00467999	0.0121932	0.006253	0.00426155	0.00430095	0
6.8	0.0231851	-0.0363426	0.0659668	0.0563173	-0.0111087	0.0245449	0.00723018	0.042517	0.0187664	0.0113571	0			6.8	0.000195029	0.00413958	0.00895052	-0.00886467	0.0097698	0
7	-0.0131929	0.0539626	0.0566367	0.0629663	0.00223316	-0.00147866	0.0247566	-0.0164156	-0.0105994	0.0297576	0			7	0.0127502	0.0253266	0.00955247	0.0101706	-0.00142673	0
7.2	-0.00630332	0.0504155	-0.0267526	0.0123813	-0.00442283	-0.0211397	-0.0130641	-0.0315727	-0.0262888	0.0227194	0			7.2	0.0190768	0.0175051	5.8618e-05	0.0143782	0.00854628	0
7.4	0.00229238	-0.00744972	-0.0472988	-0.036912	0.010163	0.0287986	-0.0427881	0.00551993	-0.013527	0.00871899	0			7.4	0.0266476	0.0215026	-0.00105801	0.0492909	0.0136499	0
7.6	-0.0170977	-0.00471589	0.00547198	-0.0522219	0.0300903	0.0421707	-0.0238064	0.0326209	0.0147054	-0.0110067	0			7.6	0.021043	0.0329621	0.0013793	0.0434213	0.0175265	0
7.8	0.00331245	-0.0269598	0.0135796	-0.0482771	0.0136892	-0.0208245	-0.00681354	0.0220883	0.0440763	-0.0192085	0			7.8	0.0111501	-0.00594844	0.021978	0.0367204	0.0260855	0
8	-0.0145997	-0.0733728	-0.00845459	-0.025428	0.00413541	-0.00819255	-0.0217442	-0.0758651	-0.0106583	0.00614189	0			8	0.0209041	-0.0149921	0.014226	0.0423667	0.00877366	0
8.2	-0.0252777	-0.0279904	-0.039449	0.0422158	0.00994599	0.0234081	-0.00454959	-0.0410887	-0.00180073	0.0087565	0			8.2	0.0289557	0.0159376	-0.00108161	0.0151475	0.0094474	0
8.4	0.00210978	0.0187437	-0.0149029	0.0621964	0.0294828	-0.0114519	-0.00483515	0.0276056	0.025332	-0.00322112	0			8.4	0.0407019	0.0248592	0.0153615	0.013116	0.0260318	0
8.6	0.00153039	0.00639324	0.0113561	-0.0148379	0.0152434	-0.0157286	0.0317752	-0.00790373	-0.0115291	-0.0150473	0			8.6	0.0256887	-0.00385148	0.0108335	0.0224423	0.0140394	0
8.8	-0.0111336	-0.0303532	-0.00881562	-0.0476552	-0.0282065	0.000411588	0.0520528	-0.0306318	-0.0410126	-0.00109918	0			8.8	0.0041277	-0.00835893	-0.0196663	0.00387064	0.0108541	0
9	-0.000607334	-0.0337019	-0.0516043	-0.0022295	-0.0324515	-0.00982287	0.00330361	0.0111515	-0.0144512	0.00167788	0			9	0.0319638	0.00832113	0.00833419	0.0184127	0.0204961	0
9.2	-0.00202311	0.0142964	-0.0693149	-0.00367423	0.00944296	-0.00021357	-0.0261464	-0.00176546	9.36814e-06	-0.0336951	0			9.2	0.0271465	-0.00140606	0.021687	0.0153516	0.0170679	0
9.4	-0.00561158	0.0563976	-0.0171889	0.0014705	0.00807114	0.000768358	2.26581e-05	0.00198213	0.00299977	-0.00493789	0			9.4	-0.00210896	0.000285881	0.00974765	0.00107847	0.00399754	0
9.6	0.00797066	0.00221816	0.0934725	-0.00780485	-0.0118485	-0.0100893	0.04952	0.0275946	-0.00144168	0.0127969	0			9.6	0.0283781	-0.0198987	0.0135749	0.00951142	0.00863676	0
9.8	-0.0144924	0.0727052	0.0719135	-0.0232355	-0.0118461	0.0396496	-0.0257298	0.0313657	0.0200083	0.0236363	0			9.8	0.0205616	-0.0151233	0.0172958	0.0186486	0.0220057	0
10	0.00544936	0.058556	0.0128872	-0.00837286	-0.00645473	0.038977	-0.0373645	0.0204101	0.025903	0.0200425	0			10	0.0326098	0.0089903	0.0258244	0.0215152	0.0211923	1
10.2	0.0351363	-0.0174367	-0.012583	0.0134634	-0.00329753	0.00197451	0.0402824	0.034264	0.00286061	-0.00582607	0			10.2	0.0826123	0.03545	0.0504009	0.0478034	0.0303989	1
10.4	0.00117774	0.017885	-0.0351381	0.0140149	-0.00532395	0.0208939	0.0118724	0.034342	-0.00671131	0.00321546	0			10.4	0.114397	0.0821047	0.0759924	0.0775998	0.0198766	1
10.6	0.00604738	-0.010076	0.00208712	0.0313894	-0.0137052	0.0160609	-0.0527703	-0.0160228	0.00905092	0.0491056	0			10.6	0.110031	0.0812696	0.0659991	0.0815393	-0.00297448	1
10.8	0.0503229	-0.00857183	0.0329468	0.0564441	0.0205269	-0.00868523	0.03042	0.0109767	0.0283167	-0.0143567	0			10.8	0.0705797	0.0720891	0.0443383	0.0425077	0.00342908	1
11	-0.00176863	-0.00137705	-0.0023126	0.0164814	0.0150389	0.00287647	0.0737823	-0.0115498	0.0100974	-0.0147151	0			11	0.0636191	0.0577703	0.0528839	0.0270671	0.0109368	1
11.2	0.00444975	-0.00966783	0.00886298	-0.00769049	-0.0109803	0.00913153	-0.00169864	0.0337496	0.0122422	-0.00687829	0			11.2	0.0706043	0.0556665	0.0282514	0.0537769	0.00853929	1
11.4	0.0101473	-0.041367	-0.0261941	-0.00122289	0.00501489	-0.0403841	-0.0271464	0.000935182	0.00872774	-0.0211069	0			11.4	0.0520755	0.0331163	0.0290568	0.0308472	0.000873741	1
11.6	-0.0357818	-0.0650609	-0.073998	-0.0221312	0.0158885	-0.0477753	-0.0273348	-0.0912676	-0.0174226	-0.00609045	0			11.6	0.0409445	0.0235759	0.029644	0.0330051	-0.00400425	1
11.8	-0.0210643	-0.0456622	0.000245927	-0.0590802	-0.00808186	0.012171	-0.0675181	-0.0309208	-0.0313912	0.0168179	0			11.8	0.0350932	0.0426392	-0.00197841	0.0280178	-0.0124278	1
12	-0.010226	-0.0227399	0.015295	-0.0409145	0.0188332	-0.0384339	0.0551746	-0.0103755	-0.0379519	-0.00659942	0			12	0.0303139	0.0273836	0.0188676	0.0165348	-0.00560632	1
12.2	-0.0572469	-0.0199172	-0.00219048	0.0140668	-0.0165681	-0.0428307	0.0600791	-0.0536904	0.019831	-0.0240741	0			12.2	0.0102507	0.0269593	0.0292068	0.0112189	-0.00555165	1
12.4	-0.0376552	0.0459163	0.0195518	-0.0406162	-0.0321808	-0.00883295	-0.0349713	-0.0097745	-0.0271582	-0.0149106	0			12.4	0.00759174	0.00910126	-0.00564187	0.0051999	-0.00644286	1
12.6	-0.0168713	0.0528604	0.0307574	-0.000570223	-0.0217435	-0.00219027	-0.0404132	0.0363904	-0.0459347	0.0256289	0			12.6	-0.00288957	-0.000443454	0.0157952	0.0101872	0.00319611	1
12.8	0.00768322	0.00956987	0.00457034	0.0457595	-0.0169737	0.00431047	-0.00118174	0.00699118	-0.00201865	0.0205132	0			12.8	-0.0104919	0.00292063	0.0120675	-0.00139099	-0.0142682	1
13	0.0406649	-0.00883373	0.0121039	-0.00797309	-0.0110992	0.0290232	-0.000638797	-0.00350754	0.00610305	-0.0196786	0			13	-0.0171509	-0.00514268	-0.0131827	-0.00137487	-0.0207	0
13.2	0.0240762	-0.00943629	0.0482594	0.0109216	0.00645101	0.0243434	0.0102545	0.0287556	0.00332911	-0.00681282	0			13.2	-0.0167865	-0.0106041	-0.00681919	-0.00303884	-0.0140807	0
13.4	0.0646291	0.0629406	-0.0127633	-0.0164084	0.0267063	0.00742525	-0.0208811	-0.0234379	0.00109156	-0.0183257	0			13.4	-0.00673425	0.000596241	-0.00315805	-0.0113716	-0.0154609	0
13.6	0.0226795	-0.0156874	-0.00398183	0.0338992	0.0244461	-0.00387041	0.0174563	0.0322778	-0.0108034	0.0271247	0			13.6	0.00545775	0.00810986	0.00213245	0.000510318	-0.00685693	0
13.8	0.00360417	-0.0204207	-0.0100002	0.0481525	-0.00383672	-0.000138147	0.0312735	0.0168099	0.00420555	-0.00383733	0			13.8	-0.0058519	0.00418655	0.0123337	-0.00211381	-0.00932361	0
14	0.010208	0.0218669	-0.0224376	0.0030138	-0.0181415	0.00530014	-0.0628796	-0.0141227	0.00803935	-0.0161874	0			14	-0.00553115	0.00606608	-0.00216282	-0.00967046	-0.0185013	0
14.2	-0.0166673	0.0167567	-0.0383849	-0.00557003	0.011795	-0.0100955	-0.0854754	0.021177	0.00401856	-0.00513044	0			14.2	-0.0118353	0.0211383	-0.00975343	-0.0157273	-0.0245069	0
14.4	-0.0305043	0.00422091	-0.033737	0.0149256	0.0399678	-0.0028647	0.0224893	0.0094271	0.0172938	-0.0302442	0			14.4	-0.0226731	-0.0141647	-0.0010796	-0.0294278	-0.018198	0
14.6	0.00188664	-0.0198533	0.0610491	0.0014715	0.00980628	0.0476636	0.0180073	-0.0587541	0.00986354	0.0189954	0			14.6	-0.0233338	-0.0293739	0.0239259	-0.0274673	-0.0111816	0
14.8	-0.0149883	0.000956503	0.0114154	0.0341752	-0.00739442	-0.00996178	0.0117914	-0.0258942	0.0253475	0.00399263	0			14.8	-0.0181547	-0.00623388	0.00946331	-0.00954488	-0.0242156	0
15	-0.0125007	0.0070493	-0.0107974	-0.0596447	0.00232213	0.031177	0.0222714	0.067743	0.0336486	0.0406929	0			15	-0.0266169	0.000506864	0.0152787	-0.00714798	-0.032234	0
15.2	-0.0199426	-0.0290782	0.0141013	-0.0798008	0.0192684	0.025941	0.0333251	0.0170667	-0.000648676	0.0342267	0			15.2	-0.0224752	-0.00993998	0.0112703	-0.014265	-0.0147234	0
15.4	-0.0142621	-0.0256766	0.0207457	-0.0137117	-0.013602	-0.00396481	0.0139931	-0.0345864	0.00691961	-0.00251994	0			15.4	-0.0124067	-0.01648	-0.0117836	-0.0190227	-0.00043372	0
15.6	0.0168816	0.00995508	-0.0111226	-0.00336657	-0.0393517	0.00454776	-0.0107661	0.00632509	0.00835751	-0.0138021	0			15.6	-0.0077986	-0.00811534	0.00356606	-0.0178883	-0.0089001	0
15.8	0.0169813	0.00501211	-0.0407214	-0.00823919	0.00704028	-0.0183423	0.00303592	-0.00830912	-0.0487576	-0.00910793	0			15.8	-0.0216915	-0.00125742	-0.00346574	-0.00674576	-0.0122519	0
16	0.00291148	0.0239879	-0.0156175	0.0318626	0.00461127	-0.00131478	0.0128909	-0.0150785	0.0171447	0.0506785	0			16	-0.0165214	-0.0254473	-0.0200191	-0.0019342	-0.00877982	0
16.2	0.00101689	0.0312936	-0.0234703	0.0307948	0.00416121	-0.0252799	0.00869826	-0.000766905	-0.0299445	0.0142211	0			16.2	-0.0095923	-0.0349041	-0.00332274	-0.00109289	-0.017482	0
16.4	-0.00950579	-0.0154559	-0.00763526	0.0146838	-0.0249399	-0.0227874	-0.0416081	0.0196803	-0.0549427	-0.0092858	0			16.4	-0.0205812	0.0154341	0.00139752	-0.00846252	-0.0190083	0
16.6	0.0142732	-0.0340634	-0.0102028	0.0229954	-0.0105052	0.00518959	-0.0387974	-0.0120662	-0.00748849	-0.0160763	0			16.6	-0.0149176	0.0145249	0.00728935	-0.0153626	-0.0035457	0
16.8	0.0200648	0.00944408	-0.0330028	0.000109133	0.00974733	-0.00457126	-0.00859068	-0.0189907	0.0305446	-0.0250856	0			16.8	-0.0106131	-0.00177352	0.00472356	-0.0070063	-0.00145609	0
17	-0.0181818	-0.00601499	-0.0387636	-0.00572962	-0.00138341	-0.0390199	-0.00740896	0.00922872	0.0249184	-0.0217229	0			17	-0.01099	-0.0036173	-0.0136807	-0.00268914	-0.00189489	0
17.2	-0.0148904	-0.094823	-0.0124752	0.0700412	0.0234688	-0.0291597	0.0261606	-0.0110164	0.00546073	-0.012604	0			17.2	-0.00604701	-0.00636414	-0.0165325	-0.0126009	-0.00232409	0
17.4	-0.0252943	-0.012401	0.0879712	-0.00134518	-0.00417175	0.00674441	0.0229992	0.0625375	0.00142309	0.0194438	0			17.4	0.00409919	0.0122979	-0.0152076	0.00481613	0.012201	0
17.6	-0.0352352	0.0424717	0.024518	-0.0172306	0.00360321	0.0252318	-0.0378603	0.0142057	0.0532136	-0.00897823	0			17.6	0.00471735	0.0259768	0.00200024	-0.00579482	0.00605202	0
17.8	0.0163066	-0.0629138	0.0171559	-0.0353452	0.0050434	0.0127384	0.00391355	0.00970251	0.0194786	0.00834188	0			17.8	0.0105048	-0.0206973	0.0198226	-0.00549185	0.00456902	0
18	0.0471505	-0.0209458	0.0188211	-0.0255189	0.00195262	-0.00559548	0.0325801	-0.0079853	-0.0359763	0.020899	0			18	0.0031738	0.000478508	0.00285418	-0.000902288	0.0131554	0
18.2	0.0177782	0.0888596	-0.0273505	-0.00427742	-0.00417807	-0.00216286	0.00478665	-0.0389677	-0.00751385	-0.0206644	0			18.2	-0.00353548	0.0212433	0.000169117	0.00557713	0.000222067	0
18.4	0.00413187	0.00136262	-0.0336209	-0.0285443	-0.0215992	0.00502722	0.00317632	0.0339903	0.0209845	-0.0280463	0			18.4	0.0112975	-0.0116316	-0.0033823	0.0149986	0.00356743	0
18.6	0.0127241	-0.0133439	-0.0416618	0.0118019	0.00268281	-0.0106926	-0.0295124	0.0565357	-0.0230875	0.00809398	0			18.6	0.00211577	0.00273512	-0.0155382	-0.00423068	-0.00349312	0
18.8	-0.00579032	-0.00407146	0.0630181	0.0489914	0.0286707	0.00650435	0.0450137	-0.00119748	-0.0106562	-0.000864168	0			18.8	-0.00513689	0.00370056	0.00681124	-0.00613571	0.00992646	0
19	-0.00415273	0.064134	0.0703047	0.0296948	0.00887205	0.0243443	0.0407044	-0.0325289	0.01015	0.00666078	0			19	0.00108036	-0.0325921	0.0251129	0.0124598	0.00587473	0
19.2	0.00470247	0.0520965	-0.000751006	-0.0534074	0.00331795	-0.0201151	-0.0296608	-0.0301159	-0.00106687	0.0146453	0			19.2	0.00267885	-0.00509315	-0.00557971	-0.00580847	-0.0151832	0
19.4	0.0165679	0.013659	-0.0287493	-0.0414267	0.00819036	-0.0285451	-0.0252789	-0.00148448	-0.0233774	-0.0141662	0			19.4	0.0106212	-0.0128548	-0.0116816	0.00242931	-0.00975999	0
19.6	0.0179192	-0.0169627	-0.00737864	0.018559	-0.00757453	-0.00251013	0.0263932	0.0189433	-0.0292273	-0.0222041	0			19.6	0.0177607	-0.00275585	-0.000663602	0.00785848	-0.00428895	0
19.8	-0.0203211	-0.0626976	0.0147322	-0.0270579	-0.0176344	-0.0246423	0.00727929	-0.00586298	-0.0174634	0.0148467	0			19.8	0.00239712	0.0088018	-0.00736385	0.0192333	-0.00872036	0
20	-0.0390297	0.0593272	0.0274097	0.016425	-0.0241626	0.0361116	-0.022102	-0.0238376	-0.00170436	-0.000995883	0			20	-0.0142975	0.00604388	-0.0172731	-0.00492939	-0.000953729	0
20.2	0.0201042	0.0104539	-0.0161381	-0.0222825	-0.0399352	0.011235	-0.0108241	-0.0666402	0.00610116	0.0365478	0
20.4	0.0173794	-0.00362542	-0.0225764	0.0124516	-0.00493568	-0.0202447	-0.0316064	0.00380735	-0.00277643	0.0187654	0
20.6	-0.0202563	0.00828408	-0.00788028	0.0245121	0.0136654	0.0100483	-0.0175911	0.0560965	-0.00403109	-0.0157128	0
20.8	-0.0152893	-0.00232279	-0.00690594	-0.000111615	0.0119434	0.0189046	-0.0064002	0.0180642	0.00696079	-0.00435218	0
21	0.00963814	-0.0179054	-0.0159938	0.0229592	0.0222028	0.00510066	-0.0269633	-0.0314387	0.0142036	0.00329737	0
21.2	0.0181467	-0.0626434	-0.0239186	0.0231343	0.00241329	0.0490774	0.0209216	-0.0531346	0.00519246	-0.0206123	0
21.4	0.0182438	0.00486201	0.0198204	0.0534892	0.011137	0.0107384	0.00120068	0.0239682	-0.0310334	-0.0259023	0
21.6	-0.00957442	-0.0104824	0.00317157	0.00504493	0.0119118	0.00299614	-0.00884101	-0.00508461	-0.00929691	-0.0180521	0
21.8	-0.0171776	-0.0417429	0.00656023	-0.0274117	0.00502318	-0.0226463	0.0183596	-0.026357	0.00573858	-0.00129967	0
22	0.0104179	-0.0331913	0.016543	0.00336917	-0.000854975	-0.0525984	0.00100305	0.0340871	0.00836047	-0.0201038	0
22.2	0.0129463	0.00406574	0.034327	0.0195534	-0.00618358	-0.00708551	-0.0169667	0.0291855	0.0327846	-0.00376805	0
22.4	-0.0169842	0.0413195	0.0609227	-0.0262697	-0.00860822	0.0475008	0.0340921	-0.0441888	0.0266619	0.0735946	0
22.6	-0.00494988	0.0237964	-0.0217483	-0.0697205	-0.00685796	-0.00451995	0.0391128	0.00977697	-0.0362232	0.0291058	0
22.8	-0.0130776	0.0407867	-0.0523885	-0.0292643	0.000880329	-0.00326244	0.028605	-0.00972434	-0.0129684	-0.0272253	0
23	-0.0191826	0.0328188	-0.0723766	0.00932802	0.0153463	0.00627111	-0.00706865	0.0405897	-0.00719759	-0.0349267	0
23.2	-0.0123557	0.00855229	-0.0587588	-0.0101909	-0.0233478	-0.0184657	-0.0264376	-0.014124	0.00181305	0.00962488	0
23.4	-0.00451263	0.000403515	-0.00896829	-0.0312495	-0.031077	-0.00689468	-0.00561141	-0.0278475	0.00680226	0.025586	0
23.6	0.0176417	0.0239762	0.0181091	-0.0114487	0.019377	0.0286558	0.00905592	0.0539421	-0.013123	0.0111025	0
23.8	0.037209	0.0499889	0.0116253	0.00586065	0.0138716	0.00848127	0.0055904	-0.00352915	0.00659298	0.0329901	0
24	-0.00869211	-0.00531268	0.0233703	0.00908709	0.00871912	0.00323361	0.0334262	0.0459777	0.0421314	0.00901695	0
24.2	0.0127648	-0.0459115	0.0558862	0.0439002	0.00590747	-0.0479759	-0.0271837	-0.0508282	-0.00944169	-0.0170757	0
24.4	0.0184606	-0.0572454	-0.0115825	0.00842926	0.0168348	0.00517705	0.00954487	0.0435917	-0.00433967	-0.0284027	0
24.6	-0.00170328	-0.0358868	-0.0500369	-0.0073432	0.0065399	0.0212735	0.0156304	0.0571204	0.0251387	-0.0198049	0
24.8	-0.0119458	-0.0428853	-0.00943933	0.0117435	-0.00194715	-0.023766	-0.00174565	-0.0558537	0.0107539	-0.0046273	0
25	-0.0191104	-0.0359946	0.0303102	-0.0187211	0.022052	-0.0037373	0.0533893	-0.00469317	0.0106035	0.0168631	0
25.2	-0.0142461	0.0768489	0.0668341	-0.0267248	0.0156575	0.00581039	0.00979932	0.0231185	0.0361875	0.0428523	0
25.4	0.0066303	0.0178002	0.00445223	0.0226382	-0.0195936	0.0158927	-0.017435	-0.0280876	0.00292284	0.00420191	0
25.6	-0.00822413	-0.0272149	0.00209744	0.0294927	-0.0151793	0.00369964	-0.0250298	-0.0283584	-0.00484729	0.016038	0
25.8	-0.0178664	-0.014222	0.00466149	0.00404614	-0.0381903	0.00305868	0.00783726	-0.0384994	0.00920199	-0.00736428	0
26	-0.0129856	-0.00776398	-0.017739	0.0142283	-0.0311052	0.00805932	-0.0484182	-0.0504272	-0.019478	-0.0380198	0
26.2	-0.00434192	0.0153162	-0.0179271	0.00713811	0.00524206	0.0181762	-0.0663086	-0.0145559	-0.0186673	-0.0218281	0
26.4	0.00794222	0.0495192	0.00171948	-0.0478564	-0.00212843	0.0156225	0.0592436	0.0245363	0.046807	-0.02088	0
26.6	0.00441148	-0.0180707	0.0149242	-0.0108493	0.0312781	-0.0469616	-0.0443433	0.025658	0.00111509	-0.0291946	0
26.8	0.0256153	-0.069161	0.0129868	0.022053	0.00791837	-0.00139601	-0.0488001	0.00687148	-0.0379018	-0.0017053	0
27	0.0311137	-0.0633003	-0.0240299	0.0105589	0.00253938	0.00439032	0.0327341	0.0197037	-0.0317777	0.0117676	0
27.2	0.0444865	-0.0116737	-0.0255293	0.0389886	-0.00537787	-0.0036055	0.0407165	0.019517	0.0112918	-0.0222367	0
27.4	0.0352849	0.0231701	0.0307793	0.061095	-0.0031937	0.01081	0.000264029	0.0089179	0.0197601	-0.0169505	0
27.6	0.00469216	0.046023	0.047951	0.0413862	0.0058473	0.000199893	0.00161694	0.0283216	-0.0163133	0.0264111	0
27.8	0.0166967	0.0697805	-0.0131195	0.047254	-0.0262239	-0.0160139	0.0255485	0.0255912	-0.0152345	0.00633998	0
28	-0.00836643	-0.0289971	-0.0273768	-0.00560609	-0.000230701	0.000176206	0.0410314	-0.0410079	0.00486631	0.0153555	0
28.2	-0.0293228	-0.0142736	-0.0359668	-0.0281823	-0.00032499	-0.00358086	0.00258821	-0.00607831	0.0413374	0.0181877	0
28.4	-0.0142379	0.0356307	0.000814104	-0.021416	0.0110961	0.00968563	-0.0161316	-0.012568	-0.000355216	0.00918016	0
28.6	-0.00471842	0.00826315	0.0166945	-0.0365191	0.0272935	-0.00107587	-0.026225	0.00801968	-0.0176683	0.00134385	0
28.8	-0.0415229	0.0124743	-0.01978	-0.0568743	0.0114351	0.000203989	-0.0559264	0.0314308	0.0223537	-0.0210905	0
29	-0.0737725	0.0509248	-0.0422559	-0.0453968	-0.00888039	0.0269899	-0.041291	-0.0344923	0.00943156	-0.0241998	0
29.2	-0.038788	-0.029724	-0.0511202	-0.0451541	-0.0127326	-0.0286763	0.0306309	-0.0285442	-0.0390248	0.0245396	0
29.4	-0.0214313	0.0278702	-0.062913	-0.0812932	-0.0469648	-0.00274143	0.010589	-0.0236233	-0.0552606	-0.0246431	0
29.6	0.0112866	-0.0187293	0.0202271	-0.0169314	0.0126867	0.00778638	0.0186645	-0.0191767	-0.0312104	0.0273649	0
29.8	0.0140922	-0.0383974	0.0191568	0.0485292	0.0224094	0.0201171	0.0387653	0.00881375	-0.0327345	0.0438147	0
30	0.00772424	-0.00887533	0.0280114	0.0381225	0.000167418	0.0247407	0.00959126	0.025357	-0.00706695	-0.0271882	0
30.2	0.00938374	-0.0357441	0.0495814	0.0104401	0.00961592	0.00697364	-0.0446951	0.0128727	0.0470167	-0.0256851	0
30.4	0.00186068	-0.0468692	-0.0241825	0.0164985	-0.0139294	-0.00200455	-0.0521925	0.00891713	0.0344579	0.0401105	0
30.6	0.0437904	0.00581016	0.0736827	0.0323424	-0.0032683	-0.0214274	0.00668989	0.0159966	0.0125754	-0.00378102	0
30.8	0.0508667	0.00798226	0.00533912	0.019376	0.0452255	0.0135912	0.0297547	0.00695	0.0148557	0.0170055	0
31	0.0153362	0.0356748	0.0400862	0.0340928	0.0290744	0.0358684	0.0046039	0.0147422	-0.0196013	0.0184299	0
31.2	0.0015928	0.0681814	0.0577949	-0.00252757	-0.0128767	0.000929876	0.0304736	0.0198404	-0.0203507	-0.0197204	0
31.4	0.0037029	0.0217837	-0.00459892	-0.0154711	-0.00419598	-0.0425651	0.0423533	0.00612668	0.0332706	-0.0257381	0
31.6	0.000185439	-0.0225097	-0.00676889	0.011926	0.00011789	-0.0261598	0.0126196	0.00229043	0.0329054	0.00421745	0
31.8	0.0206836	0.036028	-0.0151362	-0.0695815	-0.0433915	0.0179271	0.0388655	0.0184441	-0.0221017	0.00868646	0
32	0.0220681	0.003459	-0.0517724	-0.0436408	0.00153497	-0.0165646	-0.0342679	0.0207576	0.0240264	-0.0118647	0
32.2	-0.02198	-0.0652433	-0.00817955	0.0380465	-0.00207447	-0.015243	-0.0277246	0.0202347	0.00469701	-0.0110306	0
32.4	-0.0427355	0.0093901	-0.0188052	0.0418114	-0.0352574	0.0114172	-0.000186047	-0.000585473	-0.00317257	-0.0305305	0
32.6	-0.0416566	0.0543602	-0.0238177	-0.0396363	-0.016522	0.00406311	-0.0325741	-0.0164971	-0.0144762	-0.00870759	0
32.8	-0.0197319	-0.0110079	0.0062479	-0.0403415	0.0152514	-0.0108748	-0.0395818	-0.0305429	-0.0250169	0.0262209	0
33	0.0192766	-0.0228731	0.013744	0.0362663	0.0133856	0.00651614	0.0194942	-0.0469067	0.0104007	0.0016118	0
33.2	0.00280554	-0.00775883	0.0662109	-0.0189052	0.0337746	0.0147772	0.0205692	-0.0161149	-0.00109554	0.00617391	0
33.4	-0.0166269	-0.0274567	0.0114345	0.0389923	0.0237558	0.00812183	-0.0045989	-0.0100489	0.00480151	-0.013427	0
33.6	-0.00839202	0.0168326	-0.0191538	0.0686901	0.0101551	0.00853879	-0.0208097	-0.0156293	0.013079	0.010739	0
33.8	0.0185684	0.0585693	-0.00421932	0.0389623	-0.00185787	0.00959798	-0.0317998	0.0139323	0.00530784	0.0207683	0
34	0.0369579	0.0436357	0.0115946	0.00369977	0.00317098	-0.00458279	0.0201003	0.0072731	0.00803846	0.00967157	0
34.2	0.027014	0.0214929	0.0134194	-0.00424121	0.00743597	0.000746787	0.0775066	-0.00140705	0.0207345	0.00714616	0
34.4	0.0049684	0.0119009	-0.00174321	-0.016215	-0.0105269	0.0305272	0.0447019	0.052595	0.0130466	0.00135692	0
34.6	0.00825587	-0.0244676	-0.0106215	-0.0820642	0.00476852	-0.00405182	0.0456612	-0.00934527	0.0149728	0.0175489	0
34.8	0.00996637	-0.0411347	0.0186463	0.0208742	-0.0262669	-0.0109886	-0.0611783	0.0273472	0.0362865	-0.00457753	0
35	-0.0158384	-0.0166416	-0.013949	0.0323664	-0.0139749	-0.0201797	-0.0850709	-0.00497872	-0.00461079	0.00538616	0
35.2	-0.03659	-0.0279074	-0.0668606	-0.0177035	0.00798491	-0.00254597	0.0156036	0.00098629	-0.0139299	-0.00705416	0
35.4	-0.0169071	-0.0595688	-0.0468942	-0.0179602	-0.00794517	-0.00175166	0.0559986	0.0220636	-0.00799965	-0.0345607	0
35.6	-0.00729716	-0.0170109	0.0162291	-0.0178404	-0.00841106	-0.0362454	-0.0129462	-0.0232712	-0.0462146	-0.00657658	0
35.8	-0.0498761	0.0437437	0.0550383	-0.00819093	0.0152263	-0.00857498	-0.039083	0.0234439	-0.0328046	0.0138476	0
36	-0.0158983	-0.0195692	0.0974917	0.0433308	-0.0112101	-0.0120477	-0.0296556	-0.00772947	-0.0288846	-0.0117299	0
36.2	0.0492539	-0.0154246	0.0349276	0.0265114	0.00946263	-0.000339564	-0.0133773	-0.0142609	-0.00682848	0.0211472	0
36.4	0.0334049	-0.0274913	-0.0277072	0.00631854	-0.0160465	0.00255478	0.0130277	3.96382e-05	0.00294886	0.00792403	0
36.6	0.0154947	0.00675115	-0.00334631	0.000343147	-0.0252017	0.0129273	0.0566444	-0.0043964	0.0237033	-0.0391045	0
36.8	0.034337	0.0696095	0.0120294	-0.0111802	0.00905186	0.0225259	0.0735407	-0.0221483	0.0299085	-0.0313014	0
37	0.0194	0.0270219	-0.0445932	-0.000640095	-0.00957369	-0.0105462	0.0191588	-0.0237046	-0.00971913	0.00868718	0
37.2	0.016122	0.0259047	-0.0431542	0.0176604	-0.019496	-0.0231828	-0.028166	0.00733803	0.0114373	0.0230834	0
37.4	0.0147526	0.0493767	0.016482	0.00312674	-0.00485812	0.0244205	0.0359106	0.0172419	0.0497085	0.00491521	0
37.6	-0.016045	-0.0793808	0.00918312	0.00113	0.0478235	0.00339607	-0.0500087	-0.000996905	0.0416976	-0.00880111	0
37.8	-0.018638	-0.0430628	-0.00735659	-0.0226004	0.0249249	0.000402324	-0.0402239	-0.00444971	-0.0281254	-0.0066964	0
38	-0.0126686	0.0502442	-0.00926336	-0.0396396	-0.0162237	0.00821032	-0.000302544	-0.00891297	-0.0450976	-0.00096363	0
38.2	-0.0363611	-0.015481	-0.00832893	0.00560806	0.00292969	-0.00821453	-0.0528601	-0.010462	-0.0103166	0.00124886	0
38.4	-0.0404403	-0.0143466	0.0262717	0.0396063	0.00118716	0.00794081	0.0144116	0.00215537	-0.0343955	0.00572815	0
38.6	-0.0202411	-0.00525091	0.0198297	-0.0161435	-0.000261186	-0.0279295	0.00294813	-0.0586282	-0.00795927	0.0114126	0
38.8	-0.00239399	-0.0382673	-0.0439127	-0.0150486	-0.0119527	0.0130888	-0.0445684	-0.0331842	-0.0266483	-0.00246773	0
39	0.0227048	0.0296877	-0.0899324	-0.027023	-0.0125774	0.0369393	0.0089115	-0.0241724	0.0015818	0.00808033	0
39.2	0.0218514	0.0236742	-0.0607778	-0.0288057	0.0169637	-0.0120209	0.0279605	0.00919467	0.0056626	0.00614828	0
39.4	-0.00931459	-0.0408162	-0.0158254	0.0103372	0.0142001	-0.0307704	0.0234043	0.047755	-0.0262367	-0.00306488	0
39.6	-0.0130253	0.0107678	0.00324291	0.00751414	-0.0204362	-0.000751423	0.0577404	0.0142359	-0.00662168	0.00202344	0
39.8	0.0217285	0.0146017	0.0381203	-0.0304415	0.00136864	-0.0233719	-0.0188788	0.00971704	0.00882272	-0.02082	0
40	0.0196908	-0.0435623	0.0134152	0.0467817	-0.0245773	0.0078053	-0.0278882	0.0187051	0.0134086	0.0133821	0
40.2	0.00939151	0.0451181	0.0271254	0.0292698	0.0141448	0.00555084	-0.0414843	0.0344686	0.0463214	0.0624594	0
40.4	-0.0162726	0.0121362	0.0160696	-0.0169435	0.0122788	-0.00612395	-0.0271335	0.0332549	0.00422882	-0.0123934	0
40.6	-0.0195985	-0.0142282	0.0506913	-0.0305744	-0.00361692	0.00457272	-0.00525646	-0.0239791	-0.00853895	-0.0485807	0
40.8	0.00925078	0.0527393	0.0959682	-0.0052128	0.0269089	0.0164179	0.0125286	-0.0387408	0.0624015	0.0075082	0
41	0.0123149	-0.00762519	0.00487752	0.0487138	0.0199985	0.0215757	0.0456422	0.0369301	0.064867	-0.0118043	0
41.2	-0.00122653	-0.0284637	-0.0425127	0.0211326	-0.0118743	0.0226324	0.0282772	0.0129905	0.00436234	-0.00928484	0
41.4	0.020605	-0.0281603	0.0281532	-0.00267585	0.0218385	-0.0113865	0.0635069	0.0306067	-0.0403398	0.0119225	0
41.6	0.0178374	-0.0130393	0.0147144	-0.0260971	-0.0112797	-0.0287293	0.0399259	0.0228682	-0.0221424	-0.00947439	0
41.8	0.028728	0.00349347	-0.013358	-0.029957	-0.0274546	0.0245085	0.0123202	0.00866001	-0.00328104	-0.000370992	0
42	0.00171083	0.0038097	-0.0124358	0.0372288	-0.00757865	0.0188622	-0.000740295	-0.000305643	-0.00412522	0.0058355	0
42.2	-0.0512379	0.00861576	-0.0151935	0.0686842	-0.0136964	-0.0490855	-0.0302706	-0.0259365	-0.00750015	-0.0147948	0
42.4	0.00520521	0.0308086	0.00474494	-0.0271589	-0.00020172	0.00783552	-0.00947125	-0.0339129	-0.024481	0.0249327	0
42.6	0.0295825	0.0119445	-0.0301873	-0.00857177	0.00834157	0.0368321	0.0401428	-0.0226451	-0.0202249	0.0107042	0
42.8	0.000915221	-0.00163476	0.0104666	-0.0514346	0.00902753	-0.0332391	0.0138663	-0.000251707	0.000412927	-0.042673	0
43	-0.0200829	0.0352736	-0.0256914	-0.0398039	-0.0176084	-0.0344257	-0.0828702	-0.0131975	0.0338382	-0.00190459	0
43.2	-0.0123377	-0.011748	-0.0637581	0.0125198	-0.0099109	-0.0199023	-0.0574056	-0.0459137	0.0292269	0.0151665	0
43.4	-0.0169465	-0.0792495	0.00237003	-0.0162497	0.0144099	-0.0155197	0.0128154	0.0007301	-0.0091372	-0.0141215	0
43.6	-0.0323545	-0.0273465	0.0528695	-0.0607595	0.00250257	0.0290548	-0.0274811	0.0681207	-0.00591936	0.0180149	0
43.8	-0.00608042	-0.00746396	0.00505955	0.00263955	0.00797736	0.00820639	0.0049831	-0.00325758	0.0284146	0.0248117	0
44	-0.00165285	0.00626583	-0.0363222	0.0387203	-0.0166012	-0.0068305	0.034078	0.0343603	-0.00529601	0.0127672	0
44.2	0.0146403	0.0400877	-0.00981089	0.0360588	0.0110985	0.00734128	-0.00701601	0.0320997	0.0155343	-0.00175925	0
44.4	0.00682731	0.0310409	0.0447258	0.0387685	0.00241275	0.00466222	0.000319443	-0.00943311	0.0210773	-0.0223896	0
44.6	-0.00562752	0.003508	0.0213335	0.00338739	-0.00608983	0.0161624	0.00353206	-0.0253991	-0.0136788	-0.0126203	0
44.8	-0.00502235	-0.00431079	-0.0258544	-0.00804316	0.0192475	0.0255865	-0.0496478	-0.0226685	-0.0402736	0.00159516	0
45	-0.00973636	-0.000651415	0.00314072	0.0554931	0.00299415	-0.0173791	-0.0487605	-0.0184939	-0.0569879	-0.0187837	0
45.2	0.0216009	0.0276973	-0.0176564	-0.00757226	0.0100543	-0.00213028	-0.00709807	-0.00387503	-0.0351283	0.00966828	0
45.4	0.00844392	-0.0498995	0.00980333	0.00349346	0.00181594	0.0363618	0.0301419	0.0247858	0.0197248	-0.00840916	0
45.6	0.0295452	-0.0329409	-0.00157187	0.00119831	0.0321398	0.0217063	-0.0103687	-0.0283091	0.0234467	0.00708525	0
45.8	0.0138917	-0.00274754	0.0165455	-0.0316334	0.0355545	-0.0153612	-0.0323051	-0.0208911	0.00852529	-0.0010436	0
46	-0.0107358	-0.0116054	0.0122084	-0.016308	-0.0172922	-0.0380239	-0.00422749	-0.00604408	0.0114347	-0.0130758	0
46.2	-0.00183051	-0.00920074	-0.0497156	0.0070157	-0.0584419	-0.0437062	0.0171688	-0.0564267	-0.0164119	0.0194006	0
46.4	-0.03951	-0.0247264	-0.0167736	-0.0268903	-0.0502482	-0.0306905	0.032329	-0.0034216	-0.0523093	0.00367316	0
46.6	0.00495781	0.0397663	-0.0184991	0.00897681	-0.00206101	-0.0257255	0.0138502	0.0104267	0.0296411	-0.0134944	0
46.8	-0.00819699	-0.014115	0.00936321	0.00908042	-0.00909932	0.0127693	0.0268546	0.0346628	0.003718	-0.00635682	0
47	-0.00575861	0.0215345	0.007861	-0.0154081	-0.016429	0.02467	-0.00154502	-0.00493619	-0.0563738	-0.00445396	0
47.2	-0.00830521	0.0688007	-0.0292476	-0.0158775	-0.0172156	0.00164168	-0.0123603	-0.0385652	-0.00734722	-0.00211595	0
47.4	-0.024838	0.0160474	-0.0220551	0.0015412	-0.0151737	-0.00549911	-0.00258181	0.0036266	0.0343743	0.0103024	0
47.6	0.00260981	-0.0411395	0.00449307	-0.000369475	0.0130509	0.0174861	0.00266961	0.0533293	-0.0135356	0.00877832	0
47.8	0.00335985	-0.0924587	-0.0342351	-0.0209785	0.0312701	0.0319686	0.0679419	0.059654	0.0239394	-0.0113968	0
48	-0.00931934	0.0215	0.0174855	0.0123261	0.0378703	-0.000739942	-0.0889579	-0.0191693	-0.00111548	-0.0141775	0
48.2	-0.0186279	0.107137	0.0592051	0.0262456	0.00239636	-0.0163373	-0.0548478	-0.0472293	-0.0331284	-0.00498079	0
48.4	-0.00235386	0.0211267	-0.00510724	0.00223037	0.0233187	-0.0144252	0.0137045	-0.0236767	-0.0167057	0.0136613	0
48.6	0.0117858	-0.0297126	-0.0640132	0.00843699	0.0210098	0.00312496	0.0100409	-0.0334172	0.0112673	0.0182012	0
48.8	0.0202929	0.0222323	-0.00776076	0.00589498	-0.0341071	0.0178257	0.010934	-0.0274532	0.00443294	0.00515901	0
49	0.0337106	-0.011568	0.0647909	-0.0491937	-0.00542677	-0.00702376	-0.032372	0.0244951	-0.0127125	-0.00330892	0
49.2	-0.00776088	-0.0187809	0.0370112	0.000697771	0.00404561	-0.0132977	-0.0215823	-0.0337676	0.0116968	-0.0208701	0
49.4	0.0120409	-0.0329117	0.0266507	-0.0131041	0.00218166	0.0335375	0.0293005	0.0555055	0.025413	-0.00870989	0
49.6	0.0102771	-0.031808	0.0289389	-0.00262064	-0.00879581	0.0105129	0.0771582	0.064424	0.0209845	0.00615718	0
49.8	-0.00463816	-0.0234973	0.0086102	0.00961659	-0.0225117	-0.000199449	0.027788	0.0106428	-0.0053913	0.0193277	0
50	0.0113553	-0.00861532	0.0025304	0.00808496	-0.013569	0.0209908	-0.0218898	0.000847159	0.00689504	0.0209657	0
50.2	0.0210583	0.0166463	0.0283536	0.0325331	0.0225263	0.00618304	0.0136897	0.00363241	0.0360063	0.000610992	0
50.4	0.001422	0.0265798	0.0237373	0.0371976	0.0379282	0.016905	0.00814805	0.0165309	-0.0201562	-0.00823351	0
50.6	0.00301903	0.0375641	-0.014978	0.0401683	-0.00177366	0.0163924	0.0399797	0.0126755	0.00640234	0.00925739	0
50.8	0.0306455	-0.000951406	-0.0419358	0.0105156	-0.00506841	-0.0222654	0.0192804	0.0490858	0.0231473	0.0310132	0
51	0.0103516	-0.00133406	-0.0310178	-0.00541375	-0.0119915	-0.0148222	-0.0268872	-0.00982279	0.0544465	0.00474229	0
51.2	-0.0174922	0.00789533	-0.00200824	0.00616848	-0.0105928	0.00611014	-0.0386595	-0.0238859	0.0295177	-0.00571382	0
51.4	-0.0160741	0.033179	0.0100138	0.00737204	0.00946628	-0.00207692	-0.0242285	0.0242509	-0.0252034	0.015149	0
51.6	-0.0219043	0.0862143	0.0221368	-0.0153519	0.010314	-0.000976942	0.00466863	-0.0143078	0.00279963	-0.00448438	0
51.8	-0.0140549	-0.00202368	0.055965	-0.0287368	0.0187264	-0.00143764	0.041518	0.0183607	-0.00217142	-0.0253674	0
52	-0.00981168	-0.0644285	-0.00874006	-0.0107114	0.00609783	0.00358403	-0.0254594	-0.0433262	-0.00324431	-0.0221916	0
52.2	-0.0103774	-0.0573881	-0.0333602	-0.0418832	-0.00804776	-0.0280291	-0.0215346	-0.0371005	0.0217854	-0.0318238	0
52.4	-0.0128904	-0.0163296	-0.0470984	0.0118038	-0.00229442	-0.0007192	-0.0161597	0.0133155	0.00666226	0.00118876	0
52.6	-0.00354608	0.0171744	-0.0543928	0.045889	0.0252021	0.014005	-0.0422998	0.00442002	-0.0494519	0.0485737	0
52.8	0.00131472	0.00365905	-0.00145772	-0.0105667	0.0295378	-0.0269173	-0.0023368	-0.00917308	-0.0374261	0.0272107	0
53	-0.015462	-0.0293906	0.0185291	0.0189492	-0.014566	0.0107037	0.0475539	0.0174615	0.0366122	-0.0114806	0
53.2	0.00057457	0.00664193	-0.0693613	-0.00634154	-0.0264417	0.0156354	-0.0200532	-0.0404128	-0.0210574	0.0143152	0
53.4	-0.00689887	-0.0223603	-0.0189141	0.0241421	-0.0380162	-0.0250886	-0.014255	-0.0500067	-0.043143	-0.0257251	0
53.6	-0.0146094	-0.00424149	0.0116937	-0.0150709	-0.0201374	0.00403153	-0.0386278	-0.0142925	-3.42434e-05	-0.00714033	0
53.8	0.0118518	0.00769484	-0.00708576	-0.0396565	-0.0301679	0.0255918	-0.00674719	-0.0145399	0.0121753	-0.0225479	0
54	0.025223	0.0231866	-0.0150264	-0.0205131	-0.0341861	0.0146484	0.0659544	-0.00834355	-0.0213719	-0.0272629	0
54.2	-0.00716675	0.0398801	-0.0107051	-0.0228213	0.0254311	0.0157115	0.0425522	0.0263091	-0.0216382	0.046361	0
54.4	-0.0144494	-0.0758613	0.0409807	0.0295068	0.0232885	-0.0364257	0.0221281	0.00756756	0.0131705	-0.0208172	0
54.6	0.0179369	0.00146078	0.0675896	0.00468979	-0.0302778	-0.037508	-0.00546646	0.0595625	-0.0200084	-0.0129173	0
54.8	0.018292	0.000212342	-0.0138604	-0.00455147	0.0407634	-0.0177805	-0.0208134	0.0271705	-0.0273957	0.0132979	0
55	0.0178052	0.00493586	0.00432082	-0.0297852	0.0240296	-0.023531	-0.00363842	0.0137077	-0.027032	-0.0145402	0
55.2	0.027313	-0.000679999	0.0362666	-0.0325598	-0.000499721	0.000643258	-0.0187151	0.0281955	0.0132244	-0.0213318	0
55.4	0.0103973	-0.0658801	-0.0234103	0.00342932	0.0304287	0.0299412	-0.00882527	0.0020122	0.0522397	0.0213428	0
55.6	-0.0169597	-0.0695822	-0.0239716	-0.00539408	-0.0405355	0.00019696	0.0494851	-0.0105696	0.0127499	0.0209652	0
55.8	-0.00477663	-0.0333095	0.00302294	-0.0236367	-0.0306273	0.0114444	-0.0528779	-0.00428363	0.0248072	-0.0167634	0
56	-0.00772022	0.0687799	-0.00526346	-0.0190838	0.0347662	-0.0157772	-0.00679391	-0.0448976	-0.001803	0.0149113	0
56.2	-0.0239787	0.0379674	0.0222905	0.0108619	0.0346396	-0.0197046	-0.0042446	-0.0312751	-0.00151071	0.00415334	0
56.4	-0.0105279	0.0167899	0.02045	0.049196	-0.00686224	-0.000905663	-0.018121	-0.00640445	0.0316848	-0.0191403	0
56.6	-0.0120799	0.0200285	-0.0106259	0.0434211	-0.0176454	0.00553794	-0.0132812	-0.00813517	0.0148597	-0.00226671	0
56.8	-0.0262108	0.000620255	0.00729238	0.0111697	-0.00285497	0.00652567	-0.00939415	-0.012732	-0.0257749	0.00574157	0
57	0.010335	0.0702047	0.0279492	0.0168594	0.000280512	0.0176356	0.0461548	-0.0183806	-0.00149153	-0.010626	0
57.2	-0.0200267	0.0278444	-0.0120854	-0.00879808	0.00504943	0.02675	0.0210102	0.0166664	-0.00727582	0.00993683	0
57.4	0.0037627	0.00710202	-0.0159716	0.0170818	0.0185765	-0.00149797	0.06735	0.0143474	0.012306	0.0115584	0
57.6	0.00780676	-0.00739063	-0.0373433	0.0312351	0.0317412	0.000191207	0.0849728	0.0278537	-0.0100958	0.0123692	0
57.8	-0.00941196	-0.0282486	0.0145784	0.0384138	0.0551837	-0.0233036	0.0501562	-0.0146585	0.0153647	-0.00774898	0
58	0.00808794	-0.0608157	0.0523904	0.0463565	0.0566342	-0.0450784	0.0122445	-0.0488135	0.0649456	-0.0179778	0
58.2	0.0267696	-0.0536093	-0.0230956	0.0163204	0.0219886	0.0138382	0.0139814	0.0259954	0.017668	0.0101057	0
58.4	0.015825	0.0606555	0.0198038	0.0109388	0.0210672	0.0371606	0.0779903	0.0260258	0.00139781	-0.00905313	0
58.6	0.0314351	-0.000998256	-0.0119714	0.081123	0.0121415	0.01781	0.00920062	0.000397981	0.0310438	-0.0122886	0
58.8	0.00139189	-0.0557777	-0.016645	0.0221235	-0.017496	-0.0171176	-0.00196317	-0.0391008	-0.00441305	-0.00908396	0
59	0.0118007	0.0112903	0.00478908	0.00402083	0.0161932	0.0027815	0.009016	-0.0179479	-0.0127384	0.0167963	0
59.2	0.0189155	0.0254483	0.0340604	0.0346267	0.0534889	-0.00243319	-0.00773892	0.0062097	0.0343561	0.0241442	0
59.4	-0.00338394	-0.0494796	0.043394	0.000787356	0.0272806	-0.036928	0.00386758	0.00859839	0.0273696	-0.00322404	0
59.6	0.0153472	-0.0537833	-0.0131247	-0.0122108	0.0238164	-0.00400413	0.00471996	0.04944	-0.0332118	0.00439418	0
59.8	-0.0259619	-0.056555	-0.0442206	0.0266847	0.0607351	-0.0205376	-0.0682528	0.0161438	-0.015741	0.0339284	0
60	0.0367501	-0.00514717	-0.00973429	0.0800237	0.045412	0.0161963	0.00645317	-0.0144165	-0.00480691	0.00117573	1
60.2	0.124945	0.0756906	0.0241393	0.108368	0.0610689	0.0833766	0.0199383	0.0526206	0.0324147	0.0225887	1
60.4	0.161379	0.124502	0.0947265	0.126475	0.0521239	0.129975	0.0866955	0.098907	0.0638693	0.014595	1
60.6	0.145108	0.106997	0.131544	0.113861	0.0112556	0.113432	0.174427	0.0567631	0.0362812	-0.0204451	1
60.8	0.116429	0.0637651	0.0704826	0.0532198	0.0158653	0.0520471	0.10654	0.0289223	0.0126834	-0.0037633	1
61	0.123232	0.067136	0.0424679	0.0382995	0.0445434	0.0293195	0.0462115	0.0551236	0.0520053	-0.0117079	1
61.2	0.126412	0.0906798	0.032779	0.118109	0.0768605	0.030091	0.0458218	0.0304642	0.0316269	0.00297417	1
61.4	0.0855754	0.100469	0.00933327	0.0472572	0.0607556	0.00814007	0.0208313	0.0211375	0.0210715	0.0193378	1
61.6	0.0573519	0.0905685	-0.0117225	0.00470701	-0.00863607	-0.00993108	-0.0155342	0.0255505	0.014406	-0.00265594	1
61.8	0.059344	0.0448243	-0.0169351	0.0520653	-0.00209965	-0.000185459	0.0225909	-0.00234906	-0.0100854	-0.0114309	1
62	0.0493267	0.0664765	0.0335331	0.0783271	0.0438536	0.00305649	0.0599267	-0.00195846	-0.0127181	0.0127636	1
62.2	0.0307056	0.147678	0.0745571	0.056077	0.00169512	-0.0207591	0.0286411	0.0572865	0.00678685	0.0158732	1
62.4	0.0415988	0.0469194	-0.0106616	0.0183642	0.000360503	-0.0271388	0.05739	0.0358875	-0.00433506	-0.00248387	1
62.6	0.012471	0.0110205	0.0906126	0.0303574	0.0448756	-0.0295635	-0.00609764	-0.0130967	0.0449544	-0.0241635	1
62.8	0.0134824	-0.00541148	0.106265	0.000392647	0.00696512	-0.0520871	0.0423724	-0.0174694	0.0041453	-0.0274662	1
63	0.00704064	-0.00552445	-0.0134497	0.00610062	-0.00624221	-0.0334557	0.0536896	0.043299	-0.0140402	-0.00917467	0
63.2	-0.0171057	-0.0266702	-0.0499946	0.0373962	-0.000422653	-0.0116158	0.00305409	0.0169093	0.00121735	-0.00321529	0
63.4	-0.0036841	-0.0251668	0.0346724	0.0272283	-0.023268	-0.0123794	-0.0184569	-0.0830057	-0.0138282	-0.017596	0
63.6	0.0326614	0.0778166	0.0569861	0.0237366	0.00871506	0.0027216	-0.051941	-0.0471612	-0.0069177	-0.019745	0
63.8	0.0261694	0.0660597	0.00531366	0.029694	0.0255341	-0.0468684	0.00636128	-0.00800721	-0.0380957	-0.0241971	0
64	0.00982822	0.0287647	0.025998	0.0358363	-0.0124109	-0.0137404	0.0243945	-0.047473	-0.011314	-0.0469738	0
64.2	0.0190753	0.03463	0.018697	-0.011191	-0.0307508	-0.0167667	-0.0055802	-0.0349317	0.0262592	-0.0298246	0
64.4	-0.0209238	-0.00653318	0.0232556	-0.027875	-0.0286926	-0.0501954	0.0123615	-0.0259844	0.00239073	-0.0266945	0
64.6	-0.0544539	-0.0118293	0.0364984	-0.0422011	-0.0175496	-0.0336103	0.00784478	-0.0136769	-0.0098444	-0.0443212	0
64.8	-0.0217961	0.0722236	0.0084394	-0.0733814	-0.0189103	0.00611719	-0.0425024	0.0261315	0.0176005	-0.0267792	0
65	-0.0471547	0.0225844	0.0153562	0.00885081	-0.0624009	0.00978348	0.00794759	-0.0287252	-0.0325688	-0.0125373	0
65.2	-0.0512364	-0.0562507	-0.0227985	-0.00128437	-0.0221013	-0.0141175	-0.0327919	-0.0143952	-0.0603924	-0.0147857	0
65.4	-0.0225841	-0.0112503	-0.0103903	-0.0696692	-0.00707627	0.0184634	-0.0547082	-0.0338159	-0.0206776	0.00212596	0
65.6	-0.0221991	0.0308127	0.0362657	-0.0306048	-0.0109814	-0.00240741	-0.0254706	0.0124429	-0.0070223	0.0035015	0
65.8	-0.0357754	-0.0119661	-0.00764342	0.029009	-0.00731624	-0.0426751	0.00755211	0.0264516	-0.0133855	0.00171832	0
66	-0.0206994	-0.0506433	-0.0759255	0.0207954	-0.00450621	-0.0303485	-0.0152841	-0.0346365	-0.0135392	-0.00196897	0
66.2	-0.00178213	-0.0258288	-0.0542674	0.00942878	-0.0159943	-0.0178306	-0.0355215	-0.0195315	-0.0220375	-0.0286165	0
66.4	-0.0129031	-0.00573824	-0.0677928	-0.0313054	-0.0447809	-0.00986534	0.0719785	-0.00255936	-0.0031395	-0.0166388	0
66.6	-0.0161658	-0.0016006	0.0158669	-0.0289872	-0.0065669	-0.0214499	0.0308545	0.00838906	-0.042637	0.0123012	0
66.8	-0.0183158	-0.00323126	0.0592555	0.0104032	-0.00990157	-0.0132172	0.000980946	0.00327976	-0.00710759	-0.00777696	0
67	-0.0144751	-0.0269253	0.0101218	-0.00270318	-0.0318327	0.00670811	-0.0078357	0.0176852	-0.0119583	-0.0117109	0
67.2	-0.00843678	-0.0307549	-0.022247	-0.0163112	-0.0208743	0.00579969	-0.0454514	0.0278123	-0.00680941	-0.00283627	0
67.4	-0.0113297	0.0137624	-0.00974849	0.0125281	-0.00369602	0.00573694	-0.0284778	-0.0033334	0.0495417	-0.00956067	0
67.6	-0.00410531	0.0236511	-0.00863808	0.0103072	0.00957209	0.0302766	0.0461819	-0.0279805	-0.0112069	0.00979973	0
67.8	0.0278681	-0.0255904	0.0561781	0.0372161	0.0385127	0.0166352	0.0033138	-0.0192067	-0.00318216	-0.00373069	0
68	0.0204905	0.0473496	0.0696839	-0.0059766	0.0204046	0.0135189	-0.0265226	-0.0193701	0.0206461	-0.00252351	0
68.2	0.00737224	0.0489244	-0.00731957	-0.000345921	0.0234538	0.0187358	0.0188611	0.0198406	0.0247258	0.0231603	0
68.4	0.0163026	0.0271566	-0.04032	-0.00480796	0.0306105	0.021306	0.00911628	0.015272	0.0298613	0.000222194	0
68.6	0.00562793	0.0266661	-0.0223112	-0.0378413	0.00130698	0.000600941	-0.0222284	-0.0316864	-0.00620291	-0.0161279	0
68.8	-0.0193234	-0.0222925	-0.0316633	-0.023037	-0.0139657	-0.0322224	0.000720255	-0.00459527	-0.0661715	0.0293303	0
69	0.0131677	-0.0321092	-0.0128455	-0.0278435	0.0128469	-0.0249767	-0.0495718	0.0323108	-0.023525	0.011626	0
69.2	0.0242737	-0.0870673	-0.0353637	0.011711	0.00246117	-0.0282212	-0.0256548	-0.0199324	0.00141336	0.000538451	0
69.4	0.00491127	-0.03833	-0.0300787	0.0436611	-0.00917212	-0.00813578	-0.00259939	0.0525301	0.0103321	0.0018656	0
69.6	0.0191522	0.0636507	0.0557632	0.019026	-0.0266236	0.0121269	-0.00735701	0.0119869	0.0227887	0.0161858	0
69.8	0.0115116	0.0383871	0.0669494	0.0279223	-0.0193372	0.0205224	-0.0143864	-0.0498171	0.00579603	0.0128795	0
70	-0.0163731	-0.0173363	0.0094676	0.02257	0.0195224	0.0279375	0.000236058	0.0137647	-0.0150093	-0.00206105	0
70.2	0.00513261	0.0382615	0.0333347	-0.0559126	0.0237495	0.0176876	0.0255008	0.0218665	-0.00280288	0.00630669	0
70.4	-0.0179728	-0.0312662	0.00112869	0.0186449	-0.0101189	-0.0152526	0.0135433	0.0224831	-0.0257074	-0.00537355	0
70.6	0.0155165	-0.0412685	0.039448	-0.0433837	-0.0227786	-0.0125981	0.0218165	-0.0243428	0.0197538	-0.0166718	0
70.8	0.0049594	-0.0297778	0.00231777	-0.00181509	0.00637159	0.0130034	0.0235186	0.00842529	0.0265233	-0.0224383	0
71	-0.00672098	0.00358525	-0.0317398	0.04937	0.00954165	-0.00597267	0.0413303	-0.00475788	0.00871755	-0.0249832	0
71.2	0.00102386	0.0104257	-0.0025744	0.00997233	0.00272569	-0.0239768	0.0513134	-0.0303258	0.00578512	0.000284995	0
71.4	-0.000877327	-0.00781532	-0.00839085	-0.0102546	0.0156201	-0.00627781	0.00359718	0.00770371	0.0114613	0.0324994	0
71.6	0.0192838	0.0464761	-0.0403871	-0.00347066	-0.00626218	-0.0109305	-0.0473708	-0.0136159	0.0315853	0.0120558	0
71.8	-0.00504132	0.0270601	-0.0131618	0.0224698	-0.0103775	0.033985	-0.0318576	0.0588795	0.00560586	-0.00660502	0
72	0.00960507	0.0511611	-0.0196167	0.0102564	0.000913393	0.0142987	0.00927727	0.00763514	-0.0191466	-0.0154408	0
72.2	0.0126639	0.035608	0.000889286	0.0181484	-0.0114818	-0.00991518	-0.0124342	-0.0536436	-0.00929961	-0.00142727	0
72.4	0.00535593	-0.00142704	0.0365376	0.0219495	-0.000186057	0.0194906	0.00553535	-0.0222701	0.00282469	0.0110683	0
72.6	0.003462	-0.0285759	0.0235405	0.0106281	0.00620374	0.0210119	0.0429961	0.00594092	0.000692126	0.0183198	0
72.8	-0.02101	-0.0420772	0.00140873	-0.00369423	-0.0336743	-0.0165818	-0.0108076	-0.02147	-0.00775836	0.0238281	0
73	-0.038695	0.0352728	0.0060937	-0.059899	-0.00914662	0.0183201	-0.0187948	-0.0122556	-0.0332312	-0.00441537	0
73.2	-0.0210608	0.0288503	-0.0645139	-0.0123362	0.00206894	-0.0251907	-0.00295607	0.0163076	-0.0230014	-0.00530953	0
73.4	0.0006081	0.0398028	-0.0187317	-0.028754	-0.0235664	-0.0125096	-0.0186589	0.0626687	0.0406676	-0.0225539	0
73.6	0.029104	-0.0213855	0.0455358	-0.0264993	0.01492	0.0162544	-0.030643	0.0455875	0.0298382	-0.016221	0
73.8	0.0166856	-0.0638698	0.0183733	-0.0171384	0.038645	0.00622766	-0.0159687	-0.0153694	-0.0166788	-0.00202343	0
74	-0.0117717	0.0133476	-0.0137983	-0.0212736	0.00462051	-0.0149654	0.014085	-0.0295079	-0.00952137	-0.00710396	0
74.2	0.0162344	0.037448	0.0206439	0.0320278	0.00984272	-0.0212353	0.0441812	-0.00678468	-0.00279625	0.000276363	0
74.4	0.0028442	-0.021074	0.0430813	-0.00352192	-0.0260886	0.0175415	0.0356839	-0.0106309	-0.00049069	-0.014377	0
74.6	0.0309871	-0.0210051	0.000470626	0.0560845	0.0380655	0.0215301	0.00440772	-0.0152246	-0.00369145	-0.021534	0
74.8	0.00360824	-0.0121249	-0.0103651	0.0297845	0.0329173	-0.00644806	-0.0134197	-0.0351994	0.0348538	-0.00793582	0
75	-0.0256178	-0.0182503	-0.0315071	-0.0140492	-0.00313266	-0.0333078	-0.00646292	-0.0158448	0.0110723	0.00422596	0
75.2	-0.0202593	-0.00490407	-0.00898141	0.00926398	-0.00191166	-0.0195767	0.0025477	0.024768	-0.0290648	0.000186611	0
75.4	-0.0269119	0.014023	0.0776352	0.0126615	-0.0177939	0.0107147	-0.00237302	0.0266452	0.00802298	0.00830747	0
75.6	-0.0117736	-0.00225659	0.0366188	-0.00625315	-0.0258298	-0.00691899	-0.0244712	0.0240606	0.011916	0.0412587	0
75.8	0.00684623	-0.0226235	-0.0206488	-0.0191927	-0.000901198	-0.00117566	-0.0684475	0.0121265	0.0203764	0.0258327	0
76	-0.0141136	-0.0371698	-0.0253433	-0.00628157	-0.0222876	-0.00265577	0.00465038	0.0268764	-0.0321341	0.00442805	0
76.2	0.00381601	0.0238231	-0.0383254	0.00780829	-0.0177987	0.039314	0.0094752	0.0182162	-0.0384012	-0.0128059	0
76.4	0.0376143	0.0396455	-0.0349545	-0.0201164	-0.0134609	0.00629752	-0.0407565	-0.0188615	0.01929	-0.024643	0
76.6	0.00962246	-0.052717	-0.0263334	-0.0413373	-0.0178432	-0.0489425	-0.00881675	-0.0253187	0.0271925	-0.0232927	0
76.8	-0.0284225	-0.0640062	-0.0564952	-0.0214209	0.0131217	0.0113369	0.0395925	-0.00435156	-0.0192447	-0.0115842	0
77	0.0147427	0.0520615	-0.0272149	-0.029707	-0.000210283	-0.0232238	0.00839953	-0.0150497	-0.00310842	0.00129493	0
77.2	0.0430001	-0.00547174	0.00539187	0.0575957	0.0161497	-0.00683453	-0.0197008	0.00827733	-0.00223015	0.00367683	0
77.4	0.0669082	0.0213986	-0.0160285	-0.0106926	0.00407667	0.00836647	-0.00821338	0.00953049	-0.032076	0.0191848	0
77.6	0.0293538	0.0544141	0.0227917	-0.00514161	0.0201533	0.00742936	0.0126466	0.0081903	-0.02901	0.0167986	0
77.8	-0.0290946	0.0208183	0.0606826	0.0628543	0.045534	0.0155651	0.00638505	-0.0104294	-0.0177551	0.00954318	0
78	-0.0217261	-0.012776	0.00847041	0.0140762	0.0225216	0.0239084	0.0346962	-0.0290036	0.000710002	0.0191146	0
78.2	-0.00502831	-0.0218278	-0.00963686	0.00285856	0.00321304	0.0207888	0.0788796	0.00809939	0.0474443	0.00170309	0
78.4	-0.0367067	0.0768656	0.0253447	0.0155434	-0.0034222	0.0184191	-0.0731356	-0.0066473	-0.0173437	-0.0353034	0
78.6	-0.00496502	-0.0268405	0.0415806	-0.00521426	0.00483184	0.0205931	-0.0291898	0.029755	0.00956981	-0.0102515	0
78.8	0.0058636	-0.0512618	-0.0165934	-0.0412745	-0.013441	0.0102109	-0.000306572	-0.00258376	0.00400327	0.00485036	0
79	-0.0176682	0.0239218	-0.0253016	-0.0193485	-0.00974073	-0.000265427	0.0238161	-0.0195476	0.00819523	-0.0105183	0
79.2	-0.0124852	0.0131932	0.00855272	-0.013653	-0.00047644	-0.0192295	0.0622498	-0.00107327	0.0445762	-0.0205348	0
79.4	0.007495	-0.0319781	-0.0169572	-0.0323511	-0.0244545	-0.0514395	0.00140902	-0.0287005	0.032399	-0.00653548	0
79.6	-0.000379033	0.00554028	-0.0261356	0.0523367	-0.00772083	-0.0422506	-0.0225668	-0.0111426	0.0317058	0.0207307	0
79.8	0.0146411	0.0203651	-0.0216706	-0.0268631	-0.00339892	0.00605121	0.0131989	-0.00580256	0.00702096	0.00262755	0
80	-0.00325124	0.0318439	0.032841	0.00125461	-0.00630083	0.0112557	0.00618542	0.0338773	0.00843076	-0.00632853	0
80.2	0.00518821	0.0124439	0.0401539	0.0132318	0.0350232	0.00108665	-0.00607994	0.0283391	-0.0368278	-0.0136204	0
80.4	0.00668827	-0.000822209	0.00897423	-0.0232939	0.0274734	0.00124967	0.00837272	0.0322068	-0.0603662	0.0174976	0
80.6	-0.0256542	-0.00175278	0.039509	0.0120859	-0.0175979	0.0113302	0.0179705	0.0454741	-0.0117763	0.0495305	0
80.8	-0.0137988	-0.0236537	0.0892265	0.0541097	0.00916917	0.0276672	-0.00594541	-0.0112457	-0.00452472	0.0178622	0
81	0.0144924	0.00732999	0.0230086	0.0210386	-0.00502021	0.00751714	-0.0485302	-0.00325316	-0.0359072	0.0290576	0
81.2	-0.012184	-0.000256067	-0.0552165	0.024442	0.011675	-0.038031	-0.0142203	-0.0386171	-0.0158959	-0.0154888	0
81.4	-0.0253684	-0.0497629	-0.0934937	-0.0209905	0.00214266	-0.0218257	0.0131604	-0.0198766	0.0118828	-0.024817	0
81.6	0.0120754	-0.00366151	-0.0237165	-0.0162277	0.00769629	0.0042223	-0.0231133	0.0129794	0.00859386	-0.00444969	0
81.8	0.0183396	0.0235563	0.0169173	0.0164608	-0.00693407	-0.0171067	-0.0547623	-0.00843743	0.016154	0.00125295	0
82	-0.0139906	-0.0356387	-0.0472434	-0.0211885	-0.0459357	-0.0193151	-0.0197626	-0.0189613	0.0188159	-0.0118931	0
82.2	0.00386866	-0.00832029	-0.0329874	-0.0269044	-0.00120905	0.0258425	0.0216894	0.0125752	-0.0183315	-0.0285704	0
82.4	-0.00350189	-0.0486382	0.00854372	0.00514436	-0.00693331	-0.0125022	0.00662417	-0.0267197	0.0352844	0.00948034	0
82.6	0.022278	0.0148809	0.0427534	-0.0437461	-0.029986	-0.019828	0.0342194	-0.0167769	0.00320241	0.0229105	0
82.8	-0.00391709	0.0384796	0.0222068	-0.0216796	0.00688272	0.0209869	-0.00179299	0.0168438	0.0024	-0.0114747	0
83	-0.0293171	-0.0141546	0.0335128	0.013203	0.00798694	0.0244048	0.00465527	0.0293464	0.00929916	-0.0274547	0
83.2	-0.00975144	-0.0345847	0.0351729	-0.0194039	-0.0202887	0.015994	0.0572903	-0.0155247	-0.0163048	-0.00706962	0
83.4	-0.00578434	0.00784674	-0.0299089	-0.0330494	0.00832671	0.0297892	0.0119951	-0.03717	-0.00287952	0.00440373	0
83.6	-0.0017378	0.0523045	-0.00216355	-0.0192762	0.00765774	-0.0148523	-0.0117247	0.0800077	0.00284785	0.00264506	0
83.8	-0.00100337	0.00325418	-0.0225423	-0.000166415	0.0272459	0.0079365	0.0163216	0.0112351	-0.0161103	-0.00678281	0
84	-0.00239309	-0.0309909	0.00771945	0.0155671	0.0116758	0.00489324	-0.00549311	-0.0291091	-0.00312423	-0.0198629	0
84.2	-0.0135998	0.0170578	0.00605575	0.0529895	-0.0112095	-0.00995275	-0.0503618	-0.0272696	0.0316455	0.0101572	0
84.4	-0.0128783	0.0247189	-0.0411667	0.0191136	-0.0037753	-0.0219109	-0.00164821	-0.0246349	0.0416617	0.0115904	0
84.6	0.0154107	-0.0306191	-0.027263	-0.0277441	0.00310745	-0.0256933	0.0370006	-0.0200842	0.0222889	-0.0181488	0
84.8	0.0291529	-0.00321725	0.0219763	0.0592989	-0.00664923	0.0040921	-0.0382469	-0.0213397	0.0161582	0.0143705	0
85	0.0076993	0.0458908	-0.00349344	0.0669317	0.00929804	0.00966185	0.0263314	0.035981	0.0274931	0.00668443	0
85.2	0.0528176	-0.00779579	0.00233171	0.023253	-0.00587713	0.0082103	-0.0148814	0.0382134	-0.0360972	-0.00909877	0
85.4	0.0309016	0.00144739	-0.0320128	0.015651	-0.0106911	0.00491432	-0.0191815	-0.00386562	-0.0588538	0.00252755	0
85.6	-0.00448876	0.0647888	0.0137792	-0.0117266	-0.0129524	0.00816687	0.0228269	-0.0359561	-0.0220328	0.0092062	0
85.8	-0.00796284	0.0332253	0.0743495	-0.0261468	-0.0150925	0.0104229	-0.0138679	-0.00795444	0.00475758	-0.00308287	0
86	-0.0287025	-0.0237826	0.0274022	-0.020197	0.00528915	0.0086234	-0.0236204	0.0512342	-0.0107768	0.00179261	0
86.2	-0.0301186	0.0213503	0.00703195	-0.0763319	0.024747	0.0168934	0.0779527	0.0440537	-0.0378272	0.0194902	0
86.4	-0.00665957	-0.0737672	-0.0612689	0.00472077	0.0234209	0.00499307	-0.0534794	0.00385531	-0.0103577	-0.0153281	0
86.6	0.0187392	-0.0559464	0.00265961	-0.0121849	0.00977154	-0.022524	0.00998686	-0.00926001	-0.00619332	-0.0237764	0
86.8	-0.00375514	-0.0123421	0.019358	0.0150821	0.0204405	0.00678861	0.00781861	-0.00304662	-0.0109725	0.000981109	0
87	-0.0321306	-0.011572	-0.0256285	0.0207237	-0.00584566	0.022608	0.00104592	0.0117877	-0.000960727	-0.00352172	0
87.2	-0.0229218	-0.0100795	-0.0273788	-0.0272951	-0.0469688	-0.0155499	0.0406598	0.017564	0.0130562	-0.00983114	0
87.4	-0.00509959	-0.0171861	-0.0178545	0.00678756	-0.0135515	-0.0229625	-0.0612821	-0.00173698	0.0190914	0.00855851	0
87.6	0.00210898	-0.0245795	-0.00866614	-0.00574699	0.0119746	-0.00346851	-0.0496457	-0.0173038	0.00836758	-0.0268675	0
87.8	0.0019592	0.00122879	0.0174857	-0.0123071	-0.00478798	-0.011642	0.025708	-0.0204562	-0.0147702	0.0102687	0
88	0.0292132	-0.00149078	0.0256501	0.00405022	0.0109915	0.0188166	0.022939	-0.0138221	-0.0276861	0.033875	0
88.2	0.0348639	0.0156314	0.00986893	-0.0035086	0.0134398	0.00483925	0.00720851	-0.0222939	-0.0208005	0.0187026	0
88.4	0.0220886	0.0156855	0.00504447	-0.00753474	0.001891	-0.0256463	-0.00771671	-0.0192913	-0.000255239	0.0169591	0
88.6	0.0160942	-0.00984555	0.00756047	-0.00851634	0.0132406	-0.0125194	-0.0313946	-0.0123493	-0.0028961	0.0204215	0
88.8	-0.0105858	0.0180188	0.00738254	-0.0192456	-0.00215864	-0.0182266	0.00358333	-0.017604	-0.018915	-0.000205301	0
89	-0.025015	0.00407154	0.0454097	0.078832	-0.0491337	-0.00518755	0.0488694	0.0479739	0.0384422	0.0139024	0
89.2	0.0103576	0.0337535	-0.022091	0.0467452	-0.00438354	0.00518013	0.0996262	-0.0180511	0.0127602	0.0102415	0
89.4	0.000862911	-0.00230896	-0.0309084	-0.0495146	0.00841391	0.0184668	0.043662	-0.0277298	-0.0136185	-0.0202434	0
89.6	-0.0162024	-0.0341018	0.0116658	-0.0473235	0.00645493	0.0180269	-0.0468566	0.031099	0.022151	-0.0256153	0
89.8	-0.0137838	-0.00715005	0.0236673	-0.0193837	0.00998895	0.0233813	-0.0580195	0.0216384	0.046231	-0.000516067	0
90	-0.0129531	0.0149684	0.017736	-0.0528904	-0.00685692	0.0338682	-0.0235977	-0.00396952	0.0181369	0.0157051	0
90.2	0.015	0.0238015	0.000247871	-0.0277658	0.0141628	-0.00120745	-0.0037404	0.0476948	0.0071412	0.0135748	0
90.4	-0.0105684	-0.0200803	0.006642	0.0110883	0.00135525	-0.000417966	0.0233035	-0.00770303	0.0120522	-0.00608136	0
90.6	-0.0336419	0.0377379	-0.000528356	0.0306581	0.00227926	-0.0181316	-0.0362075	-0.0651186	-0.0312979	0.00107386	0
90.8	-0.0155452	0.0280427	-0.00908117	0.0262224	0.00356639	-0.00982485	-0.0591405	-0.0554093	-0.0354706	-0.0157694	0
91	-0.00205872	-0.024251	-0.0565742	0.0322488	-0.00862042	-0.000808513	-0.0364838	-0.007172	0.0114977	-0.0344146	0
91.2	-0.0120772	-0.00576203	-0.0534678	0.009352	-0.00935761	-0.0226042	0.000489286	0.0298065	0.00422485	-0.00641981	0
91.4	-0.00188838	0.0038994	0.0236766	-0.0317991	0.0113309	-0.0276441	0.0539468	0.0262176	-0.0414965	0.0191958	0
91.6	0.016796	-0.00373696	-0.0676535	0.0377068	0.0230475	-0.0172387	0.00463289	-0.00178473	0.0130635	-0.00191985	0
91.8	-0.010517	0.0467829	0.00549592	-0.0343486	-0.000485854	0.00465947	-0.0312424	0.0128666	0.0249995	0.00495934	0
92	0.0274493	0.0205175	-0.0063658	0.0383771	-0.0253795	0.0182253	0.003104	0.0457788	0.0178888	-0.00684727	0
92.2	0.0567194	-0.0213581	-0.027572	0.00832516	-0.00803993	0.0183945	-0.00572401	0.0357254	0.000832325	0.0160488	0
92.4	0.00806031	-0.0116816	0.0148649	-0.0642672	0.0376466	0.00809368	-0.00566719	0.00482982	-0.0159737	0.0404457	0
92.6	-0.0385925	-0.0282495	0.0203458	0.0243245	0.023442	-0.00148494	0.0156988	-0.00183611	-0.0248324	0.00352984	0
92.8	-0.0202235	-0.0679996	0.0302251	0.00828376	-0.045037	0.00116434	-0.0544666	-0.00765644	-0.0289375	-0.0196236	0
93	0.00362678	0.0122647	0.0669925	-0.019529	-0.00272053	0.00291394	0.00764722	-0.0289063	0.0171917	-0.0119473	0
93.2	-0.0135533	0.0396641	0.0166356	-0.00119238	-0.059578	0.010072	0.0559082	-0.0463803	-0.0170899	-0.0167776	0
93.4	-0.0168537	-0.0255299	-0.0179128	0.0186313	0.0045959	0.00806425	0.00640906	-0.00597266	-0.0187908	-0.0283207	0
93.6	-0.00788873	-0.012341	0.00833461	0.00194283	0.0518294	-0.00552134	0.0171513	0.0100747	-0.0220565	0.00431062	0
93.8	0.00179481	0.0153952	0.00891353	-0.0101764	0.0120138	-0.0216388	0.0744431	-0.0228404	-0.0405835	0.019956	0
94	0.0167053	-0.0177413	-0.00130756	0.00577349	0.030441	-0.0193621	0.0391948	0.00301473	0.00152218	-0.00748553	0
94.2	0.0115464	0.0599552	0.062878	0.0022822	-0.0132433	0.00967422	-0.00779725	0.0620527	0.037312	0.0346209	0
94.4	0.0178029	-0.0496356	0.011732	0.0152703	-0.00996463	0.0076927	-0.0642495	-0.0215707	0.0569494	0.00285016	0
94.6	0.00366741	-0.0047252	-0.0283297	-0.01952	-0.0126294	0.0298407	-0.00361789	-0.0417581	0.0241042	-0.0227305	0
94.8	0.00360155	0.0235564	-0.0333163	-0.0045164	-0.000286855	0.032763	0.0492732	-0.00370107	0.0295217	-0.00899441	0
95	0.00324414	0.00262981	-0.0330443	0.0120296	0.0126834	0.00706781	0.0354383	0.00372635	0.0267009	0.000774364	0
95.2	-0.00405966	0.0199074	-0.0159446	-0.0214415	-0.00168686	-0.00430247	0.00564249	-0.0197103	-0.00923777	-0.0124899	0
95.4	0.0313458	0.00780873	0.0216834	0.0181974	-0.0141481	-0.00771208	-0.00759777	-0.0172226	0.00754678	-0.0123857	0
95.6	0.0630774	0.0700963	0.0398658	0.0794251	-0.0248169	-0.0201694	0.0267056	0.0435488	-0.00447606	0.0195212	0
95.8	0.00983144	0.0103668	-0.018091	-0.0584457	-0.0158609	0.00373387	-0.0465994	0.0313384	-0.0319572	0.00274846	0
96	0.00334323	-0.0102627	-0.0196518	-0.0446114	0.00820275	-0.00353322	-0.0544655	0.00995845	-0.0393879	0.00373536	0
96.2	-0.0239825	0.0041429	-0.0282909	-0.00528197	0.00147827	0.0130965	-0.0162272	0.000394555	-0.0233905	0.0200592	0
96.4	-0.0460375	0.0157013	-0.010709	0.0255616	-0.00904799	0.0161536	-0.0303044	-0.00868685	0.0181948	0.0191701	0
96.6	-0.00497407	0.0203739	0.0470579	0.0815693	0.0192465	-0.0235025	-0.0444231	0.00416929	0.0301623	0.0116236	0
96.8	-0.0183613	-0.0417837	-0.016501	-0.0366419	0.0322722	-0.00522328	0.0129758	0.0187102	-0.0273607	-0.000857198	0
97	-0.00219303	-0.0553534	-0.024021	0.00587681	0.00776841	-0.0333893	0.0645783	-0.0103865	-4.87749e-05	-0.0269685	0
97.2	0.00224875	-0.00218061	0.00484985	0.0219155	0.0296941	0.0291764	-0.00396546	0.0483182	0.00806812	-0.0133168	0
97.4	0.00857755	0.0301173	-0.0169419	0.0342476	0.00578802	0.0228643	-0.0159131	0.0263848	0.00142148	0.0081063	0
97.6	0.00207413	0.0130339	-0.0346121	0.0191042	-0.0190838	-0.00565867	0.022995	0.0169938	0.0222389	0.00356893	0
97.8	-0.00461729	-0.00733316	0.00553236	-0.0167471	-0.00286331	0.0129122	0.0328951	0.0243934	0.035744	-0.0227696	0
98	0.0215019	-0.0039003	0.0353494	-0.013781	-0.00952969	0.00634117	0.0317038	-0.0330259	0.017144	-0.0135094	0
98.2	0.0235805	-0.00829052	0.00309671	-0.039893	-0.0061905	0.0221921	-0.00305776	0.0477415	0.0220839	0.0592752	0
98.4	-0.00552155	-0.0297863	-0.0286995	0.00780315	0.0162515	0.00798171	0.00200585	-0.034554	0.0264579	0.0177423	0
98.6	0.0199023	0.0454095	-0.0165747	-0.0227271	0.0137414	0.0204038	0.038068	-0.0390358	-0.0261008	-0.00407379	0
98.8	0.0283905	0.0380663	0.00320139	-0.0174063	-0.000199934	0.00183292	0.0060273	0.0278897	-0.0373897	0.0135256	0
99	-0.00183289	-0.0293245	0.0360985	-0.00377036	-0.00715939	-0.00873083	-0.0247852	-0.0143015	0.0182436	0.0124304	0
99.2	-0.0135594	-0.0203209	0.043413	-0.0443775	-0.00409465	0.0115446	0.0191992	-0.0686323	0.0374943	-0.0126881	0
99.4	-0.0178986	-0.00827017	-0.00328828	-0.0258404	0.00472192	-0.0158629	0.0146547	-0.0123455	0.00481841	-0.0393487	0
99.6	-0.0399124	-0.0146279	0.0391822	-0.0154524	-0.00786053	-0.0121685	-0.0714121	-0.0781264	0.0129669	-0.04309	0
99.8	-0.0228088	-0.0321234	-0.000989177	0.0153571	-0.0159551	-0.00913066	-0.0281375	0.0067043	-0.052322	-0.00190866	0
100	-0.0116304	-0.0129147	0.0116985	-0.0048683	-0.0235717	0.0091054	0.0373762	0.0464086	-0.0515233	-0.00717281	0
100.2	-0.0300369	0.000445078	-0.00900851	-0.00596749	-0.0146885	-0.0125684	-0.0284951	0.00516316	-0.00346562	0.0071949	0
100.4	-0.0033535	0.0269442	-0.0299297	0.0325204	-0.00874839	-0.0320663	-0.0261665	0.00577909	-0.00662063	0.0270312	0
100.6	0.0554458	0.0734226	0.0336616	0.0228163	-0.0122774	0.00305135	0.0556518	0.0342935	-0.0224372	-0.00337794	0
100.8	0.0193075	0.036024	-7.7889e-05	-0.00680117	0.00460129	-0.00502648	-0.0859983	0.0174668	-0.00411834	0.00839359	0
101	-0.0119109	0.00135161	-0.0164794	0.0270723	-0.0251575	-0.0154609	-0.00671443	-0.0164513	-0.0350366	0.000570823	0
101.2	0.0150063	0.00701312	-0.0293702	0.0258713	0.0163047	0.00675002	0.0674357	-0.0240845	-0.0241926	0.00239622	0
101.4	0.0163904	-0.00880735	0.00499127	0.0220796	0.0195897	0.00490772	0.0215028	0.00722374	0.016948	-0.00193515	0
101.6	0.0185268	-0.0242907	0.0379513	0.0506985	0.00476123	0.0160315	-0.00832739	0.0351469	0.0225629	-0.00438277	0
101.8	0.0290626	-0.0178093	0.0390477	0.0258659	0.024255	0.0208897	0.0131463	0.018277	0.00247096	-0.00769511	0
102	-0.00629519	-0.0206296	0.036734	-0.0528679	0.00707599	-0.0296189	0.0131019	-0.0187116	0.019808	-0.013392	0
102.2	-0.00943776	-0.0160147	-0.00866937	-0.0200109	-0.0183953	-0.0127418	0.0212628	-0.00564868	0.0609336	0.0234288	0
102.4	0.0150041	-0.0456918	0.012886	0.00237887	-0.00200888	8.9979e-05	-0.0388669	0.0637438	0.0241685	0.00736888	0
102.6	0.00659913	-0.0532937	0.0535784	0.0239495	-0.0147549	0.00695998	-0.021858	0.0469642	-0.0155297	-0.00943416	0
102.8	-0.00475424	0.0054315	-0.0349554	0.0178465	-0.00336103	0.000149365	-0.0077573	-0.0480492	-0.0110532	-0.0131673	0
103	-0.0132323	0.0332676	-0.107347	-0.0205907	0.0094601	-0.0178958	-0.0182989	-0.0907018	-0.00741436	0.00806723	0
103.2	-0.0211607	0.00269725	-0.0409356	-0.0345361	-0.00469944	-0.00734035	-0.0089629	-0.0443976	-0.00969233	0.0341506	0
103.4	0.000721333	0.0241928	-0.0232477	-0.0116996	0.0208197	0.023529	-0.0231634	0.00784758	0.00702903	0.00616315	0
103.6	0.00425467	0.0327098	-0.0524903	-0.00900716	0.0139619	-0.00348613	0.016138	0.0229568	-0.0269778	-0.0141948	0
103.8	0.00570126	-0.00893902	-0.0151656	-0.0162891	0.00968155	0.00741019	0.0560717	-0.0388541	-0.0131282	0.00572372	0
104	8.53061e-05	0.0301432	0.0537165	0.00721412	0.0102269	0.00157227	0.00530089	0.00572201	0.0175763	-0.000862432	0
104.2	-0.00344489	0.0683621	0.0181191	0.0115234	-0.00291306	-0.00299353	0.0105876	0.0185498	0.0155753	-0.00911262	0
104.4	-0.0119603	0.0527899	-0.036954	-0.00797027	-0.00675966	0.0143845	0.00209695	-0.0234563	-0.011121	-0.00802298	0
104.6	-0.0038332	0.0344054	0.0128111	-0.015519	-0.00123285	0.000972945	-0.0637851	0.044772	-0.0249435	-0.0219347	0
104.8	0.0476898	-0.0215098	0.0357304	-0.0218702	-0.0264038	-0.0218629	0.0579649	0.0804548	-0.0022178	-0.0130091	0
105	0.00858064	-0.0290517	0.0436659	0.0405061	-0.00896673	0.0218052	-0.0302698	-0.0227443	0.0249097	-0.00689455	0
105.2	0.030276	-0.0908599	0.0176629	0.0102677	0.00989128	-0.00600373	-0.00735006	-0.0755217	0.010444	0.0142011	0
105.4	0.00349728	-0.0440095	0.0170329	0.0127703	0.0172099	-0.0366756	0.0807055	-0.0103112	-0.00028297	0.00527186	0
105.6	-0.0191891	0.0149008	0.0179136	0.0574447	0.00638121	0.0104879	0.0119501	0.0518639	-0.00114385	-0.00460649	0
105.8	-2.55736e-05	0.0126785	-0.00935303	0.0442041	0.0098933	0.0364019	-0.0425404	0.00455964	-0.00321773	0.0167649	0
106	-0.0418954	0.0436275	-0.0142863	0.00916923	0.041668	-0.0133299	0.0805299	-0.0398279	-0.00346892	0.0177438	0
106.2	-0.00834039	-0.0406435	0.00124451	-0.0110687	0.00806823	0.00296646	0.0278461	0.0542799	-0.0284695	-0.0116593	0
106.4	0.024616	0.0386274	0.022748	-0.0327797	-0.0225122	-0.00788755	-0.0460912	-0.0462214	0.00307415	-0.0273103	0
106.6	0.00468074	0.0147314	0.018156	-0.0119221	0.00290408	0.00478235	-0.0456662	-0.022989	0.043296	-0.0319667	0
106.8	-0.0357675	-0.037722	-0.000485554	-0.021209	-0.0119053	0.012169	-0.0010791	-0.000595087	0.0032945	-0.0214781	0
107	-0.0352053	-0.00476743	-0.0431035	-0.0241414	-0.0351415	-0.00995957	-0.0169883	-0.0272933	-0.0197239	0.0279627	0
107.2	0.00238867	0.00932056	-0.0729238	0.00378683	-0.00757862	0.0016881	-0.078096	0.0326529	0.0226718	0.0450641	0
107.4	0.00810773	-0.0278234	-0.0177198	-0.0329306	-0.00934893	0.0410142	-0.0329757	0.0465851	-0.000499671	-0.0271137	0
107.6	-0.0202321	-0.0446512	0.0180778	-0.0081656	0.0106163	-0.000635497	0.0509414	0.0199438	-0.00298874	0.0024935	0
107.8	-0.0165233	0.0878746	0.0303932	-0.0149847	0.0097593	0.0178567	-0.00917967	-0.0192354	0.00599883	0.0219573	0
108	0.00850879	0.0430219	0.0666364	-0.0192238	0.00770877	-0.00859434	0.0167106	-0.0216417	-0.0104615	0.0355051	0
108.2	0.0245894	-0.0468041	0.032563	-0.0072623	0.0269506	-0.0199667	0.0398736	-0.00258186	-0.00877948	0.00532306	0
108.4	0.0120794	-0.0223214	-0.0744157	0.0328969	0.0224048	0.00857084	-0.013592	0.0210439	0.0158765	-0.00617894	0
108.6	-0.015643	-0.0109865	-0.0612826	0.0640153	-0.0137497	-0.0148385	-0.00640913	0.0386433	0.0146736	0.0426087	0
108.8	-0.00969678	-0.000793936	0.066174	-0.0105764	-0.0100259	-0.00993967	-0.00787386	0.00950875	0.00718178	-0.0141082	0
109	0.013935	-0.120179	-0.0363794	-0.0033934	-0.0268171	0.000937791	0.0173613	-0.0116883	0.00340068	-0.00965119	0
109.2	0.0160083	-0.0432571	-0.0304177	-0.0195772	-0.0313884	-0.0163244	0.00937368	-0.0310786	-0.0142025	0.00461583	0
109.4	0.0209477	-0.00450738	-0.00609623	0.00683894	0.00815323	-0.0329618	-0.0262192	-0.0207011	-0.0136308	-0.0249381	0
109.6	0.0143711	-0.0173313	-0.0169558	0.0206935	0.0227333	-0.0173861	-0.00219531	0.00681732	-0.00691058	-0.0131956	0
109.8	-0.0121846	0.0419167	0.0395504	-0.0354412	-0.00310622	-0.00429959	0.0272542	-0.00887259	-0.0234198	0.0176895	0
110	-0.0140419	0.0376018	0.0514114	-0.0347374	-0.00592802	-0.0188873	-0.0295083	-0.0331281	-0.0181846	-0.0340853	0
110.2	-0.00499966	0.0431671	-0.0598422	0.00280001	-0.0243554	0.00630154	-0.012352	0.0326206	0.0358059	-0.0315789	0
110.4	-0.0136906	-0.000456086	-0.0151543	0.00905982	-0.0141751	0.0258372	0.0135774	0.000967516	0.000412033	-0.00106681	0
110.6	0.0149195	-0.0206352	0.0351988	-0.00710154	-0.00755905	-0.0191665	0.042646	-0.054769	-0.0076397	0.00650341	0
110.8	0.00112636	0.0127467	0.0104446	0.0143052	-0.00425045	-0.0215313	0.00377555	-0.0248372	0.0122496	0.0113201	0
111	-0.0219296	0.0462551	-0.00356104	0.0200274	0.011762	0.0170669	-0.0689345	0.0242767	-0.00608239	0.00205089	0
111.2	-0.00190326	0.0412294	0.00307966	-0.0173245	0.0119147	0.00155644	-0.0597488	0.011633	-0.0131698	-0.0243375	0
111.4	-0.0365589	0.0179279	-0.0206427	0.00636095	-0.00971784	-0.00931148	0.0158947	4.15995e-05	0.025601	-0.00686333	0
111.6	-0.0184518	0.0051027	0.00160228	0.0242407	0.0210863	0.0256172	0.0694982	0.0220412	-0.0122844	0.0112577	0
111.8	-0.0167558	-0.00164733	0.00763294	0.00255047	0.014862	4.00367e-05	-0.0296094	0.0541633	-0.0204339	-0.00948675	0
112	-0.00577866	0.00762981	-0.0448634	-0.0515104	-0.018943	-0.00296739	-0.0408931	0.0197165	0.0118142	0.00269215	0
112.2	-0.0095801	-0.0229907	-0.0406506	-0.0334364	-0.00619931	0.0096135	-0.00712103	-0.0304283	0.0201019	0.0285353	0
112.4	-0.0177222	-0.0536965	0.0159812	0.00238761	0.0472945	0.00675049	-0.0102177	-0.0427555	-0.00694829	0.014581	0
112.6	0.0117273	-0.00767193	0.00901048	-0.0301773	0.0512472	0.0162333	0.0256592	-0.032645	-0.0124605	-0.00746079	0
112.8	0.00465667	0.00858652	0.0205584	0.0193544	-0.0129815	0.000484031	0.0123895	0.0124236	0.0106623	-0.0023415	0
113	0.0107675	-0.00304214	0.0661415	0.0130085	-0.0179929	0.0149548	0.0588115	0.0159277	-0.0415739	0.00336351	0
113.2	0.0117279	-0.00450464	0.00239944	0.0682283	-0.00888932	0.0146105	0.0227264	0.0263115	0.000509498	0.0118855	0
113.4	0.0163168	-0.00288952	-0.025037	0.0509713	-0.0145201	0.00447133	-0.0439348	0.00383591	0.0373578	0.00579519	0
113.6	0.0177863	0.00061452	0.0034528	-0.00284463	0.00171653	0.0181708	-0.0298976	-0.0154694	-0.00946697	-0.0023511	0
113.8	0.0212678	0.0148992	-0.0123446	0.0019332	0.00205252	0.0175018	0.0127816	0.0101562	-0.0380554	0.0125768	0
114	0.0357077	0.0164761	-0.00590894	-0.0303859	-0.0552002	-0.0190851	0.00838071	0.0202387	0.00180495	0.027432	0
114.2	-0.0043976	-0.0201453	0.029488	-0.0100608	-0.0315832	0.00498014	0.0287938	0.0256086	0.0394188	0.00583394	0
114.4	-0.0171315	-0.0453245	-0.0303431	-0.00439932	0.00868921	-0.0149507	0.0309116	-0.0218458	0.00803643	-0.0292572	0
114.6	-0.0383561	-0.00774885	-0.0325279	-0.0118989	0.0256906	-0.0273847	-0.0108581	-0.0123845	-0.0399634	-0.0192417	0
114.8	-0.010656	-0.0160585	-0.0261852	-0.010552	-0.00846396	-0.0267237	-0.0461072	-0.0137161	0.00080324	-0.00270098	0
115	0.0187237	0.000438676	-0.0177158	-0.00291261	-0.0256354	-0.00995374	-0.00607575	0.000176698	0.0433805	-0.0102986	0
115.2	-0.016499	0.0821946	0.0156098	0.00714035	0.0201323	0.0221423	0.0398013	0.0460663	-0.0173659	-0.0174895	0
115.4	-0.000453266	0.00218866	-0.0482858	0.0271267	0.0160002	0.0054291	-0.0108965	-0.0319661	-0.0418014	-0.0196049	0
115.6	-0.00455132	-0.037472	0.00697657	0.0456271	-0.0267077	0.00228867	0.0320563	0.0161668	0.00889708	-0.00279771	0
115.8	0.00979809	-0.00629905	0.0432962	0.014842	0.0214018	0.0184697	0.0393062	0.0125428	0.0117927	0.0182049	0
116	0.00264001	0.0662073	0.0192419	0.0110862	0.0177524	-0.00721412	0.00199936	0.00234106	-0.0065865	0.0153708	0
116.2	-0.0151381	0.0365368	-0.00482249	0.0330124	-0.0062388	-0.0124729	-0.0243355	0.00988347	-0.0157274	0.00205611	0
116.4	0.00314784	-0.0348703	0.00371621	-0.00675656	0.0163309	0.0189512	-0.0298517	-0.0193512	-0.0166038	-0.00300493	0
116.6	0.0213386	0.0142695	0.00162458	-0.0857654	0.0103345	0.00632758	-0.0193109	-0.0427796	-0.00110722	-0.00634837	0
116.8	-0.00301049	-0.00319367	-0.044726	-0.0718149	0.0225317	-0.00646327	0.00118082	-0.0124941	0.00923889	0.00175498	0
117	0.0185135	-0.043347	0.0102341	-0.00291522	0.022207	-0.0168115	0.00192384	0.00324582	0.0337039	0.0302927	0
117.2	0.0157971	-0.0158264	-0.00711408	0.0291164	0.0245048	0.0282314	-0.0181798	0.00532489	0.0323678	0.00923332	0
117.4	-0.0239084	0.031578	-0.00603547	-0.00284213	0.0158091	0.0063313	-0.0227873	0.0167811	-0.0346664	-0.00980586	0
117.6	-0.00670994	-0.00800697	0.065902	-0.00653292	-0.0242011	-0.0184837	-0.0101565	0.00149989	-0.0356056	-0.00857375	0
117.8	0.0227415	-0.0593749	0.06594	0.00311064	-0.0446539	0.0156694	-0.0132236	-0.0125987	0.0451357	-0.0112806	0
118	-0.0376628	-0.000516036	0.00653348	-0.0502174	-0.000451698	-0.0310994	-0.0365283	0.0293652	0.0234228	0.0100093	0
118.2	-0.00611556	-0.0199979	0.0536292	0.0243913	0.00989782	-0.018816	-0.0368592	0.000602069	0.00508725	0.0229951	0
118.4	-0.0279341	-0.0284804	0.0110964	0.0271224	-0.0194588	0.0219301	0.0308115	0.0394843	-0.000422476	-0.00090837	0
118.6	-0.0233331	-0.029603	-0.0613505	0.00956263	-0.0407753	0.0183431	0.018784	0.0169384	0.00115527	-0.0210423	0
118.8	-0.00190728	0.0246555	-0.0455798	-0.0133596	-0.00159445	0.000878821	0.0335283	-0.0146486	0.0259625	-0.00178309	0
119	-0.0129497	0.0640842	-0.0058241	-0.0246182	0.0270549	-0.00815563	0.0771273	-0.00152282	0.0259757	0.000669867	0
119.2	-0.00851738	-0.01578	-0.0310182	0.0169906	-0.00653643	-0.0130009	0.0125418	-0.0239289	-0.0206902	-0.0170456	0
119.4	0.0206177	-0.0580723	-0.0375039	0.0182274	0.00787247	0.0200057	-0.0140888	-0.0200364	-0.0130045	0.0262258	0
119.6	0.0269972	0.014195	0.0267882	-0.0130336	0.0252758	0.0273383	0.0309196	0.044959	0.0291922	-0.0203891	0
119.8	0.00421987	0.05912	0.0531376	0.0328094	0.0554482	-0.00733895	0.00502101	-0.0149127	0.0226814	-0.0169929	0
120	0.0299792	0.0566198	0.0130415	0.0330352	0.00144733	-0.0145819	-0.0231344	-0.0145656	-0.0404467	0.0104335	0
120.2	0.045194	0.0255631	0.00347626	0.0383027	-0.0374945	0.0143077	-0.00140152	0.0305098	-0.0408721	0.0110883	0
120.4	0.0293372	0.0305477	-0.00144273	0.102869	0.00850149	0.0219717	0.0258811	-0.000901573	0.0495476	0.000827508	0
120.6	0.0577558	0.0696551	-0.0371019	0.106968	0.0124549	-0.001294	0.0230252	-0.014916	0.089038	0.00451683	0
120.8	0.0403464	-0.0204031	0.0705416	0.101866	-0.000773357	0.000324414	-0.0223714	-0.00696016	0.034877	0.0414633	0
121	0.0266513	0.0170167	0.0401694	0.0726094	-0.015843	0.0340863	-0.0192592	0.00216757	0.0135594	-0.00154253	0
121.2	0.0396116	0.0185546	0.00480082	0.0460375	0.0294488	0.0340599	0.0253086	-0.0502368	0.0158468	-0.0182925	0
121.4	0.0564509	-0.0272516	0.0258838	0.0539891	0.0912016	0.0205741	0.011325	-0.0238602	0.000781073	-0.00404004	0
121.6	0.0458183	-0.019041	0.0205096	0.0284755	0.102679	-0.00630851	-0.0490482	4.28123e-05	-0.0118527	0.00387684	0
121.8	0.0408646	0.0245822	-0.00758381	-0.00657234	0.0561059	-0.0383878	-0.0509353	-0.0474425	0.0151088	0.0176091	0
122	0.0787329	0.0225775	0.0113387	0.0525722	-0.000581585	-0.0109233	-0.0153255	0.0156745	0.0444474	0.0172457	0
122.2	0.0498171	-0.0462668	0.0266628	0.00938695	0.0184741	0.00906241	-0.0451489	-0.0231031	0.00082777	-0.0176942	0
122.4	-0.00204442	-0.0240633	-0.00439313	-0.0157798	0.0312786	0.0112208	0.0238594	0.000578218	0.00187601	-0.0125182	0
122.6	0.0215033	-0.0225947	0.0206234	0.0500489	0.015344	0.0210789	-0.0138659	0.0324225	0.00628918	-0.00104942	0
122.8	0.0424038	-0.0502291	0.0589573	0.0492099	0.026296	0.0448399	-0.0181063	0.040212	0.0137612	-0.00728036	0
123	0.0493626	-0.00946422	0.0668228	0.0109939	0.043048	0.0577653	0.0285992	0.0532137	0.00910833	0.0013477	1
123.2	0.103967	0.0695231	0.113468	0.0645765	0.020316	0.0539919	-0.029552	0.0402386	-0.0129885	0.0213705	1
123.4	0.113187	0.0886232	0.14771	0.0628463	0.0192352	0.066786	0.0440223	0.0115492	0.0530027	0.00598529	1
123.6	0.135035	0.0762579	0.0465599	0.10425	0.0158045	0.0772335	0.00598296	0.0591872	0.0680326	0.000989948	1
123.8	0.0707739	0.105389	0.0391285	0.0742757	0.0201502	0.0435281	0.0296318	0.0603169	0.0197715	0.0165179	1
124	0.0672161	0.0752736	0.101906	0.0195819	0.0331029	0.0424708	0.0434247	0.0521413	0.0445382	0.00640334	1
124.2	0.11301	0.0743463	0.0827284	0.0315317	0.014526	0.0301241	0.0199563	0.035058	0.0509714	-0.00805786	1
124.4	0.090626	0.0865667	0.0449604	0.0718564	0.00678896	0.0105738	0.021243	0.000619639	0.0129837	-0.00335694	1
124.6	0.0726216	-0.0377005	0.0825476	0.0582572	0.0447848	0.0587975	0.0204638	0.0141521	0.0652623	-0.0188205	1
124.8	0.0896489	-0.00399573	0.0383062	0.0101738	-0.022488	1.52653e-05	0.0554372	0.0163195	0.0257657	-0.0310316	1
125	0.0596781	0.0320134	0.0700044	0.00950591	-0.044356	-0.00641032	0.0174455	0.0272095	0.0174878	0.00427297	1
125.2	0.0297127	-0.0139896	0.0399648	-0.0181465	0.00609136	-0.00427878	-0.0261603	-0.0102229	0.0192005	0.0190218	1
125.4	0.0253386	-0.012455	0.00387639	-0.0370785	0.0397153	-0.0334837	-0.0610715	-0.0343702	-0.00226293	-0.024728	1
125.6	0.0115675	0.012207	0.0475724	-0.0121794	0.00731946	-0.0338096	-0.0629115	-0.0107334	-0.0183465	-0.0411423	1
125.8	0.000249913	-0.0208554	0.0613641	0.00327981	-0.0306934	-0.0213128	-0.0382572	-0.00166735	-0.00822138	-0.00861265	1
126	0.0233807	-0.00915211	-0.00196242	-0.00215992	-0.013008	-0.0621931	-0.0603674	-0.0130669	-0.00487506	-0.031655	0
126.2	-0.00219057	-0.00742301	0.00321551	-0.00499323	-0.0167229	-0.0272517	-0.00456396	-0.0077804	-0.0407412	-0.0336771	0
126.4	0.0068929	0.0447337	0.00449799	-0.0259948	-0.0148499	-0.032145	-0.00386443	-0.012961	-0.00931102	-0.0137996	0
126.6	-0.00853642	0.046617	0.0261948	0.0123052	-0.0350476	-0.00669434	-0.0444071	-0.00597988	0.00464974	0.0129808	0
126.8	-0.00152361	-0.0269427	0.0608986	0.030977	-0.0358955	0.00597379	-0.0378007	-0.026972	-0.0129036	0.0048388	0
127	0.0253059	-0.0264932	0.0468156	0.0142538	-0.0130609	-0.0310747	0.0310638	-0.0569839	-0.0374476	-0.0227616	0
127.2	-0.00713819	0.0540543	-0.014474	0.0276433	-0.0207658	-0.0278856	0.0570474	-0.0254977	-0.0664891	-0.0185903	0
127.4	0.00361985	-0.0118002	-0.0343885	-0.0298072	-0.0111914	-0.012109	-0.0449866	0.00593392	-0.0276683	-0.0136516	0
127.6	-0.00648811	-0.0793525	0.0585357	0.0166563	-0.0141635	-0.000320659	-0.0517226	0.0400711	-0.0112698	-0.00239214	0
127.8	-0.0171064	-0.0492538	0.0178077	0.0427548	-0.0427673	-0.0325637	-0.0354236	-0.0212053	0.0359869	-0.0281252	0
128	-0.0212431	0.0187197	0.0320799	-0.00757324	-0.0408542	-0.0236963	-0.0350318	-0.0152269	0.0134587	-0.0576938	0
128.2	-0.0193604	0.0157644	0.0750221	-0.0498414	-0.0226762	-0.00933731	-0.0349378	0.0411709	-0.0197215	-0.0389821	0
128.4	-0.00627028	-0.0127965	0.00465288	-0.0323604	-0.0311278	-0.0261829	-0.0420797	0.0136929	-0.00284555	-0.00333276	0
128.6	-0.00518953	0.037131	-0.0157564	-0.00966331	-0.0348393	0.00442559	-0.0402833	-0.0166425	-0.0458835	-0.00674869	0
128.8	-0.0368963	0.0252084	-0.0368021	-0.0281366	-0.0231196	-0.00879482	-0.00684107	-0.0200146	-0.0236298	-0.00891174	0
129	-0.0368821	-0.0527301	-0.00728928	0.000141762	-0.024091	-0.0059042	-0.0345976	-0.0196096	-0.00978821	-0.000541504	0
129.2	-0.00118313	-0.00734298	0.00675241	0.0170161	-0.0166359	-0.0399869	-0.0568764	-0.0340292	0.00699041	-0.00243723	0
129.4	-0.00744717	0.0202892	0.0113389	0.0221	-0.000881691	-0.0316205	0.0306914	-0.034019	0.0110294	-0.0108255	0
129.6	-0.0126622	0.0109708	0.0187436	0.00770108	-0.0051775	-0.0226774	0.0475745	-0.011993	-0.0147768	-0.00547876	0
129.8	0.0220135	0.0778939	-0.0187354	-0.0277652	-0.00705041	-0.0748196	-0.0787398	-0.0051145	-0.0251449	0.00902384	0
130	-0.00572422	0.0531285	-0.0677932	-0.00849188	0.0296399	-0.0292918	-0.0366674	-0.0149338	-0.00775274	0.0033665	0
130.2	0.0218684	0.0164587	-0.0158624	-0.0158411	0.0123201	-0.0258969	0.012528	0.000696573	-0.0258742	-0.0109961	0
130.4	0.0205959	-0.00945904	0.0395822	-0.00235914	0.00292124	0.00584415	0.0438603	-0.0201803	0.0257383	0.0382548	0
130.6	0.00931364	-0.0429453	0.053782	-4.57354e-06	-0.00377322	0.0383744	0.0446949	0.0273796	-0.00537875	-0.0095758	0
130.8	0.0185049	-0.0578813	0.0406677	-0.0278438	0.00918815	0.0215129	0.00821303	0.0432186	-0.0212067	-0.0282868	0
131	-0.000198832	-0.0447482	0.00730384	-0.0362307	0.0255491	-0.0158672	0.00930693	-0.0017704	0.0403324	0.0195411	0
131.2	-0.036314	-0.046189	-0.00962939	0.00327661	2.88561e-05	-0.0125535	0.0487023	0.0214132	0.0132977	-0.0365977	0
131.4	0.00587301	-0.0445348	0.0271223	0.0387538	-0.000578443	0.0304377	-0.0087486	-0.0315684	0.00944472	-0.000895131	0
131.6	0.0066421	0.0382841	-0.0169158	0.016118	-0.00988184	0.00409387	0.0311202	-0.0328058	0.0035244	-0.0131113	0
131.8	-0.007111	0.0250928	-0.00213987	0.0267722	0.0294269	0.0179555	0.00220698	0.0449917	0.00242032	0.0100939	0
132	-0.00243091	-0.0248421	0.0218352	0.00504173	0.0125415	0.00702836	0.00515068	0.0436399	-0.0325112	-0.00799213	0
132.2	-0.000792993	-0.00871486	-0.0188623	-0.0177059	-0.0462622	-0.0157598	-0.00189854	-0.0139254	-0.0422334	-0.021983	0
132.4	-0.00172757	0.0107906	-0.0707832	0.018791	-0.0262842	0.022992	-0.0589588	-0.0160841	-0.00172662	0.0353799	0
132.6	0.0113373	0.00455833	-0.075769	0.0193977	0.00752156	0.0316426	0.0130845	-0.0235339	0.00646757	0.0228103	0
132.8	-0.00582305	0.0598447	-0.00543494	0.0217602	-0.0337712	0.00454662	-0.0455535	-0.0375646	0.0689108	0.0104566	0
133	-0.0139278	0.0312728	0.00818229	-0.0295395	-0.0194959	-0.0177536	-0.0179844	-0.0295897	0.0220352	-0.000827635	0
133.2	-0.0406546	-0.0337257	-0.0025689	-0.0314008	-0.00402427	-0.017135	0.00254954	-0.0159201	-0.00522884	0.00329697	0
133.4	-0.0169394	-0.0152081	-0.00502321	-0.0324738	0.00240717	0.009253	-0.00845744	-0.00558585	0.0268856	-0.00312685	0
133.6	0.0317745	0.00396036	-0.0128166	-0.032056	0.0130216	0.00704979	0.0160408	-0.0100564	-0.00266574	0.00506458	0
133.8	0.00947391	-0.0480946	-0.00688969	0.0282849	0.00469467	-0.0262968	0.0207806	-0.0205355	-0.0591405	0.0270196	0
134	0.00419791	-0.0100007	0.0287461	0.0314908	0.0102172	0.00355135	-0.0343736	0.0192186	0.0043936	-0.0284941	0
134.2	0.0250369	0.0300986	0.0352536	0.0494734	0.0215577	-0.00809207	-0.0198826	0.0713098	0.000947275	-0.0163731	0
134.4	0.0133674	0.0375983	0.0505699	-0.0163162	0.0243657	-0.0241731	0.0492092	-0.00320844	-0.0457101	-0.0251225	0
134.6	-0.0101475	0.016834	0.0163182	-0.0222037	0.00352565	0.0136781	0.0352007	-0.041388	0.00081212	-0.0180055	0
134.8	-0.0129418	-0.0494953	-0.0210626	0.00935351	0.000371433	0.0024763	0.00821895	0.014854	0.0426217	0.0121092	0
135	0.0124125	-0.0725185	-0.0143423	-0.0183741	0.00404682	-0.0210066	0.0214421	0.0263819	-0.000317092	0.0132759	0
135.2	0.0287564	0.0146812	-0.0214045	0.00613069	-0.0233001	0.0462734	-0.0194284	-0.0112347	-0.00596078	0.00735407	0
135.4	-0.0287984	0.0170659	0.00452409	0.0686916	0.00691999	-0.0207193	-0.0183769	0.0240228	0.00611831	0.0160589	0
135.6	-0.0261396	0.0202968	0.0365325	-0.0478154	0.00699868	0.0180383	0.00211154	-0.00350478	-0.000807971	-0.000892007	0
135.8	0.0317725	0.0359817	-0.00374752	-0.0659225	-0.0151271	0.0327696	-0.00812673	0.00562767	0.00588115	0.0135096	0
136	0.012484	-0.00848595	-0.0383675	-0.0185269	0.0070204	0.00830642	-0.0201858	-0.00704765	0.000880791	0.00778198	0
136.2	-0.0286497	-0.0516054	-0.00978542	-0.00436894	0.0267626	-0.00659522	-0.0304891	-0.0161589	-0.00745179	-0.015183	0
136.4	0.00708764	-0.00875248	0.00332155	0.0300503	0.00126219	-0.0225442	-0.0245946	0.0329074	0.00320258	0.0036278	0
136.6	0.0156494	0.0350027	-0.0232226	0.0399766	0.00719223	0.00158292	0.0500313	-0.00207689	-0.00323062	0.0184482	0
136.8	2.12308e-05	0.0361517	0.0316082	0.0130411	0.00858524	0.0419217	0.069695	-0.033921	1.01354e-05	0.0144721	0
137	-0.0102795	0.0330622	0.0623747	-0.011237	-0.0143261	-0.00661283	-0.0271933	0.00350264	-0.0318301	-0.00385437	0
137.2	-0.0217652	-0.0164734	0.0208233	0.00373001	-0.0117401	-0.0121912	-0.0325816	-0.00837258	-0.0191122	-0.00673575	0
137.4	-0.00651765	-0.0399269	0.00703118	-0.00342282	0.00045038	-0.0045009	-0.00434201	-0.0175012	-0.0018575	-0.0070824	0
137.6	0.0207564	0.00466785	0.0148971	-0.018547	-0.0145356	-0.0345028	-0.0230373	0.0196969	0.0151566	-0.0188509	0
137.8	0.00865569	0.0276239	-0.0448806	0.000875649	-0.0209339	-0.0147439	0.00256971	0.00591364	0.0479305	-0.0211952	0
138	-0.0060034	0.0168965	-0.0674328	-0.0315298	0.00201186	0.0216796	0.0106545	-0.0215814	-0.030717	-0.0115	0
138.2	0.00120659	0.0252401	0.00959575	0.0102758	-0.0301496	0.00474443	-0.0101169	0.0179803	-0.0135984	-0.00822888	0
138.4	0.000696471	0.0102205	-0.0117945	0.0317155	0.0123991	0.0212056	-0.0494729	0.0430843	0.00628109	-0.0053998	0
138.6	-0.00135759	-0.0330286	-0.0249142	-0.00712119	0.0301019	-0.0120301	-0.00470583	0.000123912	-0.00200625	0.0136811	0
138.8	0.0127044	-0.0118731	0.0121122	-0.00874289	0.00211598	-0.030097	0.0259802	-0.0630562	0.0109433	0.00549411	0
139	0.0065984	0.0288553	0.0154558	-0.00550969	0.00720984	0.032942	-0.00799332	-0.0345917	0.0295712	-0.0279195	0
139.2	-0.0218921	-0.0235451	0.00833861	-0.0677452	0.00825081	0.037373	0.0489289	0.0708045	-5.01119e-05	-0.0163444	0
139.4	0.0246398	-0.00640208	-0.0120041	0.0208512	-0.000326803	0.0156699	0.0762135	0.0340773	-0.0356462	0.00475972	0
139.6	0.00526809	-0.0281921	0.0114792	0.0602082	-0.021577	-0.00671973	-0.0218221	-0.020216	0.0353285	0.0395062	0
139.8	-0.0101845	-0.00308689	0.0434258	0.00105346	0.0154598	-0.0319733	0.0167103	0.0216462	0.0400737	0.038998	0
140	-0.00249351	-0.00662133	0.026335	-0.0141845	0.000748868	0.0133212	0.0413906	0.0525217	0.00373831	-0.0111173	0
140.2	-0.00976225	-0.0408446	-0.00142842	0.0272446	-0.026273	0.032326	0.025424	-0.00387165	0.0273088	-0.0243272	0
140.4	-0.0171013	0.0103656	0.00329965	0.022756	0.0243117	-0.0347306	0.0711104	-0.0273061	0.0420804	0.0204972	0
140.6	-0.00560399	0.0566532	0.00629352	-0.00497961	0.00240631	-0.00837691	-0.0278573	0.0379313	-0.00450176	0.00897029	0
140.8	0.00930117	0.012007	0.0375305	-0.0161198	0.00421335	-0.0378334	-0.0444371	-0.011985	0.00250791	-0.011468	0
141	0.0244701	0.0168521	-0.00415828	-0.0565186	0.00777543	-0.0329494	-0.0417432	-0.0040757	-0.042657	0.0263234	0
141.2	0.00171594	0.0149156	0.0169184	0.0229436	-0.00870584	0.0194265	-0.0131445	-0.0399715	-0.0580721	0.0126522	0
141.4	-0.00558625	0.040076	0.0102518	0.0467497	-0.030237	0.033914	-0.00242475	-0.0402607	-0.019473	-0.015038	0
141.6	0.00507772	0.0558867	-0.0507406	-0.0379538	-0.0220358	0.00816383	-0.0418654	0.0233228	-0.0101431	0.00213149	0
141.8	-0.0160819	-0.0278254	-0.0200954	0.00176835	-0.00518807	-0.00495534	-0.0547491	-0.0117487	-0.0292514	0.000889622	0
142	0.00888617	-0.0158153	-0.043145	0.0312586	-0.0409469	-0.0258216	-0.0256434	-0.0197865	-0.0164142	-0.00490544	0
142.2	0.000915417	-0.00480621	-0.0175412	0.0427888	-0.00273335	0.0113559	-0.01187	-0.0139769	-0.0133489	-0.0302038	0
142.4	-0.0145403	-0.0345344	0.0116514	-0.0133055	-0.00512757	0.0284227	-0.010216	0.0223672	0.0223949	-0.00538421	0
142.6	0.00495813	-0.0537475	-0.013299	-0.00130901	-0.00207877	0.0211514	0.00195129	0.0144691	0.050452	0.00783068	0
142.8	0.0235331	-0.0498869	-0.0538897	0.0174819	0.0401916	0.0030627	0.0486528	-0.0280081	0.0386029	0.0056713	0
143	0.00333917	-0.0186593	-0.0186158	-0.047426	0.0529434	-0.0140333	0.060451	0.0114257	0.0107565	0.0151204	0
143.2	-0.0143411	0.0162448	0.0666778	-0.0332431	0.0347656	0.00674006	0.00414688	0.0792105	-0.00802649	-0.0158325	0
143.4	0.000670441	-0.0523161	0.0189963	0.0257325	0.0181291	0.0158593	0.0746898	-0.0208344	0.0112977	-0.0236756	0
143.6	-0.00985812	0.0393178	-0.0341486	0.0590252	-0.00445066	-0.0228436	0.0203983	0.0127365	0.00957612	0.00218885	0
143.8	-0.00339788	0.0341134	-0.0337119	0.00736327	-0.032585	-0.0137176	0.00281046	-0.00185203	-0.0116968	0.00241988	0
144	0.016046	0.0362221	0.025891	-0.0519725	-0.0083828	0.00257555	-0.0227763	-0.0142493	-0.0185969	-0.00103166	0
144.2	-0.00422091	0.0302947	0.0697243	-0.0275743	0.0249913	-0.00860087	-0.045351	0.0193579	-0.0122751	0.00965722	0
144.4	-0.0341122	-0.0807945	0.0336514	0.0104372	0.00341133	-0.00570917	0.0297151	-0.00931878	-0.00563314	-0.00136384	0
144.6	-0.0116047	0.0420053	-0.011844	-0.0262536	-0.000765105	-0.0133149	-0.0104255	0.0145523	0.0129321	-0.0205721	0
144.8	-0.0311563	0.0322972	-0.046169	0.0175861	-0.0302017	0.00365758	-0.0570141	0.0146006	0.0178285	-0.00348487	0
145	-0.0100666	0.016118	0.0130236	-0.000109702	-0.0207067	0.0102158	-0.020285	-0.0173464	-0.016354	0.0450788	0
145.2	0.0240737	-0.00694425	0.0275723	0.00157421	0.00967253	0.0125899	-0.0224932	-0.020856	-0.0463742	0.0352735	0
145.4	-0.00819061	-0.0205701	-0.0194181	0.0105953	0.0440561	0.0109028	-0.0500665	-0.0249541	-0.00955893	0.000288693	0
145.6	-0.0259292	0.0265421	-0.0392405	-0.0141569	0.0281576	-0.00467786	-0.00623426	-0.0375584	0.0411606	-0.0103718	0
145.8	0.0486898	0.0381974	-0.0205328	0.00803146	-0.0467533	-0.0117724	0.0511662	-0.0105883	0.00739397	-0.0275614	0
146	0.0492368	-0.0432863	0.0321813	0.0146773	-0.0159199	0.00503771	0.0439909	-0.0081686	-0.0406717	-0.00970347	0
146.2	0.0377557	-0.0332253	-0.0235348	0.00509854	-0.0271783	0.00448831	0.0381558	-0.00867218	-0.0218791	0.0126841	0
146.4	-0.00501158	0.0104105	-0.0424823	-0.0036958	0.00638111	0.00680048	-0.0108407	0.00555471	0.0331637	0.0132499	0
146.6	-0.0253216	0.0371704	-0.0159341	-0.00467497	0.0387459	0.00263386	-0.0116224	0.021685	0.0539723	0.014024	0
146.8	-0.00955531	0.0310598	0.0140758	-0.0097488	0.0212825	-0.0134089	0.00635145	0.00917427	0.036569	0.00476034	0
147	-0.00850846	0.00387358	0.0449413	-0.0187377	0.00191777	-0.0114654	-0.0230759	-0.00227499	0.0307606	-0.0188278	0
147.2	-0.0103657	0.00387481	0.0350924	-0.00220883	-0.00473928	0.0131854	-0.00212477	0.0351567	0.0229341	-0.0164242	0
147.4	0.00397474	-0.00492562	0.00756041	0.0295865	0.0202552	0.012289	-0.0151074	0.0375502	-0.0506151	-0.0195966	0
147.6	0.0174178	0.0053398	-0.0403233	-0.0105277	0.00300726	-0.0154378	-0.0467307	0.05701	-0.0221521	-0.00595236	0
147.8	-0.00434561	-0.0574028	-0.0306772	-0.0251697	-0.0329077	0.000793785	-0.00668341	0.00553981	0.0144155	-0.00428786	0
148	-0.0120938	-0.0890216	0.0169106	-0.0290102	-0.0115192	-0.0004466	0.0242329	-0.0199224	0.00701167	0.00991049	0
148.2	-0.00540088	-0.0217576	0.025698	-0.0333167	0.000288891	-0.0106566	0.0120846	0.000375496	-0.0237365	0.0308617	0
148.4	-0.0160789	0.0166183	-0.0151814	-0.00138354	-0.0385802	0.0247244	0.0143411	-0.0229477	-0.0582721	0.0129275	0
148.6	0.0160269	-0.00787977	-0.0468995	-0.00495499	0.00902631	-0.0161008	-0.0145271	0.0157133	-0.0338599	-0.00224393	0
148.8	0.0190784	-0.0371516	0.0148213	0.0437471	-0.0118941	-0.0466149	0.026053	-0.00964399	-0.0222536	-0.00137092	0
149	0.0114162	0.0200149	0.034385	0.0428093	0.017967	-0.0107337	0.0187163	-0.0205618	-0.00961435	-0.00496382	0
149.2	-0.0107348	0.0792937	0.0199184	0.0222173	0.026107	0.031305	-0.00656032	-0.0262183	0.00822337	-0.00683654	0
149.4	-0.0337715	0.0378704	-0.00316731	0.0133036	-0.00245224	0.0074724	0.00202616	-0.0152591	0.013107	-0.00203209	0
149.6	-0.0175408	-0.017736	-0.0117708	0.0272294	0.00473083	-0.0170134	-0.0144145	0.0243618	0.0269337	0.00506147	0
149.8	0.0262775	-0.0168862	0.0212449	0.0610145	0.00353327	0.0351816	-0.0481228	0.0262669	0.0491273	0.00169687	0
150	0.0244414	-0.100689	-0.00679979	-0.00798993	-0.0290201	0.0317043	0.0206612	-0.00828821	0.00251975	-0.0309848	0
150.2	-0.0310948	-0.00323705	-0.0214587	-0.0543586	-0.0202938	-0.00390536	0.00664669	-0.0595159	0.0133044	-0.0321509	0
150.4	0.00501745	0.0271561	-0.0124834	-0.0226873	0.00319482	0.00817821	0.0110964	-0.02422	0.0224089	-0.0214829	0
150.6	0.0162984	0.0141496	-0.00433668	-0.0197251	-0.00673703	0.00570811	-0.0423382	-0.00829084	0.00258803	0.00456211	0
150.8	-0.0144476	0.0251585	-0.00594419	-0.0438418	-0.0104595	-0.0261828	-0.0462619	-0.0428012	-0.00763394	0.0293737	0
151	0.00974216	0.00442669	-0.0233952	-0.0196499	0.0172549	-0.0247746	0.0586083	-0.00120508	0.00823664	0.0234411	0
151.2	-0.00683259	0.0177668	-0.0193058	-0.00918824	0.0113253	-0.0214439	0.0031761	0.0642451	0.0157932	0.0099501	0
151.4	-0.0197157	-0.0137141	0.0766487	-0.0308341	0.00126848	-0.0418545	0.0805194	-0.0131391	-0.0453777	-0.00897097	0
151.6	-0.0321768	0.0391912	-0.00634065	-0.0344597	0.0182562	-0.0158768	0.010009	-0.00469724	-0.0574217	-0.00122454	0
151.8	-0.0202721	0.0421491	-0.0113059	0.011667	0.0232817	0.0178087	-0.063695	0.0400874	-0.0367295	0.0295301	0
152	0.000192906	-0.0196693	0.0241073	0.017306	-0.00691427	0.012289	-0.0157153	-0.00770069	0.031035	0.0165188	0
152.2	-0.00865502	-0.0335758	-0.00645697	0.00419508	-0.0215258	-0.00717899	-0.00962655	-0.0411381	0.0506212	-0.0199338	0
152.4	-0.0196146	0.0151317	0.00258928	0.0579346	-0.0029882	-0.00384469	-0.0585667	0.030106	-0.0278341	-0.00350259	0
152.6	0.00733551	0.0659195	-0.0500026	0.0450243	-0.0200065	0.00751439	0.0392103	0.0275679	0.036375	0.00951589	0
152.8	-0.0156112	-0.00574989	0.0293078	-0.00792166	-0.00292036	0.00649332	0.00664319	0.0242514	0.00848442	-0.00374696	0
153	0.00364508	-0.0509033	-0.0404646	-0.0388151	0.00171557	0.011275	0.0212524	0.00587156	-0.0209524	-0.015657	0
153.2	0.0202328	-0.0288344	-0.0547648	0.0177069	-0.0209623	0.0276184	0.0431239	0.011367	-0.00710815	-0.0323414	0
153.4	0.0232448	0.0435335	0.0469573	0.0471402	-0.00642138	0.0231284	0.0276438	0.0233727	0.00544467	-0.0246116	0
153.6	0.04515	0.0367777	0.0339634	-0.020302	0.0321823	0.00472514	-0.0136221	-0.0101288	-0.00336802	0.0169678	0
153.8	0.0363258	-0.105554	-0.020586	-0.0441895	0.016373	0.00262764	-0.0802563	-0.0382071	-0.0156404	0.0232993	0
154	0.0148557	-0.015871	0.0427552	-0.0172112	0.00843679	-0.0275227	0.0182136	-0.0081524	-0.00235355	-0.00896655	0
154.2	0.0123667	0.0389198	-0.0330605	0.0306877	-0.0197956	0.00438479	-0.0075982	-0.00350375	-0.0283205	-0.00536359	0
154.4	0.0123355	-0.0288514	0.0249947	-0.0153467	-0.010801	-0.0162601	-0.00718319	-0.0209619	-0.0302436	0.0233399	0
154.6	0.00319807	0.00680838	0.0284295	-0.00790545	0.0165747	-0.0197774	0.0156884	-0.0177601	0.00287029	0.0218985	0
154.8	-0.0148575	0.0852857	-0.0373108	0.0362873	0.0156715	0.0197608	-0.00915	-0.00742786	0.0178482	-0.00566646	0
155	-0.0269533	0.00843821	0.0416033	-0.018429	-0.00617538	0.0113619	0.000408503	-0.0193795	0.00624106	-0.00228419	0
155.2	-0.0152983	-0.0236332	0.00226903	-0.0102029	-0.024879	0.00999796	0.0352308	-0.0222345	0.00260193	0.02197	0
155.4	-0.0204941	0.0458821	0.00778701	0.00447433	-0.00614822	0.00173108	0.00761308	0.00712569	0.00358797	-0.0230331	0
155.6	-0.0271749	0.000557247	-0.00843729	-0.0108212	-0.00576003	0.0198561	-0.0332188	0.0179841	-0.00495099	-0.0162572	0
155.8	0.0192824	-0.0101984	-0.0152055	0.0271992	0.0126427	0.0258373	0.0102629	0.039077	0.0222064	0.00404722	0
156	0.00772601	-0.019936	0.00538837	0.0606083	0.0234977	0.00777939	0.0299119	0.0309158	0.0348148	-0.0208566	0
156.2	-0.0343671	-0.0698412	-0.00373664	0.0163764	-0.0140628	-0.0156843	-0.00191823	0.000127575	-0.00841663	-0.0289267	0
156.4	0.0194774	-0.0215132	-0.0380313	-0.0218944	-0.0312764	-0.0357365	0.00758603	0.0143315	-0.0403671	0.0110347	0
156.6	-0.0139469	-0.00448846	-0.015957	-0.0164287	0.0156666	-0.0244901	-0.0476022	0.00092037	-0.0330485	0.00620971	0
156.8	0.00915409	0.00564474	0.0402761	-0.0381504	0.00876157	-0.00457209	0.0094009	0.0122253	0.00575837	0.0155017	0
157	0.0341995	-0.0442798	0.0323997	0.00440492	-0.0363607	-0.020626	0.00988045	-0.0311709	0.0189401	0.0204928	0
157.2	0.0276348	-0.030796	-0.00518762	-0.0165734	-0.0356752	-0.0353969	-0.0148347	-0.0213039	0.00394196	0.0198463	0
157.4	0.00588475	0.021095	-0.0196042	-0.0455917	0.0170508	0.00865095	-0.00859046	0.0155344	0.00381156	0.00961774	0
157.6	-0.0208839	0.00522338	-0.0115994	0.0034917	0.0321261	0.039482	-0.0231229	-0.00907621	0.0101412	-0.00101405	0
157.8	-0.0353831	0.0168451	-0.000355991	-0.0249297	0.00152304	-0.0190111	-0.0234165	0.00755753	-0.0106207	0.00947696	0
158	-0.0339463	0.0588603	-0.0332528	0.00274655	0.0677115	0.0106928	0.0260514	0.0110252	0.0124749	-0.0164439	0
158.2	-0.0115484	0.0663487	-0.0236364	0.000985941	0.0404476	0.0535023	0.0302252	-0.0253808	0.0611392	-0.0156191	0
158.4	0.00609472	0.0070701	0.0128684	-0.0111457	-0.021964	-0.0130306	0.0131073	-0.0248913	-0.0100114	-0.00511084	0
158.6	0.00936171	-0.0273382	-0.0162164	0.0200882	-0.0186654	-0.0353607	-0.000489119	0.0181498	-0.0614941	-0.00235709	0
158.8	0.00706359	-0.0175182	-0.0270175	0.0364432	0.0140399	0.0127272	0.00563537	0.0165277	0.000693352	7.24317e-05	0
159	0.00320378	-0.0210137	0.0276696	0.00231924	0.0040844	-0.00215325	0.0254338	0.000359018	0.0448287	-0.000777043	0
159.2	0.00468092	-0.00666885	-0.0278558	0.000561141	-0.0231719	0.00896188	0.00473157	0.0581751	0.0465312	-0.00884792	0
159.4	0.0216468	-0.0284745	0.0236892	-0.0298341	0.0133888	-0.00601868	0.00396845	-0.0474859	0.00958255	-0.0169514	0
159.6	-0.00285178	-0.0570341	0.0656395	0.0410012	0.0148207	-0.0291625	-0.00988089	-0.00387343	-0.0213801	-0.00195633	0
159.8	-0.00579276	0.00744624	0.0594444	0.0691847	0.00292338	-0.00870532	0.0105099	0.0576379	-0.0150308	0.0112835	0
160	0.00483304	0.0369008	0.0243747	-0.00698182	-0.0121255	0.0109796	0.016227	0.0186823	0.0109206	0.0115422	0
160.2	-0.0026721	-0.0114022	0.0103057	-0.0158248	-0.0277515	0.00374803	-0.0401616	-0.00924743	-0.00719511	0.0061934	0
160.4	0.00645172	0.0382162	0.0412148	0.0557857	-0.0163683	0.0214579	-0.0449177	-0.000941616	-0.0385984	0.00290385	0
160.6	-0.00275071	0.0684568	-0.00910757	-0.00738366	-0.0320083	0.0275148	0.0456717	-0.000472146	0.0364066	0.0204123	0
160.8	0.00307808	-0.0323698	-0.0531084	0.022597	0.0106792	-0.000790057	0.0595277	-0.0245337	-0.034019	0.0114033	0
161	-0.00931637	-0.0287057	-0.0738693	0.038679	-0.0101881	0.0205403	0.011781	-0.0123035	-0.0404622	-0.00759269	0
161.2	-0.0235534	0.0512821	-0.0366428	0.0113171	-0.0191631	-0.000431592	-0.00144293	-0.00290491	0.0159638	-0.0253386	0
161.4	-0.00172503	0.0490624	0.000721931	-0.0239936	0.0149715	-0.0142198	0.0140541	-0.0202518	0.0325308	-0.0230062	0
161.6	0.0263594	0.00560995	0.00568294	-0.0567867	0.00558095	0.0233681	-0.00747619	-0.00518554	0.0374381	-0.00917914	0
161.8	0.0177399	0.0235364	0.0413086	-0.0387186	-0.00367263	-0.0338124	-0.0535227	0.0310653	0.0275662	-0.0131306	0
162	0.0242752	0.0208805	-0.0227287	-0.0128288	0.0109133	0.0231765	-0.0528158	-0.0156827	-0.0111467	0.0307909	0
162.2	0.0200852	-0.00699496	0.0356371	-0.013979	0.00967007	-0.000117294	0.00642005	-0.0256199	-0.00181071	0.0204228	0
162.4	0.00375702	-0.0406983	0.0352479	-0.0225049	0.010215	-0.015849	0.0104836	-0.0214376	0.00791442	-0.00872301	0
162.6	-0.00637244	-0.0449145	-0.0139132	-0.00913063	0.0115774	0.0079801	-0.0316317	-0.0386302	-0.0274989	-0.00540391	0
162.8	-0.0076983	-0.0190308	-0.0211747	0.0402226	-0.00046263	0.012271	-0.0244577	-0.0258191	-0.0389986	0.00663963	0
163	-0.0106112	-2.80737e-05	-0.0410439	0.0643839	-0.0138074	-0.00525849	0.007781	0.0213252	0.00562301	0.0120827	0
163.2	-0.0128265	-0.00529266	-0.00615527	-0.00304996	-0.0118612	-0.0447371	-0.0223082	0.0180456	-0.00341052	0.0257063	0
163.4	-0.00449191	-0.0550179	0.0210151	0.0240988	0.0131754	0.0049946	-0.015848	0.0145622	-0.0279865	-0.0101254	0
163.6	-0.0355492	-0.07742	0.0482998	0.00247598	-0.0109637	0.0118687	-0.0196211	0.00674204	-0.0139512	-0.0162543	0
163.8	-0.0313927	-0.00964578	-0.0101888	-0.0199365	0.0245914	-0.00943725	0.0130822	0.0315091	0.00240573	-0.00211967	0
164	0.00969642	0.022845	-0.0555904	-0.0404135	0.0217106	-0.00526908	0.0214563	0.0278278	-0.0225949	-0.00417243	0
164.2	0.0243332	-0.0253042	-0.00486266	-0.0696329	-0.0468354	0.000733112	0.000693497	-0.000632711	-0.0166233	-0.0134927	0
164.4	0.0158587	-0.00967038	0.00322204	-0.0243017	0.0079484	0.000560358	0.0527543	0.043606	0.0556782	-0.0262045	0
164.6	-0.0190576	0.0216086	-0.00265481	-0.034675	-0.0101187	0.0178765	0.0128667	0.0208539	0.0224497	-0.0346215	0
164.8	-0.0150654	0.0713624	0.00195981	-0.0541786	0.00335973	0.0256879	0.025641	-0.0164496	0.0249487	0.0313401	0
165	0.011657	0.0672151	-0.0344207	-0.00819538	0.00318092	-0.00457852	-0.0269976	-0.0252162	0.0206775	0.0160034	0
165.2	-0.0122424	0.0162036	-0.039805	0.0179691	-0.016001	-0.00321298	-0.0266776	-0.0064392	-0.0194252	0.0296193	0
165.4	-0.0309614	-0.0332535	-0.0111929	0.033171	-0.00310828	0.00971569	0.048245	-0.020972	-0.023515	0.0538111	0
165.6	0.0251951	-0.0436142	0.00748394	0.064659	0.00630413	-0.0224535	0.0465867	-0.0438836	-0.00131159	-0.017162	0
165.8	0.0457861	0.000350701	0.0581422	0.00237952	-0.026687	-0.0211008	0.016122	0.0206966	-0.0294581	-0.0086228	0
166	-0.00330443	0.0070544	0.00735625	-0.00170341	0.0150674	-0.00599989	-0.0467893	-0.000435622	0.00801814	-0.0341526	0
166.2	-0.0194544	0.0178464	-0.0185456	-0.026397	-0.0021238	0.000380949	0.0634641	-0.00253987	-0.0024461	-0.00351699	0
166.4	-0.0207739	0.0363746	0.0133614	0.00419404	0.0177097	0.00536278	0.0558975	-0.00180989	-0.0348867	0.0159993	0
166.6	0.00201291	-0.0150078	0.0384216	0.011691	0.0271262	0.00768301	-0.0342836	0.00224455	-0.00760259	9.90748e-05	0
166.8	0.0189337	-0.0460931	0.0286388	-0.0131627	0.000922808	0.001607	-0.0102934	0.0117196	0.0297054	0.0108382	0
167	-0.0174991	0.0277027	0.0163224	0.0388978	0.0284022	-0.00240446	0.00196103	0.0138506	0.00594127	0.0262532	0
167.2	0.002837	-0.00433013	0.0157618	0.011078	-0.0126309	-0.0036044	-0.0399852	0.0541081	0.00174521	-0.00622005	0
167.4	0.0227029	0.0257071	-0.00970287	0.00819519	0.000568556	-0.0282554	-0.0182616	-0.0397923	0.0263083	0.0130938	0
167.6	0.0309602	-0.0221597	0.0333941	0.021708	-0.00562438	-0.00956733	-0.0426874	-0.0236075	0.0195735	-0.0151897	0
167.8	0.0382021	0.00672415	0.0222552	-0.000186654	-0.0191098	-0.0114592	-0.0209701	0.0118213	0.0215875	-0.0353901	0
168	0.0262464	0.0470939	-0.0458775	-0.0195173	-0.0181117	-0.00932062	0.0168194	-0.017608	0.0103901	-0.014217	0
168.2	-0.0033338	-0.0494709	-0.0526805	-0.022089	-0.00210155	0.0196516	-0.0265742	-0.0238949	-0.0134348	-0.0127717	0
168.4	-0.00710499	-0.0499645	-0.0279962	-0.0271036	0.0346805	-0.00430318	-0.0359338	-0.023974	0.0256703	-0.0206993	0
168.6	0.0032795	0.0461311	0.0121596	0.0663508	-0.00421905	0.0338364	-0.000168528	-0.0151941	0.00736833	-0.00902083	0
168.8	-0.0338686	0.00273208	0.00839436	0.0521386	-0.0166827	0.0156096	0.0596677	0.0118372	-0.00616762	0.0138506	0
169	-0.0261705	-0.0328758	0.000435284	-0.0115386	0.0214368	0.0197417	0.0526421	-0.00304725	-0.0206194	0.0215092	0
169.2	0.000880928	-0.0130622	-0.0196244	-0.0624258	0.0137125	0.0183641	-0.00441026	0.0167441	-0.0189601	0.000722136	0
169.4	0.00532767	-0.0100237	-0.0274146	-0.049264	-0.00723239	-0.00243515	-0.0183372	0.0408451	0.00435895	6.96623e-05	0
169.6	0.00350508	0.00736187	0.0219134	0.0211801	0.0267863	0.012249	-0.0127263	-0.0024541	0.0104197	0.0323695	0
169.8	-0.0253116	0.0458135	0.0454554	0.00615008	0.00509217	-0.00143564	-0.0622612	0.0151347	-0.000141852	0.0171096	0
170	-0.00112385	-0.0192803	-0.00556435	0.000835172	-0.0289767	-0.00855155	-0.0119183	-0.00508279	-0.00717806	0.00317866	0
170.2	0.00572423	-1.77512e-05	-0.0335056	-0.00188537	-0.0339952	0.0106609	-0.0110003	0.0240007	-0.0175727	0.00491377	0
170.4	-0.0106819	0.0303821	0.0287974	-0.0249616	-0.0165913	0.00645452	0.0396124	0.0410026	-0.015177	-0.00866432	0
170.6	-0.0022083	0.0376515	0.0748855	-0.00406288	-0.00725437	0.0113523	0.0435081	-0.00788221	0.00188954	-0.0176519	0
170.8	0.00866687	0.0338944	0.034693	0.028125	0.00385028	0.0378394	-0.0205136	-0.0216652	0.0186058	-0.00906348	0
171	-0.0201319	-0.0242396	-0.0243724	-0.0271768	0.0335641	0.00713266	0.00681484	0.026116	0.01215	-0.00441551	0
171.2	-0.0240549	-0.0341586	-0.0703644	-0.0524665	0.0257535	-0.0480798	-0.0628559	-0.0289521	-0.0293979	0.016861	0
171.4	-0.00146385	-0.0370661	0.000980765	-0.0241098	-0.00785001	-0.0280262	0.0427665	-0.0401771	-0.0147443	0.00308897	0
171.6	0.00799253	-0.0207256	-0.0308701	-0.00331245	-0.0116627	-0.00286041	0.0329046	0.00229719	-0.0195324	0.00535935	0
171.8	-0.0162957	0.0301976	-0.0492835	0.0171307	0.0136997	-0.00116163	7.77896e-05	0.0159115	-0.0122655	0.0149895	0
172	0.00234931	0.0372542	0.000558919	0.0153622	0.0115627	-0.01438	0.0186553	-0.0121073	-0.012838	0.0174064	0
172.2	0.0391914	-0.0404279	-0.0157166	-0.0138033	-0.0172825	-0.0294694	-0.0384977	-0.0297314	-0.0383289	0.0169024	0
172.4	-0.0221829	-0.0745203	-0.030836	-0.00633268	-0.0093613	-0.0231217	-0.0692926	-0.0240207	0.00739275	-0.00220506	0
172.6	0.00582014	0.00290508	0.0198858	-0.0179891	0.00294738	-0.0253549	-0.0218252	-0.0253536	0.0164492	-0.000274724	0
172.8	0.0264518	-0.0237669	0.00604269	0.0111849	0.00299809	0.00244359	0.0126769	-0.00317991	0.000659342	0.0220302	0
173	0.0175325	-0.00114314	0.010362	0.0604641	-0.0294957	0.00660524	0.022212	0.0300376	0.00903606	0.00375593	0
173.2	-0.00463839	0.0615807	-0.00441161	0.0610952	-0.00798839	-0.0133314	0.0307109	0.0160263	-0.0117697	-0.030979	0
173.4	0.00748987	0.0468482	-0.0226691	0.00913944	0.0376783	-0.0041731	0.0203946	-0.00686832	-0.0298448	-0.039093	0
173.6	0.0539768	0.0284385	0.0228809	-0.000537825	-0.00032301	0.0259483	0.0109111	0.0144796	0.0212539	-0.0280247	0
173.8	0.0228652	0.0675876	-0.00861774	0.0573691	-0.0211942	0.0237725	0.0527097	-0.000754316	0.0267317	-0.00158592	0
174	-0.00773603	0.0467466	0.0168357	-0.0228511	-0.00557553	0.00880815	-0.00130442	-0.00875609	0.0148176	0.005734	0
174.2	-0.00740224	0.00371834	0.0460605	0.014434	-0.000999887	0.00592837	-0.0193865	-0.00088253	-0.00287859	-0.00523447	0
174.4	-0.0349205	-0.0213335	0.026842	0.0299832	0.0162726	0.046149	-0.0100916	0.0290553	0.00597153	-0.0142266	0
174.6	-0.0597154	-0.0388886	-0.0155032	-0.0426399	0.0282542	0.0188429	0.0193262	0.0245733	0.00938131	-0.00448538	0
174.8	-0.0484487	-0.0448723	-0.0181417	-0.047534	0.00406568	-0.0400632	0.0325443	-0.0239088	-0.00971625	0.00564021	0
175	-0.0451685	-0.0100163	0.0340055	-0.000657779	-0.0137222	0.0332451	-0.022994	-0.00809907	0.00640031	-0.00542266	0
175.2	-0.00792216	0.0307045	0.037963	-0.0126038	-0.00906433	0.0359868	0.0258379	0.0646404	0.0372241	-0.00218627	0
175.4	0.0447103	-0.0241557	-0.0636187	-0.0260027	-0.0202814	0.0208379	0.0458381	-0.000822602	0.0324549	0.00616316	0
175.6	0.0323675	-0.0322388	-0.0671736	0.0168861	-0.00165013	0.0134923	0.0179441	-0.00353207	-0.00836691	0.0217558	0
175.8	0.00631406	-0.0332179	-0.0397145	0.0199479	-0.0112485	0.00979238	0.00875772	-0.00422785	0.0032075	0.0197527	0
176	-0.00187731	-0.0238744	-0.0178858	0.0199011	-0.0188779	-0.00387354	-0.0188551	-0.0265949	0.0264329	0.000460657	0
176.2	-0.00675057	-0.0144425	0.0348267	0.0432796	0.0236439	-0.0182564	-0.0629348	0.0124033	0.00707335	0.00505057	0
176.4	0.0235022	-0.086859	0.0136479	-0.0367733	0.00729653	-0.00634147	-0.0111424	-0.00430636	0.0171003	0.0278302	0
176.6	0.018421	0.0938676	0.0521256	0.00974423	0.000342872	-0.0112985	0.000577099	-0.00203749	-0.0545582	0.00234061	0
176.8	-0.000430591	-0.0203878	-0.0034387	0.022713	0.0233577	0.00198385	-0.0271746	-0.0109002	-0.0274336	-0.0106835	0
177	0.0227438	-0.0104568	-0.00394907	0.00741766	0.0299876	-0.0211774	-0.0366029	-0.0322703	-0.00204299	-0.0277755	0
177.2	0.0329197	0.0693465	0.0434364	0.0197895	0.00658344	-0.0303418	-0.0473663	0.0010274	-0.0307662	-0.0226778	0
177.4	0.000395903	-0.0121213	0.0597468	0.0317161	-0.0121513	-0.0024657	-0.0338889	0.0267373	-0.00406561	0.00734295	0
177.6	-0.0168788	-0.00105223	0.0619845	0.00893724	-0.00959444	-0.0183629	0.0102493	-0.0423291	0.0458015	0.00392241	0
177.8	-0.0220306	0.0228719	-0.022841	-0.0431157	-0.0100004	-0.0305928	-0.029935	-0.0400509	-0.0228378	-0.00430606	0
178	-0.014875	0.0319508	-0.0163167	-0.0842548	-0.00713646	0.0187716	0.0392018	0.0633157	0.0102895	0.00582913	0
178.2	-0.0376073	0.0249611	-0.0148281	-0.00242205	0.0035819	0.000276369	0.0509956	0.041902	0.0192664	0.00433704	0
178.4	-0.0191974	0.021526	-0.0469452	-0.000846454	-0.00244714	-0.0192766	0.0273183	-0.035532	-0.0107499	0.00493615	0
178.6	0.0208631	0.0183029	-0.0249241	-0.0430709	-0.00934568	-0.0269403	0.00878962	-0.0408631	-0.00295603	0.013938	0
178.8	0.0306661	0.00751188	0.0231884	-0.012816	-0.00303482	-0.0337517	-0.00495292	0.00339744	0.00735602	0.00565951	0
179	0.0379322	-0.00937898	-0.00361014	-0.0359052	-0.0038616	0.0243996	0.0325772	0.0443123	-0.0208781	-0.0212785	0
179.2	-0.0153803	-0.0451995	-0.00247959	0.00949393	0.0133679	0.0128675	0.0227912	0.0420712	0.00307192	-0.0276832	0
179.4	-0.0113759	-0.0148853	0.0345244	0.00399164	0.00374208	0.0174913	0.0232863	-0.0078855	-0.019581	0.0048134	0
179.6	0.0131191	-0.0178675	0.0238911	-0.00353652	0.0210199	0.0069036	-0.0286401	-0.0293554	-0.0129384	0.00896733	0
179.8	-0.0020187	-0.0442273	0.00141146	-0.0113156	-0.00157327	0.00605637	-0.0270964	-0.0478939	0.0176468	-0.00916896	0
180	-0.0349948	-0.0380831	0.00960069	0.00166564	-0.0232075	0.0130423	0.00534516	-0.0462056	0.0283681	-0.00557838	0
180.2	-0.0351651	0.0111712	-0.0227928	0.043728	0.0155235	-0.00656907	-0.0257337	0.0161809	0.0168232	0.00598544	0
180.4	-0.00590016	0.0737111	-0.092682	0.0221174	-0.0292382	-0.00817653	0.015218	0.0459435	-0.028869	-0.00334243	0
180.6	-0.00159209	-0.0300613	-0.0135139	0.0529832	-0.0231064	-0.039513	0.0035185	0.0487058	-0.0240124	-0.00118418	0
180.8	0.0130976	-0.0397875	-0.0200357	0.022578	-0.00281183	-0.00799186	-0.0124012	0.0167408	0.00979754	0.0114197	0
181	0.00808773	-0.0041589	0.0203013	0.00450184	-0.00819637	0.00505781	-0.0074859	-0.0377242	0.0059358	0.0133236	0
181.2	0.00432105	0.0317543	0.0280361	0.0120809	-0.00597169	-0.0120523	0.00987187	-0.0343351	-0.0258723	0.00287045	0
181.4	0.0239648	0.03677	-0.0172205	0.00601861	-0.00716729	-0.000500904	0.0142263	0.0287046	-0.0365817	-0.0047591	0
181.6	0.0196377	-0.0418397	0.0646474	0.0105949	-0.0232685	0.0205537	-0.00396842	0.0456875	-0.00143645	-0.000447851	0
181.8	-0.00731006	-0.0302563	0.0156324	-0.0194406	0.0255247	0.0296921	-0.0089327	0.000518644	0.0530897	0.00758456	0
182	-0.0161597	-0.00944406	-0.0387018	-0.0469588	-0.000959763	0.00559747	-0.05632	-0.0535744	-0.0107911	-0.0042863	0
182.2	0.0234247	0.0770156	0.0213924	-0.0231075	-0.0129646	0.0113846	-0.0253177	-0.0305567	0.00781097	-0.0114353	0
182.4	0.0148229	0.0890446	0.0311504	-0.00351652	0.0134235	0.006249	0.0250076	0.00233505	0.0451652	-0.00031776	0
182.6	-0.00719119	0.00140745	-0.0255621	-0.048736	0.0396139	-0.0125225	0.0198895	0.010094	-0.000134038	0.00121716	0
182.8	0.0266506	-0.0256215	-0.0108326	-0.0679174	0.0399222	-0.00267629	-0.00490804	0.0317506	-0.0261562	-0.0226453	0
183	0.014222	0.0113067	0.0175796	0.0353511	0.0113563	0.0189116	-0.00919193	0.0316908	0.0177163	-0.021452	0
183.2	-0.0177844	-0.0136756	-0.0238133	0.0892679	0.027416	0.0660198	0.0456902	-0.0144022	0.0156448	0.0352815	0
183.4	0.0490309	-0.0791858	-0.025966	0.0965775	0.0454427	0.0572811	0.0773208	0.0235864	0.017363	-0.00300739	0
183.6	0.0212629	-0.0528535	0.0404712	0.0276408	0.0417994	0.0405353	0.0803635	0.0293121	0.0157414	0.00227752	0
183.8	-0.00160279	-0.0304894	0.0327652	0.0248791	0.0560738	0.0605484	0.0156657	0.0356012	0.00492153	0.0123148	0
184	0.0282358	-0.012131	-0.0190245	0.0417411	0.0507708	0.0734416	-0.0270078	0.0584665	0.0149885	-0.0193997	0
184.2	-0.00339808	0.0639347	0.011022	-0.0470746	0.00941065	0.0628532	0.0274557	0.0250246	0.0420872	0.00402318	0
184.4	0.0319495	0.00555752	0.00887422	-0.0241547	0.0314138	0.082251	0.0208784	0.0354416	0.0357439	0.0256013	0
184.6	-0.000639217	-0.033067	0.0031329	0.0022463	-0.0160789	0.0660162	0.069845	0.0528893	0.00361796	-0.00609306	0
184.8	0.00143535	-0.00467272	-0.00332279	0.00264503	0.0105803	0.0365797	0.0386132	-0.00390308	-0.00566806	0.00740936	0
185	0.037115	0.00797522	0.0184022	0.0154019	0.0411247	0.0722763	0.0143933	0.0177486	0.00677216	0.032198	0
185.2	0.0188183	0.0333392	0.0370998	-0.0208836	0.00983593	0.0686988	0.0319308	0.0491923	0.0337959	0.0141584	0
185.4	-0.0190853	0.034986	0.016729	-0.0472807	-0.0195899	0.037567	0.0125452	-0.00642055	0.0394983	0.000758232	0
185.6	0.00484178	-0.040252	-0.0149178	0.0360538	-0.00681577	0.111501	0.00638374	0.00700573	0.0100993	0.0161312	0
185.8	0.00756671	0.0288948	-0.0344825	0.00603117	0.0298455	0.0750584	0.0735089	0.067165	0.0319458	-0.0114903	0
186	-0.00563561	-0.00624537	0.0236329	0.0272417	0.0171645	0.0412204	0.0397462	0.0354279	0.00653075	0.0190059	1
186.2	0.0356722	-0.0140097	0.0260379	0.0760253	0.0196621	0.0937212	0.09111	0.0459008	0.0184246	0.0373873	1
186.4	0.0744002	0.0342521	0.0525343	0.112547	0.0184177	0.140655	0.114534	0.0505278	0.0468584	0.00890253	1
186.6	0.0762039	0.0489165	0.0814109	0.107818	-0.00605375	0.113177	0.0750361	0.020529	0.0589937	-0.0193981	1
186.8	0.0686425	0.0480212	0.0417819	0.0483411	-0.0210503	0.0720572	0.0791876	0.0253976	0.0467545	-0.00714535	1
187	0.0429113	0.0598125	0.0524505	0.015564	-0.0253057	0.0765646	0.0547636	0.0132139	-0.00758652	0.018585	1
187.2	0.0444662	0.000241681	-0.00306826	0.0562453	-0.00857941	0.0795217	0.102953	-0.00845291	0.0341769	-0.0264876	1
187.4	0.0603444	-0.019026	0.0585933	0.0339278	-0.0147701	0.0571931	-0.0113861	0.0396965	-0.00201331	-0.063513	1
187.6	0.0290274	0.0536468	0.0581257	0.0570452	0.0131331	0.0377998	0.0300111	0.00921075	-0.00164694	-0.0518309	1
187.8	0.0182876	0.0571179	-0.00878758	0.0586961	0.0128373	0.043449	0.0798608	-0.0384244	0.0314913	-0.0203539	1
188	0.0296714	-0.0189718	-0.0212132	0.00340247	-0.0335048	0.0465609	0.00741126	0.00563042	0.00320342	-0.0166673	1
188.2	-0.00306017	-0.0215558	-0.0344471	0.0272028	-0.0367012	0.029184	0.0471427	0.0481024	-0.0238074	-0.0392902	1
188.4	0.00954102	-0.00186723	-0.0681021	0.0578911	-0.0283131	0.0296945	0.0256918	0.0395188	-0.00137934	-0.0232079	1
188.6	-0.00135788	0.0554944	-0.037521	0.0351603	0.00677894	0.023355	-0.0123735	0.0179373	-0.018823	0.0255084	1
188.8	-0.0175588	0.0214549	-0.0374275	0.0440564	-0.0199837	0.0142749	0.0182205	-0.03866	-0.0519988	-0.00581854	1
189	-0.0367382	-0.0117493	-0.0418934	0.026144	-0.0329176	-0.00093996	0.00224765	-0.0520227	-0.0194187	-0.0312027	0
189.2	-0.0387466	0.00597797	0.00747558	-0.00895732	-0.0163984	-0.00380849	-0.0339994	-0.0107405	-0.00215481	-0.0140476	0
189.4	-0.00855508	0.00897612	0.0417928	0.00672543	-0.0064995	0.0094652	-0.00264423	-0.00394487	-0.0530491	-0.0167525	0
189.6	0.00784753	0.00578888	0.0129476	0.0081392	0.0147085	0.00474674	0.0147849	-0.0301928	-0.0388512	-0.0227534	0
189.8	-0.0165334	0.0226144	0.0386034	-0.0506128	-0.022815	-0.00232909	-0.00517272	0.00416605	0.0282582	-0.00340693	0
190	-0.0404918	0.0389445	0.00982739	-0.0431614	-0.0189294	0.016986	-0.0602777	0.00883896	-0.0161899	0.00312883	0
190.2	-0.0265322	-0.0324409	-0.0335461	-0.0225005	-0.0249671	-0.0117643	0.0191192	0.0312319	-0.048086	-0.0221428	0
190.4	-0.0187895	-0.0623421	0.0157901	-0.0299733	-0.0265785	-0.0376406	0.0283122	0.00891565	-0.0636339	-0.0023796	0
190.6	-0.0268857	0.00587178	0.065631	-0.0414041	-0.0135325	-0.0182443	-0.0470554	-0.043504	-0.0767406	0.0248692	0
190.8	-0.0278545	0.0170659	0.0421786	-0.0367397	-0.0342021	-0.0157248	0.000487037	-0.0165721	-0.0434904	0.00549066	0
191	-0.0387617	-0.0295121	0.0626598	-0.0121057	-0.0525933	-0.0386289	0.0183334	0.0255284	-0.0129497	0.0326752	0
191.2	-0.0157551	0.0690274	-0.018682	0.0163603	-0.00354911	-0.0250447	-0.0204512	0.00730428	0.0292892	0.0137541	0
191.4	-0.0365002	0.0195337	-0.0361941	0.0178872	0.0280552	-0.00136634	0.0024212	-0.00864712	-0.00647032	0.00875329	0
191.6	-0.0169523	-0.0343193	-0.03309	-0.013934	-0.0144273	-0.0044689	-0.0165625	0.0381766	-0.000221696	0.0100946	0
191.8	-0.0129772	0.00593904	-0.0193601	-0.0273569	-0.037064	0.00696989	-0.0274369	0.0365742	0.0230252	0.00118185	0
192	-0.0318888	-0.00311367	0.0156879	0.00567047	-0.0145225	0.0265945	0.0036852	0.00165855	-0.0148855	-0.00704878	0
192.2	0.00376978	-0.0605071	0.031661	0.0174039	-0.0240704	-0.000540853	-0.0233478	0.0494783	-0.035359	-0.0171379	0
192.4	-0.0456223	-0.016772	0.0715634	-0.0347527	-0.014365	-0.0160291	-0.00784445	0.029854	-0.0147069	-0.0265578	0
192.6	-0.00280255	-0.014948	0.00424805	-0.00474286	-0.0071669	-0.0137476	0.0142983	0.00848149	-0.00873269	-0.00918532	0
192.8	0.0238733	0.00342508	0.0112408	0.026176	-0.0198277	-0.00321257	-0.01097	-0.0215848	-0.0185993	0.0267962	0
193	0.0168205	0.0360049	0.0193513	0.0291527	-0.0252262	-0.0399773	-0.0394088	-0.0465153	-0.0143814	0.0243942	0
193.2	0.0166218	0.0158469	-0.0283511	0.00734545	-0.00862022	-0.0462382	-0.00681219	-0.0612433	-0.0181151	0.0170623	0
193.4	0.00265095	-0.00937998	-0.0529909	-0.0332176	0.010131	0.00109688	0.0634816	-0.0445747	-0.0233346	0.0351554	0
193.6	-0.0233321	0.0204121	-0.0437545	-0.0496168	0.0178733	-0.0222231	0.0638658	0.0112129	0.021131	0.012416	0
193.8	-0.0133903	-0.0276063	0.0206669	-0.0541166	0.025186	-0.00810184	-0.0246328	-0.022589	0.0361821	-0.0134553	0
194	0.0157819	-0.0329955	-0.00102236	-0.0265591	0.0199855	-0.0146824	0.0504808	-0.0376998	0.0023742	-0.00402459	0
194.2	0.0239062	0.0298376	-0.0133341	0.0104909	0.00260062	-0.0223597	0.0273233	-0.00995598	-0.0179823	-0.0113135	0
194.4	-0.0051914	0.000209793	-0.00354814	0.0100452	0.000260035	-0.000942984	-0.052989	0.0127484	0.00669451	-0.00821463	0
194.6	-0.0101425	-0.0209095	-0.000758857	-0.0208937	0.0175883	0.00587226	-0.0365218	0.0112488	0.0199114	-0.000732905	0
194.8	0.023466	0.0403642	0.0290266	0.0129575	0.0180789	-0.0135861	-0.0238884	0.00524758	0.0102441	-0.0134056	0
195	0.00769624	-0.0617301	0.0573667	0.115729	-0.00494415	0.00599748	-0.03245	0.00837042	0.0378683	0.0111702	0
195.2	0.0275129	0.0709593	0.0428063	0.0312035	0.00446415	0.00906058	0.0218172	0.0117993	-0.0192394	-0.0303181	0
195.4	0.0210259	0.0357231	-0.0187103	-0.00912529	-0.0329342	0.0246616	-0.0237545	0.0130368	-0.0473564	-0.0274148	0
195.6	0.0259218	-0.0257526	0.0186463	0.00302588	-0.0461794	0.00638304	-0.064719	0.00892491	-0.023555	0.000551576	0
195.8	-0.00495008	0.0149842	0.0151464	-0.00237581	-0.0149485	-0.0114248	-0.000465273	-0.0334622	-0.00661352	-0.00760136	0
196	-0.060141	0.00490445	-0.0563119	-0.0361366	0.0127961	-0.00552708	0.0351707	-0.0491518	0.00650401	-0.0156564	0
196.2	-0.0229091	-0.0303319	-0.00977209	-0.0770808	0.0218648	-0.00952966	-0.0144996	0.00864267	0.0157446	0.014086	0
196.4	-0.0013064	0.0239048	-0.0695048	-0.0242274	-0.0131317	0.0511941	0.0415965	-0.0156788	-0.0297704	0.0292943	0
196.6	-0.0144936	-0.0271816	-0.0723861	0.0337516	0.00280977	0.0553616	0.0247466	0.0570431	0.0498945	0.0460332	0
196.8	-0.0171484	0.00666711	-0.019478	0.0519141	0.0133471	0.0100252	-0.00813501	0.0627001	0.039634	0.00447783	0
197	-0.0247472	0.00993616	0.0557662	0.0181197	-0.0109189	-0.0198659	-0.00180394	0.0040522	-0.0244645	-0.0147087	0
197.2	-0.0202119	-0.0511244	0.0485196	-0.016031	-0.00798271	-0.0104287	0.0015091	-0.0226467	-0.0117263	0.00884381	0
197.4	0.00142791	-0.0295049	-0.0168988	0.0265474	0.0295407	-0.00703767	-0.00976412	-0.0122778	0.0192328	0.0112554	0
197.6	-0.0218021	-0.00325691	0.0215557	0.0882037	0.0192119	-0.0370075	-0.000457995	-0.00115422	0.00183639	0.00726456	0
197.8	-0.0271226	-0.00878984	-0.0403786	0.00512219	-0.011451	-0.0145951	-0.00465548	-0.0539404	-0.00810447	-0.0217399	0
198	0.00410508	-0.00990612	-0.0314532	-0.0438229	0.0087103	-0.0180702	-0.0189304	0.00440045	-0.00756631	-0.0246693	0
198.2	0.00740735	0.00354393	0.0310272	-0.0479474	-0.0107227	-0.010424	-0.000297606	0.0237704	0.0124305	-0.0533877	0
198.4	-0.0095127	0.0440276	0.025971	-0.0342455	-0.0181488	-0.00370441	0.021073	0.012088	0.00617492	-0.028981	0
198.6	0.00170233	0.057966	-0.0124515	-0.0312316	0.000960073	-0.00210315	-0.00576578	-0.00890113	-0.0199505	0.0187074	0
198.8	0.0318535	2.97197e-05	0.000403737	-0.0305599	-0.0118449	0.0241308	-0.0425428	-0.0460013	0.00346294	-0.00677712	0
199	0.0292951	-0.0263574	0.0178748	0.0490931	0.0309287	0.0219184	-0.0131048	0.0531732	0.0301763	0.0355343	0
199.2	-0.0229338	0.0059693	0.0601416	0.046668	0.00831002	0.0261151	0.0379162	-0.0202271	-0.0312649	0.0233261	0
199.4	0.0211559	0.0345587	0.00385347	-0.00542832	0.00768182	0.00401673	0.0518246	0.0109773	-0.0190143	-0.00820019	0
199.6	0.044085	0.0195456	-0.0505773	-0.0207453	-0.0149158	0.0170335	0.00994861	0.00988518	0.0212218	0.0153969	0
199.8	0.0170847	-0.0638931	-0.0119348	-0.00392633	-0.0292681	0.0147939	0.00294297	-0.0204472	0.0149531	0.0175422	0
200	0.00414202	-0.103846	0.0170789	-0.000719307	0.0129483	-0.0237183	0.0103958	0.0254479	-0.00228246	-0.0176655	0
200.2	-0.0184873	-0.0100764	-0.0242357	-0.0273082	0.0217216	0.00757718	-0.063136	0.0138476	-0.00989357	-0.00145182	0
200.4	0.0103059	-0.023632	-0.00400034	-0.0666709	0.000658587	0.0179706	-0.0386488	0.0340625	-0.0194639	-0.0285878	0
200.6	-0.00462325	-0.042749	-0.00851623	-0.0143206	-0.0126604	-0.0185746	0.0192971	-0.0174454	-0.0022507	0.000117609	0
200.8	0.00596629	0.0231928	-0.034611	0.00330968	-0.00730669	-0.0231979	0.00637097	-0.0188123	0.0277133	0.0046603	0
201	0.0233993	0.0463331	0.00964509	0.0314899	-0.000451656	-0.0172858	-0.0283453	0.00444646	0.00908468	-0.0248498	0
201.2	-0.0144008	0.00115134	0.0211876	0.0422209	-0.00805051	-0.032241	-0.0067678	-0.00306436	-0.0183766	-0.0249146	0
201.4	-0.0619708	-0.0093877	-0.0350575	-0.0116098	-0.0100862	-0.0247091	0.0343335	0.00434061	-0.0100729	0.00413309	0
201.6	-0.039	0.00823315	0.0316832	0.0286334	0.00543955	0.00591898	0.0221814	-0.0028916	-0.0234982	0.0253484	0
201.8	0.0211718	0.0538208	0.00504514	0.0354681	-0.0242549	-0.0152599	-0.00124412	-0.0642058	0.0061952	0.0393479	0
202	0.020451	0.010853	0.025069	0.0236339	-0.012648	-0.0100015	-0.0124976	0.0228662	-0.0220328	0.0048308	0
202.2	0.0165886	0.0217711	0.00393184	-0.00389441	0.0153578	0.00158505	-0.0174378	0.0186749	-0.0336262	0.00105835	0
202.4	0.0255132	0.040384	-0.0359384	0.00292215	0.0158026	0.000722928	-0.024481	-0.00289675	-0.00474809	0.00166211	0
202.6	-0.0132481	-0.00166757	0.000114205	0.00783985	0.00892423	0.0245729	-0.0160337	0.0362421	0.0180345	-0.0132649	0
202.8	-0.0596278	0.00827693	0.0202187	-0.0488347	0.0103424	0.0453724	-0.00734913	-0.0241618	0.0329449	0.0140265	0
203	-0.007038	0.0387415	-0.0309981	-0.0270074	-0.00654175	-0.00193041	-0.0411568	-0.00689579	0.0242394	0.0230901	0
203.2	0.0175495	0.0345161	0.0216393	0.0224457	-0.0133958	0.0360836	0.0193228	0.0173583	-0.00376326	0.0057528	0
203.4	0.0382047	0.00821509	0.0046196	0.0118527	0.0263725	0.0505986	0.0584818	-0.0225005	0.0108946	-0.0321	0
203.6	0.0167828	-0.00611451	-0.00309688	0.00510564	0.0113195	-0.00819297	0.0255355	-0.0180971	0.00505423	-0.038965	0
203.8	-0.00583901	-0.00235467	0.0307643	0.0153398	-0.00650124	-0.0266239	0.0241276	-0.00759756	0.000118225	-0.0223721	0
204	0.0077904	-0.015979	-0.00352018	-0.0040508	0.0256746	0.0101101	0.0411876	-0.021001	0.0187849	0.00454113	0
204.2	-0.0138628	-0.0538734	-0.0312816	-0.0226703	-0.000501017	-0.0122249	-0.0205501	0.0409675	-0.0111893	0.0418938	0
204.4	-0.00872713	-0.0424471	0.0515876	-0.0186208	0.00648308	-0.0295854	-0.00681228	0.00460188	0.00858737	-0.00953558	0
204.6	-0.0180957	-0.0325306	0.00402802	0.00832531	-0.00446343	-0.0465023	-0.0152383	-0.0245783	0.0185296	-0.0100903	0
204.8	-0.00872093	-0.0473757	-0.0291122	0.0433993	-0.00621288	-0.00754664	-0.00804174	-0.0231246	-0.00688516	0.0116802	0
205	0.0162935	-0.0410311	-0.0298872	0.0302434	0.00074902	0.0209754	-0.0155908	0.00422158	-0.0197805	0.0249086	0
205.2	0.0206076	0.00608654	0.00241887	-0.00974165	0.00622398	0.000282722	-0.000652302	0.0216308	0.00928394	0.0174312	0
205.4	0.0112925	0.0220592	0.0655633	-0.00563898	0.00947561	-0.0126263	0.0496738	-0.0167975	0.0209258	-0.004625	0
205.6	0.0140811	-0.00425168	-0.00498343	0.00500951	-0.0143344	-0.00822692	-0.00187231	-0.048264	-0.024971	0.00502623	0
205.8	0.0122239	0.0966636	-0.00417133	-0.034181	-0.0205802	0.0310655	0.0436146	0.0138326	-0.00220767	-0.0247806	0
206	0.018706	0.027627	0.00607911	-0.0557361	0.000470316	0.0116926	-0.0223979	0.0189796	-0.022497	-0.01429	0
206.2	-0.01171	0.0055547	-0.0498989	-0.0103102	-0.00580631	0.000472358	-0.0501765	0.0262696	-0.00334176	0.0248255	0
206.4	-0.0340054	0.0506856	-0.0108126	0.0294813	-0.0112542	-0.00066859	-0.0186295	0.0295828	0.0206533	0.0140676	0
206.6	-0.000176317	-0.000321341	0.054059	-0.0141836	-0.0022814	-0.0187613	0.0103704	0.00431653	0.0043824	-0.015711	0
206.8	0.01692	-0.0381092	-0.0357581	-0.0408604	-0.0200271	-0.0143873	0.0739272	0.00802624	0.0189894	0.00710668	0
207	-0.0218192	0.00246394	0.0227226	0.0716842	-0.0103834	-0.0127933	0.0178143	-0.0140432	-0.00946819	0.00770123	0
207.2	-0.0251844	0.0336363	-0.00953944	0.0274104	0.000439892	0.0304568	-0.0127462	0.0180091	0.00486046	-0.0106562	0
207.4	-0.000638512	-0.0229509	-0.0296625	-0.0161845	0.0292243	0.0227187	0.00467522	-0.0043823	-0.0428904	-0.0256157	0
207.6	0.0191208	-0.0573469	0.0243747	-0.0109996	0.0301584	0.00531364	0.0387732	0.0458487	-0.056006	-0.00641087	0
207.8	0.0031721	-0.0421448	-0.0221035	0.0208847	-0.00936139	0.00461719	-0.0094028	0.0609907	0.000554764	0.00971858	0
208	-0.0166982	-0.0202125	-0.0837596	0.0586816	-0.00912923	-0.00258623	-0.0724659	-0.080217	0.0214077	0.00746565	0
208.2	0.0141279	0.0331296	0.0667782	0.0166971	0.0322345	0.00799395	0.00959735	-0.0678894	0.0108647	0.0269609	0
208.4	0.00246208	0.0180715	-0.00489768	-0.0245368	-0.0222864	-0.0119085	-0.0406663	0.0714661	-0.00458327	-0.00716918	0
208.6	-0.013885	0.00105133	0.000433484	-0.0164583	0.015298	0.00286632	-0.0489075	-0.00349998	-0.00953972	-0.00100045	0
208.8	-0.0177302	0.00581504	-0.0129314	0.0256908	0.0415624	0.00333512	-0.0331486	-0.0206985	0.0287329	0.00367026	0
209	-0.00534371	-0.0296237	-0.00964967	0.00537877	-0.0253072	-0.0149222	-0.000290909	0.00278395	0.0315238	-0.0105616	0
209.2	0.00983323	-0.037553	0.0288831	-0.0694539	-0.0649401	-0.0123062	0.0396763	-0.0197532	0.00342107	-0.00660183	0
209.4	0.0041288	0.0134269	-0.00595793	-0.0670794	-0.01335	0.00559146	0.000579978	0.00682097	0.0272897	0.00296501	0
209.6	-0.010872	-0.0284403	-0.0030202	0.0105772	0.0148544	0.0174828	-0.0511869	-0.025653	0.0277959	-0.0174991	0
209.8	-0.0154191	0.053929	-0.0602917	0.00297833	0.0333803	0.0163569	0.0605198	0.00568039	-0.00839695	-0.0299132	0
210	-0.0150244	0.00349545	-0.0274292	-0.0168549	0.0116644	0.00570543	0.0194416	0.00518382	-0.00464298	-0.0227496	0
210.2	-0.00229354	-0.022724	0.0405683	0.0132041	-0.0152381	-0.00169416	-0.0386559	-0.0028897	0.00975575	0.00608028	0
210.4	-0.00839024	0.0377617	0.0326703	0.0114369	-0.0152801	-0.0238403	-0.00693102	0.0151006	-0.0037041	0.00675777	0
210.6	-0.0120343	0.0236141	0.0164956	0.000544541	-0.00870977	-0.0210435	-0.00593837	0.00170462	-0.026661	0.00191869	0
210.8	0.0309751	-0.00962178	0.045529	0.0604218	-0.0026938	0.0258108	-0.0357569	-0.0462512	-0.0267434	0.0366171	0
211	0.0145869	0.0490633	-0.0132319	0.00848194	0.0212422	-0.0263925	-0.0112101	-0.0384044	-0.00123435	-0.0110528	0
211.2	-0.02094	-0.0184096	-0.00683194	-0.0362264	-0.00520316	-0.0214473	0.0702896	-0.0282579	-0.0247711	-0.00572995	0
211.4	-0.00996119	-0.0157951	0.0264065	0.00520374	-0.0222658	0.00946598	0.0539877	0.0243422	0.00754203	0.0135723	0
211.6	0.0126515	-0.00813029	0.0225715	0.00300366	-0.028435	0.00466409	-0.0031272	0.0500636	0.0268569	0.0207698	0
211.8	0.0102702	-0.0477624	-0.0127422	0.00509529	-0.0129359	0.00412375	-0.0138927	0.000827794	-0.00181787	0.0229841	0
212	-0.00110308	-0.0435522	-0.033722	0.0524451	0.028826	0.00638649	-0.00219967	-0.0183397	-0.0116416	0.00909016	0
212.2	-0.0109888	-0.0557711	-0.00825045	-0.0238613	0.0267479	-0.039352	0.0276559	0.0388825	-0.0203672	-0.0107389	0
212.4	-0.0111016	-0.0369763	0.0120452	0.00467175	0.0162319	-0.00482016	0.0560988	0.00541396	0.00721497	-0.0131223	0
212.6	0.00905519	0.011721	0.0165155	-0.000564462	-0.0162167	0.00495925	0.0506208	-0.0203377	0.0115383	0.0175191	0
212.8	0.0218418	0.0834141	-0.0161186	-0.0154716	0.00224557	-0.0102686	0.0108026	-0.0427554	-0.00935846	0.0151199	0
213	0.0274243	0.0524121	-0.0374121	0.00607995	0.0218662	0.00670987	-0.0649639	-0.00184106	-0.0194662	-0.0151649	0
213.2	0.0205219	-0.00263843	0.0142355	0.00405653	0.0066748	0.0383021	-0.0485205	0.0605898	-0.00245085	-0.0154533	0
213.4	-0.00745175	0.040222	0.0419417	-0.0284546	0.0102247	0.0428923	0.0458379	0.0246862	0.00964733	0.0012412	0
213.6	-0.0155085	-0.0403229	-0.0585834	-0.0196682	-0.0027304	0.0292326	-0.0569636	0.00994353	-0.0182353	-0.0138632	0
213.8	-0.0185537	-0.0262009	0.0143889	-0.0618433	0.000636295	-0.0270445	0.0319198	0.00934021	-0.00652003	-0.0109539	0
214	0.00796398	-0.0296219	-0.00424747	-0.0206275	-0.028772	-0.00109732	-0.00403089	0.0402318	0.0290044	-0.0139961	0
214.2	0.0245862	0.0278795	0.0085287	0.00731933	-0.0397343	-0.0231805	-0.0681354	0.0448288	0.0115868	-0.000178915	0
214.4	-0.014278	0.0542576	0.0288671	0.0102249	-0.0131615	-0.0424747	-0.0146425	0.000331421	-0.0316802	0.0134766	0
214.6	-0.0360541	-0.0125549	-0.0571078	0.0626034	0.00200926	0.00612779	0.0368683	-0.0328804	-0.00949612	-0.00546862	0
214.8	0.0216539	0.0149178	-0.0389047	0.0597587	0.00901023	-0.0262876	0.032563	-0.0205025	0.0485318	-0.0153035	0
215	0.0185426	-0.0127747	0.0375691	-0.0282695	0.0312615	0.00111776	0.00839821	-0.00442681	0.0134957	0.00478733	0
215.2	0.0216297	-0.00646512	0.0168002	-0.020788	0.0127273	0.0161854	-0.00838342	-0.00376893	-0.0360229	0.00523799	0
215.4	0.0322078	0.0106043	0.000645513	-0.00530712	0.0341105	0.0145059	0.0167206	-0.0336957	-0.0177347	-0.0159737	0
215.6	0.0149196	0.0502825	0.00237768	-0.0221139	0.0314392	0.000290799	-0.0426442	-0.0631612	0.0143626	0.0206143	0
215.8	-0.00989204	0.0428865	-0.00243736	-0.00703528	-0.0149533	-0.0146526	-0.0878376	-0.032148	0.0234661	0.042648	0
216	-0.00766562	-0.0366851	0.0129193	0.0129762	-0.0204191	-0.00312861	-0.0066362	0.0135704	0.0118488	-0.015831	0
216.2	-0.00676811	-0.0196747	0.0196272	-0.0176881	-0.0163744	0.0146228	-0.0157101	-0.0124037	-0.0321957	-0.00383179	0
216.4	-0.0368325	-0.0202273	0.01333	0.0260354	-0.0190755	-0.00289306	0.0412501	0.0367793	0.00800758	0.00871706	0
216.6	-0.0394586	-0.0626386	0.00257348	-0.0246398	-0.019872	-0.0197912	-7.56297e-05	-0.00189285	0.0213059	0.0175253	0
216.8	-0.00866948	-0.0490061	-0.00396643	0.035699	-0.010806	0.00131907	-0.00543333	-0.00578626	-0.0210849	-0.00666509	0
217	0.00742941	-0.00313457	0.0206324	0.0638097	0.01213	0.0279353	0.0377727	0.0358713	-0.0238995	-0.0209624	0
217.2	0.0100802	0.0125879	0.0142204	-0.0367567	0.0286304	0.0138384	0.026756	0.0348279	0.0116248	-0.000165193	0
217.4	0.025628	0.0254216	-0.0497693	-0.000900423	0.0143749	-0.011432	0.0169426	0.0258969	0.0165268	0.00736906	0
217.6	0.0210746	0.0320806	-0.00309337	0.0479666	-0.00424089	0.00622407	0.0337211	0.00538402	0.0445832	0.00852068	0
217.8	0.0361808	0.0108299	0.0247936	0.0428191	0.00196765	-0.00148388	0.00386965	0.0110314	0.0200407	-0.0161329	0
218	-0.00413249	0.0116831	0.0165849	-0.0233525	-0.003793	0.00860589	-0.0220753	0.0137018	-0.00677127	0.00197725	0
218.2	0.00902599	0.0317559	0.00317747	-0.0436281	-0.00708716	0.0429696	-0.00533935	-0.0152871	0.0158387	0.000206947	0
218.4	0.0229226	-0.0112157	-0.0379063	-0.0242755	0.00829559	0.0337533	0.0135067	-0.0737691	0.0112867	-0.00496095	0
218.6	-0.0321974	-0.0610599	-0.0704246	0.010049	0.00342891	-0.028444	-0.0150347	-0.0851481	-0.0305516	0.0161467	0
218.8	-0.00251046	0.0169604	-0.00147065	0.0771504	-0.0276915	-0.0509431	-0.036626	-0.00513104	-0.0120614	-0.0192114	0
219	0.0102825	0.0420201	0.0599793	-0.00679732	-0.00631668	-0.00549516	0.0360581	0.00519571	-0.0263262	-0.0212465	0
219.2	-0.0103976	0.00225731	-0.00963603	0.000920311	-0.00873032	0.0133335	-0.0293797	-0.00355877	0.00380782	0.00225885	0
219.4	-0.0158907	0.011097	-0.0286554	0.0108515	0.0145014	0.00773661	-0.0384301	-0.0121748	-0.00450714	0.00731335	0
219.6	0.0108134	0.0101523	0.0193011	-0.0154717	0.0366471	-0.0378905	0.00972522	-0.0256842	0.00211014	-0.0197356	0
219.8	0.00493027	-0.0123714	0.0341875	-0.0294029	0.0056137	-0.0452529	0.0175416	-0.00722583	0.0323217	-0.0101062	0
220	-0.0326779	-0.00264931	0.000175922	-0.0242495	-0.0146582	0.0220823	0.0126307	0.0423252	-0.00254722	0.0359625	0
220.2	0.00563382	-0.0295923	-0.0393467	0.00826495	0.0275849	0.00225603	-0.0273269	0.0497291	-0.0170417	-0.00214519	0
220.4	0.0109725	0.0122125	0.051442	-0.0347199	0.0125502	0.018965	-0.00696557	0.0536599	0.0105067	-0.00538525	0
220.6	0.00441635	-0.0450827	0.0643013	-0.0151563	-0.0441715	0.0214166	0.00220429	0.039811	-0.0196836	0.00917703	0
220.8	-0.00437556	0.010935	-0.00911175	0.0298979	-0.0191078	0.0051449	-0.0245927	0.0210372	-0.0280814	0.0446992	0
221	-0.0260631	0.0667643	-0.0531	0.00870736	-0.00285389	-0.0141384	-0.00233444	-0.0200753	0.000609764	0.015228	0
221.2	-0.0181336	-0.0192604	-0.025707	-0.0235121	-0.0433191	-0.0188938	0.0295338	-0.019853	0.0038639	-0.0464637	0
221.4	0.0139585	-0.0172975	0.0190838	0.00883505	-0.00436716	0.00990998	-0.0282037	0.0549163	0.00146585	-0.00779162	0
221.6	-0.0388987	-0.0011395	-0.00503884	0.0233279	0.0307218	0.0195281	-0.00834401	-0.0041452	0.00425704	-0.00726855	0
221.8	-0.0114226	-0.00396493	-0.0407127	0.00430298	0.00841875	-0.00618378	0.0999303	-0.0201727	-0.0259831	0.0291276	0
222	0.0126357	-0.0308838	0.00167751	0.00157772	0.00122591	-0.00671271	0.0795128	0.00191382	0.0166592	-0.00243068	0
222.2	-0.00784025	0.0120786	-0.025704	-0.0314584	0.0245612	0.0190575	-0.0235902	-0.0107908	0.0338425	-0.0293139	0
222.4	0.00716878	0.0351344	-0.0505778	-0.00100086	0.0224047	0.0229794	-0.0457038	-0.0372619	-0.00343182	-0.00284094	0
222.6	0.0452773	-0.0439328	0.0439879	0.0453049	0.00379038	0.00619973	-0.0112918	-0.00812828	0.0187853	0.0101072	0
222.8	0.0183236	-0.0330587	0.0407354	-0.0752516	0.0229888	-0.00395748	-0.00135359	0.0370492	0.0540939	0.0223786	0
223	0.0194247	0.0492656	8.42906e-05	0.056473	0.0049725	-0.0376475	0.0615851	-0.0335814	-0.00265465	0.0256724	0
223.2	-0.0171589	0.0526337	0.0481859	-0.037908	-0.0140855	0.0201259	-0.0395221	-0.029884	-0.00483836	-0.0194908	0
223.4	-0.0247011	0.0102988	-0.0199889	-0.0392829	-0.0138247	0.00962579	-0.074254	-0.016255	-0.0218926	-0.0213356	0
223.6	0.0170398	-0.0452465	-0.0516322	0.0536273	-0.00811373	-0.0109348	-0.00808167	0.00055725	-0.032556	-0.0111009	0
223.8	0.0295882	-0.0326649	0.00838794	0.0249906	-0.0112066	0.00480648	0.0095811	0.0347454	0.00480828	-0.00629983	0
224	-0.0114838	0.0401381	-0.029014	-0.00059408	-0.0137736	-0.0179932	0.0134446	0.00218657	0.0124479	0.0231684	0
224.2	-0.03232	-0.0457066	0.0106557	-0.00673441	-0.000291342	0.0321488	0.0487326	-0.0375491	-0.0193355	-0.00927956	0
224.4	-0.010025	-0.0559353	0.0278007	-0.0288223	-0.00190007	-0.00631107	0.0104596	0.0607595	-0.0523422	0.00193843	0
224.6	-0.013149	0.0638162	0.00867622	0.00327994	-0.00379637	0.0229974	-0.0117974	0.0298465	-0.0279861	-0.0220816	0
224.8	-0.00703816	0.0667434	0.0195705	-0.014215	-0.00940022	0.00155476	0.00414151	0.0068863	-0.00212333	-0.00716877	0
225	0.0235021	-0.0382747	-0.00243734	-0.00690181	-0.00267836	-0.0280334	0.0165485	0.0441997	0.0142532	0.0173654	0
225.2	0.0201052	-0.075716	-0.0422239	0.0382372	0.0173788	0.0186232	0.0289109	-0.0101812	0.0273771	0.00185845	0
225.4	-0.0170764	-0.0382951	-0.00411903	-0.0234731	0.010076	-0.00236981	0.0332815	-0.0874741	0.00509733	0.0150588	0
225.6	-0.00589675	0.0522201	-0.052455	0.0348803	-0.00327515	0.00265495	-0.0293283	-0.0439556	0.0135795	-0.0194823	0
225.8	0.00613357	0.00219473	0.00856667	0.0238081	0.0307799	0.0240432	-0.0132485	-0.00438861	0.0319451	0.0134079	0
226	-0.0187078	0.0252909	0.0485166	-0.00590359	-0.0140867	-0.000478324	-0.00428097	0.014511	-0.00353788	0.0303443	0
226.2	-0.0297695	0.0197291	-0.02871	-0.00498474	-0.0285002	-0.00934314	0.0221308	0.00878095	-0.00620381	0.0166196	0
226.4	-0.00356936	-0.0401999	-0.0377674	0.00417633	0.00502304	-0.00640718	0.0356844	0.0181638	0.00804566	-0.00921115	0
226.6	0.00623122	-0.00266684	0.0481857	0.0147936	-0.00449568	-0.0305598	-0.0414783	0.0509486	-0.0272535	-0.0302066	0
226.8	-0.0113957	0.00244218	-0.00547069	-0.00538728	0.0290495	-0.00636383	-0.0848611	0.024742	-0.00568087	0.00264971	0
227	0.0188029	-0.0260863	0.0250095	-0.0780684	0.00387037	0.00444102	-0.054651	0.0212628	0.0254525	-0.00831971	0
227.2	0.016243	0.0311936	-0.00207029	0.0124629	0.00759476	-0.00462792	-0.0276617	0.00053003	0.0107105	-0.00026595	0
227.4	-0.00337491	0.0115024	0.0245105	0.00411105	0.0162724	0.00600138	-0.0116055	-0.0260423	0.0135483	-0.00118838	0
227.6	0.00144885	0.00591729	0.0883236	-0.0516202	-0.0023795	0.00483398	0.0436496	-0.0201657	0.00514308	-0.0140144	0
227.8	0.0199597	0.0492755	0.0465705	-0.0151216	-0.00377958	-0.0152161	0.0487211	-0.0128856	0.008262	-0.014812	0
228	0.0302123	0.00143848	-0.024663	0.00985627	0.0211972	-0.00273984	-0.0234957	-0.0186563	0.0543896	0.00317936	0
228.2	0.0305222	0.0383055	0.0220475	0.0857327	0.00803823	0.0154832	0.0514443	0.0292029	-0.0202546	0.0511804	0
228.4	0.0149428	0.00837659	0.0246045	0.0235184	-0.00577339	0.0108895	0.0234405	0.0197221	-0.0249911	0.0164657	0
228.6	0.00691314	-0.028973	-0.0406249	0.0295896	-0.0331365	-0.0195507	-0.0138588	0.000730979	0.00388434	-0.0133053	0
228.8	-0.00245409	-0.0366947	-0.037612	0.0336184	-0.0464707	-0.0194836	-0.0222758	-0.0463491	-0.0118358	-0.0204327	0
229	-0.0124777	-0.00891106	-0.0131798	-0.037873	-0.0182039	-0.0111542	-0.0266815	-0.0624661	-0.0182541	-0.00524146	0
229.2	0.002674	0.0284624	-0.0582771	-0.035829	0.0137921	-0.0111293	0.0103054	0.000337722	0.000488141	0.0138671	0
229.4	0.029263	0.011038	-0.059893	0.0406546	-0.00320922	0.0283235	0.0540012	0.0296237	-0.0207717	-0.0133519	0
229.6	0.0143672	-0.0068359	0.00805207	-0.0264469	-0.0289396	0.0183559	-0.0271771	0.0131198	0.0052672	-0.0064246	0
229.8	0.0123219	0.031137	0.0215621	0.00167892	0.0299305	-0.0216547	-0.0218644	-0.015148	0.0195653	0.0181823	0
230	-0.0188288	-0.0316292	-0.0107871	0.00990949	0.018298	0.0227652	0.0252744	-0.0181398	0.0221236	0.028924	0
230.2	-0.0444671	-0.0296479	-0.00980114	-0.0347789	-0.0322097	0.0306438	0.0457842	-0.0297237	0.0213774	0.0092352	0
230.4	-0.0336957	0.0322944	0.0326689	-0.013177	-0.00548052	-0.0213744	-0.000324801	-0.0520692	-0.0099174	-0.011146	0
230.6	-0.0265812	-0.0244925	0.0508628	0.0477502	0.0395106	-0.00999441	-0.0546902	-0.012055	-0.0434962	-0.0046256	0
230.8	-0.0240802	-0.0148064	0.0133112	0.0231301	0.014057	0.00277299	0.0188714	0.0705687	-0.00345542	-0.00685365	0
231	-0.0120122	-0.00339331	-0.015833	-0.000222434	-0.00253993	0.0236973	-0.00388907	0.0312756	0.0226505	-0.0176583	0
231.2	0.0242281	-0.000544338	0.0405339	0.00979024	0.015454	-0.0184765	-0.00996592	0.0268014	-0.00136704	0.0099185	0
231.4	-0.000373274	-0.0250161	0.0175916	-0.00352716	0.0271518	-0.00471463	-0.00700169	0.0565277	-0.0193961	-0.023654	0
231.6	-0.0266778	-0.0108155	0.000637723	-0.0231728	0.00806134	0.0266902	0.00803013	0.0450794	-0.0405892	-0.0328328	0
231.8	0.00599145	0.0361977	0.0307084	0.00312724	0.00394354	0.00791326	0.0165053	0.0201717	-0.04595	0.0254617	0
232	0.0145744	0.014025	-0.0605429	0.0253458	0.0238989	0.00693876	-0.0126638	0.0190635	0.0136438	0.0172032	0
232.2	0.00695181	-0.00889682	-0.0789768	-0.0180714	-0.0141108	-0.0210125	0.0494221	-0.0128851	0.0248153	0.0190245	0
232.4	0.018513	0.0030228	0.0346137	0.0062614	0.00753239	0.00390734	0.036166	-0.0378546	-0.0105009	0.000322685	0
232.6	0.00798836	0.0301253	0.0407615	-0.0154852	-0.0212186	0.0141045	0.0414978	-0.0597359	0.00923712	-0.0172739	0
232.8	-0.00340872	-0.00796049	-0.0265562	-0.0175563	-0.0467505	-0.0132727	0.0276659	-0.0180633	0.032322	-0.00778328	0
233	-0.00208534	-0.0311133	-0.041919	-0.0299097	-0.0213236	-0.0175527	-0.0454806	-0.0103362	0.0337514	-0.000827979	0
233.2	-0.0131315	0.0133726	-0.0484233	-0.0529044	-0.0137793	0.00207943	-0.0837062	-0.0502327	0.0295853	-0.0110653	0
233.4	-0.0237385	-0.0135901	-0.0701557	0.0530203	-0.0163527	-0.0116687	-0.057581	0.0372659	-0.0101403	-0.00443832	0
233.6	-0.0101829	-0.0235731	0.00621198	-0.0195618	0.0113686	-0.010111	-0.0522709	0.0251801	0.00872689	-0.00463496	0
233.8	-0.00207463	0.0416648	0.0169435	-0.0503817	-0.00548787	-0.00941888	-0.0247206	0.0128772	0.0269926	-0.00971775	0
234	0.0130006	-0.00142004	0.0255402	0.0282637	0.0215143	0.00996937	0.0398448	0.00490197	0.0151332	0.00589343	0
234.2	0.0274806	-0.0399394	0.0212418	0.0189036	0.0431416	0.0325529	0.0336518	0.00261956	0.00408652	-0.000815223	0
234.4	0.0253548	0.0184074	0.0025497	-0.0227988	0.0146031	0.0375301	-0.0128539	0.0227581	0.00236068	-0.0137802	0
234.6	0.0127548	0.00973561	0.0327244	0.0489863	0.0173085	0.0333097	0.0404829	0.0327291	-0.00665903	0.00874469	0
234.8	-0.00162648	-0.0321664	0.0414795	0.0279363	0.0307991	0.0171206	0.0851444	0.0103315	-0.0147342	-0.0039903	0
235	0.000331985	0.0533192	0.0602085	0.0339716	0.00237077	9.28636e-05	-0.0351951	-0.018461	-0.0326314	0.00916054	0
235.2	-0.00603736	-0.0190431	0.0416153	-0.0145526	-0.0163553	-0.0248688	-0.00874632	-0.016198	-0.0335837	0.0490489	0
235.4	-0.0140884	-0.0519153	-0.0248256	-0.0163679	0.00202382	-0.002997	0.0392022	-0.0211328	-0.034182	0.0145899	0
235.6	0.00302432	0.0459302	-0.0315854	0.0016689	0.000448419	-0.00235345	0.0295673	-0.0229584	-0.0413025	-0.0358613	0
235.8	0.00259875	0.030361	-0.00192317	-0.0393994	-0.024232	-0.0463942	0.0145061	-0.0156033	-0.0129471	-0.00869881	0
236	-0.0316174	-0.102751	-0.0540125	-0.0238112	-0.0173944	-0.0246296	-0.0332899	-0.0278728	0.0391242	0.0185042	0
236.2	0.0165794	-0.0580961	-0.0269726	0.0508421	-0.0256571	-0.00598096	0.0137617	0.0156158	0.0107637	-0.00312031	0
236.4	-0.0094752	0.027647	0.0515982	0.00837123	0.00979927	-0.0189672	-0.012275	0.0808292	-0.00907259	0.00321932	0
236.6	-0.00282667	0.0232811	-0.00551381	-0.0370396	0.0250328	0.0116022	-0.0493892	0.0359537	0.00823416	0.0149835	0
236.8	0.0117218	-0.0373559	-0.0777012	-0.0351397	0.00882739	0.00209213	-0.0311954	-0.0391875	0.0165015	-0.0017007	0
237	0.000547288	-0.0266145	-0.0623573	0.00962632	-0.0071007	-0.0347575	0.0201845	-0.0417631	0.00613676	-0.0193123	0
237.2	-0.00105393	0.0447359	-0.00454783	0.0421035	-0.0226703	-0.00902233	0.0404115	0.00253977	0.0095614	-0.00755645	0
237.4	-0.0242504	0.0285626	0.0726936	-0.0268619	-0.0338165	0.000735476	-0.0168319	0.0394805	0.0179114	0.0140724	0
237.6	-0.0104884	0.0200864	0.00949456	-0.0174148	-0.0109921	0.00371785	-0.0634967	-0.00109257	0.000169978	0.0272962	0
237.8	-0.0295145	0.084419	0.0299451	0.00646219	0.0256806	0.0299571	-0.0203674	-0.0656977	0.0179272	0.00599653	0
238	-0.0173864	0.0332191	0.0278388	0.0105997	0.00349649	0.00728674	0.0128647	-0.0150972	0.00460416	-0.00566306	0
238.2	0.0136314	-0.04091	0.00218347	-0.0210241	-0.000194127	-0.0213358	-0.00583409	0.0275826	-0.0137716	-0.00651774	0
238.4	0.010631	-0.00998362	0.0190339	0.00673379	0.00196404	-0.0117972	-0.0361582	-0.00335726	0.0121694	-0.0199117	0
238.6	-0.0028583	0.00471266	0.0204217	0.0689305	-0.0450574	-0.00787643	-0.0288906	0.00733791	0.0140388	-0.0248599	0
238.8	-0.00506152	-0.0257998	0.014306	-0.0765931	0.0203011	0.0130695	0.0274265	-0.00960149	-0.0249978	-0.00499502	0
239	0.0296859	-0.0435702	-0.0516346	-0.00380528	-0.000443136	0.0230794	-0.0353674	-0.0196546	0.0127147	0.00238967	0
239.2	-0.0120327	0.016994	-0.000920407	0.0309228	0.00030598	0.0131395	0.0044906	-0.0300149	-0.00538447	-0.0171382	0
239.4	-0.0267704	0.0345268	-0.0306585	-0.0316095	0.0220366	-0.00715475	0.0853327	0.0130867	-0.016296	-0.0248208	0
239.6	-0.0121285	-0.000932253	-0.0776522	-0.0259476	0.00796725	-0.0342746	0.0312361	0.0112776	-0.024528	0.0075543	0
239.8	-0.0192759	-0.0161102	-0.000647846	0.0114934	-0.00748618	-0.0277868	-0.0533118	-0.0578508	-0.0462372	0.0292124	0
240	0.0183298	-0.0323456	0.00871187	-0.0205647	0.00211389	0.0208231	0.00424972	-0.015961	-0.0103546	0.00485838	0
240.2	0.0101297	-0.0130489	0.0298137	0.0319732	-0.00805428	-0.00578824	0.0242265	0.034373	-0.0703929	0.0228555	0
240.4	0.0247277	-0.0104174	-0.0325364	0.0048725	-0.00109942	0.0121333	-0.0720204	0.0217273	-0.0114587	0.00258384	0
240.6	0.01653	0.0274563	0.0210625	-0.00416479	0.00572201	0.00383718	-0.0435253	0.0141135	0.0566832	-0.00702399	0
240.8	-0.0148461	0.0282641	0.0570308	0.0200124	0.00264986	-0.00167582	0.0062337	0.0153521	0.0581701	-0.00924277	0
241	-0.0143318	-0.00680206	-0.020786	0.0140222	0.00165099	0.00803808	0.0232543	-0.0148932	0.0323082	-0.00291533	0
241.2	0.00743052	0.0128148	-0.0337883	0.00450037	0.00449865	-0.00868391	0.0498362	-0.019751	-0.010525	0.0243598	0
241.4	-0.00095514	0.0154682	0.00785416	0.020867	0.0103644	0.0134063	-0.0640398	0.0367706	-0.0513594	0.0145319	0
241.6	-0.00130517	-0.0379018	-0.0149556	0.0131768	0.0275849	0.0169785	-0.0155868	-0.0283192	-0.0278955	0.00919369	0
241.8	0.00347193	-0.0578149	0.0149495	-0.0392927	0.0177108	-0.0385584	0.0296001	0.0161878	0.0209136	-0.0362225	0
242	0.00188747	-0.0157385	0.0427055	-0.0440295	-0.00562965	-0.0116901	0.0462414	0.00276875	0.0173609	-0.00419256	0
242.2	0.013601	0.029159	0.00434422	0.0131247	0.00458822	0.0395733	0.0535874	-0.0219957	-0.0066064	0.0114484	0
242.4	0.027589	0.00803621	-0.0255277	0.0583795	0.00951878	0.00543169	-0.0078267	0.0327096	-0.00192271	-0.0275689	0
242.6	-0.00179741	-0.0439467	0.0174371	0.039305	-0.0350139	-0.0133591	-0.0686309	0.0244239	0.00154205	0.006478	0
242.8	-0.0398322	-0.0254175	0.0472269	-0.0336436	-0.0228323	0.022241	0.0184463	0.0366287	-0.00381941	-0.0233985	0
243	0.000102577	-0.0375362	-0.0116916	-0.0379414	0.0174717	-0.0439303	-0.0240827	0.0022074	0.00716	-0.0224071	0
243.2	0.0158774	0.0427911	-0.0401217	-0.0039439	-0.0297855	-0.033815	-0.00523759	-0.0251646	0.0199408	0.0168768	0
243.4	0.00564588	0.0430829	-0.0161217	0.00872544	-0.0248236	-0.00129735	0.0101373	-0.014457	0.0343943	0.021439	0
243.6	-0.00786162	0.0130995	-0.00928763	0.0309796	0.00599058	-0.00477748	0.00699302	-0.023662	0.0186351	0.00360236	0
243.8	-0.00896696	0.0673115	-0.016114	0.0309759	-0.0192341	-0.00389488	0.0316718	-0.0385293	-0.0222119	0.00780812	0
244	0.0251278	0.00141802	0.00978447	-0.0460744	0.0267864	-0.0176813	-0.0375296	0.0195574	-0.0227771	0.00238768	0
244.2	-0.00394897	-0.0312241	0.00520401	0.00613574	0.0234728	0.0249604	-0.0317597	0.0329582	-0.0213797	-0.00596721	0
244.4	-0.00203389	0.0353455	-0.01261	0.0454047	0.0116048	0.00824932	0.0452147	-0.0284745	0.00996362	0.0247118	0
244.6	0.0351186	0.0504969	0.0532803	0.00695332	-0.00224546	0.00355465	0.0336149	-0.0135946	0.00305452	-0.00563097	0
244.8	0.0134724	0.0480537	0.0501489	-0.0115804	-0.000961672	0.0268855	0.0071097	0.00825598	0.000328992	-0.0206365	0
245	-0.0191985	0.0338665	-0.0325808	-0.00189743	-0.00298559	0.00506551	0.0305939	-0.0259194	0.0101828	0.00510292	0
245.2	0.0209983	-0.0395811	-0.0312395	-0.0331221	-0.0208519	-0.0231065	0.0186503	-0.0169703	-0.0078196	-0.00714268	0
245.4	0.0197741	-0.0295383	-0.0206389	-0.0468276	0.00258367	0.0305221	-0.0203795	0.0193041	0.0143011	0.0126133	0
245.6	-0.0150798	-0.0153203	0.0360439	-0.0226715	-0.00841791	0.0123321	-0.0607099	0.0185279	-0.00283923	-0.00253509	0
245.8	-0.0191849	0.0230356	-0.00334525	0.00336872	0.00794276	-0.0266971	0.0505403	0.0107753	0.0134432	0.0100224	0
246	0.0204584	0.0609118	-0.0196703	0.0310643	-0.00843949	-0.0122041	0.0124401	-0.030297	0.0455588	-0.000267735	0
246.2	0.00852329	0.0040581	0.00158142	0.0274663	0.013394	0.00484549	-0.0523237	-0.0196807	-0.000733027	-0.0169134	0
246.4	-0.0337033	-0.0693781	-0.0120618	0.010953	0.0466751	-0.00151835	0.0402303	0.0393865	-0.0463174	0.00592883	0
246.6	0.00657265	-0.0115962	-0.00809866	0.0257144	-0.0478969	0.0149292	0.0307056	0.0210085	0.0166565	0.00905005	0
246.8	0.0141807	0.0172657	-0.00639832	-0.0197055	-0.0356123	0.00734337	-0.00812888	0.0369576	-0.00255398	-0.0210445	0
247	0.00524704	-0.0249794	0.00132935	-0.0117646	0.00818755	0.0101423	0.0010326	0.0092916	-0.0123861	-0.0114037	0

## Sheet: fly3
Time	gamma-L5	gamma-L4	gamma-L3	gamma-L2	alpha-L	gamma-R5	gamma-R4	gamma-R3	gamma-R2	alpha-R	stimulus			Time	gamma-5	gamma-4	gamma-3	gamma-2	alpha	stimulus
0											0			0	0.0221112	-4.23811e-05	-0.00108784	-0.0145267	0.0122771	0
0.2											0			0.2	-0.00203125	-0.000630094	0.0243721	-0.00248085	-0.00715611	0
0.4											0			0.4	-0.0039398	0.0119816	0.0182087	-0.0114802	-0.00759521	0
0.6											0			0.6	0.00952496	0.015183	-0.00830322	0.0127958	-0.0032477	0
0.8											0			0.8	-9.30735e-05	-0.0105005	0.00785489	0.00808683	-0.00857502	0
1											0			1	-0.00273105	-0.0109507	-0.00617714	-0.0117732	-0.00426225	0
1.2											0			1.2	0.0020514	0.000875121	-0.00221954	0.00436228	0.00371597	0
1.4											0			1.4	-0.00100165	0.00851691	0.00490612	0.0122532	0.00361559	0
1.6											0			1.6	-0.00351602	0.0126944	-0.014289	0.0181348	-0.00609343	0
1.8											0			1.8	-0.00693561	0.00313031	0.00946357	0.0147584	-0.0118925	0
2											0			2	-0.00435463	-0.0154283	0.000742344	-0.0162845	-0.0053806	0
2.2	0.0169279	-0.0154924	0.00490538	0.0300594	-0.0279986	0.000354038	0.00652761	0.00514509	0.0221027	0.0234672	0			2.2	-0.0042602	0.000158085	0.00191707	-0.0130349	0.0090386	0
2.4	0.0219269	0.0185208	-0.00982255	-0.00211579	-0.03841	0.0110405	0.00141764	-0.0376561	0.0029778	0.0278402	0			2.4	0.000863769	-0.00146107	-0.00281229	-0.0109479	0.00595268	0
2.6	0.00537691	0.00347939	-0.0121711	-0.0253092	0.0127916	0.0382808	0.0341261	-0.0104356	-0.0190928	-0.0254541	0			2.6	0.00621494	-0.0068785	-0.00572542	-0.0162632	-0.00838492	0
2.8	0.0073595	-0.0273459	-0.00889778	-0.00659468	0.0484186	0.0162464	0.051208	0.0280243	-0.00187868	-0.0192	0			2.8	0.00978358	0.0115677	0.0103776	0.0081632	0.00908616	0
3	-0.0118986	0.0615659	-0.0104241	0.0149265	0.042669	-0.01098	0.00535486	-0.0227578	-0.0289692	-0.0127655	0			3	0.00291229	0.00447876	0.010898	0.00836072	0.0132489	0
3.2	0.0205261	0.0153825	-0.0169316	0.0186385	0.0224511	-0.0348886	-0.0246461	-0.00272542	-0.0289009	-0.00904409	0			3.2	-0.00019093	0.00711308	0.00137321	-0.00798906	0.00261186	0
3.4	0.0122012	-0.00126397	0.0240223	-0.0143815	-0.000477817	-0.0381808	-0.00774682	0.00689492	0.00496799	0.0348606	0			3.4	0.00439772	0.00969116	0.00884176	-0.00837334	0.0177361	0
3.6	-0.027147	0.0427624	0.0432186	-0.0395011	-0.0266008	-0.0291358	-0.0201977	-0.00267618	0.0167392	0.0525108	0			3.6	0.00322387	0.0119246	0.0203244	0.00402397	0.00576103	0
3.8	0.00101274	-0.0118891	0.000977676	-0.000515409	-0.0316115	-0.0227282	-0.0680173	0.0494549	0.00454325	0.0195772	0			3.8	0.0225151	0.00641351	-0.00649158	0.010218	-0.00465071	0
4	0.0167205	-0.011171	0.0189853	0.0507137	-0.00219498	0.00108815	-0.0557313	0.0324744	0.0125952	0.0242525	0			4	0.00813172	0.00487217	-0.00515893	0.0136244	0.00113988	0
4.2	0.015425	-0.0364068	-0.00181196	0.0387727	-0.00327084	0.00994104	-0.0428668	-0.00498627	0.0425881	-0.040549	0			4.2	0.00120692	-0.00863562	0.00220237	0.0180353	-0.019585	0
4.4	0.00394985	-0.0213185	-0.0243857	0.00988557	-0.0321663	-0.0203486	0.000500059	0.0102725	0.00516927	0.0334802	0			4.4	-0.00235333	-0.00903926	-0.00776931	0.00247644	0.00442322	0
4.6	0.0082691	-0.0183777	0.00540481	-0.0245502	-0.0349622	0.00535643	-0.0297789	-0.0262466	-0.00702988	0.00250015	0			4.6	-0.00536669	-0.00459292	-0.0144923	0.00800153	0.00880272	0
4.8	-0.0112833	0.00280042	0.0107936	-0.0150869	0.0100937	0.0257066	0.0347228	-0.0675086	-0.0124575	-0.0550115	0			4.8	-0.000753079	-0.012402	-0.0282776	-0.00414119	0.00705732	0
5	-0.0302885	0.0290543	-0.0123844	0.0136572	0.0532222	-0.0116008	0.136773	-0.0259113	-0.0320577	-0.0294094	0			5	0.00578927	-0.0163483	-0.00722604	-0.0143424	-0.000231362	0
5.2	0.00116827	0.00474427	-0.000859334	-0.0153671	0.0377527	-0.00311368	0.0300381	0.0267181	-0.00527005	-0.0572436	0			5.2	-0.00910181	-0.0157087	-0.00242179	-0.00540415	0.00704805	0
5.4	-0.0136036	0.0416638	-0.0157633	-0.0285972	0.0010727	0.0420873	0.00581773	0.0203688	0.000104569	-0.00790849	0			5.4	-0.0166537	-0.012412	-0.0121134	0.00097575	-0.00796739	0
5.6	-0.0221961	0.026099	0.0430376	-0.000322387	0.0210881	-0.00853515	0.026309	-0.0228034	-0.00685832	0.0208546	0			5.6	0.000869246	-0.00655523	0.0149132	-0.022039	-0.0093718	0
5.8	0.0266993	-0.0299563	-0.00379676	0.00935411	-0.0149137	-0.0199435	-0.0555044	0.00351429	-0.0153338	0.00030547	0			5.8	-0.00048718	0.00801679	0.010666	-0.00104946	-0.00379794	0
6	0.0100735	-0.0444722	-0.0509266	-0.00643383	-0.027987	-0.00772684	-0.0525778	0.0327514	-0.0497913	-0.0216754	0			6	-0.00320671	0.00753676	-0.00231082	0.00763438	-0.0266501	0
6.2	-0.0321826	-0.0314554	-0.0393869	-0.00187221	0.00746844	-0.0108234	0.00872335	-0.0121307	-0.0341112	-0.0196129	0			6.2	-0.00452264	0.0163267	0.0287143	0.00919781	-0.0125206	0
6.4	-0.00178214	-0.0113288	-0.0266653	0.0124442	0.000435515	-0.023672	-0.0251743	-0.0423953	0.0151972	-0.00612853	0			6.4	-0.0027949	0.00544639	0.0165832	0.0174826	0.0188352	0
6.6	0.00425775	0.0235834	0.00721046	-0.00375606	-0.0228655	-0.0519088	-0.049741	0.0166552	-0.0308063	0.0056116	0			6.6	0.0121836	0.00299571	0.00505678	0.0115275	0.0216696	0
6.8	-0.0304063	-0.0236478	-0.0177917	0.00136642	0.00767019	-0.0156784	-0.0373288	0.016674	-0.0309075	0.011806	0			6.8	0.0178339	0.00846624	0.0221963	0.00358761	0.0216528	0
7	-0.00452915	-0.0253188	-0.0370165	-0.0165329	-0.0219822	0.0286738	0.0158793	-0.019737	0.000437441	0.0225772	0			7	0.0106363	0.0217691	0.0125756	0.00463355	-0.00109992	0
7.2	-0.0154731	-0.000510693	-0.00373641	-0.0160074	-0.0234606	0.0431178	-0.00692768	0.00374054	0.0370016	0.00911453	0			7.2	0.0222189	0.0295407	0.00852124	0.0235497	0.010577	0
7.4	-0.0117723	0.003303	0.0158646	0.0258289	0.0398047	0.0123858	-0.016293	0.0311455	0.0536432	0.00679709	0			7.4	0.0305822	0.0255614	0.0111047	0.0221567	0.0341927	0
7.6	0.0200824	-0.00261459	0.0184454	0.025558	0.0457757	-0.00665333	-0.00940211	0.0263442	0.0641431	0.0230525	0			7.6	0.0411413	0.0336677	0.0126835	0.0297135	0.0242082	0
7.8	0.00438977	-0.00118228	0.0325292	-0.0197864	-0.0229974	0.0143449	-0.0361325	0.00784716	0.072475	-0.00204453	0			7.8	0.0590338	0.0241368	0.0154373	0.0512226	0.0157674	0
8	0.00416595	0.00428575	-0.00419203	0.00979881	-0.0157527	0.00219234	0.0381734	-0.037529	0.0298049	-0.0480019	0			8	0.0449688	0.0352649	0.0184665	0.054852	0.00808011	0
8.2	0.0106722	0.0176102	-0.0216281	-0.00166193	-0.00802133	0.0138734	0.0515594	0.0207547	-0.00900702	-0.00288624	0			8.2	0.0308604	0.052558	0.0334062	0.0335688	0.0137758	0
8.4	0.0275663	-0.00657715	0.00876362	0.00294726	-0.00528432	0.0219146	0.056452	0.0323664	0.00686938	0.0161386	0			8.4	0.0382407	0.0442321	0.0580387	0.0284814	0.0237351	0
8.6	-0.0222831	-0.00848085	-0.00348926	-0.0157014	0.00916912	0.00824828	0.033364	-0.0111591	-0.0313029	-0.00667802	0			8.6	0.0428164	0.061036	0.0419331	0.0464931	-0.000826396	0
8.8	-0.0253507	-0.0068548	-0.00119322	-0.0116706	0.000927995	-0.0188994	0.0251081	-0.0125168	-0.0352989	-0.0339927	0			8.8	0.05297	0.0508231	0.0292787	0.0540662	0.00648205	0
9	0.0111946	-0.0191797	0.0388691	0.0139251	-0.0179569	-0.0237499	0.0266244	0.0304376	0.0250858	-0.00437098	0			9	0.051403	0.0197086	0.0406037	0.0174535	0.0291308	0
9.2	-0.0390436	0.00305851	0.0203668	-0.0271058	-0.0048737	0.00291047	-0.0244636	0.0164835	-0.00138902	0.0462503	0			9.2	0.0441695	0.0185928	0.0451089	0.0250941	0.0152249	0
9.4	0.0224069	0.0234131	0.00537775	-0.0316919	-0.0131126	-0.0017997	-0.024084	-0.0609421	-0.0230381	-0.0398696	0			9.4	0.0483403	0.0328324	0.0455693	0.041081	0.0259052	0
9.6	0.0387862	0.0587066	-0.024839	-0.00361413	-0.012894	-0.0142314	-0.0435085	-0.0128152	0.00179377	0.0103979	0			9.6	0.0392336	0.0435433	0.0500758	0.0387615	0.0326982	0
9.8	0.015489	-0.0291086	-0.0217191	-0.00775229	-0.0261002	-0.0220263	-0.0193661	0.00540518	0.051433	0.0248156	0			9.8	0.0462224	0.0567073	0.0641058	0.0647133	0.0309072	0
10	0.0115919	-0.0460123	0.00151718	-0.00343039	0.0129419	-0.017852	0.0161274	0.000190428	0.0250247	-0.00192379	0			10	0.0470633	0.0600759	0.0701142	0.0733377	0.0337293	1
10.2	0.0113355	-0.00753543	0.00357213	0.0139558	0.0571571	0.00218709	-0.0163025	-0.0211489	-0.0286093	0.00627797	0			10.2	0.104721	0.0932507	0.108685	0.0865628	0.0372783	1
10.4	-0.0059683	-0.0220568	-0.00243838	0.0188884	0.0273885	0.0165538	-0.040218	-0.0567381	-0.0386656	0.0242395	0			10.4	0.158407	0.12627	0.146997	0.114283	0.066067	1
10.6	-0.00544948	0.0479623	0.00259549	0.0295752	-0.01097	0.00841517	0.0260327	-0.0120378	-0.0662976	0.0302898	0			10.6	0.131572	0.127814	0.136032	0.131757	0.0660997	1
10.8	0.0125112	0.0248108	-0.0152614	-0.00779805	-0.054172	0.0245052	-0.00433962	-0.00576374	-0.047867	-0.00354762	0			10.8	0.116627	0.133331	0.115124	0.10952	0.0341275	1
11	-9.89338e-05	0.0209619	0.0123449	-0.029626	-0.0361665	0.0641183	-0.00676432	0.0144413	-0.0480235	-0.0289175	0			11	0.111141	0.114277	0.0985236	0.0574929	0.0475068	1
11.2	-0.0228635	0.0319918	0.0179598	0.0172361	0.0219701	0.0278276	0.0112502	0.037518	0.00573138	0.00170602	0			11.2	0.0855575	0.112901	0.0815072	0.0636689	0.0346271	1
11.4	-0.00544547	0.00562375	0.0212374	0.0135052	0.050484	-0.00275376	0.0243194	0.02496	0.0247928	0.0101863	0			11.4	0.0729306	0.0805904	0.0600142	0.0531014	0.02591	1
11.6	0.00967297	-0.0300603	0.0178453	-0.0143147	0.0221645	0.0202686	0.0269528	0.037747	-0.00172289	0.000150637	0			11.6	0.0397985	0.0643029	0.0351695	0.0408214	0.00799171	1
11.8	-0.0104386	-0.0265218	-0.0234127	0.0320812	-0.0038354	0.00630397	0.0201286	0.0775375	0.0208943	0.0271345	0			11.8	0.0294305	0.0527019	0.0426412	0.0384199	0.0159288	1
12	0.0163847	-0.0039965	-0.004718	0.0160271	0.02266	-0.0263783	0.0199252	0.0135156	0.018827	0.000304785	0			12	0.0171944	0.0220915	0.0293528	0.0255068	0.00641541	1
12.2	0.018865	0.00741645	0.0160707	0.0178004	-0.00552244	-0.0282063	-0.0365546	-0.00421844	0.0629949	-0.0231102	0			12.2	-0.016932	0.037312	0.000296799	-0.00578099	-0.00934519	1
12.4	-0.00945253	0.0168414	-0.000548434	0.00527423	-0.0192043	-0.022411	0.0249049	0.00706022	-0.0214767	0.0149858	0			12.4	-0.0123563	0.0350099	0.00876694	0.0104497	-0.0108712	1
12.6	0.0239451	0.0206187	-0.00918341	0.0106598	-0.00522588	-0.00580838	-0.00752505	-0.0260334	0.00629375	0.0435336	0			12.6	-0.0179724	0.00506816	0.0164501	0.0214038	-0.0281429	1
12.8	0.0300283	0.00932836	-0.00791166	0.00151407	0.0125447	-0.0117224	-0.032539	-0.0237349	0.0909083	-0.00100883	0			12.8	-0.0211755	0.00167489	-0.000902178	-0.00883314	-0.0421122	1
13	-0.0185328	-0.0100833	-0.0128048	-0.0313261	0.0256814	-0.0156238	0.00107681	0.0118692	0.0171934	-0.0450858	0			13	-0.0365827	-0.00208887	-0.0100787	-0.00364284	-0.0416803	0
13.2	0.0105255	-0.019301	-0.0101856	-0.00763992	0.00568529	0.0251189	-0.104974	-0.0355578	-0.0629565	-0.0173434	0			13.2	-0.0451232	-0.0236622	-0.00912639	-0.0194426	-0.0412725	0
13.4	0.015792	-0.0159251	-0.010361	0.0253259	-0.0489401	-0.000340939	-0.0118599	-0.0365332	-0.0368248	-0.0171905	0			13.4	-0.0165353	-0.0225394	-0.0115488	-0.010644	-0.042049	0
13.6	0.011765	-0.0217591	0.0428054	0.0231196	-0.00221567	0.0201549	0.033886	0.0258691	0.00411373	-0.0224362	0			13.6	-0.0183821	-0.020106	-0.00391289	0.0141079	-0.0410208	0
13.8	-0.0114566	0.0113929	0.0394942	0.0141147	0.00632706	0.0220072	0.00216382	0.0121387	-0.0139167	-0.00845374	0			13.8	-0.0165171	-0.0033947	-0.00341784	0.00483619	-0.0191952	0
14	-0.0389312	0.0329016	0.0257935	-0.00875706	0.00607051	-0.0113186	0.0256179	-0.0336447	-0.00424327	-0.0148107	0			14	-0.0282895	-0.00922868	-0.0246366	0.00851283	-0.0319307	0
14.2	-0.0340478	0.015802	0.0277799	-0.0237075	-0.00467608	-0.0230465	0.0577156	-0.0314953	0.0288524	-0.00516926	0			14.2	-0.0322409	0.00209307	-0.010128	-0.00489403	-0.0588526	0
14.4	-0.00617969	-0.00775604	0.00250618	-0.0128224	-0.0329014	-0.00531009	0.024732	-0.0145374	-0.00311309	0.032719	0			14.4	-0.0117343	9.18152e-05	-0.0134248	0.000162141	-0.0427766	0
14.6	0.0100283	-0.0244648	-0.0106539	-0.00538539	0.0349528	-0.00856951	0.0193896	-0.00716888	-0.0426915	0.0147768	0			14.6	-0.0188762	-0.0311791	-0.0122134	0.0035742	-0.0274462	0
14.8	0.0349235	0.0178767	-0.0350318	0.0387683	0.0132692	-0.0401561	-0.0022026	0.0183272	-0.0143458	0.034235	0			14.8	-0.0273036	-0.0110672	0.00468594	0.000480552	-0.00363414	0
15	0.00290122	0.0155657	-0.0343535	-0.0084851	-0.0162492	0.00263289	0.00212059	0.0133711	-0.000907401	0.0349897	0			15	-0.0228566	0.00126362	-0.00449174	0.00420949	-0.0134017	0
15.2	-0.0359234	-0.0324043	-0.00756424	-0.0443412	-0.0100944	0.00949152	-0.0158504	0.00342452	0.0259008	-0.0117086	0			15.2	-0.0268051	-0.00846759	-0.00471691	-0.0055424	-0.0434236	0
15.4	-0.0372543	-0.044046	0.00772695	-0.0160316	-0.00508643	-0.010826	-0.0332338	-0.00716917	0.00441204	-0.0448468	0			15.4	-0.0285444	-0.0197571	-0.0161228	-0.0085666	-0.0498923	0
15.6	-0.0166008	-0.00981028	-0.019898	0.00643123	0.012489	0.00114898	-0.0127821	0.0138855	-0.0384343	-0.0280693	0			15.6	-0.0145998	-0.0112427	-0.0191501	-0.0190554	-0.0289605	0
15.8	-0.00765563	0.0100843	-0.0383539	-0.0144021	0.0304526	0.0103957	0.000385875	0.0676306	0.00253449	0.0116858	0			15.8	-0.0253202	-0.00342846	-0.0268903	-0.0226364	-0.0212502	0
16	-0.0178742	0.0108129	0.017763	-0.0389264	-0.0319712	0.0196256	-0.0118484	0.0272761	-0.00349753	0.0286296	0			16	-0.0230778	-0.00844631	-0.0301615	-0.0041644	-0.0300051	0
16.2	0.0189054	0.0103092	-0.0123166	0.00563738	-0.00501925	0.00188349	-0.0127227	-0.0261949	-0.0662863	-0.0533202	0			16.2	-0.0172774	-0.0095561	-0.00915704	-0.00458087	-0.0139313	0
16.4	0.0162437	-0.0178235	-0.00764691	0.017024	-0.0178669	-0.00802868	-0.0294931	-0.0156283	0.0264413	-0.0197922	0			16.4	-0.0133244	0.000650222	-0.0127802	-0.020715	-0.0156626	0
16.6	0.025412	-0.0315092	0.000556948	0.0152621	-0.024446	-0.0177425	0.00466613	5.05648e-05	0.0592785	0.000454901	0			16.6	-0.00901244	0.0052549	-0.0163882	-0.00793421	-0.0178076	0
16.8	0.0219222	0.0072297	0.022082	-0.0117031	0.00623107	-0.0127496	0.0148234	0.00143656	0.00497473	-0.00792775	0			16.8	-0.00398383	0.00745233	-0.0282245	-0.00573637	-0.0212781	0
17	-0.0152052	0.0230407	0.0286173	-0.0231431	0.0146025	0.00576234	-0.0354912	-0.00891579	-0.00240019	0.0371516	0			17	-0.0037869	-0.0082052	-0.0174817	-0.00848079	-0.0177411	0
17.2	0.00301626	-0.0178988	-0.0481955	0.0514258	0.016748	-0.00603938	-0.0179163	-0.0649829	-0.035552	0.0169129	0			17.2	0.00062417	-0.0249093	-0.00344875	-0.00559154	0.00771584	0
17.4	0.00335274	0.0325347	0.0158188	0.00532368	0.0138575	-0.0129884	-0.00154141	-0.0854264	-0.0107481	-0.0275015	0			17.4	0.0172885	-0.0128341	0.00972126	-0.00868685	-0.00434684	0
17.6	0.0106981	0.00890154	-0.00262173	-0.0223846	-0.047855	-0.00757087	0.047776	0.00321626	0.0669901	0.0279713	0			17.6	0.00523599	-0.00227486	0.0267438	0.00365182	0.0017348	0
17.8	-0.0107444	-0.0202848	-0.0244532	0.000582815	-0.00235593	-0.00352728	-0.00663165	0.036832	-0.00316803	0.0317967	0			17.8	-0.0120125	-0.00951809	0.0117199	-0.00708285	0.0113462	0
18	-0.0213249	-0.0291529	-0.0097943	0.0102982	0.0498963	0.0346388	-0.0601927	0.0395239	-0.0578779	0.0134488	0			18	0.0164247	0.0174025	0.0156664	-0.000454267	0.00410497	0
18.2	0.00694398	-0.0230766	0.00523491	-0.00639252	0.0231123	0.0441415	0.000903407	-0.00392124	-0.0062502	0.0236743	0			18.2	0.00893597	-0.00237381	0.0149412	0.0299851	-0.00564267	0
18.4	0.0187388	0.0290744	0.00925328	0.00379282	0.020025	0.000715477	0.049503	-0.0689532	0.00429838	0.00387437	0			18.4	-0.0186745	-0.00937256	-0.00423425	-0.000329747	0.00109254	0
18.6	-0.00460364	0.0671158	-0.0117966	0.0388667	0.0251889	0.00787737	0.00533166	0.0231903	0.00327739	-0.0109147	0			18.6	-0.00959347	0.00544778	0.000924603	-0.0212579	-0.000388827	0
18.8	-0.00440852	0.00656307	0.0104616	0.00143526	-0.0238563	-0.0720086	0.024494	-0.0215901	0.0320306	0.00299065	0			18.8	-0.0130327	0.0223696	-0.00626092	-0.00670795	0.0167398	0
19	-0.00813519	-0.00625405	0.0501225	0.0138478	-0.0163386	-0.00503646	0.00767481	0.0232808	0.0537653	-0.0255565	0			19	-0.00359221	0.0235464	0.000353543	-0.00146788	0.0154317	0
19.2	-0.00544449	0.035239	0.0311566	0.000701244	0.0207551	0.0392435	0.00716535	0.0374266	0.0265869	-0.0121813	0			19.2	-0.00472494	0.00603856	0.0122553	0.0167306	-0.0040037	0
19.4	0.00945647	0.0334864	0.00570762	0.00692901	0.0070952	0.0186167	0.0647447	1.49892e-05	-0.0269808	0.0156223	0			19.4	0.00893253	-2.20147e-05	0.00138769	0.014932	-0.00636828	0
19.6	0.0129956	-0.0177381	-0.00239059	0.0322201	-0.00143219	-0.00518307	0.0622884	0.00627055	-0.0244591	-0.0125881	0			19.6	0.0184823	-0.0180332	0.00389238	0.00247984	0.00387695	0
19.8	-0.000283877	-0.0311936	-0.017806	-0.0370385	0.035427	-0.0420589	-0.0279092	0.0120098	0.0250382	-0.0280313	0			19.8	0.00789718	-0.00846334	-0.00165304	-0.0031842	0.00553605	0
20	-0.00120695	-0.00126724	0.0334047	-0.0553412	-0.0238003	0.0276224	-0.0164014	0.00460276	0.00418016	0.00408588	0			20	-0.00831524	0.0166686	-0.017111	-0.00149708	0.00085542	0
20.2	0.0174771	-0.0216124	-0.00577487	0.00553503	-0.0747508	0.0171898	-0.00134941	-0.0368495	0.0416857	-0.0286406	0
20.4	0.0230386	0.000719907	-0.0109681	0.013603	-0.0459822	0.0193898	-0.031851	0.0744339	0.0203574	-0.0299395	0
20.6	0.0339477	-0.0133176	-0.0153733	-0.0171784	0.022682	0.0302437	0.00416383	0.0452034	-0.00708745	0.00791653	0
20.8	0.0381214	-0.0208297	0.00199437	0.00662153	0.00867076	-0.001635	0.0113742	-0.0378616	-0.0140077	0.0107572	0
21	0.001604	0.026795	0.0452046	0.0389969	-0.0414385	-0.0210604	-0.0614929	0.0315914	-0.0225252	-0.00272356	0
21.2	-0.0328201	0.00395728	-0.0131082	-0.0105561	0.0107431	0.00475856	-0.0218623	0.000172754	0.00346173	0.0239144	0
21.4	-0.010627	0.0156426	-0.0274288	-0.0169833	-0.0241212	-0.00562457	0.00756425	0.0283737	-0.0359499	0.0118103	0
21.6	-0.0227106	-0.0305208	-0.0163482	0.00922504	-0.0336926	0.0472654	0.00410476	0.0286619	-0.0107144	-0.0188081	0
21.8	-0.0272684	-0.0006436	0.0356141	0.00458225	0.0487283	0.044689	-0.00357507	-0.0151709	0.00804189	-0.0152341	0
22	-0.0326416	0.0191213	0.0102841	-0.00246966	0.0490875	-0.0203581	0.00906422	-0.0174693	-0.0255108	0.00743746	0
22.2	-0.0182109	-0.00661342	-0.0264516	0.00889968	-0.014384	-0.0415978	-0.00575819	-0.0116366	-0.00441895	0.0217574	0
22.4	0.0302554	0.0128418	0.0407503	0.00910749	0.0315551	-0.0205599	-0.0291655	-0.0385964	0.0603679	0.024671	0
22.6	0.0215726	-0.010683	0.0194351	0.0063701	0.0653871	-0.0246653	0.0465703	-0.00154563	0.00365966	0.000597821	0
22.8	0.0534419	0.0149238	0.00830514	0.00366282	-0.00011551	-0.0100963	0.0359876	-0.0132631	0.0046899	-0.020847	0
23	0.0147257	-0.00758356	0.0183642	0.00926442	-0.0134319	-0.0133179	-0.000245936	0.0103867	0.0501343	0.0798716	0
23.2	-0.0214013	-0.0103064	-0.0115698	-0.00604036	-0.0146907	-0.00924297	0.0272756	-0.0294306	-0.00438167	0.0439715	0
23.4	-0.0322398	-0.00132903	-0.0511851	0.00809251	-0.0179624	-0.0140138	0.031435	-0.0414424	-0.0488939	-0.0451008	0
23.6	-0.0261069	-0.0180513	-0.0314867	0.0137515	0.00128382	-0.0221241	-0.00916774	0.0159944	-0.0272898	-0.0114186	0
23.8	0.0202022	-0.00454941	-0.000227994	-0.0496467	-0.00957317	0.00677779	-0.0123487	-0.00986021	-0.0449396	-0.0165658	0
24	-0.0114764	-0.000868682	-0.0401747	-0.00578381	-0.027686	0.00828526	-0.0489268	0.00346286	0.0274129	-0.0443759	0
24.2	-0.0468976	-0.00473725	-0.0057622	-0.0109292	0.0133675	0.032326	0.00257527	0.000989128	0.0181949	-0.00693355	0
24.4	-0.0150125	-0.0146565	0.0192206	-0.0156089	0.00408318	0.0171645	-0.00363067	0.0132261	0.00347757	0.00772012	0
24.6	0.0261538	0.0285155	0.0021358	0.0253076	-0.00595724	-0.00585492	-0.00170488	-0.00175403	-0.00556811	-0.0312991	0
24.8	0.0162738	0.0591824	0.0115801	0.014551	0.0280012	0.0192522	0.0274002	-0.000424546	-0.00514341	-0.0451394	0
25	0.00482456	0.0323388	0.0411818	-0.018669	0.0334275	0.0266326	0.000513401	0.0616675	0.0287382	0.00898106	0
25.2	0.0337801	0.0269851	0.0201462	0.049582	0.00477602	-0.0276049	-0.0116309	0.0632151	0.0145868	0.0511051	0
25.4	0.0135603	-0.0591039	0.00418211	0.0033557	0.00694556	0.00549136	0.000380529	0.00888887	-0.0658257	0.0087007	0
25.6	0.0421864	0.00934004	0.00816323	0.021145	-0.0404309	-0.00230297	-0.00404778	-0.0173327	-0.0317827	0.0172163	0
25.8	0.0261527	0.0148086	0.00839463	0.0437627	-0.010091	0.000434745	-0.0505886	-0.0277529	-0.0124395	0.0492672	0
26	-0.0163236	-0.00891213	0.000977052	0.00373255	0.00460102	0.0105942	-0.014504	-0.0393664	-0.0269005	0.0360656	0
26.2	-0.0265341	0.0248107	-0.00266198	-0.0123636	-0.0264005	-0.00223341	0.0594633	-0.0195485	0.0130661	-0.0110252	0
26.4	-0.0101744	0.00848752	-0.00674256	0.0137818	0.00786706	0.00964823	0.0197586	0.018644	0.0450563	-0.0244465	0
26.6	0.0491973	0.00281399	-0.0141617	-0.025356	-0.0104674	0.0289193	0.00416385	-0.00237271	-0.0106664	0.0201152	0
26.8	0.00286436	-0.0334205	0.0100782	-0.0211115	0.00577484	-0.00832657	0.034045	-0.0240357	-0.0129085	0.0130344	0
27	-0.0276704	-0.011219	0.0430198	0.0110623	0.0296553	-0.0219506	-0.00955956	0.00148369	0.0232845	0.000863364	0
27.2	-0.0238223	0.0310642	0.0473411	-0.000485323	0.0201904	-0.0107026	-0.0197848	0.0273844	0.0091037	0.00948199	0
27.4	-0.0126752	0.0148984	0.00923715	-0.0241602	-0.013318	0.00200754	0.0043147	0.00421198	0.0171919	-0.00571087	0
27.6	0.00918917	-0.0291632	-0.0274384	-0.0217449	-0.014008	-0.00177962	0.00248486	0.00113797	0.0670182	-0.0327944	0
27.8	0.0124444	-0.0327322	-0.0187241	-0.0242543	0.0235213	-0.0151686	0.0178697	0.043911	0.0343657	-0.00745717	0
28	-0.0149183	-0.014327	-0.0149672	-0.00398569	-0.00355352	0.0255776	-0.00989483	-0.0300248	-0.00113659	0.0217936	0
28.2	0.00920395	0.0237932	-0.0126007	0.0242157	-0.0231324	-0.0122039	0.00686371	-0.00790513	0.00430624	0.000789476	0
28.4	0.00623171	0.00361068	0.0294836	0.0168112	-0.00839965	-0.0160382	-0.0240781	0.0594715	0.0117877	-0.0251294	0
28.6	0.00860623	-0.00952557	0.00749015	0.0141981	0.00313838	0.0132497	-0.00307853	0.0374337	-0.0380078	-0.0277937	0
28.8	0.0306236	-0.00207672	-0.0515942	0.0385829	0.0113417	0.0231433	0.0471347	-0.00141615	-0.0236984	-0.019672	0
29	0.0220663	-0.0031202	-0.030558	0.0276339	0.0201304	0.00885785	0.00929837	-0.00833508	0.057979	-0.00582076	0
29.2	0.0043925	0.0388605	-0.00175801	-0.0329582	-0.00689693	-0.0371056	0.00624875	-0.0711683	-0.0232062	0.011387	0
29.4	-0.0349003	0.00883771	-0.00199294	-0.0303273	-0.0181552	-0.0148392	0.0190204	0.000378846	-0.0460338	-0.00583691	0
29.6	-0.0208185	0.0182816	-0.00745145	0.00258321	0.0090976	0.0384082	-0.0144066	-0.00793488	-0.0312379	-0.0399649	0
29.8	0.00318713	0.00673215	0.0237233	0.0122476	-0.0273007	0.0181077	-0.0357436	0.0017798	0.0166707	0.0236174	0
30	0.0206547	0.00491759	-0.00320732	0.0230046	-0.0327377	-0.0389566	-0.015778	0.00925974	0.0106388	0.0448175	0
30.2	0.0101255	0.0266504	-0.0334426	0.0225709	0.00685816	-0.0294769	-0.00328635	-0.0412418	-0.0273649	-0.0143092	0
30.4	-0.0330103	-0.0215171	0.040462	-0.0275406	-0.0117471	0.0183435	-0.00317572	-0.0469189	0.00590654	0.00866617	0
30.6	-0.00624589	-0.0602975	0.0144478	-0.0443899	0.0353825	0.00135698	0.0215282	-0.0230927	-0.00167933	0.0144492	0
30.8	-0.0106655	0.00137953	-0.00309605	0.0061044	0.00584192	-3.73308e-05	-0.0390447	0.0257816	0.00889176	0.00268892	0
31	-0.0281692	0.0193895	-0.0177712	0.0349341	0.00113466	0.0122804	-0.0604992	0.00817203	0.0177375	-0.0156704	0
31.2	-0.0109808	0.0064548	0.00447925	0.00694171	0.020379	0.00789964	-0.0211577	0.0267828	0.00909445	0.00102251	0
31.4	0.013202	0.000962642	0.00911438	-0.00537631	0.0191589	-0.00983126	-0.000194627	0.0344524	-0.0199576	0.00208384	0
31.6	0.00706716	-0.00578449	-0.0265381	0.016741	0.00850021	0.00190395	0.0203464	-0.00133021	-0.0115393	-0.0392269	0
31.8	-0.00455844	-7.88849e-06	-0.00311509	-0.00176322	-0.00565448	0.0345724	0.0793671	0.0502373	0.0572977	-0.0281656	0
32	3.77802e-05	-0.0193299	0.00463206	-0.0398762	-0.0142086	-0.00775677	0.0447992	0.0259179	0.00897859	0.0065708	0
32.2	0.00676055	-0.013612	-0.00071984	-0.0712655	-0.0126633	-0.0018442	-0.0176938	0.0429065	-0.0487513	-0.0343319	0
32.4	-0.015306	0.0105459	-0.00826783	0.0108235	-0.0335158	-0.00171394	-0.0276995	-0.0212726	-0.0335168	0.00188332	0
32.6	-0.00906446	-0.00437279	-0.0120259	0.0316809	-0.0216432	-0.0171061	-0.032906	-0.1003	-0.00683265	-0.011922	0
32.8	0.032534	0.00141251	0.011243	-0.00671471	0.0225368	0.00822869	-0.0250878	-0.03752	-0.0162865	-0.0217644	0
33	0.0372096	0.0393643	0.046527	0.0227913	0.0152877	0.0415884	0.0109046	0.0324257	-0.00157421	0.0544735	0
33.2	-0.000147988	-0.0205797	0.0241529	-0.0310518	-0.0140962	0.00448799	-0.0042924	-0.0499789	0.0462843	-0.040975	0
33.4	-0.0358319	0.00551348	-0.0268637	-0.00111182	0.0297593	-0.0334896	0.0530799	0.0387378	-0.0161175	0.0817513	0
33.6	0.000475743	0.018257	-0.0290953	0.0184762	0.0256104	-0.00424969	0.0282415	-0.00550011	-0.00205906	0.0366653	0
33.8	0.00445758	-0.0302857	-0.00514781	-0.000140226	-0.0241259	0.000668943	-0.0190302	-0.0132034	0.0296453	-0.0418103	0
34	-0.0233097	-0.0250014	0.0074745	0.000279019	-0.0553133	-0.0111418	-0.0396001	0.0348081	-0.000902113	0.00573986	0
34.2	-0.0183059	0.0116395	0.00863084	0.0131237	-0.0240158	-0.00728464	-0.0306623	0.00893829	-0.0136441	0.0411002	0
34.4	0.000460881	-0.0276437	0.00994363	-0.00762274	0.0350844	-0.0247666	0.0177686	-0.00236216	0.0157783	-0.0122856	0
34.6	0.0253578	-0.0130735	0.0172347	-0.0231744	0.00472233	-0.014425	0.0177001	-0.00282254	-0.0149626	-0.0597233	0
34.8	-0.0020943	-0.0236576	0.00810492	-0.00916448	-0.0164044	-0.0113424	0.0464648	0.00814771	0.00820232	-0.022956	0
35	-0.0106668	-0.0186214	-0.0156439	-0.0335917	-0.025435	0.00793565	-0.00728417	-0.0391551	0.0221912	0.0238489	0
35.2	0.0103084	0.0375246	-0.0248788	-0.0480108	0.0238851	0.00220511	-0.0170359	0.0116859	0.0345804	0.031609	0
35.4	-0.000792122	0.0215883	-0.0182079	-0.000650865	0.0573532	-0.0249535	0.0150683	0.0569073	0.0310663	0.0257097	0
35.6	-0.0287271	-0.0377676	-0.00278515	0.0417112	0.0105382	-0.0136792	-0.026622	-0.0246249	-0.0159218	0.00878507	0
35.8	-0.00533581	0.0282175	0.0143981	0.0199271	-0.00665706	0.0203989	-0.0188195	-0.00221376	-0.0416703	-0.0243546	0
36	0.00499721	-0.0216429	-0.00850453	0.0100749	-0.0145963	0.0138797	0.0585631	0.0201735	-0.05309	0.00951766	0
36.2	0.00815961	-0.0179289	0.0285463	0.00361678	0.020907	-0.019975	-0.0380068	-0.0200244	-0.0558397	0.00899714	0
36.4	0.00922748	0.0359537	0.00377123	0.00075079	0.00738483	0.0252718	-0.0338649	-0.0252783	-0.00161925	0.0205863	0
36.6	-0.0067475	0.0274385	-0.0214734	0.0258372	-0.0275723	0.0209573	0.018382	0.0228643	0.0439618	-0.00494756	0
36.8	-0.0152816	-0.0278674	0.00511851	0.00600369	-0.0154645	-0.0316341	0.00228817	0.0368756	0.0111853	-0.0447494	0
37	-0.00478462	-0.0258237	0.00157215	-0.0586164	0.00143793	0.012827	0.00567339	0.0150778	-0.0522755	-0.00998424	0
37.2	-0.0183941	0.0202283	0.00371349	0.00249519	-0.00624883	0.0213142	-0.0487371	0.0325547	-0.0495049	-0.00985937	0
37.4	0.0086627	-0.00985959	-0.0291192	0.0201916	0.0255405	0.000563236	-0.0306778	-0.0189804	0.063361	-0.0209504	0
37.6	0.0134397	-0.0248429	-0.0257762	0.00925796	0.0184059	0.035662	0.00684608	-0.00878436	-0.00438972	0.0124985	0
37.8	-0.023812	0.00879924	0.0131291	0.0308028	-0.013187	0.0236646	0.0288411	-0.0284955	-0.00441142	0.0464192	0
38	-0.0127768	0.00587068	0.0138038	0.00807382	0.00172244	-0.0138375	0.0578343	-0.0678632	0.0361508	0.0301791	0
38.2	0.0293522	-0.0241797	-0.0226124	-0.0387173	0.0225504	0.00515068	0.0613807	-0.0362298	-0.0346219	-0.0166539	0
38.4	0.00114796	-0.00784695	-0.0258026	0.0137147	-0.0184189	0.0123506	-0.00827314	-0.00396137	-0.0313751	-0.0317071	0
38.6	0.00207085	-0.0227183	-0.00899884	0.0336979	-0.0286627	-0.0169686	-0.0597384	-0.0143494	-0.0131121	0.00529805	0
38.8	0.0136354	0.0349878	0.0116087	0.0109787	-0.0209896	-0.0229862	-0.0201986	-0.0376763	-0.00678008	-0.00188147	0
39	-0.0117536	0.0450858	0.00744187	-0.00360741	0.0081639	-0.000893972	-0.0102296	-0.0138948	0.0622497	-0.00412165	0
39.2	-0.0138657	-0.0111072	-0.0300709	0.00421739	-0.000745252	-0.00630191	0.00169123	0.0177054	0.0762659	-0.00595655	0
39.4	-0.00418568	-0.00791218	-0.0354757	-0.00687821	-0.00819992	-0.0342533	-0.00886669	0.0347357	0.000816023	-0.011325	0
39.6	-0.0169628	0.0388265	0.0106954	-0.0312623	0.0295491	-0.0318425	-0.0450245	0.0474129	-0.0310441	-0.00310699	0
39.8	0.013403	-0.00146054	0.0118421	-0.017855	0.0104882	-0.000911113	0.016746	0.0405697	0.00687757	-0.0111009	0
40	0.0221384	-0.00489385	-0.0194686	-0.0340905	-0.0236699	0.019879	-0.0298102	0.058915	0.0364833	-0.00445167	0
40.2	0.00886661	-0.0223999	0.0025184	-0.0235223	-0.0250569	-0.0217353	-0.0252038	0.0169472	-0.00433155	0.0374379	0
40.4	-0.0163147	-0.0253575	0.0255299	0.00887401	-0.0128385	-0.00383416	0.0576716	0.00512441	-0.0042975	0.0355513	0
40.6	-0.015238	-0.00804531	0.0360097	0.0287876	0.0114415	0.00405143	0.0737385	-0.0134416	-0.018193	-0.00111987	0
40.8	0.014273	-0.0160507	0.00761624	-0.00680418	0.00940318	-0.0354045	0.00224214	-0.0539916	-0.0496061	-0.0138432	0
41	0.032077	-0.0328608	-0.0450134	-0.053829	-0.0203113	-0.00818432	-0.0250828	-0.0138347	-0.0159942	-0.00147871	0
41.2	0.0210532	-0.00348461	0.016013	0.0131792	0.0219821	0.0122562	-0.000357275	0.0381364	-0.0382036	0.0153431	0
41.4	-0.0532921	-0.00375435	0.0099528	0.0315307	-0.00907585	-0.0153382	-0.0363421	0.019396	-0.0085117	0.00217248	0
41.6	-0.0248379	-0.0251581	0.0119625	0.0214905	-0.0138786	0.0235124	-0.0216408	-0.006241	0.0116763	-0.021186	0
41.8	0.0118554	0.0170907	0.0163118	0.0099167	0.00701503	0.0183835	-0.0121606	-0.0195215	-0.0142529	-0.0127612	0
42	0.0206392	0.0471357	0.00359614	0.0143145	0.00720373	-0.00509626	0.0011015	-0.0332717	0.00382718	-0.00925583	0
42.2	0.0387726	0.00888175	0.0017234	0.0290109	-0.00597289	0.0341131	0.0367337	-0.032328	0.0207693	-0.0285453	0
42.4	0.00123295	0.0168149	0.00170161	0.00661617	-0.0103851	0.0264285	0.00627259	-0.000299066	-0.0531099	-0.0110142	0
42.6	-0.0225021	0.0372991	-0.00350916	-0.0230844	0.0174618	-0.00547296	0.0131613	0.0325265	0.0113477	0.0127279	0
42.8	0.00350802	-0.00136056	-0.00686134	0.0286552	0.0284015	-0.000451261	0.0466153	0.0119355	0.00239947	-0.00467935	0
43	0.0195502	-0.00293765	-0.0179411	0.00682819	0.0347799	0.0154543	0.0148449	0.0132527	0.0265731	-0.0140794	0
43.2	0.000701663	0.0054291	0.00680718	-0.0318472	0.00643642	0.0135698	-0.0358575	-0.0069128	0.00661484	0.0133389	0
43.4	-0.00277169	0.000620493	0.0275486	-0.0245106	-0.00273431	-0.0110916	-0.0333638	-0.0202208	-0.0119812	0.0201759	0
43.6	0.00909486	-0.00380846	-0.00671203	-0.0128133	0.0171335	-0.0426388	-0.0161724	0.0161304	0.0618937	-0.0239005	0
43.8	-0.0216217	-0.0416311	-0.0121945	0.0177805	-0.0486408	-0.041001	-0.0246856	-0.0253258	0.013	-0.0420979	0
44	-0.00919705	0.019894	-0.0070613	-0.0494112	-0.0150436	-0.0116752	-0.000149004	-0.0433254	0.0110247	-0.0138819	0
44.2	-0.00515311	0.0297185	-0.00682597	-0.0117867	-0.0199751	-0.0604781	-0.0219403	0.0124623	0.00537013	-0.0150251	0
44.4	0.010357	0.00273382	0.0152014	0.0234733	-0.0472918	-0.0372296	-0.0282227	-0.0101142	-0.044054	0.0398566	0
44.6	-6.83122e-05	-0.0219065	0.0132582	-0.00354503	-0.0153843	0.0405386	-0.00208991	-0.0742841	-0.0304114	0.0461349	0
44.8	-0.0341247	-0.0224137	-0.000198629	0.00935873	0.0315732	0.0342188	0.00506748	-0.0521791	0.0172814	-0.0245247	0
45	-0.0163511	0.00965125	0.0271815	0.040153	0.0175305	-0.000252203	-0.00735875	0.00719392	-0.0162734	-0.00310921	0
45.2	0.0106368	-0.00666192	0.00377173	-0.0158757	0.00432516	0.0480415	-0.000666375	0.0264081	0.000114437	0.0304889	0
45.4	0.0435834	0.00106269	-0.00357511	0.00326447	0.0622782	0.0779599	0.0640059	0.0497404	0.0165403	0.0432763	0
45.6	-0.0262657	-0.0245051	-0.023395	0.0287584	0.0210216	0.0140827	-0.000353809	0.0265892	0.00951481	0.0229675	0
45.8	-0.0192516	0.0236776	-0.025326	-0.021681	-0.00508564	-0.00949196	-0.011957	0.0283614	-0.0233097	0.00186741	0
46	0.0246821	0.0692949	0.00194982	-0.0246747	-0.00845341	0.0133142	0.0333138	0.0237314	-0.0215841	-0.0172037	0
46.2	-0.0065928	0.0180088	0.002386	0.0269785	-0.0239642	-0.00653701	0.0117604	-0.00363808	0.030133	-0.0370045	0
46.4	0.0313137	0.0212509	-0.0127137	-0.0237625	0.0395939	-0.0111979	0.0436025	0.0376683	0.0298961	-0.0294426	0
46.6	0.00950388	-0.000747635	0.0373274	0.0127211	-0.039983	0.0101795	0.0266154	-0.0145801	-0.0266709	-0.0173601	0
46.8	-0.00499093	-0.0401267	0.00643362	0.0405409	-0.00512598	-0.00492648	-0.0179966	-0.00632858	-0.0159132	0.0119968	0
47	-0.00407243	-0.0119285	-0.0118504	0.0107057	0.0120802	-0.022373	-0.0382366	0.0255007	0.0151915	0.0218133	0
47.2	-0.0244837	-0.000251302	0.00421579	-0.0378749	-0.0189789	-0.0177771	-0.0320358	0.027882	0.00853638	0.00653171	0
47.4	-0.00655254	-0.0383498	1.24844e-05	-0.0491683	-0.02384	-0.0135221	-0.0083193	-0.00191801	0.0162985	-0.0137019	0
47.6	0.04315	-0.0373269	-0.00575746	-0.0246492	-0.0101048	-0.00724641	0.0147118	-0.0426707	0.0367729	-0.0184244	0
47.8	-0.0137304	-0.0188383	-0.000565957	-0.030899	0.0235688	0.0264854	-0.00846838	-0.0242975	-0.0121043	0.0142337	0
48	-0.00378531	-0.00830466	-0.022996	-0.0503576	-0.00497278	0.0361848	-0.0462723	0.0400968	0.0250434	0.038871	0
48.2	-0.00205565	0.00450453	-0.00684901	0.0278105	0.00276161	0.0124447	-0.0139105	0.0339651	0.014143	-0.0144577	0
48.4	-0.0114442	0.0450131	-0.0110624	0.0545122	0.0413887	-0.0178796	0.0136319	-0.0471652	-0.0129562	0.0155008	0
48.6	-0.0104168	0.0426302	-0.00100779	0.0134349	0.00943218	-0.0188928	0.0150691	-0.0416288	-0.0100496	0.0548855	0
48.8	0.000106661	0.00772752	0.0387487	-0.012723	-0.0294778	-0.00349258	0.0411963	0.0365899	0.0132142	0.0168273	0
49	0.0169519	0.0138741	0.00853166	-0.0217611	0.0101359	-0.0251047	0.0626882	0.0220774	0.0381818	0.0130552	0
49.2	-0.00266774	-0.0440968	-0.0317283	0.0473891	-0.0445932	-0.0560693	0.022593	0.010552	-0.000975018	-0.0366866	0
49.4	-0.023563	-0.0406544	-0.027666	0.0481786	-0.0127106	0.0137954	-0.0209447	-0.0358623	0.00271239	-0.0259331	0
49.6	-0.00230567	-0.0457114	-0.0195407	0.00187279	0.00863166	0.00593747	-0.000648522	0.0264138	-0.0437452	-0.0198435	0
49.8	0.0200088	-0.0118752	-0.0299161	-0.0402386	0.00239021	0.00837729	0.000337268	-0.00556588	-0.0292218	-0.00891851	0
50	0.014516	0.0433692	-0.0062378	-0.0303407	0.0131522	0.0357823	-0.0266974	-0.0461627	-0.0151552	-0.00525639	0
50.2	-0.00859711	0.0189504	0.0341433	-0.000755953	0.0166668	-0.00216009	-0.0142569	0.0521288	-0.0783914	-0.0372605	0
50.4	-0.0371297	-0.0149069	-0.00189273	-0.0294608	0.0017821	0.000892956	0.00335987	-0.00812175	0.00390357	-0.0233439	0
50.6	-0.0154625	0.0253355	-0.0141155	0.00749255	-0.00166186	0.00798283	-0.000863939	-0.0525318	0.0757582	0.0296083	0
50.8	0.0205446	0.00290598	0.0270802	0.047178	-0.00980834	-0.0144888	-0.0618592	-0.00169867	-0.0375253	0.00380301	0
51	0.00405826	-0.00141178	0.0132624	0.0381001	0.0146167	-0.0014291	-0.0561832	0.00859751	-0.0782143	-0.0106696	0
51.2	0.0119817	-0.0275021	0.00402505	-0.00723387	0.00645113	-0.0018216	-0.00440718	0.00953339	-0.0138358	0.0116721	0
51.4	0.0236239	-0.0365099	0.0251239	-0.0244804	-0.0266715	-0.0228271	0.0292374	0.00824475	0.0246021	-0.00196656	0
51.6	-0.0398007	0.0390539	-0.00947377	-0.00363975	-0.00467327	-0.000436028	0.0520435	-0.0355671	0.0630997	-0.0317621	0
51.8	-0.0393306	-0.00819908	-0.02513	-0.0300082	0.00711603	-0.00605568	0.0226002	0.00609255	0.0915244	-0.00792531	0
52	-0.0169453	0.000212343	0.0161338	-0.0452004	0.0381763	-0.0220573	-0.00259177	-0.0205164	-0.00327125	-0.0187895	0
52.2	-0.00208308	0.0189632	0.0315855	-0.0213196	-0.0251946	-0.00957389	0.0158327	0.0015341	-0.00245268	0.0286064	0
52.4	0.0176048	-0.0137678	-2.76222e-05	0.00455444	-0.0562278	0.0228501	-0.0171508	-0.00379164	-0.03743	0.0393255	0
52.6	0.0485162	-0.0167088	-0.029833	0.00382445	-0.017961	0.0163575	-0.0167973	-0.00322208	-0.0779157	0.00409194	0
52.8	0.0485736	0.0354876	-0.00579462	0.0167767	0.0147507	-0.00250979	0.0265038	0.0416031	-0.00887787	0.00973035	0
53	0.00196201	0.0457103	0.0424802	0.0430449	0.0404622	0.0311206	-0.032699	0.0154847	0.0249117	0.0153169	0
53.2	0.00277791	0.0313199	0.0144297	-0.01222	0.00824374	0.0112892	0.00677939	0.0257634	0.0243143	-0.00570181	0
53.4	0.0301246	-0.00290252	0.00835645	0.0429236	0.00713353	-0.0300142	0.0632503	0.0293719	-0.00596998	0.0264349	0
53.6	0.0147447	0.00446292	0.0123128	0.0762306	0.0113494	0.0308461	0.0333786	-0.0123141	-0.0341345	0.00869905	0
53.8	-0.00245322	0.0117531	0.0118378	0.0409824	-0.0014088	0.0405237	-0.0357154	-0.0188272	0.00858891	0.0111346	0
54	0.00721139	0.0189801	-0.00455949	0.0159989	-0.00494822	-0.0417895	-0.0538687	0.0159105	0.0405625	-0.00410842	0
54.2	-0.00138916	0.0385964	-0.0310782	-0.00173664	-0.00122863	-0.0422432	-0.019896	-0.00207255	0.00584857	-0.0578486	0
54.4	-0.022939	-0.00661663	-0.0159382	-0.0389595	-0.0170995	0.0227433	0.00540311	-0.0454269	0.0331502	0.038836	0
54.6	-0.00125886	-0.0313796	0.00574735	-0.00988904	-0.00993411	0.017984	0.0112705	-0.00283077	0.0191855	0.0258998	0
54.8	-0.00393353	-0.0401321	-0.0157445	-0.0152242	0.00762086	0.00500215	0.0124916	-0.0502761	-0.0190335	0.00798605	0
55	0.00773852	-0.016622	-0.000391161	-0.0287838	0.0124786	0.00465626	-0.0235414	-0.0142528	-0.0184558	-0.0173341	0
55.2	0.015188	-0.0117964	0.000916424	0.0109744	0.022932	-0.0201187	-0.0476848	0.00863622	0.00660916	-0.0250303	0
55.4	-0.0125306	-0.0149468	-0.0354407	0.0338433	0.0121093	-0.0197504	-0.0342914	-0.0243497	-0.0142065	-0.0124166	0
55.6	-0.0180483	0.0086677	-0.00583592	-0.0210316	-0.0286774	0.0319299	-0.0243524	0.0585511	-0.0449926	-0.0262652	0
55.8	0.0149045	-0.0300912	0.0361298	-0.034566	0.000956389	0.00143175	0.00449562	0.0466153	0.0170494	-0.00330985	0
56	0.0158906	0.0308239	-0.00584528	-0.00614543	-0.00612733	-0.0150855	0.00393692	-0.0126436	-0.0152906	-0.0210295	0
56.2	-0.00696013	0.0397914	0.0211564	0.00505228	-0.0286698	-0.00653271	0.0195741	0.0178424	0.028587	-6.50236e-05	0
56.4	-0.00821009	0.010854	0.0716059	0.0259057	0.0164206	0.00987469	0.0225482	-0.00079002	0.0584078	0.0560227	0
56.6	9.74798e-05	7.55579e-05	0.0432503	0.010621	0.0620877	0.00904633	0.00158402	-0.0272499	0.0162611	0.0567633	0
56.8	-0.00357774	0.00598234	-1.46173e-05	-0.0339641	0.0266293	-0.00527875	0.00358097	0.0367292	0.00605484	0.0153971	0
57	0.00505632	0.0400857	0.0156893	0.0113935	0.000233232	-0.001721	0.0425692	0.0326686	0.0121147	-0.0020735	0
57.2	0.0170104	0.029215	-0.00660998	0.0422174	0.0440052	-0.00622644	0.0738641	-0.0146699	-0.00804939	-0.050373	0
57.4	0.0170961	0.00408343	-0.0330328	0.0290648	0.0535086	0.0050231	0.0132048	0.00585218	0.0405611	0.0491073	0
57.6	0.0501923	0.0310387	-0.0212363	0.0418338	0.0618635	0.0512172	0.00303313	0.0472946	0.0570006	0.0376505	0
57.8	0.0593247	0.0686306	-0.00294567	0.0747981	0.046569	0.0758957	-0.0120154	0.0124989	0.0558938	-0.00686812	0
58	0.0203344	0.0576116	0.00151706	0.0636877	0.0331555	0.0455501	-0.012347	-0.0211489	0.0306132	0.00419764	0
58.2	0.0194239	0.0387768	0.0217348	0.0054754	0.0525617	0.00787808	0.0704304	0.0204304	-0.0276331	-0.00467001	0
58.4	0.0644234	0.0630942	0.0479405	-0.0128447	0.0151011	0.0137542	0.0734367	0.010485	0.010913	0.0688732	0
58.6	0.045688	0.056664	0.0231018	0.0642679	0.0192937	0.0595819	0.111391	0.00108083	0.00603595	0.0492411	0
58.8	0.0452309	0.0650122	0.0433182	0.0689514	-0.0184614	0.0804456	0.00987364	-0.000157386	0.0262009	0.0429311	0
59	0.0367198	0.0530239	0.0772237	0.045739	0.0423406	0.0492304	0.0235979	-0.0213078	0.000421831	0.0237936	0
59.2	0.029759	0.0247868	0.0753561	0.0696644	0.0770435	0.013036	0.0590432	0.0107545	-0.00937165	0.0139641	0
59.4	0.0288384	0.0375856	0.0385557	0.0840896	0.0140656	0.0186353	0.0036142	0.0351626	0.0305156	0.0488166	0
59.6	0.00749555	0.0653644	0.0139316	0.0420465	0.0402576	0.0331775	0.0448263	-0.031197	0.00889	0.0520314	0
59.8	0.0386045	0.044252	0.0623678	0.0288881	0.0398551	-0.00343163	0.00434546	0.0486087	0.0147339	0.0211485	0
60	0.0270165	0.0901483	0.0479697	0.0967294	0.072929	-0.0164647	0.0359953	0.0979906	0.0602812	0.021963	1
60.2	0.1355	0.171201	0.126307	0.146267	0.0925303	0.12167	0.087916	0.136083	0.103578	0.0604498	1
60.4	0.213316	0.187353	0.211002	0.169298	0.139301	0.190856	0.146898	0.164375	0.141776	0.0888368	1
60.6	0.17756	0.184352	0.198173	0.179933	0.143473	0.134526	0.187062	0.15908	0.176199	0.0708996	1
60.8	0.153299	0.193296	0.153233	0.152146	0.0846908	0.133012	0.155182	0.128121	0.155842	0.0417777	1
61	0.13819	0.158285	0.125046	0.109436	0.119007	0.14968	0.0956776	0.0730979	0.0614644	0.0569543	1
61.2	0.114822	0.208127	0.131417	0.11064	0.0977776	0.0723565	0.066425	0.0295119	0.0174127	0.0661916	1
61.4	0.110415	0.129274	0.115733	0.113974	0.0272614	0.0531151	0.0743362	0.0517381	0.0373084	0.0282952	1
61.6	0.08373	0.0789977	0.105499	0.0966515	0.0127955	0.0152779	0.0976769	0.0207021	0.016561	0.00940635	1
61.8	0.0600898	0.086758	0.0736773	0.0543183	0.0570265	-0.0132283	0.0770292	0.0328376	0.0372303	0.0241435	1
62	0.024109	0.0759033	0.0343107	0.0274881	0.0595546	0.00121618	0.0546465	0.058527	0.0535229	0.0190478	1
62.2	-0.0279989	0.0754074	0.0262027	0.00777942	0.0199555	-0.0137791	0.067282	-0.0157012	-0.0121334	-0.00790741	1
62.4	0.016525	0.0724566	0.0026689	-0.0537698	0.0443056	-0.0250325	0.00974428	0.024451	0.0438097	-0.0132155	1
62.6	0.0189676	0.0631407	0.056829	0.0345701	0.00834398	-0.0203182	0.00387239	0.0408152	-0.00363612	-0.047283	1
62.8	0.0217742	0.0379557	0.0271219	0.00952165	-0.0518677	-0.0503718	0.0318753	-0.0264947	-0.0447447	-0.0315829	1
63	-0.00690902	-0.0111729	0.0177241	-0.0130758	-0.0590213	-0.0521881	0.0421247	-0.00245583	-0.0348442	-0.0272972	0
63.2	-0.0167082	0.00747604	0.0225371	-0.00322912	-0.0413761	-0.0189251	-0.0290603	0.0468937	0.00446957	-0.0485659	0
63.4	0.00521002	0.0419082	-0.0109203	-0.00959748	-0.0443056	-0.0227274	-0.0750379	0.00527332	0.0312855	-0.0441774	0
63.6	-0.0173044	-0.024813	0.0159217	0.051982	-0.0261359	-0.0476754	0.0182537	-0.0115634	-0.000959539	-0.0346674	0
63.8	0.013799	0.0163906	0.0239908	0.0337859	0.0218899	-0.020069	0.00273805	-0.000631066	-0.0125105	-0.0414582	0
64	-0.0164576	0.0150169	-0.00190446	-0.000917658	-0.0275143	-0.045887	-0.00911687	0.0301534	0.0494178	-0.0499257	0
64.2	-0.0284412	-0.000434755	-0.0105704	0.0303692	-0.0308604	-0.079209	0.0145632	0.00818043	-0.0393131	-0.0473662	0
64.4	-0.0264161	0.0182494	-0.0243862	0.0338694	-0.0160075	-0.0340661	-0.0367618	-0.0529072	-0.0517251	-0.0454961	0
64.6	-0.0227875	0.0137021	-0.0350272	-0.00726945	-0.0123785	-0.0175381	-0.06178	-0.0334592	0.0319792	-0.00965256	0
64.8	0.00714976	-0.0183189	-0.00590538	-0.00812481	0.0241457	-0.080331	-0.00350228	0.0497963	0.00644543	0.0253591	0
65	0.00700027	-0.00397115	0.0199332	0.00231567	0.00710401	-0.0477528	-0.0344917	0.0250257	0.0173134	-0.0280822	0
65.2	-0.031358	-0.027379	0.0140785	-0.0140179	-0.0721338	-0.0084009	0.0585424	-0.0238245	0.00284969	-0.012774	0
65.4	-0.0305823	-0.0327228	-0.0194376	-0.0275229	-0.0510599	-0.0308505	0.0306182	-0.0188632	0.0300057	-0.0752089	0
65.6	-0.00972347	-0.0423133	-0.0241427	-0.0059101	-0.0320226	-0.0339587	0.0136269	-0.0342939	-0.0530976	-0.053885	0
65.8	-0.0157851	0.0061139	-0.0321093	-0.0209071	-0.0240291	-0.0125703	-0.0262774	-0.0389512	-0.0678747	-0.0154686	0
66	-0.0438421	0.0385599	-0.0518385	-0.0655536	-0.012708	-0.0209169	-0.0659113	-0.00175047	0.0411411	-0.0305252	0
66.2	-0.0558713	-0.0397372	-0.034959	-0.0522491	-0.030431	-0.0318417	0.0166632	0.0182966	0.0199088	-0.00799826	0
66.4	-0.0436872	-0.00568575	-0.0276119	-0.0293275	0.0108012	-0.00687677	-0.0220104	0.0235668	-0.0134857	-0.0539974	0
66.6	-0.041973	0.0101719	-0.0377295	0.00886737	-0.025158	-0.0289681	0.00195993	-0.028165	0.0330138	-0.0118677	0
66.8	-0.00137545	-0.0228865	-0.0497433	0.0250895	-0.0509075	-0.0195652	0.000409995	-0.0347394	-0.012436	-0.016031	0
67	0.00220404	-0.0446411	-0.020555	-0.00421953	-0.0253569	0.0238072	-0.0217636	-0.000625835	-0.0283401	-0.00679088	0
67.2	-0.00973383	-0.0353509	0.0109799	-0.0233847	0.00485233	0.00774678	-0.00540965	0.023012	-0.00717144	-4.29005e-05	0
67.4	0.0114465	-0.015686	0.0101218	-0.0224597	-0.0106909	-0.0361204	0.0113969	0.029008	-0.0365114	-0.0309355	0
67.6	-0.0144348	-0.0182305	0.0220809	-0.0423584	-0.0434356	-0.00526124	-0.00755062	0.00689463	-0.017522	0.0163786	0
67.8	-0.0399023	-0.0552141	0.0230864	-0.00490027	0.012478	-0.00063651	0.00640936	-0.0406895	0.0192374	0.0397875	0
68	0.0459357	0.0402475	0.00722504	0.00800181	0.035621	0.0351733	0.0294813	0.0120277	0.00673363	-0.0205585	0
68.2	0.0268228	0.00244168	0.0116169	0.0520861	-0.00624301	0.0250894	-0.00685848	0.00513485	0.0310263	-0.0141044	0
68.4	-0.00794533	-0.0420465	0.0095446	0.019359	-0.0286596	-0.0221065	0.00371579	-0.02024	0.00137109	-0.0106257	0
68.6	0.000652741	0.025982	0.0123448	-0.0319456	0.00684817	-0.0294452	0.0269152	-0.0131699	-0.0621788	-0.00926744	0
68.8	-0.0295352	0.0417869	0.0142425	0.00881948	0.0353867	0.00311574	0.0223035	-0.0249053	-0.0259169	0.0523385	0
69	0.00554712	0.018208	-0.0461756	-0.0255243	0.00529507	0.00766655	0.119639	0.0160283	0.00991978	0.0245857	0
69.2	-0.00185914	0.0024329	-0.0136177	0.00709487	-0.0260488	-0.0302773	0.00458067	0.0666892	0.0036059	0.0206615	0
69.4	-0.0298176	0.0233159	-0.0144156	-0.0130936	-0.0171449	0.0571871	-0.0378002	0.0332198	0.0283309	0.0563606	0
69.6	0.0151912	-0.0233088	-0.00131222	-0.00664033	-0.0136403	0.0713334	-0.0210484	0.0192755	0.0132605	0.0337646	0
69.8	0.0438593	-0.0312754	0.00821873	0.021206	-0.0174805	0.0012092	0.00184984	0.003932	0.00451155	0.00487673	0
70	-0.00451996	0.0349858	-0.00955412	-0.00563703	0.0194734	-0.0167163	0.00787466	-0.0296008	0.00741443	-0.00355011	0
70.2	-0.017786	0.0222195	0.00365317	-0.0275267	0.0555402	-0.0139052	-0.0516835	-0.014227	-0.0405009	-0.0399531	0
70.4	0.0123262	0.00646966	-0.00920303	0.00553959	0.00221586	0.001196	-0.0503709	-0.0500682	0.00297828	-0.00980434	0
70.6	0.00888938	-0.0282085	0.0132994	0.0297008	0.0164035	0.0271221	-0.0149108	-0.0456976	0.00510543	-0.0346246	0
70.8	0.00103323	-0.00936208	0.0263498	0.0187575	0.00761838	0.0171454	0.0063238	0.0161949	0.00955517	0.00391267	0
71	0.0034086	0.0114948	0.0123905	0.00914696	-0.0381258	-0.00459528	-0.0121019	-0.00678382	0.0453219	0.0379718	0
71.2	-0.00578666	-0.00412644	0.00869867	0.0104261	-0.0324637	-0.0151961	-0.0408592	-0.0239146	0.0567329	-0.00381816	0
71.4	-0.0131688	-0.0114653	0.0028205	-0.000981377	-0.00503328	-0.0181476	-0.0299682	0.0442819	0.0104471	-0.0344465	0
71.6	0.0034507	-0.00945757	-0.0208305	-0.0114762	-0.0378164	-0.00417578	0.00487613	0.0171261	-0.0282545	-0.00615736	0
71.8	-0.00652547	-0.0262118	0.0338561	0.005706	-0.00903803	0.00204636	-0.00412166	0.004911	0.0190554	0.0162579	0
72	0.00364857	-0.00532259	0.0186092	-0.0209481	0.0331984	-0.0167717	-0.000533658	0.0445276	0.0310219	0.0264231	0
72.2	0.0167804	-0.0120207	-0.0430917	-0.0416827	0.0299697	-0.0115261	0.0463468	0.009022	0.000159624	-0.00877334	0
72.4	0.0166755	-0.0121858	-0.0341585	-0.0192846	0.0418497	-0.00493935	0.0775065	-0.00955374	0.0104162	-0.0197368	0
72.6	0.0253226	0.0188715	-0.00120456	0.021164	0.0464089	-0.0139401	0.028631	0.00936761	-0.000255217	0.0138669	0
72.8	0.0350663	0.0227102	-0.0101075	0.0359351	-0.00497011	-0.00869694	-0.0545586	-0.0255276	-0.0648781	0.0213505	0
73	0.0119369	0.0204292	0.0264421	0.00355302	0.00753425	0.000254109	-0.0445703	-0.00868691	-0.0216527	0.00532377	0
73.2	0.0184869	0.0395157	-0.00467435	-0.0107364	0.0397144	0.0173793	0.0446028	-0.014868	-0.0258725	-0.0280748	0
73.4	0.028491	0.0259795	0.00392927	0.0345906	0.00957795	0.00262096	0.00265708	-0.0445521	-0.0197312	0.0100929	0
73.6	-0.0161702	-0.0172583	-0.0124674	0.0441079	-0.0397892	-0.0124702	-0.0229027	-0.0250359	-0.0211306	-0.0152765	0
73.8	-0.0570109	-0.021215	-0.023331	0.0382145	-0.0424127	0.0120067	-0.0155679	0.0207209	-0.0242776	-0.0453986	0
74	-0.0407161	-0.0132884	-0.00793863	0.0298524	-0.0151765	0.0375888	-0.0205632	0.0199494	0.00562808	-0.00876435	0
74.2	-0.0233104	-0.0259577	-0.0217604	-0.0336281	-0.00074635	0.00570054	0.0275546	0.00574387	0.00827217	-0.019449	0
74.4	-0.0169921	0.0635722	0.0625211	-0.0228427	0.0141286	-0.0284582	-0.00839079	0.0356984	-0.0490154	0.00474602	0
74.6	0.00979413	0.0368078	0.0204366	-0.00726413	0.00174302	0.0346972	0.0108934	-0.0358266	0.00340264	0.021553	0
74.8	0.0172747	-0.0321216	0.0180963	-0.0462293	-0.00877886	0.0158493	0.0363591	-0.0631708	0.0226831	0.00142657	0
75	0.00664145	-0.0152528	0.0154912	0.00106726	0.00706106	-0.0218983	0.0306354	0.000142302	0.0383768	-0.00602003	0
75.2	0.018271	-0.00680452	-0.0151391	0.0565687	0.0256737	-0.0247901	-0.0019794	0.0441206	0.0507724	0.0120992	0
75.4	0.0388908	-0.0292324	0.0115972	-0.00545448	0.0145825	-0.0358575	-0.0230549	0.0515184	-0.0123356	0.0273536	0
75.6	0.0300713	0.0450438	0.0246932	-0.0127707	-0.00540957	0.00425226	-0.0115308	0.0672058	-0.0330864	0.0365602	0
75.8	0.0306451	0.000289742	0.00360036	0.00305554	0.00677159	0.0279897	-0.0803529	-0.0150327	0.0387586	0.0209406	0
76	-0.0399798	0.0278051	-0.0065233	0.00791786	-0.026345	0.0237886	-0.00997279	0.0158492	0.0170829	0.0372596	0
76.2	-0.0349481	0.013244	0.00341106	0.0062382	0.00262782	-0.0255459	0.0165725	-0.0140325	-0.0126393	0.00507356	0
76.4	0.00635946	-0.00200672	-0.0259855	-0.0134997	0.0220642	-0.00829403	-0.00326665	-0.0324816	-0.0148441	-0.00522825	0
76.6	-0.00760051	0.0103845	-0.0387446	-0.0224734	-0.0157812	0.0341989	0.0229152	-0.00554341	0.00734517	0.0110869	0
76.8	-0.0147178	-0.0408876	0.0244635	0.0140735	-0.0129829	-0.00705338	0.013714	-0.0590212	0.0455744	-0.0364645	0
77	-0.00940987	-0.0181783	0.020754	0.0213067	-0.01506	0.0164653	-0.0165529	-0.00150213	-0.025514	-0.0280764	0
77.2	-0.00201834	0.0189193	0.0105767	-0.0365249	0.00607699	-0.0253999	0.00332848	0.0458515	-0.0701574	-0.00986912	0
77.4	0.00477822	0.00486994	-0.0330019	-0.0154263	0.0170446	-0.0332481	0.0417431	0.0109751	0.0208807	-0.0305948	0
77.6	0.00915389	-0.0163098	-0.0328703	-0.000186327	-0.0186235	-0.0231542	-0.0107552	-0.0533381	0.0149473	-0.0166376	0
77.8	-0.00717097	-0.0285783	0.00641241	-0.00534734	-0.0297238	-0.0185493	-0.0410314	-0.04993	-0.0488812	0.00528314	0
78	-0.0286996	-0.0303472	0.0034467	0.0190384	0.0176964	0.0101278	0.0195071	-0.00465663	-0.00318009	0.0123774	0
78.2	-0.02415	0.00363326	-0.0123081	0.00932736	0.0295926	0.031045	0.0152467	-0.00764581	0.0291406	0.0349907	0
78.4	-0.0293675	0.0214085	0.0110986	-0.0053427	-0.00514516	0.0178614	-0.00641959	0.0166299	0.0194016	-0.037743	0
78.6	-0.0016435	0.0290507	-0.01866	-0.0133326	-0.0137094	0.048641	-0.0268928	0.0353015	0.044715	0.0344296	0
78.8	0.0192848	0.0208071	-0.00807399	-0.0347386	-0.00875105	0.0321612	0.0339169	0.00746622	0.0246139	0.043321	0
79	0.0253825	0.0226468	0.0211146	0.000494347	0.00394869	-0.0328368	0.0406114	0.0206025	0.00875136	-0.0101361	0
79.2	0.0305747	0.0117763	0.0141554	0.0200363	0.013879	-0.0234717	-0.0060423	0.0423433	0.00824907	0.00472314	0
79.4	0.0216129	-0.00783987	0.0135842	-0.0186991	-0.0015735	0.039822	0.00993485	0.00371283	-0.00873964	0.0215957	0
79.6	-0.000511067	0.0289338	0.0227796	0.0432301	-0.0199927	0.00480069	-0.00991175	0.00735324	0.0208622	-0.0181292	0
79.8	0.000863673	-0.00369423	-0.0199187	0.0321949	-0.00640129	-0.0132259	-0.0318506	-6.45597e-05	-0.0150458	0.0143058	0
80	0.00574293	-0.0324426	-0.00384503	0.0274519	0.0160131	-0.0199279	-0.0317362	0.00903294	-0.0228375	-0.029608	0
80.2	0.0145643	-0.0300246	0.0167921	-0.011697	0.0481269	-0.00212121	-0.0234019	-0.00465231	-0.0421416	-0.0638283	0
80.4	0.0134526	-0.00201046	-0.00455601	-0.0142587	0.0504438	0.0163195	0.0165353	-0.00773815	-0.0369615	-0.00103592	0
80.6	0.0115124	0.006979	-0.00750383	0.0182573	-0.0100505	0.0128439	0.0378898	-0.000737627	0.00525612	0.0334242	0
80.8	0.0161098	-0.0138447	0.0240973	-0.0184891	-0.0474961	-0.00402386	-0.0121	-0.0400835	0.00315602	-0.0193111	0
81	-0.0119292	0.0239194	0.0157052	0.00323948	0.0285219	-0.0336504	-0.00541963	-0.0348069	0.00349227	0.0190723	0
81.2	0.0198237	0.0060757	0.0138853	0.0137893	0.0403709	0.0156963	0.0209085	0.0318461	-0.00845442	0.0425647	0
81.4	0.00940709	-0.0171419	0.0103366	0.0100567	0.0334318	0.00111178	0.0103046	0.0130455	-0.022141	0.0238648	0
81.6	0.000139716	0.0121737	-0.00769441	-0.00868057	-0.0238336	-0.00338401	0.0241556	-0.0338773	0.0238521	-0.0165592	0
81.8	-0.00475068	0.0226753	-0.0121316	-0.0161539	-0.0397046	0.0109499	0.0480933	-0.021895	0.055761	-0.014415	0
82	-0.0348186	-0.0100146	0.016309	0.0242099	0.0239193	-0.0242831	0.0216764	0.0171218	0.00805792	0.015297	0
82.2	-0.0263778	0.00104477	0.0187628	0.0531162	-0.00775794	-0.023957	-0.0204654	0.01921	-0.0148141	-0.0209038	0
82.4	-0.0250612	0.00991568	-0.0520734	-0.0222626	-0.0392613	0.0140194	-0.0515045	-0.0471826	0.00504431	-0.0353011	0
82.6	0.00349772	0.0178419	0.00195076	-0.0310632	-0.0243543	0.015259	-0.0233697	-0.0586833	0.0150115	0.0170099	0
82.8	0.0333826	0.0222176	0.0307445	-0.0220509	-0.0185483	0.00208546	-0.037223	0.0431077	-0.0121936	0.00397106	0
83	0.0159123	0.0168563	0.0020428	0.00235843	0.00267069	-0.0103843	-0.0105249	0.0950132	-0.0132602	-0.0224541	0
83.2	-0.0105689	0.00694221	-0.00548281	0.0241378	0.0225413	-0.00595804	0.0393455	0.0153584	0.0180777	-0.0316375	0
83.4	0.00147171	-0.00793032	0.00225066	0.00075723	-0.00143064	0.0117628	0.00549492	-0.0512445	0.030154	-0.0516645	0
83.6	0.00505114	-0.0225103	0.00560219	0.00705993	-0.0027483	-0.00138775	0.00747974	-0.0177795	0.0297131	-0.00709962	0
83.8	0.0129353	0.00879538	-0.021474	-0.00471249	-0.0194232	0.0211426	-0.0154645	0.00950154	-0.0155851	-0.0463538	0
84	0.0216739	-0.00604249	-0.0146008	-0.0020822	-0.0198617	0.0185414	-0.0442864	0.0590046	-0.0147312	0.0243223	0
84.2	0.012879	-0.0345592	0.00546832	-0.00348366	0.0152167	-0.000412042	-0.0400347	0.0341642	-0.0332062	0.0659321	0
84.4	-0.0151634	-0.0256121	0.012788	-0.0126188	0.0219422	-0.0100233	-0.00337304	-0.0323563	-0.0395202	0.0105733	0
84.6	-0.0411579	0.00486501	0.0130285	-0.00855824	-0.00507344	-0.00742311	0.0181014	-0.0249739	0.0150529	-0.0146891	0
84.8	-0.0376004	0.00611055	-0.000707295	0.00223649	-0.00899992	0.000760511	0.00968713	0.00806639	0.0341746	0.00286975	0
85	-0.00840561	-0.0369846	-0.0254973	0.00397712	-0.026036	-0.0102922	0.0206217	-0.0197048	0.000595153	-0.000792356	0
85.2	-0.015658	0.0154398	-0.0218956	-0.00860876	0.0171793	-0.0114205	-0.0220882	0.0015395	-0.00460499	0.0520126	0
85.4	0.00190828	0.04321	-0.00796294	0.0204556	0.0453192	-0.0150811	-0.00113358	-0.00454437	-0.0401788	-0.00938555	0
85.6	0.0213096	0.0126044	0.00669306	0.0157519	0.00481229	-0.00338342	0.0248239	-0.00807592	-0.0305756	-0.0438912	0
85.8	0.00361992	-0.0218492	0.0330513	-0.0122431	-0.0319865	0.00566135	0.0140558	0.00332497	0.0216037	-0.00182469	0
86	-0.00675001	-0.0151197	0.0414814	0.0153157	-0.0193849	-0.0256769	0.0135104	0.0142842	0.025261	-0.0081781	0
86.2	0.0153459	0.0283941	0.0043291	0.0366571	-0.00258676	-0.0433743	0.0103134	0.044023	0.0103835	0.00401044	0
86.4	0.0053406	0.00048562	0.00457758	0.0116011	0.0431483	0.0224862	0.0414782	-0.0212725	-0.00270042	0.0407045	0
86.6	0.0266554	-0.00530777	-0.00295772	0.00632875	0.00807937	0.0329287	0.0292895	0.015555	0.0213031	-0.0365227	0
86.8	-0.00233968	-0.0160612	-0.0291972	-0.00884337	-0.0259353	0.0136684	-0.0135241	0.0306422	0.0586929	-0.0158017	0
87	-0.0306356	-0.00817158	-0.0430539	-0.0331855	-0.0108979	0.0207563	-0.0233886	-0.000843563	0.0457734	0.0379568	0
87.2	0.00303616	0.0212829	0.00852138	-0.0156113	0.0106068	0.0294938	0.0125604	0.00168615	-0.0297832	0.00181625	0
87.4	0.00989048	0.00550751	0.0649566	0.00993514	0.00598955	0.0104877	0.02671	0.00706511	-0.0608823	-0.0217837	0
87.6	-0.0266632	-0.0312611	-0.0178473	-0.0357247	-0.0168148	8.48343e-05	-0.0192435	-0.016069	0.0226642	0.00307749	0
87.8	0.0143668	-0.044141	-0.0421535	-0.0260235	-0.000634501	0.0261959	0.00149039	-0.0306353	0.010858	0.097981	0
88	-0.00721548	0.0206043	-0.0111893	0.0166092	-0.0218834	-0.0112136	0.00369588	-0.0212667	0.0382381	0.0233828	0
88.2	0.0170586	0.0405988	0.0165739	0.00572013	-0.00267056	-0.00155616	-0.0495719	0.0534373	-0.00780159	-0.0165786	0
88.4	0.030851	0.0333812	0.00517881	-0.00918897	0.0290462	0.0272478	-0.0442606	0.0388884	-0.0616019	-0.0224983	0
88.6	-0.0205786	0.0341877	-0.022454	0.0123151	-0.00199868	-0.00399928	0.0169178	-0.0854945	-0.00403365	-0.0470379	0
88.8	0.0114667	-0.0316933	-0.00577004	-0.003204	-0.023398	-0.0179513	0.00158373	-0.0461232	0.00829073	0.0427965	0
89	0.00178684	-0.039095	0.0289696	-0.0205696	-0.011494	-0.037603	-0.00895696	0.0976995	-0.0288013	-0.00493983	0
89.2	-0.00878504	0.00873742	0.00263184	0.0230882	-6.29739e-05	-0.0158019	0.00737962	0.00594542	0.0101635	-0.0282877	0
89.4	-0.0275279	-0.0030165	0.0101673	-0.00123053	0.042979	-0.0113994	-0.0223115	-0.0150862	0.0248969	-0.051223	0
89.6	-0.00613156	-0.0225771	0.0186647	-0.0103383	0.0591485	-0.0204707	0.0191046	0.0242942	0.00473499	0.0040854	0
89.8	0.00756547	-7.47084e-05	-0.0254296	0.0186636	0.0205878	-0.000731426	0.0492266	0.0141082	0.0163833	0.0429336	0
90	-0.0260013	0.010028	-0.0445693	-0.00973965	-0.014727	0.00422672	-0.0333689	-0.0165881	-0.0019258	-0.0202296	0
90.2	0.00750525	-0.00470699	0.0150301	-0.0250407	-0.0123984	-0.0328079	0.00297879	-0.0854163	-0.0845328	0.010849	0
90.4	0.0295334	-0.00974741	0.0411371	0.00648254	0.0320439	0.0255047	0.0570635	-0.00129086	0.00885879	-0.029398	0
90.6	0.0139084	0.0200235	-0.0134455	0.0257261	0.0122036	0.00974913	0.00795393	0.018902	0.0254345	-0.000863047	0
90.8	-0.0197037	0.00680332	-0.0137872	0.0315782	-0.0222621	-0.00211925	-0.0299118	-0.0059917	0.0242468	0.0961582	0
91	-0.0172805	0.00878236	0.0126766	0.0201809	-0.0272778	0.00188828	-0.0128017	0.0224206	0.0172709	0.0406181	0
91.2	0.00553484	0.029647	0.00138914	0.000447752	-0.0192888	0.00445622	-0.00209141	0.028526	-0.0284197	-0.0691088	0
91.4	-0.00483177	-0.0123792	0.00573287	0.00130392	-0.0076968	0.0359232	-0.0264452	-0.0375558	-0.00829792	-0.0190543	0
91.6	-0.00574014	-0.0175327	0.0022044	0.00406403	-0.0114359	0.00574872	-0.064407	-0.0312841	0.0525918	-0.0470091	0
91.8	-0.00183016	-0.0241771	-0.0371376	-0.00484224	-0.0481118	0.0015148	-0.0192462	-0.0280485	-0.019691	0.0131943	0
92	-0.00981501	-0.0241586	-0.00991184	-0.0444757	-0.0112386	0.000115411	0.0253611	-0.0187903	-0.0218871	0.00696389	0
92.2	-0.016151	0.0200867	0.0191021	0.000884985	0.0277476	-0.0201288	-0.0101292	0.0103962	-0.0214907	-0.0122853	0
92.4	0.00663196	0.00928392	0.0115907	0.0381087	0.00580159	-0.0139216	-0.0419137	0.00422027	-0.0176956	-0.00337893	0
92.6	0.0299938	-0.0523063	0.00925933	0.00647217	-0.011307	0.0119292	0.00212062	-0.0404439	0.0206584	-0.0293097	0
92.8	0.0104528	-0.0134704	0.00613444	0.0335121	0.0131773	-0.00239093	0.0454004	-0.0344136	-0.0283779	-0.0320261	0
93	0.00908545	0.00373793	0.0101602	-0.0384712	0.0131833	-0.00387195	0.0489738	0.0013982	-0.0251988	0.0242274	0
93.2	0.0132983	0.0501073	0.00127092	-0.0132516	-0.02463	-0.00854689	0.0131613	-0.041917	-0.00328147	-0.0333479	0
93.4	-0.0312595	0.0142121	-0.0340043	-0.0141269	-0.00788691	-0.00500702	-0.031392	0.00977183	0.0330082	0.00925838	0
93.6	-0.0185257	-0.0263633	-0.0215769	-0.0361484	0.00304689	-0.0202816	-0.00294274	0.0581945	-0.00677791	0.0413334	0
93.8	0.0412119	-0.000376017	0.0154862	-0.0225967	-0.0114613	-0.0038122	0.0214449	0.0100509	-0.0230174	-0.00537429	0
94	0.019393	-0.00185725	-0.00271284	-0.0122298	0.0172566	0.0426999	-0.021872	0.0128247	0.056245	0.0225645	0
94.2	-0.0239983	-0.0299222	-0.0174129	0.0141516	0.0353262	-0.00993912	0.000444664	0.0618421	-0.00892056	0.0439947	0
94.4	-0.0268737	0.00800694	-0.00486817	0.0222222	0.0121697	0.00802592	-0.0349936	-0.0266618	-0.049822	0.0275755	0
94.6	-0.0228385	-0.00751926	0.0517215	-0.0226112	-0.0118285	-0.00923732	0.00747297	-0.0154746	0.000935498	0.0233331	0
94.8	0.00317489	-0.0113993	0.0221478	-0.0144154	-0.00485889	-0.0256116	0.00691067	0.0100937	0.00456342	-0.0120405	0
95	0.0317565	0.0270883	-0.0226304	0.00534952	0.0241374	0.011809	-0.0225063	-0.0139323	-0.0127412	-0.00181594	0
95.2	0.0180601	0.0235163	-0.00574369	-0.0109192	0.00869585	0.023555	0.0128961	-0.0193633	0.0031535	0.0126876	0
95.4	-0.0178049	-0.0184757	-0.0117778	0.0151828	-0.0449857	-0.0185844	0.041922	0.00882397	-0.0175465	-0.0519529	0
95.6	-0.0193375	0.00267711	0.00454632	0.0347606	-0.00299116	0.005925	0.0289225	0.0676189	-0.0164882	0.0277702	0
95.8	0.00483749	0.0180644	0.0128216	0.00625097	0.00301289	0.00550266	-0.038736	0.0518298	0.0461221	-0.0205423	0
96	0.0237334	0.00636306	0.0229284	0.0105279	-0.0327981	0.00836356	-0.0399964	-0.0222345	0.0248903	-0.0381307	0
96.2	0.00242779	0.0210223	-0.0255341	0.0277877	-0.00149879	0.00425073	0.0166108	-0.0456989	0.0275274	-0.00367105	0
96.4	-0.0269091	0.0319288	-0.0262574	0.0114276	0.016405	0.00272467	-0.00980703	-0.00834586	0.0149357	0.00737682	0
96.6	-0.0152546	-0.00477443	0.0463097	-0.0122716	-0.00792855	0.00304011	-0.0379885	-0.00276714	-0.0355432	-0.00296752	0
96.8	0.0145588	-0.0180839	0.00372128	-0.0134342	0.0567318	-0.0338598	0.0843252	-0.0304505	0.0458699	-0.0154605	0
97	0.0247611	0.0122787	0.0110081	-0.0143499	0.00457623	-0.0219299	0.0199161	0.0130062	-0.0108927	0.0100824	0
97.2	0.00936718	-0.00916728	0.0191328	-0.000694707	-0.0158523	-0.0202036	-0.0266111	-0.00576146	-0.00831749	-0.0171598	0
97.4	0.0371297	-0.0127486	-0.00232808	-0.00248955	0.0345328	0.0124503	0.0040299	-0.00195784	0.0254368	-0.00200403	0
97.6	0.0433147	0.00764307	-0.00361337	0.0161473	0.0275912	0.0316511	0.0297619	0.0249874	0.000848195	0.0490468	0
97.8	-0.00152458	0.0152897	0.00887391	0.034482	0.00115377	0.0144233	0.00947375	0.0116222	-0.0165072	0.0677945	0
98	-0.0144143	0.0284826	-0.00621932	-0.00354058	0.0248126	0.00624167	-0.00317327	-0.00527041	0.0139636	0.0278444	0
98.2	-0.00253945	0.0246752	-0.0126916	-0.0183962	-0.0365212	-0.0145556	0.0308474	-0.000619627	-0.0073915	-0.0724193	0
98.4	-0.0102791	-0.0410277	-0.0179659	0.00395209	-0.0183595	0.00229664	-0.0256715	-0.0279442	-0.0148394	-0.0538402	0
98.6	-0.0298415	0.0220257	-0.0170413	-0.00693603	-0.0165879	0.00363413	-0.0626336	0.0120536	0.00352323	0.030138	0
98.8	-0.00282558	0.0160889	0.00736169	-0.00820619	-0.0353945	-0.00140388	-0.00994143	0.0228204	0.000678698	0.0223969	0
99	-0.00147193	-0.02269	-0.000420076	0.00617794	-0.0214905	0.00386602	0.0537129	0.0068887	-0.0114925	-0.0126048	0
99.2	-0.0324442	0.0221586	-0.0271289	0.00591075	-0.000536831	0.0173187	0.0330021	-0.0103658	-0.000790094	0.00328992	0
99.4	0.00614366	-0.000390458	0.0104713	-0.00249784	-0.0122105	0.0313078	-0.0181168	-0.0489323	0.0262583	-0.00502358	0
99.6	0.00532202	-0.020198	0.0174813	-0.0350595	-0.0114577	0.0154068	0.0256259	0.0405919	0.0588092	-0.00839403	0
99.8	-0.0163641	0.0137327	-0.0375132	-0.0317952	0.0232016	0.0139203	0.00554656	0.0134928	0.0183439	-0.0404823	0
100	0.00644831	-0.00577945	-0.00758486	-0.0101424	0.0581409	-0.0143239	-0.0348314	-0.0208808	-0.0214815	-0.0072867	0
100.2	0.00523183	-0.0280849	0.0187191	0.00398982	0.0187988	0.00461494	-0.044895	-0.0289512	0.0220877	0.0336214	0
100.4	-0.0114632	-0.0249686	0.00655421	0.000420847	-0.0307618	0.0190115	-0.00667064	-0.0134664	0.0114597	-0.0151614	0
100.6	-0.00869726	-0.0506863	0.0229434	-0.0131562	-0.0200309	-0.0364627	0.0285648	0.022932	-0.0751553	-0.0564544	0
100.8	-0.0353207	-0.0525345	-0.00137912	-0.0150154	-0.0305225	-0.0233604	-0.00909388	-0.00742639	-0.0378271	0.0194429	0
101	0.0264236	0.00985202	-0.0246245	-0.00807592	-0.020288	-0.00743897	0.0171976	-0.0219191	-0.0815089	0.014987	0
101.2	0.00233409	0.0125061	0.0143602	0.0203222	0.0173282	-0.0324356	-0.0171994	0.0322238	-0.018312	-0.00742985	0
101.4	-0.00839186	0.00922291	-0.000926008	-0.0101471	0.00643042	0.0131419	-0.00675037	0.052928	0.050188	0.0201943	0
101.6	-0.0108116	-0.0163929	0.000436337	-0.0123116	0.00587152	0.0413718	-0.00500171	0.00787231	0.0170484	0.00428494	0
101.8	-0.0174272	-0.0170244	0.0434785	0.00964747	0.0149477	-0.00697329	-0.0309146	-0.0188903	-0.00394583	-0.0417429	0
102	0.0250801	0.058661	0.0137171	-0.0364257	-0.0221314	-0.0185358	0.0124775	0.00163575	0.0481949	0.0058077	0
102.2	0.00331005	0.0183481	-0.00217849	0.00541372	0.0097977	-0.007841	-0.00446931	-0.016597	0.0357057	0.0560916	0
102.4	0.0153756	-0.0139768	0.00466669	0.0624397	0.0135856	0.00553349	-0.0301944	-0.0625482	0.0212078	0.0152277	0
102.6	0.0546307	0.00230106	-0.0115741	0.0466191	0.0197269	0.0181528	0.00560425	-0.0105017	0.0173204	0.0140951	0
102.8	-0.0069013	0.0313273	-0.0409952	0.0326025	0.028333	-0.00224533	0.0296609	0.0158067	-0.0180364	0.0341432	0
103	-0.0486395	0.0160851	-0.0399256	0.0323849	0.00707387	-0.015279	0.0176832	0.00745951	-0.016957	0.0112525	0
103.2	0.0116203	-0.0125955	0.00363385	0.0119411	0.00393491	-0.0167411	0.0223431	0.0280623	0.0169041	-0.00951091	0
103.4	0.00753608	0.0181615	0.030853	0.000803008	0.0372887	-0.0492544	0.0149728	0.00503344	-0.0124679	0.013935	0
103.6	0.0125813	0.0303558	-0.0119882	-0.0186958	-0.0276229	-0.00839632	-0.0531694	-0.00781059	0.0240529	0.00476362	0
103.8	0.0246899	0.0185845	0.0230096	0.0156261	-0.0245535	0.000661079	-0.0101011	-0.00131141	0.0288672	-0.0377884	0
104	0.00941024	0.0123678	0.0130817	0.0186644	-0.0172075	0.0195725	0.0499615	-0.0137691	-0.0258873	-0.0189664	0
104.2	0.0034848	0.0121683	0.00367053	-0.00956866	-0.0208645	0.0245523	0.0145387	-0.0142029	-0.0501455	-0.0134779	0
104.4	0.00444362	-0.0139926	0.0110241	-0.00299419	0.010118	0.00529729	-0.0129786	0.0186694	-0.0187704	-0.0374443	0
104.6	-0.00404445	-0.0361681	-0.0165828	0.00958755	0.0304182	0.00576813	0.0237625	0.0276656	-0.0107962	-0.0106426	0
104.8	0.0177987	0.00127708	0.0180877	-0.0175399	0.00239947	-0.00181863	-0.0178861	-0.00404004	-0.0256286	0.00502746	0
105	0.00526121	-0.0163664	0.0233706	0.0174983	0.0264066	-0.00374164	-0.0372107	0.0218392	0.0460699	-0.0212666	0
105.2	0.0323717	-0.00706055	-0.00525773	-0.0145	-0.00299666	0.0637823	-0.00974994	0.0130981	0.0160225	0.0235754	0
105.4	0.0208418	0.016692	-0.0230908	-0.0182072	-0.0453963	0.0367041	0.0291518	0.0431768	-0.00120432	0.0557399	0
105.6	-0.0100875	0.00978834	-0.00164342	0.0252052	-0.0513415	-0.010326	0.0277432	0.024611	0.0166364	0.0216866	0
105.8	-0.0164585	0.0107947	0.0212267	0.0173328	-0.0110961	0.0111076	0.0219662	-0.0245374	-0.00994559	-0.00679778	0
106	-0.019942	0.0393195	0.0109152	-0.0272672	0.03004	-0.00781069	0.0378329	0.0237309	-0.0160498	0.0106908	0
106.2	0.0253349	0.00769966	0.00914651	-0.0178642	-0.0196589	-0.0146105	-0.0141083	-0.0366652	0.0240358	0.014094	0
106.4	-0.00351545	-0.0409879	-0.0247917	0.0246556	0.0292885	-0.0203724	0.0179064	-0.0444839	-0.0215927	-0.0344371	0
106.6	-0.00360605	-0.0212212	-0.00764002	-0.00211826	-0.00969436	-0.0144477	-0.0194119	-0.0134099	-0.0152782	-0.0230498	0
106.8	-0.0112685	0.0101878	0.0132652	-0.0273906	-0.00890516	0.00719724	-0.028452	-0.0187461	0.0295304	0.00207119	0
107	-0.0312829	0.0153042	0.00434122	-0.0111599	0.0420194	-0.0036368	0.0220287	-0.0378318	0.0322905	0.0330558	0
107.2	-0.0151881	-0.000751376	0.00105895	0.0215875	0.0121602	-0.0125941	0.013293	-0.00904415	0.00233006	0.0448153	0
107.4	-0.0149046	-0.0280643	-0.00246723	0.0514442	0.0113153	0.0349969	-0.0133288	0.026562	-0.0297397	-0.029437	0
107.6	-0.0153541	0.0201086	-0.00122721	-0.0240064	0.0388256	-0.0164909	0.000596605	-0.0158856	-0.0444493	0.012778	0
107.8	0.0187577	-0.0178716	0.000707018	-0.025978	-0.0153646	0.0250904	-0.00821084	0.0190468	-0.00982035	-0.00899223	0
108	-0.00573667	-0.0252034	-0.0232105	-0.0187149	-0.0452565	0.0233604	0.00262952	-0.00388586	0.035547	-0.0139016	0
108.2	-0.0442874	0.00907186	-0.00115976	-0.0202739	-0.00363816	-0.0317309	0.00733528	0.0188231	0.0133383	-0.0116933	0
108.4	-0.0206234	0.00297361	0.023299	-0.00247651	0.0287012	-0.0316357	-0.0266459	0.0745312	-0.0262494	-0.0381595	0
108.6	0.0188656	-0.0162644	-0.021321	-0.00301517	0.00571368	-0.00552293	-0.0301734	0.0162027	-0.0263535	-0.0233487	0
108.8	0.0123035	0.00232774	-0.00579644	-0.0217017	-0.0248878	-0.0177942	0.0226363	0.00328442	-0.0598663	0.00330901	0
109	-0.0288527	0.0264458	0.0100112	-0.0127904	-0.0281391	-0.0177924	-0.0116974	-0.0510295	-0.0103444	-0.0386766	0
109.2	-0.00504569	0.00110468	0.0039354	0.0239238	-0.0207271	0.0109609	-0.0907765	0.00584759	0.0223291	-0.035083	0
109.4	0.0287247	0.00327151	-0.0213623	0.00834928	-0.0126752	0.00868579	-0.0305143	0.00177202	-0.0136799	-0.00275424	0
109.6	-0.0151436	0.00990358	-0.00475155	-0.0168679	-0.0115699	-0.018651	0.0182052	-0.0226817	-0.00963153	0.0143266	0
109.8	-0.0416718	-0.0163687	0.0157437	0.00958544	-0.00428225	-0.0272956	-0.0315777	0.00679086	0.0332501	0.00881588	0
110	0.0363539	-0.0153518	-0.0266517	0.026028	0.0127904	-0.0108871	0.00640525	-0.0171506	0.0107432	0.0114241	0
110.2	0.0377583	-0.0250841	0.00714792	0.000778251	-0.00356715	0.0272652	0.0194323	0.0442466	0.0138715	0.0801407	0
110.4	0.0233003	-0.0644892	0.0040475	-0.0308981	0.00585241	0.00672136	0.00271836	0.00918722	-0.0122962	0.0408892	0
110.6	-0.0023262	0.00679521	-0.0223504	-0.0242833	0.0135796	-0.0664974	-0.0194212	-0.030467	0.0298892	0.0180858	0
110.8	-0.0103838	0.0409153	-0.00302169	-0.0112803	0.0179769	-0.00569665	0.0119731	-0.0226538	0.0378515	-0.0113447	0
111	0.0006525	-0.0119413	0.0117561	-0.00309106	0.0129585	0.0420254	0.0727634	-0.0268616	-0.00328744	-0.0238423	0
111.2	-0.00392752	-0.0188785	-0.0157865	0.00220688	0.00545337	-0.0297762	0.0732761	-0.0180768	-0.0249116	0.0104903	0
111.4	-0.0202114	-0.00177649	-0.011585	-0.0165697	0.0109669	0.0390946	0.0251295	0.0553517	-0.0567557	-0.0304013	0
111.6	-0.0386327	0.00697224	-0.0202162	0.0016805	-0.0424701	0.00460194	0.0174659	0.0331589	0.0352078	-0.0200916	0
111.8	-0.0379024	0.0177351	-0.0228105	0.0164913	0.0140013	0.00418234	-0.0267391	-0.0424973	0.0131959	0.00299299	0
112	-0.0198205	0.0110781	0.0029548	-0.000638063	0.00842839	0.017979	0.0136381	-0.0622296	-0.00972109	-0.00353716	0
112.2	-0.0114236	-0.00760502	-0.00720849	0.00762102	-0.0293902	0.00446374	0.0135983	-0.0309866	0.0193752	-0.0152548	0
112.4	-0.0222383	-0.00265464	-0.0234516	0.0151536	0.0117603	-0.0106341	-0.0635919	-0.00621491	0.012607	-0.0211271	0
112.6	-0.00861216	-0.00410372	0.0211055	-0.0162954	0.0424711	0.000685133	-0.0391903	0.0179065	-0.0303394	-0.0271049	0
112.8	0.0433658	-0.0571902	0.0219097	0.0128234	0.012666	0.0411382	0.00494298	0.0555342	-0.0441927	0.00325509	0
113	0.00577959	0.00145506	0.00965923	-0.0108946	-0.034013	0.028311	0.0158428	0.0278294	0.000373525	0.0492456	0
113.2	-0.00335541	0.0321757	0.0182628	-0.030705	-0.0299832	-0.0192995	-0.00685081	0.00260855	0.0179018	0.0173862	0
113.4	0.0247497	0.0145675	0.02573	-0.00586494	-0.0156293	-0.00773637	-0.0101897	-0.00104883	-0.0219537	-0.011192	0
113.6	0.0246606	0.0047484	0.0257567	0.0361649	-0.0189145	0.02529	0.0051455	0.0196866	-0.0195213	0.00117797	0
113.8	0.0185336	0.00141256	0.00162778	0.038881	-0.00509903	-0.00874994	0.00758931	0.0157143	0.0121283	0.000650373	0
114	0.0357968	-0.00376324	-0.0474198	-0.00846611	0.0264705	-0.048618	0.00232666	-0.0545438	-0.00869488	-0.0083246	0
114.2	0.00199614	0.0107409	-0.0195514	-0.0143816	0.0154139	0.000527058	0.00304767	-0.0605446	0.0594928	0.00901607	0
114.4	-0.00461561	0.0262042	0.0208863	0.0296083	-0.0212501	0.00607706	0.0458341	-0.062189	0.0191808	0.0381272	0
114.6	0.00674479	0.0123201	0.00225551	-0.00986999	-0.01732	-0.0203102	0.00546871	0.00225047	0.0194249	0.00669637	0
114.8	0.0250254	-0.0131591	0.0135272	-0.0251743	-0.00142374	0.000848007	-0.0367051	0.0273145	0.00154671	0.00129625	0
115	0.0191143	-0.00691951	0.0182536	0.00239001	0.0225532	0.0267519	-0.036688	0.00492207	-0.0507301	0.00152501	0
115.2	-0.0126643	0.00318657	-0.0319011	-0.0246975	0.0463932	-0.00354157	-0.0370001	0.0190835	-0.0250679	-0.0441123	0
115.4	-0.00472701	-0.0232405	0.000920532	-0.011231	0.00549761	-0.0200314	0.0107482	0.0035486	-0.0171444	-0.0278262	0
115.6	-0.00461057	0.0291899	-0.00635044	0.0305251	0.0108693	-0.00882574	-0.00372905	0.0315807	-0.0445528	-0.0629804	0
115.8	-0.00571199	0.0340707	-0.0202395	-0.00698355	0.0171844	-0.0150934	0.0100072	0.0299434	0.0471535	-0.0110767	0
116	-0.00975029	-0.000988016	0.0184457	-0.0221889	-0.0246398	-0.0228691	0.0163996	0.0278591	0.0201403	0.0197763	0
116.2	-0.00125879	-0.0256575	0.0239533	-0.00760229	-0.0290798	0.00971001	-0.023919	0.00692488	-0.0559866	0.0197609	0
116.4	0.00535078	-0.0174886	-0.00297451	-0.00968092	0.00996501	0.0163835	-0.0355193	0.000140592	-0.0351249	0.0492734	0
116.6	-0.00731549	0.0165658	0.0152288	0.0141406	-0.00306578	-0.0114723	0.0165483	0.0387255	-0.0307202	0.0346384	0
116.8	0.00694978	0.0228608	-0.0167063	0.0475371	-0.0115857	0.0708874	0.0261287	-0.0131732	0.000535441	-0.02933	0
117	-0.00316811	0.0253846	-0.00278858	0.0272121	0.0111086	0.0183292	0.00968431	0.0127134	0.0715575	0.00510091	0
117.2	0.0148396	-0.0208228	0.0503144	-0.00948904	-0.00565033	0.0286117	-0.0205197	-0.0214845	0.0664137	0.00715062	0
117.4	0.0159766	0.00324462	0.00401185	-0.0318293	-0.016362	0.0108777	-0.0305229	-0.0257083	0.0384158	0.00113824	0
117.6	-0.00720182	0.010215	-0.045387	-0.00985383	0.0125329	-0.0254159	0.0335441	-0.0111169	-0.00640391	0.0107771	0
117.8	0.00124211	-0.0512024	0.00275419	0.0106691	0.0115648	0.013889	0.077069	-0.0477742	-0.0402421	-0.000327272	0
118	0.00993421	-0.012068	-0.00549744	-0.0307716	-0.0233125	-0.00226941	-0.0153243	-0.0202399	0.0159844	0.013217	0
118.2	-0.039746	-0.047444	-0.0361471	-0.00889947	0.0267603	-0.0211155	-0.0323496	0.00400457	-0.0249477	0.0378925	0
118.4	-0.0367916	-0.0359556	0.0191675	-0.0126793	0.0119975	-0.0050947	-0.0109863	-0.0121225	-0.0119112	-0.036148	0
118.6	-0.00980365	0.0250046	0.0205104	-0.0256273	-0.02121	-0.0356471	0.0144907	0.000313738	-0.0222846	0.0119803	0
118.8	-0.00474205	0.0487258	-0.017988	-0.000578254	-0.0289116	-0.026705	-0.0116448	0.000584868	-0.0152184	0.0359586	0
119	0.00656801	0.0282297	-0.0133891	0.0248544	-0.0186066	0.0137385	-0.0291085	0.0156384	0.0212065	-0.0466157	0
119.2	0.0184353	-0.00129591	-0.00266766	0.0233225	0.00529669	-0.0159482	0.0148091	0.05602	0.00810882	-0.029991	0
119.4	-0.0094265	-0.0271971	-0.00860635	0.0402593	0.0167928	-0.0225177	-0.00492549	-0.0181837	0.00936262	0.0211771	0
119.6	0.0333192	0.0269162	0.0191377	0.0246854	0.0156054	-0.0125885	-0.0134819	-0.0177756	0.0120864	-0.0517318	0
119.8	0.0243582	0.00365874	0.0215031	0.00329961	0.0144031	0.00882072	0.00233332	0.0123915	-0.00328965	-0.0193841	0
120	0.00611818	-0.0107081	0.00762979	-0.00703519	0.0240858	0.00319954	-0.0101832	-0.0174859	-0.026251	-0.00510055	0
120.2	0.0299639	-0.0106914	0.0225511	0.0150898	0.0430408	0.0377166	0.000524092	-0.0319341	-0.026619	0.0026682	0
120.4	0.0466473	-0.00621319	0.0443565	0.0554809	0.0457403	0.0624576	0.0345592	-0.00689929	7.28255e-05	0.0287274	0
120.6	0.0389512	0.0570881	0.036631	0.0568932	0.0172867	-0.0136025	-0.0125265	-0.0204735	0.0141349	-0.0196164	0
120.8	0.0594381	0.0404776	0.0460091	0.0254012	-0.00712477	0.024384	-0.0612642	0.00584911	0.000417337	0.0504778	0
121	0.0723577	0.021556	0.0612154	0.0276416	-0.0145579	0.0548208	0.0349489	0.053587	0.0420433	0.0912199	0
121.2	0.0461159	0.0495218	0.0488173	0.0750184	-0.00064101	0.0120355	0.0373032	0.0402221	0.0980361	0.0469799	0
121.4	0.0396929	0.0723137	0.0669483	0.0712644	0.0360622	-0.0114323	0.00280803	0.0377953	0.0728818	0.00107721	0
121.6	0.0649091	0.0906858	0.0876508	0.0358357	0.0225935	0.00807067	0.0271799	0.0502292	0.0524344	-0.00377495	0
121.8	0.0796797	0.0903219	0.0649214	0.028621	-0.0220383	0.0223573	0.0349302	0.024473	0.061639	0.0184697	0
122	0.0822131	0.035404	0.0587798	0.0176828	0.00818598	0.0361199	0.00135691	0.0168164	-0.0244948	0.0466985	0
122.2	0.063406	0.0794542	0.0428052	0.0679669	-0.0198331	0.031299	-0.039001	0.0157907	-0.0121553	0.0198034	0
122.4	0.0453486	0.0555773	0.0861753	0.0691099	0.0249081	0.0442936	0.0193962	-0.00233457	0.00194927	0.0346939	0
122.6	0.06481	0.0365784	0.0870154	0.0513986	0.0400285	0.0217567	0.0324794	0.0352484	0.0392722	0.0517404	0
122.8	0.0964035	0.0660342	0.0918844	0.0806302	0.0171611	0.0229712	0.0392007	0.0179727	0.0658485	0.050252	0
123	0.0948257	0.0932621	0.115884	0.0999898	0.0367258	0.0583898	0.0437334	-0.027393	0.0500656	0.0160169	1
123.2	0.109494	0.113662	0.109554	0.0669522	0.0612562	0.0701779	-0.00691424	0.0447853	0.0654757	-0.00927753	1
123.4	0.195221	0.129205	0.17446	0.091443	0.0534741	0.109418	0.0646513	0.0799097	0.121424	0.0703475	1
123.6	0.168009	0.096955	0.188988	0.151948	0.116486	0.0912949	0.132729	0.0451591	0.101411	0.0250177	1
123.8	0.123328	0.104363	0.15739	0.111949	0.0843368	0.0840115	0.0857533	0.0591144	0.0341804	-0.00841807	1
124	0.124189	0.126599	0.120802	0.0952732	0.0248063	0.0758569	0.0464811	0.0655358	0.00140701	0.00685832	1
124.2	0.135238	0.113806	0.108142	0.0966864	0.0465052	0.0627429	0.0803713	0.0458013	0.0441308	0.0138571	1
124.4	0.108374	0.0885402	0.0718077	0.0596998	0.0539234	0.0478905	0.0802472	0.0392282	0.0856154	0.00175837	1
124.6	0.0549113	0.0673896	0.0144286	0.0468713	-0.00214093	0.0218347	0.0199992	0.0160635	0.0504423	0.00291957	1
124.8	0.0472374	0.016512	0.0870448	-0.0070789	0.0513939	0.0343047	0.0385184	-0.0165282	0.0337852	0.0336069	1
125	0.052712	-0.00377564	0.0439646	0.037943	0.020458	-0.0168807	0.0118111	-0.0128595	-0.00957074	0.00469386	1
125.2	0.0115486	0.00576843	0.00359681	0.0372545	0.00674657	-0.0185856	0.0503359	-0.0223197	-0.0345055	-0.0137093	1
125.4	-0.00852683	0.00989781	0.010446	0.0244301	0.0403677	-0.0361045	0.0444853	-0.0243817	0.0228978	-0.0274743	1
125.6	-0.00173445	0.00588141	0.00862912	0.0228676	0.0304286	-0.0702603	-0.0252484	-0.00814104	0.0277813	-0.0592041	1
125.8	-0.0168369	0.0025771	0.003513	0.00461899	-0.0168616	-0.0384617	-0.0174604	-0.0176856	-0.0331375	-0.0733303	1
126	-0.0221654	-0.0193641	0.00595745	0.0361369	-0.0176235	-0.0389834	-0.0043865	-0.0434109	0.0317992	-0.0665003	0
126.2	-0.0489319	-0.0462888	0.00259602	-0.0138779	-0.0148364	-0.0685362	-0.0763057	-0.0290455	-0.0338609	-0.0574671	0
126.4	-0.0157393	0.001763	0.00760965	-0.0164618	-0.0540316	-0.0152749	-0.0976796	0.00891941	-0.0270104	-0.0201357	0
126.6	0.026381	-0.00433516	0.0165206	-0.00834917	-0.0538594	-0.00716694	-0.0512632	0.0285282	0.0382882	-0.0499951	0
126.8	0.00373881	-0.0299654	0.0174544	-0.0230858	-0.00424845	-0.00644101	0.00854433	-0.0378548	0.0462192	-0.0681063	0
127	-0.034098	0.00781883	0.0129214	-0.0358168	-0.00645941	0.0116806	-0.002044	-0.079505	0.0189446	-0.0519686	0
127.2	-0.00347128	0.0219854	0.0143018	-0.0382448	-0.0464458	-0.0214934	-0.0517547	0.00119629	0.0410621	-0.0908335	0
127.4	0.044398	-0.021565	0.0234146	-0.0196375	0.00601945	0.00635188	0.0107623	-0.0018606	0.0680891	-0.0739816	0
127.6	0.0162311	-0.00238104	0.0246265	-0.0122728	-0.0178138	-0.019408	-0.0355982	0.00456565	-0.0236176	-0.0479526	0
127.8	-0.0283956	0.0348383	-0.0163937	-0.00841865	0.0290673	-0.00569041	-0.0205856	-0.00410446	-0.00103173	-0.0241954	0
128	-0.0258749	0.026078	-0.0152678	-0.0232352	0.0196606	-0.0229378	0.0191862	-0.0386861	0.0404039	-0.03052	0
128.2	-0.0156215	-0.0395205	0.00132113	-0.0247636	-0.0279321	-0.0758331	-0.000761737	-0.0512881	-0.0202046	-0.0450542	0
128.4	-0.0243159	-0.0616518	-0.0152079	-0.0194423	-0.0135099	-0.0424313	-0.040421	-0.021977	-0.0534659	-0.0137096	0
128.6	-0.0247035	0.0110849	-0.00198262	-0.0454084	-0.0422856	0.0337765	-0.0355924	0.0101265	0.00680412	0.0249746	0
128.8	-0.0505048	-0.0135369	-0.00909815	0.000892176	-0.0476542	-0.0116517	0.0469673	0.00682876	0.000426592	-0.0188177	0
129	-0.00900578	0.00582676	-0.0222519	0.01962	-0.0599101	-0.0138195	-0.00615786	-0.0422501	0.032552	-0.025454	0
129.2	0.00159012	0.0311578	-0.0271894	0.0242926	-0.0341105	-0.00865084	-0.0442148	-0.0437174	0.0188946	0.014563	0
129.4	-0.000937	0.0221402	-0.014368	-0.0114064	-0.0226553	0.00810482	-0.0257793	0.0153993	-0.00653002	-0.0171688	0
129.6	0.0242698	0.00437218	-0.00157952	-0.0272742	-0.00942667	0.0270618	0.0143203	0.0122681	-0.00791181	-0.0592407	0
129.8	0.0310204	-0.00248024	-0.013526	0.0111603	0.0293829	-0.00676319	0.0699938	-0.0528161	-0.0133221	-0.0199256	0
130	0.0092686	0.00324838	-0.0281778	-0.0215541	-0.0052522	-0.0343572	0.0497381	-0.0179578	0.0121707	-0.0171382	0
130.2	-0.025291	0.000635369	-0.0136871	0.0079428	0.0202086	-0.00159721	-0.0266256	-0.00162321	-0.00618496	0.0255528	0
130.4	0.0201186	-0.0094021	-0.00659424	-0.00507085	0.00393191	0.0336035	-0.0281257	0.029143	0.0180677	0.0312725	0
130.6	0.0486803	0.0106444	0.0389954	-0.0281846	-0.0175679	0.0104091	0.01653	0.0361841	0.035506	0.00957761	0
130.8	-0.000761134	0.0190604	0.0327493	-0.0422504	0.0274377	-0.007723	0.0504039	0.0291581	0.0138687	-0.0176976	0
131	-0.0380765	-0.0117998	0.00597198	-0.0193755	0.0518417	0.0265688	0.0250108	0.0164888	-0.000153535	-0.0323029	0
131.2	-0.0109819	-0.0243095	0.0660245	0.0339586	-0.00334447	0.0243643	-0.0322729	-0.0329407	0.00112346	0.00397291	0
131.4	-0.0136174	-0.0129092	0.00649321	-0.0288221	0.0061625	-0.0447157	0.013355	-0.0400686	-0.0194724	0.0431346	0
131.6	-0.0388515	-0.0197765	-0.0220841	0.00977473	-0.0100345	-0.000474542	-0.0105421	0.0238859	-0.0361087	-0.0216318	0
131.8	-0.0255005	0.0195651	-0.0115751	0.0123909	-0.0235828	-0.00537215	-0.00810777	0.00495998	-0.0440542	-0.0135509	0
132	-0.0152565	0.0160404	-0.0278095	0.0284809	0.0049421	-0.0330661	-0.00105243	0.00864052	-0.00120604	0.0274981	0
132.2	-0.00540593	-0.0248551	-0.0386816	0.0596679	0.0240255	0.00389342	0.0222577	0.0492998	0.0281757	0.000537063	0
132.4	0.025208	-0.00588689	-0.00656673	0.0385717	-0.00014775	0.0335633	0.0317823	0.0220272	-0.0112329	-0.0394634	0
132.6	0.0127636	0.0162381	0.0108958	0.0302565	-0.0165697	0.00170701	-0.0728408	-0.0183191	-0.01573	-0.0178257	0
132.8	-0.0204274	-0.0133071	-0.00196331	-0.0180696	-0.0191201	0.00824669	-0.0417858	-0.0391652	0.0331687	0.0197728	0
133	0.0225295	0.0262339	-0.0330917	-0.0149311	-0.00960551	0.0172104	0.0338307	0.0049953	0.0393337	-0.00358448	0
133.2	0.0386324	0.0112827	-0.0222733	-0.00668292	0.0313125	0.00862595	0.0256149	-0.028098	0.027963	0.0228661	0
133.4	-0.010103	-0.0235562	-0.0150679	-0.0153216	0.0522843	-0.0170154	-0.00603827	-0.0197244	0.0222454	0.0287559	0
133.6	-0.0131491	0.0241921	0.00646395	-0.0366621	0.0260151	-0.0252919	0.00732281	0.0365604	0.0353503	-0.000579274	0
133.8	0.030774	0.0524835	0.0639541	-0.0485448	-0.0253423	-0.0104328	0.0019965	0.00610214	0.0291653	0.0308601	0
134	-0.0141099	-0.04214	0.0301184	-0.00339392	-0.0764232	-0.0194617	-0.055592	0.0154818	-0.0598718	0.0194804	0
134.2	-0.00925895	-0.0624434	0.0179027	-0.0149544	-0.0161835	0.0173551	-0.046736	-0.03584	-0.0420003	-0.0349557	0
134.4	-0.00612216	0.00959291	-0.00151738	-0.011507	-0.0134399	0.0162159	-0.0175941	-0.0232095	-0.000944275	0.016628	0
134.6	0.0142815	0.0313591	-0.0104996	0.00580571	-0.0155426	-0.00134255	-0.00419043	0.0348005	-0.0133196	0.0413826	0
134.8	0.0278429	-0.00429426	-0.000826299	0.0263797	-0.0140435	0.00853562	0.0220601	0.0418983	-0.0373397	0.0188382	0
135	0.0111592	-0.000963178	-2.42749e-05	0.0149013	-0.0251125	0.0115733	0.0459496	0.00620926	-0.0341546	0.00707364	0
135.2	0.00736297	0.0298483	-0.0133497	-0.0323616	0.0236772	-0.00756266	0.0378483	0.00832467	-0.00897098	-0.0497923	0
135.4	-0.0133211	0.00274903	-0.0234165	0.0173051	0.0482419	0.00361731	0.054971	0.042392	0.0374356	-0.0768477	0
135.6	-0.0151673	-0.0373261	0.00595865	0.00527851	0.0056166	-0.0298737	0.0162218	-0.00553386	0.00349262	-0.0043847	0
135.8	-0.0238179	-0.032367	0.0104635	0.00999443	0.0229652	-0.0423208	-0.0234802	-0.0508421	0.00297154	0.0106526	0
136	-0.0191589	-0.00966743	0.0252262	-0.00123724	0.0132503	-0.0182473	-0.00655177	-0.0339933	-0.0129124	-0.013133	0
136.2	-0.00576165	0.00100272	0.0197616	-0.0265678	0.000708378	-0.00834533	-0.00161176	-0.00820488	0.00459561	-0.0155555	0
136.4	-0.0182743	-0.00708079	-0.0300883	0.00263769	0.0416261	0.00276723	-0.0322728	-0.0120494	0.0707955	-0.000207889	0
136.6	-0.0295958	-0.0259664	-0.0169771	0.0143626	0.00794857	0.0407535	-0.0216001	-0.00657274	-0.00214845	0.0284567	0
136.8	-0.00247367	0.0137857	-0.010747	-0.0264131	0.0432015	-0.00407213	-0.0473536	0.0147475	-0.0182417	-0.0179926	0
137	0.0363724	0.0367477	-0.0132092	0.011769	0.0161637	-0.0109247	0.00156883	0.0342048	-0.00562791	-0.00368505	0
137.2	0.00510112	0.031143	-0.00720374	0.0364034	-0.0591583	0.0258849	0.00341446	0.0210972	0.018343	0.0120437	0
137.4	-0.0172764	0.0156587	0.00264142	0.0201312	-0.0431099	0.0302973	0.0165381	0.00582885	0.0134027	0.0219857	0
137.6	0.013932	0.00883421	0.00619813	0.00125253	0.00967666	0.0142142	0.0535098	0.00867395	-0.00624754	0.040907	0
137.8	0.0195119	0.00890948	0.0042076	-0.0136969	-0.0208399	0.00675464	0.00944639	-0.00394174	0.00319269	0.0264001	0
138	0.0151725	-0.0142533	-0.00091988	0.00551599	-0.0231139	-0.026851	0.0128363	-0.0212687	-0.0060579	0.00725194	0
138.2	0.0141925	-0.0193389	-0.0113916	-0.00721655	-0.0302055	0.0279273	0.00400796	0.0115329	0.0237718	-0.0173128	0
138.4	0.00307699	-0.0116316	-0.0207	0.0202293	0.0276725	-0.00342119	-0.000601643	-0.0226343	0.0355132	0.00350683	0
138.6	0.0143865	-0.00458041	-0.0173675	0.0161676	0.0420519	-0.0179934	-0.0356065	-0.037709	-0.00998938	0.00267925	0
138.8	0.000944187	-0.00327775	-0.0138986	-0.00960468	0.00432006	0.00131672	-0.0280563	-0.0199984	-0.0312835	-0.00913597	0
139	-0.0230692	-0.00254215	0.00317991	-0.00506154	0.00658687	-0.00333702	0.0156494	-0.0155745	0.0171434	-0.00323503	0
139.2	0.0143487	0.00315305	0.0316302	-0.00801346	0.0129419	0.0261637	-0.0126758	0.0202158	0.031033	-0.0146241	0
139.4	-0.0161908	0.00309013	-0.0154912	0.027676	-0.00909537	0.000642802	0.0393568	0.0201129	-0.0395685	0.0139557	0
139.6	0.0182247	0.00272642	-0.000128096	0.0384418	0.0290254	0.0116143	0.0393478	-0.0102814	-0.0432601	-0.0378902	0
139.8	0.00312848	-0.00772237	0.0360436	0.00760109	-0.0177491	-0.0117964	0.0387727	0.0204396	-0.0367982	-0.00457076	0
140	-0.00546018	-0.00172259	0.0283375	-0.00960029	-0.0321609	-0.0483911	-0.0219246	0.0238054	-0.00424364	0.042117	0
140.2	0.0237886	-0.00415568	0.0217824	-0.00418843	0.0108832	-0.000802257	-0.0810344	-0.0160153	-0.0077253	-0.0190705	0
140.4	0.00666639	-0.0197194	0.0242042	-0.0282892	-0.015595	0.0602954	-0.0298699	-0.00953007	-0.0460759	-0.0608827	0
140.6	-0.0129969	0.0190623	-0.0166935	-0.056775	-0.0126601	-0.00540823	-0.00443182	0.00145836	0.045443	0.0250539	0
140.8	-0.0209708	0.014788	0.023715	0.00860583	0.0187938	-0.0306438	0.0153687	0.011666	0.00495824	0.0636194	0
141	-0.00411722	-8.78393e-06	0.0128427	-0.0111876	-0.0151535	-0.00585148	-0.0117152	0.0185012	0.00738412	0.0164032	0
141.2	0.00176351	-0.00304704	-0.0252301	-0.00373272	-0.0364316	0.0243993	-0.0286406	-0.0343331	0.0255874	-0.033771	0
141.4	-0.00569389	-0.000506773	-0.0130047	0.0117774	-0.00806339	-0.00303592	0.00224372	-0.0401219	0.0106769	-0.046455	0
141.6	-0.0099408	-0.00673213	-0.00391436	-0.0198372	0.0193223	-0.0291323	-0.00505768	0.00109993	-0.0016743	-0.0259118	0
141.8	-0.00898553	-0.0228133	-0.0359753	-0.00482745	0.015289	0.0126719	-0.0575634	-0.0175071	0.00372191	0.00408898	0
142	-0.000206834	-0.0203855	-0.00624754	0.0149334	-0.0155336	-0.000775283	0.00938413	0.0167277	0.0242031	-0.0129586	0
142.2	-0.0213998	-0.00443354	-0.00607207	0.0128805	-0.0144789	0.0286926	0.0460337	-0.0423038	0.00326617	-0.0344194	0
142.4	0.0146166	-0.0169272	-0.00265518	0.0265945	0.034489	-0.00477014	0.0259059	-0.0270801	-0.0354906	0.0462508	0
142.6	0.0217027	0.0284043	-0.00749556	0.0191073	0.0437174	-0.0161439	-0.00036121	0.0372739	-0.0130019	0.0444914	0
142.8	0.00561417	0.0367773	0.0139076	0.00360753	-0.000692962	0.0233618	0.0093539	0.0310057	-0.0117739	-0.0113337	0
143	0.00959951	-0.0111704	0.0445409	0.00792274	-0.014479	3.99231e-05	0.0262357	-3.5235e-05	-0.0281222	0.0249132	0
143.2	-0.0250673	0.0553444	-0.00691658	-0.0051665	0.0206704	-0.0509834	0.00647974	0.0271711	0.0584892	0.0210224	0
143.4	0.00625255	0.00773615	-0.00976857	-0.00595249	0.030439	0.00201374	0.0264764	0.019843	0.0163234	-0.039865	0
143.6	-0.00103725	-0.0529451	0.0197771	-0.0169148	0.0230138	-0.0226021	0.0697822	-0.0275189	-0.00886833	0.0162211	0
143.8	-0.00657443	-0.0056395	0.028516	-9.68693e-05	-0.0376958	-0.0165826	-0.00619441	0.00772512	-0.00728536	0.0402239	0
144	-0.00714477	0.00278111	-0.00603343	0.011118	-0.0396175	0.0357785	-0.0697726	0.00946364	0.0202167	-0.0131978	0
144.2	-0.0102241	-0.0278101	-0.0329991	-0.0136267	-0.0050702	0.0329486	-0.0381546	-0.0485469	0.0419797	-0.0202015	0
144.4	0.00821847	0.00456432	-0.0357122	-0.0302829	-0.0168894	-0.00815067	-0.02677	-0.0231106	-0.011293	0.000816874	0
144.6	0.00999591	-0.0322418	-0.0552368	-0.0241985	0.0372038	-0.00660923	-0.0255866	0.0120557	-0.0695365	-0.0392211	0
144.8	-0.0205466	-0.0174694	0.0252904	-0.0279668	0.00668193	-0.00947289	-0.00272831	-0.0249485	-0.00633397	0.0697395	0
145	-0.0352235	0.0189607	0.0172021	0.0431995	0.023753	-0.018763	0.00221968	0.049947	0.000952186	0.04342	0
145.2	-0.0298311	0.0144931	-0.0110167	0.0346338	0.00554324	-0.00188808	-0.0126125	0.08695	-0.00402714	-0.0455271	0
145.4	-0.000296457	0.0139591	-0.00652958	-0.0118469	-0.049369	0.00813404	0.0157104	0.00584671	-0.00732462	-0.0282296	0
145.6	0.0301007	0.0135175	0.00364525	0.0250893	-0.00934648	-0.00545256	0.0493371	-0.0521761	-0.0136592	0.0147149	0
145.8	0.0185557	-0.0178533	0.0169616	0.0356693	0.065796	-0.00446235	-0.00496938	-0.0329014	0.0213667	-0.0189479	0
146	-0.00452823	0.0307125	-0.0198512	-0.0347977	-0.00730712	-0.0113269	-0.0424569	-0.0226316	-0.00130903	-0.0231073	0
146.2	-0.0270762	0.0139142	0.0103884	-0.0325231	-0.0506596	-0.0216052	0.00977245	0.00669993	-0.0141721	-0.0169268	0
146.4	0.0029483	-0.0157988	0.012566	0.0219119	-0.0442771	0.0154424	0.00863927	-0.0378165	-0.0239002	-0.0106531	0
146.6	0.027086	-0.0197391	-0.0186947	-0.0164836	-0.0579531	0.0162976	-0.039971	-0.0269864	-0.0417242	0.015682	0
146.8	0.010733	-0.0157015	-0.018074	-0.0446773	-0.0446093	-0.0222321	-0.0481773	0.0287224	-0.0235893	-0.00835277	0
147	-0.00730644	-0.00717839	0.00916353	0.0253877	0.0239488	-0.0289581	-0.0160462	0.00326304	0.0475857	-0.0569804	0
147.2	-0.0105772	0.0134781	0.0129135	0.0108005	0.048357	-0.0273548	0.00590721	-0.0166874	0.0748771	-0.00120038	0
147.4	0.00497778	0.0271986	-0.0167013	-0.0162575	0.0561697	-0.00360619	0.00830682	-0.00252456	-0.0211449	-0.0193384	0
147.6	-0.0105643	-0.0387038	-0.0270133	-0.0201157	0.0492368	0.0179371	0.0255564	0.0265578	-0.0238789	-0.00876972	0
147.8	0.000634454	-0.0330927	0.0042238	0.0164907	-0.0058707	0.0053925	0.00169652	0.00193297	0.0125901	0.0462138	0
148	0.0262553	-0.0245626	0.00274513	0.041942	-0.00415701	0.00601499	0.0162578	0.0275597	-0.00522052	0.0587394	0
148.2	0.0158131	-0.0390423	-0.023301	0.0147101	0.0453446	0.0196227	0.059081	0.0705406	0.00194349	0.0168066	0
148.4	-0.0259862	0.00587382	2.30399e-05	-0.0162104	0.0242598	0.00804854	0.0220008	-0.00781374	0.0668062	1.48824e-05	0
148.6	-0.0426786	-0.0123201	0.0237609	0.000707698	0.00380643	0.0200343	0.0056975	-0.0553517	0.0338098	0.0228695	0
148.8	0.0608716	0.0211495	0.037835	0.00117701	-0.0142384	0.0180902	0.0301843	-0.0138964	-0.0441249	0.00231285	0
149	0.0197941	0.00476173	0.0144312	-0.0431148	-0.0233429	0.0155653	0.00692035	0.0584926	-0.026036	2.38143e-05	0
149.2	-0.0462222	0.00283582	0.00226077	-0.0283892	-0.0381925	-0.00220403	-0.0512266	0.0255969	0.0319687	-0.00371962	0
149.4	-0.00123178	0.0274274	-0.00526441	0.00429076	-0.0288451	-0.0172877	-0.0267572	-0.0226273	0.0186184	0.00134849	0
149.6	0.0201741	0.0161485	-0.0206576	-0.00075904	-0.0209202	-0.0133463	0.0421418	0.00886018	-0.0294507	0.00945869	0
149.8	-0.0345102	0.0119239	-0.0164014	0.0171181	-0.0554034	-0.0119008	0.0125498	0.000742103	-0.0322081	-0.0373004	0
150	0.0187657	0.0330554	-0.0299691	-0.000952142	-0.00581386	-0.00103505	-0.0121626	-0.0375648	-0.0376635	-0.0614804	0
150.2	0.0204283	-0.00889725	0.0283947	0.00712829	0.0259142	-0.0142321	-0.013854	-0.00414103	0.0262682	-0.0380804	0
150.4	-0.00594458	0.011234	0.0287646	0.0173719	0.000410603	-0.00420681	-0.0090323	-0.039966	-0.0156712	-0.0294489	0
150.6	0.00240135	-0.00102006	0.00114363	0.0295495	-0.0279375	0.00276932	-0.0224859	-0.0318892	-0.00310028	0.00692778	0
150.8	0.00118012	-0.0101019	0.00246381	0.00697348	-0.00953165	-0.001024	-0.0284819	0.00409421	0.0276135	0.0350834	0
151	-0.0242252	0.0519227	0.005742	-0.0329212	0.025169	0.0191267	-0.0164498	-0.0326416	-0.051671	0.0105052	0
151.2	0.00104154	-0.00903027	0.0219971	0.010255	0.0278805	0.0259796	-0.0271528	0.0178336	-0.00631393	0.0267915	0
151.4	0.0237192	-0.0374552	0.00941721	0.00200167	0.0389789	-0.00778472	-0.00434676	0.0437216	-0.00346544	0.00942444	0
151.6	0.015186	-0.0247288	-0.0167108	-0.0218326	-0.0225283	0.0100195	0.00983301	0.0118866	-0.0198463	0.0077789	0
151.8	-0.00904406	-0.00625685	0.023808	-0.00629393	0.00281316	-0.0209097	-0.0163809	-0.015246	0.012516	0.0130868	0
152	-0.0155995	0.0122766	-0.00571964	-0.0121109	0.0322172	-0.0330793	-0.0127048	-0.0146399	0.0159821	-0.0317428	0
152.2	-0.0180525	0.0120393	-0.0610674	-0.0109405	-0.0177922	-0.0012846	0.0119722	-0.0114711	-0.00187155	-0.0463627	0
152.4	-0.0174827	-0.0223868	0.00712919	0.06371	-0.00891988	-0.0096707	-0.01276	-0.00837014	0.0540666	0.0506642	0
152.6	0.0306845	-0.0323282	-0.0329786	0.0597036	0.0283276	0.0408077	0.00554362	0.00823776	0.0697054	0.0785682	0
152.8	0.00215594	0.0188592	-0.0120043	-0.0200701	0.025236	-0.00487434	0.0874808	-0.00226923	-0.00548377	-0.0175478	0
153	0.033404	-0.000347	0.00621094	-0.0148906	-0.0181092	0.0106158	0.0827017	-0.0234276	-0.0187512	0.00680637	0
153.2	0.0382454	-0.00879281	0.0128682	0.0123668	-0.0172505	0.0164756	0.00824768	-0.00331409	-0.0292053	0.00481819	0
153.4	0.0124805	0.0318552	0.0119712	0.00709269	0.0235193	0.00622183	-0.0325851	0.0571888	-0.0161063	-0.0234694	0
153.6	0.0236331	0.0485139	0.000663687	-0.0148245	0.0239071	0.0261422	-0.0244701	0.0520978	0.0389367	0.00365761	0
153.8	0.000466029	0.025099	0.00966833	-0.0471211	-0.0119953	5.79196e-05	-0.0210377	-0.0345358	0.00599205	-0.0327479	0
154	-0.00588368	-0.0240706	0.0101323	0.00848286	-0.0164538	0.0134993	-0.0226263	0.00664897	-0.0224493	0.0142718	0
154.2	0.00593605	0.0478633	0.0632643	0.0374505	-0.0306433	-0.0216119	0.0363519	-0.00351544	-0.0622821	0.0168153	0
154.4	-0.0100065	0.0223885	0.0180982	-0.00112073	-0.0263644	-0.022854	-0.0135982	-0.0149955	-0.0547604	-0.0230371	0
154.6	-0.0346348	-0.0412018	-0.0327723	-0.0177578	0.00711093	-0.0206951	-0.0239375	-0.00734247	-0.0167366	-0.0345959	0
154.8	-0.0258214	-0.00378391	0.0133639	0.0145799	0.0128155	-0.0370833	0.00437372	-0.0129322	0.010912	-0.00901996	0
155	-0.00518055	0.0374354	0.0490397	0.0206175	-0.00254109	-0.0191615	-0.0386996	-0.0101807	0.0239534	0.00948176	0
155.2	-0.00752376	0.00173157	0.0216656	-0.0143039	0.0236962	0.00425738	0.0467897	0.0011897	0.00845167	0.000852854	0
155.4	0.0176857	-0.0325046	-0.00305285	-0.0190813	-0.026663	0.0383917	0.0378571	-0.0138818	0.00783661	-0.0047045	0
155.6	0.0115285	-0.0119636	-0.0121852	-0.00209499	-0.0254576	0.0065982	0.0186667	-0.00220714	0.0801922	-0.0141469	0
155.8	-0.0138744	-0.0024063	0.0066535	-0.0114235	0.00730432	0.00514037	-0.0148537	0.040718	0.0447714	0.00616588	0
156	-0.0137878	0.00201094	0.00752893	0.00133783	0.0258359	0.0443408	-0.00765644	0.0316218	-0.0300249	0.0428714	0
156.2	0.00646086	0.00944793	-0.0123056	0.0324527	0.0341057	0.0347323	0.00749349	0.0103222	0.000825361	0.0514675	0
156.4	0.00741543	-0.00950217	-0.00339355	0.00797351	0.00953671	-0.00401985	-0.046993	0.0326727	0.0295482	0.0206467	0
156.6	-0.0153376	0.00200885	-0.00787741	-0.0156844	-0.0323793	0.00962446	0.0111533	-0.0490722	0.00148306	-0.0190152	0
156.8	-0.0148544	-0.0187836	-0.00701105	-0.0543426	0.0299186	0.00534834	0.0267227	-0.0278389	0.0334416	0.0177092	0
157	-0.000341678	-0.00238772	-0.0467447	-0.0110734	0.028893	-0.00503439	0.0411254	0.0343091	-0.00244804	-0.0351075	0
157.2	-0.00966417	-0.0351305	-0.0182307	0.0314093	0.0110169	-0.0143608	0.00409172	0.0296751	-0.0305939	-0.0265421	0
157.4	-0.00366913	-0.0421321	0.0191563	0.0390156	-0.00376359	-0.0186745	-0.06656	0.0256524	-0.0106257	0.0358559	0
157.6	0.0136081	0.0242712	-0.0188969	0.0428163	-0.0323489	-0.0177646	-0.0468163	0.0380512	0.00268215	0.00660933	0
157.8	-0.0149561	-0.00557051	-0.0047019	0.00832487	-0.0109406	-0.0229376	0.0307371	-0.0273005	0.00776345	-0.0141558	0
158	0.0254918	0.0266671	-0.000496974	0.0112014	-0.0710965	-0.0146687	0.0177281	-0.0273641	-0.07531	-0.0356779	0
158.2	0.00237883	0.00462462	0.0396865	-0.025859	0.0144782	-0.0349853	0.0036987	-0.0152556	-0.0217305	0.0139549	0
158.4	-0.00905944	-0.0197436	-0.0166296	-0.0296162	0.0161526	-0.0288082	-0.0251101	-0.0322224	-0.0121632	0.0361689	0
158.6	0.00146102	-0.00869444	-0.0634708	-0.0239807	-0.0226076	0.000457301	-0.00108234	-0.0554588	0.00638602	0.0102535	0
158.8	-0.000246717	0.0194186	-0.00261697	-0.0426005	0.00409983	0.0173905	0.0273228	-0.0304315	0.0367045	0.00431328	0
159	0.0113239	0.0597487	0.0388934	-0.031161	0.000404015	0.0296966	-0.0256975	0.0295464	-0.0331438	-0.012382	0
159.2	0.0201011	0.0589654	0.02303	0.0120799	0.0159317	0.0283085	-0.0119018	0.0334301	-0.00936891	-0.0768235	0
159.4	0.0155998	-0.0344873	0.0237367	0.0673878	0.0373388	-0.00790667	-0.00287201	0.0241134	-0.00303601	0.0111425	0
159.6	0.000800191	-0.0089135	-0.0124002	0.0313719	0.0452436	0.0192634	0.0561257	0.0249427	0.0112021	0.0547339	0
159.8	-0.0111533	-0.00689917	-0.0389161	-0.0258597	-0.00572794	0.0119983	-0.000798309	0.00735403	0.0137775	-0.00192131	0
160	-0.00642052	-0.00512217	-0.0117933	0.00827276	-0.0278667	0.00273135	-0.0373698	-0.0132983	-0.00628103	-0.0159617	0
160.2	0.00524589	0.0334508	0.0344153	0.0446078	-0.00812585	0.0186185	0.0358231	-0.00560336	-0.0187247	0.0187979	0
160.4	-0.00562808	-0.0319171	0.0350602	-0.013227	-0.0247566	-0.0301005	-0.000270425	0.000463363	-0.0131636	-0.00844576	0
160.6	-0.0329928	-0.0198413	-0.0310035	0.0107535	0.0321823	-0.018098	-0.012162	-0.0212716	0.00232337	-0.0102271	0
160.8	-0.017655	0.0238033	-0.021681	-0.00019359	-0.0257712	-0.0114788	0.0105136	-0.000112364	0.0120637	0.0105048	0
161	0.00804027	-0.00506381	0.0151975	-0.0189849	-0.0350718	0.0148056	0.0147997	-0.0196105	-0.00678796	0.00919136	0
161.2	0.0246542	-0.044328	0.0240389	-0.0330855	0.0307363	0.0183485	0.000100943	0.000289721	0.0127256	-0.0052058	0
161.4	0.0136902	0.00760504	0.016117	-0.0112642	0.0356902	-0.0102895	0.0158896	0.0242964	0.0401192	-0.00519107	0
161.6	0.0102623	0.0663458	0.0178029	0.0391161	-0.0224399	-0.00923455	0.016806	-0.0181696	0.0150393	-0.000656743	0
161.8	0.0531177	0.014644	0.020965	0.0163897	-0.0136046	0.0116594	-0.0502419	0.0184328	0.0185949	-0.00226611	0
162	-0.0103494	0.0251728	-0.0132502	-0.0178679	0.0487648	0.00817377	0.00739687	0.0615374	0.0447253	0.0197009	0
162.2	-0.0144529	-0.0248362	-0.00402655	-0.0160778	0.0206665	0.0511596	-0.0130608	0.0245285	0.0300933	-0.00559012	0
162.4	-0.00257654	-0.0423628	0.00216288	0.0223938	-0.00366707	0.0321878	-0.0212391	0.00289051	0.0170794	-0.000902484	0
162.6	-0.00640648	-0.0263463	0.0139948	0.0230725	-0.00164688	-0.0186438	0.000551818	0.0349748	-0.0207684	0.018326	0
162.8	0.00104288	-0.0238995	0.00384308	-0.0358426	0.000207147	-0.0254951	-0.0143396	0.00248866	-0.0548059	-0.00962603	0
163	0.00425201	0.0160042	-0.0443558	-0.0409066	0.0217748	-0.0334822	0.00534413	-0.085621	-0.00431205	-0.0288637	0
163.2	0.00117831	0.0509194	0.0120878	0.0533702	0.00938381	-0.0281413	0.0784202	-0.00710242	0.0359486	0.0158292	0
163.4	-0.0106327	-0.0104373	0.0252672	0.0201458	-0.0254776	0.0466788	0.0147482	0.0851697	0.0215807	0.0263054	0
163.6	0.00907123	0.0013573	-0.0171214	-0.0313034	-0.00764396	0.00852849	-0.0212886	0.00717613	0.00105648	-0.0343546	0
163.8	0.0378619	0.0191965	-0.0159034	0.00884783	-0.00880297	-0.0231253	-0.0182137	-0.01233	-0.00117534	-0.0292301	0
164	0.000304201	-0.0061016	0.0108894	0.0229987	-0.0455207	-0.000800485	0.00364594	0.0158615	0.00232437	0.0396581	0
164.2	-0.0578002	-0.0118499	0.0049982	-0.0336516	-0.0318585	-0.0130265	0.0398999	-0.0366904	-0.0137552	0.0369346	0
164.4	-0.00712632	-0.00232301	-0.0043701	-0.0184313	0.0145271	-0.0129502	0.00859474	-0.0394791	-0.0391306	-0.0119276	0
164.6	0.0554632	0.00532376	-0.0104692	0.0141585	-0.0142804	0.0212809	-0.0492477	-0.0307622	-0.0171236	0.0228633	0
164.8	-0.0308366	-0.0216601	0.0230171	-0.0184687	0.00946292	0.00370347	0.0252148	-0.00788839	-0.00990679	-0.0157867	0
165	-0.0102743	-0.017396	0.00203394	-0.0129823	0.027504	0.0206529	0.0170062	-0.0498721	0.0170489	-0.0168751	0
165.2	0.0322949	-0.0146355	0.00249489	-0.00601764	0.0205458	0.0336683	-0.0591698	-0.00190758	0.0538812	0.00184572	0
165.4	-0.00262986	0.000731009	-0.0114429	-0.0228814	0.0291856	0.0023963	-0.0323049	0.0613216	0.0201609	-0.0202204	0
165.6	0.00396797	0.0430234	-0.0608064	-0.0216848	0.0318836	-0.0234959	0.0294932	-0.0118078	-0.0413821	-0.0241071	0
165.8	0.00830149	0.00509364	0.0247766	-0.0260905	-0.00664058	-0.0381183	-0.019538	0.00331887	-0.0228466	0.00325064	0
166	-0.0472396	-0.0116492	-0.0262063	0.029238	-0.0198585	-0.0147868	9.53754e-05	0.0293956	-0.076697	-0.00411479	0
166.2	-0.028742	0.032121	-0.0176036	0.0138273	0.0142167	0.0249195	0.0058375	0.0420019	-0.00148842	-0.0176488	0
166.4	-0.00152637	0.00817716	-0.0283835	0.00991654	-0.0361855	0.00236827	0.00240474	0.0124307	0.0133823	-0.00833397	0
166.6	-0.0280342	-0.0395021	-0.0292115	0.0318274	-0.0702696	-0.0166814	0.0580921	-0.00889342	-0.0175603	0.0361863	0
166.8	-0.022073	-0.0291836	0.0320417	0.0117742	0.00245249	-0.000197311	0.0861366	-0.0179544	-0.00229686	0.0626149	0
167	0.0357984	-0.0147154	0.0436151	-0.0175376	0.0350214	-0.0167141	0.011295	-0.0379334	-0.0112157	0.0191293	0
167.2	0.00777382	-0.00359802	0.0414877	-0.00200577	0.000182581	-0.00778209	-0.0181511	0.018562	0.0404349	-0.0166659	0
167.4	0.000359911	-0.0163051	0.0358155	0.0328836	0.00303915	0.00710439	-0.094766	-0.00207917	0.0052997	-0.00893012	0
167.6	0.014709	-0.0148561	0.00472722	0.00510154	-0.000688705	0.0237351	-0.0444418	-0.0219971	0.00935185	0.0266416	0
167.8	0.0106668	-0.0102931	-0.0205347	-0.0181064	-0.0149646	0.0379466	-0.0226487	0.0267929	0.0482972	0.0241899	0
168	0.00124796	-0.0147043	-0.0357688	-0.0007667	-0.00610465	0.0198711	-0.0469939	0.0412082	0.0374343	9.41791e-05	0
168.2	0.000783987	0.00143701	-0.0307144	-0.00343025	0.00790656	-0.0155611	0.00336582	-0.0283856	-0.0265504	-0.0245096	0
168.4	-0.00951143	0.030862	0.0160396	-0.014234	0.00814729	-0.00451024	0.034392	-0.0408148	-0.0497417	-0.0551734	0
168.6	-0.0112372	0.00980831	0.00618235	0.0292917	0.0365057	0.0188291	0.0659244	0.0316346	0.0614692	0.0130462	0
168.8	-0.0159069	0.0213888	-0.0129732	-0.0166596	0.00584814	-0.016101	0.027773	-0.00408098	0.0328815	-0.00817608	0
169	-0.0231743	0.00557964	0.00601484	0.0131847	0.0115943	0.000399628	-0.00692736	-0.0288684	-0.00881663	-0.0209961	0
169.2	-0.00744248	0.0258871	0.0310534	0.0265969	0.0157989	0.00742174	-0.0178497	-0.0114777	-0.0257087	0.00988622	0
169.4	0.00656226	0.0564724	0.0211683	-0.0196024	0.00457405	-0.0349694	-0.0150607	-0.00880397	-0.0353006	-0.00233222	0
169.6	0.00571063	0.00366766	-0.00866157	0.0010912	0.00607774	-0.0267628	0.00407557	0.00978269	0.00448784	-0.0282477	0
169.8	0.0374768	-0.00969624	-0.0170429	-0.0120009	-0.0581416	0.00975162	-0.0117078	0.0380717	0.026066	0.0137244	0
170	0.0201822	-0.00764129	0.00546734	-0.0364889	-0.0207884	-0.00761274	-0.0450948	-0.0132835	0.0402693	-0.00383547	0
170.2	0.025293	-0.0489696	0.0261753	-0.0216675	-0.00955521	-0.0318586	0.0242245	0.0401493	0.0295267	0.0371537	0
170.4	0.0273382	-0.054764	0.00595158	-0.00795146	0.00975638	0.00540841	0.0446747	0.0385176	-0.00795469	0.0149094	0
170.6	0.00350522	-0.00706195	-0.020236	0.0092748	0.0129872	0.0158876	-0.00565437	-0.0125772	-0.0655676	-0.00947939	0
[truncated: 382 more rows]

## Sheet: SEM
Time	gamma-5	gamma-4	gamma-3	gamma-2	alpha	stimulus
[truncated: 101 more rows]

[truncated: 1 more sheets: Average_left_right _combined]
