# Supplementary material for: Multiphoton imaging of neural structure and activity in Drosophila through the intact cuticle
Source: eLife. 2022 Jan 24;11:e69094. doi: 10.7554/eLife.69094 (PMC8846588; doi:10.7554/eLife.69094)
Supplement: Figure 7—source data 4. [file elife-69094-fig7-data4.xlsx]

## Sheet: Long_term_12hr
20200806	fly1
20200807	fly2
20200813	fly3

## Sheet: fly1
Time	gamma-L5	gamma-L4	gamma-L3	gamma-L2	alpha-L	gamma-R5	gamma-R4	gamma-R3	gamma-R2	alpha-R	stimulus			Time	gamma-5	gamma-4	gamma-3	gamma-2	alpha	stimulus
0											0			0	0.000960385	-0.00394172	-0.0106803	-0.0027113	-0.00508232	0
0.2											0			0.2	0.00473003	-0.0196483	-0.0201025	-0.00824886	-0.00563715	0
0.4											0			0.4	0.00198221	-0.00256149	-0.00443219	-0.0133923	-0.0133522	0
0.6											0			0.6	0.00703945	-0.0121187	-0.00710604	0.0160148	-0.00697905	0
0.8											0			0.8	0.00140359	-0.0224019	-0.0100623	0.00783267	-0.00389525	0
1											0			1	-0.000188228	-0.0176298	-0.0135732	-0.010458	-0.00318574	0
1.2											0			1.2	0.00810159	-0.00298737	-0.00917542	0.00201838	-0.00230958	0
1.4											0			1.4	0.010306	-0.00317701	-0.00582121	0.00925858	0.00115445	0
1.6											0			1.6	-0.00892414	-0.0117252	0.000876017	0.00305784	0.0145209	0
1.8											0			1.8	-0.000801925	0.01733	0.000105463	0.000537738	0.00883279	0
2											0			2	0.00376232	0.0153952	0.0105222	-0.0037913	-0.00190797	0
2.2	0.00365776	-0.0177546	0.0132145	-0.0191152	-0.0114355	-0.0146281	0.0245532	-0.00372203	0.0209681	-0.00459651	0			2.2	-0.00340717	0.0172901	0.0122681	0.0112611	0.00193341	0
2.4	0.0176127	-0.0304741	-0.00669325	-0.0258502	-0.0154904	-0.0095317	0.0208463	-0.00627455	0.0222654	0.0149538	0			2.4	-0.00936295	0.00189774	-0.00797816	0.00416843	0.0100199	0
2.6	0.0356319	-0.0150297	-0.0177943	-0.0235991	-0.00669834	0.0114575	-0.00537952	0.0180157	0.0301461	0.0138388	0			2.6	-0.010918	-0.00189688	-0.00276361	-0.0228174	0.00414575	0
2.8	0.0283766	-0.0290039	-0.0378536	-0.00101185	0.0120775	-0.0167331	-0.0274087	0.0336112	0.0350158	-0.0176148	0			2.8	-0.00296185	0.0112117	0.0272152	-0.0273391	-0.00784477	0
3	0.039471	-0.00392242	0.0553921	0.0561222	0.0278645	0.00324282	0.0119737	-0.0408379	-0.0110401	-0.0264096	0			3	-0.000702301	-0.0166524	0.0150038	0.00509027	-0.0109829	0
3.2	0.00814161	0.0216123	-0.00908184	0.0255085	0.0246613	0.0172521	0.0555434	0.00803166	-0.0220275	-0.0108468	0			3.2	-0.00594456	-0.0049224	-0.022992	-0.00650232	-0.000539692	0
3.4	-0.00697006	0.00192495	-0.0491319	0.00495964	-0.0188758	-0.0143335	0.0288909	0.0371514	-0.00557437	-0.00117286	0			3.4	-0.00646296	-0.0044706	-0.00731075	-0.00515754	0.00663913	0
3.6	-0.0172386	-0.0220954	0.0316561	0.0244102	-0.0216244	-0.0421147	-0.034214	0.00603882	0.00285667	-0.00396003	0			3.6	-0.00678159	-0.00192449	0.000759528	0.0381472	0.0121124	0
3.8	-0.0534506	0.0120255	0.0292607	0.0054395	0.0309657	-0.0135596	-0.0650421	0.0170381	0.00711212	-0.0105611	0			3.8	0.000382722	0.00104966	0.00803976	0.00900324	-0.0120418	0
4	-0.023236	0.0441192	-0.00130222	0.0100156	0.00662176	0.0348132	-0.0683271	-0.0530975	-0.0104838	-0.0211424	0			4	0.00055054	-0.00284446	0.00885212	-0.00327734	-0.000524039	0
4.2	-0.0293517	-0.0450712	0.0224775	0.00911731	-0.00112867	0.0111342	-0.0394484	-0.0548773	-0.0329127	-0.0147927	0			4.2	-0.0043177	0.0059078	0.000827358	0.000101316	0.00676925	0
4.4	-0.00534935	0.00951163	-0.00663777	0.0073879	-0.0283884	-0.00344195	0.00647203	-0.0431316	-0.0251831	0.0150068	0			4.4	0.0080496	-0.0173843	-0.0160242	-0.00718664	-0.00183025	0
4.6	0.0343297	0.0845826	-0.0078035	0.0266049	-0.0130125	0.00947659	0.032838	0.0154615	-0.00157077	0.0151094	0			4.6	0.00927375	0.00241992	0.00721518	-0.0146889	-0.00771964	0
4.8	0.0326806	0.0311187	0.00643553	0.0353642	0.012946	0.000644232	0.0461413	0.0587724	0.00970497	-0.00265277	0			4.8	0.00738877	0.0111227	-0.00351142	-0.0124317	-0.00597964	0
5	0.0190016	-0.0205042	-0.00562937	-0.00468806	-0.00722976	0.00310257	0.0522237	0.0349912	0.00361902	0.00981893	0			5	0.00619887	0.000284215	-0.0174984	-0.00751662	-0.008068	0
5.2	0.0282503	0.00293942	-0.00297331	-0.0514402	-0.00288067	0.0510493	0.0412083	0.00794716	-0.0138348	0.0418346	0			5.2	-0.000517556	0.0221304	0.00354712	-0.00027221	0.00860091	0
5.4	0.00464478	-0.0632764	-0.00753577	-0.036279	0.0556083	0.0372575	0.0270037	-0.00280563	-0.0319604	0.0442148	0			5.4	-0.00856632	0.0104219	0.0147093	0.0147883	0.00720669	0
5.6	0.00741541	-0.0422841	0.0251902	-0.0186475	0.0168147	-0.00138136	-0.0215836	0.0351329	-0.0112252	0.00800993	0			5.6	0.0149197	0.0003991	0.00232005	0.00917816	-0.0134166	0
5.8	0.0121918	0.00553581	0.00864181	0.0247034	-0.0071017	-0.0144248	-0.0236452	-0.0272754	-0.00928142	0.013876	0			5.8	0.0133846	-0.00539016	0.0156061	-0.00418717	0.00468367	0
6	-0.00325061	0.0155207	-0.0294726	0.0209644	0.0273364	-0.000412424	-0.00525727	-0.055188	-0.0142346	0.0131464	0			6	0.00636475	0.00721213	0.00174287	0.00403493	0.0081737	0
6.2	-0.0145818	-0.00595904	-0.00557289	-0.026457	0.0226937	0.0106715	0.0187372	-0.0206885	0.0152541	0.00651426	0			6.2	-0.00877973	0.00421565	-0.0156997	0.0128435	-0.00207301	0
6.4	-0.0119831	-0.00856485	0.0139215	-0.0387967	-0.0276151	-0.0070411	0.00924735	-0.0392604	0.0403515	0.00971789	0			6.4	0.00468246	-0.000648932	-0.00398236	0.0100451	0.000986662	0
6.6	-0.0255952	0.00678555	-0.0345092	0.00336503	-0.0233509	-0.0299135	-0.0550023	-0.045611	0.00828928	-0.0247885	0			6.6	0.0247981	0.00263592	0.0311556	-5.88292e-05	0.0246124	0
6.8	-0.0425725	-0.049341	0.0264942	0.0769986	-0.00611407	-0.0100899	0.0169018	0.0230446	-0.00956186	-0.02296	0			6.8	0.00474007	0.00549347	0.0294011	0.0100581	0.0133679	0
7	0.00165821	0.0299259	0.013675	-0.00842029	0.0106625	-0.0391657	0.0200397	0.0150494	0.0111608	-0.0204377	0			7	0.00988882	0.0166114	0.0180515	0.0235899	0.0115067	0
7.2	-0.00872769	0.0125378	-0.0199942	-0.0442647	-0.0305557	0.00490196	-0.0210529	-0.0330212	-0.00558239	-0.012264	0			7.2	0.0108771	0.0198948	0.0305358	0.0293685	0.013132	0
7.4	-0.0316805	0.00330596	-0.0322334	-3.12464e-05	-0.0268641	0.022375	-0.0193941	-0.000564486	-0.00732593	-0.0153832	0			7.4	0.03184	0.0107397	0.0398939	0.0362232	0.0210482	0
7.6	-0.0147995	0.054798	-0.00474915	0.00744888	-0.00533009	-0.0186883	-0.00359526	0.0595795	0.0371818	-0.0240604	0			7.6	0.0201849	0.0382572	0.0212521	0.0220551	0.040235	0
7.8	-0.0049586	0.0221913	0.0331658	0.000645496	-0.0290831	-0.00623128	-0.0068278	0.0336818	0.0445215	-0.0247897	0			7.8	0.0164715	0.0337759	0.0328848	0.0304955	0.0267409	0
8	0.0154837	0.0249001	-0.00683889	0.0338679	0.0327609	-0.0123165	-0.00133887	-0.00253302	-0.00275747	-0.0350632	0			8	0.0269581	0.0190033	0.0558768	0.0306834	0.0276733	0
8.2	0.0337336	0.00509025	0.0361064	0.0356698	0.0050674	-0.0269698	-0.034628	0.0260068	-0.0245689	0.00765067	0			8.2	0.0254792	0.043832	0.0374954	0.0450263	0.0261568	0
8.4	0.000278129	-0.0316851	0.0153428	0.0110624	0.0120425	-0.0412473	-0.0190283	0.00031195	-0.0104751	0.0170746	0			8.4	0.0262532	0.0422461	0.0438482	0.0539283	0.0169093	0
8.6	0.0140168	-0.0143995	0.018102	-0.0123576	0.00625709	-0.0361461	-0.0188912	0.0169839	0.00155172	0.00589379	0			8.6	0.0156168	0.0475468	0.0525334	0.0326323	0.0218456	0
8.8	0.0294929	-0.0191537	0.0179794	-0.0288447	-0.0357516	0.0117994	-0.0301785	0.0291459	0.00406452	0.00434159	0			8.8	0.0154302	0.0413127	0.0457766	0.040338	0.0388971	0
9	-0.0198747	-0.0477593	-0.0332738	0.00558778	-0.026435	0.0460136	-0.0136449	-0.00972892	-0.011618	-0.00445874	0			9	0.0319998	0.046751	0.0484052	0.044386	0.0316639	0
9.2	-0.033218	0.0150459	-0.0278663	0.0665323	0.0274337	0.0196632	0.00401049	-0.0127793	-0.0364387	-0.0279847	0			9.2	0.0261764	0.040058	0.0506834	0.0492653	0.0303047	0
9.4	0.00626072	0.050545	4.6331e-05	0.00419199	0.0152382	0.0265854	0.0343193	-0.0467138	-0.00168796	-0.0373707	0			9.4	0.0201612	0.0563795	0.0538396	0.0376085	0.0398026	0
9.6	-0.0320231	-0.0131919	0.00414455	-0.00767443	-0.0129487	0.00849739	0.00992403	-0.00247493	0.0176252	-0.00815963	0			9.6	0.0332875	0.0623016	0.0545694	0.0511288	0.0333046	0
9.8	0.00805367	0.0143508	0.012072	-0.0600043	-0.026411	-0.0278486	0.0559083	0.029198	-0.00414258	-0.00286071	0			9.8	0.029015	0.0633452	0.0699514	0.0554539	0.0284412	0
10	0.0207095	0.0166494	-0.0191288	-0.0753404	-0.0213862	0.00940585	0.030985	-0.00179716	0.00989391	0.00231462	0			10	0.0386925	0.0949462	0.0655178	0.0747893	0.0443785	1
10.2	-0.00486369	-0.0116665	-0.0144383	-8.40018e-05	-0.00639059	0.0378794	0.00160392	-0.0277937	0.0224615	0.0231972	0			10.2	0.0943375	0.147926	0.114382	0.101063	0.0821882	1
10.4	0.0378184	0.0208293	0.0506301	0.0321329	0.00255865	-0.0129469	0.0722957	0.000130399	0.00345081	0.0363818	0			10.4	0.125014	0.153997	0.134483	0.124226	0.0983635	1
10.6	0.0494124	-0.00642819	0.0312276	-0.0110694	-0.00433014	-0.00168307	0.0364118	0.0169137	0.0194982	0.0378361	0			10.6	0.102792	0.141793	0.123247	0.119546	0.0847465	1
10.8	0.0105585	-0.0318277	0.0190939	0.0247012	-0.0137087	0.0344833	-0.00141847	-0.0351733	-0.0359433	-0.000329621	0			10.8	0.0974265	0.147028	0.124991	0.106919	0.0717662	1
11	-0.00412715	-0.0174152	-0.0184214	-0.0124802	0.00481912	-0.031352	-0.0242725	0.0117749	-0.0125297	-0.021561	0			11	0.0720986	0.116336	0.107597	0.103208	0.0635557	1
11.2	0.00449861	-0.0252709	0.00943585	0.000610108	-0.00179253	-0.0233944	-0.017455	0.00385675	-0.0356395	0.0126183	0			11.2	0.0525906	0.102679	0.0832347	0.089371	0.0445552	1
11.4	0.00260903	0.0071661	0.00633918	0.018203	-0.00200647	0.0100501	-0.0314208	0.00467648	-0.0182084	0.00407004	0			11.4	0.0605702	0.0941459	0.0612687	0.0629283	0.0339416	1
11.6	-0.00934644	0.0364239	-0.0399529	-0.00644787	0.0145271	0.00692634	-0.0406538	0.0314681	0.0472994	-0.0221313	0			11.6	0.0523474	0.0895585	0.0599395	0.0471332	0.0345285	1
11.8	-0.0104467	0.00848636	0.0080778	0.011652	-0.0122478	0.0330618	-0.00084364	-0.016821	0.0166986	0.0232847	0			11.8	0.0279439	0.0634718	0.047427	0.0356306	0.00136456	1
12	-0.00411253	0.0656183	0.0583875	0.0225463	-0.0344191	0.0182257	-0.0122765	0.00361278	0.00228903	0.016879	0			12	-0.000597109	0.0413664	0.0265081	0.0190463	-0.0127919	1
12.2	-0.00645025	-0.0107778	0.00854079	0.0455893	0.0369123	0.0258647	-0.0306422	-0.00437561	-0.0317067	-0.028683	0			12.2	-0.0024976	0.0363914	0.0367376	0.0276018	-0.00353785	1
12.4	-0.00567132	-0.0227219	-0.0450606	0.0226588	0.00960885	-0.00866713	-0.0239978	-0.0283591	0.00839264	-0.0244773	0			12.4	0.00200421	0.0452525	0.0218759	0.0263827	-0.016652	1
12.6	-0.0025225	0.0124317	0.0114803	-0.0135988	-0.0166417	-0.0425487	0.00811738	-0.0231187	0.0340491	0.00168805	0			12.6	-0.00236271	0.0339587	0.00993678	0.00473932	-0.00735245	1
12.8	0.00525966	-0.00581504	0.030204	-0.0157954	0.0152835	0.0179338	0.0218436	0.009515	-0.00822926	0.0170522	0			12.8	-0.0160566	0.0233028	0.0110368	0.0106358	-0.0161215	1
13	0.00358558	-0.0330519	-0.0414085	-0.0150209	0.0322507	0.0582635	0.0102034	0.0394233	-0.024662	0.024429	0			13	-0.0179111	0.0390432	0.00378396	0.0218873	-0.0331399	0
13.2	-0.0162593	-0.0257005	-0.0405512	-0.0203525	0.0226607	-0.0366025	0.00764542	0.042585	0.0127099	0.017733	0			13.2	-0.0186546	0.0260946	-0.0259586	-0.0166489	-0.0239036	0
13.4	-0.00626549	-0.0390344	-0.0457617	0.0283316	-0.00565713	-0.0274849	-0.00359056	0.0127248	0.00193672	0.0111804	0			13.4	-0.0422226	0.00636267	-0.0270399	-0.0181493	-0.0226911	0
13.6	0.00273428	0.0181832	0.00131884	-0.0173792	0.0517851	-0.00961152	0.0220511	-0.013084	0.0135415	0.0148284	0			13.6	-0.0339082	-0.00150002	-0.0117096	-0.00160352	-0.0311421	0
13.8	-0.0320322	0.0166026	0.0404379	-0.0578801	0.0266882	-0.0104838	0.00674563	-0.00768551	-0.0100732	-0.0184361	0			13.8	-0.0194047	0.00788786	-0.0187721	-0.019283	-0.0340336	0
14	-0.00867072	-0.0318055	0.00158696	-0.0275336	-0.0279762	-0.0134193	-0.0135974	-0.0267864	0.0072464	-0.0204283	0			14	-0.0145243	-0.000763254	-0.0103842	-0.0296343	-0.0320284	0
14.2	0.0199683	-0.00603801	-0.02153	0.0105711	-0.00568298	-0.031094	-0.0041246	-0.019553	0.029814	0.0152108	0			14.2	-0.00957419	-0.00428956	-0.0171081	-0.0144345	-0.0276017	0
14.4	-0.0174017	0.0408022	-0.00885434	-0.000576697	0.0106663	-0.0405327	-0.00861732	0.0234911	-0.00765839	0.00328296	0			14.4	-0.00639	0.00327189	-0.00942488	-0.0102743	-0.0236038	0
14.6	0.00284856	-0.0204706	-0.0478627	-0.0226887	-0.0349818	-0.00794725	-0.0209848	-0.0234481	0.0101107	-0.0357008	0			14.6	-0.0140378	0.00379098	-0.0227358	-0.0246064	-0.0276249	0
14.8	-0.0211157	-0.0224813	0.0672228	0.00669208	-0.0162573	-0.02416	0.000930464	-0.011205	-0.00203032	-0.0212517	0			14.8	-0.0224475	-0.00861837	-0.0225807	-0.0285459	-0.0303337	0
15	-0.0176998	0.0793996	0.00327673	-0.00132401	-0.0194577	-0.00479527	0.0208158	-0.000479335	0.000489992	-0.000131869	0			15	-0.0234966	-0.00922632	-0.0195033	-0.00933126	-0.0273008	0
15.2	-0.0222231	0.053258	-0.00557457	-0.000269634	-0.0068436	0.0313159	0.046806	0.0270746	-0.0159759	0.0036395	0			15.2	-0.000896245	-0.00126372	-0.0378298	-0.000769978	-0.0278277	0
15.4	-0.0193562	-0.0386975	0.0410111	0.0128834	-0.011812	0.00322053	0.0281501	0.0350212	-0.0344702	0.0133978	0			15.4	-0.00846435	-0.0137124	-0.0197641	-0.0265608	-0.0388733	0
15.6	0.0190109	-0.0336172	-0.00902919	0.0139368	-0.025773	-0.016538	-0.0106704	-0.00743426	-0.0351448	0.00624231	0			15.6	-0.0282761	-0.0236457	-0.0278858	-0.0213556	-0.0244957	0
15.8	0.0386789	-0.00531975	-0.0471886	0.027934	0.0125004	0.0324733	0.00866195	-0.0330716	-0.0231349	-0.0251751	0			15.8	-0.0332996	-0.0160695	-0.0338735	-0.0138071	-0.0204467	0
16	0.0178148	-0.0194695	-0.0126933	0.039994	0.00968946	0.010519	0.00972954	-0.0111006	0.018324	-0.00169566	0			16	-0.0149166	-0.00643925	-0.0165962	-0.0244014	-0.014931	0
16.2	0.00915583	0.0090611	0.0595964	0.0217972	0.0128833	0.046254	-0.014448	0.0119428	-0.0412372	0.00712503	0			16.2	-0.0119776	-0.0137404	-0.0116838	-0.0112264	-0.0173114	0
16.4	0.0309242	0.0242535	-0.00587454	-0.012042	0.0135934	0.047479	-0.0405469	0.00785176	-0.0194633	0.033676	0			16.4	-0.0218246	-0.0149685	-0.0178242	-0.0158539	-0.0213784	0
16.6	0.0273351	-0.0126902	-0.0116109	-0.0345405	0.024359	-0.0067805	-0.0173417	0.00562649	0.0215583	0.009389	0			16.6	-0.00839089	-0.0124563	-0.00273075	-0.00196027	-0.0122683	0
16.8	0.0126649	-0.0470001	0.0171892	-0.0184869	0.0294849	-0.0279018	-0.00101354	0.0360266	0.0178174	-0.0139575	0			16.8	-0.00801114	0.00102628	-0.0225262	0.0153583	0.000705626	0
17	0.0136736	-0.0296231	-0.0412132	0.0282658	0.0206803	-0.0188143	-0.046512	0.0180432	-0.00099581	0.0171159	0			17	-0.0198393	-0.00548016	-0.0232664	-0.00108491	-0.0145211	0
17.2	-0.00690884	-0.00551254	-0.0231123	0.0337043	0.0238108	-0.0263017	-0.0525075	-0.0822978	-0.023872	0.0217663	0			17.2	-0.0239863	-0.000118771	0.0062297	-0.0196581	-0.0184858	0
17.4	-0.0176869	-0.0275052	0.0368914	-0.0339851	0.00390406	0.0345822	0.0321465	-0.0413906	0.0247647	0.0502222	0			17.4	0.00589647	0.0102232	-0.00326374	-0.0199335	-0.00822231	0
17.6	0.00399097	-0.0104964	0.0283087	0.000971714	-0.0216936	0.0112954	-0.0034881	0.0366175	0.000653054	0.0262109	0			17.6	-0.00115059	-0.0140349	-0.0108418	-0.0236244	-0.00537564	0
17.8	-0.00195303	0.00794398	0.00533524	0.0207529	-0.0245011	0.00853401	0.0119239	0.037853	0.0134648	-0.0188284	0			17.8	-0.00789217	-0.0160899	-0.00371037	-0.0110886	0.00790621	0
18	-0.0117574	0.0249265	-0.0112243	0.00498853	-0.00797835	0.0165579	0.0532093	-0.00555635	0.0108211	-0.0169434	0			18	0.0118992	-0.0218838	-0.00718164	-0.0136045	0.000314228	0
18.2	-0.0161838	0.0493301	-0.00852513	0.0102325	0.0058654	-0.00317901	0.0248283	-0.00664842	-0.0231608	-0.0116062	0			18.2	0.012169	0.00221551	-0.00580215	-0.000394035	-0.00384834	0
18.4	-0.0278163	0.0208974	0.00236303	0.0122527	-0.00797982	-0.0133326	0.00610269	0.0113019	0.00496834	-0.0341404	0			18.4	0.00940543	0.00641075	0.00166558	0.00453269	0.00271011	0
18.6	-0.00351375	-0.046133	-0.0364281	-0.00902504	-0.0355667	-0.0242358	0.0294714	-0.0163007	0.0287486	-0.014809	0			18.6	0.00591311	-0.0157504	-8.04976e-05	-0.0066883	0.00115734	0
18.8	0.00120404	0.0249174	-0.0157209	-0.0238816	-0.00413148	-0.004242	0.00534194	0.0324251	0.0111294	-0.0237164	0			18.8	-0.00232076	-0.00831408	-0.00142433	0.00791783	0.0067372	0
19	-0.00503088	0.0187397	0.0407153	-0.0182011	-0.0331606	0.000847094	-0.010608	0.0270063	-0.00895998	0.00706677	0			19	-0.0064619	0.00351916	-0.00828977	0.0168814	0.00413581	0
19.2	-0.0114716	0.0204185	0.067744	-0.0155161	0.00747359	0.0109763	-0.0188351	-0.0182146	0.0121413	0.00375743	0			19.2	-0.0133942	-0.0159191	-0.0164716	-0.00293387	-0.000100924	0
19.4	-0.0293623	0.0282579	0.0192769	-0.0195285	0.048191	0.00683178	0.0235654	-0.0267395	0.0169619	-0.0177047	0			19.4	-0.00976632	-0.000935574	-0.000772532	0.0246208	0.00607335	0
19.6	-0.00966671	-0.000455941	-0.0120957	-0.0139536	-0.00340141	-0.0128603	0.0258516	-0.0136967	-0.00396012	0.000649635	0			19.6	-0.0104018	0.0206209	0.0307095	0.00350908	-0.00458437	0
19.8	0.0495819	0.00243621	0.0242904	0.0295836	-0.0258837	-0.00688114	-0.0572159	-0.00693996	0.00722927	0.00401023	0			19.8	0.00914588	-0.0025682	0.00421386	-0.0230191	0.00103789	0
20	0.00854333	-0.0184578	-0.0403546	0.0894289	-0.0181709	-0.00916616	0.0424887	0.0228279	-0.0078902	-0.0217606	0			20	0.00734178	-0.0114905	-0.00626127	0.00185605	0.00867034	0
20.2	-0.00325668	-0.00511978	-0.0302011	-0.0193793	0.00240104	-0.00276451	0.0303261	-0.00309619	-0.0355838	0.019809	0
20.4	0.0426583	-0.0133969	-0.0102942	-0.0346287	0.00127434	0.00793269	-0.0414697	-0.0261531	0.0314741	0.0324718	0
20.6	0.020236	0.0121349	-0.032571	-0.00688308	-0.00431811	-0.000210339	-0.051743	-0.0301084	0.0219727	0.0118571	0
20.8	-0.0206248	0.0508703	-0.0168284	-0.0305934	0.00531017	0.00150697	-0.0153511	0.0350719	-0.0156789	0.0036897	0
21	0.00526761	0.0300917	0.0202462	-0.0143005	0.00686982	0.0224516	-0.00128914	0.0677316	0.0301779	0.0103042	0
21.2	-0.00286892	-0.00697267	-0.0253684	0.0343527	-0.0112924	0.0133915	-0.0121173	-0.058354	0.0118061	0.0075004	0
21.4	-0.020776	-0.0448363	-0.0217507	-0.00163045	-8.61175e-05	0.00630246	0.00336668	0.00406782	0.0174851	-0.0337902	0
21.6	0.014171	-0.0521134	0.0121694	-0.0145335	0.0275689	0.0250367	-0.00796279	0.0164391	-0.0303158	-0.02283	0
21.8	0.0161472	-0.0250382	-0.0308337	-0.0164592	0.0180295	0.0187792	-0.0225172	0.0195839	-0.0166856	0.00112048	0
22	0.000856279	-0.0373616	0.015851	-0.00036137	0.0155173	-0.0206468	0.00883377	0.00550363	0.012149	-0.00184702	0
22.2	0.00335776	-0.00621466	0.0842554	0.010693	0.0335383	-0.0375424	0.0459282	-0.00554389	-0.00917934	0.00297492	0
22.4	-0.0122704	0.0799921	-0.0179747	-0.013201	0.0168551	-0.00622461	0.0394334	0.0287022	0.00566184	0.0228313	0
22.6	-0.0277934	-0.0133856	-0.0478352	0.0134546	-0.0147678	0.0137331	0.0268192	-0.0105096	0.045144	0.00596533	0
22.8	-0.00868636	-0.0300312	-0.0204451	0.0590435	-0.0180528	-0.0252852	-0.0098928	0.00885079	-0.0300658	-0.00597631	0
23	-0.0154481	0.00642412	-0.00886418	-0.0179834	-0.000210408	-0.0231327	0.00163266	-0.00710663	-0.0167899	-0.00541836	0
23.2	-0.0208656	0.0489591	-0.0286209	-0.0189238	-0.00872103	0.0255422	0.0152613	-0.0271111	0.0308674	-0.00648131	0
23.4	-0.00295533	0.0554352	-0.0178463	0.0271692	-0.0130099	0.0159054	-0.00334355	-0.0168276	0.0265781	-0.00121282	0
23.6	-0.00386834	0.0140851	0.0441662	-0.0141241	-0.00371593	-0.0169796	-0.0148507	-0.018511	-0.00315368	0.00387499	0
23.8	-0.0188556	-0.0216975	0.0633112	-0.0429886	-0.0219795	0.0134216	-0.00921394	-0.017264	-0.020326	-0.00569986	0
24	0.0236213	-0.0279756	0.0024999	-0.0357992	-0.0113841	-0.0152243	-0.0148889	0.0325173	0.00150518	-0.00285244	0
24.2	0.0286954	-0.0130252	0.0421072	-0.00111874	0.00684732	0.038406	0.0124318	-0.00991444	-0.0329974	-0.0225266	0
24.4	0.0025701	0.0139429	-0.0129113	0.0581223	0.0122909	0.000471842	-0.0249422	-0.0194083	-0.0542371	-0.0141196	0
24.6	-0.0283072	0.0329246	-0.0319164	0.0845504	-0.00631644	-0.0289269	-0.0188921	-0.00321958	-0.0176848	0.00960714	0
24.8	-0.0231179	0.00741704	0.0462707	0.0548044	-0.0203207	0.0228703	0.0295482	-0.00431565	0.017161	0.00307462	0
25	0.0128306	-0.0290169	0.0474754	0.00290858	-0.00992606	0.0129625	0.0185884	0.0286309	0.0126804	0.00716005	0
25.2	0.0219053	-0.00419846	-0.0180908	-0.0470582	0.000395513	-0.0486136	0.0139507	0.0584738	0.00814246	0.0446023	0
25.4	0.0406261	0.00538724	-0.0428975	-0.0620375	0.0172462	-0.00232894	-0.00338641	-0.0401895	0.00663199	-0.0231297	0
25.6	-0.0182295	0.0166329	-0.00267957	0.00898765	-0.00321362	0.0138242	0.00345395	-0.0605189	0.0295277	-0.0223743	0
25.8	-0.02812	0.012381	0.0357222	0.0519528	0.00126105	0.0127414	0.0106397	-0.00761936	0.00765449	-0.00659683	0
26	-0.0112485	-0.0200585	-0.000809143	0.0234046	-0.000372346	0.0166477	0.0139334	0.0109636	0.011239	-0.0176992	0
26.2	-0.00781727	-0.0536593	-0.0334782	-0.0206365	-0.0139117	-0.00868595	0.00205962	0.0104622	0.0383978	0.00437423	0
26.4	0.0230406	-0.0375727	-0.000205476	-0.00899947	0.00383464	-0.0290608	-0.0279175	0.028395	-0.00126596	0.0330969	0
26.6	-0.000607924	0.027444	-0.0263731	0.0502886	-0.0113705	0.0207576	-0.0227358	0.015017	-0.0100343	-0.0160334	0
26.8	-0.0261894	0.00753908	-0.00510516	-0.0478955	-0.0037894	0.0354607	-0.0282327	0.0517334	0.00240769	-0.0245226	0
27	0.0204872	-0.0430838	0.00588206	-0.0377434	0.0103901	0.0175133	-0.00396113	0.00784035	-0.00933954	-0.0243878	0
27.2	0.0129536	0.000158495	0.0335581	0.00526507	0.0144165	-0.0231016	-0.00517854	-0.0222705	-0.000876187	-0.00455572	0
27.4	-0.00540432	0.0322603	0.035586	-0.0236186	-0.0238443	-0.0387151	-0.003523	0.00918626	-0.00698047	0.0316434	0
27.6	0.0168386	-0.00403738	-0.00661164	-0.0198906	-0.0529244	-0.00903117	0.0217923	0.0288848	-0.0350016	0.0341348	0
27.8	-0.0201793	0.0130264	-0.00209306	0.0230366	-0.0055508	0.0104749	0.00289807	0.026236	0.00336535	0.0012786	0
28	-0.000284175	0.00326707	-0.0065554	-0.0325093	-0.00330802	0.0107787	0.0119969	0.00914118	0.0379491	-0.0107948	0
28.2	0.0250799	0.0492986	-0.0142043	-0.0288333	0.0314984	0.00203428	0.0241339	0.0222374	0.0135401	0.00320645	0
28.4	0.0277642	0.00139179	-0.000804656	0.0178985	0.029249	0.00873982	0.0172085	0.000292649	0.000796935	0.0336287	0
28.6	-0.0109933	-0.0191235	0.000501838	0.0749019	0.0197688	-0.00781496	-0.00940614	-0.0225166	0.00420174	0.00738095	0
28.8	-0.0165802	0.0123315	-0.019299	0.044345	0.0124467	-0.0190812	-0.0108253	-0.0166513	0.00451343	-0.035261	0
29	0.0273212	-0.00861281	-0.0300238	-0.0531181	-0.000743374	0.0139956	0.0288562	-0.013233	0.00753203	-0.014904	0
29.2	-0.00388175	0.0264003	-0.0319366	-0.00108029	0.0295595	0.0183389	0.0274134	-0.00802188	-0.000721403	-0.00673661	0
29.4	-0.00749157	0.0251948	-0.0247579	0.0445662	-0.0293365	0.0038008	-0.0372247	-0.0270138	-0.0109028	-0.0300768	0
29.6	0.0142275	-0.0573806	-0.00200613	-0.0195913	-0.00274731	-0.015041	-0.0141948	-0.0706307	-0.0172289	-0.0113537	0
29.8	-0.0270996	-0.0337603	-0.0173018	-0.00625734	0.00350122	0.016075	0.0112347	-0.0170147	-0.014062	0.00948817	0
30	-0.0485774	-0.00638585	0.0267714	0.0030077	-0.0239063	0.019875	-0.0128162	0.0317475	-0.00925864	0.0229402	0
30.2	0.00265676	-0.0484085	0.0773623	-0.0247221	-0.00532458	-0.0316173	-0.0184782	0.00273074	-0.0192978	0.0240816	0
30.4	0.0202537	-0.0104752	0.00756463	0.0283536	0.0213629	-0.0364866	0.00266642	-0.00577599	-0.0238904	-0.0118353	0
30.6	0.000122988	0.0133901	0.0230032	-0.0181233	0.0195764	-0.0101608	0.00024146	-0.0266266	0.00956327	-0.01794	0
30.8	0.0143767	-0.0125864	0.00644176	-0.0151202	-0.0223905	-0.0132716	0.0257916	0.000499538	-0.00822864	0.0233278	0
31	0.0218324	0.0477062	-0.0143187	0.0147041	-0.0159679	-0.0389145	-0.0303081	-0.00122347	-0.033951	-0.00888828	0
31.2	0.00920864	0.0426811	0.0334876	0.0145546	0.00977438	0.00994655	-0.0447315	0.0241482	0.00980692	-0.00764659	0
31.4	-0.0278633	0.00583532	0.00407686	0.0148769	0.018168	0.0510441	-0.0326487	0.0463782	0.0449863	0.0175609	0
31.6	-0.0364098	0.030387	-0.0797612	0.000999844	0.0156799	0.00661736	-0.0431752	0.0174612	0.00954001	-0.0112852	0
31.8	0.023415	-0.0133441	0.000882023	-0.0592808	-0.0107462	-0.00900588	0.0329272	0.0179454	-0.00738182	-0.00165107	0
32	0.00377606	-0.0118435	-0.017854	-0.0265798	-0.0389205	-0.0129016	0.0378377	-0.00129261	-0.0174886	0.0185009	0
32.2	0.0212896	-0.0072035	-0.0407154	-0.00815814	-0.0175445	0.0122115	0.0104657	-0.0179228	-0.0537309	-0.0090826	0
32.4	-0.000520747	-0.0100339	0.0326397	0.0236191	0.000968959	0.0231869	0.00625857	-0.00586318	-0.00781143	0.00437571	0
32.6	-0.021347	-0.0148199	0.0388742	0.00537266	0.0248707	-0.00528937	0.0210568	-0.0110991	0.0438177	0.0167522	0
32.8	-0.0100379	-0.00657989	-0.028842	0.00242407	0.025982	-0.0225862	0.00566462	-0.0260329	0.0167139	0.00265016	0
33	-0.0127535	0.0181433	-0.00813116	0.0594337	-0.0165077	0.00611649	-0.00329131	-0.011777	-0.00660029	-0.000375291	0
33.2	0.016543	0.00898355	0.0193025	-0.00625859	0.00193487	0.0177123	0.0528897	-0.0136899	0.00600747	-0.0203246	0
33.4	0.0297715	-0.0565034	-0.0285525	0.0356205	0.0283102	-0.0146979	-0.0310317	-0.00814067	-0.0402603	0.0202091	0
33.6	0.00950499	-0.0554694	-0.0283602	-0.00429264	0.000319347	0.0105334	-0.0366128	0.0524867	-0.017731	-0.0389572	0
33.8	-0.015478	0.0210678	0.0211568	-0.0266111	-0.00721157	0.0088992	0.0100364	0.0453764	0.0360331	0.000901551	0
34	-0.0170805	0.0288268	0.0311017	-0.032411	0.00974854	-0.0208553	0.00875871	0.0305582	0.0434528	0.0405914	0
34.2	-0.0166549	-0.0189204	0.0110829	-0.0409298	0.00513268	-0.0145233	-0.0189717	0.040077	-0.0134614	-0.00967261	0
34.4	-0.0300786	-0.00329326	0.00528473	0.00487447	0.00491949	0.00844514	-0.0253207	-0.0240598	-0.0670158	0.0343377	0
34.6	-0.00924546	-0.0201806	-0.0486372	-0.0653109	0.0221627	0.0259403	-0.0114765	-0.0311159	0.00282338	0.0101283	0
34.8	0.00256757	0.0344601	-0.0532103	-0.0416337	0.00651108	-0.0352315	-0.0221229	-0.0277357	0.0160147	-0.050254	0
35	-0.0056849	-0.00640779	-0.0042927	0.0167858	-0.000285616	-0.0103979	-0.0105744	-0.00235382	-0.0109259	-0.0165096	0
35.2	0.0289645	-0.0329887	0.00311504	0.00547002	0.00344225	0.0309678	0.0150333	-0.0141757	0.0195963	0.00487606	0
35.4	0.0370048	0.0301854	0.00708056	-0.0256035	0.0129256	0.00566097	0.012883	-0.0467825	0.0523666	-0.0237562	0
35.6	-0.0108285	0.0543046	0.0263291	-0.0311696	0.0210015	-0.00386212	0.0132501	-0.0187529	0.0147171	-0.0120197	0
35.8	0.0177768	0.0102975	-0.0200269	-0.0339995	0.00514893	0.0243422	0.0394033	0.0200494	-0.0194475	0.0157868	0
36	0.0298469	-0.0180804	0.022669	0.0535797	0.00244722	0.00123423	-0.00984288	-0.016532	-0.0273123	0.0178513	0
36.2	0.0151466	0.00945545	0.0300117	0.0865077	-0.0335139	0.00954627	-0.00540099	0.0056327	-0.0248754	0.0217707	0
36.4	0.00142655	0.00995958	0.0591009	0.032889	-0.0461593	0.00228696	-0.0136002	0.00555098	0.00621674	-0.00103056	0
36.6	-0.00192471	0.0252499	0.0745657	0.0175224	-0.0343636	-0.0205623	-0.00786367	-0.00922665	0.0152534	0.00341734	0
36.8	-0.0172898	0.0398378	0.0263672	0.0194369	-0.0113421	-0.00475851	0.01663	0.00623385	-0.00122549	0.0257505	0
37	-0.0345979	-0.0232125	-0.0197081	-0.0183038	0.0206267	0.00757966	0.00481096	0.00730259	-0.00643594	0.00895222	0
37.2	-0.00704318	-0.0499462	-0.0451755	0.0264033	0.0157453	-0.0405888	0.0321386	0.00136609	-0.0323519	0.0222558	0
37.4	-0.000223024	-0.0164539	-0.0607013	-0.000522281	0.0281538	-0.00600005	0.0288099	0.0147794	0.000965867	0.0136008	0
37.6	0.00806875	-0.0259953	-0.0369166	0.00355128	-0.0143018	0.022037	0.019296	-0.0148843	-0.00165027	-0.00660308	0
37.8	0.0330105	-0.00215839	-0.00843436	-0.00116039	-0.0237983	-0.0102513	0.0157176	-0.0147094	0.0239739	-0.0319719	0
38	0.0141687	0.0197518	-0.0199621	-0.00916859	-0.000230868	-0.0347641	-0.0374989	-0.0104723	0.0189877	-0.0274335	0
38.2	-0.029606	-0.0433328	-0.0342076	0.0153488	0.00275815	-0.0224246	-0.0805737	-0.0349056	-0.0443479	-0.00738059	0
38.4	-0.00959576	-0.070693	-0.00265415	0.014403	0.0111071	-0.0108299	-0.0138003	-0.0100397	-0.027595	-0.0177541	0
38.6	0.00343513	0.0193145	0.0150128	0.0125812	-0.0129055	0.0264315	0.00805624	0.0142616	0.00294271	-0.000205827	0
38.8	-0.00663279	4.6872e-05	0.0148538	0.0257454	-0.00394113	0.0385586	-0.0147563	0.0108636	0.0482561	-0.0287638	0
39	0.00365245	0.0187009	0.0211567	-0.0153178	0.00025381	0.0148441	-0.00613254	-0.0441603	0.0292662	-0.0220349	0
39.2	-0.0207048	0.0363626	0.0422829	-0.0388929	-0.0030075	-0.0113973	-0.00426996	-0.0280537	0.016965	-0.00805371	0
39.4	-0.0376823	0.00453772	0.0366614	-0.0281798	0.000106931	0.00137324	-0.00441136	0.0458462	0.0335992	-0.00226375	0
39.6	0.0129628	0.0023753	0.0096292	-0.00718476	0.00341563	0.0382107	0.0256108	0.0494378	0.00886075	0.0238978	0
39.8	0.0139626	0.00180879	0.0173772	0.0553979	-0.000674482	0.0285198	0.0115344	0.0242293	-0.0124426	0.0193515	0
40	-0.0361691	-0.01511	-0.0260849	-0.000300238	-0.0352321	-0.0202693	-0.0269231	0.0268133	0.0152498	0.00819109	0
40.2	-0.0181941	0.00607543	-0.0770146	-0.0442602	-0.00917274	-0.0148495	0.0328592	0.0149741	-0.0225485	0.0233742	0
40.4	0.00483136	0.00529042	-0.0531714	-0.0147375	0.0282868	-0.009373	0.0426476	0.0101337	-0.033346	0.0201827	0
40.6	0.0158018	-0.0150342	0.00572993	0.00548933	0.0101649	-0.0181851	0.00942928	0.0101195	-0.0249005	-0.000271944	0
40.8	0.0283579	-0.00374973	-0.0107647	0.00447946	-0.0145411	-0.0246007	0.000510747	-0.00600262	-0.0264491	-0.00420508	0
41	0.00644765	0.011721	-0.0426258	0.0180709	0.010344	-0.0163611	-0.0245139	-0.0326384	-0.00419475	-0.00155893	0
41.2	-0.0168741	-0.0033699	0.0533939	-0.0211305	0.0150014	0.049809	-0.0161286	-0.0427318	-0.00987011	-0.0075162	0
41.4	0.00960472	0.031701	0.000300346	-0.0201343	-0.0232915	0.0569456	0.0249353	0.0277854	0.045335	0.0082313	0
41.6	0.0100962	0.0363249	0.0409474	0.0424497	0.0012237	0.0234093	0.0450936	0.0263476	0.02415	0.00100552	0
41.8	0.0121711	0.0159027	0.0470243	0.0542323	0.00900375	-0.0274226	0.0117643	0.00442932	-0.00380256	-0.0180294	0
42	-0.00218865	0.0206927	0.0294755	-0.00802739	-0.00280758	-0.0363095	-0.0319695	-0.0027248	0.00291566	-0.0236545	0
42.2	-0.0244112	0.00140375	0.0635493	-0.0274587	0.0154704	-0.013361	-0.0268646	-0.0170007	0.00981831	-0.00374439	0
42.4	0.0120783	-0.0493835	-0.00579437	0.0193128	0.00637205	-0.0356454	-0.00626829	-0.0101409	0.0254573	0.0204504	0
42.6	-0.0093975	0.0214104	-0.0146642	-0.00635363	-0.000612286	-0.0209649	-0.0444773	-0.027767	-0.0158406	-0.0220569	0
42.8	-0.00260985	-0.00524332	-0.0482632	0.0191392	-0.0065621	-0.0195704	-0.0216207	0.0274061	0.00660045	-0.023735	0
43	-0.00685964	0.00613786	-0.0448499	-0.0123822	0.00916805	0.0113547	0.0125333	-0.028137	0.00495662	-0.0136342	0
43.2	-0.00560826	0.0268059	0.00358526	-0.0220334	0.0102468	0.0384934	0.0362729	-0.0158556	-0.041464	0.0116726	0
43.4	0.00314659	-0.0366407	-0.00252483	-0.000394129	-0.0180833	0.0171423	0.0331033	0.0659104	-0.0512064	0.0334012	0
43.6	-0.0134339	-0.058511	-0.0333939	-0.0163358	-0.0153559	-0.00502002	-0.00979937	0.0141929	-0.0176914	0.0138416	0
43.8	-0.00652802	0.0355492	0.0330053	0.0447567	0.0273272	0.0180741	-0.0232831	9.41935e-05	-0.00335774	0.00642076	0
44	0.0229609	0.0193938	0.0259059	0.0473148	0.00166981	0.0376927	-0.0203333	0.00837257	0.018779	0.0083299	0
44.2	0.0262059	0.00679687	0.0157743	-0.00918322	-0.00540935	0.00500701	-0.0253473	0.0252657	0.0363765	-0.00646138	0
44.4	0.00802478	0.0213542	0.0510068	-0.0459291	0.0200565	0.00680629	0.00773688	0.019371	0.0321022	0.0211752	0
44.6	-0.00780395	-0.0111761	-0.00418874	-0.0106478	0.00563037	0.00498961	0.0371478	-0.0100369	0.0139217	-0.000901954	0
44.8	-0.00405225	-0.0406715	-0.0611438	-0.0106238	-0.0344358	-0.00845516	0.000406855	-0.0234645	-0.00417538	-0.0494504	0
45	0.00888015	0.00728218	0.0298538	-0.0811773	-0.0253974	0.0233384	-0.0390727	-0.0106024	-0.00512704	0.0128334	0
45.2	0.00498991	0.0101872	-0.0199715	0.00101287	0.00209784	-0.010292	-0.00671928	-0.00346414	0.0246631	0.019646	0
45.4	0.0463272	-0.0321519	-0.0332757	0.018656	0.0345191	0.00466896	-0.000485372	0.0217868	0.0266386	-0.0085435	0
45.6	0.0195743	-0.0246177	0.00428708	-0.0078667	0.0122302	-0.0384513	0.041793	-0.021284	0.0270838	-0.020984	0
45.8	-0.0166482	-0.0122831	0.00910991	-0.000642322	-0.0105897	-0.01722	0.0846338	-0.0532973	0.00607304	-0.00989261	0
46	-0.0133256	-0.0293487	-0.00919057	0.0442436	0.00906409	0.0109312	0.0478809	-0.0140455	-0.0210533	0.0139556	0
46.2	-0.00128365	-0.00836073	0.00349256	0.0680105	0.00980664	-0.0484158	0.00589818	0.00820102	-0.0212376	0.013118	0
46.4	0.0257049	0.0454634	0.0281814	0.0229309	-0.0285344	-0.0145934	0.0262218	-0.0259346	-0.0139158	-0.0229299	0
46.6	0.014367	0.00652555	0.0276654	-0.0248795	-0.00131579	0.0213484	-0.0572685	-0.00138583	0.00550658	0.00336121	0
46.8	-0.0231207	-0.00956491	0.0212844	-0.00863008	0.0133588	0.0129945	-0.0183421	0.0579242	-0.0307885	0.0351904	0
47	0.0106482	0.00817396	-0.0226775	-0.0223151	-0.00765794	0.040362	-0.000661247	0.0336559	0.00531079	0.0246333	0
47.2	0.00556632	0.036085	-0.0309816	-0.0283313	-0.00912173	0.0228208	-0.0258875	-0.0310455	0.00683008	0.0131971	0
47.4	-0.0116239	0.0565477	0.0128876	-0.0208662	0.0103125	-0.020031	-0.00588744	0.000163019	-0.0272578	0.013661	0
47.6	0.0414558	0.0382784	0.0111895	-0.0298562	0.0130833	0.00612452	0.0108376	0.0815415	0.0195027	-0.0100657	0
47.8	-0.0143346	-0.00198916	-0.0214456	0.0386967	0.011478	-0.00906267	-0.0154392	0.0367936	-0.0133267	-0.0334205	0
48	-0.00248342	0.0148043	0.0115529	0.0412688	-0.00985773	0.0108187	-0.0127339	-0.011664	-0.0397498	-0.0171551	0
48.2	-0.0226082	-0.00128708	0.0129528	-0.00135817	0.0177777	-0.0104449	0.00386813	-0.001558	0.00980979	-2.96868e-05	0
48.4	-0.0226719	-0.0275136	-0.00852534	-0.022789	-0.00997582	-0.0220774	-0.0308574	0.00959455	0.0433058	0.00757812	0
48.6	0.0068414	-0.0252026	-0.00732581	0.0237512	-0.0136304	-0.00401657	-0.0210731	-0.00199629	0.0171229	-0.0138809	0
48.8	0.00023358	0.0203697	-0.00552774	0.0447216	0.0377092	0.0192912	0.0384178	-0.0127667	-0.00211595	-0.0332202	0
49	-0.0157305	0.0685334	-0.00704649	-0.0256097	-0.00214755	0.0231945	0.0172155	-0.0126503	0.0109753	-0.0023714	0
49.2	-0.00441787	-0.0150931	0.0342066	0.000520271	-0.00851952	-0.0506541	0.018932	0.00486672	-0.00718817	0.00754114	0
49.4	-0.00354279	-0.0818211	0.0122846	-0.0281111	-0.00824466	-0.00524144	0.00308741	0.0145306	-0.0247366	0.0338111	0
49.6	-0.0327496	-0.0116069	-0.00597807	-0.00851929	-0.00639422	0.0469266	-0.0164887	-0.0117782	0.00228629	0.0233268	0
49.8	-0.00553593	0.0359565	0.00253387	0.00339987	-0.00577834	0.0141385	0.0151046	-0.0350571	0.0150119	0.0080416	0
50	0.0242444	-0.00916275	-0.00715698	0.00599227	-0.00944032	-0.012489	0.0211102	-0.0163093	0.00103482	0.0131041	0
50.2	-0.0131202	-0.0503554	-0.0110801	0.0243097	-0.00663439	-0.00158737	-0.0194539	-0.0191831	-0.0217386	-0.000614417	0
50.4	-0.0156322	-0.0570799	0.01352	-0.0324067	-0.00340731	-0.0354925	0.0014966	-0.0679574	-0.048999	-0.0202756	0
50.6	-0.0254126	-0.00728288	-0.0503775	0.011018	-0.0260788	-0.0200006	-0.0494082	0.00964999	0.0332895	0.00128165	0
50.8	0.00669471	-0.0182621	-0.022548	0.018261	-0.0120182	-0.0327496	-0.0217293	-0.0282544	0.017685	-0.0192127	0
51	0.00992114	-0.06487	-0.0185532	0.00273246	-0.0170437	-0.00910833	-0.0209248	-0.0265571	-0.0213724	0.00254703	0
51.2	0.00646711	-0.0198114	-0.0421998	-0.0303217	-0.0240607	0.0354587	-0.0304822	0.0442347	-0.00277934	0.0141957	0
51.4	0.0063927	0.02147	-0.00744154	-0.0444362	0.00308028	0.0224406	0.00479708	0.0380167	0.0141924	-0.00812678	0
51.6	-0.0161588	-0.0315489	0.0211606	0.00217465	0.0120919	-0.0115701	0.0210315	-0.0214761	0.000185469	0.0118804	0
51.8	0.0133443	0.0376094	0.00137259	0.00405138	-0.011335	0.00979978	0.0293655	-0.0185361	0.0036921	-0.000938127	0
52	-0.010072	0.0456398	0.0489567	0.0127927	0.00892947	0.0191678	0.0161943	0.00216922	-0.000253292	-0.0210903	0
52.2	-0.0307565	0.0195116	0.022656	0.0228902	0.00334548	0.00645664	0.0224474	0.0321362	-0.00259262	-0.0190302	0
52.4	-0.0300829	0.0204945	-0.0589229	-0.0140502	-0.00536674	-0.00275459	0.0113873	0.0147691	-0.0126258	0.0283149	0
52.6	0.00366869	0.0315451	-0.0491068	-0.0400755	0.0240495	-0.025017	-0.0212271	0.00926688	-0.0328693	0.0255918	0
52.8	0.0286736	0.0081786	0.0446347	-0.00131966	0.0403772	-0.024905	-0.0195359	0.0248917	-0.0231933	-0.0342079	0
53	-0.0114695	-0.0323149	0.0551099	0.0093474	-0.000430866	0.028459	0.0110405	-0.0364046	0.0150574	-0.018425	0
53.2	-0.0112532	-0.0117678	-0.0393323	-0.0498578	-0.0190147	-0.00643241	-0.00800704	-0.0481559	-0.00482511	0.00368143	0
53.4	-0.0303733	0.0230278	-0.0453984	0.0224778	0.0102121	-0.0198106	-0.0477064	-0.00631445	0.00835212	0.00537368	0
53.6	-0.0131495	0.0105664	0.0105474	0.0853002	0.00463881	-0.0242373	-0.00437089	-0.0214646	0.017764	0.000678347	0
53.8	0.0451308	-0.0184338	0.048021	0.0378395	-0.0048763	0.0068198	0.002275	-0.0161681	0.0154428	-0.00184901	0
54	0.0409483	-0.00557871	0.0493472	-0.0160071	-0.00121088	0.0162025	-0.0188287	0.0220081	0.0172879	-0.0185241	0
54.2	-0.0125828	0.0108137	0.00437868	-0.0113592	-0.00911499	-0.00827621	0.0218369	0.0154437	0.0076181	-0.024892	0
54.4	0.0222589	-0.0348463	-0.0657975	-0.0100308	0.00115701	0.0473244	0.0107264	0.0245315	-0.00998394	0.0145271	0
54.6	0.0292509	-0.0350592	-0.0234242	0.0185459	-0.0164224	-0.0235491	0.02633	0.022961	-0.011608	-0.00447589	0
54.8	-0.0082681	-0.00203013	0.0444279	-0.0560871	0.00215057	-0.00941362	-0.0192549	-0.0432915	-0.0165532	-0.00863985	0
55	0.00214054	0.0242346	6.31872e-05	-0.0530047	-0.00788866	0.0242059	-0.0449215	0.00562431	0.00876077	0.005805	0
55.2	0.00984783	0.034181	-0.0202352	0.0059626	-0.0146307	0.0183959	0.0115195	0.0527372	0.0199	0.0328754	0
55.4	0.00409204	0.0144412	0.0406553	0.0123096	0.00339936	0.00598758	0.0520143	-0.0036277	0.00250351	0.0230632	0
55.6	0.0318692	-0.037184	0.035573	0.0345882	-0.00634884	-0.00603028	0.023165	-0.00828071	-0.000493662	-0.0217239	0
55.8	-0.0160633	-0.0327358	0.0147637	0.0460611	0.021286	0.0139801	0.0269619	-0.00283118	-0.0255514	0.0331964	0
56	-0.0057213	0.100557	-0.015879	-0.00531805	0.0318917	-0.0119983	-0.00892791	-0.0119829	0.00350943	0.00176065	0
56.2	-0.0127433	0.0464003	-0.0720019	-0.0178843	-0.0166766	-0.0448372	-0.00764344	-0.0342262	0.0012518	0.000645039	0
56.4	0.00749803	-0.0228316	-0.0600374	-0.0235077	-0.0045553	-0.00082677	-0.0103832	0.0123699	0.0171547	-0.00544566	0
56.6	0.0181761	-0.0105066	0.0447013	-0.024464	0.0379912	0.012426	-0.00977551	0.0187858	0.0138866	-0.0202294	0
56.8	-0.0238775	-0.0288901	0.0804938	0.0134973	0.0138504	-0.00880195	0.0224936	-0.03511	-0.0124598	0.00154434	0
57	-0.0035241	-0.0101413	-0.00977856	0.0157742	-0.00864569	0.0637271	0.0210425	0.0348575	0.0502677	-0.00508217	0
57.2	0.0294463	0.016195	0.031968	-0.0270366	-0.0136127	-0.00855168	0.0211367	0.0498289	0.0279409	-0.00912498	0
57.4	-0.00112329	-0.0153792	0.0413926	0.0464919	-0.00651667	0.0064215	-0.0029028	0.0384124	-0.00134802	0.00682858	0
57.6	-0.0140204	-0.00607215	0.019483	0.0457088	0.0119719	0.00618559	0.0234017	0.0148291	-0.00148279	0.0246937	0
57.8	0.0130881	0.0095711	0.0319435	-0.000406161	0.0167846	0.00647259	0.0123322	0.0397547	-0.0132667	0.0201954	0
58	0.0288753	-0.0179301	0.0482982	-0.0186354	0.0250935	0.038541	-0.00688963	0.0498578	-0.0118941	0.00468456	0
58.2	0.0260231	0.00140096	0.0381426	-0.00867037	0.0376522	0.0315477	0.0446235	0.00989248	0.0417681	0.00155286	0
58.4	0.0347461	0.0768379	0.0566131	0.0986586	0.00489598	0.0270633	0.0201577	0.0694951	0.0660908	-0.00725471	0
58.6	0.0308149	0.0304083	0.0904985	0.0621785	0.0314733	-0.000120005	0.04312	0.0577672	0.0157272	-0.0338488	0
58.8	-0.00269184	0.0580027	0.0715855	0.0520844	0.034608	0.0168333	0.0556754	0.10004	0.0023652	0.00347026	0
59	0.0172268	0.0437493	0.0730831	0.0649277	0.0267614	0.0462476	0.0328397	0.0263549	-0.0273629	0.0261773	0
59.2	0.0310532	0.0371892	0.0508443	0.0339652	0.0504904	0.0292469	0.016479	0.00486782	-0.0113433	0.0318149	0
59.4	0.0208181	0.0683022	0.0106957	0.0399858	0.0565218	-0.00125113	0.0332714	0.0646514	0.0624553	0.0472762	0
59.6	0.047061	0.00542082	0.0656493	0.0883275	0.0168982	0.00133728	0.0493441	-0.03335	0.0430898	0.0267016	0
59.8	-0.00680448	0.0277202	0.0755105	0.0151306	0.0245846	-0.0108541	0.0320742	0.0590721	0.0105616	0.0168053	0
60	0.0446742	0.0218742	-0.0072382	0.0691874	0.0398171	0.00431866	0.0914373	0.128701	0.0923143	0.0390423	1
60.2	0.122848	0.121946	0.0953058	0.113929	0.0832335	0.104889	0.216983	0.178567	0.148773	0.0599639	1
60.4	0.15557	0.188444	0.155446	0.1863	0.102743	0.141579	0.25584	0.153996	0.130172	0.0755381	1
60.6	0.137411	0.150796	0.119538	0.22147	0.0773492	0.0996637	0.191206	0.0902792	0.119614	0.0847917	1
60.8	0.116921	0.106193	0.149657	0.138928	0.0716438	0.0797169	0.152866	0.112148	0.128786	0.0628294	1
61	0.128358	0.0667572	0.0997059	0.0948026	0.0859884	0.0499656	0.170556	0.145647	0.103984	0.0247659	1
61.2	0.059686	0.123927	0.0323402	0.0139281	0.0264994	0.0472785	0.157059	0.0626766	0.101547	0.0480973	1
61.4	0.0815513	0.138247	0.0454993	0.092763	-0.00376123	0.0461512	0.136444	0.0720253	0.0420406	0.0716832	1
61.6	0.0901769	0.118945	0.0226666	0.0815438	0.0282985	0.0307006	0.154316	0.0967768	0.0523737	0.0219799	1
61.8	0.0483202	0.052155	-0.011626	0.0107379	-0.0103293	-0.00402051	0.126023	0.0646489	0.0646277	-0.0104299	1
62	0.0270849	0.00840032	0.0112692	0.0166643	-0.0619938	-0.0284515	0.0595038	0.0339747	0.0251171	0.00994363	1
62.2	0.0241431	0.0574874	0.0334495	0.0337093	-0.00940715	-0.0176377	0.0746336	0.0300068	0.024834	-0.00809865	1
62.4	0.0142777	0.0435906	0.0285478	0.0629618	-0.0226663	-0.012633	0.0999244	0.0265036	0.0102719	-0.0338452	1
62.6	0.0122434	0.0245718	0.038537	0.0268918	-0.0165367	-0.0273565	0.00510797	0.0500678	-0.00819925	0.0181034	1
62.8	-0.0372355	0.0603336	0.0424534	0.0137376	-0.0300405	-0.0414564	0.0185978	-0.0118197	0.0195193	-0.0151225	1
63	-0.0380677	0.0503697	0.038219	0.0474682	-0.0246063	-0.0559385	0.0371072	-0.0491711	0.00869508	-0.0464809	0
63.2	0.00420206	0.0226055	0.0189012	0.0648291	-0.0142468	-0.0509253	0.0481916	-0.0435419	-0.0363049	-0.0240286	0
63.4	0.00149682	0.00917796	-0.0310153	0.0244817	-0.0212502	-0.033731	0.0735533	-0.0222936	-0.0260338	-0.0241927	0
63.6	-0.0199155	-0.04287	-0.0652737	-0.0025607	-0.0196344	-0.0397258	0.0293234	0.0211085	0.00220402	-0.0385729	0
63.8	-0.00941196	0.00134477	-0.00587308	0.0548237	-0.059624	-0.0338	0.0753251	-0.0646339	-0.0466918	-0.0269032	0
64	0.0309089	0.0662819	0.0357364	-0.0383688	-0.0255091	-0.0358082	-0.00159641	-0.0250323	-0.0451686	-0.045255	0
64.2	0.0592855	0.0289678	-0.0041307	-0.0309686	0.000895238	-0.0173842	-0.044432	0.0253189	-0.00920627	-0.0244355	0
64.4	0.0388563	-0.0036085	-0.0425063	0.00130449	-0.0280326	-0.0184464	-0.00762929	0.0201167	0.00498339	-0.0116025	0
64.6	-0.00306343	0.0124966	-0.0307309	-0.0215448	-0.0457659	-0.0379227	0.0339257	-0.0261177	-0.0187348	-0.0257077	0
64.8	-0.0252828	0.0195807	-0.0235949	-0.0147919	-0.0298748	-0.0338946	0.0292104	-0.0275141	-0.0340746	-0.0264444	0
65	-0.0224986	0.0306723	-0.0342997	-0.044351	-0.0374878	-0.0269742	-0.0382103	0.0698551	0.00150826	-0.0422061	0
65.2	0.0280469	-0.0422386	0.00504657	-0.0360595	-0.0411109	-0.00495475	-0.0386818	-0.0577903	-0.00919429	-0.033364	0
65.4	0.0164578	-0.0372707	0.0190748	-0.0556378	-0.0614646	0.00737033	-0.0267174	-0.115864	-0.0374947	-0.032311	0
65.6	-0.0405123	-0.0158131	-0.077812	-0.0286231	-0.038609	-0.00677959	-0.0229641	-0.0367146	0.000447281	-0.000300688	0
65.8	-0.0631527	-0.0223039	-0.0766236	0.0215449	0.000792169	-0.00709209	-0.0247536	0.0135394	0.0359925	0.0305446	0
66	-0.0314892	-0.0214593	0.0238831	0.00187293	0.0101597	0.0110344	-0.0250822	0.00356857	-0.019452	0.0158231	0
66.2	-0.00283545	-0.0172846	0.0041288	-0.0395025	0.0118946	-0.0033647	-0.011288	-0.0123158	-0.0845032	-0.0155307	0
66.4	-0.0204911	-0.020523	0.0151266	0.00134536	-0.00219584	-0.0290727	-0.00314787	-0.0634379	-0.0427341	-0.0354442	0
66.6	-0.00618104	-0.0308874	0.0114772	0.0308736	-0.0286987	0.00534396	-0.0169652	0.027492	0.0114744	-0.0101577	0
66.8	0.0158674	-0.00990153	-0.0417189	-0.0179794	-0.00830443	0.0182274	0.0303637	0.0192058	0.0184204	-0.0209636	0
67	-0.0167154	0.0041685	-0.0133535	-0.013787	0.00441202	0.000396842	0.0335623	-0.00326169	-0.00678274	-0.0245207	0
67.2	-0.00942333	0.0467578	0.044065	0.0106201	-0.0187244	-0.0256253	-0.0105146	0.0147227	-0.00479668	-0.00924318	0
67.4	0.042566	0.0665578	0.012542	-0.016162	-0.0304909	-0.0223493	-0.0121183	-0.00490681	0.00148319	-0.012609	0
67.6	-0.00728945	-0.0278898	-0.0219984	-0.0103238	-0.0151394	0.00465908	-0.00554577	-0.0161585	-0.03281	-0.0116001	0
67.8	-0.0267842	0.00349116	-0.0225121	-0.0364248	0.00167822	-0.0646638	-0.0145979	-0.0322326	-0.000997048	-0.0065902	0
68	-0.003628	-0.00692292	-0.0307464	-0.0120006	0.00347993	-0.0222828	-0.0599188	-0.029573	-0.0308399	0.00707238	0
68.2	0.0187532	-0.000596173	-0.0173241	0.0356163	0.00905645	-0.00274038	-0.0612556	0.000288764	-0.0253115	0.0064489	0
68.4	0.0190275	-0.0115953	0.000980103	0.0163776	0.000363662	0.0011866	-0.0146395	-0.00453273	0.0100426	-0.0140056	0
68.6	0.0102688	-0.0429381	-0.00491512	-0.0228729	-0.0157426	0.0142845	0.0204061	-0.0117709	-0.00134753	-0.0225557	0
68.8	-0.000836228	-0.0166608	0.00236531	-0.000252301	-0.0100628	-0.0148593	0.0309043	0.010971	-0.0272792	-0.00569884	0
69	-0.0202997	0.00186552	0.0290156	0.000690364	-0.00504085	-0.0098005	0.0328936	-0.024553	-0.0109027	0.00464182	0
69.2	-0.0125046	-0.00533109	-0.0248698	-0.0456575	-0.00225133	-0.00634537	-0.00144144	-0.00415509	0.0146517	0.00290368	0
69.4	-0.00328675	0.00282043	0.0272128	0.030019	0.0274572	-0.0168449	-0.0125837	0.0469718	0.0274274	-0.0257878	0
69.6	6.28225e-05	-0.0174395	0.0461848	0.0201705	0.004069	-0.00762602	0.0293787	0.0247041	0.00161431	0.00818635	0
69.8	-0.00423399	-0.0269411	-0.00963797	-0.0435177	-0.013388	0.0135574	0.00891133	-0.00776726	-0.00671524	0.026668	0
70	0.00140778	0.00190743	-0.0383667	-0.00638928	0.0135389	0.0189763	-0.041108	0.00952906	0.00282268	0.00123647	0
70.2	0.0199964	0.0075103	-0.0553578	0.0222591	0.0107066	0.0112319	0.00292436	0.00221272	-0.00800193	0.0315467	0
70.4	-0.00290409	0.00654593	-0.0705276	-0.00573769	0.0266882	0.00803005	-0.0142582	-0.0108996	0.0517017	0.0208025	0
70.6	-0.0207524	0.00431526	-0.0118252	0.0351752	-0.000561174	0.0386948	-0.0120876	0.0329138	0.0646446	0.0140816	0
70.8	-0.0252441	-0.00654653	-0.006684	0.0472778	-0.00380466	0.0208495	-0.00580008	-0.02287	-0.0056676	0.00962292	0
71	-0.00861035	0.00868637	0.0535558	0.00641575	-0.000900812	-0.0230014	0.0150612	-0.00923539	-0.0387493	0.0125016	0
71.2	-0.00766746	0.0177805	0.0750449	-0.0392709	-0.00771253	-0.014257	0.0387452	0.0268928	-0.0120299	0.0155805	0
71.4	-0.0370029	-0.00506999	-0.0135942	-0.054154	0.00726394	0.00373763	0.0222582	-0.0336145	-0.00793366	0.00533491	0
71.6	-0.0217646	0.000179914	0.0243489	-0.010393	0.025551	-0.0408451	0.00595753	0.00477121	-0.0194245	-0.00461595	0
71.8	0.0347165	0.00670403	0.0199271	0.0528944	0.0152109	-0.0224294	0.0435578	0.0161639	0.0028148	-0.00995066	0
72	-0.00736739	-0.00343515	0.00645227	0.0259543	8.72459e-05	0.0112569	-0.0433849	-0.0439879	0.00513635	-0.00242419	0
72.2	-0.000160059	-0.0553783	0.0333639	-0.00281161	-0.0065236	0.00599126	-0.0143923	-0.0337884	-0.0191497	0.00894119	0
72.4	0.0378001	-0.0287737	-0.00292318	-0.0284327	-0.0157771	0.0278298	0.0279835	0.0167665	-0.00216177	-0.00366138	0
72.6	0.0173092	0.0237286	-0.0585762	-0.054349	-0.00632363	0.0486026	-0.0247232	0.0247656	0.0121353	-0.0127775	0
72.8	-0.00711982	-0.00458023	-0.0167059	-0.0192342	0.0180569	0.0072096	-0.0243733	0.00789145	-0.0255558	0.00346617	0
73	-0.00340816	0.0346113	-0.000247648	0.0221778	0.00324017	0.0137526	-0.0262183	-0.0119275	0.00290939	-0.00738319	0
73.2	-0.00136007	-0.0134965	0.000378366	-0.0132371	0.03028	0.0171607	-0.0329286	0.0153429	0.0300802	0.0070032	0
73.4	0.00059981	0.00271824	-0.0536926	0.0111896	0.0142498	-0.00902455	0.0277804	-0.0253427	0.0298005	0.0244986	0
73.6	0.0263777	0.0362371	-0.0228472	0.0148976	-0.00257535	0.00347124	0.0381436	0.0250385	0.0231491	0.0289448	0
73.8	0.0381225	0.0176573	0.0413874	-0.00324703	0.0157923	0.00491753	-0.000270294	0.0770092	0.0210486	-0.00761336	0
74	0.0279456	-0.0086048	0.0305139	0.0225258	0.0133412	-0.0223773	0.00194138	0.00315295	0.016621	-0.0462279	0
74.2	0.030475	-0.000998641	0.0109974	0.0218155	-0.0176368	0.00873736	0.0184914	-0.0462841	-0.000434536	-0.0143701	0
74.4	-0.00296261	0.0367063	-0.01592	-0.0206508	-0.00835848	0.0268777	0.022195	-0.0596149	-0.0273941	0.0151442	0
74.6	-0.0105413	0.03699	0.0125445	0.00269325	-0.0227954	0.0340674	-4.74001e-05	0.0382373	-0.0164236	0.0113948	0
74.8	-0.00272853	0.0423546	0.00181733	0.0413243	-0.0151873	0.0139429	0.0173815	0.0366623	-0.0151694	-0.022726	0
75	0.00679161	0.0213548	0.00540967	0.014158	0.00995515	-0.0257984	0.00764433	0.00892471	-0.022269	-0.00936068	0
75.2	0.0143126	-0.00348234	0.0339332	-0.00249436	0.0125604	-0.0346365	-0.0353524	0.0291955	-0.0115376	0.00638753	0
75.4	0.00191369	-0.00885897	0.018131	0.0199514	-0.0135538	-0.00635098	-0.00791605	0.01516	0.00801033	-0.010043	0
75.6	-0.0287341	-0.0468202	-0.00645079	-0.036239	-0.0308588	0.00524412	0.0535857	-0.0289112	0.0218243	0.03186	0
75.8	-0.0302027	-0.0161433	-0.024614	-0.0471862	0.0206853	0.0169363	-0.000345677	-0.0827731	0.0334674	0.00699453	0
76	-0.0190286	-0.0791297	0.0162404	0.00483575	0.0258926	0.0170219	-0.0136369	0.00850924	0.0447219	0.0137101	0
76.2	-0.00516434	-0.0555888	0.0173612	0.00238749	0.00297944	-0.0266779	0.0241656	0.00992137	0.0136101	-0.00679419	0
76.4	0.0228963	0.000879089	-0.0186147	0.0182279	-0.00140164	-0.00147946	0.0296529	-0.0283956	-0.0165515	-0.0135092	0
76.6	0.0114489	0.0105226	0.00776672	0.0288673	0.0100065	0.0415624	-0.0239517	0.0127706	0.00350732	0.000875058	0
76.8	-0.036502	0.0517593	0.044754	-0.0506412	0.000689327	-0.0241863	-0.0550842	0.0249951	0.00626899	-0.0179342	0
77	0.0112767	0.0273894	-0.041065	-0.0270141	-0.0456416	-0.0141537	0.00682065	0.0236834	-0.0530605	0.0178721	0
77.2	0.0112807	0.036581	-0.0610348	-0.0157923	-0.0273594	0.0237446	-0.00412601	0.0206368	-0.0115291	-0.0181794	0
77.4	-0.00108882	0.0322435	-0.0466433	0.0482462	-0.025044	0.0302469	0.0104261	0.0325296	0.0157961	-0.0191283	0
77.6	-0.00301129	0.00180522	-0.0207433	0.0354634	0.00731463	-0.0190939	0.0264704	0.0260765	-0.0107689	-0.00820215	0
77.8	-0.0118683	-0.0100474	-0.0106345	0.0202488	0.0317496	-0.0291234	0.0211782	-0.0243707	-0.00864502	-0.00763812	0
78	-0.013262	0.0133512	-0.00441212	0.0718825	-0.00667938	0.00729864	0.0017525	-0.0436215	0.0453209	0.0195593	0
78.2	6.24633e-05	0.031978	0.0444053	0.0264294	-0.00278266	-0.0164668	-0.0421453	0.0165372	0.0572351	0.0402095	0
78.4	-0.0145061	0.00560616	0.0487647	0.00572553	0.0465295	-0.00977489	-0.0241643	0.0154868	-0.0175924	0.0108271	0
78.6	0.00412651	-0.0208652	0.0399827	-0.0181388	0.00602877	-0.0323058	-0.0370843	0.00703589	-0.0184094	-0.019681	0
78.8	0.0137756	-0.042849	0.0429334	-0.0314648	-0.00294787	0.0180397	-0.0199218	-0.0215209	0.0245704	0.00969053	0
79	0.00446092	-0.0332999	0.00508529	-0.0260254	-0.00846413	0.0144846	0.0405126	-0.0270745	0.022735	0.032875	0
79.2	-0.0159185	-0.00955493	-0.0126844	-0.0139397	-0.0270982	-0.0267651	0.0393424	0.00376623	-0.0192988	0.0125465	0
79.4	-0.0192434	-0.0147441	0.0461575	-0.0285915	-0.00664325	0.0115483	-0.00710891	0.00816104	-0.0386323	-0.00675725	0
79.6	0.0270381	-0.00860938	0.0563995	-0.0633375	-0.00816591	-0.00990962	0.0197114	-0.0160245	-0.030041	-0.0185807	0
79.8	0.00590619	0.0392551	0.0253942	0.0124226	0.00905654	0.000951227	-0.0404146	-0.00603996	-0.0502641	-0.0181701	0
80	-0.00143751	0.0264033	-0.0706684	0.0357915	-0.00788601	0.0102987	-0.0357148	0.0115735	-0.0289537	-0.00271569	0
80.2	0.023627	-0.00431846	-0.0446914	-0.00468092	0.00185364	0.0171523	-0.00342826	-0.0107277	-0.0118983	-0.0113074	0
80.4	0.0496428	-0.0292219	-0.00402478	-0.0272606	0.0168466	-0.00667749	0.0207723	-0.0424585	0.0143724	-0.0209094	0
80.6	0.0369468	-0.00891191	-0.0310171	-0.00587028	-0.00435285	0.00604652	0.0411584	-0.00931555	0.0315034	-0.0115466	0
80.8	0.00125775	0.0705032	-0.00664369	0.0208262	-0.0130273	0.0684907	0.0196753	0.0476815	-0.00389638	-0.000483265	0
81	0.0203033	0.039188	-0.0339286	0.00871559	-0.00692264	-0.0315269	-0.021388	0.0088407	0.0247429	0.0299557	0
81.2	-0.00833064	-0.0523008	0.0322431	-0.00171418	-0.011288	-0.0352039	-0.0460436	0.0221219	0.0248756	0.0179958	0
81.4	-0.0125292	-0.0428231	0.0262008	0.0434348	0.00531298	-0.056787	0.00578621	-0.0181988	-0.0156844	0.012106	0
81.6	0.000939672	0.0201852	-0.00421935	0.0480742	0.0081291	-0.0202505	0.0237045	-0.000157136	0.0212304	0.0225608	0
81.8	-0.00559056	0.00421773	-0.0141589	-0.00380316	-0.00315099	0.0233516	0.00871545	0.0204481	0.0661637	0.00708604	0
82	-0.0155218	-0.0499843	-0.00786982	-0.0183843	0.0228569	-0.0121007	0.0340101	-0.0439562	0.018032	-0.00554216	0
82.2	-0.00903623	-0.0141877	0.0469232	0.00736852	0.0426297	0.0126528	0.027861	-0.0218025	-0.00656992	0.0257327	0
82.4	0.00896424	0.0295392	-0.0135551	0.00577311	-0.0303345	0.0113232	-0.0250255	0.0192661	0.0154089	-0.00650064	0
82.6	-0.00240519	0.0266166	-0.0408943	-0.0013064	0.0157926	0.025403	-0.0441346	0.0762832	-0.00597216	-0.0179561	0
82.8	-0.020098	0.0206529	0.00630285	0.00276291	0.0115714	0.0177029	-0.0287322	-0.00784141	-0.00912739	-0.00864183	0
83	-0.0158248	0.0128577	0.0514671	-0.0422485	-0.000618978	0.0155826	-0.00404622	-0.00619593	0.0253904	-0.016234	0
83.2	-0.0162126	0.0430366	0.0199108	-0.0606014	0.0138142	0.0189522	0.0148008	0.0773487	0.0160595	-0.0124528	0
83.4	-0.0199139	0.0566434	-0.0181146	0.00720232	-0.02331	-0.0166378	0.0288691	0.00474365	-0.0457905	0.000418991	0
83.6	0.0122261	-0.0729214	0.0334529	0.00586972	-0.000854569	-0.0418898	0.0356135	-0.0244595	-0.053719	-0.0361083	0
83.8	-0.0200065	-0.00794044	-0.0430168	0.0443662	-0.00852841	-0.0341396	-0.0117592	-0.033426	-0.0331327	-0.00371219	0
84	-0.00474701	-0.0278263	-0.00626882	0.0725886	0.0148273	-0.00126437	-0.014772	-0.0309341	-0.0482522	0.0310896	0
84.2	0.0162069	-0.0656533	-0.0111554	0.0218498	0.0181861	-0.0047498	-0.00430778	-0.0252431	0.00460368	0.0453759	0
84.4	-0.00311491	-0.0364312	-0.0460608	-0.02554	-0.00207286	0.00339691	0.0281965	-0.00325166	0.0369501	0.0277101	0
84.6	-0.018528	-0.0277146	-0.0127041	-0.00608805	0.00219415	0.0357079	0.0451313	0.0240919	-0.00567461	-0.00577268	0
84.8	-0.00217	-0.0208336	-0.0225432	0.00732369	-0.00097647	0.0201947	-0.0281829	0.0179027	0.000106445	-0.0027565	0
85	0.0211245	0.0440123	0.00322069	-0.0166038	-0.0300302	0.0204817	-0.0548314	-0.00213028	-0.0349381	0.00708456	0
85.2	0.0155787	-0.00992574	0.0672324	-0.0394879	0.00486487	0.0118314	-0.068696	-0.0147196	-0.0612163	-0.014666	0
85.4	0.00898929	-0.03771	0.0417518	-0.0172618	-0.0112391	0.017719	-0.00878155	0.00434623	0.0208723	-0.0176283	0
85.6	0.00200463	0.0278983	-0.00139552	-0.0109563	0.000787875	0.0375459	-0.00166977	-0.0192703	0.0540672	0.0093151	0
85.8	0.00111995	0.0531232	-0.0203023	0.00231213	0.0299646	0.0216618	-0.026345	-0.0452467	0.0177752	0.00940707	0
86	-0.00164357	0.00808947	-0.0392977	0.0345081	0.00292777	-0.0274096	0.0163913	-0.010449	0.0224766	-0.00667023	0
86.2	-0.036167	0.0268006	-0.00296032	-0.0247068	0.00811366	-0.0293514	0.00947615	0.00242169	0.00293775	0.0198583	0
86.4	-0.0363402	0.0401181	0.0275404	-0.0706718	-0.0292056	0.00797502	-0.0151869	0.0164175	-0.0291809	-0.0027834	0
86.6	0.00522437	-0.00961732	0.0181396	0.0205869	-0.0449623	-0.0252931	0.0277271	0.00384905	-0.000630324	-0.012361	0
86.8	0.0147817	-0.0218216	-0.0279783	0.0836848	-0.00502452	-0.0609569	0.0252305	0.0287286	0.0272224	-0.0155083	0
87	0.00827299	-0.016658	-0.0488404	-0.00272665	0.0116948	-0.0407397	-0.01569	0.019103	-0.00914431	-0.011531	0
87.2	0.0109692	-0.0284781	-0.0119065	-0.0646643	-0.0048697	-0.023137	-0.00702063	-0.0184011	-0.032641	0.00945876	0
87.4	0.00878166	-0.000646075	0.0130538	0.00827754	0.00317085	-0.0426333	0.0173853	-0.00663841	-0.00221852	0.0127564	0
87.6	0.0209665	0.0286301	-0.0267063	0.00311089	0.000373391	-0.0193227	0.006071	-0.0371681	-0.0203694	-0.0207735	0
87.8	-0.00377125	-0.0189049	-0.00909424	0.00514323	0.00799329	0.050588	0.0451239	0.00283232	0.0273048	-0.0314021	0
88	-0.0118903	0.0265537	0.023418	-0.00271689	0.000773069	0.0517518	0.00143483	-0.0353712	0.00676285	-0.0292217	0
88.2	-0.00102243	0.0190615	-0.0142136	0.00183592	-0.0224871	0.0198505	-0.0087299	-0.0240125	-0.0016852	-0.00567114	0
88.4	0.000314827	-0.0268151	-0.0262323	0.0251711	-0.00794278	0.0255464	0.00419571	0.0181612	0.0221378	0.0114738	0
88.6	0.00887952	0.0241595	0.0349244	0.0314804	0.0341598	0.0394486	-0.00689029	0.00348982	0.0124867	0.0100709	0
88.8	0.0163779	0.0584392	0.0415401	0.0122342	0.0309559	0.00772611	0.0319098	0.0178801	0.00663603	0.0182335	0
89	-0.0377152	0.000880334	0.00620567	-0.0128916	0.0116371	-0.0324706	-0.00807509	-0.00469264	0.0125062	0.000159573	0
89.2	0.0131656	-0.0174313	-0.0292992	-0.024225	-0.0147513	-0.02024	0.0164309	0.0178413	0.0471585	-0.00618249	0
89.4	0.0327093	-0.0158257	0.0401903	-0.00353182	-0.00162818	0.0298608	-0.0176245	0.0643106	-0.00761927	-0.005203	0
89.6	-0.00790759	-0.0228518	0.0975225	-0.0144639	0.0231144	0.0313542	-0.0056045	0.0476814	-0.026516	0.00817731	0
89.8	-0.0143805	-0.0333943	0.0266553	-0.0201838	0.0034555	0.00688081	0.0136048	-0.00252671	0.011935	0.0204614	0
90	-0.00625246	-0.0301413	-0.0417852	0.0373383	-0.0329425	-0.00454295	-0.0583184	-0.0120103	0.00666703	0.00184994	0
90.2	-0.0405559	0.00404303	-0.0103581	0.0433997	-0.0263403	-0.0493018	-0.0160042	-0.0144011	0.0217322	-0.0221466	0
90.4	0.00386753	0.0225815	-0.0855609	-0.0232557	-0.0232281	-0.0126478	0.0182202	-0.0192875	-0.013235	-0.00339676	0
90.6	0.0445092	0.0168191	0.01152	-0.00877656	0.00558316	0.00616372	0.00748683	-0.00771622	-0.00974816	-0.00989556	0
90.8	0.00750384	0.0254213	0.0291079	0.00905962	0.0116328	-0.0160536	-0.0177705	-0.0170863	0.0128734	0.00478551	0
91	-0.0212204	0.0113904	-0.0573257	0.0289363	0.00752925	-0.0131139	-0.0141118	-0.0116958	0.00628703	-0.00288876	0
91.2	-0.00556844	-0.00690364	-0.0532599	0.0483946	0.0199001	-0.00400628	0.0253442	0.00774828	-0.0172635	-0.022278	0
91.4	-0.0105005	0.0402621	0.018227	0.0263606	0.0252064	-0.0250858	0.060308	-0.00218977	-0.0265572	0.0219058	0
91.6	-0.000402298	0.0554332	0.0803264	0.0592712	0.026626	0.0040143	0.0469642	0.0137093	-0.0126598	0.0270739	0
91.8	0.0230338	-0.0310371	0.0269503	-0.000754704	-0.00660987	0.0091485	-0.023062	-0.0121445	0.0207773	0.0384069	0
92	0.0273285	-0.0480337	-0.0222912	-0.0412592	-0.0167329	0.0479365	-0.066873	0.00299155	-0.00647494	0.0337358	0
92.2	0.0332927	0.00411182	0.000515327	-0.0370507	-0.0082567	0.0550102	-0.00373891	0.0245545	-0.0514299	-0.00172859	0
92.4	-0.00691214	-0.00127583	0.00839617	-0.0430455	0.00205754	0.0114418	0.0181091	0.0274787	-0.0277651	-0.00625354	0
92.6	-0.0514473	-0.0398465	-0.00250551	-0.0619733	-0.00558166	-0.0197791	-0.0235545	0.0362275	0.0127182	0.0140549	0
92.8	0.00901024	-0.00859153	0.0412073	-0.0600647	-0.035967	-0.0310434	0.0361978	0.0215759	-0.0180707	-0.0183375	0
93	-0.0120536	-0.0140694	0.00535099	-0.0246885	-0.00920822	-0.0217376	-0.0152956	-0.0191227	-0.0110685	-0.0251044	0
93.2	-0.0383861	-0.0454534	-0.000492664	0.0122638	-0.015333	-0.0276897	-0.0164917	-0.0356796	0.0296958	-0.0147883	0
93.4	0.0151151	-0.0589874	-0.027041	0.0103411	0.010958	-0.0357056	-0.0135757	-0.0549267	0.0355712	-0.044723	0
93.6	0.0398885	-0.0147763	0.00400246	-0.0205718	0.0399413	0.00172876	0.00425062	-0.0370092	-0.0175607	-0.0215082	0
93.8	0.00439959	0.0697161	0.0186996	-0.0159144	0.0129706	0.04646	0.0112432	-0.0123358	-0.0379371	0.0160205	0
94	-0.00511305	0.0787747	-0.0549222	0.04642	-0.015147	0.0441336	-0.0248553	-0.0209362	0.0107209	-0.0182147	0
94.2	0.00255907	-0.0107505	0.00479808	0.0723892	-0.00174014	0.033678	0.0041122	0.0222075	0.0108869	0.015935	0
94.4	0.0344011	0.0556692	-0.0034738	-0.0009229	-0.018505	-0.00553784	-0.00629319	0.0208835	0.00401996	0.048757	0
94.6	-0.0172435	0.0196867	-0.0101822	0.00357659	-0.029722	-0.0128297	0.0287915	0.00911239	0.0204439	0.0270459	0
94.8	-0.0202848	0.035961	0.00569515	0.00574905	-0.00673483	-0.00736371	0.0294832	0.0302617	0.0367317	0.00390521	0
95	0.0333769	0.0313777	0.0313725	-0.0190822	0.0146178	-0.0363218	-0.00110064	0.0246723	0.0187364	-0.00354349	0
95.2	0.022835	-0.0682896	0.0508223	0.0227907	0.00166575	-0.0283211	-0.008278	-0.0161587	0.0112451	0.00263308	0
95.4	-0.0275268	-0.0472855	0.0266659	0.0711631	-0.00887206	0.040835	-0.0180464	-0.0142088	0.0484547	0.0258146	0
95.6	-0.0178964	-0.0123173	-0.0118026	-0.00314001	0.0185101	0.000973039	-0.00318312	0.0180587	0.0259826	0.0130014	0
95.8	0.0135345	-0.0114404	0.0199959	-0.00502812	-0.00429868	0.014908	0.01213	0.0725588	-0.0178447	-0.00336295	0
96	0.0108468	0.00221637	0.000607363	0.0285781	-0.00534773	0.0122792	0.0275081	0.0369833	-0.0188946	-0.0128994	0
96.2	2.08791e-05	-0.00674681	-0.0357235	-0.00196935	-0.000899027	-0.00354203	0.0119252	0.00657166	-0.0204003	-0.0197972	0
96.4	-0.00453398	-0.0244035	-0.007994	-0.0189168	0.0211787	0.00410702	0.0417574	0.0079596	-0.0140136	-0.0270981	0
96.6	-0.00786347	-0.00271936	0.0353006	-0.0105816	0.0499296	0.00422106	0.0688345	-0.0143437	-0.00348521	-0.0237943	0
96.8	0.0150911	0.0265649	0.0110399	-0.0526295	0.0036889	-0.0104121	-0.047543	-0.00808635	-0.0440242	-0.00157031	0
97	0.0406377	0.0472695	-0.0493234	0.0640578	0.00484308	0.00296528	-0.0194578	-0.0116152	-0.0099567	0.0103071	0
97.2	0.00816312	-0.00328218	-0.0254888	0.00582733	-0.00118532	0.0383323	-0.0518897	-0.0114423	-0.00360984	0.0190806	0
97.4	-0.00170258	-0.0083865	-0.0126937	0.0252864	0.0103035	0.0295646	-0.0309381	-0.000207457	0.0122427	0.018547	0
97.6	-0.00385313	0.00951956	0.00359115	0.0161632	0.00067029	0.013916	0.0141896	-0.00592771	0.0144806	0.00504576	0
97.8	-0.0184133	0.00935351	0.0182699	-0.0307834	-0.0176061	0.0120403	0.000208844	-0.0167633	-0.0107686	0.000448443	0
98	0.00183596	0.0232284	0.000157804	0.0461958	0.00338774	-0.0193401	0.0055538	-0.0110539	-5.93252e-05	0.018249	0
98.2	0.0198418	0.00743652	0.0406682	-0.0532825	-0.00798588	-0.0364218	0.0321843	-0.0194022	0.0219208	0.0210667	0
98.4	-0.00557089	0.0063685	-0.0271319	-0.0403994	0.0108073	0.00565089	0.0230177	0.00497773	-0.00022559	-0.014149	0
98.6	-0.00281033	-0.0119835	-0.0213864	-0.0181023	0.00701479	0.00036373	-0.00111209	0.0335744	-0.0155862	0.0153333	0
98.8	-0.0140875	-0.0339302	0.009413	-0.0429005	-0.0188005	-0.0131391	0.000242475	-0.0264268	-0.0123494	0.00382565	0
99	-0.0257874	0.0106243	-0.0133267	-0.0185752	-0.0177405	-0.0184444	0.016246	-0.0509489	0.0072748	-0.00271794	0
99.2	0.00197815	0.0505091	-0.0243442	0.0329057	0.00165463	-0.0197067	-0.0110007	0.0206182	0.0215449	0.00153897	0
99.4	0.0213756	-0.00609631	-0.00157402	0.0193689	-0.00627552	0.00816546	-0.0609555	0.0186363	0.00331519	-0.0754907	0
99.6	0.0192903	-0.000726259	-0.011909	0.0451475	-0.0202734	-0.00223999	-0.000701721	-0.0218562	-0.00848574	-0.00609557	0
99.8	0.00592348	-0.0476375	0.0139217	0.032914	-0.0213974	0.00498109	0.0711472	-0.00528142	-0.0313443	0.000363037	0
100	-0.0310232	0.00564577	-0.0350772	-0.027806	-0.00253816	0.000667181	-0.00152701	0.00189623	-0.0399807	-0.00454735	0
100.2	-0.0373532	-0.00116983	-0.0340293	0.00060569	0.0160948	0.00518379	-0.0400304	0.0462057	-0.00772175	0.0207271	0
100.4	-0.00890912	-0.0324175	0.0541021	0.0262867	0.0107198	0.0167906	0.00970328	0.0300657	0.0376527	0.0121077	0
100.6	0.00161016	0.0298249	0.0649211	-0.0527074	0.000522021	-0.00431897	-0.00253141	-0.0597072	0.0291241	-0.00673958	0
100.8	-0.00556828	-0.0254484	-0.0115095	-0.0445418	0.0136401	-0.028383	-0.0418326	0.0100035	-0.0191169	0.0281221	0
101	-0.018186	-0.00488215	-0.056761	-0.0120934	-0.000575818	-0.0147993	-0.0241054	0.00656145	0.0243506	-0.020073	0
101.2	0.00430792	0.000214885	-0.0196214	-0.0102131	-0.0250328	-0.0166955	0.0688213	0.0363336	0.0261589	-0.0341956	0
101.4	0.0299181	0.0363966	-0.00184817	-0.00201905	-0.00350974	-0.024544	0.0379947	0.0151803	0.0290086	-0.00981018	0
101.6	-0.0136655	0.0240194	0.027195	-0.00805314	0.0132373	-0.00219284	-0.0249799	-0.0169234	0.0332116	-0.00642985	0
101.8	-0.0395061	-0.0313797	0.0375549	-0.0191924	-0.00286756	0.00281679	-0.017109	0.0390686	0.000271697	-0.00269397	0
102	0.0260413	-0.0235442	-0.0285753	-0.00483837	-0.00304805	-0.0456598	-0.0226936	0.0460477	-0.0290646	0.0171753	0
102.2	0.00579488	-0.0496884	0.00209192	-0.0208636	-0.0010491	-0.0427472	0.0130113	-0.0894494	-0.0409161	-0.0119775	0
102.4	-0.00989438	0.0341267	0.0114805	0.0221007	0.0132986	0.0205918	0.0169142	-0.00996404	-0.0629009	-0.00735678	0
102.6	0.0516455	-0.00767457	0.00473017	0.0224758	0.0302835	0.0524687	-0.0349291	-0.00821055	-0.0343415	0.021073	0
102.8	0.0443609	0.0111013	0.0338077	-0.0058971	0.0286322	0.0510224	-0.0363602	-0.0159855	-0.00718763	0.00803007	0
103	-0.0186147	0.0390251	0.0128071	-0.00346474	-0.00963922	0.0304414	-0.00746694	0.00461766	-0.00270004	-0.0116633	0
103.2	-0.00492639	-0.0307524	-0.0380313	0.0093705	-0.0331963	0.0036587	-0.0322271	-0.00718459	-0.0016283	0.00584113	0
103.4	0.0202602	0.0187021	0.0187968	0.0165849	-0.000935264	0.0117042	-0.0492922	0.0292134	-0.0105947	0.0115735	0
103.6	-0.0422848	0.021933	0.0128091	0.0487843	-0.020198	0.0232078	0.00731446	-0.0132555	0.0141556	-0.0012295	0
103.8	-0.0175918	-0.000697169	-0.0439826	-0.0074969	-0.0223591	-0.0444928	0.0412326	-0.0637368	0.010172	-0.0136783	0
104	0.00919833	-0.0234344	-0.0278627	-0.0136322	0.00145448	-0.0554223	0.00615913	-0.0109016	0.0348391	-0.0204863	0
104.2	-0.0280549	-0.0226378	0.00280291	0.0390631	0.0191875	-0.0200433	0.0069315	0.00892606	0.00302617	-0.0176193	0
104.4	-0.0310218	-0.0147897	0.022307	0.0398704	0.0103564	-0.00840156	0.030299	0.00954422	-0.0150928	-0.0132086	0
104.6	0.0214056	-0.0132039	0.0269812	-0.011737	-0.0191323	0.000236095	0.00713525	0.0635735	0.0520012	-0.0222581	0
104.8	0.0118456	0.00582266	-0.0609309	-0.026313	-0.0207278	0.0106177	0.0182556	0.00617624	-0.00678288	-0.0242896	0
105	0.0153255	-0.0173143	-0.0256663	-0.00683427	0.043323	0.000343625	0.00634042	-0.00473271	-0.0432892	0.0176511	0
105.2	-0.0272351	0.00255251	0.0299203	-0.0440135	0.00673382	-0.00729032	-0.00758544	0.000828636	-0.048602	0.00769359	0
105.4	-0.023208	0.0209341	0.000970572	-0.00841842	-0.0154409	0.0179404	-0.00365158	-0.0357962	0.00745518	0.0270379	0
105.6	0.0262414	0.0171579	-0.0275664	0.0230169	-0.0118448	0.0315751	0.0229593	-0.0257724	0.0425249	0.0403692	0
105.8	0.0220561	0.00734362	0.00877824	-0.0323533	-0.0186193	0.0238299	0.024966	0.0236201	0.00881424	-8.42359e-05	0
106	-0.00988998	0.000651074	0.0296759	-0.0402555	0.00904678	0.0232851	-0.022195	-0.00408055	-0.00214428	-0.00355359	0
106.2	0.0153631	0.0335263	0.000280241	-0.00229357	-0.00320884	-0.00951554	-0.0197934	-0.0248997	0.0154389	0.0175108	0
106.4	-0.00987388	0.00800004	-0.0130424	0.0213177	0.0208853	0.0133286	0.0174884	-0.0163206	0.0132315	-0.00255149	0
106.6	-0.0156035	-0.00611402	-0.0176271	0.0370248	-0.0148333	0.0112119	-0.00241887	-0.0115972	0.00466795	0.0109339	0
106.8	-0.0236755	-0.00215735	-0.0156376	0.0259959	-0.00709939	-0.0188217	-0.0217971	0.0203048	-0.00951111	-0.0021953	0
107	-0.0237568	0.0244907	-0.00353042	-0.00791672	0.0226116	-0.0187007	0.00173798	0.0412554	0.00544245	-0.0272122	0
107.2	-0.00226494	0.0375001	0.0169385	-0.00414459	-0.0101868	0.00209289	0.0161296	0.0101631	0.0348588	-0.00828515	0
107.4	-0.0178786	-0.0280085	0.0289156	0.0305676	0.00151367	-0.0148403	-0.00091158	0.00340973	0.00922484	0.00497562	0
107.6	0.0131522	-0.0393858	-0.00809396	-0.0170932	0.0215645	-0.0475965	-0.0127864	0.0238824	0.00153623	0.0446832	0
107.8	0.0462303	-0.0642818	-0.0153238	-0.00936134	0.013883	0.0264687	0.0137408	-0.0149732	-0.0303747	-0.000751435	0
108	0.0212418	-0.0243615	0.00394724	0.0273838	-0.004274	0.0489704	0.0075195	0.0153587	0.000472879	0.00804821	0
108.2	0.00804326	0.00307585	-0.00569425	0.0202636	-0.00777273	0.00423313	-0.00387205	0.0226478	-0.0082015	0.0125135	0
108.4	0.0250529	-0.00760706	0.00529628	0.0112176	-0.00464734	0.000201732	0.00109199	-0.0271843	-0.022585	-0.0186168	0
108.6	0.00371202	0.0193758	0.0540563	0.0311563	-0.0128525	0.0244357	0.00521893	-0.0202981	0.0547239	0.00333658	0
108.8	-0.0185657	0.0156911	0.00571237	0.0083697	-0.020359	0.0155482	0.0299361	-0.020667	0.0297224	-0.00584857	0
109	0.0113415	0.0341388	-0.0393223	0.00242531	-0.0114248	0.0235122	-0.0298535	0.00703872	0.0208142	-0.0120035	0
109.2	-0.0104328	0.0249331	0.00603064	0.00152542	0.00606372	0.00660517	-0.0242717	0.00621519	-0.0288934	0.00980771	0
109.4	-0.00190015	0.00900494	-0.00818294	-0.0239211	0.00852289	-0.00086361	0.0316979	0.0220147	-0.0251968	0.0147759	0
109.6	0.0120749	0.00380286	-0.019783	-0.0814518	-0.00273384	-0.0220168	0.018368	0.0156426	-0.00704913	-0.00116041	0
109.8	-0.013158	0.000177663	0.0265192	-0.0923664	-0.00265302	-0.051469	-0.0305226	0.00253248	-0.0307027	-0.00726511	0
110	-0.00964891	0.0104546	0.0147891	-0.00369522	0.0116782	-0.0201785	-0.00372793	0.0531252	-0.0222042	-0.0086357	0
110.2	-0.0238901	0.0218183	0.0567988	0.0399695	0.0140347	-0.00290309	0.0242299	0.0101441	-0.0261603	-0.01504	0
110.4	0.0100461	-0.0139946	0.0597112	0.00710369	0.0210945	-0.0155762	-0.0109064	-0.0217923	0.0377342	-0.00217477	0
110.6	0.0080675	0.00463751	0.0048558	-0.0207074	0.0116723	-0.0118928	-0.0188888	0.000763461	0.0463633	-0.00629333	0
110.8	-0.00274794	0.0156269	-0.0708527	0.000684443	-0.0207123	0.0078869	0.00763946	-0.00274395	-0.00559125	0.00550697	0
111	0.0069963	-0.0248989	-0.0534595	0.0261576	-0.0317357	0.00884205	0.00535109	-0.0414162	-0.0117312	0.0161242	0
111.2	0.00574015	-0.0360351	0.0270846	0.0159682	-0.012497	-0.0124578	-0.0231835	-0.0400361	0.0339445	0.00203776	0
111.4	-0.00418121	-0.00644263	-0.00313736	0.0160379	-0.00624387	-0.0119659	-0.0158777	0.0107046	0.031574	0.0171798	0
111.6	-0.0352119	0.000299729	0.0119203	0.0547125	0.0179727	0.0280282	0.0131322	0.0431778	-0.0156736	0.0088131	0
111.8	-0.0186953	0.0332348	0.0359755	0.0174142	0.0050592	-1.36992e-05	-0.0172739	-0.0164022	0.0139425	0.0142873	0
112	0.0265727	-0.0322899	-0.00304545	-0.00469829	-0.0335189	-0.0105892	0.0139966	-0.00521248	0.0222224	-0.00662294	0
112.2	0.0232204	-0.020522	-0.0459406	0.00410685	-0.0121334	0.00434277	0.0182613	0.00902754	-0.000578874	-0.0300528	0
112.4	-0.00444607	0.0649355	0.0115586	0.00773955	0.0404165	0.0141632	-0.0126718	-0.0115512	0.00212172	-0.00097864	0
112.6	-0.00317556	0.0200799	0.0830417	0.0178599	0.0329515	0.0202501	0.0409532	0.0104638	-0.00808316	0.0270896	0
112.8	-0.0188125	0.0287565	-0.0153066	-0.00656933	0.0187882	-0.0165394	0.0302714	-0.0406749	-0.040295	-0.0168579	0
113	0.0221459	-0.0246088	-0.0592431	-0.0567262	0.0143344	0.00970286	0.00182089	-0.0169127	0.00298467	-0.0119792	0
113.2	0.0180065	-0.00521922	-0.015818	-0.0380014	-0.0121135	0.0170322	-0.0060855	0.020558	0.00157075	-0.00242989	0
113.4	0.0249889	-0.00848354	-0.00938117	-0.0156703	-0.0379129	0.00395831	0.00978478	0.054077	-0.0114797	-0.0170151	0
113.6	0.0480882	-0.0404358	-8.22316e-05	0.00360296	-0.0137737	0.00462652	0.00900917	0.0335685	0.00509973	-0.0195967	0
113.8	0.0296335	-0.0158333	0.0290053	0.0263928	0.0143378	0.00137181	-0.0278912	-0.0212681	0.00672602	-0.000900006	0
114	0.00451391	-0.00158451	-0.00976218	0.0157331	-0.014394	-0.0214795	-0.0569244	-0.0114532	-0.02542	-0.00137941	0
114.2	-0.0107156	-0.0136585	0.00798165	0.0675203	-0.000744438	-0.0250837	-0.0490516	-0.0350085	-0.0515327	-0.0177863	0
114.4	-0.0151348	-0.000392905	-0.026857	0.0317681	0.0112014	0.0232005	-0.0270341	-0.0375438	0.012805	0.0115821	0
114.6	-0.0217083	0.0115506	-0.0340741	0.0101358	0.00998627	-0.0153845	-0.010472	0.0128311	0.0165359	0.0216616	0
114.8	-0.0516504	0.0137578	-0.0310924	-0.0094254	-0.000317336	-0.0198553	0.00216359	0.0200377	0.00118212	0.0129137	0
115	-0.0407586	0.00834829	-0.0142572	-0.0332249	-0.0014669	0.0306599	0.0360605	-0.00821917	0.0314388	0.0130295	0
115.2	0.0132069	-0.00445544	0.0416584	0.00122209	0.00992266	0.0149651	0.0554518	-0.00958303	0.0263645	0.0177859	0
115.4	-0.0180223	-0.00867018	0.0283327	0.0256984	-0.00102716	0.00748015	0.00409632	-0.019377	-0.0199971	0.0221143	0
115.6	-0.0345588	-0.0102725	-0.00958073	-0.0195629	-0.0203619	-0.00347945	0.0117107	0.0471519	4.36195e-05	-0.0144631	0
115.8	0.0117865	0.0344781	0.0741836	-0.0693366	-0.00829164	0.0142189	0.0225164	0.0673489	0.0213552	-0.0445169	0
116	0.0109712	0.0237146	0.0362659	-0.0119717	0.0168258	-0.00409235	-0.0319688	0.0248599	0.0198233	-0.0160152	0
116.2	-0.00378301	-0.0142261	-0.0414605	-0.0185951	0.00111589	-0.0294028	-0.0177457	-0.00223483	-0.0118836	-0.0033605	0
116.4	0.019251	-0.0042999	-0.0234149	-0.0347894	-0.00338555	-0.0256658	0.0308321	-0.00529718	-0.0177803	-0.00399644	0
116.6	0.0129136	0.00680862	-0.028102	0.085627	0.0299667	-0.0280114	-0.0322219	-0.0175803	0.0156059	0.0238496	0
116.8	-0.00916341	-0.00573822	-0.00635369	-0.00816034	-0.0276444	-0.00903319	-0.0196959	-0.00506851	-0.0332638	-0.0287344	0
117	0.00335028	-0.00745932	-0.0330162	0.000910246	0.00235491	0.00454927	-0.0135148	-0.00512646	-0.000727375	0.0151928	0
117.2	0.0137653	-0.0187098	0.00853468	0.0181712	0.0351749	0.00910887	-0.033727	-0.0236458	-0.00217711	0.0188934	0
117.4	0.0140741	-0.0349031	0.0332475	-0.0219083	-0.0040837	-0.0153726	-0.0252917	0.00860573	-0.0231217	0.00772487	0
117.6	-6.51462e-05	-0.0139996	0.014778	-0.0254087	-0.0228608	-0.00131836	0.0394238	0.0143712	-0.0103839	0.0152944	0
117.8	-0.0138377	0.00344043	-0.00022611	0.0144411	-0.00127461	0.0410231	0.0773785	-0.0460708	0.00584853	0.00290918	0
118	0.00457055	-0.0128974	-0.0462371	-0.00117173	-0.0314973	0.000225997	0.0279169	-0.0305509	0.0011589	0.00325977	0
118.2	0.00811666	0.0653966	-0.0344641	-0.0278829	-0.0193147	-0.00622342	0.0309874	0.0140602	-0.019959	0.0143434	0
118.4	0.0106176	-0.0248537	0.0112788	0.0050237	-0.00834784	-0.0113173	0.0300211	0.0127795	0.0043337	-0.00325731	0
118.6	0.0327934	-0.00458832	0.0235535	-0.0122408	0.0218219	0.0182241	-0.00933701	0.0125028	0.0478702	-0.0322947	0
118.8	0.017977	0.038761	0.012198	-0.0313105	0.00356455	0.0253798	-0.0207955	0.0192476	0.0319535	-0.0323511	0
119	-0.0186587	0.00765335	0.0216781	-0.0106318	-0.0103039	-0.00173457	-0.0256472	-0.00207889	-0.000337077	-0.0171146	0
119.2	-0.0177726	0.0173734	0.0314862	0.00980045	0.0355854	0.000920266	-0.042352	-0.0380208	-0.00165728	-0.00679964	0
119.4	-0.00809478	-0.0281013	0.0124619	0.0468018	0.000231941	0.0061936	0.0126489	-0.0292616	-0.0398081	0.0222938	0
119.6	0.0408813	0.00721379	0.0523868	-0.00123704	0.0341827	0.0105734	-0.0229185	0.0390364	0.00262015	0.0241416	0
119.8	0.00898654	0.0233507	0.0389368	0.0532037	0.0108765	0.0141386	-0.0222624	0.0332691	0.028978	0.0114531	0
120	-0.0185254	0.0330176	-0.0292503	0.0584995	0.0241974	-0.0326407	-0.00517136	0.0284041	0.00682285	0.0470795	0
120.2	0.00318735	0.0317043	0.00447403	0.06234	0.0175347	-0.0164721	0.00700525	0.0628325	0.0322394	0.0481924	0
120.4	0.0210475	0.0223786	0.0925168	0.0919938	-0.0132075	0.0516858	0.0497809	0.0568127	0.0670269	0.0147941	0
120.6	0.0304237	0.068985	0.0601361	0.0153282	0.0451011	0.0183479	0.0724554	0.000191214	0.0250033	0.0576385	0
120.8	0.0405076	0.114759	0.0434429	0.0546612	0.000742252	0.0238133	0.0136821	-0.00531694	0.0667755	0.0523652	0
121	0.0332533	0.0749218	0.0325472	0.0727516	0.0402959	0.0337488	0.00661732	0.0687659	0.102021	-0.00340306	0
121.2	0.0159612	0.0224802	0.0114242	0.062688	0.0359577	0.009117	0.00727066	0.0391088	0.0656595	0.0104366	0
121.4	0.01483	0.0841033	0.0265213	0.0213751	0.0232596	-0.00665645	0.0376817	0.026551	0.0311179	0.03968	0
121.6	0.0295983	0.121327	0.0461777	0.0191286	0.0339412	-0.0143161	0.0495112	0.0383526	0.0652723	0.0488213	0
121.8	0.0378949	0.0712897	0.0414384	0.0761272	0.0140062	-0.00932632	0.0111334	0.0146493	0.0822312	0.0493533	0
122	0.0364377	0.11726	0.077029	0.0704341	0.0015177	0.0347883	0.0301617	0.0812001	0.022214	0.0126565	0
122.2	0.0334359	0.065569	0.104198	0.0530429	-0.0102401	-0.00119177	0.0439121	0.0720496	0.0672465	0.0291517	0
122.4	0.00970171	0.0463742	0.0862995	0.0364937	0.00457233	0.00672751	0.0700668	0.0320469	0.0382835	0.015918	0
122.6	0.0513713	0.0869767	0.0303611	0.0565255	0.0259141	0.0133465	0.0328461	0.0883676	0.055043	0.00689083	0
122.8	0.0687693	0.100447	0.0139359	0.0920387	0.0144581	0.0116856	0.0500588	0.103378	0.0735657	-0.00443342	0
123	0.0469183	0.0991926	0.0784768	0.0909647	0.0160786	0.022608	0.122835	0.0310253	0.0648989	0.0214605	1
123.2	0.0935704	0.124349	0.139349	0.0957773	0.0810238	0.058053	0.117436	0.05357	0.111577	0.104908	1
123.4	0.123723	0.1235	0.116145	0.155939	0.110788	0.140341	0.129203	0.159196	0.104845	0.0958688	1
123.6	0.112431	0.184001	0.115571	0.0820648	0.0462063	0.0933869	0.112239	0.170535	0.115467	0.0695894	1
123.8	0.0944294	0.149881	0.0788002	0.0403658	0.0724743	0.0717425	0.146515	0.0850554	0.147003	0.0493616	1
124	0.0958498	0.130455	0.0632311	0.103148	0.0909595	0.0412462	0.117096	0.0843658	0.100352	0.0383908	1
124.2	0.106276	0.107584	0.0457378	0.129506	0.0328359	0.0323127	0.0792753	0.117236	0.0605168	0.0285907	1
124.4	0.0848474	0.0615495	0.0343421	0.0617039	0.0153162	0.0696206	0.094407	0.0566965	0.0818681	0.0351479	1
124.6	0.0304289	0.10024	0.088451	0.0210672	0.0533875	0.0344194	0.0399118	0.0266154	0.0439297	0.0509181	1
124.8	0.0134188	0.0513013	0.0388358	0.0308619	0.0127805	-0.0115577	0.00614941	0.103995	0.00858716	-0.0100677	1
125	0.00365714	0.0352594	0.0314067	0.0137816	0.0122605	-0.0263319	0.0234686	0.0222405	0.018348	-0.0451834	1
125.2	0.0334407	0.00371613	0.0200888	0.0222345	-0.00866847	-0.00374291	0.0733532	0.0084631	0.0325304	-0.0128325	1
125.4	0.0260026	0.0195866	0.0084116	0.00878866	-0.0389146	-0.0231366	0.0862519	0.0161344	0.03987	0.0092487	1
125.6	-0.0204323	0.0238508	0.00537336	-0.0380488	-0.0239494	-0.0349161	0.0434194	-0.00847536	0.0162558	-0.013373	1
125.8	-0.0159713	-0.0146907	-0.00437992	-0.00303386	-0.0101498	0.0152848	0.00887807	0.0190475	-0.0267264	-0.0428225	1
126	0.00866501	0.050846	0.00154767	0.0827742	-0.0443416	0.0141946	0.0309596	0.000125758	-0.0206646	-0.0543269	0
126.2	-0.0117027	-0.0256505	-0.0366433	-0.0208215	-0.0349674	0.00672559	0.062568	-0.0552416	-0.0287822	-0.028124	0
126.4	-0.0368075	-0.0144387	-0.0312559	-0.0232033	-0.0136283	-0.045755	0.0114414	-0.0215684	-0.0184823	-0.0469116	0
126.6	-0.0362562	-0.00738976	-0.0143512	0.0069383	-0.0167023	-0.0237642	0.0151467	0.00391327	-0.00401286	-0.0484729	0
126.8	-0.0292268	-0.0101522	-0.000188868	-0.0187417	-0.0242337	0.0213351	-0.0102981	0.00778165	0.0102272	-0.0267582	0
127	-0.0346398	0.0142386	0.00564275	-0.0351422	-0.016564	-0.00233624	-0.0625415	-0.00198564	0.0121628	-0.0322515	0
127.2	-0.0405328	0.00717681	-0.00236387	-0.0188684	-0.0137209	-0.0165432	0.000889909	-0.0333032	-0.0121321	-0.0389122	0
127.4	-0.0342239	0.0297506	0.0124058	-0.0128442	-0.0300466	0.0171491	0.00423939	0.0174427	-0.0141701	-0.0119702	0
127.6	-0.0269964	0.00318328	-0.0707626	-0.0321569	-0.0407593	0.0126605	0.00576101	0.0083768	-0.00285899	-0.0194526	0
127.8	-0.0338471	0.00662805	-0.0979421	-0.0346381	-0.058632	-0.0080974	0.00553958	0.035626	-0.0240666	-0.00704017	0
128	-0.0399922	0.0309564	-0.0399536	-0.00214385	-0.0354792	-0.0193938	0.00779893	-0.0210921	0.0133708	-0.0132386	0
128.2	-0.0423266	0.00584691	0.00500281	0.0188048	-0.010938	-0.0237069	-0.00824468	-0.0527224	0.017512	-0.0637582	0
128.4	-0.0324597	-0.0342628	0.0113668	-0.00388538	-0.0122431	-0.0346054	-0.0424624	0.00991756	-0.0400167	-0.078811	0
128.6	-0.00887084	-0.0101446	0.00254308	-0.0153861	-0.00597594	-0.0497288	-0.0402903	-0.0419989	0.00466319	-0.0206135	0
128.8	-0.0244073	0.0137614	-0.0564111	0.0124748	-0.0749356	-0.0284832	-0.0112523	-0.0202966	-0.0125752	-0.00325671	0
129	-0.00589985	0.00638392	-0.043893	-0.0603064	-0.016465	0.0168848	0.0128215	-0.0171424	-0.0136523	-0.0454584	0
129.2	0.00398739	-0.0179599	-0.0306792	0.00466979	-0.0160019	-0.00740409	0.0178327	-0.00770521	-0.0225388	-0.0394821	0
129.4	0.0150404	-0.0478899	-0.023964	0.0311241	-0.0258252	-0.0337897	0.0175612	-0.0102553	-0.0167207	-0.0328304	0
129.6	-0.00637573	-0.0300269	0.00617913	-0.026564	0.00454338	-0.014532	-0.00225834	-0.0475252	-0.0110657	-0.0178507	0
129.8	-0.0600313	0.0155805	-0.011994	0.0111229	-0.00955346	3.0114e-05	-0.0282868	-0.0516649	-0.0216618	0.0193014	0
130	-0.0238676	-0.0253982	-0.0727366	-0.0219767	-0.00419894	0.0125893	0.00233059	-0.00561227	0.0239151	-0.0335238	0
130.2	-0.0219892	-0.0334993	0.0502774	-0.0491864	-0.0336907	0.00531747	0.0137011	-0.0272751	0.0129003	0.00854263	0
130.4	-0.00917852	-0.0201694	0.0744249	-0.034938	-0.027791	0.029165	-0.0160124	-0.00472906	-0.0287008	0.00189619	0
130.6	-0.0105296	-0.0145798	-0.00479724	0.0150874	0.000319	0.0178978	0.000241085	0.0221153	-0.049465	0.00719251	0
130.8	0.00710394	0.000573482	-0.00833275	-0.00469993	0.0122113	0.0200699	-0.0163846	-0.0112214	-0.0145374	0.0290948	0
131	0.0393463	0.0156755	0.009504	-0.0490946	0.00249171	0.0463864	-0.0487191	-0.0151396	0.0162421	0.00497494	0
131.2	0.0185033	0.00316352	-0.0476805	0.0123304	-0.00390513	0.00178683	0.0313963	0.0441157	-0.0217001	-0.0112882	0
131.4	0.00740298	0.00440467	-0.00623822	0.021518	0.0253611	-0.0199468	0.0440495	0.00498979	-0.024838	0.016003	0
131.6	-0.0263058	0.019238	-0.0251379	-0.0233997	0.0294654	0.0297617	-0.0159436	0.00391198	0.0245904	0.0220561	0
131.8	-0.0125256	-0.00339221	-0.0131337	0.0107945	0.0197342	0.0123184	5.85886e-05	-0.0144443	0.0752665	0.0138104	0
132	-0.00461754	-0.00539723	-0.0449476	0.0388753	-0.0115881	-0.0367942	-0.0155714	0.0138488	0.0389157	0.00628026	0
132.2	-0.00880682	-0.0148301	-0.0892583	0.020841	-0.0158449	-0.0213044	-0.0232787	0.023391	0.000548365	0.0155994	0
132.4	-0.00431158	-0.0247198	-0.0232749	0.0274789	0.0145094	0.00399921	0.0467423	-0.00811303	0.000492562	0.0133873	0
132.6	-0.0259269	0.0435532	0.0465711	0.0164743	-0.00368254	-0.0226267	0.0163734	0.0559931	-0.0627916	-0.022397	0
132.8	0.0181549	-0.0115921	0.0191509	-0.0585851	-0.00794995	0.0121466	-0.0412742	0.00491371	-0.0262381	0.013693	0
133	0.0110068	-0.0248132	0.00795481	-0.0345139	-0.0058075	-0.0181427	-0.019256	0.0420999	0.00669721	0.00546437	0
133.2	0.00714689	-0.0110761	0.0696456	0.0287328	0.00126933	0.0121492	-0.00674736	0.0114551	0.004545	0.00271636	0
133.4	0.0124631	-0.0139672	0.0681373	0.00890099	0.0107591	0.0393737	8.63376e-05	-0.047495	0.00741645	-0.000887864	0
133.6	-0.000833756	-0.00338156	0.00387501	-0.0334413	0.0166383	-0.0113025	0.0225922	-0.00951526	0.0223249	-0.0206433	0
133.8	-0.00710214	0.0120921	0.0187651	-0.0111675	0.0117085	-0.0397565	0.0212282	0.0216289	0.0126569	-0.0111226	0
134	-0.00619145	-0.00103023	0.0445274	-0.0185243	0.00143642	-0.031089	0.0132707	-0.0272785	-0.0263478	0.000342748	0
134.2	-0.00039482	0.0369781	-0.0190711	-0.0472788	0.025993	-0.00248338	-0.00649217	-0.0237522	-0.0193903	-0.0159279	0
134.4	0.00970469	0.0082229	-0.0308816	-0.00870721	0.00443098	0.0277028	0.0479251	-0.00635884	0.0249133	0.00416755	0
134.6	-0.0104175	-0.00804257	0.00717099	0.0278048	-0.0185453	0.0177053	0.0228338	-0.0202919	0.0187994	-0.00466585	0
134.8	-0.00130072	-0.00533292	-0.00144699	0.00232125	-0.0174051	-0.00392521	-0.0193233	-0.0327067	-0.0367145	-0.0220032	0
135	0.0263244	-0.0334704	-0.0393455	-0.0166166	-0.0222915	0.0185099	0.0100835	0.00131152	-0.0436095	-0.0122789	0
135.2	-0.0135039	-0.026082	-0.0384391	0.0175419	-0.0202729	0.0363042	-0.01746	0.0359572	0.00513891	-0.0317071	0
135.4	-0.0137261	0.0206265	-0.0464445	0.0192941	0.000172867	-0.0335343	-0.0359176	-0.014566	-0.00910521	-0.035703	0
135.6	-0.015335	0.0384583	-0.0202199	0.00844222	-0.0112611	-0.0465485	-0.0106115	-0.0252075	-0.00518537	-0.00246741	0
135.8	-0.0171146	0.040921	-0.00593823	-0.00467116	-0.0311934	0.0173368	-0.0475476	0.00947174	-0.0153495	0.0343695	0
136	0.0405482	-0.00716116	0.0178057	0.0317754	0.0130091	0.0253377	-0.0641304	0.0331339	0.0172544	0.0107359	0
136.2	0.0494858	-0.0434161	0.0387563	0.0145613	0.0343259	-0.0237603	-0.019514	0.0277479	0.0300484	-0.0086623	0
136.4	-0.0325811	-0.00169696	0.00422454	-0.0540026	-0.0204615	-0.0158194	-0.0128854	-0.000636294	-0.0231729	0.0266613	0
136.6	-0.0197122	0.0105789	-0.0308576	0.0238156	-0.00194477	0.0199132	-0.0255756	-0.0188111	-0.00105944	0.0192377	0
136.8	-0.00044076	-0.0161739	0.014829	0.0183965	0.0316104	-0.0249609	0.051709	0.0331012	-0.00542216	0.0123102	0
137	0.00263334	0.0302979	0.045941	0.0187266	-0.0118728	-0.0438599	0.0567513	-0.0393752	0.026874	0.0236951	0
137.2	-0.0156355	0.0463464	-0.0221556	-0.0231762	-0.0169725	-0.0165446	-0.00314709	-0.0642531	1.59076e-06	-0.010218	0
137.4	-0.00502432	0.00142766	-0.0470006	-0.014734	-0.00918642	0.0165618	-0.00356762	-0.0140098	-0.0189422	-0.0157948	0
137.6	0.0369528	-0.00914136	0.00288134	0.0210488	-0.0149938	0.0187864	0.041648	-0.0131413	-0.0146207	-0.000456259	0
137.8	0.0271738	0.0387943	-0.0119651	-0.0319599	0.00687982	0.0013856	0.0169235	-0.035271	-0.0513545	-0.0297097	0
138	-0.0256233	0.0439894	-0.027286	-0.0077942	-0.0244045	0.019103	-0.0353791	-0.00779875	0.0133189	0.0117657	0
138.2	0.0161586	-0.0511703	0.021755	-0.030842	-0.00594318	0.0213938	0.0216514	0.0163623	0.0426923	-0.00644737	0
138.4	0.0276092	-0.0325212	0.0451638	-0.0397624	0.0116251	-0.0112312	0.0204899	0.0215315	0.0148562	-0.00435234	0
138.6	0.000562477	-0.0186888	0.0704539	0.0310585	0.0219534	-0.00208479	0.0117799	0.0272894	-0.0251673	0.00647019	0
138.8	-0.00555534	-0.0393217	0.0748196	0.0397742	0.0232	0.0429586	0.0100639	0.0230853	-0.0113564	0.00668784	0
139	-0.00033213	-0.0120722	0.0263552	-0.0180769	0.0282012	0.0337659	-0.0287884	0.0215939	0.0276568	0.00891263	0
139.2	-0.00855571	-0.0072432	-0.0108723	0.0292899	0.0420128	-0.019164	-0.029519	0.0343842	0.0173699	0.00857284	0
139.4	-0.00921072	-0.00677533	-0.040578	0.0354746	-0.0159797	-0.00664339	0.00134828	-0.0148317	0.0296968	0.028656	0
139.6	-0.009998	0.0105514	-0.0146175	0.0599616	0.0208461	0.00232805	0.000137654	-0.00864399	-0.000134107	-0.0171657	0
139.8	0.0244382	0.00383546	-0.0197765	0.0419427	0.0259316	0.00352335	-0.026108	0.0229011	0.014265	0.0132164	0
140	0.0285115	0.0414805	-0.0216251	-0.0163639	-0.00068853	0.0172619	0.00185233	0.0102832	0.0100725	0.0228552	0
140.2	-0.000674489	0.0376584	0.0119619	0.000146283	-0.00657079	0.0189742	0.0140199	-0.0156896	-0.00717983	-0.0024613	0
140.4	0.00159646	-0.0370635	0.0349189	0.0505954	-0.00979521	0.00349548	-0.0463362	-0.0114671	0.020412	0.0212859	0
140.6	0.00767249	0.0345256	0.0415715	-0.0230977	-0.00565181	0.00529093	-0.0270012	-0.0123738	-0.00687312	-0.0161643	0
140.8	0.0198847	0.0331907	0.00212994	-0.0274449	-0.0456236	-0.0261275	0.0322231	-0.00435988	-0.0132093	-0.00712401	0
141	0.0172071	0.00731123	-0.0519071	-0.0252695	-0.00766182	-0.060966	0.0784212	0.0283952	-0.00665674	-0.00655013	0
141.2	-0.00168126	0.00849599	-0.025688	-0.00144252	0.0125657	-0.0240973	0.0115267	0.0298721	-0.0086644	-0.00544159	0
141.4	-0.00546929	0.0177747	0.0107752	0.0110049	-0.0164718	0.00343036	-0.00324924	-0.0284067	0.00861116	-0.00567081	0
141.6	-0.000412743	-0.00919156	-0.00539259	-0.015701	-0.00681065	-0.00359513	0.0164496	-0.0402957	0.0246003	0.00170256	0
141.8	-0.0110724	-0.0386247	-0.0029385	-0.0105534	0.0194135	0.0193851	-0.0768429	0.0258862	-0.0101482	0.016173	0
142	-0.00812602	0.0161627	0.0129871	0.0269966	-0.0241915	-0.00755832	-0.0100551	-0.00237903	-0.031365	-0.0263237	0
142.2	-0.0188582	-0.0147194	0.0070554	0.00459906	-0.00298002	0.0153042	-0.0193249	0.0200036	0.00321052	0.00911002	0
142.4	-0.0115583	-0.0584397	-0.0187216	-0.0312848	-0.00759655	0.0258806	-0.0466676	0.00691707	0.0303696	0.013456	0
142.6	-0.00894034	-0.00931272	-0.0452586	-0.00296045	-0.0224265	-0.014696	-0.0207892	0.0125235	0.0336963	-0.000846384	0
142.8	-0.0109267	0.00569239	-0.0272157	0.0616114	0.00174576	-0.030413	0.0286674	0.028551	-0.0146471	-0.0141142	0
143	0.00386615	-0.0510027	-0.0141399	0.0469779	0.0211094	0.00510173	0.0276732	-0.0113864	-0.0475942	-0.0281468	0
143.2	0.0138971	-0.0115178	-0.0623571	-0.0386036	0.0119055	0.0278834	-0.00622029	-0.0229328	0.0191942	0.00783063	0
143.4	0.00993993	0.000435946	0.00686333	-0.0044728	0.0324683	0.0551164	0.0728163	0.0173567	-0.0247151	0.0298169	0
143.6	-0.0213108	0.00385772	0.0352897	-0.00927759	0.0251581	0.00178362	0.0248172	0.00495178	-0.043432	0.0147605	0
143.8	0.00231313	0.0450679	-0.00152391	-0.0355932	0.0190255	-0.034477	-0.00974847	0.0130495	0.00795896	-0.000584267	0
144	0.007848	0.0211947	0.0212019	-0.0210275	0.0171065	-0.0126173	-0.000583116	-0.00677299	0.0205424	-0.0117738	0
144.2	-0.0208994	-0.0337542	0.0650971	-0.0135945	0.0207671	-0.01849	0.0286012	-0.0319758	0.00216327	-0.00439749	0
144.4	0.00215414	-0.0173373	0.0460207	-0.0385838	0.0244624	-0.0464348	0.0587596	0.0115558	0.00982562	0.00349932	0
144.6	0.0220065	-0.0166777	0.0534628	-0.0221405	-0.0171717	0.000792364	-0.0240712	0.000214482	-0.0247356	-0.043727	0
144.8	0.0111245	0.0457711	0.000495181	-0.00538275	-0.0308839	-0.0116244	-0.0191978	-0.0256712	-0.0110914	-0.0168522	0
145	0.00256397	0.0156541	0.011155	0.0234659	-0.0216625	0.00807098	-0.0348952	-0.0658857	-0.0211268	0.0129212	0
145.2	-0.00481963	0.00970041	-0.0206745	-0.0349587	-0.0465277	0.00499038	-0.0276943	-0.0390871	0.0041855	0.0174767	0
145.4	-0.0270743	0.05268	-0.0485082	-0.0135594	-0.0390183	-0.00925757	0.00886819	0.0131037	0.0377561	0.00485639	0
145.6	-0.0264932	0.0166375	-0.0131839	0.0814007	0.0036179	0.00188442	0.0195086	0.00487526	0.0348983	4.74017e-05	0
145.8	0.00731291	-0.0506882	-0.0121185	0.0168603	-0.00543708	-0.00585432	0.00993952	-0.0106417	0.0149979	0.0172299	0
146	-0.0144082	-0.00394177	0.0167893	0.0300762	0.0150999	0.00120062	-0.0307112	0.016559	-0.0566967	0.00457504	0
146.2	-0.010552	-0.0100898	-0.027012	0.0316799	-0.00390709	-0.0244132	-0.0450476	-0.00347657	0.035156	-0.00244105	0
146.4	-0.0214011	0.000419388	-0.0426713	0.0241759	-0.00369081	0.0146839	-0.0392227	0.0199802	0.0190848	-0.0102511	0
146.6	-0.000143733	0.0179237	-0.029277	-0.0293065	0.00287373	0.0226253	-0.0140144	0.0378246	-0.0151905	0.00381788	0
146.8	0.0284529	-0.0088671	0.00413192	-0.041568	0.00298966	-0.00553591	0.020488	0.0376602	0.014951	0.00374816	0
147	0.00712964	-0.00859366	0.0361575	0.013018	-0.00353545	0.014461	0.0319893	0.0396675	-0.00136717	-0.0119165	0
147.2	0.0119188	0.0500491	-0.0103544	-0.0215424	-0.0290507	0.0117201	0.0173755	-0.0133158	-0.0162407	0.0274122	0
147.4	0.0393007	0.00354099	-0.0117699	-0.0128703	0.0154688	-0.00194061	0.0116547	-0.00838256	-0.00294019	0.0164068	0
147.6	0.0307512	0.00303267	0.0526252	-0.0270327	0.00289986	8.22344e-05	0.00611164	0.00877255	0.0283572	0.00906995	0
147.8	-0.022251	-0.00487669	-0.0336819	0.0280346	-0.00102268	0.00906708	0.0350747	0.0234342	0.0133247	-0.00116023	0
148	-0.0202631	-0.0139739	-0.0282237	0.0277742	0.0155323	0.00177208	0.00573074	-0.000132339	-0.00472297	-0.0327563	0
148.2	0.0163081	0.0117564	0.0950929	-0.0206498	0.0277858	-0.0101023	-0.027001	0.0098326	0.0115305	-0.0222094	0
148.4	0.00431649	0.0145552	0.0245503	0.0381904	0.0253764	0.00056659	0.0243668	0.0567928	0.0152821	0.0241484	0
148.6	0.0247047	-0.00490158	-0.0374362	0.0360596	-0.0299689	0.0160023	-0.0136458	-0.0468524	0.00264618	-0.0156559	0
148.8	0.0184321	0.0106608	0.00807222	0.00631911	0.00752137	0.0153265	0.0279423	-0.0322893	-0.00705483	0.000262966	0
149	-0.00772043	-0.0153877	-0.0153919	0.0151671	-0.00186269	0.0477395	-0.00278943	-0.0147584	-0.0240031	0.033508	0
149.2	0.00174501	-0.00745817	0.015911	0.0189244	0.015408	0.0352746	-0.0116685	-0.071611	-0.0196933	0.0153451	0
149.4	0.01143	0.00014876	0.0748913	-0.0279843	0.0386207	-0.00346796	0.0123017	-0.0458281	-0.0143969	0.00890329	0
149.6	0.00415389	-0.0169423	0.0376017	-0.0307404	0.00324626	0.00579489	-0.00800219	0.0447795	-0.0135724	0.00931621	0
149.8	0.0174491	0.0234829	-0.0203158	0.0425108	-0.00829436	0.0217299	-0.00812626	0.00981818	0.00976476	-0.0382229	0
150	-0.0130986	0.0050795	-0.0590425	-0.0165746	-0.0240965	0.00826485	-0.000662869	0.00498278	-0.00307077	0.0100285	0
150.2	-0.0112722	0.00249613	0.0449862	-0.0118452	-0.00450487	-0.0192895	-0.0127094	0.0185355	0.0119532	-0.019445	0
150.4	-0.0169878	-0.0192363	0.0208862	-0.0480987	-0.0112516	-0.0175221	-0.015209	0.0121851	-0.0232426	-0.0268113	0
150.6	-0.0215964	-0.0482987	-0.0391763	-0.0793323	-0.00037433	-0.0196484	-0.00476753	-0.0117048	-0.0252707	-0.000147878	0
150.8	-0.0112397	-0.0237189	-0.0438819	-0.0366885	0.0190188	-0.0329614	-0.00947284	0.00944267	0.0312116	0.0172174	0
151	-0.00379485	0.0348552	-0.0626449	0.0223816	0.00832898	-0.0198517	-0.0215244	0.0471696	0.0435632	0.0260468	0
151.2	0.0133264	0.0301514	-0.00171074	0.0624368	0.0277613	0.00573237	0.0104974	-0.00862416	0.0314337	0.00088312	0
151.4	0.0215581	-0.035438	0.0602274	0.0263692	-0.00268682	0.011886	0.0699706	-0.017805	0.0416418	-0.0165592	0
151.6	-0.0119234	0.0154898	0.0201087	0.0165534	-0.0335602	-0.0225907	0.0340295	0.0267553	-0.00259138	0.00684017	0
151.8	-0.0136807	0.0553117	-0.00945409	-0.0183148	-0.0135606	-0.00056605	0.0182199	-0.00368582	-0.0308988	-0.0182694	0
152	0.000718437	0.026758	0.0110655	-0.0479079	0.0144474	0.0203483	0.0196437	-0.032571	-0.0332	-0.0362844	0
152.2	-0.00389615	-0.0409288	0.0155377	0.0183478	0.00641041	-0.00311325	-0.0167757	-0.01679	-0.0265811	-0.00317493	0
152.4	0.000793024	-0.0832513	-0.0113827	0.0843407	-0.0176586	0.00316425	-0.0233919	-0.0165623	0.00942867	0.00870825	0
152.6	-0.00283193	0.0323998	-0.0309174	0.000567092	-0.0353537	0.00675773	0.0015638	0.0431194	0.0138109	0.021248	0
152.8	-0.00811718	0.0359634	-0.0153834	-0.0118192	-0.0285712	0.0220852	-0.0125201	-0.00998076	-0.0228239	0.0160229	0
153	0.00384465	-0.00353034	-0.024931	-0.0100917	0.0186703	-0.000649932	-0.00145893	0.0314185	-0.0133003	0.0132825	0
153.2	0.00766868	-0.0406103	-0.0363564	0.00767538	0.0256005	-0.0179622	-0.0271445	0.0293417	-0.0255738	0.0131569	0
153.4	-0.0148824	-0.0274622	0.000271336	0.0233118	-0.00222733	-0.0264712	-0.0306462	-0.0138288	-0.0300996	6.66437e-05	0
153.6	-0.0208968	0.0281516	0.0204463	-0.0203072	0.00736234	-0.0194073	0.0126897	-0.0014835	0.0131395	-0.0202824	0
153.8	0.00960018	0.0119948	-0.0307985	-0.059876	0.0340949	0.0200721	-0.0221412	-0.047788	0.0118538	-0.0198459	0
154	-0.00429435	-0.0235024	-0.00614477	-0.00655129	0.0289082	-0.0414076	-0.00902439	-0.0323581	0.0178404	0.0049805	0
154.2	-0.0039591	-0.0131973	0.0246802	0.0377048	0.00319905	-0.0298192	-0.0174701	-0.0118131	-0.00988938	-0.00402287	0
154.4	-0.00458367	0.00843231	-0.000551017	0.00500502	-0.0183652	0.00577719	0.0182661	0.00475988	-0.00602558	-0.0157546	0
154.6	-0.00238682	-0.0120489	-0.00868646	-0.0357025	-0.00907349	-0.0128769	0.0226902	0.0330457	0.0215962	-0.00129138	0
154.8	0.00274701	0.00349964	0.00616357	-0.0216768	0.0111752	-0.012171	-0.00404622	0.0314231	0.0189579	0.0201319	0
155	-0.00521939	0.0488754	0.00398856	0.00959619	0.00253918	0.0484401	0.0181334	-0.00381953	-0.00393165	0.017454	0
155.2	-0.0105525	-0.0152862	0.0192481	0.0113125	-0.0094239	0.0542497	0.00273592	0.0193997	-0.00529533	-0.000387013	0
155.4	-0.0194659	0.0503058	-0.0366274	0.00649161	0.0177778	0.0136202	0.00590696	0.0585898	0.0137013	0.0158843	0
155.6	0.016795	0.0367795	-0.0021599	-0.0134083	0.00185126	-0.0292626	0.0593162	-0.0190483	0.00369356	0.00222712	0
155.8	0.0427853	-0.0330849	-0.0109748	-0.0151817	-0.0341867	-0.026388	0.0433422	-0.0697264	-0.00707985	-0.0180442	0
156	0.0188089	-0.0335891	-0.0352676	0.0228508	-0.0187727	0.0346041	-0.0147089	-0.0383747	-0.00107848	-0.00350493	0
156.2	-0.00568742	0.0103803	0.0148641	0.0511156	0.0113014	0.0490389	-0.027105	-0.0260324	0.00322409	0.0226741	0
156.4	0.00732767	0.0116093	0.027963	0.00721572	-0.00287354	-0.0224542	-0.0214758	-0.0334736	0.00521576	0.0164344	0
156.6	0.00874808	-0.0101533	0.0168895	-0.0546757	0.00570864	-0.00480185	-0.0147638	0.00587548	0.0161867	-0.00729344	0
156.8	-0.0169248	0.0170761	0.0889777	0.00537396	-0.0100411	-0.0263448	-0.0253086	-0.0185928	0.0136893	0.00803781	0
157	-0.0198079	0.019645	0.0258229	0.0394457	-0.0241548	-0.0271171	-0.0311986	0.0196847	-0.0310493	-0.0271991	0
157.2	-0.012423	-0.00724146	-0.0323397	-0.0371787	0.00104403	-0.00382729	-0.029043	0.0570522	-0.0374468	-0.0194127	0
157.4	-0.0162524	-0.0284345	-0.00684112	-0.0603768	0.0170961	0.00162143	0.00076863	0.0112772	0.0188362	0.0135812	0
157.6	-0.0029024	-0.030917	0.00013428	-0.00376657	0.00923534	0.00571472	0.039905	-0.00167632	0.0391591	-0.00562925	0
157.8	0.0253647	-0.00714096	-0.00288553	-0.0349173	0.0271621	0.0201465	0.0224176	0.062892	0.000347352	0.00103949	0
158	-0.00468257	0.020557	-0.0746746	0.0174451	7.05058e-05	0.00672214	-0.00354688	0.00666528	0.0188045	-0.0159559	0
158.2	-0.00703305	0.0342946	-0.0346528	0.0158532	0.0115386	0.027459	-0.00423588	0.0407387	-0.0407511	0.0261601	0
158.4	0.0123697	0.0240943	-0.00709929	0.0661046	-0.0282851	0.0109112	-0.034827	0.0143387	-0.0320751	0.0166401	0
158.6	0.0202997	-0.0135217	0.0011883	0.0355951	-0.0319251	-0.0115868	-0.0249528	-0.0167873	0.0137223	-0.0158587	0
158.8	0.0116678	-0.00823762	0.0246805	-0.0374702	-0.0005504	0.00593796	0.032233	0.00217422	0.0288805	0.00235813	0
159	0.0042013	0.0331619	0.0239907	0.0484391	-0.0307212	0.00505169	0.0247189	-0.0262536	0.0458077	0.0240883	0
159.2	0.0184817	-0.0175859	0.0500938	0.0729976	0.00979843	-0.0180144	-0.0198096	-0.00274975	0.0015866	0.0192988	0
159.4	0.0198276	0.00559872	0.0493344	0.0264774	0.0203456	0.0171316	-0.0126821	0.0435765	-0.0101668	-0.00273468	0
159.6	-0.0051123	-0.00795672	0.0413714	-0.00326139	0.0156348	0.00145267	0.0180051	0.0506929	-0.0085738	0.00555038	0
159.8	-0.0214306	-0.00925934	0.0292192	-0.0314446	0.0187458	-0.0369579	0.0335337	-0.0107648	0.00394382	0.00900214	0
160	0.00864657	-0.0121589	0.00976686	-0.0372344	-0.00244342	-0.0140951	0.0323006	-0.0463625	0.00411382	-0.00689392	0
160.2	0.02478	-0.0185077	0.00127031	-0.010013	-0.0235097	0.022623	0.0161491	-0.0168868	-0.0164348	-0.00835374	0
160.4	-0.0224281	0.0146394	0.0305984	-0.00505604	0.0172569	-0.00421894	-0.0117983	-0.00219883	-0.0108187	0.00959523	0
160.6	-0.00948692	-0.056445	0.0710745	-0.000559456	0.0411659	-0.0107277	-0.0145058	0.00982427	0.0178386	0.00985086	0
160.8	0.000402146	0.0130029	-0.0197193	-0.00455157	-0.0130669	0.0264744	0.0130961	-0.0221643	0.0135747	-0.025054	0
161	-0.0151852	-0.00624082	-0.0907892	0.00307506	-0.0200066	0.0492172	0.00934766	-0.0505681	-0.0209801	-0.011805	0
161.2	-0.0133236	-0.0217287	-0.0558208	0.0101689	-0.0229728	0.00995102	-0.0161677	-0.0590033	-0.0339385	-0.0092491	0
161.4	-0.00590751	0.0221926	0.0013807	-0.0265607	-0.0223639	-0.0266146	-0.00190483	-0.0335081	-0.00709695	-0.0221756	0
161.6	-0.0171919	0.00703836	-0.0237219	-0.0487003	0.0194588	-0.0076066	-0.00453971	0.0308933	0.0280373	0.00768419	0
161.8	-0.00647453	0.0185128	-0.0825035	0.0252878	0.0113701	0.00690101	-0.0717607	0.0720238	0.0374147	0.0164009	0
162	0.0106586	0.032989	-0.0026086	0.0179555	0.01586	0.0162752	0.0244476	0.0508842	0.00597257	-0.0103871	0
162.2	0.00596991	0.00712421	-0.0184086	-0.0259802	0.00671437	-0.0301316	-0.00567253	0.00479685	-0.0351591	-0.00925226	0
162.4	0.00474033	0.0457486	-0.01489	-0.0143542	0.00187263	-0.0353588	-0.0317281	-0.0142843	-0.020399	-0.0161602	0
162.6	0.0120213	0.0283985	0.0540618	0.0153186	-0.000279537	0.00449032	0.0153043	-0.0152322	0.00797296	0.00682733	0
162.8	-0.00410105	-0.0440035	0.064868	0.0144946	0.00598517	0.0129518	0.00449061	-0.0342536	0.0197653	0.0269756	0
163	-0.0220856	-0.011562	0.0185783	0.00655015	0.0167082	-0.000890581	-0.0377827	-0.0549803	0.0277064	-0.0194189	0
163.2	0.0172734	-0.0099304	0.0281456	0.00149273	-0.0116408	0.00203305	0.0181929	-0.0162772	-0.00800485	-0.00332285	0
163.4	0.0151677	0.0145937	0.0463825	0.0185759	0.0175152	-0.0228538	0.0136863	0.0610607	0.00178982	0.0171089	0
163.6	0.0143733	0.036946	-0.0222024	0.0407394	-0.0129052	0.0449987	0.0281229	0.0404337	-0.0466811	0.0251413	0
163.8	0.0172477	-0.0124999	-0.0770255	0.0604059	-0.0242996	0.0233671	0.0382869	-0.00926219	-0.0189032	0.00399917	0
164	-0.00505208	-0.0470625	-0.0271247	0.0178959	-0.00376714	-0.028681	-0.00249259	0.00712704	0.0187896	0.0104056	0
164.2	-0.00433299	-0.019083	0.0286013	-0.0377598	-0.00281635	0.00865851	-0.00772636	0.00666015	-0.0255551	0.0370456	0
164.4	0.0365662	-0.00419862	0.00373457	-0.00428553	0.0210513	-0.00992216	0.0515733	-0.0466365	0.0159905	0.00324932	0
164.6	-0.00956392	0.0569832	0.0120265	-0.0407084	0.0164818	0.00543995	0.0108751	0.0294974	0.0628262	0.00479163	0
164.8	-0.00805912	-0.00441207	-0.0449567	-0.0608826	0.0168513	-0.0165207	0.0108634	0.0106253	0.024483	-0.0147586	0
165	0.00318627	-0.0200673	-0.0021523	-0.0471092	0.0214278	-0.0155852	-0.0239951	0.00576885	-0.0140086	-0.00640419	0
165.2	-0.000630542	0.00863349	0.0759166	-0.011577	0.00193833	0.00995077	-0.0277812	-0.00352642	-0.01832	-0.00715932	0
165.4	-0.00298611	-0.0205017	0.0364035	0.0141521	-0.0232938	0.012991	0.0169201	-0.0140888	0.00191815	-0.0156947	0
165.6	-0.00153083	-0.0328541	-0.0205021	-0.014761	-0.0099452	0.00347061	0.0264197	0.0198627	0.025358	0.0156091	0
165.8	0.00809492	0.0450583	0.0424328	-0.0557243	0.0115611	0.0158675	0.0418993	-0.00314307	0.00103175	0.0232496	0
166	-0.00167485	0.0472071	0.044882	0.00703659	-0.0349867	0.0350862	0.0110902	0.0317999	-0.0301127	-0.00205607	0
166.2	-0.0122952	-0.00785612	-0.0100095	0.0357575	-0.0343162	-0.000303237	-0.0308613	-0.00811424	-0.0252725	-0.0248584	0
166.4	-0.0125753	-0.0136228	-0.052103	0.0653897	-0.00969986	-0.00252138	-0.0383553	0.0118367	0.0150885	-0.013584	0
166.6	0.00949388	-0.00571667	-0.0226255	0.0591114	0.00695527	0.0183413	-0.00131085	0.0135564	0.0175288	0.0193894	0
166.8	0.0264003	0.0052714	-0.013661	-0.00841618	-0.011109	-0.00551652	0.0151521	-0.0288172	-0.0100592	0.0255826	0
167	0.00369937	0.0494743	-0.0813663	-0.0177591	-0.0483553	-0.0394343	-0.0185535	0.00819066	0.010581	-0.00715288	0
167.2	-0.0214675	0.000314222	-0.0246377	0.0361972	0.0103763	-0.0322747	-0.0122981	-0.0425955	0.0166338	-0.0157316	0
167.4	-0.0489347	-0.0511679	0.0177463	0.0422886	0.0122821	0.00604875	-0.0402296	0.033176	-0.0394349	0.0148168	0
167.6	0.00427658	-0.0204514	-0.0155018	0.0548481	0.0148843	0.00688016	-0.0199798	-0.0167899	-0.0318099	0.00123951	0
167.8	0.0123209	-0.00419204	-0.0141442	0.0159137	0.0220822	0.0139577	0.00876309	-0.0416237	0.0131682	-0.0212159	0
168	-0.00909556	-0.0174009	-0.00184802	-0.0563793	0.0266695	0.00216918	0.00391141	-0.0131073	0.012857	-0.0242618	0
168.2	0.0248117	-0.0086234	-0.00375519	-0.0492938	0.0211018	-0.0266163	0.00381812	-0.0388135	-0.00892628	-0.0162163	0
168.4	0.0192143	-0.0151102	0.0615249	-0.0119626	-0.0198937	0.02589	0.0104834	0.0105826	-0.0100158	0.00784774	0
168.6	0.00884275	-0.0131054	0.0382721	-0.062261	-5.80241e-05	0.0352024	-0.0159051	0.00945695	-0.0361986	-0.0134358	0
168.8	-0.00825628	-0.00604607	0.00656673	-0.00346753	0.047352	-0.00865464	-0.0730313	-0.0128305	-0.0338139	-0.0150463	0
169	-0.0180966	0.00740693	0.0349088	-0.00203894	0.0189434	-0.0156894	0.0055595	0.00272206	0.0104107	0.00372627	0
169.2	-0.0175502	0.0272106	0.0383571	0.0133999	0.00404407	0.00766005	0.0509313	0.0100078	0.00940995	-0.000630543	0
169.4	-0.0110246	0.0203821	-0.025299	0.0602704	0.006812	-0.00229399	-0.00837427	0.0171574	0.00887442	-0.0103903	0
169.6	-0.00227326	-0.0159198	-0.0576388	-0.00807567	-0.0404935	-0.0428452	0.00960781	0.0306281	0.0376371	0.0122466	0
169.8	-0.00902743	-0.0142622	-0.023839	-0.0471874	-0.0182891	-0.0419096	0.0558468	-0.0284816	-0.0329292	0.0197325	0
170	-0.0292605	0.0134661	-0.0508267	0.00793125	0.00102333	0.0351876	0.0461399	0.00945115	0.0290841	-0.0208897	0
170.2	0.0155976	0.0225026	-0.0236432	0.0338655	-0.0134106	0.0372066	0.0334181	0.0180062	0.00492927	0.0119575	0
170.4	0.00335495	0.00488187	0.0280402	0.0222955	-0.0152134	-0.0308761	0.0226796	-0.00470505	-0.0279864	0.0235897	0
170.6	-0.0346025	-0.0352614	-0.0145846	-0.0131032	-0.0121369	-0.0421296	0.00504396	-0.0214205	0.0124978	-0.00619177	0
170.8	-0.0024448	-0.0497335	-0.0417072	-0.0457737	-0.0220437	0.0152556	-0.0206858	0.00870043	0.0177837	0.00492227	0
171	0.0184865	-0.0123792	0.0392216	-0.0279955	-0.0115933	0.02328	-0.0433076	0.0515353	-0.0323801	0.0304753	0
171.2	-0.00665456	-0.0071088	-0.0296834	-0.0126018	0.0124645	-0.0261934	-0.0271722	-0.0480344	-0.00792275	0.00566332	0
171.4	0.00942275	0.0311503	0.0116383	-0.0191125	0.0185525	-0.00264257	-0.0371781	0.00368782	0.0224523	-0.0261044	0
171.6	0.00954422	0.0371145	0.0503445	0.0356668	0.0345091	0.0286326	-0.01153	-0.019169	-0.00544041	-0.00492384	0
171.8	-0.0086985	-0.00657577	0.0513011	0.0147113	0.00244559	0.0262516	0.0108657	-0.0198453	-0.00998719	-0.00250029	0
172	0.00186539	-0.0281697	0.0232542	-0.0377993	-0.0111298	0.00996097	-0.0139056	0.0374345	0.00815612	-0.0162721	0
172.2	0.0253341	0.0105483	-0.00362854	-0.000242936	0.036835	-0.00621295	-0.00984909	0.0237276	-0.00501686	-0.00076239	0
172.4	0.0272676	0.0404542	0.0482184	-0.0163753	0.00175092	-0.0226522	0.0438988	0.0226067	0.000230984	-0.00672658	0
172.6	0.0481173	-0.00546972	0.0270525	-0.0409584	-0.0259897	-0.0375342	-0.0105589	-0.0119773	0.00645507	-0.00124896	0
172.8	0.016532	0.00883091	0.0346016	0.0381534	0.0218638	0.00586275	-0.0343015	-0.0203836	0.0119279	-0.0135435	0
173	-0.0202235	0.0131361	-0.0108431	0.0439939	0.0362692	0.0151516	-0.0116197	-0.000837985	-0.00524317	0.0014732	0
173.2	-0.0176433	0.000596341	-0.0323349	-0.0100714	0.00509431	-0.0293482	-0.00873499	0.00241005	-0.0123439	-0.000100061	0
173.4	-0.00438725	0.0279004	0.00332829	0.0113876	-0.0231065	-0.0404317	-0.0100305	-0.0259289	-0.00595908	-0.0151885	0
173.6	-0.012412	0.0167555	-0.0404597	0.0585055	-0.0343369	-0.00118473	0.0122795	-0.0335767	-0.00841616	0.00543588	0
173.8	-0.0260753	-0.0734665	-0.0952291	0.0220965	-0.00320189	0.0110874	-0.00286149	0.0137259	0.0137902	-0.0118151	0
174	-0.0154993	0.021208	-0.0212776	-0.02455	0.00367177	0.0195383	-0.0171987	-0.00668545	0.000203328	4.57743e-05	0
174.2	0.016524	-0.0015455	-0.0398206	-0.0130597	-0.0248565	0.0286719	0.0357251	-0.0171459	0.0031783	0.0111331	0
174.4	-0.00897658	-0.0601109	-0.0523246	0.0262707	-0.0099415	-0.00397201	0.0236808	-0.00111374	0.0217561	0.00143609	0
174.6	-0.0332099	-0.00875321	0.0187498	0.0100896	0.00578878	-0.0122876	-0.00500119	-0.0167821	-0.00252335	0.00220665	0
174.8	0.00564315	0.0316543	0.0425979	-0.039121	-0.0222935	0.0283977	0.0217069	-0.0118296	-0.028012	0.01368	0
175	0.0118926	-0.0158654	-0.00253521	-0.0328096	-0.0183727	0.0169581	0.00631435	0.067805	0.0094861	0.00447038	0
175.2	-0.0303085	-0.0115918	0.0180163	-0.0286839	-0.00381578	-0.0167154	0.0289435	0.0544843	0.00303174	0.00844808	0
175.4	-0.0305436	0.0128925	0.0246694	-0.0304178	-0.0097804	-0.0302877	0.0407178	0.0239564	0.02935	0.0260625	0
175.6	0.0196372	0.00731626	0.0457553	-0.0185345	0.0146927	0.0159736	-0.0173691	-0.00586108	0.0109698	0.000471691	0
175.8	0.0140686	0.0152553	0.06859	0.0221086	0.00219781	0.0162535	-0.0427009	0.0195616	-0.00579567	-0.0190101	0
176	-0.0203342	0.00466995	0.0204823	0.0255316	-0.0164164	-0.0175076	-0.0174798	0.0150576	0.00491502	-0.0200966	0
176.2	0.00354067	-0.0161391	-0.042534	-0.0124812	0.00942577	0.00450842	-0.0206369	-0.0525576	-0.00315234	-0.0214564	0
176.4	0.0216337	0.0491804	-0.0094711	0.0191547	-0.0168794	0.0124371	-0.0102674	-0.00738048	0.00904732	0.0153771	0
176.6	0.024629	-0.00521765	-0.0326118	0.0255264	0.0122942	0.0103062	0.0206231	-0.00278313	0.017552	0.00399909	0
176.8	0.00169615	-0.0111119	-0.0126071	0.00261219	-0.00211104	0.00177497	-0.0395837	-0.00470171	-0.024681	-0.00346746	0
177	0.0128905	0.0472335	0.00193132	-0.0187545	0.0283799	0.00213285	-0.0087087	-0.0170448	-0.0156665	-0.0172243	0
177.2	0.0310165	0.0622234	-0.0101517	0.010176	0.0374446	0.0114665	0.032856	-0.0199089	0.0190479	-0.0229064	0
177.4	0.0150286	0.00999848	0.00658231	0.0345292	-0.019744	0.00990876	-0.0279006	-0.007684	0.00669298	0.0089337	0
177.6	0.00883468	-0.0378726	0.0296994	0.0030036	-0.00694251	0.00244223	-0.0230398	-0.00288482	-0.0136883	0.0384477	0
177.8	0.022838	-0.0425378	0.00134652	0.0152517	0.0422386	0.020712	0.0636215	0.0275045	-0.0115255	0.010435	0
178	0.0003799	-0.0462917	0.006181	-0.045506	0.0215869	0.0231968	0.03242	0.0283027	0.0120049	-0.0324365	0
178.2	-0.0122458	-0.00778265	-0.020914	0.0197072	-0.00358979	-0.0120694	0.0185676	0.00765537	-2.44359e-05	0.00316635	0
178.4	-0.0128042	-0.019306	0.0104137	0.0459838	-0.000465725	6.13775e-06	0.00338452	-0.0230845	1.53014e-06	0.01655	0
178.6	-0.0194701	-0.015901	-0.000730007	-0.0459696	0.0066526	0.0133484	-0.00723645	-0.0135829	0.00152934	0.00340554	0
178.8	-0.0218982	0.0262277	-0.0740131	-0.0698052	-0.00504688	-0.025647	-0.00459462	0.0262453	-0.0217354	0.00461748	0
179	-0.0145588	-0.0359411	0.00164392	9.54864e-05	-0.0221987	-0.0135234	-0.0344445	0.00854776	-0.00181024	-0.0256535	0
179.2	-0.00876656	-0.0256848	0.0056567	0.0126464	0.000269378	0.0239706	0.047897	-0.0124254	0.0335012	0.0140703	0
179.4	0.0160746	-0.00920749	0.0260745	-0.00245955	0.00958034	0.0017464	-0.0194698	0.0104859	-0.00674594	0.0220506	0
179.6	0.00888504	0.0204229	0.0230512	0.018575	-0.018314	0.00291	-0.0127521	0.0381054	0.00601109	0.0318547	0
179.8	-0.0191462	0.041606	0.0176351	0.0284275	-0.0236822	-0.0123115	0.00628479	0.0101728	0.0137338	0.0145353	0
180	-0.0217556	0.0340001	0.0364458	-0.000725135	0.00475399	-0.0399915	-0.00568534	-0.0165457	-0.0204026	-0.00571097	0
180.2	-0.00841023	0.00639808	0.00517839	-0.0058913	0.00647569	-0.0195112	0.0488349	-0.00492547	-0.00575386	0.0140786	0
180.4	-0.00654376	-0.033173	-0.0569971	0.0184904	-0.0169051	-0.0134433	0.013182	-0.0397352	0.0034345	-0.0134017	0
180.6	0.0111327	-0.000861199	0.0326533	-0.0235787	-0.00918465	0.0401915	-0.00131431	-0.0180483	-0.0356999	-0.00866846	0
180.8	0.0120936	-0.00164211	0.0338341	-0.0268974	-0.0171478	0.0227353	0.00884444	-0.00974216	0.00465795	-0.0138753	0
181	0.0117953	-0.0218189	-0.0113595	-0.00111046	0.00122069	-0.00574508	0.0291916	-0.0225306	0.000267532	-0.0193074	0
181.2	-0.0163002	0.00237152	-0.00852261	0.031649	0.0259828	-0.0169421	-0.0116739	0.0177073	-0.0113028	0.0123491	0
181.4	-0.0238054	0.0468151	-0.013289	0.0384696	0.0134939	-0.0369724	-0.0559067	0.0404586	0.0260895	0.0148888	0
181.6	0.0342664	0.0400212	-0.0325123	-0.0115714	-0.000273249	-0.0216044	-0.00968232	-0.016916	-0.00308369	-0.0416811	0
181.8	0.00362456	-0.00390962	0.0134995	-0.0110364	0.00836309	0.0354096	-0.0406229	0.0367591	-0.0352394	-0.00595694	0
182	0.0302295	0.0136565	-0.00756013	0.0469035	0.0320731	0.0460718	-0.044019	0.0262801	-0.00991642	0.0107353	0
182.2	0.0209384	-0.000819969	0.0248508	0.0236914	-0.0191357	0.000816112	0.0123356	-0.00628611	0.0618587	-0.00605646	0
182.4	0.0316136	0.00641233	0.0418455	0.00548069	-0.0174653	-0.00828897	0.0383613	-0.00127248	0.0541495	0.0108605	0
182.6	0.0563484	0.0412191	0.0363433	-0.00695547	0.0407948	0.0103834	0.0105832	-0.00432031	0.0157968	0.0307932	0
182.8	0.0316318	0.0214962	0.051638	-0.0367976	0.0282962	0.00636298	0.0167728	0.00717921	0.0139271	0.014187	0
183	0.0334216	-0.0066613	0.00966221	0.0324295	-3.52848e-05	0.0168745	0.0675823	0.0744142	-0.0222544	0.0115262	0
183.2	0.0326945	0.0181405	0.0272975	0.0458314	0.0334081	0.0249584	0.0251869	0.0068141	0.0348961	0.00239442	0
183.4	0.0462187	0.0216284	0.0317231	0.0187228	0.0780228	0.0667901	-0.0110677	-0.0214944	-0.00554844	0.0463681	0
183.6	0.0377355	0.0617914	0.0274685	0.0487541	0.0455294	0.0424371	0.00898163	0.00540493	-0.00098103	0.0564752	0
183.8	0.0293166	0.0550258	0.0457377	0.0496052	0.0111244	-0.014369	-0.00271507	0.0417469	0.0256041	0.0592337	0
184	0.0309618	0.0352915	0.0544793	0.0196123	0.0404113	-0.00363186	0.0220093	0.0813124	0.0202443	0.0589578	0
184.2	0.0276064	0.0857002	0.0323106	0.0676064	0.0583673	0.0426201	0.101517	0.094094	0.0411059	0.0129743	0
184.4	0.0530876	0.0325963	0.0296324	0.0870737	0.025581	0.0344485	0.00209999	0.0542764	0.0192536	0.0152939	0
184.6	0.047938	0.0297589	0.0327891	0.0102939	0.0241576	-0.000214132	0.0111558	0.0496155	0.0231932	0.0265287	0
184.8	0.0266214	0.0240184	0.0188322	0.00468711	0.0576204	0.0232497	0.0277566	0.0281138	0.0245329	0.0743244	0
185	0.0338818	-0.00633603	0.0292708	0.0862732	0.0395466	0.0234166	0.0628312	0.00349323	0.0498296	0.0833241	0
185.2	0.047035	0.0199861	0.0470381	0.0789573	0.0212385	0.0174791	0.0572127	0.0251028	0.0737231	0.059373	0
185.4	0.0355607	0.0669337	0.0549049	-0.00841299	0.0460894	0.0494102	0.0533286	0.074439	0.0568458	0.0684381	0
185.6	0.0348631	0.0450379	0.0937118	0.01271	0.0386485	0.0517456	0.154184	0.0826763	0.0510771	0.0847741	0
185.8	0.0632017	0.0850823	0.12162	0.0587527	0.0410286	0.0480917	0.0846883	0.0461919	0.082674	0.0782038	0
186	0.06352	0.131077	0.0917646	0.0574195	0.0599469	0.0501157	0.103261	0.0703766	0.0739508	0.0899257	1
186.2	0.0845416	0.155365	0.137471	0.059127	0.0699673	0.102122	0.151478	0.082028	0.0771934	0.0940326	1
186.4	0.0969472	0.107623	0.114993	0.056883	0.10234	0.0919214	0.119374	0.107121	0.111215	0.102903	1
186.6	0.101322	0.0795299	0.108647	0.0437318	0.111629	0.0725405	0.132986	0.134913	0.13493	0.118914	1
186.8	0.117691	0.127102	0.204226	0.0769889	0.0666106	0.104059	0.199612	0.120061	0.109444	0.107678	1
187	0.0881477	0.106992	0.130158	0.15717	0.0619065	0.0290242	0.10616	0.122476	0.0597891	0.079323	1
187.2	0.0552969	0.0848673	0.143036	0.154899	0.0576949	0.0146935	0.0633578	0.0983808	0.0758289	0.0736133	1
187.4	0.0462621	0.0202035	0.105899	0.0737674	0.0532095	0.0349885	0.114024	0.0531504	0.0254271	0.0320538	1
187.6	0.070169	0.0216408	0.0714545	0.0484643	0.0265165	0.05819	0.102297	0.0536725	0.0354206	0.0260706	1
187.8	0.0735173	0.0804834	0.0181484	0.04596	-0.00101651	0.0479854	0.0647186	0.0705601	0.0530088	0.0272502	1
188	0.0240775	0.0669148	0.00160345	0.0195716	0.00562234	-0.00361888	0.0546512	0.0585537	0.0207953	0.00259909	1
188.2	-0.0159606	-0.0073591	0.083937	0.0201661	0.0193409	-0.0352281	0.0165169	0.0444801	0.0321366	-0.0015612	1
188.4	0.0123628	0.00592765	0.0181931	0.0210218	-0.00181945	-0.0048482	0.016234	0.0334649	0.0153824	-0.0119149	1
188.6	0.0351752	0.0555772	-0.0327924	0.0501508	-0.00932613	0.02111	0.0512253	0.00691033	-0.0186144	0.000967131	1
188.8	-0.0265925	0.0391527	0.000775971	0.0864839	-0.00955696	0.00963149	0.0275454	0.0201436	-0.0261656	0.0109634	1
189	-0.0479362	0.0191109	0.0169122	0.0221328	-0.0105851	0.0116164	0.045866	0.0150701	-0.00908218	-0.0184987	0
189.2	-0.0352979	-0.0144672	-0.0339479	-0.0523487	0.00413839	-0.0249296	0.0633206	-0.00527802	-0.0264653	-0.0461935	0
189.4	-0.061048	-0.0350835	-0.0497307	-0.0196062	-0.000847067	-0.0774909	-0.00647433	-0.0063753	-0.0460519	-0.0293166	0
189.6	-0.0637711	0.0337475	0.0109132	-0.00405519	-0.049849	-0.0200163	-0.0369579	-0.0265678	-0.0081347	-0.0136209	0
189.8	-0.0699907	-0.0131432	-0.0126612	-0.0708623	-0.0353625	0.00466643	0.00425082	-0.0370576	-0.0444528	-0.03132	0
190	-0.066224	-0.0434791	-0.0229694	-0.0326932	-0.056409	0.0209538	0.0225169	-0.0536973	-0.038596	-0.0161819	0
190.2	-0.048341	-0.0470899	-0.0434172	0.00466297	-0.0541183	0.00607051	0.0287501	-0.0447523	-0.0200945	-0.0353182	0
190.4	-0.0366654	-0.00392844	-0.0509721	-0.0115178	-0.0141018	-0.0050097	0.000807569	-0.0130361	-0.0294017	-0.045869	0
190.6	-0.023536	-0.00653317	-0.0229226	-0.0437785	-0.00495347	-0.00536857	-0.0260875	0.00574233	-0.0285645	-0.0291104	0
190.8	-0.0104037	-0.090725	-0.0160222	-0.0619183	-0.0266482	-0.0231592	-0.0219441	-0.00603686	-0.00178592	-0.0333624	0
191	-0.0221992	-0.0521901	-0.0558463	-0.0290372	-0.0181884	-0.00992165	-0.0343851	-0.0356833	0.00466541	-0.0172047	0
191.2	0.00412626	0.0133267	-0.0775081	0.00572142	-0.0256543	0.0334377	0.0624091	-0.0490073	-0.00140427	0.00785939	0
191.4	-0.0189811	0.027094	-0.014306	-0.000977284	-0.0373992	0.011432	0.0313451	-0.028774	-0.0213529	-0.011011	0
191.6	-0.0455408	-0.0276958	0.00605466	-0.0419858	-0.0319409	-0.0182241	-0.0249666	-0.019387	-0.0472488	-0.0495341	0
191.8	-0.0454478	-0.0363515	-0.0274498	-0.102323	-0.0338497	-0.0312148	-0.0155172	-0.035999	-0.0379571	-0.0419752	0
192	-0.0469704	0.00144023	-0.0411382	-0.0576212	-0.0316443	-0.0330592	-0.0127398	-0.0248554	0.00275069	-0.0220008	0
192.2	-0.0469051	-0.0165665	-0.0413144	0.0640938	-0.0048175	-0.0153434	-0.0371759	0.0177828	0.0104224	-0.0399306	0
192.4	-0.0286914	0.00509759	-0.0263918	-0.0423208	-0.0177531	-0.0339435	-0.0409086	0.00197715	-0.0258173	-0.0142215	0
192.6	-0.00164035	0.0144206	-0.00996668	0.0246437	-0.0094726	-0.0269602	-0.00902048	-0.0040409	-0.0411235	-0.0119734	0
192.8	-0.0400879	-0.0312343	-0.0316126	0.0873206	0.0208862	0.0179274	0.0296362	-0.0173727	0.0149271	0.00286772	0
193	-0.0560044	-0.0428753	-0.0309332	0.00192388	-0.0109329	-0.0354349	-0.00466896	-0.0137014	0.0101979	-0.0183624	0
193.2	-0.030992	-0.00913737	-0.0148265	-0.0579104	-0.0397261	-0.0612053	-0.0080202	-0.0295853	-0.0295755	-0.0180732	0
193.4	-0.0168762	-0.00609004	-0.0378468	-0.020999	-0.00645669	0.0120519	0.0491718	-0.0590667	-0.0202843	0.0261176	0
193.6	0.00658247	-0.0300888	-0.0434543	-0.0421226	-0.00724063	-0.0182238	-0.0063465	-0.000757552	-0.0221124	-0.00578521	0
193.8	-0.00687726	-0.0374146	0.00895535	-0.0466378	6.1137e-05	0.0237984	-0.0322071	0.0430814	0.0367656	0.010982	0
194	0.0134358	-0.0220312	-0.00627279	-0.00758735	-0.0408016	-0.00186264	-0.00938632	0.029138	0.00165317	0.024668	0
194.2	0.0421466	0.028628	0.0158963	0.00705199	-0.0256503	-0.00543576	0.0119571	-0.030109	-0.0103513	0.00224821	0
194.4	0.00509064	0.00596647	0.0268908	-0.00519341	0.0174587	0.0436718	0.0102787	-0.0120963	0.00928927	-0.0289202	0
194.6	-0.032698	-0.048456	-3.60433e-05	-0.0133256	0.0132838	0.0401674	-0.026809	0.037465	-0.00377445	-0.0195629	0
194.8	0.00753749	-0.0114477	0.0166491	-0.00211988	0.0115694	-0.00555934	-0.0493467	-0.0109534	-0.00890274	0.0110708	0
195	0.0213254	0.000427571	0.017804	0.0385771	0.0408034	0.0114152	0.00689693	-0.0409064	-0.00486732	-0.0102816	0
195.2	-0.00117092	-0.0160824	0.0117387	0.0521639	0.00878687	-0.0302329	-0.0345507	-0.0156764	-0.0601507	-0.0097993	0
195.4	-0.00406399	0.0073586	-0.0369192	0.0713985	0.00390455	-0.0340899	-0.0252312	-0.0105126	-0.00909156	0.0029695	0
195.6	-0.00206642	0.0152455	-0.0227726	0.018124	0.00593722	-0.00422761	0.0366142	0.0335762	0.0274629	-0.0196192	0
195.8	0.00448138	0.0197158	0.000921508	-0.0187168	0.00317515	0.0107689	0.0357711	0.0177023	0.0156584	-0.0159709	0
196	0.0100866	0.0178217	-0.0166322	0.0185928	0.00384738	0.0207159	-0.00349491	-0.0421524	0.0239268	0.0337424	0
196.2	-0.00780336	-0.0343233	0.0109854	-0.0139222	-0.0185792	0.0249703	-0.00266242	0.0035389	0.0137497	0.0295015	0
196.4	0.00145419	-0.00770777	0.00749356	-0.064919	-0.0252833	-0.0109268	-0.0320107	-0.0363351	0.00275707	-0.012662	0
196.6	0.029739	0.0581444	0.00353755	0.0145535	0.00477041	-0.0109267	-0.00367426	0.0226447	0.000356026	0.00718778	0
196.8	0.025241	0.0484486	0.0176864	-0.0342119	-0.00725831	-0.00428141	0.0166424	0.0127573	0.0297279	0.0339481	0
197	0.0142926	-0.0429766	0.0234634	-0.0631874	-0.00120198	-0.00885806	0.0119362	0.0104864	0.0305489	0.0102953	0
197.2	0.00399654	-0.0361313	-0.0119702	-0.0213571	0.0144861	-0.0126116	-0.000424993	0.0199912	-0.0161896	-0.0055543	0
197.4	-0.010873	0.0448771	-0.0342534	-0.0253646	-0.00516984	0.00158366	-0.0133689	-0.0186337	-0.0353327	0.0110582	0
197.6	0.00221884	-0.0382697	0.0106802	0.0179617	0.019581	0.0309867	-0.0117184	0.011735	0.00916395	-0.0053395	0
197.8	-0.007429	-0.0446731	-0.0228341	-0.0254006	0.033186	0.0169807	-0.0224593	-0.0482805	0.0408478	0.00827837	0
198	-0.0194351	-0.0394193	-0.0413205	0.0278061	-0.00396907	-0.00351434	-0.000194143	-0.00769216	-0.00457179	0.00631131	0
198.2	-0.00616239	0.00517306	0.0222638	-0.00252721	-0.0249426	-0.0285158	0.00727093	0.019706	-0.0301523	-0.00277413	0
198.4	-0.00640554	0.0375192	0.0493839	-0.0123141	-0.0202361	-0.0379312	-0.0051055	0.0224467	-0.0315782	-0.0132874	0
198.6	-0.00569868	0.0159895	0.0141285	0.061066	-0.00864115	-0.00573177	0.000702304	0.0315636	-0.0174108	-0.0248516	0
198.8	0.0199582	0.00525577	-0.000421499	0.017312	0.0154959	0.0226973	0.00115654	-0.0131497	0.0176062	-0.0188845	0
199	-0.00441932	0.0027609	-0.0317953	-0.0372697	0.0326037	-0.00930419	-0.0326986	-0.0426881	-0.0147274	0.00316485	0
199.2	0.00306725	-0.0103982	0.00825582	0.0152601	0.0447007	-0.0101826	-0.00232921	-0.0241189	-0.018913	0.0191579	0
199.4	-0.0129019	-0.00382864	0.0189017	0.0238691	-0.00661976	-0.00910161	0.0287524	0.0662642	-0.0220294	-0.00931986	0
199.6	-0.0127157	0.0532725	-0.0170492	0.0356052	-0.0223903	0.00106197	0.0179263	0.0106868	-0.00277888	-0.0111821	0
199.8	0.00267707	0.0324817	-0.00950438	0.0438171	0.00791641	0.0243973	0.0135527	-0.044257	0.00713448	0.0220908	0
200	-0.00240693	-0.0328023	0.000947711	0.00423507	0.00132914	0.0213467	0.0249653	0.0514289	-0.00722791	0.0198687	0
200.2	0.00442178	0.0192253	-0.0506962	-0.00356531	-0.0119898	-0.00298104	0.00386885	0.0428219	-0.00391936	-0.0077238	0
200.4	0.00756284	-0.0239711	0.00764732	0.00102219	0.0161886	0.0144882	-0.0118729	-0.0280648	-0.0409058	0.00769879	0
200.6	-0.0301754	0.0182365	-0.00697631	-0.00707512	-0.0220968	0.00312577	-0.0116135	-0.0150005	0.000249895	-0.00277155	0
200.8	-0.00266044	0.0237797	0.0396452	-0.0628989	-0.0168196	-0.00133071	-0.00235695	0.00829151	0.00943172	0.00381767	0
201	0.0028217	-0.0107958	-0.0164375	-0.0509411	0.000560004	-0.00882282	-0.0224134	-0.00548502	0.00279782	-0.000204313	0
201.2	-0.0290572	-0.0357246	-0.103014	-0.00611267	-0.0132367	-0.0126898	-0.0177856	-0.0463438	0.0273044	-0.0187937	0
201.4	0.00198822	-0.0449085	-0.0122184	-0.0312915	-0.0180974	0.00911966	0.0246878	-0.0641039	0.0268437	-0.0113444	0
201.6	0.0270974	0.00385738	0.0147758	-0.012681	-0.0291556	0.0203225	-0.00493382	-0.0174889	0.00352389	-0.00998349	0
201.8	0.00400694	0.000870109	0.0334692	0.0328094	-0.0129449	0.0420662	-2.39882e-06	-0.0316718	0.0258156	-0.00906575	0
202	-0.000725912	-0.00188553	0.00850693	0.0793046	0.000720837	-0.0153748	-0.0135015	0.0178839	0.0133993	-0.00249397	0
202.2	-0.00612566	-0.0051151	0.0119821	0.0659021	0.0262612	-0.00773884	0.0263983	-0.00123425	0.00132859	-0.00766158	0
202.4	-0.00475892	0.000159905	0.0497248	0.033762	0.0230283	0.00983759	0.0236009	-0.0189358	-0.0313206	0.00381498	0
202.6	0.00356952	0.0412423	0.0524394	-0.00831176	-0.00511595	-0.0187188	-0.0316858	0.0135185	-0.0514403	0.0230709	0
202.8	-0.00616074	0.0554088	0.0169167	-0.0596801	-0.0056025	0.00704006	0.00555935	-0.0041104	0.00182591	0.00502077	0
203	0.0136549	-0.0190401	0.00873619	-0.0057577	-0.0261342	7.48613e-05	0.0207885	0.0419143	-0.00732247	-0.00312022	0
203.2	0.0344761	0.0126308	0.0586825	-0.0358414	-0.0132299	-0.0271072	0.0072816	-0.00655306	-0.011338	0.0100633	0
203.4	-0.0124903	-0.0131024	0.018884	0.0101155	0.0214982	-0.044552	-0.0102533	0.0788362	0.0122862	-0.00556645	0
203.6	0.00651847	-0.0183285	0.00585753	-0.0145438	0.00905624	0.0201575	-0.0209695	0.0782661	0.00941771	-0.0308382	0
203.8	0.037307	0.0383949	0.0401697	-0.0461997	-0.0255808	0.0393366	0.00381298	-0.0269805	0.00387035	-0.00590159	0
204	-0.00152355	0.0385795	-0.00231221	0.0368627	-0.00813822	-0.0314042	0.0284774	-0.0223013	0.0248781	0.024392	0
204.2	0.0191817	-0.00738019	-0.0671627	0.00255677	0.0281533	-0.002945	-0.00288075	0.00431528	0.025134	-0.0122166	0
204.4	0.0112661	-0.0121407	-0.0548788	-0.0757898	0.00476134	0.0161457	0.0103131	0.0113139	0.0275184	-0.00483016	0
204.6	0.00459511	-0.00566625	-0.0475913	0.00921888	0.0085711	0.0112386	-0.0156662	-0.0112137	0.0092853	-0.00193073	0
204.8	-0.0245099	-0.00454072	0.0222775	0.0497046	0.0130193	-0.00538579	-0.0160644	-0.0544762	0.0112028	0.0131215	0
205	-0.0207942	0.0188112	0.016466	0.00195056	0.0215264	-0.000418373	0.00873211	-0.0286742	0.0101271	0.0265156	0
205.2	0.0118005	0.035343	-0.0420005	0.0237224	0.0136945	0.0171375	0.0337117	-0.00585191	0.00159261	0.0262862	0
205.4	0.00575583	-0.0209411	-0.00115765	0.0631327	-0.0115269	0.00217242	0.0320453	-0.0392412	0.00638441	0.0162823	0
205.6	0.00228938	-0.0787207	0.00637494	-0.0317308	0.023139	-0.0255348	-0.0411531	0.0418277	-0.0109195	-0.0224724	0
205.8	0.00151224	0.0194204	0.0362578	0.0016402	-0.0033194	-0.00931085	-0.0232645	0.0491414	-0.00652361	-0.0266946	0
206	-0.00723507	0.00841801	-0.0149063	0.0131528	-0.00805027	-0.0196512	-0.0208035	0.0260794	-0.0225178	-0.0078911	0
206.2	0.0119508	0.012474	-0.0207359	-0.0174627	-0.0143902	-0.00474504	0.00958695	0.00116159	-0.0138125	-0.000827059	0
206.4	0.0314994	0.011913	-0.0194732	0.013651	-0.00528113	-0.000105939	0.0201665	-0.0137075	0.0029859	0.0123809	0
206.6	0.0098229	-0.0460184	-0.0403923	0.0553203	0.01507	-0.00307999	-0.0165417	0.00108934	-0.00106094	0.0102724	0
206.8	-0.00594748	-0.0161427	0.0304752	0.0109749	-0.00561797	0.0468728	-0.0184976	0.0155757	0.00310015	-0.0247542	0
207	0.0208859	-0.000523011	0.0418889	-0.00111476	0.0133959	0.0114359	-0.0494756	-0.00852654	-0.015162	0.00756184	0
207.2	-0.0116033	-0.0172348	-0.0181248	-0.00121088	-0.000579195	-0.00885753	0.00230446	0.00297345	-0.03192	0.00395819	0
207.4	-0.0123306	0.0239241	-0.030984	-0.0643974	-0.0108488	-0.00326034	0.00894352	0.0078536	-0.0165488	0.00538569	0
207.6	-0.00235356	0.00461985	0.0163401	-0.0176089	-0.0121796	0.0184748	-0.0233325	-0.00141165	-0.00529903	0.015846	0
207.8	-0.0207036	0.00125715	0.0179408	0.047712	-0.00776398	0.0209089	-0.012315	0.00692715	-0.00981763	0.0187175	0
208	-0.0312618	0.0644502	0.00268828	-0.0216488	0.00447533	-0.00688767	0.0174207	0.0141458	-0.00659152	0.0102205	0
208.2	-0.0143779	-0.00426429	0.0519502	-0.0276834	0.00246857	-0.0164987	0.0178759	-0.0177821	0.000702986	-0.0199377	0
208.4	0.0209158	0.0202969	-0.0325732	-0.00777482	0.00477786	-0.0248747	0.0214972	-0.0409631	0.0136893	-0.0266236	0
208.6	-0.015673	0.0144884	0.0517008	0.00883172	-0.00117147	-0.00629122	-0.0299592	-0.0246568	0.0156903	-0.0108942	0
208.8	-0.0296896	-0.00640241	0.0405569	-0.0240329	-0.00653037	0.0245271	-0.0319616	0.0274268	-0.00297738	0.00553724	0
209	0.00765052	-0.0218129	-0.0244053	-0.0237597	-0.00387284	-0.00134652	0.027641	0.0331262	0.00840851	0.0165866	0
209.2	0.0117365	-0.0219928	-0.0201438	0.00237095	0.00364325	-0.0255038	0.052321	-0.0121298	0.0100199	0.0365461	0
209.4	-0.0135272	0.00921891	-0.0453911	-0.0252392	0.014029	0.0242263	0.0106691	-0.00108731	-0.0256086	0.0257924	0
209.6	0.0178582	0.0206642	-0.0136411	-0.00691433	0.0157407	0.0154657	-0.0281216	0.0495239	0.0194655	-0.0503308	0
209.8	0.00462856	0.0284565	0.00386104	0.0287891	-0.0138838	-0.0393473	0.00404712	-0.0224203	0.00683168	-0.00651688	0
210	-0.00778636	-0.0111733	0.0405331	0.0136852	-0.00718711	-0.0372635	0.016148	0.00684964	0.0209317	-0.0162689	0
210.2	-0.00855043	0.0140988	0.0180099	0.00341047	0.00520625	-0.00576077	-0.0187905	-0.00804372	0.0412526	-0.00556837	0
210.4	-0.0180821	0.00736296	-0.00773928	0.0110329	0.00490216	-0.00168565	-0.0162135	-0.0112189	0.0102728	0.0197807	0
210.6	-0.00981466	-0.0642902	0.00222747	0.0280933	0.000774137	-0.00677416	0.0191873	0.0266662	-0.0261002	-0.0175441	0
210.8	0.0190775	-0.0207809	-0.037333	0.0590598	-0.00988012	0.00469227	0.0204932	-0.0826154	-0.0140308	-0.0310041	0
211	-0.0074189	-0.00894811	-0.02005	0.0134418	0.00699412	0.00317782	0.0507868	-0.0506178	-0.0104827	-0.00944333	0
211.2	0.00063437	-0.0297941	-0.00400183	-0.0326779	-0.0063688	0.018948	-0.0397515	0.0213739	-0.0275255	0.00726343	0
211.4	0.0240479	-0.044313	0.0048568	-0.0448675	0.00471623	0.0137625	-0.0326319	0.0345963	-0.00535277	0.00502698	0
211.6	0.00257519	0.014544	9.3218e-05	-0.0374984	0.0143475	0.031547	0.0386767	0.00376809	0.0152981	-0.000437565	0
211.8	0.00602608	0.0273882	-0.00672226	-0.0021458	0.00665791	0.0409476	0.019924	0.000115614	-0.0156667	0.0080926	0
212	0.0463285	-0.0214139	0.0213182	0.0296567	0.0042244	0.00198826	-0.0243401	0.025563	-0.0355945	0.0199153	0
212.2	0.00204813	0.0544124	0.0486589	0.00750121	-0.0132787	0.000741732	0.0186314	-0.00264847	0.00440151	0.0120436	0
212.4	0.00491462	-0.025562	-0.019975	0.0310593	-0.0104317	-0.0223278	0.0463146	-0.047083	0.000526848	0.00765151	0
212.6	-0.0223733	-0.0215982	-0.0301734	-0.0319103	-0.0199241	-0.0227928	-0.0163593	0.0212206	0.0487715	0.0336813	0
212.8	-0.0277304	0.0583866	0.0424861	-0.0403491	-0.0111656	0.00494636	-0.0469978	0.0158557	0.00469685	0.0120788	0
213	-0.00743574	0.0321281	0.0621961	0.0407837	-2.75578e-05	0.00210088	-0.0176337	-0.00655303	0.0091284	-0.0390577	0
213.2	-0.00503498	-0.0413543	0.00192516	0.0556206	0.0103477	-0.0169141	0.00903594	0.0190701	0.0632263	-0.0266403	0
213.4	-0.00366239	-0.0124134	-0.0235946	0.00182776	0.0329375	-0.0105295	0.0123553	-0.0135744	-0.0191181	0.0388429	0
213.6	0.000872774	0.00164866	-0.0212363	0.0259422	0.0117797	-0.0224463	-0.0132734	-0.00437985	0.00299998	0.0445293	0
213.8	-0.011343	-0.0013687	-0.0818918	-0.0317211	0.019028	0.029678	-0.0232838	0.00578353	-0.00918296	-0.0207995	0
214	-0.0110115	-0.0151944	0.0120213	-0.0650254	0.00508878	0.0231666	0.0159386	0.0293611	-0.013659	-0.0149844	0
214.2	0.0213713	-0.000661428	0.0564768	-0.0297578	-0.00713297	0.0262746	-0.0012402	-0.0233098	0.00850759	-0.00376213	0
214.4	0.0324624	0.01865	-0.0350114	-0.00070415	-0.0169263	0.0163017	-0.0175323	-0.0344737	0.0217858	-0.0252747	0
214.6	0.0116373	6.80313e-05	-0.0348576	0.00981142	-0.0232078	-0.03056	0.0284825	0.0557673	-0.00192184	-0.0198609	0
214.8	0.00411709	-0.0126983	0.0568587	0.038929	0.00443686	0.00519366	0.0144795	0.0378252	-0.035081	-0.00783645	0
215	-0.0350665	0.015855	0.00163003	0.0217882	-0.0121945	0.0114778	-0.0120626	-0.00971669	0.00419964	-0.0210842	0
215.2	0.000845186	0.00534456	0.0293868	0.00221134	-0.009073	0.00488326	-0.013464	0.0157606	0.0130999	0.00857181	0
215.4	0.0104377	0.0324729	0.0290402	-0.0211127	-0.0296911	-0.0201115	-0.000964611	-0.00903095	0.0001571	0.0130345	0
215.6	0.00181615	0.0429791	-0.00476235	-0.067124	-0.0183274	-0.0226592	0.0133636	-0.00527296	0.0203719	-0.0133836	0
215.8	-0.0175252	-0.00655601	-0.00429328	-0.0357503	0.00813345	-0.00668855	0.00462709	0.0362204	0.0332513	-0.0221627	0
216	-0.0255219	-0.0254494	-0.0229474	0.0747875	0.00192156	0.00360421	0.00520351	0.0235682	-0.0159613	-0.00436524	0
216.2	0.0611811	0.00884319	-0.0579188	0.0566083	0.0431739	0.0445344	0.0617388	0.0182102	-0.0534398	0.0237752	0
216.4	-0.00718952	0.0115528	-0.00196524	0.00435866	0.0082893	0.0397562	0.00238704	-0.0747039	-0.0136868	0.0351944	0
216.6	0.0006848	-0.000961426	0.011884	-0.0284379	-0.00524474	0.00238947	-0.0554081	-0.0108156	-0.0161932	0.0306069	0
216.8	0.0399261	-0.0125622	-0.00113118	0.022834	-0.00665736	-0.0121272	-0.039111	-0.0140914	-0.000673793	0.00685523	0
217	0.0228172	-0.002127	-0.00326933	0.0549398	-0.0102098	-0.00965224	-0.0312606	-0.0686065	0.0288834	0.00397381	0
217.2	-0.0125155	0.0177348	-0.0185803	0.00115786	-0.0101189	-0.0190767	-0.0424304	-0.0206034	0.0192764	0.00745034	0
217.4	-0.0215633	0.0191791	-0.0308872	-0.0169889	-0.0102433	-0.0246866	0.00568486	0.0198505	0.0138845	-0.0168966	0
217.6	0.014501	0.0181673	0.0104299	0.0171108	0.020005	-0.00844679	0.0418101	0.0230261	0.0188953	0.0122595	0
217.8	0.0148503	-0.0444341	0.0493418	-0.0100566	0.00723799	-0.00738093	0.0100083	-0.00943549	-0.016402	0.0230162	0
218	-0.00240349	-0.00916305	0.0343318	0.0246616	0.0137424	-0.0236222	0.0173228	0.0241141	-0.00322025	-0.000178303	0
218.2	0.00279783	0.0345168	-0.0205789	-0.0290695	0.00380345	-0.00304043	0.0254915	0.0291542	-0.00171267	-0.0182615	0
218.4	-0.0146576	0.0184247	-0.0432393	-0.0624887	0.0111549	0.0155359	0.011729	0.0064438	-0.0132234	-0.0181074	0
218.6	-0.0378115	0.0134283	0.0059448	0.0164924	0.0355472	-0.00154449	0.0100938	0.0201056	0.00352507	-0.0274915	0
218.8	0.0113412	0.00516844	0.0561395	-0.0451789	-0.0168688	0.0164679	0.00950143	0.00454073	-0.00584614	-0.0242056	0
219	-0.00293987	-0.0236852	0.0158239	-0.0108803	0.0155428	0.0317451	0.0390822	0.0172816	0.0134804	0.0520754	0
219.2	-0.0172164	-0.0145721	-0.0227701	-0.0281053	-0.000417574	0.0178424	-0.01359	0.0114575	-0.00466117	-0.0151442	0
219.4	0.025488	-0.0563873	-0.00878403	0.00550933	-0.0116478	-0.00745512	-0.0216274	-0.0254133	-0.0379826	-0.0233225	0
219.6	0.0219777	-0.0013812	0.0168979	0.0537406	0.0119788	0.0204681	0.0395633	-0.00431637	0.00998309	-0.0142841	0
219.8	-0.0139398	0.0553731	0.0207314	0.0125637	0.00816203	0.0276962	0.0307774	0.037987	0.0478082	-0.0319259	0
220	0.00765705	-0.0366366	0.0243599	-0.0289921	-0.0162008	-0.0329877	-0.0153197	-0.00021913	-0.00293638	0.0144474	0
220.2	0.00310905	0.0342262	0.0330086	0.0251048	-0.000241346	-0.00553105	0.0520553	-0.0342909	0.0220818	0.00703849	0
220.4	0.0232756	0.0146391	-0.00124492	0.0601209	-0.0145908	-0.0144216	-0.0261537	-0.0316767	-0.0158262	0.0498791	0
220.6	-0.0263546	0.00201685	-0.0077807	0.0233363	-0.0121686	0.010019	-0.038997	-0.0118083	0.000297916	0.0106512	0
220.8	-0.0138916	0.00330231	0.00588309	-0.023185	-0.0168139	-0.0184999	-0.0189298	0.02014	0.00273112	-0.0180557	0
221	0.0335655	0.00862981	0.00228635	-0.047774	-0.00300994	-0.0243158	-0.00135372	0.0359717	-0.00032563	-0.0117526	0
221.2	0.0107302	0.0272152	-0.0225798	-0.0225919	0.00910578	0.0294226	-0.0126631	0.0369577	0.01316	-0.0193345	0
221.4	0.000754848	0.0153653	-0.0324498	0.0586469	-0.0249	0.00267073	-0.065208	0.0262204	-0.0228833	-0.00304703	0
221.6	0.0171337	-0.0101611	0.0125692	0.0522637	0.0222565	-0.00107863	0.0487635	-0.0545189	-0.00746875	-0.00337316	0
221.8	-0.0250454	-0.00399582	0.0073648	-0.0501543	-0.00920514	-0.027562	0.00947929	-0.044856	-0.00795722	-0.0056	0
222	-0.0275374	-0.000396404	-0.0194702	-0.0316348	0.00511375	0.017543	-0.00333517	-0.00180049	-0.0126149	0.0226659	0
222.2	0.00245984	-0.0376402	-0.0153396	-0.01078	0.0194504	0.0200707	0.00319123	0.0370254	-0.0133313	0.00579661	0
222.4	0.00930596	-0.0544875	-0.00725408	-0.0359552	-0.000135757	-0.0119523	-0.024084	0.0484994	-0.0218754	-0.00320338	0
222.6	0.00380033	-0.0104921	-0.0394557	0.00715809	0.0118624	0.0176525	-0.0144073	0.00487966	-0.0247766	0.0530144	0
222.8	-0.0045468	0.00387555	-0.0746954	0.0355166	0.015165	-0.00798822	0.00846524	-0.0358691	0.00408455	0.0333586	0
223	-0.0238788	-0.0269826	-0.0272563	0.00413537	0.00841153	-0.0389557	0.0314237	-0.0140289	0.0392228	-0.0220848	0
223.2	-0.00697588	0.00682639	0.0871648	-0.00996559	-0.00612679	0.0415297	0.0124357	0.0122199	-0.00529209	-0.00116295	0
223.4	-0.0122382	0.0251991	0.0426573	-0.0312416	-0.0147155	0.000507614	-0.00441584	-0.0116538	0.015057	-0.00908025	0
223.6	-0.0221689	0.0167686	-0.003782	-0.0267219	-0.00744482	-0.0461431	-0.00722307	-0.0229613	0.0198758	-0.0336409	0
223.8	-0.000920341	0.00237585	0.0378963	0.00319213	0.00155591	0.0224451	-0.0221162	-0.00619789	-0.00843776	-0.0098322	0
224	0.0101197	-0.0227608	0.00167266	0.00311983	-0.0113015	0.0265796	-0.0235421	-0.00294449	0.010855	0.00977862	0
224.2	-0.000560092	0.0134102	0.00143229	0.0214642	-0.0271623	-0.0118994	0.0102304	0.0249686	-0.0636578	-0.0120518	0
224.4	0.00511853	0.0449091	0.017102	0.032839	0.0108983	-0.00716174	-0.0247397	0.0017643	0.0394734	-0.0390517	0
224.6	0.020144	0.00366562	0.00609371	0.0140708	0.0101202	0.0083361	0.0174865	0.00628205	0.021925	0.0208286	0
224.8	0.0141564	-0.00761702	0.0385074	-0.01679	-0.0015119	0.00807649	0.00597262	-0.0233643	-0.0373081	0.0111708	0
225	-5.10784e-05	0.00547467	0.0143684	0.000948942	-0.005322	-0.00560337	-0.0334642	-0.0432295	0.0193432	-0.0233015	0
225.2	-0.00708127	-0.0196928	-0.0765627	0.0228453	-0.0102128	-0.0179521	-0.0051491	-0.00445194	0.0611724	0.0170481	0
225.4	-0.0103853	-0.0182428	-0.0483032	-0.0216211	0.00837308	-0.00549549	-0.0120105	-0.00757672	-0.00347585	0.0164994	0
225.6	0.0185806	0.0153886	-0.0269019	0.0063903	0.00607246	0.0289164	0.0133601	-0.00169275	-0.0107358	0.0171919	0
225.8	0.0242243	-0.00100641	0.00963568	0.00787686	0.000659302	0.0297336	0.0377294	0.023498	-0.0231836	-0.00678769	0
226	0.0156006	0.00500576	-0.00223015	0.039215	0.0197996	0.0244307	0.07434	0.027998	-0.0105452	0.0200549	0
226.2	-0.0099944	-0.00493878	-0.0288921	0.0385888	-0.00747646	0.0193965	0.0283102	-0.00246612	0.00718142	0.0210387	0
226.4	-0.0268195	-0.0405908	-0.00489867	-0.00724962	-0.0279857	-0.0141611	-0.0439827	0.00616234	0.00874439	-0.00414426	0
226.6	-0.0268161	-0.022076	0.0210265	-0.024091	0.00473734	-0.0465326	-0.0254718	0.0529789	0.0219881	-0.00122355	0
226.8	-0.0514593	0.023675	0.00145053	-0.0378356	-0.0280796	-0.0178312	-0.00947323	0.0143132	0.0318868	-0.0418587	0
227	-0.0193384	0.0207794	0.0323881	-0.0082622	0.00914097	0.00502628	0.0383916	-0.0174643	0.0053204	-0.0104947	0
227.2	-0.00438002	-0.0103426	-0.0176706	0.00447717	-0.00028306	0.0227121	0.0546325	0.0041723	-0.0225658	-0.030096	0
227.4	0.00180921	-0.0129115	-0.0136206	-0.0364271	-0.00770691	0.00725886	0.0183552	0.0339084	-0.00959403	-0.00926579	0
227.6	0.0167765	0.0116181	0.0407653	-0.0391686	0.0081892	0.00031251	-7.27383e-05	0.00258123	-0.00721799	0.0262629	0
227.8	0.0200668	0.0290814	0.0378306	-0.0106012	-0.000346795	-0.00163268	-0.0115843	-0.0275703	-0.0204511	0.0108795	0
228	0.0193469	0.0386622	0.00808689	-0.000142099	-0.00248755	-0.0312967	-0.041217	0.0051697	0.00981815	0.00134918	0
228.2	0.0354947	0.0547919	-0.0129784	0.0907191	0.0270696	0.00359991	0.0144691	-0.0184379	0.0321275	-0.0122612	0
228.4	0.00859295	0.0433852	0.00922027	0.00945592	-0.0260457	0.00970402	-0.0104573	0.0114922	0.0257986	0.0237739	0
228.6	-0.00537153	-0.00453604	0.0176115	-0.021914	-0.00374297	0.0166649	-0.0195474	0.0254864	-0.0298429	0.0278346	0
228.8	0.00995888	-0.0263557	0.0160148	-0.0239035	0.0222683	0.0112151	-0.0402994	-0.0297873	-0.0211421	-0.00647799	0
229	0.00382141	-0.0293166	-0.01672	-0.0202443	-0.0246855	-0.00991265	-0.0542574	-0.028541	-0.00793632	-0.0115219	0
229.2	-0.00933126	-0.0353519	-0.060337	0.0203745	-0.0256106	-0.0231952	0.00954362	0.0284184	-0.050368	8.67585e-05	0
229.4	0.00795934	-0.0292915	-0.0198976	-0.000540901	0.0373445	-0.0235279	0.0601579	-0.0312068	-0.0109497	-0.0157275	0
229.6	-0.0337055	-0.0641294	0.0264495	-0.0197139	-0.0173643	0.0149005	0.0189049	-0.0604416	0.0253281	0.0183043	0
229.8	-0.00674808	0.0271278	-0.000742055	-0.0401937	0.0315173	0.0133082	-0.00726527	-0.0095059	0.0221377	-0.00587399	0
230	-0.0220337	-0.0157351	-0.00997347	0.0116338	0.0154157	-0.0156043	0.000672503	0.0289124	0.0314884	-0.0112889	0
230.2	-0.0361174	-0.0307823	0.0144161	0.0297556	-0.0434758	-0.0263263	-0.00353464	0.0338689	0.0270605	0.00102174	0
230.4	0.00879551	0.0294003	-0.00689338	0.0280807	-0.0184388	-0.0228199	0.00121398	0.0326075	-0.00955579	0.0115292	0
230.6	0.0388359	-0.0180664	-0.0394191	0.0792957	0.0215792	-0.00835579	0.0428253	0.0219313	-0.0237641	0.0312484	0
230.8	0.0459832	0.0285213	0.0235751	0.023775	0.0105792	0.0262347	0.0397007	0.0133063	-0.00899492	0.00466799	0
231	0.0190101	0.0431985	0.0281578	-0.00802879	0.00781014	-0.00610829	-0.0262294	0.034648	-0.018344	0.00017793	0
231.2	0.00870101	0.0154906	-0.0189132	-0.0212786	0.0100758	-0.00230462	0.0141744	0.0182666	0.00786068	0.0366864	0
231.4	0.0148937	0.00850846	0.0231192	0.0167304	-0.0114638	0.0210126	0.0225733	-0.0269787	0.00602599	-0.0131875	0
231.6	0.0266214	0.00600246	0.0303845	0.0227916	-0.0116669	0.0158755	-0.00429626	-0.0144914	-0.00658675	-0.0330307	0
231.8	-0.000574458	0.0022334	-0.0539141	-0.0296897	0.022155	0.0181596	-0.0157227	0.0269999	0.00187272	0.0185035	0
232	-0.0522324	0.0135552	-0.0252018	-0.0230025	0.0221453	0.040904	-0.0491346	0.0154251	-0.00447013	-0.0185613	0
232.2	0.00746219	-0.0227865	0.05603	-0.0113318	0.00114538	0.0106617	0.0237141	0.0214916	0.0203316	-0.00820923	0
232.4	-0.00781023	0.00475413	0.0121377	-0.0581691	0.0172406	-0.00985331	0.0051118	-0.0420935	-0.00818615	0.000496538	0
232.6	-0.0310545	-0.0109883	-0.035851	-0.0434314	0.00477203	-0.0204872	-0.0305742	-0.0441946	-0.0224258	-0.0118863	0
232.8	-0.0142241	-0.0123567	-0.0138567	0.00981331	-0.00726745	-0.0115281	-0.0178901	-0.0267499	-0.012199	-0.00575084	0
233	-0.0113457	0.00379617	-0.00955192	0.036571	0.00729643	0.0157746	-0.013332	-0.0157734	-0.00539934	0.00876766	0
233.2	-0.0316358	-0.0221415	-0.0172363	0.0104847	0.00455098	0.0212799	-0.0129174	-0.00505188	0.00615501	0.00480933	0
233.4	-0.0180966	-0.0100987	0.0543847	-0.0516644	-0.0220155	-0.0127264	0.0291087	-0.0443684	0.0138026	0.00686383	0
233.6	0.0174479	0.00507302	0.0363392	0.00201483	-0.0294011	-0.0373857	-0.0113976	0.0205169	-0.0128552	0.00282228	0
233.8	0.0370453	-0.0204148	-0.00838604	0.0176917	-0.000131342	-0.0214903	-0.0199338	0.0133383	-0.00566876	-0.0169509	0
234	0.0200527	0.00253494	0.0296744	0.0276141	-0.00614214	-0.00877949	0.000651096	-0.0449765	-0.00515191	-0.0183134	0
234.2	0.0205389	-0.00578942	0.0298517	0.015559	-0.00519909	0.00238877	-0.0142753	-0.0130624	0.0079821	-0.00998073	0
234.4	0.0255312	-0.0381109	0.00437635	-0.0275857	-0.00438335	0.000984457	0.00886999	0.0604863	0.0136286	-0.00187349	0
234.6	-0.0103512	0.0264895	0.0349094	-0.0073007	-0.0342297	-0.0251129	0.0733069	0.0355492	-0.0126592	0.0228053	0
234.8	-0.00874495	0.0607557	-0.0589031	0.0363381	0.0180141	-0.0165192	0.00718683	-0.00945765	0.0323115	0.033832	0
235	0.00949488	0.00784029	-0.073595	-0.0533798	0.0181195	-0.0257593	0.0345469	0.0268364	0.0212675	-0.00813445	0
235.2	-0.0235011	-0.0302057	-0.0061111	0.0196515	0.00774283	-0.0116417	-0.0284441	-0.0144776	-0.0284843	-0.000750284	0
235.4	-0.0341535	0.0220237	0.000313581	0.0408384	-0.0271593	0.0274874	-0.0286954	-0.0430509	0.00829554	-0.00148727	0
235.6	-0.00787427	0.0208758	-0.0463093	-0.0292879	-0.0100067	0.0287654	-0.00382586	-0.0154862	0.0257771	-0.026512	0
235.8	0.0121536	-0.029536	-0.0413039	0.00221369	0.0457109	-0.000155503	-0.0193653	0.00093604	-0.0254782	-0.0293783	0
236	0.0256771	0.034848	0.0237456	0.0400446	0.00500393	0.00501206	0.0516873	0.000936767	-0.00220548	-0.0152254	0
236.2	0.00623953	0.0170176	0.0838557	-0.00883809	0.00639294	0.0040643	-0.0245414	-0.0331113	-0.0162551	0.0301813	0
236.4	0.0138267	0.00171912	0.043896	-0.00869602	0.00987888	0.0143004	-0.0556994	0.0031912	-0.018937	0.0293439	0
236.6	0.0124618	-0.0425932	-0.0390645	0.0124275	-0.0274247	0.039522	-0.0409246	0.0257967	-0.0191709	-0.0096701	0
236.8	0.00290668	-0.00166418	-0.0133152	0.0469867	0.00151965	0.0232139	-0.0196304	0.0429303	0.00158387	-0.0347438	0
237	0.0148307	0.0718235	0.0424572	0.0369257	0.0497208	0.00717701	-0.00312534	0.0173665	0.0255187	-0.011213	0
237.2	0.0284996	0.0234681	-0.0015741	-0.0240426	0.0255058	0.009987	-0.00315356	-0.039487	0.00833792	0.0220595	0
237.4	0.0131326	-0.0246908	-0.0224505	-0.00656307	0.0270089	-0.0421845	0.0148314	0.0178524	-0.00522919	0.00552319	0
237.6	0.00129915	-0.0150702	-0.00409252	-0.0152628	-0.0221327	0.00955817	0.0762478	0.0119924	0.0308366	0.00844598	0
237.8	-0.0233825	-0.00108307	0.0270055	-0.0114804	-0.0321273	-0.00689383	0.0162327	0.0626058	0.0330396	0.00963929	0
238	-0.00360982	-0.00485612	0.0195334	-0.00752418	-0.0188702	-0.0281086	0.00451566	0.0104809	0.0168776	0.0155279	0
238.2	0.0105179	0.0234806	-0.0241242	-0.0125867	-0.00105463	-0.00940259	0.0157455	-0.0298483	-0.0246247	-0.00484423	0
238.4	-0.00740703	0.0354496	-0.0490998	-0.00110298	0.0074728	0.00396335	-0.0118812	0.0131881	-0.0437819	-0.022876	0
238.6	-0.00242619	-0.0407628	-0.0193302	-0.00335808	0.00134794	0.00594271	0.00173637	-0.0268019	0.0101842	0.0161802	0
238.8	-0.01984	-0.0651525	0.0177029	-0.0691014	0.029792	-4.42081e-05	-0.0248479	-0.0233869	0.0148069	0.019761	0
239	-0.0276863	0.00727095	-0.0327863	-0.0534875	0.00623047	0.0226269	-0.00248336	0.0102891	0.0120722	-0.0123103	0
239.2	-0.0033767	0.0136825	-0.00344143	0.0202797	-7.98628e-05	0.0317869	-0.0104493	-0.0141982	-0.0190163	0.00168461	0
239.4	0.01102	0.0185116	0.0297471	0.0605684	-0.014128	0.0143207	0.00758295	0.00370642	-0.0510396	0.0124532	0
239.6	0.0220348	0.0162811	0.0489026	0.0405002	-0.00175827	0.00173874	0.0210567	0.027983	-0.0211627	0.00243424	0
239.8	0.029927	-0.0122459	0.0598062	-0.00420105	0.0272153	-0.000817309	-0.00545426	-0.0207575	0.0268437	-0.00227067	0
240	-0.00255786	0.00877243	-0.000969523	-0.0186284	-0.0271591	-0.0121293	0.034312	-0.0225815	-0.000221465	-0.011505	0
240.2	-0.000517129	-0.0559918	0.0533437	0.0341712	-0.030413	-0.00677926	0.0618205	0.0251416	-0.0193376	0.0142463	0
240.4	0.0221391	0.0111407	-0.00813816	0.0583827	-0.0443661	-0.00505748	0.00993254	-0.00930236	0.0203002	0.00681953	0
240.6	0.0181358	0.0561375	-0.0192594	0.00284779	-0.0154746	-0.0210061	-0.0199322	0.00895308	0.0222586	-0.011943	0
240.8	0.00566738	0.00784137	0.00637292	-0.0128535	0.00119693	-0.0319945	-0.0216391	0.0255519	-0.00823327	-0.00233526	0
241	-0.0195528	-0.0110842	-0.0178398	0.0546413	0.000880969	-0.0154684	-0.00029293	-0.00441984	-0.00973043	0.00181927	0
241.2	-0.0446772	0.0238376	-0.0502465	0.0527751	0.0294033	0.00297257	0.0194413	-0.00999696	0.0158464	-0.0108812	0
241.4	-0.00629049	0.000366555	-0.0759472	-0.0678626	0.00901754	-0.007828	-0.0577329	-0.0255707	0.0371507	0.00879871	0
241.6	-0.0221565	-0.0450445	-0.00034097	-0.0639917	0.00784784	0.00500885	-0.0704183	0.0103713	0.0259333	-0.0141603	0
241.8	-0.0386035	0.00559917	0.00809081	-0.020722	0.00398699	0.0131446	-0.00207422	0.0129157	-0.00777353	-0.00460916	0
242	-0.00916514	0.0406924	-9.75394e-05	0.0111262	0.00579279	0.0168235	0.0294981	-0.0165287	-0.0280623	0.0227995	0
242.2	-0.00196071	0.00214303	0.0251264	-0.0338988	0.0191393	0.0288715	0.024627	0.0110235	-0.00353203	-0.00549048	0
242.4	-0.0230824	-0.0320502	0.020374	-0.0599789	0.0294611	0.0272527	0.00690497	0.0369708	0.0244144	-0.0176678	0
242.6	0.00725216	-0.0157884	-0.0153466	0.0352419	0.0129104	-0.00012646	-0.0194466	-0.0177821	0.00404255	0.0354921	0
242.8	0.0378332	0.0184981	0.00269513	0.00928042	-0.0346155	-0.00944348	0.0237689	0.0114338	-0.00403094	-0.018109	0
243	0.0141692	0.0184565	0.0449839	0.0443708	-0.00313688	-0.00560144	-0.0444644	0.0241474	0.00855644	0.0092325	0
243.2	0.0080709	0.00848217	0.0458606	0.0204982	0.00800266	0.00747996	-0.00853662	0.0111037	-0.00848447	0.00504516	0
243.4	0.00245197	0.0300259	0.00418109	0.0151857	-0.0175387	-0.00134695	0.0416408	-0.04027	-0.011081	-0.0106902	0
243.6	-0.00829558	0.0427674	-0.0245546	0.0236155	-0.0100895	-0.00961073	0.00707051	-0.0625843	-0.00200582	-0.00563028	0
243.8	0.00657816	-0.00996923	-0.0118925	-0.0360497	0.0233161	0.0160079	-0.00852547	0.000571231	-0.011307	-0.0113375	0
244	0.00640698	-0.0676367	-0.0100427	-0.0260776	0.00597485	0.0221782	-0.000191869	0.0457942	-0.00589315	-0.00443502	0
244.2	-0.0314296	-0.0334751	-0.0511432	0.0611219	-0.0440428	-0.02145	-0.0280241	0.0137955	-0.0135748	-0.0202604	0
244.4	-0.00194355	-0.0237672	0.0226259	0.0313117	-0.0128864	-0.00504835	0.0130297	-0.0128376	0.023309	-0.00824098	0
244.6	0.0441333	-0.0145458	0.00943649	-0.0212045	-0.0151658	-0.00469038	0.045191	-0.0533756	0.000438258	0.0141854	0
244.8	0.000464991	-0.0193042	-0.0283742	-0.032164	-0.0167405	-0.0207686	0.0276579	-0.0501579	-0.0281538	-0.0123393	0
245	-0.0376816	-0.00370711	0.0214162	-0.013029	-0.01949	-0.0258838	0.0169122	0.0193601	-0.0138206	-0.0217522	0
245.2	0.00639229	0.053197	0.0249634	0.0163492	-0.0605656	-0.0305061	0.00776016	0.0332881	-0.00862238	0.0323101	0
245.4	-0.022587	0.00635088	-0.0326367	-0.00218603	0.0112011	0.00232675	-0.038357	-0.0392368	0.0177102	0.0171614	0
245.6	0.0143374	-0.0435511	0.00453122	-0.0161023	0.0278211	-0.00127116	-0.000599849	-0.0101828	-0.000658083	0.00492247	0
245.8	0.00915093	-0.0102963	0.0326677	-0.0846769	-0.0158277	-0.0252464	-0.00197267	0.0183048	0.0277281	-0.00408006	0
246	-0.00852094	0.0226763	-0.0167799	-0.0519148	-0.000776113	0.00218169	-0.0083301	0.0401868	0.0157593	-0.012879	0
246.2	-0.00570959	0.0218876	-0.0373194	0.00369706	0.0224919	0.0252442	0.0122435	-0.000130057	0.00265754	0.00862338	0
246.4	-0.00563663	0.0244212	0.00269303	0.0113316	0.00648385	0.0223232	0.00595284	-0.0501499	0.0225111	0.017847	0
246.6	0.00802303	0.00781455	0.00753509	0.0713261	0.0337086	0.0532732	-0.0233805	0.0238404	-0.0214698	-0.0336351	0
246.8	0.031333	-0.0471411	0.0189778	-0.00917142	0.0486797	0.0202773	-0.0158198	0.016497	-0.018262	-0.0296277	0
247	0.0381061	-0.0162426	0.00402036	0.0049272	0.0305358	-0.0172121	0.024582	-0.0202488	0.00117429	0.00747904	0

## Sheet: fly2
Time	gamma-L5	gamma-L4	gamma-L3	gamma-L2	alpha-L	gamma-R5	gamma-R4	gamma-R3	gamma-R2	alpha-R	stimulus			Time	gamma-5	gamma-4	gamma-3	gamma-2	alpha	stimulus
0											0			0	0.0121637	0.0117124	-0.000268321	-0.00509883	0.000790223	0
0.2											0			0.2	0.00573114	0.0156403	0.00144875	-0.00196725	0.00182898	0
0.4											0			0.4	-0.00554748	0.0105569	0.0105554	-0.0094664	-0.0030813	0
0.6											0			0.6	0.00881271	-0.0154677	0.0122141	-0.00604541	-0.00209978	0
0.8											0			0.8	0.0141652	0.00106726	-0.000365827	0.0207171	0.00208974	0
1											0			1	-0.000599751	-0.00456041	-0.0123594	-0.000872869	0.00751343	0
1.2											0			1.2	-0.014886	-0.0137625	0.00358823	-0.0081963	-0.0120318	0
1.4											0			1.4	-0.000706328	0.0021352	-0.00417675	0.00540402	-0.00116704	0
1.6											0			1.6	0.01413	-0.00504506	-0.0124341	0.029702	0.0151042	0
1.8											0			1.8	-0.00268577	-0.00112875	-0.00161612	0.0179616	-0.0163149	0
2											0			2	-0.00448937	-0.00747973	-0.00720456	-0.00924201	-0.0172835	0
2.2	0.0212247	-0.0159023	0.0112785	-0.0416691	-0.00637554	0.0175941	0.0449119	0.0212059	0.0213331	-0.0373036	0			2.2	-0.00816115	-0.0217083	0.00258109	-0.00710862	0.00434646	0
2.4	0.014219	-0.0237709	0.00147538	-0.0470419	0.00287925	0.0233686	0.0206864	-0.0511229	0.00494495	0.0148954	0			2.4	-0.00730947	-0.00680039	0.00297136	0.00803943	0.00964196	0
2.6	-0.0111873	-0.0480272	-0.0146721	-0.0215112	0.00471717	0.00883943	0.00282046	-0.00813881	-0.020192	0.059696	0			2.6	-0.0037436	0.00203397	0.00784347	0.00682627	0.00300945	0
2.8	0.00991503	-0.0551483	-0.0104352	-0.03338	-0.00838682	-0.0208131	0.0167289	0.0201171	-0.0295554	-0.00660914	0			2.8	-0.000314509	-0.0054429	-0.0015726	-0.0138462	-0.00651568	0
3	0.0351275	-0.0231102	-0.00675003	-0.013709	0.0441458	0.000349068	0.0418897	0.00165879	-0.00960609	0.00807464	0			3	0.00059998	-0.00154523	-0.00363962	0.00588129	0.00892946	0
3.2	0.00122543	-0.00241403	0.00550464	0.00737612	0.0145923	0.00587904	-0.00986869	0.00990129	-0.0279193	-0.0102636	0			3.2	0.00369927	0.0124254	-0.0174776	-0.00690919	0.0236097	0
3.4	0.0075066	0.013256	-0.0336761	0.00711298	-0.0115047	-0.0133563	-0.0635099	0.0215825	-0.0439146	-0.000292636	0			3.4	0.00534433	0.0178095	-0.0252461	-0.00659606	0.0138034	0
3.6	0.0126637	0.0194953	-0.0387673	0.00169259	0.00489888	-0.00703435	-0.0506756	0.00425102	0.00296451	0.0507597	0			3.6	0.00571098	-0.001433	0.0064789	0.0135542	-0.000371594	0
3.8	-0.0424213	-0.0133179	0.0218886	-0.0139885	-0.0157253	-0.00110378	-0.0125161	-0.00628271	0.0652682	0.0141305	0			3.8	0.00467201	0.00249237	0.0204235	0.00437477	0.0026579	0
4	-0.00901179	-0.0380416	-0.0287883	-0.0301474	-0.00667599	-0.0379893	0.0225598	-0.00229788	0.0648031	-0.0372097	0			4	-0.00293014	0.0332804	-0.000835036	-0.0151271	0.000493844	0
4.2	0.000746134	0.0110457	-0.0285255	0.0276353	0.00362306	-0.00153107	0.0255063	-0.0183813	0.0284149	0.0229733	0			4.2	-0.0154821	0.013845	0.000645011	-0.0122375	0.00432846	0
4.4	-0.025069	0.0391658	-0.019133	0.0045254	-0.0142398	0.0380348	-0.025379	0.00213976	0.024502	-0.000446645	0			4.4	-0.00662605	-0.0118163	-0.00183145	-0.0121281	0.000608738	0
4.6	0.00488028	-0.0291662	-0.00225418	-0.037273	-0.0118809	-0.00969031	0.00115635	-0.00490039	-0.020923	0.0112168	0			4.6	0.00216147	0.00376771	-0.00976574	-0.0109734	-0.0108881	0
4.8	0.015478	-0.0221889	0.0260753	-0.0100274	0.00129866	-0.00187625	0.0432904	-0.0144288	-0.023746	0.0330003	0			4.8	-0.00693279	-0.0119847	-0.0143858	-0.00377288	-0.0100744	0
5	-0.0136797	0.0647917	0.00955377	0.0194529	-0.00316917	0.0412493	-0.00321135	0.0169954	-0.00850148	-0.000303387	0			5	-0.0182739	-0.0128533	-0.0103315	-0.0188864	-0.00701207	0
5.2	0.00722325	0.0264302	-0.0282772	0.00246496	-0.00562451	-0.0205255	-0.0418585	0.0384455	-0.0815587	-0.00531299	0			5.2	1.63815e-05	-0.0187791	0.00671917	-0.0136352	0.00954455	0
5.4	0.00899262	-0.0356635	0.0295246	0.0266453	0.000676435	-0.00214061	0.00887807	0.0328362	-0.0404176	-0.0114718	0			5.4	0.0142129	-0.0117846	0.0150284	-0.0031159	0.0131854	0
5.6	0.034969	-0.00652383	0.0321544	0.0244758	0.0120274	-0.0113437	0.0417645	0.00287246	0.0153059	0.00920075	0			5.6	0.00657406	-0.00621501	-0.00414099	0.0148968	-0.0106956	0
5.8	0.0285566	0.030377	0.0129479	-0.0179369	0.00721718	0.0171023	0.038322	-0.0404646	0.00187374	-0.0235512	0			5.8	-0.00373328	-0.0070114	0.00352492	0.000739113	-0.00449198	0
6	0.0232236	0.0122902	0.0184395	0.00259093	0.0224385	0.0189365	0.0176441	-0.042504	0.0170208	-0.00814345	0			6	0.00829117	0.011891	-0.00479312	-0.00364086	0.0114066	0
6.2	0.00919932	-0.02892	0.00204949	0.0243728	0.030714	-0.0114701	-0.00292175	-0.0266492	0.0312983	0.0283551	0			6.2	0.00392372	0.0143173	-0.0109928	0.0153922	0.00204964	0
6.4	-0.0210674	-0.0375454	-0.0158159	-0.00362271	0.0161213	-0.000128926	-0.00927425	-0.0340526	0.0302657	-0.00646907	0			6.4	0.00550086	0.00966384	0.0129172	0.0257358	-0.00746425	0
6.6	-0.0128261	0.00286067	0.00827814	0.0306335	0.0173235	0.0192086	-0.00687318	-0.0216425	0.09043	-0.0195156	0			6.6	0.013392	0.014762	0.0249228	0.0271603	-0.0124442	0
6.8	-0.0235688	0.061701	-0.0514955	0.0462035	-0.025518	0.00351158	-0.0188938	0.0152395	0.0197384	0.00471083	0			6.8	0.00316924	0.0075787	0.0161666	0.0124676	-0.00708401	0
7	0.019844	0.0694267	0.0130635	0.016948	-0.00270894	-0.0158924	-0.0227022	0.0168347	-0.0271082	-0.0373473	0			7	0.0120074	-0.00823106	0.0102734	0.0021861	0.0049243	0
7.2	0.0081064	0.00774679	0.0195417	-0.0566019	0.00465226	-0.0326852	-0.00898448	-0.0294598	0.00188711	-0.0502529	0			7.2	0.0247724	0.00491982	-0.00838933	0.00123061	0.0237192	0
7.4	-0.0267216	-0.0141045	-0.00224897	-0.0552986	-0.00830769	-0.0298142	-0.0317941	-0.0306659	-0.0359464	0.00206362	0			7.4	0.0442588	0.0432781	0.00630366	0.0218112	0.0219922	0
7.6	-0.0159656	0.00824308	0.0385004	-0.0185349	-0.0190779	-0.0183481	-0.0424493	-0.00592082	-0.0550762	0.0322211	0			7.6	0.0322893	0.034387	0.0281041	-0.00197314	0.0265216	0
7.8	0.00413904	-0.00356986	0.0388259	-0.0306865	-0.0183614	-0.01991	0.0103849	-0.0115068	0.0169589	0.0195463	0			7.8	0.0197568	0.0123481	0.0156327	0.00794978	0.0388712	0
8	0.0065133	0.0041184	-0.00814188	0.0212588	0.0234316	-0.0144614	0.0217475	0.0152799	-0.054338	0.0341281	0			8	0.039416	0.0108953	-0.000472144	0.0296463	0.0303113	0
8.2	-0.018068	0.026931	0.0268861	0.0154756	-0.0259912	-0.0107228	0.0284981	-0.0257862	-0.050459	0.0128506	0			8.2	0.0459359	0.0229175	0.0128594	0.0145735	0.0200879	0
8.4	0.0253409	-0.0115412	0.00478312	-0.00191139	-0.00148895	0.0228049	0.0184994	-0.00512182	-0.0238508	-0.0394482	0			8.4	0.0298601	0.0467167	0.0140323	0.0238813	0.0217556	0
8.6	0.0469631	0.00847974	-0.0374984	-0.00302825	0.0217944	0.0234707	0.0215643	0.00734936	0.00730056	-0.0340777	0			8.6	0.0187558	0.0182635	-0.000483626	0.029194	0.026979	0
8.8	-0.00374652	-0.0143136	-0.0255958	0.0331107	0.00991209	0.00063113	0.0107678	-0.0237445	0.0192582	0.0297272	0			8.8	0.026246	0.0266155	0.00730044	0.0119149	0.0250384	0
9	-0.0356816	-0.0656354	-0.0111051	0.0523486	0.0142677	0.0092617	-0.032503	-0.0398057	0.00585957	0.0287012	0			9	0.0388869	0.038956	0.0326546	0.00743937	0.00376185	0
9.2	-0.00741763	0.00316317	-0.0229795	0.00561321	-0.00359251	0.0199452	-0.028629	-0.0114915	0.00251798	-0.0367359	0			9.2	0.0435499	0.035174	0.037419	0.0140448	0.00907367	0
9.4	-0.0107713	-0.0541426	0.0142844	0.0152378	-0.0436977	-0.00771505	0.0320929	0.0552455	-0.0043297	0.0166663	0			9.4	0.0451	0.0177443	0.0424906	0.0323636	0.0180994	0
9.6	-0.0278909	-0.0141274	0.0011157	0.017578	0.00153748	-0.00791734	-0.0282773	0.021329	0.0416535	0.0128374	0			9.6	0.0371152	0.00973649	0.0353085	0.0214502	0.00921774	0
9.8	-0.00626882	0.0371649	0.0213866	-0.0159152	0.0156766	0.0307205	-0.0177213	-0.013536	0.00561303	-0.00426142	0			9.8	0.0309477	0.0205712	0.0245365	0.0337224	0.0209428	0
10	0.00487307	0.0519454	0.0204233	-0.0223404	0.0073929	-0.00300191	-0.0032314	0.0430263	0.00649058	-0.0115906	0			10	0.0538819	0.0445185	0.0404877	0.0305323	0.00198246	1
10.2	-0.011402	0.0125651	-0.00273939	-0.00116613	0.00654866	-0.0332312	-0.00710531	0.0781319	0.0369777	-0.0189403	0			10.2	0.106893	0.0661824	0.064177	0.0531768	0.0332315	1
10.4	-0.0205817	-0.0229181	0.00869706	-0.00432816	0.00232198	0.015831	0.00490671	0.0175111	0.00982765	0.00652213	0			10.4	0.134251	0.0754538	0.0707443	0.0572492	0.0470011	1
10.6	-0.0205948	0.0348763	0.00358772	-0.0190221	0.00693782	0.00528808	-0.0416786	-0.0219613	0.0226795	0.0459167	0			10.6	0.132947	0.0823267	0.0743079	0.0468069	0.0211354	1
10.8	-0.00131696	-0.00993353	0.00173575	-0.0169018	-0.0249317	-0.00072041	0.0360543	-0.0295094	-0.00758745	0.00208997	0			10.8	0.120839	0.0694929	0.0728258	0.0477874	0.0262659	1
11	-0.013746	0.00313949	-0.0201069	-0.012528	0.0130324	0.0170413	0.0394065	0.0128592	0.00588935	-0.0160074	0			11	0.112552	0.080135	0.0681408	0.0505013	0.025063	1
11.2	-0.000501375	0.0224124	-0.0158969	0.00342301	0.0066432	-0.0298375	-0.0108109	0.00838983	0.0334732	0.00882086	0			11.2	0.101207	0.0952002	0.0504452	0.0213412	0.0270614	1
11.4	0.0248583	-0.0273327	-0.0163934	0.000797184	-0.0246306	-0.0265713	0.00760431	-0.0119601	0.00627044	0.0404928	0			11.4	0.0835055	0.0722548	0.0561849	0.0129009	0.0120899	1
11.6	0.00451599	-0.0557613	-0.0169663	-0.00686764	-0.00684306	0.0406145	0.0550947	0.00945231	-0.0223045	0.01294	0			11.6	0.0672208	0.0743011	0.0521018	0.0221768	0.0130926	1
11.8	-0.0156032	-0.015073	0.00895573	0.0116832	0.00838697	0.0300878	0.0282942	0.0338095	-0.0217356	-0.0540202	0			11.8	0.0542125	0.0716994	0.039446	0.0142033	0.0141314	1
12	0.0322449	-0.021623	-0.0156376	0.00439634	-0.00821217	0.0143576	-0.0112034	0.037581	-0.0753762	-0.0328554	0			12	0.050771	0.0545928	0.0381275	0.00885372	0.00304977	1
12.2	0.0302254	-0.0188472	-0.0223885	0.000483238	-0.0103172	0.0419277	0.0238985	0.0177858	-0.027552	-0.0249498	0			12.2	0.0513667	0.0515915	0.0341196	-0.00270057	0.0159381	1
12.4	0.00378814	-0.000935292	-0.00161329	0.0179793	-0.00637138	0.0246255	-0.00476078	-0.0149997	0.0767389	0.0276661	0			12.4	0.0401611	0.0435689	0.0378449	0.015748	0.0294492	1
12.6	0.00574253	-0.00579243	0.0203519	0.0206064	-0.00503935	-0.0138003	-0.0357517	-0.0248511	0.02671	-0.0123478	0			12.6	0.0336175	0.0403065	0.0465726	0.024056	0.00483335	1
12.8	0.0151219	-0.00128747	0.0110942	0.00397192	-0.0087803	0.0135564	-0.0104913	-0.00215304	-0.0247507	-0.0426029	0			12.8	0.0344968	0.0421098	0.035725	0.0121083	0.00879075	1
13	0.0170015	0.0104556	0.00187084	-0.0118213	-0.000672479	0.0322429	-0.0117007	0.0103673	0.0235383	0.0105554	0			13	0.0292494	0.0312199	0.0401698	0.0152434	0.0210364	0
13.2	0.0216684	-0.0126912	0.0289855	-0.0208997	0.0172046	-0.0276293	-0.0466485	-0.00262997	-0.0160834	0.000160811	0			13.2	0.0208187	0.0241412	0.0212876	-0.00587897	-0.00514736	0
13.4	-0.00240873	0.0105175	0.0115193	-0.00471956	-0.00638895	0.0135274	0.0150939	0.0110441	-0.00650419	0.0574178	0			13.4	0.0192662	0.0305415	0.0125969	0.00696282	-0.0055745	0
13.6	0.0187385	0.0330164	-0.0171251	0.0140403	0.00450176	-0.0356345	0.0479123	-0.0102546	0.0243206	0.0379607	0			13.6	0.0222779	0.0512558	0.0201421	0.0239243	-0.0017596	0
13.8	-0.0149128	0.0290925	-0.0087285	-0.0370596	0.0118635	-0.0352764	0.0139023	-0.00942562	0.0295427	0.0211666	0			13.8	0.00486965	0.0291077	0.00904477	0.0266652	-0.00923705	0
14	-0.00170747	0.0169165	-0.00497986	-0.0108372	0.0145228	-0.0160617	-0.0408917	0.0102373	0.00876725	-0.0131201	0			14	0.0133572	0.0206704	0.0116606	0.0256649	-0.00926747	0
14.2	0.0345177	0.00454036	8.38267e-06	0.0439199	0.0139692	-0.0157675	-0.0283037	0.0337157	-0.00368588	-0.0397965	0			14.2	0.00455399	0.0120401	0.0243074	0.00232137	0.0163768	0
14.4	-0.00509241	-0.00115275	0.0106853	-0.00667945	-0.00473754	-0.00970251	0.0314552	0.027697	0.00273433	-0.000386042	0			14.4	-0.0124063	0.0078445	0.0240151	-0.00479972	0.0120512	0
14.6	-0.0077661	0.00535672	-0.0092975	-0.00770902	-0.0125583	-0.0515294	0.000738115	-0.0525858	-0.0137817	0.0195967	0			14.6	-0.00840872	0.027401	0.0295856	0.0137724	-0.0252291	0
14.8	-0.0331833	-0.0165947	0.0561934	0.0288094	-0.00138861	-0.0183541	-0.0443533	-0.0650272	-0.0587975	0.0235171	0			14.8	0.000548223	0.0257692	0.00773974	0.0142324	-0.0105915	0
15	-0.0171287	0.00756449	0.0270603	0.00768032	0.0021489	0.00754808	0.038933	-0.0352794	-0.0234006	-0.0412017	0			15	-0.00399934	0.0126157	0.0137087	0.00499021	0.0114357	0
15.2	0.016757	-0.00445449	-0.0037474	-0.00286937	0.00592659	-0.00949621	0.0454898	0.00233023	0.032471	-0.00434928	0			15.2	0.00257036	0.0257492	0.0022843	0.0129474	-0.0104232	0
15.4	0.0177883	-0.0478218	0.0217286	-0.0155152	0.0159109	-0.0193331	-0.0524719	-0.0197346	-0.00116804	0.0439476	0			15.4	-0.0132973	0.00414559	-0.00919399	-0.0116243	-0.0194985	0
15.6	-0.00633893	-0.0276677	-0.00255798	-0.0162168	0.0295917	-0.00475587	-0.0700589	-0.0348637	-0.0323991	-0.00493874	0			15.6	-0.000251735	-0.00939617	0.00325085	-0.0221762	-0.00716673	0
15.8	-0.0231209	0.0300889	-0.0706897	0.0288106	0.0272656	-0.00629042	-0.00754485	0.0337423	0.0235474	-0.0252473	0			15.8	-0.00104768	-0.01243	-0.00701971	0.0257573	0.00083566	0
16	-0.0279137	0.0165504	-0.0308387	-0.0020507	-0.0167394	-0.0144064	-0.0265205	0.0265934	-0.000801309	0.00171776	0			16	-0.0178729	-0.00113625	0.0102852	0.025989	-0.00217903	0
16.2	-0.0182035	0.000177306	0.00253453	-0.00724104	-0.0305969	0.0362756	-0.00615636	0.00603231	0.000196762	-0.000487409	0			16.2	0.000596254	0.0243674	0.0156978	-0.00917636	-0.020289	0
16.4	0.00240003	0.0170465	-0.0227775	-0.00942089	0.00470358	0.0166485	0.0476881	-0.0272359	0.0423117	-0.0363286	0			16.4	0.0152786	0.0199976	-0.0141142	-0.0121685	-0.0128795	0
16.6	0.015842	0.0156435	-0.0137131	-0.0311524	0.0147193	0.0100428	0.0264117	-0.036897	0.000437272	-0.0164714	0			16.6	-0.0076698	0.00694034	-0.00313288	0.0106792	0.00255184	0
16.8	0.0128476	0.000368228	0.0143332	-0.0325875	-0.00402272	0.032454	0.00882604	0.000156207	-0.0520529	0.0219394	0			16.8	-0.0140661	0.00783521	0.00314821	-0.00122007	-0.00678671	0
17	0.0163839	0.00409805	0.00339662	0.0139776	-0.00920432	0.0202814	0.0328067	0.0329795	-0.00647822	0.0171089	0			17	-0.0179116	-0.0148663	0.00293458	-0.0144162	-0.0101029	0
17.2	0.0274016	0.00157904	0.0032762	0.0378857	-0.00758526	0.0158521	-0.0114119	0.0220926	0.0138923	0.0179511	0			17.2	-0.0227824	-0.0384519	-0.00244829	-0.0115964	-0.0026205	0
17.4	-0.00973935	-0.0083144	0.0165691	-0.0315681	0.00255581	0.00767331	0.00528946	0.0260148	-0.0363389	0.00905928	0			17.4	-0.0190784	-0.0181	-0.0012926	-0.0068117	0.00203876	0
17.6	-0.0191852	0.00366486	0.0280027	0.014928	-0.0150121	0.0106298	0.0388645	0.0524892	0.0224022	0.00925664	0			17.6	-0.0136633	0.00422654	-0.0147703	0.0193579	0.0104999	0
17.8	-0.0107282	-0.00996878	0.0132219	0.0651753	-0.0207678	0.0138516	0.0844376	0.0275314	0.00545658	0.0151933	0			17.8	-0.00608156	-0.00663155	-0.0156865	0.013362	-0.00181793	0
18	0.00934391	-0.00946656	0.00435754	0.00519887	-0.0123069	0.025149	0.0125923	-0.0156727	0.0113082	-0.00120294	0			18	-0.000624835	-0.000924537	-0.0248718	-0.021265	-0.00203812	0
18.2	0.00818445	0.02846	0.00919168	-0.0257404	-0.00940235	0.0181617	-0.0569613	0.0238923	0.0566487	-0.037901	0			18.2	0.0014892	-0.00257657	-0.0181812	-0.0220269	-0.00082111	0
18.4	-0.00825901	0.0231685	0.0017193	0.0324575	-0.00393421	-0.012785	0.0235066	0.0891444	0.00256227	-0.0416521	0			18.4	-0.000146302	-0.00356584	-0.00507857	-0.0177115	-0.0028991	0
18.6	0.02958	-0.0374617	-0.00744824	-0.00743101	0.0105905	-0.00845165	0.0157989	0.0218731	-0.0132247	0.00163456	0			18.6	-0.00671705	0.0233441	-0.00640357	-0.0115779	-0.00615348	0
18.8	0.0123789	-0.00856681	-0.0270139	-0.036649	0.0169591	-0.0208317	-0.0319785	-0.0403011	0.00500833	-0.00519051	0			18.8	-0.0204471	0.00490211	-0.00272167	0.00123759	0.00992832	0
19	-0.0104765	0.0112007	-0.0586556	0.0164561	0.00406945	-0.0260735	-0.045154	0.000825504	-0.0337103	0.00286177	0			19	-0.00662044	0.00375754	-0.0180381	0.00309292	0.0143244	0
19.2	-0.0135144	0.00379169	0.0204262	0.00157212	-0.0208889	0.00822558	0.00344354	-0.0320649	-0.041294	0.0314504	0			19.2	0.00428901	-0.00312202	0.0129396	0.00163962	-0.00656725	0
19.4	0.0123846	0.0140691	0.0619703	-0.0406197	-0.00813695	0.0174045	0.00364493	-0.0436714	-0.0149402	0.015221	0			19.4	0.0034905	-0.0226918	0.0121566	-0.0098465	-0.00811373	0
19.6	0.0247971	0.023709	-0.00800048	-0.00469386	0.0245394	-0.0110071	-0.0489017	-0.0116014	-0.00748872	0.0002656	0			19.6	0.00326406	-0.00935114	0.00185728	0.00513726	-0.00174222	0
19.8	0.00716855	0.00375319	-0.0182765	0.0214713	0.0207207	-0.012988	-0.0362002	-0.0761825	-0.00556858	0.0447489	0			19.8	0.00987737	-0.0180323	0.0181936	0.00314014	0.001237	0
20	0.0423304	0.00731928	-0.0250673	-0.0193924	0.0234259	-0.0223123	-0.0251915	-0.0273345	-0.0140815	0.0226617	0			20	0.0142368	-0.031944	0.000297685	0.00305138	-0.0035928	0
20.2	-0.0108733	0.0344591	-0.0282176	-0.0149222	-0.00137367	-0.0233301	-0.0374843	-0.0349642	0.0220432	-0.00612284	0
20.4	-0.0239318	0.0564361	0.0338226	-0.0076871	0.0053631	-0.0136496	-0.0226979	-0.0403466	0.036448	-0.0238798	0
20.6	-0.0267305	-0.0227533	0.040853	0.00220967	-0.0099018	-0.0263087	0.00306557	0.00992152	0.0120241	0.00266322	0
20.8	-0.0397251	-0.0722922	-0.0017381	0.00668158	-0.0129663	-0.0142754	0.0318587	0.0370149	-0.0201163	0.0137684	0
21	-0.0265944	-0.0261988	-0.0176993	-0.0129459	0.0187638	0.0199694	0.0511829	0.0161827	-0.00590052	-0.0205	0
21.2	-0.022816	-0.0377886	-0.0375591	-0.0187603	-0.0173452	-0.0102655	0.0230847	0.0230315	0.0353019	-0.0192034	0
21.4	0.00473174	0.0394667	0.0280331	0.00391271	-0.031503	-0.00317134	0.0085004	0.0181081	-0.03985	-0.0316734	0
21.6	-0.0112315	-0.0224484	0.0489856	0.0639559	-0.0406605	0.0218831	0.0174251	0.00532951	0.00804396	-0.00249771	0
21.8	-0.0227299	-0.0858566	0.0443306	0.0431214	-0.00523751	0.0267021	0.0180116	-0.00409873	0.0172652	0.00274266	0
22	-0.019514	-0.0402223	0.0201098	-0.0130911	0.0115912	0.00664014	-0.0175594	-0.0123771	0.0219511	-0.019636	0
22.2	-0.00564669	-0.0329832	-0.0328807	0.0177343	-0.0017023	-0.00800136	-0.0352096	0.0099905	0.0373772	-0.02117	0
22.4	0.0174307	-0.0581182	-0.0561445	0.0586731	0.0152472	0.00814074	0.015473	0.0671736	-0.0196169	-0.00333137	0
22.6	0.0148388	0.0708763	-0.0216836	-0.0275672	0.0169093	0.0298826	0.0584549	0.0403435	0.0153764	0.00922856	0
22.8	0.0403457	0.00984359	-0.011523	-0.0400837	0.015496	0.0148102	0.0410793	-0.109287	0.0672374	0.00807864	0
23	-0.000880805	0.0207134	0.0199951	-0.0339633	0.00209239	-0.00914151	-0.00562975	0.0195627	0.00527999	-0.0018094	0
23.2	-0.00780974	0.0108233	0.00294051	-0.0407923	0.00622866	-0.0233015	-0.0161659	0.0152565	-0.0413871	-0.02132	0
23.4	0.017637	-0.0229281	-0.0226581	-0.0207306	0.0134658	-0.00582888	-0.0538648	-0.0465778	-0.0349652	-0.0084057	0
23.6	0.0129607	0.0207152	0.00254893	0.00767377	0.00193565	0.00154421	-0.0671292	0.0369189	-0.0542812	0.0166994	0
23.8	0.0189583	0.0402765	0.0118649	-0.00556868	0.00100156	-0.0334578	0.0276047	0.00126823	-0.0708806	-0.0128914	0
24	0.00889505	0.0158299	-0.00663175	-0.0189103	0.00994391	-0.000393791	-0.0042486	0.0457069	-0.0281742	-0.0187157	0
24.2	-0.00694825	0.000897238	-0.0638081	-0.0179081	-0.014799	0.0173291	0.0181554	0.0186698	0.0110405	0.0372356	0
24.4	-0.00755555	0.00659526	-0.00577756	0.0203537	-0.0211634	-0.0214131	0.00666415	-0.0199315	0.0400401	0.0208071	0
24.6	0.0165624	0.0262267	0.0505239	0.0235117	-0.0159664	-0.00475608	-0.00939217	-0.051958	0.043854	0.00891695	0
24.8	0.0307899	0.0547416	0.0146948	-0.00172144	0.000391231	0.0359235	-0.0222872	-0.0117412	0.013542	-0.0121244	0
25	0.0139139	0.0278015	-0.0136449	-0.00478757	0.00680724	-0.00537963	-0.0238575	0.0615884	-0.00761242	-0.0377684	0
25.2	-0.00491769	-0.0546305	0.0112119	-0.00266894	-0.0294913	-0.0236187	0.0679388	-0.0106511	0.0145681	0.0670508	0
25.4	-0.0259963	0.0272442	0.0457105	0.0527489	0.0204952	0.0572104	0.03982	-0.0145797	0.0164355	0.0196536	0
25.6	-0.00792123	0.0324454	-1.99238e-05	0.00404891	0.00764845	-0.0022737	-0.0442253	0.00720034	-0.015519	-0.00899299	0
25.8	-0.00777421	-0.00544829	0.0200937	0.00488235	-0.00479214	-0.00928152	-0.0297201	-0.0208641	-0.00596785	0.0126245	0
26	-0.0313597	-0.022506	0.0281705	0.0215911	-0.00725241	0.0356834	0.0317303	-0.00854048	0.000847021	0.057375	0
26.2	-0.0131942	-0.0255697	-0.0243904	-0.0397409	-0.0188256	0.00411414	0.0171746	0.0240958	-0.026443	0.0539179	0
26.4	0.0220627	-0.00951017	-0.00998617	-0.0654242	-0.00777264	-0.0306673	-0.0018334	-0.0102129	-0.0163841	-0.0175618	0
26.6	-0.00977138	0.000854687	0.00880786	-0.000154129	-0.0089142	-0.0118756	0.0789499	0.00117469	0.0241697	-0.0156511	0
26.8	0.0233848	0.00588052	-0.0121798	0.0357675	0.0172892	-0.00936328	0.0114624	-0.0205635	0.0182584	-0.026559	0
27	0.0103792	-0.00397313	-0.0187168	0.0108466	0.0401544	-0.00561758	-0.019337	-0.00543339	-0.0123583	-0.00880119	0
27.2	0.0123819	0.00121534	-0.0148788	-0.00229941	0.00424057	-0.0109837	0.00570713	-0.00349027	0.0389555	-0.0235895	0
27.4	0.0353111	0.00829013	-0.019951	-0.00293009	-0.018962	-0.0116323	-0.0189237	-0.0414284	0.0647203	-0.0469796	0
27.6	0.00363087	0.00508758	-0.0200289	-0.00457957	0.00417908	0.00112876	-0.0312948	-0.0295322	-0.0297823	-0.0278738	0
27.8	-0.0259742	0.0067482	-0.00825691	0.0163149	-0.00226467	0.00127917	0.0246366	0.041399	-0.0639565	-0.0148656	0
28	0.00407859	-0.0290279	-0.00463511	0.00089845	0.0118304	0.0136928	-0.0236192	0.0366165	0.030108	0.00613834	0
28.2	-0.0212113	-0.0354857	-0.0026014	0.00175027	0.0178509	0.0106731	0.00697213	0.0393017	-0.00316019	-0.0166396	0
28.4	-0.00284881	0.00779645	-0.00253184	0.0141477	-0.00329052	-0.0103197	-0.0498073	0.0247911	0.002133	0.0159053	0
28.6	-0.000548294	-0.0294399	0.00618859	0.0352343	-0.00300642	0.0215801	-0.0256292	0.0308471	-0.0183483	0.0168897	0
28.8	-0.0166022	-0.0749892	0.0137496	0.0361836	-0.0039266	0.0456012	0.0615393	0.0098358	-0.0287544	0.00684183	0
29	0.00801395	0.0198685	0.000684747	-0.00338041	-0.0191803	-0.0100924	0.00897015	-0.0626314	0.0216437	0.0415257	0
29.2	-0.0174619	0.0742374	-0.000607949	-0.0227984	0.0141286	-0.02265	-0.0309503	-0.0385421	-0.074215	-0.00970166	0
29.4	-0.0174314	-0.045617	0.0492671	0.00538214	-0.0140962	0.00860365	-0.0950847	-0.0115458	-0.0143023	0.0164137	0
29.6	-0.0202885	-0.0171874	0.0302511	0.00701816	0.00513446	-0.0182988	-0.00650074	-0.00803868	0.0351581	0.000926989	0
29.8	-0.0209136	0.0171024	0.00217372	-0.0142235	-0.0163194	-0.0573793	-0.00190929	-0.0141284	0.00366424	0.0118899	0
30	-0.00108695	0.0192057	0.00684962	-0.0315884	-0.0149621	-0.0377771	-0.0104368	-0.0445594	-0.0300493	-0.0031038	0
30.2	0.00999252	0.0496077	-0.0066407	-0.0358136	0.0222302	0.00490091	0.0204415	-0.0385977	-0.0201828	-0.0440362	0
30.4	-0.00399256	0.0440604	-0.027914	-0.0360704	-0.0165015	0.016422	-0.0509677	0.034429	0.0121918	-0.00220212	0
30.6	0.00058764	0.0405696	-0.00320676	-0.0397175	-0.00183651	0.0253625	0.0020552	0.0153388	0.0367493	-0.00468371	0
30.8	-0.0118097	-0.0174624	-0.0406917	0.0177255	0.0229357	0.00704748	0.0434321	-0.0321007	0.018246	-0.0147497	0
31	-0.00864307	-0.0360018	6.06562e-05	0.0259464	0.00755502	-0.00737815	0.0281835	-0.00601129	0.0125353	-0.0246686	0
31.2	0.00087176	0.00141901	0.0129574	0.0135273	0.0136508	-0.00141558	-0.038396	0.000610681	0.0300985	-0.0384028	0
31.4	-0.0078418	0.000797772	-0.0171778	0.0133883	0.0142297	-0.0188065	-0.0181966	0.0110553	0.0109763	0.00433068	0
31.6	-0.0140497	-0.0381321	0.00553288	0.0157539	-0.00748884	-0.0368145	0.0532008	0.0523161	-0.0166389	0.0459305	0
31.8	0.00566883	-0.0183885	0.0182574	0.0349012	0.0237136	0.00103173	-0.031239	0.0147623	0.0353198	-0.0185061	0
32	0.0126114	-0.000971303	0.00502604	0.026673	0.0149525	-0.00658636	-0.0426183	0.010461	0.0573599	0.00121017	0
32.2	-0.00383399	-0.0333891	-0.0216638	0.052772	-0.0190953	0.0327255	0.0435238	0.0245259	-0.0145216	-0.0141122	0
32.4	0.00944991	-0.00421336	-0.0116825	0.0225784	-0.0282262	0.0298568	0.0429555	0.0193215	-0.021807	-0.0271993	0
32.6	0.0106312	0.00607161	-0.02106	-0.00270331	-0.0247679	0.0173239	-0.012898	0.00866984	-0.0399387	0.00415449	0
32.8	0.0164075	-4.69229e-05	-0.00175984	0.00175034	-0.00946425	0.0238347	0.00626715	0.00174975	-0.0607288	0.0231364	0
33	0.0488606	0.0444549	0.0715017	-0.0237136	0.0127665	0.0125401	0.0328071	-0.0108157	0.012212	-0.0134316	0
33.2	0.00226131	0.0199265	0.0364917	-0.0134406	-0.00538492	0.028443	-0.024605	-0.00626339	0.0113931	-0.0354016	0
33.4	-0.025701	0.0333429	0.0381918	-0.00488268	-0.00207788	0.0115962	0.0491901	0.0251161	-0.0198565	0.0365433	0
33.6	-0.0114072	-0.0742304	-0.0473127	-0.0270688	-0.0116913	0.0115072	0.0308166	-0.0120809	0.0360399	0.026955	0
33.8	0.00951491	-0.0584228	-0.0285925	-0.033099	0.00123945	-0.00337474	-0.00525869	-0.0593377	-0.0183616	0.0322423	0
34	-0.00172492	0.00609273	0.00184516	-0.0174727	0.00584616	-0.0249779	0.0193347	-0.0267422	-0.0350632	0.0512972	0
34.2	-0.0259141	-0.0108372	-0.0485388	-0.0211424	-0.0172366	-0.00451292	0.0190056	0.00328596	0.0621934	0.0190205	0
34.4	-0.0192489	0.0343552	-0.0139836	-0.0220771	-0.00668186	0.0232946	-0.0178413	-0.0189056	0.0348016	0.00111418	0
34.6	-0.009979	0.00871816	-0.0192723	0.0215243	0.00845215	-0.00856913	-0.00482025	0.0599967	0.0301341	-0.0063367	0
34.8	-0.0207335	-0.0173661	0.00961433	-0.0210553	-0.0101487	-0.0284846	0.00685473	0.00749145	-0.00237176	0.00657305	0
35	0.00485559	0.00423749	-0.0132437	0.0130794	0.0121512	-0.0121264	-0.0337694	0.0133652	-0.00848456	0.0151449	0
35.2	0.0417777	0.0201728	-0.01769	0.0220599	0.00789646	0.0101359	-0.0379624	0.0803984	-0.00422979	0.0110879	0
35.4	0.0386072	0.0130089	0.02062	-0.0111031	-0.000830609	0.0167566	0.000625567	0.0406154	0.00493371	-0.00362801	0
35.6	0.0144624	0.00323197	0.0126258	0.0117853	0.0323129	0.0236605	-0.0144644	-0.0354178	0.0204569	-0.0243092	0
35.8	0.0174592	-0.0127816	-0.0105304	0.00408266	0.0168746	0.0233798	-0.0401439	0.0211066	-0.00782188	-0.0109329	0
36	0.0305686	0.011537	0.0348546	-0.0054553	0.021527	-0.032847	0.0517679	0.0158254	-0.0216894	0.0563014	0
36.2	0.00775437	0.0680506	0.0317124	0.0148419	0.019288	-0.00414889	0.0385194	-0.030259	0.0143565	-0.00949764	0
36.4	-0.0184017	-0.00549416	0.000195469	-0.00947615	-0.00937428	0.00252649	-0.0456613	-0.0796434	-0.0421631	-0.0284736	0
36.6	-0.027455	-0.069077	0.0236362	-0.00144998	-0.000915734	-0.0220078	-0.0146158	-0.0516052	-0.0612594	0.00830203	0
36.8	-0.0318739	0.00175372	0.0421368	0.0334251	0.0136889	-0.0233387	0.0438283	-0.0189664	0.00651871	-0.0194016	0
37	-0.0229091	0.0422231	-0.0188515	-0.00838268	-0.0300923	-0.0178558	-0.00874006	-0.0617109	0.0285058	-0.0519435	0
37.2	0.000887295	-0.0190947	-0.0427604	-0.0293365	-0.0393024	-0.00489275	-0.000748938	-0.0187257	0.0532867	-0.0129918	0
37.4	-0.0315108	-0.0173888	-0.00445239	-0.0161456	-0.0271265	-0.0310096	-0.0136858	0.0164894	-0.0308194	-0.0192416	0
37.6	-0.00593516	0.00052644	-0.0289702	-0.025225	-0.00932848	-0.0137319	-0.0235137	0.0767767	-0.0365411	-0.025276	0
37.8	0.028737	0.0142429	-0.0254286	-0.0199046	-0.0158461	0.00514422	0.00690504	0.0323813	0.0131847	-0.0259967	0
38	0.0195436	0.0185478	0.00541229	0.00362237	-0.0061671	-0.000671138	0.030469	-0.0335922	0.0141887	-0.00581807	0
38.2	-0.000376632	-0.0106933	-0.0020425	0.0136726	0.027832	0.0106196	0.0148421	0.00369098	0.0158575	0.0277126	0
38.4	-0.0146314	-0.0496696	0.000996882	0.0156136	0.0261723	0.0234833	0.00333095	0.0127065	0.044079	0.0181857	0
38.6	-0.0224672	-0.0310371	0.00712248	0.0108838	0.0248338	-0.00320785	0.00730384	-0.0330681	-0.0351281	-0.00301118	0
38.8	-0.00468166	0.0269679	0.0297848	0.030214	0.0158356	0.0259588	0.00316954	-0.00684624	-0.0283749	-0.0118402	0
39	0.023348	0.0220281	0.0402292	0.0190665	0.0224262	-0.000504399	-0.0175541	0.00920328	0.0199355	-0.0014781	0
39.2	0.0247896	-0.0132311	0.0211205	0.0399834	0.0101952	-0.017099	-0.0181395	0.0129119	0.0231404	0.0114293	0
39.4	0.010662	0.000926146	0.00892629	0.0338836	-0.0208163	0.015656	-0.0232803	0.0277106	-0.00796094	0.0120176	0
39.6	0.00215353	0.0442048	0.0128015	-0.0267256	-0.0155679	0.0189071	-0.0191059	0.0217116	-0.00361446	0.0139217	0
39.8	-0.0135127	0.0400079	-0.0101609	0.0170097	0.00622995	0.0101681	0.0588167	0.00648749	0.0328079	0.0331689	0
40	-0.00704124	-0.0125753	-0.0138725	0.00288454	-0.0360273	0.0138007	0.0379484	0.0110901	-0.031629	0.0292239	0
40.2	-0.00918246	-0.0267968	0.0130347	0.0354218	-0.0572567	0.0342023	0.00886232	0.0016345	-0.0269916	-0.0349389	0
40.4	0.0132777	0.0234323	-0.00201107	-0.0210827	-0.0170852	0.0226158	0.0399932	-0.0130065	0.0104288	-0.0350715	0
40.6	0.0204246	0.00718388	-0.0374004	-0.0253922	0.0112141	-0.00366044	0.0403539	0.0210368	-0.000279439	0.00464682	0
40.8	0.0085429	-0.0452049	-0.0526241	0.0503318	0.00331741	-0.003876	-0.00340614	0.024415	-0.012655	0.0189297	0
41	0.0198013	-0.00433748	-0.0411262	-0.0114793	0.00756389	-0.00164505	-0.0169423	-0.0412653	-0.00235942	0.0127028	0
41.2	-0.0059264	0.0129951	0.0151135	-0.0569025	0.00532281	-0.0195093	-0.0419368	0.00070429	-0.0320922	-0.0503792	0
41.4	-0.00859969	0.0517031	-0.0154659	-0.0373127	-0.00154027	-0.00526244	-0.0173845	-0.037726	0.020473	-0.0364821	0
41.6	-0.00231494	-0.0256454	0.000362135	-0.00272051	0.010761	-0.0256433	-0.00195211	-0.0537314	0.0683855	0.0424426	0
41.8	-0.0134743	-0.0199166	0.045093	-0.0122619	0.0195734	0.00350084	-0.0012126	0.0151411	-0.0108409	0.0568957	0
42	0.00344566	0.0286905	0.0248009	-0.019207	0.00676125	0.0230712	-0.0314845	0.0594348	-0.0476227	0.022319	0
42.2	0.023514	-0.00818038	-0.0121164	0.0116531	-5.8219e-05	-0.0243165	-0.0388414	0.0259377	0.0161325	0.0208527	0
42.4	-0.021831	0.0119264	0.00637592	0.0133958	0.0143101	-0.0148057	0.0314528	0.00111692	-0.000464701	0.0255255	0
42.6	-0.0045327	-0.0102937	-0.011032	-0.0150445	0.00718087	-0.0128215	-0.00682425	-0.00704802	0.0585374	0.010205	0
42.8	0.0195336	-0.0421988	0.00138629	-0.0267037	0.000884149	-0.00107337	-0.000797868	-0.0231136	0.0229692	-0.0412532	0
43	0.00475611	-0.00544554	0.0383796	-0.0113267	0.0111897	0.00382388	-0.00430987	0.00773713	-0.0161039	-0.043812	0
43.2	0.00318961	-0.00201858	0.0147057	-0.00105972	0.00790084	0.00361839	-0.00874497	-0.0207748	-0.0391145	-0.00428957	0
43.4	0.0160733	-0.0369016	-0.0340167	0.0238528	-0.00136716	-0.00064268	0.0124461	-0.0237484	-0.0464814	-0.0025902	0
43.6	-0.0128182	0.0081576	-0.0398043	0.0378376	0.0122715	-0.0240239	0.00566285	0.0660964	0.000182197	-0.0330816	0
43.8	-0.0529602	0.0590631	-0.0341013	-0.023016	0.0190443	-0.0468241	-0.0164214	-0.0132732	0.0208115	-0.0329251	0
44	-0.0386401	-0.00653547	0.0581297	0.0295247	0.00910401	-0.0285847	0.00546286	-0.0639778	-0.0248825	-0.051003	0
44.2	-0.00355582	-0.0136248	0.015352	0.00616487	0.00603015	-0.012462	-0.0549004	-0.0379021	-0.0336782	4.15308e-05	0
44.4	-0.00776077	0.0144958	-0.000554499	-0.00822444	-0.0151398	0.00259168	-0.0511877	-0.0313238	-0.00145784	0.0170135	0
44.6	-0.0288466	0.0155316	0.0301937	-5.5692e-05	-0.023699	0.0160454	0.0159942	-2.63554e-05	-0.0187384	0.00191208	0
44.8	-0.0134628	0.0181656	-0.0055661	-0.0221093	-0.00354479	0.00766721	0.04491	0.0436538	-0.0188534	0.0169282	0
45	0.0104946	0.0134675	-0.0292133	-0.0282475	0.00143633	-0.00323691	0.0631836	0.0110569	0.0709834	0.00972051	0
45.2	-0.0218476	-0.0465846	0.0138633	-0.0310744	-0.00470787	0.0187573	0.0548916	0.0240585	0.051127	-0.0101107	0
45.4	-0.0377435	-0.0346333	0.0213328	0.0417127	-0.0341682	0.00346738	0.017151	0.0174161	0.0316866	0.0541706	0
45.6	-0.0120149	-0.00528295	0.0226565	0.0390655	-0.0298881	0.0063298	0.0283633	0.0118965	0.00964806	0.0479011	0
45.8	0.017335	0.00660598	-0.0149752	-0.0020228	-0.00673986	-0.00853512	0.00779237	0.0420042	0.0023082	-0.00704036	0
46	0.0307039	-0.0157894	-0.0619084	-0.012564	0.000163947	0.0259334	-0.0291266	0.0686238	-0.012848	-0.0212141	0
46.2	0.0463394	-0.0432909	-0.0292169	0.00215686	0.00146049	0.0945997	0.00329628	0.0471386	-0.0259885	-0.0114414	0
46.4	0.0596329	-0.00716033	0.0339271	0.0341334	0.00682548	0.0171134	0.0312204	-0.00108826	0.0238029	-0.00756883	0
46.6	0.0343858	0.0249741	0.0136319	0.00445855	0.000546226	-0.0233913	0.000856255	-0.0397375	0.019594	0.0146516	0
46.8	0.0259462	0.0460268	0.0159945	-0.0102595	0.0249707	0.0140217	-0.0222216	-0.0282047	0.00991789	0.0335621	0
47	0.0129629	0.0100238	-0.00100824	0.00641986	0.0101573	0.0073174	-0.0271389	-0.0210099	-0.0655655	-0.0360882	0
47.2	0.010987	0.0112158	0.00124944	0.0305746	0.000906235	-0.0279932	-0.0442529	-0.0328096	-0.0335439	-0.0168759	0
47.4	0.000790553	0.031033	0.00375444	0.00765295	0.0245243	-0.015575	-0.0419352	-0.0394917	0.0182861	0.0364555	0
47.6	-0.0306006	-0.00959287	-0.0404184	-0.0415345	0.0170826	-0.00883531	-0.0176388	-0.0428338	-0.0653063	-0.0389493	0
47.8	-0.00501849	0.00151813	-0.00348102	-0.000960206	-0.00436744	-0.0585747	-0.040178	-0.0337934	0.0139152	0.00060441	0
48	-0.00934634	-0.0356769	0.039521	0.0238377	-0.0136195	-0.00829971	-0.00392024	0.0260674	0.00259786	0.0254841	0
48.2	-0.015931	-0.0275982	0.00303184	-0.0286858	-0.00540487	-0.00993722	-0.06648	0.0061118	-0.0101199	0.00722866	0
48.4	-0.0104248	0.0278676	-0.0210558	-0.0187984	-0.0109641	-0.0178694	-0.0486657	-0.0242925	0.0147105	-0.0124436	0
48.6	-0.00541425	0.0342421	0.023336	-0.00306961	-0.0177888	-0.00662514	0.0219552	-0.0104003	0.0128928	-0.0225228	0
48.8	-0.00334535	-0.0202981	0.0273502	-0.0320774	-0.00971752	-0.0162307	0.000561204	-0.00389824	0.0102479	0.00591038	0
49	0.00295643	-0.0224739	-0.0425672	0.00686161	-0.00456585	-0.0117304	-0.0011845	-0.0189955	0.0345019	0.0494276	0
49.2	0.00572627	0.0582113	-0.0093619	0.0142334	0.0075926	0.00212629	0.0418084	-0.0222989	-0.0250765	-0.0268979	0
49.4	-0.0248924	0.0253673	0.00355914	-0.000186688	0.00826246	-0.00748102	-0.000777454	-0.0126191	-0.0142575	-0.0408996	0
49.6	-0.0178566	0.0177842	0.0502367	0.0202988	0.00445262	0.00703131	-0.0267247	0.0180571	0.0159248	-0.0165813	0
49.8	0.00914632	-0.00765033	0.0310388	0.0108447	-0.00206397	0.02364	0.00791634	0.0271975	0.0485185	0.0178787	0
50	0.0261088	-0.0308147	-0.0207588	-0.0273583	0.0212203	0.0160408	0.0432035	-0.00144052	0.0275278	0.00305704	0
50.2	0.00999362	0.0139073	0.00211133	-0.021784	0.037864	0.00948813	0.0544658	-0.0152266	-0.0347756	-0.0374469	0
50.4	-0.0403643	-0.0141128	0.0020727	-0.0139288	-0.0219231	0.0125574	0.0532563	0.029122	-0.00212829	0.023275	0
50.6	0.0160968	-0.0644525	0.0146341	-0.0443249	-0.00446163	0.0138617	0.01358	0.0847006	-0.00388339	0.0302416	0
50.8	0.00154165	-0.0640042	-0.0190055	0.0208632	-0.000435988	0.0482351	0.018507	0.0438021	0.0256465	0.0167245	0
51	-0.0393204	-0.0393791	-0.0304929	0.0299824	-0.012624	0.0488552	0.00131565	0.0253559	0.00536761	0.00964722	0
51.2	-0.0295296	0.0298456	-0.00732198	-0.0013782	-0.00847712	0.018372	0.0068425	0.0444829	-0.0188616	-0.0115418	0
51.4	0.0109542	0.0865204	0.0104069	0.0162067	0.0111873	0.0332693	0.0433678	0.00807146	0.0177219	-0.0149561	0
51.6	0.028573	0.0362068	0.00172141	0.0308408	0.0126934	0.0707928	0.0263436	-0.0183655	0.034307	0.0100677	0
51.8	0.00253933	-0.0205081	-0.0434965	0.0342109	-0.0337194	0.0283526	0.00964419	0.0613326	-0.0059886	-0.020533	0
52	0.0160137	-0.0217267	-0.0296913	0.0253635	-0.0413736	-0.00898098	-0.0241272	-0.0190967	-0.0395222	-0.0289763	0
52.2	-0.00076778	0.0286967	0.00882296	-0.0185918	0.00197893	-0.0161473	-0.0422433	-0.034465	-0.0101948	-0.0351515	0
52.4	-0.000448833	0.00905196	0.0471349	0.0119593	0.0276012	-0.0249825	-0.00544959	-0.02416	0.0391927	0.0173722	0
52.6	0.0134859	-0.0102011	0.0228347	0.0110527	-0.000878686	-0.0385735	0.00882055	-0.0399569	0.00830738	0.0323691	0
52.8	0.00211455	-0.00816364	-0.024563	-0.0568909	-0.0154286	-0.0429981	-0.0309507	-0.0187358	-0.0497099	-0.0353243	0
53	0.00531994	-0.0661274	0.00785318	-0.00644591	0.0204598	-0.0373848	-0.033822	-0.00953298	-0.0128632	-0.0166158	0
53.2	0.00686556	0.0317572	-0.0133626	0.00900537	-0.00708832	-0.0184099	-0.0221292	-0.050103	0.00394176	0.0412699	0
53.4	0.00422637	-0.00813628	-0.0287096	-0.00893308	-0.012069	-0.032096	-0.0144968	-0.0264456	0.0484746	0.00328584	0
53.6	0.00194052	-0.0264403	-0.00633116	0.0247543	0.00480163	-0.0238098	-0.00955244	0.0164145	0.0564931	0.016807	0
53.8	0.0248067	0.0172808	0.00870488	0.0338817	0.0145197	0.0191395	0.030653	-0.00236133	-0.00327192	0.0428989	0
54	0.0410937	0.0525223	-0.00593872	-0.00914852	0.00673766	-0.00502319	0.0408726	-0.018765	-0.064205	0.00731457	0
54.2	0.00468012	0.044829	-0.00708355	-0.0270777	-0.0027626	-0.0661976	-0.0101544	0.0184631	-0.0667358	-0.00476064	0
54.4	-0.0303738	-0.0233941	0.0198796	-0.0245955	0.00507454	0.00347172	0.00354646	0.0181109	-0.0407455	0.0294064	0
54.6	-0.00985572	0.0249393	0.000641617	-0.0132412	-0.0068046	0.0215838	0.0145182	0.0120641	-0.0344896	-0.00597903	0
54.8	-0.0401191	-0.0127856	0.00174399	-0.000782159	0.00935661	-0.0288744	-0.0205454	-0.035284	0.0127003	-0.0348528	0
55	-0.0214291	-0.0201048	-0.0180158	-0.0135463	-0.00109902	-0.0371433	-0.0491935	-0.0418829	0.019793	-0.0127526	0
55.2	0.014813	0.00511895	-0.0291647	-0.0316502	-0.00188109	-0.00754364	-0.0366706	-0.011075	-0.0196708	0.01106	0
55.4	0.00191028	0.00038577	-0.00227054	-0.0277119	0.0120081	0.00573743	-0.029693	-0.0226021	-0.0237429	0.000426422	0
55.6	-0.00895681	0.0173117	0.0209267	-0.0086648	-0.0148064	0.0024673	-0.0439074	-0.0310826	0.00295219	-0.0116216	0
55.8	-0.0238384	-0.00251286	0.0472212	0.0127474	0.00398714	-0.0131054	-0.00201984	0.04989	0.00321073	-0.00475361	0
56	0.0325159	-0.00230336	-0.000317254	-0.00459464	0.0153992	0.0191196	0.0250575	0.0322818	0.039002	-0.0213645	0
56.2	0.0350677	0.0218669	0.0023026	-0.0255801	0.0174694	0.0252959	-0.0129636	-0.00320708	0.048271	0.0284555	0
56.4	0.0126473	0.0145549	0.00309529	0.0431168	-0.0132215	0.0327902	0.0431106	0.0165954	0.0213317	0.0350324	0
56.6	-0.0216661	-0.0294668	-0.0138309	0.069431	-0.0282605	0.0274482	0.0993734	0.0257908	0.0132051	-0.0185003	0
56.8	-0.0422009	-0.0555261	-0.0015211	0.00469936	0.000643356	-0.000356831	0.0305145	0.0175875	0.0303965	-0.0339924	0
57	0.023707	-0.0457529	-0.00791748	0.0302331	0.00492502	0.0415441	0.0101851	0.0571623	0.0122783	-0.0177028	0
57.2	0.0206153	-0.029633	-0.0153484	0.00923134	0.0105385	0.10685	0.0258334	0.0420291	-0.0382794	0.0309064	0
57.4	0.0478038	0.0465204	0.00340477	0.00363856	0.00515075	0.0960674	0.0690486	0.0165975	0.00186265	0.0391003	0
57.6	0.0650753	0.0343585	0.054653	0.020442	0.00959132	0.0596465	0.0788349	0.00775792	-0.0213941	0.0387137	0
57.8	0.0489154	-0.0174926	0.0336893	-0.00990871	0.0298793	0.0363309	0.045624	-0.00346206	-0.00944722	0.0273252	0
58	0.0390218	-0.021196	-0.0314252	-0.0484548	0.0218838	0.0484864	0.00137452	-0.0235514	0.0501095	0.00151793	0
58.2	0.053074	0.0181191	-0.0177414	-0.0152901	-0.00889744	0.0610526	-0.0177859	-0.0307249	0.0176514	0.0109746	0
58.4	0.0587858	0.0905851	0.00112701	0.0148671	0.0123922	-0.000424449	0.0037403	-0.00822447	0.011315	0.0488665	0
58.6	0.0120399	0.0197906	-0.0408357	-0.0210448	0.0281794	0.0212282	-0.0139034	0.0262588	0.00892739	0.0227087	0
58.8	0.0373485	0.0601463	-0.00821008	-0.0474739	0.0472563	0.0477379	-0.0684083	-0.00413409	-0.00280823	0.0302096	0
59	0.0215507	0.0484549	0.0516881	-0.0459403	0.0418386	0.0459045	-0.0134745	-0.0237412	0.00303637	0.0415631	0
59.2	0.0152992	-0.0091522	0.038302	-0.0107531	0.0199615	0.020798	0.0486874	-0.00189843	0.0414545	0.0480786	0
59.4	0.0561525	0.0407375	-0.0167545	0.0090676	0.00927501	-0.000749242	-0.00257793	0.0139268	0.0476027	0.0351478	0
59.6	0.0205308	0.0844523	-0.0153174	-0.00994497	0.0175156	0.011147	-0.0344535	0.0186326	-0.000839562	-0.0119061	0
59.8	0.0245242	0.0424441	0.0359937	0.0471199	0.0514404	0.0152187	0.0117657	0.0323763	-0.000964977	0.0182283	0
60	0.0674811	0.062707	0.0344475	0.0272339	0.0321366	0.0282094	0.0452611	0.0528878	-0.0683508	-0.00830919	1
60.2	0.118596	0.0443365	0.0768442	0.0300308	0.0574776	0.0749497	0.0360633	0.0619103	0.0509702	0.0177777	1
60.4	0.151212	0.0554679	0.0813781	0.0202452	0.0701192	0.105607	0.0685867	0.0549741	0.11097	0.0173395	1
60.6	0.152548	0.0931118	0.0854344	-0.00658666	0.051272	0.116753	0.107714	0.0550941	0.0288137	-0.00188781	1
60.8	0.148806	0.0907594	0.129043	0.0285275	0.0400007	0.120271	0.0908352	0.0823899	0.0409879	0.0252065	1
61	0.157726	0.116496	0.0742364	0.0726799	0.00515069	0.0864042	0.0829759	0.0771543	0.0679294	0.00277521	1
61.2	0.117427	0.09567	0.0954155	0.0502776	0.0264767	0.0797822	0.0477896	-0.0382953	-0.00950632	0.0223344	1
61.4	0.0860491	0.091129	0.0754651	-0.00558207	0.00769566	0.0645181	0.0257056	-0.0116348	0.000254224	0.0370155	1
61.6	0.0882279	0.0667625	0.0450612	0.0241116	-0.00811484	0.0349087	0.0508514	-0.0130782	-0.0166076	0.0499604	1
61.8	0.0608136	0.0244914	0.0403257	0.0431511	0.0236648	0.0409194	0.0794974	0.0108502	0.00347897	0.0237434	1
62	0.0322419	0.0203484	0.0482813	0.00358342	0.0330807	0.0775649	0.0872989	0.107554	0.0598677	-0.0172879	1
62.2	0.0487095	0.0359116	0.0592738	0.00915267	-0.00658812	0.0975049	0.0711153	0.105581	0.0197954	0.0365109	1
62.4	0.0256421	0.0271162	0.0636751	0.0187234	-0.00174889	0.101069	0.0295809	0.0804362	0.0261063	0.119003	1
62.6	0.0559586	0.0929793	0.0935723	-0.00458507	-0.00693	0.0704132	0.110871	0.150454	0.0616419	-0.000246874	1
62.8	0.0381552	0.0729097	0.0503566	0.0172314	0.00307064	0.117281	0.113699	0.112449	0.0764242	-0.0168604	1
63	0.0275724	0.018848	0.0251657	0.00463388	-0.0106924	0.128615	0.0427017	0.0645457	0.0331343	0.0497822	0
63.2	0.0367238	0.00943601	0.0210383	-0.0230269	-0.0281591	0.0960329	0.0451082	0.048224	0.0118612	0.0331091	0
63.4	0.0480118	0.0289991	-0.00556174	-0.00557746	-0.0118196	0.101903	0.106146	0.0217203	0.0251526	-0.0118552	0
63.6	0.0707146	0.0574344	0.0153045	0.010602	-0.00715955	0.103149	0.0879844	0.0432177	-0.00405062	0.0153664	0
63.8	0.00869292	0.0505064	0.0398474	0.0452846	-0.0238437	0.0852971	0.014521	0.0529802	0.0234242	0.00566436	0
64	0.0488219	0.0179335	-0.0114791	0.0334854	-0.0218151	0.0542337	0.0257862	0.0604112	0.0411351	-0.0195057	0
64.2	0.0644787	-0.0120143	0.0063928	0.0136834	-0.00346964	0.0351835	0.0322905	0.0255126	0.00086152	0.0503311	0
64.4	0.0304894	0.0202351	0.00466333	0.00654303	0.0187867	-0.001178	0.0109142	0.0401376	0.00434439	0.0256534	0
64.6	0.0089869	0.0675064	-0.0166517	0.0007139	0.0117659	-0.00678929	0.00634005	0.0734328	0.019695	-0.0548505	0
64.8	-0.0063326	0.056873	0.021394	0.00214404	-0.0162086	0.0285283	0.0187633	0.049095	-0.0300944	-0.00742676	0
65	-0.0104949	0.028843	-0.0151372	0.0064891	-0.00305325	0.00167065	0.0333659	0.0691058	-0.0151274	-0.00129672	0
65.2	0.018568	-0.0161131	-0.053106	-0.0218288	0.00142788	0.0191683	0.0439454	0.060498	0.0523148	-0.0547079	0
65.4	-0.0108827	0.00572602	-0.0165662	-0.0221585	-0.0261865	-0.00967977	0.0271405	-0.0260233	-0.0396327	-0.0364151	0
65.6	-0.00837245	-0.028994	-0.00473012	-0.0495973	-0.0160304	-0.00231793	0.00558243	-0.0307332	-0.0468449	-0.00099949	0
65.8	-0.000388818	-0.0383059	-0.0203102	-0.041845	-0.0019311	-1.99385e-06	-0.0324086	0.00521702	0.0587167	0.0296627	0
66	-0.0404974	0.00269338	-0.0144745	0.0112756	-0.0154444	-0.0236381	-0.0285032	0.0150874	0.062089	0.0268757	0
66.2	-0.0483948	-0.0217127	-0.0119122	-0.0023587	-0.0088132	0.00643012	0.0273171	0.0168673	-0.0120465	-0.0318053	0
66.4	-0.0107455	0.00971964	-0.0108758	-0.0208998	0.00251477	0.000359038	-0.0394302	-0.0696157	0.00558527	-0.00980399	0
66.6	-0.0179402	-0.00709515	0.00626163	0.0266327	0.0142471	-0.0250262	-0.0554238	-0.0397754	-0.0241075	0.0374621	0
66.8	-0.0308665	-0.0533936	0.0138319	0.0183839	-0.00925804	-0.0181085	0.0129886	-0.0461901	-0.0655539	0.00226939	0
67	-0.0164526	-0.0276025	-0.0260496	-0.0066476	-0.00963644	-0.0376466	0.0229942	0.00835537	-0.051429	-0.033275	0
67.2	-0.00445264	0.0145277	-0.0165862	-0.0202559	-0.0109996	-0.0521028	-0.0347535	0.0650184	-0.0219811	-0.00875748	0
67.4	-0.0110046	0.026701	0.0289323	-0.00753769	-0.024436	-0.028597	-0.0363725	0.0142557	-0.0174019	0.0197812	0
67.6	-0.0088481	0.0601449	-0.0328388	0.0421727	0.0205446	-0.0250153	0.0206859	0.00677658	0.0105482	0.00948904	0
67.8	0.00245273	0.00715157	-0.0375844	-0.0312954	0.0247682	0.0226708	0.0189403	-0.0111819	0.0492067	-0.0221682	0
68	0.0161823	0.00386922	-0.00521165	-0.00838656	0.0147401	0.014972	0.0119376	-0.0806076	-0.0335481	-0.0270149	0
68.2	0.0038957	0.0063666	0.0457028	-0.010619	0.0234816	-0.0171065	0.0132731	-0.0418547	-0.0521057	-0.015735	0
68.4	-0.00983953	0.0137818	0.0485552	0.00169725	0.000823981	-0.00201629	-0.00358762	0.0162906	-0.00369044	-0.00738168	0
68.6	0.00308137	0.0414893	0.0127035	0.0273545	-0.0208947	-0.00494232	-0.0115935	-0.0017144	0.0263621	0.00412683	0
68.8	0.00341244	0.0214689	0.0134515	-0.0135859	0.0133189	-0.050705	0.014905	-0.0395812	0.0350833	0.0179776	0
69	-0.0276738	-0.0364933	0.0350013	0.00598066	0.0158392	-0.0116531	0.020412	-0.0645537	0.00490092	0.00769225	0
69.2	0.0149803	0.0204334	0.0471577	0.0106663	-0.0122508	0.00805203	-0.00736628	0.0297017	0.00393277	-0.0288684	0
69.4	0.0250685	0.00508266	-0.00281956	-0.0345938	-0.000452167	0.00341221	-0.0343523	0.0358814	-0.0158088	-0.0600837	0
69.6	-0.00576202	-0.0258464	-0.00990985	-0.000109606	-0.00331223	0.0227431	-0.0117606	0.014641	0.00606393	0.00326233	0
69.8	0.00686382	-0.0326828	0.00394622	0.0536716	-0.0206916	0.0227967	-0.022095	0.027569	0.0321194	0.0456088	0
70	0.029157	-0.0269834	-0.0269203	0.0459949	-0.00782179	0.0183873	-0.0498318	0.0115829	0.00379916	-0.0120102	0
70.2	0.00211879	0.0168455	-0.0311273	0.0355653	0.0126771	0.0622789	0.0114194	-0.0165252	-0.0175953	-0.0217766	0
70.4	0.0283159	0.0144146	0.0163537	-0.0103389	0.0133344	0.0469476	0.0339457	0.0266455	-0.00378953	0.0346224	0
70.6	0.00776272	-0.0270933	0.0136742	-0.014525	0.0060373	0.0480036	0.0276866	0.0406083	0.0122444	-0.0143903	0
70.8	0.0125189	0.0137388	0.00412616	-0.00234445	-0.000503218	0.0591762	0.0524836	0.0248839	-0.0145418	0.00136675	0
71	0.0149741	0.0337356	0.021528	-0.00195339	0.00937871	0.0171817	0.0375664	0.0309278	-0.0170091	0.0482029	0
71.2	0.00292923	-0.00282605	0.0226219	0.00161128	-0.00247434	-0.0399374	0.0288125	0.0269334	0.0379187	0.00458883	0
71.4	0.00889332	-0.0171274	-0.00728855	0.0343287	-0.02964	-0.018352	0.0566866	0.00926411	0.0461161	-0.0208968	0
71.6	-0.00472295	-0.0293151	-0.0168155	0.042905	-0.0102659	0.0379498	0.00360443	0.029638	-0.0176773	0.0624764	0
71.8	-0.0260646	-0.0308155	-0.0182242	-0.0692609	-0.0269463	-0.00792187	-0.0178206	0.00249125	0.0401133	0.000310684	0
72	0.000824966	-0.00536368	-0.0562172	-0.0363672	-0.0209098	-0.0142934	-0.0256174	0.0553684	0.0329829	-0.0367102	0
72.2	-0.00367938	0.0360072	-0.0112391	-0.0205713	-0.0153594	-0.0292323	-0.00254337	0.0734863	-0.0098576	-0.0418565	0
72.4	-0.0383257	0.0235406	0.00518198	-0.0544284	-0.0154743	-0.0284844	-0.029002	-0.0254604	-0.0135122	-0.0234403	0
72.6	-0.0104292	-0.0125695	-0.0254024	-0.000235728	-0.00879322	-0.00507871	-0.0639656	-0.093361	-0.0231133	0.0122185	0
72.8	0.0380373	0.00630169	0.0117491	0.0615398	0.0025921	-0.0296272	-0.0216508	-0.048	-0.0418102	0.00924809	0
73	-0.0164243	0.0163116	-0.00517506	-0.0267306	0.0172204	-0.0424232	-0.0303687	-0.0322723	0.0011577	-0.0114936	0
73.2	0.00133481	-0.00357478	-0.0197601	-0.0282749	-0.00724711	0.0103822	-0.0211434	0.0285236	-0.0202054	0.0271577	0
73.4	0.00883864	0.00510585	-0.00378306	0.0364887	0.0246524	0.0433233	-0.0131245	0.0141417	0.0489422	0.0239684	0
73.6	0.020862	0.0428239	0.00490104	0.0275179	0.0565928	-0.00527346	-0.00588186	-0.0428822	0.0122106	0.0119247	0
73.8	0.00725524	0.00306899	0.00814498	-0.0395671	0.0256953	-0.0318976	-0.026393	-0.0334422	-0.0601201	0.0120716	0
74	-0.0317019	-0.0642444	0.0118286	-0.0406833	-0.00765111	0.0143007	-0.0322133	-0.0032949	0.02093	0.0224279	0
74.2	-0.0130167	-0.01999	-0.00375997	0.0176106	0.00754326	0.0220925	0.0272921	-0.017855	0.0776438	0.0232901	0
74.4	-0.0100165	-0.0144064	-0.00596763	-0.000749908	0.0100774	-0.0117269	0.0102977	0.0181147	0.000622409	-0.0619278	0
74.6	0.0116347	-0.0222004	-0.0041719	-0.013127	0.0169572	0.00448335	0.00521492	-0.0617529	-0.00892027	0.0297688	0
74.8	0.0120433	0.011855	-0.0192184	0.010881	0.00398175	0.0113224	0.0156741	0.0154625	-0.00303904	0.011964	0
75	-0.0196775	0.0388206	0.00538416	0.0390842	-0.01583	-0.00077762	0.00498533	0.0556995	-0.0363234	-0.0302358	0
75.2	-0.0227562	0.0267046	0.0467871	0.0371722	-0.00623509	-0.0148431	0.0122391	-0.0166446	-0.0384096	-0.00475737	0
75.4	-0.00163618	-0.00900972	0.018635	0.00711485	0.0156614	-0.0254275	0.0188661	-0.00952395	-0.0160659	-0.024313	0
75.6	-0.0186481	-0.0409582	-0.038339	-0.0141639	0.00671241	-0.0124447	-0.0452623	-0.00769434	-0.0588527	-0.0244742	0
75.8	0.00985867	0.0121667	-0.0251861	-0.0106713	-0.00168937	-0.00555959	-0.0202322	-0.00938659	-0.0455133	-0.00247463	0
76	0.0033954	0.0219183	-0.0164208	-0.0196397	-0.00420711	0.00190247	-0.0190102	-0.0336473	-0.0216313	-0.0174192	0
76.2	0.0187241	0.00503339	0.0377285	0.0304903	0.0098004	-0.0253745	-0.0191402	0.01093	-0.0125739	-0.00628361	0
76.4	0.0123996	-0.0375183	0.0668477	0.0286289	-0.0111536	-0.0430167	0.0125877	0.00648623	0.0152055	-0.00427608	0
76.6	-0.0247307	-0.0688629	-0.00252139	-0.0508569	-0.0142059	0.00387081	0.0469336	-0.056629	0.0307164	-0.0188211	0
76.8	-0.00899476	-0.0203891	-0.0503105	-0.0434277	0.0350805	0.0483456	0.0539314	-0.0190157	0.00431418	0.0198481	0
77	-0.00512308	0.0367887	0.0034718	0.00762045	-0.0241218	0.00624353	0.0217227	0.016239	0.0271772	0.0380539	0
77.2	-0.028582	0.0698943	-0.0161012	-0.0164352	-0.0186401	-0.0157237	-0.00935624	-0.000264185	0.0525298	-0.0109498	0
77.4	-0.0111868	-0.0281798	-0.004607	0.011711	-0.00710135	0.00286945	-0.00583632	-0.0620693	-0.0145771	-0.00168206	0
77.6	0.0148769	-0.0209434	0.0322098	0.028851	-0.00723357	-0.0285358	-0.0174569	-0.0210074	0.00866476	-0.00605709	0
77.8	0.00805743	0.0225396	0.047069	0.00984415	0.00792922	-0.0350903	-0.0103384	0.0331389	0.0572107	-0.0160772	0
78	-0.0173122	-0.044396	0.00957836	-0.00183481	0.00765383	0.010734	0.020779	0.0149609	-0.00166339	0.0178726	0
78.2	-0.0229839	-0.0391584	-0.0504088	-0.0144153	-0.0242611	-0.02874	-0.0060451	0.0335408	-0.0249674	0.00915622	0
78.4	0.0114287	-0.0102688	0.0246612	0.0309759	-0.0151675	-0.0466955	-0.0290441	-0.0187284	-0.0217186	-0.0178221	0
78.6	-0.0151065	0.0510243	0.0243168	0.0152462	-0.000309559	0.00824527	-0.0921299	0.0261634	0.00341906	0.00499958	0
78.8	-0.0170286	-0.000701787	0.0106959	-0.0125074	0.00172492	0.00404766	-0.0709173	0.077277	-0.0124576	0.0269547	0
79	0.00697259	-0.0187596	-0.0525333	-0.00451487	-0.000406733	-0.000276297	0.0533613	0.0404823	-0.00743018	0.0207952	0
79.2	0.0213296	0.0406247	-0.0633563	0.00283204	0.0139672	0.0314031	0.108864	0.00286198	0.0295726	0.022724	0
79.4	0.0116572	0.0105462	0.0406606	-0.0114944	0.0362783	0.0298446	0.0325658	-0.00321197	0.0243074	0.021201	0
79.6	-0.0364924	-0.0337695	0.00301061	-0.00573671	0.0238539	0.0426399	-0.0170042	-0.0462777	0.0100915	-0.016522	0
79.8	-0.00276436	0.0414332	-0.00321689	0.0239851	-0.00504177	0.0770816	-0.0221706	0.0370494	0.0244724	0.0132749	0
80	0.0302718	0.0221899	0.0267882	0.0175849	0.00107267	0.0287532	0.0533617	-0.00940233	-0.0140415	-0.00985651	0
80.2	0.0187276	-0.0300213	0.0263433	-0.00143212	0.00211064	0.0205781	0.0444952	-0.0313061	0.0205931	0.0262848	0
80.4	0.0156453	-0.0229336	-0.0207385	-0.00665401	-0.00158811	0.037526	0.00173042	0.028423	0.0399587	0.00679275	0
80.6	0.0229659	0.0110083	-0.0463652	-0.00137569	0.00192978	0.0330211	0.0291487	0.0599314	-0.0131794	-0.0516544	0
80.8	-0.00466135	0.0115001	-0.0186538	0.00824833	-0.0112799	0.0423731	0.0421976	0.0621228	-0.00669636	0.014536	0
81	-0.0163279	-0.0218524	-0.0130583	0.0111468	-0.0289293	-0.0165667	0.00957928	0.0330042	-0.0207362	-0.0430052	0
81.2	0.0101434	0.059858	0.0343631	0.0152221	-0.053432	-0.0200089	-0.0490453	-0.00870541	-0.0386093	0.0143354	0
81.4	0.0208893	0.0114519	0.0365249	0.0130897	-0.00452008	-0.00902556	0.000107686	-0.0267472	-0.039158	-0.00567469	0
81.6	0.0141311	-0.0247466	-0.00585784	-0.00665948	0.00949368	-0.0338662	0.00538736	-0.014273	0.00570698	-0.0416009	0
81.8	0.00497999	-0.0104635	-0.0359925	-0.0274399	-0.0178246	-0.03109	-0.015946	0.000424106	0.0401751	-0.00410018	0
82	-5.81012e-06	-0.0342355	-0.0426105	-0.0266591	-0.0128047	-0.00215839	-0.0181148	0.00280653	0.00370792	0.00635476	0
82.2	0.00477554	0.0217619	-0.0301536	-0.0194324	-0.0166911	-0.0371477	-0.0958228	-0.00338531	-0.0475203	-0.0176782	0
82.4	-0.00324833	0.0523019	0.00369128	-0.0294793	0.00976362	-0.0473865	0.00599299	-0.0411623	-0.044568	0.0278175	0
82.6	0.00208783	0.0173007	0.00509129	-0.0143439	0.0265716	-0.0507506	-0.0424494	-0.0700051	0.0181897	-0.0083088	0
82.8	-0.00405542	-0.0234918	0.0351486	-0.00823515	0.0176705	-0.0292098	-0.0350112	-0.0554267	0.0608294	0.0211816	0
83	-0.00753852	-0.0147468	0.00878348	-0.0179914	0.0205024	-0.0160593	-0.00897653	-0.0392752	0.0229702	0.0233593	0
83.2	-0.00754996	0.00575327	-0.0346693	-0.0266398	0.0272937	-0.0138226	-0.04233	-0.0422555	-0.0353743	-0.0210398	0
83.4	-0.0135899	0.00624067	0.0265973	-0.0164613	0.0133291	0.00818032	-0.023347	-0.0474721	-0.020745	0.0183808	0
83.6	-0.000167324	0.0197881	0.0466167	0.0247757	0.0119178	0.0102212	-0.00745899	-0.0532474	0.0254319	0.00536992	0
83.8	-0.0236156	-0.0302648	0.00508728	0.0209283	-0.00595862	-0.0026553	0.0452606	0.000984874	-0.00328481	-0.0349581	0
84	-0.00258941	-0.0111581	0.0306619	-0.0109322	-0.0103855	-0.0234854	0.0226892	0.0373677	-0.0321165	-0.0126048	0
84.2	0.016378	-0.00787786	0.0200683	0.0231168	-0.0113876	-0.0223867	-0.00133796	0.0126032	-0.00995431	-0.00405543	0
84.4	-0.00381294	-0.00959833	-0.0248441	0.0225227	-0.00818241	-0.0135805	-0.0145108	-0.00248801	0.0174355	0.00865613	0
84.6	-0.0276651	0.00294629	-0.0129808	0.000637472	0.010491	0.024065	-0.0186635	0.0357183	0.00326116	0.035111	0
84.8	-0.0317233	-0.032051	0.0179826	0.068303	0.0233746	0.0686011	0.0203536	0.0764788	-0.0131393	-0.00192615	0
85	-0.0167865	0.00123511	0.024339	0.00257938	0.00932023	-0.0274372	-0.00790577	0.0859492	0.0181024	-0.0144082	0
85.2	-0.00574831	-0.0145508	0.0046199	0.00693865	-0.0108396	-0.0127814	0.0170852	0.0408589	0.00653424	0.00040705	0
85.4	-0.0167647	0.0263132	-0.0104597	0.0292269	0.00563679	0.0104365	0.0112258	0.0280841	0.00341982	0.00494263	0
85.6	0.000815943	0.033006	-0.0144125	-0.0144233	-0.000778421	-0.00424616	0.0100593	-0.00236198	-0.0158243	0.0174657	0
85.8	0.0119376	-0.0113204	-0.021304	-0.0594119	-0.0434636	0.0153179	0.0137148	0.00775346	0.0235166	0.00584504	0
86	-0.00797918	-0.0025109	-0.0260386	-0.020782	-0.0431125	0.0477463	0.0311726	0.0684077	0.0733179	-0.0238577	0
86.2	0.0232684	-0.00638988	-0.0198949	0.0316104	0.00702566	0.0190671	0.112705	-0.0151642	-0.0467413	0.00136375	0
86.4	0.0318971	-0.05637	-0.0283483	-0.0274023	0.01043	0.00825616	0.0173339	-0.0875825	0.000506457	-0.0277024	0
86.6	0.0128481	-0.000639893	-0.00143827	-0.0136284	0.00551592	0.0412954	-0.00132428	-0.0172523	0.0189229	-0.0151664	0
86.8	0.00562724	0.0365269	-0.0246233	0.00794443	-0.00157198	0.0433565	-0.00596948	-0.0101699	-0.0112774	-0.0164282	0
87	0.0255493	0.00663487	-0.0270173	-0.0178717	-0.00235984	0.0123727	-0.0226353	-0.0248761	-0.00651954	-0.0187051	0
87.2	0.0301407	-0.00424383	0.004921	-0.0198919	-0.00450958	-0.00143895	0.00135887	0.0119153	-0.0042396	0.00108273	0
87.4	0.00733876	-0.00610518	0.000978338	0.0108003	-0.0113479	-0.00832437	0.0188418	0.0147793	-0.0336763	0.0159005	0
87.6	0.0177634	-0.0432772	0.0549975	-0.00696328	0.0130459	-0.0362598	0.00455183	0.0350296	-0.00809548	0.0515264	0
87.8	0.0167739	0.0390234	0.0448046	-0.0165689	0.0112351	-0.0205229	-0.000483762	0.0284119	-0.00804284	0.0241405	0
88	0.0293885	0.0621976	0.0262312	0.017177	0.0211058	-0.00975113	-0.042014	-0.0283229	-0.0230098	0.00537691	0
88.2	0.00295065	0.00691869	0.00661056	0.0403337	-0.00809256	-0.0108365	-0.0443134	-0.0239558	0.0137629	0.0244002	0
88.4	-0.0133751	0.0182349	0.00806148	0.0261538	-0.013809	-0.0338492	-0.0304754	-0.017392	-0.00190899	0.00911159	0
88.6	0.00587784	0.057188	0.0298033	0.00210836	0.0326485	-0.0555007	-0.0381146	-0.0501728	-0.0525704	-0.0240023	0
88.8	-0.0094667	0.00450079	0.00552266	-0.0102499	0.0112689	-0.0227209	-0.0180699	-0.0104492	0.0214355	0.00360745	0
89	0.0128178	0.0173642	-0.0201987	-0.00599725	-0.0202343	-0.00164856	-0.0282237	-0.000336844	0.0334236	-0.0101897	0
89.2	-0.0293774	-0.00733076	0.0227632	0.00518685	-0.000278046	-0.0148686	0.0368593	-0.0251793	0.0235835	-0.0455998	0
89.4	-0.0254758	-0.0575261	-0.00309594	0.0130928	0.00509422	0.00567002	0.0272954	0.0239643	0.00919842	-0.00804412	0
89.6	-0.0251466	-0.0618951	-0.0556006	0.00713751	-0.00932254	0.0145875	0.0114301	0.0118821	0.00382154	0.00583111	0
89.8	-0.0509659	-0.0187113	-0.0612514	-0.0077453	0.00165113	0.0226674	0.0122695	-0.0105466	0.00768803	-0.0350935	0
90	-0.0169215	0.0131816	-0.0389604	-0.0117584	0.0241226	0.054505	-0.000150545	0.0504002	0.00844307	-0.00388638	0
90.2	0.0241978	0.00119688	0.00408572	-0.000142595	0.01316	0.027234	0.0670498	0.00531244	0.0138735	0.0780794	0
90.4	-0.00443829	-0.0230629	-0.0037959	0.000141106	-0.00238	0.0283316	0.00901649	0.0325144	0.0101381	0.0285351	0
90.6	-0.017746	-0.0243227	-0.00383831	-0.0197566	-0.022043	0.00677628	0.0193578	0.0380953	-0.029042	0.00466151	0
90.8	-0.0246407	-0.00200204	0.045911	0.00970297	0.00968877	-0.0214984	0.00918399	-0.0403433	-0.0628708	-0.00217316	0
91	-0.00897412	0.023569	0.0113959	0.0223016	0.0151574	-0.0292479	-0.0343419	-0.0583976	-0.0440739	-0.0148424	0
91.2	0.0277	0.0294031	-0.04158	-0.0114025	-0.0341924	-0.0202787	-0.0291298	-0.0129627	0.000375094	0.00137688	0
91.4	0.0234442	0.00544267	0.0332931	-0.0122316	-0.0339849	-0.0142262	-0.00483174	-0.039605	0.0126308	0.00656578	0
91.6	-0.00250239	-0.0192252	0.0142354	-0.0184455	-0.00816656	-0.0297273	0.00311324	-0.0398279	0.0007741	-0.0386968	0
91.8	0.00220673	0.00431263	0.0153971	-0.0189402	-0.0137698	-0.0238051	-0.0305524	-0.021367	-0.00992228	0.0184411	0
92	-0.012527	-0.0327189	0.0120731	-0.0102866	0.00893171	-0.0356352	-0.00621575	-0.0382096	-0.0121822	0.00334404	0
92.2	-0.0095473	-0.0400978	0.00669629	0.00867708	0.0442068	-0.0245619	-0.0143724	-0.037	0.0303102	-0.0191745	0
92.4	0.00108772	-0.0130517	-0.00954271	-0.00318936	0.0389927	-0.00949589	-0.0433887	-0.0120026	0.0206055	-0.0421676	0
92.6	-0.0158882	-0.00933166	-0.0110928	-0.0152554	0.0036372	-0.0159408	-0.0124443	0.00254617	-0.038721	-0.0513536	0
92.8	-0.0126092	0.0363428	0.0418402	0.0209697	-0.0162	0.0103002	0.0160012	0.0191901	0.00197034	0.0491328	0
93	0.00181217	0.0639994	0.0145383	-0.0231184	-0.0141007	0.0199982	0.0349654	0.021734	-0.00797714	0.00893238	0
93.2	-0.0314723	0.0115487	-0.023221	0.0332117	0.0123357	0.0039685	0.0160996	0.0724301	-0.0181185	0.0293343	0
93.4	-0.0258345	-0.00640344	-0.0157253	0.0242237	-0.00156172	0.0114491	0.0109344	0.0552305	0.0613359	0.0125135	0
93.6	-0.00448888	-0.00189926	-0.00918849	-0.00644374	-0.00261976	0.0280009	-0.00489549	0.0288813	0.0406008	0.0143928	0
93.8	-0.0083271	-0.0198359	-0.00299916	0.0101714	0.0158665	0.0385793	-0.0374901	0.0279275	-0.0252109	0.0148964	0
94	-0.00373134	-0.00310375	0.0254289	0.00516041	0.00476971	0.0449531	-0.0369908	0.00620511	0.0268182	-0.0426554	0
94.2	0.00887545	0.0405148	0.0174469	0.010703	0.00928395	0.0232153	0.00340018	0.0282564	0.00614553	0.0269244	0
94.4	0.0252337	-0.0176669	0.00136314	-0.0189259	-0.0160532	0.0192789	0.0846475	0.0094274	0.0555511	0.0309593	0
94.6	0.0178726	-0.035093	-0.0305395	-0.0103913	-0.0132559	0.0167534	0.0483595	-0.0107075	0.0211547	-0.0111889	0
94.8	0.00861356	-0.00792967	-0.028849	0.00826019	-0.00483546	0.0314483	-0.013249	-0.0209924	-0.0214881	-0.00817412	0
95	0.0133676	-0.0531672	-0.018357	0.0149586	-0.00624069	0.0337775	0.00906601	0.00406541	-0.0269126	0.0134221	0
95.2	0.0110793	-0.0787918	-0.0283807	0.0143852	-0.0032764	0.00805652	0.0412021	0.0273971	-0.0382966	0.000129356	0
95.4	0.00750823	0.0307813	-0.00993787	-9.57926e-05	0.0120342	0.012607	0.0186237	0.00954332	-0.0355092	-0.0216431	0
95.6	0.0398019	0.0416305	0.0231013	0.00651139	0.0328258	0.0462713	0.0371319	0.0528886	-0.0147338	-0.0269035	0
95.8	0.0258929	0.0254277	-0.000100175	0.0337501	-0.0349178	0.00800298	0.0381387	0.0359993	0.0185998	-0.0331239	0
96	-0.00228348	0.0097641	0.0258848	0.00319151	-0.0137923	-0.0290674	-0.00142856	0.00259733	0.0298398	-0.0197817	0
96.2	-0.0146118	0.00501827	0.0110431	-0.0393168	0.00612555	-0.0212492	-0.0324424	-0.0165167	0.0186387	-0.0059527	0
96.4	-0.00643412	0.00599573	0.0010548	-0.0326093	-0.0143859	-0.0203377	-0.0274585	-0.05756	0.0271021	0.0092317	0
96.6	0.00400842	0.0165035	0.0348528	-0.0114909	0.0013202	-0.0396725	-0.0175004	-0.0672831	0.0369297	0.00924445	0
96.8	0.00376112	0.0449612	-0.044854	-0.00394994	-0.00686373	-0.0331108	-0.038303	0.00602778	0.00518014	-0.0245148	0
97	0.0319407	0.0312969	-0.0389792	0.0339373	-0.011259	-0.0347713	-0.0715151	-0.0242753	0.0221379	0.0219527	0
97.2	-0.0104413	0.0292956	0.0283177	0.00298744	0.0022236	-0.0131443	-0.0463194	-0.0142004	-0.00414962	0.0189483	0
97.4	-0.0172267	-0.025182	0.00525741	-0.0230719	-0.0223172	-0.0099324	-0.0153009	-0.00730273	-0.0423251	-0.0197918	0
97.6	0.00358622	-0.0457566	-0.0200324	-0.000676274	-0.0163961	-0.00361754	0.00224187	-0.0179068	-0.00961282	-0.00135074	0
97.8	-0.0152031	-0.027168	0.00463309	0.0106949	0.021598	-0.00353933	0.000434177	0.00855899	0.0198823	0.0360589	0
98	-0.0360726	-0.0482063	-0.0187975	-0.0215768	0.0152787	-0.038596	-0.0298612	0.0377335	-0.0185677	0.0232268	0
98.2	-0.0242924	-0.0161024	-0.03599	-0.0371956	0.0170737	-0.0326243	-0.0386452	0.0051113	-0.00450111	0.0176578	0
98.4	0.00571755	-0.0352476	0.0131935	0.00788371	-0.0131977	-0.0202734	-0.0287706	-0.0142352	-0.0139983	-0.013808	0
98.6	0.0313091	0.0338048	0.0261713	-0.0280111	0.00539852	-0.00603045	0.0214807	-0.0361316	-0.00544092	-0.00383803	0
98.8	0.0215442	0.0456941	0.0293518	-0.0233608	0.017818	-0.00828814	0.024893	-0.0220645	0.00331562	0.00278169	0
99	-0.0148647	0.0234307	0.0485013	0.0388052	0.00464892	-0.0094276	0.0040473	-0.0271847	-0.0166013	-0.0230133	0
99.2	-0.0140549	0.0261696	0.025184	0.0412004	0.0126108	-0.00412772	0.000443833	-0.0459565	-0.0326025	-0.0158014	0
99.4	0.0377044	-0.0185741	-0.0256572	0.00216799	0.0231793	-0.0219924	-0.0142103	-0.00605481	-0.0152597	0.0138323	0
99.6	0.0410468	0.0675235	0.0149559	-0.0181805	0.00518714	-0.0311964	0.0161922	-0.0434587	-0.00790212	-0.0376067	0
99.8	0.0153979	0.0876883	0.0503789	-0.0285685	-0.000473758	-0.0153687	-0.0439808	-0.022772	-0.0360209	0.0149044	0
100	-0.014186	0.011715	0.0182125	-0.00668826	-0.0113565	0.0202319	-0.0329754	-0.00862089	-0.00486392	-0.0108231	0
100.2	-0.0226864	-0.0377967	-0.000855644	0.0370266	-0.0241541	0.0249371	0.0407641	0.000393367	0.0103814	-0.0355039	0
100.4	-0.0143387	-0.00775467	-0.00797072	0.0395274	-0.0244206	0.0120638	0.0674729	0.00308525	-0.0153034	-0.00266453	0
100.6	-0.0234885	-0.000418409	-0.0335638	0.00925963	-0.003449	0.0099521	0.0286965	-0.00128763	-0.0115693	0.00313111	0
100.8	-0.047014	-0.0776925	-0.018692	0.00593961	0.0225548	-0.00628755	-0.0295717	0.0576354	-0.00966497	0.0242244	0
101	-0.0283388	-0.0628834	-0.043178	-0.045632	-0.0127607	0.0214599	-0.00735974	0.0829865	-0.00536846	-0.0032669	0
101.2	-0.00841491	-0.012808	-0.0160172	0.0123934	0.00255463	0.0290121	0.0165993	0.0473274	0.0330005	-0.00583378	0
101.4	0.00798012	0.0033855	0.0148674	0.0301828	0.000105549	0.0138151	0.00638069	0.0423892	0.0318451	0.0246521	0
101.6	0.0213545	-0.017811	-0.0118554	0.012639	-0.0156248	0.021098	-0.0162811	0.0516467	-0.00189776	0.034269	0
101.8	0.0108318	-0.0174343	0.0024658	0.0328824	-0.000976202	0.0573042	0.00780837	0.0222987	0.0312301	0.0416104	0
102	0.00287876	0.0222421	0.0656717	0.0191804	0.00884246	0.0680569	0.0612104	0.00598316	0.0791207	0.0565704	0
102.2	0.049322	0.0218835	-0.0123779	-0.0172288	0.0156813	0.0189502	0.0209812	0.0379785	-0.0215736	0.00187678	0
102.4	0.0415693	0.0215321	0.00342598	-0.028932	0.0232239	-0.0044659	-0.00671324	0.0174741	-0.0398543	0.00889055	0
102.6	0.017002	0.0196699	-0.00114611	0.0180762	0.0107435	0.0195768	0.0481006	-0.00129363	0.0210744	-0.0191193	0
102.8	0.0103815	-0.00390456	-0.0270837	0.0596192	-0.00987665	0.0297975	0.0808344	-0.00725688	0.0307597	-0.0174692	0
103	0.00246855	-0.0083102	-0.0425257	0.0221447	-0.017986	0.0201559	0.0139365	-0.0102832	0.0253267	-0.0124937	0
103.2	-0.0229584	0.0295815	-0.023876	-0.0384014	-0.00904465	0.0100196	-0.0332403	0.00324127	0.0280998	-0.0470039	0
103.4	-0.0368147	0.0417364	0.0375646	-0.0273542	0.00912772	-0.0121139	0.0254448	0.00872086	-0.0218263	0.000484243	0
103.6	-0.00993721	0.00214769	-0.00715666	-0.0130375	0.0158294	-0.0137753	-0.00366554	-0.0372834	0.000593546	0.0728192	0
103.8	-0.0169316	0.00915678	-0.00205122	-0.00169984	-0.00246769	-0.0241318	-0.0309028	-0.0345701	-0.0529143	0.0203484	0
104	0.000622679	-0.0136344	0.0203303	-0.0342839	-0.00101673	-0.0323629	-0.0436142	0.00889754	-0.0141795	-0.03568	0
104.2	0.0205525	-0.0217769	0.019393	-0.0404459	-0.0111865	-0.0234417	-0.0122272	-0.00254444	0.0132647	-0.00520538	0
104.4	0.0314	0.0408316	-0.00714989	0.00328905	-0.0176255	-0.0143733	0.0324089	-0.0187935	-0.0207738	0.0286187	0
104.6	0.0342994	0.0536286	-0.0232604	0.00283409	0.00770255	-0.0214171	0.00943775	-0.0168296	-0.00295272	0.000119236	0
104.8	-0.0219069	-0.0364287	0.0273427	-0.039234	0.00303376	-0.0272192	-0.0330236	-0.0951676	-0.00997468	-0.025485	0
105	-0.0140983	0.0128463	0.0234787	0.00637341	0.022359	-0.0166056	0.00475047	-0.0154876	0.0099495	-0.0352599	0
105.2	-0.0022353	0.00746792	-0.0632382	0.0213075	-0.0131718	0.00475524	0.0480755	0.0135814	0.0190535	-0.0103546	0
105.4	-0.0199792	-0.00955677	-0.0401707	-0.000179465	-0.00314881	-0.0133668	-0.0217237	0.00274051	0.027635	0.00273363	0
105.6	-0.000975446	-0.0240338	0.0326976	0.0209356	0.0203935	-0.00859595	-0.0756408	-0.0163566	0.0149999	0.00728739	0
105.8	0.0163403	-0.0431445	0.0433511	0.0411798	-0.00179575	0.0151847	-0.017918	-0.0253637	-0.029984	0.0121734	0
106	-0.0156587	-0.00861318	0.0331855	-0.00689375	-0.0103822	-0.0188148	0.000793724	0.00991324	-0.0251512	-0.0148479	0
106.2	0.0372999	-0.00253087	-0.0361102	-0.011792	-0.0275372	-0.0119251	-0.0560814	-0.000211122	0.0521457	-0.0390973	0
106.4	-0.00831687	-0.0147512	-0.00563938	0.010555	-0.0053022	-0.00720138	-0.0061961	0.015067	0.00154369	-0.00355884	0
106.6	-0.0277126	-0.050667	0.0131254	-0.0391584	-0.010601	-0.0108444	-0.0307624	-0.0594988	-0.0140201	-0.0115408	0
106.8	-0.020282	-0.0432576	-0.0242539	-0.0210976	-0.0181604	0.00399602	-0.00974267	-0.0326378	0.0122962	0.00918912	0
107	-0.0283453	0.0296364	-0.0319117	0.0208467	0.00115523	0.00624837	0.0184575	0.0720919	-0.00548466	0.0448955	0
107.2	-0.0243034	0.0645691	0.0219764	-0.0160147	0.00399399	-0.0102714	-0.0206327	0.0428401	-0.0373344	0.0047223	0
107.4	-0.0117263	-0.00422442	0.0566565	-0.00358792	-0.0101137	0.0123181	0.0508816	-0.000741056	-0.0252443	-0.0383904	0
107.6	0.000162876	-0.0393416	0.0238075	-0.00121227	0.0239639	0.0231399	0.0362746	0.0722744	-0.00427812	-0.0265866	0
107.8	0.00368268	0.0235487	-0.0181567	-0.00174281	0.0106336	-0.0163953	-0.0033692	0.0108989	-0.0111971	0.0113788	0
108	-0.0174559	0.0446953	-0.0608979	-0.0272073	-0.0113638	-0.00884616	0.000121704	-0.0155306	0.0175913	0.00613868	0
108.2	0.00488602	-0.0191227	-0.0384109	-0.0155232	-0.0190348	0.0212201	0.0218636	0.0163024	0.0409218	-0.0105474	0
108.4	0.0323863	-0.0442852	0.0212028	0.0484359	-0.00620085	0.0183035	0.0266559	0.00331473	0.0269444	0.0142075	0
108.6	0.00204561	-0.00991436	0.00659975	0.0597409	0.0173056	0.0153463	0.0292725	-0.0229002	0.0111813	0.0331483	0
108.8	0.0132774	-0.0442456	-0.0284945	-0.00477223	-0.00560037	0.0198311	0.0261535	-0.0249441	-0.00936613	-0.0114569	0
109	-0.00890351	-0.0356262	0.0124306	-0.00992292	-0.00925067	0.00115351	-0.0398087	-0.003927	0.0118162	-0.0195562	0
109.2	0.0216093	-0.0572964	-0.00346963	-0.00446977	-0.00809887	0.002285	0.0196659	0.0453724	-0.0352991	0.0350998	0
109.4	0.00115227	0.0427149	-0.0108926	0.0142957	0.00213575	0.0113631	0.00431264	0.0291616	-0.0236717	0.0273821	0
109.6	-0.02265	0.0901638	0.0283221	0.0243007	0.0108963	0.0123991	-0.0287831	-0.0240172	0.0320542	-0.00342586	0
109.8	0.0162767	-0.00607426	0.029743	0.00195966	0.0155427	0.0259376	0.0271788	-0.0461992	0.00522939	0.0281678	0
110	0.0173513	0.0164844	-0.0027059	-0.000676358	0.0353568	0.0276797	0.00570016	-0.0484639	-0.0382646	0.0410519	0
110.2	0.0149075	0.0455539	0.017444	0.0193968	0.041571	-0.0341264	-0.00334061	-0.00206943	-0.00410542	0.00110177	0
110.4	-0.00798098	0.0644343	-0.0160442	-0.0289901	0.020828	-0.00384984	0.00795328	0.00519373	-0.00919364	0.00864321	0
110.6	0.0043715	-0.0332154	0.0461812	-0.0108843	-0.0189655	0.00668753	0.0228078	-0.00719868	-0.0349759	-0.0447909	0
110.8	0.0378891	-0.0188578	0.018432	0.00888761	-0.0253263	-0.0106158	0.0177041	0.0200728	0.0312589	-0.0259206	0
111	0.0222929	0.0458869	-0.0626543	-0.0224336	-0.00655146	-0.0136503	-0.0328625	0.0391322	0.0384773	0.0157036	0
111.2	-0.012062	-0.00453378	-0.0112776	-0.0272228	-0.000753703	-0.0316279	-0.0628857	0.00327322	-0.0353864	-0.0357132	0
111.4	0.00700433	0.0377499	0.00533562	-0.0163986	0.00449599	-0.0493043	-0.00434122	-0.0053937	0.0463388	-0.0117141	0
111.6	-0.0229963	0.019828	0.0108756	-0.024746	-0.0110058	-0.00408456	-0.0251871	0.0266529	-0.038471	-0.00848952	0
111.8	-0.0110009	-0.0186172	-0.0295583	0.0364415	-0.0186239	0.00513492	-0.0499721	-0.0176936	-0.0284575	0.0275479	0
112	-0.00649152	-0.00504451	-0.0160312	0.0167838	-0.00725774	-0.0038751	-0.0235752	-0.0148371	0.0217069	0.00251202	0
112.2	-0.00643399	0.00126996	-0.0197682	-0.00656005	0.0155109	-0.00407128	0.011837	0.0104898	0.0255407	-0.0343016	0
112.4	0.00384519	-0.0146519	-0.0427823	0.0132704	0.0311164	-0.00683984	0.0400909	0.00412412	0.00534835	-0.0225136	0
112.6	-0.00809352	-0.0109081	0.0173788	-0.0287544	0.0232463	-0.0107847	0.0393792	0.0133467	-0.0271498	-0.00871385	0
112.8	-0.0103487	-0.0333961	0.0348348	-0.0267938	0.00205938	-0.00302712	-0.026587	-0.00406307	-0.0353113	0.0168286	0
113	-0.0173089	-0.0103804	0.0202866	-0.00717848	-0.00417555	0.0165121	0.0425279	-0.00747547	0.00116313	-0.0244834	0
113.2	-0.0100798	-0.0161593	0.0328509	0.0131888	0.00807332	0.00959846	0.0247265	-0.0470103	0.00911539	-0.0308267	0
113.4	0.00950313	-0.0155299	0.0372297	0.0135495	0.00410811	0.00810755	0.00782247	-0.0548755	-0.0254515	0.00364928	0
113.6	0.0322383	0.0320936	0.0285022	0.0305753	-0.028353	-0.00491513	0.0238392	-0.012519	-0.0248446	0.00260956	0
113.8	0.0188527	0.0496989	0.0160883	0.0312633	-0.0369276	-0.0251812	-0.00324912	-0.00971962	-0.00641618	-0.00817764	0
114	-0.0363541	-0.00409731	-0.0124489	-0.0397565	-0.00491855	-0.00339549	-0.0260314	-0.0392306	-0.0350096	0.0181092	0
114.2	-0.018459	-0.0181097	-0.00133115	-0.0228128	-0.0256629	-0.0146473	-0.0652374	0.0153705	0.00199006	-0.0184296	0
114.4	0.00674357	-0.0400102	0.00585649	0.0142516	-0.0274882	-0.00708172	-0.0231965	0.00292807	-0.00435389	0.00599457	0
114.6	-0.0334822	0.0128334	0.0197895	0.0506886	0.000500704	-0.0166575	-0.0474654	0.0148438	0.0555731	0.00153003	0
114.8	-0.0425197	0.0510173	-0.00390264	0.038388	-0.00257444	-0.0267058	-0.0439981	0.00701345	0.0477793	-0.0137646	0
115	0.0121831	-0.00711314	-0.0276515	-0.00986109	-0.00327375	-0.021466	0.000970751	-0.00107415	-0.00982687	0.00243337	0
115.2	0.0346653	-0.056786	-0.0116273	-0.0154504	0.0273574	-0.0122856	-0.011984	0.0450839	0.0222335	0.0104412	0
115.4	0.0110343	-0.0196933	-0.024943	0.0152558	0.0172927	0.013222	0.0132318	0.0234031	0.0157149	0.00979236	0
115.6	0.00612772	0.00433843	0.0274854	0.0200493	0.0408256	0.0186511	0.00889962	0.033942	0.0411602	0.00596494	0
115.8	0.019994	-0.0198789	0.0247671	0.0147603	0.014391	0.0456483	0.00952038	0.0478627	-0.00115859	0.00354688	0
116	0.0313562	0.00405139	0.00378344	-0.00171962	0.000934379	0.0271125	0.0320469	0.0235175	0.0120903	0.00213042	0
116.2	0.0274198	0.0605602	-0.0176895	-0.0401414	0.00722963	-0.00332914	0.0327472	-0.0189986	0.0298335	0.0446339	0
116.4	0.0212334	0.0524302	-0.0467998	-0.0302409	0.00699615	0.0209439	0.0141613	-0.0154585	-0.0248568	0.0453364	0
116.6	0.0166279	-0.0202707	-0.024334	0.0434226	0.0170492	0.0446542	0.0257082	0.0375794	-0.0456345	-0.0427663	0
116.8	-0.0138537	-0.0555678	0.0371017	0.0247595	-0.00357072	0.0145016	0.0503246	0.0407952	-0.0315139	0.00827638	0
117	-0.0291507	0.0108019	0.0134272	-0.00618585	-0.0224079	-0.00294552	0.0668007	-0.00882545	-0.0193763	0.0453672	0
117.2	-0.0346301	0.0166288	-0.00430844	-0.0152023	-0.00185045	0.0327291	0.0436779	-0.0562933	0.0514029	0.0122643	0
117.4	-0.0286222	-0.0268533	-0.00262316	0.00162363	-0.0130654	0.0136949	0.024799	-0.0509416	0.0330541	-0.0132551	0
117.6	9.00688e-05	-0.0545474	-0.00218605	0.00564399	-0.0356974	-0.0146763	0.0226594	-0.0265877	0.000686033	-0.00912404	0
117.8	0.000715602	-0.0300159	-0.0141039	-0.0247413	-0.00761798	0.00924114	-0.0031589	-0.0081181	0.03228	-0.0233458	0
118	-0.0494501	0.0244114	-0.0482305	-0.0355656	0.0237447	-0.014636	-0.044909	0.0285958	-0.029176	-0.0342285	0
118.2	-0.0107244	-0.0370705	-0.0274396	-0.000676385	0.0389057	-0.0150368	-0.0433113	0.0215138	-0.0279723	0.0301272	0
118.4	0.0275617	0.0375473	0.0263117	0.0131334	0.0285421	0.0240649	-0.0126607	0.00359161	-0.0729357	0.0443575	0
118.6	0.0252734	0.0485198	0.0139292	0.00500769	-0.033671	0.00407104	-0.0541656	-0.000452708	-0.0224065	-0.0020686	0
118.8	0.0111456	0.00170859	-0.00761009	-0.014119	-0.0252861	-0.0139319	-0.0549751	-0.0248649	0.0190031	-0.00960592	0
119	0.00791943	0.0140809	0.000747692	-0.0379114	0.0284652	0.00450488	0.00573807	-0.0457475	0.0222898	0.000597275	0
119.2	0.0114671	0.0356304	0.0135106	-0.0235164	0.00455418	-0.013265	-0.00341817	-0.0220391	0.0640939	-0.0291419	0
119.4	0.0182341	0.0399903	0.0554676	0.0392906	0.000963887	-0.0318507	-0.0305492	-0.000113168	0.00639912	-0.0261183	0
119.6	0.0376346	0.020474	0.0313773	0.0232493	0.0103859	0.00232676	-0.016931	0.0300368	0.0235238	-0.0368849	0
119.8	0.0439277	-0.0220542	0.0506177	0.014694	-0.025128	-0.00348778	-0.0243231	0.00571274	-0.027892	-0.003099	0
120	0.0172972	-0.0179478	0.0163582	0.00186484	-0.0211149	-0.0259921	-0.00744611	-0.0222408	-0.0457707	0.0369947	0
120.2	0.034199	0.0351926	-0.0222689	0.00524798	0.0250916	-0.0277272	0.0383411	-0.0167715	0.0508224	0.035946	0
120.4	0.0626348	0.0643774	0.0252794	0.0280438	0.0379224	-0.00868343	0.0396811	-0.00162316	0.0744491	0.00703079	0
120.6	0.00303404	0.0353322	0.0532417	0.011562	0.0237247	0.011763	-0.00411072	0.00934689	-0.0259695	0.00583274	0
120.8	-0.00621212	0.00169279	0.0377221	0.0158562	0.029305	-0.00297426	-0.00884202	0.00351425	0.0485458	0.0647491	0
121	0.0320681	0.0460922	0.072788	0.0522548	0.0415631	0.0274542	0.00504075	-0.0357882	0.0717885	0.0426542	0
121.2	0.0466832	0.0766499	0.0415855	0.0240873	0.0293791	0.0171956	0.0560352	0.0245695	0.0251512	-0.0271438	0
121.4	0.0479784	0.00547086	0.0351966	0.0215686	0.0223817	0.00301152	0.0561007	0.0455452	0.0666571	-0.0122613	0
121.6	0.0340624	-0.0450688	0.0632785	0.0562332	0.031865	0.0081765	0.038208	-0.00468366	0.0993136	0.0401971	0
121.8	0.0254138	0.0265622	0.0556379	0.040541	0.0122794	-0.00850796	0.0610135	0.0152027	0.0333755	0.0304419	0
122	0.0778198	0.0717309	0.0701054	0.0212125	-0.0239883	-0.0116308	0.0541004	0.0671422	0.0273158	0.0160082	0
122.2	0.0836813	0.0124335	0.0324743	0.0354841	0.0230696	0.0266703	0.0839398	0.0553746	-0.00711832	-0.00102092	0
122.4	0.047012	0.000956305	0.0725074	0.0381998	0.0230519	0.0564919	-5.06524e-05	0.0113469	0.0695846	-0.0418299	0
122.6	0.036136	0.0409016	0.0791555	-0.00982048	0.00210328	0.0420994	-0.0597358	0.0284533	0.110236	-0.019933	0
122.8	0.0226254	0.0140129	0.019804	-0.0177563	-0.00622269	0.0444062	0.0174599	0.0801913	0.0829721	-0.0170005	0
123	0.0373201	0.00802126	-0.00273199	0.0426724	-0.00982988	0.0770156	0.0803507	0.0802286	0.0661265	-0.0334385	1
123.2	0.111264	0.0824193	0.0186172	0.0666768	0.00241316	0.0987098	0.047264	0.0528344	0.0540329	0.0387658	1
123.4	0.115709	0.0340598	0.0148161	0.0447075	0.0243116	0.136335	0.0774322	0.0771174	0.0490864	0.0768166	1
123.6	0.132287	0.101585	0.0646292	0.0769412	0.0183909	0.139455	0.0196171	0.0520576	0.0686679	0.0233436	1
123.8	0.140599	0.0559408	0.0476018	0.0581181	0.00588859	0.0778686	-0.0146977	0.00748201	0.0434941	0.0380656	1
124	0.107415	0.0270176	0.0557839	0.0212906	0.0381842	0.064731	0.0446687	0.0359184	0.00625624	0.0569988	1
124.2	0.0726088	0.0829641	0.0921247	0.018494	0.0392426	0.0727545	0.0825583	0.0681305	-0.0159977	0.0122444	1
124.4	0.0727238	0.0930637	0.0743211	0.0307814	-0.00917054	0.0468675	0.0538725	0.0602151	-0.00348298	-0.0246015	1
124.6	0.0826646	0.0568198	0.062183	0.0347139	-0.00780314	0.0458426	0.0500457	0.0833905	0.0311528	0.00228781	1
124.8	0.0773482	0.0442361	0.0884688	0.00925715	-0.016478	0.0243758	0.040929	0.0585327	-0.0258702	0.0343641	1
125	0.0415881	0.0908463	0.0697282	-0.0179849	-0.0121316	0.0247098	0.0427551	0.0101719	-0.0170015	-0.0214716	1
125.2	0.0417949	0.0648796	0.0418165	-0.0125685	-0.00975476	0.0341078	0.0572331	-0.0196094	-0.0325741	0.00480008	1
125.4	0.0233512	0.0292473	0.0168921	-0.00458357	0.00111349	-0.00378416	0.0228065	0.00419459	0.0342725	0.0375827	1
125.6	-0.0137611	0.062223	-0.022053	-0.00161658	-0.000186929	-0.0304507	-0.0175016	0.0219368	0.0599585	0.0173531	1
125.8	-0.00226641	0.0717317	-0.0154386	0.00137942	-0.0137239	0.00289514	0.0171614	0.00842306	-0.0367416	0.0237295	1
126	0.0114849	0.025785	0.0616912	-0.0174005	0.00587757	0.000404393	0.0530523	0.0374576	0.0190336	0.0052199	0
126.2	-0.011337	0.0684179	0.0262011	-0.00147581	-0.0250077	-0.0137664	0.0313382	0.0173445	-0.0804025	-0.0522282	0
126.4	-0.0450812	0.00612196	0.0177501	0.0187482	-0.0180879	-0.0022327	0.0637819	0.0127463	-0.00879584	0.0328959	0
126.6	-0.0388844	-0.000780883	0.0124531	0.0412549	0.00891307	-0.00538423	0.0316726	0.034841	0.0487928	0.0153879	0
126.8	-0.026667	0.0570627	0.0150965	0.0311675	-0.00480304	0.00212026	-0.02398	0.0121065	0.0264602	-0.0341836	0
127	-0.0369108	0.0393477	0.0473579	0.00394129	-0.00876561	0.0102221	-0.00336639	-0.00697429	0.0169992	0.00314382	0
127.2	-0.0422144	-0.0121782	0.0539892	0.0168559	0.0350825	-0.0205387	0.0192479	0.0304214	-0.0156936	-0.00213157	0
127.4	-0.0464942	0.00730049	0.0365974	0.0311149	0.0110081	-0.00506972	0.000583276	0.00864248	-0.0227673	0.00585871	0
127.6	-0.0332849	0.0532744	0.0221008	0.043363	-0.0412555	0.0254922	0.0071173	0.0718765	0.00890665	-0.0292253	0
127.8	-0.0153093	-0.0183323	-0.024678	0.0221414	-0.0316263	0.0374371	0.0223327	0.0326587	0.0552041	-0.010128	0
128	-0.0105651	0.004301	-0.0611974	0.0216614	-0.00795518	0.0407771	0.0424425	0.0603423	0.0250359	0.0214427	0
128.2	-0.0317979	0.0466476	-0.038418	0.00467647	-0.0262653	0.0123929	0.0495278	0.0635848	0.00968867	0.00877137	0
128.4	-0.038778	-0.0215385	0.0117836	-0.0386786	-0.0436318	-0.0165608	0.0280544	-0.0261828	0.0269608	-0.00151808	0
128.6	-0.00128037	-0.00539683	0.0236291	0.00675148	-0.018347	0.0231404	0.0174574	0.042176	-0.0241305	0.0166806	0
128.8	-0.0092217	-0.00823951	-0.00306344	0.0703387	-0.00576796	0.0253078	0.0431058	0.00571967	0.0746533	0.00244506	0
129	-0.00566013	0.00523327	0.000622078	0.0278052	-0.00275558	-0.0106266	0.0446155	0.0271133	0.0667486	-0.0207093	0
129.2	-0.00505012	0.0454079	0.0146115	-0.0311798	-0.00128545	0.0303279	0.0449655	0.0310156	0.0157746	-0.0375255	0
129.4	-0.00605423	0.0447619	-0.0161107	-0.0347804	0.00686429	0.0595338	0.0682896	0.0511057	0.0212654	-0.0311774	0
129.6	-0.0136463	0.0131651	-0.0381958	0.0154052	0.011607	0.0328717	0.0811174	0.0635152	0.0251673	-0.0112554	0
129.8	-0.0247845	0.0128448	0.000628231	0.0580704	-0.00107703	0.0169938	0.0360484	0.00436028	-0.00796923	0.00144828	0
130	0.000782727	0.00480578	0.0111114	0.0124564	-0.0167562	-0.0158115	-0.038713	-0.000966295	-0.013595	0.0197949	0
130.2	0.00355286	-0.0387215	-0.0106257	-0.0379334	-0.0189981	-0.01091	-0.035989	-0.0294822	-0.0250782	0.0349546	0
130.4	-0.000398007	-0.0199872	0.00165201	-0.0303976	0.00413903	-0.0223034	-0.0157712	-0.00813892	-0.0413138	0.00731954	0
130.6	0.00441016	-0.0273602	-0.0331247	0.042561	0.0128451	-0.00807591	0.00963971	0.0291431	-0.00763238	-0.0235551	0
130.8	0.0007141	-0.0565258	-0.026706	0.0419056	0.000358488	-0.00171827	-0.00027997	-0.00075041	0.000507391	0.00205919	0
131	-0.00213683	-0.0275371	0.014662	-0.0480433	-0.00425873	-0.0248985	-0.0207685	-0.0508447	-0.0166236	0.0196687	0
131.2	0.00683829	0.0198655	-0.0442556	-0.0663747	0.00176511	-0.0153044	-0.00556032	-0.0378425	0.0149933	-0.0305754	0
131.4	-0.0146475	0.0285286	-0.0300072	-0.0320646	-0.00514267	-0.0091682	-0.0432933	-0.0312006	-0.0281092	-0.0199784	0
131.6	-0.013054	0.0430525	0.0012432	-0.0190465	-0.0218858	-0.0213613	0.00857108	-0.0291993	-0.0341807	0.00543585	0
131.8	-0.00275094	0.0225157	0.00498191	-0.0127771	-0.00554517	-0.0198693	-0.0214044	0.00682735	0.0122093	0.026595	0
132	-0.000309125	-0.00225826	-0.0195525	0.00223998	0.010619	-0.0100264	-0.0363367	0.00548963	0.0265851	0.0150307	0
132.2	-0.00568603	-0.0101912	-0.0241299	-0.00388256	0.0161475	0.00175224	-0.0246392	-0.00479107	-0.0187063	-0.0143311	0
132.4	-0.0132332	-0.017684	0.00232355	-0.00686728	0.0152098	0.00921011	-0.0556805	0.00438066	-0.0408242	-0.0180285	0
132.6	-0.00961557	-0.0139232	0.0129702	0.0318766	-0.0155553	-0.00615156	-0.0317548	-0.0375843	-0.0164893	-4.59884e-06	0
132.8	0.00729098	-0.0143652	0.0279269	-0.00218586	-0.0193225	-0.0114283	-0.0454562	-0.0185001	-0.0670227	0.0142942	0
133	0.00240872	-0.0361248	-3.52271e-07	-0.0122248	-0.00331344	0.0115719	-0.0126861	-0.0259591	-0.00659502	0.00354733	0
133.2	-0.0259184	-0.0460573	0.00956556	0.0403547	0.0116853	-0.0120624	-0.000170649	0.0104108	-0.00178303	-0.010429	0
133.4	-0.0177934	-0.042004	0.0220035	0.0469082	0.00274416	-0.0253824	-0.00277975	0.00968991	-0.0354568	-0.00430318	0
133.6	-0.00163815	0.00306478	0.0132626	-0.00347386	0.00290475	-0.00833925	-0.00349664	-0.0309653	-0.00839609	0.0104174	0
133.8	-0.0261074	0.0570998	0.0156215	-0.00768719	0.029463	-0.0323613	-0.00219304	-0.00328674	0.0320347	-0.0155485	0
134	-0.0166545	0.004009	-0.0152767	0.0103243	0.0112908	-0.0489285	0.0385078	0.00649948	0.0652992	-0.0582761	0
134.2	-0.00790255	-0.000472193	0.00924058	-0.0170612	-0.00800629	-0.0155392	-0.0335853	0.0161348	0.0355572	0.0483497	0
134.4	0.0442976	0.00238491	0.0664371	-0.011842	0.0249213	-0.000460542	-0.0395092	-0.000440612	-0.0171471	0.02803	0
134.6	0.0313141	0.0166471	0.0174022	-0.0157671	0.0218419	0.0136442	0.0375141	0.0193139	-0.00607148	0.00138626	0
134.8	-0.0094348	0.00863015	-0.00932293	-0.0301292	-0.00907866	0.0260808	0.0536911	0.0269817	0.0369592	-0.00550721	0
135	0.0133308	-0.0152075	0.03248	0.00435626	-0.00405743	0.0359292	0.0165655	-0.0144525	0.0164255	-0.0371368	0
135.2	0.0187555	-0.00133397	-0.0232069	0.0351075	-0.000405928	0.0414903	0.044883	-0.00255025	-0.0302844	-0.00122524	0
135.4	-0.0251591	-0.0185001	-0.0318978	-0.017528	-0.0224296	-0.0154749	0.0687812	0.0569478	0.0205024	-0.00794117	0
135.6	-0.0091547	0.052327	-0.0451712	0.0248983	-0.024917	0.0474811	0.0445717	0.0688173	0.0428893	0.0292505	0
135.8	0.00520911	0.035456	0.0016009	0.0184693	-0.0116662	0.0443352	-0.0220241	0.0139929	0.0415734	0.0185652	0
136	0.0233725	-0.00422861	-0.0129521	0.00522795	-0.010315	0.0231717	-0.0070064	-0.000691644	0.0194681	0.00501865	0
136.2	0.00898853	0.00286416	-0.0565641	0.00677167	-0.01229	0.0283085	0.0222717	0.0035973	0.00439332	-0.0203333	0
136.4	-0.0288239	-0.0123177	-0.0199265	-0.0166227	-0.0124584	-0.00324669	-0.0243262	-0.0094502	0.000937503	-0.0642447	0
136.6	0.015172	-0.0189819	-0.00809561	0.00165069	-0.0197216	-0.00901544	0.000595391	0.0333376	-0.0355054	-0.00317784	0
136.8	-0.010629	0.00833514	0.0362809	-0.0407703	0.0129661	-0.0218801	0.0327577	-0.00743741	-0.0232479	0.0266992	0
137	0.0330746	0.0130324	0.00582318	-0.00636289	-0.00480442	-0.0301104	-0.0429538	-0.012598	-0.0675494	0.0525355	0
137.2	0.0281558	-0.0374626	-0.0220265	-0.00889718	-0.00627107	-0.0244655	-0.0194649	-0.0116052	-0.0296712	-0.00278768	0
137.4	-0.0281145	-0.0548372	0.0193728	-0.0416662	0.0212943	-0.0192113	-0.00253527	-0.044158	0.0239577	-0.00577303	0
137.6	-0.0317941	-0.010543	0.0382473	-0.0218997	0.0244563	-0.0101616	-0.0529355	-0.0727184	0.00671202	0.0594584	0
137.8	-0.00966541	-0.00258489	-0.0100167	0.00469572	0.00825799	0.00821278	-0.00896956	-0.0360489	0.0132806	0.0222001	0
138	-0.0161012	-0.0397692	0.00509529	-0.00951911	-0.00409651	0.00770037	0.00720837	0.0390168	0.0148744	-0.0123781	0
138.2	-0.00802311	-0.000120742	0.0414302	-0.0529394	-0.0222509	0.00750389	-0.00821449	-0.0511669	-0.0215644	0.00244094	0
138.4	0.01505	0.0805561	-0.0182722	0.0329891	0.0128633	-0.0123819	-0.0460369	0.00113408	0.0265773	-0.0114289	0
138.6	0.0118148	0.0415581	-0.0519837	0.0820383	0.0287883	-0.0150374	-0.0349831	0.0223069	-0.00341671	0.00582462	0
138.8	-0.0105803	-0.00600094	0.00908183	0.0396981	0.0054416	0.00790916	0.0112448	-0.0344002	-0.0435783	0.0156439	0
139	-0.00467809	0.0281583	0.0500287	-0.00710042	-0.00451616	-0.00234907	0.0291711	-0.0277876	0.00633368	-0.0287199	0
139.2	0.0197939	-0.00387948	0.00960965	-0.0365298	-0.0106638	-0.0412198	0.0156139	0.000854403	-0.0131618	-0.0434779	0
139.4	0.00392957	-0.00588401	-0.0167123	0.0417906	-0.019722	-0.00911891	-0.0225922	0.0910374	-0.00831258	-0.053684	0
139.6	0.0126602	0.0424171	-0.0247697	0.00786872	0.0148495	-0.00714124	-0.00940174	-0.0041649	-0.0254041	-0.0100904	0
139.8	-0.00217072	0.00346968	-9.83496e-05	0.0177262	0.00854922	0.00427282	0.0526824	-0.0264359	-0.0111956	0.00102069	0
140	0.00525922	-0.0544861	0.0185919	0.0111385	-0.0176412	0.0180748	0.0426026	0.0132472	0.0536408	-0.0230338	0
140.2	0.0321678	-0.0247484	0.0101702	-0.037619	-0.0101371	0.0112223	0.0138993	0.0173683	0.0613656	0.00617488	0
140.4	0.0199418	0.0308149	0.0156506	-0.0217951	0.00796962	0.0109344	0.0438124	0.0276804	0.0023058	0.0527061	0
140.6	0.0164549	0.022491	0.0244057	-0.0201797	0.0128318	0.0219699	0.0109608	0.00872073	0.0186744	0.00177996	0
140.8	0.00759901	-0.0260949	-0.0418904	-0.0179591	0.0114796	0.0267392	0.0130908	0.0182147	0.00387135	-0.00564364	0
141	-0.0136755	-0.0648295	-0.00415946	-0.00903046	0.0112653	0.00754934	-0.0340063	-0.00133392	-0.0542644	0.050805	0
141.2	-0.0074133	-0.0175705	0.0185546	0.00373779	0.0095612	-0.0139328	-0.0386975	-0.0266675	-0.0218706	0.0398967	0
141.4	-0.00772393	0.023206	0.00645589	0.00903737	0.013481	-0.0363036	-0.0551358	-0.0344503	0.00580571	-0.0088587	0
141.6	-0.0250382	-0.0010444	-0.00660916	0.00108022	0.00150055	-0.0375181	-0.0586962	-0.0215547	-0.0393392	-0.0276712	0
141.8	-0.0232021	-0.00650992	-0.0451637	0.00353092	-0.0253847	-0.00817343	0.0209793	-0.00505673	-0.0345407	-0.0304163	0
142	-0.0384526	-0.000402966	-0.00585028	0.0383428	0.000562439	-0.0199636	-0.0349412	-0.0198136	-0.0142328	0.00685877	0
142.2	-0.00890636	0.0130713	-0.00658617	0.0403832	-0.00227696	-0.0179258	0.0453492	0.036792	-0.00927959	-0.031899	0
142.4	0.00773506	-0.0169523	0.00577768	-0.00598723	-0.00998265	-0.00783546	0.00387934	0.0200191	0.0474394	-0.019152	0
142.6	-0.0190567	0.0120389	0.0224686	-0.00715189	-0.0222452	0.0139976	-0.0249714	-0.0216571	0.0555007	-0.0142108	0
142.8	-0.0273327	0.0549208	0.0217924	0.00256183	-0.00615942	0.0305726	0.0364295	-0.00814104	0.0263374	-0.0442272	0
143	0.010566	0.0165445	0.0179669	-0.0265914	0.0192601	0.0177535	0.0390451	-0.00141359	0.0186355	-0.0119666	0
143.2	0.0318004	-0.0115256	-0.00317738	-0.00719666	-0.0146666	-0.0130357	0.00988685	-0.0237723	-0.018779	0.0485936	0
143.4	0.0210097	-0.0207731	-0.0264297	0.0218012	0.00485207	-0.0405241	-0.00728585	0.0215329	0.0242568	0.0116786	0
143.6	0.00174465	-0.0138321	0.0359952	0.00349461	0.00649358	0.00779421	0.0113527	0.0450399	0.0774949	-0.0114899	0
143.8	-7.91989e-05	-0.00156581	0.0177999	-0.0215134	-0.00345884	0.0116478	0.00433242	0.0119682	-0.0267539	-0.0294663	0
144	-0.0055569	0.0109911	-0.0148165	-0.0393446	-0.00189579	0.0302427	-0.0377879	-0.0223176	-0.0554767	0.000513977	0
144.2	-0.015907	-0.00168738	0.000918793	-0.0234172	0.00384377	0.0525816	-0.0246661	-0.0205269	0.0107937	0.0376423	0
144.4	-0.00109361	-0.0262285	-0.0119865	0.0285829	0.00121525	-0.0142413	0.024655	-0.00646878	-0.0247055	0.0105539	0
144.6	0.0180015	-0.00596664	-0.00203423	0.0257002	-0.0106196	-0.0323508	-0.0221091	-0.0139733	-0.000313311	0.020159	0
144.8	-0.00115366	-0.0172805	-0.000268734	-0.00310253	-0.00899414	-0.00345492	0.00891214	-0.0349435	-0.0186217	0.0230304	0
145	0.00240863	0.00638073	-0.0156005	0.00565907	0.0118453	0.0106399	0.0517081	0.0213507	-0.0225748	0.00981058	0
145.2	-0.0200281	0.0105526	-0.00413361	-0.00555909	-0.010268	0.0320316	-0.0396011	0.0286603	-0.00931856	-0.00754401	0
145.4	-0.0212288	-0.0303646	-0.00264742	-0.00594256	-0.00895802	0.00911393	-0.0731562	-0.0306745	-0.00388632	-0.00412034	0
145.6	0.00288279	-0.0157043	-0.0154236	0.0100694	0.0124389	-0.0446573	0.00549378	-0.0236726	0.015567	-0.016972	0
145.8	-0.0161681	0.0606616	0.0142372	-0.0210061	-0.0234491	-0.0289756	0.000621918	0.0305487	0.0266983	-0.0492299	0
146	0.0297829	0.0220125	0.0123091	-0.00263756	0.0148736	-0.0265933	0.0605562	-0.00953097	-0.0444906	0.0230333	0
146.2	0.010704	-0.0324381	-0.0291288	0.0222434	-0.0156479	-0.039048	0.0348006	0.00437657	-0.0365075	0.0317247	0
146.4	0.0165891	-0.0174371	-0.00661935	-0.0172892	0.0102245	-0.0140786	0.00681687	-0.0296928	-0.0145351	0.0175038	0
146.6	0.0163873	0.0394008	0.0114525	0.0113559	0.0312203	0.0137328	0.00888513	-0.0249044	0.0114496	-0.00738582	0
146.8	-0.00990533	0.0374153	0.00543635	0.0359272	0.0133921	0.00494713	-0.00440791	-0.0182645	0.0172411	-0.0212124	0
147	-0.00224721	-0.00624416	0.0304744	-0.0267729	0.00357453	-0.00973438	-0.0295228	-0.0631406	0.0198122	0.00753527	0
147.2	0.00807992	0.00899895	0.0446209	0.00205361	-0.0360832	-0.000940093	-0.0259385	0.00778813	0.0684813	0.0204124	0
147.4	-0.0203705	-0.030258	0.0411046	0.00173989	-0.0137568	-0.00326067	0.00377628	0.0420773	-0.0443606	0.000373028	0
147.6	-0.00993102	-0.0337272	-0.0108094	0.0160931	0.0113711	-0.0105766	-0.00528246	0.0354744	-0.0746681	0.00515794	0
147.8	-0.00316362	0.041782	-0.0236391	0.00475418	0.0190524	0.00121216	-0.0230773	0.00916747	-0.0292422	-0.000620258	0
148	-0.00982957	0.0183504	0.00366006	-0.0203091	0.00693831	0.0279807	-0.0357346	0.00962869	-0.00783467	0.0172495	0
148.2	-0.00775219	-0.0524227	0.000560359	-0.0202793	0.000754709	0.0259566	-0.0371797	0.0262441	0.0422905	0.0144265	0
148.4	-0.000900932	-0.00748879	-0.0319219	-0.00547752	0.00971529	-0.00407579	0.00340113	0.0105667	0.0893163	-0.0578567	0
148.6	0.0105075	-0.0228478	-0.0392992	0.0160954	-0.0217432	-0.00187209	0.0501066	0.00279183	-0.0284494	-0.0422765	0
148.8	-0.00887071	0.00847576	-0.0238078	0.0180726	-0.0386041	-0.0173447	0.00383312	0.022589	-0.00398011	-0.00503854	0
149	-0.00968375	-0.00125465	-0.00878469	0.0157701	0.0102475	0.0181681	-0.0104478	9.45868e-05	0.0344703	0.0122966	0
149.2	0.0273789	-0.021601	-0.0161868	0.0413134	0.0274627	0.00978842	0.000483631	-0.0294637	0.0202389	-0.0189448	0
149.4	0.0321723	-0.0114468	0.00508988	0.00503284	0.00167842	-0.0112531	-0.0017836	-0.0217751	0.0148469	-0.00682016	0
149.6	0.00335033	0.0111455	0.0386629	-0.0594077	-4.80139e-05	0.016946	0.0323682	-0.0173961	-0.00246378	0.0370471	0
149.8	0.00417234	0.0148059	0.00377804	-0.00589931	0.00763723	0.0124015	0.0696847	-0.00698269	-0.0411884	-0.0109613	0
150	-0.0175559	-0.040076	-0.0040742	0.00621245	-0.000395755	0.00967719	-0.0226989	0.086725	0.0225975	-0.00860477	0
150.2	0.034066	-0.0204498	0.0314014	-0.0140612	0.007923	0.0112224	0.00575755	0.0102721	-0.0283937	0.0303156	0
150.4	0.0260085	0.0122033	0.0309151	-0.015662	0.00716622	0.0279069	0.0103544	0.0180909	-0.0121668	0.0167742	0
150.6	-0.0241917	0.0450444	-0.035626	-0.0141219	-0.00616806	0.0353013	0.0233351	0.0496732	0.0349602	0.00864505	0
150.8	-0.0246858	0.0474416	-0.050868	-0.00594014	-0.00832288	0.0160778	0.0292468	0.00451855	-0.00689664	0.0394445	0
151	0.00611859	0.00313877	0.017949	0.000776693	0.00636277	0.000137085	-0.0367745	-0.0116916	-0.043597	0.0203916	0
151.2	0.0101215	0.00282592	0.0129162	-0.0230044	0.0151091	0.0106719	-0.0118013	0.000205387	0.000731459	-0.051944	0
151.4	-0.0282356	-0.00782942	-0.0180403	0.0264574	0.00084655	0.0117298	0.0233487	0.0317453	-0.000414091	-0.027362	0
151.6	-0.0419766	-0.0239079	-0.0210701	0.00687901	0.00886714	0.0100599	-0.0438256	-0.0148566	-0.002456	-0.0109018	0
151.8	-0.0495251	0.00366917	-0.0296261	-0.0161536	-0.0100515	-0.0130442	-0.070998	-0.0266189	0.0108926	0.0156214	0
152	-0.0323836	0.0219891	0.0139497	0.0122756	-0.0182992	-0.0101185	-0.00759758	0.0122263	0.0443026	0.0217068	0
152.2	-0.00183916	-0.0114769	0.0424537	0.0230436	-0.00569778	-0.000916171	0.0392472	0.0164362	0.0521994	-0.0236892	0
152.4	0.00106257	-0.0104994	-0.0389577	-0.0145101	-0.0260165	-0.0377604	0.0150902	-0.0265744	0.00900006	-0.0351641	0
152.6	0.0220481	0.0452382	-0.0263072	-0.0252335	-0.0173084	-0.0232995	-0.013845	-0.065041	0.00325014	0.0215954	0
152.8	0.00183867	-0.0482802	0.00106505	0.0152776	-0.00560691	-0.0141471	0.0246593	0.00217789	-0.030604	0.0416786	0
153	0.0360083	-0.052555	-0.0275816	0.00808532	-0.00355989	-0.0307883	0.0414173	0.0383917	-0.00954371	-0.00547723	0
153.2	0.0437236	0.0215863	0.0404952	0.00170147	-0.00534167	-0.0203582	0.00778724	-0.00599177	-0.00487626	-0.0266813	0
153.4	0.0145833	0.0443556	0.0672859	0.0200631	0.00296642	0.00328832	-0.0170763	-0.0508913	-0.0328731	0.00439531	0
153.6	0.0224755	0.0146785	-0.0396665	0.0145987	0.0242147	0.00049455	0.0019121	-0.0104067	-0.0367845	0.026665	0
153.8	0.0244142	-0.00868284	-0.0126856	0.0125296	0.0296818	0.000996082	0.00500041	0.0434722	-0.038	0.0266889	0
154	-0.000794203	0.0164791	0.050917	0.0505677	-0.00522618	0.0126548	-0.0557612	-0.0561986	-0.00780348	0.0292812	0
154.2	-0.00222052	0.0154454	0.0304069	0.019587	-0.0104536	0.0094663	0.00532499	0.0193171	0.0496682	-0.0156581	0
154.4	0.0460173	0.00951401	0.014238	-0.000125897	0.0120128	0.0102409	0.0279692	0.0229813	-0.0391033	-0.0328915	0
154.6	0.0362662	0.0212362	-0.00453125	-0.00939365	0.00687326	0.00161417	0.0264971	-0.0569192	-0.0369187	-0.00846128	0
154.8	-0.0196851	-0.00839104	-0.0213704	-0.00700035	-0.0135456	-0.00404893	0.0334117	-0.0266274	0.0599955	0.00767989	0
155	-0.0195354	-0.0683583	-0.0071203	0.00645832	-0.00718737	0.00673245	-0.0198927	0.0479543	0.00487452	-0.0130822	0
155.2	-0.0162665	-0.0284056	-0.0269097	-0.037386	0.00276315	-0.010171	-0.0509118	0.0155759	-0.0132575	-0.0363778	0
155.4	-0.0154421	0.0365779	0.00260267	0.00541413	0.0164652	-0.0150617	-0.0355005	-0.00568705	0.046236	0.0294719	0
155.6	0.00194234	0.00219617	0.0322489	-0.050437	0.00420982	-0.0165112	-0.0583475	-0.0293381	0.0283676	-0.00327875	0
155.8	-0.0257425	0.0106161	-0.00654195	-0.0145185	-0.0260008	0.00198171	-0.00970157	-0.0178921	-0.0346225	-0.0383532	0
156	-0.03665	0.0263165	-0.033458	0.0122582	-0.0178212	-0.00722813	0.0286769	-0.0281125	-0.0139017	-0.0075074	0
156.2	-0.0114528	-0.00588436	-0.00660467	-0.038313	0.0120926	-0.0179924	-0.00644552	-0.0542917	0.0442364	0.0145306	0
156.4	-0.0271792	0.0116414	-0.00436061	0.0135303	0.00879116	0.0301295	-0.00247462	0.00108807	0.00973684	0.0132733	0
156.6	-0.0110333	0.010829	-0.00478256	-0.0279805	0.0249169	0.0146895	-0.00822323	0.0270947	-0.0378077	0.0158568	0
156.8	-0.0165269	0.0143717	0.0157061	0.00805045	0.0283632	0.00156388	0.0687027	-0.0199496	-0.0340231	-0.0285784	0
157	0.00578058	-0.0177179	-0.000505384	0.0281628	0.00140319	-0.01346	0.040177	0.0211142	-0.0285452	0.0148976	0
157.2	0.0166652	-0.0311167	0.00497275	0.00830783	-0.0131947	-0.0184685	-0.00426825	0.0435557	0.0230964	0.0194858	0
157.4	-0.00800357	-0.0293691	0.0446361	-0.0047644	-0.0172597	-0.00376615	0.00438792	0.0133608	0.0529906	-0.0280504	0
157.6	-0.0124356	-0.0480842	0.03745	-0.00162884	-0.0191391	0.0216622	0.0131322	0.00633418	0.00895466	-0.0211807	0
157.8	0.0146592	-0.0318585	-0.0121921	0.0231183	0.00891555	0.038382	0.0366426	-0.00612844	0.0169846	-0.0120657	0
158	0.0132921	-0.00474164	-0.015923	0.0479645	0.00869352	0.00134599	-0.00834159	0.0567013	0.027213	0.0388641	0
158.2	-0.0093536	-0.0259965	-0.0138017	0.00096713	-0.00351392	-0.00566233	-0.000886075	0.0482328	0.0278979	0.0211714	0
158.4	0.00746593	-0.02625	-0.000526575	-0.0222089	1.69342e-05	0.0117855	-0.00101028	-0.0450866	-0.0112913	-0.0240028	0
158.6	0.0167113	0.00772022	0.00977561	-0.0119862	0.0109207	0.0135058	-0.0144731	-0.0243313	-0.0299095	-0.0347806	0
158.8	0.0017181	0.048168	0.00408503	0.01038	0.00419717	0.00424518	0.000854013	0.0589582	-0.00947014	0.000416276	0
159	0.00822239	0.0579485	-0.0110731	0.0194093	-0.0229531	0.00670555	0.0144878	0.0277989	0.00985403	0.0362814	0
159.2	-0.00142268	0.0113001	-0.0350044	-0.035161	-0.0297542	0.0179551	-0.000841714	0.0283946	0.030333	0.013255	0
159.4	-0.0133474	0.0518851	-0.0111662	0.0299302	0.0221155	0.030087	-0.0159145	0.0280829	-0.0373051	0.0206421	0
159.6	0.0271	0.00229283	0.0156492	-0.0161721	0.00022449	-0.00614576	-0.0151934	0.0166074	0.0167325	0.019927	0
159.8	0.0246367	-0.0460549	-0.0170026	-0.0151374	-0.00710348	-0.0245519	0.00371579	-0.0320163	0.0179673	0.014931	0
160	-0.026705	-0.0233877	-0.0260636	0.0360646	0.0231402	-0.00314477	0.0115616	-0.0327531	-0.0178007	-0.000251659	0
160.2	-0.0336532	0.00651258	0.0169095	0.00271509	0.0113136	-0.0143192	0.0143646	0.0193959	0.025664	-0.0115642	0
160.4	0.000137681	0.0257047	0.00451294	-0.0186216	-0.00955906	-0.0423946	0.0218798	0.0133301	0.0140769	-0.00212886	0
160.6	0.00377924	0.0240219	-0.0291219	-0.00921319	0.0111299	0.0210908	-0.032862	0.0153702	-0.0299686	-0.0382545	0
160.8	0.00368214	0.0216751	-0.0468153	-0.0268976	-0.0171378	0.0103998	-0.0357573	-0.0353189	-0.0140561	0.00370795	0
161	0.00206023	-0.00516269	-0.026746	-0.0285779	-0.022202	0.00537033	0.0163569	-0.0424608	-0.0339984	0.00718016	0
161.2	-0.00433479	-0.00384394	0.00326515	0.00534663	-0.0173296	0.0104177	0.015752	-0.0231022	-0.00114342	-0.0158662	0
161.4	-0.00894714	-0.000755994	0.0200277	0.0127532	-0.0235407	-0.00112615	-0.0279856	-0.0227818	0.0253619	-0.0159761	0
161.6	0.00401675	-0.0281076	0.03717	-0.00982857	-0.0161346	0.00315036	-0.0220625	-0.0143194	-0.0479953	-0.0174388	0
161.8	0.0254048	-0.00538714	0.0447787	0.0186759	-0.00988376	0.0211409	0.0110381	-0.0065734	-0.0431792	-0.00906763	0
162	0.00382276	0.00367461	-0.0035891	0.0308666	0.00971853	0.0331324	0.00772104	-0.0238551	-0.00451232	0.00848343	0
162.2	0.0268473	0.0150187	-0.00540586	-0.0323777	0.0227407	-0.00226435	0.0032194	0.0551668	0.0834524	0.0113034	0
162.4	0.0164036	-0.0138107	0.0132663	-0.0342369	0.0101068	-0.0407714	-0.00246721	0.0337859	0.00511294	0.00964374	0
162.6	0.00712532	-0.00392238	0.0273341	0.0412304	0.0203709	-0.0163638	-0.0304715	0.00187508	-0.0454037	-0.00467807	0
162.8	0.0229332	0.0168063	0.0222825	0.0595661	0.0348962	0.00640802	-0.00584988	0.0241517	0.0359475	0.0105984	0
163	0.00349855	-0.0218089	-0.000250682	-0.00638798	0.00271499	-0.018491	0.0581846	-0.0253722	0.0028487	0.0486008	0
163.2	0.0122538	0.0298976	0.0166828	-0.0281769	0.00486562	0.0215978	-0.0240012	-0.011607	-0.0466502	-0.00580584	0
163.4	0.0109751	-0.00750255	-0.00992404	-0.00927453	0.024411	-0.00531291	-0.0269117	-0.00482004	0.0335815	0.0258786	0
163.6	-0.0250396	-0.00672126	-0.015077	-0.0236838	0.00217924	-0.0115887	0.0397601	0.0234739	0.00978538	0.00613883	0
163.8	-0.0334106	-0.00574087	-0.0235234	0.00591444	0.00519106	-0.0169514	0.0507211	0.0357018	-0.00981682	-0.00957929	0
164	-0.011183	-0.0160125	-0.00253506	0.0428133	0.00707283	-0.00773477	0.00372817	0.00384865	-0.0297318	0.00207003	0
164.2	-0.0211341	-0.0101171	0.0282488	0.00844714	-0.0232973	0.0148864	-0.0207758	-0.0166982	-0.0359275	-0.00761699	0
164.4	-0.0426405	-0.0522842	-0.0236003	-0.00892233	-0.0131312	-0.0134017	-0.00731187	0.00518618	0.0790985	-0.00486767	0
164.6	0.00699021	-0.0709935	-0.0112693	0.0235726	-0.013089	0.00902084	0.00695048	-0.00311165	-0.0417998	-0.0266257	0
164.8	0.0142612	0.0203436	-0.0102758	-0.00109831	0.0059926	-0.00931156	0.0144925	-0.0478588	-0.0358571	-0.0315329	0
165	-0.0304968	0.0837076	-0.00851658	-0.0109436	-0.0164904	-0.0176292	-0.0121654	-0.0340921	-0.0153661	-0.0271422	0
165.2	-0.0151671	0.0429258	0.0211663	-0.00898109	-0.00863491	-0.0143419	-0.0151525	-0.0306415	-0.000876995	-0.0305975	0
165.4	0.0105781	0.0201965	0.0550227	-0.0180862	0.0314183	-0.00628307	-0.00566272	-0.0117219	-0.000815185	-0.0120329	0
165.6	-0.00394021	0.055842	0.0390848	-0.0190418	0.0165827	0.00972501	-0.0312951	0.039341	-0.0288788	0.00758607	0
165.8	0.0517262	0.0147363	-0.0204158	-0.0153587	-0.00549175	-0.0068065	-0.0292153	-0.03739	0.0425996	-0.0169306	0
166	0.00545405	0.00803963	0.00208164	0.0323405	-0.0098247	0.00413573	-0.0125401	-0.0181812	-0.00367308	0.0531025	0
166.2	0.0216627	0.0147333	0.0012026	-0.00265667	0.0144034	0.00209244	0.0338487	0.0572618	-0.00577587	0.0174231	0
166.4	0.0187958	0.00379853	-0.0301913	-0.0130557	-0.00720597	0.0178777	0.0233103	0.0225039	-0.00907225	-0.00486639	0
166.6	0.0213984	-0.0170177	0.00661069	-0.00197622	-0.0438529	0.0254637	-0.00779398	-0.0275244	0.031819	0.0259053	0
166.8	0.0403155	-0.0249752	0.0597132	-0.0209415	-0.0217156	0.0008143	0.00534879	0.00138076	0.0598176	0.0349048	0
167	-0.00810808	-0.0217815	0.00332663	-0.0049284	0.0245975	0.00457419	0.0337749	0.0192053	-0.0335758	0.0337771	0
167.2	0.00584329	-0.0356406	-0.0529816	0.0296358	0.0309403	0.0305493	0.0604369	0.0287336	0.0218546	0.011947	0
167.4	-0.0216518	-0.0386196	-0.0224852	0.0460435	0.0202282	-0.0178826	-0.0108073	-0.00757548	0.0569198	0.0158816	0
167.6	-0.0468928	-0.0110875	-0.00314405	-0.00821178	0.00881179	-0.00895092	-0.061731	-0.0494444	-0.0115714	-0.00296953	0
167.8	-0.0220286	0.00969297	-0.0152365	-0.0159572	-0.00667654	-0.0210501	-0.0548487	-0.0291654	-0.0257432	-0.0115875	0
168	-0.0112379	-0.00764547	0.00335575	0.01864	-0.00954164	-0.049989	-0.0203853	0.0046968	0.0102857	-0.0170124	0
168.2	-0.0184782	-0.0216092	0.0323057	-0.0121242	0.015051	-0.0137028	0.020979	-0.0081295	-0.0151654	-0.034939	0
168.4	0.0264629	-0.00637121	0.0120031	-0.0331179	0.0287904	0.01001	0.0353275	-0.0124124	-0.031784	-0.0286413	0
168.6	0.0122593	-0.0316377	0.0157308	0.0465102	-0.0132149	0.0213268	0.0241683	0.0185464	-0.00323633	-0.0564343	0
168.8	-0.0182571	0.0338289	-0.0167733	-0.0157695	-0.0351591	0.0193153	0.0696915	0.0627046	-0.0493453	-0.0171499	0
169	-0.0064181	0.0213052	0.00418008	-0.0279191	0.00359123	0.0470538	0.0298884	0.0379067	0.00786537	0.0231755	0
169.2	0.0102294	0.0162935	-0.0126752	0.0266221	-0.0134764	0.0372713	-0.0179887	-0.00893972	0.0859142	0.0194814	0
169.4	-0.00240839	0.0339107	-0.0711235	0.0138018	-0.0574833	0.00900801	0.0283492	0.0122423	0.0481138	0.00355953	0
169.6	-0.0138061	-0.00549046	-0.0215788	-0.0160724	-0.0122856	0.0253228	0.0442262	0.0611302	-0.00897904	0.00385355	0
169.8	-0.00216296	0.0595582	0.0383812	0.0115511	0.00891754	-0.00672074	-0.028444	0.0406195	-0.00947341	0.019866	0
170	0.0176217	0.00231124	-0.0410758	-0.0139072	-0.0156492	-0.0149447	-0.00740717	-0.00292655	0.00958459	0.0200047	0
170.2	0.0196167	-0.0255483	-0.0368883	0.0021817	0.00432216	0.0106778	0.00849618	-0.0673934	-0.0146693	0.0194334	0
170.4	0.00635524	0.0213442	0.0204424	0.0190636	0.0146458	0.0104922	-0.00482271	-0.0308286	-0.0250134	0.0116449	0
170.6	-0.0100972	0.00519573	0.0236006	0.0123629	0.0158407	-0.0238719	-0.0171182	0.0177096	0.00955926	-0.0290031	0
170.8	-0.0284177	-0.0497811	-0.0102486	0.0035477	0.0115592	-0.0338636	-0.00647469	-0.0297283	0.0493692	-0.0426102	0
171	-0.0248871	-0.0165748	-0.0125328	-0.0148318	-0.0203773	0.000643328	0.00254051	-0.0506232	0.0313269	0.00237602	0
171.2	0.0200951	-0.0115387	0.0371223	-0.0152618	0.0230268	0.0112372	-0.0567766	-0.00458683	-0.0595999	-0.0271514	0
171.4	-0.0255452	0.0215403	0.0277935	-0.0288923	0.0166125	-0.0166172	-0.031443	0.0179491	-0.0198438	-0.00182338	0
171.6	-0.0337863	0.027975	0.0146472	0.00452873	0.00377004	0.00176214	-0.0588035	0.0153571	0.0163728	-0.00729655	0
171.8	-5.74364e-05	-0.0036884	0.0111058	0.0268804	0.0087837	0.0144314	-0.030762	0.0169081	0.0401434	-0.00487034	0
172	0.0127884	-0.0160122	-0.0207272	0.00353861	0.00493708	-0.00859238	0.00532851	0.0117102	0.0177118	0.0286834	0
172.2	0.00941546	0.0173403	-0.0327585	-0.0296125	-0.00735421	-0.0179379	-0.0487195	-0.0185069	-0.0524345	0.0351448	0
172.4	0.0033616	0.0415095	0.0237468	-0.05257	-0.00370864	-0.0198731	-0.0114571	-0.0375802	-0.0346773	0.0340879	0
172.6	0.00438916	-0.00460202	0.0159941	-0.00169199	0.0149293	-0.0249848	-0.00954916	0.000723219	-0.0717651	0.0374605	0
172.8	-0.0147627	-0.0152202	0.0223501	0.0237125	0.000707099	-0.00592492	-0.0106141	0.0111143	-0.0319543	0.0510753	0
173	-0.000254565	0.00780217	0.0139487	0.0257653	-0.0172322	-0.00213248	0.0207275	-0.036393	-0.0244721	-0.0145756	0
173.2	0.0311587	-0.0130084	0.0272316	0.0150495	-0.0180872	-0.00478213	0.0348807	-0.0682103	-0.0139825	-0.0167273	0
173.4	0.023224	-0.0244003	0.0289831	0.00579889	0.00376041	-0.0160199	-0.00355323	-0.00969694	0.010362	0.0164402	0
173.6	0.0105993	0.0237595	-0.0379481	0.00641318	0.0214998	-0.0389583	-0.0146752	0.0592683	-0.0152085	-0.052132	0
173.8	0.0401772	-0.00978811	-0.0333793	-0.0254316	-0.00757167	-0.0121165	0.0581561	0.00167295	0.0348504	-0.0151469	0
174	0.000203639	-0.0565697	-0.0179398	-0.0282828	0.028468	-0.0158042	0.0214307	-0.00925333	0.0208324	-0.0287629	0
174.2	-0.0201036	-0.0196856	0.00283033	0.0182843	0.0217967	0.00804689	-0.0193619	0.00597155	-0.0273773	-0.0047865	0
174.4	0.000515955	0.0237851	-0.00738298	0.0354557	-0.00240864	0.0175527	-0.00589668	0.0144638	0.0578345	0.0140341	0
174.6	-0.00485399	0.0348712	0.0194392	-0.000558358	0.00629218	0.0238125	0.0270649	0.00351761	0.105661	-0.00395923	0
174.8	-0.0199802	0.0236651	0.0293481	-0.0214554	-0.00243576	0.0442548	0.0284421	-0.00105659	0.0143155	-0.0172121	0
175	0.00449649	-0.0125511	-0.0672601	-0.0047682	-0.0396352	0.0195448	0.0035029	0.0368673	0.0237009	-0.016277	0
175.2	-0.00947714	-0.00527062	0.0155214	-0.015942	-0.0123149	0.00697886	0.0323743	0.0517675	0.0625026	-0.00288908	0
175.4	0.0150888	-0.0269473	0.0315282	-0.00288594	-0.00173247	0.0435423	0.0214875	0.0369412	0.0318127	-0.0643419	0
175.6	0.00118187	-0.000323622	-0.00419268	0.0288207	-0.0322304	0.0557967	0.0373751	0.063128	-0.039753	0.0166384	0
175.8	-0.0266801	0.0325996	0.000972383	0.000211195	-0.0345245	0.0516043	0.0424555	0.039331	-0.0499187	0.057198	0
176	-0.0087448	-0.00577156	0.00811134	-0.00642671	-0.00875467	0.0403742	0.0315099	-0.000333054	-0.0183204	0.0178776	0
176.2	0.01712	-0.0208487	-0.0177391	0.0426922	-0.000216792	-0.0017336	0.0377502	0.0537063	-0.0202403	0.033527	0
176.4	0.00925268	0.0401194	-0.0181751	-0.0119006	0.00488813	-0.0323413	-0.00821386	0.0679585	-0.0169388	-0.0324853	0
176.6	0.00751847	-0.061822	-0.0137583	-0.00301322	-0.0150843	-0.0119239	-0.0360447	-0.0282751	0.00921838	0.00244901	0
176.8	0.0291058	-0.00876824	0.0252937	0.0103432	0.0144064	0.0124374	0.0142193	-0.058654	0.0426026	0.0269487	0
177	0.0155262	0.0519018	0.00617869	0.0108115	0.021622	0.01109	-0.0110722	-0.0235186	0.0233673	0.0132447	0
177.2	-0.0276154	0.00155888	-0.027559	0.00298011	-0.00554249	-0.017437	-0.037475	-0.00211183	-0.0110955	-0.00253714	0
177.4	-0.0101968	-0.0409073	-0.0293049	-0.00665053	0.00526606	-0.0379265	-0.0129629	-0.0230185	-0.00475173	0.0129942	0
177.6	0.0530708	-0.0197241	-0.0312502	0.00641404	0.0325434	-0.0175171	-0.0384647	-0.0613438	0.000388359	0.0332897	0
177.8	0.0208203	0.0144435	0.032584	0.0237448	-0.000109744	0.00139858	-0.0173714	-0.0632277	-0.0303645	-0.0271882	0
178	1.5798e-05	0.0285415	0.0623298	-0.00714573	0.0148736	-0.0247019	-0.0214236	-0.0280436	-0.0144597	-0.0473842	0
178.2	-0.0320214	-0.0304321	0.0272189	-0.0168576	0.00426319	-0.0224101	-0.0175011	-0.019547	-0.00379058	0.0171896	0
178.4	-0.0284369	-0.0116521	-0.0200378	-0.00596711	-0.0281091	-0.0142448	-0.0262911	0.016431	-0.0279191	0.0139024	0
178.6	-0.00115334	0.0257654	-0.0146444	-0.00869206	-0.0208779	-0.0209995	-0.0254191	0.0174	-0.0309199	-0.0393463	0
178.8	-0.00564353	0.0191631	0.010914	-0.000655724	0.0088556	-0.0210023	-0.00234765	-0.0496806	0.0105775	-0.0151347	0
179	-0.00501194	0.0666181	0.00791697	0.0208564	0.0236235	-0.0177919	-0.0120384	-0.0553759	0.0233697	0.0230445	0
179.2	0.0147252	-0.0305868	0.0530918	-0.0140065	0.0595734	-0.00507584	0.002204	-0.0578038	-0.0300878	-0.00396016	0
179.4	0.014294	0.0460634	-0.0234054	0.0272338	0.0178988	0.00346435	0.0168352	-0.0106579	-0.0512541	0.021372	0
179.6	0.0121862	0.00569782	-0.0334283	-0.0335409	-0.017834	-0.0173331	0.0162594	0.048973	0.0358309	0.0197129	0
179.8	-0.00264249	-0.0302764	-0.00501001	-0.028943	-0.0261278	-0.0139195	0.00254003	0.0433108	0.0313363	-0.0200491	0
180	-0.0260025	0.0341096	-0.015585	0.048735	-0.0318617	0.00444739	-0.0054246	0.0306768	-0.0405818	-0.00218687	0
180.2	-0.0238739	-0.00851655	0.0106288	0.00293027	-0.018203	-0.00560024	-0.00339492	0.0424635	-0.0187423	0.0412832	0
180.4	-0.00673052	-0.0404318	0.0307808	-0.00420854	0.00437393	0.00880357	-0.00856385	-0.0261953	-0.0378967	-0.00888196	0
180.6	0.00243807	0.00626907	-0.0182675	-0.041735	0.0118273	0.0133889	0.00876761	-0.0242589	0.0172955	-0.0195506	0
180.8	-0.00686205	-0.0206807	0.0103573	-0.0437607	0.0138952	0.0243021	0.0152786	-0.0409102	0.0016666	-0.0178819	0
181	-0.000629867	-0.00671985	0.00810105	-0.0384111	-0.0168106	0.0136449	0.019396	0.0094432	-0.0164123	-0.000926404	0
181.2	0.00678657	-0.0170156	0.00986052	-0.00162665	-0.0188432	0.0118036	0.0162747	0.07662	-0.000214725	-0.00210123	0
181.4	-0.0123703	-0.054333	0.03617	0.0558594	0.00918409	0.0383732	-0.0119542	0.0489695	0.0367022	-0.0154059	0
181.6	-0.0173855	0.0179237	-0.0216332	0.0265118	-0.0138085	0.0339749	-0.0229722	-0.00653335	0.0859807	0.0118027	0
181.8	0.0225332	-0.0155631	-0.025034	-0.035412	-0.00832902	-0.00520283	0.0312939	-0.0184527	0.0190044	0.0170356	0
182	0.0081919	-0.00893107	-0.0342846	0.013194	0.0262696	-0.0225047	0.0377043	0.0185612	-0.0538249	0.0190729	0
182.2	-0.0145342	0.0157465	-0.0454337	0.0221093	-0.00831554	-0.0204891	0.0290418	-0.0110899	0.00697553	-0.000723826	0
182.4	-0.00510198	0.00618524	-0.0157337	0.00756916	-0.0150537	0.00628617	-0.0153088	0.0181918	0.0367074	-0.0263884	0
182.6	0.0147322	0.0219302	0.0285537	0.00930731	0.0184789	0.0198764	-0.00680784	0.0476089	0.0242456	-0.0198846	0
182.8	0.0274573	0.0529448	0.0289828	0.0113887	0.0215806	-0.00632401	0.0639162	-0.00438006	0.0415193	-0.00250862	0
183	0.0348715	0.00667267	0.00199325	0.0312879	0.0283604	-0.0193831	0.00490275	0.0162847	-0.0167768	-0.0019167	0
183.2	0.0248459	0.0142684	0.00513128	-0.00355771	-0.00456412	-0.0101483	-0.0544836	-0.0431075	-0.016081	0.0443968	0
183.4	0.0560516	0.0491965	-0.00992682	0.0173065	0.023677	0.0116787	-0.00915521	0.00409024	0.00556685	0.019072	0
183.6	0.038271	0.036596	0.00725956	0.0168991	0.0402494	0.0159457	0.0253112	0.0363655	-0.0133784	0.0410177	0
183.8	0.037277	0.0328704	0.0230212	0.0141303	0.0187304	0.00520414	0.0202363	-0.000688597	-0.0114778	0.0632379	0
184	0.0692438	0.0212068	0.00619695	0.0464173	0.0224514	0.0202214	0.0128534	0.00894705	0.00576234	0.0517975	0
184.2	0.0461623	-0.0074608	0.00649229	0.0373084	0.0544153	0.0514478	0.0119477	0.0529753	-0.0014671	0.0617998	0
184.4	0.0422051	0.0860462	0.0120198	-0.00904827	0.0468733	0.0276041	0.0383568	-0.00147038	0.0379284	0.012281	0
184.6	0.0419174	0.0810476	-0.0203865	0.0217763	0.0119164	-0.00488933	0.0295074	-0.0265333	0.0099583	0.0270073	0
184.8	0.0470175	0.0773278	-0.019063	0.0183555	0.0360423	0.00846594	0.00305166	0.00436918	0.0294993	-0.00599914	0
185	0.044874	0.0315017	0.0224171	0.0443631	-0.00596908	0.0548031	0.0414227	0.00831597	-0.00535127	-0.0468814	0
185.2	0.0470441	0.0444014	0.0879874	0.0407081	-0.0335015	0.0678068	0.030734	0.0122738	-0.0155065	-0.00214526	0
185.4	0.0628861	0.105465	0.114878	-0.00242866	0.0214959	0.0488065	-0.0380649	0.059039	0.0321556	0.0614558	0
185.6	0.0585874	0.0105672	0.0387308	0.0424192	0.016591	0.0541904	0.0166871	0.0621964	-0.00334934	0.0509357	0
185.8	0.0262867	-0.0224661	-0.0202295	0.0176914	0.0358987	0.0526248	0.0602104	-0.000916786	0.0732724	0.0433123	0
186	0.0459811	0.0431655	0.0366214	0.0115392	0.0231406	0.0672843	0.0276057	0.0414731	0.103972	0.00819515	1
186.2	0.121655	0.0812669	0.0502148	0.00596019	0.0147593	0.116183	0.105744	0.124641	0.11139	0.0681956	1
186.4	0.152096	0.0879332	0.0507971	0.0365965	0.0142154	0.144547	0.129243	0.145383	0.0818896	0.0792042	1
186.6	0.125519	0.127386	0.0626595	0.0622547	0.00737373	0.131121	0.0445457	0.125973	0.0507505	0.0283196	1
186.8	0.122599	0.143756	0.0526222	0.0507062	-0.000219681	0.114891	0.0503641	0.117816	0.0648908	0.048654	1
187	0.144798	0.0925652	0.0695725	0.0875267	-0.006783	0.11424	0.117087	0.0961789	0.047325	0.0540523	1
187.2	0.13938	0.157306	0.0225851	0.0499107	0.00614133	0.125287	0.104914	0.0627105	0.034869	0.0559287	1
187.4	0.11875	0.102978	0.0533879	0.00523084	0.00396289	0.112125	0.0667793	0.0853549	0.050204	0.0576374	1
187.6	0.1014	0.100078	0.0629058	0.00506931	0.00538677	0.0502812	0.121249	0.0721485	0.0546206	0.0368386	1
187.8	0.0918345	0.111221	0.0210745	0.0240783	0.00414451	0.0299833	0.129822	0.0174242	0.0311245	0.0153497	1
188	0.0907837	0.0393032	0.00369874	0.0102861	-0.00566766	0.0377378	0.047005	-0.0106695	0.0143715	0.0417765	1
188.2	0.0778321	0.0236328	0.0116974	-0.0155485	-0.00351159	0.00825092	0.0567767	0.00595877	0.0155396	0.0741721	1
188.4	0.0391705	0.0480432	0.0027126	0.016453	-0.000774376	0.0555177	0.104619	0.059159	0.00351671	0.0215193	1
188.6	0.0557545	-0.00303941	-0.037984	0.00302833	0.00115876	0.0637905	-0.00369317	0.0735092	0.0259088	0.017852	1
188.8	0.0205886	-0.0247129	-0.00276722	0.000546567	0.0137203	0.030327	0.00186933	0.0613273	0.0138098	0.0428083	1
189	0.00973287	0.01913	0.00103016	0.00937051	0.0164821	-0.00231328	0.0278026	0.0511283	0.0426887	0.059549	0
189.2	0.022988	0.00477462	-0.0348846	0.00716939	-0.0156605	-0.0057289	-0.0142276	0.0498019	0.0506008	0.0570621	0
189.4	0.00938681	-0.0171201	0.000571057	0.0203764	-0.0473969	0.00360992	-0.00467929	0.0283555	-0.00812702	0.0228169	0
189.6	0.0158096	0.07416	0.0395368	0.0331638	-0.0250098	-0.0117368	0.0570641	-0.0245006	0.0137831	-0.0180557	0
189.8	-0.0161387	0.0167497	-0.0293408	-0.0150209	0.00237637	-0.0240867	0.0597865	-0.0364212	0.0486755	-0.000632653	0
190	0.00143867	0.0264882	0.00280368	0.0388414	-0.0169633	0.00233751	0.0178333	-0.0221558	0.0195868	0.00830101	0
190.2	-0.00943942	0.0714925	0.0402272	0.029604	-0.0108755	-0.000145772	-0.0265978	-0.010699	-0.0313831	0.029324	0
190.4	-0.0359041	0.0421807	0.0429213	-0.0251614	-0.00246887	-0.0162813	-0.0341468	0.0111283	-0.0228719	0.013469	0
190.6	-0.0300814	-0.00123252	0.0101047	-0.0095259	-0.0287841	-0.0147759	0.0314005	0.0166503	0.0194821	-0.0090249	0
190.8	-0.025802	-0.00855292	-0.037692	0.0228896	-0.0194953	-0.0152321	0.0835312	0.00566077	0.0131098	0.0213362	0
191	-0.0342856	-0.0479689	0.000182656	0.00609043	0.0408078	-0.0110981	0.0147106	0.0289561	-0.0142082	0.0186688	0
191.2	-0.0128799	-0.010401	0.000982211	0.0161709	-0.00816268	0.00997077	0.0408883	-0.0198351	0.0166622	0.0163974	0
191.4	-0.0230483	-0.00933358	-0.0248533	-0.008186	-0.0162655	0.0191661	-0.00517539	0.0266781	0.0119488	0.00702621	0
191.6	-0.0157323	-0.0157247	-0.0276147	-0.00201071	-0.00487455	0.00305223	-0.0293013	0.016778	-0.0172254	-0.0194295	0
191.8	-0.00872448	-0.0337083	0.00541424	0.000282793	-0.00155312	-0.0132568	-0.00502346	-0.0350955	-0.0076029	-0.0178416	0
192	-0.0188595	-0.0408103	0.0302692	-0.0231635	0.00881058	-0.00795573	0.00995386	0.00309361	0.0111793	-0.00985129	0
192.2	0.00782593	0.00956473	0.000574309	-0.0108694	0.00211018	0.0124385	0.0406618	0.0430305	-0.0143784	-0.0444149	0
192.4	0.0245376	0.000371916	-0.038615	-0.0299827	-0.00637767	0.0240409	0.0362728	-0.000573959	-0.014199	-0.039297	0
192.6	-0.00989609	0.0224103	0.00201654	-0.0212721	-0.00096298	-0.0123818	-0.0125319	-0.0126194	0.0422498	-0.0357868	0
192.8	-0.0215197	0.0401485	0.0455152	0.00219943	-0.00870309	-0.00611108	-0.00162555	0.000743721	-0.0124511	-0.0253998	0
193	-0.0146178	-0.021203	0.025897	0.012899	-0.0223262	-0.0237236	-0.0294791	-0.000740327	-0.040181	0.00158136	0
193.2	-0.0291038	-0.0415891	-0.0148741	0.0127631	-0.0303987	-0.0436782	-0.0941859	-0.00813999	0.022907	0.0184763	0
193.4	-0.0399757	-0.00312298	-0.0223318	0.012353	-0.014385	-0.0121915	-0.0600471	-0.0221248	0.0434277	0.0198138	0
193.6	-0.0166235	-0.0485537	-0.0190371	0.00976502	0.015534	-0.027827	0.0108027	-0.0395406	0.018733	0.0281417	0
193.8	-0.0138779	0.023562	-0.0361819	0.00534765	-0.0304661	-0.0467309	-0.0326374	0.0182856	0.0145001	0.0145408	0
194	-0.015766	0.0121863	-0.0452196	0.0188551	-0.0108148	0.00789804	0.0147653	0.0179905	-0.0398434	-0.00454921	0
194.2	0.0235575	-0.0345268	-0.00354928	0.00815999	0.0138225	0.00705467	-0.0148775	-0.027288	-0.0262156	0.00231458	0
194.4	0.0155217	-0.00929497	0.00273356	-0.0269543	0.0115867	0.019272	-0.00752949	-0.036843	-0.0171475	0.00269748	0
194.6	-0.0380242	0.0208574	-0.0059523	-0.0133791	0.0145488	0.0339982	0.0376876	-0.0155022	-0.0565774	-0.0182518	0
194.8	-0.0265059	0.0070808	0.0308897	0.0197944	0.0239107	-0.026264	-0.0151533	-0.0328993	-0.0332984	-0.0166871	0
195	0.00991812	0.0304186	0.00628865	-0.0355913	0.0305041	2.16503e-05	0.0468029	-0.0709022	0.0144422	0.00626098	0
195.2	0.0166625	-0.0224944	0.0282987	0.00222966	0.00982422	-0.010027	0.0255256	0.00140049	0.0155979	-0.009925	0
195.4	0.0188069	-0.0335981	-0.00605614	0.016088	-0.00531079	-0.0223215	8.12839e-05	0.0392296	0.022927	0.019983	0
195.6	0.0208461	0.020237	-0.00834862	-0.00861559	-0.0322455	-0.00247565	0.00694122	0.0393752	0.0180975	0.0374019	0
195.8	0.0106632	0.0314074	0.00462441	0.000876293	-0.0185706	0.0230779	-0.0250021	0.0635952	0.00138216	0.00610372	0
196	-0.00217519	-0.0383477	-0.00796194	0.0109024	0.00563428	0.026071	-0.0276903	0.0510449	-0.0235683	-0.007593	0
196.2	-0.00956195	-0.0441325	0.0108467	-0.0230755	-0.0306407	0.0133132	0.0526746	-0.0130956	-0.0456539	0.0155161	0
196.4	-0.0245229	0.0943991	-0.0303789	0.00182282	0.0143985	0.00257709	-0.00941907	0.0238308	0.0140285	0.00215759	0
196.6	-0.00500199	0.0101299	-0.0280395	0.0202738	-0.0112718	-0.00507347	-0.0103709	-0.00999606	0.00988525	-0.0375148	0
196.8	-0.00478787	-0.0518598	0.0392958	0.0124134	0.0112462	0.0151486	0.0105363	0.0441011	-0.00945441	-0.0112708	0
197	0.00140419	-0.00859883	0.0257107	-0.00890294	0.0189698	-0.000642593	0.0227445	0.0138414	0.00277675	-0.00977447	0
197.2	0.0152612	0.0102337	-0.0208593	-0.0171889	-0.00624014	-0.0137202	0.0483817	-0.0497255	0.0421041	-0.0268676	0
197.4	0.0117567	0.00953399	0.00558212	-0.00684333	0.00708019	0.0174516	0.0363912	0.00347406	0.0623333	0.014934	0
197.6	0.0207768	0.0409195	0.00366215	-0.000809485	-0.00191312	-0.00786741	-0.0276444	-0.0599061	0.0145175	0.0421035	0
197.8	0.00695415	-0.00512147	0.0158465	0.00966364	0.00873195	-0.0298054	0.00138401	-0.086196	-0.0181976	0.0560456	0
198	0.00411386	-0.00920828	0.00964407	-0.0115019	0.0259893	-0.0396571	-0.0301584	-0.00445854	-0.019167	-0.0248519	0
198.2	0.029721	0.0427254	0.0354736	-0.0195365	0.00839985	-0.00143681	-0.0194717	0.00104841	0.00086543	-0.0346222	0
198.4	0.0399546	0.0517705	0.071988	-0.00297118	0.00803718	0.0111074	-0.0215694	-0.0418267	-0.0169472	0.00361325	0
198.6	0.000399032	0.0068312	0.0206443	0.0224338	0.0182704	-0.0321519	-0.0317639	-0.016221	-0.0335037	-0.0150858	0
198.8	-0.0319416	-0.00636721	-0.0530409	0.0381197	-0.0125946	-0.0187557	0.0278184	0.015522	-0.0171678	-0.0308731	0
199	0.00167399	0.00543333	0.00556923	0.00993282	-0.0099344	0.053625	-0.0231779	-0.00557877	-0.0672729	-0.00903645	0
199.2	-0.0205729	-0.0410248	-0.0529055	-0.00490698	-0.00870073	-0.00447421	-0.0105303	0.0144006	0.00229919	-0.0262185	0
199.4	-0.034151	-0.0316451	-0.0218701	-0.022218	-0.0281198	-0.0174985	-0.017534	-0.0050071	0.00346402	-0.0428496	0
199.6	-0.0154071	-0.0101229	0.00418527	0.00144815	-0.0156937	-0.0194513	0.000260583	-0.0497023	-0.0237031	-0.0219679	0
199.8	0.0110769	-0.0117099	-0.022622	0.00633215	0.00288845	-0.0214054	-0.0194973	-0.0125417	0.0262655	0.0139425	0
200	0.0099297	-0.00588482	0.00839545	-0.0288174	-0.0194636	0.0025652	-0.0628156	0.067107	0.0722875	0.00840891	0
200.2	-0.0260389	-0.000222404	0.0443865	-0.00311065	-0.0259288	-0.00153386	0.00383338	0.0596249	0.0307333	-0.010593	0
200.4	-0.0131772	0.0225877	0.00371807	0.0140013	0.0194543	0.0331811	-0.0222941	0.0385161	-0.000900433	0.0638208	0
200.6	0.0381214	0.0468687	0.00487316	0.0129902	0.0172147	-0.00592279	0.053308	0.00966314	-0.0110805	0.0269125	0
200.8	-0.000778956	-0.00711896	-0.0453893	0.0151118	0.0220106	0.012419	0.0454863	0.0177406	0.0187005	0.005948	0
201	-0.0102098	-0.0200672	-0.0430849	0.0174957	0.00113382	0.0333278	-0.0130316	0.0507	0.0381697	0.0287464	0
201.2	0.0116587	0.0117173	0.026535	0.00663467	-0.00143479	0.000575729	0.0131357	0.029913	0.0262098	0.0123183	0
201.4	-0.0279903	-0.0170552	0.0110922	-0.00736371	0.0350437	-0.000291295	0.040938	-0.0453163	-0.00747548	-0.0219017	0
201.6	-0.00595364	-0.0210215	-0.0412373	-0.00823105	-0.0298137	0.0195986	-0.00692944	-0.0647158	-0.0633569	-0.016724	0
201.8	0.00282341	0.00473149	-0.025242	-0.0155224	-0.0280127	0.00118669	0.0140209	-0.0227004	-0.0316621	-0.0138069	0
202	-0.0100656	-0.0042101	-0.0127789	-0.0071823	0.0266376	0.0156482	0.0284497	-0.00115871	0.00780636	0.014547	0
202.2	0.00139805	-0.0581187	-0.0384985	0.00421452	-0.00322431	0.0230354	0.0238832	-0.00768951	0.00849899	0.0161615	0
202.4	0.0095003	-0.0231426	0.00819475	-0.00180069	-0.0344025	0.0113797	-0.00278052	0.00435942	0.0464311	-0.036733	0
202.6	0.00114921	0.0376723	0.0560015	-0.023294	-0.00595962	-0.001798	-0.0454133	0.0236654	0.0669123	-0.0236333	0
202.8	0.0142826	-0.0326681	-0.0166929	-0.0181374	-0.0121652	-0.0203104	-0.0472829	0.0207856	-0.0207016	0.0541003	0
203	0.0191435	-0.0429672	-0.000314486	0.0353907	-0.00462634	-0.0088626	-0.000198187	0.0371582	-0.0417654	-0.0383364	0
203.2	0.00623982	-0.0142404	-0.0123946	0.00475871	0.0221916	0.0096994	0.0109561	0.0223731	-0.0285159	-0.032575	0
203.4	0.000865985	0.0152213	0.00783937	0.0018635	0.00159569	-0.059885	-0.00221672	-0.0105627	-0.0129303	0.0523223	0
203.6	-0.00840063	0.0142665	0.0150045	-0.00522709	0.0149385	-0.0475085	-0.0295594	-0.0065898	0.0124936	0.0135825	0
203.8	-0.0118062	0.0194422	-0.0109466	-0.0162268	0.0244372	0.0141887	-0.0365581	-0.0226032	-0.00930705	-0.0166312	0
204	-0.00930335	0.0430502	-0.00838898	-0.00120868	-0.0117586	0.00585529	-0.0194507	-0.0738287	-0.0346248	0.0564513	0
204.2	-0.0209259	0.0263544	0.00269371	-0.0238679	0.00884826	0.0162663	-0.00877964	-0.0453197	0.035412	0.0128062	0
204.4	-0.000201413	0.00659806	-0.0212595	-0.0172253	0.00267322	-0.0313209	0.0372037	0.00564127	0.00968374	-0.0266632	0
204.6	-0.0223801	0.000301062	0.0233833	0.0407341	0.0160438	-0.0165398	-0.0202431	-0.0282814	-6.55579e-05	-0.0364305	0
204.8	-0.0123033	-0.0284319	-0.0209031	0.00541637	0.00871521	-0.00665801	0.00477953	-0.0719269	-0.00626003	-0.0102379	0
205	0.0144338	0.000583102	-0.0425016	0.00189042	0.00561669	-0.0228717	0.0389057	-0.0203529	-0.0224896	0.00177573	0
205.2	0.00757705	0.0248335	0.0264366	0.0240732	-0.00574463	0.000933648	0.00574354	0.057999	-0.0138163	-0.000320971	0
205.4	0.00055958	-0.0444347	0.0426822	-0.0237867	-0.0404097	0.0414216	0.0177011	0.0323595	0.00555395	0.00586377	0
205.6	0.0112065	-0.0432573	0.0169244	0.0219534	-0.00354851	0.0196116	0.0315721	-0.0321286	-0.00878646	-0.0171847	0
205.8	0.00471894	-0.0147786	-0.032656	-0.0405648	0.0159275	0.0217914	-0.000969523	0.0235711	-0.0114079	0.00958997	0
206	0.0117334	0.0739091	-0.00145669	-0.0206242	0.00387449	0.0154707	-0.00795201	0.0788398	0.00392429	0.0319937	0
206.2	0.00647518	0.0242846	-0.0130873	0.0170826	0.0359171	0.0103425	-0.0333958	0.0389583	-0.00581174	0.0322646	0
206.4	-0.00620904	-0.0241379	-0.0267733	-0.0100332	0.0276939	0.00876034	-0.00264628	-0.00149388	0.0175307	0.00674396	0
206.6	0.00751131	0.0244439	-0.000778122	-0.0153691	-0.0306697	0.00647914	0.0145995	0.0231176	0.0442698	-0.0133247	0
206.8	0.0207963	-0.0205209	-0.00802617	0.0260483	-0.0132749	0.00288789	-0.0881442	0.0327775	-0.00325813	0.0226752	0
207	-0.0160527	-0.00300149	0.0655305	-0.00695653	-0.00755032	-0.0317536	-0.00705586	0.0102552	0.0202025	0.0532776	0
207.2	-0.0397861	0.037532	0.0257406	-0.0582144	0.0113972	-0.0269363	-0.0109764	0.01541	-0.0178337	-0.00159804	0
207.4	0.00296945	-0.021953	-0.0251358	0.0239517	-0.00743618	-0.0234002	-0.000480836	-0.00967954	-0.0280247	0.00309065	0
207.6	0.00311494	-0.026913	0.0192864	0.0264265	-0.0317968	-0.021047	0.0180191	-0.00390196	-0.000129524	0.025766	0
207.8	-0.014718	-0.00974834	0.0283158	-0.0141321	-0.0131668	-0.0124035	0.0150105	-0.00860749	-0.0250982	-0.0181194	0
208	0.0167604	-0.030358	-0.023106	0.0256728	0.00648054	-0.00923305	0.0304753	-0.0588368	-0.0461388	-0.0618025	0
208.2	-0.0102353	0.062098	0.0233584	-0.0245143	-0.00800395	-0.00301757	0.0304683	-0.023771	0.0246324	-0.044182	0
208.4	-0.0508022	0.0278612	-0.00402828	0.0225063	0.0102354	-0.00311754	0.0224101	-0.00503849	-0.00778343	-0.0389867	0
208.6	0.00366628	0.0109899	0.0102112	-0.0208861	-0.0210866	0.00526495	0.0229863	-0.0430507	0.0433506	-0.0148928	0
208.8	0.0166589	-0.0414035	-0.0348642	0.0315112	-0.0200254	0.0212566	-0.0025595	-0.0404812	0.0256286	-0.0318541	0
209	-0.00673724	-0.0421692	-0.0349792	0.0958599	0.00479865	0.00473834	-0.0587099	-0.0465286	-0.0390849	-0.0392582	0
209.2	0.00313921	0.015576	0.0196853	0.0229662	0.0157325	-0.0220434	-0.0500205	-0.0547081	0.0146394	-0.0227304	0
209.4	0.00429114	0.00686136	-0.0137073	-0.0404963	0.0241769	-0.0112177	0.0241117	-0.000853277	0.0697033	-0.0254986	0
209.6	-0.00664602	0.033911	0.00565135	-0.0191669	-0.00443886	-0.00997744	0.00434107	0.00205102	-0.0293444	0.0236837	0
209.8	0.0213172	0.0578948	0.0390887	-0.028132	0.00548922	-0.0153025	0.0152819	0.0288062	0.0544419	0.0411882	0
210	0.0525628	-0.00590323	-0.0127908	-0.0143825	0.0408646	0.023009	0.012625	0.0609121	-0.0090708	0.0261392	0
210.2	0.0288417	-0.0269258	-0.0158135	0.00735369	0.0260676	0.00849782	0.00806705	0.0180184	-0.0540646	-0.000163313	0
210.4	-0.0125679	-0.00200083	0.027726	-0.0112942	-0.0016409	0.010571	0.0425703	-0.0322761	0.0209333	0.0506815	0
210.6	-0.0138974	0.0248209	-0.00648287	-0.0240371	0.00383233	0.0596036	0.0346531	0.0116841	0.0282351	0.0976947	0
210.8	0.00453136	0.0492612	-0.0558026	0.00711089	-0.00635664	0.033661	-0.0463331	0.0851889	-0.0333973	0.00433274	0
211	0.0121905	-0.0746803	0.00449719	-0.0033166	-0.0130408	0.0473874	0.000896199	0.0710067	-0.0370614	0.00504816	0
211.2	0.00314815	-0.035387	0.0403774	0.0333842	0.0240208	0.00040924	0.0300092	-0.00216367	-0.0326409	-0.00361123	0
211.4	-0.026353	-0.00440868	-0.00976966	-0.00487272	-0.00156451	0.00322288	-0.00309648	-0.00418508	-0.000176575	-0.0127096	0
211.6	-0.0371838	0.00427862	0.00279461	-0.0174106	-0.0420532	0.01073	-0.00526816	0.00647213	-0.00626879	-0.0264254	0
211.8	-0.0100381	0.00653256	0.0344727	0.0195262	-0.0273153	-0.0241356	-0.00247368	-0.00529402	-0.00992038	-0.0181276	0
212	0.0211403	-0.00414496	-0.0131189	0.00657955	-0.00690845	-0.0288174	-0.0231977	0.00174361	0.0430553	-0.00736636	0
212.2	0.0248613	0.0517792	-0.00256372	0.00754981	-0.0104635	0.00128916	0.0162628	-0.000803197	0.0365273	-0.0648578	0
212.4	0.0109132	-0.0447935	-0.0073953	-0.00762221	0.00634484	0.0246604	-0.0075286	0.0230892	0.0307861	-0.00598811	0
212.6	0.00718209	-0.0387207	0.0268703	-0.00122375	-0.0241021	0.0266731	0.0288906	-0.00464044	0.0121883	0.0199815	0
212.8	-0.0106245	-0.0254501	-8.72644e-05	-0.029304	-0.01119	-0.00503767	-0.0282287	-0.0312058	-0.0108235	0.0142398	0
213	-0.0187247	0.0026192	-0.0522007	-0.0304992	0.00880921	-0.00827794	-0.0420177	-0.00868922	-0.00587214	0.0281846	0
213.2	-0.00411868	0.0252332	-0.0466975	0.00255344	-0.0167303	-0.00455602	0.0404833	-0.0105069	-0.0104571	0.0149873	0
213.4	-0.00111312	-0.0453181	-0.0171662	-0.0135924	-0.0174036	-0.0397255	0.0175271	-0.0286347	-0.029163	-0.0334707	0
213.6	-0.000430891	-0.00052178	0.00626887	-0.000462427	0.00232757	-0.00666741	0.00259263	0.059413	0.0312729	-0.0106956	0
213.8	-0.000866027	0.0289483	-0.0377179	0.0090605	0.00832124	-0.0155829	-0.0411779	0.00190571	0.0129111	0.0215506	0
214	-0.0114895	0.0129963	0.0237286	-0.0264205	-0.00327789	-0.00906309	0.0137898	-0.0402775	-0.0069914	0.00278579	0
214.2	-0.000108527	0.021212	0.0577435	-0.00534251	0.021802	-0.00276022	0.0235373	0.0137193	-0.0137528	0.0232715	0
214.4	-0.00113273	0.0619644	0.0432833	0.0199532	0.0380085	0.0129565	-0.0285354	0.0106362	-0.02156	0.0572269	0
214.6	-0.0176682	0.0482859	0.044691	-0.00494684	0.00489742	0.0143877	-0.0123358	-0.0393868	-0.0104781	0.0185323	0
214.8	-0.00359232	-0.022196	-0.0112233	0.0151556	-0.0053198	-0.0459028	0.0152039	0.0218734	0.00777324	-0.0409464	0
215	-0.0443123	-0.000567992	-0.000241647	-0.00135378	-0.0075865	-0.0106487	-0.0191789	0.0106874	0.0111379	-0.0614996	0
215.2	-0.00969695	-0.0339408	0.0121642	0.0316132	-0.0248894	-0.0152358	-0.0561361	-0.0468999	0.0161227	0.00749085	0
215.4	-0.0126848	-0.05286	-0.0549285	0.0194323	0.00820202	-0.00328386	-0.056902	-0.0556715	-0.0286112	-0.0184225	0
215.6	-0.0182874	-0.0336249	-0.0415046	-0.0186756	0.0285008	0.0284164	-0.0101837	-0.0204835	-0.036281	0.00689275	0
215.8	0.0136228	-0.0207086	0.0223272	-0.00735754	0.00943509	0.0189291	0.0293103	0.0153901	-0.0300539	0.0360367	0
216	0.00513499	-0.0256538	-0.00693416	0.0154338	0.00442075	-0.0194191	0.0251291	0.0249867	-0.0624695	-0.0659283	0
216.2	-0.0153208	-0.0431265	0.000691636	0.000765159	-0.00236339	-0.0279588	0.0239676	-0.00533707	-0.00205004	-0.0183298	0
216.4	0.0140158	-0.02053	-0.0102477	-0.000712209	0.0227129	0.00745789	-0.0138595	-0.024069	0.0150245	-0.00339143	0
216.6	0.0316114	0.0267601	0.015274	-0.0090569	0.00104575	-0.00640484	-0.0213908	-0.0457245	0.0126784	-0.0586434	0
216.8	0.0162149	0.0336316	0.0387743	0.00978485	0.00348888	-0.0153526	0.0108746	-0.00882922	0.0355525	-0.0100273	0
217	0.0306454	0.019035	0.00861238	0.0212309	0.0245199	4.79758e-05	0.0289895	0.0389215	0.0704795	0.0696404	0
217.2	0.0515533	0.0321946	-0.025635	-0.00314482	0.0217503	-0.00909259	0.00126469	0.0320792	0.0405306	0.0405363	0
217.4	0.00216984	0.0366633	-0.0218381	-0.0109308	0.0141161	-0.024012	-0.0158795	0.0323869	-0.0362211	-0.00725071	0
217.6	-0.0294635	-0.0130593	-0.0399272	-0.00842429	-0.0242896	0.0126454	0.0388133	0.0660995	0.0103976	0.0091134	0
217.8	-0.00598875	-0.0188497	-0.0166525	-0.0245568	-0.0207957	0.0456973	0.0203962	0.0414252	0.0442052	0.0272478	0
218	-0.0272564	0.00872444	-0.0188458	0.00885208	-0.0182377	0.0369771	-0.0204119	0.00839484	-0.00421354	0.0139946	0
218.2	-0.0581246	0.0278253	-0.026696	-0.00560781	-0.0254979	0.0338456	-0.00334778	0.0128832	-0.00194138	-0.00138458	0
218.4	-0.0150714	0.0169062	0.00887121	-0.0311091	-0.0318296	0.0455009	0.0597057	0.0122844	0.0197605	0.0140375	0
218.6	0.0452338	0.000832611	0.0380338	0.00307074	-0.0109268	0.0263227	0.0716402	0.00526296	-0.0145512	0.0217998	0
218.8	0.0324629	0.0145527	0.0112836	-0.00155824	0.0383783	-0.0107647	-0.0138785	0.0136573	-0.00966207	-0.025399	0
219	0.0317671	0.0156657	0.0173306	0.031934	0.00245874	-0.0103011	-0.0480764	-0.0623349	-0.0230315	-0.0416813	0
219.2	0.00626847	0.016143	0.0412136	0.0296018	5.69475e-05	-0.0318202	0.0274449	-0.00224689	0.0216937	-0.00633266	0
219.4	0.0289341	-0.0167154	0.0197646	0.00359635	0.00891985	0.0169106	0.0369962	-0.0279611	0.0535224	0.020348	0
219.6	0.0352672	-0.016185	-0.0183734	-0.025385	-0.00896837	0.0262349	0.0204104	-0.00388789	0.0123493	0.0093654	0
219.8	0.00210147	0.0243666	0.00788023	-0.0125804	-0.0136359	-0.0170088	-0.00117232	0.113277	-0.0341045	-0.0118227	0
220	0.00547922	0.0011192	0.0608244	0.0307522	0.00174491	-0.00115281	-0.0555633	0.0673003	-0.0142546	-0.00270091	0
220.2	-0.0036616	-0.044098	0.0217945	-0.0144609	-0.0103534	-0.0244196	0.0097695	-0.0174569	0.00934281	0.040461	0
220.4	-0.0115876	0.0375334	-0.0109395	-0.0423855	0.0133666	0.00634175	0.0268478	-0.0130363	-0.0308912	0.0528874	0
220.6	0.00470161	0.0178091	-0.0452134	0.0190486	-0.0020961	0.0152241	-0.00555353	-0.0240671	0.0208209	0.000523497	0
220.8	-0.0329472	-0.027267	-0.00776483	-0.00855044	-0.0264891	0.00690984	-0.00960506	-0.00862131	0.00231477	-0.0328583	0
221	-0.044292	-0.0300835	0.0096426	-0.025821	-0.021375	-0.00705238	-0.0219344	0.00325001	-0.0617268	-0.0350714	0
221.2	-0.00882877	-0.0275077	-0.0371631	0.017838	0.00875813	-0.0202387	-0.0380752	-0.0349991	-0.0286015	-0.0406469	0
221.4	-0.0315141	-0.000720652	-0.0175493	-0.0279751	0.0357579	-0.0157272	-0.00436995	-0.0449717	0.0137364	-0.0212218	0
221.6	0.0100448	0.000427995	-0.00384232	0.0359893	0.00283049	-0.0350038	-0.0350708	-0.0399822	0.00939671	0.0135061	0
221.8	-0.00377864	-0.0286975	0.00178282	-0.00103458	0.000696336	-0.0154631	-0.0357369	-0.0759356	-0.0186033	-0.0109754	0
222	-0.00910121	0.0276345	0.0070109	0.0394511	0.0229457	-0.0140239	-0.0377793	-0.0750044	-0.0288543	0.016314	0
222.2	0.0270879	0.0245248	0.0186498	0.0447961	0.00590803	-0.0140787	-0.0320648	-0.0334313	-0.00666589	0.0252188	0
222.4	0.0170356	-0.0102563	0.00414655	-0.0358616	-0.0260648	0.0225664	0.000150936	-0.0155554	0.0112403	-0.0216928	0
222.6	-0.0246399	0.0223454	-0.0149639	-0.0412941	0.00195633	0.0163919	0.00767992	-0.017383	0.0108625	-0.0200219	0
222.8	0.00351632	-0.0182845	0.0113441	-0.008034	0.0475973	-0.0692311	-0.0163537	0.000993363	0.0175589	0.0292311	0
223	-0.0255443	0.00563335	-0.0356524	-0.00229574	-0.00341012	-0.0293732	0.0297581	-0.00361938	-0.0031472	0.0324739	0
223.2	0.0272685	-0.0162676	0.0225523	0.0333032	-0.00086743	0.00617737	0.0286838	0.062594	0.0433372	0.0333336	0
223.4	-0.00377377	-0.00739391	0.0295517	0.0185176	-0.000838259	0.0203038	0.0159144	0.0603308	0.0472267	-0.00490864	0
223.6	-0.0381396	0.0170422	0.0213956	-0.0315388	-0.0175172	0.0096287	0.0208074	0.0119355	0.00956542	-0.0295768	0
223.8	0.0132559	0.00471738	0.0454404	-0.000880273	-0.0056542	0.00398744	0.0220064	0.0226035	-0.005519	-0.0138566	0
224	0.0161206	-0.0049552	-0.00839007	0.0651974	0.00961128	0.0417086	0.0106353	0.0597788	0.00018151	-0.0296337	0
224.2	-0.000421657	-0.0214802	-0.027343	0.00730115	0.0087863	0.0426375	-0.012299	0.0700369	0.0355706	-0.0403926	0
224.4	-0.0206857	-0.0264029	0.0327973	-0.00665628	0.00205986	0.0387092	0.011123	0.00933972	-0.00480642	0.0316238	0
224.6	0.0109317	-0.00786545	0.00900473	0.0316497	-0.0305249	0.0179061	-0.00105684	0.0156883	-0.0383619	0.039923	0
224.8	0.0118162	0.0137559	-0.0165256	-0.0110319	-0.0410734	0.0159368	0.0118036	-0.0123144	-0.0306086	0.0294172	0
225	0.00597154	0.00409724	-0.0214961	-0.0446897	-0.0110229	0.00432914	0.016599	-0.0361978	-0.00326363	0.0223168	0
225.2	0.0274596	-0.0113979	-0.041379	0.00338613	0.0118325	-0.0260107	0.00171051	0.0192101	0.0218474	0.00497973	0
225.4	0.00483269	0.00815601	-0.0176269	0.000376557	0.0119741	-0.0141525	0.0332339	0.00613952	0.0124212	0.0206498	0
225.6	0.0133775	0.0118307	-0.0203636	0.00916002	0.0298869	-0.0174655	-0.0481052	-0.0556981	-0.026547	-0.00915224	0
225.8	0.00845867	0.042684	-0.0149285	0.0260445	0.0180454	-0.0230627	-0.032327	-0.0214173	0.0159731	-0.0324431	0
226	0.00258873	-0.0203683	0.027018	0.038517	-0.0229483	-0.0253096	0.0246758	0.0325233	-0.0207985	-0.0278443	0
226.2	0.0126432	-0.00517818	0.0332292	-0.00460639	-0.0340055	0.0136161	0.0154185	0.00905505	-0.0284627	-0.0090982	0
226.4	0.0170794	0.0370465	0.00830397	-0.0177426	0.00602496	0.0373729	-0.0142035	0.00304294	0.0193696	-0.0299606	0
226.6	-0.00552262	-0.0407575	0.00281476	0.0348213	0.0437872	-0.00501725	-0.0038874	0.0568653	-0.000486479	-0.0591741	0
226.8	-0.0284617	-0.00213265	-0.019711	-0.0158202	0.0227384	-0.0126594	-0.0109554	0.0165858	-0.000368493	-0.0090399	0
227	-0.00556227	0.0154271	-0.0108729	-0.0456535	-0.0357683	0.00405337	-0.0326262	-0.0228602	-0.0139106	-0.0325147	0
227.2	-0.00161313	0.0347153	-0.01456	-0.0193043	-0.0435822	0.0125729	0.0525238	-0.0298924	0.000863493	0.00371344	0
227.4	-0.0291466	-0.00368687	-0.00732027	-0.00953377	0.0112891	0.000373573	0.0508316	-0.000108875	0.0142746	0.0105373	0
227.6	-0.0246181	-0.0407194	0.00101879	-0.010563	0.0260272	-0.00391117	-0.00427616	-0.0292314	-0.00204336	0.00560721	0
227.8	0.00425059	0.0313866	-0.0167241	-0.0130208	-0.00847201	0.00639627	-0.00816165	-0.0668202	-0.0277809	0.0289172	0
228	-0.00520152	0.088002	-0.0286929	-0.0359332	0.000899879	-0.00601033	-0.0224044	-0.0114713	-0.0345021	0.0208372	0
228.2	-0.00643875	-0.0365596	-0.00457332	-0.0167971	0.0163302	-0.0328396	0.0101529	-0.0401361	-0.0225469	0.0457691	0
228.4	0.0229849	-0.0325755	0.0264133	0.00375841	0.00556179	-0.00875482	0.0214296	-0.0391168	-0.0214168	0.0266344	0
228.6	0.00744923	-0.0498597	0.0396935	0.0114499	0.00609252	-0.00800329	0.0311995	-0.00717882	0.0276438	-0.00695876	0
228.8	0.00644375	-0.0444174	0.0274175	-0.0117467	0.000875983	0.00681173	-0.00222405	0.00843549	0.00542005	0.00567673	0
229	0.0265891	-0.0109572	-0.00334377	-0.0211989	0.0118835	0.016441	-0.029029	0.0194045	-0.0357724	0.0178449	0
229.2	0.0137857	-0.00256172	-0.0129278	-0.00127254	0.0211807	-0.00497392	-0.00513124	0.0449572	0.0237233	0.00581141	0
229.4	0.00116674	0.0315454	0.0135496	-0.00986897	-0.030017	0.00876845	-0.0197455	0.0505012	0.0655761	0.0269533	0
229.6	-0.00850267	-0.0303524	-0.00762351	-0.00661017	-0.0117288	-0.0094088	-0.0356287	0.0102169	0.0426691	0.0109902	0
229.8	-0.0507155	0.00602534	-0.0403366	-0.0244169	-0.000503503	-0.00132251	-0.0122066	-0.0457692	0.00324295	-0.0177814	0
230	-0.0434302	0.0213822	-0.00893546	0.0083002	0.0104599	-0.00778286	-0.0378559	-0.0215389	-0.0179166	-0.0104731	0
230.2	-0.0311755	0.0300983	0.0272767	0.0450515	0.00280237	-0.0221734	-0.0497352	-0.0235635	-0.0190676	-0.0117912	0
230.4	-0.0319022	0.0378545	0.0109174	0.00778143	-0.00865719	-0.0190198	-0.043693	-0.0378113	0.0331885	-0.0431257	0
230.6	0.00866136	-0.0158323	-0.0163461	-0.0232471	-0.00257765	-0.0202586	-0.0303889	0.00895217	0.0673966	-0.038783	0
230.8	0.0262336	-0.000882249	-0.0191305	0.0348459	-0.0337785	-0.0296111	0.0821143	-0.0383149	-0.05449	0.00730213	0
231	0.00133831	0.0486574	0.00951068	0.0255991	-0.0237563	-0.0249474	-0.011099	-0.0293329	-0.0729818	-0.00825987	0
231.2	-0.00528467	0.00455809	0.0530755	0.0609061	-0.0255172	-0.00448481	-0.0549343	0.0125899	-0.0486991	-0.0060691	0
231.4	0.00522649	-0.0291943	0.0436623	0.0156681	0.00716169	0.00147614	0.0415807	0.0367142	-0.0239213	-0.00089747	0
231.6	0.013923	-0.0202401	-0.00809622	-0.000260821	0.0370794	0.0284163	0.0889046	0.0195852	0.0209335	0.0185344	0
231.8	0.0231317	-0.0320936	0.011482	0.0537476	0.0241173	0.0507254	0.0288747	-0.00123032	0.0647573	0.0178956	0
232	0.0259427	-0.033355	0.0797958	-0.0201816	0.0116602	0.0231706	0.00784595	0.058259	0.0581134	-0.0257469	0
232.2	0.0181716	0.0197643	-0.00143339	-0.0347905	-0.0297665	0.0641018	0.0415413	0.144654	0.0177966	0.0498352	0
232.4	0.0524143	0.0568971	-0.0219373	0.0037757	-0.00577717	0.0448367	0.0754491	0.019932	0.032355	0.0352946	0
232.6	0.0287263	-0.00308882	-0.0241432	0.0323531	0.0215834	0.0104725	0.0370628	0.032422	-0.00195992	0.0260757	0
232.8	-0.00936891	0.0121036	-0.0371135	0.0053367	0.021727	0.0131821	0.0186496	0.0283924	-0.0128077	0.0169513	0
233	-0.014653	0.0247779	-0.0379881	-0.0413656	-0.00133922	0.0391354	0.0209077	-0.0345503	-0.0116896	-0.0260594	0
233.2	0.0056661	-0.0300719	-0.0262683	-0.034504	-0.0141102	0.0201509	-0.0158059	-0.00777388	-0.0347412	-0.0375723	0
233.4	0.0465283	0.0550951	-0.00295593	-0.000372613	0.0158098	-0.0581277	-0.0422702	-0.0474939	0.0124222	-0.0121639	0
233.6	-0.000379495	-0.00503008	0.0143763	-0.0296158	-0.00397294	-0.0308128	-0.0858817	-0.0364238	-0.031839	-0.0240776	0
233.8	-0.00196931	0.0054179	0.0209579	0.0254014	0.00496634	0.0182944	-0.00649215	-0.045591	-0.0469957	-0.00907917	0
234	0.00608273	-0.0271766	-0.00965034	0.0119759	0.00266243	-0.0228153	-0.00879091	-0.0161585	0.0105615	0.0302231	0
234.2	-0.0434426	-0.0400226	-0.0430908	-0.00992355	-0.00377547	-0.0162049	-0.0297522	-0.00306917	0.0438115	0.0128077	0
234.4	-0.0755108	0.0323113	-0.0166969	0.00184268	-0.00894441	0.0287316	0.00295621	-0.0101888	-0.00433218	-0.014622	0
234.6	-0.0308669	0.0260017	0.0295872	-0.0206098	-0.0149297	-0.0168504	-0.00762595	0.0268348	-0.0377726	0.00565903	0
234.8	-0.0155202	-0.0516522	-0.00122152	0.0364282	0.0307162	-0.00336359	0.015473	0.00911059	0.0253827	-0.022481	0
235	-0.0308452	-0.0459667	-0.0127636	-0.033382	-0.0169903	-0.00786775	-0.0397715	0.00743956	0.0142732	0.0308788	0
235.2	-0.0293688	0.0201562	-0.0131902	-0.03885	-0.0359983	0.0112717	-0.0172667	-0.0278566	0.00294003	-0.00813649	0
235.4	-0.0102939	-0.00689071	-0.0287661	0.00494496	-0.0179036	-0.035319	0.0374786	-0.00583451	-0.00650632	-0.0616482	0
235.6	0.00949485	-0.0362866	-0.0355913	0.0241079	0.00548582	-0.0378034	0.0106772	-0.00688996	-0.0387154	-0.0206343	0
235.8	0.0255159	-0.000174565	0.0103124	0.0166147	0.0149575	0.0228936	-0.0388956	-0.0483379	-0.0154208	0.0378128	0
236	0.0222057	-0.0278365	0.0811305	-0.0248927	-0.00862711	-0.0317381	-0.0110135	0.0280321	0.065989	0.0298433	0
236.2	-0.0119504	-0.0261167	0.0647609	-0.0376197	0.000688431	-0.00490453	0.0276848	0.0419428	0.0195965	-0.00670238	0
236.4	0.0064003	-0.0186447	-0.0131501	0.00913022	0.00498131	-0.000633837	0.0408142	-0.00124252	-0.0104371	-0.0542048	0
236.6	0.0255167	0.0166487	-0.0436531	-0.00512252	-0.00750332	-0.0154224	-0.018314	-0.0229002	-0.0421591	-0.0264095	0
236.8	0.012908	0.0319429	0.0080537	-0.0106746	-0.00836379	-0.0238573	-0.0365159	-0.00158087	-0.0146542	0.0211436	0
237	0.00510511	0.0139004	0.039993	0.0200717	0.00355395	0.00244519	-0.0143725	0.0119737	0.0261473	0.026108	0
237.2	0.0065547	0.000463916	-0.00307368	0.0105237	0.00947418	0.0266741	-0.0307178	0.00732872	-0.000816503	0.00814303	0
237.4	-0.0112053	-0.0119978	-0.0197369	0.00185922	0.00995899	-0.0142737	-0.00508742	0.0402755	0.00841016	-0.0104604	0
237.6	0.00680029	0.0065673	-0.00275143	0.00581669	-0.00404346	0.0324755	0.0278971	0.0614783	0.00132196	0.0250873	0
237.8	0.0134586	0.00463017	-0.0106091	0.0111766	0.00212492	0.0148756	0.00973305	0.0221377	0.0236736	0.053432	0
238	-0.00342523	-0.00268596	0.00858188	0.0265727	0.020695	0.00722804	0.00113831	-0.0187973	-0.000238479	-0.000223157	0
238.2	0.00941914	0.020708	-0.0173051	-0.00720127	0.00405164	0.0206142	-0.0143184	-0.0573657	-0.0435012	-0.0195929	0
238.4	0.0350986	0.0396365	-0.0471376	-0.0454687	0.00190845	0.0193209	-0.0323775	-0.0543282	-0.0353015	0.0257071	0
238.6	0.00388504	0.0167706	0.00759574	-0.00402666	0.0395952	0.0265966	-0.00785608	0.011704	0.0124793	0.0198423	0
238.8	-0.0302495	0.00401187	-0.0364615	0.00231878	-0.0109694	-0.00738083	-0.00333416	-0.0151287	0.062071	0.0142698	0
239	0.0104153	-0.00689135	0.0100889	0.0232834	0.000286788	-0.0214151	0.0498827	-0.0502111	-0.00769184	0.00151457	0
239.2	0.0103581	-0.00388715	0.0308794	0.0188239	-0.0179622	-0.0213249	0.010838	-0.0176322	-0.0170242	-0.0232359	0
239.4	0.00613364	0.03139	-0.0149243	-0.0105078	-0.0290284	-0.0133789	-0.0367782	0.0137071	0.0467651	-0.0535758	0
239.6	0.0194784	0.0356674	-0.00368116	-0.0180505	0.0136597	-0.00569572	0.0166779	0.00556576	0.0560814	-0.0406434	0
239.8	-0.00285513	-0.0151244	0.02911	-0.00853953	0.0298665	-0.00208528	0.0725026	0.000816506	0.00318667	0.018138	0
240	-0.0184347	-0.0263123	-0.0173612	-0.00924364	-0.0112937	0.00725989	0.0389049	0.0166687	-0.0107689	0.0217609	0
240.2	0.0294482	0.000828833	0.0584114	0.0257946	-0.00401622	0.00166381	0.0376186	0.0262901	0.00742922	-0.0512973	0
240.4	-0.00953664	-0.0366616	0.011649	0.0445956	0.00151705	-0.0255583	0.019154	0.00615649	-0.00593308	-0.0201429	0
240.6	-0.00193668	0.00239931	0.0372317	0.0158388	0.00894549	0.0186178	-0.0236631	0.00264068	-0.0220437	0.0302764	0
240.8	0.0119575	0.0596643	0.0334852	0.0168289	0.0163654	0.0190929	-0.0597392	0.0294151	-0.01735	0.00754684	0
241	-0.0178093	0.0276125	0.00264064	0.0217134	0.00826543	-0.0187995	-0.0335202	0.0399245	-0.0144721	-0.024314	0
241.2	-0.00396503	-0.0180327	0.0581093	-0.0135063	-0.00422073	0.0154578	0.0115259	0.0152502	-0.00852238	0.0172429	0
241.4	0.0300553	-0.0111736	-0.0208271	0.00708984	-0.00661953	0.00333233	-0.0428787	-0.00680512	0.0185135	0.0749474	0
241.6	0.0287678	-0.0111638	-0.00628881	-0.0167137	-0.013382	-0.0178725	-0.0328298	-0.0300676	-0.0109092	0.036395	0
241.8	0.00527876	0.00169348	-0.0285784	-0.0128023	-0.00851037	-0.00763056	0.0502903	-0.0171092	0.0047521	-0.000725322	0
242	-0.0157362	-0.0289244	-0.014444	-0.0266537	-0.00335157	-0.00469792	0.00187691	-0.0468569	-0.0620614	-0.0187076	0
242.2	-0.0145307	-0.0249318	0.0177368	-0.0188393	-0.00362502	-0.0171632	-0.0467031	-0.0251111	-0.0572744	-0.0201428	0
242.4	-0.0137453	0.0245579	-0.0134236	0.0224464	-0.0068929	-0.0224864	0.0127002	0.0274858	0.052939	-0.0248563	0
242.6	-0.0365194	-0.0131082	-0.0231883	0.00272431	-0.0128223	-0.0233279	0.00997506	-0.0320491	0.00126207	-0.0594367	0
242.8	-0.0326826	-0.0519058	0.0161226	-0.023702	-0.00907781	-0.024042	0.0114503	-0.00683189	-0.0463666	-0.0542972	0
243	-0.0191316	-0.000175075	-0.0356559	-0.0300572	-0.00557883	-0.0199385	0.039958	-0.00214739	0.00922064	-0.00593443	0
243.2	-0.0130238	0.0402122	-0.0349321	0.0404284	-0.0085756	0.0087208	0.00980007	-0.0334852	-0.000945364	0.0132766	0
243.4	0.00316897	0.0344555	-0.0306314	0.0142776	-0.00903512	0.00302112	0.0227587	-0.0142322	-0.0444592	-0.0114115	0
243.6	0.0112461	0.0314354	-0.0484039	-0.016365	0.00863238	-0.0121858	0.00930885	-0.00163272	-0.00530961	-0.0200971	0
243.8	0.000104616	0.00805625	-0.0228019	0.0406911	0.0343012	0.00353354	-0.0610487	-0.0306065	0.0682549	0.0121629	0
244	-0.00151507	-0.0422934	0.00478144	-0.0354104	0.034119	-0.00616725	0.00188099	0.0065712	0.0616425	0.0414975	0
244.2	-0.0203369	0.0320444	0.0365923	-0.0442368	0.0094218	0.00740813	-0.0101011	0.0168475	0.0112791	0.056238	0
244.4	0.00642626	-0.0279786	0.0583296	0.0107816	-0.00938827	0.049738	0.01664	0.045725	-0.0052902	0.0275225	0
244.6	0.0045086	-0.0545073	0.0171325	0.0357018	-0.00518042	0.0635875	0.00837343	0.0550998	-0.0199256	0.0134342	0
244.8	-0.0233944	-0.0192403	-0.001036	0.0168218	9.19859e-05	0.0294447	0.0185972	-0.00845903	-0.00992977	-0.00903411	0
245	-0.01435	-0.023934	0.0138272	0.0134574	-0.0122209	0.00205247	0.0367693	0.0126609	0.03255	-0.0125837	0
245.2	0.0238161	-0.0176648	-0.00761843	0.0168114	-0.0165022	0.0267157	-0.016725	0.114812	0.0380552	0.0335063	0
245.4	0.0360257	0.0302073	-0.00565152	-0.0284542	0.000147708	0.0554104	-0.00155222	-0.00421398	0.00310288	0.00737536	0
245.6	-0.00513051	0.0174096	-0.0475082	0.000576505	-0.0313738	0.0263312	0.0128049	0.031082	0.011678	-0.0103175	0
245.8	-0.0125745	-0.0470454	-0.0388729	-0.0331711	-0.0279533	0.00344438	0.0279819	-0.00530606	0.0203259	-0.00343349	0
246	-0.00782764	-0.0329114	0.0110609	-0.0693499	0.0088465	-0.0117272	-0.00580352	-0.022519	-0.0042746	-0.000480682	0
246.2	-0.0190972	-0.00461658	0.000134692	-0.0358297	0.000752854	-0.0039214	0.00436339	-0.0102439	-0.021758	-0.00379765	0
246.4	0.0142421	-0.00225382	-0.0277727	0.0118332	-0.0208385	0.0115778	0.0406969	-0.0279867	0.00203824	-0.0200886	0
246.6	0.0732934	0.0631162	0.023323	0.0305409	0.0239071	-0.0129739	-0.0230434	0.0141677	0.0209754	-0.0362416	0
246.8	-0.00399995	0.0516345	0.0235575	0.0405507	0.0443686	-0.00737216	0.0200127	0.000629522	-0.0217521	0.0198009	0
247	-0.0231799	-0.000263439	0.0399976	0.0379589	0.0257304	0.00613923	0.011294	-0.0235698	-0.0440522	0.0241863	0

## Sheet: fly3
Time	gamma-L5	gamma-L4	gamma-L3	gamma-L2	alpha-L	gamma-R5	gamma-R4	gamma-R3	gamma-R2	alpha-R	stimulus			Time	gamma-5	gamma-4	gamma-3	gamma-2	alpha	stimulus
0											0			0	0.00170755	-0.0086315	0.000257838	0.00072143	0.00999617	0
0.2											0			0.2	0.0045898	-0.0208462	0.0226519	-0.0075323	0.00942206	0
0.4											0			0.4	-0.00765934	-0.0109137	0.00036641	-0.0151605	0.00327481	0
0.6											0			0.6	-0.00847372	-0.00648313	-0.0115963	0.0216913	0.00366594	0
0.8											0			0.8	0.00678994	-0.00130559	0.00177228	0.0183822	0.00154178	0
1											0			1	-0.00162477	0.0197409	-0.0016189	0.0103463	0.0130585	0
1.2											0			1.2	-0.00920614	0.0191855	0.011544	-0.00383823	0.00241497	0
1.4											0			1.4	0.000975912	0.0204317	0.011695	-0.00681224	-0.0152032	0
1.6											0			1.6	0.00911085	0.000227319	-0.0109745	0.00263769	-0.0114083	0
1.8											0			1.8	0.00769703	-0.0129068	-0.0124312	-0.0158767	-0.00780064	0
2											0			2	0.0102925	0.0105584	-0.00377271	0.0111538	0.016672	0
2.2	-0.0327042	-0.0342259	0.0243203	0.0152634	-0.0178103	0.0169428	-0.0365856	0.007987	-0.0154258	-0.0155707	0			2.2	-0.00480256	0.0102143	0.00570466	0.0219423	0.0135233	0
2.4	-0.0159035	-0.00943055	0.00387913	-0.00444024	-0.0181416	0.0353462	-0.0243573	-0.00308434	0.00934631	-0.0189393	0			2.4	0.0017497	-0.0063733	-0.000306166	-0.0138719	-0.0058182	0
2.6	0.0310998	0.0221153	-0.025751	0.0102297	0.0163038	-0.0162071	-0.0186884	0.000327524	9.58837e-05	0.0178153	0			2.6	0.000794662	-0.0128982	-0.00795664	-0.025496	-0.0154226	0
2.8	-0.0178568	0.0192021	0.00944009	0.0251112	0.00115905	-0.041171	0.0123509	-0.045798	0.00981262	0.00471375	0			2.8	-0.0157302	-0.021149	-0.0125557	-0.0190949	-0.00757095	0
3	-0.0090373	0.00653084	0.0104956	-0.0163949	-0.0497511	-0.0378059	0.00589084	0.015993	0.0161911	-0.00839769	0			3	-0.0109286	-0.00715198	-0.0104506	-0.00919791	-0.00598238	0
3.2	-0.000982087	-0.00973227	-0.0185318	-0.0176216	-0.0122752	-0.0117399	0.0295364	-0.00415257	0.0264061	-0.0358327	0			3.2	-0.00381811	0.000129739	0.00435946	0.0172484	-0.00632732	0
3.4	-0.0148904	-0.0177143	-0.0268246	-0.00773798	0.0271103	0.00540885	0.00139527	-0.0230961	0.000633469	-0.0210269	0			3.4	0.0135423	-0.00306533	-0.00611373	0.00445346	-0.00500608	0
3.6	-0.0121842	-0.00156982	0.0110183	-0.0245042	0.00267132	0.0128663	-0.0271714	0.00818433	-0.0284519	0.0245555	0			3.6	-0.00257521	-0.0184547	0.0052685	-0.00716414	0.00279902	0
3.8	-0.00743021	0.00356666	0.0364479	-0.0156797	-0.00881526	0.0086246	0.0406729	-0.00659171	-0.00722699	0.032343	0			3.8	-0.0127762	0.00595799	0.0107622	-0.00792231	-0.00350389	0
4	-0.0181849	-0.0317328	-0.0117841	0.0133795	0.00382215	-0.0147674	0.0376983	0.00628565	0.00766551	0.0255977	0			4	-0.00151759	0.0153424	0.00599763	0.0170685	0.0044985	0
4.2	0.000918764	-0.0137918	-0.00693798	-0.00293764	-0.0104073	0.0353595	-0.0367318	0.0128314	0.0155875	-0.00422898	0			4.2	0.0115027	-0.0194164	0.0048479	0.00807764	0.0236357	0
4.4	0.000484473	-0.0347382	0.0191242	-0.00914396	-0.0429072	0.00597424	-0.0188386	-0.0156806	0.0221209	-0.0240362	0			4.4	0.00768974	-0.00156075	-0.00595816	0.00780992	0.00535842	0
4.6	0.0216679	-0.0217579	0.0112466	-0.0227778	0.0112537	-0.0277956	0.00504794	0.0438425	0.00664875	-0.0228562	0			4.6	-0.00402337	0.0102476	-0.0105945	-0.0134295	0.00314685	0
4.8	0.0419832	0.0139762	0.00723011	-0.00806966	0.0302873	0.0028601	-0.00250775	0.0419923	-0.00652	0.000228915	0			4.8	-0.00636059	0.00404199	-0.00672625	-0.0131354	0.00882101	0
5	0.0120728	0.00878972	0.00325634	0.0196518	-0.0206772	0.0333249	-0.0107906	-0.0338435	0.00143765	0.0165625	0			5	-0.00835386	0.0140028	0.00744193	-0.0158319	0.00100786	0
5.2	-0.0118706	-0.00113126	-0.0328702	0.00461105	-0.00213232	0.00974105	-0.00540482	0.0400081	0.0075683	0.000497822	0			5.2	0.00288085	0.00950598	0.00292688	-0.00697641	-0.00162971	0
5.4	0.0191371	0.0106505	-0.0197697	0.0211177	0.00832209	-0.0194266	0.0416204	0.092127	0.0130668	-0.0176574	0			5.4	-0.0072585	-0.016413	0.00267667	0.0157625	0.00372207	0
5.6	-0.0177089	0.0158404	0.00577814	0.00675218	0.027958	0.0235521	-0.0193192	-0.0428054	0.0220762	-0.0398619	0			5.6	-0.0110665	-0.00851191	0.00449312	0.0161042	0.0150193	0
5.8	-0.0222792	0.000829972	0.000580805	0.0126143	0.00741918	0.00979047	0.00883014	-0.0408436	0.00483366	0.0210745	0			5.8	0.0174984	0.0109383	0.0023592	0.0169787	-0.00735337	0
6	0.0250433	0.00253304	0.0175787	0.0161475	0.0216465	-0.0195604	0.0201761	-0.0105646	-0.00906175	0.0416949	0			6	0.0241474	0.00422364	0.00559209	0.0133761	-0.00747328	0
6.2	0.0104151	0.00410745	0.0116872	-0.00448451	0.03892	-0.0102547	-0.00681363	-0.0555418	-0.0308185	-0.0137128	0			6.2	0.00310443	0.0241528	0.00180481	0.0033865	-0.00566879	0
6.4	-0.0426088	-0.00804014	-0.0255868	-0.02301	-0.0205113	0.00291596	0.0232658	-0.0458957	-0.0481078	-0.0268175	0			6.4	-0.0128349	0.00707058	-0.00252924	-0.0208986	-0.0133708	0
6.6	-0.0123861	0.0106518	0.00139385	-0.0176758	-0.0706339	0.0108108	0.0137232	0.011681	0.00430758	0.016169	0			6.6	0.00698459	-0.0215055	0.0272886	-0.00153826	-0.00086053	0
6.8	-0.0186461	0.024328	-0.0148845	0.0215898	-0.0466135	0.00551	-0.044979	0.0025108	0.0416138	0.0266751	0			6.8	0.0232097	0.000614928	0.0239193	-0.00289486	-0.000836048	0
7	-0.0188018	-0.00546027	-0.0311261	0.0157105	-0.0185392	-0.0458871	-0.036135	-0.0374333	0.0062929	-0.00522945	0			7	0.0155803	0.0207671	-0.0117108	0.00324088	0.00317348	0
7.2	-0.00809939	-0.010841	-0.00248727	-0.00745077	0.00867889	0.00450113	-0.00328161	-0.0265654	-0.00663289	-0.000772187	0			7.2	-0.00677319	0.00910438	-0.00936482	-0.000432464	0.00864483	0
7.4	0.0110577	0.022939	0.0151291	-0.0051937	0.0199072	0.0250422	0.0243409	0.00941847	0.0274773	0.0115088	0			7.4	0.0123082	0.0124027	0.00508055	-0.00640035	0.00744509	0
7.6	0.0162967	0.0247404	0.00765305	0.0166951	0.0217092	-0.0158434	0.00948206	0.0211374	0.0346613	0.0168597	0			7.6	0.032722	0.0125001	0.0201347	0.0194895	0.0193523	0
7.8	0.00915492	-0.0135598	0.00648263	0.0154092	0.0184602	0.00972084	-0.0360683	0.0270214	-0.0188568	0.0258649	0			7.8	0.0178645	-0.00161458	0.000721708	0.0256029	0.00789456	0
8	0.0332811	-0.00912996	-0.00635311	-0.0149961	-0.0151416	0.00694691	-0.00254188	0.0407976	-0.0535686	-0.0171377	0			8	0.0137535	0.00405146	0.00883852	0.0182525	0.0128227	0
8.2	0.0207382	0.000195239	0.0114963	0.0125486	0.00827209	0.00780475	0.024264	0.0121482	0.00356492	-0.0271222	0			8.2	0.0192164	0.0163966	0.0342558	0.0171409	0.0329953	0
8.4	0.0281362	-0.00905363	0.00502017	-0.0071691	0.0100937	-0.0132032	0.0526799	-5.15656e-05	-0.0217017	0.0381482	0			8.4	0.0485881	0.0263086	0.0150583	0.0418562	0.0218959	0
8.6	0.00763403	-0.0105866	0.00797487	-0.00115878	-0.00965068	-0.00700626	-0.0126435	-0.00337166	0.00792671	-0.0086742	0			8.6	0.0198645	0.0260688	0.0481626	0.0110231	0.0345068	0
8.8	-0.0180802	0.00866649	0.0232588	0.0165427	0.0181956	0.0217656	-0.0505685	0.00262392	0.0306218	-0.0507295	0			8.8	0.00748409	0.0068234	0.0419615	0.0202577	0.0268186	0
9	-0.0136626	0.0277518	0.0147372	-0.00717539	0.0268202	0.0103875	0.0189665	0.00986318	0.00952278	0.00712589	0			9	0.0141753	0.00667823	0.0223488	0.0276864	0.0165561	0
9.2	-0.0152909	0.00800491	0.0031931	-0.0108649	-0.0291777	-0.0206172	0.0296157	0.00151282	0.0522593	-0.0157226	0			9.2	0.0170067	0.0357076	0.0280373	0.0127979	0.040973	0
9.4	0.00509252	-0.0343805	0.0172215	0.00369718	0.024393	0.0067334	-0.0205276	0.0228728	-0.0317106	-0.0540671	0			9.4	0.0403973	0.0216135	0.0249258	0.0259982	0.0278384	0
9.6	0.0211323	0.0423691	0.00184103	-0.000573466	-0.00428547	0.0130153	-0.024933	0.0117671	-0.0261647	-0.0219566	0			9.6	0.0391308	0.0272762	0.04097	0.0138526	0.0285996	0
9.8	-0.0061781	-0.00884135	0.00209205	0.0324356	-0.0376012	-0.00701175	-0.0270006	-0.0240151	0.0156444	0.00824389	0			9.8	0.0363497	0.0302897	0.019005	0.000788089	0.034817	0
10	-0.0259807	-0.0314958	-0.0106968	0.0381324	-0.020845	-0.0122958	0.0606477	-0.0355739	0.0313683	0.055606	0			10	0.0425614	0.0391796	0.0299531	0.016503	0.0276746	1
10.2	-0.00849821	0.0114328	-0.0474134	0.00117824	-0.00119954	0.00318316	0.0832106	-0.000507954	0.0314834	0.0553426	0			10.2	0.0954285	0.096679	0.095108	0.0689154	0.0567341	1
10.4	0.0108791	-0.0177215	-0.0272124	-0.0199675	-0.00264153	0.0127033	-0.0214099	0.0165498	0.000351174	-0.00278307	0			10.4	0.126658	0.1397	0.118064	0.0804576	0.0771167	1
10.6	0.00309458	-0.00286443	0.0441478	-0.0178078	0.000640842	0.00530829	0.0211927	-0.0254014	-0.0647049	0.03015	0			10.6	0.152332	0.14463	0.0858918	0.0679999	0.0556568	1
10.8	-0.0241283	0.0291411	0.00600829	0.0183001	0.019094	-0.00250057	0.00955224	0.00681351	-0.0663252	0.0233279	0			10.8	0.13145	0.124183	0.101212	0.0905919	0.0424257	1
11	0.0044346	0.00109747	0.00257662	-0.0296294	0.0396242	0.00726963	-0.00614205	0.0183485	-0.0126797	-0.0558988	0			11	0.0895818	0.107987	0.0655034	0.0728546	0.0440316	1
11.2	0.0177316	-0.0153732	-0.0225039	-0.0174072	0.00789001	0.0178539	0.00990465	0.0313859	0.0121495	-0.030193	0			11.2	0.0878285	0.0767651	0.0514951	0.0388	0.0319107	1
11.4	0.0166333	-0.0152102	-0.0301879	-0.00232951	-0.0163257	0.00743065	-0.0332981	0.0141842	-0.00424022	-0.00811337	0			11.4	0.0634825	0.0911025	0.0638058	0.00782723	0.020344	1
11.6	0.0189764	-0.0272114	0.00473622	-0.0466346	0.000255788	-0.00405866	-0.070958	-0.0137661	-0.0151438	-0.0207747	0			11.6	0.0561902	0.0892907	0.0674267	0.0214667	0.0187655	1
11.8	0.00260221	-0.0186363	0.0211807	-0.0303981	0.0134075	0.000470943	0.0160441	0.0139147	-0.00407913	0.0404972	0			11.8	0.0379855	0.0466757	0.0599181	0.0213995	0.0356576	1
12	-0.00129272	0.0162276	0.0468635	0.0290995	0.0192127	-0.0100779	0.0500116	0.00773145	0.011896	0.0278713	0			12	-0.0047971	0.0375027	0.0366213	-0.0087508	0.00762104	1
12.2	-0.00798487	0.0178698	0.00577299	0.0143282	-0.0334397	-0.0177228	-0.0675273	-0.0346344	0.0346784	0.00441123	0			12.2	-0.0110604	0.0423618	0.0373394	0.00235616	-0.01925	1
12.4	-0.00133295	-0.00646748	-0.0135025	0.00883622	-0.0160916	-0.0164259	-0.026103	0.0448785	0.0169003	-0.0212148	0			12.4	-0.0106312	0.0147721	0.0204184	-0.00748036	-0.00223692	1
12.6	-0.00517942	-0.019558	-0.0385555	-0.00163176	0.00826934	0.00202927	0.073866	0.0135943	-0.0224902	-0.00163876	0			12.6	-0.01723	-0.00225491	-0.000578569	-0.021216	-0.0289517	1
12.8	-0.013917	0.00500227	-0.029616	0.0211779	-0.00283391	0.0227929	0.0254613	-0.0792726	-0.00925744	0.0166418	0			12.8	-0.0213011	-0.000128904	-0.00333041	-0.0274389	-0.0523053	1
13	-0.00804722	0.0216662	0.010326	0.0508219	-0.0110349	0.0238698	-0.0754859	-0.0271497	0.0344103	0.013693	0			13	-0.0316892	0.00180298	-0.00901395	-0.0141779	-0.0315116	0
13.2	-0.0145949	-0.0031908	-0.00721747	-0.000100428	-0.00554756	0.00601157	-0.04799	0.0326604	0.00600611	0.0245741	0			13.2	-0.0346065	-0.0151882	-0.0084236	-0.0202226	-0.0306226	0
13.4	-0.0369034	0.0127611	0.0156649	0.0069311	0.0316286	-0.0102866	0.0130836	-0.01071	-0.0462296	-0.040211	0			13.4	-0.051146	0.00348661	-0.0185859	-0.0370095	-0.0430372	0
13.6	0.00817574	-0.00803495	-0.00500106	-0.0358531	0.0263004	0.0112334	-0.01076	-0.00269037	0.0134445	-0.0219834	0			13.6	-0.0415625	0.0116672	-0.0269924	-0.0255293	-0.0379245	0
13.8	0.00444537	0.0178721	-0.0445841	-0.0443726	-0.0124927	-0.0100412	-0.0161702	-0.0116104	0.0184292	-0.00913651	0			13.8	-0.0219574	-0.0141657	-0.0243923	-0.00640614	-0.0307864	0
14	-0.0210919	-0.0105888	-0.00647439	-0.0182035	0.00280804	-0.0087055	-0.00921327	-0.0186519	-0.0262665	-0.00656979	0			14	-0.0401026	-0.00287016	-0.0241258	-0.0147507	-0.0200165	0
14.2	-0.00325177	-0.0494134	0.022932	0.00228902	0.0192064	-0.006622	0.00105597	0.00901869	-0.0396141	0.00509192	0			14.2	-0.0432621	-0.00718071	-0.00241154	-0.0195855	-0.0303398	0
14.4	0.00943136	-0.00264795	-0.00996758	0.0075213	-0.0184521	-0.0411603	0.0384231	0.0238583	-0.0110778	-0.00374982	0			14.4	-0.0343731	-0.0146802	-0.0378171	-0.0154819	-0.0502659	0
14.6	-0.020566	-0.0157616	0.0241013	-0.0209305	-0.019273	-0.00835696	0.0276472	0.00402769	0.030275	-0.000779889	0			14.6	-0.0452766	-0.00102301	-0.0571914	-0.0239569	-0.034802	0
14.8	-0.033964	-0.0124197	-0.000392233	-0.0241137	-0.0449016	-0.0325499	-0.0304359	-0.0348792	-0.0174544	0.0212478	0			14.8	-0.0350258	-0.0162836	-0.0292334	-0.00507232	-0.0266134	0
15	-0.00127435	-0.0170328	0.0197613	-0.0109388	-0.0165214	-0.02609	0.020765	0.020592	0.0790629	-0.0108007	0			15	-0.0106251	-0.00767258	-0.0109468	-0.0140582	-0.0440017	0
15.2	0.00784297	-0.0216416	0.0166142	-0.0164295	0.00187281	0.0229125	0.0205076	0.0458495	0.0304251	0.00885204	0			15.2	-0.00649219	-0.0206133	-0.0137791	-0.0321129	-0.0107706	0
15.4	-0.00209594	-0.0159731	-0.0177858	-0.0221307	0.00364235	0.0467191	0.0416529	0.0110602	-0.0362779	0.0284981	0			15.4	-0.0272787	-0.0243084	-0.010385	-0.000847528	-0.0328243	0
15.6	0.0130788	0.00104154	-0.0188422	0.0108922	0.00356827	0.0155638	0.0646088	0.00216789	0.00879402	-0.00676478	0			15.6	-0.0476961	-0.0177037	-0.00451969	-0.00501209	-0.0435446	0
15.8	0.0367045	0.0316603	0.00130423	0.041858	-0.0168933	-0.0138005	-0.0551916	0.00484187	-0.0177695	-0.0081651	0			15.8	-0.0360712	-0.0205541	-0.0117091	-0.0339657	-0.0182432	0
16	0.0354456	0.0623067	0.00967644	0.0105882	-0.00105835	0.0219258	-0.0522231	-0.0250648	0.0129873	0.00115591	0			16	-0.0255023	-0.0242978	-0.0266528	-0.0258346	-0.0233597	0
16.2	0.0116937	0.0765655	0.0203124	0.0427962	0.0311613	0.0471737	0.0256813	0.0214151	-0.0176357	-0.0330896	0			16.2	-0.0185896	-0.0302059	-0.0248951	-0.0231861	-0.0288591	0
16.4	0.00973783	0.00422694	0.0229449	0.0363326	0.0154299	0.0102047	0.0388863	-0.00984272	-0.0138645	-0.0023303	0			16.4	-0.0107189	-0.0160033	-0.0111389	-0.0223366	-0.0190049	0
16.6	0.00893734	-0.0331048	0.0217146	0.0184676	0.0173557	0.00438916	-0.00699139	-0.0365632	0.0358538	-0.00227183	0			16.6	-0.0132137	-0.0227359	-0.0290493	-0.0184667	-0.0260667	0
16.8	-0.000461812	-0.0187765	0.00310226	0.0179747	0.0314593	0.00336831	-0.0015985	-0.00401099	0.0277478	-0.0214531	0			16.8	-0.013642	-1.35044e-06	-0.0258171	0.00336835	-0.0212372	0
17	-0.00764471	-0.0223443	-0.017068	0.00488879	0.00759661	-0.0333534	0.0445132	0.0161537	-0.00207848	0.000665631	0			17	-0.00776803	-0.000406237	-0.0280055	0.0111254	-0.00902314	0
17.2	-0.00279047	0.00195957	0.00937966	-0.00548571	-0.0162277	-0.00853288	0.0255511	0.0160561	0.0375051	-0.00396751	0			17.2	0.00451215	-0.0134118	-0.00920455	0.00551658	0.00873839	0
17.4	0.0332265	0.043191	0.031285	-0.0105745	-0.0263336	0.0308821	0.00531624	-0.00487291	-0.00709301	0.0225506	0			17.4	0.00761514	-0.00282955	0.00906002	-0.01216	-0.007368	0
17.6	-0.0174082	0.00921101	-0.021722	-0.017848	-0.00538651	-0.0214558	-0.010762	-0.0289529	-0.0328279	0.013992	0			17.6	-0.0102102	-0.00429679	0.00350396	-0.00548037	-0.000573959	0
17.8	-0.0290905	-0.0339546	-0.0530541	-0.0104765	-0.0323821	0.0303673	-0.0277883	-0.00347577	-0.0204602	-0.00692002	0			17.8	0.00112611	0.0201679	-0.00812964	-0.00147849	0.00209861	0
18	-0.0311062	-0.0254744	-0.0258213	-0.04349	-0.0253178	0.0272954	-0.068177	0.0253124	0.0365581	-0.0147218	0			18	0.0125042	0.0102234	-0.00343851	-0.00499287	0.0136995	0
18.2	-0.0296034	0.00142989	-0.0243336	-0.0469094	0.0147282	-0.055163	-0.0666131	0.00789305	0.0324267	0.0077982	0			18.2	0.0082438	0.00507817	0.00201308	0.00807299	-0.00453919	0
18.4	-0.00153002	0.00170704	-0.0546306	0.0189819	-0.001666	-0.0260866	-0.00383367	-0.00343238	-0.0461268	0.0369098	0			18.4	-0.000852992	0.00265867	0.0020775	0.000808439	-0.0113374	0
18.6	-0.0462124	-0.00490344	-0.0138782	-0.0100742	0.00216141	-0.00468218	-0.0109574	0.0269388	-0.00044643	0.00546695	0			18.6	-0.00643185	-3.79171e-05	0.0272298	0.0163164	0.0106859	0
18.8	-0.00834406	0.00314275	0.017963	-0.0231168	0.0274845	-0.0158376	-0.0249904	0.00282726	0.0169366	-0.0227468	0			18.8	0.00275419	0.0148283	0.0218288	0.0166844	0.0223926	0
19	0.0148061	-0.0372976	0.00507508	0.00655914	-0.00256901	-0.0246793	0.00719491	0.00558442	-0.0161274	0.00347201	0			19	0.0225367	0.0100902	0.00834552	-0.0165508	0.014408	0
19.2	0.0144758	-0.0362146	-0.00373335	0.01606	-0.0345143	0.000922607	0.0233485	0.00993701	-0.0342127	0.0236621	0			19.2	0.00769026	0.00795436	0.0022672	-0.00248707	0.00602286	0
19.4	0.0225682	0.0078979	0.0348995	-0.00411377	-0.0140953	0.0121978	0.000124286	-0.0337473	-0.00722763	-0.00682819	0			19.4	0.00326236	0.00998468	-0.00648321	0.00822046	0.013792	0
19.6	0.0295495	0.0341676	0.0606188	0.00132316	0.00986927	-0.0040812	-0.000965454	-0.060012	0.00637922	0.00464079	0			19.6	-0.00479951	-0.00121903	0.00813654	-0.00158744	0.0137953	0
19.8	0.0188569	0.0350167	0.0168695	0.0336013	0.0161691	0.00683512	0.0397259	-0.0303614	-0.00305284	0.0548795	0			19.8	-0.0138761	-0.0157748	0.0167645	0.00281009	-0.00109702	0
20	-0.00239262	0.00325945	-0.00369584	0.0243619	0.0654056	0.018056	0.0381714	-0.0475061	0.0492411	-0.0344887	0			20	0.00590595	-0.00424187	-0.0118267	0.000441609	-0.00930157	0
20.2	0.0082036	0.0292194	0.00881292	0.0274819	0.0276274	-0.00630913	-0.0134321	-0.0189961	-0.00287632	0.0305591	0
20.4	0.0484345	3.6223e-05	0.0186664	0.0420986	0.00784301	-0.00778293	0.0123298	0.038723	-0.0191098	-0.00215683	0
20.6	0.0275934	0.00011733	-0.00348142	0.0142039	-0.00433998	-0.0279525	-0.00565397	0.0447794	-0.0224256	-0.031866	0
20.8	-0.017827	0.0338869	0.00132563	-0.0169115	-0.0184544	-0.0261729	-0.0206927	0.0406137	-0.0122564	0.00123423	0
21	-0.0199221	0.0144288	0.0315688	0.00418842	-0.00627973	0.016968	0.040687	0.0384505	0.00547844	-0.018185	0
21.2	-0.0133118	-0.0026223	-0.00728231	0.0135027	-0.0183039	0.0105874	0.00200596	-0.0121837	-0.0541186	-0.0211178	0
21.4	0.0391284	-0.00830241	-0.016348	-0.0300467	-0.0401762	0.0470135	-0.0375725	0.0333327	-0.00951583	-0.00449774	0
21.6	0.00260822	-0.0160173	0.0589721	-0.0227236	0.0180488	0.0217703	0.029012	-0.00353604	0.0341806	-0.0197707	0
21.8	-0.0335157	-0.0180398	0.021014	-0.00440607	0.0137889	-0.00878756	-0.0188495	0.0184351	-0.00968862	-0.00425733	0
22	-0.014293	0.0121586	-0.0313839	-0.00436695	-0.0166583	0.00290898	-0.0371058	0.0162713	-0.0365949	-0.0124379	0
22.2	0.00543355	0.0370537	-0.0185274	-0.0122507	0.00763249	0.00768925	0.0125384	-0.0447066	-0.00487783	-0.035085	0
22.4	-0.00355827	0.0057404	-0.0325432	-0.0264212	0.0265301	-0.00241258	-0.0101107	-0.0397493	0.0356494	-0.00734631	0
22.6	-0.00915554	-0.0207062	-0.00593544	-0.0119879	0.0175757	0.0158655	0.042436	-0.0505903	0.0888398	-0.00447912	0
22.8	0.00643377	0.0192827	0.0211104	0.0585476	0.0100731	-0.0224096	-0.0244266	-0.0149018	0.0352432	0.0381156	0
23	0.00824485	0.0280976	0.0118199	0.00547261	-0.00270796	0.00428601	-0.0103587	0.0259694	0.0474768	0.0107594	0
23.2	-0.0157634	0.0331482	-0.00354865	-0.0140549	-0.00693657	0.00656132	-0.0310401	-0.00398777	0.0213248	-0.0106136	0
23.4	-0.0127251	0.00545366	0.0218315	0.00101767	-0.0090998	-0.00809335	-0.0142184	-0.0102227	-0.0405659	0.00282877	0
23.6	0.0208454	-0.0239716	0.0122417	-0.0334456	0.00213162	0.00757529	0.0472761	0.0240296	-0.0555024	0.0054322	0
23.8	0.0247448	-0.00405111	-0.0487559	-0.0166493	0.0134791	-0.00424172	-0.0330706	-0.011836	-0.0580565	0.0101194	0
24	0.012647	-0.0950704	0.0325457	0.0285343	-0.041373	0.00269967	-0.00319328	-0.0148803	-0.00334006	0.0108367	0
24.2	-0.0137912	-0.0318266	-0.0168936	0.0307181	0.0263466	-0.0285943	0.0268158	-0.00529228	0.0071305	0.022748	0
24.4	-0.00805599	0.000724154	-0.0296774	-0.00745222	-0.028112	-0.00881051	0.0483895	0.0192374	-0.0270049	0.0223282	0
24.6	-0.00618794	-0.0140608	-0.0108362	-0.0118557	-0.0479025	0.00205495	0.0360502	0.0149593	0.00459564	-0.00637562	0
24.8	-0.0196113	-0.0179489	-0.0247265	0.00253844	0.0134217	-0.00368421	0.0112898	0.00345179	0.0165384	-0.0112995	0
25	-0.00697252	-0.0107864	-0.00242055	-0.0163455	-0.0153704	0.0126941	0.0155312	0.0295715	-0.026108	0.020585	0
25.2	0.0180442	0.0381303	0.0468676	-0.0203514	-0.0277898	-0.0135646	0.00535173	0.0352242	0.0322993	0.0144342	0
25.4	0.0129206	0.0163753	0.0266661	0.0126519	0.00304619	-0.00175854	-0.00626442	-0.00673757	-0.00748538	-0.00462314	0
25.6	-0.00607474	-0.0287631	-0.00881325	0.0102709	-0.0127769	0.0537851	0.0193517	-0.0420493	0.00216841	-0.00620248	0
25.8	0.0194712	0.0147617	-0.0184988	-0.0135848	0.0065723	0.0333537	-0.0296898	-0.0379053	0.000553032	-0.0187942	0
26	0.0407975	0.045384	0.0327668	0.0178025	0.0404442	0.0171344	-0.060012	0.0207029	0.0108628	-0.00163959	0
26.2	0.00993928	0.00887605	0.0510677	0.0312222	0.0141479	0.0248087	-0.0396867	0.0370494	0.0276039	0.0209935	0
26.4	-0.0275041	0.0171996	-0.0177795	-0.027583	-0.0199237	-0.0282792	-0.0354798	-0.0149672	-0.0175755	-0.00783445	0
26.6	-0.0369347	0.0472743	0.00220901	1.97135e-05	0.000214126	-0.0270613	0.0479245	0.0317552	0.000634831	0.00925201	0
26.8	-0.0207865	0.00862017	0.0106306	-0.0139753	-0.00118843	-0.0133191	-0.00278406	0.012542	0.0631675	0.0468909	0
27	0.0191165	0.00624235	-0.0144469	0.0163872	0.0316732	-0.0254842	0.00439859	0.00605727	0.0610877	-0.00624576	0
27.2	0.00154219	-0.00593592	-0.069376	0.021803	0.0316413	-0.00136357	0.0130959	-0.000352048	-0.0289574	-0.0177178	0
27.4	-0.0297599	-0.0200988	-0.0533756	-0.00986993	0.00814257	-0.00331658	0.0286965	0.00543622	-0.0426071	-0.000205182	0
27.6	-0.0161514	-0.0140527	0.0125015	-0.00900199	-0.00494161	-0.0265724	0.0630446	0.0253	0.0145657	-0.0500387	0
27.8	-0.0031164	-0.0303599	-0.00730955	0.00699349	-0.0267061	0.021791	0.00807199	0.000149567	-0.0378581	-0.0595638	0
28	0.0342714	0.0103496	0.00311179	0.0158649	0.027275	-0.0293913	0.0126843	0.0163506	-0.0488206	0.0186991	0
28.2	0.00295759	-0.0174391	-0.0316809	-0.0212632	-0.00600361	-0.0241446	0.00335791	0.0515894	-0.0315805	0.00783779	0
28.4	-0.0280017	-0.0150049	-0.00403815	-0.00723166	-0.00460463	0.0157645	-0.0199883	0.0127756	-0.00664299	0.00296347	0
28.6	-0.0137048	-0.0133221	0.0385619	0.00916716	-0.00200742	-0.00136758	0.0156091	-0.0423197	-0.00654817	0.00458946	0
28.8	0.0222086	-0.0299385	0.0228518	-0.00563629	-0.0411751	-0.00409026	0.0418619	-0.0591776	0.0142115	0.0157623	0
29	0.0332634	-0.00821014	0.0131421	-0.0104532	-0.0485948	0.0367171	-0.0302274	-0.0451558	0.0487335	0.0514923	0
29.2	-0.0010125	0.00770441	0.0277644	-0.02417	-0.022947	-0.00167495	-0.0807982	-0.00476042	-0.00236057	0.00796667	0
29.4	-0.0110975	0.0181665	-0.0229102	-0.00353886	0.0182051	0.00978522	-0.0257686	-0.0379066	0.00763534	-0.0437277	0
29.6	-0.035608	-0.018445	-0.0202287	0.0157636	-0.0164097	-0.0143004	-0.0135593	-0.0311771	-0.0282304	-0.0223178	0
29.8	0.0170022	-0.0428179	0.00579208	0.00838841	-0.00633689	-0.005515	-0.0428231	-0.00121194	-0.0207921	0.00667434	0
30	0.040481	-0.0406312	0.00334984	-0.00468854	0.00504867	0.0225158	-0.0173198	-0.0268994	0.0390792	0.0176451	0
30.2	0.00555437	-0.0056155	-0.0021244	0.0019918	-0.00989232	-0.00745716	0.0538102	-0.0514442	0.018238	0.00420817	0
30.4	0.025761	0.0485666	0.00709696	0.00480054	0.0376288	-0.0402442	0.0646438	-0.00723004	-0.0568071	-0.0385355	0
30.6	-0.0208945	0.0224374	0.00587723	-0.0215072	0.0435856	-0.0057216	0.00686395	0.0180954	-0.00482187	-0.0247108	0
30.8	-0.0291328	0.0233649	0.00841706	0.0117573	0.0249301	-0.0146665	0.010124	0.0831814	0.0439475	0.0200443	0
31	0.00315695	-0.0178833	0.0029412	0.0212553	-0.0157665	-0.0231014	0.0204531	0.0508405	0.0332714	0.0138871	0
31.2	0.0167934	-0.0174706	-0.00756703	-0.0268162	0.0299216	0.00583804	-0.0398637	0.00345715	-0.000144189	0.0417203	0
31.4	-0.00463905	0.0230967	-0.00622474	-0.00914004	0.0415073	0.0610259	-0.0733433	0.0205129	-0.0222204	0.0293991	0
31.6	-0.0188601	0.0171011	0.00623728	0.044767	-0.0314272	0.057728	-0.00914411	0.0200509	-0.0129228	-0.0332235	0
31.8	-0.0046181	0.0138079	0.00795454	-0.00144743	0.00540273	-0.0247749	0.0239504	-0.019851	0.0214003	0.0238535	0
32	-0.00312507	0.038202	-0.00132988	0.0449487	-0.00706976	0.0216604	-0.0117114	-0.00099511	0.00729885	0.00500763	0
32.2	0.0342979	0.0187956	0.0202502	-0.00466355	0.00626343	0.0535097	0.0353925	-0.00537905	-0.0424498	-0.00635287	0
32.4	0.00980795	0.00565009	-0.0032194	-0.0050561	0.0172853	0.012413	0.0450753	0.0393524	-0.0279015	-0.0245014	0
32.6	-0.0210631	-0.0064031	-0.025937	0.0213541	0.01086	-0.0261827	-0.00381793	0.0051346	0.026063	-0.0437502	0
32.8	0.00928441	-0.0421899	-0.0152071	-0.00417934	0.0171285	-0.0491335	-0.029546	-0.0668608	0.0181705	-0.0221607	0
33	0.0229465	-0.035072	-0.0077263	-0.0306435	0.00452431	-0.0535178	-0.0213741	-0.00398157	-0.0170284	0.0200798	0
33.2	-0.0131839	0.0341139	0.017527	-0.043317	-0.0595634	0.00838016	0.00687219	0.0325819	0.0310552	0.0243223	0
33.4	-0.00815925	-0.00715921	0.00864419	0.009871	-0.0457886	-0.0197853	0.0487293	-0.00321061	0.0396278	-0.000527865	0
33.6	0.00260561	-0.00987387	0.0145048	-0.00746467	-0.0353737	-0.00667042	-0.00303678	-0.0450197	0.0404928	-0.00400329	0
33.8	-0.0254674	0.0386695	-0.00223629	-0.0156967	0.00034582	0.0156223	-0.0192909	-0.0280806	0.0213765	-0.023762	0
34	-0.0197372	0.0155595	0.00280049	-0.0149329	0.015228	-0.00210279	0.000582357	-0.00722848	-0.0243234	-0.011933	0
34.2	0.00451166	-0.0352606	0.0233395	-0.0165337	-0.0192132	-0.0141873	-0.027425	-0.00504476	-0.0390381	0.0424488	0
34.4	-0.016288	0.0138071	-0.00479979	0.0342788	-0.0110665	0.0131975	-0.0349155	0.0243385	-0.0116532	0.0361611	0
34.6	0.0381318	0.0441015	0.0330262	0.0241884	0.0214147	0.0481277	0.0138599	0.0134096	-0.02006	-0.00784604	0
34.8	0.0128294	-0.00179553	0.0345591	0.00970914	0.0330436	0.0267104	0.00351565	-0.0299271	-0.00331855	-0.0124851	0
35	-0.00443525	-0.0125404	-0.00974128	0.0033688	0.0230655	0.0179711	-0.00937135	-0.0125248	0.0302685	-0.0126725	0
35.2	0.00264287	0.0199987	-0.0357498	0.0103338	-0.000301136	-0.0228902	0.00137888	0.0268647	0.0203568	-0.0199034	0
35.4	0.0135866	0.0148499	-0.0242535	0.00239065	-0.0156042	-0.0339248	0.0226125	-0.000696279	-0.0173303	0.00542556	0
35.6	0.0224017	-0.0143124	-0.0105205	-0.0274562	-0.0150053	0.0159699	0.0264503	-0.029953	-0.0293707	0.0293014	0
35.8	-0.0103261	0.00681388	-0.0111723	-0.0206134	-0.0116427	-0.0203961	0.00693917	0.022481	-0.0176003	-0.00637299	0
36	-0.0406589	0.0101364	-0.00304618	0.00514831	0.00746077	-0.0342541	0.0501522	-0.00335555	0.00903261	0.0052573	0
36.2	-0.0181313	0.000759998	0.00775272	-0.0203262	-0.00827238	-0.0243905	0.0205983	0.0456928	0.0124236	-0.0105932	0
36.4	-0.0110839	-0.0251649	0.0128135	-0.012769	0.0171262	0.0314376	-0.0541418	0.0383807	0.0301893	0.0242322	0
36.6	0.000320055	-0.028628	0.0114166	-0.00808337	0.0207165	0.0344802	-0.0214524	0.0067948	0.0208852	0.00186387	0
36.8	0.0092507	-0.0301896	-0.00096441	-0.0119163	0.00617523	-0.00256664	0.0451034	-0.00888333	-0.0145778	-0.0578372	0
37	-0.0150483	-0.053121	-0.013435	0.0147283	0.0343119	0.00920175	-0.0206042	-0.0396257	-0.0107976	-0.0114349	0
37.2	0.00477597	-0.0138518	-0.00274977	-0.0152964	-0.00815771	-0.0193402	-0.0800272	0.0112579	-0.00899308	-0.001905	0
37.4	-0.0107003	0.0060025	-0.00430526	0.0150644	-0.0051606	0.000367831	-0.0152063	-0.0526932	-0.0177013	0.0121076	0
37.6	0.0156765	0.0065503	0.00109526	0.0409637	-0.0135905	0.023007	0.00517341	-0.0528521	0.0361626	-0.0176373	0
37.8	0.0252213	0.0185636	-0.0219004	0.0440897	-0.0251679	0.0125592	-0.039981	-0.013353	0.0195942	-0.0264708	0
38	-0.00737874	0.0233294	-0.0129406	-0.00259161	-0.0231295	-0.00472237	-0.0268593	0.0232335	-0.0371213	-0.0275336	0
38.2	-0.0258175	-0.00843993	0.0196688	-0.0480258	-0.00812289	-0.00913924	0.0345951	0.0160623	-0.00522533	-0.00913984	0
38.4	-0.0116634	-0.0237783	-0.0164957	0.00223921	0.0155613	-0.00478614	0.0171588	-0.047186	0.0189092	0.0658379	0
38.6	0.0217053	0.0348211	0.00928871	0.0238444	-0.00335103	0.0149817	-0.0207907	0.0415155	-0.0608437	0.0205657	0
38.8	0.0104805	-0.0103006	0.0379657	0.0102455	-0.0044052	0.00434056	0.0394857	0.0508316	-0.00458136	0.0262058	0
39	0.0142816	-0.00103878	0.0101561	0.0311214	-0.0155047	-0.00131218	0.0761301	0.0394459	0.0256265	0.023862	0
39.2	-0.00670051	0.0115942	-0.0138469	0.0255795	-0.00873179	-0.00682908	0.03739	0.0238902	-0.0212378	0.011606	0
39.4	-0.031092	-0.0156409	-0.00890306	-0.0148702	0.0313179	-0.0113141	0.00904441	0.00748492	-0.0540449	0.00920073	0
39.6	-0.00830556	-0.00390537	-0.0127646	-0.0112151	0.0304305	0.014613	0.0120748	0.0144395	0.00637164	-0.00508533	0
39.8	-0.00131086	0.0102918	-0.0117293	0.0156289	-0.0191922	0.0303017	-0.0112009	0.00398449	0.120281	-0.0130728	0
40	0.0328009	0.0278582	0.00492893	0.00686178	0.0264076	-0.0262324	0.00600731	0.0290256	0.0323452	-0.0222295	0
40.2	0.00657612	0.00374029	-0.0136092	0.0105012	0.0223155	0.0208754	-0.0336682	0.0323398	0.0209517	0.0191847	0
40.4	-0.008282	0.0205586	0.000584982	0.00534676	0.00525074	0.0168352	-0.0635015	-0.0232392	0.00802004	-0.00065308	0
40.6	0.00348276	0.0317911	0.026131	-0.01629	-0.0023543	-0.00969425	-0.0308489	-0.0050815	-0.0119004	-0.0208195	0
40.8	-0.00808356	0.00190244	0.0130619	-0.0308076	-0.0334794	0.00357093	0.00271266	0.0707309	-0.00351773	0.015059	0
41	-0.0246048	-0.0199579	-0.00132915	-0.0330874	-0.0291903	-0.0153862	0.0112162	0.0231102	-0.0151897	0.00967083	0
41.2	-0.0128162	-0.0548702	9.32028e-05	-0.0229267	0.0372096	-0.00288334	0.0383579	-0.0771069	0.0241137	-0.0203681	0
41.4	-0.00414877	0.0275767	-0.003129	0.00763315	-0.0318495	-0.0617545	-0.00501289	-0.0790467	-0.0134881	-0.0292947	0
41.6	0.00585321	0.0109169	0.00242928	0.020775	2.2458e-05	-0.0144479	-0.0127677	-0.0144594	-0.0184164	0.000705914	0
41.8	0.0169264	-0.0314839	0.0326187	-0.00778437	0.0131074	0.00577087	-0.0114238	-0.0338554	-0.0343449	-0.00269347	0
42	0.0254012	-0.021098	0.0169148	-0.0249962	-0.0167358	-0.0175608	0.0105209	-0.0601911	-0.0249357	-0.0119505	0
42.2	0.00843258	-0.00693832	-0.0322376	0.00496037	0.00270621	0.00437326	0.0418476	-0.0068369	0.015891	0.0161625	0
42.4	-0.0251412	0.00697621	-0.00805116	0.0206508	-0.0134985	-0.00683634	-0.0087078	-0.000324152	-0.0152129	0.0165901	0
42.6	0.00894982	-0.0140673	-0.00191538	-0.00985205	0.00272226	0.00983158	-0.00974015	-0.00807427	0.0309545	0.000434927	0
42.8	0.00172545	0.000206168	-0.00796446	0.000947668	0.0101739	0.0289708	0.0494186	0.042249	-0.0121079	-0.00148306	0
43	0.00584706	-0.0298492	0.0131587	0.0179487	0.0324498	0.0194834	0.0317072	-0.00108565	-0.000939249	-0.00960221	0
43.2	-0.00555037	-0.0179219	0.0120469	-0.00562296	0.0279366	-0.00253233	-0.0191192	-0.000955031	0.011558	-0.015148	0
43.4	-0.0174762	0.022016	-0.00687055	-0.021015	-0.0140759	0.017886	-0.0418827	0.020809	-0.0308924	-0.0121271	0
43.6	0.0107228	0.0028303	0.00276711	0.0159308	-0.0311774	0.0299107	-0.0366038	-0.0313619	-0.0192341	-0.00535906	0
43.8	-0.00112408	0.018496	-0.00688556	0.0345653	-0.0194759	-0.0535245	0.0137915	0.044203	0.0258511	0.0205862	0
44	0.013654	-0.0238197	-0.0305846	-0.00874986	-0.0161752	-0.0224261	-0.0219066	0.00263103	0.0165298	0.0367518	0
44.2	0.0157646	0.0202852	-0.0158377	-0.00352756	-0.0157983	-0.00507908	-0.00590516	0.0151878	-0.00346181	0.0251293	0
44.4	0.0116585	0.0605128	0.00143696	-0.00846343	-0.0332486	0.0056877	-0.00597447	0.01635	-0.0195641	0.0212825	0
44.6	0.0125013	0.0419103	-0.00369761	-0.0144526	-0.0216423	0.0274274	0.000560834	-0.0191595	-0.0118642	0.00400571	0
44.8	0.000933398	0.0161413	-0.0234123	0.00043497	0.0311558	0.0263296	0.0191945	-0.0351322	0.021173	0.00246602	0
45	-0.0131295	-0.00537323	-0.0168926	-0.0108322	0.045815	0.012791	-0.0215979	-0.0266616	0.0300941	0.03683	0
45.2	0.00176732	-0.0105318	0.0468704	-0.00224882	0.0105007	0.000868724	0.00866638	0.031033	-0.00079056	-0.0339053	0
45.4	-0.00966181	0.00776864	-0.01333	-0.00993543	-0.00281836	-0.0211523	0.0314122	-0.000761801	-0.0194305	-0.067096	0
45.6	-0.0253686	-0.00440337	0.00584771	-0.00626314	0.0108007	-0.0108716	0.0325588	0.0231583	-0.0114639	-0.0243033	0
45.8	-0.00240402	-0.0133064	0.00749931	0.0236479	0.0158324	-0.0291325	0.000600715	-0.0129648	-0.0191608	-0.0150704	0
46	0.00902627	-0.0261235	-0.0192724	0.0254368	-0.000665963	-0.0397427	0.0058839	-0.0672375	-0.00806114	-0.0208636	0
46.2	-0.0221584	-0.0299801	0.00342591	-0.0176553	-0.014276	0.0051772	0.0125478	0.00221959	0.00619618	0.00741697	0
46.4	-0.0210167	0.0171175	-0.0140856	-0.0320275	-0.0132174	0.0183003	-0.0678273	0.036347	-0.0479426	0.0191542	0
46.6	0.00348313	-0.0389021	0.0386593	0.00180987	-0.018186	0.0277832	0.0123989	-0.0192145	-0.0134626	0.0668428	0
46.8	-0.0186151	-0.0593335	-0.0200052	0.0438622	0.0328265	0.0246731	-0.023408	-0.015048	0.00514332	-0.0162814	0
47	-0.0145475	-0.0292603	-0.0180266	-0.00383096	0.0249639	0.00346773	-0.0611177	-0.0154701	0.000456512	-0.0315442	0
47.2	0.006537	0.00505008	-0.0143185	-0.0398804	-0.0146512	-0.00113433	0.00739794	-0.0108945	0.00995743	0.0317293	0
47.4	0.00186861	0.0262795	-0.0408749	-0.00205854	0.0149553	0.00692347	0.0314795	0.0154005	0.00262539	0.0125617	0
47.6	-0.00533678	0.0187477	2.08425e-05	0.0101331	0.0591367	-0.00618667	-0.0353066	0.0155736	-0.011018	-0.0485339	0
47.8	-0.00872873	-0.00749366	-0.0197751	-0.00987624	0.00607002	-0.0202062	-0.0143635	0.0239299	0.0408956	-0.0112787	0
48	-0.0207121	0.0314544	-0.00887904	0.00129542	-0.0658953	-0.0184778	-0.0228329	0.0310092	0.0241015	0.00825735	0
48.2	0.00427307	0.0294285	0.0342753	-0.0106718	-0.0269886	0.0116443	-0.00550166	-0.00397418	0.00165327	-0.0163494	0
48.4	0.0406013	-0.0152107	0.0204925	-0.00843757	-0.0120999	0.000255052	0.0196297	-0.00700012	-0.0139156	0.000347025	0
48.6	0.0382795	-0.014137	-0.0151825	0.00543283	-0.0265493	-0.0189444	0.021126	-0.00893686	0.0221214	0.0312129	0
48.8	0.00607171	0.0293017	0.00195366	0.00225769	-0.00876277	-0.0108256	0.0248536	-0.0122154	0.0525139	0.018735	0
49	-0.01281	0.0270481	0.0248748	0.00329261	-0.0100194	-0.00905931	0.0375022	0.0428867	-0.00285259	0.00478624	0
49.2	-0.0127175	-0.0116242	-0.00298423	-0.00401544	0.0148135	0.0352758	0.0251596	0.0148001	0.0349048	0.00682132	0
49.4	-0.00117047	-0.010796	-0.0194292	-0.00296368	0.020571	0.013331	0.0198038	-0.0211814	-0.00807551	0.0104876	0
49.6	-0.00683526	-0.0252357	0.0232783	0.0240788	0.014906	-0.021792	0.00307436	0.0180979	-0.0580975	-0.0218335	0
49.8	0.00431923	-0.0148695	0.0308928	0.00985575	-0.0268897	-0.0127155	-0.0131597	-0.0066331	-0.0467197	0.00793688	0
50	0.0166375	-0.0203788	0.00502738	-0.00337312	-0.0417642	0.0247012	-0.0212786	-0.0462424	-0.00203333	0.0317418	0
50.2	-0.00404416	-0.047325	0.00785586	0.00314672	0.0096172	0.0333982	-0.0128876	0.00337843	0.0131489	-0.0162045	0
50.4	-0.0141989	0.0222849	-0.0116906	-0.0459958	0.0309713	-0.00545205	0.0237963	-0.000352553	-0.00423875	0.00546555	0
50.6	-0.0157144	0.00605099	-0.0273684	0.03116	0.047551	-0.0092026	0.0127604	0.00775999	0.0513724	-0.0251178	0
50.8	-0.00667748	-0.0109732	-0.0202093	0.022255	-0.0230779	-0.00047679	-0.0174109	-0.00119575	0.00364873	-0.00645688	0
51	-0.0129058	-0.0150618	-0.00339409	-0.00511363	-0.00392876	-0.0169624	0.00557894	-0.0426431	-0.00808451	-0.00193431	0
51.2	-0.015395	-0.011581	-0.00971707	0.00432779	-0.00611817	-0.0352701	0.025081	0.00796488	-0.0119486	-0.0151726	0
51.4	0.0128469	0.0110088	0.00177475	0.0100053	-0.0338396	-0.0115801	-0.0120352	0.0610291	-0.0250065	-0.00135877	0
51.6	0.0288837	0.0294896	0.0385825	-0.00115467	0.0310953	0.0197673	-0.043528	-0.0184095	0.0256278	0.0090611	0
51.8	-0.00200781	0.0194407	-0.0023581	-0.0317905	-0.0378784	-0.00876807	-0.0147614	-0.0116385	-0.00209894	0.00162313	0
52	0.0297078	0.016757	0.0109709	-0.00925665	0.0281548	-0.00211484	0.0537087	-0.0332507	0.0244746	0.005004	0
52.2	0.0468617	0.0148025	0.0130102	0.046621	0.042919	-0.00348963	0.0546982	0.0219213	0.0410277	0.0169159	0
52.4	0.0306239	-0.00121996	-0.00893908	0.023643	0.0127082	0.0182704	0.0068067	0.0283049	-0.0142015	0.00842907	0
52.6	-0.00688435	-0.0177708	0.0143552	-0.0125025	-0.00789304	0.026778	-0.0357543	-0.0344804	-0.0419697	-0.00744597	0
52.8	-0.029142	0.00215785	0.0155993	0.00271252	-0.0260692	-0.0106638	-0.0326658	-0.0178015	-0.0285518	-0.0151112	0
53	0.00877258	0.0423199	-0.0464764	-0.0224905	0.00445368	-0.0206309	0.00860038	0.0368442	-0.0380465	-0.0254337	0
53.2	0.0244066	0.0119578	0.0473486	-0.034674	0.0455794	-0.00917933	-0.0163127	-0.026079	0.0647717	-0.018355	0
53.4	-0.0287575	-0.0262851	-0.0219167	-0.00308818	-0.000334028	0.039256	-0.0216575	-0.0158776	0.0301845	-0.0226226	0
53.6	-0.0329916	-0.0272552	-0.0255143	0.00783003	-0.0119703	-0.00355789	-0.0237013	0.0303655	-0.0510706	-0.000141984	0
53.8	-0.0154585	0.00993829	0.00105316	0.00203555	-0.0127629	0.00320744	0.0115385	0.0502235	-0.024747	0.0124938	0
54	-0.00688999	0.00749948	0.00448885	2.69857e-05	-0.0135314	0.0500559	0.0190541	0.00266726	0.0152591	0.0135848	0
54.2	0.020597	-0.0273688	0.026623	-0.00186339	0.00606023	0.00437475	-0.0333179	-0.0407584	-0.0046254	0.0293316	0
54.4	0.017748	0.0165273	-0.0385217	0.00606143	-0.0305808	-0.000701128	-0.00355735	0.0253688	0.0228587	0.0211778	0
54.6	-0.00528365	-0.00149792	0.0283237	-0.00766002	-0.0125452	-0.0161196	-0.0128059	-0.0488626	-0.0271761	0.0326164	0
54.8	-0.0102955	-0.00777372	0.00188559	-0.0278229	-0.015503	-0.0183868	0.0143531	-0.0185097	-0.00555852	0.00859169	0
55	-0.0082715	0.0287624	-0.004913	-0.00817235	0.0115287	-0.0197156	0.0138363	0.00959627	-0.0101489	0.0297656	0
55.2	-0.00954302	0.0395878	0.0281452	0.0147032	0.00911156	-0.0087271	0.00318985	-0.00290069	-0.0206445	0.0195615	0
55.4	-0.0125141	0.00639858	0.0104004	0.000895318	-0.0104459	-0.00714054	-0.00409636	-0.00140617	0.0346836	-0.0234922	0
55.6	-0.0122672	-0.00353049	-0.010153	-0.00334402	0.0309176	-0.027999	-0.0400421	-0.00687712	0.0556641	0.00481912	0
55.8	0.00505157	0.0133657	-0.00960823	0.0296293	-0.0195081	0.007882	-0.00612037	0.0297914	-0.00119554	-0.0235421	0
56	0.0195439	-0.0191397	-0.00850679	0.0270628	-0.0179743	-0.0154738	0.00698581	-0.00761747	-0.0406976	0.0105813	0
56.2	0.0247374	0.0215417	-0.0108095	0.0240628	0.0148362	-0.0264618	0.0474652	0.0126251	-0.0135971	-0.0232262	0
56.4	-0.00641521	0.0133617	-0.0218006	-0.000680304	0.0326066	-0.00729527	0.00387795	0.010146	-0.00186638	-0.0243417	0
56.6	-0.00721342	-0.0558936	-0.00216668	-0.0215749	0.0286068	0.0235406	-0.0574408	0.0157517	-0.0310152	0.0107723	0
56.8	0.0303007	-0.0398768	0.0252301	-0.00259231	0.00845576	0.0383413	-0.00546785	0.0488739	-0.044323	-0.0207407	0
57	0.000708093	0.0135022	-0.0185802	-0.00990819	-0.00673118	0.00662357	0.0279734	-0.0378165	-0.0266304	-0.0307691	0
57.2	-0.0127908	-0.0174806	-0.0364406	-0.059687	0.00163676	0.00298615	-0.0071833	-0.0505977	-0.00708848	0.0186565	0
57.4	-0.00739648	-0.0104987	-0.00395432	-0.0500219	-0.021488	0.0364356	0.0311885	-0.0222586	-0.0281074	0.0246301	0
57.6	0.00661769	-0.017451	0.00872678	0.00564992	-8.19361e-05	-0.00286242	0.0288753	0.0181485	0.0107297	0.0331198	0
57.8	0.0254872	-0.0256146	-0.00534491	0.0115787	0.0198846	-0.0151953	0.00457059	-0.00606777	0.0537772	0.0426966	0
58	0.0131687	-0.0116731	5.06216e-05	-0.0240734	0.0222996	0.0221157	0.022322	0.00551314	0.0117922	0.0309102	0
58.2	-0.0124324	-0.0114105	0.0145273	-0.0088694	0.0417752	0.0302003	0.0278227	0.0622307	-0.0262494	0.0135819	0
58.4	0.0186949	-0.00590386	-0.0021592	0.0390369	0.0178156	0.0768393	0.012097	-0.0578005	0.027974	0.00636162	0
58.6	-0.00855432	-0.00379295	0.0150964	0.0213934	0.0398284	0.0443458	0.0175661	0.0264614	0.0312594	0.0658166	0
58.8	-0.00984128	-0.0130346	0.0342531	0.0192596	0.0308719	0.0330397	-0.0195711	0.0212661	0.0415288	0.0423557	0
59	-0.00774559	0.0575887	0.0130371	0.00449923	0.0332527	-0.000744586	0.00192461	-0.0189937	0.00507353	0.0402574	0
59.2	0.00469051	0.0738217	0.0076423	-0.0179286	0.0291528	0.00293517	0.0347523	-0.0207676	-0.0498953	0.072153	0
59.4	0.0338983	0.00398796	0.0204106	-0.00348839	0.00514187	0.0522233	0.02525	0.00729756	-0.0316992	0.0289928	0
59.6	0.0337551	0.0178438	-0.00299543	0.00640648	0.0163542	0.0321804	0.0667863	0.0766363	0.016017	-0.0133365	0
59.8	0.0440499	0.00655708	0.0118708	-0.0275482	0.0143491	0.0376348	0.0935721	0.0304624	-0.00607827	0.0794214	0
60	0.0477744	0.0537571	0.028542	-0.00368839	0.0581332	0.0197786	0.056611	-0.00955136	-0.0435496	0.0888801	1
60.2	0.125961	0.118934	0.141763	0.0666443	0.0837285	0.108536	0.129348	0.0985825	0.0723097	0.103323	1
60.4	0.202941	0.222984	0.191368	0.103238	0.0729877	0.215299	0.214522	0.100575	0.104913	0.166702	1
60.6	0.224431	0.260587	0.16193	0.121249	0.0670708	0.2432	0.179544	0.0587521	0.0607912	0.138407	1
60.8	0.198268	0.189959	0.155428	0.130372	0.0786986	0.201538	0.125926	0.107196	0.0910047	0.0473416	1
61	0.118341	0.188471	0.107118	0.0861954	0.0749013	0.127464	0.140593	0.0204144	0.0448489	0.0679755	1
61.2	0.0973224	0.16204	0.115568	0.0909178	0.0411964	0.168593	0.0838432	0.0406383	0.0511053	0.00829015	1
61.4	0.0554055	0.134074	0.0927669	0.0335623	0.0523439	0.127045	0.0636539	0.0563689	0.0494009	0.000831219	1
61.6	0.0699392	0.0996727	0.092621	0.0284352	0.0999254	0.079756	0.100869	0.0611409	0.0381395	0.0322341	1
61.8	0.0536378	0.125571	0.101553	0.0392727	0.0783027	0.0565199	0.0799856	0.0457404	0.00717185	0.0442975	1
62	-0.0084532	0.144716	0.0717974	0.0178912	-0.000921018	0.0160924	0.016998	0.0193459	-0.0228633	-0.00159636	1
62.2	-0.00839772	0.0728199	0.0506274	0.027443	-0.0055869	-0.00491655	0.01052	0.0206013	-0.0235384	-0.047572	1
62.4	-0.0233185	0.0586689	0.0642962	0.0212159	0.0511918	0.00351191	0.00846211	0.0118041	-0.0477929	0.0240328	1
62.6	0.0118089	-0.0065782	0.0324646	0.0184913	0.0236175	0.000368892	0.0388289	0.0179847	-0.0480632	-0.00753194	1
62.8	0.0108991	-0.0128796	0.0200814	-0.00497623	0.0217976	0.030347	0.050989	-0.00664312	-0.0086335	-0.0682495	1
63	-0.0101888	-0.00316114	0.0125874	-0.00736192	0.0199158	0.0226924	0.00978123	0.0108767	0.0204714	-0.0426153	0
63.2	-0.0432051	-0.0286813	-0.00337989	-0.0216576	0.0001573	-0.0124135	0.0127756	0.055418	0.0202457	-0.0323577	0
63.4	-0.0724995	-0.0385946	-0.0246232	-0.0490947	-0.00300944	-0.0133283	0.0953026	0.03223	0.0101939	-0.0703979	0
63.6	-0.0520867	-0.0220285	-0.0447611	-0.016058	-0.00695691	-0.000428426	0.11846	-0.0140659	0.0114522	-0.0385241	0
63.8	-0.0531864	-0.0202145	-0.00647696	0.000406272	-0.00889381	0.0177923	0.0397395	0.0315108	0.0374725	-0.0223481	0
64	-0.0507539	0.0449195	-0.0132499	0.0137683	-0.00735526	-0.00278494	-0.00251585	0.0578883	0.0190998	0.0198626	0
64.2	-0.029767	0.0159157	0.00623314	0.0139134	-0.00437527	0.0217451	0.0283278	0.0446418	0.002563	-0.017176	0
64.4	-0.0174117	-0.0219191	-0.000653281	0.0215309	-0.0304306	0.0156829	0.0648513	-0.0185632	0.0154758	-0.0710192	0
64.6	-0.0190207	-0.0180615	-0.0244748	0.0218189	-0.056484	-0.0300028	0.0619652	-0.0484084	0.0127903	-0.0385893	0
64.8	-0.0166361	-0.0267119	0.00198031	-0.0163273	-0.0433781	-0.0104158	0.0523303	0.00572786	0.00556116	-0.0186573	0
65	-0.00376292	0.00679873	0.0142701	-0.0345266	-0.0222583	0.0384628	0.0536528	0.0219893	0.0411226	-0.079188	0
65.2	0.0210699	-0.0224856	0.0413458	0.018457	0.0130456	0.0339251	0.000745856	0.012244	0.00841861	0.011986	0
65.4	-0.0335654	-0.0113609	-0.00421713	0.00499662	-0.00669732	-0.0201315	-0.000308318	0.016321	0.0250379	-0.0195565	0
65.6	-0.0348222	-0.00272486	-0.0106512	-0.0391868	-0.0196235	-0.0608109	0.00843537	0.0195463	0.0394167	-0.0357223	0
65.8	-0.0231018	-0.0216678	0.000184711	-0.0352011	-0.0168127	-0.0719459	0.0237603	-0.0118775	-0.01392	-0.0162003	0
66	-0.0474144	-0.0267618	-0.0292098	-0.0159661	-0.0319651	-0.041568	0.0117613	-0.0366054	-0.0380807	-0.0455895	0
66.2	-0.0207972	-0.0278012	-0.0374028	-0.0125798	-0.0268721	0.0206448	-0.0290685	0.00858178	0.020525	-0.0461575	0
66.4	-0.00499022	-0.0493644	-0.0244457	0.0235574	0.0240298	0.0243643	0.0369782	0.0508206	0.00806769	-0.0262473	0
66.6	-0.0152135	-0.0185899	0.0191667	-0.00261778	0.0307357	0.0032707	-0.0369409	-0.0245905	-0.0390083	-0.0604449	0
66.8	-0.0311058	0.000799054	0.0242197	-0.00773657	5.29065e-05	0.0088885	0.0367674	-0.0760368	-0.000255047	-0.049716	0
67	-0.0123479	0.00417648	-0.0262068	0.0241585	-0.00550555	0.0198416	0.0190355	-0.0184346	0.0414671	0.00741414	0
67.2	0.0290032	0.00310913	-0.0226787	0.0382354	0.0135107	0.0204942	-0.053644	-0.00699294	-0.00125482	-0.00276822	0
67.4	0.0216547	-0.0128039	0.0154973	0.00378954	0.00199803	0.0106023	0.00739548	-0.0492635	-0.0350212	-0.0181708	0
67.6	-0.0262656	-0.00548163	-0.0406431	-0.0406869	-0.027184	-0.0112846	-0.00379085	0.017747	0.0131952	0.0474405	0
67.8	0.00858383	0.0500896	-0.040307	-0.0152862	0.00476937	-0.00856463	0.0156074	0.00489192	-0.00633108	-0.0509714	0
68	0.00232161	-0.00953138	-0.0239935	0.00174551	-0.00294306	-0.0133339	-0.0168898	0.0336067	-0.0338782	0.00690579	0
68.2	-0.00484634	-0.00157508	-0.0159833	-0.0299845	0.000877107	0.00677472	-0.0175364	-0.0025647	0.0327915	0.00982378	0
68.4	-0.00308282	-0.00285752	-0.00166933	-0.0208491	-0.0176922	0.00851845	0.00452095	-0.0407981	0.0753032	0.00282439	0
68.6	-0.00137547	-0.044804	0.0158656	0.0254252	-0.0488126	-0.0114	0.00459414	0.000520034	0.0360219	0.0580069	0
68.8	0.0191537	0.00222589	0.0188816	0.00945813	-0.0207762	-0.000985694	0.00547602	0.0276057	-0.00879948	0.0444967	0
69	0.0194513	0.0331174	0.0130498	-0.0306995	0.00463088	0.012421	0.00285628	0.00287256	-0.0619772	0.00993617	0
69.2	-0.0246772	0.00688492	0.0130738	0.000230311	0.00291926	0.0181726	-0.00743886	0.00798192	-0.0747237	-0.00425759	0
69.4	-0.016259	0.00760815	-0.00184182	0.03431	0.0168822	-0.00906868	-0.00163631	0.00696724	-0.0687224	0.0250466	0
69.6	0.0060135	0.0194747	0.0177355	0.00779191	0.0313921	-0.00990579	0.0047401	0.0549349	0.00919428	0.00687827	0
69.8	0.00105082	-0.00810302	0.0389631	-0.00562455	0.00850903	0.00472051	-0.0210268	0.063317	0.0296384	-0.0318603	0
70	-0.00118602	-0.0190303	0.0135892	0.0112766	-0.0315453	0.00366215	-0.0151408	-0.00544748	-0.00923367	-0.0339647	0
70.2	0.0157085	0.0238346	-0.00494564	0.00222603	-0.0359467	0.0125422	0.0326853	-0.0275791	0.0427891	-0.0259703	0
70.4	0.021798	0.00109667	0.00788228	0.0318203	-0.012705	0.00613569	-0.0340803	-0.0403457	0.0170036	0.00204081	0
70.6	0.00205606	-0.0073713	-0.0286831	0.0137398	-0.0105084	-0.0373756	-0.00332072	-0.0568334	-0.0257969	-0.0099295	0
70.8	-0.0181285	0.0147857	0.000572535	-0.00625505	-0.0374775	-0.00274309	0.0260991	-0.0124555	0.00348356	-0.0108157	0
71	0.000457146	-0.01023	0.0226952	-0.0035997	0.0192683	0.028334	-0.00318352	-0.00170111	0.0284376	0.0209199	0
71.2	0.0256625	-0.0221484	-0.0137016	-0.00418358	0.069847	0.00103752	0.00695916	-0.00853188	0.0228855	0.0320397	0
71.4	0.0246301	0.0112967	-0.0146113	-0.0171966	0.0238515	-0.0164609	0.0512058	0.0144729	0.00464009	-0.0058233	0
71.6	0.0225223	-0.0306585	0.0266833	-0.0260334	0.0189689	-0.00865204	0.00894859	-0.0117553	-0.0401864	-0.0199135	0
71.8	-0.00127601	-0.0467079	0.00668557	-0.0233673	-0.00654444	0.00326119	-0.0250762	0.0151166	0.00347693	0.0425349	0
72	0.0107044	0.0169129	0.00378049	-0.0128258	-0.01197	-0.00907224	0.0102135	0.0326134	0.0390014	0.000602109	0
72.2	0.00825547	0.0229269	0.00366881	-0.0322337	-0.0176641	-0.0148668	-0.00625491	0.0234228	-0.0165619	0.00373433	0
72.4	-0.00654952	0.0374696	0.0145055	-0.00418834	0.0176439	0.00855324	0.0010998	0.00842417	-0.01561	0.0158239	0
72.6	-0.00223873	0.0547151	0.0268139	0.0414394	0.0297116	0.00764181	0.0147409	0.00151117	0.0472102	-0.0113092	0
72.8	-0.00857646	-0.0155319	0.0127249	0.0120808	-0.0331362	-0.0129583	-0.0223403	0.00369018	0.0275378	-0.00569219	0
73	-0.0341479	-0.0204523	-0.000956415	0.00672185	-0.00431706	0.0280946	0.0387001	0.000990226	-0.00692949	-0.034215	0
73.2	-0.0056481	-0.00199405	-0.0589068	0.00253734	0.00831345	-0.0176385	-0.0788651	-0.0192992	-0.0448323	-0.022033	0
73.4	-0.0247918	0.00418032	-0.016934	-0.00451989	-0.00182359	0.0159005	-0.0614488	-0.019436	-0.00592275	0.0272636	0
73.6	-0.00340316	0.00328775	0.0142174	-0.00480255	0.0065784	0.0137715	-0.0272072	-0.00160244	0.0145234	0.0442568	0
73.8	0.0159861	0.0266994	-0.0144425	0.0214854	0.00191103	-0.0122689	-0.0329969	-0.0211691	0.0125694	0.0123855	0
74	-0.00298133	0.031325	-0.00664793	0.0272148	-0.0143666	0.0126803	0.00458478	-0.0270647	0.0174029	-0.0231291	0
74.2	0.0353448	-0.0186537	0.0179306	-0.0146974	0.00445628	0.00411073	0.0243677	0.0384606	-0.0223755	-0.0270767	0
74.4	0.0167353	6.5642e-05	-0.0288929	0.0132483	-0.0022314	0.0135917	0.0645681	0.0227859	-0.0334182	-0.00715255	0
74.6	-0.0101136	0.00648258	-0.012403	-0.000516626	-0.00486016	-0.00357251	0.0727437	0.0331793	-0.00918888	0.00638696	0
74.8	-0.0143061	-0.0482159	0.0100035	-0.00183636	-1.20071e-05	-0.00815584	0.0215558	0.0233405	-0.0189203	0.00946971	0
75	-0.00761463	-0.0152482	-0.0289653	0.024545	0.0174379	-0.0191916	0.00768515	-0.0465937	-0.0467298	-0.00899823	0
75.2	-0.00100783	0.0219269	0.00331113	0.0174428	0.0178684	-0.0265275	0.0137572	-0.0514473	-0.0134569	0.00426078	0
75.4	-0.0114271	-0.0292302	0.0789286	-0.0192317	-0.0201394	-0.0129804	-0.019867	0.00901655	0.0357123	0.0323174	0
75.6	-0.0312945	0.0176363	-0.0189735	-0.0115656	-0.0287866	-0.0130167	-0.0314632	-0.0349108	-0.00014716	-0.0171873	0
75.8	0.019802	0.00145735	0.00179893	0.0186381	0.0237942	0.0286777	-0.0595278	-0.0148239	0.0214745	0.00341382	0
76	0.0400339	-0.0177507	0.0389477	-0.0107836	-0.0296855	-0.0104675	0.00835741	-0.00483398	0.0369007	-0.0155863	0
76.2	0.0151977	0.0108634	0.0218043	-0.000418438	0.0095782	0.00685225	-0.0308164	0.0193209	0.0439713	0.0246108	0
76.4	-0.00336609	0.0182961	0.00325151	0.022549	0.0475965	0.0294033	-0.0616294	0.00978441	-0.00583795	0.0244439	0
76.6	0.00131913	0.00723058	0.00650394	-0.00289227	-0.016516	-0.00330439	0.0243813	-0.00263502	-0.0456809	-0.0345091	0
76.8	0.00596498	0.0174031	-0.00663114	-0.00896983	-0.0143452	-0.00377307	0.0481961	0.0388529	0.0203289	-0.000660206	0
77	-0.00178761	-0.0172916	-0.0287688	0.0160805	0.0233441	-0.0277374	0.0234147	-0.00403297	0.0365259	0.0157301	0
77.2	-0.010149	0.020436	-0.0156923	-0.0145314	0.0234449	-0.0402432	0.00305667	0.0236809	0.0224741	0.0318716	0
77.4	-0.0205026	0.0176591	-0.0345458	0.0195504	-0.0103817	-0.0281048	-0.0146684	0.0273089	-0.0224612	-0.00170579	0
77.6	0.018644	0.00710599	0.00729846	0.00539415	-0.00704139	0.019327	-0.011167	-0.0377726	-0.00384785	-0.0257948	0
77.8	0.0315268	-0.000466243	0.0202628	-0.0236728	-1.79979e-06	0.0438133	0.0296457	-0.0526388	0.00947574	-0.00962712	0
78	-0.0199418	-0.0210491	-0.0336427	0.0122668	-0.0277516	0.0255932	0.0437454	-0.0170606	-0.0307839	-0.00997955	0
78.2	-0.00712435	-0.000215131	0.0155437	0.00398927	-0.0200792	0.0134639	-0.0142485	-0.0226684	-0.0183387	-0.0154787	0
78.4	0.0406078	0.00987949	0.0208553	0.0101783	0.0145527	-0.0211331	-0.0193303	0.0509054	-0.0386277	0.0400013	0
78.6	-0.000159612	-0.00694897	0.00861064	0.0164699	-0.00216372	0.0409825	0.0243535	0.00984941	-0.00704342	-0.0182822	0
78.8	-0.01732	-0.0239658	0.0103139	0.00382096	0.010045	0.0594541	0.0272132	0.0348875	0.0251444	0.000484695	0
79	0.00304745	-0.00854248	0.0175175	-0.00206334	0.0134033	0.021566	0.0182165	0.0815569	-0.00808078	-0.00444925	0
79.2	-0.0165942	-0.000275558	0.02184	-0.00261834	-0.00875282	0.000343764	0.0190324	0.0584562	-0.00718737	-0.0390648	0
79.4	-0.0372246	-0.00631062	0.00965345	-0.0160399	-0.00858239	-0.0120656	0.0293497	0.018115	0.0412516	0.0342077	0
79.6	0.0104607	0.0337102	-0.0106589	-0.0171415	-0.0136113	-0.0253811	0.0587265	-0.0244036	-0.00160492	0.0528436	0
79.8	0.000144901	0.0124607	0.0371434	-0.00332046	0.0166539	-0.0156991	-0.0335923	0.0250467	0.0739568	0.0220927	0
80	0.00862301	0.0125435	0.0070871	0.0206306	0.0273577	-0.0041655	-0.00578156	-0.00105574	0.0880976	-0.0376773	0
80.2	0.0340376	-0.008145	-0.00860493	0.0181288	0.0216763	0.00029694	0.042336	-0.0662962	0.0503259	-0.0405091	0
80.4	0.0136117	0.0136569	0.0110506	0.0118721	-0.0152708	0.00431988	-0.0165929	-0.0214978	-0.022208	-0.00967261	0
80.6	-0.016802	0.0613242	0.00872321	0.0113139	-0.0391862	0.0042034	-0.0502491	0.0259903	-0.0475999	0.00223679	0
80.8	0.00988976	0.00343019	0.00616315	-0.00270287	0.00012272	0.00853622	0.0135487	-0.043884	0.000618139	0.00148465	0
81	0.0269266	-0.0318135	-0.00136053	0.0103263	-0.00170972	0.0292389	-0.0170731	-0.00388065	-0.0980645	-0.0161149	0
81.2	0.00835477	0.0152832	-0.00215058	-0.00148446	0.00405445	-0.0145069	-0.0375455	-0.0222011	-0.0154536	0.0332591	0
81.4	0.00799032	0.0231079	0.0250192	-0.0267118	-0.0140716	0.00790614	-0.0003411	-0.0422454	0.024877	-0.00701323	0
81.6	-0.00496606	0.0105305	0.0191401	-0.000363995	0.0161725	0.00376901	0.0237164	-0.0350628	0.00663224	-0.032518	0
81.8	-0.00649822	0.0218642	-0.0138017	0.0324447	0.034375	-0.00344922	0.000642274	-0.00924967	0.00464148	0.0196921	0
82	0.00653182	0.0108241	-0.0195383	-0.00620094	-0.00315633	0.0147868	-0.0238931	0.0360314	-0.00873736	0.0188721	0
82.2	-0.0236371	-0.040066	-0.0125263	-0.0484448	0.014391	-0.0568446	-0.022816	0.0418085	-0.0133896	-0.035109	0
82.4	0.0181734	-0.0520519	-0.00405336	-0.00816261	-0.0148634	-0.0104269	-0.021765	-0.0342744	0.00584574	0.0109477	0
82.6	0.0282625	-0.0180064	-0.0165227	-0.0225206	0.0114368	0.00222542	0.00166902	-0.00926479	0.023546	0.0245627	0
82.8	-0.0128233	-0.0190501	-0.0420418	-0.0252346	-0.000726487	-0.00850376	-0.00127507	0.0186665	-0.0227547	0.0127597	0
83	-0.0160878	0.00674531	-0.0378187	0.000919223	-0.0342627	-0.029791	0.00679387	0.0490228	-0.0434949	-0.0138962	0
83.2	0.00677598	0.0429574	-0.0114824	0.011807	-0.000967648	-0.0309656	-0.0137843	0.053575	-0.00889658	-0.0136104	0
83.4	-0.0167587	0.0146116	0.00379367	0.00807963	0.0299988	0.028956	-0.0607696	-0.0141559	0.0138402	0.024196	0
83.6	-0.0334675	0.0130742	0.0187772	0.00943673	-0.0269725	0.0575985	0.0257767	-0.00656558	0.0402033	0.00576045	0
83.8	-0.00953149	-0.0107386	0.00381287	0.049159	-0.0093333	0.0046431	0.0178924	0.00594359	0.0075065	0.0362142	0
84	0.0074656	-0.00863761	0.0136638	0.0281426	0.000500518	-0.00430407	0.0170077	0.0187942	0.00467069	0.0121343	0
84.2	0.0120907	-0.0196559	0.0315964	-0.00492332	0.00362227	0.0150753	0.0254127	-0.0128877	-0.000402521	-0.0172887	0
84.4	0.00412677	-0.0301612	0.00339366	-0.0109848	-0.0102879	-7.92047e-06	-0.00543729	-0.0272094	-0.0120505	-0.0145948	0
84.6	-0.017407	-0.0175967	-0.0293261	-0.0143817	-0.0339769	-0.0174684	-0.0125366	0.000491096	-0.0165389	-0.0155437	0
84.8	-0.0240376	-0.0220543	-0.00997472	-0.0158884	-0.00738976	-0.000312573	0.0291334	-0.0162289	-0.0243699	-0.0255087	0
85	0.000341121	-0.013435	-0.0120398	-0.0132365	0.0110954	-0.0160916	0.00456389	-0.0305889	0.0217899	-0.0250287	0
85.2	0.0127732	0.0210959	0.0153484	-0.00616044	-0.0105608	-0.0449694	0.0412118	-0.0232791	0.0302885	0.0435051	0
85.4	0.0129128	0.013978	0.0150436	0.0108288	0.0366303	0.0117365	0.0432203	-0.0309375	-0.00126081	0.0589515	0
85.6	0.00405069	0.00309142	-0.00645104	-0.00387323	0.0417704	0.0378493	-0.00889761	-0.0176084	-0.00493644	0.0191106	0
85.8	0.00252121	0.00313031	-0.0126288	0.00758522	0.00441559	-0.0075523	-0.0611033	0.00324803	0.0166937	-0.0181333	0
86	0.00238598	-0.00999022	-0.00755276	0.0361536	0.0291078	-0.0210032	-0.0645735	0.0138365	0.0163083	-0.0337359	0
86.2	-0.0269578	-0.00304662	-0.000374912	-0.026492	0.0421358	-0.00602982	-0.00271227	0.0567445	-0.0040196	-0.0322875	0
86.4	-0.0282404	0.00155736	0.00886821	0.00601631	0.0289452	-0.0139173	0.0148945	0.0438296	-0.0320318	-0.0473824	0
86.6	0.0288233	-0.0210638	0.0154032	-0.0159449	-0.0314805	-0.0189221	-0.00656805	0.00450336	-0.0275739	0.0363034	0
86.8	-0.00501909	-0.00623912	-0.0146187	-0.0298469	-0.0240649	0.00875489	-0.00829415	-0.0341656	-0.039904	0.0411012	0
87	-0.040261	0.00731452	-0.0157009	0.00950802	0.0014351	0.0244241	-0.00684498	-0.0394141	-0.0224036	-0.0270826	0
87.2	0.0106807	-0.0024995	0.011958	-0.000970491	-0.0306996	0.0161885	-0.000198881	-0.0137722	0.0139227	-0.0427638	0
87.4	0.0333432	0.0159457	-0.0133311	-0.0491036	-0.0398729	0.00841904	0.024334	0.00966081	-0.00208249	0.000157641	0
87.6	0.00531577	0.0226794	-0.0336683	0.0183171	0.00364744	-0.0232119	0.00191246	0.0202585	0.0143796	0.0560813	0
87.8	-0.0201386	-0.011808	0.00876661	0.02433	-0.0169555	-0.0106067	-0.00516923	-0.0171545	0.0426649	-0.0110117	0
88	-0.00238265	-0.0365155	0.0268273	-0.0174704	0.00751903	0.0455326	0.0264042	0.00157447	-0.0316768	-0.0691763	0
88.2	0.0012908	0.000954092	0.0120572	0.0138774	-0.0213675	0.0184998	-0.00278496	0.087985	-0.033604	-0.000101001	0
88.4	-0.00252358	0.0208292	-0.0099406	0.0351489	-0.0319093	-0.0222655	-0.0298958	0.0590622	0.0291822	0.0591567	0
88.6	0.0105698	-0.0228542	-0.0140368	-0.029021	0.0149602	0.0169603	0.011026	-0.0650042	0.0122655	0.0261282	0
88.8	0.00411467	-0.0420586	0.0134643	-0.0384703	-0.0243979	0.0289101	0.0128223	-0.0407472	-0.0286827	0.00707784	0
89	5.38192e-05	-0.0245155	0.00742337	0.0270675	0.0150326	-0.00966019	-0.00701967	0.0187809	-0.0299561	-0.0356892	0
89.2	-0.0126427	0.0236995	-0.0399174	0.0038649	0.0117727	-0.0421787	0.0158962	-0.0134646	0.00996569	-0.0102981	0
89.4	-0.0355032	0.0270498	-0.000963689	-0.00839387	0.0129739	-0.020942	0.0176789	-0.0223159	-0.0119449	0.0055992	0
89.6	-0.0179403	-0.0103081	0.0346466	0.0121794	0.000189483	0.00443351	-0.0154844	0.00377609	-0.00243732	-0.00115144	0
89.8	0.0185588	-0.0108018	0.011409	0.0240122	-0.00854624	0.0150626	-0.0168805	-0.0101659	0.0397996	-0.0123476	0
90	0.021708	0.0162298	0.00267905	0.0243174	0.0297957	0.00871066	0.0173754	-0.029009	0.00562923	-0.0277661	0
90.2	0.0202117	-0.000650646	0.000208183	0.0106526	0.033849	-0.0443398	0.0122669	0.00842637	-0.0188583	-0.00561255	0
90.4	0.00300065	0.0198187	0.0107979	0.0178241	0.0131663	-0.0240972	0.00079672	-0.00523225	0.0346582	0.0422649	0
90.6	-0.0080319	-0.00565795	-0.0179063	0.000876766	-0.0115939	0.0507419	0.0242299	0.0188619	0.0236528	0.0394933	0
90.8	0.0217013	-0.0186341	-0.0380463	0.00435401	-0.0118279	0.00619649	0.0118524	-0.00829866	-0.00110182	-0.0473168	0
91	0.00511114	0.0209056	-0.0103602	-0.0141505	-0.0136154	-0.0187468	-0.0380466	-0.0377776	0.0100468	-0.0475303	0
91.2	-0.0287465	0.0108896	0.0146924	-0.0422126	-0.029272	0.0295642	-0.034921	-0.0389953	0.0166337	0.0229322	0
91.4	0.01069	-0.0432069	0.00151589	-0.0124162	-0.0327461	-0.011092	0.028688	-0.0507031	0.000611567	0.00650576	0
91.6	-0.0068857	0.0288266	0.00311108	-0.0196593	-0.0330654	-0.0145174	0.0251384	0.0451819	-0.00965346	0.034104	0
91.8	0.0174564	0.000386665	-8.20631e-05	-4.70916e-06	-0.0119792	0.00556739	-0.0504815	0.0378235	-0.00192643	-0.0214717	0
92	0.000719009	-0.0280342	0.0126639	0.0106245	-0.00152976	0.021637	0.0112797	-0.00725321	0.00916538	-0.0235221	0
92.2	-0.0145264	-0.013436	0.0123436	-0.00735788	0.017461	0.0104798	0.0199607	0.0275318	-0.00323015	0.0170949	0
92.4	-0.0114727	0.000106484	0.0159649	-0.00727098	0.0374855	-0.00950627	-0.0350862	0.0634441	-0.0193641	-0.0100915	0
92.6	-0.000641334	0.00930083	0.0186685	0.0165749	0.0339697	-0.0130471	-0.0206151	0.0227176	-0.00561897	-0.0370325	0
92.8	0.0407565	0.0299459	-0.0223287	0.0103243	0.0133959	-0.000935543	-0.0307612	0.00269561	0.0102998	0.0298584	0
93	0.00907687	0.0451396	-0.00276037	0.0018033	-0.0216773	0.0295718	-0.00612502	0.0272994	-0.0158309	0.0121759	0
93.2	0.0117025	0.0273246	0.0248286	0.0320197	0.0401613	0.00400971	0.0160857	-0.00243109	-0.0184769	0.0214201	0
93.4	-0.000357434	0.00523289	0.0129347	0.016255	0.0481095	-0.0157909	0.010754	-0.00389359	0.0249807	0.0413225	0
93.6	-0.0144326	-0.0113146	0.00367747	0.0102141	-0.00521542	-0.0100692	0.035878	-0.00255516	0.0266874	-0.00910123	0
93.8	-0.00675579	-0.0172485	-0.00364698	0.0266384	-0.016781	0.00691575	0.0411052	-0.0470734	0.0190977	-0.0430413	0
94	-0.00489837	-0.0052147	-0.0209885	0.00308764	-0.00519729	0.00942448	0.0124813	-0.0592151	0.0439683	0.0214267	0
94.2	0.000773284	0.00330541	0.00893924	-0.00428477	-0.0200662	-0.036793	0.0656356	-0.0151723	-0.0216567	0.0337876	0
94.4	-0.0126998	0.00601533	0.0154802	-0.0177048	0.0142715	-0.0294783	-0.0140626	-0.0442335	-0.0500137	-0.0300671	0
94.6	-0.00779234	0.0225284	0.00362936	-0.0246368	-0.00372967	-0.00229786	0.017091	0.0320538	0.00905573	0.00509512	0
94.8	0.00266062	-0.00449047	-0.019352	-0.0165129	-0.00356415	0.0218237	0.0087193	0.0861021	0.036257	-0.00753285	0
95	-0.00282103	-0.0329215	-0.0368562	-0.00647907	0.0204164	0.00318357	-0.0669741	0.0410625	0.00765308	-0.00469042	0
95.2	-0.00816007	-0.013375	-0.0113078	-0.00720839	-0.00690718	-0.00662548	-0.0744218	-0.0307353	-0.0278793	0.0621617	0
95.4	0.00861976	0.00342087	0.0236627	-0.00528619	-0.0393027	0.0428569	-0.0344876	-0.0556817	-0.0535425	0.0244151	0
95.6	0.030799	0.0123776	-0.0176768	0.0134278	0.0104441	0.00351955	0.0111767	0.0271154	-0.0260671	-0.0159692	0
95.8	0.0241699	0.0266379	0.0106831	0.000955131	0.0431915	-0.018175	-0.0304843	0.00366909	0.00905511	-0.0554519	0
96	0.00714319	0.0210644	-0.00102498	-0.00541998	0.0229876	-0.020928	-0.0327242	-0.0321257	-0.00403789	-0.0486243	0
96.2	-0.00139917	-0.0226151	0.00231538	-0.00749576	-0.00575084	0.00938991	0.0258238	-0.00646752	-0.00559238	-0.0240651	0
96.4	0.00548051	-0.0167559	0.0222035	0.0109504	-0.0180642	0.0318129	0.0355394	0.0231778	0.0317774	-0.00485661	0
96.6	0.0117264	0.0433893	0.0186807	0.0584026	-0.0221239	0.00945241	-0.00806713	0.027924	0.0283651	0.00242031	0
96.8	-0.0018717	0.00538562	0.0547111	0.0560746	-0.0074907	0.00198682	0.00922416	0.0379485	-0.0298239	-0.0127442	0
97	-0.00230705	-0.058804	0.00865702	-0.021702	0.0283147	-0.00147172	0.0570553	0.0127451	-0.00928033	0.0215312	0
97.2	-0.00210467	0.0207977	-0.0122016	-0.0385816	0.00650348	-0.00465895	0.0685052	-0.0185901	0.00435917	0.0392756	0
97.4	-0.020996	0.00766895	0.0200793	-0.0202317	-0.0346371	-0.0220522	0.013851	-0.000850629	-0.000707484	-0.000173692	0
97.6	-0.0223381	-0.0317579	0.0021593	0.00156987	-0.0102428	-0.0139462	0.00825362	-0.0131031	0.00642759	-0.0108935	0
97.8	0.00978808	0.00941936	-0.0201972	0.0103156	-0.00989362	-0.00104261	0.0289272	-0.0186004	-0.00347449	-0.00959314	0
98	0.00157539	-0.00590936	0.0269982	-0.00582097	-0.0743964	-0.0204737	-0.0223682	0.0222838	-0.0173889	-0.0264002	0
98.2	-0.0576872	-0.0444041	0.00818431	0.00144009	-0.0128456	-0.00127857	-0.018156	-0.0412043	0.0414694	0.0405475	0
98.4	0.024178	0.0182752	0.0133829	0.0173662	0.0100764	0.00814254	0.0131335	0.0183254	0.0330669	-0.0188442	0
98.6	0.021739	0.00812095	-0.00467859	-0.019583	0.0225636	-0.00123507	-0.0187983	-0.0201629	0.0187693	-0.001426	0
98.8	-0.0378241	-0.0226771	-0.0435122	-0.034989	0.0131847	-0.00464013	-0.0130839	-0.00905721	0.037317	0.0290725	0
99	-0.0230285	0.0140447	-0.0531569	0.00541888	0.0171079	0.000149798	-0.00323491	0.00153851	0.00965116	-0.00512614	0
99.2	0.00933715	0.0392269	-0.0343081	0.0298769	0.017422	-0.0062652	-0.0354209	-0.0383707	-0.039335	0.00346024	0
99.4	-0.0260482	-0.00894461	-0.024022	0.00142461	-0.0304829	-0.00785754	-0.00147374	0.0344371	-0.0100677	0.0532282	0
99.6	-0.0197047	-0.0275202	-0.0137077	-0.0238569	0.0206553	0.0211843	0.0333534	-0.00467538	-0.00511819	-0.0181577	0
99.8	0.0370734	-0.00697016	0.0106725	-0.0233428	0.019846	-0.0198167	-0.0452876	0.0212175	0.0102171	-0.0170064	0
100	0.0479275	0.0361867	0.00854775	0.000937636	0.0225347	0.0348973	-0.0342317	0.0399425	-0.0125435	0.00906995	0
100.2	0.0233617	0.0231404	0.00221645	0.0186598	-0.0137477	0.049852	0.012144	0.0206032	-0.0126586	0.0284505	0
100.4	0.00661419	-0.0238499	-0.00113132	0.00470425	-0.0490951	-0.00421604	-0.000535307	-0.0118725	-0.00862751	0.00713054	0
100.6	0.00536159	-0.0164946	0.0057492	-0.00596846	0.00316136	0.00908711	-0.00681695	-0.0392192	-0.0286393	-0.0199267	0
100.8	0.0173548	0.0144678	0.0327718	0.00779951	0.0272964	0.00448866	0.00180878	-0.0242948	0.00128671	0.0469677	0
101	0.00261101	0.00443417	-0.032747	-0.0395466	-0.00247251	-0.0132441	-0.0171967	-0.009596	-0.0517198	0.00714631	0
101.2	0.0150314	-0.0329647	0.0148598	0.0192191	0.0338929	-0.0217104	-0.0488938	0.0168399	0.0124635	-0.0335183	0
101.4	-0.00145642	-0.00663326	0.0351668	0.0438686	-0.00949815	-0.0103337	0.0195342	0.00161661	0.0257679	-0.0391397	0
101.6	-0.0274503	0.000921432	-0.00290213	-0.00234957	-0.0137628	-0.0282725	0.039343	-0.00313738	0.0135036	-0.0341698	0
101.8	-0.0147495	-0.0281518	-0.0115625	-0.0217407	0.0534745	-0.0151321	-0.00276615	0.00723363	0.0372445	-0.0127048	0
102	-0.00172715	0.0102223	0.00506799	-0.0107544	0.0145265	0.0533587	0.0408569	-0.0200284	-0.0133059	0.0289906	0
102.2	-0.0196973	0.0308107	0.0322203	-0.00596298	-0.00251333	-0.00652318	0.00151028	0.00404626	-0.0463509	0.0471371	0
102.4	-0.0305585	-0.0101729	-0.0284015	-0.0192593	-0.029572	-0.00308389	-0.0327282	0.0210008	0.00272901	0.00601987	0
102.6	0.017106	-0.0278706	-0.0237203	0.0218188	-0.0184179	0.00946861	0.00653687	0.00949631	0.0256439	-0.0317787	0
102.8	0.0151425	0.00948439	0.00149638	0.0352645	-0.00824709	-0.00343968	0.00804361	-0.00482305	0.0189705	-0.00634233	0
103	-0.0176846	0.0209985	-0.0142168	0.00231322	-0.0234994	-0.0154424	0.0199513	-0.0125591	-0.0189994	0.00593118	0
103.2	-0.0135401	0.000154732	-0.0163754	-0.0174351	-0.0254123	0.00150093	0.0408452	-0.00327338	-0.0544636	0.000964029	0
103.4	-0.0168315	0.0190884	0.00648801	-0.0168313	-0.0144257	0.0227554	-0.0385765	0.0189031	-0.00448323	0.0409168	0
103.6	0.0171423	-0.00571721	0.00532449	0.0312709	-0.0160109	-0.0309531	0.0141538	0.00371228	0.0319192	-0.0356517	0
103.8	0.0145918	-0.0320768	0.0155034	0.0513952	0.0419263	-0.0160756	-0.00371553	0.0492038	0.00960898	-0.0398118	0
104	0.00224056	0.00546147	-0.021076	-0.0213939	0.0289276	-0.0207915	-0.0199908	-0.00493822	0.00636974	-0.0532196	0
104.2	-0.00305918	0.0240423	-0.0108997	-0.0480298	-0.0212254	-0.0154898	-0.0161806	-0.0309486	0.0138069	0.00565871	0
104.4	0.00028215	0.00456763	0.019201	-0.00251838	-0.0154849	0.0124547	-0.00934525	0.0219298	0.0161444	0.0660795	0
104.6	0.0122312	0.0136127	-0.00388846	0.00160019	0.0038154	0.0133359	0.013881	0.0119191	0.0166348	0.0149737	0
104.8	0.00876614	0.0167382	0.0317858	-0.00810257	-0.0060075	0.0344593	0.0263251	-0.00562491	-0.0102145	0.0322252	0
105	0.00270296	0.0120076	-0.0107073	-0.0194706	0.0123505	0.00840002	0.0847693	-0.0170461	0.0136451	-0.0537255	0
105.2	-0.0083064	0.0369023	-0.00300545	-0.0210381	0.00955926	0.0176035	-0.0096594	0.0447172	0.01054	-0.0160329	0
105.4	-0.00741084	0.00508022	0.01398	-0.00324583	0.0161155	-0.00478313	-0.041191	0.0175954	-0.0139188	0.00339426	0
105.6	0.0145917	-0.0328549	0.0116342	0.0232656	0.0230776	-0.00435305	0.0111367	-0.046244	-0.0018442	0.00872518	0
105.8	0.0127777	-0.0171662	0.0170364	0.01967	0.0177134	0.016256	-0.0108677	-0.0291944	-0.00838782	0.0366217	0
106	-0.0302531	-0.0151823	0.00636798	-0.0155268	0.0198433	-0.0214681	-0.0440714	-0.00910011	-0.0336215	-0.00764294	0
106.2	-0.0253008	-0.0204569	-0.0204174	-0.00690021	-0.00394037	0.0251853	-0.00131885	-0.00110427	0.0606344	0.0163063	0
106.4	0.0121211	-0.023402	-0.0223621	0.0279115	-0.00553893	-0.000575189	0.00276404	0.0175664	-0.0478597	0.0151407	0
106.6	0.00374256	-0.00848426	-0.0233011	-0.025804	-0.0196801	-0.00109533	-0.0456165	-0.0547528	-0.0764374	-0.027788	0
106.8	-0.0177468	-0.000709359	0.00154702	-0.0391271	-0.00762187	-0.00546907	-0.0661535	-0.0295717	0.0208523	-0.0088666	0
107	-0.00246217	-0.0264729	-0.0120467	0.0145572	0.00221843	-0.0338003	3.24379e-05	0.0358942	0.0516949	0.0165484	0
107.2	0.0134695	-0.0258226	-0.0443652	0.0141017	-0.0237872	-0.027966	0.0552048	-0.00043423	0.00375239	-0.0213554	0
107.4	-0.00542451	0.0436359	0.0284795	-0.0211666	-0.0150835	0.00102626	0.012387	0.0189076	0.0180977	-0.00636403	0
107.6	0.0040293	0.0354358	0.0204553	-0.0206226	-0.00308034	0.0304193	0.0548133	0.0159891	0.0610041	0.0381505	0
107.8	0.024176	0.000753262	0.00840192	0.0188792	-0.00634309	0.00870031	0.014663	0.0104438	-0.0351382	-0.0295956	0
108	0.0233191	0.0222844	0.0240182	0.062166	-0.00533594	-0.0399284	-0.0291285	-0.0218515	-0.0488122	-0.0357424	0
108.2	0.00208253	0.0422288	0.00713249	0.0298191	-0.00766453	-0.00844921	-0.00101419	-0.0515264	-0.00766539	-0.00450552	0
108.4	0.00932308	0.0116264	0.000255543	-0.00581758	0.00478991	0.0506048	0.0159828	-0.0295754	0.00831977	-0.0101205	0
108.6	0.03945	-0.00657541	0.037825	0.0309357	0.0350708	0.0229267	-0.0113929	0.026206	0.0452143	0.0152168	0
108.8	0.0142969	0.0120214	0.0118587	0.00801238	0.0183211	0.000899108	0.00812922	0.0544969	0.0203427	0.0445814	0
109	0.00776396	-0.016526	0.0248327	0.0098439	0.0058817	0.00775925	0.0147733	0.0265378	0.00533842	0.0224217	0
109.2	-0.0113372	-0.00489484	0.0137678	0.0330978	0.00531997	0.0136511	-0.00451297	0.0276124	0.0228759	0.0145982	0
109.4	-0.00779521	-0.0155678	0.000642101	0.0324373	-0.00646464	0.0066933	0.013621	-0.0111545	0.0301024	-0.0128368	0
109.6	-0.00283838	-0.0220852	-0.013789	-0.00574295	-0.00035304	-0.0403153	0.0131901	-0.00871638	-0.0140877	-0.0162437	0
109.8	-0.0271122	-0.00585711	-0.00967684	-0.0288219	-0.001289	-0.0542672	-0.00749822	0.0359221	-0.0393245	0.0166193	0
110	-0.0307131	-0.0303821	0.0302582	-0.0174494	-0.0442961	0.0119496	0.037902	-0.0183157	-0.00670544	-0.00538687	0
110.2	-0.00798848	0.0072892	-0.0159849	-0.0526411	-0.0138746	-0.0195022	0.0341584	-0.0022664	-0.0460419	-0.0245824	0
110.4	0.0043266	0.0304855	-0.0133828	-0.0426686	0.00220498	0.0184281	-0.0119823	0.027326	0.0129927	-0.0119542	0
110.6	0.00168246	0.0204165	-0.0254779	-0.0145886	0.0165661	0.0215097	-0.0481963	-0.00776634	-0.0369256	-0.021862	0
110.8	-0.000898573	0.0227097	-0.0231984	0.00970273	-0.00778119	0.0198785	-0.0564115	-0.00310724	0.00268338	-0.0131594	0
111	0.00735137	0.0153616	-0.00220178	0.0143947	-0.0137732	0.0240487	-0.00694294	0.00777256	0.0638815	0.0237738	0
111.2	0.0072844	-0.0132188	-0.0161965	-0.013604	0.0278714	-0.0164154	0.0175336	-0.0311032	-0.0302851	0.0374809	0
111.4	-0.0121433	-0.00586466	-0.0191618	-0.0104543	-0.000134904	-0.0138782	-0.0531673	0.00273309	-0.0119088	0.0251818	0
111.6	0.00171995	-0.0148214	0.00568624	0.0731048	-0.000993213	0.0378607	0.0546131	0.0159154	-0.0395902	-0.0115965	0
111.8	-0.0142017	0.00929609	-0.0110655	0.0157943	0.00228513	-0.0112492	0.00368901	0.0662048	0.0112647	-0.02343	0
112	-0.013836	-0.00176075	0.0102482	-0.0129545	0.00970379	-0.00512094	-0.0222871	0.00345754	0.0336799	9.96581e-05	0
112.2	0.00126602	-0.00870052	0.0330506	-0.00587995	-0.0103977	0.0109786	0.0128016	-0.0523237	0.00664249	0.0143574	0
112.4	0.0152874	0.0198483	0.0171997	-0.0259221	-0.0229438	-0.0247999	0.00650026	-0.0387329	0.00560829	-0.00753284	0
112.6	0.0261843	0.019344	0.0249561	-0.0109465	-0.000871894	0.00262337	-0.00386577	-0.0601133	0.0233889	-0.0200389	0
112.8	-0.00544424	0.00757183	0.0252008	-0.0155394	-0.0351996	0.0308147	-0.032722	-0.000444434	0.0356552	0.0222384	0
113	0.0137032	-0.00256645	-0.0290433	-0.0283095	0.0098792	-0.0465713	-0.000132214	-0.00192509	0.0234595	0.0415226	0
113.2	0.0252614	-0.0366448	-0.000674898	-0.0182014	0.0130765	-0.00860301	-0.0247405	0.0372979	-0.0294165	0.0215306	0
113.4	0.000111523	-0.0535143	0.00658264	0.029019	0.0171621	-0.00647187	-0.0172069	0.0159981	-0.0623828	-0.0215912	0
113.6	-0.0176396	-0.020489	-0.0314072	0.0344225	0.0404754	-0.0209051	-0.0037088	-0.0123737	-0.00787726	-0.0219624	0
113.8	0.000156899	0.0304563	-0.0236159	0.00526639	0.034947	0.0292937	-0.00325207	0.027212	0.0588913	0.0194907	0
114	0.0214293	0.0383384	0.00676582	0.0297736	0.0234994	-0.00405674	0.0756742	0.0223984	0.0179876	0.0097276	0
114.2	0.00913972	-0.0101596	0.0215452	0.00275088	0.00954273	-0.0015851	0.0535367	0.0455139	-0.0305292	-0.0338119	0
114.4	-0.0187988	-0.00692928	0.000455902	-0.00770166	0.0238063	0.03703	0.0553667	-0.00565582	-0.00163642	-0.0427987	0
114.6	-0.0205129	-0.0184273	0.000259991	0.0129046	-0.0278308	0.0115278	0.0334591	-0.0439584	-0.00719389	-0.0234659	0
114.8	-0.0120419	-0.0132677	-0.006756	0.00873474	-0.0387654	0.0124605	-0.0370994	-0.0157042	-0.0423557	0.000324711	0
115	-0.0244045	0.0216408	-0.00732351	-0.0259525	-0.0174293	0.0228217	-0.0687563	0.00175714	-0.00825478	0.0274815	0
115.2	-0.0334218	0.0180204	0.0100986	-0.0323453	-0.0337707	-0.0316116	-0.0312405	-0.0162958	0.0306049	0.0135118	0
115.4	-0.00670022	-0.000639966	-0.0176041	0.00257197	0.0127187	-0.0233221	-0.00870922	-0.00275335	-0.0506792	-0.0590857	0
115.6	0.00370942	0.0158616	0.0174771	0.00397897	-0.0384828	-0.00756498	-0.0128681	-0.0216208	-0.0553469	-0.0151366	0
115.8	0.00607488	-0.00466366	-0.00654047	-0.0409643	-0.0127805	-0.0354705	-0.0406837	-0.00337894	-0.0145217	-0.0119908	0
116	0.00899415	-0.0166283	-0.0364865	-0.00781111	-0.00322258	-0.0629011	-0.0181846	0.00801744	0.0257716	-0.00550578	0
116.2	0.0130526	0.012111	-0.003068	0.0328526	-0.00387043	-0.0272692	0.0285584	-0.035712	0.00548378	0.0277565	0
116.4	0.00391476	0.0112576	0.0202406	0.0132251	0.0185948	0.0343962	0.00437158	-0.0422572	-0.0176522	0.0596998	0
116.6	-0.0102876	-0.0421193	-0.00781498	0.00291821	0.00658683	0.0362267	-0.0361925	0.0197417	0.0223081	0.0606634	0
116.8	0.00994672	-0.0324661	0.0106578	-0.0170363	0.0372952	-0.00373361	0.0462017	-0.00384128	-0.00139848	-0.02513	0
117	-0.00203379	0.0299427	0.00103008	0.0391884	0.0282077	-0.0191228	0.0530684	0.0232647	0.0401697	0.0205236	0
117.2	-0.0119735	-0.00846595	-0.0114016	0.0214075	0.0377931	0.0276864	-0.0170738	0.0273428	0.0111335	0.0414513	0
117.4	-0.0116334	-0.0398938	0.000539018	-0.0260021	0.00998018	0.0144557	-0.00331841	0.00522138	-0.0161528	0.0138068	0
117.6	-0.0157368	-0.0169047	-0.0102554	-0.0231417	-0.0408438	0.00884501	0.0208143	-0.014579	0.00177463	0.0185398	0
117.8	-0.0146227	-0.0121935	-0.0217179	-0.00790032	-0.029139	0.0477412	-0.0198132	-0.0130954	-0.0247102	0.00890792	0
118	0.00525066	0.00659946	0.0219599	-0.0110321	0.00565752	-0.0172477	0.00264286	0.0300735	-0.0684738	-0.0531344	0
118.2	0.0229966	0.0395759	-0.00956819	-0.00424864	0.00372578	-0.0191417	-0.0117335	0.035089	-0.0311401	-0.0210454	0
118.4	-8.94489e-06	0.00367833	-0.010929	0.0430951	0.00670631	-0.024235	-0.039354	-0.00306291	0.0154595	-0.0159184	0
118.6	-0.022825	-0.00280797	0.00626884	0.0259381	-0.0105946	0.00229645	0.00274487	-0.0319367	0.0371466	0.0226236	0
118.8	0.0289292	0.0129776	0.0114902	-0.030449	-0.0110883	0.0268332	0.0145916	-0.0233812	0.0225567	-0.00413329	0
119	0.0530123	0.0160973	0.0245988	-0.0152701	0.0130472	0.0332459	-0.0054842	-0.019452	0.0319913	-0.0470257	0
119.2	-0.0248271	0.0255441	0.0206299	0.0190374	-0.00697778	0.024715	0.0365829	-0.0431438	0.0394967	0.00570521	0
119.4	-0.0142095	0.0130564	-0.0251988	-0.0392997	-0.0515512	-0.0449229	0.042803	-0.0213342	-0.0598421	-0.0360482	0
119.6	0.0550727	0.00244734	0.030116	-0.00447105	-0.00992297	-0.0202266	0.000614745	0.0625705	0.00921337	-0.0519313	0
119.8	0.0283312	-0.0105415	0.00976225	0.00500515	0.013898	0.0285459	-0.00823665	0.082839	0.0592843	-0.00278787	0
120	0.000119807	0.0103195	-0.00905737	0.0149165	0.0133201	0.0201011	0.00412988	0.031054	0.0480703	0.0287273	0
120.2	-0.015062	0.0357579	0.0110632	0.00973748	0.0125847	-0.0043761	-0.0178989	-0.00798208	0.0232234	0.0196543	0
120.4	0.00147535	0.0181731	0.0127499	-0.0242646	0.00361966	0.0150283	-0.0317744	0.0215774	0.0453387	0.0399226	0
120.6	0.0782132	-0.0100169	0.0224816	0.00805051	-0.018098	0.0469322	0.00250239	0.0471109	0.0806291	0.0779537	0
120.8	0.0102587	-0.00551109	0.0386834	0.0714728	-0.037457	0.0342491	-0.0162464	-0.0226469	-0.0376644	0.0245992	0
121	-0.00310917	0.00799943	0.019108	0.0452978	0.0133931	0.015569	-0.00713124	0.0364976	-0.000772219	0.0360124	0
121.2	0.0394366	0.0114711	0.0613288	0.0337621	0.0294315	0.0239234	-0.00822221	0.00405211	0.0375374	0.0875895	0
121.4	0.088955	0.00170024	0.0680684	0.0361462	0.0208253	0.0378287	0.0348608	0.0408748	0.0609638	0.0600078	0
121.6	0.062477	0.0165173	0.0401514	0.014936	0.0231816	0.0223387	0.0689784	0.12093	0.0552369	0.0368434	0
121.8	-0.000163063	0.0272575	0.0403999	0.00218323	0.0040665	-0.000959284	0.0172168	0.0520439	0.00989328	0.052736	0
122	0.0443973	-0.0151207	0.0136208	0.0207963	-0.0166033	0.0116046	0.00766984	0.0175843	0.0499548	-0.014084	0
122.2	0.0431127	0.0314109	0.0699751	0.0540643	0.0265583	0.0212906	0.0631589	0.0284813	0.0596672	0.0354238	0
122.4	0.0584572	0.0235116	0.041589	0.0448784	0.0168676	0.0378842	0.000477354	-0.0122808	0.0765099	0.0444791	0
122.6	0.0655183	0.0522692	0.0400096	0.0151584	0.0578796	0.0648349	0.0216986	-0.0254155	0.0146124	0.0263265	0
122.8	0.0483781	0.0601939	0.0603645	0.0014736	0.0475054	0.0661517	0.0261614	0.0344867	0.00920535	0.00900919	0
123	0.0749911	0.0475826	0.0548891	0.0576185	-0.0104403	0.0663396	-0.00919902	0.0588727	0.0710211	-0.00593265	1
123.2	0.124574	0.103063	0.0787567	0.142068	0.0463753	0.086531	0.0877156	0.0486996	0.0457123	0.0180343	1
123.4	0.095733	0.102274	0.104144	0.108139	0.0773431	0.0724505	0.110726	0.136098	0.0424083	0.0617083	1
123.6	0.150263	0.150534	0.117725	0.104883	0.0424348	0.13029	0.0349325	0.0651251	0.0423613	0.047484	1
123.8	0.0999692	0.161649	0.114995	0.158342	0.0349546	0.13745	0.0437613	0.0818908	0.101321	0.0436767	1
124	0.0800268	0.127938	0.0987435	0.154357	0.0191606	0.0970531	0.0595355	0.0560229	0.0821018	0.0713307	1
124.2	0.116109	0.0989042	0.0972005	0.0685095	0.0109043	0.061526	0.0670472	-0.0173251	0.00785931	0.0589351	1
124.4	0.0959644	0.093857	0.105986	0.0213733	0.0196644	0.0322097	0.100756	0.0215962	-0.00713105	0.0126828	1
124.6	0.0637028	0.0843165	0.106374	0.0639495	0.00893145	0.0238889	0.0639899	0.0898652	0.00455849	0.0269902	1
124.8	0.0332776	0.0330756	0.13286	0.0567469	0.0634105	0.050722	-0.0219123	0.0761189	0.0258683	0.045771	1
125	0.0421486	0.0516264	0.0946198	0.0168154	0.0320847	0.0238391	-0.026638	-0.012097	-0.0241304	-0.0596572	1
125.2	0.0513382	0.0580606	0.073652	0.0347032	0.00440767	-0.00397711	-0.00771219	0.0378982	-0.0216117	-0.0886452	1
125.4	0.00896813	0.00207973	0.0511798	0.022221	0.0141456	-0.0108231	0.0207487	0.0230375	0.0327064	-0.058993	1
125.6	-0.0286481	-0.0230078	0.027183	-0.025425	-0.0243419	-0.00785618	0.015896	-0.0618358	0.00624968	-0.0721641	1
125.8	-0.0111921	0.0176564	0.0348817	-0.0311239	-0.0682174	-0.0288112	-0.0160125	-0.0278705	-0.0522476	-0.0948904	1
126	-0.0127008	0.0132972	0.0173616	-0.0374866	-0.00678043	-0.0730418	0.0141429	-0.0270411	-0.00367545	-0.0992665	0
126.2	-0.0321396	-0.0148658	0.00777656	-0.0105937	-0.018057	-0.000549648	-0.0483661	-0.0244291	-0.0668426	-0.102631	0
126.4	-0.0128976	0.0231225	-0.00903119	-0.0271927	-0.0183833	-0.0471443	-0.0257847	0.00424237	-0.0968797	-0.0966497	0
126.6	-0.0133669	0.0175359	-0.0112249	-0.00778569	0.000372492	-0.0522369	0.00214634	0.0174049	-0.0485469	-0.0788166	0
126.8	-0.0248647	-0.020422	-0.0357804	0.0278593	-0.0048866	0.00865852	-0.00597233	-0.0410219	-0.0288037	-0.0881877	0
127	-0.0257695	-0.0195508	-0.0390191	0.00954061	-0.0307937	0.0062183	-0.00228211	-0.0689943	-0.0536983	-0.0846106	0
127.2	-0.0391781	-0.0198252	0.0150008	-0.0245812	-0.0372164	-0.0325614	-0.00944486	0.0017583	-0.0377949	-0.038085	0
127.4	-0.0357371	-0.0282711	-0.0258716	-0.0364608	-0.0126741	-0.0539212	-0.0264388	-0.0135873	-0.0177153	-0.0555413	0
127.6	-0.0420383	0.0108825	-0.0293531	-0.0435444	-0.0164413	-0.069122	0.00688368	-0.0168102	-0.0758673	-0.0263128	0
127.8	-0.0342635	-0.014265	-0.0145009	-0.00997615	-0.00918957	-0.026245	-0.0321765	-0.0599696	0.00422884	-0.0424379	0
128	-0.021254	-0.0420808	-0.0287372	-0.0117188	-0.000746233	-0.0187438	-0.0421752	-0.0584545	-0.0218669	-0.0621756	0
128.2	-0.013575	-0.0195932	-0.0293431	-0.0495868	-0.0013077	-0.0352991	-0.0128398	-0.0210544	-0.0825773	-0.0574933	0
128.4	-0.017911	-0.00469378	0.000602257	-0.0308585	-0.0153976	-0.0306954	-0.0271704	-0.0196977	-0.00144457	-0.0579077	0
128.6	-0.0342085	-0.0245432	0.00367987	-0.000321365	-0.0371102	-0.0557757	-0.035982	-0.0094601	-0.00525526	-0.0380878	0
128.8	-0.0220744	-0.0464757	-0.00580874	-0.0788718	-0.00493341	-0.0309923	-0.032706	-0.00788286	-0.0092007	-0.0118092	0
129	-0.0260825	-0.0279598	-0.0268535	-0.022114	-0.0395013	-0.02685	0.00344454	-0.0125648	-0.0374288	-0.00154113	0
129.2	-0.00858938	-0.0219139	-0.0115769	0.0045006	-0.0524957	-0.0470903	-0.0276715	-0.0374257	-0.0623284	-0.0262244	0
129.4	-0.013142	-0.0669403	-0.0202508	-0.0506402	-0.0214206	-0.0268126	-0.0257712	-0.0698265	-0.0402723	-0.0765431	0
129.6	-0.0487677	-0.061385	-0.0488751	-0.0555938	-0.01365	0.0108217	0.00536779	-0.0670154	0.0292026	-0.0663293	0
129.8	-0.0418622	0.0162393	-0.0344476	-0.00825358	-0.0394154	0.000282648	-0.0146067	-0.0588115	0.0694172	0.00163894	0
130	-0.00975082	-0.00216479	-0.0336672	0.000917319	-0.0374093	-0.0107178	0.0364138	-0.0756114	0.0128287	-0.00395323	0
130.2	-0.0320339	-0.0272767	-0.0338088	0.0431786	0.0178572	0.0217249	0.0503921	0.0526015	-0.0177431	0.011304	0
130.4	-0.0219232	-0.0133175	0.0237372	0.00720035	-0.0523676	-0.00290856	0.00520525	0.0554957	0.00618186	-0.021024	0
130.6	-0.0119195	0.026853	0.0125027	-0.0134145	-0.028813	-0.00550838	-0.00851917	0.0611209	-0.0219845	-0.0198332	0
130.8	-0.00137146	0.0542919	-0.0337017	0.00442685	0.0409423	0.0133136	-0.0159755	0.0450522	-0.0352613	0.0401441	0
131	0.0145458	0.0348517	-0.00388533	0.0116682	0.0139046	0.0236401	-0.0245145	-0.0175375	0.0213772	0.049564	0
131.2	0.0109913	-0.00460338	0.0429391	0.0177519	0.00203041	0.0494218	0.0195765	0.0197463	0.0101795	-0.00242498	0
131.4	0.0376642	0.00457027	0.0337966	-0.00126324	0.00313717	0.0181604	0.0219918	0.0160965	-0.0566328	0.012846	0
131.6	0.0115931	0.00955244	0.0265846	0.0108841	0.0375541	-0.00286539	-0.00233002	0.0418539	0.0528697	0.00779089	0
131.8	0.00531704	0.0236395	0.00156669	0.0326438	0.0288367	-0.0143162	-0.00821702	0.00921558	-0.0109364	0.0370266	0
132	0.0170522	0.0265091	-0.015197	-0.00298927	0.0279797	0.00274658	-0.0115471	-0.000250321	-0.0233102	0.0156435	0
132.2	0.0298573	0.0124344	0.0157394	-0.0111786	0.025847	0.0172964	-0.00218458	0.0018898	0.0444729	-0.00923348	0
132.4	0.0419369	0.00795209	0.0363992	0.0295968	0.000751384	-0.01131	0.0203576	-0.0350007	-0.0318496	0.0298359	0
132.6	0.0132387	-0.00289459	-0.0143071	-0.00636978	0.0159754	-0.0365402	0.00431303	-0.0065604	-0.0567297	0.0111388	0
132.8	-0.0275897	-0.0430071	-0.0349689	0.0136427	-0.0156625	-0.0209469	-0.0147983	0.0164326	0.00678356	0.0040597	0
133	0.000238048	-0.00882818	-0.0576309	0.0246395	-0.0079387	0.0286881	-0.00557139	-0.00344604	-0.0202119	0.000167054	0
133.2	-0.00518648	0.0044698	-0.0261308	-0.0165407	0.0330299	0.0111616	0.00113661	0.00720491	0.0218949	-0.0135609	0
133.4	-0.0244308	-0.00904589	0.0032661	-0.0394719	0.00969286	-0.0202068	0.00588077	-0.0139717	0.0834653	-0.0366318	0
133.6	-0.0168511	-0.00574745	0.0099406	-0.0289045	-0.0214016	-0.0117548	0.0443416	-0.0168769	0.0322503	-0.036236	0
133.8	-0.00842678	-0.0096781	0.0255029	-0.0159644	-0.00643003	-0.00920986	0.0639069	0.0484608	-0.0277253	-0.0062573	0
134	0.0231295	-0.013188	-0.00213262	0.0191513	-0.0574797	-0.00253698	-0.00945852	-0.0192941	0.013703	0.000901766	0
134.2	0.0100311	0.00148354	0.0435978	-0.0177949	0.00876078	0.00942071	0.00229129	-0.0410176	0.0428125	0.0180433	0
134.4	0.00390468	-0.00999196	0.00847694	-0.00468388	-0.00413711	0.0231756	-0.0178466	0.0105242	0.0299519	0.0151247	0
134.6	0.0211797	0.0113211	0.01236	0.0122043	0.00616837	0.00460428	-0.0395549	-0.00296995	0.00534871	-0.0128099	0
134.8	0.00765485	-0.00617409	0.0233004	-0.00592359	0.0136928	-0.00905428	-0.0240622	-0.00742952	-0.0204873	-0.0162347	0
135	-0.0181149	-0.0440378	-0.0209416	0.003065	-0.0175554	-0.00802107	0.00145699	0.0283761	-0.0326448	0.0163544	0
135.2	0.00781193	0.0215607	-0.00634695	0.0304668	0.0241558	-0.0245037	0.0150259	-0.0116511	-0.0207713	0.0213139	0
135.4	0.0133889	0.0144494	-0.0138939	-0.00992287	-0.0120825	0.00580908	-0.0263268	0.00492435	-0.025481	-0.0171429	0
135.6	-0.00791146	0.0195929	-0.00172757	-0.0271807	0.00501902	-0.00872078	-0.0496478	-0.00947812	-0.0120767	-0.00160627	0
135.8	0.0204335	0.00311454	0.0146422	0.0198812	0.0232681	-0.00998491	-0.033512	-0.00508212	-0.0343008	-0.00490392	0
136	5.24616e-05	0.0385503	0.0133017	0.0162351	0.0342068	0.0164329	0.0113168	-0.00391814	-0.0334584	-0.00999117	0
136.2	-0.0186069	0.0614234	-0.00548353	0.00073417	-0.000634871	0.018328	0.0334953	-0.01903	0.0140875	0.0227341	0
136.4	0.0240796	-0.00761619	-0.0208693	0.0352968	-0.0377207	-0.0010435	0.0240172	0.00723521	0.0294699	0.0438162	0
136.6	-0.026669	-0.0264976	-0.018187	0.0117873	0.0395055	0.0173945	0.0164381	0.0284982	0.00314709	0.0267768	0
136.8	-0.02835	-0.0393088	-0.0232129	0.0282785	-0.0109759	0.0445607	-0.0497825	-0.0705772	0.00395846	0.0263034	0
137	0.00804865	0.00843919	0.0156485	0.000330743	-0.00854082	-0.0273842	0.0108769	-0.0279075	-0.00629748	-0.0286708	0
137.2	0.0113973	0.0164111	0.00869226	-0.00545731	-0.0187579	-0.0187942	0.0225616	-0.0062122	-0.0111175	-0.0303923	0
137.4	3.27811e-06	-0.0325569	0.00494739	-0.00310053	-0.0353294	0.0147998	0.028581	0.00106572	0.00597531	-0.0110943	0
137.6	0.00610216	-0.0432859	0.011531	-0.0391278	-0.00327411	-0.0049633	0.0632141	0.044332	-0.00532984	0.00363867	0
137.8	-0.000902736	-0.00554307	-0.0352458	-0.0402738	0.0158389	-0.000396219	-0.00894829	0.0178295	-0.0450801	0.0261089	0
138	-0.0268526	-0.00274427	-0.0129686	0.0206855	0.00504278	-0.024256	-0.0533472	-0.00472969	-0.0161255	-0.049163	0
138.2	-0.00626242	-0.00324264	0.0254315	-0.00611309	-0.00252526	0.00828395	-0.0103459	-0.00463557	0.0076992	0.00380328	0
138.4	0.00385471	0.0103721	0.014547	-0.0379572	0.0340956	0.0252737	0.0129607	-0.00630612	0.0307513	-0.016377	0
138.6	0.00856427	0.0200665	-0.0190869	-0.0256403	0.0016746	0.0176122	-0.006484	-0.0536061	0.0479539	-0.00571207	0
138.8	0.019659	0.00888718	-0.027524	-0.00736731	-0.0145787	0.0174039	-0.0049469	-0.0311531	0.0508469	0.0386498	0
139	0.00732341	-0.00641803	-0.0030046	0.00880828	0.0319231	0.0100505	0.00910305	0.0472667	0.0425008	0.0158013	0
139.2	-0.0121064	0.00124698	0.0226177	0.0372849	-0.012687	-0.0119894	-0.003221	0.010134	0.02277	0.00744557	0
139.4	0.0155374	0.0168259	0.0101717	0.0250793	-0.0225594	0.00319158	0.0310181	0.0292285	-0.0035382	-0.0137723	0
139.6	-0.0144975	0.0190386	-0.0112814	-0.000150951	-0.0137571	0.0160962	0.00794474	0.0717391	-0.0313206	-0.0198192	0
139.8	0.0103675	0.00886706	0.00580295	0.0125972	0.024264	-0.0050185	-0.0360034	-0.0274508	0.0200275	-0.04033	0
140	-0.000391801	-0.00871135	0.0313511	0.0300168	0.0145522	-0.0423844	-0.0384607	-0.00237598	0.0246214	-0.00392755	0
140.2	-0.0232278	-0.0102447	0.0298286	0.0162011	-0.0257339	-0.0383866	-0.0131143	0.05985	-0.0357343	0.0415019	0
140.4	0.0393621	0.0125309	-0.0057265	-0.00176193	0.00145725	-0.00549776	-0.0163979	-0.0526901	-0.0568969	0.00396774	0
140.6	0.0113257	0.0183743	-0.0507159	-0.000453573	0.0463772	-0.0145992	-0.0480071	-0.0099005	-0.067483	-0.00595844	0
140.8	-0.0563935	-0.00261824	0.00037325	-0.00635943	0.0384838	0.00801888	-0.0195771	-0.0187372	0.00989001	0.0145	0
141	0.00224366	-0.0082814	0.0331278	-0.0138856	0.0210969	-0.00930683	0.000724883	-0.0204194	0.00992251	0.00114938	0
141.2	0.0277105	-0.0326359	-0.00567785	-0.00199911	-0.00541194	-0.00500127	0.00377058	-0.0100999	-0.0494422	0.0114225	0
141.4	-0.00326313	-0.0401337	-0.0401047	-0.0179365	-0.0302117	-0.00353516	0.0297094	0.0301363	-0.0538812	0.00718706	0
141.6	0.000136376	-0.00221556	-0.0130469	-0.0173886	-0.0197107	-0.0321514	0.0331773	0.0444658	0.0396679	0.00964767	0
141.8	0.00776403	0.0210882	0.0313329	0.047719	0.0121098	-0.0147832	-0.0252537	-0.0234834	0.10165	0.0519795	0
142	0.00822355	0.0108535	0.0372694	0.0143686	0.0119263	0.0271417	-0.0245635	-0.0064052	-0.0142038	-0.0402442	0
142.2	0.0117393	-0.00986679	0.0210602	-0.022842	-0.00226457	0.0251985	0.038439	0.0379182	0.0059935	-0.0564137	0
142.4	-0.00254992	0.00561552	0.00928998	-0.000957197	-0.0136906	0.00602798	0.0465485	-0.0223942	0.00433837	-0.0590169	0
142.6	-0.0125063	0.0350413	0.00441878	0.0304845	-0.0596756	0.0151295	0.0203004	-0.0239218	-0.0299826	0.0040329	0
142.8	-0.00820147	0.0256743	0.0042684	0.0185783	-0.0587195	0.0154311	0.0151765	-0.00852822	-0.0344127	0.0409002	0
143	-0.0225621	-0.0151675	-0.00874346	-0.0106346	0.0153716	-0.00438156	0.0112965	-0.047216	-0.0114172	-0.0160788	0
143.2	-0.0503293	-0.023198	-0.0380502	-0.0097045	0.0273451	0.0021034	-0.0212063	0.0159003	0.0406168	-0.00955971	0
143.4	-0.0221468	0.0120948	-0.0221239	-0.0113041	0.0161862	-0.0264221	-0.0498106	0.00475744	0.0446422	-0.0217704	0
143.6	0.00907256	0.0184565	-0.0103795	-0.0371317	-0.0319987	-0.0249278	-0.00268304	-0.0133072	0.0203281	0.0536587	0
143.8	0.0163971	0.0348777	0.000121919	0.00638972	0.00768124	0.0247454	0.0673359	-0.0207134	0.0280064	0.0369786	0
144	0.0270969	0.0263004	0.00164496	-0.00303432	0.0370366	0.00249732	0.0476677	0.045621	0.0323049	-0.00541858	0
144.2	0.0333283	-0.0272431	0.0031022	-0.0421132	-0.00216196	-0.0428423	0.00821583	0.0803169	-0.00252228	0.0114505	0
144.4	0.0123398	-0.050795	0.0191463	0.0050413	-0.00458268	0.00907393	0.022947	-0.0114381	-0.0349548	-0.00776217	0
144.6	-0.00492727	-0.0166563	0.0137781	-0.00615412	0.0176267	0.0255354	-0.0326067	-0.0173721	-0.0221079	-0.0319075	0
144.8	-0.0175885	0.0140122	-0.001918	0.0447671	0.0419766	-0.0108747	-0.0322095	0.012715	0.0210979	-0.00792699	0
145	0.00208081	-0.00166177	-0.007049	0.0450233	-0.0212223	0.0188912	0.0128527	0.0141024	-0.0161253	-0.00807654	0
145.2	0.0158698	0.00131851	0.0212793	0.035545	-0.0335677	0.0384261	-0.0052511	-0.0236524	-0.0558357	0.000868724	0
145.4	-0.017265	-3.23354e-05	0.0564671	0.00358994	-0.00514548	0.00853569	-0.0067506	-0.0473686	-0.0377358	0.0256054	0
145.6	-0.0126128	-0.0278444	0.0321121	-0.036612	-0.026579	-0.00113316	0.0201526	-0.0182292	-0.0283765	0.036821	0
145.8	0.0527454	-0.0208138	-0.0357071	-0.00158013	-0.0263604	0.00271529	-0.0417308	0.0250917	-0.0349889	0.0144164	0
146	-0.0130146	-0.000193158	-0.0315126	-0.000994188	0.00936163	-0.0386756	-0.0550569	0.0276017	0.0306538	-0.0619225	0
146.2	-0.015124	0.0326128	-0.0172129	0.000823144	-0.0372161	0.00816832	-0.0141481	0.00689467	0.0180451	-0.0289023	0
146.4	0.0113759	0.0314599	0.00982647	-0.035914	0.0181976	0.044609	0.0242615	-0.00175264	0.0104932	-0.0143633	0
146.6	0.00354761	-0.0253866	-0.00352011	-0.0355933	0.0206093	0.00325035	-0.00378666	0.0283401	0.0203256	0.0231243	0
146.8	-0.00540044	-0.0247464	-0.0168529	-0.0222171	-0.0285147	-0.0158643	-0.0334265	0.0214003	0.0247388	0.0568048	0
147	0.00664664	0.0437116	0.0226001	-0.0254701	0.00211254	0.0234549	0.0179561	-0.030903	0.025997	-0.0026563	0
147.2	0.00907733	0.0180843	0.0182398	0.0362529	-0.0255981	0.00906686	0.0614973	-0.0131371	0.00855319	-0.0400802	0
147.4	0.0136736	-0.00471131	-0.0217296	0.0141958	-0.0135017	-0.0158406	0.0013856	-0.0119876	0.019913	-0.0128291	0
147.6	-0.000388964	-0.00495528	0.0127254	0.0263545	0.0625058	0.00667359	-0.0386383	0.000743555	0.032624	0.0245067	0
147.8	-0.0109228	0.00978714	-0.011827	0.00203097	0.0505782	0.0118726	0.014037	0.0122475	0.0112425	0.0211743	0
148	-0.0140687	-0.00110989	-0.0182223	-0.0180326	0.0240135	-0.00308298	0.0493819	0.0485522	-0.0120376	0.00311649	0
148.2	-0.0142705	-0.0178053	0.0157314	0.00252302	0.016019	-0.00797341	0.0105169	0.0296297	0.0155947	-0.016049	0
148.4	-0.00983563	-0.0151747	-0.0272698	-0.000762886	-0.0246933	-0.0177514	-0.015761	-0.0502356	0.0434292	-0.0290048	0
148.6	-0.00898942	-0.0421966	-0.0304206	0.0102376	0.0232895	-0.0278394	5.75517e-05	0.0286968	-0.0198343	0.00559061	0
148.8	0.0113705	0.00597069	-0.014444	0.00840082	-0.0045487	-0.0103078	0.0123351	0.0235965	-0.0373026	-0.00662917	0
149	0.00186567	0.0225073	-0.00667356	0.00399394	0.0272335	0.0240378	0.00782953	0.000278755	-0.0276487	-0.00240269	0
149.2	-0.00932437	0.0102786	0.00453132	0.00344452	0.0264231	0.0133199	0.00687963	0.0242533	-0.00302437	-0.0194627	0
149.4	-0.00388499	0.00518762	0.0123969	0.00851415	-0.0169652	0.0114461	0.00142515	0.013731	-0.0256967	-0.00613454	0
149.6	0.0011656	0.0071493	0.0142207	-0.0106152	-0.0142679	0.0119748	-0.00320848	-0.0202087	-0.0486158	0.0276915	0
149.8	0.000910969	0.000100258	0.0145557	-0.0198148	-0.0121492	-0.048008	0.00967309	-0.00743628	0.0448656	-0.0208973	0
150	-0.00881246	-0.0423365	-0.0154479	0.0795739	-0.027704	-0.00322198	-0.0146384	-0.0763666	0.073853	0.000885143	0
150.2	0.0143263	0.0133758	-0.00405893	-0.0260787	-0.0472262	0.00331632	-0.0502866	-0.0725674	-0.00936884	0.00275117	0
150.4	0.0215784	0.00637203	0.00229437	-0.00135904	-0.0440226	0.00141537	-0.0355912	-0.0519862	-0.036129	0.0429054	0
150.6	0.00622051	-0.00257614	0.0127174	0.0498309	-0.0138832	-0.0227209	0.0363079	0.0240981	-0.0403504	0.0611746	0
150.8	0.00611615	0.0384509	0.0220528	-0.00819993	0.0289177	-0.0209403	0.0315223	0.0592604	-0.0223431	0.00170173	0
151	0.00875297	0.0245263	0.0013233	-0.0290003	0.0324659	0.0181087	-0.0338319	-0.0315449	0.0343043	-0.0272631	0
151.2	-0.0193299	-0.00755326	-0.00291749	-0.0316081	-0.015291	-0.0289078	0.0378068	-0.021291	0.00211394	0.0254779	0
151.4	-0.010857	0.0359989	0.0209471	-0.0138354	0.0220853	-0.0105804	0.03069	0.0564972	0.00448216	-0.00746937	0
151.6	0.0323946	0.00498174	0.0280263	-0.0206054	0.00669416	0.00647321	-0.0131932	-0.00418618	-0.016484	-0.0226331	0
151.8	0.0300247	1.29691e-05	0.00980023	-0.0361147	0.0298863	0.0273438	-0.00322795	-0.0121353	0.00216199	-0.0254956	0
152	-0.00289648	0.00723441	0.0143373	-0.0127807	0.032075	0.041708	-0.0161211	0.0578191	0.0241878	-0.0242003	0
152.2	-0.00894345	-0.0191813	0.0310151	0.0164688	-0.0264358	0.0137651	-0.0450915	0.0496328	-0.000775739	-0.00493161	0
152.4	0.00258883	-0.0149344	0.00238535	0.00382568	-0.0158751	-0.0122013	-0.0183131	-0.00891286	0.00174517	0.0149916	0
152.6	0.00541402	-0.0187132	-0.0314704	0.0167489	0.0156808	0.0217883	-0.0395666	-0.0103534	0.0245291	0.0232567	0
152.8	-0.00306256	-0.013551	-0.0205508	0.0490949	0.0196387	0.0177734	0.0179892	-0.0344418	-0.0496164	-0.0200528	0
153	-0.0303253	-0.0361938	-0.0275786	0.010423	0.000220252	-0.0139761	0.0122975	-0.001319	-0.0189895	0.00630494	0
153.2	-0.0130011	-0.0353573	-0.0351886	-0.0151656	-0.0253657	0.0148333	-0.0066143	-0.018778	0.0178677	0.0131481	0
153.4	0.00592611	0.00792069	-0.0125733	-0.00488606	-0.0202319	0.0155479	0.005854	0.0108398	0.0166714	-0.00482166	0
153.6	-0.0199216	0.0156735	-0.00131314	-0.00445183	0.0155363	-0.0510118	0.0167287	0.0784173	0.0314693	0.0308687	0
153.8	-0.0198745	-0.0213297	-0.0102305	0.00523638	0.0278823	-0.0361037	0.0447835	-0.0430034	-0.00233453	0.0480896	0
154	-0.0163098	0.0146035	0.0399657	-0.0128724	0.00938554	-0.0114866	0.0356897	-0.0321001	-0.00966713	0.00499166	0
154.2	-0.0029698	0.0194914	0.0267877	-0.0114141	-0.0292243	-0.0287979	-0.0125433	-0.0354377	0.0107463	-0.0421511	0
154.4	-0.00233079	0.0190196	-0.0253593	9.88762e-05	-0.0355962	-0.00579015	-0.016351	-0.00375569	-0.00939999	-0.0092697	0
154.6	0.028357	0.0244372	-0.0233998	0.00674894	-0.02	0.0077999	-0.0234729	0.0379377	-0.0057384	0.0132394	0
154.8	0.0423492	0.0157	0.0165865	0.007831	0.00440091	-0.0161298	0.00806602	0.00394635	0.00373057	-0.00391976	0
155	-0.00302848	0.00137369	0.018512	0.00659176	0.0160292	0.00716783	0.0595913	-0.0302823	-0.0440466	-0.00940588	0
155.2	-0.00120351	-0.00337293	-0.00853612	-0.00471141	-0.0197241	0.0610854	-0.0451587	0.0257433	-0.0324373	-0.0219682	0
155.4	-0.0296037	0.00794037	-0.0184942	-0.0542017	0.00955426	0.0317478	0.0151902	0.000522212	0.0226824	0.0617067	0
155.6	-0.0240467	-0.0251602	0.00384151	-0.0346365	0.0108687	0.00503315	0.00130981	-0.0421209	-0.00211707	-0.00466939	0
155.8	0.00282983	-0.012977	0.0129467	0.00765003	0.00521104	0.00874639	0.0280328	-0.011958	-0.0263288	-0.0278878	0
156	0.0038874	0.00182861	-0.00309111	0.0314841	0.00893695	-0.00466935	0.0278647	0.0146845	0.00297994	-0.00183026	0
156.2	0.000822048	-0.00456687	-0.0214326	0.0453308	0.00451088	-0.0263015	-0.0690758	-0.00315043	0.0223094	-0.0279101	0
156.4	0.00677825	0.0152707	-0.0243506	0.0273627	0.000747945	-0.00543381	-0.0759155	0.00364881	0.0138953	-0.0176679	0
156.6	-0.0238049	-0.0479801	0.000740125	-0.0125066	-0.0154611	0.0202741	-0.0377774	0.00187291	0.0401595	-0.0277885	0
156.8	0.0167666	-0.00311481	0.0171454	-0.00224806	-0.0213932	0.00126056	0.0778608	-0.00033468	0.0586482	-0.0146942	0
157	0.00363818	-0.0131813	0.0113699	-0.0165407	0.00351023	-0.00740839	0.0151664	0.0314161	-0.00821612	0.0230309	0
157.2	0.000864236	0.00306232	-0.0085815	-0.00932228	0.00287949	-0.0156113	-0.0290023	0.0278202	-0.0268207	-0.000894121	0
157.4	0.00863234	0.0317725	-0.0200883	0.0279671	-0.01219	-0.00419539	0.00648697	-0.0220044	0.012584	-0.0391751	0
157.6	-0.00915344	-0.0230714	-0.0232535	0.0406703	-0.00273627	0.0170597	-0.0146959	-0.0651263	0.00180852	-0.0236674	0
157.8	0.0273208	-0.0187938	-0.0238372	0.0274931	-0.018557	-0.0151002	-0.0115411	-0.080476	-0.0171175	-0.0213557	0
158	-0.00912707	0.0251777	0.0111531	-0.0407086	-0.0436981	-0.000305815	-0.035479	-0.0158221	-0.0218687	-0.00052124	0
158.2	-0.0141672	-0.0194482	-0.0198098	-0.0352394	0.037355	-0.0274559	0.0560023	0.0333912	-0.0526802	0.0108129	0
158.4	0.00874915	-0.0224863	0.0179038	-0.0262859	0.0361574	0.00466492	0.0369122	0.0363859	-0.0246864	0.0499434	0
158.6	0.0165071	0.022687	0.0296467	-0.00645659	0.00846407	0.0292849	0.00405319	0.0371762	0.0176991	0.0139013	0
158.8	0.00788209	0.0312618	-0.00477136	0.0192888	0.0125212	-0.000201659	0.0238064	0.0135275	0.0179208	-0.0262004	0
159	-0.00218306	0.00341399	0.0375953	-0.00102406	-0.0148432	0.00371266	-0.0442914	-0.0334675	0.0281278	0.0488396	0
159.2	0.00600196	-0.0180758	0.0315769	0.00545744	0.025294	0.00141538	-0.0485427	-0.00438664	0.0404879	0.0343063	0
159.4	0.0428619	0.0395238	0.0130362	0.010416	0.0132044	-0.00641609	0.0419095	-0.00503775	-0.00602076	0.0227518	0
159.6	-0.0141633	0.0221444	-0.00804197	-0.0200766	-0.00542436	-0.00669562	0.0430239	0.0642574	-0.00339908	0.0114128	0
159.8	-0.00960534	0.011014	0.0139943	-0.0205093	0.0217944	0.000243307	0.0259703	0.0496907	0.0279686	-0.0137198	0
160	0.0261901	0.01845	-0.00119617	0.0115876	0.0151878	0.0294197	0.0297482	-0.00863681	0.00224009	-0.00292778	0
160.2	-0.0048607	-0.00505967	-0.0334111	0.0350707	-0.0218136	0.0350934	0.0213776	-0.000551286	-0.01914	0.019267	0
160.4	-0.00930847	0.000158718	0.0346496	0.0351654	0.00227093	-0.0142158	0.0150637	-0.00685648	0.0212834	-0.00999709	0
160.6	-0.015978	0.00733239	0.0284367	-0.0118479	-0.0166244	0.00317059	-0.0365677	0.0219167	-0.0263771	-0.00364494	0
160.8	0.00717206	-0.0137896	0.00576396	0.0084871	-0.0419528	-0.00445941	-0.042013	0.019122	-0.000602202	-0.0204669	0
161	-0.0106415	0.00348878	0.00192827	0.0201579	-0.0243989	-0.0193405	-0.0259705	-0.0124457	-0.00808877	-0.0428961	0
161.2	0.0010808	0.0356652	0.0135114	-0.00822796	-0.013633	-0.0160332	-0.0143576	-0.0200339	0.0318728	-0.0285488	0
161.4	0.0313888	0.0116155	0.0129266	-0.0243237	-0.0109658	-0.0143742	0.00153688	-0.0116986	0.059731	-0.00776715	0
161.6	0.0141052	-0.0264067	-0.0149503	-0.00953382	0.0203019	-0.010802	0.00658997	-0.00266044	-0.0181861	-0.000190846	0
161.8	0.0125537	-0.00937701	-0.0326705	0.00518574	0.030494	0.00564121	-0.0133014	0.00705882	-0.0154925	0.0236091	0
162	-0.0216883	-0.040968	-0.00544144	0.00812139	0.000879609	-0.0167324	0.00507646	-0.0532297	-0.0230731	0.00273876	0
162.2	-0.0215304	0.00370593	0.0229448	-0.0132665	0.00576462	0.024251	0.0497824	0.0498459	0.00978625	0.0112658	0
162.4	-0.011322	-0.000898186	0.00794002	0.0221517	0.0181907	0.0122644	0.00994022	0.0293159	0.0345273	0.020407	0
162.6	-0.00878416	-0.0355652	-0.0264384	0.0217825	0.0546029	-0.0061215	-0.00333293	-0.0442919	0.0173166	0.0531345	0
162.8	-0.00608737	0.00358082	-0.0267145	-0.0115857	0.0472892	0.0349979	0.0273629	0.0203225	-0.0382144	0.056312	0
163	-0.012542	0.0336092	-0.014345	0.0206637	-0.0408548	0.030264	-0.00575012	0.0511846	-0.0642833	-0.022809	0
163.2	-0.0264527	-0.0157759	-0.0361486	-0.00610206	-0.00927538	-0.0154234	0.0187903	-0.0291707	0.0261897	-0.0188997	0
163.4	-0.0286652	0.018373	0.026621	0.018517	0.0164379	0.0134323	-0.0123541	-0.0668523	0.000501442	-0.018112	0
163.6	0.036298	0.0206521	0.0141328	0.00035443	-0.00369367	0.0140888	-0.056909	-0.0102324	-0.0513808	-0.0256663	0
163.8	0.00990162	-0.0244511	0.0143173	-0.0374828	-0.0161084	-0.00575166	-0.00353874	0.0333166	0.0151368	-0.0250379	0
164	-0.0403655	-0.0236522	0.0260581	-0.0268056	-0.017029	-0.00442291	0.00927056	0.044734	0.0493858	-0.0208775	0
164.2	0.010821	0.00807201	-0.0139777	-0.0152102	-0.0412166	-0.00978893	-0.0556616	0.0358485	-0.0264968	-0.0112407	0
164.4	0.0303089	-0.0169033	-0.00111011	-0.0215007	-0.0471527	-0.0371974	-0.0140309	-0.0275808	-0.0255077	0.0124248	0
164.6	0.00896556	-0.0309791	0.0275207	0.0546547	0.0301328	-0.0416121	-0.00729371	-0.0481715	0.00373875	0.0166132	0
164.8	-0.00226564	0.040745	-0.0129275	-0.0094067	0.0357072	-0.00522731	0.042156	-0.03001	0.0301636	-0.0459928	0
165	-0.000155991	0.0699302	-0.0164949	-0.0182264	-0.00406902	-0.0136897	0.0517197	0.041278	-0.0132099	-0.00302387	0
165.2	-0.00639012	0.00943621	-0.000162265	-0.0124002	-0.0156723	-0.00992328	-0.00556402	0.0253815	-0.0308246	0.0587587	0
165.4	-0.00246828	-0.038209	-0.0172379	-0.0158277	-0.00636755	0.0155054	-0.0431635	-0.0377678	0.0210755	0.0470106	0
165.6	0.0095112	-0.00441533	-0.020156	0.0226931	0.0110326	0.0133083	-0.0187453	-0.02708	0.0213094	0.0336766	0
165.8	-0.00947392	0.028363	0.0189089	-0.0249553	0.0342732	0.0308883	0.0165664	-0.0351364	-0.034403	-0.000566512	0
166	0.0111853	-0.0224763	0.0383891	0.0172665	-0.0319643	-0.00188101	0.0346913	0.0435164	0.0380764	-0.0671001	0
166.2	-0.00401713	-0.0100244	-0.00699461	0.00786691	-0.0437117	-0.00313657	0.0101222	0.0393266	0.0364546	-0.0249141	0
166.4	-0.00020265	0.0198291	-0.0311901	-0.00738973	0.00211701	0.00883757	-0.0129532	0.0253643	-0.00282084	-0.00637607	0
166.6	0.00424724	0.0147735	0.00489936	0.0155252	0.00165547	-0.00171506	-0.00162274	-0.0265734	-0.021699	-0.00829083	0
166.8	-0.00788779	-0.00686152	0.0297452	0.0333922	-0.00223968	-0.01622	0.00218253	-0.0695921	-0.0197327	0.00320172	0
167	0.0183131	-0.0304311	0.0073456	0.0322088	0.0362824	0.000732684	-0.0263898	-0.000247527	-0.00497842	-0.0331043	0
167.2	0.0335172	-0.0340628	0.000630662	0.00508463	-0.0258397	0.0416323	-0.0211571	-0.0159633	-0.0465657	-0.0129042	0
167.4	0.0351337	-0.0432923	-0.0184046	-0.0483982	0.0040716	0.00879964	-0.00137523	0.100218	-0.0251835	0.0100501	0
167.6	-0.0297444	-0.0145807	-0.0089228	-0.00431534	0.011098	-0.00339847	0.0273731	0.0306237	0.057375	0.0229347	0
167.8	-0.0438685	0.0348093	-0.0130072	0.00106922	0.0142647	-0.00279698	-1.06572e-05	-0.0623068	0.0449791	0.00284824	0
168	-0.00510557	0.0428891	-0.0108455	-0.0215413	0.0194714	-0.0279187	-0.000715225	-0.0120471	-0.0479273	0.0046561	0
168.2	-0.0104486	-0.00826299	0.0124059	0.0158167	-0.00317877	-0.0388561	0.0550367	0.00837192	-0.0556182	0.00803038	0
168.4	-0.023171	-0.0470983	-0.0110723	0.0097892	0.00693656	-0.0118196	0.021257	-0.0432858	0.0139656	-0.0631568	0
168.6	-0.0166239	0.00730123	-0.00422711	0.0138082	0.00186094	-0.000661222	0.00200487	-0.0153431	-0.00413862	-0.00293209	0
168.8	0.00723275	0.017447	0.0105841	-0.0370451	0.00257643	-0.00671479	-0.00693192	-0.0214692	-0.00857329	0.0650899	0
169	-0.00390621	0.013163	0.0146765	-0.0107116	-0.0107278	-0.0231734	-0.0099558	0.0106135	0.0170861	0.00310721	0
169.2	-0.000518129	0.023497	-0.012064	0.00753648	-0.0112252	-0.0155116	-0.0109643	0.0236518	-0.0030206	-0.0191144	0
169.4	0.0191661	0.0187752	-0.0268973	-0.0206692	0.00351697	0.0135556	-0.0108578	-0.0252397	-0.0167754	0.0122568	0
169.6	0.00675555	-0.00450414	-0.00397914	-0.00622152	-0.00680828	0.0346086	-0.019214	-0.0178892	0.0293194	-0.0145554	0
169.8	0.0157403	-0.0258972	-0.0111031	-0.0237994	-0.016256	0.0404124	-0.0494123	0.0547804	0.0172726	0.0316639	0
170	0.0147794	-0.0389666	0.00842316	-0.00626656	0.00522012	-0.0171989	-0.0409715	0.0411838	0.0116357	0.00132672	0
170.2	0.000104123	0.0212273	-0.00667223	-0.00672822	-0.0166388	-0.00770697	0.00605591	-0.00499711	0.00566906	0.00852444	0
170.4	-0.00160747	-0.0200408	0.00183412	0.015172	0.00124884	0.00916628	-0.00886631	-0.0297718	0.00237599	0.0107502	0
170.6	-0.00145458	-0.0448915	0.00112134	0.0168089	0.0332553	-0.0139061	-0.0394615	0.0035911	0.0125403	-0.0139949	0
170.8	-0.0210342	0.0224831	-0.0137198	-0.00645038	0.00929712	-0.00859064	-0.00962801	0.0443189	-0.0160088	-0.0258979	0
171	-0.025626	-0.016863	0.0214519	0.0114289	-0.00269709	0.0175241	0.0209526	0.00322216	-0.0739019	-0.0264975	0
[truncated: 380 more rows]

## Sheet: SEM
Time	gamma-5	gamma-4	gamma-3	gamma-2	alpha	stimulus
[truncated: 101 more rows]

[truncated: 1 more sheets: Average_left_right _combined]
