# Supplementary material for: Multiphoton imaging of neural structure and activity in Drosophila through the intact cuticle
Source: eLife. 2022 Jan 24;11:e69094. doi: 10.7554/eLife.69094 (PMC8846588; doi:10.7554/eLife.69094)
Supplement: Figure 7—source data 5. [file elife-69094-fig7-data5.xlsx]

## Sheet: maxDff
		gamma-L5	gamma-L4	gamma-L3	gamma-L2	alpha-L	gamma-R5	gamma-R4	gamma-R3	gamma-R2	alpha-R			gamma-5	gamma-4	gamma-3	gamma-2	alpha
20200806_0hr	1	0.176374	0.172142	0.119511	0.0690153	0.0520294	0.14213	0.174583	0.11654	0.133153	0.172414		1	0.159252	0.173363	0.118026	0.101084	0.112222
	2	0.198435	0.212974	0.154726	0.176179	0.119373	0.125439	0.14091	0.233061	0.184658	0.145351		2	0.161937	0.176942	0.193894	0.180418	0.132362
	3	0.164594	0.186129	0.126041	0.0960036	0.0548249	0.122275	0.233152	0.117732	0.194386	0.186071		3	0.143434	0.209641	0.121887	0.145195	0.120448
20200806_4hr	1	0.168192	0.124929	0.134794	0.0887478	0.166895	0.133137	0.251476	0.263016	0.152622	0.113191		1	0.150664	0.188203	0.198905	0.120685	0.140043
	2	0.204171	0.24	0.225677	0.163079	0.138895	0.149741	0.200574	0.26043	0.161863	0.118549		2	0.176956	0.220287	0.243054	0.162471	0.128722
	3	0.161898	0.173855	0.21806	0.169174	0.137506	0.0850952	0.149208	0.124925	0.13806	0.156528		3	0.123497	0.161532	0.171492	0.153617	0.147017
20200806_8hr	1	0.179696	0.131877	0.161348	0.170971	0.143955	0.0754375	0.135111	0.151635	0.114873	0.152971		1	0.127567	0.133494	0.156491	0.142922	0.148463
	2	0.195437	0.15294	0.156524	0.150349	0.135311	0.190131	0.224999	0.166641	0.124546	0.115623		2	0.192784	0.188969	0.161582	0.137447	0.125467
	3	0.137088	0.170851	0.158555	0.122203	0.0918667	0.105478	0.236647	0.16884	0.141452	0.133788		3	0.121283	0.203749	0.163697	0.131828	0.112827
20200806_12hr	1	0.15557	0.188444	0.155446	0.22147	0.102743	0.141579	0.25584	0.178567	0.148773	0.0847917		1	0.148574	0.222142	0.167007	0.185122	0.0937675
	2	0.123723	0.184001	0.139349	0.155939	0.110788	0.140341	0.146515	0.170535	0.147003	0.104908		2	0.132032	0.165258	0.154942	0.151471	0.107848
	3	0.117691	0.155365	0.204226	0.15717	0.111629	0.104059	0.199612	0.134913	0.13493	0.118914		3	0.110875	0.177488	0.169569	0.14605	0.115271
20200807_0hr	1	0.133117	0.135873	0.138103	0.121893	0.0569622	0.184955	0.170521	0.155657	0.136526	0.062817		1	0.159036	0.153197	0.14688	0.12921	0.0598896
	2	0.061906	0.0661387	0.087911	0.0229393	0.0414424	0.190539	0.123685	-0.0130605	0.0503218	0.0382605		2	0.126222	0.094912	0.0374252	0.0366306	0.0398515
	3	0.138223	0.207113	0.214246	0.149475	0.0493897	0.114223	0.11669	0.141295	0.111112	0.0588142		3	0.126223	0.161901	0.177771	0.130293	0.0541019
20200807_4hr	1	0.121949	0.127047	0.0763415	0.0744734	0.0468533	0.114522	0.0759827	0.049922	0.0429697	0.0496033		1	0.118235	0.101515	0.0631317	0.0587216	0.0482283
	2	0.0676001	0.103186	0.130341	0.0853051	0.0554606	0.0334856	0.0762972	0.12854	0.113247	0.024576		2	0.0505428	0.0897418	0.12944	0.099276	0.0400183
	3	0.0959181	0.105162	0.0742948	0.0728801	0.0811253	0.104154	0.0976713	0.0594912	0.033901	0.0572567		3	0.100036	0.101417	0.066893	0.0533906	0.069191
20200807_8hr	1	0.161379	0.147678	0.131544	0.126475	0.0768605	0.129975	0.174427	0.098907	0.0649456	0.0339284		1	0.145677	0.161052	0.115226	0.0957104	0.0553944
	2	0.135035	0.105389	0.14771	0.106968	0.102679	0.0772335	0.0554372	0.0603169	0.089038	0.0414633		2	0.106134	0.0804132	0.104013	0.0980032	0.072071
	3	0.0762039	0.0639347	0.0814109	0.112547	0.0560738	0.140655	0.114534	0.067165	0.0589937	0.0373873		3	0.10843	0.0892341	0.074288	0.0857703	0.0467305
20200807_12hr	1	0.157726	0.116496	0.129043	0.0726799	0.0701192	0.128615	0.113699	0.150454	0.11097	0.119003		1	0.143171	0.115098	0.139748	0.091825	0.094561
	2	0.140599	0.101585	0.0921247	0.0769412	0.0415631	0.139455	0.0839398	0.0833905	0.110236	0.0768166		2	0.140027	0.0927624	0.0877576	0.0935886	0.0591898
	3	0.152096	0.157306	0.114878	0.0875267	0.0544153	0.144547	0.129822	0.145383	0.11139	0.0792042		3	0.148322	0.143564	0.13013	0.0994584	0.0668097
20200813_0hr	1	0.200141	0.190744	0.184118	0.153951	0.112512	0.141808	0.194337	0.175862	0.121547	0.10306		1	0.170974	0.192541	0.17999	0.137749	0.107786
	2	0.165411	0.230178	0.196828	0.162997	0.107057	0.159451	0.148582	0.146501	0.114549	0.0904628		2	0.162431	0.18938	0.171665	0.138773	0.0987597
	3	0.144071	0.151089	0.182378	0.150382	0.077739	0.129669	0.130361	0.144807	0.129092	0.088454		3	0.13687	0.140725	0.163593	0.139737	0.0830965
20200813_4hr	1	0.212304	0.303884	0.231989	0.228742	0.148565	0.249994	0.221104	0.185537	0.165093	0.167565		1	0.231149	0.262494	0.208763	0.196917	0.158065
	2	0.0807754	0.152017	0.120169	0.168073	0.0996762	0.134111	0.118658	0.142571	0.116657	0.121713		2	0.107443	0.135338	0.13137	0.142365	0.110695
	3	0.09621	0.100574	0.106735	0.108295	0.0577584	0.106478	0.136111	0.127816	0.106343	0.105858		3	0.101344	0.118342	0.117276	0.107319	0.0818083
20200813_8hr	1	0.213316	0.208127	0.211002	0.179933	0.143473	0.190856	0.187062	0.164375	0.176199	0.0888368		1	0.202086	0.197594	0.187689	0.178066	0.116155
	2	0.195221	0.129205	0.188988	0.151948	0.116486	0.109418	0.132729	0.0799097	0.121424	0.0912199		2	0.152319	0.130967	0.134449	0.136686	0.103853
	3	0.128127	0.143219	0.179077	0.110203	0.080939	0.117726	0.14089	0.119346	0.111672	0.0559748		3	0.122926	0.142055	0.149212	0.110938	0.0684569
20200813_12hr	1	0.224431	0.260587	0.191368	0.130372	0.0999254	0.2432	0.214522	0.107196	0.104913	0.166702		1	0.233816	0.237554	0.149282	0.117642	0.133314
	2	0.150263	0.161649	0.13286	0.158342	0.0773431	0.13745	0.110726	0.136098	0.101321	0.0875895		2	0.143857	0.136188	0.134479	0.129831	0.0824663
	3	0.101935	0.135161	0.120127	0.0786364	0.0771174	0.0743729	0.152377	0.118673	0.0509853	0.0561715		3	0.0881537	0.143769	0.1194	0.0648109	0.0666445
20200813_16hr	1	0.182074	0.178874	0.200634	0.100333	0.0951525	0.147499	0.127247	0.137767	0.0853319	0.0793467		1	0.164787	0.153061	0.1692	0.0928326	0.0872496
	2	0.0652285	0.0572392	0.0935278	0.0616896	0.0382144	0.0774508	0.100939	0.0936426	0.100034	0.0494873		2	0.0713396	0.079089	0.0935852	0.0808618	0.0438508
	3	0.106036	0.0762232	0.0653727	0.0820097	0.0501598	0.0472919	0.0938046	0.0542526	0.0577981	0.0273962		3	0.0766638	0.0850139	0.0598127	0.0699039	0.038778
20200813_20hr	1	0.0270142	0.0820838	0.0573862	0.0391566	0.0403906	0.0475003	0.0728581	0.0829479	0.0540796	0.0450894		1	0.0372573	0.0774709	0.070167	0.0466181	0.04274
	2	0.0517181	0.0647268	0.0279445	0.0371507	0.0467568	0.0390445	0.114809	0.0539541	0.0378594	0.0280084		2	0.0453813	0.0897679	0.0409493	0.037505	0.0373826
	3	0.0383641	0.0609878	0.0404135	0.0502754	0.0570259	0.0721623	0.0742711	0.0562245	0.0329204	0.0406591		3	0.0552632	0.0676295	0.048319	0.0415979	0.0488425
20200813_24hr	1	0.212471	0.240335	0.190792	0.0782821	0.0573056	0.172174	0.180993	0.0979171	0.0773254	0.0892952		1	0.192322	0.210664	0.144355	0.0778037	0.0733004
	2	0.131226	0.157219	0.130455	0.0745292	0.065478	0.0744773	0.113433	0.0894204	0.0526428	0.051179		2	0.102852	0.135326	0.109938	0.063586	0.0583285
	3	0.143913	0.160504	0.169937	0.0690176	0.0725908	0.106621	0.144404	0.074574	0.0606367	0.0640217		3	0.125267	0.152454	0.122255	0.0648271	0.0683062

## Sheet: 0hr
		gamma-L5	gamma-L4	gamma-L3	gamma-L2	alpha-L	gamma-R5	gamma-R4	gamma-R3	gamma-R2	alpha-R			gamma-5	gamma-4	gamma-3	gamma-2	alpha
20200806_0hr	1	0.176374	0.172142	0.119511	0.0690153	0.0520294	0.14213	0.174583	0.11654	0.133153	0.172414		1	0.159252	0.173363	0.118026	0.101084	0.112222
	2	0.198435	0.212974	0.154726	0.176179	0.119373	0.125439	0.14091	0.233061	0.184658	0.145351		2	0.161937	0.176942	0.193894	0.180418	0.132362
	3	0.164594	0.186129	0.126041	0.0960036	0.0548249	0.122275	0.233152	0.117732	0.194386	0.186071		3	0.143434	0.209641	0.121887	0.145195	0.120448
20200807_0hr	1	0.133117	0.135873	0.138103	0.121893	0.0569622	0.184955	0.170521	0.155657	0.136526	0.062817		1	0.159036	0.153197	0.14688	0.12921	0.0598896
	2	0.061906	0.0661387	0.087911	0.0229393	0.0414424	0.190539	0.123685	-0.0130605	0.0503218	0.0382605		2	0.126222	0.094912	0.0374252	0.0366306	0.0398515
	3	0.138223	0.207113	0.214246	0.149475	0.0493897	0.114223	0.11669	0.141295	0.111112	0.0588142		3	0.126223	0.161901	0.177771	0.130293	0.0541019
20200813_0hr	1	0.200141	0.190744	0.184118	0.153951	0.112512	0.141808	0.194337	0.175862	0.121547	0.10306		1	0.170974	0.192541	0.17999	0.137749	0.107786
	2	0.165411	0.230178	0.196828	0.162997	0.107057	0.159451	0.148582	0.146501	0.114549	0.0904628		2	0.162431	0.18938	0.171665	0.138773	0.0987597
	3	0.144071	0.151089	0.182378	0.150382	0.077739	0.129669	0.130361	0.144807	0.129092	0.088454		3	0.13687	0.140725	0.163593	0.139737	0.0830965

## Sheet: 4hr
		gamma-L5	gamma-L4	gamma-L3	gamma-L2	alpha-L	gamma-R5	gamma-R4	gamma-R3	gamma-R2	alpha-R			gamma-5	gamma-4	gamma-3	gamma-2	alpha
20200806_4hr	1	0.168192	0.124929	0.134794	0.0887478	0.166895	0.133137	0.251476	0.263016	0.152622	0.113191		1	0.150664	0.188203	0.198905	0.120685	0.140043
	2	0.204171	0.24	0.225677	0.163079	0.138895	0.149741	0.200574	0.26043	0.161863	0.118549		2	0.176956	0.220287	0.243054	0.162471	0.128722
	3	0.161898	0.173855	0.21806	0.169174	0.137506	0.0850952	0.149208	0.124925	0.13806	0.156528		3	0.123497	0.161532	0.171492	0.153617	0.147017
20200807_4hr	1	0.121949	0.127047	0.0763415	0.0744734	0.0468533	0.114522	0.0759827	0.049922	0.0429697	0.0496033		1	0.118235	0.101515	0.0631317	0.0587216	0.0482283
	2	0.0676001	0.103186	0.130341	0.0853051	0.0554606	0.0334856	0.0762972	0.12854	0.113247	0.024576		2	0.0505428	0.0897418	0.12944	0.099276	0.0400183
	3	0.0959181	0.105162	0.0742948	0.0728801	0.0811253	0.104154	0.0976713	0.0594912	0.033901	0.0572567		3	0.100036	0.101417	0.066893	0.0533906	0.069191
20200813_4hr	1	0.212304	0.303884	0.231989	0.228742	0.148565	0.249994	0.221104	0.185537	0.165093	0.167565		1	0.231149	0.262494	0.208763	0.196917	0.158065
	2	0.0807754	0.152017	0.120169	0.168073	0.0996762	0.134111	0.118658	0.142571	0.116657	0.121713		2	0.107443	0.135338	0.13137	0.142365	0.110695
	3	0.09621	0.100574	0.106735	0.108295	0.0577584	0.106478	0.136111	0.127816	0.106343	0.105858		3	0.101344	0.118342	0.117276	0.107319	0.0818083

## Sheet: 8hr
		gamma-L5	gamma-L4	gamma-L3	gamma-L2	alpha-L	gamma-R5	gamma-R4	gamma-R3	gamma-R2	alpha-R			gamma-5	gamma-4	gamma-3	gamma-2	alpha
20200806_8hr	1	0.179696	0.131877	0.161348	0.170971	0.143955	0.0754375	0.135111	0.151635	0.114873	0.152971		1	0.127567	0.133494	0.156491	0.142922	0.148463
	2	0.195437	0.15294	0.156524	0.150349	0.135311	0.190131	0.224999	0.166641	0.124546	0.115623		2	0.192784	0.188969	0.161582	0.137447	0.125467
	3	0.137088	0.170851	0.158555	0.122203	0.0918667	0.105478	0.236647	0.16884	0.141452	0.133788		3	0.121283	0.203749	0.163697	0.131828	0.112827
20200807_8hr	1	0.161379	0.147678	0.131544	0.126475	0.0768605	0.129975	0.174427	0.098907	0.0649456	0.0339284		1	0.145677	0.161052	0.115226	0.0957104	0.0553944
	2	0.135035	0.105389	0.14771	0.106968	0.102679	0.0772335	0.0554372	0.0603169	0.089038	0.0414633		2	0.106134	0.0804132	0.104013	0.0980032	0.072071
	3	0.0762039	0.0639347	0.0814109	0.112547	0.0560738	0.140655	0.114534	0.067165	0.0589937	0.0373873		3	0.10843	0.0892341	0.074288	0.0857703	0.0467305
20200813_8hr	1	0.213316	0.208127	0.211002	0.179933	0.143473	0.190856	0.187062	0.164375	0.176199	0.0888368		1	0.202086	0.197594	0.187689	0.178066	0.116155
	2	0.195221	0.129205	0.188988	0.151948	0.116486	0.109418	0.132729	0.0799097	0.121424	0.0912199		2	0.152319	0.130967	0.134449	0.136686	0.103853
	3	0.128127	0.143219	0.179077	0.110203	0.080939	0.117726	0.14089	0.119346	0.111672	0.0559748		3	0.122926	0.142055	0.149212	0.110938	0.0684569

## Sheet: 12hr
		gamma-L5	gamma-L4	gamma-L3	gamma-L2	alpha-L	gamma-R5	gamma-R4	gamma-R3	gamma-R2	alpha-R			gamma-5	gamma-4	gamma-3	gamma-2	alpha
20200806_12hr	1	0.15557	0.188444	0.155446	0.22147	0.102743	0.141579	0.25584	0.178567	0.148773	0.0847917		1	0.148574	0.222142	0.167007	0.185122	0.0937675
	2	0.123723	0.184001	0.139349	0.155939	0.110788	0.140341	0.146515	0.170535	0.147003	0.104908		2	0.132032	0.165258	0.154942	0.151471	0.107848
	3	0.117691	0.155365	0.204226	0.15717	0.111629	0.104059	0.199612	0.134913	0.13493	0.118914		3	0.110875	0.177488	0.169569	0.14605	0.115271
20200807_12hr	1	0.157726	0.116496	0.129043	0.0726799	0.0701192	0.128615	0.113699	0.150454	0.11097	0.119003		1	0.143171	0.115098	0.139748	0.091825	0.094561
	2	0.140599	0.101585	0.0921247	0.0769412	0.0415631	0.139455	0.0839398	0.0833905	0.110236	0.0768166		2	0.140027	0.0927624	0.0877576	0.0935886	0.0591898
	3	0.152096	0.157306	0.114878	0.0875267	0.0544153	0.144547	0.129822	0.145383	0.11139	0.0792042		3	0.148322	0.143564	0.13013	0.0994584	0.0668097
20200813_12hr	1	0.224431	0.260587	0.191368	0.130372	0.0999254	0.2432	0.214522	0.107196	0.104913	0.166702		1	0.233816	0.237554	0.149282	0.117642	0.133314
	2	0.150263	0.161649	0.13286	0.158342	0.0773431	0.13745	0.110726	0.136098	0.101321	0.0875895		2	0.143857	0.136188	0.134479	0.129831	0.0824663
	3	0.101935	0.135161	0.120127	0.0786364	0.0771174	0.0743729	0.152377	0.118673	0.0509853	0.0561715		3	0.0881537	0.143769	0.1194	0.0648109	0.0666445

## Sheet: stats_Anova
Table Analyzed	DeltaF
Two-way RM ANOVA	Matching: Stacked
Assume sphericity?	No
Alpha	0.05
Source of Variation	% of total variation	P value	P value summary	Significant?	Geisser-Greenhouse's epsilon
Time x Column Factor	1.021	0.9599	ns	No
Time	0.7539	0.4942	ns	No	0.7726
Column Factor	7.93	0.2451	ns	No
Subject	58.12	<0.0001	****	Yes
ANOVA table	SS	DF	MS	F (DFn, DFd)	P value
Time x Column Factor	0.00261	9	0.00029	F (9, 96) = 0.3384	P=0.9599
Time	0.001928	3	0.0006426	F (2.318, 74.17) = 0.7498	P=0.4942
Column Factor	0.02028	3	0.00676	F (3, 32) = 1.455	P=0.2451
Subject	0.1486	32	0.004644	F (32, 96) = 5.419	P<0.0001
Residual	0.08228	96	0.0008571
Data summary
Number of columns (Column Factor)	4
Number of rows (Time)	4
Number of subjects (Subject)	36
Number of missing values	0

## Sheet: Multiple comparisons
Within each row, compare columns (simple effects within rows)
Number of families	4
Number of comparisons per family	6
Alpha	0.05
Tukey's multiple comparisons test	Mean Diff.	95.00% CI of diff.	Below threshold?	Summary	Adjusted P Value
0hr
gamma5 vs. gamma4	-0.01625	-0.05384 to 0.02134	No	ns	0.5873
gamma5 vs. gamma3	0.003917	-0.04820 to 0.05604	No	ns	0.9954
gamma5 vs. gamma2	0.02303	-0.02011 to 0.06617	No	ns	0.4121
gamma4 vs. gamma3	0.02016	-0.03675 to 0.07707	No	ns	0.7371
gamma4 vs. gamma2	0.03928	-0.01046 to 0.08902	No	ns	0.1491
gamma3 vs. gamma2	0.01912	-0.04054 to 0.07877	No	ns	0.7943
4hr
gamma5 vs. gamma4	-0.02433	-0.1001 to 0.05140	No	ns	0.794
gamma5 vs. gamma3	-0.01894	-0.09669 to 0.05882	No	ns	0.8957
gamma5 vs. gamma2	0.007234	-0.05999 to 0.07446	No	ns	0.9895
gamma4 vs. gamma3	0.005394	-0.07712 to 0.08791	No	ns	0.9976
gamma4 vs. gamma2	0.03157	-0.04176 to 0.1049	No	ns	0.613
gamma3 vs. gamma2	0.02617	-0.04930 to 0.1016	No	ns	0.7517
8hr
gamma5 vs. gamma4	-0.005369	-0.05977 to 0.04903	No	ns	0.9917
gamma5 vs. gamma3	0.003618	-0.04361 to 0.05085	No	ns	0.9961
gamma5 vs. gamma2	0.01798	-0.02550 to 0.06146	No	ns	0.6434
gamma4 vs. gamma3	0.008987	-0.04557 to 0.06355	No	ns	0.9637
gamma4 vs. gamma2	0.02335	-0.02844 to 0.07515	No	ns	0.5702
gamma3 vs. gamma2	0.01436	-0.02936 to 0.05809	No	ns	0.7823
12hr
gamma5 vs. gamma4	-0.01611	-0.07502 to 0.04280	No	ns	0.8601
gamma5 vs. gamma3	0.004057	-0.04161 to 0.04972	No	ns	0.9936
gamma5 vs. gamma2	0.02323	-0.02843 to 0.07488	No	ns	0.5838
gamma4 vs. gamma3	0.02017	-0.03275 to 0.07308	No	ns	0.6802
gamma4 vs. gamma2	0.03934	-0.01826 to 0.09693	No	ns	0.2433
gamma3 vs. gamma2	0.01917	-0.02430 to 0.06264	No	ns	0.5897
Test details	Mean 1	Mean 2	Mean Diff.	SE of diff.	N1	N2	q	DF
0hr
gamma5 vs. gamma4	0.1496	0.1658	-0.01625	0.01261	9	9	1.822	11.69
gamma5 vs. gamma3	0.1496	0.1457	0.003917	0.01701	9	9	0.3257	9.909
gamma5 vs. gamma2	0.1496	0.1266	0.02303	0.01429	9	9	2.279	10.8
gamma4 vs. gamma3	0.1658	0.1457	0.02016	0.01964	9	9	1.452	14.36
gamma4 vs. gamma2	0.1658	0.1266	0.03928	0.01734	9	9	3.203	15.65
gamma3 vs. gamma2	0.1457	0.1266	0.01912	0.02076	9	9	1.302	15.4
4hr
gamma5 vs. gamma4	0.1289	0.1532	-0.02433	0.02641	9	9	1.303	15.69
gamma5 vs. gamma3	0.1289	0.1478	-0.01894	0.02708	9	9	0.9892	15.48
gamma5 vs. gamma2	0.1289	0.1216	0.007234	0.02348	9	9	0.4358	15.88
gamma4 vs. gamma3	0.1532	0.1478	0.005394	0.02884	9	9	0.2645	15.97
gamma4 vs. gamma2	0.1532	0.1216	0.03157	0.02549	9	9	1.752	15.23
gamma3 vs. gamma2	0.1478	0.1216	0.02617	0.02617	9	9	1.414	14.94
8hr
gamma5 vs. gamma4	0.1421	0.1475	-0.005369	0.01889	9	9	0.4019	15.11
gamma5 vs. gamma3	0.1421	0.1385	0.003618	0.01651	9	9	0.3099	16
gamma5 vs. gamma2	0.1421	0.1242	0.01798	0.01515	9	9	1.679	15.51
gamma4 vs. gamma3	0.1475	0.1385	0.008987	0.01895	9	9	0.6705	15.16
gamma4 vs. gamma2	0.1475	0.1242	0.02335	0.01778	9	9	1.857	13.76
gamma3 vs. gamma2	0.1385	0.1242	0.01436	0.01522	9	9	1.334	15.47
12hr
gamma5 vs. gamma4	0.1432	0.1593	-0.01611	0.02052	9	9	1.11	15.51
gamma5 vs. gamma3	0.1432	0.1391	0.004057	0.01566	9	9	0.3663	13.67
gamma5 vs. gamma2	0.1432	0.12	0.02323	0.01805	9	9	1.82	15.93
gamma4 vs. gamma3	0.1593	0.1391	0.02017	0.01789	9	9	1.595	12.29
gamma4 vs. gamma2	0.1593	0.12	0.03934	0.02001	9	9	2.781	15.14
gamma3 vs. gamma2	0.1391	0.12	0.01917	0.01498	9	9	1.809	14.18
